# Supplementary material
Source: PubMed Central journal article supplement (PMC1237083)
Supplement: mbc_E05-05-0436_1.pdf [file mbc_E05-05-0436_1.pdf]

| UNIQUID           | NAME                                                                                                                                                                                                                      | A mock 0            | A mock 10         | A mock 20         | A mock 40   | A mock 80   | B |
|-------------------|---------------------------------------------------------------------------------------------------------------------------------------------------------------------------------------------------------------------------|---------------------|-------------------|-------------------|-------------|-------------|---|
| APD 0 B APD 10    | B APD 20                                                                                                                                                                                                                  | B APD 40            | B APD 80          | C DPTA 0          | C DPTA 10   | C           |   |
| DPTA 20           | C DPTA 40                                                                                                                                                                                                                 | C DPTA 80           | D DPTA 0          | D DPTA 10         | D DPTA 20   | D DPTA      |   |
| 40                | D DPTA 80                                                                                                                                                                                                                 | E DPTA 0 fzf1del    | E DPTA 10 fzf1del | E DPTA 20 fzf1del | E DPTA      |             |   |
| 40 fzf1del        | E DPTA 80 fzf1del                                                                                                                                                                                                         | F DPTA 0            | F DPTA 10         | F DPTA 20         | F DPTA 40   | F           |   |
| DPTA 80           | F DPTA 120                                                                                                                                                                                                                | G DPTA 0 yhb1del    | G DPTA 10 yhb1del | G DPTA 20 yhb1del | G           |             |   |
| DPTA 40 yhb1del   | G DPTA 80 yhb1del                                                                                                                                                                                                         | G DPTA 120 yhb1 del | H DPTA 0 fzf1del  | H                 |             |             |   |
| DPTA 10 fzf1del   | H DPTA 20 fzf11del                                                                                                                                                                                                        | H DPTA 40 fzf1del   | H DPTA 80 fzf1del | H                 |             |             |   |
| DPTA 120 fzf1 del | I NO gas 120                                                                                                                                                                                                              |                     |                   |                   |             |             |   |
| YGR247W           | "YGR247W::CPD1::2',3'-cyclic nucleotide 3'-phosphodiesterase, similar to cyclic phosphodiesterases from Arapidopsis and wheat" 1                                                                                          |                     |                   |                   |             |             |   |
|                   | 0.817436507                                                                                                                                                                                                               | 0.981498472         | 1.096497401       | 0.796857505       | 1           | 0.884054879 |   |
|                   | 0.964853199                                                                                                                                                                                                               | 1.157992954         | 1                 | 1.089038511       | 1.083987124 | 1.307341348 |   |
|                   | 0.985274985                                                                                                                                                                                                               | 1                   | 1.062283089       | 0.719952502       | 1           | 2.033001074 |   |
|                   | 1.545936069                                                                                                                                                                                                               | 1.652205115         | 0.984962666       | 1.019146081       | 1.301447046 |             |   |
|                   | 1.105292686                                                                                                                                                                                                               | 1.032464884         | 1                 | 0.998178988       | 0.870050025 | 0.988247227 |   |
|                   | 1.275732713                                                                                                                                                                                                               | 1                   | 1.043527109       | 0.866086946       | 0.955031979 |             |   |
|                   | 0.876209386                                                                                                                                                                                                               | 0.960559531         |                   |                   |             |             |   |
| YGR261C           | "YGR261C::APL6::beta3-like subunit of the yeast AP-3 complex which functions in transport of alkaline phosphatase to the vacuole via the alternate pathway, suppressor of loss of casein kinase 1 function" 1 0.901466102 |                     |                   |                   |             |             |   |
|                   | 0.812631731                                                                                                                                                                                                               | 1.20252768          | 1.029228901       | 1                 | 1.083020634 | 1.152734112 |   |
|                   | 0.911046713                                                                                                                                                                                                               | 0.928976895         | 1                 | 1.030356501       | 0.924556575 | 0.708075459 |   |
|                   | 1.114642225                                                                                                                                                                                                               | 1                   | 1.183835744       | 0.96142098        | 1.384476464 | 0.802673149 | 1 |
|                   | 0.771943707                                                                                                                                                                                                               | 0.651028007         | 0.762435762       | 0.971137361       | 1           | 0.988225496 |   |
|                   | 1.048242094                                                                                                                                                                                                               | 1.076140478         | 1.015068356       | 1.001789984       | 1           | 1.051342623 |   |
|                   | 0.944237006                                                                                                                                                                                                               | 0.948638355         | 0.91704266        | 0.709455155       | 1           | 0.915771158 |   |
|                   | 1.11787401                                                                                                                                                                                                                | 0.977195035         | 0.930638264       | 0.954994312       | 1.386112744 |             |   |
| YGR263C           | YGR263C::molecular_function unknown 1 0.953555686                                                                                                                                                                         |                     |                   |                   |             |             |   |
|                   | 0.896402274                                                                                                                                                                                                               | 1.155307937         | 0.884350174       | 1                 | 0.984929573 | 0.98900369  |   |
|                   | 1.040348799                                                                                                                                                                                                               | 1.036990616         | 1                 | 1.064380176       | 1.02572823  | 1.016821042 |   |
|                   | 1.27922675                                                                                                                                                                                                                | 1.204346532         | 1.317608435       | 1.640756624       | 0.947581025 | 1           |   |
|                   | 0.974837521                                                                                                                                                                                                               | 1.090693253         | 1.046826005       | 0.740117958       | 1           | 1.055159317 |   |
|                   | 1.223720223                                                                                                                                                                                                               | 1.140214401         | 1.002612396       | 0.953917328       | 1           | 0.959972565 |   |
|                   | 0.956625951                                                                                                                                                                                                               | 1.02260005          | 0.999659251       | 0.626166626       | 1           | 1.075810265 |   |
|                   | 1.026484591                                                                                                                                                                                                               | 1.093696766         | 0.809866177       | 0.978522016       | 0.964937646 |             |   |
| YGR265W           | YGR265W::molecular_function unknown 1 1.079104469                                                                                                                                                                         |                     |                   |                   |             |             |   |
|                   | 0.603597227                                                                                                                                                                                                               | 1.520947036         | 0.824600463       | 1                 | 1.432533307 | 1.287527418 |   |
|                   | 0.732863693                                                                                                                                                                                                               | 0.663521884         | 1                 | 1.224990244       | 0.831613232 | 0.285267376 |   |
|                   | 0.932269729                                                                                                                                                                                                               | 1                   | 0.29231908        | 1                 |             |             |   |
|                   | 0.510147189                                                                                                                                                                                                               | 1                   | 0.779187651       | 0.645808562       | 0.756686954 | 1.150503916 |   |
|                   | 0.930578541                                                                                                                                                                                                               | 1                   | 0.882498985       | 0.526422485       | 0.677952551 | 0.721529379 |   |
|                   | 0.157695235                                                                                                                                                                                                               | 1                   | 0.955803222       | 0.311828027       | 0.73372008  | 0.371715829 |   |
|                   | 0.330136105                                                                                                                                                                                                               | 0.484220049         |                   |                   |             |             |   |
| YOL128C           | YOL128C::YGK3::Yeast homologue of mammalian Glycogen Synthase 3 1                                                                                                                                                         |                     |                   |                   |             |             |   |
|                   | 1.10440504                                                                                                                                                                                                                | 0.824111749         | 1.162624182       | 0.798854993       | 1           | 1.14130043  |   |
|                   | 1.080368521                                                                                                                                                                                                               | 0.736784294         | 0.909605357       | 1                 | 1.067618067 | 0.608309501 |   |
|                   | 0.68318737                                                                                                                                                                                                                | 0.824972124         | 1                 | 2.408633735       | 0.889268864 | 1.41124024  |   |
|                   | 1.002323136                                                                                                                                                                                                               | 1                   | 1.673628666       | 0.601007502       | 0.577931589 | 1.090218855 | 1 |
|                   | 0.98623209                                                                                                                                                                                                                | 0.660444286         | 1.028991089       | 1.173418448       | 1.230843466 | 1           |   |
|                   | 0.795103145                                                                                                                                                                                                               | 0.590634931         | 0.876797747       | 0.851454001       | 0.65108233  | 1           |   |
|                   | 1.193286967                                                                                                                                                                                                               | 0.77900787          | 0.758801956       | 0.681694408       | 1.07104043  | 1.185594872 |   |
| YGR267C           | YGR267C::FOL2::First enzyme in biosynthetic pathway for folic acid and tetrahydrobioptern 1 1.159198175 1.110531756 0.923451864 1.279942294 1                                                                             |                     |                   |                   |             |             |   |
|                   | 1.06842044                                                                                                                                                                                                                | 1.109448123         | 1.381398092       | 1.315650872       | 1           | 1.344698867 |   |
|                   | 1.354787471                                                                                                                                                                                                               | 0.927564638         | 1                 | 1.431682322       | 1.115540099 | 0.797658544 | 1 |
|                   | 2.139740607                                                                                                                                                                                                               | 1.936193102         | 1.880769831       | 1.691150289       | 1           | 1.169414994 |   |

|             |                                                   |             |             |             |             |
|-------------|---------------------------------------------------|-------------|-------------|-------------|-------------|
| 1.161418248 | 0.92884919                                        | 0.918042763 | 1.014975526 | 1           | 1.060720866 |
| 1.327848447 | 1.117523325                                       | 0.934869749 | 1.232946614 | 1           | 1.187716223 |
| 1.419500718 | 0.989354677                                       | 1.340883995 | 1.252615317 | 1.170709299 |             |
| YOL130W     | YOL130W::ALR1::aluminium resistance               |             |             | 1           | 0.892631537 |
| 0.623036494 | 0.927487571                                       | 0.580147926 | 1           | 0.931819579 | 0.782392366 |
| 0.660102371 | 0.723815935                                       | 1           | 0.738862542 | 0.63394791  | 0.375312224 |
| 0.911915445 | 1                                                 | 0.736469264 |             | 0.682177171 | 0.436003509 |
| 0.612329133 |                                                   | 0.763127523 | 1           | 0.910993253 | 0.751234651 |
| 1.128493785 | 1.290191801                                       | 1.121276929 | 1           | 1.244699536 | 0.739479784 |
| 0.682113658 | 1.160636742                                       | 0.689006839 | 1           | 0.646439275 | 0.539436836 |
| 0.847631338 | 0.610575541                                       | 0.503385199 | 0.70049921  |             |             |
| YGR269W     | YGR269W::YGR269W::molecular_function unknown      |             |             | 1           | 1.066480282 |
|             | 1                                                 | 0.941710632 | 0.891798638 | 0.813633318 | 1           |
| 1.185909559 | 1.082801399                                       | 0.803550592 | 1.0227141   | 1           | 0.417378774 |
|             | 0.176953378                                       |             |             | 1           | 0.954734966 |
| 1.0644449   | 1                                                 | 0.922567606 | 0.73764975  |             | 1.319261198 |
| 0.73328422  |                                                   |             |             |             |             |
| YOL132W     | YOL132W::GAS4::Hypothetical ORF                   |             |             | 1.065063267 | 0.81425484  |
| 1.015276559 | 0.789049008                                       | 0.971003839 |             | 0.878461724 | 0.856166947 |
| 0.925925384 | 0.702324061                                       | 0.793456337 | 0.852699411 | 1           | 0.815178718 |
| 1.006151325 | 1                                                 |             | 0.82686262  | 1           |             |
| 1.071632939 | 0.934990411                                       | 0.9387901   | 1           | 0.678914804 | 0.748232058 |
| 0.840724373 | 0.885344957                                       | 0.993759913 | 1           | 0.778817844 | 1.011813857 |
| 0.644104008 | 0.988520095                                       | 1.150569945 |             |             |             |
| YGR271W     | YGR271W::SLH1::SKI2-like helicase                 |             |             | 1           | 1.225082852 |
| 1.556911396 | 1                                                 | 1.293045645 | 1.213180224 | 1           | 0.968061692 |
|             | 1.669783528                                       |             |             |             |             |
| 1           | 0.970825811                                       | 1.213048771 | 1.171136403 | 1.173361832 | 0.914906036 |
| 1.181946033 | 1.343630785                                       | 1.425002531 |             | 1           | 0.887699591 |
| 1.378705058 | 1.054017919                                       | 0.902732728 | 1.491187628 |             |             |
| YLR406C     | YLR406C::RPL31B::Homology to rat L31              |             |             | 1           | 1.412114839 |
| 1.431351995 |                                                   | 1.743863589 | 1           | 1.240742282 | 0.95511423  |
| 1.359370588 | 1                                                 | 1.088347668 | 1.291161547 |             | 1.431708363 |
| 0.948162986 |                                                   |             | 0.606531039 |             | 1           |
| 1.010803984 | 1.040546244                                       | 0.767362962 | 1.088849548 | 1.464285231 | 1           |
| 0.637146858 | 1.283825638                                       |             | 1           | 0.766366489 | 0.810614077 |
| 0.826877948 | 1.253294691                                       | 0.903045106 |             |             |             |
| YOL134C     | YOL134C::YOL134C::molecular_function unknown      |             |             | 1           | 1.068735441 |
| 1.207307855 | 1.046536558                                       | 1.133823634 | 1           | 0.957513331 | 1.02516664  |
| 1.463554506 | 1.337837326                                       | 1           | 1.194611899 | 1.659180376 | 1.72002401  |
| 1.385954909 | 1                                                 | 1.093056254 | 0.99739865  | 1.079120702 | 1.379408259 |
| 3.150853596 | 3.036515303                                       | 3.192212598 | 1.987555323 | 1           | 1.294751524 |
| 1.607598288 | 1.670658304                                       | 1.080960504 | 1.238635944 | 1           | 1.095149747 |
| 1.733240531 | 1.730376082                                       | 1.372547861 | 1.207019401 | 1           | 1.22498591  |
| 1.30872293  | 1.285553263                                       | 0.074140637 | 1.109566959 | 1.281913524 |             |
| YGR285C     | YGR285C::ZUO1::Zuotin has region of DnaJ homology |             |             | 1           |             |
| 0.961567933 | 0.754603987                                       | 0.741886379 | 0.713038426 | 1           | 0.853189757 |
| 0.719145859 | 0.643371902                                       | 0.784080415 | 1           | 0.804159871 | 0.726822767 |
| 0.859782318 | 1                                                 | 0.790860492 | 0.517365496 | 0.525273405 | 0.670874013 |
| 1.012778239 | 0.319566555                                       | 0.450054815 | 1.076277898 | 1           | 1.045817645 |
| 0.961913347 | 1.002842845                                       | 1.021495686 | 1.000029279 | 1           | 1.003343916 |
| 0.884548264 | 0.753919738                                       | 0.604524325 | 0.736985099 | 1           | 0.973957912 |
| 0.958808738 | 0.945303619                                       | 0.707997103 | 0.719260456 | 0.904519585 |             |
| YLR408C     | YLR408C::YLR408C::molecular_function unknown      |             |             | 1           | 0.954078466 |
| 1.090454203 | 2.104233834                                       | 1           | 1.002614016 | 1.297420238 | 1.902974055 |
| 1.446189195 | 1                                                 | 1.223074772 | 1.593226998 | 2.334922448 | 1.323746432 |
| 0.836306941 | 0.900954864                                       | 1.068280065 | 1.408803733 | 1           | 1.63687706  |

|         |                                                                                                                                                                                                                                                                 |             |             |             |             |                         |
|---------|-----------------------------------------------------------------------------------------------------------------------------------------------------------------------------------------------------------------------------------------------------------------|-------------|-------------|-------------|-------------|-------------------------|
|         | 3.699463445                                                                                                                                                                                                                                                     | 4.024909549 | 0.964094833 | 1           | 0.839138674 | 1.196972186             |
|         | 0.614751134                                                                                                                                                                                                                                                     | 0.690014395 | 1.249105305 | 1           | 0.881981478 | 1.718381414             |
|         | 1.437237798                                                                                                                                                                                                                                                     | 1.808860095 | 2.694064172 | 1           | 0.978579466 | 1.235030214             |
|         | 1.501314613                                                                                                                                                                                                                                                     | 1.654835972 | 2.469577406 | 1.271406067 |             |                         |
| YOL136C | YOL136C::PFK27::6-phosphofructo-2-kinase                                                                                                                                                                                                                        |             |             |             | 1           | 0.736238146             |
|         | 0.503732045                                                                                                                                                                                                                                                     | 0.624608833 | 0.544072893 | 1           | 0.733606817 | 0.728142935             |
|         | 0.471278301                                                                                                                                                                                                                                                     | 0.53887556  | 1           | 0.602008175 | 0.519709035 | 0.390998309             |
|         | 0.524552773                                                                                                                                                                                                                                                     | 1           | 0.927191434 | 0.620915942 | 0.676432649 | 1                       |
|         | 0.440946133                                                                                                                                                                                                                                                     | 0.421372069 | 0.991984952 | 1           | 1.000765834 | 0.901381596             |
|         | 1.127101765                                                                                                                                                                                                                                                     | 1.152137077 | 1.079232145 | 1           | 0.660418205 | 0.647904592             |
|         | 0.555556511                                                                                                                                                                                                                                                     | 0.662557006 | 0.467139426 | 1           | 0.830877809 | 0.806575119             |
|         | 0.779643787                                                                                                                                                                                                                                                     | 0.829142676 | 0.935698383 | 0.79331536  |             |                         |
| YGR287C | YGR287C::YGR287C::alpha-glucosidase                                                                                                                                                                                                                             |             |             |             | 1           | 0.975701125 0.861461822 |
|         | 1.122639746                                                                                                                                                                                                                                                     | 0.864830685 | 1           | 1.018332045 | 1.055151787 | 0.884533644             |
|         | 0.945129634                                                                                                                                                                                                                                                     | 1           | 1.095679739 | 1.070920215 | 1.115155614 | 0.917671427 1           |
|         | 1.34312669                                                                                                                                                                                                                                                      | 1.204544709 | 1.956121776 | 1.71580034  | 1           | 1.301166766             |
|         | 0.954321989                                                                                                                                                                                                                                                     | 2.499543378 | 1.240604126 | 1           | 1.257486631 | 1.393286787             |
|         | 1.758393553                                                                                                                                                                                                                                                     | 1.3121027   | 1           | 0.86652597  | 0.894612864 |                         |
|         | 0.761801242                                                                                                                                                                                                                                                     | 1           | 1.68993863  | 1.283584038 | 1.398341531 | 0.356577675             |
|         | 1.20372373                                                                                                                                                                                                                                                      | 0.946549518 |             |             |             |                         |
| YLR410W | YLR410W::VIP1::Homologous to S. pombe asp1+                                                                                                                                                                                                                     |             |             |             | 1           | 0.840763045             |
|         | 0.798710237                                                                                                                                                                                                                                                     | 1.199179966 | 0.620130569 | 1           | 1.068670166 | 1.119508183             |
|         | 0.883271324                                                                                                                                                                                                                                                     | 0.652938377 | 1           | 0.959057164 | 0.976049203 | 0.531055102             |
|         | 1.018213321                                                                                                                                                                                                                                                     | 1           | 0.866047598 | 0.711666306 | 0.888892447 | 0.686237349 1           |
|         | 0.605998006                                                                                                                                                                                                                                                     | 0.646929334 | 0.377548699 | 0.576533426 | 1           | 0.884012356             |
|         | 0.771743985                                                                                                                                                                                                                                                     | 0.882897806 | 1.180839553 | 0.997967444 | 1           | 0.914090645             |
|         | 0.524295498                                                                                                                                                                                                                                                     | 0.609845829 | 1.191331415 | 0.344844895 | 1           | 0.567363583             |
|         | 0.484472769                                                                                                                                                                                                                                                     | 0.831215341 | 0.582261593 | 0.502771096 | 1.04199261  |                         |
| YOL138C | YOL138C::YOL138C::molecular_function unknown                                                                                                                                                                                                                    |             |             |             | 1           | 1.288326715             |
|         | 0.967239591                                                                                                                                                                                                                                                     | 1.201866578 | 1.078820036 | 1           | 1.268543656 | 1.222955767             |
|         | 1.160237843                                                                                                                                                                                                                                                     | 1           | 1.156503068 | 1.389057025 | 1.044215958 | 1.29405148 1            |
|         | 0.960495086                                                                                                                                                                                                                                                     | 1.133390372 | 0.686807004 | 1           | 0.949900144 | 1.113523462             |
|         | 0.277180119                                                                                                                                                                                                                                                     | 0.659892621 | 1           | 1.183974783 | 1.149900976 | 1.233617618             |
|         | 1.213700562                                                                                                                                                                                                                                                     | 1.25559292  | 1           | 0.774079553 | 0.816340859 | 0.798848759             |
|         | 0.972734377                                                                                                                                                                                                                                                     | 0.612618626 | 1           | 0.757514489 | 0.851560118 | 0.860433799             |
|         | 0.61341658                                                                                                                                                                                                                                                      | 0.649994408 | 0.675981741 |             |             |                         |
| YGR289C | "YGR289C::MAL11::Part of MAL1 complex locus; encodes funct. maltose permease in all strains, exhibits sign. seq. variability; shows homol. to functional maltose permease from S. carlsbergensis; member of the 12 tm domain superfamily of sugar transporters" |             |             |             | 1.051128989 | 1.177407708             |
|         | 0.714647389                                                                                                                                                                                                                                                     | 1.142317238 | 0.784303478 | 1.256268611 |             |                         |
|         | 1.251279178                                                                                                                                                                                                                                                     | 0.94178743  | 1           | 2.66785804  | 1.567769052 |                         |
|         | 0.509905139                                                                                                                                                                                                                                                     | 1.131637589 | 1           | 1.164874023 | 1.042382362 |                         |
|         | 1.396382926                                                                                                                                                                                                                                                     | 0.985049666 | 1.174932839 | 1           | 0.71884106  |                         |
|         | 0.557337653                                                                                                                                                                                                                                                     | 1.108297943 | 1           | 1.008543334 | 0.591337864 | 0.966969504             |
|         | 1.283447381                                                                                                                                                                                                                                                     | 0.961435195 |             |             |             |                         |
| YLR412W | YLR412W::YLR412W::molecular_function unknown                                                                                                                                                                                                                    |             |             |             | 0.807724294 |                         |
|         | 0.908776739                                                                                                                                                                                                                                                     | 0.860972399 | 1.083718676 | 0.899570869 | 0.844655751 |                         |
|         | 1.049384154                                                                                                                                                                                                                                                     | 0.952810986 | 0.923514079 | 0.937137238 | 0.893952973 |                         |
|         | 0.920249658                                                                                                                                                                                                                                                     | 1           | 1.088806376 | 0.789147338 | 0.562659758 | 1.312971888 1           |
|         | 1.216988578                                                                                                                                                                                                                                                     | 1.218294873 | 1.229504603 | 1.077423458 | 1           | 1.083961685             |
|         | 1.068545259                                                                                                                                                                                                                                                     | 0.674844614 | 0.873761863 | 0.977309586 | 1           | 0.953513245             |
|         | 1.106724151                                                                                                                                                                                                                                                     | 0.655001721 | 0.923468534 | 1.372968787 | 1           | 1.089263845             |
|         | 1.138711397                                                                                                                                                                                                                                                     | 1.02568974  | 1.279859892 | 1.171403004 | 1.632163103 |                         |
| YOL152W | YOL152W::FRE7::similar to FRE2                                                                                                                                                                                                                                  |             |             |             | 1           | 0.889795265 0.794949688 |
|         | 0.919536152                                                                                                                                                                                                                                                     | 0.7302776   | 1           | 0.856122295 | 0.856340477 | 0.91975191              |
|         | 0.882550761                                                                                                                                                                                                                                                     | 1           | 1.210077068 | 1.102711602 | 0.833875894 | 1.272940422 1           |

|         |                                                                                                                                                                                             |             |             |             |             |             |             |
|---------|---------------------------------------------------------------------------------------------------------------------------------------------------------------------------------------------|-------------|-------------|-------------|-------------|-------------|-------------|
|         | 2.069029251                                                                                                                                                                                 | 2.712513365 | 1.477716964 | 1.638318916 | 1           |             | 2.154878512 |
|         | 5.079752959                                                                                                                                                                                 | 1           | 1.358434809 | 1.429153062 | 1.488536565 | 0.910010906 |             |
|         | 0.799625488                                                                                                                                                                                 | 1           | 1.242614011 | 1.396592747 | 2.049956304 | 1.681863751 |             |
|         | 0.495190432                                                                                                                                                                                 | 1           | 1.109251822 | 1.572672207 | 1.403125697 | 0.767076713 |             |
|         | 0.89637979                                                                                                                                                                                  | 2.637379561 |             |             |             |             |             |
| YLR414C | YLR414C::YLR414C::molecular_function                                                                                                                                                        | unknown     |             |             | 1           | 1.381591793 |             |
|         | 1.219299786                                                                                                                                                                                 | 0.902212753 | 0.998784538 | 1           | 1.046191986 | 0.929939673 |             |
|         | 1.1269276                                                                                                                                                                                   | 1.046611935 | 1           | 0.956434409 | 1.012450372 | 1.356545979 |             |
|         | 1.031085633                                                                                                                                                                                 | 1           | 1.449879934 | 0.989607696 | 1.084788987 | 1           |             |
|         | 1.495358923                                                                                                                                                                                 | 1.61864398  | 1.232998435 | 1.533366624 | 1           | 0.996324404 |             |
|         | 0.926707743                                                                                                                                                                                 | 0.974181694 | 0.953054137 | 0.781511138 |             | 1.09766496  |             |
|         | 1.449477947                                                                                                                                                                                 | 0.791122117 | 0.775915536 | 1.36277222  | 1           | 1.058798904 |             |
|         | 0.922686861                                                                                                                                                                                 | 0.672821783 | 1.008451277 | 0.59626341  |             |             |             |
| YOL154W | "YOL154W::ZPS1::Zinc and pH regulated Surface protein. Similar to Candida albicans protein Pra1, a pH-regulated cell surface glycoprotein with weak similarity to zinc metalloproteinases." |             |             |             | 1           | 1.448316817 | 0.933546684 |
|         | 0.9166008                                                                                                                                                                                   | 1.771747261 | 1           | 0.885272488 | 0.720818245 | 1.098188047 |             |
|         | 2.132672401                                                                                                                                                                                 | 1           | 0.665266348 | 0.965539538 | 1.085303186 | 1.095971463 | 1           |
|         | 0.686977193                                                                                                                                                                                 |             | 0.345326077 | 0.243433552 | 1           | 1.649616133 | 0.697714847 |
|         | 0.550239103                                                                                                                                                                                 | 0.611474848 | 1           | 1.134239244 | 1.144566102 | 1.429601435 |             |
|         | 1.208100578                                                                                                                                                                                 | 1.079367634 | 1           | 0.970543651 | 1.214623435 | 1.486754753 |             |
|         | 1.044448298                                                                                                                                                                                 | 1.026149217 | 1           | 1.2860259   | 2.621165306 | 1.896053781 |             |
|         | 1.99064112                                                                                                                                                                                  | 2.082430089 | 1.238132366 |             |             |             |             |
| YLR428C | YLR428C::YLR428C::molecular_function                                                                                                                                                        | unknown     |             |             | 1           | 0.805152631 |             |
|         | 0.991412629                                                                                                                                                                                 | 1.129384238 | 0.772839433 | 1           | 1.288772622 | 1.309356545 |             |
|         | 1.103669071                                                                                                                                                                                 | 0.89724067  | 1           | 0.954162214 | 1.097646349 | 0.741017921 |             |
|         | 1.141850059                                                                                                                                                                                 | 1           | 0.634420817 | 0.74589181  | 0.850191866 | 1           |             |
|         | 0.839990834                                                                                                                                                                                 | 0.904174117 | 0.67214805  | 0.758185628 | 1           | 0.929832799 |             |
|         | 1.005443306                                                                                                                                                                                 | 1.201155851 | 1.200496013 | 1.192998383 | 1           | 0.758002133 |             |
|         | 0.551056396                                                                                                                                                                                 |             | 0.949062389 | 0.462926503 | 1           | 0.822735855 | 0.500138337 |
|         | 0.982740875                                                                                                                                                                                 | 0.55100407  | 0.89493873  | 0.576160585 |             |             |             |
| YOL156W | YOL156W::HXT11::High-affinity hexose transporter                                                                                                                                            |             |             |             | 1           |             |             |
|         | 1.426950419                                                                                                                                                                                 | 0.850977915 |             | 0.623383004 | 1           | 1.276944112 | 1.183637643 |
|         | 0.79543727                                                                                                                                                                                  | 1           | 1.516585324 | 0.763919396 | 0.565087916 | 0.752972241 | 1           |
|         | 7.697328873                                                                                                                                                                                 |             | 3.761745638 | 1.826749453 | 1           | 1.554714442 |             |
|         | 0.461684752                                                                                                                                                                                 | 1           | 1.012193571 | 0.908525916 | 1.013394582 | 1.198790827 |             |
|         | 1.029501066                                                                                                                                                                                 | 1           | 0.738613517 | 0.712390672 |             | 0.700677835 | 0.625225501 |
|         | 1.032483617                                                                                                                                                                                 | 1.112976189 | 0.850212191 | 1.03079091  | 1.035521735 | 0.682111082 |             |
| YLR430W | YLR430W::SEN1::component of a nuclear-localized tRNA splicing complex                                                                                                                       |             |             |             |             |             |             |
|         |                                                                                                                                                                                             | 1.057675566 |             | 1.136036372 | 0.914357061 |             |             |
|         | 0.95010044                                                                                                                                                                                  |             |             | 0.980178844 | 0.905405759 | 0.69062253  |             |
|         | 1.062203102                                                                                                                                                                                 |             |             |             | 0.359727586 |             |             |
|         |                                                                                                                                                                                             |             | 0.856117081 |             | 1           | 1.276371142 |             |
|         | 1                                                                                                                                                                                           |             | 0.309392215 | 0.617625896 |             | 0.309551407 | 2.454374049 |
| YLR430W | YLR430W::SEN1::component of a nuclear-localized tRNA splicing complex                                                                                                                       |             |             |             |             |             |             |
|         | 1                                                                                                                                                                                           | 0.774177796 | 0.786098194 | 0.902037574 | 0.744722203 | 0.834424085 | 1           |
|         | 0.927968288                                                                                                                                                                                 | 1.032789878 | 0.973485014 |             | 0.866271725 | 1           | 0.748350335 |
|         | 0.738587861                                                                                                                                                                                 | 0.709245348 | 1.104488958 | 0.824617807 | 1.01222136  |             |             |
| YOL158C | YOL158C::ENB1::Siderophore transporter for enterobactin; AFT1 regulon                                                                                                                       |             |             |             |             |             |             |
|         | 1                                                                                                                                                                                           | 1.08742867  | 0.858811174 | 0.953777694 | 0.913808055 | 1           |             |
|         | 0.943475016                                                                                                                                                                                 | 0.905627045 | 0.717204037 | 0.838866133 | 1           | 5.477408609 |             |
|         | 4.987976771                                                                                                                                                                                 | 1.237659575 | 0.928592332 | 1           | 3.563784836 | 2.637914857 |             |
|         | 0.821259753                                                                                                                                                                                 | 1           | 1.660414018 | 1.164303386 | 0.407501238 | 0.471557283 | 1           |
|         | 2.29087105                                                                                                                                                                                  | 3.165680729 | 2.794409535 | 0.763510387 | 1.206005727 | 1           |             |

4.597979106 5.398953615 7.015335229 2.85080146 0.461834329 1  
 3.218803864 4.444349843 1.578297771 0.749892193 0.71757635 0.852857756  
 YLR432W YLR432W::IMD3::IMP dehydrogenase homolog 1 1.044397251  
 0.673577392 0.908123045 0.721628654 1 1.079509156 0.923584763  
 0.629678665 0.776599547 1 0.95966389 0.638836543 0.313778543  
 0.702918145 1 1.015120437 0.520182705 0.310190729 0.446814937 1  
 0.647617494 0.273786928 0.137454789 0.426120322 1 1.084316651  
 0.592524224 1.093721099 1.205905932 0.855131272 1 1.43037183  
 0.548095821 0.847141685 0.740800106 0.389565102 1 0.921954035  
 0.582630316 0.722626003 0.821504369 0.726136953 0.645334878  
 YLR434C YLR434C::YLR434C::molecular\_function unknown 1 1.086866395  
 0.844752724 1.148237848 1.148626184 1 1.077977471 0.932352033  
 0.974159037 1.147841064 1 0.85611794 0.84583578 0.495325259  
 1.007474802 1  
 0.76547566 0.805183334 1.005083048 0.966512306 0.894988297 1  
 0.656116407 0.545191051 0.751240209 1.568412123 0.924002656 1  
 0.980866457 1.154761927 1.39018467 1.233919609 0.795546884 0.736399802  
 YLR436C YLR436C::ECM30::ExtraCellular Mutant 1 1.020901364  
 0.884217452 1.063602726 1 1.234614303 1.181794589 0.727347303  
 0.634455944 1 1.152115922 1.130609313 0.669196008 0.867603803 1  
 1.11031168 0.924747939 1.033315989 0.773123432 1 0.629943975  
 0.932019927 0.539266699 0.362918803 1 0.982850407 0.869732599  
 0.888484761 1.157141466 0.939910731 1 1.034107802 0.679657769  
 1.096983906 1.008338988 0.54251533 1 1.013461023 0.772177714  
 0.91217888 0.661105303 0.979463507 0.653215497  
 YGR291C YGR291C::YGR291C::molecular\_function unknown  
 1.103610089 1.124835429 0.935821462 0.967235425  
 0.847559307 1.177723718 1 0.618903184 1.120469029  
 0.892838967 0.21071422 0.05979237 1 0.832765165  
 0.940287142 1.006227159 1 1  
 1.082248064 1.464180503 1.629193764 1.157574951  
 YGR293C YGR293C::YGR293C::molecular\_function unknown 1 0.99587474  
 0.961338127 0.974110804 0.951582351 1 0.960366402 0.85640757  
 0.936664514 0.975084253 1 1.045313694 0.919266856 1.031399109  
 1.338349099 1 0.729505913 0.774299434 1 1.496551109  
 2.130747582 1.941958528 1 0.718164519 0.811917973 0.664896326  
 0.736290129 0.831480168 1 0.898764447 1.124869128 1.082725227  
 0.948313489 1.46646726 1 0.904287541 1.102312681 0.895498554  
 0.958280764 1.02343639 1.274032958  
 YGR295C "YGR295C::COS6::Protein with strong similarity to other  
 subtelomerically-encoded proteins such as Cos5p, Ybr302p, Cos3p, Cos1p, Cos4p,  
 Cos8p, Cos6p, Cos9p" 1 1.206035941 0.757177423 1.011960057 0.891133404 1  
 1.146537881 0.927263926 0.854552046 1.004416845 1 1.130332866  
 0.95283288 1.386021414 0.935298566 1 1.16735125 0.589471558  
 1.259028383 1.311016561 1 1.075758083 0.757876139 0.999370544  
 1.541007418 1 1.154961136 1.231712893 1.513371747 1.249602236  
 1.251941648 1 0.811663008 1.008042356 1.313627182 0.683843994  
 0.82410624 1 1.19963482 0.989926832 0.955325089 1.050346451  
 1.313355505 1.043743836  
 YHL013C YHL013C::YHL013C::molecular\_function unknown 1 0.794651137  
 0.929623671 0.975356378 1.003009585 1 0.811115669 0.697008037  
 0.959243016 1.155043857 1 0.743748781 0.584964808 1.549668711  
 0.878011948 1 0.589648469 0.339564826 0.841449526 1  
 0.866449105 0.694798258 0.98535135 1.349137027 1 0.874238227  
 0.847982359 0.908719362 0.81243005 1.183755602 1 0.907655173  
 1.094035316 1.094818149 1.300711048 1.861377783 1 0.906260775  
 0.712627256 1.087169953 0.625929756 1.073897241 1.04024128

1

YOL160W      YOL160W::YOL160W::molecular\_function unknown      1      1.233675584  
1.013602844 1.158701547 0.862616281 1      1.045278068 0.900800407  
1.180980672 1.266636341 1      0.938170225 1.06649329 1.181233754  
1.216151948 1      0.728655889 1.790236926 1.348385728 0.540487501 1  
0.490608677 0.498320693 0.491016815 0.508284056 1      1.076176241  
1.04929776 1.132136934 1.453043998 1.321111551 1      0.887708951  
0.817690198 0.818682948 1.224630077 0.65804027 1      0.558449284  
0.519279588 0.632552249 0.468006143 0.543321364 0.710131055  
YHL015W      "YHL015W::RPS20::Homology to rat S20, human S20, Xenopus S22, and E.  
coli S10" 1      1.290560714 1.015215294 0.748421814 1.448377936 1  
1.007285732 0.674199166 0.990660428 1.410478436 1      0.841650073  
0.7341954 0.953668045      1      0.620893569 0.36705725 0.179618296  
0.557865385 1      1.368659918 0.762918828 0.768741168 0.950497062 1  
1.257143991 1.454073008 1.231581918 1.324487945 1.594717397 1  
1.228293529 1.823592251 1.314483316 0.55869811 1.466617017 1  
1.131272368 1.127472862 0.878314578 1.283623008 1.530673365 1.295923537  
YOL162W      YOL162W::YOL162W::molecular\_function unknown      0.972716756  
0.911054414      0.88009312      0.708275854 0.7458014  
0.95652809      0.895784541 1.0725251      1.838154265 0.901648873 1  
1.846219738 2.773195267 2.158479278 4.030175918 1      2.024648869  
3.912357098 5.57746022 3.336490214 1      1.031670754 1.340010377  
1.018491155      1      0.585397471 0.945230708 1.33733101 1.021381036  
1.8973705      1      1.463148006      1.842345851 2.350174829  
YHL017W      YHL017W::YHL017W::molecular\_function unknown      1      1.277836208  
0.847314398 1.176221297 0.837095744 1      1.185607985 1.015714534  
0.829323168 0.896855265 1      1.181834832 0.848905612 0.476603699  
0.915190662 1      0.992031321 0.533567183      0.650630026 1  
0.856008922 0.315146175 0.38637454 0.588582699 1      1.132476105  
1.076839788 0.761855629 1.174476348 0.957233879 1      0.935108209  
0.916265545 1.203682221 0.659771869 0.825776058 1      1.186765978  
1.031084004 0.945584947 0.911835797 0.963542294 0.766171  
YOR010C      YOR010C::TIR2::cold-shock induced protein of the Srp1p/Tip1p family  
of serine-alanine-rich proteins 1      1.402584354 0.972585346  
0.831215596 1      0.991978421 0.940774669 0.796535699 0.903050248 1  
1.247829939 0.943965601 1.22829664 0.914962581 1      0.775788049  
0.683108148 0.881274318 0.761836463 1      0.846945417 0.968407002  
0.710571707 0.720359344 1      1.170807909 0.912222093 1.122723573  
2.902741879 1.831698369 1      0.761136948 0.834088197 0.720620918  
1.875743836 1.732822997 1      0.97758201 1.045776717 0.676461929  
1.288311706 0.821062359 1.181216756  
YHL019C      YHL019C::APM2::homologous to the medium chain of mammalian clathrin-  
associated protein complex 1      1.200874743 1.319296386 1.192938296  
1.280725775 1      1.315689227 1.393443835 1.356210336 1.087273632 1  
1.229572623 1.33269102 1.149827232 1.348606337      1.921928593  
0.928326841 1      0.847580838      1      1.054796179  
1.349570354 1.113854248 1.376215658 1.253599887 1      0.860660354  
0.705186973 1.052636253 1.083653103 0.551387771 1      0.712622884  
0.706897809 0.831178039 0.399190863 1.000759875 0.522747531  
YLR438W      YLR438W::CAR2::ornithine aminotransferase 1      1.38217752  
1.352797128 1.185349503 0.855835832 1      1.652720732 1.850275593  
1.083285105 1.038200624 1      1.845357107 2.036751462 2.730450563  
1.023611984 1      1.467349774      2.070572123 1.085394731  
1      0.881697864 0.712231106 0.864080557 0.826763293  
0.497058027 1      0.634152081 0.593415388 0.87661463 0.547477302  
0.331239204 1      0.805127583 0.588312776 0.652106442 0.373155769  
1.354230284 0.598051217

YOR012W YOR012W::YOR012W::molecular\_function unknown 1.38642922  
 0.961162371 0.873272046 0.783175212 0.871724195 0.860033098  
 1.116958133 1.05441114 0.972945002 0.778479714 1.163891727  
 0.866405256 1 0.932303963 1.280464654 1.308895378 1  
 0.627909237 1.089102641 0.6974603 1 1.175027645 1.060276249  
 1.480410871 0.868076493 1 0.606073669 0.649480145 0.623836581  
 0.594325619 0.987296439 1 0.728985808 0.71228907 0.817293169  
 0.70425491 0.865982943 1.128679366  
 YHL021C YHL021C::YHL021C::molecular\_function unknown 1 1.48682428  
 1.672291569 1.634455514 0.848128888 1 1.753588254 1.925208772  
 1.001638259 0.826830436 1 1.748223714 2.572154438 3.431949741  
 1.147780827 1 5.252634891 5.504484161 6.548733787 2.580575444 1  
 3.787284271 2.241758966 4.864435432 2.575428197 1 1.129721678  
 0.999082143 0.922220347 1.008586491 1.031785794 1 0.910468613  
 0.513332616 1.589920581 0.739727348 1.395127329 1 1.856280786  
 0.69281144 1.336719128 1.101380161 3.911610194 0.854609034  
 YLR452C YLR452C::SST2::Protein involved in desensitization to alpha-factor  
 pheromone 1 1.12540194 0.947735922 1.266587613 1 1.169944538  
 1.176296438 0.753590588 0.665815394 1 1.093926406 0.980842051  
 0.409002565 0.770031159 1 0.643404233 0.457805058 0.514285554  
 0.655285644 1 0.634281166 0.511437483 0.356220305 0.482326529 1  
 0.782167158 0.621052536 0.704658735 0.886717219 0.760027873 1  
 0.835771725 0.574991308 0.690538245 0.693596273 0.422703584 1  
 0.667232174 0.783971064 0.676629164 0.788013303 0.664598619  
 YOR014W YOR014W::RTS1::B-type regulatory subunit of protein phosphatase 2A  
 (PP2A) 1 0.976956671 0.894379188 1.253361601 0.863832488 1  
 1.174800565 1.136840984 1.028529811 0.8816565 1 1.340459813  
 1.212352339 0.840968221 1.16961153 1 0.928372861 0.921760257  
 0.904852697 0.637293629 1 0.831986947 0.550312613 0.583796721  
 0.785308467 1 0.836656776 1.074695531 1.075128503 1  
 0.84005773 0.431963425 0.704366272 0.733667447 0.388484742 1  
 0.803255441 0.726345685 0.93849135 0.544259023 0.628956394 0.751285375  
 YHL023C YHL023C::RMD11::Required for Meiotic nuclear Division  
 1.120471202 0.850697022 0.996268056 0.878135207 0.909460306  
 0.757044888 0.871671924 0.837711859 0.697633905 1.029896473 1  
 1.276413467 1.176437355 0.952332817 0.491278463  
 1 0.907522786 0.94382438 0.853760638 1.177919417 1  
 0.969392552 0.797772315 0.864761899 0.964929557 0.651832108 1  
 0.884649555 1.112367387 1.194524067 1.0108024 0.95530575  
 YHL023C YHL023C::RMD11::Required for Meiotic nuclear Division  
 1 0.561045323  
 1.400943776 2.135431269 4.05413922  
 YLR454W YLR454W::YLR454W::molecular\_function unknown 1 1.607604743  
 1.771074462 1.88166164 1 1.475831742 1.681188644 1  
 1.482451842 1.512092915 2.054886126 1.270107162 0.662669804  
 1 1.235757333 1.395040513  
 1.320281388 1.544932676 1.110504722 1 1.097428562 0.763053553  
 0.965081961 1.045029118 0.68165965 1 0.932194256 0.746290104  
 0.8922615 0.743621132 0.831390217 0.843225912  
 YOR016C YOR016C::ERP4::Emp24p/Erv25p related protein 4 1 1.245977638  
 0.913308133 0.823764588 1.069345554 1 0.904567217 0.875685451  
 0.879657487 1.005390675 1 0.931545266 0.793249519 0.933850003  
 0.920304105 1 0.690386306 0.730087385 0.987985291 1  
 1.178169329 0.842821034 0.984217444 0.899431676 1 1.142807954  
 0.858285225 0.824712457 0.915390961 0.84267544 1 0.740019176

0.819587828 0.567219844 0.552940359 0.832398107 1 0.858403105  
 0.944824527 0.773700432 1.207222487 0.865037171 0.998211347  
 YOR016C YOR016C::ERP4::Emp24p/Erv25p related protein 4  
 1 0.747200208  
 0.796100283 1  
 1.283555676 0.571245842 0.686219854 24.39225808  
 YHL037C YHL037C::YHL037C::molecular\_function unknown 1.071219696  
 0.989632862 0.906525293 0.916879252  
 1.33695435 1 0.640315128 0.909140886 1  
 1.069741701 1.866981546 0.738359419 1 1.137300313 0.997168439  
 1.005528938 1.206609081 1.592453025 1  
 1.458808418 0.988553858 1.563441623 2.823714369 0.95705708  
 YLR456W YLR456W::YLR456W::molecular\_function unknown 1 1.187982893  
 1.616122173 1.331997177 2.144625593 1 1.300851186 1.059752134  
 1 1.178878911 1.258485402 1.815071401 1.447192899 1 1.193819383  
 1.490184583 1.341636105 1.730083912 1 1.833114767 2.965060716  
 2.285655223 1.691630945 1 1.299732665 1.309524674 1.012767928  
 1.238755589 1 0.891127876 1.223368715 1.284829954 1.496205896 1  
 1.226791798 1.499641518 1.258724851 1.549770122 1.666335021 1.321316567  
 YOR018W "YOR018W::ROD1::Resistance to o-dinitrobenzene, calcium, and zinc"  
 0.983798344 0.945218921 1.20647953 0.80862837 1.046069019  
 1.282910157 0.878461724 0.765718032 1.29846569 1.561190241  
 1.05339214 1 2.098885625 1.170370919 1 1.04368348  
 0.981891604 0.525223096 0.667549902 1 1.052328096 1.172866977  
 1.364985499 1.256237893 1.030362017 1.035717551 0.821492565  
 0.874398102 0.968047012 0.576753798 1 0.788067838 0.954435221  
 0.845962696 0.861083675 0.644650699  
 YLR458W YLR458W::YLR458W::molecular\_function unknown 1 0.893539777  
 1.221193207 1.239458167 1.369598864 1 1.014489256 1.150440808  
 1.203509346 1 1.044795192 1.028716415 1.072414457 1.351316342 1  
 1.504777661 1.216931644 1 0.722646449 1.013438684  
 1.094539522 1 0.923543712 1.233454763 1.066248063 1.049456747  
 1.406864672 1 0.39501788 0.588387827 0.639062294 0.891870551  
 0.829656875 1 0.993570393 0.985620919 1.379797123 0.672144631  
 YOR020C "YOR020C::HSP10::Homolog of E. coli GroES protein; regulates Hsp60,  
 the yeast mitochondrial chaperonin, and is thereby involved in protein folding  
 and sorting in mitochondria" 1 0.823194194 1.249284579 0.895932148  
 1.549032769 1 0.708459327 0.93006985 1.622633498 1.356081077 1  
 0.930986371 1.265921633 2.10748542 0.850005782 1 1.416962622  
 1.789159211 2.460528524 1 2.492692344 3.904269079 4.468599296  
 2.549262562 1 1.311414272 1.946673579 1.168668179 0.862535365  
 1.108923038 1 1.33500248 2.907832071 1.117666991 0.657154249  
 1.363580345 1 1.79693689 3.264424149 1.213824722 1.974888655  
 2.554249942 1.473675164  
 YLR460C YLR460C::YLR460C::molecular\_function unknown 1 0.793814376  
 0.837481213 0.804643142 0.463225112 1 0.911846787 0.959332253  
 0.765400754 0.66689121 1 12.88088945 19.6753892 6.812656575  
 1.712037872 1 8.000472416 9.199147447 6.096734208 2.605771407 1  
 7.742444864 8.572063462 5.374008404 2.45184702 1 2.127589712  
 3.143832475 2.22627312 1.166729088 1.095668865 1 3.805246298  
 4.50757429 3.072235926 0.972792638 0.656197016 1 3.632196524  
 3.805444522 2.231672827 0.861471582 0.897589096 2.584841963  
 YOR034C YOR034C::AKR2::Protein involved in constitutive endocytosis of Ste3p  
 1.294082636 0.847280612 1.026458009 0.787091096 1.037593888  
 1.042364519 0.923511095 0.837581575 1.173079924 0.874731982  
 1.178702752 1 0.99017083 0.631090327 1 0.935967965



|             |                                                                                |             |             |             |             |
|-------------|--------------------------------------------------------------------------------|-------------|-------------|-------------|-------------|
| 0.633822152 | 0.542146554                                                                    | 0.359992136 | 1           | 1.055181154 | 0.953012963 |
| 1.133878535 | 1.39394814                                                                     | 0.976559768 | 1           | 0.816250871 | 0.677804211 |
| 0.756880297 | 1.096787841                                                                    | 0.835706435 | 1           | 0.673684188 | 1.011896611 |
| 0.919583523 | 1.307787586                                                                    | 0.682403252 | 0.84847964  |             |             |
| YLR462W     | YLR462W::YLR462W::molecular_function                                           | unknown     | 1           | 0.936834922 |             |
| 0.64410838  | 1.045662104                                                                    | 0.499500749 | 1           | 1.117749736 | 1.166053973 |
| 0.595753557 | 0.533931724                                                                    | 1           | 0.961512216 | 0.868869766 | 0.337460853 |
| 0.805662868 | 1                                                                              | 0.738612732 | 0.555776869 | 0.662019164 | 1           |
| 0.486235575 | 0.38991794                                                                     | 0.393941566 | 0.415974929 | 1           | 1.148074808 |
| 1.140870083 | 1.598021285                                                                    | 1.509696884 | 1.352716095 | 1           | 1.000121682 |
| 0.615282552 | 0.95710952                                                                     | 1.607171405 | 0.654106186 | 1           | 0.574990106 |
| 0.499012636 | 0.806164822                                                                    | 0.553953217 | 0.594715848 | 0.645334878 |             |
| YOR036W     | YOR036W::PEP12::integral membrane protein; c-terminal TMD; located in endosome | 0.96286644  | 0.876889838 | 0.893398682 | 0.768490691 |
| 0.755494288 | 0.732620789                                                                    | 0.90628634  | 0.908206034 | 0.86564377  |             |
| 0.968868781 | 0.810602901                                                                    | 0.5016559   |             |             |             |
|             | 1                                                                              | 1.146655078 | 1.538836679 | 0.850060277 | 0.85105844  |
| 1.013183658 | 1                                                                              | 1.066171338 | 1.283848161 | 1.466238498 | 1.103338726 |
| 1.243931109 | 1                                                                              | 1.355740491 | 1.333861212 | 0.982168515 | 1.49324503  |
| 1.407753052 | 1.242510482                                                                    |             |             |             |             |
| YOR036W     | YOR036W::PEP12::integral membrane protein; c-terminal TMD; located in endosome | 1           | 0.824430581 | 1.15357824  | 0.85028089  |
|             |                                                                                |             | 1.266025335 | 1           |             |
| 0.877834342 | 0.982339902                                                                    | 1.225554323 | 1.065459319 | 1           | 0.904123138 |
| 1.229256576 | 1.634170583                                                                    | 1.042244846 | 1           | 1.501779562 | 1.404851416 |
| 1.32652373  | 2.088274696                                                                    | 1           | 1.838671574 | 3.382904335 | 3.976913448 |
| 1.278019287 | 1                                                                              | 1.217307662 | 1.675575841 | 1.527638804 | 1.090060721 |
| 1.013735949 | 1                                                                              | 1.242517465 | 2.495602372 | 0.66074439  | 1.332454388 |
| 1.69118619  | 3.316253861                                                                    | 1.010038508 | 2.021970526 | 1.501554948 | 1.156699286 |
| YML010W     | YML010W::SPT5::transcription factor                                            | 1           | 0.740067321 | 0.850385767 |             |
| 0.829819165 | 0.447484417                                                                    | 1           | 0.881862674 | 0.911533442 | 0.724190607 |
| 0.494584278 | 1                                                                              | 0.802782047 | 0.771020108 | 0.377992357 | 0.712508603 |
| 0.607254441 | 0.412836317                                                                    | 0.434386753 | 0.473494004 | 1           | 0.784909387 |
| 0.58618377  | 0.653882978                                                                    | 0.974888675 | 1           | 0.751566637 | 0.675227858 |
| 0.801253483 | 0.925129889                                                                    | 0.897311948 | 1           | 0.867587838 | 0.489413462 |
| 0.62328225  | 0.865817745                                                                    | 0.447320373 | 1           | 0.676710518 | 0.434862868 |
| 0.779892246 | 0.503439191                                                                    | 0.670489317 | 0.715384783 |             |             |
| YML012W     | YML012W::ERV25::COPII coat component of certain ER-derived vesicles            | 1           | 1.232595261 | 1.293121708 | 1.015718976 |
|             |                                                                                |             | 1.468097203 | 1           | 1.027130798 |
| 1.192731164 | 1.73450713                                                                     | 1.497466897 | 1           | 0.981895319 | 1.192749005 |
| 1.522122561 | 1.438739096                                                                    | 1           | 1.282738014 | 0.911456751 | 1.04717228  |
| 1.763115719 | 1                                                                              | 1.655643379 | 1.709569798 | 1.916858241 | 1.486354123 |
| 1.035383444 | 1.177628635                                                                    | 1.043599669 | 1.006210032 | 1.031277432 | 1           |
| 0.91353876  | 1.272822494                                                                    | 0.906182869 | 0.766264874 | 1.157003407 | 1           |
| 1.235886031 | 1.268429311                                                                    | 1.161397319 | 1.476504172 | 1.225655804 | 1.418510884 |
| YML014W     | YML014W::YML014W::molecular_function                                           | unknown     | 1           | 0.980065598 |             |
| 0.980508905 | 1.064727405                                                                    | 0.972238923 | 1           | 0.956083113 | 0.994072967 |
| 1.079653558 | 1.169437432                                                                    | 1           | 1.012747909 | 1.042680881 | 0.995092232 |
| 1.160139802 | 1                                                                              | 0.844577736 | 1.858513569 | 1.700112904 | 0.746644456 |
| 0.577950995 | 0.402106345                                                                    | 0.31556527  | 0.325919019 | 1           | 0.982404231 |
| 0.920102127 | 0.93473592                                                                     | 1.135089898 | 1.055121406 | 1           | 1.049702934 |
| 0.751926661 | 0.860922661                                                                    | 0.986351619 | 0.583143797 | 1           | 0.899107958 |
| 0.683195491 | 0.826649143                                                                    | 0.886551455 | 0.883257793 | 0.603304945 |             |
| YHL039W     | YHL039W::YHL039W::molecular_function                                           | unknown     | 1           | 1.122428242 |             |
| 0.80968428  | 0.76421947                                                                     | 0.76555026  | 1           | 0.840392584 | 0.732187324 |
| 0.781949858 | 1                                                                              | 0.766225622 | 0.613072072 | 0.601603142 | 0.734282883 |
| 0.676266098 | 0.461907084                                                                    | 0.524225273 | 0.563152873 | 1           | 0.843701964 |
| 0.685540245 | 0.659502512                                                                    | 0.648974841 | 1           | 0.938395913 | 0.765064529 |

1.006755329 0.840427322 1 0.824915017 0.794908158 0.623367088  
0.739694611 0.870534802 1 0.762643857 0.68667847 0.692499437  
0.507662418 0.801195979  
YHL039W YHL039W::YHL039W::molecular\_function unknown  
1  
2.165378822  
1.146868587  
YHL041W YHL041W::YHL041W::molecular\_function unknown  
1  
1.213617287 0.801317613 1 0.627960358 0.449680884  
1  
0.568138 0.900885047  
YHL043W YHL043W::ECM34::ExtraCellular Mutant 0.854513185  
0.808560756 0.758102958 0.869324483 0.754283575 0.783146365  
0.821487606 0.954049996 1.001880156 1.126468666 1.042623341 1  
2.068605233 1.943138781 2.011338967 1 2.632205406  
1.997514909 1.948782558 1 1.397828908 1.348225796 1.237458294  
1.145538413 1.046501742 1 0.875167505 1.091775548 0.9090363  
1.159327916 1 1.111828414 1.111121549 1.057232714 1.56675598  
YHL045W YHL045W::YHL045W::molecular\_function unknown 1 1.126798523  
0.833478685 1.074808313 0.918459068 1 1.053909267 1  
1.346495764 1.342218562 1.033035098 1.19379546 1 0.719565778  
0.737723264 0.553191942 0.679466239 1 0.883106999 2.015310161  
0.827439076 0.671061467 0.780500039 0.886055876 0.87745162 1  
0.688663272 0.833355556 0.720857712 1.176082575 1 0.473640465  
1.121440597 0.974569543  
YOR038C YOR038C::HIR2::Involved in cell-cycle regulation of histone  
transcription 1 1.251230084 1.199222568 1.00064299 1  
1.200119221 1.217998695 0.952788418 1 1.007353399 1.049706069  
0.881939358 1.120510313 1 0.732785095 0.860050795 1  
1 0.796534527 0.870854955 0.9276073 1.170116001  
1.03853343 1 1.005912541 0.879664072 0.963435046 1  
0.382845719 0.431284299 0.410915763 0.390306568 0.278456618 0.729394796  
YHL047C YHL047C::ARN2::Siderophore transporter for triacetylfulvarinine C 1  
1.076808423 0.745704321 1.043380655 0.790178765 1 1.161696508  
0.949314723 0.834608114 0.914778144 1 1.478240333 1.944545123  
2.254466821 1.593296731 2.881268929 2.499329589  
1.800966408 1.101445731 1 2.849277505 8.137897527  
13.20672088 1.633109105 2.456739063 1 3.698668068 12.87883339  
33.25580558 13.3007286 0.884357541 1 5.438818687 15.92670128  
0.695533116 0.700456333 1.413257103  
YOR040W YOR040W::GLO4::Mitochondrial glyoxylase-II 1 0.777891146  
0.904011805 0.919711675 0.92672196 1 0.798429157 0.904581626  
1.059943544 1.10555028 1 0.953340371 1.227989699 1.333912212  
1.309285127 1 1.181993827 1.1059915 1.264488418 1  
1.975491846 2.222659158 2.295543717 1.831818576 1 1.091637257  
1.347426019 1.672607523 1.182001076 1.133764233 1 1.075626954  
1.319299276 1.739393384 1.67623609 1.051199514 1 0.851288009  
1.123593112 0.992038786 0.835242504 0.881370285 1.04199261  
YHR011W YHR011W::DIA4::protein similar to bacterial seryl-tRNA synthases 1  
1.090064665 1.054587711 0.970420174 1 1.135839599 1.220898375  
1.132799169 1.034474998 1 1.012635994 1.091946278 1.363329445  
1.084263087 1.500314181 0.835346565 1.117866371 1  
1.25374565 1.259304547 1.0192355 1.005383438 1 1.11290285  
1.201730648 1.052419008 0.753989695 0.98205127 1 1.512924161

1.791796805 1.376922417 1.144148692 2.122056365 1 1.299148747  
1.29994823 0.909164397 1.062808187 0.865992156  
YOR042W YOR042W::CUE5::Hypothetical ORF 1 1.092405217 1.420557496  
1.031593819 1.003407017 1 1.211878585 1.292380602 1.214044733  
0.973998158 1 1.229633359 1.684330729 1.94946095 1.108595677 1  
1.275943722 0.798799967 1.022241154 1.199932311 1 1.87165956  
1.374262786 1.740480317 1 0.879266741 1.152437554 1.207640208  
0.99367647 1.119965935 1 0.958048306 1.369084153 1.375367832  
1.395215289 1.158417975 1 0.87266049 0.84301676 0.99245432  
0.930179652 1.048420027 1.205734225  
YHR013C YHR013C::ARD1::subunit of the major N alpha-acetyltransferase;  
complexes with Nat1p 1 1.145508172 1.246118211 1.001670475 1.501862734 1  
0.999570311 1.093595543 1.26369488 1.389356743 1 1.077072  
1.111758495 1.180752961 1.026595429 1 1.261751607 0.727875939  
0.697389435 1.394079857 1 1.271753201 1.361867697 1.182088035 1  
1.198987373 1.351677344 1.02278066 0.890140959 1.042768509 1  
1.027314218 1.767304967 1.401804424 1.124293154 1.652594589 1  
1.084824342 1.360567463 1.034870167 1.389841897 1.077512081 1.140938049  
YML016C YML016C::PPZ1::may play a role in regulating osmotic stability 1  
0.800434611 0.779384629 0.894907389 0.929027439 1 1.034275432  
0.824691508 1 0.79852609 0.760161114 0.659454414 0.782733618 1  
1.107944914 0.816868559 1.002684142 0.843596687 1 0.557759142  
0.754587487 0.842180536 0.811506298 1 1.231783762 1.068508317  
1.100768222 1.105793604 0.948479741 1 1.003068977 0.669703331  
0.941747847 0.684246343 0.560082288 1 1.070321333 0.902368723  
0.893915622 0.862791477 0.916493738 0.786310354  
YOR044W YOR044W::YOR044W::molecular\_function unknown 1 0.881076788  
0.958244001 0.780432955 1.067589123 1 0.773654616 0.770505301  
1.074070682 1.058921007 1 1.080255422 0.752219812 1.237322079  
1.203755021 1 0.897780603 0.590093075 0.777659825 1.36683204 1  
1.543373162 1.265171368 1.799832568 1.887592064 1 1.223047679  
1.200432746 1.256739583 1.514310281 1.81424839 1 0.92030214  
0.98500553 1.311728572 1.625768597 2.312103619 1 0.973746346  
1.354130842 1.167602434 2.131293242 1.138311158  
YHR015W "YHR015W::MIP6::RNA-binding protein, interacts with MEX67" 1  
1 1.265484958 1.366576518 1  
1.475421046  
0.960941771 0.855052547 0.843622188 0.975372371  
1.103842588 1 0.892551969 0.854237812  
YHR015W "YHR015W::MIP6::RNA-binding protein, interacts with MEX67"  
1  
0.711126443 0.723410824 0.770054168 0.768254449 0.869396375  
0.772712694 0.861654413 0.964248555 0.980055239 1 1.307072856  
1.133858536 1.077195388 1.086156813  
YML019W YML019W::OST6::Putative new 37kDa subunit of N-  
oligosaccharyltransferase complex 1 1.321548159 0.981241315 0.807277483  
1.04213518 1 1.022996521 0.752489574 0.969408491 0.810754165 1  
0.95303699 0.855621343 0.642510254 0.833209233 1 0.526719836  
0.322764523 0.279660254 0.524884172 1 1.269252019 1.033997459  
1.306341009 1 1.041839897 1.053370729 1.05240576 1.154346398  
0.978335668 1 0.885004861 0.993096841 0.872047514 0.717302578  
1.028368433 1 1.006774585 0.89628875 0.92289213 1.150752413  
0.971701882 1.141813714  
YOL033W YOL033W::MSE1::Mitochondrial glutamyl-tRNA synthetase 1  
1.0149673 0.893304081 1.484459899 0.949908167 1 1.381198557

|             |                                                                               |             |             |             |             |             |
|-------------|-------------------------------------------------------------------------------|-------------|-------------|-------------|-------------|-------------|
| 1.316781614 | 1.074176684                                                                   | 1.064043282 | 1           | 0.862622216 | 0.767340924 |             |
| 0.7015201   | 1.087533872                                                                   | 1           |             | 0.457777742 | 0.566728544 |             |
| 0.943826661 | 1.51172565                                                                    | 1.145338347 | 1           | 0.942691626 | 0.948916299 |             |
| 1.042657519 | 1.182505789                                                                   | 1.137763646 | 1           | 1.047856927 | 0.961615227 |             |
| 0.940223367 | 0.662801321                                                                   | 0.959527019 | 1           | 1.199600773 | 1.099489708 |             |
| 0.996778623 | 1.03085403                                                                    | 1.383859633 | 0.873872775 |             |             |             |
| YHR017W     | YHR017W::YSC83::similar to <i>S. douglasii</i> YSD83                          |             |             |             | 1           | 1.39906932  |
| 1.247734028 | 1.158365404                                                                   | 1.449186922 | 1           | 1.320373127 | 1.232714734 |             |
| 1.30367076  | 1.492806597                                                                   | 1           | 1.293386737 | 1.235418876 | 1.246204834 |             |
| 1.172050775 | 1                                                                             | 1.040225259 | 0.817037286 | 0.679673057 | 0.722413837 |             |
| 0.823374375 | 1.089170218                                                                   | 0.667426129 | 0.670002411 | 1           | 1.226036713 |             |
| 1.029969466 | 1.366612163                                                                   | 1.249077419 | 1.149752331 | 1           | 1.111440054 |             |
| 1.093844915 | 0.673630356                                                                   | 0.933858008 | 0.964907953 | 1           | 0.979235534 |             |
| 1.007489909 | 0.819576557                                                                   | 1.129101644 | 0.71194564  | 1.179465531 |             |             |
| YOL035C     | YOL035C::YOL035C::molecular_function unknown                                  |             |             |             | 1           | 1.070709959 |
| 1.85887919  | 1.155280437                                                                   | 2.249028049 | 1           | 0.982536869 | 1.620750624 |             |
| 2.076401248 | 1                                                                             | 1.220217611 | 1.210084564 | 2.177283953 | 1.333167241 |             |
| 0.790147174 | 0.724848407                                                                   | 0.834855522 | 0.91305028  | 1           | 1.298218504 |             |
| 3.540922406 | 2.123076406                                                                   | 1.148509243 | 1           | 0.942467993 | 0.771126705 |             |
| 0.659710869 | 0.696707919                                                                   | 0.784071707 | 1           | 1.34134933  | 1.479728433 |             |
| 0.877439116 | 0.804151207                                                                   | 1.60299561  | 1           | 1.162433838 | 1.515449668 |             |
| 1.347477783 | 1.992079655                                                                   | 1.57443468  | 1.333575354 |             |             |             |
| YHR019C     | YHR019C::DED81::Asparaginyl-tRNA synthetase                                   |             |             |             | 1           | 1.068129523 |
| 0.755615671 | 0.853820449                                                                   | 0.529294096 | 1           | 1.167810196 | 1.047786103 |             |
| 0.698284984 | 0.658623167                                                                   | 1           | 0.976392833 | 0.887882882 | 0.409386779 |             |
| 0.703017901 | 1                                                                             | 1.150013476 | 0.751861962 | 0.557738484 | 0.713814394 |             |
| 0.677132976 | 0.355047023                                                                   | 0.253916073 | 0.452271685 | 1           | 1.081459976 |             |
| 0.826309188 | 0.93053536                                                                    | 1.157095081 | 0.904348725 | 1           | 0.921323429 |             |
| 0.634066137 | 0.394322063                                                                   | 0.483323396 | 0.567366847 | 1           | 1.068098128 |             |
| 0.876070466 | 0.889806331                                                                   | 0.872572352 | 0.774896553 | 0.830967177 |             |             |
| YML040W     | YML040W                                                                       |             |             |             | 1           | 0.662666236 |
| 1.135723632 | 1.094568517                                                                   | 0.88732924  | 0.719594144 | 1           | 1.455449663 |             |
| 1.447193211 | 0.47366678                                                                    | 1.148906341 | 1           | 1.049212729 | 1.574723365 |             |
| 1.028381013 | 0.873162322                                                                   | 1           | 0.356027576 | 0.336746698 | 0.397426447 |             |
| 0.536576865 | 1                                                                             | 0.750501379 | 1.032463965 | 1.341405358 | 1.3682012   |             |
| 0.762111555 | 1                                                                             | 1.89900427  | 1.699199694 | 4.690947855 | 6.279388989 |             |
| 2.009603428 | 1                                                                             | 0.866487151 | 1.518174158 | 1.861543673 | 1.208798032 |             |
| 0.405657362 | 0.956181415                                                                   |             |             |             |             |             |
| YOL037C     | YOL037C::YOL037C::molecular_function unknown                                  |             |             |             | 1           | 1.022699781 |
| 0.994738982 | 1.404785006                                                                   | 1.144930449 | 1           | 1.0968136   | 1.255862061 |             |
| 1.072799661 | 1.034312205                                                                   | 1           | 1.18552569  | 1.134127001 | 0.885034395 |             |
| 1.184894001 | 1                                                                             | 0.455220198 | 0.582796757 | 0.593902611 |             |             |
| 0.669813155 | 1.173984176                                                                   | 0.82730895  | 1           | 0.839772144 | 0.682966345 |             |
| 0.794346131 | 0.979551181                                                                   | 0.802028505 | 1           | 1.052163215 | 0.643647317 |             |
| 0.753458438 | 1.057112761                                                                   | 0.699694951 | 1           | 0.898386428 | 0.686576247 |             |
| 1.192043442 | 0.643447501                                                                   | 1.030656746 | 0.837972183 |             |             |             |
| YML042W     | "YML042W::CAT2::Carnitine O-acetyltransferase, peroxisomal and mitochondrial" |             |             |             | 1           | 1.378826431 |
| 1.249080223 | 1.255795101                                                                   | 1.34314875  | 1           | 1.095306622 | 1.332811268 |             |
| 2.00930443  | 1.435858791                                                                   | 0.539815264 | 1.267417239 | 0.986089393 |             |             |
| 0.308504238 | 0.610617178                                                                   | 0.297874704 | 1           | 1.14663502  |             |             |
| 1.234748378 | 1.112805059                                                                   | 0.96247271  | 1           | 0.793998861 | 1.269680723 |             |
| 1.180480308 | 0.887764378                                                                   | 0.905376531 | 1           | 1.407084207 | 1.602660891 |             |
| 1.137849651 | 1.1887591                                                                     | 1.34631056  | 1.218868573 |             |             |             |
| YOL039W     | "YOL039W::RPP2A::Homology to rat P2, human P2, and E.coli L12eIB"             |             |             |             | 1           |             |
| 1.279778806 | 1.358871816                                                                   | 0.787416684 | 1.056969642 | 1           | 0.998967018 |             |
| 1.15974491  | 1.061688559                                                                   | 1.182300636 | 1           | 1.012427334 | 0.934709265 |             |

|             |                                                                                                               |             |             |             |             |
|-------------|---------------------------------------------------------------------------------------------------------------|-------------|-------------|-------------|-------------|
| 1.055139601 | 0.80776006                                                                                                    | 1           | 0.826149337 | 0.344775634 | 0.21958414  |
| 0.290742438 | 1                                                                                                             | 1.249767584 | 0.929429824 | 0.312451403 | 0.423928595 |
| 1.01072898  | 0.789713789                                                                                                   | 0.783172604 | 1.135320604 | 1.153812716 | 1           |
| 1.16633859  | 0.80104267                                                                                                    | 0.666749751 | 0.58123828  | 0.592336574 | 1           |
| 0.889938427 | 0.578213332                                                                                                   | 0.752118463 | 0.829384777 | 0.720215272 | 1.053375628 |
| YML045W     | YML045W                                                                                                       | 1           | 0.859440733 | 0.767147385 | 1.408885555 |
| 0.756425422 | 1                                                                                                             | 0.889938427 | 0.578213332 | 0.752118463 | 0.829384777 |
| 1.123932292 | 1.114610987                                                                                                   | 0.895677055 | 0.732389169 | 1           | 1.492584768 |
| 1.420872839 | 0.461105825                                                                                                   | 1.171983192 | 1           | 0.811066936 | 1.2700203   |
| 0.90255638  | 0.861607138                                                                                                   | 1           | 0.411099066 | 0.299162513 | 0.398078801 |
| 0.64652258  | 1                                                                                                             | 0.605647765 | 0.87863581  | 1.369512895 | 1.077859098 |
| 0.450922556 | 1                                                                                                             | 1.303394454 | 1.648739185 | 4.203069113 | 7.127162468 |
| 2.438702319 | 1                                                                                                             | 0.921482513 | 1.541043788 | 1.024440797 | 1.236709902 |
| 0.965539804 | 0.818708442                                                                                                   |             |             |             |             |
| YOL041C     | YOL041C::NOP12::Nucleolar Protein; isolated as a mutant exhibiting synthetic lethality with a nop2 ts allele. | 1           | 1.149886114 | 1.074740105 |             |
| 1.487229373 | 1.791157032                                                                                                   | 1           | 1.173887706 | 1.35958124  | 1.380849962 |
| 1.59312719  | 1                                                                                                             | 0.636393604 | 0.624689879 | 0.598136553 | 1.311775285 |
| 0.170602377 | 0.209207596                                                                                                   | 0.294636016 | 0.457619064 | 1           | 0.519823341 |
| 1.124289147 | 0.986271392                                                                                                   | 0.716582099 | 1           | 0.594640167 | 0.62513578  |
| 0.578878955 | 0.60470524                                                                                                    | 0.728718067 | 1           | 0.735753243 | 0.8969351   |
| 0.632533626 | 1.080684154                                                                                                   | 1.334562825 | 1           | 0.650536221 | 0.918078395 |
| 0.950743616 | 1.282570936                                                                                                   | 0.67765019  | 0.943047067 |             |             |
| YOL043C     | YOL043C::NTG2::Endonuclease III-like glycosylase                                                              | 1           |             |             |             |
| 1.797505251 | 1.97134533                                                                                                    | 1.594205224 | 1.813868436 | 1           | 1.521733943 |
| 1.551757486 | 1.723427528                                                                                                   | 1.845019415 | 1           | 1.458553048 | 1.89278927  |
| 1.381452013 | 1.510263056                                                                                                   | 1           | 0.984869078 | 0.892343177 | 1.68288907  |
| 1.455698796 | 2.065767932                                                                                                   | 0.988560924 | 0.852489488 | 1           | 0.966617156 |
| 1.026238149 | 0.922210422                                                                                                   | 0.866500029 | 1.109798052 |             | 0.954207789 |
| 1.079502092 | 0.841526023                                                                                                   | 1.561828867 | 1           | 1.051592172 | 0.90789881  |
| 1.012218699 | 1.090738885                                                                                                   | 1.221991659 | 1.159326177 |             |             |
| YML047C     | YML047C::PRM6::pheromone-regulated membrane protein                                                           | 1           |             |             |             |
| 1           | 1                                                                                                             |             |             |             |             |
|             |                                                                                                               |             |             | 0.302223249 |             |
| 0.902737461 |                                                                                                               | 0.990362488 | 1           | 0.749500453 |             |
| 1.339180817 | 1.266697826                                                                                                   | 0.572683113 | 1.028595205 | 1.111414314 |             |
| 0.95530575  |                                                                                                               |             |             |             |             |
| YML049C     | YML049C::RSE1::RNA splicing and ER to Golgi transport                                                         | 1           |             |             |             |
| 1.207265955 | 1.070020475                                                                                                   | 1.351141319 | 1.027370243 | 1           | 1.342747971 |
| 1.423530072 | 0.997187651                                                                                                   | 1.049784476 | 1           | 1.131389133 | 1.520394564 |
| 0.800262721 | 1.05256119                                                                                                    | 1           | 0.969591585 | 1.132443871 | 0.470168955 |
|             | 1.212601866                                                                                                   |             | 1           | 0.870190167 | 1.509186119 |
| 0.92348639  | 0.727235878                                                                                                   |             | 1.161042799 |             | 1           |
| 0.881367002 | 0.585533834                                                                                                   | 1.139098613 |             | 13.40843007 |             |
| YML049C     | YML049C::RSE1::RNA splicing and ER to Golgi transport                                                         |             |             |             |             |
|             |                                                                                                               |             |             | 1           | 0.957229556 |
| 0.907629609 | 1.097032284                                                                                                   | 1.100042138 | 1.003735698 | 1           | 1.135147055 |
| 0.909745265 | 0.900740427                                                                                                   | 0.874059809 | 0.668547027 | 1           | 0.922840746 |
| 0.952762206 | 0.989011422                                                                                                   | 0.925147097 | 0.778646182 | 0.828340286 |             |
| YML051W     | YML051W::GAL80::inhibits transcription activation by Gal4p in hte absence of galactose                        | 1           | 1.528711078 | 1.263716166 | 1.328659182 |
| 1.340640293 | 1                                                                                                             | 1.448348716 | 1.596350884 | 1.419108486 | 1.071211741 |
| 1.53540468  | 1                                                                                                             | 1.451299053 | 1.212665186 | 1.158086498 | 1           |
| 0.946959374 | 0.747620969                                                                                                   | 0.826616619 | 0.591001887 | 1           | 0.597944929 |
| 0.604573551 | 0.584847631                                                                                                   | 0.636467947 | 1           | 1.103304954 | 0.911473625 |
| 1.142487184 | 1.020517182                                                                                                   | 0.726996199 | 1           | 0.999392845 | 1.247237143 |
| 0.921609961 | 0.985361251                                                                                                   |             |             |             |             |

0.899100566 1 0.930367229 1.129926231 1.096471468 0.965174269  
 0.859364728 0.873872775  
 YML068W YML068W::ITT1::Inhibitor of Translation Termination 1  
 1.344823879 1.32928211 1.353319158 1.641949441 1 1.295450625  
 1.419449426 1.614702314 1.482405905 1 1.224660503 1.535922567  
 1.446819992 1.333175919 1 0.835571992 0.98508975 0.720216765  
 0.914742966 1 1.420611903 1.811598019 1.734851446 1.25843292 1  
 1.185710415 1.242212283 0.98169684 0.858617736 1.210957175 1  
 1.198161823 1.136404086 1.719062503 1 1.241620854  
 1.093955193 1.082920693 1.428771667 0.924658939  
 YHR021C YHR021C::RPS27B::Homology to mammalian S27 1 1.247438443  
 1.3309715 0.768998981 1.466942271 1 1.056649857 0.975334775  
 1.244314774 1.004492843 1 0.724209112 0.778083725 1.007137059  
 0.821376658 1 0.811602568 0.289948857 0.208194781 0.619262328 1  
 1.849050862 1.15739699 0.736306439 0.636639311 1 0.873554403  
 0.760681069 0.413247593 0.783619358 0.796193774 1 1.226144943  
 1.959252435 0.943030197 0.720321605 1.965007445 1 1.01347369  
 1.396127717 0.897805706 2.145640991 1.010165957 1.407127762  
 YHR035W YHR035W::YHR035W::molecular\_function unknown 1 1.105733622  
 1.252418374 1.247856501 1 1.231349275 1.254536293 1.388184924  
 1.191726551 1 1.002823696 1.152292142 1.490962477 1.327150704 1  
 0.796115246 0.798522846 1.127314688 1.450577529 1 1.33339296  
 3.124781708 1.399315542 1.238186555 0.78975258 0.825599711  
 0.673887438 0.715531566 0.865969133 1  
 1.095938013 1.090523625 1.108448591 0.600434876 2.19343822  
 YHR035W YHR035W::YHR035W::molecular\_function unknown  
 1 1.256787964  
 1.05867742 0.974737396 1.183228367 0.987530543 1 0.844724694  
 0.832462896 0.401301532 0.415364424 0.839927687 1 0.78518086  
 0.767614732 0.654267864 1.165541416 0.590548617 0.954430189  
 YHR037W YHR037W::PUT2::delta-1-pyrroline-5-carboxylate dehydrogenase 1  
 0.675721501 0.813880088 0.974181755 0.733029173 1 0.975073451  
 1.085522345 0.862707908 0.799059168 1 0.750421868 0.997781045  
 0.852350159 0.87722467 1 1.158998861 1.064765917 1.10347601  
 1.270931017 1 1.322272307 1.319354642 1.135860201 1.402430512 1  
 1.038562785 1.025869813 1.111844875 1.088635869 1.13064621 1  
 0.9174432 1.032294374 1.020226295 1.200542283 1 0.984702921  
 1.205774804 0.853637746 1.162987084 0.958329747 1.679446817  
 YER042w YER042w::MXR1::peptide Methionine sulfoxide Reductase 1 1  
 1.463566559 1.51754874 0.897577206 1.548749373 1 1.097093992  
 0.966018986 1.278310042 1.241613954 1 1.089905705 1.341821602  
 1.521063016 0.778565127 1 1.990233392 1.209747584 1.046046473  
 1.165703406 1 1.611008977 1.556473917 1.362824166 0.912029223 1  
 0.923582646 0.772282985 0.39375329 0.887220992 0.765806599 1  
 1.451127361 1.402107355 0.609506927 0.880379561 2.691974196 1  
 1.482678498 1.493342078 0.724715905 2.089143348 1.036562288 2.02531828  
 YHR040W YHR040W::YHR040W::molecular\_function unknown 1 1.123906142  
 1.196241646 0.975079252 1.064981578 1 1.017155502 1.043711365  
 1.308633383 1.319237899 1 0.929242407 0.839693866 1.08338187  
 1.1954339 1 0.602539643 0.432136773 0.941313782 1  
 0.914616268 1.125987456 0.835649448 0.809987838 1 0.913021545  
 1.258005787 0.744436407 0.781060072 1.014454097 1 1.045365431  
 1.263576833 0.963495566 1.462393828 1.334029046 1 1.211841731  
 1.125818641 1.091298324 1.255186242 1.214033024 0.979823219  
 YHR040W YHR040W::YHR040W::molecular\_function unknown

|                           |                                                               |             |             |             |             |               |
|---------------------------|---------------------------------------------------------------|-------------|-------------|-------------|-------------|---------------|
|                           |                                                               |             |             |             | 1           | 1.197296455   |
|                           | 1.074483849                                                   | 1.293232982 | 1.165034879 | 1.087053874 | 1           | 1.04879752    |
|                           | 1.316795994                                                   | 0.8267748   | 0.857596411 | 1.092549542 | 1           | 0.996564044   |
|                           | 1.036442104                                                   | 0.738114501 | 1.129018999 | 0.646728069 | 1.629536213 |               |
| YER045c                   | YER045c::ACA1::contains an ATF/CREB-like bZIP domain;         |             |             |             |             |               |
| transcriptional activator | 1                                                             | 0.870678077 | 0.933382474 | 1.094852835 |             |               |
|                           | 0.878338258                                                   | 1           | 1.011322254 | 1.07741594  | 0.936931064 | 0.856704532 1 |
|                           | 1.096418954                                                   | 1.009859794 | 0.885422386 | 0.932133079 | 1           | 1.006274614   |
|                           | 0.594585506                                                   | 0.870858207 | 0.886917408 | 1           | 0.923268258 | 1.814378089   |
|                           | 0.615231747                                                   | 0.475076344 | 1           | 0.972595935 | 1.122755249 | 1.05070676    |
|                           | 1.124942653                                                   | 1.142501126 |             | 0.80966377  | 0.918854624 | 1.123130399   |
|                           | 1.038248873                                                   | 0.825574607 |             | 0.897658064 | 1.12714894  | 1.083667484   |
|                           | 0.751738129                                                   | 0.624319912 |             |             |             |               |
| YHR042W                   | YHR042W::NCP1::NADP-cytochrome P450 reductase 1 1.330983532   |             |             |             |             |               |
|                           | 0.954234664                                                   | 1.010935735 | 0.640681482 | 1           | 1.308759883 | 1.204976394   |
|                           | 0.754350127                                                   | 0.735880395 | 1           | 1.727406503 | 1.299408786 | 0.727187307   |
|                           | 0.946228106                                                   | 1           | 1.478081317 | 0.988016379 | 0.647017803 | 0.567952016 1 |
|                           | 0.780804076                                                   | 0.580115195 | 0.415382492 | 0.439963463 | 1           | 0.99908543    |
|                           | 0.868634879                                                   | 0.822885547 | 0.946360838 | 1.143398026 | 1           | 1.128028732   |
|                           | 1.71497769                                                    | 1.55878074  | 1.654695494 | 2.16580636  | 1           | 1.06230247    |
|                           | 1.101672582                                                   | 1.287108378 | 1.392459279 | 0.851054362 | 1.376480951 |               |
| YER047c                   | YER047c::SAP1::interacts with Sinlp 1 0.637586222 0.659382746 |             |             |             |             |               |
|                           | 0.864178281                                                   | 0.696083872 | 1           | 0.85151597  | 0.921060115 | 0.616980138   |
|                           | 0.649573651                                                   | 1           | 0.736116716 | 0.706434313 | 0.419963007 | 0.78121878 1  |
|                           | 0.93717702                                                    | 0.669084728 | 1.052090293 | 0.696125949 | 1           | 1.22023894    |
|                           | 1.461980184                                                   | 0.520116891 | 0.790979747 | 1           | 0.989703073 | 1.077209012   |
|                           | 1.011693597                                                   | 0.98593043  | 1           | 0.950406977 | 0.816494503 | 0.925875129   |
|                           | 1.021252174                                                   | 0.753438875 | 1           | 0.801710362 | 0.869243907 | 1.081274459   |
|                           | 1.000420302                                                   | 0.985308447 | 0.852857756 |             |             |               |
| YHR044C                   | YHR044C::DOG1::2-deoxyglucose-6-phosphate phosphatase 1       |             |             |             |             |               |
|                           | 1.281727891                                                   | 1.367376649 | 1.168492765 | 1.70684861  | 1           | 1.102990675   |
|                           | 1.10174685                                                    | 1.685960439 | 1.49440501  | 1           | 1.020011312 | 1.271430602   |
|                           | 1.964649313                                                   | 1.28943915  | 1           | 1.893363386 | 1.490458497 | 1.68906536    |
|                           | 2.947043603                                                   | 1           | 1.819295953 | 2.722053169 | 2.366663601 | 1.579117803 1 |
|                           | 1.035270544                                                   | 2.255807867 | 1.398627872 | 0.637512296 | 1.019512498 | 1             |
|                           | 1.0508003                                                     | 3.622312952 | 2.910094325 | 2.13599033  | 2.409052281 | 1             |
|                           | 1.738903263                                                   | 3.715454963 | 1.631371383 | 1.914351524 | 2.110955182 | 1.323943457   |
| YHR044C                   | YHR044C::DOG1::2-deoxyglucose-6-phosphate phosphatase         |             |             |             |             |               |
|                           | 0.677718946                                                   | 0.788462529 | 1           |             |             | 1             |
|                           | 0.867041743                                                   | 1.00600979  | 0.810524817 | 0.84596758  | 0.644738152 | 3.133858293   |
| YML070W                   | YML070W::DAK1::putative dihydroxyacetone kinase 1 0.866056777 |             |             |             |             |               |
|                           | 0.901284226                                                   | 1.25880435  | 0.822231427 | 1           | 1.007302813 | 1.231121107   |
|                           | 1.263583088                                                   | 1.512561431 | 1           | 0.905261391 | 1.237860405 | 1.714398835   |
|                           | 1.705511418                                                   | 1           | 2.302037215 | 2.110684466 | 3.176443917 | 2.365023678 1 |
|                           | 2.006848925                                                   | 1.523990134 | 2.309863469 | 2.41705121  | 1           | 1.099229548   |
|                           | 1.409062775                                                   | 1.937885717 | 1.2886178   | 0.961162192 | 1           | 1.006896726   |
|                           | 0.987653682                                                   | 1.418882786 | 1.124426998 | 0.465104704 | 1           | 1.069072716   |
|                           | 1.01433295                                                    | 1.151829686 | 0.642530526 | 0.918171715 | 0.604180558 |               |
| YER049w                   | YER049w::YER049W::molecular_function unknown 1 0.831672035    |             |             |             |             |               |
|                           | 0.639305707                                                   | 0.97324564  | 0.692377292 | 1           | 0.93162258  | 0.719879808   |
|                           | 0.747476795                                                   | 1.015928974 | 1           | 0.660143251 | 0.569646161 | 0.382131307   |
|                           | 0.893408339                                                   | 1           | 0.550886431 | 1.459391773 | 1.13932427  | 0.337210075 1 |
|                           | 0.557281382                                                   | 0.377912123 | 0.218451439 | 0.342774103 | 1           | 0.948171429   |
|                           | 0.647382844                                                   | 0.73621955  | 1.150850742 | 0.906760881 | 1           | 0.896127077   |

0.582251811 0.443112375 0.732527737 0.701426156 1 0.731877706  
 0.620751949 0.786242928 1.024129687 0.578854906 1.015723811  
 YHR058C YHR058C::MED6::RNA polymerase II transcriptional regulation mediator  
 0.998573744 1.171816983 0.73912159 0.991586239  
 1.097283632 1.068040398 1.159817999 1.021754644 0.73035375  
 1.311845293 1 0.544778274 0.637021327 0.70242759 0.817621176 1  
 1.002052351 1.142498318 1.363069305 1 1.045789887 1.106225908  
 0.982100476 1.259840179 0.967269286 1 0.796002779 0.809834014  
 0.739371179 0.71181933 0.690001144 1 0.854142877 0.881277329  
 1.019515081 0.543519644 0.765029552 0.616439293  
 YML072C YML072C::YML072C::molecular\_function unknown 1 0.877485453  
 0.826648979 1.103069621 0.623027773 1 1.134117953 1.239100629  
 0.710254027 0.603448063 1 1.225957801 1.116694774 0.49458088  
 0.796699697 1 1.105979583 1.058582815 1.292188092 0.496910149 1  
 0.472648208 0.441789319 0.248585682 0.447068167 1.226855629  
 0.861495326 0.827999943 0.586562513  
 1.29421843 1.740480101 1.09691098 1.18232286 0.581155912  
 16.75331348  
 YML072C YML072C::YML072C::molecular\_function unknown  
 1 0.939125926  
 0.910873354 1.137050089 1.389799864 0.767339617 1 0.901188547  
 0.455325123 0.626978274 0.953267274 0.363057479 1 0.665535197  
 0.587806318 1.034652326 0.572701681 0.603838072 0.494727558  
 YER051w YER051w::YER051W::molecular\_function unknown 1 0.789077208  
 0.86335513 0.982438629 0.850587203 1 0.921814788 0.931085606  
 1.009950271 1 0.776563059 1.045619416 0.857360598 0.943078877  
 0.832990802 1.198273212 1.77309309 0.766041517 1 0.64891163  
 0.840682299 0.449840344 0.595957035 1 0.971284898 1.224267339  
 1.177495443 1.109880065 1.170295638 1 0.908078719 0.759940906  
 0.939665533 0.917888832 1 0.867182856 0.991321346  
 0.840690611 0.889692466 0.593673049  
 YHR060W "YHR060W::VMA22::Required for V-ATPase activity. Required for the  
 biogenesis of a functional vacuolar ATPase (V-ATPase), but not part of the final  
 enzyme complex." 1 0.789029661 0.967503307 0.843547653 1.208104722 1  
 0.734711243 0.812640522 1.117941789 1.036997626 1 0.854530799  
 0.999245964 1.139139782 1.046538462 1 1.074898261 0.823963585  
 1.074837696 1 1.468225277 1.556319786 0.919307118 1  
 1.011692305 1.027914083 0.968158891 1.18625682 1.376834929 1  
 0.785183211 0.568520158 0.591667643 0.796497062 0.487111821 1  
 0.716994682 0.627479994 0.728018833 0.430514423 0.914517103 0.563026238  
 YML075C YML075C::HMG1::Induces cell to assemble stacks of paired nuclear-  
 associated membranes called karmellae. 1 0.965660977 0.748647514  
 1.261595595 0.712755898 1 1.104184902 1.332827707 0.687119684  
 0.803972438 1 0.962993534 1.000666305 0.517442777 0.636908324 1  
 0.69226908 1.143231534 1.062062729 0.567100178 1 0.596082269  
 0.568847499 0.46445103 0.412432365 1.046536332  
 0.781461324 1 1.227478792 1.139730472 1.313227822  
 1.166955396 1.328764362 2.194313781  
 YML075C YML075C::HMG1::Induces cell to assemble stacks of paired nuclear-  
 associated membranes called karmellae.  
 1 0.653998936 0.637490612 0.985459095  
 1.213285091 0.819624011 1 0.520508969 0.320486448 0.409019373  
 1.078009069 0.416086788 1 0.353399904 0.327514695 0.930420725  
 0.604970699 0.563065009 0.571782469



YER064c YER064c::YER064C::molecular\_function unknown 1 0.605221784  
0.604527667 0.546679237 0.402195678 1 0.644603585 0.744800744  
0.483943349 0.478520237 1 0.788463819 0.782075914 0.459268773  
0.573037953 1 1.002805114 0.677305879 0.726665137 0.415043202 1  
0.85949467 1.255759938 1.052851498 1.400866108 1 0.956620916  
1.08680823 1.156119403 1.351447107 1.338274394 1 0.96835132  
0.996137149 0.78257735 1.061599197 0.780773048 1 0.534857393  
0.575714504 0.606903909 0.534888638 0.600886141 0.937793286  
YHR062C "YHR062C::RPP1::Ribonuclease P protein 1; required for processing of  
precursor tRNA and 35S precursor rRNA; ortholog of the human scleroderma  
autoimmune antigen, Rpp30" 1 0.869804412 0.760949947 0.783040674  
0.714763938 1 0.761792614 0.750725645 1.175053468 0.997468315 1  
0.576083071 0.498936144 0.564625741 0.991708499 1 0.356707449  
0.318519146 0.651445852 1 0.58083546 0.821684831 0.530455144  
0.763789937 1 0.919931179 0.974332444 0.904349625 1  
0.843901666 1.032165505 1.68004409 1.29540713 1.956439346 1  
0.735441171 1.075340118 0.793518525 0.740197207 0.739593208 1.547227573  
YML077W YML077W::BET5::Bet5p/18kD component of TRAPP 1 1.03796873  
1.382194354 0.935493617 1.978649721 1 1.002192392 1.340678214  
1.516402042 1 0.921442351 1.063534486 1.261040681 1.179508128 1  
1.040993654 0.678759039 0.782471186 1.342810514 1 1.267677282  
1.973944365 2.018502116 0.982819414 1 0.919284061 0.977797493  
0.533305709 0.675394397 0.974385759 1 0.926155367 1.660737029  
1.113391538 1.002769049 1.737061921 1 1.055926406 1.530386836  
0.970259691 2.013172344 1.241451147 1.609396964  
YER066w YER066w::YER066W::molecular\_function unknown 1 1.258157592  
1.401609703 1.35082269 1 1.146241142 1.269369591 1.169338699  
1.495278554 1 1.212263142 1.115330054 1.4929027 1.082384801 1  
0.936479298 0.691214402 1.208983015 1.225161342 1 1.112139047  
1.963260211 2.185200855 0.974391279 1 1.366920589 1.245937961  
1.407444198 1.316881574 1.304001722 1 0.963595247 1.276236283  
0.900998273 0.979924192 1.064803052 1 0.780019399 1.199248945  
0.875351398 1.512916246 1.138966333 2.492025866  
YML079W YML079W::YML079W::molecular\_function unknown 1 1.367849389  
1.558044086 1.153938284 1.966544027 1 1.293425968 1.260068476  
1.589019547 1.632575272 1 1.057781296 1.385332102 1.969385845  
1.254411881 1 1.076519017 0.787813772 0.940158436 1.69166156 1  
1.572215484 1.848640221 1.389588928 1 1.08901952 1.280769936  
1.007947305 0.926175803 1.08223147 1 1.09366729 1.464586991  
1.339193855 1.093302959 1.312013918 1 1.018009442 1.356144675  
0.982408308 1.554489144 1.222224638 1.949139086  
YER068w YER068w::MOT2::Negative regulator of gene expression 1  
0.768974886 0.846527163 0.925551418 0.825650888 1 0.925532139  
0.994186893 0.75706431 0.749596317 1 0.885826542 0.83584688  
0.827537193 0.86010243 1 0.927025283 1.228741756 1.319468451  
0.87274427 1 0.519635813 0.763490114 0.663536289 0.440596448 1  
1.120679243 1.044508828 0.950412458 1.02390699 1.052692429 1  
1.025930091 0.792321052 0.869667573 0.780002862 0.680455358 1  
0.96394814 0.843400727 0.851385443 0.802567637 1.540222567  
YML096W YML096W::YML096W::molecular\_function unknown 1 1.254986905  
1.044664217 1.468872493 1 1.190984505 1.14295564 1.185598697  
1.24525332 1 0.86733105 0.872489387 0.875289635 1.293701628 1  
0.616561704 0.860474573 0.755655394 0.959242795 1 0.948997666  
1.331353184 1.252188919 1.125233101 1 1.103841263 0.885271656  
1.16742173 1.150561777 0.984178078 1 0.861026542 0.64432879  
0.801268212 0.826425963 0.59483299 1 1.001128882 0.853797823  
0.89486462 1.094144559 0.734285147 2.828265537

YER070w YER070w::RNR1::ribonucleotide reductase 1 0.837805344  
0.750001004 1.12227381 0.717020032 1 1.043683251 1.049466901  
0.683905315 0.772115061 1 0.966612666 0.726876128 0.420898339  
1.330792771 1 0.656357073 0.569920806 0.54603287 0.628130043 1  
0.368903368 0.335350004 0.274914474 0.422970466 1 1.049221474  
1.257800288 1.627241637 1.066159095 1.212331657 1 1.62809644  
1.261165598 2.138355857 1.855317981 0.37272395 1 1.46622187  
1.053506357 0.905037436 0.725611645 0.70841601

YML098W YML098W::TAF13::TFIID subunit (TBP-associated factor) with predicted  
molecular weight of 19 kD. 1 1.121580671 1.443339857 1.225677154  
1.56226939 1 1.145336316 1.117681238 1.415208732 1.791200348 1  
1.181127362 1.177251344 1.587651338 1.52520187 1 0.729023869  
0.434589411 0.544276233 1.114227779 1 1.275881991 1.630443357  
1.446815388 0.988343777 1 0.834757628 0.956295518 0.766840727  
0.779330815 0.982647729 1 1.011793671 1.086111464 0.944895953  
1.16398749 1.253939655 1 0.9526569 0.950539195 0.851068151  
1.174775195 0.929960048 6.484871464

YML100W YML100W::TSL1::123 kD regulatory subunit of trehalose-6-phosphate  
synthase/phosphatase complex; homologous to TPS3 gene product 1  
0.944834625 1.200326739 1.322773534 0.676742952 1 1.645875407  
2.0199319 0.758165389 0.6024296 1 1.742628184 2.504903739  
1.752182902 0.947675422 1 6.44785849 5.947197199 8.297192871  
1.64823861 1 2.187101143 1.63098496 2.206956509 1.047904964 1  
1.292924212 1.543714244 1.478531088 1.161540218 1.096964766 1  
1.312125405 0.81759389 1.35069684 0.915205675 0.68873729 1  
1.398246415 0.961767184 1.1028449 0.969259003 1.493412236 0.785434741

YML102W YML102W::CAC2::Involved in DNA-replication-linked nucleosome  
assembly; homologous to the p60 subunit of the Human CAF-I 1 0.898743474  
0.894922123 0.765631127 0.566857995 1 0.992233616 1.081877108  
0.872752964 0.87782048 1 0.886481223 0.92111422 0.878022828  
0.872049371 1 0.867479617 0.522747277 0.794076228 0.916440045 1  
1.228017716 1.280771971 0.906456053 0.737059271 1 0.935950115  
0.934401165 1.260726323 1.178668784 1.096573767 1 1.036472335  
0.761415772 1.134644983 1.022449073 0.925226118 1 0.744149858  
0.711122077 0.914929669 0.736591862 0.747859776 0.889634012

YML104C YML104C::MDM1::Required for nuclear and mitochondrial transmission  
to daughter buds. 1 1.354578071 1.399655302 1.384076373 1.566016732 1  
1.292941618 1.496377522 1.420774706 1.495589642 1 1.117952379  
1.241100118 1.369575545 1 0.955631192 1.435577932  
1.113976643 1 1.322424646 1.673630775 1.181120791 1  
1.075652302 0.685674181 1.158192501 1.154241941 0.983302581 1  
1.126503244 0.985740544 0.921145387 1.224449368 1.02000035 1  
0.942114849 0.982405471 0.758904791 1.108095932 0.792818258 1.592760061

YHR064C "YHR064C::SSZ1::DnaK homolog, interacts with Zuolp (DnaJ homolog) to  
form a ribosome-associated complex (RAC) that is bound to the ribosome via the  
Zuolp subunit" 1 0.95473625 0.610397626 0.869564619 0.573982245 1  
0.963718686 0.790548623 0.559657445 0.760465448 1 0.900832473  
0.716926159 0.352818714 0.886742292 1 1.233094338 0.57419378  
0.677083963 1 0.749566686 0.397411317 0.234534141 0.755228433 1  
0.669110717 0.742415063 0.635036252 0.606483464 0.654867023  
0.869437613 1.073416967 0.836047344 0.930174935 1 1.731954457  
1.602282604 1.217954285 2.061520851 1.168958073

YHR066W YHR066W::SSF1::putative involvement in mating 1 0.550300167  
0.544049786 0.710592175 0.800602552 1 0.566987646 0.56408712  
0.992248838 1 0.403178289 0.327783538 0.279865246 0.873849974 1  
0.516056356 0.3599512 0.325796725 0.517053101 1 0.895689209  
0.616462432 0.52405277 1.325102326 0.907302514 1.029008346

|         |                                                                                                                                                                                                                             |             |             |             |             |             |
|---------|-----------------------------------------------------------------------------------------------------------------------------------------------------------------------------------------------------------------------------|-------------|-------------|-------------|-------------|-------------|
|         | 1.064883624                                                                                                                                                                                                                 | 0.950163918 | 0.923381455 | 1           | 1.069475355 | 0.934048085 |
|         | 1.214209013                                                                                                                                                                                                                 | 1.253741283 | 0.723081561 | 1           | 0.984611918 | 0.824998737 |
|         | 0.979126403                                                                                                                                                                                                                 | 0.648309007 | 0.800809151 | 0.899265805 |             |             |
| YHR068W | "YHR068W::DYS1::Deoxyhypusine synthase carries out the first step in hypusine biosynthesis, converting lysine and spermidine into deoxyhypusine." 1                                                                         |             |             |             |             |             |
|         | 1.27504525                                                                                                                                                                                                                  | 0.988957502 | 1.217175521 | 1           | 0.947494729 | 0.858334273 |
|         | 1.025607889                                                                                                                                                                                                                 | 1           | 1.228056304 | 0.9758622   | 0.66641013  | 1.045841592 |
|         | 1.016292396                                                                                                                                                                                                                 | 0.648182612 | 0.497750914 | 0.464056309 | 1           | 0.899957008 |
|         | 0.605504227                                                                                                                                                                                                                 | 0.496344296 | 0.700209868 | 1           | 0.77475291  | 0.756880446 |
|         | 0.973627892                                                                                                                                                                                                                 | 0.668570628 | 0.878058891 | 1           | 1.354530957 | 1.485843825 |
|         | 1.678252478                                                                                                                                                                                                                 | 1.275176091 | 1.096344306 | 1           | 0.948183779 | 1.246047638 |
|         | 1.16099396                                                                                                                                                                                                                  | 1.121656551 | 0.971340997 | 0.875624    |             |             |
| YER072w | YER072w::VTC1::Null mutant identified in different genetic screens both by its ability to reverse the Cdc42p suppression of a cdc24-4ts mutant and its ability to suppress the vacuolar ATPase null phenotype 1 1.242523282 |             |             |             |             |             |
|         | 1.404972911                                                                                                                                                                                                                 | 0.657641007 | 1.313259952 | 1           | 0.887678063 | 0.982299469 |
|         | 1.090206821                                                                                                                                                                                                                 | 1.003261184 | 1           | 1.078214749 | 1.084413201 | 1.446380806 |
|         | 0.753266581                                                                                                                                                                                                                 | 1           | 1.135998753 | 0.744006692 | 0.813750043 | 0.97721654  |
|         | 1.444399667                                                                                                                                                                                                                 | 2.001339289 | 1.725696278 | 1.079058974 | 1           | 1.121580882 |
|         | 1.155389443                                                                                                                                                                                                                 | 0.811946628 | 1.032868033 | 1.156463299 | 1           | 1.158309756 |
|         | 1.510218896                                                                                                                                                                                                                 | 1.044227938 | 0.826629674 | 1.498541602 | 1           | 0.932246631 |
|         | 1.091678099                                                                                                                                                                                                                 | 0.792651728 | 1.606302203 | 0.825979646 | 1.443904019 |             |
| YHR081W | YHR081W::YHR081W::molecular_function unknown 1 0.554354874                                                                                                                                                                  |             |             |             |             |             |
|         | 0.634573968                                                                                                                                                                                                                 | 0.84886202  | 1           | 0.451725327 | 0.42201908  |             |
|         | 0.806628511                                                                                                                                                                                                                 | 1           | 0.631596458 | 0.558517313 | 0.640595383 | 0.812829215 |
|         | 0.547428499                                                                                                                                                                                                                 | 0.341709635 | 0.712446197 | 1           | 1.695930091 | 1.848444183 |
|         | 1.143098994                                                                                                                                                                                                                 | 1.020248597 | 1           | 1.494506939 | 1.771457474 | 1.991557092 |
|         | 1.405034981                                                                                                                                                                                                                 | 1.021936124 | 1           | 1.00988388  | 1.683808622 | 1.602730345 |
|         | 1.24494024                                                                                                                                                                                                                  | 0.744348799 | 1           | 1.225420273 | 1.38948262  | 1.028191515 |
|         | 0.786631652                                                                                                                                                                                                                 | 0.891179371 | 1.134808707 |             |             |             |
| YER074w | YER074w::RPS24A::Homology to rat S24 1 1.000168601                                                                                                                                                                          |             |             |             |             |             |
|         | 1.129303697                                                                                                                                                                                                                 | 0.730007163 | 1.65080779  | 1           | 0.945554537 | 0.856772253 |
|         | 1.175604092                                                                                                                                                                                                                 | 1.129910314 | 1           | 0.741361328 | 0.746762644 | 0.717459996 |
|         | 0.78408005                                                                                                                                                                                                                  | 1           | 0.761733471 | 0.336702878 | 0.223188369 | 0.53582739  |
|         | 1.578035134                                                                                                                                                                                                                 | 0.948351278 | 0.616207909 | 0.757673558 | 1           | 0.914056445 |
|         | 0.814237125                                                                                                                                                                                                                 | 0.643966537 | 0.979980201 | 1.150977875 | 1           | 1.157802153 |
|         | 1.503986045                                                                                                                                                                                                                 | 0.85048057  | 0.58949818  | 1.466825983 | 1           | 1.062024328 |
|         | 1.168477896                                                                                                                                                                                                                 | 0.710399127 | 1.634124031 | 0.769687418 | 1.599765067 |             |
| YHR083W | YHR083W::YHR083W::molecular_function unknown 1                                                                                                                                                                              |             |             |             |             |             |
|         | 0.994792468                                                                                                                                                                                                                 | 0.974281357 | 1           | 0.947415593 | 1.030099568 |             |
|         | 1.04065207                                                                                                                                                                                                                  | 1           | 1.173619538 | 1.080904331 | 1.079736005 | 0.925876678 |
|         | 1.365163607                                                                                                                                                                                                                 | 1.110583201 | 1.126795899 | 1           | 1.418170266 | 1.379796551 |
|         | 1.40532927                                                                                                                                                                                                                  | 1.298664572 | 1           | 1.14141116  | 1.308110317 | 1.343424716 |
|         | 1.173826214                                                                                                                                                                                                                 | 1.099343052 | 1           | 1.107533317 | 0.834547417 | 0.86655078  |
|         | 1.007911207                                                                                                                                                                                                                 | 0.643788429 | 1           | 0.874078632 | 0.849576963 | 1.214706218 |
|         | 0.627858108                                                                                                                                                                                                                 | 0.686956858 | 0.93253961  |             |             |             |
| YER087w | YER087w::YER087W::not yet annotated 1 0.837076597 1.101311525                                                                                                                                                               |             |             |             |             |             |
|         | 1.265006224                                                                                                                                                                                                                 | 1.155087929 | 1           | 1.127071338 | 1.386770617 | 1.203311921 |
|         | 1.048441835                                                                                                                                                                                                                 | 1           | 1.123573082 | 1.409740573 | 1.396904132 | 1.224903738 |
|         | 1.43868657                                                                                                                                                                                                                  | 1.140670393 | 2.338121779 | 1.502421266 | 1           | 1.371625399 |
|         | 2.031236084                                                                                                                                                                                                                 | 2.231245592 | 1.166457578 | 1           | 1.294521635 | 1.378938077 |
|         | 1.490195405                                                                                                                                                                                                                 | 1.199848771 | 1.228605306 | 1           | 1.361346541 | 1.191444096 |
|         | 1.397100791                                                                                                                                                                                                                 | 1.098225299 | 0.791650569 | 1           | 1.075443244 | 1.095032541 |
|         | 1.105644448                                                                                                                                                                                                                 | 0.821718939 |             |             |             |             |
| YHR085W | YHR085W::YHR085W::molecular_function unknown 1 0.808287042                                                                                                                                                                  |             |             |             |             |             |
|         | 0.620708334                                                                                                                                                                                                                 | 0.609996067 | 1           | 0.826291781 | 0.883714368 |             |
|         | 0.813367363                                                                                                                                                                                                                 | 1           | 0.756860072 | 0.64706816  | 0.367185356 | 0.875172844 |

|             |                                                              |             |             |             |             |
|-------------|--------------------------------------------------------------|-------------|-------------|-------------|-------------|
| 0.55171702  | 0.295365933                                                  | 0.54069082  | 1           | 0.578392796 | 0.830809845 |
| 0.50710549  | 0.725093297                                                  | 1.941361583 | 1.879342227 | 2.163261186 |             |
| 1.347580958 | 1.32428145                                                   | 1           | 2.687643969 | 3.810579813 | 2.634024343 |
| 1.466910603 | 0.70357692                                                   | 1           | 2.761868019 | 3.776695762 | 1.937787854 |
| 0.940814509 | 0.852633953                                                  | 1.45003336  |             |             |             |
| YER089c     | YER089c::PTC2::Protein phosphatase type 2C                   |             | 1           | 1.031715986 |             |
| 0.849782282 | 0.818712704                                                  | 0.369056464 | 1           | 1.153769793 | 1.119278652 |
| 0.545842433 | 0.658747009                                                  | 1           | 1.168593155 | 1.113192484 | 0.839280928 |
| 0.589741414 | 1                                                            | 0.997833128 | 0.958301896 | 1.126952701 | 0.738543098 |
| 0.788879231 | 0.872520666                                                  | 0.594146935 | 0.952620018 | 1           | 1.179669844 |
| 1.171709169 | 1.425990409                                                  | 1.345638189 | 1.220786378 | 1           | 0.738369465 |
| 0.678558891 | 0.999632707                                                  | 0.680992692 | 1           | 0.967706359 | 0.6269169   |
| 0.805881761 | 0.694414128                                                  | 0.633008476 | 0.815205939 |             |             |
| YHR087W     | YHR087W::YHR087W::molecular_function unknown                 |             | 1           | 1.233932299 |             |
| 3.12225589  | 2.01248966                                                   | 2.159015128 | 1           | 1.586661207 | 2.900951546 |
| 2.979838333 | 2.026567641                                                  | 1           | 1.483001888 | 3.920897126 | 16.66140449 |
| 1.955622118 | 1                                                            | 10.77116833 | 10.06772521 | 15.68153491 | 10.75517344 |
| 5.760939283 | 12.55299098                                                  | 22.51967183 | 6.126923142 | 1           | 1.302759244 |
| 1.356423698 | 1.167622532                                                  | 1.182372218 | 0.978882348 | 1           | 0.786644149 |
| 1.360819081 | 1.214637539                                                  | 0.849103293 | 1.081255588 | 1           | 1.075598456 |
| 1.425721315 | 1.038663382                                                  | 1.299810159 | 1.111073424 | 1.342331585 |             |
| YML106W     | YML106W::URA5::Fifth step in pyrimidine biosynthesis pathway |             |             |             | 1           |
| 1.450183097 | 1.194827351                                                  | 0.885559952 | 1.565653539 | 1           | 1.019431967 |
| 0.914747597 | 1.215700873                                                  | 1.219032171 | 1           | 0.925316511 | 0.763214527 |
| 0.881364222 | 0.902242499                                                  | 1           | 0.743616273 | 0.500140928 | 0.585520693 |
| 0.811073617 | 1                                                            | 0.986582588 | 0.885581237 | 0.848281448 | 0.703158693 |
| 1.160223018 | 1.098422716                                                  | 0.717628646 | 1.242793851 | 1.165553935 | 1           |
| 1.01061088  | 0.971163303                                                  | 0.548924329 | 0.500122972 | 1.026488101 | 1           |
| 0.94008555  | 0.964438437                                                  | 0.624620475 | 1.578141649 | 0.843184614 | 1.663685579 |
| YER091c     | YER091c::MET6::cobalamin-independent methionine synthase     |             | 1           |             |             |
| 1.085383694 | 0.898606585                                                  | 1.627624199 | 0.577516778 | 1           | 1.291995236 |
| 1.338844831 | 0.782142143                                                  | 1           | 1.128002635 | 1.46971249  | 0.502314009 |
| 0.462022861 | 1                                                            | 1.64974277  | 1.435827624 | 0.979899708 | 0.326186636 |
| 0.49475102  | 0.258528496                                                  | 0.149872506 | 0.509461854 | 1           | 0.423368629 |
| 0.412079339 | 0.562194362                                                  | 1.896802678 | 0.918017245 | 1           | 0.845514382 |
| 0.193230805 | 0.179508909                                                  | 0.83062895  | 1.325154943 | 1           | 0.711396194 |
| 0.247304034 | 0.819515677                                                  | 0.870398215 | 1.844307543 | 0.830967177 |             |
| YHR089C     | YHR089C::GAR1::small nucleolar RNP proteins                  |             | 1           | 1.215281076 |             |
| 0.865123844 | 0.997137237                                                  | 1           | 0.89459512  | 0.786483195 | 1.235054291 |
| 0.93281288  | 0.500689974                                                  | 0.590039879 | 1.032313798 | 1           | 0.226894065 |
| 0.265434934 | 0.378472952                                                  | 1           | 0.276865768 | 0.287631469 | 0.597964631 |
| 1.177400376 | 1.062483402                                                  | 1.730779361 | 1.671330324 | 1.405523918 | 1           |
| 0.926034346 | 0.73637089                                                   | 0.985352473 | 0.535823488 | 0.554251199 | 1           |
| 1.071451557 | 0.965105226                                                  | 1.078902151 | 0.56362067  | 0.690491221 | 1.61377508  |
| YML120C     | YML120C::NDI1::NADH dehydrogenase (ubiquinone)               |             | 1           | 0.870746695 |             |
| 0.95723228  | 1.072299738                                                  | 0.661389287 | 1           | 1.22694773  | 1.302949549 |
| 0.839351796 | 0.783814324                                                  | 1           | 0.942518664 | 0.92525648  | 1.082716272 |
| 0.823747135 | 1                                                            | 1.425264423 | 0.869383831 | 1.731448626 | 1.037432975 |
| 1.699548009 | 0.891434727                                                  | 1.198377283 | 1.057043751 | 1           | 0.758517653 |
| 0.644108628 | 1.015906993                                                  | 1           | 0.43033339  | 0.194482488 |             |
| 0.268976967 | 0.33754179                                                   | 0.551832945 | 1           | 0.69829171  | 0.31034434  |
| 0.892176948 | 0.814577942                                                  | 1.896990065 | 0.733772912 |             |             |
| YER093c     | YER093c::TSC11::Binding Protein of TOR                       |             | 1           | 0.860270581 |             |
| 0.887616527 | 0.948889535                                                  | 0.813035313 | 1           | 0.985560865 | 1.047953213 |
| 0.887523397 | 0.850364954                                                  | 1           | 0.883072696 | 0.892379103 | 0.939686524 |
| 0.873546799 | 1                                                            | 1.22669947  | 1.249569061 | 1.646321919 | 1.130637604 |
| 1.160732449 | 1.445017134                                                  | 0.952506265 | 1.172343729 | 1           | 0.972460851 |

1.073575124 0.872370599 0.878474275 0.978413129 1 1.138503509  
1.213710549 1.10233753 1.121188388 1.192994913 1 0.735887018  
0.992558978 0.927060974 1.252173513 0.841345724 1.751248  
YHR091C YHR091C::MSR1::Nuclear-encoded mitochondrial protein  
0.865594772 0.860946388 1.008567703 0.815481181 0.871724195  
0.945706904 0.898336405 0.845015709 0.894578924 0.882135969  
0.788782064 0.905564837 1.396074  
1 0.851899624 1.105250133 0.892386052  
0.717286049 0.861249297 1.174957807 1 1.394662314  
1.937416346 1.386283867 0.686489198  
YML122C YML122C::YML122C::molecular\_function unknown 1 1.254038666  
1.417988259 1.211108227 1 1.320202392 1.873243089 1.577488472  
1.737325707 1 1.409885127 1.125007115 1.587427747 1.561905906 1  
1.062801772 0.927009358 1 0.592169848 1.709518532 0.992123508  
0.562101105 0.954094225 0.957217005 0.848673814 1.117896912 1  
0.761968104 1 0.773009861 0.638496919  
1.552481354  
YER095w "YER095w::RAD51::Involved in processing ds breaks, synaptonemal  
complex formation, meiotic gene conversion and reciprocal recombination." 1  
0.983265235 0.872518438 0.895502736 0.659408059 1 0.976285686  
0.856691377 1.025772797 1 0.862314221 0.791611848 0.977357791  
0.887537507 1 0.759791593 0.486829234 0.647005031 1.04559379 1  
1.170743291 1.503897263 1.368849266 2.156913286 1 1.3010482  
1.113429469 1.647571693 1.32530188 1.305349366 1 1.243562198  
1.565107729 1.300947689 1.426414267 0.843088585 1 1.081734671  
0.833088899 0.774328764 0.877473201 0.662931832 0.917653933  
YHR105W YHR105W::YHR105W::molecular\_function unknown 0.887757946  
1.144981558 0.822333934 1.084812321 1.252155464 0.93174752  
1.199603846 1.204739725 1.070406466 1.29813939 1 0.564742561  
0.854080833 0.841006516 0.92837175 1 0.951472158 1.381089744  
1.322099431 0.970415221 1 1.887410532 2.170914623 3.15379066  
1.350268791 1.030482978 1 1.985981594 3.072404954 3.553246797  
2.540720259 1.12408399 1 2.170168834 3.488771198 2.066693291  
0.827815438 0.754047244 1.433396457  
YML125C YML125C::YML125C::molecular\_function unknown 1 1.119755765  
0.963140891 1.069330329 0.993103213 1 0.938740733 0.816046054  
1.213843715 1.227845305 1 1.113935103 0.880370259 0.87341166  
1.196560685 1 0.667482555 0.514214213 0.668207204 0.769358101 1  
0.652628382 0.633726497 0.594288342 0.545642788 1 1.138994029  
1.019597071 1.22394748 1.100653461 0.857723743 1 1.142141941  
1.343310197 1.307771266 0.896373656 0.692431628 1 1.007153043  
0.933378651 1.032215922 0.717978199 0.597424038 1.415883994  
YER097w YER097w::YER097W::molecular\_function unknown  
0.89078779 0.818996203 1.121237769  
1.179354465 3.06748575 1.050455152 2.034850094 1  
1.119577048 0.898311386 0.729455375  
1.09268846 1.021939257 1 0.954442434 0.986798798 1.140937279  
0.898562177 1.019364056 1 0.995479136 1.103971419  
0.947464693 0.857235872  
YML127W YML127W::RSC9::Remodels the Structure of Chromatin 1  
0.92039404 0.907350302 0.890879939 0.799747617 1 0.98321411  
0.864493139 0.828923648 0.885171053 1 0.948905383 0.970808239  
0.931995247 0.868518379 1 1.083290792 0.682253911 0.996448949  
0.839177247 1 1.003577219 1.003708234 0.876603854 0.590437228 1  
0.902237646 0.847878742 0.920564915 0.898843411 0.908721597 1  
1.097896658 0.748009577 0.942847948 0.745963905 0.559913167 1  
0.972008595 0.739856094 0.888767343 0.655789017 0.849113555 0.727643518

YER111c YER111c::SWI4::Involved in cell cycle dependent gene expression 1  
0.614976747 0.6616896 0.911310198 0.696304659 1 0.706070656  
0.868479681 0.671253483 0.676470611 1 0.760036826 0.767452374  
0.483309198 0.940801089 1 0.973832206 0.848063734 0.896298231  
0.4551893 0.646330592 0.749944519 0.40767525 1 1.108412617  
1.186697301 1.278464317 1.049200987 0.929211456 1.06611476  
1.068343601 0.774068142 1.042495232 1 0.884710082 1.320650847  
0.621734074 0.973438001 0.612183247  
YER111c YER111c::SWI4::Involved in cell cycle dependent gene expression  
1  
0.863256504 1.078751475 1.034795744 0.708248668 1.066386758 1  
1.359513372 1.104394541 1.83581325 1.440912155 0.723457181 1  
1.194704745 1.396197164 1.438366916 0.81672533 1.2514555 0.813454714  
YML129C "YML129C::COX14::Mitochondrial membrane protein, required for  
assembly of cytochrome c oxidase" 1 1.613805391 1.307974549 1.387580458  
1.664322728 1 1.375889654 1.304803803 1.391292117 1.625826004 1  
1.342696539 1.359847557 1.097704116 1 1.744655455  
1.646525102 1.687931301 1 1.287585258 1.616802532 1.420905207  
0.792335796 1 1.517225303 1.779792991 1.151644348 1.038564261  
1.339045607 1 1.490236276 2.129785864 1.549146287 1.372383504  
1.946379019 1 1.461192827 1.690864663 1.304087836 2.106493221  
2.034219804 1.278411073  
YER113c YER113c::YER113C::molecular\_function unknown 1 0.74045178  
0.700001773 0.746824699 0.642613416 1 0.823311108 0.826656088  
0.576353982 0.57719456 1 0.726482566 0.598958074 0.509729321  
0.556745557 1 0.553949943 0.570778236 0.536882142 1  
0.675273113 0.544116201 0.720532264 0.879131871 1 0.836263396  
0.751856314 0.551268543 0.914736316 0.847099572 1 0.8434479  
0.576946235 0.701254378 0.749366629 0.708324816 1 0.872500501  
0.684977586 0.982345937 0.752721736 0.943907568 0.809076598  
YML131W YML131W::YML131W::molecular\_function unknown 1 0.863762281  
0.858071481 0.935460689 0.999614753 1 1.110433188 1.04306639  
1.055142082 1.012446853 1 3.744859363 4.252764225 2.240684724  
1.240005474 1 24.31625015 29.40788357 25.00709897 9.369986715 1  
12.27280927 7.950810309 10.14463954 7.97092569 1 2.541619824  
5.501287278 5.350702454 1.560214834 1.190599415 1 3.187105563  
4.759644307 5.133510774 1.805161542 0.899890209 1 4.332328664  
6.061247079 3.354685667 0.983375221 0.940612679 3.565540951  
YMR014W YMR014W::BUD22 1 0.590224382 0.773139075 0.948026281  
0.981958459 1 0.691944001 1.079833634 1.087458363 1  
0.442431788 0.456077792 0.518169154 0.925095549 1 0.309905416  
0.211638558 0.297391513 0.746659678 1 0.833565003 0.92250576  
0.773194343 0.720121337 1 0.548703687 0.593635072 0.436846189  
0.442683603 0.81181934 1 0.835567334 0.941736435 0.464757338  
1.748840263 1.659142756 1 0.639297002 0.877166811 1.068188473  
1.203457485 0.712553761 0.870370271  
YMR016C YMR016C::SOK2::Protein that can when overexpressed suppress mutants  
of cAMP-dependent protein kinase 1 0.708751714 0.810199245 0.854149865  
0.658486834 1 0.925088644 0.719835764 0.74793181 1  
0.999822496 0.737298828 0.522331152 0.73659171 1 1.214370116  
0.868088481 0.680026995 1 0.739079712 0.918085406 0.548803239  
0.37959612 1 1.144336004 1.017235138 0.718205796 0.692125101  
0.677343161 1 1.603544014 1.220829747 1.164539363 1.405394684  
0.590033551 1 1.563008976 1.340324922 1.111140114 0.730826536  
0.643458945 0.747782872

YMR018W YMR018W::YMR018W::molecular\_function unknown 1  
1.217819019 1 1.843411983 1 1.641379546  
1.67231423 1.440331124 1 0.634948465 0.690178394  
0.801013177 1 2.231015205 5.61351053 3.465718471 1.676873989 1  
0.701012064 0.886131412 1.092639989 1 0.961494175  
1 1.470833645 0.747704248 2.051552013  
YLR157CA YLR157CA  
1 1.108428283 1.204696223 0.928324998 1.031030497  
0.950697492 1 0.937077197 1.577235882 1.178972964 0.972586711  
1.836816831 1 1.390646759 1.391161242 1.271994973 1.643144563  
1.26639468 1.281037964  
YHR107C YHR107C::CDC12::involved in proper bud growth 1 0.91310221  
0.870402798 0.939961795 0.895028547 1 0.917661648 1.008195433  
0.824840249 0.835515026 1 0.974061719 0.906465198 0.788001585  
1.027613343 1 0.987995179 1.262032849 0.821290213 0.635153517 1  
0.976028878 0.582142398 0.541225511 0.815981974 1 0.941512371  
1.095560363 0.831622537 1.114273742 1 1.197703402 1.330973988  
1.220242456 0.845879656 0.850178086 1 1.005011399 1.146986435  
0.881720795 0.835733135 0.882705526 1.257396055  
YHR109W YHR109W::CTM1::cytochrome c trimethylase 1 0.676152851  
0.528333324 0.832559703 0.566724881 1 0.722178838 0.8007588  
0.614699705 0.672023334 1 0.741153583 0.703157424 0.528699568  
0.839511482 1 0.65555642 0.935709736 0.8937817 1  
1.149528021 1.588845657 1.404128853 1 1.132055148 0.902107898  
1.040951033 1.193580857 0.974577208 1 1.301984293 1.321595604  
0.765965868 0.57362462 1.205550195 1 1.13357911 1.115546774  
0.95006419 0.834822763 1.087570148 0.950052073  
YHR111W YHR111W::UBA4::Ubiquitin activating enzyme 1 0.89020633  
0.810356895 0.851242209 0.77481127 1 0.751985253 0.790536399  
1.086676896 1 1.26080863 1.138885459 0.952491258 1.112367662 1  
1.51154418 0.745200758 1.198878198 1.105240907 1 1.669235089  
2.221333802 1.596809914 1.3523205 1 0.716814431 0.601021819  
0.994108337 1.358532718 0.656334632 1 0.684126773 0.519475209  
0.544635014 0.698641992 0.435719478 1 0.719520158 0.650712741  
1.135852903 0.783940311 0.768225718 0.605056171  
YER115c YER115c::SPR6::sporulation-specific protein 1 0.848931657  
0.839651335 0.74787068 0.661241327 1 0.787191392 1.098202749  
0.846092617 1 0.69005131 0.731877814 1.358874949 0.812237347 1  
0.717190202 0.548336277 0.826939308 1.239584407 1 1.419853226  
1.855251829 1.830500699 1.950686518 1 0.930460302 0.932875432  
0.998614129 0.90299228 1.092921683 1 0.871945831 1.069539605  
1.008173479 1.219047482 1.722517169 1 0.861155893 0.760079137  
0.881082922 0.502280869 0.985550522 1.34058036  
YHR113W YHR113W::YHR113W::molecular\_function unknown 1 1.429356545  
1.222613175 1.360036941 1 1.157151867 1.092918858  
1.267109513 1 1.208404673 1.297105968 1.720331512 1.370033829  
0.41211512 1 0.92291717  
0.972616748 0.878157021 1.12721081 1.12597335 1 1.375214359  
0.972343263 1.017200902 1.208680673 1.335149965 1 1.033454789  
0.964560829 0.879586443 1.251959583 1.01826099 0.854609034  
YER117w YER117w::RPL23B::Homology to rat L23 and E. coli L14 1  
1.163181192 1.219887216 0.839588481 1.563331414 1 1.072098769  
0.905055911 1.594599858 1.271148686 1 0.997626467 0.912056931  
0.809638676 1.156616169 1 0.623236234 0.640353164 0.199392166  
0.434087602 1 0.816416542 0.488798751 0.846042274 1  
1.185027614 0.774743609 1.172771327 1.310355795 1.238016475 1

|         |                                                                                                                                                           |             |             |             |             |             |   |             |
|---------|-----------------------------------------------------------------------------------------------------------------------------------------------------------|-------------|-------------|-------------|-------------|-------------|---|-------------|
|         | 1.226027956                                                                                                                                               | 1.339884303 | 1.050597046 | 0.648142868 | 1.319325652 | 1           |   |             |
|         | 0.935754155                                                                                                                                               | 0.867663177 | 0.768702503 | 1.031277024 | 0.881801392 | 1.086649433 |   |             |
| YHR115C | YHR115C::YHR115C::molecular_function unknown                                                                                                              |             |             |             |             |             | 1 | 0.832983801 |
|         | 0.707854363                                                                                                                                               | 0.675806258 | 0.54394939  | 1           | 0.783318712 | 0.805685723 |   |             |
|         | 0.62518287                                                                                                                                                | 0.594837885 | 1           | 1.044169229 | 0.907346005 | 0.776908058 |   |             |
|         | 0.668351965                                                                                                                                               | 1           | 1.472245462 | 2.987398434 | 1.4000142   | 1.596642883 | 1 |             |
|         | 0.969890287                                                                                                                                               | 1.206944275 | 1.368969194 | 1.065220649 | 1           | 0.919312737 |   |             |
|         | 1.104424177                                                                                                                                               | 1.00359729  | 0.813372532 | 0.880609645 | 1           | 1.199803004 |   |             |
|         | 1.785761875                                                                                                                                               | 1.422513711 | 1.302449004 | 1.957892336 | 1           | 0.811559613 |   |             |
|         | 1.418625627                                                                                                                                               | 0.878438824 | 1.146595156 | 1.00039387  | 1.238132366 |             |   |             |
| YER119c | YER119c::YER119C::molecular_function unknown                                                                                                              |             |             |             |             |             | 1 | 1.077473184 |
|         | 1.177930643                                                                                                                                               | 0.815223333 | 0.513658529 | 1           | 1.055197364 | 1.095287643 |   |             |
|         | 0.767894361                                                                                                                                               | 0.719175933 | 1           | 1.266241005 | 1.43751233  | 0.820964994 |   |             |
|         | 0.882679201                                                                                                                                               | 1           | 0.904058808 | 0.357601703 | 1.864536159 | 1.096389305 | 1 |             |
|         | 0.906743978                                                                                                                                               | 1.008897621 | 1.287734289 | 1           | 1.041133081 | 1.258983061 |   |             |
|         | 1.170205701                                                                                                                                               | 1.281631422 | 0.910785467 | 1           | 0.986243289 | 0.965941049 |   |             |
|         | 1.217957536                                                                                                                                               | 0.902524636 | 0.659968281 | 1           | 0.997097063 | 0.997331387 |   |             |
|         | 1.152868474                                                                                                                                               | 0.476443143 | 1.83525669  | 0.791564082 |             |             |   |             |
| YHR129C | YHR129C::ARP1::actin-related protein of the dynactin complex                                                                                              |             |             |             |             |             | 1 |             |
|         | 1.094765307                                                                                                                                               | 0.887438274 | 0.898395703 | 0.988910666 | 1           | 0.906277115 |   |             |
|         | 0.956144183                                                                                                                                               | 1.107755789 | 1.1339458   | 1           | 0.763276782 | 0.767123525 |   |             |
|         | 0.758305854                                                                                                                                               | 1.071873419 | 1           | 0.578181594 | 2.374145391 | 1.801684512 |   |             |
|         | 0.697214139                                                                                                                                               | 1           | 0.518674965 | 0.286053433 | 0.184840504 | 0.286323039 | 1 |             |
|         | 1.050926651                                                                                                                                               | 1.042354589 | 1.167616915 | 1.294577864 | 1           | 1.079246631 |   |             |
|         | 1.005568732                                                                                                                                               | 0.928022818 | 1.178043389 | 1           | 0.6758881   | 0.737854134 |   |             |
|         | 1.052193385                                                                                                                                               | 0.926331737 | 0.685407381 | 0.784559128 |             |             |   |             |
| YER121w | YER121w::YER121W::molecular_function unknown                                                                                                              |             |             |             |             |             | 1 | 1.001754535 |
|         | 1.060260737                                                                                                                                               | 0.934547337 | 1.087511619 | 1           | 0.976061669 | 1.015641721 |   |             |
|         | 1.149473221                                                                                                                                               | 1.156178012 | 1           | 0.904350292 | 1.00937307  | 1.670260713 |   |             |
|         | 1.163143411                                                                                                                                               | 1           | 1.372413303 | 1.307635629 | 2.064338484 | 2.515251018 | 1 |             |
|         | 1.334477343                                                                                                                                               | 2.340953487 | 2.546102247 | 0.927317947 | 1           | 0.926884495 |   |             |
|         | 1.168045296                                                                                                                                               | 0.883822952 | 1.052232246 | 1.049274781 | 1           | 0.850284359 |   |             |
|         | 0.940337571                                                                                                                                               | 0.794314826 | 1.273074408 | 1.737181674 | 1           | 1.115478295 |   |             |
|         | 1.007536944                                                                                                                                               | 1.145072411 | 1.032543933 | 1.543192715 | 1.457913927 |             |   |             |
| YHR131C | YHR131C::YHR131C::molecular_function unknown                                                                                                              |             |             |             |             |             | 1 | 0.856335096 |
|         | 0.823064965                                                                                                                                               | 1.141402187 | 0.689460542 | 1           | 0.980424554 | 1.096117789 |   |             |
|         | 0.947126181                                                                                                                                               | 0.86389619  | 1           | 1.020819634 | 1.122495793 | 0.813741352 |   |             |
|         | 1.121579803                                                                                                                                               | 1           | 1.185185538 | 0.981084751 | 1.344990856 | 1.044648917 | 1 |             |
|         | 0.690197759                                                                                                                                               | 0.751745499 | 0.916179739 | 0.711117555 | 1           | 0.940451462 |   |             |
|         | 1.010472705                                                                                                                                               | 0.646959188 | 0.965112062 | 1           |             | 1.445752879 |   |             |
|         | 1.182020542                                                                                                                                               | 1           | 1.563291    | 1.584078901 | 1.044748351 |             |   |             |
|         | 1.368870499                                                                                                                                               | 1.674119651 | 1.454411476 |             |             |             |   |             |
| YMR020W | "YMR020W::FMS1::Multicopy suppressor of fenpropimorph resistance (fen2 mutant), shows similarity to Candida albicans corticosteroid-binding protein CBP1" |             |             |             |             |             | 1 |             |
|         | 0.962464201                                                                                                                                               | 1.001875781 | 1.319845434 | 1.105961965 | 1           | 1.116186327 |   |             |
|         | 1.210627968                                                                                                                                               | 1.355761389 | 1.345195731 | 1           | 1.223073155 | 0.767896052 |   |             |
|         | 1.306999644                                                                                                                                               | 1.60424054  | 1           | 2.026856844 | 1.724429812 | 1.478848073 | 1 |             |
|         | 0.823384866                                                                                                                                               | 1.174024711 | 1.082688057 | 0.943864361 | 0.801730928 | 1           |   |             |
|         | 1.077378734                                                                                                                                               | 1.28904541  | 1.137822516 | 1.703516479 | 1.021143588 | 1           |   |             |
|         | 1.108558849                                                                                                                                               | 1.116084804 | 1.169738543 | 1.158656242 | 1.067126488 | 1.381734628 |   |             |
| YER135c | YER135c::YER135C::molecular_function unknown                                                                                                              |             |             |             |             |             |   |             |
|         |                                                                                                                                                           |             |             |             | 0.946421152 |             | 1 |             |
|         | 0.548894593                                                                                                                                               |             | 1           | 0.471676417 |             | 0.760019017 |   |             |
|         | 0.660790115                                                                                                                                               | 0.69582314  |             | 0.819274003 | 0.642061116 |             |   |             |
|         | 0.769160467                                                                                                                                               |             | 1           |             |             | 0.241659218 |   |             |



YHR133C YHR133C::YHR133C::molecular\_function unknown 1 1.32578591  
0.945092345 0.948133823 0.968635221 1 1.027853831 0.919250458  
0.981250908 1.060581006 1 0.987232215 0.980744472 0.977988378  
0.887115081 1 1.053937428 0.897335367 0.725717084 0.921157463 1  
0.971967006 0.789669983 0.673990955 0.765801333  
0.998202063 1  
0.83857166 0.771803055 1.398131438 0.977612464 2.703051194  
YMR022W YMR022W::QRI8::part of the HRDDER pathway of ER-associated protein  
degradation 1 1.251467705 1.624265836 1.243016654 2.136615348 1  
1.280014378 1.342319405 1.763530918 1 1.276450226 1.343816108  
1.984833575 1.323751341 1 1.082363343 0.786628653 0.798742916  
1.512825377 1 2.153713247 2.10774149 3.315516951 1.879651486 1  
1.230997208 1.583781979 1.261529971 1.023515609 1.204677718 1  
1.062009452 1.339246915 1.137310482 0.835303805 1.160525939 1  
1.040527676 1.257371065 0.964937412 1.23225969 1.116697836 1.466670158  
YER137c YER137c::YER137C::molecular\_function unknown 1 1.370910344  
1.452593539 1.414995762 1.359666257 1 1.334122889 1.427807433  
1.452414934 1.342194311 1 1.164173855 1.564646318 1.16359205  
1.323173294 1  
0.865418864 1.075261521 0.945895856 1.083571913  
0.895731138 1.025907242 0.9044757 0.790349171  
0.822683173 1.058629408  
YHR135C YHR135C::YCK1::membrane-bound casein kinase I homolog 1  
0.794471168 0.86941385 0.748625413 0.833768011 1 0.869422245  
0.86877737 0.883887648 0.703167763 1 1.003386861 0.953070863  
0.665072678 0.796534153 1 1.210883618 0.833685414 1.085473047  
0.579600389 1 0.921928095 0.761718959 0.818813085 0.73971394 1  
1.143711848 0.985677993 0.851868033 0.863388768 1.0255903 1  
1.181482862 1.38858671 1.430004013 1.313257401 2.061131621 1  
0.731252924 1.404477782 0.830756921 1.132094091 0.707621795 2.219706915  
YMR024W YMR024W::MRPL3::Mitochondrial ribosomal protein MRPL3 (YmL3) 1  
0.771223025 0.874556973 0.949020488 0.881449607 1 1.052092938  
0.941371863 0.970088015 1 0.897749453 0.746200891 0.854575897  
0.75752401 1 0.714759665 0.802746894 0.568094824 0.90234754 1  
1.479841887 1.545436157 1.553995518 1 1.033217507 1.118259716  
0.921630081 1.008335954 0.990442698 1 1.169636367 1.138172188  
0.803698024 0.74988463 0.903431181 1 1.218958875 0.914407285  
1.118324541 1.27900619 0.832718402  
YHR137W YHR137W::ARO9::aromatic amino acid aminotransferase II 1  
0.804619336 0.759926348 0.608645995 0.407104097 1 0.955108519  
0.971188231 0.665401501 0.475877587 1 1.608188984 1.77548012  
0.715199168 0.401026014 1 2.269646072 2.263489961 1.312872721  
0.396098441 1 1.542587994 1.864026689 1.08624202 0.387646857 1  
1.025183837 1.363621401 1.266210559 0.957261526 1.109659179 1  
1.17645534 1.264606572 1.706464803 1.429120888 1.620713636 1  
0.997655194 1.01068683 0.769324303 1.34955305 1.226456812 1.152321171  
YER139c YER139c::YER139C::molecular\_function unknown 1 0.926729774  
1.010577654 1.242940177 1.088229893 1 0.988999601 1.089161028  
1.225987375 1.159497926 1 0.984836864 1.171313205 0.889363565  
1.187184092 1 0.803311829 1.161081778 1.458272231 1  
0.922914458 1.07035612 0.624650864 1 1.202737583 1.519219096  
1.008578688 1.057718362 1.256677901 1 0.712111098 1.058798895  
0.840548975 1 1.020550213 0.996587237 0.96261996  
1.75390776  
YMR039C YMR039C::SUB1::Suppressor of TFIIB mutations 1 0.462429818  
0.857959172 0.65918538 0.874492542 1 0.655794817 0.599050949  
0.93179423 0.94457722 1 0.72880104 0.79923353 0.986155032

|             |                                                                                                   |             |             |             |             |   |             |
|-------------|---------------------------------------------------------------------------------------------------|-------------|-------------|-------------|-------------|---|-------------|
| 0.870848307 | 1                                                                                                 | 0.939641122 | 0.783487217 | 0.648912719 | 1.204300408 | 1 |             |
| 1.273358171 | 1.909016671                                                                                       | 1.768798046 | 1.231628556 | 1           | 0.952135523 |   |             |
| 1.220725324 | 0.770201029                                                                                       | 0.590164781 | 0.970431    | 1           | 1.45638007  |   |             |
| 1.584720657 | 1.473348965                                                                                       | 1.947166206 | 2.035262056 | 1           | 1.280699431 |   |             |
| 1.399904096 | 1.323410548                                                                                       | 1.4211767   | 1.674891685 | 1.293296646 |             |   |             |
| YER141w     | YER141w::COX15::cytochrome oxidase assembly factor                                                |             |             |             |             | 1 |             |
| 1.196736915 | 0.995183606                                                                                       | 1.470551777 | 0.98243336  | 1           | 1.362766453 |   |             |
| 1.399079712 | 1.079904784                                                                                       | 1.030100253 | 1           | 1.560650743 | 1.335757018 |   |             |
| 1.09248392  | 0.852313043                                                                                       | 1           | 2.652390364 | 1.698406617 | 2.13245044  |   |             |
| 0.89903925  | 1                                                                                                 | 1.976762879 | 0.757755176 | 0.621775278 | 0.934270425 | 1 |             |
| 0.982251167 | 0.81320217                                                                                        | 0.923781055 | 1.279647038 | 1.040377253 | 1           |   |             |
| 0.863537805 | 0.457148204                                                                                       | 0.489514337 | 0.767395667 | 0.73173987  | 1           |   |             |
| 1.19362183  | 0.574211863                                                                                       | 0.987543977 | 0.966669406 | 1.536275149 | 0.80732532  |   |             |
| YMR041C     | YMR041C::YMR041C::molecular_function unknown                                                      |             |             |             |             | 1 | 1.311625058 |
| 1.325971366 | 1.226949062                                                                                       | 1.599217753 | 1           | 1.22444446  | 1.15564285  |   |             |
| 1.758979331 | 1.814594163                                                                                       | 1           | 1.974758946 | 2.019174214 | 2.641180449 |   |             |
| 1.637769319 | 1                                                                                                 | 2.151452948 | 1.481830272 | 2.325460773 | 2.513484229 | 1 |             |
| 2.48071512  | 3.3325351                                                                                         | 4.198652865 | 2.440226294 | 1           | 1.389977058 |   |             |
| 2.111316116 | 1.749947638                                                                                       | 0.859326389 | 0.858358227 | 1           | 1.281082913 |   |             |
| 2.14906161  | 2.596820395                                                                                       | 1.440816908 | 1.25309922  | 1           | 2.163748168 |   |             |
| 2.589226471 | 1.426794588                                                                                       | 1.20217617  | 2.182046405 | 1.277535408 |             |   |             |
| YER143w     | YER143w::DDI1::DNA Damage Inducible; binds to T- and V- snare complexes                           |             |             |             |             | 1 |             |
| 0.834949767 | 0.943634674                                                                                       | 0.795304737 | 1           | 1.062076533 | 1.194245338 |   |             |
| 1.273972515 | 0.881854838                                                                                       | 1           | 1.25871013  | 1.226736982 | 1.586302984 |   |             |
| 1.537487462 | 1                                                                                                 | 1.463684769 | 1.595713752 | 1.921196966 | 1.30361665  | 1 |             |
| 1.250423671 | 1.365462853                                                                                       | 1.4324076   | 0.889643591 | 1.147159814 | 1           |   |             |
| 1.714400651 | 1.752427737                                                                                       | 1.856778228 | 1.093525353 | 0.993364931 | 1           |   |             |
| 1.417878939 | 1.115106337                                                                                       | 1.101251681 | 0.747863413 | 1.05342465  | 0.958808305 |   |             |
| YMR043W     | YMR043W::MCM1::Involved in cell-type-specific transcription and pheromone response                |             |             |             |             | 1 |             |
| 0.914502981 | 1.004375357                                                                                       | 0.963414966 | 1           | 0.80154048  | 0.951059753 |   |             |
| 0.999905927 | 1.016699305                                                                                       | 1           | 1.100342379 | 1.385763778 | 1.377715085 |   |             |
| 1.194925494 | 1                                                                                                 | 0.748391303 | 0.884671313 | 0.795908908 | 0.842066527 | 1 |             |
| 0.981977561 | 1.024141013                                                                                       | 1.190693305 | 1.049294331 | 1.391253212 | 1           |   |             |
| 1.149927645 | 0.948188593                                                                                       | 0.862144342 | 1.165001345 | 0.897349441 | 1           |   |             |
| 0.768761319 | 0.780111221                                                                                       | 0.873790125 | 0.946622018 | 0.677216546 | 0.798569088 |   |             |
| YER145c     | "YER145c::FTR1::high-affinity iron transporter, primarily expressed under oxygenated conditions." |             |             |             |             | 1 |             |
| 0.923372663 | 1                                                                                                 | 0.714534647 | 0.643372171 | 0.565076478 | 1.043682143 | 1 |             |
| 2.520747513 | 1.707981802                                                                                       | 0.589357712 | 0.750147346 | 1           | 2.171728586 |   |             |
| 0.721133022 | 0.459367042                                                                                       | 0.642486793 | 1           | 1.302763461 | 0.60426179  |   |             |
| 0.234923072 | 0.376003472                                                                                       | 1           | 1.568365529 | 1.32643564  | 2.254247986 |   |             |
| 1.188930398 | 1.115509129                                                                                       | 1           | 1.679484565 | 1.676485542 | 1.547666303 |   |             |
| 0.765749059 | 0.408172622                                                                                       | 1           | 1.740065868 | 1.026947831 | 0.770328227 |   |             |
| 0.501087483 | 0.407377905                                                                                       | 0.943922628 |             |             |             |   |             |
| YMR046C     | YMR046C                                                                                           |             |             |             |             | 1 |             |
| 0.97554183  | 1.001114935                                                                                       | 0.87376778  | 0.659551589 | 1           | 1.445149162 |   |             |
| 1.437165102 | 0.499425851                                                                                       | 1.20122365  | 1           | 1.050249431 | 1.329860515 |   |             |
| 0.939918878 | 0.740694294                                                                                       | 1           | 0.571481339 | 0.359973932 | 0.358635625 |   |             |
| 0.74257399  | 1                                                                                                 | 0.926958585 | 0.854366885 | 1.622553204 | 1.47825495  |   |             |
| 0.797701898 | 1                                                                                                 | 1.107647842 | 1.369581121 | 2.770422164 | 5.598798035 |   |             |
| 1.783998479 | 1                                                                                                 | 1.09187146  | 1.673906858 | 2.232400724 | 0.890482493 |   |             |
| 1.00088268  | 0.869494607                                                                                       |             |             |             |             |   |             |
| YMR048W     | YMR048W::CSM3::Chromosome segregation in meiosis                                                  |             |             |             |             | 1 |             |
| 0.797844084 | 1.072528238                                                                                       | 0.911471683 | 1.118583393 | 1           | 0.804884024 |   |             |
| 0.888841195 | 1.312766049                                                                                       | 1           | 0.808652433 | 0.771177624 | 1.070487712 |   |             |

|             |                                                                                                                                                 |             |             |             |             |               |
|-------------|-------------------------------------------------------------------------------------------------------------------------------------------------|-------------|-------------|-------------|-------------|---------------|
| 1.277438684 | 1                                                                                                                                               | 0.512871018 | 0.370792926 | 0.455040448 | 1.162200281 | 1             |
| 1.054215183 | 1.042079784                                                                                                                                     | 1.126767502 | 0.830955946 | 1           | 1.020265344 |               |
| 1.107797688 | 1.039795267                                                                                                                                     | 0.918557919 | 1.107879912 | 1           | 0.924596537 |               |
| 1.077802925 | 1.119765864                                                                                                                                     | 1.340677062 | 1.453087677 | 1           | 0.979829251 |               |
| 0.936772364 | 1.103268498                                                                                                                                     | 0.674798799 | 1.106324071 | 0.998211347 |             |               |
| YMR051C     | YMR051C                                                                                                                                         | 1           | 0.871375309 | 0.815645585 | 1.295731128 | 0.633622496 1 |
|             | 1.111915453                                                                                                                                     | 0.944870613 | 0.726068154 | 1           | 1.507385479 | 1.392958082   |
| 0.479163898 | 1.180762595                                                                                                                                     | 1           | 0.785265923 | 0.908913591 | 0.727764562 |               |
| 0.509769644 | 1                                                                                                                                               | 0.376825745 | 0.32018004  | 0.328643292 | 0.594869151 | 1             |
| 0.973763342 | 1.070809238                                                                                                                                     | 1.395465305 | 1.671883587 | 0.839891921 | 1           |               |
| 1.216873534 | 1.172005851                                                                                                                                     | 2.684069231 | 8.284715875 | 3.032995608 | 1           |               |
| 1.183537575 | 1.689822782                                                                                                                                     | 2.247783388 | 1.459328683 | 0.8339807   | 0.961435195 |               |
| YMR067C     | YMR067C::YMR067C::molecular_function                                                                                                            | unknown     | 1           | 0.688779393 |             |               |
| 0.822523341 | 0.851579316                                                                                                                                     | 0.849563224 | 1           | 0.933520598 | 0.937636263 |               |
| 0.902772763 | 0.891975157                                                                                                                                     | 1           | 0.800586825 | 1.024421662 | 0.704260345 |               |
| 0.818770707 | 1                                                                                                                                               | 0.772459544 | 1.001325955 | 1.017579221 | 1           |               |
| 1.363336439 | 1.843649765                                                                                                                                     | 1.926015481 | 1.648044558 | 1           | 0.923158062 |               |
| 1.071255212 | 1.24452432                                                                                                                                      | 0.969071246 | 1.145621642 | 1           | 1.533863085 |               |
| 1.508328789 | 1.676055136                                                                                                                                     | 1.149060339 | 1.173819935 | 1           | 1.315436156 |               |
| 1.238288152 | 1.115019129                                                                                                                                     | 0.761957672 | 0.81968591  | 0.757414768 |             |               |
| YHR139C     | YHR139C::SPS100::involved in spore development                                                                                                  | 1           | 1.118453237 |             |             |               |
| 1.340421702 | 1                                                                                                                                               | 1.086311564 | 1.342520412 | 1.362397529 | 1           |               |
| 1.223289089 | 1.360790932                                                                                                                                     | 2.351141901 | 2.275819458 | 0.418822189 |             |               |
| 1.710061382 | 0.49510766                                                                                                                                      | 1           | 0.880955265 | 0.730197224 |             |               |
| 0.881607064 | 1                                                                                                                                               | 0.714302271 | 0.468524597 | 0.323954346 | 1.508740818 |               |
| 1.286194815 | 1                                                                                                                                               | 0.458696531 | 0.238485636 | 0.304642791 | 0.526521571 |               |
| 0.729469692 | 1                                                                                                                                               | 0.50137726  | 0.295475688 | 0.804603933 | 0.879851287 |               |
| 0.74645314  | 0.628698027                                                                                                                                     |             |             |             |             |               |
| YHR152W     | YHR152W::SPO12::Thought to be a positive regulator of exit from M-phase in mitosis and meiosis; interacts with Dbf2p and Dbf20p protein kinases | 1           | 0.929385678 |             |             |               |
| 0.796797956 | 1.17659296                                                                                                                                      | 0.988062985 | 1.508424465 | 1           | 0.929385678 |               |
| 0.937509701 | 1.197179431                                                                                                                                     | 1           | 0.778850788 | 0.959446977 | 1.249049625 |               |
| 0.854172341 | 0.961429621                                                                                                                                     | 1.027267074 | 0.794018602 | 0.942079818 | 1           |               |
| 1.195232045 | 1.421339601                                                                                                                                     | 1.587572473 | 0.951926159 | 1           | 0.94428922  |               |
| 1.04485932  | 0.536222391                                                                                                                                     | 0.640943279 | 0.957453028 | 1           | 1.510894868 |               |
| 2.184404374 | 1.848961466                                                                                                                                     | 1.620716007 | 2.920138004 | 1           | 1.218084545 |               |
| 1.365411754 | 1.082363692                                                                                                                                     | 2.107355801 | 1.72963547  | 1.373854061 |             |               |
| YHR154W     | YHR154W::RTT107::Regulator of Ty1 Transposition; Establishes Silent Chromatin                                                                   | 1           | 0.896184531 | 1           |             |               |
| 0.942778978 | 0.855296532                                                                                                                                     | 0.727387981 | 1           | 0.694131931 | 0.518684996 |               |
| 0.358279282 | 1.181862199                                                                                                                                     | 1.116859244 | 0.596676118 | 0.829523556 |             |               |
| 1.285904568 | 1                                                                                                                                               | 0.403088764 | 0.492268578 | 1           | 1.301712386 |               |
| 1.165070011 | 1.086489562                                                                                                                                     | 1.120918622 | 1.181524529 | 1           | 0.776585404 |               |
| 0.807212004 | 1.208974258                                                                                                                                     | 1.020830958 | 0.756759203 | 1           | 0.911210518 |               |
| 0.819434808 | 0.906360693                                                                                                                                     | 1.120559726 | 0.767962034 | 1.154948061 |             |               |
| YER159c     | YER159c::BUR6::Homolog of DRAP1 (NC2alpha)                                                                                                      | 1           | 0.607102237 |             |             |               |
| 1.20465231  | 0.81885132                                                                                                                                      | 1.241347417 | 1           | 0.736530945 | 0.733090158 |               |
| 1.293762669 | 1.30945298                                                                                                                                      | 1           | 0.741606007 | 0.959025339 | 1.549677882 |               |
| 1.290686217 | 1                                                                                                                                               | 0.832629383 | 0.756165286 | 0.729944611 | 1.713905622 | 1             |
| 1.543440816 | 1.725861656                                                                                                                                     | 2.525689715 | 1.667944931 | 1           | 0.791893641 |               |
| 1.083480227 | 0.807412833                                                                                                                                     | 0.757330943 | 1.254022272 | 1           | 1.203381081 |               |
| 1.494762707 | 2.456166278                                                                                                                                     | 3.65746819  | 1           | 0.95027083  | 1.123350637 |               |
| 1.491914389 | 1.262676936                                                                                                                                     | 2.189961954 | 1.557735134 |             |             |               |
| YHR156C     | "YHR156C::LIN1::LIN element of a link between sister chromatid cohesion, DNA replication and splicing"                                          | 1.06136938  | 1.129707438 |             |             |               |
| 0.937006347 | 1.154204471                                                                                                                                     | 1.006114932 | 0.868820171 | 0.965910383 |             |               |
| 0.976352473 | 0.839119848                                                                                                                                     | 0.948772165 | 0.82383901  | 0.872279172 |             |               |

|                         |                                                                     |             |             |             |             |             |
|-------------------------|---------------------------------------------------------------------|-------------|-------------|-------------|-------------|-------------|
|                         |                                                                     |             |             |             | 1           | 0.929993463 |
|                         | 0.870772833                                                         | 1.033907664 | 1.149068999 | 1.380931527 | 1           | 1.749896672 |
|                         | 1.767124613                                                         | 1.572109634 | 1.245615415 | 1.093312357 | 1           | 0.942864063 |
|                         | 1.185932042                                                         | 1.681935257 | 0.976320768 |             |             |             |
| YER161c                 | YER161c::SPT2::non-specific DNA binding protein (sin1)              |             |             |             |             | 1           |
|                         | 0.705322627                                                         | 1.011095893 | 0.901385694 | 1.090467375 | 1           | 0.846323647 |
|                         | 0.919355543                                                         | 1.060906469 | 0.989833766 | 1           | 0.920470656 | 0.981340079 |
|                         | 0.953700714                                                         | 0.950068009 | 1           | 1.00716407  | 0.888404897 | 1.070276687 |
|                         | 1.253732686                                                         | 1           | 1.48737686  | 1.629841161 | 1.733572516 | 1.320142922 |
|                         | 0.835258761                                                         | 1.181027527 | 0.932402159 | 0.707066423 | 0.853995242 | 1           |
|                         | 1.218555249                                                         | 1.41593496  | 1.256952565 | 1           | 1.302681677 |             |
|                         | 1.149266934                                                         | 1.045579969 | 0.846197278 | 1.034987604 |             |             |
| YHR158C                 | "YHR158C::KEL1::protein containing kelch repeats, similar to        |             |             |             |             |             |
| YGR238c"                | 1                                                                   | 1.847849647 | 1.390998835 | 1.241448967 | 0.978095776 | 1           |
|                         | 1.771570789                                                         | 1.500342739 | 0.92610641  | 1.091574155 | 1           | 1.479309487 |
|                         | 1.729933977                                                         | 1.308795669 | 0.885609732 | 1           | 1.400985651 | 1.241034172 |
|                         | 1.169886561                                                         | 1.066893778 | 1           | 0.906440383 | 0.843105338 | 0.586469609 |
|                         | 0.986901239                                                         | 0.703442114 | 0.868842057 | 1.458826096 | 1.349329718 | 1           |
|                         | 1.423733764                                                         | 0.769786985 | 0.776796434 | 0.94187356  | 0.592589275 | 1           |
|                         | 0.874828548                                                         | 0.534595243 | 1.056190008 | 0.486385517 | 0.844977137 |             |
| YER163c                 | YER163c::YER163C::molecular_function unknown                        |             |             |             |             | 1           |
|                         | 1.346878734                                                         | 1.159622101 | 1.512838202 | 1           | 1.031120211 | 1.154212716 |
|                         | 1.772716513                                                         | 1.574320602 | 1           | 0.977097224 | 1.316341919 | 1.958322021 |
|                         | 1.320566626                                                         | 1           | 1.003418085 | 0.748158497 | 0.943895438 | 2.023328009 |
|                         | 1.438755426                                                         | 1.425212657 | 1.88968817  | 1.222685677 | 1           | 1.134889821 |
|                         | 1.270358912                                                         | 1.44660531  | 1.048277452 | 0.97172777  | 1           | 1.038424848 |
|                         | 1.820324986                                                         | 1.582206324 | 1.36528342  | 1.747481287 | 1           | 1.36886459  |
|                         | 1.454098709                                                         | 1.375816782 | 1.166716315 | 1.61015901  | 1.47980461  |             |
| YHR160C                 | YHR160C::PEX18::Peroxin; Pex18p and Pex21p are partially            |             |             |             |             |             |
| functionally redundant. | 1                                                                   | 1.419654574 | 1.286747613 | 1.360574261 | 1.599374848 | 1           |
|                         | 1.241392875                                                         | 1.288792126 | 1.502614568 | 1           | 1.25417816  | 1.390466573 |
|                         | 1.918647787                                                         | 1.276335205 | 1           | 1.770673641 | 1.561191526 | 2.310087406 |
|                         | 1.060657723                                                         | 1.118008393 | 1           | 0.793626071 | 0.817298316 |             |
|                         | 1.171658923                                                         | 0.94068204  | 0.683333094 | 1           | 0.769006665 | 0.874096234 |
|                         | 1.036954265                                                         | 1           | 0.942523659 | 0.914341156 | 1.267942603 |             |
|                         | 0.778429735                                                         |             |             |             |             |             |
| YER165w                 | "YER165w::PAB1::Poly(A) binding protein, cytoplasmic and nuclear" 1 |             |             |             |             |             |
|                         | 1.434076219                                                         | 0.99787091  | 0.839099144 | 0.628491381 | 1           | 1.199180534 |
|                         | 1.296752254                                                         | 0.559422048 | 0.648539433 | 1           | 1.231613214 | 0.875573037 |
|                         | 0.719797369                                                         | 0.557726703 | 1           | 1.114984349 | 0.844612413 | 0.770474053 |
|                         | 0.623697992                                                         | 1           | 0.313416281 | 0.17174497  | 0.110793205 | 0.258900328 |
|                         | 0.746784859                                                         | 0.751172663 | 1.077839874 | 1.388444255 | 0.604671253 | 1           |
|                         | 0.831572574                                                         | 0.54682951  | 0.609623349 | 0.702511888 | 0.489016133 | 1           |
|                         | 0.660096363                                                         | 0.582048491 | 0.730812707 | 0.597936815 | 0.48212084  | 0.566528741 |
| YHR162W                 | YHR162W::YHR162W::molecular_function unknown                        |             |             |             |             | 1           |
|                         | 1.784960109                                                         | 0.945219209 | 1           | 1.169180816 | 1.086799414 | 1.543288528 |
|                         | 1.509440582                                                         | 1           | 1.896847806 | 1.662558337 | 1.637143323 | 1.058841455 |
|                         | 1.441987397                                                         | 0.930876419 | 0.731014597 | 1.967975599 | 1           | 2.786742899 |
|                         | 3.154054915                                                         | 2.124445404 | 1.160081078 | 1           | 1.113907072 | 1.20536841  |
|                         | 1.112182614                                                         | 1.068499187 | 1.268499883 | 1           | 0.885026005 | 1.219787262 |
|                         | 1.219485215                                                         | 1.215118774 | 1.024451461 | 1           | 0.929833396 | 0.977022723 |
|                         | 0.826288144                                                         | 1.235709562 | 0.660439543 | 1.090151884 |             |             |
| YMR069W                 | YMR069W::YMR069W::molecular_function unknown                        |             |             |             |             | 1           |
|                         | 1                                                                   |             |             | 1           | 1.328939696 |             |
|                         | 0.826741453                                                         | 1           | 1.225488157 |             |             |             |
|                         | 0.132630349                                                         | 1           |             | 1           | 0.89219739  |             |
|                         | 1.511446367                                                         | 1.847516446 | 1           |             |             |             |

YER167w YER167w::BCK2::Serine/threonine protein kinase of the protein kinase  
C pathway 1 0.803312358 0.841911117 1.020891378 0.714878678 1  
0.939991105 0.931285555 0.798497273 0.739970237 1 0.71784476  
0.837466449 0.628101105 0.884093595 1 1.327564818  
1.005522156 1.062308037 1 0.874682119  
0.846160336 0.906890922 0.79572243 0.937700486 1 1.039470539  
1.031417603 0.627928344 0.867641394 0.817487583 1 1.09135433  
0.971397104 1.457469458 1.085877827 1.19830123 0.791564082

YHR176W YHR176W::YHR176W::molecular\_function unknown 1 1.113728405  
1.648907706 1.371939351 1 1.475767376 1.49685336 1.614245122 1  
1.373191498 1.642926947 1.760621828 1.494557592 1 1.278367231  
0.902212826 1.534379574 1.975819522 1 1.387244414 1.962770853  
1.098546112 1.158911868 1 0.382531178 0.560424091 0.434026272  
0.613443156 1 0.56183739 1.444593661 1  
0.955704064 0.600591416 0.926677295 1.024102537 0.640081149

YMR071C YMR071C::YMR071C::molecular\_function unknown 1 1.216501012  
1.481200095 1.039461039 1.750777799 1 0.992617992 0.967667671  
1.754630975 1.580544243 1 1.018595835 1.253724384 4.338836182  
1.2338679 1 1.213666069 0.777070927 1.092436778 1.144231824 1  
2.290322602 2.347330224 2.748135859 1.568252346 1 1.291044813  
1.52765973 1.131215073 0.904638054 1.216653734 1 1.266829913  
2.423496377 2.324408809 1.475219752 1.857402264 1 1.180508612  
1.991162545 1.225817515 1.582531562 1.45541225 1.344958476

YHR178W YHR178W::STB5::binds Sin3p in two-hybrid assay 1 0.756026213  
0.750246158 0.8906935 0.841370968 1 0.961314589 0.920352662  
0.628707948 0.832267693 1 0.931312103 0.926357134 0.9754369 1  
1.410412687 1.010021969 2.05235221 1 1.388445857 1.314192379  
0.939098942 1 1.069672022 0.727818707 0.982240335 0.728118272  
0.883851553 1 1.046353332 0.841155866 1.056019826 0.952730795  
0.839981536 1 0.849461427 0.865404867 1.34862891  
0.949176408

YER169w YER169w::RPH1::Regulator of PHR1 1 1.021513583 1.050955554  
1.337620217 0.826378259 1 0.995679214 1.0807602 1.298233424  
1.125465888 1 0.84039247 0.987066977 0.945271635 1.341497838 1  
1.18374504 1.501423567 1.379376957 1 0.919522745 1.070917039  
0.722720582 1 0.939566124 0.941644044 1.069523411 0.899619502 1  
0.75369223 0.738262574 0.689143506 1.174416711 0.864564354 1  
0.748640121 0.904688809 1.017113863 0.919348832 0.761792884

YHR180W YHR180W::YHR180W::molecular\_function unknown 1 1.133943936  
1.365893802 1.276829902 1.533050309 1 1.127382042 1.109754487  
1.523171606 1.710815264 1 1.16113611 1.253760152 1.725472736  
1.423039951 1 0.822121177 1.095362315 1.406649352 1.691740363 1  
1.266650329 2.964588584 2.522147907 1.900423074 1.059090178  
0.963659894 0.723393437 1.138677735 1 1.200534782 0.717893936  
1.850122968 1.320227092 0.774321339 1 1.160996156 1.699098753  
0.788311604 1.287327489 0.833600872 0.917653933

YMR073C YMR073C::YMR073C::molecular\_function unknown 1 1.351424418  
1.055657868 1.361836242 1 1.029676207 0.991996947 1.426004892  
1.33194304 1 1.010219233 1.095907586 2.19431744 1.293095459 1  
0.786717898 0.569582833 1 1.365743327 1.147349698  
1 0.865168514 0.960117529 0.639055462 0.90803302 0.982294447 1  
0.802224182 0.946251318 0.868239248 0.998523996 1.782222136 1  
1.028992197 1.035912713 1.308439665 1.375555972 1.243386042

YER183c YER183c::FAU1::Folnic Acid Utilization 1 0.88432801  
0.974041755 0.938057206 1.331100604 1 0.855936576 0.698973544  
1.222736358 1.12693571 1 0.6673121 0.815939196 0.963618759  
0.818308033 0.726889213 0.954681788 0.362580335 1

|             |                                                                                                                                                     |             |             |             |                         |
|-------------|-----------------------------------------------------------------------------------------------------------------------------------------------------|-------------|-------------|-------------|-------------------------|
| 1.254898646 | 1.530819367                                                                                                                                         | 1.541039705 | 1           | 0.958827237 | 1.024274053             |
| 0.782936165 | 0.789934803                                                                                                                                         | 0.842002012 | 1           | 1.005319881 | 1.417404738             |
| 0.938282786 | 0.891347893                                                                                                                                         | 1.593935835 | 1           | 1.068256509 | 1.32585937              |
| 0.985888064 | 1.653398366                                                                                                                                         | 1.017322641 | 1.774889805 |             |                         |
| YMR075W     | YMR075W::RCO1::Hypothetical ORF                                                                                                                     |             |             | 1           | 0.679278667 0.816744776 |
| 0.886849186 | 1.027716303                                                                                                                                         | 1           | 0.888646125 | 0.944942235 | 0.97674193              |
| 0.895547106 | 1                                                                                                                                                   | 0.81742931  | 0.927717407 | 0.873583556 | 1.001124209 1           |
| 1.134690791 | 0.707719387                                                                                                                                         | 1.366208181 | 1.598042301 | 1           | 1.907579493             |
| 1.009929227 | 0.697712252                                                                                                                                         | 1           | 0.957192743 | 0.889404848 | 0.930553547             |
| 0.852093241 | 1.019180241                                                                                                                                         | 1           | 0.935100122 | 1.145915473 | 0.81283055              |
| 0.929321136 | 0.974433652                                                                                                                                         | 1           | 0.861472143 | 0.915962216 | 0.941588351             |
| 1.147271016 | 0.996982707                                                                                                                                         | 1.072639421 |             |             |                         |
| YER185w     | YER185w::YER185W::molecular_function unknown                                                                                                        |             |             | 1           | 1.605053305             |
| 1.224758222 | 1.264634705                                                                                                                                         | 1.424234854 | 1           | 1.252014259 | 1.295503515             |
| 1.601915462 | 1.519960858                                                                                                                                         | 1           | 1.138455856 | 1.256290802 | 1.443192139             |
| 1.236830412 | 1                                                                                                                                                   | 0.886679877 | 0.695126137 | 1.343949938 | 1.526275995 1           |
| 2.014315232 | 4.092531                                                                                                                                            | 2.241191051 | 1.256908031 | 1           | 1.223556333             |
| 1.095619146 | 1.202313884                                                                                                                                         | 1.107236214 | 1           | 0.782680982 |                         |
| 1           | 0.706649482                                                                                                                                         | 0.860221704 | 1.118015577 |             | 0.919405158             |
| YMR077C     | YMR077C::VPS20::vacuolar protein sorting (putative)                                                                                                 |             |             | 1           |                         |
| 0.838646301 | 1.421586479                                                                                                                                         | 1.150595156 | 1.40793239  | 1           | 1.008556559             |
| 1.272885352 | 1.449534439                                                                                                                                         | 1           | 0.983634507 | 1.365698581 | 1.422932807             |
| 1.25445259  | 1                                                                                                                                                   | 0.849028715 | 0.788323808 | 1.146379523 | 1.785380218 1           |
| 1.183145189 | 1.535942129                                                                                                                                         | 0.680568721 | 1           | 0.916338397 | 1.180330573             |
| 0.937765184 | 1.064178083                                                                                                                                         | 1.219241678 | 1           | 1.001296312 | 0.869368411             |
| 0.855452858 | 1.653616423                                                                                                                                         | 1           |             | 0.629003817 | 1.067783942             |
| 0.548947375 | 1.308922184                                                                                                                                         | 0.599802442 |             |             |                         |
| YER187w     | YER187w::YER187W::molecular_function unknown                                                                                                        |             |             | 1           | 1.665906954             |
| 1.909086518 | 1.45536117                                                                                                                                          | 1           | 1.378105437 | 1.527323515 | 1.625541305             |
| 1.75824289  | 1                                                                                                                                                   | 1.403082154 | 1.26906224  | 1.326605142 | 1.517134664             |
| 0.297829113 | 1                                                                                                                                                   | 0.437893748 | 0.402962624 | 1           | 0.655033492 1.944738874 |
| 0.27062642  | 1                                                                                                                                                   | 1.249186878 | 1.432064545 | 1.352634049 | 2.423192681             |
| 1.765798204 | 1                                                                                                                                                   | 0.988202686 | 0.558416116 | 0.63356473  | 1.129355928             |
| 0.377228306 | 1                                                                                                                                                   | 0.526629315 | 0.369831956 | 0.486812144 | 0.341771376             |
| 0.471002234 | 0.513115686                                                                                                                                         |             |             |             |                         |
| YMR094W     | "YMR094W::CTF13::58 kd component (Cbf3c) of the multisubunit 'Cbf3' kinetochore protein complex, which binds to the CDE III element of centromeres" |             |             |             |                         |
| 1           | 0.989538945                                                                                                                                         | 0.984242074 | 1.06753115  | 0.793639223 | 1 1.032567178           |
| 1.080497893 | 0.865167208                                                                                                                                         | 1           | 0.841849381 | 1.282038485 | 1.421528298             |
| 1.307854789 | 1                                                                                                                                                   | 0.568734188 | 0.30039294  | 0.61575659  | 1.003867968 1           |
| 1.080265599 | 2.901292306                                                                                                                                         |             | 0.688346968 | 0.772633681 | 1.051097905             |
| 0.986078187 | 1.045180241                                                                                                                                         | 1.121454032 | 1           | 0.827463698 | 0.655683047             |
| 1           | 0.698862397                                                                                                                                         | 1.1112238   |             | 0.88261644  | 0.711882332             |
| YER189w     | YER189w::YER189W::molecular_function unknown                                                                                                        |             |             | 1           | 0.931332773             |
| 0.726421899 | 1.01372322                                                                                                                                          | 0.498088751 | 1           | 1.119594006 | 1.111056381             |
| 0.645129507 | 0.574283962                                                                                                                                         | 1           | 0.917388279 | 0.842364011 | 0.877954726             |
| 1.141057771 | 0.989833538                                                                                                                                         | 1           |             | 0.530046069 | 0.420384164             |
| 0.569822575 | 1                                                                                                                                                   | 0.793804994 | 0.917260692 | 1.055215056 | 1.066154344             |
| 0.978257431 | 1                                                                                                                                                   | 0.68337684  | 0.432417225 | 0.754952632 | 1.066649339             |
| 0.456355211 |                                                                                                                                                     | 1.418059775 |             |             | 0.767922225             |
| YMR096W     | YMR096W::SNZ1::Snooze: stationary phase-induced gene family; involved in cellular response to nutrient limitation and growth arrest 1               |             |             |             |                         |
| 1.621531986 | 1.819544159                                                                                                                                         | 1.595103101 | 1.301004656 | 1           | 1.187206896             |
| 1.210643092 | 1.508152237                                                                                                                                         | 1.462411583 | 1           | 1.82853291  | 4.086729643             |
| 2.856763558 | 1.158432325                                                                                                                                         | 1           | 1.261814855 | 1.084573112 | 1.619627859             |
| 1.092142712 | 1                                                                                                                                                   | 1.223746423 | 2.080676187 | 2.675178556 | 1.999849483 1           |
| 0.88968815  | 0.8568284                                                                                                                                           | 1.000652036 | 1.031528307 | 0.936826259 | 1                       |

|         |                                                                                                                                                                                                                                                      |             |             |             |             |             |             |
|---------|------------------------------------------------------------------------------------------------------------------------------------------------------------------------------------------------------------------------------------------------------|-------------|-------------|-------------|-------------|-------------|-------------|
|         | 0.659132252                                                                                                                                                                                                                                          | 0.990502624 | 0.868208005 | 1.100563034 | 1.827366031 | 1           |             |
|         | 0.666724529                                                                                                                                                                                                                                          | 1.195627558 | 1.015301411 | 1.236783363 | 1.697259331 | 1.257396055 |             |
| YMR098C | YMR098C::YMR098C::molecular_function unknown                                                                                                                                                                                                         |             |             |             |             | 1           | 0.851974554 |
|         | 0.950909781                                                                                                                                                                                                                                          | 1.289479842 | 1.091820593 | 1           | 1.093433219 | 1.277376862 |             |
|         | 0.758201016                                                                                                                                                                                                                                          | 1.071963242 | 1           | 0.951553758 | 1.018036853 | 0.921161928 |             |
|         | 1.101370314                                                                                                                                                                                                                                          | 1           | 1.212234878 | 0.911962673 | 1.108068153 | 1.282403196 |             |
|         | 0.935549393                                                                                                                                                                                                                                          | 1.203579539 | 1.356813157 | 1.150824311 | 1           | 0.879845581 |             |
|         | 0.895169883                                                                                                                                                                                                                                          | 0.834808915 | 0.989352415 | 1.170256585 | 1           | 1.027958046 |             |
|         | 0.741429673                                                                                                                                                                                                                                          | 0.486244781 | 0.821577969 | 1.108073423 | 1           | 1.029887026 |             |
|         | 0.94067073                                                                                                                                                                                                                                           | 0.910142793 | 1.282613222 | 1.194332724 | 1.089276219 |             |             |
| YMR100W | YMR100W::MUB1::Homolog of samB gene of Aspergillus nidulans (deletion of samB results in mislocalization of septa                                                                                                                                    |             |             |             |             | 1           | 0.897996374 |
|         | 0.900925514                                                                                                                                                                                                                                          | 1.212229674 | 0.826710249 | 1           | 1.024690828 | 0.829859885 |             |
|         | 0.951442479                                                                                                                                                                                                                                          | 0.835200553 | 1           | 0.895088102 | 1.102154561 | 0.816149857 |             |
|         | 0.884469687                                                                                                                                                                                                                                          | 1.171771392 |             | 0.89515381  | 1           | 0.751391873 |             |
|         | 0.841485285                                                                                                                                                                                                                                          | 0.730539265 | 1           | 0.7655957   | 0.944898216 | 0.844050776 |             |
|         | 0.898025674                                                                                                                                                                                                                                          | 1           | 1.079014568 | 0.826474664 | 0.684172344 | 0.726430316 |             |
|         | 0.833603552                                                                                                                                                                                                                                          | 1           | 1.328801743 | 1.427243526 | 1.139612876 | 1.304466205 |             |
|         | 1.012952696                                                                                                                                                                                                                                          |             |             |             |             |             |             |
| YMR102C | YMR102C::YMR102C::molecular_function unknown                                                                                                                                                                                                         |             |             |             |             | 1           | 1.400723983 |
|         | 1.50622815                                                                                                                                                                                                                                           | 1.786632015 | 1.335223995 | 1           | 1.671685825 | 1.597181376 |             |
|         | 1.422219973                                                                                                                                                                                                                                          | 1.074196621 | 1           | 1.644371553 | 1.880916513 | 1.250753145 |             |
|         | 1.393631054                                                                                                                                                                                                                                          | 1           | 1.273475847 |             | 1.393552071 | 0.803610484 |             |
|         | 0.926675969                                                                                                                                                                                                                                          |             |             | 1           | 0.850847909 | 0.996628634 |             |
|         | 0.914042763                                                                                                                                                                                                                                          | 0.999966174 | 1           | 1.123311489 | 0.98782962  | 0.885351905 |             |
|         | 1.150676106                                                                                                                                                                                                                                          | 0.553833853 | 1           | 1.015858746 | 0.708575639 | 0.859022477 |             |
|         | 0.729102428                                                                                                                                                                                                                                          | 0.909163619 | 0.851106531 |             |             |             |             |
| YHR182W | YHR182W::YHR182W::molecular_function unknown                                                                                                                                                                                                         |             |             |             |             | 1           | 0.825586379 |
|         | 0.958185954                                                                                                                                                                                                                                          | 1.095005163 | 0.972295217 | 1           | 0.984033529 | 1.086130434 |             |
|         | 0.974605595                                                                                                                                                                                                                                          | 0.930726416 | 1           | 0.892046555 | 0.844992485 | 0.82509012  |             |
|         | 0.945990377                                                                                                                                                                                                                                          | 1           | 1.073670504 | 0.830630736 | 0.866888569 | 0.84984419  |             |
|         | 0.987262101                                                                                                                                                                                                                                          | 1.151731422 | 1.138512477 | 0.898575094 | 1           | 1.113814391 |             |
|         | 1.654440273                                                                                                                                                                                                                                          | 1.29766036  | 1.312798772 | 1           | 0.758971732 | 0.613960123 |             |
|         | 0.710254855                                                                                                                                                                                                                                          | 1.478155721 | 1.145883145 | 1           | 0.649333453 | 0.608860857 |             |
|         | 0.733126187                                                                                                                                                                                                                                          | 1.053730033 | 0.338692545 |             |             |             |             |
| YHR184W | "YHR184W::SSP1::Involved in the control of meiotic nuclear divisions & spore formation; dispensable for mitosis, premeiotic DNA synthesis, recombination, meiosis I, meiosis II, & initiation of prospore walls; required for spore wall elongation" |             |             |             |             | 1           | 1.256537624 |
|         | 1.368803356                                                                                                                                                                                                                                          | 1.309098618 |             | 1           | 1.070530769 | 1.293702404 |             |
|         | 1.736183905                                                                                                                                                                                                                                          | 1           | 0.996638899 | 1.848444568 |             |             |             |
|         | 0.256116739                                                                                                                                                                                                                                          |             | 0.23482095  | 1           | 1.059169423 | 1.102156862 |             |
|         | 0.775840572                                                                                                                                                                                                                                          | 0.789779905 | 1.044339356 | 1           | 0.941642638 | 1.205549339 |             |
|         | 1.414561727                                                                                                                                                                                                                                          | 1.372497584 | 1.477800965 | 1           | 1.045467432 | 1.285767839 |             |
|         | 0.848515077                                                                                                                                                                                                                                          | 1.280528502 | 0.908650133 | 0.924658939 |             |             |             |
| YHR186C | YHR186C::KOG1::<u>K</u>ontroller <u>O</u>f <u>G</u>rowth                                                                                                                                                                                             |             |             |             |             | 1           |             |
|         | 1.37328579                                                                                                                                                                                                                                           | 1.428921936 | 1.544554839 | 1.430292769 | 1           | 1.470923288 |             |
|         | 1.385998052                                                                                                                                                                                                                                          | 1.323749869 | 1           | 1.312084407 | 1.330170561 | 0.954224845 |             |
|         | 1.249268654                                                                                                                                                                                                                                          | 1           | 0.576559192 | 0.42000838  | 0.386644444 | 0.576608956 |             |
|         | 1.133431438                                                                                                                                                                                                                                          | 0.988458447 | 0.677264061 | 0.703816786 | 1           | 1.785029643 |             |
|         | 1.037840881                                                                                                                                                                                                                                          | 1.169307919 | 0.896094061 | 1.901637141 | 1           | 1.201071421 |             |
|         | 0.58224248                                                                                                                                                                                                                                           | 0.980003072 | 0.505782052 | 0.680184402 | 1           | 2.838712994 |             |
|         | 0.9716049                                                                                                                                                                                                                                            | 0.696759996 | 1.682206677 | 1.970033117 | 0.931663945 |             |             |
| YFLTyA  | YFLTyA                                                                                                                                                                                                                                               |             |             |             |             | 1           | 0.803091552 |
|         | 0.948761725                                                                                                                                                                                                                                          | 0.943685503 | 0.804781281 | 0.732101984 | 1           | 1.37257012  |             |
|         | 1.529559023                                                                                                                                                                                                                                          | 0.574624975 | 1.317889651 | 1           | 2.03824843  | 1.052775286 |             |
|         | 0.769931913                                                                                                                                                                                                                                          | 1           | 0.468195479 | 0.637716794 | 0.490464566 | 0.844127903 |             |

0.994375348 1.469218175 1.432725397 1.387639454 0.971923157 1  
1.427198623 1.691741167 2.685145732 4.612349386 1.730143817 1  
1.72052603 2.33116592 2.257034741 1.440127005 1.513815088 1.309933549  
YHR200W "YHR200W::RPN10::homolog of the mammalian S5a protein, component of  
26S proteasome" 1 1.096386206 1.452217248 1.122657037 1.236420655 1  
1.16681051 1.355038184 1.351476936 1 0.992547811 1.387556011  
1.909792289 1.057077516 1 1.315987931 1.106366996 1.476593271  
1.688803083 1 1.243862989 1.387359174 1.874099605 1.206631763 1  
0.996221525 1.099376896 1.019239257 0.898831421 1.13025229 1  
1.09622296 0.873273511 1.08012627 0.886306369 1 0.889793263  
0.785160751 0.632897697 0.75935186 1.034111939  
YFL001W YFL001W::DEG1::Similar to rRNA methyltransferase (Caenorhabditis  
elegans) and hypothetical 28K protein (alkaline endoglucanase gene 5' region)  
from Bacillus sp. 1 0.807518153 0.879171969 0.880716886 0.992096661 1  
0.790044757 0.847050262 0.986864839 1.009616992 1 0.490706301  
0.696299699 0.769272077 0.869513807 1 0.549637085 0.531251509  
0.666597573 0.823923754 1 0.662364908 1.26299572 0.743918919  
0.454715926 1 0.719983888 0.681990572 0.617087331 0.694609457  
0.8428446 1 0.791070257 0.947452375 0.717172953 0.955950884  
1.252739787 1 0.770501061 0.786735337 0.944316827 1.099022774  
0.966125853 0.923783274  
YHR202W YHR202W::YHR202W::molecular\_function unknown 1 0.918406105  
1.082201388 1.08855237 0.970128644 1 1.200967672 1.068247417  
1.128218004 1 1.208759376 0.974633089 0.99480524 1  
0.713228473 1.246411845 0.805561217 1 1.128759188 1.56639632  
1.35707993 1.378611503 1 1.388089638 1.194720698 1.433068746  
1.360924316 1.332255042 1 0.951678972 0.556689364 0.951783315  
0.688043518 0.2718449 1 1.01311479 0.584515287 0.918699314  
0.69299807 0.788013303 0.651464271  
YFL014W "YFL014W::HSP12::induced by heat shock, entry into stationary phase,  
depletion of glucose, and addition of lipids (fatty acids)" 1 0.8431227  
1.491205313 2.307022751 4.286699969 1 0.923585184 1.692261299  
4.997992699 7.338105844 1 0.774863464 1.728084793 12.6834688  
5.827443901 1 1.071060918 9.809913789 14.41272318 1  
1.11676329 2.343586309 18.58903174 11.04645529 1 0.801514799  
1.000994003 1.201024016 0.550117341 0.593842365 1 1.084378885  
1.609169944 2.308075794 5.77388997 2.388224404 1 0.863218556  
1.215867524 0.914206281 0.977978556 16.64117533 0.872121497  
YHR204W YHR204W::MNL1::mannosidase like 1 0.784240719 0.692984335  
0.784248289 0.582823004 1 0.835757898 0.800074983 0.668521319  
0.605402339 1 0.925825441 0.726470035 0.497274513 0.752460858 1  
0.87470434 0.533819977 0.69007362 0.751805317 1 0.751769083  
0.921624927 0.711588951 0.387960903 1 1.31600836 1.370885475  
2.333933131 1.427327419 1.417851164 1 1.441210768 1.894168171  
1.902617691 1.578239022 1.45569588 1 0.775684333 0.91445171  
0.64228914 0.989068486 0.545953719 1.237256701  
YFL016C YFL016C::MDJ1::involved in protection against heat-induced protein  
aggregation but not necessary for protein import into the mitochondrion 1  
0.621504982 0.823405511 0.829332762 0.523666997 1 0.797160754  
0.947955328 0.791521375 0.707257476 1 0.865654828 1.128543402  
1.232551361 0.766186177 1 1.000583378 1.471589418 1.65874469  
1.515097774 1 1.316044714 1.577787022 2.248849903 1.855580901 1  
1.405893482 1.343751274 1.242423691 0.93463585 1.072713016 1  
1.645326524 0.851874592 0.774646436 0.687204346 0.831912049 1  
1.322280274 0.749094791 0.685606604 0.514813546 1.14751656 1.000838238  
YHR206W YHR206W::SKN7::Protein with similarity to DNA-binding region of heat  
shock transcription factors 1 1.018964466 0.862027754 1.177984161



|             |                                                                                                                                                                            |             |             |             |             |             |  |
|-------------|----------------------------------------------------------------------------------------------------------------------------------------------------------------------------|-------------|-------------|-------------|-------------|-------------|--|
| 0.889420443 | 1                                                                                                                                                                          | 0.95293602  | 0.986535338 | 0.726010976 | 0.850391279 | 1           |  |
| 0.725314717 | 0.662219569                                                                                                                                                                |             | 0.897733899 | 1           |             | 1           |  |
|             |                                                                                                                                                                            | 1           | 0.60033392  | 0.49233856  | 0.54193806  |             |  |
| 0.55382992  | 0.531697576                                                                                                                                                                | 1           | 1.391922144 | 1.04192096  | 1.790612685 |             |  |
| 0.870434861 | 1                                                                                                                                                                          | 1.10387227  | 0.986189682 |             | 1.328858952 | 0.529691074 |  |
| 1.105037457 |                                                                                                                                                                            |             |             |             |             |             |  |
| YHR208W     | "YHR208W::BAT1::branched-chain amino acid transaminase, highly similar to mammalian ECA39, which is regulated by the oncogene myc"                                         |             |             |             |             | 1           |  |
| 1.121562085 | 0.925290205                                                                                                                                                                | 0.884658806 |             | 1           | 1.07702635  | 0.995097607 |  |
| 0.701765233 | 0.850268076                                                                                                                                                                | 1           | 1.216810055 | 0.901021254 | 0.548023629 |             |  |
| 0.829140482 | 1                                                                                                                                                                          | 1.016948914 | 0.464239474 |             | 0.854774183 | 1           |  |
| 0.49573396  | 0.253364776                                                                                                                                                                | 0.240863655 | 0.654621171 |             |             | 0.751047202 |  |
| 0.81432275  | 0.998641622                                                                                                                                                                | 0.652586686 | 1           | 1.689684182 | 1.359077524 |             |  |
| 2.407949942 |                                                                                                                                                                            | 1           |             | 0.873721769 |             | 1.01635981  |  |
| 0.602743701 | 0.946549518                                                                                                                                                                |             |             |             |             |             |  |
| YFL018C     | YFL018C::LPD1::an FAD flavoprotein which contains a pair of redox-active cysteines involved in the transfer of reducing equivalents from the FAD cofactor to the substrate |             |             |             |             | 1           |  |
| 0.722539246 | 1                                                                                                                                                                          | 0.941950701 | 1.129220307 |             | 0.969345919 | 1           |  |
| 0.882502415 | 0.978121218                                                                                                                                                                | 0.920309913 | 0.965672184 | 1           |             | 1.620014023 |  |
| 1.333975901 | 1.435342289                                                                                                                                                                | 1.116418918 | 1           | 1.151735034 | 0.793633962 |             |  |
| 0.939409399 | 1.311795483                                                                                                                                                                | 1           | 0.903824552 | 0.797342571 |             | 0.902605519 |  |
| 1.127416608 | 1                                                                                                                                                                          | 1.154784213 | 0.807245304 | 1.056675376 | 0.864011931 |             |  |
| 0.629638031 | 1                                                                                                                                                                          | 0.860892704 | 0.63078602  | 0.751907049 | 0.53304182  |             |  |
| 1.32554448  | 0.912400256                                                                                                                                                                |             |             |             |             |             |  |
| YHR210C     | YHR210C::YHR210C::molecular_function unknown                                                                                                                               |             |             |             |             | 0.92346525  |  |
| 0.983938778 | 0.948187797                                                                                                                                                                | 0.872261352 |             | 1.010957854 | 0.944608536 |             |  |
| 1.025913539 |                                                                                                                                                                            | 0.830680461 | 0.822903823 | 0.810984811 | 0.79102314  | 1           |  |
| 1.522435148 | 1.645514394                                                                                                                                                                | 1.766414622 | 1.387917818 | 1           | 0.972174527 |             |  |
| 2.055712813 | 1.077244666                                                                                                                                                                |             | 1           | 1.097501306 | 1.352395745 | 1.427375293 |  |
| 0.946090521 | 1.246305841                                                                                                                                                                | 1           | 1.184966013 | 1.48258939  | 0.914472116 |             |  |
| 0.588834335 | 0.729984187                                                                                                                                                                | 1           | 1.367805232 | 1.397394732 |             | 1.216606151 |  |
| 1.088372011 | 1.277535408                                                                                                                                                                |             |             |             |             |             |  |
| YFL020C     | YFL020C::PAU5::member of the seripauperin protein/gene family (see Gene_class PAU)                                                                                         |             |             |             |             | 1           |  |
| 1.047534476 | 1.199156537                                                                                                                                                                |             | 1.423721338 | 1           | 1.243852922 | 1.378495419 |  |
| 2.221451539 | 1.346699906                                                                                                                                                                | 1           | 1.428448669 | 1.398654939 | 1.74302197  |             |  |
| 1.798078501 | 1                                                                                                                                                                          | 1.492405414 | 2.270103662 | 2.062363343 | 0.900162631 | 1           |  |
| 1.048234042 | 1.15318533                                                                                                                                                                 | 0.955888024 | 1.025396168 | 0.934488491 | 1           |             |  |
| 0.876845795 | 1.51999076                                                                                                                                                                 | 1.20620535  | 1.340230841 | 1.738267583 | 1           |             |  |
| 1.119625008 | 1.24674799                                                                                                                                                                 | 1.343337203 | 1.350991972 | 1.718900043 | 1.678571256 |             |  |
| YIL005W     | YIL005W::EPS1                                                                                                                                                              |             |             |             |             | 1           |  |
| 0.773480408 | 1                                                                                                                                                                          | 0.752657679 | 0.940735277 | 0.642113602 | 0.629641262 | 1           |  |
| 0.81144526  | 0.91345599                                                                                                                                                                 | 0.419521293 | 0.846863073 | 1           | 0.995641741 |             |  |
| 0.808321429 | 0.936811263                                                                                                                                                                | 0.666497521 | 1           | 1.03994689  | 1.008704434 |             |  |
| 0.828427926 | 0.876783934                                                                                                                                                                | 1           | 1.085142901 | 1.212585545 | 1.06882712  |             |  |
| 1.034000566 | 0.952442849                                                                                                                                                                | 1           | 1.15425272  | 1.033411944 | 1.077330678 |             |  |
| 0.920334024 | 0.860979085                                                                                                                                                                | 1           | 0.922259498 | 0.92888081  | 1.023001375 |             |  |
| 0.890930069 | 0.992623943                                                                                                                                                                | 0.80732532  |             |             |             |             |  |
| YFL022C     | "YFL022C::FRS2::Phenylalanyl-tRNA synthetase, beta subunit, cytoplasmic"                                                                                                   |             |             |             |             | 1           |  |
| 0.983831621 | 0.944794299                                                                                                                                                                | 0.637463129 | 0.635089738 | 1           | 0.808545436 |             |  |
| 0.773464906 | 0.629460665                                                                                                                                                                | 0.632511072 | 1           | 1.057905652 | 1.190802259 |             |  |
| 0.757677445 | 1.167222457                                                                                                                                                                | 1           | 0.905936297 | 0.672412093 | 0.887703959 |             |  |
| 1.107478437 | 1                                                                                                                                                                          | 1.108300928 | 0.873871624 | 1.190851912 | 1.158959915 |             |  |
| 0.766520995 | 1                                                                                                                                                                          | 0.871884599 | 0.70531372  | 0.597120217 | 0.646314044 |             |  |

0.526550542 1 0.927896093 0.861691577 0.992458288 0.962610682  
0.849756661 0.873872775

YFL024C "YFL024C::EPL1::Enhancer of Polycomb-Like (from *D. melanogaster*). Subunit of the Nucleosomal Acetyltransferase of H4 complex (NuH4). May be required for silencing in *S. cerevisiae*, based on analogous functions within other eukaryotes." 1 1.348734108 1.453906601  
1.657484658 1.595845729 1 1.363104667 1.512725044 1.402918008  
1.495008858 1 1.298590908 1.479279792 1.536392564 1.548151034 1  
2.240989079 2.667149882  
0.807639319 1  
1.460114622 0.825853184 1.912362829

YFL024C "YFL024C::EPL1::Enhancer of Polycomb-Like (from *D. melanogaster*). Subunit of the Nucleosomal Acetyltransferase of H4 complex (NuH4). May be required for silencing in *S. cerevisiae*, based on analogous functions within other eukaryotes." 1 1.106584449 1.023617125  
1.220716594 0.965220675 0.92986434 1 1.773276697  
1 0.921809834 0.929701238 0.891719935 1.036962839 1.565615701

YFL038C YFL038C::YPT1::involved in the secretion pathway at the ER-to-Golgi step; required for sporulation 1 0.965661008 1.220431171 1.041173344  
1.405504522 1 0.960362504 1.088709859 1.506247492 1.547805133 1  
0.876241971 1.248356083 1.486652945 1.371770488 1 0.9210915  
0.832730822 0.870698107 2.141761767 1 1.619046126 1.751536014  
2.041217325 1.693965075 1 1.217718884 1.280561751 1.572783541  
1.150852663 1.253722407 1 1.079603913 1.880750397 1.267113232  
1.143911989 1.717651257 1 1.150609458 1.217308353 1.149842492  
1.260382222 1.326920651 1.244261707

YFL040W YFL040W::molecular\_function unknown 1 1.283397515  
1.314136304 1.413474603 1.334042952 1 1.356747724 1.571605628  
1 2.022494282 1.912582549 1.670426274 1 0.961116677  
0.754690925 1.117284297 1 1.440953258 7.643066508  
1.750477713 1 1.047927489 1.223342031 1.173157688 1  
0.860643929 2.739283096 1 0.825063725 1.061344821  
1.279502507 0.69400495 1.743963917 0.895763354

YIL007C YIL007C::molecular\_function unknown 1 0.939765444  
1.392433088 1.065703468 1.376657331 1 1.11869664 1.08023267  
1.433406863 1 1.1719764 1.68764765 1.405185699 1  
1.252716111 1.005283207 1.527162827 1.505133141 1 1.034670378  
1.690767012 2.085829526 1.203200181 1 1.11832387 1.242225718  
1.01677768 0.944143201 1.1783863 1 1.067798134 0.992551113  
1.320848355 1.25075654 1.116738973 1 1.278628678 1.034728254  
1.15218855 1.042408973 1.390316468 1.278411073

YIL009W "YIL009W::FAA3::acyl-CoA synthetase (long-chain fatty acid CoA ligase) (fatty acid activator 3), activates endogenous but not imported fatty acids and provides substrates for N-myristoylation" 1 0.782263517  
0.607036624 0.903923377 0.60334651 1 0.866046746 0.800087447  
0.566404817 0.662076297 1 0.707469637 0.592933 0.345541175  
0.738151755 1 0.795058029 0.516985651 0.682935539 1  
0.591724012 0.406408291 0.440325834 0.535009106 1 1.174156408  
0.927565785 0.973551959 1.015860124 0.99955158 1 1.172542201  
0.946540385 0.794820274 0.654715757 0.398746309 1 1.149060889  
0.965491818 0.725536872 0.62780808 0.583109482 1.23375425

YIL011W YIL011W::TIR3::TIP1-related 1 1.409080084 1.303258918  
0.93460561 1.13548155 1 1.180655625 1.00196032 1.018615892  
0.999843494 1 1.232915375 0.970322482 1.191392959 1.039532459 1  
0.769560599 0.611864303 0.550304026 0.901469055 1 0.981650397

0.963493514 0.614520191 0.782592928 1 1.122567545 0.884727322  
 0.959323394 1.417595644 1.016657832 1 0.851346865 0.904395014  
 0.662207171 0.859359394 0.894786926 1 0.798083305 0.74139488  
 0.731482479 1.009398557 0.959747228 0.991206341  
 YFL042C YFL042C::YFL042C::molecular\_function unknown 1 0.718973642  
 0.902765683 0.902549676 0.660129134 1 0.995884858 1.170545657  
 0.956923574 0.71229297 1 1.437410133 1.645399958 1.161895525  
 1.04242359 1 2.258613717 1.081876189 1.751334228 1  
 2.037203365 3.545875376 2.518515282 1.842818458 1 1.459137768  
 1.683042427 2.512871776 1.223750811 1.190672093 1 1.920109904  
 1.775018911 2.800342647 1.97796301 0.970700317 1 1.626907252  
 1.592044163 1.26650631 0.778972242 1.512552044 0.98245011  
 YIL013C "YIL013C::PDR11::ATP-dependent permease, member of ATP-binding  
 cassette (ABC) transporter family" 1 1.727184543 1.502823044 1.631063618  
 1.678780975 1 1.618254132 1.354446154 1.500557186 1  
 1.372180416 1.664912354 1.649113356 1.672172963  
 0.790790925 1 0.445371808  
 0.925291758 0.763851702 1  
 1.131957742 0.807342197 2.007478068 0.542252365 10.41029368  
 YIL013C "YIL013C::PDR11::ATP-dependent permease, member of ATP-binding  
 cassette (ABC) transporter family"  
 1 0.910459173 0.816380023 0.886708891  
 1.0199047 0.942039736 1 0.938402769 0.80817941 0.789085311  
 0.563241765 0.838257573 1.101051423 0.764292483  
 1.045845379  
 YFL044C YFL044C::YFL044C::molecular\_function unknown 0.863132156  
 0.840447656 1.120382263 0.827228833 0.914099634 1.034675813  
 1.11563317 0.970157349 0.921102846 1.312626857 1.043529446  
 1.091572744 1 1.110512108 1.01989285 1.444370939 1.687642916 1  
 1.42491883 2.072228497 2.281592318 1.232585316 1 1.112140339  
 1.685280656 1.686246166 0.993326936 1.017950387 1 1.066492282  
 1.292101528 1.530812373 0.959610215 0.481114683 1 1.232875143  
 1.357067897 1.231552766 0.604863011 1.026981815 1.024480042  
 YIL015W YIL015W::BAR1::extracellular protease synthesized in a-cells that  
 cleaves and inactivates alpha factor 1 1.159335108 1  
 1.473112898 1 0.969569562 1  
 1.068141324 0.798578939 0.929534407 0.818226722 0.895244416  
 0.608311169 0.747521394 1.059955676 0.904594842  
 1 0.760608584 0.692742701 0.874987408 1.198415848 0.87204257  
 0.816028394 0.642801323 0.718887286  
 YFL046W YFL046W::YFL046W::molecular\_function unknown 0.96902287  
 1.306224195 0.784938517 1.385241098 0.900781653 0.845754119  
 1.648275064 1.21300642 0.940392926 1.09473706 1.290096832  
 1.004442736 1 1.257259084 0.954382779 1.097275474 1.715571613 1  
 1.184607151 1.71716059 1.774982142 0.886188548 1 0.630287356  
 0.709650119 0.312856655 0.495244304 0.740488474 1 1.038488336  
 1.241866769 0.915041626 1.271015516 3.190831801 1 0.9543751  
 1.153370096 0.957154019 1.66823192 1.684292778 1.555108244  
 YIL029C YIL029C::YIL029C::molecular\_function unknown 1.072450967  
 1.034046735 0.958251115 0.955473755 0.901992366 1.034675813  
 1.228256442 1.100255102 1.010319615 1.059832407 1.256208506  
 1.017169605 1 1.161516249 1.485317996 2.422936706 1.634616749 1  
 1.278509889 3.228455914 4.602490188 1.584372233 0.817142899  
 0.968902625 0.969311347 1 1.096784294  
 0.974916087 1.259955435

YIL031W YIL031W::ULP2::Peptidase that removes SUMO-conjugates from proteins  
1 0.723564701 0.818876254 1.181253626 0.863658143 1 0.991249834  
1.104423195 0.806012065 0.749150946 1 0.857128748 0.826933258  
0.521068924 1 1.193038538 0.726202928  
0.378354261 1 0.833961528 0.934631252 0.999341847  
0.857491433 1.090057414 0.842181958 1.017939695 1.162025937  
0.828126582 1 1.218799309 1.003223409 1.165985158 0.849018693  
1.022322933 0.894887689  
YFL048C YFL048C::EMP47::47 kDa type I transmembrane protein localized to the  
Golgi 0.946859695 0.965717653 1.037639458 1.085676589 0.975846761  
0.930329557 1.154057569 1.061845274 0.869260691 1.0312741  
0.8764245 1.072971901 1 1.369445558 1.304482876 1.375655497  
1.065132991 1 1.516324342 1.220731098 1.707208339 1.032684049 1  
0.985878199 1.088925303 0.9147109 0.95062879 0.919278197 1  
1.159379977 1.662918965 0.997698998 1.007104783 1.278770413 1  
1.410386023 1.5138927 0.965036245 1.274951155 1.241332732 0.921156488  
YIL033C "YIL033C::BCY1::Involved in heat shock resistance, glycogen  
accumulation, and sporulation" 1 0.812704486 0.899621852 1.065604792  
0.556536957 1 1.016600549 1.117639521 0.936931064 0.979862588 1  
0.948197434 1.220131896 1.468232013 0.891160215 1 2.737409111  
2.696244082 2.737235492 1.186731753 1 1.479122719 1.221956577  
1.137699181 1.384659595 1 1.115036989 1.214976711 1.645184378  
1.163061425 0.925115996 1 1.14899166 0.929382214 1.234077168  
1.03468045 0.735832643 1 1.171029028 0.981464002 1.06985622  
0.788030814 1.243333545 0.824837783  
YFL062W "YFL062W::COS4::Protein with strong similarity to subtelomerically-  
encoded proteins such as Cos5p, Ybr302p, Cos3p, Cos1p, Cos4p, Cos8p, Cos6p,  
Cos9p" 1 1.295244961 0.999326213 1.057766696 1.148202755 1  
1.134984143 1.057876606 1.073357331 1.150904368 1 1.10182274  
1.119450498 1.385581673 1.008888582 1 2.385565582 2.175004501  
2.603026355 2.947365691 1 1.184713611 1.582520063 2.126166112  
1.572395127 1 1.038334662 1.056296864 1.190012357 1.077021263  
0.959077551 1 0.989227779 1.239560812 0.978952272 0.861477453  
1.025648228 1.233995697 1.196936678 1.070843605 1.276353734  
1.238779706 1.484182726  
YIL035C YIL035C::CKA1::alpha subunit of casein kinase II 1  
0.716751693 0.842323539 0.888264243 1.108168656 1 0.707508618  
0.807471477 0.870685118 1.035412241 1 0.744324489 0.830737636  
0.778419876 0.85996823 1 1.402152052 0.967540658 1.008071009  
1.111327199 1 1.677106502 1.553094068 1.480854727 1  
0.939360345 1.121013773 0.933542913 0.797180061 0.944606144 1  
1.087435781 1.196745778 1.074327366 0.982681628 1.199708464 1  
1.163903486 1.229597616 1.094002394 1.218950091 1.401687379 1.196102433  
YFL064C YFL064C::YFL064C::molecular\_function unknown 1.239905971  
0.961162371 1.404391423 0.641224667 1.556996224 1.73654191  
0.874486835 0.766957116 1.177902462 1.233298031 0.507157627  
1.119963468 1 0.622868049 0.526308082 0.718008882 0.689975369 1  
0.580797512 0.448004177 0.615563387 1 0.720003669 0.706115352  
1.005522233 1.164476066 0.900025383 1 0.737488412 0.43457896  
0.76593385 1.105148332 0.451435677 1 0.622188566 0.547489029  
0.97780332 0.514919279 0.754787878  
YIL037C YIL037C::PRM2::pheromone-regulated membrane protein 1  
1.394210757 1.269145663 1.034202977 1.176183314 1 1.310487975  
1.143387422 1.255292381 1 1.204215797 1.234234549 1.126801227  
1.348607485 1  
1.096535393 1.080969479 0.981492304 0.915083082

|         |                                                                                                                                                                                                                                                        |             |             |             |             |             |
|---------|--------------------------------------------------------------------------------------------------------------------------------------------------------------------------------------------------------------------------------------------------------|-------------|-------------|-------------|-------------|-------------|
|         | 1.139136323                                                                                                                                                                                                                                            |             | 1           |             | 1.121762802 |             |
|         | 1.060729178                                                                                                                                                                                                                                            | 1.172460524 |             |             |             |             |
| YFL066C | YFL066C::YFL066C::molecular_function                                                                                                                                                                                                                   | unknown     | 1           | 0.666285986 |             |             |
|         | 0.629821999                                                                                                                                                                                                                                            | 0.837624403 | 0.313882241 | 1           | 0.956044307 | 1.04341544  |
|         | 0.564587018                                                                                                                                                                                                                                            | 0.440829138 | 1           | 0.880169679 | 0.878714544 | 0.192210831 |
|         | 0.705374328                                                                                                                                                                                                                                            | 1           | 0.881917008 | 0.632558719 | 0.97053909  | 0.657070454 |
|         | 0.819408915                                                                                                                                                                                                                                            | 0.461983938 | 0.506968569 | 0.58429585  | 1           | 0.66153118  |
|         | 0.798982283                                                                                                                                                                                                                                            | 0.986850885 | 0.959185906 | 0.757310885 | 1           | 0.884133154 |
|         | 0.524104331                                                                                                                                                                                                                                            | 0.876452344 | 1.255697421 | 0.470173176 | 1           | 0.713412063 |
|         | 0.661570605                                                                                                                                                                                                                                            | 0.971037864 | 0.564810346 | 0.864345076 | 0.541135607 |             |
| YFL068W | YFL068W::YFL068W::molecular_function                                                                                                                                                                                                                   | unknown     | 1           | 0.777320271 |             |             |
|         | 0.875804452                                                                                                                                                                                                                                            | 0.80696471  | 0.625755478 | 1           | 0.938055185 | 0.966843092 |
|         | 0.858331599                                                                                                                                                                                                                                            | 0.945758126 | 1           | 0.902969969 | 0.87034395  | 1.131735794 |
|         | 0.80977646                                                                                                                                                                                                                                             | 1           | 0.950975122 | 0.549567704 | 1.009971483 | 1.119688911 |
|         | 0.857017389                                                                                                                                                                                                                                            | 0.921118364 | 0.914273417 | 0.878405532 | 1           | 0.859699339 |
|         | 0.996248823                                                                                                                                                                                                                                            | 1.871457655 | 1.422694881 | 1.100529168 | 1           | 0.898706504 |
|         | 0.996789319                                                                                                                                                                                                                                            | 1.411926324 | 0.990951054 | 1           | 1.100552273 | 1.04411405  |
|         | 1.370505994                                                                                                                                                                                                                                            | 1.073278945 | 1.52871882  | 0.87825089  |             |             |
| YFR002W | "YFR002W::NIC96::Part of complex at nuclear pore containing in addition NSP1p, NUP49p, and p54"                                                                                                                                                        |             | 1           | 0.763639714 | 0.821532259 | 0.971200982 |
|         | 0.755001163                                                                                                                                                                                                                                            | 1           | 0.926313132 | 0.958244546 | 0.821747771 | 0.70194899  |
|         | 0.756046944                                                                                                                                                                                                                                            | 0.784109371 | 0.463153007 | 0.913374905 | 1           | 0.563308516 |
|         | 0.792302305                                                                                                                                                                                                                                            | 0.806448049 | 0.927180503 | 1           | 0.965651995 | 1.143144989 |
|         | 0.788594646                                                                                                                                                                                                                                            | 1.207028996 | 1           | 0.917851842 | 1.068322247 | 1.008815877 |
|         | 0.997299687                                                                                                                                                                                                                                            | 1.058607237 | 1           | 1.007276463 | 0.773129833 | 0.728206357 |
|         | 0.807221772                                                                                                                                                                                                                                            | 0.829302365 | 1           | 1.020148384 | 0.957034666 | 0.969635724 |
|         | 0.962882022                                                                                                                                                                                                                                            | 0.952231967 | 1.06651008  |             |             |             |
| YFR004W | YFR004W::RPN11::Suppressor of mutant (ts on glycerol) tRNA gene deficient in the processing of its 3'-end; homologous to S. pombe PAD1 gene - global positive regulator of nuclear transcription and is involved in maintenance of chromatin structure |             | 1           | 0.763560726 | 1.069835795 | 0.905957995 |
|         | 1.044339733                                                                                                                                                                                                                                            | 1           | 0.855835627 | 0.884876547 | 1.209262667 | 0.998181915 |
|         | 0.781028557                                                                                                                                                                                                                                            | 1.189839013 | 1.549619405 | 0.987445231 | 1           | 1.215331764 |
|         | 1.072960738                                                                                                                                                                                                                                            | 1.655491484 | 1.979211751 | 1           | 1.743713025 | 2.86570991  |
|         | 3.249102542                                                                                                                                                                                                                                            | 1.62362533  | 1           | 1.019447725 | 1.549712662 | 1.165237834 |
|         | 0.910917055                                                                                                                                                                                                                                            | 0.978671922 | 1           | 1.076771291 | 1.382202829 | 1.156998839 |
|         | 0.767740843                                                                                                                                                                                                                                            | 1.311056247 | 1           | 1.306955307 | 1.71764237  | 1.243920811 |
|         | 1.394311224                                                                                                                                                                                                                                            | 1.384775257 | 1.158450512 |             |             |             |
| YPL189W | YPL189W::GUP2::Involved in active glycerol uptake                                                                                                                                                                                                      |             | 1           |             |             |             |
|         | 1                                                                                                                                                                                                                                                      | 1.32387256  | 1.751933772 |             | 1           |             |
|         | 1                                                                                                                                                                                                                                                      | 0.916605191 |             | 1.224891918 |             | 0.130386708 |
|         | 1                                                                                                                                                                                                                                                      |             | 0.936978848 | 0.937182092 | 1           |             |
|         | 0.689876172                                                                                                                                                                                                                                            | 0.953028921 | 1.63829991  | 1.441644913 | 1           | 0.725227349 |
|         | 1.087962286                                                                                                                                                                                                                                            | 0.621205291 | 1.117313127 |             |             |             |
| YPL191C | YPL191C::YPL191C::molecular_function                                                                                                                                                                                                                   | unknown     | 1           | 0.999649136 |             |             |
|         | 0.983893311                                                                                                                                                                                                                                            | 1.329403857 | 1.170582416 | 1           | 1.220128935 | 1.344461065 |
|         | 1.02276786                                                                                                                                                                                                                                             | 1           | 1.352874653 | 1.249173971 | 0.942111679 | 1.148435777 |
|         | 1.464946985                                                                                                                                                                                                                                            | 1.850310977 | 1.031793845 | 1.51007837  |             | 0.698500228 |
|         | 0.934935256                                                                                                                                                                                                                                            | 1           | 0.884685729 | 1.36724818  | 1.243101351 | 0.990382853 |
|         | 1.071066821                                                                                                                                                                                                                                            | 1           | 1.043883927 | 1.160400569 | 1.754632604 | 1.849925351 |
|         | 1.15733028                                                                                                                                                                                                                                             | 1           | 1.721046291 | 1.732882701 | 0.697032168 | 1.522433744 |
|         | 1.036738829                                                                                                                                                                                                                                            |             |             |             |             |             |
| YPL205C | YPL205C::YPL205C::molecular_function                                                                                                                                                                                                                   | unknown     | 1           | 0.7767113   |             |             |
|         | 0.853618028                                                                                                                                                                                                                                            | 1.124933234 | 0.805413855 | 1           | 1.012188788 |             |
|         | 0.905188489                                                                                                                                                                                                                                            | 1           | 1.094976785 | 0.948579529 | 0.553969774 | 0.984001438 |
|         | 1.989870819                                                                                                                                                                                                                                            |             | 1.799990714 |             |             | 1           |
|         | 0.898655069                                                                                                                                                                                                                                            | 0.958766288 | 1.008305048 | 1.178297416 | 1.398675804 | 1           |

|         |                                                                                                                   |             |             |             |             |             |             |
|---------|-------------------------------------------------------------------------------------------------------------------|-------------|-------------|-------------|-------------|-------------|-------------|
|         | 0.781573952                                                                                                       | 0.548454691 | 0.679338612 | 0.821948145 | 0.522522709 | 1           |             |
|         | 1.001413082                                                                                                       | 0.612950436 | 1.249193569 | 0.528072493 | 0.905089603 |             |             |
| YPL207W | YPL207W::YPL207W::molecular_function unknown                                                                      |             |             |             |             | 1           | 0.901550252 |
|         | 0.807988711                                                                                                       | 0.990065846 | 0.797373501 | 1           | 0.819494286 | 0.833850467 |             |
|         | 0.919388657                                                                                                       | 0.821066387 | 1           | 0.666351202 | 0.44951818  | 0.333296137 |             |
|         | 0.973815719                                                                                                       | 1           | 0.625255192 | 0.319557175 | 0.333409985 | 0.342713361 | 1           |
|         | 0.599324701                                                                                                       | 0.318933464 | 0.29032335  | 0.603767867 | 1           | 0.829788993 |             |
|         | 0.606490939                                                                                                       | 0.570176862 | 1.218691833 | 0.95729071  | 1           | 0.766893577 |             |
|         | 0.385832801                                                                                                       | 0.308489823 | 0.541786859 | 1.134527817 | 1           | 0.598623097 |             |
|         | 0.383010683                                                                                                       | 0.673813531 | 0.897366984 | 0.463443883 | 0.718011674 |             |             |
| YPL209C | YPL209C::IPL1::Regulation of yeast chromosome segregation                                                         |             |             |             |             | 1           |             |
|         | 0.417161937                                                                                                       | 0.610409121 | 1           |             | 0.452463886 |             | 1           |
|         | 0.368532497                                                                                                       | 0.405014566 |             | 0.578800651 | 1           | 0.462745144 |             |
|         | 0.233314444                                                                                                       | 1           |             |             |             |             |             |
|         | 1                                                                                                                 |             |             |             |             |             |             |
|         | 1.020101927                                                                                                       |             |             |             |             |             |             |
| YPL211W | YPL211W::NIP7::Nip7p is required for 60S ribosome subunit biogenesis                                              |             |             |             |             |             |             |
|         | 1                                                                                                                 | 1.487784614 | 1.050686941 | 0.851050629 | 1.331043948 | 1           | 0.922884468 |
|         | 0.776470037                                                                                                       | 1.249374844 | 1.432772928 | 1           | 0.724308152 | 0.474195008 |             |
|         | 0.543685102                                                                                                       | 1.093379894 |             |             | 0.335860982 | 0.214105295 | 0.71102961  |
|         |                                                                                                                   | 0.330561682 | 0.783763657 | 1           | 1.087859047 | 0.801634399 | 1           |
|         | 0.846930739                                                                                                       | 1.173636392 | 1.040235685 | 1           | 0.807433186 | 0.843119464 |             |
|         | 0.472660185                                                                                                       | 0.883625332 | 1.353848959 | 1           | 0.959325066 | 0.7104801   |             |
|         | 0.805741884                                                                                                       | 1.443948145 | 0.506873123 | 1.42026211  |             |             |             |
| YPL213W | YPL213W::LEA1::Looks Exceptionally like U2A                                                                       |             |             |             |             | 1           | 0.939107524 |
|         | 1.072008366                                                                                                       | 1.147160296 | 1.667050137 | 1           | 1.031563444 | 1.28694472  |             |
|         | 1.505609378                                                                                                       | 1           | 0.919540352 | 0.980748856 | 1.245580705 | 1.152807674 | 1           |
|         | 0.902459808                                                                                                       | 1.012788252 | 0.824921082 | 1.299986022 |             |             |             |
|         | 1                                                                                                                 | 1.023080031 | 1.051280963 | 0.905703739 |             | 1.087225837 | 1           |
|         | 0.99940688                                                                                                        | 1.407252504 |             |             | 1           | 1.366473704 |             |
|         | 1.3092672                                                                                                         | 1.161077402 |             |             |             |             |             |
| YPL215W | YPL215W::CBP3::Protein required for assembly of ubiquinol cytochrome-c reductase complex (cytochrome bc1 complex) |             |             |             |             | 1           | 0.937923598 |
|         | 1.069148399                                                                                                       | 1.012131806 | 1.255137764 | 1           | 0.980952425 | 1.221638414 |             |
|         | 1.185289266                                                                                                       | 1           | 0.852782435 | 0.935458347 | 1.119041145 | 1.007229853 | 1           |
|         | 0.979796706                                                                                                       | 0.72914621  | 0.959653079 | 1.084657789 | 1           | 2.292739967 |             |
|         | 1.765439192                                                                                                       | 1.710653737 | 1.683185126 | 1           | 0.97765365  | 0.972508723 |             |
|         | 0.719035241                                                                                                       | 0.952480323 | 1.000182027 | 1           | 0.90372087  | 0.815900167 |             |
|         | 0.722094409                                                                                                       | 0.654364371 | 1.247273155 | 1           | 1.228470221 | 0.99960998  |             |
|         | 1.220722434                                                                                                       | 1.732228275 | 2.153211876 | 1.269654842 |             |             |             |
| YPL229W | YPL229W::YPL229W::molecular_function unknown                                                                      |             |             |             |             | 1           | 1.073185683 |
|         | 0.978642648                                                                                                       | 0.87414804  | 1.006134674 | 1           | 1.231968078 | 1.032454112 |             |
|         | 0.819482476                                                                                                       | 0.987618424 | 1           | 1.252622668 | 1.083829317 | 1.271358889 |             |
|         | 0.746373345                                                                                                       | 1           | 0.850499669 | 0.705436735 | 0.70870207  | 1           |             |
|         | 1.10016223                                                                                                        | 1.317029069 | 1.222612401 | 1.309207854 | 1           | 1.027736815 |             |
|         | 0.85102952                                                                                                        | 0.922001524 | 0.775390414 | 1.149967538 | 1           | 0.922704996 |             |
|         | 1.043603817                                                                                                       | 1.045031576 | 0.748950269 | 0.899175673 | 1           | 1.305710098 |             |
|         | 1.095647119                                                                                                       | 1.294505568 | 1.189799201 | 1.206928438 | 1.09453     |             |             |
| YPL231W | YPL231W::FAS2::Trifunctional enzyme                                                                               |             |             |             |             | 1           | 1.099523403 |
|         | 1.006068637                                                                                                       | 0.663534483 | 1           | 0.988844901 | 0.884059655 | 0.721813274 |             |
|         | 0.82615154                                                                                                        | 1           | 1.113386221 | 0.854017861 | 0.604921502 | 0.910719711 | 1           |
|         | 0.836077714                                                                                                       | 0.579043193 | 0.690619457 | 0.59858612  | 1           | 0.750962082 |             |
|         | 0.41485802                                                                                                        | 0.580438462 | 0.475347909 | 1           | 1.6360152   | 1.106034774 |             |
|         | 1.4586948                                                                                                         | 1.90200501  | 1.321147349 | 1           | 1.104946197 | 0.721601044 |             |
|         | 0.580184853                                                                                                       | 0.728551149 | 0.709651326 | 1           | 0.783146912 | 0.763375255 |             |
|         | 0.85105477                                                                                                        | 0.904036343 | 0.628357943 | 0.779305347 |             |             |             |

|         |                                                      |             |             |             |
|---------|------------------------------------------------------|-------------|-------------|-------------|
| YFR018C | YFR018C::YFR018C::molecular_function                 | unknown     | 1           | 0.699570576 |
|         | 0.72821079                                           | 0.674358724 | 0.346179323 | 1           |
|         | 0.836805585                                          | 0.937239833 |             |             |
|         | 0.7889157                                            | 0.757652665 | 1           | 0.915010885 |
|         | 0.878147753                                          | 1.015910138 |             |             |
|         | 0.801838906                                          | 1           | 0.363435486 | 0.268895339 |
|         | 0.674646794                                          | 0.703835011 | 1           |             |
|         | 0.665801122                                          | 2.014081956 | 0.706528426 | 1           |
|         | 0.869699387                                          | 0.942395176 |             |             |
|         | 1.33223486                                           | 1.641637326 | 1.244896141 | 1           |
|         | 0.599412257                                          | 0.350284422 |             |             |
|         | 0.81937142                                           | 1.590083228 | 0.609756141 | 1           |
|         | 0.762877205                                          | 0.417592535 |             |             |
|         | 1.128793532                                          | 0.565810203 | 0.948348955 | 0.625195524 |
| YFR020W | YFR020W::YFR020W::molecular_function                 | unknown     | 1           | 1.044092053 |
|         | 0.919544063                                          | 0.992046445 | 1           | 0.956960982 |
|         | 1.043802332                                          | 1.021218078 | 1           |             |
|         | 0.90115524                                           | 1.047683961 | 1.246107916 | 0.866828363 |
|         | 1                                                    | 0.518720927 |             |             |
|         | 0.482140757                                          | 0.872675561 | 1.07354563  | 1           |
|         | 1.104624545                                          | 3.611056843 |             |             |
|         | 2.318473516                                          | 1.222234764 | 1           | 1.040876471 |
|         | 1.431308588                                          | 1.585304764 |             |             |
|         | 1.082589917                                          | 1.215890169 | 1           | 1.387072086 |
|         | 1.407190107                                          | 0.955686438 |             |             |
|         | 1.205622271                                          | 1           | 1.162350328 | 1.453591711 |
|         | 1.464315967                                          | 1.0408541   |             |             |
|         | 1.381005168                                          | 1.112918128 |             |             |
| YFR022W | YFR022W::YFR022W::molecular_function                 | unknown     | 1           | 0.94145303  |
|         | 0.888704006                                          | 0.832028356 | 0.711487825 | 1           |
|         | 0.923824674                                          | 1.023383746 |             |             |
|         | 0.744674476                                          | 0.74324617  | 1           | 1.00166616  |
|         | 0.978825346                                          | 0.769379441 | 1           |             |
|         | 0.952077792                                          | 0.883303253 | 1.524360662 | 1.032578632 |
|         | 1                                                    | 0.874186473 |             |             |
|         | 1.439810383                                          | 0.686687288 | 1           | 1.011485624 |
|         | 0.858946699                                          | 1.036774851 |             |             |
|         | 1.04227104                                           | 0.947783242 | 1           | 0.869393115 |
|         | 0.709115397                                          | 1.066181775 |             |             |
|         | 0.907675226                                          | 0.87352727  | 1           | 0.783745249 |
|         | 0.770938362                                          | 0.964589664 |             |             |
|         | 0.860918353                                          | 1.245912863 | 0.973693878 |             |
| YFR024C | YFR024C::YFR024C::molecular_function                 | unknown     | 1           | 0.891579191 |
|         | 1.199171852                                          | 1.024091225 | 0.970316239 | 1           |
|         | 0.949388339                                          | 0.950867047 |             |             |
|         | 0.99504471                                           | 1.084836369 | 1           | 1.197136842 |
|         | 1.393400883                                          | 1.421092494 |             |             |
|         | 0.941383906                                          | 1           | 1.846729101 | 1.617329849 |
|         | 1.903479032                                          | 1.8318172   | 1           |             |
|         | 2.082628427                                          | 2.160174143 | 2.344388891 | 1.394200054 |
|         | 1                                                    | 1.567661312 |             |             |
|         | 2.099160609                                          | 2.367615671 | 1.213156112 | 1.121175315 |
|         | 1                                                    | 1.559994179 |             |             |
|         | 2.357317893                                          | 2.408777817 | 1.222800423 | 0.780585996 |
|         | 1                                                    | 1.441492317 |             |             |
|         | 1.748706973                                          | 1.00133862  | 0.779643186 | 1.030195282 |
|         | 1.089276219                                          |             |             |             |
| YFR026C | YFR026C::YFR026C::molecular_function                 | unknown     | 1           | 1.234979382 |
|         | 1.257595825                                          | 1.122897455 | 1.45938964  | 1           |
|         | 0.994805119                                          | 1.011014245 |             |             |
|         | 1.575895473                                          | 1           | 1.069022999 | 1.034432824 |
|         | 1.628037765                                          | 1.350452753 |             |             |
|         | 0.267115492                                          | 0.430362406 | 0.612008045 | 1           |
|         | 1.415899833                                          | 2.87220199  |             |             |
|         | 2.390603963                                          | 1.312963417 | 1           | 0.690946786 |
|         | 0.968323524                                          | 0.730457915 |             |             |
|         | 0.997603323                                          | 1           | 0.785494399 | 1.00219802  |
|         | 0.705096224                                          | 0.750319613 |             |             |
|         | 1.178554958                                          | 1.13687084  | 0.892032773 | 1.403625311 |
| YFR028C | YFR028C::CDC14::Required for mitosis and sporulation | 1           |             |             |
|         | 0.821811929                                          | 0.752294003 | 0.851816755 | 0.849351292 |
|         | 1                                                    | 0.879039772 |             |             |
|         | 0.833416554                                          | 0.829894204 | 0.842064673 | 1           |
|         | 0.772574604                                          | 0.697109403 |             |             |
|         | 0.62164721                                           | 0.86650503  | 1           | 0.528995557 |
|         | 0.374662212                                          | 0.431069966 |             |             |
|         | 0.553047419                                          | 1           | 1.055453921 | 1.06761689  |
|         | 1.038903079                                          | 1.131908244 | 1           |             |
|         | 0.8431853                                            | 0.787578351 | 0.738161865 | 0.806446199 |
|         | 0.788703034                                          | 1           |             |             |
|         | 0.756411023                                          | 0.62422866  | 0.687402478 | 0.667772176 |
|         | 0.947363021                                          | 1           |             |             |
|         | 0.724712484                                          | 0.694113581 | 0.853810417 | 0.762635321 |
|         | 0.989618453                                          | 1.071763756 |             |             |
| YFR041C | YFR041C::YFR041C::molecular_function                 | unknown     | 1           | 1.028734187 |
|         | 1.26725682                                           | 1.099383767 | 1.71882533  | 1           |
|         | 0.998363014                                          | 0.997492088 |             |             |
|         | 1.48083204                                           | 1.315754274 | 1           | 1.128467486 |
|         | 1.234642724                                          | 1.464496611 |             |             |
|         | 1.243506614                                          | 1           | 1.477212249 | 1.244116701 |
|         | 1.177591603                                          | 1.330728221 | 1           |             |
|         | 1.869364695                                          | 1.688314915 | 1.561402895 | 1.104834526 |
|         | 1                                                    | 1.135729098 |             |             |
|         | 1.458836275                                          | 0.969707285 | 0.665532811 | 1.123041756 |
|         | 1                                                    | 1.196140947 |             |             |
|         | 1.903922669                                          | 1.735242486 | 1.388452254 | 1.64202569  |
|         | 1                                                    | 1.527841691 |             |             |
|         | 1.553953234                                          | 1.264378626 | 1.521243434 | 1.719697511 |
|         | 2.093617012                                          |             |             |             |
| YFR043C | YFR043C::YFR043C::molecular_function                 | unknown     | 1           | 1.220946215 |
|         | 1.348408174                                          | 0.978753072 | 1.372390746 | 1           |
|         | 1.009635303                                          | 0.930627775 |             |             |

1.522793885 1.334592873 1 1.38723891 1.354154878 2.008295255  
1.282145283 0.484903062 0.404540642 0.508860637 1  
2.321078382 2.945572079 1 0.936293103 1.083290117  
0.859291124 0.765323022 0.938963091 1 0.922466539 1.45611129  
1.178205711 1 1.246329822 1.337842808 1.346609381  
1.69422855 1.543725122  
YFR045W YFR045W::YFR045W::molecular\_function unknown 1 1.136134328  
1.376577171 1.041643734 1.247789346 1 1.008359399 1.056598209  
1.495949947 1.190323681 1 1.146034184 1.401712878 1.854785281  
1.209401522 1 1.675525732 1.74542357 1.703938214 1  
2.524856181 3.269174752 3.011233707 1.730615206 1 1.098672506  
1.195765834 1.270417763 1.162731478 1.15720516 1 1.457726462  
1.480185609 1.164117259 0.908316569 1.27858846 1  
0.903393118 1.289444856 0.956424451 1.146191829  
YFR047C YFR047C::BNA6::Biosynthesis of Nicotinic Acid 1 1.552123042  
1.583659345 1.278960988 1.320862285 1 1.222039197 1.212528137  
1.278616577 1.272574007 1 1.52089821 1.813261139 1.446757161  
0.578905332 0.400212021 0.521546832 1.189785028  
0.756002224 0.257650762 1 1.053801926 0.88233148 1.044899989  
1.173723765 1.114976293 1 1.62769268 1.727230601 1.033680449  
1.082689264 1.470051855 1.062418063 1.18695036 0.867858906  
0.730562399 1.044619396  
YPL233W YPL233W::NSL1::Nfn1 Synthetic Lethal 1 0.865594772  
0.802866671 0.6921311 0.886252888 0.88309915 0.797637957  
0.735981422 0.989823848 0.8006918 0.685948256 1.091572744  
1 0.875353585  
0.912094229 0.960800197 0.789324681 0.823221978 1 0.910030438  
1.070793657 1.030913308 1 0.88982667 0.764481607 1.045942865  
0.428127957 1.274915818 1.048997512  
YPL235W "YPL235W::RVB2::RUVB-like protein, TIP49b Homologue" 1  
0.695434127 0.739571008 0.784607104 0.600741122 1 0.880390097  
0.75789302 0.710980137 0.656333682 1 0.639473745 0.686902409  
0.512893849 0.915273349 1 0.683980515 0.351528984 0.64564755  
0.755880105 1 0.910190299 0.597446398 0.756370127 1  
0.831791314 0.857375824 0.86946951 0.922815706 0.906703551 1  
0.868226541 0.7090748 0.737752477 0.744802408 0.766195426 1  
0.905197277 0.800922968 0.919744425 0.655785814 0.831251369 0.601553668  
YPL237W YPL237W::SUI3::eIF2 is a heterotrimeric GTP-binding protein <br>  
SUI2 encodes the alpha subunit<br> GCD11 encodes the gamma subunit 1  
1.20729422 1.053394603 1.028629154 1.539287714 1 1.048101876  
0.878770502 1.408763286 1 0.832213753 0.904965378 0.933447228  
0.993268527 2.473843121 1.787567718 1.662274724 1  
0.677284598 1 0.750339295 0.918570235 0.807476198  
0.860990087 0.976796544 1 1.052579184 0.835284053 0.684822538  
0.793297317 0.733946122 1 0.996762856 0.710492784 0.712636291  
0.793367107 0.875273525 0.83446968  
YPL239W YPL239W::YAR1::YAR1 encodes a 200-amino-acid protein with two ANK  
repeat motifs and an acidic C terminus rich in PEST-like sequences 1  
0.756449452 1.067716561 0.718913764 1.156216586 1 0.768070916  
0.921932748 1.043568771 1 0.716660163 0.565495334 1.35077639  
1.209683413 0.626371848 0.456184139 1.162127694  
1.062129916 1 1.013556028 0.94254807 0.752902465  
0.963217574 1 1.111800671 1.007696768 0.87870309 1.225269892  
2.021246662 1 1.034018074 0.96660404 1.010886873 1.268602502  
0.829487695 1.435147787  
YPL253C YPL253C::VIK1::<u>v</u>egetative <u>i</u>nteraction with  
<u>K</u>ar3p 0.89397216 0.968314432 0.814502225



|         |                                                                  |             |             |             |             |             |             |             |
|---------|------------------------------------------------------------------|-------------|-------------|-------------|-------------|-------------|-------------|-------------|
|         | 0.937103459                                                      |             | 0.95652809  |             | 0.896990229 | 0.915982918 |             |             |
|         | 0.781770689                                                      | 0.985841893 |             |             |             |             |             |             |
|         | 1                                                                | 0.958937036 | 0.774429104 | 1.052941953 | 1.040832278 | 1.102731157 | 1           |             |
|         | 1.199238211                                                      | 1.070499962 | 0.851079742 | 1.055828914 | 0.965129026 | 1           |             |             |
|         | 0.939040983                                                      | 0.971735552 | 0.769181066 | 0.935994412 | 0.69897808  | 1.275784183 |             |             |
| YPL255W | YPL255W::BBP1::Involved in mitotic cell cycle and meiosis        |             |             |             |             |             | 1           |             |
|         | 0.49783171                                                       | 0.602338431 |             | 0.70319669  | 1           | 0.637061937 |             |             |
|         | 0.910465356                                                      | 0.793509454 | 1           | 0.425869341 | 0.550217654 | 0.666120689 |             |             |
|         | 0.631243211                                                      | 1           | 0.538424276 | 0.172044436 | 0.892817817 | 0.894503234 | 1           |             |
|         | 1.194779373                                                      | 0.970681264 | 0.969375509 | 0.983544737 |             | 0.992897075 |             |             |
|         | 1.136695248                                                      | 0.86079775  | 0.93562055  | 1.422868653 | 1           | 0.828585322 |             |             |
|         | 0.741633491                                                      | 0.88131341  | 0.901131099 | 1.076282707 | 1           | 0.873835817 |             |             |
|         | 0.657734535                                                      | 0.990018436 | 0.566515646 | 1.106997536 | 0.760041607 |             |             |             |
| YPL257W | YPL257W::YPL257W::molecular_function unknown                     |             |             |             |             |             | 1           | 1.037431876 |
|         | 1.256893543                                                      |             | 1.16340944  | 1           | 0.899270231 | 1.012133017 | 0.834973717 |             |
|         | 0.86708443                                                       | 1           | 1.140344417 | 1.324508026 | 1.242259682 | 0.972557408 |             |             |
|         | 0.307565                                                         |             |             |             |             | 1           | 0.99976136  |             |
|         | 1.371565772                                                      | 1.317374204 |             | 1.244619445 | 1           | 0.972967816 | 0.901111468 |             |
|         | 1.471457184                                                      | 1.096547292 | 1.04057525  | 1           | 1.076947667 | 0.759437379 |             |             |
|         | 1.048670538                                                      | 0.499618065 | 1.141579392 | 0.908897701 |             |             |             |             |
| YPL259C | YPL259C::APM1::medium subunit of the clathrin-associated protein |             |             |             |             |             |             |             |
| complex | 1                                                                | 0.702663708 | 0.766399443 | 0.836529726 | 0.731043169 | 1           |             |             |
|         | 0.917590357                                                      | 0.816392532 | 0.752443429 | 1           | 0.81891527  | 0.847264865 |             |             |
|         | 0.49852631                                                       | 0.799190286 | 1           | 0.854599479 | 0.633659232 | 0.944512237 | 1           |             |
|         | 1.635380728                                                      | 1.030315293 | 1.511301391 | 1.869277758 | 1           | 0.980790536 |             |             |
|         | 0.912329543                                                      | 1.140585879 | 0.969574194 | 1.031647973 | 1           | 1.210418989 |             |             |
|         | 1.114339139                                                      | 1.324629169 | 1.076341592 | 1.061219074 | 1           | 1.383971978 |             |             |
|         | 0.965714259                                                      | 1.127097585 | 0.797626558 | 1.264712808 | 0.869494607 |             |             |             |
| YPL261C | YPL261C::YPL261C::molecular_function unknown                     |             |             |             |             |             |             | 0.928390408 |
|         | 1.05568427                                                       |             |             | 1.058840233 |             |             |             |             |
|         | 1.10918146                                                       | 1.013292891 | 1.044697997 | 1           |             |             |             |             |
|         | 0.689263445                                                      |             |             | 1           | 0.851200255 | 0.871746575 |             |             |
|         | 0.975837088                                                      | 0.981999356 | 1           | 0.76513003  | 0.732872618 | 0.993390375 |             |             |
|         | 0.677919945                                                      | 0.709064017 | 1           | 1.422958672 | 0.912165594 | 1.461735913 |             |             |
|         | 0.102030038                                                      | 1.20226542  |             |             |             |             |             |             |
| YPL263C | "YPL263C::KEL3::Kelch-repeat protein, similar to Kel1 and Kel2"  |             |             |             |             |             | 1           |             |
|         | 0.780149541                                                      | 0.709791217 | 1.025804468 | 0.712115257 | 1           | 0.815248944 |             |             |
|         | 0.840018269                                                      | 0.885860987 | 0.948564688 | 1           | 0.666131258 | 0.458275085 |             |             |
|         | 0.41433189                                                       | 1.095823756 | 1           | 0.37345171  |             | 0.420058492 | 1           |             |
|         | 0.52876569                                                       | 0.449850793 | 0.419591121 | 0.61545806  | 1           | 0.833754932 |             |             |
|         | 0.588867376                                                      | 0.729080077 | 1.014144246 | 0.87701396  | 1           | 0.926716679 |             |             |
|         | 0.534605495                                                      | 0.539571165 | 0.819020455 | 0.814863234 | 1           | 0.765594576 |             |             |
|         | 0.459813194                                                      | 0.855372429 | 0.587942643 | 0.569223732 | 0.825713448 |             |             |             |
| YFR049W | YFR049W::YMR31::mitochondrial ribosomal protein (precursor)      |             |             |             |             |             | 1           |             |
|         | 1.453209711                                                      | 1.677668639 | 1.264451944 | 1.980711021 | 1           | 1.251615762 |             |             |
|         | 1.300091618                                                      | 1.861654207 | 1.696571747 | 1           | 1.141629821 | 1.76355056  |             |             |
|         | 2.82205337                                                       | 1.320501024 | 1           | 2.222934536 | 1.796759931 | 2.168298632 |             |             |
|         | 2.113838617                                                      | 1           | 1.974167354 | 2.916731715 | 2.711405739 | 1.372949592 | 1           |             |
|         | 0.972188726                                                      | 1.281028896 | 0.736283939 | 0.612850311 | 0.797773131 | 1           |             |             |
|         | 1.153260786                                                      | 1.761782254 | 1.24931014  | 1.019643682 | 1.838986386 | 1           |             |             |
|         | 1.574022195                                                      | 2.149611775 | 1.196692886 | 2.188567276 | 1.796995145 | 1.633038768 |             |             |
| YFR051C | YFR051C::RET2::coatomer (COPI) complex delta subunit             |             |             |             |             |             | 1           |             |
|         | 0.878104961                                                      | 0.763387748 | 0.607952577 | 0.385234603 | 1           | 0.892750502 |             |             |
|         | 0.970119848                                                      | 0.549354724 | 0.488338796 | 1           | 0.959334058 | 0.925012453 |             |             |
|         | 0.840627874                                                      | 0.461804849 |             | 1.458432001 | 1.356976835 | 1.356717506 |             |             |
|         | 1.016345992                                                      | 1           | 0.804981109 | 0.923025307 | 0.585001296 | 0.583581451 | 1           |             |
|         | 1.057647701                                                      | 0.923187109 | 0.997157202 | 0.956139061 | 0.720786964 | 1           |             |             |

0.877161847 0.944011915 0.729771587 0.763765499 0.670722932 1  
 0.919967773 1.071840356 1.063296212 0.761517626 0.970638655 0.761792884  
 YGL008C YGL008C::PMA1::Major regulator of cytoplasmic pH. Part of the P2  
 subgroup of cation-transporting ATPases; functions physiologically to pump  
 protons out of the cell. 1 0.921198235 0.446752566 0.894997167  
 0.4290135 1 1.028552721 1.047937798 0.406452097 0.591388368 1  
 0.755595625 0.50708325 0.215329047 0.531884263 1 1.473295581  
 1.203633486 1.388212957 0.332800564 1 0.448336404 0.196251615  
 0.133862306 0.334343727 1 0.904624487 0.593259949 1.003213577  
 1.803795551 0.730127915 1 0.433243697 0.30749484 0.319915386  
 0.462695235 0.164268583 1 0.846305244 0.410828918 0.843085071  
 0.578915877 0.661898202 0.388777061  
 YGL010W YGL010W::YGL010W::molecular\_function unknown 1 1.342117606  
 1.442288682 0.963758874 1.315056598 1 1.095880934 0.977050582  
 1.482417937 1.090259344 1 1.159291674 1.347194493 2.303413049  
 1.092964858 1 1.13771395 0.918760341 1.474151008 1.839829508 1  
 1.873916715 2.607094159 3.727912546 1.54361325 1 1.16919955  
 1.664123253 1.15328545 1.080050067 1.039575507 1 0.684402324  
 0.802038975 0.858633697 0.487406814 1.353303748 1 1.054816189  
 1.205094101 0.791325625 1.156313484 1.337940476 1.339704695  
 YGL012W YGL012W::ERG4::Sterol C-24 reductase 1 1.026281097  
 0.717979858 0.751833751 0.625843642 1 0.845259224 0.859749949  
 0.803181422 0.758369528 1 0.873631174 0.748551494 0.624118409  
 0.697156509 1 0.864461453 0.888840401 0.994474827 0.815058224 1  
 0.930058335 0.626730226 0.762320157 0.897466853 1 1.295200188  
 0.975201755 1.344048268 1.995210766 1.06003049 1 0.771967993  
 0.941403513 1.162920471 1.168577186 0.885138209 1 1.097195225  
 0.846666136 1.305148595 1.089162483 1.135967213 1.544600787  
 YGL014W YGL014W::PUF4::member of the PUF protein family 1 1.247318244  
 0.964021706 1.217987338 0.957010325 1 1.29672539 1.163420205  
 0.973580156 0.783974585 1 1.182474591 0.91809398 0.493346536  
 1.03064755 1 0.888494181 0.496318496 0.712941686 0.470417985 1  
 0.742318848 0.51959123 0.286897321 0.746372976 1 0.903763932  
 0.777644549 1.032106564 1.245145468 0.735697533 1 0.695514469  
 0.486785483 0.642799441 0.685562209 0.399794114 1 0.57602077  
 0.513124797 0.904291367 0.653877554 0.669198089 0.641832375  
 YGL016W YGL016W::KAP122::Member of the karyopherin-beta family with possible  
 role in nuclear transport and regulation of pleiotropic drug resistance. 1  
 0.914141566 0.733120491 1.085502582 0.810946453 1 1.145515448  
 1.011251669 0.832930819 0.754248322 1 0.817385381 0.627886019  
 0.376600399 0.910677989 1 0.407376607 0.293778499 0.480958158  
 0.481577297 1 0.445101927 0.493019377 0.292771475 0.647622882 1  
 0.87612782 0.740778907 0.916398632 1.157818518 0.857408623 1  
 0.871039666 0.518131505 0.627526339 0.723535054 0.6350695 1  
 0.780077664 0.522577128 0.838448472 0.86963959 0.626297662 0.995584457  
 YGL018C YGL018C::JAC1::may be involved in assembly/maturation of  
 mitochondrial iron-sulfur proteins 1 0.989095177 1.226096366 0.99296788  
 1.491019633 1 1.030385779 1.051456979 1.40793018 1  
 1.066342485 0.991066727 1.475715507 1.447814246 1 0.661369927  
 1.08162935 1 1.459232359 3.153686916 2.183008945 1.492666944  
 0.87938639 1 1.144081277 1.431053201 1.419483435  
 2.355617882 1 1.116477898 1.111086184  
 YGL032C YGL032C::AGA2::adhesion subunit of a-agglutinin 1  
 1 1.086230109 1.350663613 1 1.252126375  
 1.511437491 1.07188924 1 0.996445808 0.462877101 0.597044518  
 0.887052095 1 1.336132791 1.377791683 1.099423986 1.288311441 1

|         |                                                                                                                          |               |               |                                       |
|---------|--------------------------------------------------------------------------------------------------------------------------|---------------|---------------|---------------------------------------|
|         | 0.958604304                                                                                                              | 1             | 0.87802424    | 1                                     |
|         | 0.838543908                                                                                                              | 0.548972485   | 0.554270006   |                                       |
| YGL034C | YGL034C::YGL034C::molecular_function unknown                                                                             |               |               | 1 1.475445221                         |
|         | 1.48117483                                                                                                               | 1.386300005   | 1.498307778   | 1 1.149155951 1.138630999             |
|         | 1.420692324                                                                                                              | 1.266053529   | 1 1.281995045 | 1.11216221 1.551060336                |
|         | 1.311046154                                                                                                              |               | 0.449722762   | 0.770678555                           |
|         | 0.53378279                                                                                                               | 1.073926584   | 0.893709385   | 0.575885813 0.916229468 1             |
|         | 0.880507492                                                                                                              | 1.006760857   | 1.088210371   | 1.04016904 1.346985293 1              |
|         | 0.836534503                                                                                                              | 0.768547147   | 0.784841072   | 0.731506476                           |
| YML033W | YML033W 1 2.032669912 2.026654401                                                                                        |               |               | 1.676129185 2.022515274 1             |
|         | 1.614806345                                                                                                              | 1.697164167   | 2.121643922   | 1 1.654349853 1.595708442             |
|         | 2.086331698                                                                                                              | 1.396034319   | 1 1.056717907 | 0.953190007 1                         |
|         | 1.125302356                                                                                                              |               | 1 0.976413925 | 0.956327256 0.864391559               |
|         | 0.930056298                                                                                                              | 1.008534039   | 1 0.840899246 | 0.955019651 0.900729896               |
|         | 0.930645483                                                                                                              | 1.247774633   | 1 1.07931812  | 1.166331986 0.942293451               |
|         | 1.472126186                                                                                                              | 1.0824624     | 0.986828225   |                                       |
| YML035C | YML035C::AMD1::putative alpha-mannosidase 1                                                                              |               |               | 0.821890956                           |
|         | 0.805929932                                                                                                              | 0.992662008   | 0.654195774   | 1 0.926194413 1.058487219             |
|         | 0.741463208                                                                                                              | 0.753294712   | 1 0.813737843 | 0.830394339 0.69654346                |
|         | 0.847994943                                                                                                              | 1 0.946634633 | 0.915359153   | 1.043116554 0.890504065 1             |
|         | 0.735588042                                                                                                              | 0.801081075   | 0.891730015   | 1.017375479 1 0.806389565             |
|         | 0.719193774                                                                                                              | 0.925516376   | 0.96956972    | 0.878935724 1 0.95727743              |
|         | 0.651869264                                                                                                              | 0.897505575   | 0.940528608   | 0.55586546 1 0.885558681              |
|         | 0.736382781                                                                                                              | 0.836523736   | 0.738092278   | 0.797002051 0.689116088               |
| YML038C | YML038C::YMD8::similar to vanadate resistance protein Gog5 1                                                             |               |               |                                       |
|         | 1.102319039                                                                                                              | 0.778343735   | 0.999994592   | 0.865564583 1 1.079434448             |
|         | 0.928479352                                                                                                              | 0.693582939   | 0.857145781   | 1 1.176358958 0.907799852             |
|         | 0.573879144                                                                                                              | 0.935299689   | 1 1.437325416 | 0.635362151 0.91776113                |
|         | 0.886971662                                                                                                              | 1 0.881829401 | 0.635044093   | 0.393167348 0.520459498 1             |
|         | 1.417770921                                                                                                              | 1.24039084    | 1.824936401   | 1.266341221 1.096394324 1             |
|         | 1.434498529                                                                                                              | 1.337553667   | 1.943837447   | 0.942134938 0.73250477 1              |
|         | 1.408671307                                                                                                              | 1.09211662    | 0.865832633   | 0.976819373 0.794267371 0.800320314   |
| YML055W | "YML055W::SPC2::subunit of signal peptidase complex, homologous to mammalian protein SPC25"                              |               |               | 1 1.128687736 1.337987032 1.144795382 |
|         | 1.423192101                                                                                                              | 1 1.087957649 | 1.056491139   | 1.40616839 1.410929116 1              |
|         | 0.963521931                                                                                                              | 1.220852443   | 1.43328654    | 1.319576277 1 1.290521825             |
|         | 0.722671254                                                                                                              | 1.111451121   | 1.058587125   | 1 1.585024648 1.917026364             |
|         | 1.374232186                                                                                                              | 1.375710038   | 1 1.025321346 | 1.309882152 0.997425253               |
|         | 1.035372174                                                                                                              | 1.099002604   | 1 0.985954895 | 1.526812841 1.304213764               |
|         | 1.28716731                                                                                                               | 1.308425202   | 1 1.095698937 | 1.605188915 1.017655602               |
|         | 1.176829576                                                                                                              | 1.17456432    | 1.307306659   |                                       |
| YML058W | YML058W::SML1::Suppressor of mec lethality                                                                               |               |               | 1 2.020847159                         |
|         | 1.66140667                                                                                                               | 1.260350499   | 1.780639246   | 1 1.355190194 1.189724208             |
|         | 1.566393281                                                                                                              | 1.912782402   | 1 1.370334907 | 1.300318985 1.789311099               |
|         | 1.289720175                                                                                                              | 1 0.87077741  | 0.804226592   | 0.970012844 1.106252784 1             |
|         | 1.15919216                                                                                                               | 1.532751438   | 1.501049174   | 1.096260448 1 1.316094382             |
|         | 1.114605319                                                                                                              | 1.673904636   | 1.928386406   | 0.802515064 1 0.651680934             |
|         | 0.68148607                                                                                                               | 0.586605027   | 0.56687674    | 0.69849098 1 0.90435669               |
|         | 0.933254928                                                                                                              | 1.049201873   | 1.025644996   | 0.869622694 1.802034269               |
| YML060W | "YML060W::OGG1::Excises 7,8-dihydro-8-oxoguanine (8-OxoG) when 8-OxoG is opposite cytosine or thymine (but not adenine)" |               |               | 1 1.486370452                         |
|         | 1.176619888                                                                                                              | 1.127471866   | 0.804074      | 1 1.457253569 1.182939183             |
|         | 0.937730636                                                                                                              | 0.991276295   | 1 1.481084102 | 1.508426496 1.223951243               |
|         | 0.882877406                                                                                                              | 1 1.201249807 | 0.690375255   | 0.882333555 0.744686171 1             |
|         | 1.082547576                                                                                                              | 0.881683133   | 0.838109939   | 1 1.134770215 0.88665097              |
|         | 0.77862282                                                                                                               | 0.974366463   | 0.971811141   | 1 0.995334112 1.194851971             |

|         |                                                                                                  |             |             |             |             |                         |
|---------|--------------------------------------------------------------------------------------------------|-------------|-------------|-------------|-------------|-------------------------|
|         | 1.070975619                                                                                      | 1.183270099 | 1           | 0.936118873 | 0.733267445 | 1.126754128             |
|         | 0.621207549                                                                                      | 1.377356512 |             |             |             |                         |
| YML062C | YML062C::MFT1::Protein involved in mitochondrial import of fusion proteins                       |             |             |             |             |                         |
|         | 1                                                                                                | 0.691032308 |             | 1.077340555 | 1.282310584 | 1 0.874313956           |
|         | 0.956994381                                                                                      |             | 1           | 0.922682667 | 1.097989403 | 1.19012781              |
|         | 1.080620852                                                                                      | 1           | 0.676266098 | 0.669690581 | 0.730777907 | 1.086199823 1           |
|         | 1.39552751                                                                                       | 1.805343355 | 2.656985791 | 1.627098606 | 1           | 0.773508535             |
|         | 1.082234433                                                                                      | 0.678313845 | 0.581070945 | 1.055289169 | 1           | 1.07345374              |
|         | 1.455573633                                                                                      | 1.518642443 | 1.521016741 | 1.77851372  | 1           | 1.059287101             |
|         | 1.172336415                                                                                      | 1.074047481 | 1.302211774 | 1.108905293 | 1.210988006 |                         |
| YPL277C | YPL277C::YPL277C::molecular_function unknown                                                     |             |             |             |             |                         |
|         | 1                                                                                                |             |             |             |             | 0.952549617             |
|         | 0.810154637                                                                                      |             | 0.746183733 | 1           | 1.430078319 | 0.890737329 0.857399866 |
|         | 0.943117896                                                                                      | 1           | 1.161502048 | 1.002547961 | 1.205773733 | 1.124882287 1           |
|         | 0.727636616                                                                                      |             | 0.665624503 | 0.691264795 | 1           | 1.270981118 1.171524605 |
|         | 1.182065534                                                                                      | 1.944055579 | 1           | 1.204925759 | 1.582980429 | 1.444037477             |
|         | 1.283249823                                                                                      | 1           | 1.055616285 | 1.398326748 | 2.419008291 | 1.916822261             |
|         | 0.739548958                                                                                      | 1           | 1.41444271  | 1.166857743 | 1.242459108 | 0.308514843             |
|         | 1.120094928                                                                                      | 1.276659744 |             |             |             |                         |
| YML064C | YML064C::TEM1::Gtp-binding protein of the ras superfamily involved in termination of M-phase     |             |             |             |             |                         |
|         | 1                                                                                                |             |             | 0.892880097 | 1.113273763 | 0.956576883             |
|         | 1.141323321                                                                                      | 1           | 1.009479423 | 1.052156249 | 1.313078467 | 1.170218709 1           |
|         | 0.883006443                                                                                      | 1.009920112 | 1.078285973 | 1.179830364 | 1           | 0.802038442             |
|         | 0.757588266                                                                                      | 0.959983419 | 0.825284936 | 1           | 1.094211212 | 1.034097025             |
|         | 1.157079243                                                                                      | 0.843776343 | 1           | 1.092785113 | 1.092414173 | 1.024080134             |
|         | 1.364396763                                                                                      | 1.241124975 | 1           | 0.791637455 | 0.564602587 | 0.587038021             |
|         | 0.967112756                                                                                      | 0.667441705 | 1           | 0.793130788 | 0.569743764 | 0.770403851             |
|         | 0.691619903                                                                                      | 0.781384415 | 0.769673503 |             |             |                         |
| YPL279C | YPL279C::YPL279C::molecular_function unknown                                                     |             |             |             |             |                         |
|         | 1                                                                                                |             |             |             |             | 1.194717665             |
|         | 0.809574428                                                                                      | 0.9249344   | 0.824789217 | 1           | 0.828267913 | 0.816970564             |
|         | 0.764482254                                                                                      | 0.739540124 | 1           | 0.954864698 | 0.613515352 | 0.589284995             |
|         | 0.669733562                                                                                      | 1           | 0.423163692 | 0.456155834 | 0.568747762 | 0.441669244 1           |
|         | 0.448590961                                                                                      | 0.588641699 | 0.511489817 | 0.47728005  | 1           | 0.756868612             |
|         | 0.606133722                                                                                      | 0.675494412 | 1.215628305 | 0.803018844 | 1           | 0.43301428              |
|         | 0.363393658                                                                                      | 0.386710909 | 0.443100258 | 0.404705649 | 1           | 0.550408058             |
|         | 0.350052094                                                                                      | 0.728573726 | 0.601049236 | 0.647829907 | 0.735524137 |                         |
| YML066C | YML066C::SMA2::Spore Membrane Assembly                                                           |             |             |             |             |                         |
|         | 1                                                                                                |             |             |             |             | 1.844924434             |
|         | 2.319391586                                                                                      | 1           | 1.848743356 | 2.114937123 | 1           | 1.391808541             |
|         | 1.455200027                                                                                      | 1.549277837 | 1           | 0.992789895 |             | 1.398866057             |
|         | 0.220027558                                                                                      |             | 0.376148349 | 1           | 0.991563482 | 1.044101789             |
|         | 0.947364741                                                                                      | 1.149663156 | 1.141944238 | 1           | 0.882589279 | 0.990956167             |
|         | 0.947372673                                                                                      | 1.014378492 | 1           | 0.999338819 | 1.088698344 | 0.907195065             |
|         | 1.55123968                                                                                       | 0.891601896 | 1.330072903 |             |             |                         |
| YPL281C | YPL281C::ERR2::enolase-related subtelomeric sequence (ERR1 and ERR2 code for identical proteins) |             |             |             |             |                         |
|         |                                                                                                  |             |             | 1.395048191 | 0.868918147 | 0.487526558             |
|         | 1.015800776                                                                                      | 1.023692004 |             | 0.713678945 | 1.264707998 | 1.31156909              |
|         | 0.877174171                                                                                      |             |             |             |             |                         |
|         | 0.75433087                                                                                       | 0.665477479 | 1.009932668 | 1.020909267 | 0.937744579 | 1                       |
|         | 0.616525723                                                                                      | 0.787418433 | 0.630118479 | 0.40400191  | 1           | 0.650454105             |
|         | 0.600531769                                                                                      | 1.13847614  | 0.205174319 | 0.785467175 | 0.67072796  |                         |
| YML082W | YML082W::YML082W::O-succinyl-L-homoserine (thiol)-lyase                                          |             |             |             |             |                         |
|         | 1                                                                                                |             |             |             |             | 1                       |
|         | 0.959334994                                                                                      | 1.008428391 | 1.043333237 | 0.968276317 | 1           | 1.051770033             |
|         | 1.216546371                                                                                      | 1.086732687 | 1.031263892 | 1           | 0.84259935  | 0.789557942             |
|         | 0.746910126                                                                                      | 0.967382678 | 1           | 0.489041086 | 0.561621089 | 0.563322037 1           |
|         | 0.604617921                                                                                      | 0.572020424 | 0.839464677 | 1           | 0.853048885 | 0.770064158             |
|         | 0.753511103                                                                                      | 0.904079768 | 0.937300631 | 1           | 0.789614973 | 0.905336563             |
|         | 0.661208579                                                                                      | 0.920191353 | 0.900532461 | 1           | 0.754834637 | 0.782061084             |
|         | 0.88374569                                                                                       | 0.955833755 | 0.630038921 | 0.87299711  |             |                         |

YPL283C YPL283C::YRF1-7::Y'-helicase protein 1 1 1.272209215  
0.870822554 0.985691929 1 1.046928006 0.727208938  
0.88210751 1 0.967832465 0.792279552 0.770319008 0.851861696  
1 0.719649563  
0.897404162 1.143262745 0.974642572 0.908167538 1 0.735714303  
0.764506276 0.813761241 1.162342507 0.767256905 1 0.749665411  
0.942558365 0.690752763 0.591922004

YPR002W "YPR002W::PDH1::prpD homologue; (62% identical to the prpD genes of  
<i>Escherichia coli</i> and <i>Salmonella typhimurium</i>, which play an unknown  
but essential role in propionate catabolism)" 1.431986766 1.597761651  
0.802754573 1.387494321 0.921835366 0.898195846  
1.735320527 1.002484784 1 0.726343642 1.487206343 1.520841754  
0.452860961 0.846867859 0.414198067 1 0.771866602 0.839461269  
1.752226406 1.291067368 1.154682399 1 0.693514477 0.730672225  
1.688000885 4.028239925 1.426495912 1 0.3811111037 0.579741133  
1.451600985 -0.022479185 0.885228271

YPR004C YPR004C::YPR004C::molecular\_function unknown 1 0.807914456  
0.727485873 0.801984269 0.669673416 1 0.778696261 0.75247338  
1.075579662 1 0.928383365 0.820067173 0.590493184 0.66599533 1  
0.904065208 0.550634377 0.778695396 1 1.96535636 1.386362608  
1.065026602 1.059435221 1 1.047107787 0.950720162 1.246446469  
1.171815302 0.969181728 1 0.944827829 0.814238632 0.934168013  
0.812225838 1.037120169 1 0.903614942 0.937143186 1.151944052  
0.97731134 1.612324418 0.901017134

YPR018W "YPR018W::RLF2::Chromatin Assembly Complex, subunit 1: largest (p90)  
subunit of three-subunit protein complex (yeast CAF-I) involved in DNA-  
replication-linked nucleosome assembly. Homol. to p150 subunit human Chromatin  
Assembly Factor-I (CAF-I)" 0.812649452 0.876889838 0.956014851  
0.836039499 0.822084336 0.874312076 1.009806187  
0.759548154 0.771075664 0.683611085 0.967241108 1 0.424704071  
0.429302071 0.687901243 1 0.785562015 0.992543716 0.828236987 1  
0.776834788 0.84725637 0.970422536 0.789150154 1.229335483 1  
1.988736717 2.302869819 2.265531124 2.764590754 1.922741492 1  
0.781688183 0.879639977 1.311362308 0.590963157 0.963405751 0.95705708

YPR020W YPR020W::ATP20::Protein associated with mitochondrial ATP Synthase;  
essential for dimeric state of ATP synthase 1 0.852760707 1.532820498  
1.218128544 2.201061838 1 1.100177633 1.192432846 1.545604449  
1.699016196 1 0.812137034 0.810082889 1.094356439 1.231085569 1  
1.400765469 1.08944643 0.778972968 2.286800341 1 2.512946493  
2.322247063 2.689575541 2.137578125 1 0.665349298 0.495616721  
0.302364589 0.499724943 0.759026939 1 0.775764724 0.739922046  
0.495934954 0.666977746 1.82451778 1 0.861331203 0.691218728  
0.693774696 1.710581078 2.065908067 1.474550829

YPR022C YPR022C::YPR022C::molecular\_function unknown 1 0.706347783  
0.625664706 0.593278148 1 0.784331599 0.870003466  
0.597195013 1 0.716824916 0.590377167 0.687697157 1  
0.491965435 1  
0.899227398 0.771857123 0.795129407 0.751427157 0.950585131 1  
1.272222752 0.83833241 1.069153879 1.065058306 0.935944149 1  
0.893280504 0.758555442 1.017868333 0.713976152 0.759913601 1.093654335

YPR024W YPR024W::YME1::Mitochondrial protein of the CDC48/PAS1/SEC18 family  
of ATPases 1 0.677374903 0.638350083 0.882636902 0.384124118 1  
0.804594884 0.967322384 0.617896445 0.645116383 1 0.954482971  
0.79703966 0.338992266 0.581006624 1 0.617721437 0.621482061  
0.411382338 1 1.122741773 1.208566517 0.953107393 1.370144463 1  
1.163080861 1.296837065 1.696515653 1.253498042 1.03866572 1

|         |                                                                                                                                                       |             |             |             |             |             |   |
|---------|-------------------------------------------------------------------------------------------------------------------------------------------------------|-------------|-------------|-------------|-------------|-------------|---|
|         | 1.134790098                                                                                                                                           | 0.835263209 | 1.017325032 | 0.63395535  | 0.369151369 | 1           |   |
|         | 1.16137565                                                                                                                                            | 0.692530366 | 0.822505124 | 0.394796184 | 0.662858206 | 0.640956762 |   |
| YGL036W | YGL036W::YGL036W::molecular_function                                                                                                                  | unknown     | 1           | 0.778327238 |             |             |   |
|         | 0.766267262                                                                                                                                           | 0.788483559 | 0.616080411 | 1           | 0.876729654 | 0.890265758 |   |
|         | 0.777062989                                                                                                                                           | 0.564788111 | 1           | 0.983968758 | 0.927881132 | 0.764123157 |   |
|         | 0.667663271                                                                                                                                           | 1           | 1.586495365 | 1.560946134 | 1.859210593 | 1.100090174 | 1 |
|         | 1.004070719                                                                                                                                           | 1.073011602 | 1.301580324 | 0.607267026 | 1           | 1.1230832   |   |
|         | 1.078441972                                                                                                                                           | 0.908719362 | 1.201291469 | 1.032378981 | 1           | 0.941178946 |   |
|         | 0.730571672                                                                                                                                           | 0.793778309 | 0.737237348 | 0.748651561 | 1           | 0.945241448 |   |
|         | 0.788942847                                                                                                                                           | 0.944993701 | 0.765331426 | 0.909928105 | 0.572658082 |             |   |
| YGL038C | YGL038C::OCH1::initiates the polymannose outer chain elongation of N-linked glycans                                                                   | 1           | 0.979137011 | 0.837521889 | 1.075911746 | 0.958713335 | 1 |
|         | 0.921427355                                                                                                                                           | 0.950579403 | 0.911564698 | 1.019388344 | 1           | 0.870641902 |   |
|         | 0.899327061                                                                                                                                           | 0.915953517 | 1.399081295 | 1           | 1.257614145 | 0.681121545 |   |
|         | 1.019231464                                                                                                                                           | 1.062774881 | 1           | 0.96027312  | 0.691779389 | 0.941181863 | 1 |
|         | 1.290403804                                                                                                                                           | 1.527765227 | 1.307477563 | 1.163090788 | 1.091492961 | 1           |   |
|         | 1.080917597                                                                                                                                           | 0.812867772 | 0.791682086 | 0.679998066 | 0.586364113 | 1           |   |
|         | 0.896886023                                                                                                                                           | 1.294940234 | 0.934206361 | 1.054315755 | 0.705752939 |             |   |
| YGL040C | "YGL040C::HEM2::converts delta-aminolevulinic acid to porphobilinogen, an intermediate in the synthesis of heme"                                      | 1           | 1.128404957 |             |             |             |   |
|         | 1.021305454                                                                                                                                           | 0.973831023 | 0.764385185 | 1           | 1.009087295 | 1.131083068 |   |
|         | 1.078299565                                                                                                                                           | 1.001714349 | 1           | 0.877890169 | 1.009923673 | 1.066753679 |   |
|         | 0.861370504                                                                                                                                           | 1           | 1.490427067 | 1.252926095 | 1.531017669 | 1.729554072 | 1 |
|         | 1.446308162                                                                                                                                           | 0.925461059 | 1.066484721 | 1.33353493  | 1           | 1.065466957 |   |
|         | 1.175548894                                                                                                                                           | 1.284128187 | 1.143999312 | 1.008207896 | 1           | 1.140177878 |   |
|         | 1.017610222                                                                                                                                           | 0.84900139  | 0.724895876 | 0.81737621  | 1           | 1.140097004 |   |
|         | 1.07720005                                                                                                                                            | 1.013352771 | 0.936858711 | 1.037605383 | 0.886131457 |             |   |
| YGL042C | YGL042C::YGL042C::molecular_function                                                                                                                  | unknown     | 1           | 0.84575233  |             |             |   |
|         | 1.271134809                                                                                                                                           | 0.786544462 | 1.152463161 | 1           | 0.784037357 | 0.921488886 |   |
|         | 1.328155538                                                                                                                                           | 1.17919085  | 1           | 0.823141627 | 0.986942549 | 1.282580024 |   |
|         | 0.98538624                                                                                                                                            | 1           | 0.793080799 | 0.634227515 | 0.722385005 | 1.388759846 | 1 |
|         | 1.599293562                                                                                                                                           | 2.645105599 | 2.294047673 | 1.050619816 | 1           | 0.928511866 |   |
|         | 0.829287826                                                                                                                                           | 0.501307543 | 0.59943802  | 0.871191944 | 1           | 1.240510528 |   |
|         | 1.453397247                                                                                                                                           | 1.00057193  | 1.203062622 | 1.759560564 | 1           | 1.131344222 |   |
|         | 1.59339063                                                                                                                                            | 1.352617336 | 1.374566235 | 1.252142274 |             |             |   |
| YGL056C | YGL056C::SDS23::homolog of pombe SDS23; localizes to spindle pole body                                                                                | 1           | 0.814929003 | 0.743483462 | 0.884463299 | 0.619624304 | 1 |
|         | 0.941526399                                                                                                                                           | 0.729648021 | 0.837566785 | 1           | 0.918028922 | 0.647037886 |   |
|         | 0.64201125                                                                                                                                            | 1           | 0.36235281  | 0.218374903 | 0.525618375 | 0.721296462 | 1 |
|         | 0.376357683                                                                                                                                           | 0.872447085 | 0.516576997 | 0.559005692 | 1           | 0.824568541 |   |
|         | 0.745394801                                                                                                                                           | 0.813733903 | 0.947410866 | 0.913767077 | 1           | 0.511961955 |   |
|         | 0.444578652                                                                                                                                           | 0.46423934  | 0.957831843 | 0.484561672 | 1           | 0.70342878  |   |
|         | 0.657706522                                                                                                                                           | 1.085214777 | 0.73338384  | 0.65314546  | 0.680359857 |             |   |
| YGL058W | YGL058W::RAD6::Involved in DNA repair and sporulation. Rad6p interacts with Ubr1 and Rad18p. mRNA is induced early in meiosis and peaks at meiosis I. | 1           | 0.821035251 | 0.895012859 | 0.741840219 | 0.912259402 | 1 |
|         | 0.752489015                                                                                                                                           | 0.719514952 | 1.025761478 | 0.99247404  | 1           | 0.827186527 |   |
|         | 0.835710284                                                                                                                                           | 1.028168079 | 0.921310526 | 1           | 0.780524555 | 0.569897458 |   |
|         | 0.766991982                                                                                                                                           | 1.082153315 | 1           | 1.392863448 | 1.3438552   | 1.270169952 |   |
|         | 0.745327256                                                                                                                                           | 1           | 1.138688937 | 1.183521528 | 0.91462012  | 0.957932165 |   |
|         | 0.997561268                                                                                                                                           | 1           | 1.07121647  | 1.151148253 | 0.911203982 | 0.89444381  |   |
|         | 1.369681119                                                                                                                                           | 1           | 1.117978306 | 1.33714271  | 1.102650977 | 1.29918984  |   |
|         | 1.30902576                                                                                                                                            | 1.092778775 |             |             |             |             |   |
| YGL060W | YGL060W::YGL060W::molecular_function                                                                                                                  | unknown*    | 1           | 0.939560705 |             |             |   |
|         | 0.833730727                                                                                                                                           | 0.982123691 | 0.81945233  | 1           | 1.080108135 | 1.163197233 |   |
|         | 0.874272095                                                                                                                                           | 0.809029051 | 1           | 1.054818217 | 0.86080054  | 0.621274631 |   |
|         | 1.033390092                                                                                                                                           | 1           | 0.764773949 | 0.504432193 | 0.676480196 | 0.78351384  | 1 |

|             |                                                  |             |             |             |             |
|-------------|--------------------------------------------------|-------------|-------------|-------------|-------------|
| 0.953571983 | 1.193148322                                      | 1.294481081 | 0.624119877 | 1           | 1.175953487 |
| 1.049421986 | 1.089684875                                      | 1.024236971 | 0.916850019 | 1           | 1.036459281 |
| 0.973291508 | 0.980452008                                      | 0.929600278 | 0.721176353 | 1           | 1.099136298 |
| 1.011898755 | 0.99172969                                       | 0.650409086 | 0.852292357 | 1.295047872 |             |
| YGL062W     | YGL062W::PYC1::converts pyruvate to oxaloacetate |             |             |             | 1           |
| 1.34808546  | 1.23384003                                       | 1.540240616 | 0.88876879  | 1           | 1.484576287 |
| 1.872063136 | 1.079961246                                      | 1.16554374  | 1           | 1.363021484 | 1.360369987 |
| 1.095926364 | 1.442182568                                      | 1           |             |             |             |
| 1           | 0.870885104                                      | 1.044768452 | 1.064621825 | 1.182543056 | 0.914241552 |
| 0.834632451 | 0.748727789                                      | 0.846052878 | 1.146151132 | 0.653734402 | 1           |
| 0.67045487  | 0.867068251                                      | 1.003480871 | 0.713670062 | 0.995446238 | 1.165455518 |
| YGL062W     | YGL062W::PYC1::converts pyruvate to oxaloacetate |             |             |             |             |
|             |                                                  |             |             | 1           | 1.0544452   |
| 1.363624058 |                                                  | 1           |             |             |             |
| 1.765772927 | 1.556445637                                      | 1.516826202 |             | 2.641757573 |             |
| YGL064C     | YGL064C::MRH4::mitochondrial RNA helicase        |             |             |             | 0.817574537 |
| 0.889416879 | 1.184116631                                      | 1.041623026 |             | 0.975846761 | 1.177465533 |
| 1.08414775  |                                                  | 0.877700078 | 0.783768293 | 0.80981626  | 1           |
| 0.517634197 |                                                  | 0.457719244 |             |             | 0.472501363 |
| 0.975162118 | 0.992370725                                      | 0.98028097  | 1.159824668 | 1.118833415 | 1           |
| 1.112736958 | 0.756590745                                      | 0.7928025   | 0.939936251 | 1           | 0.785279902 |
| 0.668415807 | 0.715429761                                      | 0.637008595 | 0.622071875 | 2.078731439 |             |
| YGL066W     | YGL066W::SGF73::SaGa associated Factor 73kDa     |             |             | 1           | 0.710209259 |
| 0.853839217 | 0.850544487                                      | 0.786595031 | 1           | 0.797970012 | 0.882542576 |
| 0.893295543 | 0.777090004                                      | 1           | 1.005157959 | 0.929793489 | 0.726031201 |
| 0.899218928 |                                                  | 1.002381152 | 0.895629262 | 0.656302675 | 1           |
| 1.284885513 | 1.380548037                                      | 1.198614557 |             | 1           | 0.819727285 |
| 0.676686246 | 0.65558898                                       | 0.723183691 |             |             |             |
|             | 1.045325834                                      | 0.686970783 | 0.527096266 |             | 3.815093658 |
| YGL066W     | YGL066W::SGF73::SaGa associated Factor 73kDa     |             |             |             |             |
|             |                                                  |             |             | 1           | 1.089060856 |
| 0.983527298 | 1.085512978                                      | 1.019086647 | 1.21226486  | 1           | 1.093211742 |
| 0.95743261  | 0.884699272                                      | 1.105769246 |             | 1           | 1.014454427 |
| 1.037046246 | 0.903695429                                      | 1.227624805 |             |             |             |
| YML084W     | YML084W::YML084W::molecular_function unknown     |             |             | 1           | 1.585435194 |
| 1.921601089 | 1.323712321                                      | 1.853188359 | 1           | 1.461236903 | 1.562066503 |
| 1.909787178 | 1.857331368                                      | 1           | 3.45930592  | 2.862111337 | 2.216586995 |
| 1.309487708 | 1                                                | 1.500219114 | 0.956606363 | 1.006864867 | 0.830428397 |
| 2.940128584 | 3.816504805                                      | 2.520424891 | 1.259554238 | 1           | 1.160482943 |
| 1.373120466 | 1.033872342                                      | 0.749857396 | 0.794675874 | 1           | 1.817325785 |
| 2.58750928  | 2.075573641                                      | 1.589988807 | 2.18135366  | 1           | 1.914847416 |
| 2.732762389 | 1.477450003                                      | 1.551151907 | 1.151711795 | 1.386988408 |             |
| YML088W     | YML088W::UFO1::F-box protein                     |             |             | 1           | 0.657930341 |
| 1.01678124  | 0.688509508                                      | 1           | 0.784981837 | 0.875089371 | 0.866337884 |
| 0.88502343  | 1                                                | 0.734479068 | 0.747525312 | 0.69745157  | 0.845189522 |
| 0.692754997 |                                                  | 0.925821909 | 0.944843429 | 1           | 2.193091722 |
| 1.887749222 | 1.830704351                                      | 1           | 0.873200601 | 0.963395334 | 0.910591056 |
| 0.91515714  | 0.979411383                                      | 1           | 1.135160497 | 0.956702207 | 0.768061485 |
| 0.940123025 | 0.838834916                                      | 1           | 1.082427481 | 1.04429565  | 0.958774191 |
| 1.003175177 | 0.849355711                                      | 0.940420177 |             |             |             |
| YHR214CB    | YHR214CB                                         | 1           | 1.213695036 | 1.135066302 | 1.849242759 |
| 1.529128202 | 1.341621977                                      | 1.121551772 | 1.041227499 | 1           | 1.616939919 |
| 1.691164653 | 0.757922044                                      | 1.458862664 | 1           | 1.249854863 | 1.555604002 |
| 1.063694931 | 0.872496272                                      | 1           | 0.332346643 | 0.346541553 | 0.278733416 |
| 0.572743908 | 1                                                | 1.043990499 | 0.894387703 | 1.285046549 | 1.225754176 |

0.883703396 1 1.258391988 1.276284303 2.228037471 3.50778895  
 1.669664552 1 1.272415149 1.785742017 1.425678821 1.039763727  
 YML090W YML090W::YML090W::molecular\_function unknown 1 1.242186044  
 1.73891094 1.586449597 1 2.248108273 1.938262658 1.576516498 1  
 1.642616519 1.515536745 0.86362004 1.550388287 1  
 0.46104577 0.695007702 0.391368256 1 0.802176175  
 0.797638637 0.941242254 1 0.698325638 0.505596613  
 1 0.565711709 0.533077513 1.124573453 0.623453664 1.639717064  
 0.888758347  
 YHR214WA YHR214WA::YHR214W-A::molecular\_function unknown 1 1.175216049  
 0.998857188 1.468280177 0.912749751 1 1.257772112 1.187409415  
 0.885249728 1.295883537 1 1.458398039 1.095627633 1.312592387  
 1.210795131 1.130819971 0.953451471 1.552532314 0.79217219 1  
 0.565197152 0.799872196 0.761763968 0.342852402 1 1.275776046  
 0.924813283 0.985744241 0.722938608 1 1.19108189 1.810886656  
 1.95407636 1.053144299 0.450883864 1 1.656366224 2.342008109  
 1.580056759 1.066397837 1.414548433 0.959683866  
 YML092C YML092C::PRE8::proteasome component Y7 1 1.098769952  
 1.234726101 1.156956449 0.971752142 1 1.09391018 1.125630766  
 1.415247226 1.355641616 1 1.13257964 1.572261171 1.677735248  
 1.142619731 1 1.335934056 1.321938635 1.549298997 1.33666688 1  
 1.739180303 1.295344064 1.408086338 1.606068492 1 1.068479113  
 1.631217039 1.719338308 0.958262538 0.889981202 1 1.140923282  
 1.371428907 1.367985181 0.840786991 0.671962004 1 1.263668733  
 1.236302482 1.130155741 0.63429584 0.932935285 1.20660989  
 YML048WA YML048WA::YML048W-A::molecular\_function unknown 1 1.462685988  
 1.64963536 1.099560068 1 1.19977575 1.076796049 1.317009567  
 1.415557535 1 0.999258477 1.078599687 1.582947522 0.950849054 1  
 0.828826558 0.474349222 0.345345069 0.6527456 1 1.131231974  
 1.089155635 0.671529615 0.613824518 1 0.765022972 0.674245411  
 0.641696175 0.93642085 1 0.41632357 0.706539343 0.612477755  
 0.471466169 1 1.385563538 1.988125406 1.425741747  
 1.710208304 2.739827451  
 YML095C YML095C::RAD10::endonuclease (with Rad1p) that degrades single-  
 stranded DNA for repair 0.971485412 0.899666244 1.046584644 1.267764813  
 1.006114932 0.840262214 1.014934644 1.128752703 0.782455155  
 0.757325394 0.758399321 0.971157072 1 0.739392555  
 1.177439853 1 0.851462167 1.349699076 0.791354222 0.978963877 1  
 0.924704012 0.983275909 0.752473326 0.795698375 1.02405401 1  
 1.086518251 1.003058004 0.949665156 0.741679521 0.962063003 1  
 1.067449482 1.184887254 1.50246324 1.052717387 10.36738829  
 YML109W YML109W::ZDS2::multicopy suppressor of a sin4 defect 1  
 0.688868835 1.171381749 1 0.97599069 1.161060271  
 1.064675289 0.961533475 1 0.686949048 0.580853461 0.545317332  
 1.243507757 1 0.405282552 0.965977713 1.331394103 0.478812526 1  
 0.513189928 0.310299897 0.464953348 1 0.895637651 0.854219589  
 0.975625043 0.893131078 1.072491174 1 1.014143487 0.903745134  
 0.956475521 1.459309765 1 0.798533269 0.8134361 0.943288345  
 0.849544523 0.704420671 0.849355305  
 YML111W YML111W::BUL2::a homologue of BUL1 1 1.220946215 1.016632799  
 1.335885922 1.210163419 1 1.533869009 1.351905647 1.227088573  
 1.101121955 1 1.181005914 1.239659486 1.029134151 0.996933386 1  
 0.937119785 1.014864456 1.015190235 1  
 1.020130967 1 0.959134963 1.003866691 1.044530357 1.000259897  
 1.162858948 1 1.024518981 0.99123134 0.992617507 1.059408297  
 0.9498841 1 0.857296103 0.909387296 0.923977272 0.919785632  
 0.952746204 1.50432208



YPR026W "YPR026W::ATH1::Null mutant is viable; increased tolerance to dehydration, freezing, and toxic levels of ethanol <br> hydrolyzes trehalose" 1  
1.326008677 1.350007331 1.192788908 1 1.288493655  
1.09566259 0.983737633 1 1.584884918 1.791445481 0.542551497  
1.968746982 1.34302315 1.147832615 1.711766404  
1 1.066716926 1.106078017 1.343652731 0.955939259  
1.003740593 1 1.050562174 1.012709481 1.57332066 0.973325907  
1.0141789 1 1.227516398 1.066969104 1.193371575 0.879215049  
1.339030087 0.79331536

YML113W "YML113W::DAT1::datin, an oligo(dA).oligo(dT)-binding protein" 1  
0.980380593 1.141839052 0.973298235 1.048264681 1 1.00710222  
1.150440795 1.263821751 1.217113863 1 0.833676073 0.81206368  
1.366547497 0.89099341 1 0.801356268 0.583191803 0.703324676  
0.868627769 1 1.018087088 1.369066602 1.307747332 1.66421321 1  
0.635092365 0.524098852 0.381139135 0.708931622 0.855687793 1  
0.540625598 0.508575111 0.254953387 0.534845436 1.528851427 1  
0.583406434 0.427158494 0.742418056 1.440168741 1.531239296 1.154948061

YPR028W YPR028W::YOP1::Ypt Interacting Protein 1 1.478555738  
1.19904519 1.01832773 1.254767664 1 0.913739944 0.988903015  
1.37820768 1.323168787 1 1.065955411 1.084316237 1.612576847  
1.094125486 1 0.968159805 0.869298927 0.987864736 1.219858224 1  
1.431055665 1.501524977 2.535115592 1.544903263 1 1.157527268  
1.033329621 1.454380577 1.307042133 0.927783332 1 1.00704124  
1.067206076 0.770573379 0.596349762 0.713463273 1 0.996085716  
0.893494966 0.991421178 0.875450857 1.20238959 1.263525396

YML115C YML115C::VAN1::vanadate resistance protein 1 0.765520018  
0.726380529 0.813042448 0.778885359 1 0.811266252 0.780972326  
0.749044621 0.811094241 1 0.658099553 0.679622427 0.644143553  
0.770356434 1 0.9204201 0.711922216 0.757426594 0.925384711 1  
1.006629978 0.816650271 1.020781835 0.836911018 1 0.939150091  
1.13976372 1.141672834 1.206414246 0.909141352 1 0.847931056  
0.740565681 0.763309056 0.774948249 0.480478977 1 0.983196878  
0.883604579 0.946230369 0.875540679 0.865735125 0.862489653

YPR042C YPR042C::PUF2::mRNA binding protein 1 1.450531377 1.324051186  
1.413983652 1.085990997 1 1.06040674 1.29396116 0.991209924 1  
1.474605612 1.197165768 0.920993037 1.260053732 1 1.020564273  
0.894896266 1 0.790888776 1 0.853552538  
0.786994014 1.130705041 0.881493201 0.996313851 1 1.15872931  
1.388268732 1.238921906 1.040443124 1.424459482 1 0.959931681  
1.299769994 0.981304677 1.393525624 1.35771154 3.529640464

YML117W YML117W::YML117W::molecular\_function unknown 1 0.745609876  
0.86068228 1.054136812 0.663282033 1 1.098793208 1.140343628  
0.766064218 0.640756899 1 1.023424768 1.176739954 0.499180136  
0.894606505 1 1.84690946 1.146849134 1.532862333 0.73031542 1  
1.339345809 1.042556109 1.066034446 1.085402573 1.102458149  
1.163386918 1.383136252 1.119835997 1.019068735 1 1.380800809  
0.889594942 1.085393384 0.914989306 0.581966614 1 1.033254821  
1.014135998 1.022773437 0.878103578 0.958637205 0.708379829

YPR044C YPR044C::YPR044C::molecular\_function unknown 0.959172554  
0.837031246 0.937852306 0.809977068 0.731522421  
0.952810986 0.894578924 0.78271059 0.84954748 0.90458586 1  
1.829974669 1.472329448 1.283842093 1 0.860029135 0.888609847  
1 0.792491692 0.997637082 0.995823297 1  
0.877057744 1.473230997 0.983628858 0.809309104 1.34214598 1  
1.08034988 1.128580758 1.665133332 0.891224442 2.805884018 1.089276219

YPR046W YPR046W::MCM16::Involved in a nonessential role that governs the kinetochore-microtubule mediated process of chromosome segregation

|             |                                                                                                                                                                                                                                                               |             |             |             |             |             |             |             |             |             |   |
|-------------|---------------------------------------------------------------------------------------------------------------------------------------------------------------------------------------------------------------------------------------------------------------|-------------|-------------|-------------|-------------|-------------|-------------|-------------|-------------|-------------|---|
| 1.080738283 | 0.814010271                                                                                                                                                                                                                                                   | 1.142456877 | 0.753072791 | 0.916050579 |             |             |             |             |             |             |   |
| 1.165982394 | 1.11512337                                                                                                                                                                                                                                                    | 0.968122464 | 0.943483585 | 1.02108551  | 1           |             |             |             |             |             |   |
| 0.608413309 | 0.671096879                                                                                                                                                                                                                                                   | 1.131674787 | 1           | 1.853474059 |             |             |             |             |             |             |   |
| 2.81870199  | 1.339651312                                                                                                                                                                                                                                                   | 1           | 1.200963729 | 1.214025438 | 0.711416756 |             |             |             |             |             |   |
| 0.788738746 | 1.100894578                                                                                                                                                                                                                                                   | 0.917256648 | 1.117229847 | 0.958769875 |             |             |             |             |             |             |   |
| 1.102908551 | 1.161163673                                                                                                                                                                                                                                                   | 1           | 1.767483767 | 1.616560054 | 1.470585059 |             |             |             |             |             |   |
| 1.333702537 | 2.118880119                                                                                                                                                                                                                                                   |             |             |             |             |             |             |             |             |             |   |
| YPR048W     | YPR048W::TAH18::Product of gene unknown                                                                                                                                                                                                                       |             |             |             | 1           | 0.602478817 |             |             |             |             |   |
| 0.521467052 | 0.604007056                                                                                                                                                                                                                                                   | 0.511607985 | 1           | 0.555915785 | 0.533307807 |             |             |             |             |             |   |
| 0.687439363 | 0.674752571                                                                                                                                                                                                                                                   | 1           | 1.343425022 | 0.934113933 | 0.45581633  |             |             |             |             |             |   |
| 0.841218777 | 1                                                                                                                                                                                                                                                             | 0.941451907 | 0.541437547 | 0.947729957 | 1           |             |             |             |             |             |   |
| 1.832690253 | 1.47655615                                                                                                                                                                                                                                                    | 0.883752111 | 0.993666044 | 1           | 1.525640654 |             |             |             |             |             |   |
| 1.461972624 | 1.338727734                                                                                                                                                                                                                                                   | 0.958683564 | 0.855016033 | 1           | 1.692163127 |             |             |             |             |             |   |
| 1.741150557 | 1.750696471                                                                                                                                                                                                                                                   | 1.578294413 | 1.01577457  | 1           | 1.621137106 |             |             |             |             |             |   |
| 2.026380145 | 1.385023929                                                                                                                                                                                                                                                   | 1.213384944 | 0.681164006 | 1.098908116 |             |             |             |             |             |             |   |
| YPR050C     | YPR050C::YPR050C::molecular_function unknown                                                                                                                                                                                                                  |             |             |             |             | 0.95547874  |             |             |             |             |   |
| 0.989632862 | 0.856499806                                                                                                                                                                                                                                                   | 1.057286562 | 0.812398493 | 0.767769019 |             |             |             |             |             |             |   |
| 1.091581884 | 0.866849386                                                                                                                                                                                                                                                   | 0.876847389 | 1.12883478  | 0.948640323 | 1           |             |             |             |             |             |   |
| 0.855423051 | 0.552361469                                                                                                                                                                                                                                                   | 0.517583298 | 0.9848853   | 0.627320847 |             |             |             |             |             |             |   |
| 1.054041546 | 0.512040099                                                                                                                                                                                                                                                   | 1           | 0.832114584 | 0.855500805 | 1.015561328 |             |             |             |             |             |   |
| 1.038255892 | 1.257942002                                                                                                                                                                                                                                                   | 1           | 0.806358392 | 0.737090444 | 0.877081188 |             |             |             |             |             |   |
| 1.324253145 | 1                                                                                                                                                                                                                                                             | 0.843119495 | 0.668486389 | 1.017441094 | 1.110885679 |             |             |             |             |             |   |
| 1.211316403 | 1.161077402                                                                                                                                                                                                                                                   |             |             |             |             |             |             |             |             |             |   |
| YPR052C     | "YPR052C::NHP6A::Homologous to mammalian high mobility group proteins 1 and 2; functions redundantly with the highly homologous gene, NHP6A; high-mobility group non-histone chromatin protein"                                                               |             |             |             |             | 1           | 1.737265429 |             |             |             |   |
| 1.603622269 | 1.002388044                                                                                                                                                                                                                                                   | 2.081446068 | 1           | 1.10057736  | 1.039799442 |             |             |             |             |             |   |
| 1.647785104 | 1.687723776                                                                                                                                                                                                                                                   | 1           | 1.050560747 | 1.22250431  | 1.860568743 |             |             |             |             |             |   |
| 1.096023154 | 1                                                                                                                                                                                                                                                             | 0.722656888 | 0.677797964 | 0.707931593 | 0.863705817 | 1           |             |             |             |             |   |
| 1.596659482 | 1.875955173                                                                                                                                                                                                                                                   | 1.611345433 | 0.945746894 | 1           | 1.223548307 |             |             |             |             |             |   |
| 1.030250985 | 1.275173256                                                                                                                                                                                                                                                   | 1.071896849 | 1           | 1.121636723 | 1.348302346 |             |             |             |             |             |   |
| 1.284660755 | 0.920734305                                                                                                                                                                                                                                                   | 1.543896423 | 1           | 0.888999296 | 1.014289064 |             |             |             |             |             |   |
| 0.881334038 | 1.097152733                                                                                                                                                                                                                                                   | 1.047336325 | 1.790651147 |             |             |             |             |             |             |             |   |
| YPR066W     | YPR066W::UBA3::Required for activation of RUB1 (ubiquitin-like protein) together with ULA1. Related to UBA2 and to N-terminus of UBA1. Collaborates with UBC12 in conjugation of RUB1 to other proteins. Required for modification of CDC53/cullin with RUB1. |             |             |             |             | 1.06875708  | 1.027213847 |             |             |             |   |
| 1.161753732 | 0.81352321                                                                                                                                                                                                                                                    | 1.063019209 | 1.103873905 | 0.96024512  |             |             |             |             |             |             |   |
| 1.306905078 | 1.122237726                                                                                                                                                                                                                                                   | 1.118317682 | 1.111152506 | 1           | 1.00134693  |             |             |             |             |             |   |
| 0.740622193 | 0.883714712                                                                                                                                                                                                                                                   | 0.578591009 | 0.636266617 | 0.504001482 |             |             |             |             |             |             |   |
| 0.41745946  | 1                                                                                                                                                                                                                                                             | 1.099806978 | 1.275227505 | 1.262654581 | 1.210525715 |             |             |             |             |             |   |
| 1.248045631 | 1                                                                                                                                                                                                                                                             | 0.978067223 | 0.978215864 | 1.302271086 | 1.086939319 |             |             |             |             |             |   |
| 0.935456433 | 1                                                                                                                                                                                                                                                             | 1.376088621 | 1.122741409 | 1.317192819 | 1.37078357  |             |             |             |             |             |   |
| YPR068C     | "YPR068C::HOS1::Protein with similarity to Hda1p, Rpd3p, Hos2p, and Hos3p"                                                                                                                                                                                    |             |             |             |             | 1           | 0.914393061 | 0.964302794 | 1.025881599 | 1.324203447 | 1 |
| 0.978809714 | 0.994800892                                                                                                                                                                                                                                                   | 1.15747806  | 1           | 1.032721178 | 1.051481955 |             |             |             |             |             |   |
| 1.150198505 | 1.309805344                                                                                                                                                                                                                                                   | 1           | 0.583580124 | 0.570344364 | 0.730835678 |             |             |             |             |             |   |
| 1.06263992  | 1                                                                                                                                                                                                                                                             | 1.22480617  | 3.228251554 | 2.579749909 | 1.70978548  | 1           |             |             |             |             |   |
| 1.249210418 | 0.780970306                                                                                                                                                                                                                                                   | 0.999087609 | 1           | 1.396581876 |             |             |             |             |             |             |   |
| 1.857848902 | 1.997903961                                                                                                                                                                                                                                                   | 1           | 1.431283729 | 1.44041472  | 1.415896645 |             |             |             |             |             |   |
| 0.634246093 | 1.450473164                                                                                                                                                                                                                                                   | 1.473675164 |             |             |             |             |             |             |             |             |   |
| YGL080W     | YGL080W::YGL080W::molecular_function unknown                                                                                                                                                                                                                  |             |             |             | 1           | 1.134427734 |             |             |             |             |   |
| 1.342734445 | 0.970324786                                                                                                                                                                                                                                                   | 1.560144108 | 1           | 1.059711708 | 0.998302352 |             |             |             |             |             |   |
| 1.352723352 | 1.150813793                                                                                                                                                                                                                                                   | 1           | 1.179840054 | 1.19180133  | 1.489837972 |             |             |             |             |             |   |
| 1.032397727 | 1                                                                                                                                                                                                                                                             | 1.703557169 | 1.152285304 | 1.339775759 | 1.361823394 | 1           |             |             |             |             |   |
| 1.759815827 | 1.306867802                                                                                                                                                                                                                                                   | 1.840715196 | 1.426752352 | 1.29418991  |             |             |             |             |             |             |   |
| 1.370477055 | 0.869890687                                                                                                                                                                                                                                                   | 0.940468378 | 1.114755843 | 1           | 0.84829442  |             |             |             |             |             |   |

1.166860441 0.994771423 0.868602463 1.386976529 1 1.153952179  
1.287836275 1.053904665 1.828231773 1.638163726 1.373854061  
YGL082W YGL082W::YGL082W::molecular\_function unknown 1 0.937923624  
1.105043831 1.066639752 1.167915872 1 1.183334352 1.14046499  
1.225127115 1.023680349 1 0.987612966 1.176333695 1.121584479  
1.102544307 1 1.324759009 1.020185385 0.847749764 0.858620718 1  
1.863034266 1.090565006 1.35827622 1.168107183 1 1.09627233  
1.328224508 1.137864903 0.989543399 1.174471902 1 1.138916489  
1.088004283 1.054120572 0.94264946 0.855928046 1 1.303973128  
1.208555443 1.208131326 1.188184657 1.402200058 1.14969428  
YGL084C YGL084C::GUP1::Involved in active glycerol uptake  
1.06875708 0.88144512 1.005213242 0.920230858 1.061808425  
1.100578736 0.928810947 0.820235213 1.527535696 1.256567758  
0.869413125 0.989757915 1 1.657545074 1.067111534 1.304915528  
0.781283533 1 1.593184206 1.272019388 0.966958097 1.202470989 1  
1.44078259 1.552339652 2.009013336 1.245783691 1.080277647 1  
1.170473893 0.988733071 1.294340365 0.78677805 0.351406054 1  
1.408830555 1.100722077 1.028634614 0.764792583 0.935906894 0.810827823  
YGL086W YGL086W::MAD1::coiled-coil protein involved in spindle-assembly  
checkpoint 1 1.140627522 1.123029406 1.316449868 1 1.073824591  
1.16882242 1.101884893 1 0.956898101 1.03167403 0.89116228  
1.178392942 1 0.899513538 0.386612313 0.462503727 0.73798682 1  
1.617213899 1.352678359 1.082753862 0.772378282 1 0.961410135  
1.051631473 1.061984196 1.041034122 1.12624564 1 0.960153921  
1.16347078 0.86691239 0.975427384 0.914189034 1 0.928821335  
1.025247639 1.084343643 1.128798045 1.016403614 1.051624402  
YGL088W YGL088W::YGL088W::molecular\_function unknown 1 1.843397817  
2.166248416 2.233494758 2.344253974 1 1.714211423 2.52299477  
2.061640145 1 1.417179636 2.184194112 2.515190877 1  
1.192088894 1.327042241 0.621423824 1 0.883019118 0.80322617  
1 0.766218875 1.168020526 0.917657588 0.839644598 1.294253783 1  
1.231640173 1.151434803 1.224914991 2.474939527 1.202326811 1  
0.61744025 0.620480383 0.487594566 0.616669888 0.5135872 1.000838238  
YGL090W YGL090W::LIF1::Ligase Interacting Factor 1; physically interacts  
with DNA ligase 4 protein (Lig4p) 1 1.515495365 1.162722892 1.036115766  
1 1.123610701 0.972944209 1.149407196 0.978874809 1 1.716523752  
1.995989135 2.772917929 1.129134289 1 1.201443236 0.998525437  
0.65694651 0.568113502 1 1.094861958  
0.74374452 0.984382942 0.890201163 0.74741774 1 0.957283271  
1.247235663 0.923248121 1.185635277 1.200020339 1 1.183055946  
1.177042742 1.225055345 1.297581941 1.026805241 2.215328695  
YGL104C YGL104C::VPS73 1 1.090385006 1.208344268 1.260479693  
0.82370762 1 1.197406865 1.378614276 1.073266834 0.915805214 1  
1.326876032 1.627507736 1.857825608 1.046721727 1 2.650758058  
3.067402685 3.202531904 1 2.522633492 1.69721562 1.598304518  
1.510975645 1 1.010933591 1.677341015 1.836213899 1.071442673  
1.120255995 1 1.11545916 1.343568615 1.869362768 1.625593283  
1.157927722 1 1.23698477 1.420672914 1.363366828 1.025207905  
1.687999966 0.887882787  
YGL106W YGL106W::MLC1::may stabilize Myo2p by binding to the neck region 1  
0.762880295 1.008762372 0.830908231 0.867168494 1 0.775649534  
0.768888916 1.082308724 1.156852152 1 0.758530333 0.93084597  
1.044065429 0.919686126 1 0.991682356 0.748858202 0.841326454  
1.042947518 1 1.529731552 1.264231635 1.362181118 1.295561466 1  
1.187772003 1.350334929 1.41087457 1.106607675 1.196417289 1  
0.900741394 1.500141734 1.040896842 0.909451582 1.153252271 1  
1.035473708 1.158786509 1.218193399 1.442474205 1.151913131 1.457038366

|         |                                                                     |             |             |             |             |             |             |
|---------|---------------------------------------------------------------------|-------------|-------------|-------------|-------------|-------------|-------------|
| YGL108C | YGL108C::YGL108C::molecular_function                                | unknown     | 1           |             |             |             |             |
|         | 1.739887772                                                         | 1.114926701 | 1.559926711 | 1           | 0.999271912 | 1.073744712 |             |
|         | 1.687538771                                                         | 1.501930126 | 1           | 1.325070841 | 1.548033505 | 1.782072981 |             |
|         | 1.616013192                                                         |             | 0.905586659 | 0.862412229 | 0.886546545 | 0.986089393 | 1           |
|         | 1.673573741                                                         | 2.182177015 | 2.73182993  | 1.666201757 | 1           | 1.117476973 |             |
|         | 1.313992126                                                         | 1.018218802 | 0.730733288 | 1.10262196  | 1           | 1.397936366 |             |
|         | 1.793249676                                                         |             | 1.846554999 | 1.969955895 | 1           | 1.061558527 | 1.271516538 |
|         | 1.012035593                                                         | 0.957820407 | 1.314219672 | 1.223246689 |             |             |             |
| YGL110C | YGL110C::CUE3::Hypothetical ORF                                     |             |             |             | 0.897608189 | 0.970272934 |             |
|         | 1.085719784                                                         | 1.027917403 |             | 1.025486619 | 0.922640851 | 1.049384154 |             |
|         | 0.92803049                                                          |             | 0.81139031  | 1.065120987 | 0.675431159 | 1.080803829 | 1           |
|         | 1.625982123                                                         |             | 0.873285497 | 0.930484205 | 1           | 1.361865929 |             |
|         | 1.237313302                                                         | 1           | 0.993815998 | 1.021623473 | 0.853673773 | 0.75655147  |             |
|         | 0.997601456                                                         | 1           | 1.070052184 | 1.080924565 | 0.939155101 | 1.062870757 |             |
|         | 1.089560509                                                         | 1           | 0.969015215 | 1.095697923 | 0.967887281 | 0.959246055 |             |
|         | 0.978936285                                                         | 1.309057884 |             |             |             |             |             |
| YML119W | YML119W::YML119W::molecular_function                                | unknown     | 1           |             |             | 0.662069265 |             |
|         | 0.881857605                                                         | 0.859304716 | 0.908709523 | 1           | 0.813008849 | 0.868915791 |             |
|         | 0.987430369                                                         | 1           | 0.671463109 | 0.727067064 | 0.756357915 | 0.674587329 | 1           |
|         | 0.97293114                                                          | 0.616748942 | 0.890264975 | 0.834402455 | 1           | 1.440130612 |             |
|         | 1.699776217                                                         | 1.668258579 | 0.739833262 | 1           | 0.960844603 | 0.974378304 |             |
|         | 0.751230483                                                         | 0.883363485 | 0.964332832 | 1           | 0.856819147 | 0.66621217  |             |
|         | 0.545214445                                                         | 1.032592703 | 2.115421979 | 1           | 0.922811617 | 0.755491172 |             |
|         | 0.985646089                                                         | 1.20646257  | 1.544936666 | 1.052500067 |             |             |             |
| YMR002W | YMR002W::YMR002W::molecular_function                                | unknown     | 1           |             |             | 1.434066744 |             |
|         | 1.539748931                                                         | 1.381067078 | 2.187941196 | 1           | 1.232268706 | 1.378059336 |             |
|         | 1.69214651                                                          | 1.567515714 | 1           | 1.019255174 | 1.522052925 | 1.662296556 |             |
|         | 1.009613877                                                         | 1           | 0.837535877 | 0.914730988 | 0.987875839 | 1.759188718 | 1           |
|         | 1.737556511                                                         | 1.07870652  |             | 1.343901471 | 1           | 0.968622787 | 1.029203987 |
|         | 0.917139987                                                         | 0.683497585 | 0.620724987 | 1           | 1.026846583 | 1.341540485 |             |
|         | 0.715202701                                                         | 0.585350131 | 1.202704318 | 1           | 0.885212674 | 1.239018098 |             |
|         | 0.984744206                                                         | 1.338779767 | 1.467124162 | 1.361595274 |             |             |             |
| YMR004W | YMR004W::MVP1::Protein required for sorting proteins to the vacuole |             |             |             |             |             |             |
|         | 1                                                                   | 0.851852669 | 1.067449006 | 1.109323452 | 1.150001291 | 1           | 1.096778377 |
|         | 1.358244446                                                         | 1.048394517 | 1.018090234 | 1           | 0.993096874 | 1.193150146 |             |
|         | 0.886697922                                                         | 1.035816786 | 1           | 1.37163407  | 0.879287789 | 1.176896689 | 1           |
|         | 1.543399268                                                         | 1.34318978  | 1.131890684 | 0.949160133 | 1           | 1.001078337 |             |
|         | 1.196676588                                                         | 1.096536347 | 0.900109557 | 1.113081579 | 1           | 1.272922336 |             |
|         | 1.022798608                                                         | 1.188802148 | 0.862967453 | 1           | 1.229281727 | 1.112229299 |             |
|         | 0.999412233                                                         | 1.150440366 | 1.063745403 |             |             |             |             |
| YMR007W | YMR007W::YMR007W::molecular_function                                | unknown     | 1           |             |             | 1.49150248  |             |
|         | 1.634645412                                                         | 1.250575533 | 1.414116351 | 1           | 1.561431271 | 1.05640477  |             |
|         | 1.638785589                                                         | 1.277438102 | 1           | 2.086322264 | 2.631862693 | 4.029460361 |             |
|         | 1.97053033                                                          | 1           | 0.678185495 |             | 0.972717384 | 0.366712602 |             |
|         | 1.052244062                                                         |             | 1           | 0.907253604 | 1.132922875 | 1.128462448 |             |
|         | 0.996363889                                                         | 0.939707434 | 1           | 0.837255992 | 1.35381288  | 1.305864035 |             |
|         | 1.175242712                                                         | 2.16562034  | 1           | 0.63084926  | 1.495884739 | 1.408950135 |             |
|         | 1.201325235                                                         | 1.463886336 | 1.204858665 |             |             |             |             |
| YMR009W | YMR009W::YMR009W::molecular_function                                | unknown     | 1           |             |             | 0.972724865 |             |
|         | 1.116756361                                                         | 0.824073294 | 1.173559991 | 1           | 0.869968376 | 1.119677331 |             |
|         | 1                                                                   | 0.889779413 | 1.413517556 | 1.338901332 | 1.153625075 | 0.813445796 |             |
|         | 0.57345789                                                          | 0.785295701 |             | 0.679873518 | 0.987387395 | 0.419633732 | 1           |
|         | 0.965292104                                                         | 1.097681287 | 0.701636202 | 0.748787941 | 0.811816334 | 1           |             |
|         | 1.07181978                                                          | 1.515214291 | 0.915858652 | 1.395542745 | 2.345776875 | 1           |             |
|         | 1.099540478                                                         | 1.189044308 | 1.083856766 | 1.201307693 | 1.498471702 | 1.825676073 |             |
| YMR011W | YMR011W::HXT2::hexose transporter                                   |             |             |             |             |             |             |
|         | 1                                                                   |             |             |             | 1.5895338   | 0.784390082 |             |
|         | 1.133261674                                                         | 0.629546616 | 1           | 1.445525863 | 0.972315173 | 0.537581627 |             |

|             |                                                                                           |             |             |             |             |             |
|-------------|-------------------------------------------------------------------------------------------|-------------|-------------|-------------|-------------|-------------|
| 0.587154656 | 1                                                                                         | 1.880264632 | 0.511412547 | 1.599452565 | 0.902734908 | 1           |
| 3.415634715 | 0.223075416                                                                               | 1.252599804 | 0.917601104 | 1           | 3.106798125 |             |
| 0.661302932 |                                                                                           | 1.219930558 | 1           | 1.612227121 | 0.585449463 | 1.179039959 |
| 0.953624757 | 0.592546185                                                                               | 1           | 1.200683961 | 0.34198979  | 0.832159245 |             |
| 0.364759077 | 0.31515789                                                                                | 1           | 1.905086074 | 0.51378     | 0.768905151 |             |
| 0.88015041  | 0.572021719                                                                               | 0.290707157 |             |             |             |             |
| YMR013C     | YMR013C::SEC59::membrane protein required for core glycosylation                          |             |             |             |             | 1           |
| 0.913349943 | 0.740715936                                                                               |             | 0.630071636 | 1           | 0.766851555 | 0.727894883 |
| 0.630541603 | 0.603997914                                                                               | 1           | 0.889387511 | 0.700946293 | 0.59434835  |             |
| 0.70150298  | 1                                                                                         | 0.552642053 | 0.602052911 | 0.687695208 | 1.157512972 | 1           |
| 0.906848171 | 1.412027916                                                                               | 1.430528929 | 0.940440289 | 1           | 1.099806985 |             |
| 0.903567508 | 1.218458386                                                                               | 1.00974057  | 1.11085259  | 1           |             | 0.747869741 |
| 0.60131597  | 0.48766713                                                                                | 1           | 0.84428239  | 0.878942403 | 0.842367564 |             |
| 0.659402586 | 0.950052073                                                                               |             |             |             |             |             |
| YPR070W     | YPR070W::MED1::Subunit 1 of the Mediator complex essential for transcriptional regulation |             |             |             |             | 1           |
| 0.61341213  | 0.627607341                                                                               | 0.566355307 |             | 1           | 0.597188879 | 0.599717554 |
| 0.319531178 | 0.772311089                                                                               | 1           | 0.547503549 | 0.41794454  | 0.505539334 |             |
| 0.803977751 | 1                                                                                         | 1.171168269 | 1.029981131 | 1.522216166 | 1.524512422 | 1           |
| 0.950874694 | 0.989525006                                                                               | 0.903648328 | 0.789320765 | 1.183381515 | 1           |             |
| 1.136248443 | 1.131776246                                                                               | 1.054288504 | 1.128919887 | 1.019333199 | 1           |             |
| 0.85999054  | 0.793964317                                                                               | 0.947938021 | 0.395412607 | 0.816803992 | 1.118171805 |             |
| YMR027W     | YMR027W::HRT2::High level expression reduced Ty3 Transposition                            |             |             |             |             | 1           |
| 0.954886045 | 0.971153701                                                                               | 1.022187816 | 1.073364068 | 1           | 0.937743013 |             |
| 0.970395482 | 1.110222919                                                                               | 1.261548722 | 1           | 0.99708395  | 1.138752985 |             |
| 1.471056322 | 1.009390098                                                                               | 1           | 1.168417698 |             | 1.021283406 | 1.28109033  |
| 2.287494423 | 2.187122111                                                                               | 2.553278544 | 1.663396605 | 1           | 1.112941827 |             |
| 1.371244866 | 1.586614226                                                                               | 0.994461818 | 1.119523777 | 1           | 1.243047205 |             |
| 1.541142116 | 2.067340161                                                                               | 1.306490086 | 0.912160438 | 1           | 1.308861852 |             |
| 1.448921412 | 1.137785794                                                                               | 0.817210014 | 1.254086167 | 1.020977592 |             |             |
| YPR072W     | "YPR072W::NOT5::member of the NOT complex, a global negative regulator of transcription"  |             |             |             |             | 1           |
| 0.894585397 | 1                                                                                         | 0.749382191 | 0.783168071 | 0.756208485 | 0.793342031 | 1           |
| 0.740509808 | 0.868720501                                                                               | 0.699268824 | 0.901568537 | 1           | 0.830878451 |             |
| 0.68643155  | 0.632176963                                                                               | 0.849776839 | 1           | 1.376120387 | 1.396974069 |             |
| 1.525853895 | 1.105815517                                                                               | 1           | 1.029438991 | 1.13262207  | 0.818980069 |             |
| 0.713190295 | 1.113139873                                                                               | 1           | 1.506111974 | 1.547728108 | 1.130798853 |             |
| 1.184181641 | 1.354457947                                                                               | 1           | 1.042507722 | 1.249753014 | 1.015796068 |             |
| 1.047678947 | 1.034427841                                                                               | 1.134808707 |             |             |             |             |
| YMR029C     | YMR029C::YMR029C::molecular_function unknown                                              |             |             |             |             | 1           |
| 0.698154725 |                                                                                           | 0.762364073 | 1           | 0.7670761   | 0.850156249 | 0.821690395 |
| 0.750789133 | 1                                                                                         | 0.740066415 | 0.928840186 | 0.811357491 | 0.910684529 | 1           |
| 1.164964391 | 0.895290402                                                                               | 0.936871449 | 1.422906833 | 1           | 2.048323157 |             |
| 1.862275807 | 2.895562973                                                                               | 1.510849364 | 1           | 0.797583597 | 0.804762343 |             |
| 1.297115063 | 0.779880865                                                                               | 1.039566485 | 1           | 1.32458251  | 1.165677392 |             |
| 1.349565848 | 1.118686266                                                                               | 0.728378727 | 1           | 1.043300401 | 1.170124942 |             |
| 1.070214741 | 0.649730035                                                                               | 1.025221371 | 1.199604884 |             |             |             |
| YPR074C     | YPR074C::TKL1::Transketolase                                                              |             |             |             |             | 1           |
| 0.697848385 | 0.346023968                                                                               | 1           | 0.982318886 | 0.911529295 | 0.45522416  |             |
| 0.513740892 | 1                                                                                         | 1.005749293 | 0.762748838 | 0.45997464  | 0.569862259 | 1           |
| 1.013738871 | 1.04234949                                                                                | 1.521578086 | 0.550598727 | 1           | 0.399117128 |             |
| 0.262935891 | 0.308800885                                                                               | 0.539129656 | 1           | 0.958482887 | 0.672201468 |             |
| 1.3428144   | 0.699608016                                                                               | 1           | 0.725499851 | 0.566371278 | 0.706639908 |             |
| 0.655269076 | 0.504856548                                                                               | 1           | 0.640081192 | 0.566835131 | 0.874912525 |             |
| 0.447267827 | 0.638867363                                                                               | 0.663723006 |             |             |             |             |
| YMR031C     | YMR031C::YMR031C::molecular_function unknown                                              |             |             |             |             | 1           |
| 0.985779617 | 1.00660098                                                                                | 0.849106491 | 1           | 1.02601752  | 0.984054731 |             |

0.740039703 1 1.073879794 1.392593031 1.048956525 1.007593092 1  
1.31471489 1.277008262 1.268247561 0.877898417 1 1.610486039  
1.175087428 1.507465062 1.017988737 1 0.952119739 1.188597149  
1.180038376 0.84716028 0.963615726 1 1.036034578 0.780141956  
1.137005162 0.992538271 0.863733527 1 1.444206556 1.048412299  
1.361689047 0.876548101 1.084226927 0.737275415  
YPR076W YPR076W::YPR076W::molecular\_function unknown 1 0.997325434  
0.801351918 0.778838775 1 0.928312217 1.046035263  
0.999128529 1 1.008046681 0.993013472 0.935993689 1.137851073 1  
0.511766701 0.426676527 0.796350185 1 1.533190195  
1.061952002 1 1.043218697 1.234782673 1.319363351 1.258594806 1  
0.894666194 0.724871755 0.994712693 1.235666138 0.34606128 1  
0.948121236 0.94513379 1.291933283 0.841870765 1.037119257  
YPR090W YPR090W::YPR090W::molecular\_function unknown 1 0.911547597  
0.97225799 1.176794515 0.834066483 1 1.083683169 1.069077  
0.890042288 0.907472315 1 1.154384806 1.02298706 0.797302161  
1.118136778 1 0.654794563 0.615792347 0.700170747 0.652105825 1  
1.076263629 0.979301736 1.132170257 1.150371582 1 0.895859555  
0.765077685 0.75163032 0.832678054 1 1.040427194 0.86861804  
1.002658312 0.96147609 0.86061638 1 1.091567012 1.076327589  
1.107298842 0.749604865 1.01656528 0.76354411  
YPR092W YPR092W::YPR092W::molecular\_function unknown  
0.866640472 0.915336017 0.87051341 1.001724385 1.024209543  
0.842537689 1.11279831 1.016466064 0.761905044 0.966262132 1  
0.750406366 0.976551266 0.614852557 1 1.402420103 1.983384398  
1.048439823 1 0.988381675 1.138896259 1.074529569  
1.185368534 1 0.962542282 0.733903615 1.016299881 1.054670795  
0.708276176 1 1.205256162 1.411421912 1.650529292 1.27755434  
1.58556671  
YPR094W YPR094W::RDS3::Protein required for cell viability 1  
0.860217044 1.109077446 0.824434195 1.261825048 1 0.720046432  
0.741867369 1.234720178 1.228583054 1 0.986229849 1.027755985  
1.517828649 1.107095531 1 1.008325365 0.766544881 1.267746272 1  
2.08119129 3.153539783 1.28435323 1 0.859609655 1.09387287  
0.836571516 0.738521377 0.920837207 1 1.100048342 1.433036844  
1.341650092 1.567397305 1.734234976 1 1.034874153 1.5813672  
1.290970706 1.315660843 1.148974206 1.503446415  
YPR096C YPR096C::YPR096C::molecular\_function unknown 1.031818505  
0.805144346 1.142745162 0.908483206 0.956475146 0.89408296  
0.846662218 0.789259592 1.121237769 0.970984188 0.659071236  
1.113110458 1 0.840108267 0.437726777  
1 0.975614322 0.70293292 1.11188014 1.067971444 0.89950269 1  
1.167944751 0.74752825 0.817606147 0.57240874 0.654870038  
1.022648373 0.863106942 0.793487828 0.93722589 0.722327432 0.830967177  
YPR098C YPR098C::YPR098C::molecular\_function unknown 1 1.16728037  
1.19576298 1.455654033 1 0.869963143 0.920352662 1.395840422  
1.302417683 1 1.123397364 1.165769167 2.371384508 1.147074323 1  
1.701966685 2.280059086 2.732374264 1 1.87856181 4.45310417  
1.742186721 1 1.037088597 1.258469054 0.988925558 0.86631678  
0.959230987 1 0.951240249 1.580940161 1.477478726 1.395626434  
2.429241346 1 1.120533992 2.490356603 1.442718439 2.716946568  
2.646610435 1.80378539  
YPR100W YPR100W::YPR100W::molecular\_function unknown 1 0.879730087  
1.837356353 1.253547685 2.283176587 1 1.156904502 1.167587725  
2.053046525 1.819100225 1 1.283346013 1.391626618 2.246809584  
1.364815894 1 1.056113623 0.924239839 0.811899637 1.332366941 1  
1.717260364 2.225683529 2.582878484 1.117022158 1 0.914852642

0.613044083 0.6137495 0.953477734 1 1.109966542 1.428228629  
 1.134874938 1.235067611 2.286190436 1 1.144526761 1.488878106  
 0.918162049 1.475339069 1.767865051 1.302928543  
 YMR034C YMR034C::YMR034C::molecular\_function unknown 1 0.998663304  
 0.887634774 0.905825756 0.828741483 1 0.856628187 1.015125791  
 1.074655141 1.023946125 1 1.461003604 1.177310822 1.087804095  
 0.766909985 0.490873727 0.627253203 0.601005672 1 1.334127929  
 1.387236236 1.204540333 0.901506533 1 1.10448272 1.272646446  
 1.851962659 1.069649874 0.917861537 1 1.399113221 1.713671611  
 1.194226987 0.635790904 1 1.270794255 1.311108698 0.86056668  
 0.629707068  
 YMR036C YMR036C::MIH1::<u>M</u>itotic <u>I</u>nducer <u>H</u>omolog <br> S.  
 pombe cdc25+ homolog 0.912383663 0.827920684 0.993653521  
 0.842666664 0.868820171 0.989760032 0.944137842 0.905429616  
 0.767902554 1.87204273 0.879132124 1 0.460524423 0.932862301  
 0.469473607 0.541235179 1 1.089842925 1.829522662 1  
 0.916353038 0.657096412 1.007397834 0.932361214 1 0.669690331  
 0.553279352 0.684518175 0.81201286 1 0.697907428 0.66315953  
 0.920911771 0.639026081 0.694778482 0.720638564  
 YMR038C "YMR038C::LYS7::Involved in lysine biosynthesis, oxidative stress  
 protection" 1 0.886010048 0.875432486 0.881143803 1 1.11434627  
 0.8258229 1.10547167 1.155201834 1 2.183284133 2.52481992  
 3.419381162 1.130414738 1 1.957198945 0.918454549 1.179857473  
 1.411543348 1 3.383587361 3.037108181 2.066627162 1.952473709 1  
 1.700173611 2.250461054 2.630420829 1.370577338 1.143062228 1  
 1.538454563 2.480917013 3.135558022 2.307510756 1 2.048853043  
 1.864096861 2.197352037 0.803493671 0.764428371 1.55948636  
 YMR054W YMR054W::STV1::Stv1p and Vphlp may be equivalent subunits for  
 vacuolar-type H(+)-ATPases located on different organelles 1 1.397606097  
 1.36090997 1.632824419 1.400868214 1 1.40669668 1.627777368  
 1.383976515 1.159877139 1 2.029664276 1.718598474 0.919546915  
 1.397151094 1 1.372484589 1.121762465 0.974100363 0.584983685 1  
 0.742975153 0.765814043 0.506190439 0.527709033 1 1.263878072  
 1.282400158 1.691814736 1.269765884 0.860641133 1 1.610732961  
 1.074204419 1.292980024 1.328328785 0.660498984 1 1.499744524  
 1.242431238 1.04167221 0.879990741 0.916693569 0.901892695  
 YMR056C "YMR056C::AAC1::minor species of mitochondrial ADP/ATP translocator,  
 highly homologous to PET9 (AAC2) and AAC3" 1 1.532745948 1.543232739  
 1.1466911 1.317931593 1 1.17410628 1.272620716 1.540203316  
 1.773265397 1 1.276146778 0.899686916 1.984986022 1.586017819 1  
 0.962004143 0.673670295 1.007033098 1.783483722 1 1.341761011  
 1.341813557 2.183851176 1 0.932489792 0.916284102  
 1.136113246 0.841834174 1 0.906501304 0.83814664 0.815747781  
 0.894656466 1 0.99757121 0.768303987 0.838117072 0.794370496  
 1.4909212 0.974569543  
 YMR058W YMR058W::FET3::FET3 encodes a ferro-O2-oxidoreductase that is part  
 of the high-affinity iron transport system 1 0.922509315 0.748236966  
 0.709861892 0.932256704 1 0.66014152 0.432956018 0.974578345 1  
 3.679280393 2.624273861 0.514127727 1.033957773 1 2.571211978  
 1.35167415 0.66285787 0.432762814 1 0.858177552 0.360634085  
 0.155468413 0.306908879 1 2.550882051 1.705142557 2.906624376  
 0.990058755 1.172226451 1 3.082679331 2.269710679 1.843912239  
 1.636550469 0.085779974 1 2.611324566 1.42124079 1.281303155  
 0.285357581 0.259328 0.764419775  
 YMR061W YMR061W::RNA14::Protein with a role in mRNA stability and/or poly(A)  
 tail length 1 0.59752204 0.704458472 0.752614452 0.687221647 1  
 0.752916407 0.672953797 0.654164034 1 0.660284339 0.702910718

|             |                                                                                                                                             |             |             |             |             |   |                         |
|-------------|---------------------------------------------------------------------------------------------------------------------------------------------|-------------|-------------|-------------|-------------|---|-------------------------|
| 0.587803522 | 0.702664769                                                                                                                                 | 1           | 0.735195561 | 0.77292023  | 0.842522212 | 1 |                         |
| 1.057597026 | 0.983733302                                                                                                                                 | 1.21229391  | 1.232242627 | 0.940399065 |             |   |                         |
| 0.888186941 | 1.019418877                                                                                                                                 | 1.040332471 | 1.004715554 | 1           | 0.956675709 |   |                         |
| 0.998117227 | 1.052013432                                                                                                                                 | 1.483806937 | 1.092532149 | 1           | 1.277754639 |   |                         |
| 1.355217407 | 1.36864242                                                                                                                                  | 1.170216424 | 1.090483049 | 0.943922628 |             |   |                         |
| YPR114W     | YPR114W::YPR114W::molecular_function unknown                                                                                                |             |             |             |             | 1 | 1.014024057             |
| 0.738928965 | 0.726361441                                                                                                                                 | 0.619662898 | 1           | 0.880811049 | 0.944441252 |   |                         |
| 0.59519167  | 0.726178186                                                                                                                                 | 1           | 1.148805214 | 0.884678922 | 0.814789179 |   |                         |
| 0.668538851 | 0.99400465                                                                                                                                  | 0.323558394 | 0.983378057 | 0.793547553 | 1           |   |                         |
| 0.949256813 | 0.998691911                                                                                                                                 | 0.78654281  | 0.868247628 | 1           | 1.179869484 |   |                         |
| 1.293034316 | 1.433293022                                                                                                                                 | 1.66725005  | 1.187091277 | 1           | 0.773954839 |   |                         |
| 0.597560337 | 0.840724376                                                                                                                                 | 0.672615194 | 0.456393457 | 1           | 1.060480888 |   |                         |
| 1.143531167 | 1.508299894                                                                                                                                 | 1.084266934 | 1.28362844  | 0.941295842 |             |   |                         |
| YMR064W     | YMR064W::AEP1::Required for the translation of OLI1 mRNA.                                                                                   |             |             |             |             | 1 |                         |
| 0.843196429 | 0.974312684                                                                                                                                 | 1.081133621 | 0.888425274 | 1           | 0.981908777 |   |                         |
| 1.146618769 | 1.158172716                                                                                                                                 | 0.948522154 | 1           | 1.065037358 | 0.892167656 |   |                         |
| 0.757955204 | 1.186408102                                                                                                                                 | 1           | 0.854297157 | 0.757795232 | 0.666549546 |   |                         |
| 1.039085679 | 1                                                                                                                                           | 1.192637815 | 1.221539937 | 1.002298368 | 1.034065947 | 1 |                         |
| 0.89355301  | 0.978573821                                                                                                                                 | 0.8715566   | 0.832989045 | 1.021539996 | 1           |   |                         |
| 0.989077328 | 0.770591467                                                                                                                                 | 0.593887855 | 0.980242477 | 1.099868756 | 1           |   |                         |
| 1.240220802 | 1.162816779                                                                                                                                 | 1.407154532 | 1.299918462 | 1.381926511 | 0.873872775 |   |                         |
| YPR116W     | YPR116W::YPR116W::molecular_function unknown                                                                                                |             |             |             |             | 1 |                         |
| 1           |                                                                                                                                             |             | 1           | 1.594285976 |             | 1 |                         |
| 0.41331642  | 0.527236418                                                                                                                                 | 0.534593561 | 1           | 0.613749663 | 1.979464716 |   |                         |
| 1.14762925  | 0.992506912                                                                                                                                 |             |             | 0.88403525  | 1.089779775 |   |                         |
| 0.989405685 |                                                                                                                                             |             | 1.173110412 | 1           |             |   |                         |
|             | 0.74448926                                                                                                                                  |             |             |             |             |   |                         |
| YMR066W     | YMR066W::SOV1::Synthesis Of Var                                                                                                             |             |             |             |             | 1 | 0.714979198 0.945646548 |
| 1.165520042 | 0.910526919                                                                                                                                 | 1           | 0.912989826 | 0.80875827  | 1           |   |                         |
| 0.859696578 | 0.871212022                                                                                                                                 | 0.747099862 | 1.013904681 | 1           | 0.913679903 |   |                         |
| 0.781809164 | 0.834432229                                                                                                                                 | 1.046268646 |             | 0.748088544 | 1.299984511 |   |                         |
| 0.725118373 | 1                                                                                                                                           | 0.856828063 | 0.896681064 | 1.045688477 | 0.855731703 |   |                         |
| 0.938474593 | 1                                                                                                                                           | 1.283923256 | 1.134787216 | 1.299567909 | 2.205361335 | 1 |                         |
| 0.990721157 | 1.253431238                                                                                                                                 | 1.108177028 | 1.14440285  | 1.127803701 |             |   |                         |
| YPR118W     | YPR118W::YPR118W::molecular_function unknown                                                                                                |             |             |             |             | 1 | 0.99223442              |
| 0.709189506 | 0.708581932                                                                                                                                 | 0.718687059 | 1           | 0.732516441 | 0.701618341 |   |                         |
| 0.838536973 | 0.793549144                                                                                                                                 | 1           | 0.896277092 | 0.838082383 | 0.573888964 |   |                         |
| 0.968182152 | 1                                                                                                                                           | 0.76083684  | 0.470684196 | 0.363507808 | 0.644469192 | 1 |                         |
| 1.388015668 | 0.912598281                                                                                                                                 | 0.71486272  | 0.93414024  | 1           | 0.919105766 |   |                         |
| 0.943793973 | 0.866828008                                                                                                                                 | 0.883645007 | 0.801128663 | 1           | 1.280585721 |   |                         |
| 1.518091466 | 1.138616252                                                                                                                                 | 1.003354353 | 1.117633256 | 1           | 0.977715243 |   |                         |
| 1.397700862 | 1.064857281                                                                                                                                 | 1.094923354 | 0.7128451   | 0.999962573 |             |   |                         |
| YMR081C     | "YMR081C::ISF1::May regulate NAM7 function, possibly at level of mRNA turnover"                                                             |             |             |             |             | 1 |                         |
| 1.692370132 |                                                                                                                                             | 1.405136713 | 1.193884098 | 1           |             |   |                         |
| 1.364704969 | 0.963396477                                                                                                                                 | 1.628880473 | 2.356856455 | 1           | 1.186897192 | 1 |                         |
| 2.450541571 | 1.470673575                                                                                                                                 | 1.182412187 | 1           | 1.154797258 | 1.19051933  |   |                         |
| 1.113842895 | 0.965180033                                                                                                                                 | 1.019400187 | 1           | 0.891767164 | 0.960217359 |   |                         |
| 0.984997313 | 0.840699324                                                                                                                                 | 1.015843484 | 1           | 1.255978268 | 1.29664728  |   |                         |
| 0.998287338 | 1.30801065                                                                                                                                  | 1.82106255  | 1.238132366 |             |             |   |                         |
| YPR120C     | YPR120C::CLB5::role in DNA replication during S phase; additional functional role in formation of mitotic spindles along with Clb3 and Clb4 |             |             |             |             | 1 |                         |
| 0.704609692 | 0.825830717                                                                                                                                 | 0.79443334  | 0.852803865 | 1           | 0.698454771 |   |                         |
| 0.668421992 | 0.944456861                                                                                                                                 | 0.869791993 | 1           | 0.566095163 | 0.526866152 |   |                         |
| 0.588399047 | 1.100804739                                                                                                                                 | 1           | 0.368292853 | 0.304533813 | 0.50170496  |   |                         |
| 0.956577736 | 1                                                                                                                                           | 0.749717816 | 1.187048868 | 1.165306891 | 1.061455484 | 1 |                         |
| 0.882504152 | 0.794661293                                                                                                                                 | 0.717957687 | 0.736415117 | 1.099616879 | 1           |   |                         |



0.787101607 0.921020265 0.999356073 1.100092567 1.313241424 1  
 1.077729752 1.419761158 1.403245013 1.080519988  
 YPR122W "YPR122W::AXL1::determinant in axial budding pattern of haploid  
 cells, involved in processing of a-factor" 1 0.940873078 0.800196798  
 1.082262476 0.815135441 1 0.895387804 0.905881722 0.951952172  
 0.775929819 1 1.053635372 0.963386839 0.576822293 1.027538799 1  
 0.853594768 0.637379589 0.972057661 0.853416312 0.926676936  
 0.876683673 0.785997871 1 1.105998188 1.136582798  
 1.037361769 1.041919643 1 0.831938331 0.651767728 0.785207013  
 0.757198722 0.658982262 1 0.782612406 0.812077709 0.860710749  
 0.552722496 0.710122422 0.937793286  
 YPR124W "YPR124W::CTR1::High affinity copper transporter into the cell,  
 probable integral membrane protein" 1 0.853189692 0.794875549 1.010433612  
 1.756123446 1 0.779748266 0.84257639 1.20627845 1.727549142 1  
 0.869967459 1.057471432 1.751456985 3.599796463 1 1.244356605  
 2.514147091 4.674190672 1 2.639622312 2.142332553 1.917744947  
 8.428176443 1 1.980938943 2.05573171 1.789901868 1.159949884  
 1.148894208 1 1.698546968 1.807833677 1.423242304 1.103336169  
 0.546474386 1 1.989032349 2.467479522 1.192124235 0.884424315  
 1.35977343 3.019151512  
 YPR138C YPR138C::MEP3::ammonia permease of high capacity and low affinity;  
 shows sequence similarity to Mep1p and Mep2p 1 0.828473147 0.766255253  
 0.775025928 0.806600124 1 0.830729553 0.777459848 0.787720821  
 0.958472353 1 0.842411573 0.713905702 0.844301632 0.675147699 1  
 0.936141073 1.068502071 1.113899461 0.689340675 1 0.739279005  
 0.523584251 0.519942651 1 0.908337525 0.878539722 1.029625983  
 1.432848596 0.922440035 1 0.5327799 0.536880147 0.577324233  
 0.638434969 0.599644774 1 0.625175374 0.572567366 0.8057702  
 0.603657589 0.795377916 1.356341598  
 YPR140W YPR140W::YPR140W::molecular\_function unknown 1 0.845541691  
 1.002407618 0.919805253 0.852013752 1 0.897893827 1.071602883  
 1.132880523 1.028164309 1 0.898454929 1.102374678 1.559716248  
 0.895205458 1 0.999852427 0.99035769 1.519337143 1  
 1.20764361 1.905844178 2.555716437 0.911973986 1 0.853545782  
 0.975409043 1.11811986 0.851195277 1.024350052 1 0.922519976  
 1.207477347 0.879595055 1.144188457 0.985939726 1 0.873227923  
 1.04987086 0.921173741 1.052078545 0.814635348 0.875624  
 YPR142C YPR142C::YPR142C::molecular\_function unknown 0.770785646  
 1.079010861 1.344124462 0.959985882 1.19380701 1.334431029  
 0.582320268 0.795403157 0.781770689 1.354920721 1 0.158949466  
 0.241582763 0.177551629 0.394099427 1 0.617187039 1.459779733  
 0.816492658 1 0.568966828 0.58417677 0.563924821 0.907361687 1  
 1.102005524 0.973199432 2.468503718 1 0.604558397  
 1.190205811 1.179526162 1.028858158  
 YPR144C "YPR144C::UTP19::U3 protein, localized to the nucleolus" 1  
 0.849457031 0.540331609 0.750712844 0.865578942 1 0.808071083  
 0.685909507 0.721469781 0.89082203 1 0.412692087 0.273292589  
 0.237840369 0.813841944 1 0.226891675 0.212412 0.362177163  
 0.482374902 1 0.312006941 0.630122657 0.491218649 0.905461696 1  
 0.701015184 0.536187728 0.63782744 0.902771235 0.726530441 1  
 0.555892564 0.436145266 0.347347194 0.785636315 0.824751511  
 0.811301049 0.83314782 1.194923915 1.176156888 0.615272369 0.676857354  
 YMR083W YMR083W::ADH3::alcohol dehydrogenase isoenzyme III 1  
 0.991428261 0.980966189 0.711831374 0.692167043 1 0.852584377  
 0.893007745 0.667264728 0.665400241 1 1.021367672 0.904335429  
 0.786321152 0.706804708 1 1.263058698 1.283340263 1.763656098  
 1.535744813 1 1.211420959 1.277927273 1.60133413 1.664475471 1

|             |                                                                                                                         |             |             |             |             |
|-------------|-------------------------------------------------------------------------------------------------------------------------|-------------|-------------|-------------|-------------|
| 1.440590429 | 1.457560856                                                                                                             | 1.829865681 | 1.608445298 | 1.761004268 | 1           |
| 1.017445273 | 1.249009894                                                                                                             | 0.980747612 | 0.856623363 | 0.767229285 | 1           |
| 1.256872265 | 1.144139645                                                                                                             | 1.047646367 | 1.151146921 | 1.197993182 | 0.709255442 |
| YMR087W     | YMR087W::YMR087W::molecular_function                                                                                    | unknown     | 1           | 1.224728891 |             |
| 1.320260121 | 1.128318959                                                                                                             | 1           | 1.036335638 | 0.956274962 | 1.20137185  |
| 1.204480432 | 1                                                                                                                       | 1.040131533 | 1.021069542 | 2.270652135 | 1.210041925 |
| 1.240479843 | 1.093723083                                                                                                             | 1.679630585 | 1           | 1.419950299 | 1.997226694 |
| 1.368020465 | 1                                                                                                                       | 0.816324338 | 0.97064985  | 1.040505207 | 0.778644382 |
| 0.79374773  | 1                                                                                                                       | 0.852075745 | 0.951043237 | 1.203471713 | 0.969316003 |
| 1.264494258 | 1                                                                                                                       | 1.26947446  | 1.159508893 | 1.044296414 | 1.345388484 |
| 1.329197238 |                                                                                                                         |             |             |             |             |
| YMR089C     | YMR089C::YTA12::Mitochondrial ATPase (similar to E. coli FtsH protein) that resides in the inner mitochondrial membrane | 1           | 1.032971099 |             |             |
| 0.964682423 | 0.83326749                                                                                                              | 1           | 1.087305338 | 1.275281876 |             |
| 0.843695835 | 1                                                                                                                       | 1.07166803  | 1.220520094 | 0.63252372  | 0.892163316 |
| 1.035418982 | 0.734780739                                                                                                             | 0.744388024 | 1           | 0.773799993 | 0.495773149 |
| 0.602231436 | 1                                                                                                                       | 0.937851696 | 1.066433006 | 1.151539327 | 0.988050452 |
| 0.944998016 | 1                                                                                                                       | 0.968859534 | 0.992156409 | 0.970640344 | 0.802600195 |
| 0.559758039 | 1                                                                                                                       | 1.004632831 | 1.03633844  | 1.035070788 | 0.643552293 |
| 0.864413477 | 1.016599476                                                                                                             |             |             |             |             |
| YKL044W     | YKL044W::YKL044W::molecular_function                                                                                    | unknown     | 1           | 2.122750341 |             |
| 1.826173942 | 1.743005011                                                                                                             | 1.212755822 | 1           | 2.149800579 | 1.846374888 |
| 1.2857613   | 1.100023627                                                                                                             | 1           | 3.206979413 | 1.512315515 | 1.088133707 |
| 1.547896368 |                                                                                                                         | 1           | 0.715940743 |             | 1           |
| 1.899357272 | 1.617261191                                                                                                             | 1.119559174 | 1.26659498  | 1.039358978 | 1           |
| 2.085910389 | 1.176792085                                                                                                             | 0.836121564 | 1.300748914 | 0.524002033 | 1           |
| 1.345230833 | 0.916384365                                                                                                             | 0.873277469 | 0.71049195  | 1.010079946 | 0.614688067 |
| YMR091C     | YMR091C::NPL6::involved in nuclear protein targeting                                                                    | 1           |             |             |             |
| 0.658942707 | 0.845403203                                                                                                             | 0.702684988 | 0.748443927 | 1           | 0.778453941 |
| 0.771719122 | 0.85191381                                                                                                              | 0.736023657 | 1           | 0.794533761 | 0.92832854  |
| 0.921090383 | 0.824802056                                                                                                             | 1           | 0.93117443  | 0.628551577 | 0.799096565 |
| 1.108177508 | 1                                                                                                                       | 1.38769473  | 1.395429694 | 1.789547002 | 1.24725673  |
| 0.938272765 | 1.066210945                                                                                                             | 1.057806082 | 0.844797053 | 1.08156465  | 1           |
| 1.00677138  | 1.092886266                                                                                                             | 0.965747445 | 1.100563034 | 1.279405844 | 1           |
| 1.243681486 | 1.233087743                                                                                                             | 1.188052558 | 0.918999568 | 1.023604855 | 1.185594872 |
| YKL046C     | YKL046C::DCW1::Defective Cell Wall                                                                                      | 1           | 0.872600648 | 0.850187465 |             |
| 1.150433746 | 0.626099056                                                                                                             | 1           | 0.941740996 | 0.917640406 | 0.825578366 |
| 0.863807393 | 1                                                                                                                       | 0.946708387 | 0.937644654 | 0.636743208 | 0.996782931 |
| 1.045909666 | 0.755332339                                                                                                             | 0.772624998 | 1.118615961 | 1           | 1.084443264 |
| 0.747366351 | 0.72876527                                                                                                              | 1.006327949 | 1           | 1.402338506 | 1.188265944 |
| 1.716780705 | 1.75214699                                                                                                              | 1.420719893 | 1           | 1.145769406 | 0.962627019 |
| 0.9423644   | 0.99675725                                                                                                              | 0.640264201 | 1           | 0.934577606 | 0.799896884 |
| 0.900001512 | 0.661971713                                                                                                             | 0.627725202 | 0.643583653 |             |             |
| YMR093W     | YMR093W::UTP15::part of small (ribosomal) subunit (SSU) processosome (contains U3 snoRNA)                               | 1           | 0.606052935 | 0.48536054  | 0.648134201 |
| 0.590324772 | 0.519646224                                                                                                             | 0.57084026  | 0.655063676 | 1           | 0.323940361 |
| 0.304409504 | 0.20977188                                                                                                              | 0.66384553  | 1           | 0.231686798 | 0.364142817 |
| 0.358194746 | 0.519104679                                                                                                             | 1           | 0.465809198 | 0.419387353 | 0.487296408 |
| 0.77116424  | 1                                                                                                                       | 0.629741308 | 0.572916416 | 0.807029314 | 0.872740761 |
| 0.844247935 | 1                                                                                                                       | 0.502583633 | 0.564876518 | 0.416676118 | 0.709846765 |
| 0.668180471 | 1                                                                                                                       | 0.543785188 | 0.553723985 | 0.872830018 | 0.799388842 |
| 0.539464309 | 0.786310354                                                                                                             |             |             |             |             |
| YKL060C     | YKL060C::FBA1::aldolase                                                                                                 | 1           | 1.382284136 | 0.948546219 | 1.366971743 |
| 1.154035795 | 1                                                                                                                       | 1.465037355 | 1.33457992  | 0.977856579 | 1.336818714 |
| 1.157762413 | 1.211203623                                                                                                             | 0.98353881  | 1.330102391 | 1           | 1.282525517 |
| 1.144220813 | 1.360607249                                                                                                             | 0.847060501 | 1           | 1.030639501 | 0.263794865 |
| 0.399842109 | 0.886356181                                                                                                             | 1           | 1.68813033  | 1.312241387 | 1.63257927  |

1.671343528 1.971114041 1 1.210533137 0.792284006 1.169539173  
0.69186523 0.413513673 1 1.723976892 0.906408913 1.406041702  
0.940938205 1.366292477 0.950927634  
YMR107W YMR107W::YMR107W::molecular\_function unknown 0.726459298  
0.791478502 0.882217166 0.850724078 0.710697351 0.765572283  
0.951335633 1.08290874 0.693238386 0.874731982 3.076834158  
1.225694203 1 1.89419339 4.187339721 2.597612461 1.48041787 1  
1.601587806 2.340743912 2.621067082 1.20821882 1 1.133150681  
1.099061088 1.08535305 1.053281177 1.209947751 1 0.697852538  
1.051985612 0.818332883 1.110523228 1 0.821965577 0.886974786  
0.882029293 0.782103107 1.13076711 1.000838238  
YKL062W YKL062W::MSN4::Transcription factor. Multicopy suppressor of snf1  
mutation 1 0.828755479 0.954234664 1.308826117 1.03257221 1  
1.360175898 1.493687196 0.794316425 0.733062039 1 0.714487598  
0.868636267 0.825522223 1.042198814 1 1.276100934 0.653828119  
1.304261666 0.830579356 1 0.602622443 0.591513107 0.627145762  
0.465190423 1 0.970574448 1.49958916 1.379578114 1.118073466  
1.402748912 1 0.936085218 0.70391894 1.476881281 0.920982871  
0.647442673 1 1.393285164 0.845036488 1.548815931 1.685111047  
0.725892293  
YMR109W YMR109W::MYO5::contains proline-rich tail homology 2 (TH2) and SH3  
domains 1 0.886789275 0.819254521 0.465746789 1  
0.914928149 0.671804823 0.629243383 1 1.100523663 1.157037805  
1.157102788 0.771962863 1 1.27487314 0.798543 1.417833039  
0.703664997 1 0.998720833 1.160504926 0.864189598  
0.594597013 1.954011237 0.9406135 0.652586686  
1 0.470368672  
YMR109W YMR109W::MYO5::contains proline-rich tail homology 2 (TH2) and SH3  
domains  
1 0.947951425 0.881361964 1.265156788 1.15020208 0.77160933 1  
0.913613037 0.854675145 0.969608858 0.930424996 0.562160439 1  
0.737587015 0.81015958 0.934286274 0.57704594 0.902326744 0.747782872  
YPR146C YPR146C::YPR146C::molecular\_function unknown 1 1.425032991  
1.413071601 1.012297064 1.879448642 1 1.168023059 1.098428575  
1.754662585 1.614978656 1 1.196006587 1.297158939 2.192795437  
1.411186783 1 1.329093426 0.617531109 1.08010571 1.26828755 1  
1.921752864 3.76053854 2.462713479 1.035707736 1 0.946624981  
1.089757701 0.818224472 0.796060994 0.853498868 1 1.205757797  
1.533053418 1.211344951 1.201301102 1.972193814 1 1.138216496  
1.713568082 1.217492104 1.2823126 1.500819524  
YKL064W YKL064W::MNR2::Product of gene unknown 1 1.058716809  
1.040983248 1.458280924 0.947971175 1 1.358241798 1.281648157  
1.018180229 1 1.156325261 1.389235874 0.934653703 1.268883695 1  
1.024367291 0.910899915 1 0.790533594 1.059040949 0.631083839  
0.938996131 1 0.900026983 1.054781298 1.150775577 1.460511982  
1.156755112 1 0.935731314 0.60780649 1.160132627 1.312911767  
0.485593089 1 0.881867857 0.547735028 0.835686548 0.622485531  
0.799305202 0.528001259  
YMR111C YMR111C::YMR111C::molecular\_function unknown 0.861900885  
0.878028709 0.943715204 0.931978509 0.790605381 0.964379419  
0.946035702 0.919357272 1.035637921 1.060890173 0.978089756  
1.121921421 1 1.504095278 1.459907759 1 1.521831075  
1.598772873 0.84795689 1.067665129 1.103276 0.821213088  
0.967397628 1 1.115999744 1.187319632 1.261437719 1.360624763  
1.33646388 1 1.31962255 1.659031203 1.434046804 1.446039544  
1.282345705 1.197853659

YPR148C YPR148C::YPR148C::molecular\_function unknown 1 0.571424718  
0.706471188 0.701931801 0.867771383 1 0.68176292 0.673988196  
0.813033061 0.759455488 1 0.609867087 0.706030784 0.732796564  
0.813717133 1 1.019883603 0.848854174 0.728530546 1.148483674 1  
1.454977357 1.41701995 1.859210285 1.699390696 1 0.796693512  
1.135455035 0.795129426 0.731331669 0.864553146 1 1.160463556  
1.147070456 1.076728606 0.933522376 1.74113896 1 1.387034001  
0.787822168 1.407222246 0.708214461  
YKL066W YKL066W::YKL066W::molecular\_function unknown 1 1.408586334  
2.237259914 1.436923937 2.514011301 1 1.295707758 1.442521678  
2.746794946 2.224331405 1 1.25884831 1.953946206 4.089138621  
1.78088298 1 1.706301951 1.693108606 1.766243861 3.535319737  
0.568113502 1.209912977 1.015272195 0.357667082 1 1.106324346  
1.42177887 0.947664492 0.573060537 1.415276559 1 1.364848409  
1.949077977 3.269860433 1.740052722 2.150536648 1 1.446915951  
2.214806658 2.331290534 2.062378539 1.410630213  
YMR113W YMR113W::FOL3::FOLinic acid requiring 0.917308821  
0.728843504 1.007359144 0.809977068 0.739211062  
1.007328167 0.76919323 0.852519896 0.829681835 1.005421654  
1.502175589 0.919899651 0.772918006 1 1.222515331 1.067771196  
0.550750654 0.906947107 1 1.234138829 0.900938592  
1.054945405 1 1.165625977 0.990894753 1.324871481 1.044498324  
0.624159175 1 0.988173459 1.03456633 0.655101428 0.764836476  
0.703126049  
YPR162C YPR162C::ORC4::Part of complex that binds to origins of replication  
and thereby directs DNA replication and is also involved in transcriptional  
silencing 1 0.920679273 0.870792611 1.047200077 0.957316787 1  
0.968996441 1.166231869 1.045184016 1 0.877712852 0.917079905  
0.857314743 1.201038665 1 0.783193847 0.874680143 0.779712203 1  
0.859438011 1.165203653 0.930787863 0.936970426 1 0.993934074  
1.016858007 1.029753912 0.915374503 0.988008732 1 0.926961036  
0.697616221 0.798662518 0.914425047 1.231108438 1 1.019725787  
0.806337267 1.021216217 0.969472094 0.851982143  
YMR115W YMR115W::YMR115W::molecular\_function unknown 1 1.137186308  
1.016766438 1.227933466 1.064340185 1 1.104902397 1.223116172  
1.084031544 0.963363087 1 1.306797321 1.310252248 1.068992286  
1.305187228 1 1.054188776 1.114972725 1.096434434 0.667451973 1  
1.105082038 0.886898239 0.883484085 0.749479911 1 0.843377638  
1.251746557 0.984048608 0.886689502 0.885024469 1 1.497745263  
1.292587046 1.286066248 0.971291797 0.891991144 1 1.092186358  
1.381266215 0.858161738 0.824182981 0.725584709 0.850230918  
YKL068W YKL068W::NUP100::Participates in nucleocytoplasmic transport; member  
of GLFG-containing family of nucleoporins 1 1.538649056 1.335598348  
1.630682963 1 1.490398043 1.369531018 1  
1.37900162 1.324818118 0.806367897 1.430577439 1 0.804528575  
0.7319015 1 1 1.018082451 0.884963571  
1.129787868 1.022999733 1.119336735 1 0.871234973 0.710583023  
0.740048846 0.803116018 0.451985053 1 0.921961295 0.744419273  
1.127715169 0.992611297 0.474549451 0.740777918  
YPR164W "YPR164W::MMS1::sensitive to methyl methanesulfonate (MMS),  
diepoxybutane, and mitomycin C" 1 1.083109091 0.909077868 1.058256974  
1.013365092 1 1.203995395 0.984536723 1.067362564 0.866244656 1  
1.083186537 0.90945671 1.140119026 0.871389195 1 0.830870929  
0.62403557 0.423444941 0.502349766 1 0.700562665 0.396202531  
1 0.954198756 1.092512912 1.164696716 1.389136709 1.202473262 1  
0.983882123 0.635541553 0.789124713 0.972645436 0.750998384 1  
0.701096427 0.52670344 0.592377231 0.557850897 0.458792972 -17.51248

|                     |                                                                            |               |               |                                    |
|---------------------|----------------------------------------------------------------------------|---------------|---------------|------------------------------------|
| YKL070W             | YKL070W::YKL070W::molecular_function                                       | unknown       | 1             | 1.016878282                        |
|                     | 0.877383556                                                                | 1.056385425   | 0.840742906   | 1 1.018379981 1.146249426          |
|                     | 0.956577989                                                                | 1 1.115793408 | 0.923667362   | 0.691890379 0.982328623 1          |
|                     | 0.875044516                                                                | 0.943027114   | 0.756877263   | 1.064851849 1 0.787224358          |
|                     | 0.629636095                                                                | 1.245115706   | 1.169829696   | 1.132575498 1.273596604 1          |
|                     | 0.764422747                                                                | 0.592173974   | 0.91354833    | 0.834515115 0.426070612 1          |
|                     | 0.853775131                                                                | 0.737475419   | 0.91175597    | 0.782264278 0.86253191 1.019226366 |
| YPR166C             | YPR166C::MRP2::14 kDa mitochondrial ribosomal protein; homologous to       |               |               |                                    |
| E. coli S14 protein | 1                                                                          | 1.18879385    | 1.4577668     | 2.003902738 1                      |
|                     | 1.121554711                                                                | 1.060475556   | 1.463650308   | 1.323795564 1 0.915838855          |
|                     | 0.990546897                                                                | 1.538197537   | 1.077190738   | 1 1.4439224 0.763903238            |
|                     | 0.724875029                                                                | 1.407409586   | 1 1.648050221 | 1.9265056 1.811521866              |
|                     | 1.329775347                                                                | 1 0.734755307 | 0.943286586   | 0.471477011 0.518733468            |
|                     | 0.825373598                                                                | 1 1.113971754 | 1.657870424   | 1.122012172 0.876742197            |
|                     | 2.010257238                                                                | 1 1.304169733 | 1.685109589   | 0.94113883 1.933395562             |
|                     | 1.925607377                                                                |               |               |                                    |
| YKL084W             | YKL084W::YKL084W::molecular_function                                       | unknown       | 1             | 1.621522592                        |
|                     | 1.618408358                                                                | 0.949858536   | 1.843183359   | 1 1.210728955 1.01890507           |
|                     | 1.263621565                                                                | 1.37530208    | 1 1.701146429 | 1.607241245 1.457749198            |
|                     | 1.378519624                                                                | 1 1.15524638  | 0.709803228   | 0.558103791 1.013694045 1          |
|                     | 1.491397898                                                                | 1.523677851   | 0.890894983   | 0.893801332 1 1.007608518          |
|                     | 1.215113818                                                                | 1.433060849   | 0.985314688   | 0.666749588 1 1.264773493          |
|                     | 2.533948779                                                                | 5.289150839   | 3.885034512   | 1.355004275 1 0.935111558          |
|                     | 1.495818407                                                                | 1.105062385   | 1.002311764   | 0.436601972 1.497317073            |
| YPR168W             | YPR168W::NUT2::Negative regulator of URS2 of the HO promoter               |               |               | 1                                  |
|                     | 1.183489054                                                                | 1.170317492   | 1.090110384   | 1 1.249247069 1.353907158          |
|                     | 1.201976789                                                                | 1.238976578   | 1 1.387282645 | 0.82217156 1.396562905 1           |
|                     |                                                                            | 0.63077119    | 0.815759824   | 0.685694347                        |
|                     | 0.95993934                                                                 | 0.684756627   | 0.773136816   | 1.003253689 0.748496474 1          |
|                     | 0.991895909                                                                | 0.847494767   | 0.896120536   | 1.333492103 1 1.03550414           |
|                     | 0.96218477                                                                 | 0.822721169   | 1.149905458   | 0.855867481 6.968215952            |
| YKL086W             | YKL086W::YKL086W::molecular_function                                       | unknown       | 1             | 1.139155764                        |
|                     | 0.995072139                                                                | 1.688047769   | 0.937312305   | 1 1.645469742 1.880092863          |
|                     | 0.949338938                                                                | 1 1.305647183 | 1.378094054   | 0.780814607 1.060202641 1          |
|                     | 0.88490339                                                                 | 0.742569213   | 1.117504752   | 0.671282649 1 0.988804107          |
|                     | 1.043401573                                                                | 0.866498042   | 0.716109012   | 1 1.271816696 0.846050353          |
|                     | 0.923258901                                                                | 1.101397426   | 0.950147787   | 1 1.151870173 0.856114846          |
|                     | 1.060558026                                                                | 0.68840153    | 0.710880106   | 1 0.820047977 0.936844263          |
|                     | 0.69157608                                                                 | 1.189058225   | 0.693486067   | 1.024480042                        |
| YPR170C             | YPR170C::YPR170C::molecular_function                                       | unknown       | 1             | 1.633090597                        |
|                     | 1.598895897                                                                | 1.125632023   | 1.98420618    | 1 1.426795031 1.179560713          |
|                     | 1.470402161                                                                | 1.521213827   | 1 1.375770957 | 1.278074079 1.357909586            |
|                     | 1.201953472                                                                | 1 0.980689989 | 0.549422131   | 0.543161616 0.907940621 1          |
|                     | 1.080037626                                                                | 0.908592628   | 1.885227138   | 1 1.40848947 1.196395997           |
|                     | 0.954362832                                                                | 1.23440676    | 1.120994949   | 1 0.855470749 1.329462716          |
|                     | 0.726178924                                                                | 0.638220426   | 1.623558446   | 1 0.994668979 0.899039817          |
|                     | 0.901867921                                                                | 1.643706886   | 1.280214698   | 1.992044684                        |
| YPR172W             | YPR172W::YPR172W::molecular_function                                       | unknown       | 1             | 0.837289274                        |
|                     | 0.848853155                                                                | 1.078352075   | 0.636621662   | 1 1.130159525 0.968492347          |
|                     | 0.903560663                                                                | 1 0.922196112 | 0.738116705   | 0.724202193 0.859373753 1          |
|                     | 0.468589832                                                                | 0.796017146   | 0.810694314   | 1 0.904171439 1.605878102          |
|                     | 1.192059494                                                                | 0.516619187   | 1 1.088152709 | 0.997757103 1.044060492            |
|                     | 1.242041698                                                                | 1.202097025   | 1 0.915520926 | 0.507797766 0.605383387            |
|                     | 0.594067288                                                                | 0.638887235   | 1 0.903826946 | 0.528437523 0.816101349            |
|                     | 0.906857702                                                                | 0.689116088   |               |                                    |
| YPR186C             | YPR186C::PZF1::Transcription factor IIIA (TFIIIA) with putative Zn-fingers |               |               |                                    |
|                     | 1                                                                          | 0.938591936   | 0.915702646   | 1.250701233 1.281101329 1          |

|             |                                                                                                                                                                                                              |             |             |             |             |
|-------------|--------------------------------------------------------------------------------------------------------------------------------------------------------------------------------------------------------------|-------------|-------------|-------------|-------------|
| 0.925329868 | 0.971726257                                                                                                                                                                                                  | 1.069347705 | 1.11341467  | 1           | 0.836250387 |
| 0.813650227 | 0.738440887                                                                                                                                                                                                  | 1.07751094  | 1           |             | 0.756170117 |
| 1.08449683  | 0.372533432                                                                                                                                                                                                  |             |             | 1           | 0.787473467 |
| 0.567949577 | 0.736757388                                                                                                                                                                                                  | 0.965169327 | 1           | 0.734293635 | 0.740333939 |
| 1.118500957 | 2.180342589                                                                                                                                                                                                  | 1           | 0.892118734 | 0.759876346 | 1.037428383 |
| 0.542041175 | 1.531268543                                                                                                                                                                                                  |             |             |             |             |
| YPR188C     | "YPR188C::MLC2::Mlc2p is likely the regulatory light chain for the type II myosin, Myo1p." 1                                                                                                                 |             |             |             |             |
|             | 0.89296322                                                                                                                                                                                                   | 1.26172438  | 0.827128473 | 1.666803547 | 1           |
|             | 0.715693683                                                                                                                                                                                                  | 1.428044281 | 1           | 0.751947505 | 0.962987326 |
| 1.363784872 | 1.08901509                                                                                                                                                                                                   | 1           | 0.672456836 | 0.687011383 | 0.728951944 |
| 1.386777222 | 1                                                                                                                                                                                                            | 1.649214634 | 2.502603932 | 2.898749683 | 1.334406729 |
| 0.818650661 | 0.934676349                                                                                                                                                                                                  | 0.615878546 | 0.654373424 | 0.875273332 | 1           |
| 1.066059442 | 1.384559354                                                                                                                                                                                                  | 1.186292577 | 1.275228514 | 2.052980883 | 1           |
| 1.020142819 | 1.274649785                                                                                                                                                                                                  | 1.01610433  | 1.683712817 | 1.047295093 | 1.254769164 |
| YMR119W     | "YMR119W::ASI1::Amino acid Sensor-Independent (ASI) genes encode membrane proteins Asilp, Asi2p and Asi3p. Asilp and Asi3p have conserved ubiquitin ligase-like RING domains at their C-termini" 1.184498109 |             |             |             |             |
|             | 0.804005474                                                                                                                                                                                                  | 0.661783043 | 1.053333366 | 0.941313367 | 0.667789931 |
|             | 0.59225441                                                                                                                                                                                                   | 1.444347081 | 1.113775973 | 0.613497122 | 0.855636399 |
| 1.449774328 | 0.919935759                                                                                                                                                                                                  | 1.169977684 | 0.663856544 | 1           | 1.115896207 |
| 0.938322823 | 0.705125746                                                                                                                                                                                                  | 0.776572429 | 1           | 1.353231396 | 1.525724559 |
| 1.304270414 | 1.103321917                                                                                                                                                                                                  | 1           | 1.366071118 | 0.959226524 | 1.481043932 |
| 0.950353114 | 0.733543485                                                                                                                                                                                                  | 1           | 1.126925804 | 1.112646681 | 1.020033982 |
| 0.69316517  | 1.081227575                                                                                                                                                                                                  | 0.800320314 |             |             |             |
| YMR134W     | YMR134W::YMR134W::molecular_function unknown 1 0.938600837                                                                                                                                                   |             |             |             |             |
|             | 1.079399053                                                                                                                                                                                                  | 1.171708362 | 1           | 0.759340937 | 0.698847815 |
|             | 0.988227114                                                                                                                                                                                                  | 1           | 0.904456262 | 0.962001799 | 0.969734722 |
|             | 1.063301793                                                                                                                                                                                                  | 0.869992778 | 0.726330621 | 0.859128643 | 1           |
|             | 2.459472945                                                                                                                                                                                                  | 1.850746799 | 1.066129458 | 1           | 0.812914678 |
|             | 0.778954119                                                                                                                                                                                                  | 0.938455153 | 1           | 0.726969199 | 0.96601215  |
|             | 1.965506109                                                                                                                                                                                                  | 1.60482969  | 1           | 0.649393809 | 0.967291342 |
|             | 1.226738021                                                                                                                                                                                                  | 0.889226013 | 1.090151884 |             |             |
| YMR136W     | YMR136W::GAT2::Similar to GATA-family of DNA binding proteins 1                                                                                                                                              |             |             |             |             |
|             | 0.908619409                                                                                                                                                                                                  | 0.90888676  | 0.82702252  | 0.782970683 | 1           |
|             | 1.070177468                                                                                                                                                                                                  | 0.704974723 | 0.544819116 | 1           | 1.211445877 |
|             | 0.963320154                                                                                                                                                                                                  | 0.838558852 | 1           | 1.856351913 | 1.399989087 |
|             | 0.589804613                                                                                                                                                                                                  | 0.850326302 |             | 0.561228377 | 1           |
|             | 1.128065348                                                                                                                                                                                                  | 1.457824706 | 1.226265179 | 1           | 1.02788564  |
|             | 0.721645952                                                                                                                                                                                                  | 0.696490842 | 1.197286745 | 1           | 1.014374221 |
|             | 0.927120683                                                                                                                                                                                                  | 1.465664112 | 1.569053043 | 0.76879789  |             |
| YKL088W     | YKL088W::YKL088W::molecular_function unknown 1 0.817364054                                                                                                                                                   |             |             |             |             |
|             | 0.936805749                                                                                                                                                                                                  | 1.171141609 | 0.906444171 | 1           | 1.037651159 |
|             | 0.911388453                                                                                                                                                                                                  | 1           | 1.007912826 | 1.029944995 | 0.817085292 |
|             | 1.509991962                                                                                                                                                                                                  | 1.23401969  | 1.178662957 | 0.999182528 | 1           |
|             | 1.239322328                                                                                                                                                                                                  | 0.875408287 | 1.157863551 | 1           | 0.92404903  |
|             | 1.008753277                                                                                                                                                                                                  | 0.822704305 | 0.901371066 | 1           | 1.140875931 |
|             | 1.146585804                                                                                                                                                                                                  | 1.066743201 | 0.676168249 | 1           | 1.205482374 |
|             | 1.121880772                                                                                                                                                                                                  | 0.928980435 | 0.949626843 | 0.753036653 |             |
| YMR138W     | YMR138W::CIN4::Protein involved in chromosome segregation and microtubule function; homologue of human Arl2 1 0.96498803 1.094283992                                                                         |             |             |             |             |
|             | 0.914772272                                                                                                                                                                                                  | 1.286556447 | 1           | 0.852978506 | 0.812749197 |
|             | 1.155708353                                                                                                                                                                                                  | 1           | 0.831797408 | 0.866436709 | 0.719756422 |
|             | 0.948247768                                                                                                                                                                                                  |             | 0.97355422  |             | 0.848677711 |
|             | 1.240540522                                                                                                                                                                                                  | 1.38398032  | 1.001314018 | 1.046665033 | 1.087018311 |
|             | 0.890943536                                                                                                                                                                                                  | 1.103397585 | 0.768603304 | 1.108100154 | 1.410162512 |
|             | 0.981410222                                                                                                                                                                                                  | 1.094625301 | 0.842823204 | 1.51956317  | 0.976267652 |

|         |                                                                   |             |             |             |
|---------|-------------------------------------------------------------------|-------------|-------------|-------------|
| YKL090W | YKL090W::CUE2::Hypothetical ORF                                   | 1           | 0.894610866 | 1.00918504  |
|         | 1.208752938                                                       | 1.217269851 | 1           | 0.980785326 |
|         | 0.807219609                                                       | 0.998339964 |             |             |
|         | 1.170418877                                                       | 1           | 0.828983887 | 0.901982532 |
|         | 0.914100476                                                       | 1.011081367 | 1           |             |
|         | 0.692139895                                                       | 0.506146254 | 0.988118301 | 1           |
|         | 1.000065265                                                       |             |             |             |
|         | 1.898427505                                                       | 1.565131894 | 1           | 1.022975157 |
|         | 1.023234164                                                       | 1.052746783 |             |             |
|         | 0.864093836                                                       | 1.149157126 | 1           | 0.842037194 |
|         | 1.034838808                                                       | 1.162933059 |             |             |
|         | 0.88480421                                                        | 0.799881557 | 1           | 0.837631905 |
|         | 0.951809975                                                       | 0.877657901 |             |             |
|         | 1.192342462                                                       | 0.807817864 | 0.799444701 |             |
| YMR140W | YMR140W::YMR140W::molecular_function unknown                      | 1           | 1.234401726 |             |
|         | 1.109280201                                                       | 1.691149211 | 0.908745784 | 1           |
|         | 1.432572701                                                       | 1.784967558 |             |             |
|         | 1.116782596                                                       | 0.909384014 | 1           | 1.420574226 |
|         | 1.564406511                                                       | 0.928539735 |             |             |
|         | 1.677993748                                                       | 1.075239808 | 0.791633568 |             |
|         | 1.129598597                                                       | 1.25670666  | 1.514874187 | 1.125986118 |
|         | 1.187024259                                                       | 1           |             |             |
|         | 1.217306666                                                       | 0.75531797  | 0.848280004 | 0.890246665 |
|         | 0.499229051                                                       | 1           |             |             |
|         | 1.106288013                                                       | 0.93919678  | 1.052142676 | 0.809490775 |
|         | 0.943586757                                                       | 0.966688872 |             |             |
| YKL092C | YKL092C::BUD2::GTPase-activating protein (GAP) for Rsr1p/Bud1p    | 1           |             |             |
|         | 1.622405312                                                       | 1.285566178 | 1.489229347 | 1.144361455 |
|         | 1.618799271                                                       |             |             |             |
|         | 1.464326557                                                       | 1.105491398 | 1           | 1.357871822 |
|         | 1.143409072                                                       | 1.038091959 |             |             |
|         | 1.124130269                                                       | 1           | 0.999607968 | 0.618124556 |
|         | 0.797990186                                                       | 1           |             |             |
|         | 0.961313257                                                       | 0.802730073 | 0.735661992 | 0.693201212 |
|         | 1.069961132                                                       |             |             |             |
|         | 0.902830295                                                       | 1.060528902 | 1.138792895 | 1.253498498 |
|         | 0.86460438                                                        |             |             |             |
|         | 0.514145292                                                       | 0.816735532 | 0.771490071 | 0.455413742 |
|         | 0.837892681                                                       |             |             |             |
|         | 0.667612364                                                       | 0.794106395 | 0.925817791 | 0.846893504 |
|         | 0.83184279                                                        |             |             |             |
| YMR144W | YMR144W::YMR144W::molecular_function unknown                      | 1           | 1.261545339 |             |
|         | 1.318860934                                                       | 1.189803663 | 1.528548809 | 1           |
|         | 1.250378635                                                       | 1.016129214 |             |             |
|         | 1.216732136                                                       | 1.185068048 | 1           | 0.811460619 |
|         | 1.134148599                                                       | 1.077873139 |             |             |
|         | 1.345843922                                                       | 1           | 1.009288925 | 0.955865023 |
|         | 0.690351025                                                       |             |             |             |
|         | 0.472501363                                                       | 0.67945875  | 1           | 0.863750794 |
|         | 1.081068816                                                       | 0.825604758 |             |             |
|         | 0.777222157                                                       | 1.088046244 |             |             |
|         | 0.864003633                                                       | 0.871390641 | 0.728665129 |             |
|         | 1.261786546                                                       | 1.034839231 | 1           | 1.186372615 |
|         | 1.135178189                                                       | 1.098036461 |             |             |
|         | 1.311469407                                                       | 1.285149182 | 1.080519988 |             |
| YKL094W | YKL094W::YJU3::Product of gene unknown                            | 1           | 1.144850098 |             |
|         | 1.277518774                                                       | 1.18685899  | 1.453975299 | 1           |
|         | 1.243621054                                                       | 1.31500474  |             |             |
|         | 1.433659334                                                       | 1           | 1.078008099 | 1.391066021 |
|         | 1.397427789                                                       | 1.217712478 | 1           |             |
|         | 1.800304941                                                       | 1.077795436 | 1.536360831 | 2.133375888 |
|         | 1.921369868                                                       |             |             |             |
|         | 1.87686951                                                        | 2.454466855 | 1.593181208 | 1           |
|         | 0.966675444                                                       | 0.895629392 |             |             |
|         | 1.027496861                                                       | 0.892648181 | 1.154750007 | 1           |
|         | 1.633728845                                                       | 1.735764426 |             |             |
|         | 1.914402933                                                       | 1.177778489 | 1.246618409 | 1           |
|         | 1.178607892                                                       | 1.104788804 |             |             |
|         | 0.741653047                                                       | 1.288138482 | 0.715972711 | 1.240759256 |
| YMR146C | YMR146C::TIF34::p39 subunit of translation initiation factor eIF3 | 1           |             |             |
|         | 1.194024259                                                       | 1.009060726 | 1.090715702 | 1.005449929 |
|         | 1.151882433                                                       |             |             |             |
|         | 1.055069116                                                       | 0.932526527 | 1.079387767 | 1           |
|         | 0.942502725                                                       | 0.851118627 |             |             |
|         | 0.719301585                                                       | 0.945995061 | 1           | 1.283880351 |
|         | 0.821171414                                                       | 0.738091936 |             |             |
|         | 0.740213883                                                       | 1           | 0.721584613 | 0.266589285 |
|         | 0.807402261                                                       | 1           |             |             |
|         | 1.028545654                                                       | 1.000546431 | 0.845829049 | 1.039985806 |
|         | 1.119610448                                                       | 1           |             |             |
|         | 0.871441851                                                       | 0.796313212 | 0.582776505 | 0.618020524 |
|         | 0.723833711                                                       | 1           |             |             |
|         | 0.876147702                                                       | 0.775072617 | 0.913941705 | 1.130076401 |
|         | 0.648076405                                                       | 0.706628552 |             |             |
| YPR190C | YPR190C::RPC82::82-kDa subunit of RNA polymerase III (C)          | 1           |             |             |
|         | 0.737872779                                                       | 0.696047714 | 0.751606048 | 0.715810792 |
|         | 0.787352785                                                       |             |             |             |
|         | 0.827880456                                                       | 0.80192521  | 0.859965234 | 1           |
|         | 0.518696393                                                       | 0.420000746 |             |             |
|         | 0.417537766                                                       | 0.916360293 | 1           | 0.475198624 |
|         | 0.316697075                                                       | 0.425212644 |             |             |
|         | 0.540598776                                                       | 1           | 0.655200171 | 0.873073378 |
|         | 0.81849853                                                        | 0.707335917 | 1           |             |
|         | 0.826458179                                                       | 0.690914173 | 0.745460792 | 0.96737714  |
|         | 0.962085482                                                       | 1           |             |             |
|         | 0.591099183                                                       | 0.58052454  | 0.534514597 | 0.848146092 |
|         | 0.854361624                                                       |             |             |             |
|         | 0.795393186                                                       | 0.798908883 | 1.0739717   | 1.120663227 |
|         | 0.850558155                                                       | 0.769673503 |             |             |
| YKL107W | YKL107W::YKL107W::molecular_function unknown                      | 1           | 1.724963975 |             |
|         | 1.621821844                                                       | 1.675704531 | 1.805944835 | 1           |
|         | 1.634009427                                                       | 1.636990915 |             |             |

|         |                                                                                           |             |             |             |             |             |             |   |
|---------|-------------------------------------------------------------------------------------------|-------------|-------------|-------------|-------------|-------------|-------------|---|
|         | 1.65989002                                                                                | 1           | 1.55326203  | 1.611416046 | 2.130545974 | 1.559564187 |             |   |
|         | 0.549926216                                                                               |             |             |             |             | 0.940399065 |             |   |
|         | 0.955376227                                                                               | 1.093172749 | 1.165405131 | 1.012370546 | 1           | 0.681289361 |             |   |
|         | 0.851470306                                                                               | 1.220901613 | 1.105632252 | 0.775736821 | 1           | 0.864559731 |             |   |
|         | 0.947399429                                                                               | 1.058137833 | 1.017772217 | 0.954860184 | 0.852857756 |             |             |   |
| YMR160W | YMR160W::YMR160W::molecular_function unknown                                              |             |             |             | 1           | 1.153359405 |             |   |
|         | 1.107023354                                                                               | 1.348773298 | 0.870443517 | 1           | 1.315734979 | 1.249911338 |             |   |
|         | 1.032652792                                                                               | 0.900680654 | 1           | 1.236673107 | 1.456490144 | 0.9905632   |             |   |
|         | 1.13434603                                                                                | 1           | 1.091176084 | 0.877437406 | 0.780728586 | 0.754899768 | 1           |   |
|         | 0.666562011                                                                               | 0.846126664 | 0.830322742 | 0.766018577 | 1           | 1.179301707 |             |   |
|         | 1.084280945                                                                               | 1.479914266 | 1.382164271 | 1.128539888 | 1           | 1.223558129 |             |   |
|         | 1.144721593                                                                               | 0.937658397 | 0.970396765 | 0.338555834 | 1           | 1.145280833 |             |   |
|         | 0.812067735                                                                               | 1.017875621 | 0.856494434 | 0.649391216 | 1.267027951 |             |             |   |
| YPR192W | YPR192W::AQY1::Aquaporin                                                                  |             |             |             | 1           | 1.031715986 | 0.919847833 |   |
|         | 1.342064949                                                                               | 0.716833954 | 1           | 1.022323127 | 1.089735462 | 1.070214891 |             |   |
|         | 1.19319582                                                                                | 1           | 1.300153436 | 1.197673955 | 1.3786385   | 1.202489796 | 1           |   |
|         | 0.937970492                                                                               | 2.010566401 | 1.557864091 | 0.617340261 | 1           | 0.477002431 |             |   |
|         | 0.673463267                                                                               | 0.577155719 | 0.389088421 | 1           |             | 1.073983336 |             |   |
|         | 1.371061089                                                                               | 1.263802679 | 1           | 1.107743587 |             | 1.767203538 |             | 1 |
|         |                                                                                           | 0.697647049 |             | 0.967549456 | 0.810827823 |             |             |   |
| YMR162C | YMR162C::DNF3::Drs2 Neol Family                                                           |             |             |             | 1           | 2.728475386 | 2.942500581 |   |
|         | 2.889087857                                                                               | 1           |             | 3.001857176 | 1           | 2.541387762 |             |   |
|         |                                                                                           | 1           |             |             |             | 0.204893391 |             |   |
|         | 1                                                                                         | 1.137850577 | 0.943032418 | 0.932294645 | 1.304987933 | 1.014907008 | 1           |   |
|         | 1.006975673                                                                               | 1.050755236 |             | 0.815939107 | 0.865501265 | 1           | 0.765118044 |   |
|         | 0.944300524                                                                               | 0.821413497 | 0.854799858 | 0.838752689 | 1.280162299 |             |             |   |
| YKL109W | YKL109W::HAP4::Regulates respiratory functions; encodes divergent overlapping transcripts |             |             |             |             |             |             |   |
|         | 1                                                                                         | 1.128973288 | 1.128063328 | 1.155327375 | 1.110793639 | 1           |             |   |
|         | 1.297512264                                                                               | 1.157182213 | 0.854235147 | 0.829237889 | 1           | 0.604844614 |             |   |
|         | 0.741764513                                                                               | 0.834469711 | 0.772242072 | 1           | 1.551652774 | 1.825886003 |             |   |
|         | 1                                                                                         | 0.940027192 |             | 0.988563077 | 1           | 0.825397949 | 0.741094109 |   |
|         | 0.664462226                                                                               | 0.885953729 | 1.323309251 | 1           | 0.384401655 | 0.372780255 |             |   |
|         | 0.532981284                                                                               | 0.776569026 | 0.659220942 | 1           | 0.579749182 | 0.506758615 |             |   |
|         | 1.440725895                                                                               | 1.28513464  | 0.829215951 |             |             |             |             |   |
| YMR164C | YMR164C::MSS11::Multicopy Suppressor of STA10 - 11                                        |             |             |             |             |             |             |   |
|         | 0.901302076                                                                               | 0.955468287 |             | 0.977990044 | 1.02185441  | 1.052249961 |             |   |
|         | 0.919536128                                                                               |             | 1.025992845 | 1.002715731 | 0.731522301 | 0.976052012 | 1           |   |
|         | 1.404586157                                                                               |             | 1.442128554 | 1.171152005 | 1           | 0.796352349 | 1.454155978 |   |
|         | 0.823525122                                                                               | 0.538564735 | 1           | 0.861045391 | 0.852096931 | 1.032988663 |             |   |
|         | 0.72191568                                                                                | 1.089725028 | 1           | 1.224318116 | 1.169061904 | 1.075282583 |             |   |
|         | 0.856352259                                                                               | 0.826645334 | 1           | 1.328384618 | 1.368073599 | 1.312600689 |             |   |
|         | 1.31767005                                                                                | 1.126035091 | 0.95530575  |             |             |             |             |   |
| YPR194C | YPR194C::OPT2::oligopeptide transporter                                                   |             |             |             | 1           | 0.781783366 |             |   |
|         | 0.522868316                                                                               | 0.699138577 | 0.387969162 | 1           | 0.923792339 | 0.878548635 |             |   |
|         | 0.551509461                                                                               | 0.419172579 | 1           | 1.35035795  | 1.059445022 | 0.502640713 |             |   |
|         | 0.61922564                                                                                | 1           | 1.67867346  | 1.346692054 | 1.259809581 | 0.423530259 | 1           |   |
|         | 1.18944904                                                                                | 0.929068537 | 0.569049549 | 0.484170088 | 1           | 0.934733476 |             |   |
|         | 0.996642859                                                                               | 1.269161084 | 1.890250657 | 1.52295007  | 1           | 0.489417788 |             |   |
|         | 0.322643555                                                                               | 0.671610204 | 0.930554674 | 1.750932636 | 1           | 0.571851973 |             |   |
|         | 0.465070916                                                                               | 1.061912682 |             | 3.639137527 | 1.96752711  |             |             |   |
| YKL111C | YKL111C::YKL111C::molecular_function unknown                                              |             |             |             | 1           | 1.282988787 |             |   |
|         | 1.431351995                                                                               | 1.010959655 | 1.963414546 | 1           | 1.073395105 | 0.960432551 |             |   |
|         | 1.715473473                                                                               | 1.577395083 | 1           | 0.760923203 | 0.929163194 | 1.386618357 |             |   |
|         | 1.196066724                                                                               | 1           | 1.177731779 | 0.998016094 | 1.014030357 | 1.863069207 |             |   |
|         | 0.57277018                                                                                | 0.952722586 | 0.817790864 | 0.358754234 | 1           | 0.690180379 |             |   |
|         | 0.655118719                                                                               | 0.513978193 | 0.533747766 | 0.708433201 | 1           | 0.883268557 |             |   |



0.916635694 1.000817226 0.581054688 1.287473253 1 1.195792308  
 1.297514687 2.237967965 1.83267329 1.476302055  
 YPR196W YPR196W::YPR196W::molecular\_function unknown 1 0.996486693  
 0.781075989 0.934735607 1 0.970940478 0.810808264  
 0.946028704 1 0.890964089 0.67703053 0.724101541 0.776294608 1  
 1.074269534 1.198092138 0.409786782  
 0.435940726 1 0.828259683 0.707684325 0.927720829 0.968585344  
 0.729374825 1 1.107107576 1.223349574 1.033422579 1.203945295  
 1.797409322 1 0.858172628 1.232662467 0.911241401 0.758122843  
 0.818687629 1.574371933  
 YKL113C YKL113C::RAD27::DNA repair protein that belongs to the  
 RAD2 (pombe)/FEN1 subfamily 1 1.194359069 1.217104999 1.278558314  
 1.362368045 1 1.156646981 1.134319947 1.292313589 1  
 0.941048104 0.838295479 0.95265503 1.355864744 1 0.657827563  
 0.434091842 0.947718201 0.710141887 0.825245595 0.630001817  
 1 0.98190065 0.943065178 0.946395724 0.966742961 1.032259618 1  
 1.039521941 1.067273282 1.059624877 0.893266391 0.942890166 1  
 0.948971433 0.958923928 0.767221938 1.10911731 0.788926455 0.911524592  
 YKL115C YKL115C::YKL115C::molecular\_function unknown 1 1.601572536  
 1 1.870610955 1 1.408457072  
 1.630437076 1.844922558 1.759375836 1 1.34526938 1.621554017  
 1 0.907873819 2.187843347 1.515065 1 0.882640274  
 1.121107827 0.8914007 1.068082632 1 0.728936952 0.734655789  
 0.743305852 0.926973031 0.676006803 1 0.793032119 0.783180775  
 0.904321646 0.963007972 0.799027444 0.718887286  
 YKL117W "YKL117W::SBA1::SBA1p binds to Hsp90 and is important for pp60v-src  
 activity in yeast, shows similarity to the mammalian P-Twenty-Three proteins" 1  
 0.843397497 1.232915938 1.087161352 1.935766597 1 0.947032998  
 0.961150538 1.679800522 1 0.791579862 1.078094008 1.743851319  
 1.177526264 1 1.225382489 1.187490845 1.598964776 2.317835586 1  
 1.666526676 3.422840989 1.949216833 1 1.384813718 1.729551166  
 1.658830212 0.99907933 1.405036088 1 1.163923187 1.776882673  
 1.605654041 1.195604345 1.256087363 1 1.115102183 1.406333875  
 1.055468011 1.218918825 1.166965628 1.631287543  
 YMR167W "YMR167W::MLH1::Required for mismatch repair in mitosis and meiosis,  
 low levels of postmeiotic segregation, and high spore viability"  
 1.034281048 0.93724723 0.989737695 0.854773932 0.846852552  
 0.928336617 0.968868781 0.882267324 1 1.231849199  
 0.86830208 0.948985894 1 1.089334684 1.662616846 0.898284979  
 0.857768707 1 0.943936849 1.115362136 1.105714525 0.990964396  
 1.075299928 1 0.962784925 1.04270422 0.80011606 1.038191566  
 0.72540527 1 0.7193377 0.9248129 0.82178148 0.925346636  
 0.92530443 1.302052878  
 YMR170C YMR170C::ALD2::Expression induced in response to high osmotic stress.  
 NAD+ is preferred coenzyme. 1 1.067292397 1.38434537 2.273053177  
 1.800202975 1 1.314338392 2.291814292 2.06457715 2.869116039 1  
 1.000266387 1.737630372 4.34834317 2.509425154 1 2.788803515  
 5.079325894 10.99743968 6.387910332 1 2.209249211 2.316205796  
 6.587460834 5.036787865 1 1.015052828 1.355482102 1.790447006  
 1.066316822 1.058759 1 0.924718126 1.156253829 1.485892693  
 1.404700525 0.768608044 1 0.96225355 1.103390271 1.156710686  
 0.917816829 1.494385582 1.110291238  
 YMR172W YMR172W::HOT1::high osmolarity induced transcription  
 0.895145647 0.849745064 0.909256712 0.859912005  
 0.980069577 0.748697462 0.899795798  
 0.620259856 0.476164685 1 1.32560238  
 0.672952123 0.922399007 0.974256501 1 0.847335422 1.087134093

0.986112811 1.065869008 1.021856269 1 0.849441899 1.019947677  
 0.815503123 0.818046928 0.773336825 1.31080911  
 YKL131W YKL131W::YKL131W::molecular\_function unknown 1 1.100497003  
 1.107490451 1.252056788 1.176998323 1 1.129772103 1.429335484  
 1.217880813 1 1.167874629 1.099791357 0.804098852 1.132278102 1  
 0.967879473 1 1.17011168 0.553885819 1  
 0.879845535 0.829671459 0.734623647 1.051673251 1.253314665 1  
 0.855034336 0.719605497 0.811200461 0.856121552 0.579888165 1  
 0.829703686 0.674542578 0.905600014 0.923991066 0.71404455 0.622568686  
 YMR188C YMR188C::YMR188C::molecular\_function unknown 0.635344059  
 1.399607291 0.891162352 1.419505097 0.908046  
 1.266284516 0.913869076 1.043966667 1.264388432 1.028917438 1  
 0.961685543 0.885297842 0.540255473 1.41562436 1 1.391064169  
 2.071767733 2.191745151 1.285049454 1 1.179119513 1.292968317  
 0.67354569 0.620629373 1.239674989 1 1.123418865 1.66267666  
 1.297012252 1.17189573 2.48808022 1 1.477550881 1.625084519  
 0.889781917 1.93374678 1.949215077 1.180341195  
 YKL133C YKL133C::YKL133C::molecular\_function unknown 1 0.899141783  
 1.283239264 1.081145429 1.335848515 1 1.011907815 1.153368156  
 1.085751815 1 1.001222332 1.248232296 1.362852557 1.153236581 1  
 1.345336379 0.88385299 1.833683911 0.846867859  
 0.427243669 1 1.278854743 1.595074541 1.108286239 0.914205707  
 1.135237975 1 1.075065626 1.727082625 1.982005127 1.427629859  
 1.429262206 1 1.378770204 1.494076091 1.254126875 1.493500965  
 1.774593407 1.193475543  
 YMR190C "YMR190C::SGS1::Involved in maintaining genome stability. Homologous  
 to E. coli RecQ and human BLM and WRN proteins that are defective in the cancer-  
 prone disorder Bloom's syndrome and the premature aging disorder Werner's  
 syndrome, respectively" 1 1.268334535 1.30221764 1.426723984 1.270171105 1  
 1.427799614 1.303177399 1 1.159881297 1.19938006  
 0.970792055 1.093748313 1.124321724  
 0.876229998 1 0.957468422 1.005954674 0.948711849 0.959466657  
 1.125777551 1 0.954026769 0.935157128 0.91977665 0.858180879  
 1.028013675 1 0.703272514 0.867686606 0.78503634 1.064208616  
 1.085356981 1.049873177  
 YKL135C "YKL135C::APL2::Beta-adaptin, large subunit of the clathrin-  
 associated protein (AP-1) complex" 1 0.70245774 0.988002657  
 0.700532988 1 0.882436173 0.652870222 1 0.8911609  
 0.850422289 0.558905457 0.856384817 1.546849937 1.090010332  
 1.24589914 1.500451155 1 1.648127 1.005904684 1.549195757 1  
 1.081476813 1.106972367 1.156899005 1.160594065 1.051392441 1  
 1.142090906 0.746958735 1.273984195 1.176205786 0.482162162 1  
 1.111252791 0.796111598 1.055972634 0.796492533 1.030053835 0.680359857  
 YMR192W YMR192W::YMR192W::molecular\_function unknown 1 0.921589033  
 0.9242138 0.987443442 0.8921855 1 1.02702793 1.102354989  
 1.001695493 0.94604574 1 0.80704035 1.007768659 0.81853463  
 1.036910329 1 1.168241856 1.082430707 0.925145609  
 1.029417433 0.999555454 1.133585751 0.834786856  
 1.010456827 1 1.272564821 0.808379684 1.138193918 1.053110016  
 0.671859019 1 0.970398651 0.973903538 0.952579478 0.967568523  
 0.795559225 1.56211325  
 YKL137W YKL137W::YKL137W::molecular\_function unknown 1 1.042614362  
 1.42463197 1.156296026 1.939534396 1 1.091290346 1.074284831  
 1.612559622 1.76201647 1 1.084918532 1.404314882 1.939359333  
 1.16981005 1 1.70043721 1.74690975 1.890990212 2.117517362 1  
 1.929275259 2.332302812 1.957458762 1.112342734 1 0.897255508  
 1.06794392 0.589400457 0.608696884 0.960763547 1 1.17984983

1.850872316 1.60291928 1.216903056 1.954147854 1 1.387498366  
1.974190882 0.986484305 1.960083363 2.142921234 1.42551589  
YMR195W YMR195W::ICY1::Interacting with the cytoskeleton<br> Involved in  
chromatin organization and nuclear transport<br> Genetically interacts with  
<i>TCP1</i> and <i>ICY2</i> 1 1.247943933 1.647530967 0.938783311  
1.583283071 1 1.069162352 1.10956686 1.207727595 1.131452214 1  
2.841115718 2.729597155 3.750519075 2.115453558 1 2.040577195  
1.445800558 1.347380359 1.474828386 1 2.169172033 3.329843031  
2.60153605 1.183571235 1 1.403689369 1.453703462 1.187904232  
1.07955425 1.586483083 1 2.121041161 2.483455015 4.380175846  
1.815639727 2.752911987 1 0.980859406 1.176006983 1.048772854  
1.818609635 1.770487948 1.488560842  
YMR197C YMR197C::VTI1::Involved in cis-Golgi membrane traffic 1  
0.814752176 1.28681349 1.03749366 1.505481706 1 0.936910687  
1.101716278 1.329002145 1.303857787 1 1.00130556 1.494943689  
2.282309152 1.289577562 1 1.581874579 1.193368504 1.588152455  
2.235997683 1 1.869292612 3.767341746 3.769870223 1.315322826 1  
1.166525587 1.498691696 1.133109817 0.833978284 1.167090483 1  
1.062881155 1.636838636 1.446420124 1.546025686 2.421693967 1  
1.668202543 1.92429442 1.408342845 2.336660933 2.303589581 1.075266311  
YKL139W YKL139W::CTK1::putative kinase subunit of the kinase complex that  
phosphorylates the RPO21 CTD (carboxy-terminal domain); also called CTDK-I alpha  
subunit 1 1.316618005 1.297260247 1.486507837 1.545424161 1  
1.355967722 1.382032908 1.414802823 1 0.968952146 1.151293557  
1.02715915 1.355122123 1 1.575666339 1.278902561  
0.437726777 0.839968098 0.807250499  
0.819274003 1.016198099 1 0.808851464 0.974738971 0.983747701  
1.184106422 1 1.010185125 1.215903075 1.138940397 1.32890482  
1.087660054 0.992082006  
YMR199W YMR199W::CLN1::role in cell cycle START 0.941934537  
0.883722794 1.259032448 0.894777641 0.975363229 0.812212708  
0.910684128 0.676359539 0.643091915 0.653228412 1.156186003 1  
0.733462698 0.495123078 0.399309275 1  
0.787253992 0.70544713 0.897523674 0.77087668 1.247664535 1  
0.805414765 0.820204768 0.75371679 0.78364168 0.70426246 1  
0.788012082 0.904951762 1.196957637 1.528748831 1.23074873 0.949176408  
YKL141W "YKL141W::SDH3::Yeast succinate dehydrogenase (SDH) is a tetramer of  
non-equivalent subunits--Sdh1p, Sdh2p, Sdh3p, Sdh4p--that couples the oxidation  
of succinate to the transfer of electrons to ubiquinone." 1 1.353611362  
1.574105529 1.113802427 1.788898316 1 1.244981247 1.292911451  
1.094235703 1.692682386 1 1.181552424 0.979869796 2.093054523  
1.131373288 1 1.363062398 0.67774585 1.446302658 2.048849035 1  
1.250230753 0.820117189 1.703076393 1.670573234 1 1.151697994  
0.514899191 0.399485311 1.936832603 1.310710735 1 0.424825265  
0.159632271 0.114408628 0.200101286 0.817401517 1 0.286598878  
0.080800621 0.188584216 0.693212951 0.724936669 1.268779177  
YMR214W YMR214W::SCJ1::dnaJ homolog 1 1.36535548 1.425813391  
1.280292764 1.061077464 1 1.241613706 1.182874476 1.483979583  
1.287850933 1 1.130842472 1.362488284 1.201623839 1.326374008 1  
0.942260665 0.750213031 0.868302894 1 1.342582267  
1.603150956 1.20696195 1 1.07759172 1.013895407 1.328824309  
1.158596615 1.094471064 1 1.153185345 1.320421701 1.136514643  
1.30758155 0.909233215 1 0.666757582 0.889023152 0.73206436  
0.700352537 0.456175727 1.208361116  
YKL155C YKL155C::RSM22::mitochondrial ribosome small subunit component 1  
0.676477443 1.007368212 1.126425219 1.036553968 1 0.934944069  
1.045855304 1.074897648 1.124324102 1 0.841466684 0.841964869

0.93799174 0.989966594 1 0.660774782 0.588848176 0.744689104 1  
 1.260014301 1.796876509 1.713217538 1.350204524 1 1.03895392  
 1.341745435 1.12455554 1.032100711 1.149844445 1 1.260620042  
 0.853033605 0.987156303 0.780274252 0.505514764 1 0.8278221  
 0.675363678 0.626233552 0.642729628 0.839367005  
 YKL157W YKL157W::APE2::Removal of intron fused YKL158W and YKL157W <a href=http://genome-www4.stanford.edu/cgi-bin/SGD/reference/reference.pl?refNo=3684>(Davis et al.(2000) NAR 28:1700-6)</a>.  
 1 0.905172539 0.81092032 1.476312504 0.797708165 1 1.319216945  
 1.435243341 0.833709333 0.866683092 1 1.110103229 1.307788066  
 0.713231173 1.277180417 1 1.601699287 1.840684885 2.033319538  
 0.935404897 1 0.832847595 0.430846903 0.592898426 0.860026279 1  
 1.057519736 1.251382888 1.493047007 1.383109622 1.022761843 1  
 1.05111397 0.631026924 1.174535941 1.161072358 0.329689681 1  
 0.958675218 0.797640474 1.269961108 0.658740477 0.98394009 0.637454259  
 YKL159C YKL159C::RCN1::Regulator of calcineurin 1 1.031715986  
 1.217354893 0.829362261 1.05716057 1 0.968867199 1.076104588  
 1.052412458 1.081202974 1 1.003046028 1.18939651 1.334903429  
 0.921272626 1 1.197863141 1.096090475 1.214286765 1  
 1.444217803 1.976541036 1.213952859 1.237837749 1 0.959119708  
 0.974251992 1.132108679 1.00979159 0.996582244 1 0.936405135  
 0.827559999 0.774088543 0.868391865 0.874652061 1 0.78063329  
 0.89557063 0.928554924 1.093437557 0.812259916 1.186470537  
 YKL161C YKL161C::YKL161C::not yet annotated 1 0.961112866 0.959500854  
 0.970005112 1.051172096 1 1.185810283 1.18650317 1.101645003  
 1.141333104 1 0.948892451 0.968450311 0.699246331 1.156222328 1  
 0.417628954 0.790392228 0.855677269 1 0.787755145 1.336287254  
 0.517637885 0.726198175 1 0.99840205 0.997708916 1.087728365  
 1.135691252 0.991326723 1 0.944815248 1.149196072 1.021950461  
 0.926801934 0.949100917 1 0.985993003 0.865833276 1.091033718  
 1.077913261 0.857262916 0.938668951  
 YMR216C YMR216C::SKY1::SRPK1-like Kinase in Yeast (SRPK1 is a human serine kinase that specifically phosphorylates arginine-serine rich domains found in the SR family of splicing factors.) 1 1.140994246 1.055306184 1.034690756  
 1.16655585 1 1.133004334 1.063709719 1.331575702 1.086714624 1  
 0.967733362 1.119582645 1.133203396 1.378685093 1 0.84888144  
 0.429540977 1 0.91789577 0.254506462 1 0.792270657  
 0.761341073 1.205983733 1.065949927 0.947807298 1 1.005457658  
 0.760424846 0.930881313 1.210568099 0.58020222 1 0.70229571  
 0.597530988 0.976494777 0.608161167 0.632994303 0.665474232  
 YMR218C YMR218C::TRS130::targeting complex (TRAPP) component involved in ER to Golgi membrane traffic; 130kD subunit 1 1.651172759 1.716832136  
 1.542124291 1.618510683 1 1.55218958 1.617762676 1.602122957  
 1.229504704 1 1.539381658 1.739528522 2.197537277 1.270378546 1  
 2.699657137 2.335692098 1 1.850367394 2.089803098  
 1.69727174 1 1.169753688 1.418243816 1.531721691 1.131523222  
 1.300201711 1 0.878938805 0.988700734 1.154018487 1.198002966 1  
 0.896323573 1.030235537 0.834266606 0.72894755 1.125905723 1.058629408  
 YFL018WA YFL018WA 0.695677152 1.147928562 0.623925499 1.290281102  
 0.638053668 0.663422698 1.158032537 1.044498912 0.682387694  
 0.82501923 1.105463413 0.797876033 1 0.999293338 0.512188989  
 0.632599265 1.346047588 1 1.654391617 2.102495241 1.594573931  
 1.033908328 1 1.017525048 0.858717658 0.620958236 0.624968185  
 0.872936011 1 1.222584066 1.576184139 1.058694755 1.628832938  
 2.669756009 1 0.944078304 1.315484174 1.200987693 1.909544422  
 1.462370801 1.45090892

YMR220W YMR220W::ERG8::Involved in isoprene and ergosterol biosynthesis pathways 1 1.129596739 1.064338708 1.078651449 1.042194728 1  
1.175767058 1.030087086 1.212705077 1.124717422 1 0.797814188  
1.019220649 0.829776237 0.897084008 1 0.855247619 0.700170984  
0.782757166 0.638791048 1 1.158617894 0.889394238 1.280291422 1  
0.729637646 0.659287158 0.834220781 0.861835436 0.867619261 1  
0.619821634 0.473607606 0.51742255 0.831899633 0.812019946 1  
0.623321921 0.492557358 0.94537348 0.921482221 0.759480307 0.661096116  
YKL163W YKL163W::PIR3::Protein containing tandem internal repeats 1  
1.057063033 0.77102858 0.739982429 0.487399749 1 1.209263781  
1.271242381 0.459646454 0.595146862 1 1.319995303 1.438690999  
1.552936949 0.478452695 1 1.736203841 2.417350134 3.202128664  
1.505708043 1 0.665299616 0.399552303 0.688432108 0.865307603 1  
0.837180248 0.918871637 1.098165923 1.028877473 1.063724802 1  
0.616555825 0.643280502 0.506274047 0.311989086 0.581168866 1  
0.575412873 0.5343883 0.522423806 0.591207249 0.757138318 1.04024128  
YMR142C YMR142C::RPL13B::Homology to rat L13 1 1.688654089  
1.717223936 1.279209284 2.265656776 1 1.310999718 1.074065031  
1.768476193 1.688430618 1 1.079816846 1.261883314 1.214241378  
1.291262424 1 0.865508337 0.622741831 0.281641072 0.558915981 1  
1.122740362 1.242791136 0.597843403 0.93594008 1 1.092743334  
0.932314649 0.822049615 0.99386658 1.232922322 1 1.237035414  
1.738704546 0.875379072 0.773321012 1.725231976 1 1.256125572  
1.354831277 0.880540301 1.795861602 1.102051184 1.339704695  
YMR222C YMR222C::FSH2 1 1.243777742 1.332182107 0.769220954  
0.533286179 1 1.137493173 1.256185784 0.998687806 0.837993349 1  
1.264523838 1.360120667 1.858823049 0.758740564 1 0.501898372  
0.751287316 0.756517319 0.970811344 1 1.089745293 0.983930573  
1.078259531 1.100613374 0.952952911 0.86793816 0.920406999  
1.004458993 0.920510876 1 0.874000296 0.492551667 0.714788351  
0.763575747 0.611877822 1 0.729091934 0.52442615 0.691552876  
0.610097612 0.579193299 2.879051806  
YKL165C YKL165C::MCD4::Required for GPI anchor synthesis 1  
1.402786905 1.236495658 1.577793287 1.454471638 1 1.341853793  
1.263744644 1.229641758 1.137658462 1 1.064550256 0.984588666  
0.921563264 1.431063944 1 0.767953552 1  
1 1.164951349 0.900794934 1.207812295 1.350420642  
1.249167959 1 0.796410309 0.595388781 0.826413903 0.734326709  
0.470782331 0.832890286 0.770376451 0.736139815 0.758413101  
0.628213062 70.57529306  
YMR172CA YMR172CA::YMR172C-A::molecular\_function unknown 1 1.093127698  
1.590391138 1.384655834 1.668490169 1 1.195648085 1.188006249  
1.544493826 1.719740451 1 1.030835993 1.303794477 1.855077093  
1.476002207 1 1.024634116 0.896182762 0.898238317 1.153418635 1  
1.295279376 1.93610606 1.435902327 0.94881179 1 0.862478005  
1.039653455 0.835615713 0.810664232 0.945262832 1 1.308907634  
1.553876763 0.848477962 1.680336152 1.836597313 1 1.010835699  
1.364877497 1.27611149 1.357115751 1.2710391 0.637454259  
YMR224C "YMR224C::MRE11::Disp. for premeiotic DNA synthesis, but required for both double strand break formation & resection, synaptonemal complexes, meiotic recombination & viable spores. Localizes to discrete sites in rad50 mutants" 1.033049777 1.075044199 0.818482865 0.864459776  
0.722735348 0.854612075 0.989823848 0.817615243 0.923167165  
1  
0.677171462 0.74514987 0.920886057 1 0.991284335 0.799249149  
0.836863322 1.157073472 1 0.782745891 0.839222824 0.826964857  
0.299004596 0.656718

YKL179C YKL179C::COY1::CASP Of Yeast 1 0.662257311 1.00642704  
 1.071310564 1.029389176 1 0.888855904 1.07326989 0.903989548  
 0.853917341 1 0.8183923 0.990546838 0.631553811 0.975230711 1  
 1.359399692 1.076139627 0.887773105 1 1.468507626 1.372424793  
 0.972194781 1 0.778956559 0.981106183 1.018804228 0.867065497  
 1.015064689 1 0.997885056 1.063936686 0.955553935 1.045311994 1  
 0.953989117 1.083189167 0.916333709 0.873582766 0.79016045  
 YMR116C YMR116C::ASC1::WD repeat protein (G-beta like protein) that  
 interacts with the translational machinery 1 1.825124219 1.029464759  
 1.123518372 1.018844374 1 1.330201718 0.995457534 0.967414168  
 1.053996261 1 1.07169873 0.963506419 0.537658286 0.762446989 1  
 0.830120362 0.369826826 0.276827948 0.644117963 1 0.973859462  
 0.199035862 0.160365489 0.490237218 1 1.176018472 0.843252261  
 1.390450082 1.710667163 1.127411601 1 1.014030295 0.83637287  
 0.499207488 0.378258583 0.431289073 1 0.873875571 0.735985973  
 0.701747295 0.968806654 0.623376165 0.83184279  
 YMR240C YMR240C::CUS1::cold sensitive U2 snRNA Suppressor 1  
 1.314099777 1.534627779 1.223518195 1.675807286 1 1.157860715  
 1.33067863 1 1.260450133 1.488885259 1.379414258  
 0.512131268 0.282892582  
 0.823990445 0.857813715 0.785023312 0.639906325 1.026723612 1  
 1.04357637 1.421117845 1.274880984 1.373838832 1.507873263 1  
 0.932249179 1.027722962 0.985051195 0.761420021 1.092810976 1.727606195  
 YMR174C YMR174C::PAI3::Cytoplasmic inhibitor of proteinase Pep4p 1  
 1.41492477 1.644219638 1.276672971 1.779408021 1 1.29765439  
 1.278379984 1.647033983 1.957749647 1 1.665196489 1.94396971  
 3.017106921 1.626199455 1 1.925449112 1.641568394 2.325108514  
 2.972117838 1 1.392445553 2.84014717 4.216387147 1.570551979 1  
 1.179453112 1.358087122 1.297152377 0.857229487 0.778514576 1  
 1.473291084 2.523274065 2.090808768 2.309738889 2.151329504 1  
 1.505217928 1.689783982 1.457903438 1.317962589 1.593644753 1.499068299  
 YMR242C YMR242C::RPL20A::Homology to rat L18a 1 1.028057394  
 1.024166727 0.68884162 1.336129825 1 0.804636267 0.7169177  
 1.164028059 1.016111241 1 0.795278966 0.72285147 0.704857058  
 0.808675625 1 0.732268899 0.249884683 0.180854908 0.476811872 1  
 1.322397323 0.94969918 0.488074977 0.865861837 1 1.270623731  
 0.901672133 0.853868709 1.139162643 1.02268977 1 1.100812763  
 1.615628415 0.866286427 0.680602579 1.595558828 1 1.183326422  
 1.479965311 0.964400114 2.018646653 1.13062781 1.369475945  
 YKL181W YKL181W::PRS1::ribose-phosphate pyrophosphokinase 1  
 1.417500863 0.996614656 1.119463648 1.330334302 1 1.200527341  
 0.917715504 1.03069404 1.155704698 1 0.813385636 0.714863844  
 0.562526577 1.123520822 1 0.437315782 0.783666255 0.557403842  
 0.690412683 1 0.73538798 0.378633011 0.308996517 0.563346862 1  
 1.140128787 0.871670561 1.156949567 1.397796423 1.327727948 1  
 1.090360586 0.552913175 0.742393433 0.690681997 0.554546861 1  
 0.704065991 0.491638473 0.575283375 0.768691134 0.456430188 0.946549518  
 YMR244W YMR244W::YMR244W::molecular\_function unknown 1 1.962234932  
 2.241419188 2.011487629 1 1.98043826 1.682175626 2.001889167 1  
 1.53707988 1.431261629 1.952654766  
 1 0.857225433 0.782923343 0.861349924  
 0.718048542 0.780986038 1 0.581458617 1.00262666 1  
 0.892665814 0.810142265 1.418359984 0.822965497 0.939544512  
 YKL183W YKL183W::LOT5::LOw Temperature responsive 1 1.058704934  
 1.085853231 0.985931268 0.776402399 1 1.069978565 1.069184932  
 1.00329297 1.209793825 1 1.027036197 0.903140177 1.138667575  
 1.066112057 1 0.753435499 0.445544548 0.546812001 0.500582367 1

|             |                                                                                                                                                                                                                                        |             |             |             |             |
|-------------|----------------------------------------------------------------------------------------------------------------------------------------------------------------------------------------------------------------------------------------|-------------|-------------|-------------|-------------|
| 0.900700819 |                                                                                                                                                                                                                                        | 0.966084382 | 1           | 1.143639803 | 0.957187646 |
| 1.039594712 | 1.277266812                                                                                                                                                                                                                            | 1.195074997 | 1           | 0.927019861 | 0.827738531 |
| 0.822446928 | 0.734976325                                                                                                                                                                                                                            | 0.672464948 | 1           | 0.808629033 | 0.600029195 |
| 0.832859797 | 0.781261688                                                                                                                                                                                                                            | 2.821260426 |             |             |             |
| YMR246W     | "YMR246W::FAA4::acyl-CoA synthetase (long-chain fatty acid CoA ligase) (fatty acid activator 2), activates imported fatty acids and provides substrates for N-myristoylation"                                                          |             |             |             |             |
|             | 1                                                                                                                                                                                                                                      | 1.336871484 | 1.037562249 | 1.344668563 |             |
| 1           | 1.414569583                                                                                                                                                                                                                            | 1.252198194 | 0.956980894 | 0.947540883 | 1           |
| 0.931216875 | 0.495096917                                                                                                                                                                                                                            | 1.245486667 | 1           | 0.590486849 | 0.269272295 |
| 0.295145175 | 0.427043646                                                                                                                                                                                                                            | 1           | 0.504099104 | 0.199377722 | 0.491918089 |
| 1.170692761 | 1.187307859                                                                                                                                                                                                                            | 1.171006123 | 1.675046108 | 1.058489679 | 1           |
| 1.671272323 | 1.065147451                                                                                                                                                                                                                            | 1.132797111 | 0.700366506 | 1.019155968 | 1           |
| 0.71322829  | 0.664592308                                                                                                                                                                                                                            | 0.530268405 | 0.775274141 | 0.164610156 | 0.72238979  |
| YKL185W     | YKL185W::ASH1::Zinc-finger inhibitor of HO transcription which is asymmetrically localized to the daughter cell nucleus                                                                                                                |             |             |             |             |
|             | 1                                                                                                                                                                                                                                      | 0.674875526 |             |             |             |
| 0.66632571  | 0.810510341                                                                                                                                                                                                                            | 0.710295883 | 1           | 0.808771062 | 0.862407305 |
| 0.571905483 | 0.598472112                                                                                                                                                                                                                            | 1           | 0.706244831 | 0.638439539 | 0.433136626 |
| 0.427930154 | 1                                                                                                                                                                                                                                      | 1.029721734 | 0.891216053 | 0.992709549 | 0.828488981 |
| 0.595298003 | 0.781172545                                                                                                                                                                                                                            | 0.653034203 | 0.83270413  | 1           | 1.037268879 |
| 1.102624483 | 0.900128525                                                                                                                                                                                                                            | 0.948994084 | 1.217734855 | 1           | 0.73760321  |
| 0.729169694 | 0.583858715                                                                                                                                                                                                                            | 0.468464895 | 0.989733664 | 1           | 0.710114662 |
| 0.692072531 | 0.821736333                                                                                                                                                                                                                            | 1.07645365  | 0.791059707 |             |             |
| YMR250W     | YMR250W::GAD1::glutamate decarboxylase                                                                                                                                                                                                 |             |             |             |             |
|             | 1                                                                                                                                                                                                                                      | 1.227386321 |             |             |             |
| 1.645232198 | 2.9838149                                                                                                                                                                                                                              | 0.996071936 | 1           | 2.463759697 |             |
| 1.664701107 | 1                                                                                                                                                                                                                                      | 1.744245511 | 3.390125514 | 4.138522917 | 1.751748467 |
| 4.179731786 | 5.862781994                                                                                                                                                                                                                            | 7.991494024 | 3.064754676 | 1           | 2.669823929 |
| 1.63179074  | 3.232643584                                                                                                                                                                                                                            | 2.139211489 | 1           | 1.1903533   | 1.06097912  |
| 1.045407736 | 1.235227468                                                                                                                                                                                                                            | 1           | 1.399206857 | 0.892521648 | 3.968260739 |
| 0.392793995 | 1                                                                                                                                                                                                                                      | 1.767022996 | 1.105072233 | 1.339170632 | 0.958142686 |
| 2.024737165 | 0.877375225                                                                                                                                                                                                                            |             |             |             |             |
| YKL187C     | YKL187C::YKL187C::molecular_function unknown                                                                                                                                                                                           |             |             |             |             |
|             | 1                                                                                                                                                                                                                                      | 1.114353413 |             |             |             |
| 1.029508026 | 1.105193786                                                                                                                                                                                                                            | 1.009440147 | 1           | 1.167155131 | 1.36377495  |
| 0.943150521 | 0.953783861                                                                                                                                                                                                                            | 1           | 1.380469541 | 1.155174038 | 1.469929803 |
| 1.017424854 | 1                                                                                                                                                                                                                                      | 0.872276583 | 1.178068865 | 0.679466239 | 1           |
| 0.74720111  | 1.343947505                                                                                                                                                                                                                            | 0.563223577 | 1           | 0.97946153  | 1.079223296 |
| 1.179907846 | 1.423356834                                                                                                                                                                                                                            | 1.33940094  | 1           | 0.849863954 | 0.541844727 |
| 0.997579278 | 1.134463604                                                                                                                                                                                                                            | 0.352029589 | 1           | 0.555017724 | 0.49128587  |
| 0.572702723 | 0.485161758                                                                                                                                                                                                                            | 0.485671072 | 0.934290836 |             |             |
| YKL189W     | "YKL189W::HYM1::The homolog in Aspergillus nidulans, hymA, is involved in development, see Karos, M. and Fischer, R. (1996). hymA (hypha-like metulae), a new developmental mutant of Aspergillus nidulans. Microbiol. 142:3211-3218." |             |             |             |             |
|             | 1                                                                                                                                                                                                                                      | 0.894982596 | 0.922043617 | 1.155902689 | 1.190909567 |
| 1.068269447 | 1.498067985                                                                                                                                                                                                                            | 0.857413103 | 0.969404187 | 1           | 0.87511762  |
| 1.032568196 | 0.977981314                                                                                                                                                                                                                            | 0.94484044  | 1           | 1.526940253 | 1.611501208 |
| 1.256909188 | 0.61933685                                                                                                                                                                                                                             | 0.584828539 | 0.428885871 | 1           |             |
| 0.885572286 | 1.022796237                                                                                                                                                                                                                            | 1.025938744 | 0.94119328  | 1.001195489 | 1           |
| 0.832969289 | 0.930375404                                                                                                                                                                                                                            | 1.155160672 | 1.011257284 | 0.976724001 |             |
| 0.840844251 | 0.823161502                                                                                                                                                                                                                            | 0.942592648 | 1.01738344  | 0.948201767 | 0.992082006 |
| YKL203C     | "YKL203C::TOR2::putative protein/phosphatidylinositol kinase involved in signaling activation of translation initiation, distribution of the actin cytoskeleton, and meiosis"                                                          |             |             |             |             |
|             | 1                                                                                                                                                                                                                                      | 1.098278258 | 0.902931706 | 1.035417866 |             |
| 0.91633854  | 1                                                                                                                                                                                                                                      | 1.19266122  | 1.092987514 | 0.781267951 | 0.943931469 |
| 1.199710777 | 0.900044171                                                                                                                                                                                                                            | 0.782626924 | 0.788949305 | 1           | 1.772083305 |
| 1.248713882 | 1.481522534                                                                                                                                                                                                                            | 1.637981088 | 1           | 0.654918454 | 0.474892384 |
| 0.461663161 | 0.59703603                                                                                                                                                                                                                             | 1           | 0.876242225 | 0.863215665 | 0.799983722 |
| 1.081675725 | 1.005000871                                                                                                                                                                                                                            | 1           | 0.918330184 | 0.556704182 | 0.64413784  |

1.129907855 0.738221635 1 0.848523209 0.660906709 0.490253482  
 0.831364448 0.873423832  
 YKL205W YKL205W::LOS1::Nuclear pore protein involved in pre-tRNA splicing 1  
 1.064836852 1.274355094 1.22415307 1.578704781 1 1.13824713  
 1.196606144 1.215364332 1.296500882 1 1.135077723 1.281761102  
 1.504104439 1.128421707 1 1.157469189 1.047456067 1.447819559  
 1.798078501 1 1.618963938 2.82008552 2.873704703 1.117740167 1  
 1.097235813 1.015027463 0.997723279 1.10719588 1.173885357 1  
 1.066982443 0.922841624 1.057174152 0.831295538 0.917911988 1  
 0.920346977 0.943606989 0.958516079 1.121829427 0.778121919 1.102410567  
 YAL020C YAL020C::ATS1::Protein with similarity to human RCC1 protein 1  
 1.129915457 1.248552811 0.970777619 0.775820754 1 1.106159959  
 1.437080817 1.094488632 1 1.455689405 1.272824521 1.412115397  
 0.906295718 0.729681325 0.63693636 0.847184179 1  
 1.319440966 1.408182858 1.322277875 1.024242677 1.003237121  
 1.065893877 1.082023435 1.042990512 1 0.852677465 0.97217155  
 0.760780385 0.910233755 1.153320124 1.132738704 1.060416705  
 1.068252599 1.147018303 0.844977137  
 YAR009C YAR009C 1 1.041969085 0.871257746 1.239518826 0.860035461 1  
 1.18084025 1.030109022 0.910244906 0.874409924 1 1.101829192  
 1.244093176 0.977944677 1.274794319 1 1.296411236 1.415753438  
 1.391172765 1.090277386 1 0.619242367 0.537982163 0.464154595  
 0.696638629 1 0.958398787 0.909857187 1.2780058 1.328208429  
 0.921341258 1 1.356505983 1.897308952 3.29287055 1.440503196 1  
 1.311086123 1.886543248 2.943923877 1.356740515 1.342164576 0.696121095  
 YMR252C YMR252C::YMR252C::molecular\_function unknown 1 1.583222649  
 1.83282871 1.308250736 2.07241072 1 1.358838172 1.230878106  
 1.798470797 1.74088512 1 1.644686142 1.632049933 3.072814203  
 1.548921066 1 1.489870575 0.806188154 1.008670519 1.230148816 1  
 1.456647689 1.191281351 1.899959392 1.388762033 1 1.180658468  
 1.187209548 0.926330291 0.780787786 1.060790252 1 1.039580898  
 1.321209221 1.266441744 1.204594211 1.846018398 1 1.251520843  
 1.658512184 1.005376342 1.809355352 2.041203965 1.443028354  
 YMR268C YMR268C::PRP24::U4/U6 snRNA-associated splicing factor 1  
 2.81071509 2.183499398 1.704759518 1.862623715 1 1.990839854  
 1.783039171 2.02845238 1.865638787 1 2.048289216 1.956921327  
 2.321519604 1.979849057  
 1 0.976078619 0.824142242 0.990869182 0.777641577 1.009524333 1  
 0.87263919 1.214751021 0.918237546 1 0.654014087  
 1.027129112 0.959819732 0.868697127 0.949626843 0.800320314  
 YMR270C YMR270C::RRN9::Upstream activation factor subunit 1  
 0.844131281 1.129985106 0.92032094 0.994619149 1 0.913878762  
 0.827991439 1.171829138 1.059038205 1 0.875443851 0.904067157  
 0.803443794 1.013040836 1 0.425522229 0.432185273 0.711787852 1  
 1.253898179 1.239234642 1 1.045386072 1.073617186  
 0.871073898 0.79578197 1.274620328 1 1.164225014 1.369911408  
 1.295948867 1.205504075 1.637518884 1 0.955024216 1.227211525  
 1.05672475 1.232968377 1.19089698 0.83184279  
 YKL207W YKL207W::YKL207W::molecular\_function unknown 1 0.865061601  
 0.892757354 0.805692924 0.775105538 1 0.83356728 0.977928441  
 0.92777732 0.977130033 1 0.906461929 1.03440569 1.044986987  
 0.877756074 1 1.027076634 0.571635182 0.691847026 0.903114674 1  
 1.183526312 0.98031774 0.96189059 0.631549929 1 1.110624714  
 1.01289857 1.611588803 1.304429199 1 0.929373772 0.751174804  
 0.987805788 0.962590299 0.386395851 1 0.862962584 0.556377065  
 0.944558278 0.724573726 0.711546253 0.889634012



YMR272C "YMR272C::SCS7::Required for the hydroxylation of the very long chain fatty acid (VLCFA), located in the endoplasmic reticulum" 1  
1.612797538 1.121499993 1.210179633 1.199798623 1 1.34390677  
1.313089358 1.210717276 1.053117286 1 1.174234767 0.886278778  
1.097335607 0.986495061 1 0.915282629 0.790278367 0.588211682 1  
0.963162554 0.740908757 1 0.786078442 0.443677879  
0.560277946 1.332771508 1.198147479 1 0.67734585 0.293852203  
0.283516533 0.471866192 0.995571608 1 0.694507383 0.333292324  
0.651689088 1.299649856 1.032429263 0.867743381

YKL209C "YKL209C::STE6::ABC transporter, glycoprotein, component of a-factor secretory pathway" 1 1.261742328 1.138031797 1.180411765 1.113566055 1  
1.051963789 1.389028328 1 1.122169635 1.27329493  
1.210387631 1.206658382 1 0.837386024 0.780445619 0.687569136  
0.593720326 1 0.562207696 0.329405348 0.335756274 0.519427145 1  
0.863848377 0.892344813 0.717534244 0.907157099 0.983589885 1  
0.766804691 1.119050262 0.96620289 0.965922032 1 0.810305263  
1.147372419 0.886104515 1.13088144 1.117692327 0.936917726

YMR275C "YMR275C::BUL1::Involved in the ubiquitination pathway, possibly by functioning with Rsp5" 1 0.952727131 0.922764029 1.139966319 0.857975918 1  
1.153100273 1.131741146 0.815994269 0.844990147 1 1.133968155  
1.203627157 0.805011092 0.945918412 1 1.205809069 0.98546078  
1.158999806 0.74528001 1 0.942657341 1.092621492 0.955019463  
0.777633986 1 0.883104264 0.803309425 1.13277396 0.820371676  
0.805997249 1 1.100722134 0.716364046 1.262224398 1.114385364  
0.408438304 1 0.714341074 0.606584898 0.643856353 0.659051272  
0.392276995 0.770549116

YMR277W YMR277W::FCP1::TFIIF interacting Component of CTD Phosphatase 1  
0.754650321 0.82735486 0.633082141 1 0.944947623 0.91144605  
0.660596984 1 0.689230226 0.634689967 0.506163046 0.721741577  
1.072184786 0.941148882 1.147991736 0.64776581 1 0.672091669  
0.777125857 0.666293049 0.746599291 1 0.808643241 0.829677626  
0.854196239 0.950533034 0.791789872 1 0.668552332 0.665478925  
0.884332957 0.860435413 0.507642222 1 0.620106823 0.6793733  
0.705446357 0.837789525 0.528566952 0.720638564

YKL211C YKL211C::TRP3::anthranilate synthase Component II and indole-3-phosphate (multifunctional enzyme) 1 1.109499775 0.999198618 1.015398113  
0.820294511 1 1.049544898 1.116951613 0.840514318 0.921878675 1  
1.654432375 1.385564677 0.651065176 0.880438792 1 1.801905936  
1.402827126 0.945092519 0.799429776 1 1.26707358 0.948216747  
0.572899757 0.790628392 1 1.045222855 1.381528724 1.452529159  
1.388228563 1 1.152410801 0.796558053 1.117067231 0.94465402  
0.472847882 1 0.990369664 0.671607824 0.982431457 0.602317268  
0.485783323 0.706628552

YMR279C YMR279C::YMR279C::not yet annotated 1 1.117927853 0.946391584  
1.297560691 1 1.252129889 1.291015269 0.871804028 1  
1.147221532 1.129094861 0.602251073 1.323735107 1 1.476809407  
0.94499574 0.488134752 1 1 0.749391177  
0.626080686 0.952417311 0.927325995 0.837126315 1 1.724674301  
0.739039593 1.44805405 1.397262513 0.525395626 1 1.357107452  
1.171161657 1.164051519 0.950949213 0.638562534 0.711006668

YKL213C YKL213C::DOA1::Required for normal intracellular ubiquitin metabolism and for normal rates of proteolysis of ubiquitin-dependent proteolytic substrates in vivo 1 1.083081598 0.985454292 1.327404803  
1.163347937 1 1.385362236 1.195280169 0.971247649 0.965836676 1  
1.180024063 0.903948047 1.310397674 1 1.374298286 1.162903047  
1.320144171 1 1.0370439 1.109006075 0.90656639 1.106584265 1  
1.181840393 1.177835435 0.987858493 1.225242087 1 1.108771594

|         |                                                                                                                               |             |             |             |             |             |             |
|---------|-------------------------------------------------------------------------------------------------------------------------------|-------------|-------------|-------------|-------------|-------------|-------------|
|         | 0.893083226                                                                                                                   | 0.828647425 | 0.831295538 | 0.338130954 | 1           | 0.949721322 |             |
|         | 0.936369717                                                                                                                   | 0.83372443  | 0.664984286 |             |             |             |             |
| YMR295C | YMR295C::YMR295C::molecular_function unknown                                                                                  |             |             |             |             | 1           | 1.387480063 |
|         | 1.44929993                                                                                                                    | 1.096981449 | 2.018593107 | 1           | 1.124206753 | 1.048740395 |             |
|         | 1.465215815                                                                                                                   | 1.576828163 | 1           | 1.049804587 | 1.097429845 | 1.441116274 |             |
|         | 1.463188428                                                                                                                   | 1           | 1.151761732 | 0.819315257 | 0.857713    | 1.258317604 |             |
|         | 1.397688177                                                                                                                   | 1.47379841  | 1.344593941 | 1.118369613 | 1           | 0.905770366 |             |
|         | 0.787219685                                                                                                                   | 0.686493598 | 0.829261139 | 0.742001324 | 1           | 1.006231455 |             |
|         | 1.020720268                                                                                                                   | 1.055811857 | 0.940103834 | 1.039121698 | 1           | 1.090436008 |             |
|         | 1.091496958                                                                                                                   | 1.140101264 | 1.262171725 | 1.61059896  | 1.026231372 |             |             |
| YKR002W | YKR002W::PAP1::poly(A) polymerase                                                                                             |             |             |             |             | 1           | 0.936724199 |
|         | 2.097871012                                                                                                                   | 0.604206669 | 1           | 1.590490755 | 1.191044572 | 1.740579586 |             |
|         | 1.911776148                                                                                                                   | 1           | 0.812567649 | 1.339618344 | 1.270905889 | 1.662651387 |             |
|         | 0.508352883                                                                                                                   | 1.542827934 | 1.66945432  | 0.254926055 | 1           | 0.618366225 |             |
|         | 0.233240124                                                                                                                   | 0.138252701 | 0.274027254 | 1           | 1.22751201  | 1.522938196 |             |
|         | 1.656160517                                                                                                                   | 2.462443309 | 2.048894867 | 1           | 0.945893989 | 0.407122399 |             |
|         | 0.721743763                                                                                                                   | 0.897607768 | 0.289919309 | 1           | 0.509767562 | 0.368819112 |             |
|         | 0.600334366                                                                                                                   | 0.306227459 | 0.560253214 | 0.285453428 |             |             |             |
| YMR297W | "YMR297W::PRC1::dispensable for haploidization and sporulation, but required for full protein degradation during sporulation" |             |             |             |             | 1           | 1.169819765 |
|         | 0.901639102                                                                                                                   | 1.401681242 | 0.940432127 | 1           | 1.295670533 | 1.433431209 |             |
|         | 1.103229375                                                                                                                   | 1.365192932 | 1           | 1.306125956 | 1.3608218   | 1.438672857 |             |
|         | 1.408093424                                                                                                                   | 1           | 1.254175837 | 1.369474902 | 1.845288677 | 1.189387376 |             |
|         | 0.976077257                                                                                                                   | 0.6348734   | 0.766100905 | 0.877912123 | 1           | 1.092227785 |             |
|         | 1.024100632                                                                                                                   | 1.756176802 | 1.431531499 | 1.059845684 | 1           | 1.096670082 |             |
|         | 0.628596101                                                                                                                   | 1.660174938 | 1.349819615 | 0.304254153 | 1           | 0.879810166 |             |
|         | 0.618440242                                                                                                                   | 1.091893897 | 0.560552572 | 1.214277759 | 0.985952665 |             |             |
| YKR004C | YKR004C::ECM9::ExtraCellular Mutant                                                                                           |             |             |             |             | 1           | 1.060408031 |
|         | 0.828348598                                                                                                                   | 1.378246945 | 1           | 0.980398673 | 0.826504417 | 0.955846605 |             |
|         | 1.070682001                                                                                                                   | 1           | 0.865066114 | 0.934546621 | 1.143678265 | 0.93152385  |             |
|         | 1.105406383                                                                                                                   | 0.860425587 | 1.155825122 | 0.998691804 | 1           | 1.077682478 |             |
|         | 2.005767123                                                                                                                   | 1.386628925 | 0.815553583 | 1           | 1.133205789 | 1.065630582 |             |
|         | 0.653537703                                                                                                                   | 0.930932904 | 1.038673019 | 1           | 0.964094875 | 1.127864612 |             |
|         | 0.92154596                                                                                                                    | 0.775875839 | 1.507886203 | 1           | 0.914790666 | 1.181306122 |             |
|         | 1.048311571                                                                                                                   | 1.63240283  | 1.651075603 | 2.477140293 |             |             |             |
| YMR299C | YMR299C::YMR299C::molecular_function unknown                                                                                  |             |             |             |             | 1           | 0.914730119 |
|         | 1.075096736                                                                                                                   | 0.905268414 | 1.399151353 | 1           | 0.922707975 | 1.299054606 |             |
|         | 1.271138267                                                                                                                   | 1           | 0.833522284 | 0.980359034 | 1.089006571 | 1.099355581 |             |
|         | 0.867470079                                                                                                                   | 0.765091459 | 0.833379801 | 1.137470506 | 1           | 0.873303171 |             |
|         | 1.666257552                                                                                                                   | 1.517827392 | 1.334229637 | 1           | 0.831877523 |             |             |
|         | 1.043252577                                                                                                                   | 1           | 1.075102074 | 1.320000836 | 1.08283408  | 1           |             |
|         | 1.094758                                                                                                                      | 0.850878553 | 1.253348671 | 0.957780534 | 1.930709742 | 1.003465128 |             |
| YKR006C | YKR006C::MRPL13::mitochondrial ribosomal protein YmL13                                                                        |             |             |             |             | 1           |             |
|         | 0.834958396                                                                                                                   | 1.026560489 | 1.041141937 | 1.474123383 | 1           | 0.859463395 |             |
|         | 1.149878189                                                                                                                   | 1.228302796 | 1.212080142 | 1           | 0.827441182 | 0.902530818 |             |
|         | 1.143152479                                                                                                                   | 0.862429936 | 1           | 0.823912432 | 1.229054796 | 1.124245807 |             |
|         | 1.054140734                                                                                                                   | 1           | 1.073205082 | 1.622227984 | 1.688543956 | 0.755599323 |             |
|         | 1.499266556                                                                                                                   | 1.58812065  | 0.994186768 | 1.032466999 | 1.41059434  | 1           |             |
|         | 1.488109411                                                                                                                   | 1.561866955 | 1.108494321 | 0.763839557 | 1.051050702 | 1           |             |
|         | 1.295569711                                                                                                                   | 1.216220667 | 0.893290914 | 1.315765245 | 1.305533039 | 1.839686086 |             |
| YKR008W | "YKR008W::RSC4::RSC4 is a member of RSC complex, which remodels the structure of chromatin."                                  |             |             |             |             | 1           | 0.688773965 |
|         | 0.961988758                                                                                                                   | 1           | 0.896084812 | 0.841293415 | 0.79716287  | 0.728969988 |             |
|         | 0.732904172                                                                                                                   | 0.79194101  | 0.586948086 | 0.82873653  | 1           | 0.777999787 |             |
|         | 0.481842666                                                                                                                   | 0.603282824 | 0.684613205 | 1           | 0.818955783 | 1.092380668 |             |
|         | 1.033995801                                                                                                                   | 0.386711606 | 1           | 1.010486066 | 1.032315888 | 0.930511173 |             |
|         | 0.866820523                                                                                                                   | 1.280642333 | 1           | 0.755118329 | 0.868398335 | 0.786740202 |             |

|         |                                                                       |             |             |             |             |             |             |
|---------|-----------------------------------------------------------------------|-------------|-------------|-------------|-------------|-------------|-------------|
|         | 0.679701533                                                           | 0.465483709 | 1           | 0.814633507 | 0.77767089  | 1.245898885 |             |
|         | 0.797263726                                                           | 0.853681088 | 0.605931783 |             |             |             |             |
| YKR010C | YKR010C::TOF2::topoisomerase I interacting factor 2                   |             |             |             |             | 1           |             |
|         | 0.92172056                                                            | 0.86662971  | 0.831475805 | 0.910988464 | 1           | 0.915343676 |             |
|         | 1.023017897                                                           | 0.773758479 | 0.811702745 | 1           | 0.833705128 | 0.787414482 |             |
|         | 0.755877499                                                           | 0.841365674 | 1           | 0.734291949 | 0.521798542 | 0.628014067 |             |
|         | 0.534365412                                                           | 1           | 0.58245071  | 0.624516007 | 0.633406593 | 0.388748022 |             |
|         | 1.196726839                                                           | 0.973268952 |             | 1.391635348 | 1.105934419 | 1           |             |
|         | 0.531143904                                                           | 0.618078656 | 0.473614495 | 0.354876759 | 1           | 0.717047914 |             |
|         | 0.748113014                                                           | 0.861875545 | 0.766000641 | 0.858354661 |             |             |             |
| YKR012C | YKR012C::YKR012C::molecular_function unknown                          |             |             |             |             | 1           | 0.795591301 |
|         | 0.662061741                                                           | 0.955265151 | 0.641013644 | 1           | 0.849242503 | 0.888092842 |             |
|         | 0.61806225                                                            | 0.914044617 | 1           | 0.77172415  | 0.644151037 | 0.518854375 |             |
|         | 1.315034993                                                           | 1           | 0.448467328 | 0.177548933 | 0.269173652 | 0.758666358 |             |
|         | 0.597312542                                                           | 0.531353256 | 0.434573834 | 1.018089339 | 1           | 1.146375263 |             |
|         | 0.937310705                                                           | 1.268347647 | 0.947805774 | 0.848180125 | 1           | 0.845050083 |             |
|         | 0.673711072                                                           | 0.780124789 | 0.687204316 | 0.480773677 | 1           | 0.608893962 |             |
|         | 0.645267872                                                           | 0.925248128 | 0.645084366 | 0.445500579 | 0.624319912 |             |             |
| YMR301C | YMR301C::ATM1::mitochondrial ABC transporter protein                  |             |             |             |             | 1           |             |
|         | 0.823288552                                                           | 0.722905051 | 0.761044855 | 0.538577201 | 1           | 0.824913024 |             |
|         | 0.839783088                                                           | 0.628939413 | 0.634455966 | 1           | 1.040831949 | 0.825104639 |             |
|         | 0.478865771                                                           | 0.787167394 | 1           | 0.786032888 | 0.615872889 | 0.675743351 |             |
|         | 0.770744993                                                           | 1           | 0.544052172 | 0.583326133 | 0.520626617 | 0.475494478 |             |
|         | 0.933744363                                                           | 0.761542965 | 1.027207389 | 1.122740204 | 0.8738954   | 1           |             |
|         | 1.06802654                                                            | 0.758756656 | 0.974534221 | 1.359192669 | 0.7033893   | 1           |             |
|         | 0.853589603                                                           | 0.771402992 | 0.952183302 | 0.735808188 | 0.64624457  | 0.894887689 |             |
| YMR303C | YMR303C::ADH2::alcohol dehydrogenase II                               |             |             |             |             | 1           | 1.293698495 |
|         | 0.916349433                                                           | 0.729226931 | 0.353493355 | 1           | 1.16385159  | 1.168520526 |             |
|         | 0.582201273                                                           | 0.574488216 | 1           | 1.273427767 | 1.296063604 | 1.260193993 |             |
|         | 0.578085364                                                           | 1           | 1.435475164 | 1.529190453 | 2.804845291 | 1.776467001 |             |
|         | 1.310754789                                                           | 0.875451374 | 0.69704731  | 1.539132535 | 1           | 0.868000353 |             |
|         | 0.826145056                                                           | 1.420687081 | 1.224256447 | 1.141361564 | 1           | 1.070775018 |             |
|         | 0.698167998                                                           | 0.966639828 | 0.978380985 | 0.324729417 | 1           | 0.856731315 |             |
|         | 0.540205677                                                           | 1.128073835 | 0.533257979 | 0.850865748 | 0.745156034 |             |             |
| YMR305C | YMR305C::SCW10::Soluble Cell Wall protein                             |             |             |             |             | 1           | 1.167057193 |
|         | 0.743359412                                                           | 0.995529394 | 0.729242636 | 1           | 0.935664135 | 0.820051886 |             |
|         | 0.778612436                                                           | 0.894675386 | 1           | 0.884833771 | 0.551800195 | 0.431779384 |             |
|         | 1.067811816                                                           | 1           | 0.754548222 | 0.400678875 | 0.340372342 | 0.723721219 |             |
|         | 0.475878783                                                           | 0.297776573 | 0.163711477 | 0.771382121 | 1           | 1.085075916 |             |
|         | 0.754756335                                                           | 0.972343553 | 1.211842282 | 0.73554034  | 1           | 0.647134824 |             |
|         | 0.539386174                                                           | 0.468304572 | 0.354302158 | 0.357416561 | 1           | 0.773873581 |             |
|         | 0.606816149                                                           | 0.795977113 | 0.730664226 | 0.688961359 | 0.823962171 |             |             |
| YKR026C | YKR026C::GCN3::34 KD alpha subunit of eIF2B                           |             |             |             |             | 1           | 0.952897324 |
|         | 0.938346256                                                           | 0.849737164 | 0.885371719 | 1           | 0.828681693 | 0.91674691  |             |
|         | 0.967775079                                                           | 0.887707294 | 1           | 0.680735393 | 0.640620665 | 0.607060645 |             |
|         | 0.837986892                                                           | 1           | 0.702940775 | 0.414986949 | 0.487426502 | 0.82792876  |             |
|         | 0.549045525                                                           |             | 0.808827715 | 1           | 0.948437878 | 0.92982378  |             |
|         | 0.931639996                                                           | 0.956728057 | 1           | 1.111158655 | 1.144947149 | 0.644926096 |             |
|         | 0.797973576                                                           | 1.032056706 | 1           | 0.97455248  | 0.987202639 | 0.772338986 |             |
|         | 1.07215216                                                            | 0.941238131 | 1.12430125  |             |             |             |             |
| YMR319C | YMR319C::FET4::Putative transmembrane low-affinity Fe(II) transporter |             |             |             |             | 1           | 1.292937668 |
|         | 1.053342051                                                           | 1.03001175  | 1.174001707 | 1.241422825 | 1           | 1.571213334 |             |
|         | 0.981244305                                                           | 1.996672635 | 1           | 1.198712778 | 0.673240478 | 0.437268408 |             |
|         | 0.733716807                                                           | 1           | 2.390510027 | 1.265857953 |             | 0.814471795 |             |
|         | 2.056788823                                                           | 2.212696982 | 1.982967617 | 1.68250276  | 2.124407821 | 1           |             |

2.932172631 2.490483307 2.448915098 1.17795619 0.640881223 1  
 2.647156881 2.093509539 1.169908423 0.991415362 0.816097618 1.649675567  
 YMR321C YMR321C::YMR321C::molecular\_function unknown 1 1.103447706  
 1.331129152 0.988194004 1.433088482 1 0.933450143 0.895846221  
 1.34015072 1.287000183 1 1.161154371 1.271731422 0.905289397  
 0.991411664 1 1.018272627 0.763292927 0.690690138 0.729460004 1  
 1.726639319 2.539394925 1.437522987 0.806193746 1 0.949307008  
 1.037390898 0.641493626 0.631634193 0.778675254 1 1.134689416  
 1.605492644 0.960714607 0.801506667 1.382386014 1 1.100746507  
 1.78218676 1.113973357 2.008380674 1.314557592 1.169833634  
 YKR028W YKR028W::SAP190::190 kDa protein that associates with the SIT4  
 phosphatase in a cell cycle dependent manner 1 0.945644031 0.878872436  
 1.042172703 0.933438595 1 0.98514923 0.931613968 1.015131569  
 0.918097357 1 0.849528066 0.847830669 0.688353498 0.938932528  
 0.927923832 1.152753591 0.670289466 0.746787333 1 0.77945414  
 0.700128701 0.762362328 0.793385651 0.768858063 0.748496474  
 0.922424595 1 0.952882529 0.666858789 0.831114535 1  
 0.812190775 0.846122238 0.97505983 1.015644703 1.017581792 1.565615701  
 YMR323W YMR323W::YMR323W::phosphopyruvate hydratase 1 2.01346675  
 1.342673182 1.026435082 0.496041983 1 1.625307367 1.959965656  
 0.774540325 0.900951574 1 1.941101952 1.970926241 1.6212548  
 0.802058249 1 1.696007607 1.412973323 3.199357137 0.725793693 1  
 1.278468324 0.653378406 0.259633876  
 0.983128826 0.907114669 1 0.806269211 0.57918878 0.503137519  
 0.696866729 0.260405336 1 1.044258745 0.695143299 1.059865727  
 0.517222788 0.857671994 0.711006668  
 YKR030W YKR030W::MSG1::Multicopy suppressor of geal-6 1 1.463160991  
 1.350609065 0.92511993 1.365245526 1 1.186172133 1.009169923  
 1.156805749 1.022228339 1 1.165637602 1.139147207 1.143495738  
 0.894885021 1 1.241024906 1.090580037 0.871163503 1.178286249 1  
 1.023626634 0.80797168 0.720426869 0.417185366 1 1.203711348  
 1.292067561 1.031722878 1.122581947 1.195863319 1 1.213298577  
 1.511191578 0.840484316 1 1.243248766 1.15624447  
 0.946982907 1.618632072 1.024978209 2.047208964  
 YMR326C YMR326C::YMR326C::molecular\_function unknown 1 1.415847497  
 1.550041829 1.136026623 1 1.347081291 1.402868221  
 1.370014346 1 1.459575372 1.373951114 2.453548502 1.240602536 1  
 1.448709631 2.052166546 1.065299906 1 0.449931112 2.714717692  
 1.431998425 0.979011574 1 0.960507135 0.909700775  
 0.950003119 1 0.49242751 0.458837512 0.641439938 0.626225144  
 0.744793961 0.58348882  
 YKR032W YKR032W::YKR032W::molecular\_function unknown 1  
 0.153285897 1 1.081197671  
 0.847798508 0.822229587  
 0.774656265 0.823725912 0.859969606 1.188221762  
 YNL002C "YNL002C::RLP7::Significant sequence similarity to RPL7B, but  
 neither can functionally replace the other. Does not correspond to any ribosomal  
 component identified so far, based on its biochemical features" 1  
 0.952192265 0.777130232 0.800082111 1.302820679 1 0.722283447  
 0.666462259 1.057301553 1.267741933 1 0.560436014 0.353253109  
 0.343600097 0.980879312 1 0.333270985 0.202337266 0.14111291  
 0.543288831 1 0.667649179 0.360375464 0.284896179 0.857042464 1  
 0.75994901 0.541869192 0.490174739 0.704917192 0.859310947 1  
 0.79884867 0.851374576 0.567197167 0.864765958 1.489923115 1  
 0.746232418 0.793635567 0.845948259 1.432368615 0.60410927 1.059505073

YKR034W YKR034W::DAL80::Negative regulator of multiple nitrogen catabolic genes 1.001021031 1.184116631 0.948685707  
0.833091694 1.037728284 1 2.313965278  
3.718396701 0.303310401 1 1.016584699  
1.066074314 1.047510951 1.288444921 1.28957805 1 0.653788249  
0.653646198 0.660220968 1.440650724 1 0.913652231 0.889159362  
1.122631317 0.77704739 1.88865367 0.681235469  
YNL004W YNL004W::HRB1::an ORF of unknown function located in a centromeric region duplicated between chromosomes III and XIV 1 1.033089758  
1.17659296 1.124046436 1.215696186 1 1.059067337 0.970598292  
1.156051057 1.244181828 1 1.179710061 1.114044189 1.136921965  
1.092291989 1 0.873551557 0.606941556 0.676937292 0.941850632 1  
1.133573364 1.324662954 1.188764069 0.873193931 1 0.977907887  
0.983696308 0.775964046 0.810143935 1.02533171 1 1.123972293  
1.027658226 1.14945044 1.00662025 1.075096501 1 1.086189607  
0.896492603 1.019359368 0.980840644 1.159389214 1.281037964  
YKR036C YKR036C::CAF4::CCR4 associated factor 1 0.857341496  
0.905644174 1.030300061 0.987375055 1 0.948541955 0.941292459  
0.841358735 1 0.980667911 0.79601855 0.568613572 1.135815628 1  
0.848268513 0.564505184 0.451412686 0.841768687 1 0.832717556  
0.888792151 0.843022353 1 1.325392307 1.048908346 0.98100385  
1.386111338 1 1.184823195 0.995445456 0.939927781 1.002815992  
0.803841303 1 0.772785503 0.613027737 0.837622898 1.056896361  
0.617958573 0.83446968  
YNL018C YNL018C::YNL018C::molecular\_function unknown 1 1.528400526  
1.553798071 1.467554371 1.8002924 1 1.490311627 1.214367672  
1.565569794 1 1.333846978 1.262751196 1.389888709 1.358958129  
0.635679054 1 0.738315321  
0.854132103 1 0.828297846 0.792560378  
1.019908838 1.021512112 0.918610753  
YLR165C YLR165C::PUS5 1 0.875905818 1.216486857 1.101351091  
1.337024173 1 1.055896941 1.025535811 1.303753925 1  
0.927752355 1.970311673 1.334819378 1 0.889875515 1.198823765  
1.281759867 1.873698652 1 2.139608185 2.40243182 2.658443908  
1.223170832 1 1.013053685 1.12484857 0.855206969 0.882509385  
1.058673087 1 0.721493359 0.985092447 1.258412163 1.069042737  
1.788201517 1 0.990913743 1.038987879 1.146986843 1.090207825  
1.45225484 1.163704293  
YLR167W YLR167W::RPS31::Homology to rat S27a 1 1.043889652  
1.313128323 0.777997348 1 0.948652238 0.817186317 1.513047265  
1.457768519 1 0.847809398 0.955560203 0.956054005 0.998166392 1  
0.672370512 0.287223774 0.160191203 0.529488095 1 1.595783209  
1.363806494 0.637627514 0.835889964 1 0.922219945 1.046758365  
0.631010914 0.952991898 1.109337824 1 1.612551156 2.384194359  
1.303654975 0.930583765 2.300723636 1 1.005227705 1.464485348  
0.943568527 2.049466944 1.351901699 1.478928945  
YLR169W YLR169W::YLR169W::molecular\_function unknown 1 1.798068226  
1.547672654 2.260811731 1 1.592590665 1.542764055 1.745339316 1  
1.34397241 1.346121859 1.52627537 1.396893688 0.626371848  
0.373999028 0.296950049 1 0.872765281 1.098025306  
0.703622865 1 0.981433088 1.047809169 1.227902441 1.095454214 1  
0.76807595 0.803972795 0.713358201 0.929378743 0.82405396 1  
0.845251246 0.8045235 0.974930525 1.154072396  
YLR171W YLR171W::YLR171W::molecular\_function unknown 1 0.832918363  
1.111260594 1.138527481 1.400615316 1 0.97168376 1.051091862  
1.341324169 1.413471397 1 1.048581916 1.310096993 1.174717719  
1.400643931 1 0.840917127 0.416133969 1.221288982 1

1.782624507 2.239352726 2.396532883 1.149272746 1 1.125374638  
1.470339094 1.066543106 1.028236477 1.154917385 1 0.824875952  
1.018290711 1.140564175 0.974852592 1.207145661 1 1.13135365  
1.154325766 1.111427176 1.219260792 1.369404775 0.662847393  
YDR467C YDR467C::YDR467C::molecular\_function unknown 1  
1.245089983 2.02733449 1 0.98554738 0.889950602 1.418618175  
1.348413721 1 1.137634256 1.225619741 1.678981713 1.303137066 1  
1.239209792 3.814024459 0.997356736 1.395164572 1 1.008967622  
4.480540509 3.241387305 1.465650908 1 0.920453757 1.099841815  
0.88075877 0.772385899 0.969403423 1 1.154119308 1.683582331  
1.211510066 1.090184718 1.873442491 1 1.001614132 1.50803266  
1.026956804 1.416272154 1.155847159 1.068261305  
YDR469W YDR469W::SDC1::likely involved in chromatin remodeling<br>member of  
Set1p complex 1 1.28570387 1.15998651 1.119722951 1  
1.098886539 1.079734618 1.295547523 1 1.216036407 1.733434859  
1.667399892 0.308795244  
1 1.013898521 0.729088062 0.833752548 0.980574342 1  
1.15743062 1.584532439 1.168497264 1.060618439 1.263539285 1  
0.943785584 0.981539758 0.869047612 1.121047703  
YDR471W YDR471W::RPL27B::Homology to mammalian L27 1 0.965761546  
1.025039746 0.740118666 1.354984243 1 0.851198206 0.774314968  
1.197671993 1.041756131 1 0.724221128 0.746659505 0.750019465  
0.893352693 1 0.796406217 0.252880794 0.638082203 1  
1.058507702 0.542513707 0.590582533 0.737904421 1 1.068709476  
0.890644723 0.725978745 0.872845784 0.914922892 1 0.96944561  
1.498617393 0.823853272 0.672527008 1.798436108 1 1.146418267  
1.214596872 0.833330285 1.654965296 1.115738402 1.352839042  
YDR473C YDR473C::PRP3::snRNP from U4/U6 and U5 snRNPs 1 0.561029459  
0.810514609 0.783661393 1 0.656486523 0.669713715  
0.826378616 1 0.80145243 0.869205141 0.872748034 1  
0.592342014 0.838681584 1.177232601 1 1.591757083 2.741534504  
2.370555259 1.542812305 1 0.983145942 1.089066863 0.822895886  
0.541639121 1.076757757 1 0.981809853 1.269895408 1.089252185  
1.386906334 1.842624771 1 1.324729646 1.45759541 1.389494416  
1.289590732 1.371542101 0.908022036  
YDR487C YDR487C::RIB3::Riboflavin biosynthesis 1 1.140597232  
1.077044742 1.045162887 1 0.876090458 0.852836467 1.015918293  
1.167808684 1 1.474373923 1.659634033 1.185830739 1.000843095 1  
1.685010886 0.835361482 1.154713983 1 2.014232242 1.485889676  
1.08829846 1.302061073 1 1.055420942 1.357876479 1.347832088  
1.109667255 1.020061919 1 1.285459756 2.109830698 1.694927689  
1.227567197 1.137983727 1 1.38246599 1.652322648 1.309240485  
1.372344736 0.899767927 1.062131964  
YDR489W YDR489W::YDR489W::molecular\_function unknown 1 1.066689359  
1.0363461 1.037399842 1 0.981422415 1.0079481  
1.051736473 1 1.26968879 1.091960127 1.336612258 1.117633924 1  
0.612176679 0.751179745 1.060310227 1 0.993547337 2.078746191  
1.542437402 1.283003223 1 1.158936274 1.011208538 1.100234448  
1.023953871 1.039247319 1 0.921398132 1.06823819 1.110963976  
1.139909566 1.039917397 1 1.066792008 1.001840759 1.058911371  
1.072513357 0.946886951 1.078768762  
YDR491C YDR491C::YDR491C::molecular\_function unknown 1.04043755  
0.961605576 1.118961574 0.922574765 0.862229899 1.025913539  
0.96209431 0.49196629 1.119963468 1 0.243138607  
0.203102602 0.240357947 1 0.681097209 0.557067954 0.890440596 1  
0.570063256 0.757975001 0.587946375 0.951181915 0.745055934 1

0.686106833 0.680747162 0.683340392 1.201744858 1.08590815 1  
 0.455829448 0.655722488 0.791812325 0.997175071 0.42752988 0.701374823  
 YDR493W YDR493W::YDR493W::molecular\_function unknown  
 0.912193217 0.745803377 1.150288528 0.613839131 0.706259633  
 1.314380139 1.153533199 0.665508847 0.81655754 1.308793926  
 0.815497841 1 1.086017719 0.671529177 1.08136169 1.242921685 1  
 1.959589783 2.355395072 2.697635528 1.415174528 1 1.209189877  
 1.349735847 1.150488083 1.183381514 1 1.173958574 2.024066467  
 1.711690148 1.386279811 1.942725358 1 1.063126723 1.525222494  
 0.984265662 1.016008525 1.620895784 0.950927634  
 YDR003W YDR003W::YDR003W::molecular\_function unknown 0.875445088  
 1.022658566 0.95266039 0.965263435 0.840245239 0.95010044  
 1.131532883 0.95652809 1.391299381 1.346473743 1.571721303  
 1.008358642 1 2.64608239 1.998298653 2.140968097 1.993124345 1  
 2.317738956 1.889953548 1.965570439 0.955548093 1 2.048285844  
 2.328530525 2.180511558 1.539026484 1.495314823 1 1.831131033  
 2.014610999 1.554958532 1.101215368 0.93612911 1 1.883277724  
 1.402774695 1.344628791 1.131827041 1.043949267 1.347585366  
 YDR495C YDR495C::VPS3::vacuolar sorting protein 0.856975727  
 0.871195754 0.98386384 0.740965522 0.649143785 0.992410037  
 0.778108354 0.663097614 0.932906425 0.988606854 0.832140673  
 0.79297003 0.558395207 1  
 0.932410205 0.764853204 0.815333063 0.825091316 0.900416537 1  
 1.405969189 1.229906188 1.067114749 1.677930157 1 0.804963218  
 1.021943631 0.863495855 0.741235396 1.084898103  
 YDR005C YDR005C::MAF1::Mod5 protein sorting. Negative effector of Pol III  
 synthesis. 1 0.851216914 0.783496795 0.913630084 1.069807538 1  
 0.847088383 0.880098644 0.988826764 0.893719383 1 0.868658887  
 0.790336665 0.963824964 1 1.377084722 0.873588795 1.564036722  
 1.347511089 1 1.360115954 2.132880171 1.845578699 1.620978144 1  
 1.164201397 1.348193218 0.887271335 0.976044504 1.265837398 1  
 1.258671333 1.472945697 1.337032886 0.990674951 1.447706328 1  
 1.214834703 1.173014117 0.955877302 1.261998237 1.24525569  
 YDR497C YDR497C::ITR1::member of sugar transporter superfamily 1  
 1.419414502 0.826765122 1.176697589 0.710717099 1 1.285526319  
 1.254713003 0.749850948 0.784159049 1 0.874009922 0.849765429  
 0.767681818 0.767057618 1 0.671795784 0.560989548 0.558135247  
 0.494191047 1 0.857376706 0.43447269 0.645160575 1.178893148 1  
 0.994240835 0.743320457 1.135899185 1.392538419 1.027362193 1  
 0.661311617 0.533011221 0.689684384 0.53486455 0.513342756 1  
 0.727156761 0.678452326 0.972487095 0.65990665 0.792149802 0.802947204  
 YDR019C YDR019C::GCV1::Required for metabolizing glycine as a nitrogen  
 source 1 1.80088046 1.665635293 1.692488391 1.431840134 1  
 1.556277358 1.33104757 1.476317826 1.464272133 1 1.848447692  
 1.775734142 1.070408961 1.06875674  
 0.786976891 1 0.991982717 0.864360213 0.920173774  
 0.927009621 1.379557099 0.697723695 0.878692775 1  
 1.233731453 1.191523708 1.132119909 0.937271796 1.357898229  
 YDR021w "YDR021w::FAL1::Similar to eukaryotic initiation factor eIF4a;  
 required for pre-rRNA processing at sites A0, A1, and A2; may be involved in 18S  
 rRNA maturation" 1 0.710040226 0.810010954 1.143889735 1  
 0.60946503 0.660519226 1.286895034 1 0.416763416 0.498742415  
 0.685971124 0.984061547 1 0.28330698 0.221008853 0.484273964  
 0.570992904 1 0.693986738 1.842351 0.740374482 0.882541577 1  
 0.697671036 0.642895426 0.67670589 1.132838538 1.098690831 1  
 0.784954519 1.420424797 0.88526041 1.869234087 2.415765062 1  
 0.747403593 0.79101569 1.189352366 0.653128128 1.017475036

YLR173W YLR173W::YLR173W::molecular\_function unknown 1 0.859763312  
0.90249903 1.136336508 0.620986017 1 1.161162397 1.178162281  
0.781391813 0.802624967 1 1.157289344 1.010856158 0.606568607  
0.896906595 1 0.430970104 0.572944675 1 0.929453708  
0.649845229 1 0.943355515 0.987187078 0.930050782  
1.092973853 1 0.96454557 0.596592615 0.80979397 1.068808496  
0.678423007 1 0.818923806 0.505622324 0.928294182 0.534570211  
1.091248754 0.802947204  
YDR023W YDR023W::SES1::seryl-tRNA synthetase 1 0.880205178  
0.745466011 0.921001618 0.904700375 1 0.935438079 0.872542095  
0.804107498 0.834916554 1 0.770027223 0.679096712 0.449964088  
0.780156154 1 1.347778915 0.938426384 0.747548222 0.878384184 1  
0.9961781 0.633677964 0.363899955 0.695910516 1 0.891239961  
0.799870428 0.823782752 0.933916905 1.088400903 1 0.996434664  
0.776457069 0.613889903 0.674403122 0.395720691 1 1.281180109  
0.690300127 0.94504665 0.727790419 0.728540606 1.019226366  
YLR175W YLR175W::CBF5::major low affinity 55 kDa Centromere/microtubule  
binding protein 1 1.008156297 0.641906683 0.957416585 0.789074959 1  
1.037655566 0.667612672 0.895954303 1 0.701674652 0.422479217  
0.337256208 0.851531459 1 0.931082172 0.514150355 0.377370054  
0.614446803 1 0.542115313 0.126453829 0.094437151 0.654647966 1  
0.839371123 0.568026377 0.760261341 0.968776342 0.828820364 1  
0.901528698 0.543841188 0.456862533 0.71327918 0.923288316 1  
0.86658404 0.568285239 0.891184958 1.082621116 0.718857423 0.830967177  
YDR025W "YDR025W::RPS11A::Homology to rat S11, human S11, and E. coli S17"  
1 1.150231039 1.116699236 0.72838999 0.963320181 1 0.993679179  
0.948671178 0.966747908 0.894449719 1 0.977063315 0.808104424  
0.741149522 0.726921987 1 1.171758991 0.480082966 0.311056444  
0.889245804 1 0.963063186 0.68277687 0.380485476 0.649521358 1  
1.203509282 0.774301167 0.905454544 1.130007968 1.124502355 1  
1.174767408 1.190190504 0.623442456 0.591143496 0.979920935 1  
1.133982088 0.900614013 1.001482562 1.433999579 0.689971234 1.277535408  
YLR189C YLR189C::UGT51::Udp-glycosyltransferase 1 1.395353535  
1.368779198 1.542066937 1.500735572 1 1.486808799 1.474072997  
1.292226607 1.256052487 1 1.278506958 1.78127494 1.085102995  
1.483284173 1 1.562489443 1.417448824 0.9594353 1  
0.8463844 1.333450067 0.42856705 1 0.919286889 1.019504885  
0.930170777 1 1.076632159 0.891496678 1.045083034 1.070649727  
0.788453806 1 1.102598186 1.047690007 1.073575438 0.862900016  
1.272274154 1.01222136  
YDR027c YDR027c::LUV1::Loss Upsets Vacuole. Isolated in a microtubule  
complex containing Rbl2p. 1 0.919857525 1.010366114 1.061186645  
0.974513655 1 1.023850191 0.994660253 1.107661884 0.911269511 1  
0.985750291 1.120370842 1.084192119 1.152409676 1 0.923060121  
1.794995659 1.487385931 0.927765895 1 0.879834434 0.603469202  
0.623152437 0.578128692 1 1.059246742 1.312211306 1.25673954  
1.279082058 1.328729257 1 1.209334322 0.899683892 0.981255175  
0.988955086 0.661853914 1 0.710916091 0.579460812 0.465620618  
0.582179052 0.630449305  
YLR191W "YLR191W::PEX13::Pas20p may be the component of peroxisomal protein  
import machinery that binds Pex5p, the mobile receptor for type I peroxisomal  
targeting sequence (PTS1)-containing proteins" 0.907458505 0.936108426  
1.100255694 0.997569463 1.093287381 1.070922476 1.006984787  
1.096537998 0.992235153 1.090506246 0.909144345 1.014232617 1  
1.670737538 1.241857741 1.201420475 1.193992195 1 1.233497505  
0.723771773 0.665112158 1.116264449 1 1.111006244 1.238793262  
1.217770725 1.028143225 1.03934224 1 0.953809569 1.048544564



|              |                                                                                                                                         |             |             |             |             |             |   |
|--------------|-----------------------------------------------------------------------------------------------------------------------------------------|-------------|-------------|-------------|-------------|-------------|---|
|              | 1.054592801                                                                                                                             | 0.999533914 | 1.130117073 | 1           | 0.945222563 | 0.940098161 |   |
|              | 1.051766974                                                                                                                             | 1.120873696 | 0.913537597 | 0.971942653 |             |             |   |
| YDR029w      | YDR029w::YDR029W::molecular_function unknown                                                                                            |             |             |             | 1           | 0.788558267 |   |
|              | 0.948980072                                                                                                                             | 1.133995207 | 0.906118302 | 1           | 1.059180437 | 1.21429786  |   |
|              | 1.009960475                                                                                                                             | 0.610571714 | 1           | 1.111463695 | 1.149819808 | 0.513304687 |   |
|              | 1.13922087                                                                                                                              | 1           | 0.600272128 | 0.550260289 | 0.729048345 | 0.781145557 | 1 |
|              | 1.025410633                                                                                                                             | 1.299443242 | 0.768213162 | 1           | 1.987684019 | 1.913095491 |   |
|              | 2.530285743                                                                                                                             | 2.206313963 | 2.454195749 | 1           | 0.567968318 | 1.183082791 |   |
|              | 0.940928606                                                                                                                             | 0.355825141 | 1.089688674 | 0.841707533 | 0.943635325 |             |   |
|              | 0.504067218                                                                                                                             | 0.922320312 |             |             |             |             |   |
| YLR193C      | YLR193C::YLR193C::molecular_function unknown                                                                                            |             |             |             | 1           | 0.920627743 |   |
|              | 1.132563122                                                                                                                             | 0.833713596 | 1.060900617 | 1           | 0.985611467 | 1.03425765  |   |
|              | 0.932971978                                                                                                                             | 0.999653533 | 1           | 1.34154103  | 1.055198225 | 1.358464734 |   |
|              | 0.83960076                                                                                                                              | 1           | 1.570098848 | 0.924784271 | 1.337251032 | 1.028691925 | 1 |
|              | 1.350847212                                                                                                                             | 1.054538973 | 1.311245758 | 1.19494818  | 1           | 1.062245196 |   |
|              | 0.919442957                                                                                                                             | 0.848200145 | 0.99535054  | 0.967339462 | 1           | 0.911380844 |   |
|              | 0.690534734                                                                                                                             | 0.829231263 | 1.086702009 | 1.39483296  | 1           | 0.699452821 |   |
|              | 0.519829775                                                                                                                             | 0.967617822 | 0.909451261 | 0.995049144 | 1.098032451 |             |   |
| YDR043C      | YDR043C::NRG1::involved in regulation of glucose repression                                                                             |             |             |             |             |             |   |
|              | 0.829887469                                                                                                                             | 0.842725331 | 0.790529241 | 1.113087718 | 0.759126425 |             |   |
|              | 0.78863827                                                                                                                              | 0.885086617 | 1.074235522 | 0.994646386 | 0.890597722 |             |   |
|              | 1.241017134                                                                                                                             | 1.202198536 | 1           | 1.503328182 | 1.313616963 | 1.617319341 | 1 |
|              | 2.032723159                                                                                                                             | 1.911389416 | 1.920600012 | 0.85594575  | 0.828360878 |             |   |
|              | 0.982036875                                                                                                                             | 0.686444944 | 0.790376248 | 1           | 2.463850393 | 1.956713603 |   |
|              | 1.531244828                                                                                                                             | 1.031180073 | 1.66187429  | 1           | 1.490244006 | 1.124631447 |   |
|              | 0.686199208                                                                                                                             | 0.672690658 |             |             |             |             |   |
| YLR195C      | YLR195C::NMT1::N-myristoyl transferase                                                                                                  |             |             |             | 1           | 0.742531135 |   |
|              | 0.764192133                                                                                                                             | 0.987263696 | 0.746822418 | 1           | 0.840240852 | 0.867012933 |   |
|              | 0.893793791                                                                                                                             | 0.939741163 | 1           | 0.771769196 | 0.785416723 | 0.608751286 |   |
|              | 1.065799607                                                                                                                             | 1           | 0.888603645 | 0.485954747 | 0.572341162 | 0.941807305 | 1 |
|              | 1.244511519                                                                                                                             | 0.796928291 | 0.585186794 | 1.177606164 | 1           | 0.910343106 |   |
|              | 0.950051179                                                                                                                             | 1.029163875 | 1.104156384 | 1.126809305 | 1           | 0.968286483 |   |
|              | 0.67997844                                                                                                                              | 0.876818632 | 0.953911574 | 0.745467124 | 1           | 1.01117038  |   |
|              | 0.725456994                                                                                                                             | 1.022963563 | 0.78657145  | 0.969545163 | 0.98245011  |             |   |
| YDR045C      | YDR045C::RPC11::TFIIS-like small Pol III subunit C11                                                                                    |             |             |             | 1           |             |   |
|              | 1.246796771                                                                                                                             | 1.502841846 | 1.046779243 | 2.045392289 | 1           | 0.933528349 |   |
|              | 0.816925404                                                                                                                             | 1.734045165 | 1.552228209 | 1           | 0.903274208 | 0.785237238 |   |
|              | 1.036571027                                                                                                                             | 1.303947522 | 1           | 0.673647991 | 0.661683144 | 0.667927588 |   |
|              | 1.093798319                                                                                                                             | 1           | 1.086593633 | 0.848826752 | 0.921454156 | 1           |   |
|              | 0.675368755                                                                                                                             | 0.744157551 | 0.587222977 | 0.698111124 | 0.971716659 | 1           |   |
|              | 1.822632935                                                                                                                             | 1.045370799 | 2.055823384 | 3.211472915 | 1           | 0.877935908 |   |
|              | 1.172220195                                                                                                                             | 0.694307947 | 1.587216344 | 0.724748936 |             |             |   |
| YLR197W      | YLR197W::SIK1::part of small (ribosomal) subunit (SSU) processosome (contains U3 snRNA); similar to microtubule binding proteins and to |             |             |             |             |             |   |
| X90565_5.cds | 1                                                                                                                                       | 1.043853797 | 0.660309989 | 1.001044219 | 1.137007151 | 1           |   |
|              | 1.03618954                                                                                                                              | 0.791404874 | 0.743315007 | 0.962695104 | 1           | 0.667717064 |   |
|              | 0.41991603                                                                                                                              | 0.255524373 | 0.896639656 | 1           | 0.677044006 | 0.311116028 |   |
|              | 0.167435078                                                                                                                             | 0.418099894 | 1           | 0.672323146 | 0.16634769  | 0.13896564  |   |
|              | 0.593530528                                                                                                                             | 1           | 0.909127865 | 0.754583747 | 0.757859209 | 1.096036114 |   |
|              | 0.827617377                                                                                                                             | 1           | 1.023283658 | 0.686294793 | 0.503576802 | 0.665154671 |   |
|              | 1.039717582                                                                                                                             | 1           | 0.85006729  | 0.644743532 | 0.890289033 | 1.261445336 |   |
|              | 0.707313164                                                                                                                             | 0.829215951 |             |             |             |             |   |
| YLR199C      | YLR199C::YLR199C::molecular_function unknown                                                                                            |             |             |             | 1           | 1.016162448 |   |
|              | 1.089697595                                                                                                                             | 0.969869993 | 1.399447203 | 1           | 1.04380239  | 0.894915763 |   |
|              | 1.238540151                                                                                                                             | 1.262535419 | 1           | 0.810967444 | 0.859556817 | 1.28422628  |   |
|              | 1.073824603                                                                                                                             | 1           | 0.832210438 | 0.552998696 | 1.090738234 | 1.312829974 | 1 |
|              | 0.962360317                                                                                                                             | 1.21671943  | 1.298187885 | 1.138862858 | 1           | 0.826581967 |   |

|             |                                                                                                                                                                                                                                                             |             |             |             |             |             |
|-------------|-------------------------------------------------------------------------------------------------------------------------------------------------------------------------------------------------------------------------------------------------------------|-------------|-------------|-------------|-------------|-------------|
| 0.922319498 | 0.760558636                                                                                                                                                                                                                                                 | 0.763832473 | 0.936259063 | 1           | 1.037777244 |             |
| 0.928575746 | 0.807205011                                                                                                                                                                                                                                                 | 0.772683114 | 0.964688636 | 1           | 0.889439642 |             |
| 0.919936048 | 0.904274797                                                                                                                                                                                                                                                 | 1.049819458 | 0.895515766 | 1.238132366 |             |             |
| YLR213C     | YLR213C::CRR1::CRH-Related                                                                                                                                                                                                                                  |             | 1           | 1.546644518 | 1.313577067 |             |
| 1.393761674 | 1                                                                                                                                                                                                                                                           | 1.464154744 |             | 1.318264634 | 1.614355138 | 1           |
| 1.605429515 |                                                                                                                                                                                                                                                             | 1.293198185 |             | 0.853466568 |             | 0.744526922 |
| 0.67114592  | 1                                                                                                                                                                                                                                                           | 0.989883164 |             |             | 1           | 0.980285752 |
| 1.010138894 | 0.935311079                                                                                                                                                                                                                                                 |             | 1           | 1.067845654 | 0.734689446 | 0.647544517 |
| 0.928879226 | 0.975028862                                                                                                                                                                                                                                                 | 1           |             | 1.038300424 | 0.721693406 | 1.051816019 |
| 0.967817306 | 0.955025026                                                                                                                                                                                                                                                 | 1.210112341 |             |             |             |             |
| YLR215C     | YLR215C::CDC123::Product of gene unknown                                                                                                                                                                                                                    |             | 1           |             | 0.874243549 |             |
| 0.939167845 | 0.925818219                                                                                                                                                                                                                                                 | 1.344851337 | 1           |             | 0.859646162 | 0.741126087 |
| 1.17888143  | 1.247206801                                                                                                                                                                                                                                                 | 1           | 0.86400327  | 0.942254325 | 1.026830693 |             |
| 1.282276014 | 1                                                                                                                                                                                                                                                           | 0.646615976 | 0.684527733 | 0.59210121  | 1.064211567 | 1           |
| 1.081650791 | 1.661177739                                                                                                                                                                                                                                                 | 1.414139858 | 1.088858334 | 1           |             | 0.859106    |
| 0.844367116 | 0.647141236                                                                                                                                                                                                                                                 | 0.707360579 | 0.740351871 | 1           |             | 0.969193626 |
| 1.188011725 | 0.883724095                                                                                                                                                                                                                                                 | 0.962861521 | 1.324300947 | 1           |             | 0.926044695 |
| 1.015764322 | 0.957146851                                                                                                                                                                                                                                                 | 1.130809453 |             | 1.379983402 |             |             |
| YDR511W     | YDR511W::ACN9                                                                                                                                                                                                                                               |             | 1           | 0.880813161 | 1.259164936 | 1.01883731  |
| 1.605377562 | 1                                                                                                                                                                                                                                                           | 0.803204513 | 0.918889481 | 1.459704876 | 1.351806528 | 1           |
| 1.124250305 | 1.393528967                                                                                                                                                                                                                                                 | 2.261877394 | 1.09287891  | 1           | 1.701618239 |             |
| 1.358534218 | 1.501920538                                                                                                                                                                                                                                                 | 1.586750591 | 1           | 2.348619697 | 3.775993915 |             |
| 3.357493337 | 1.759942956                                                                                                                                                                                                                                                 | 1           | 1.065002088 | 1.316883523 | 0.73030586  |             |
| 0.666592118 | 0.838111282                                                                                                                                                                                                                                                 | 1           | 1.097400778 | 1.830249227 | 1.592407031 |             |
| 1.500508232 | 2.038449284                                                                                                                                                                                                                                                 | 1           | 1.071381812 | 1.737734723 | 1.144403526 |             |
| 1.270949738 | 1.483171537                                                                                                                                                                                                                                                 | 1.47542639  |             |             |             |             |
| YDR513W     | YDR513W::TTR1::Glutaredoxin (thioltransferase) (glutathione reductase)                                                                                                                                                                                      |             | 1           | 1.093208946 | 1.678863141 | 1.139600858 |
| 1.292186118 | 1.420146797                                                                                                                                                                                                                                                 | 1.801355067 | 1.695956857 | 1           | 1.730530092 |             |
| 2.799701769 | 4.552125817                                                                                                                                                                                                                                                 | 1.23499395  | 1           | 4.112873899 | 3.200821805 |             |
| 3.973784344 | 3.81192632                                                                                                                                                                                                                                                  | 1           | 4.803384896 | 9.70081493  | 9.25268874  |             |
| 3.184449006 | 1                                                                                                                                                                                                                                                           | 1.280704729 | 1.91582887  | 1.319108699 | 0.566241769 |             |
| 0.788100076 | 1                                                                                                                                                                                                                                                           | 1.513706709 | 2.980009119 | 2.095324182 | 1.26200709  |             |
| 1.091312915 | 1                                                                                                                                                                                                                                                           | 2.102839447 | 2.41014656  | 1.294260536 | 0.778519852 |             |
| 1.62344693  | 1.821297853                                                                                                                                                                                                                                                 |             |             |             |             |             |
| YDR515W     | YDR515W::SLF1::Associates with translating ribosomes; may function in cytoplasm to modulate mRNA translation; regulates the copper-dependent mineralization of copper sulfide complexes on cell surface in cells cultured in medium containing copper salts |             | 1           | 0.507470067 | 0.745544327 |             |
| 0.83096503  | 1                                                                                                                                                                                                                                                           | 0.643334617 | 0.760226277 |             | 0.757126797 | 1           |
| 0.650482614 | 0.808459151                                                                                                                                                                                                                                                 | 0.763427143 | 0.742281673 |             | 0.900933083 |             |
| 1.090968747 | 1.445439248                                                                                                                                                                                                                                                 | 1           | 2.245156533 | 5.721738204 | 4.885454511 | 1           |
| 0.950783073 | 1.498386628                                                                                                                                                                                                                                                 | 0.98596046  | 0.746691628 | 1.027390319 | 1           |             |
| 1.500766234 | 2.263949423                                                                                                                                                                                                                                                 |             | 1.096346294 | 1.131702216 | 1           |             |
| 1.108309407 | 0.823849345                                                                                                                                                                                                                                                 | 0.836921968 | 1.038567807 | 0.894012128 |             |             |
| YDR517W     | YDR517W::GRH1::Yeast (GR)ASP65 (H)omologue                                                                                                                                                                                                                  |             | 1           |             | 0.908381946 |             |
| 0.912573696 | 0.804459782                                                                                                                                                                                                                                                 | 0.592624399 | 1           | 0.932233362 | 0.995932554 |             |
| 0.763001923 | 1                                                                                                                                                                                                                                                           | 1.13833433  | 1.289802757 | 1.096212491 | 0.888528458 | 1           |
| 1.494664363 |                                                                                                                                                                                                                                                             | 1.72782928  | 1.393225723 | 1           | 2.324147717 | 2.260357053 |
| 2.567059716 | 2.094301107                                                                                                                                                                                                                                                 | 1           | 1.064887435 | 1.267366333 | 1.810901181 |             |
| 1.510714467 | 1.222234241                                                                                                                                                                                                                                                 | 1           | 1.106907633 | 0.949733529 | 1.036943318 |             |
| 0.896047039 | 0.464336411                                                                                                                                                                                                                                                 | 1           | 0.790900235 | 0.76967507  | 0.84646789  |             |
| 0.672275849 | 0.607284147                                                                                                                                                                                                                                                 | 0.756539156 |             |             |             |             |
| YDR519W     | YDR519W::FPR2::binds the immunosuppressant drug FK506                                                                                                                                                                                                       |             | 1           |             |             |             |
| 1.447576946 | 1.286014744                                                                                                                                                                                                                                                 | 0.955651531 | 1.472744269 | 1           | 0.930208669 |             |
| 0.906193404 | 1.3442238                                                                                                                                                                                                                                                   | 1.304938326 | 1           | 1.223142409 | 1.188977084 |             |
| 1.465728752 | 1.342786509                                                                                                                                                                                                                                                 | 1           | 1.424541627 |             | 1.241461707 | 1.63046109  |
|             |                                                                                                                                                                                                                                                             |             |             |             |             | 1           |

|             |                                                               |             |             |             |             |
|-------------|---------------------------------------------------------------|-------------|-------------|-------------|-------------|
| 1.548495427 | 1.702421301                                                   | 1.881174148 | 1.238902404 | 1           | 1.121351345 |
| 1.097571868 | 1.248950773                                                   | 1.263644001 | 1.070702806 | 1           | 0.948095834 |
| 1.405164292 | 1.216776563                                                   | 1.017254386 | 1.312561619 | 1           | 0.968149381 |
| 1.333573437 | 0.803057905                                                   | 1.231997255 | 0.882243564 | 1.583128164 |             |
| YDR521W     | YDR521W::YDR521W::molecular_function                          | unknown     |             | 1           | 1.197316237 |
| 1.015013882 | 1.068995233                                                   | 1           | 0.955041475 |             | 0.858333976 |
| 1.093867953 | 1.299499185                                                   | 0.831974991 | 1.170380376 |             | 0.445354106 |
|             | 0.149013383                                                   |             | 1           | 0.799989992 |             |
| 0.845504093 | 1.175369876                                                   | 0.965414768 | 1           | 0.995261806 | 0.712433453 |
| 0.837227086 | 1.183757937                                                   | 1           | 0.835399038 | 0.823142331 |             |
| 0.499476696 | 1.01204534                                                    | 0.778429735 |             |             |             |
| YDR535C     | YDR535C::YDR535C::molecular_function                          | unknown     |             | 1           | 1.42074703  |
| 1.311413708 | 1.004974136                                                   | 1           | 1.340975506 | 1.984351577 |             |
| 1.167258765 | 1                                                             | 1.445562392 | 1.127928592 | 1.165884473 |             |
| 0.5816975   | 0.275578249                                                   | 0.717629297 | 0.51986301  | 1           | 0.893100763 |
|             | 1                                                             | 1.176328281 | 0.877530854 | 1.056246815 | 1.096901566 |
| 0.900211115 | 1.084369118                                                   |             | 1.194211814 | 0.936957953 | 1           |
| 1.245521971 | 1.206273166                                                   | 0.934539769 | 1.139280281 | 0.867743381 | 0.928821335 |
| YDR537C     | YDR537C::YDR537C::molecular_function                          | unknown     |             | 1           | 1.15782561  |
| 0.754938299 | 0.559758212                                                   | 1           | 0.827018647 | 0.825571353 |             |
| 0.708454484 | 1                                                             | 1.082169398 | 0.790741471 | 0.541884072 | 0.713726035 |
| 0.739067915 | 0.748634859                                                   | 0.568493734 | 0.699344778 | 1           | 1.144161452 |
| 1.244303862 | 0.850107011                                                   | 1.874928185 | 1           | 1.050497824 | 0.960485637 |
| 1.614438279 | 1.215768383                                                   | 1.011630778 | 1           | 0.803436531 | 0.542706849 |
| 0.589620387 | 0.533870041                                                   | 0.402119329 | 1           | 0.900670924 | 0.557914797 |
| 0.852608035 | 0.667603817                                                   | 0.808925612 | 1.031485049 |             |             |
| YDR047W     | YDR047W::HEM12::fifth enzyme in the heme biosynthetic pathway |             |             |             | 1           |
| 1.079109343 | 1.07449745                                                    | 1.099134998 | 0.951696262 | 1           | 1.039582664 |
| 1.137161357 | 1.252760412                                                   | 1.343913419 | 1           | 1.020928275 | 0.943693785 |
| 1.269795352 | 0.947850862                                                   | 1           | 1.155654626 | 0.880715527 | 0.830420047 |
| 0.994317877 | 1                                                             | 1.158403024 | 1.118850377 | 1.009074611 | 0.808315389 |
| 0.959741802 | 0.885378238                                                   | 1.252035926 | 0.977632968 | 0.944582541 | 1           |
| 1.233648143 | 0.981280216                                                   | 1.043003933 | 0.974233241 | 0.767728281 | 1           |
| 0.951966977 | 0.820996696                                                   | 0.709594581 | 0.86028131  | 0.637653094 | 0.968440097 |
| YDR539W     | YDR539W::YDR539W::molecular_function                          | unknown     |             | 1           | 1.00147023  |
| 0.881708693 | 0.863669189                                                   | 0.748151319 | 1           | 1.002372688 | 0.983308405 |
| 1.052361165 | 0.808240882                                                   | 1           | 0.984991172 | 0.99501877  | 0.811183343 |
| 1.022494392 | 1                                                             | 1.088739669 | 0.821777129 | 1.127666887 | 1.073307479 |
| 1.072643477 | 1.166451506                                                   | 0.738779132 | 0.997179836 | 1           | 1.019733274 |
| 1.170955068 | 1.293729444                                                   | 1.178413037 | 1.348715249 | 1           | 0.889994846 |
| 0.808473442 | 0.986112811                                                   | 1.293235823 | 0.748328993 | 1           | 0.860575709 |
| 0.828100764 | 1.106729543                                                   | 0.958689366 | 0.875811242 | 1.773138684 |             |
| YDR049W     | YDR049W::YDR049W::molecular_function                          | unknown     |             | 1           | 0.81332354  |
| 0.983090545 | 1.077596835                                                   | 0.923793655 | 1           | 0.957364709 | 0.912675044 |
| 0.977575776 | 1                                                             | 0.851154511 | 0.852084497 | 0.76678823  | 1.110285734 |
| 0.858120144 | 0.899320068                                                   | 0.874711603 | 1.010844785 | 1           | 1.111465016 |
| 1.285104148 | 1.129201738                                                   | 1.148936189 | 1           | 1.040509494 | 1.11283139  |
| 1.219074338 | 0.978076382                                                   | 1.265095418 | 1           | 1.099518079 | 1.063436548 |
| 0.930098424 | 1.133285227                                                   | 1.190819904 | 1           | 0.95218411  | 0.893652562 |
| 1.066724681 | 0.916269225                                                   | 1.042868171 |             |             |             |
| YDR541C     | YDR541C::YDR541C::molecular_function                          | unknown     |             | 1           | 1.15729478  |
| 0.920073551 | 0.927968951                                                   | 0.920139426 | 1           | 1.026595322 | 1.017000674 |
| 0.968464154 | 0.909354757                                                   | 1           | 1.250116092 | 1.155969873 | 1.083153036 |
| 1.068949777 | 1                                                             | 1.185748504 | 1.004888195 | 1.17174718  | 1.526070584 |
| 1.017811348 | 0.821546007                                                   | 1.044988719 | 1.426492715 | 1           | 1.204550501 |
| 1.21007952  | 1.09649046                                                    | 1.255794491 | 1.281081985 | 1           | 0.932907391 |

|         |                                                                 |             |             |             |             |             |             |
|---------|-----------------------------------------------------------------|-------------|-------------|-------------|-------------|-------------|-------------|
|         | 0.974162405                                                     | 1.220958676 | 1.434313011 | 0.901373953 | 1           | 1.008508366 |             |
|         | 0.930417749                                                     | 0.996005364 | 0.938813686 | 1.025686378 | 2.520921451 |             |             |
| YDR051c | YDR051c::YDR051C::molecular_function unknown                    |             |             |             |             | 1           | 0.648288613 |
|         | 0.890560038                                                     | 0.778879704 | 0.988306607 | 1           | 0.777555737 | 0.725022973 |             |
|         | 1.113309752                                                     | 0.950641515 | 1           | 0.652569819 | 0.879707653 | 0.90293347  |             |
|         | 0.849200813                                                     | 1           | 0.973044603 | 0.570119551 | 0.923715836 | 1.168443158 |             |
|         | 1.138400079                                                     | 1.863577601 | 1.786309378 | 0.64735711  | 1           | 0.952942485 |             |
|         | 1.176135575                                                     | 1.086030399 | 0.963773259 | 1.325072427 | 1           | 1.010982943 |             |
|         | 1.16372151                                                      | 0.733658455 | 1.441778127 | 1.587255374 | 1           | 0.933558136 |             |
|         | 0.782399137                                                     | 0.830478    |             | 1.01826099  |             |             |             |
| YDR053w | YDR053w::YDR053W::molecular_function unknown                    |             |             |             |             | 1           | 0.726102639 |
|         | 0.903114952                                                     | 1.049106603 | 0.882333613 | 1           | 0.987848219 | 1.004460531 |             |
|         | 0.866486951                                                     | 0.748115127 | 1           | 0.813905623 | 0.83321373  | 0.613004164 |             |
|         | 0.987475542                                                     | 1           |             |             | 0.922020259 |             |             |
|         | 0.696852864                                                     | 0.522697543 | 0.616668685 | 0.651660251 | 0.678688488 |             |             |
|         | 0.936777662                                                     | 1           | 1.109561482 | 1.047585977 | 0.896466144 | 0.874935901 |             |
|         | 0.773405095                                                     | 1           | 0.661172687 | 0.671541341 | 0.823402626 | 0.759880782 |             |
|         | 0.954030495                                                     |             |             |             |             |             |             |
| YLR217W | YLR217W::YLR217W::molecular_function unknown                    |             |             |             |             | 1           | 0.860627369 |
|         | 0.961427366                                                     | 1.352403723 | 1.06143633  | 1           | 1.025959616 | 1.329655194 |             |
|         | 0.924720827                                                     | 0.944292996 | 1           | 0.832542502 | 1.167972935 | 1.198119092 |             |
|         | 0.815158565                                                     | 1           | 1.329817658 | 1.238508915 | 1.607096853 | 1.885413844 |             |
|         | 1.150367883                                                     | 0.528095687 |             | 1.901598733 | 1           | 0.952385021 |             |
|         | 1.47976076                                                      | 0.756463438 | 0.96452917  | 1           | 1.526122128 | 1.382066892 |             |
|         | 0.847972009                                                     | 0.479249081 | 0.311835026 | 1           | 1.698261998 | 0.916674766 |             |
|         | 0.736059918                                                     | 0.521020874 | 0.811829739 | 0.83184279  |             |             |             |
| YDR067c | YDR067c::YDR067C::molecular_function unknown                    |             |             |             |             | 1           | 0.885063136 |
|         | 1.047040541                                                     | 0.983642115 | 1.298970114 | 1           | 0.91961808  | 0.904286657 |             |
|         | 1.733165948                                                     | 1.227199779 | 1           | 0.901891526 | 1.113926482 | 1.382057673 |             |
|         | 1.062722508                                                     | 1           | 1.053100836 | 0.999271617 | 1.35991686  | 1.603933819 |             |
|         | 1.026231876                                                     | 2.131832362 | 1.563847838 | 1.133258596 | 1           | 1.03097876  |             |
|         | 1.352256155                                                     | 0.781458917 | 0.951239045 | 1.060264751 | 1           | 1.02916028  |             |
|         | 1.370446449                                                     | 1.235093963 | 1.378254824 | 3.743546912 | 1           | 1.292587357 |             |
|         | 1.293357956                                                     | 1.265906094 | 1.524337536 | 2.12457911  | 1.619904421 |             |             |
| YLR219W | YLR219W::MSC3::Meiotic Sister-Chromatid recombination           |             |             |             |             | 1           |             |
|         | 1.193289812                                                     | 1.250000717 | 1.319014915 | 1.204347585 | 1           | 1.282592464 |             |
|         | 1.180857069                                                     | 0.972148749 | 1           | 1.24753021  | 1.523879098 | 1.220357325 |             |
|         | 1.269943599                                                     | 1           | 1.244941808 |             | 1.002335187 | 0.889068419 |             |
|         | 0.771172804                                                     | 0.984062692 |             | 1           | 1.289773562 | 1.165602976 |             |
|         | 1.210642268                                                     | 1.149518665 | 0.864366804 | 1           | 1.117395696 | 0.670592942 |             |
|         | 1.203801958                                                     | 0.932462695 | 0.511338472 | 1           | 0.95188091  | 0.802413909 |             |
|         | 1.108959009                                                     | 0.74222304  | 0.906315523 | 0.993833232 |             |             |             |
| YDR069C | YDR069C::DOA4::deubiquitinating enzyme; vacuole biogenesis gene |             |             |             |             | 1           |             |
|         | 0.690082556                                                     | 0.758029549 | 0.99339115  | 0.692949059 | 1           | 0.871237669 |             |
|         | 0.968232345                                                     | 0.754511564 | 0.621548719 | 1           | 1.107820915 | 1.018744888 |             |
|         | 0.479473568                                                     | 0.919886679 | 1           | 1.517125948 | 1.247917333 | 0.969972592 |             |
|         | 1.074628807                                                     | 1.152472788 |             | 0.909988582 | 1           | 1.182593275 |             |
|         | 1.352142647                                                     | 1.054282031 | 0.935970815 | 1           | 1.72773968  | 0.884639008 |             |
|         | 1.129695182                                                     | 1.194416419 | 0.813936676 | 1           | 1.638361125 | 0.969654891 |             |
|         | 1.057917354                                                     | 0.835145778 | 1.379023237 | 0.705752939 |             |             |             |
| YLR221C | YLR221C::RSA3::RiboSome Assembly                                |             |             |             |             | 1           | 0.727150386 |
|         | 0.691448908                                                     | 1.218334119 | 1           | 0.653241255 | 0.558664252 | 0.969908803 |             |
|         | 1.086088061                                                     | 1           | 0.505109616 | 0.425152169 | 0.42725383  | 0.964849499 |             |
|         | 0.348037454                                                     | 0.211057745 | 0.254548032 | 0.542045109 | 1           | 0.691127925 |             |
|         | 0.47783259                                                      | 0.41316107  | 0.413686381 | 1           | 0.916505791 | 0.793723786 |             |
|         | 0.540904359                                                     | 0.718721372 | 0.928420535 | 1           | 0.918068973 | 1.053674917 |             |

|         |                                                                                                                              |             |             |             |             |             |
|---------|------------------------------------------------------------------------------------------------------------------------------|-------------|-------------|-------------|-------------|-------------|
|         | 0.745105746                                                                                                                  | 1.241682034 | 2.126730153 | 1           | 0.768998845 | 0.937095919 |
|         | 1.58700175                                                                                                                   | 0.836972704 | 1.182967981 |             |             |             |
| YDR071c | YDR071c::YDR071C::molecular_function unknown                                                                                 |             |             |             | 1           | 0.601114857 |
|         | 0.975195914                                                                                                                  | 0.702684966 | 1.155791572 | 1           | 0.646259418 | 0.657532337 |
|         | 1.150869188                                                                                                                  | 0.923086383 | 1           | 0.623461652 | 0.986402362 | 1.126649758 |
|         | 0.844337172                                                                                                                  | 1           | 1.055170888 | 1.05870411  | 0.912283448 | 1.487540778 |
|         | 2.154834237                                                                                                                  | 2.500468706 | 2.179098872 | 1.636222448 | 1           | 0.862325921 |
|         | 1.203986383                                                                                                                  | 0.77707047  | 0.660394332 | 0.957797242 | 1           | 1.128907517 |
|         | 1.938502547                                                                                                                  | 1.221476333 | 1.341061839 | 2.462546068 | 1           | 1.357884558 |
|         | 1.758948799                                                                                                                  | 1.130374583 | 1.794505073 | 1.751140586 | 1.384361518 |             |
| YLR223C | YLR223C::IFH1::Interacts with fork head protein. Protein controlling pre-rRNA processing machinery in conjunction with Fhl1p |             |             |             | 1           | 1.240920058 |
|         | 1.286645645                                                                                                                  | 1.570182122 | 1.504110111 | 1           | 1.48744869  | 1.365375831 |
|         | 1.408462979                                                                                                                  | 1.56899634  | 1           | 1.232572459 | 1.497611433 | 1.116616834 |
|         | 1.514092748                                                                                                                  | 0.572390349 |             | 0.435741931 | 0.508860637 |             |
|         | 0.436562625                                                                                                                  |             | 1           | 0.614954451 | 0.69553508  |             |
|         | 0.71993783                                                                                                                   | 0.856711269 | 1           | 0.887953209 | 0.820835181 | 0.797754229 |
|         | 1.25254753                                                                                                                   | 1.367691513 | 1           | 0.828095797 | 1.020582894 | 1.392671208 |
|         | 1.457951972                                                                                                                  | 1.531897865 | 1.292420981 |             |             |             |
| YDR073W | YDR073W::SNF11::component of SWI/SNF global transcription activator complex                                                  |             |             |             | 1           | 1.416476763 |
|         | 1.066962804                                                                                                                  | 1.053400951 | 1.248632645 | 1.159369926 | 1           | 0.833363839 |
|         | 1.039085457                                                                                                                  | 1.307712331 | 1.074890591 | 1           | 1.213615939 | 1.024911462 |
|         | 0.835082029                                                                                                                  | 1.734030827 | 1           | 1.131421449 | 1.473425729 | 1.814533833 |
|         | 1.016517326                                                                                                                  | 1           | 1.036430905 | 1.120120841 | 0.901872148 | 0.979998679 |
|         | 1.060747104                                                                                                                  | 1           | 0.770262553 | 0.9091029   | 0.829675614 | 0.935698105 |
|         | 2.50055059                                                                                                                   | 1           | 1.002677676 | 1.074205068 | 0.887898865 | 1.352925488 |
|         | 1.587204122                                                                                                                  | 1.47805328  |             |             |             |             |
| YLR237W | YLR237W::THI7::Thiamine Metabolism                                                                                           |             |             |             | 1           | 1.226202811 |
|         | 1.082361519                                                                                                                  | 0.756622487 | 1           | 1.072781525 | 1.085496566 | 0.851693176 |
|         | 1.050759466                                                                                                                  | 1           | 1.062155907 | 0.69955271  | 0.724500222 | 1.290005599 |
|         | 0.677978828                                                                                                                  | 0.425101962 | 0.597199766 | 0.901567026 | 1           | 0.707915585 |
|         | 0.534572977                                                                                                                  | 0.694822515 | 1           | 0.997819796 | 0.61887777  | 1.037560317 |
|         | 1.491193801                                                                                                                  | 0.931821999 | 1           | 0.617311216 | 0.562219543 | 0.549166955 |
|         | 0.943342676                                                                                                                  | 0.608928624 | 1           | 0.61182792  | 0.540641035 | 0.788704262 |
|         | 0.762115762                                                                                                                  | 0.645956453 | 0.539384381 |             |             |             |
| YDR075W | YDR075W::PPH3::protein phosphatase type 2A                                                                                   |             |             |             | 1           | 0.811254558 |
|         | 0.942181208                                                                                                                  | 0.813635188 | 1.072427139 | 1           | 0.742178984 | 0.745970044 |
|         | 1.166318438                                                                                                                  | 1.15841328  | 1           | 0.584863786 | 0.561620873 | 0.597803555 |
|         | 0.862622083                                                                                                                  | 1           | 0.481884899 | 0.371865854 | 0.447358061 | 0.780692309 |
|         | 0.799318099                                                                                                                  | 1.035302389 | 0.838706363 | 0.501722175 | 1           | 0.698312939 |
|         | 0.50496082                                                                                                                   | 0.529776679 | 0.719457874 | 0.888789629 | 1           | 0.631891873 |
|         | 0.885604953                                                                                                                  | 0.647904595 | 1.116405851 | 1.092244184 | 1           | 0.871279153 |
|         | 1.104914859                                                                                                                  | 0.992507142 | 1.271999085 | 1.0550047   | 0.95530575  |             |
| YLR239C | YLR239C::LIP2::LIPoyl ligase 2                                                                                               |             |             |             | 1           | 0.833571881 |
|         | 1.094513269                                                                                                                  | 1.277703775 | 1           | 0.99433386  | 1.288493785 | 1.341090476 |
|         | 1.326971631                                                                                                                  | 1           | 0.976768296 | 1.126923991 | 1.225572389 | 1.090850963 |
|         | 1.003926435                                                                                                                  | 0.909023302 | 0.822776589 | 1.208371863 | 1           | 1.736377116 |
|         | 1.818902738                                                                                                                  | 1.369851267 | 0.961622667 | 1           | 0.943257806 | 1.184889696 |
|         | 0.894392707                                                                                                                  | 0.856336007 | 0.957560144 | 1           | 0.87100064  | 1.135232632 |
|         | 1.770081642                                                                                                                  | 1           | 0.905827176 | 1.011256468 | 0.964588547 | 1.483827592 |
|         | 1.031485049                                                                                                                  |             |             |             |             |             |
| YDR077W | YDR077W::SED1::putative cell surface glycoprotein                                                                            |             |             |             | 1           |             |
|         | 0.957687319                                                                                                                  | 0.93256723  | 0.800758757 | 0.455967533 | 1           | 1.230102866 |
|         | 1.395993619                                                                                                                  | 0.471920385 | 0.633670155 | 1           | 0.949661143 | 0.85407976  |
|         | 1.358908345                                                                                                                  | 0.561775414 | 1           | 1.080244023 | 1.054700059 | 1.661269112 |
|         | 1.613803413                                                                                                                  | 1           | 0.373065824 | 0.246759669 | 0.404713337 | 1.150509525 |

0.961906212 0.585243065 0.863584335 1.077066719 1.045166065 1  
 0.656843683 0.487681118 0.336566551 0.816765032 0.662384687 1  
 0.584313947 0.341995429 0.598843487 0.636686662 0.808848402 0.731146021  
 YLR241W YLR241W::YLR241W::not yet annotated 1 0.912789134 0.857401011  
 0.956297687 0.766147014 1 0.986503348 1.052738393 0.893647396  
 0.73338903 1 1.056002572 1.08623722 0.823845801 0.939923162 1  
 1.7905019 1.237170835 1.462869463 1.311160059 1 1.264945362  
 0.962344038 0.954397995 1 1.155122798 1.063374576  
 1.29608923 0.915227309 1 1.104208656 0.861244795 0.833308027  
 0.800091925 0.897455172 1 1.221186901 1.043999039 1.048203356  
 0.92056156 1.13111959 0.795942198  
 YLR243W YLR243W::YLR243W::molecular\_function unknown 1 0.912478705  
 1.113273728 0.959709169 1.18653303 1 0.877496184 0.984172715  
 1.441128773 1.324905651 1 0.797606143 0.762285999 0.931513249  
 1.044849042 1 0.628394021 0.483328271 0.764533522 0.711554833 1  
 1.505623069 0.99246063 1.204410291 1 0.855842941 0.816546024  
 0.674760931 0.789527443 0.889989569 1 0.927037664 0.938649442  
 1.128473666 1.493403002 1 0.914069308 0.915975813 1.072709721  
 1.269683307 0.986587702 1.025355707  
 YLR245C YLR245C::CDD1::Involved in cytidine and deoxycytidine metabolism  
 1.004730173 0.895110963 1.347365978 0.741079561 1.259157074  
 1.167580026 1.313055176 1.040781808 0.986206998 1.135988059  
 0.78293924 1.05339214 1 0.752498176 0.570417399 1  
 0.842963122 1.225515612 0.784923073 1 0.916680806 0.998623969  
 0.916530654 1.033631655 0.87954729 1 0.749851559 0.631951863  
 0.706714184 0.917723912 0.652551516 1 0.813479299 0.79711765  
 0.692424724 0.707812698 0.926448077 0.953554524  
 YLR247C YLR247C::YLR247C::helicase 1 1.135412625 1.130270294  
 1.265905709 0.897523256 1 1.261012703 1.326666112 0.922360752  
 0.784594328 1 1.650281822 1.706030253 0.784823692 1.154280159 1  
 1.127070636 1.03514311 1.078663318 1.270296826  
 1.009214491 0.859923003 1 0.989465654 1.128211899 1.054710353  
 0.963542266 1.071333637 1 0.954566721 0.716811131 0.758201133  
 0.982526626 0.889507329 1 0.984155442 1.079865225 1.124397019  
 0.989048489 2.226931327 0.762668497  
 YDR543C YDR543C::YDR543C::molecular\_function unknown 1 1.428271305  
 1.113919649 1.219753829 1 1 1.09742052  
 1.114343982 1.428873389 1.358723937 0.621873678  
 1.007733482 1.04557557 0.909293376  
 1.008337163 1.011413743 1 0.778216234 0.892465939 0.805614774  
 0.619270439 0.855973834 1.035392133 0.588849179 1.344658355  
 0.646210491  
 YDR545w YDR545w::YRF1-1::Y'-helicase protein 1 1 1.630838701  
 1.340177555 1.639163734 1.007486071 1 1.501971136 1.654585816  
 1.048429492 1.045905283 1 1.48815239 1.438764318 1.019126795  
 1.52495716 1 1  
 1.023153088 1 0.919952491 0.998661628 1.264884069 1.052945528 1  
 1.048300802 1.169547421 1.241820333 0.944051051 1.139182506 1  
 1.095599464 1.325558429 0.920801281 0.95228634 0.700848904  
 YDR545w YDR545w::YRF1-1::Y'-helicase protein 1  
 1 0.884605647 0.937060545  
 1.264594816 1.093028532 1.164343886 1 0.724197303 0.58753407  
 0.967252706 1.066753545 0.586722581 1 0.68668913 0.79763285  
 1.103341924 0.772905395 0.902683454 0.705752939  
 YEL014c YEL014c::YEL014C::molecular\_function unknown 1 1.01214414  
 1.283949898 0.770604816 1.243779883 1 0.80691765 0.829315123

|             |                                       |                                                                                                                  |             |             |             |             |
|-------------|---------------------------------------|------------------------------------------------------------------------------------------------------------------|-------------|-------------|-------------|-------------|
| 1.340391089 | 1.097285208                           | 1                                                                                                                | 0.781619486 | 0.841844745 | 1.225941501 |             |
| 0.899230151 | 0.366702098                           |                                                                                                                  |             |             |             |             |
| 1           | 0.81967821                            | 0.790520494                                                                                                      | 0.657922843 | 0.572808372 | 0.831346033 | 1           |
| 0.71378853  | 0.89840988                            | 0.737502956                                                                                                      |             | 1.793855826 | 1           | 0.672514068 |
| 0.962896684 | 1.234250071                           | 1.294620961                                                                                                      |             | 1.278411073 |             |             |
| YEL016c     | YEL016c::YEL016C::molecular_function  | unknown                                                                                                          | 1           | 1.151930771 |             |             |
| 1.014754033 | 1.167686952                           | 0.943701652                                                                                                      | 1           | 1.066859687 | 1.000442372 |             |
| 1.015248145 | 1.024419285                           | 1                                                                                                                | 1.089189225 | 1.020920013 | 0.720650997 |             |
| 1.425260607 | 1.367221787                           | 1.628864241                                                                                                      | 0.75743782  |             |             |             |
|             | 1.056694251                           | 1                                                                                                                | 1.051384724 | 0.975698758 | 1.074032166 | 1.08164796  |
| 1.038083107 | 1                                     | 0.865424676                                                                                                      | 0.830680307 | 0.970416295 | 0.877997584 |             |
| 1.167698939 | 1                                     | 0.810016026                                                                                                      | 0.795445236 | 0.995946871 | 0.801807827 |             |
| 1.201830319 | 0.688240476                           |                                                                                                                  |             |             |             |             |
| YEL017w     | YEL017w::YEL017W::molecular_function  | unknown                                                                                                          | 1           | 1.660588874 |             |             |
| 1.65389441  | 1.147139428                           | 1.695661782                                                                                                      | 1           | 1.208066788 | 1.112228361 |             |
| 1.269106475 | 1.326182087                           | 1                                                                                                                | 1.204766806 | 1.169700082 | 1.629628391 |             |
| 1.014519248 | 1                                     | 1.110796092                                                                                                      | 0.780867316 | 1.211119248 | 0.940074265 | 1           |
| 0.727562032 | 1.368285479                           | 0.708440901                                                                                                      | 0.686146095 | 1           | 0.85952066  |             |
| 0.961447512 | 1.073373408                           | 0.889329181                                                                                                      | 1           | 1.003995045 | 0.855895364 |             |
| 0.97517367  | 0.683117941                           | 1                                                                                                                | 1.027900809 | 0.997822957 | 0.978214669 |             |
| 0.92816139  |                                       |                                                                                                                  |             |             |             |             |
| YEL019c     | YEL019c::MMS21::Protein               | involved in DNA repair                                                                                           |             |             |             |             |
| 1.209833991 |                                       | 1.035172463                                                                                                      | 1.24666356  | 1.417728669 | 0.987503711 |             |
| 1.114003998 |                                       | 1.438134823                                                                                                      | 1           | 0.336933042 |             |             |
| 0.558327559 | 1                                     | 1.017399837                                                                                                      | 1.873691932 | 0.805825687 | 1           |             |
| 1.027532822 | 1.030367074                           | 0.808676882                                                                                                      | 0.841824738 | 1.02031154  |             |             |
| 0.861830002 |                                       | 1.13708573                                                                                                       | 1           | 0.829363528 | 0.978838568 |             |
| 1.195187307 |                                       | 0.939544512                                                                                                      |             |             |             |             |
| YEL021w     | YEL021w::URA3::orotidine-5'-phosphate | decarboxylase                                                                                                    | 1           |             |             |             |
| 1.412828934 | 1.758033575                           | 1.12950895                                                                                                       | 1.605089418 | 1           | 1.171288154 |             |
| 1.137994009 | 1.496312736                           | 1.128060327                                                                                                      | 1           | 1.049253941 | 1.375307307 |             |
| 1.159253927 | 0.954705392                           |                                                                                                                  |             | 1.010844785 |             |             |
|             | 1                                     | 1.051606288                                                                                                      | 1.063573777 | 0.591324598 | 0.779896687 |             |
| 1.086571401 |                                       |                                                                                                                  |             |             |             |             |
|             | 1.616401866                           |                                                                                                                  |             |             |             |             |
| YEL023c     | YEL023c::YEL023C::molecular_function  | unknown                                                                                                          | 1           | 1.493273087 |             |             |
| 1.653767561 | 1.301464107                           | 1.578912802                                                                                                      | 1           | 1.915760547 | 1           |             |
|             |                                       | 1                                                                                                                |             | 1.039797936 |             |             |
|             |                                       | 0.760079836                                                                                                      | 0.969182228 | 0.876477705 | 1.072653561 |             |
|             | 0.993093197                           | 0.682644179                                                                                                      | 0.852583387 | 1.176475676 | 0.845389364 |             |
| 0.90401308  |                                       | 1.187016795                                                                                                      | 1.010470134 |             |             |             |
| YDR091C     | YDR091C::RLI1::Strong protein         | homology (68% identical) to human RNase L Inhibitor (RLI). Required for vegetative growth and early sporulation. |             |             |             |             |
| 1           | 0.885879381                           | 0.527340202                                                                                                      | 0.924937611 | 0.675971969 | 1           | 0.92295639  |
| 0.847001204 | 0.567632758                           | 0.740791249                                                                                                      | 1           | 0.577268107 | 0.353178731 |             |
| 0.226016866 | 0.735812992                           | 1                                                                                                                | 0.351325972 | 0.174678438 | 0.314783301 |             |
| 0.535320857 | 1                                     | 0.261873546                                                                                                      | 0.312642477 | 0.201826705 | 0.279727602 | 1           |
| 0.574579151 | 0.28658383                            | 0.339806389                                                                                                      | 1.255965149 | 0.838743562 | 1           |             |
| 0.40921724  | 0.19673196                            | 0.10091051                                                                                                       | 0.303300845 | 0.413027303 | 1           |             |
| 0.512752806 | 0.252388666                           | 0.481883942                                                                                                      | 0.715370157 | 0.553494555 | 0.684737973 |             |
| YEL037c     | YEL037c::RAD23::ubiquitin-like        | protein                                                                                                          | 1           | 0.711892864 |             |             |
| 0.78555269  | 0.831300508                           | 0.430111739                                                                                                      | 1           | 0.877606853 | 0.963580116 |             |
| 0.724346974 | 0.705728179                           | 1                                                                                                                | 0.735881287 | 0.976344651 | 0.890526498 |             |
| 0.667597476 | 1                                     | 1.110483653                                                                                                      | 1.072302123 | 1.382171653 | 1.088859606 | 1           |
| 1.037087273 | 0.575736365                           | 0.881274443                                                                                                      | 0.960579594 | 1           | 1.039206239 |             |
| 1.135584426 | 1.061861704                           | 1.087089189                                                                                                      | 1.164585063 | 1           | 0.921354156 |             |

|         |                                                                                                                                                                                                                                                                |             |             |             |             |             |
|---------|----------------------------------------------------------------------------------------------------------------------------------------------------------------------------------------------------------------------------------------------------------------|-------------|-------------|-------------|-------------|-------------|
|         | 0.814162561                                                                                                                                                                                                                                                    | 0.626162844 | 0.835246558 | 0.53269225  | 1           | 0.668927848 |
|         | 0.693552273                                                                                                                                                                                                                                                    | 0.950190971 | 0.606319441 | 0.561230445 | 0.938668951 |             |
| YEL039c | YEL039c::CYC7::iso-2-cytochrome c                                                                                                                                                                                                                              | 1           | 1.574116976 | 2.185987357 |             |             |
|         | 1.481874021                                                                                                                                                                                                                                                    | 2.051653903 | 1           | 1.450243038 | 1.488624095 | 2.093776111 |
|         | 1.642075759                                                                                                                                                                                                                                                    | 1           | 0.81359942  | 1.619887566 | 3.033865772 | 1.040529015 |
|         | 2.692229043                                                                                                                                                                                                                                                    | 2.486400549 | 4.835357186 | 2.757053768 | 1           | 1.838063603 |
|         | 2.3146206                                                                                                                                                                                                                                                      | 4.664409345 | 0.886023471 |             |             |             |
|         | 1.139634537                                                                                                                                                                                                                                                    |             |             |             |             |             |
|         | 0.223516044                                                                                                                                                                                                                                                    | 1.146191829 |             |             |             |             |
| YDR093W | YDR093W::DNF2::Drs2 Neol Family                                                                                                                                                                                                                                | 1           | 1.139395114 | 1.056143219 |             |             |
|         | 1.163182347                                                                                                                                                                                                                                                    | 0.819299021 | 1           | 1.22132685  | 1.183948748 | 0.908119265 |
|         | 0.926064894                                                                                                                                                                                                                                                    | 1           | 1.232124178 | 1.115377475 | 0.768831538 | 1.018420424 |
|         | 1.05214326                                                                                                                                                                                                                                                     | 0.663940458 | 0.839759091 | 0.896335327 | 1           | 0.772308897 |
|         | 0.904865899                                                                                                                                                                                                                                                    | 0.672357369 | 0.605297211 | 1           | 1.002702033 | 0.85610559  |
|         | 1.090463274                                                                                                                                                                                                                                                    | 1.131536288 | 1.020174623 | 1           | 0.755643781 | 0.779474472 |
|         | 0.6657513                                                                                                                                                                                                                                                      | 0.775594531 | 0.686675193 | 1           | 0.763452105 | 0.961464598 |
|         | 1.021937234                                                                                                                                                                                                                                                    | 1.061049757 | 0.940298064 | 0.92816139  |             |             |
| YDR095C | YDR095C::YDR095C::molecular_function unknown                                                                                                                                                                                                                   | 1           | 1.339420788 |             |             |             |
|         | 1.694185014                                                                                                                                                                                                                                                    | 1.217987233 | 1.181511904 | 1           | 1.277900508 | 1.139945545 |
|         | 1.723767167                                                                                                                                                                                                                                                    | 1.440731075 | 1           | 1.506467338 | 1.458472851 | 2.18163944  |
|         | 1.218953783                                                                                                                                                                                                                                                    | 1           | 0.97901028  | 1.86484128  | 1           | 1.103062084 |
|         | 2.788383957                                                                                                                                                                                                                                                    | 1.639000185 | 0.566102152 | 1           | 0.884482386 | 0.785300854 |
|         | 0.923086496                                                                                                                                                                                                                                                    | 1.057028653 | 0.919604673 | 1           | 0.898666881 | 1.048115559 |
|         | 0.72775854                                                                                                                                                                                                                                                     | 1           | 0.857848106 | 1.024315827 | 1.028959249 |             |
|         | 1.255813875                                                                                                                                                                                                                                                    | 0.947425183 |             |             |             |             |
| YDR097C | "YDR097C::MSH6::Required for mismatch repair in mitosis & meiosis, low levels of postmeiotic segregation & high spore viability; forms complex with Msh2p to repair both single-base & insertion-deletion mispairs; redundant with Msh3p in repair of in-dels" | 1           | 0.94963475  | 0.877263295 | 1.238174875 |             |
|         | 0.900964402                                                                                                                                                                                                                                                    | 1           | 1.033545983 | 1.065778564 | 1.067286161 | 1           |
|         | 0.870686185                                                                                                                                                                                                                                                    | 0.635574514 | 0.425204747 | 1.51463003  |             | 1.179217135 |
|         | 1.045227227                                                                                                                                                                                                                                                    | 1           | 0.411254385 |             | 0.350717992 | 1           |
|         | 0.543209119                                                                                                                                                                                                                                                    | 0.718327656 | 0.728826525 | 0.794590377 | 1           | 0.849562052 |
|         | 0.801749417                                                                                                                                                                                                                                                    | 0.892540041 | 1.492691273 | 0.555612074 | 1           | 1.014447948 |
|         | 0.983874219                                                                                                                                                                                                                                                    | 1.340036877 | 0.801901688 | 0.785681933 | 0.609434286 |             |
| YLL040C | YLL040C::VPS13::vacuolar Protein Sorting                                                                                                                                                                                                                       | 1           | 1.157092804 |             |             |             |
|         | 1.207113817                                                                                                                                                                                                                                                    | 1.244187828 | 1.315113435 | 1           | 1.376912866 | 1.096877081 |
|         | 1                                                                                                                                                                                                                                                              | 1.035363721 | 1.121149126 |             |             |             |
|         |                                                                                                                                                                                                                                                                |             | 1           | 1.29798475  | 1.066791201 | 1.594648759 |
|         | 0.94998534                                                                                                                                                                                                                                                     | 0.774369132 | 1           | 1.50116843  | 0.978356802 | 0.577263832 |
|         | 0.347462868                                                                                                                                                                                                                                                    | 0.289021627 | 1           | 1.423005977 | 0.928220796 | 0.743458649 |
|         | 0.494082604                                                                                                                                                                                                                                                    | 0.80833457  | 0.917653933 |             |             |             |
| YDR099W | YDR099W::BMH2::Brain Modulosignalin Homolog                                                                                                                                                                                                                    | 1           | 0.957836851 |             |             |             |
|         | 1.051336396                                                                                                                                                                                                                                                    | 1.06520912  | 1.275784709 | 1           | 1.039978912 | 1.231376424 |
|         | 1.054432793                                                                                                                                                                                                                                                    | 1.22210296  | 1           | 0.925188177 | 1.145704645 | 1.531476705 |
|         | 1.042908256                                                                                                                                                                                                                                                    | 1           | 1.478100958 | 1.533867646 | 1.763983633 | 1.845205601 |
|         | 1.308558276                                                                                                                                                                                                                                                    | 1.333714383 | 1.806677412 | 1.568028451 | 1           | 0.918272513 |
|         | 1.051420692                                                                                                                                                                                                                                                    | 1.134074502 | 0.929835021 | 0.876194946 | 1           | 1.199762462 |
|         | 1.264425351                                                                                                                                                                                                                                                    | 1.079245732 | 0.897799207 | 1.14579296  | 1           | 1.218350594 |
|         | 1.25941629                                                                                                                                                                                                                                                     | 1.045709854 | 1.152784652 | 1.73188135  | 1.154948061 |             |
| YLL042C | YLL042C::APG10::Involved in autophagy; protein-conjugating enzyme involved in the Apg12p-Apg5p conjugation pathway                                                                                                                                             | 1           | 1.877149881 |             |             |             |
|         | 1.747536824                                                                                                                                                                                                                                                    | 1.323575861 | 2.119094194 | 1           | 1.481476353 | 1.276441471 |
|         | 1.812923538                                                                                                                                                                                                                                                    | 1.800371715 | 1           | 1.527355292 | 1.591433048 | 2.119572633 |
|         | 1.450193069                                                                                                                                                                                                                                                    | 1           | 1.124100461 | 0.827880267 | 1.2411612   | 1.326924162 |
|         | 1.14737922                                                                                                                                                                                                                                                     | 1.869676785 | 2.009534251 | 0.934984239 | 1           | 1.061792306 |
|         | 1.242284148                                                                                                                                                                                                                                                    | 0.86009992  | 1.21864626  | 0.834328485 | 1           | 1.203867899 |



|         |                                                                                |             |             |             |             |               |
|---------|--------------------------------------------------------------------------------|-------------|-------------|-------------|-------------|---------------|
|         | 1.311616458                                                                    | 0.812021282 | 0.847716162 | 1.141256263 | 1           | 1.5680497     |
|         | 1.280321154                                                                    | 0.954748297 | 1.457591181 | 1.358749207 | 1.127803701 |               |
| YDR101C | YDR101C::ARX1                                                                  | 1           | 0.776422772 | 0.565575563 | 0.796034343 |               |
|         | 0.578996201                                                                    | 1           | 0.721250007 | 0.624093167 | 0.701790541 | 0.707037378 1 |
|         | 0.417360634                                                                    | 0.294994979 | 0.266589089 | 0.766422188 | 1           | 0.214409438   |
|         | 0.160493488                                                                    | 0.38458552  | 1           | 0.317977268 | 0.201049536 | 0.132822248   |
|         | 0.502613022                                                                    | 1           | 0.70244729  | 0.439058114 | 0.621214924 | 0.897298628   |
|         | 0.775549505                                                                    | 1           | 0.668743991 | 0.455328527 | 0.306581832 | 0.698605123   |
|         | 0.925378531                                                                    | 1           | 0.534925092 | 0.49125317  | 0.724649392 | 0.843046818   |
|         | 0.417425208                                                                    | 0.769673503 |             |             |             |               |
| YLL044W | YLL044W::YLL044W::molecular_function                                           | unknown     | 1           | 1.236353856 |             |               |
|         | 1.068585113                                                                    | 1.055640556 | 1.248519885 | 1           | 1.194749753 | 0.968525375   |
|         | 1.027644326                                                                    | 1.198363787 | 1           | 0.92116408  | 0.878954182 | 0.531390394   |
|         | 1.012395191                                                                    | 1           | 0.538699287 | 0.324071577 | 0.154816254 | 0.380514427 1 |
|         | 0.766235412                                                                    | 0.210802306 | 0.147322462 | 0.634099561 | 1           | 0.85403671    |
|         | 0.670217585                                                                    | 0.850561292 | 0.885303803 | 0.87303437  | 1           | 1.209310243   |
|         | 0.959141219                                                                    | 0.608572504 | 0.533216719 | 0.699670084 | 1           | 0.781240297   |
|         | 0.519413523                                                                    | 0.55342234  | 0.551600039 | 0.541682547 | 0.689116088 |               |
| YDR115W | YDR115W::YDR115W::molecular_function                                           | unknown     | 1           | 0.91348164  |             |               |
|         | 1.322745983                                                                    | 1.064874639 | 1.462879999 | 1           | 0.971488912 | 1.144300278   |
|         | 1.566860839                                                                    | 1.463585756 | 1           | 0.973743497 | 1.136718539 | 1.855333299   |
|         | 1.113923436                                                                    | 1           | 1.244127211 | 0.989817333 | 1.018919043 | 2.115047502 1 |
|         | 1.733573453                                                                    | 2.439708525 | 1.866981335 | 1.520151574 | 1           | 1.064504448   |
|         | 1.099184808                                                                    | 0.9844459   | 0.827638691 | 0.915626541 | 1           | 1.171762913   |
|         | 1.453913678                                                                    | 1.097292208 | 0.927465048 | 1.322848153 | 1           | 1.238020045   |
|         | 1.256495562                                                                    | 1.109532543 | 1.275975938 | 1.544855076 | 1.430769567 |               |
| YLL046c | YLL046c::RNP1::ribonucleoprotein                                               | 1           | 1           | 2.123113812 |             |               |
|         | 1                                                                              | 2.057576948 | 1           | 1.780851017 | 2.687006524 |               |
|         | 2.214483927                                                                    | 0.74084994  |             |             | 0.436562625 |               |
|         | 1                                                                              | 1.001141174 | 0.952338844 | 0.697602779 |             | 1.00070062 1  |
|         | 1.165790486                                                                    |             | 1           | 1.08953658  | 1.054924388 |               |
|         | 0.906310363                                                                    | 1.071569198 | 1.084604169 | 1.34145592  |             |               |
| YDR117C | YDR117C::YDR117C::molecular_function                                           | unknown     | 1           | 0.687186537 |             |               |
|         | 0.82261608                                                                     | 0.78047763  | 0.757767531 | 1           | 0.821165552 | 0.802594313   |
|         | 0.884551496                                                                    | 0.731074147 | 1           | 0.630699507 | 0.805854187 | 0.557997401   |
|         | 0.89177211                                                                     | 1           | 0.726094753 |             | 1.013810188 | 1             |
|         | 1.349209363                                                                    | 1.165776188 | 1           | 0.94230377  | 0.98990148  | 0.881473871   |
|         | 0.788996433                                                                    | 0.865194822 | 1           | 1.094779315 | 1.162236237 | 0.865523015   |
|         | 0.801782029                                                                    | 1.031698296 | 1           | 1.071605038 | 1.113352218 | 1.07536192    |
|         | 1.119408794                                                                    | 1.134489008 | 0.830967177 |             |             |               |
| YLL048C | "YLL048C::YBT1::Yeast bile transporter, similar to mammalian bile transporter" | 1           | 1.290523312 | 1.020305385 | 0.818868556 | 1.100554103 1 |
|         | 1.10200483                                                                     | 0.963184067 | 0.907333201 | 0.941569059 | 1           | 1.001045895   |
|         | 0.853081056                                                                    | 0.660183467 | 0.747684382 | 1           | 1.009887159 | 0.507579524   |
|         | 0.315485767                                                                    | 0.394944034 | 1           | 0.723316315 | 0.319130133 | 0.221308857   |
|         | 0.552521724                                                                    | 1           | 1.054652265 | 0.912809134 | 0.937347677 | 1.338204656   |
|         | 0.991836351                                                                    | 1           | 1.252276765 | 1.072951383 | 0.538464222 | 0.544034471   |
|         | 0.763691397                                                                    | 1           | 0.956739419 | 0.819382306 | 0.776872375 | 0.962295237   |
|         | 0.706318606                                                                    | 0.62957364  |             |             |             |               |
| YDR119W | YDR119W::YDR119W::molecular_function                                           | unknown     | 1           | 1.052369152 |             |               |
|         | 0.680727909                                                                    | 1.116793747 | 0.649368738 | 1           | 1.093876011 | 0.926214756   |
|         | 0.788975558                                                                    | 0.715120945 | 1           | 0.830971965 | 0.603217982 | 0.322526189   |
|         | 0.79344028                                                                     | 1           | 1.094593356 | 0.608446552 | 0.653678186 | 0.506065507 1 |
|         | 0.406212592                                                                    | 0.277830265 | 0.573035728 | 1           | 0.793313597 | 0.70270789    |
|         | 0.88155869                                                                     | 1.126737471 | 0.739372343 | 1           | 0.800236776 | 0.464170763   |
|         | 0.454824742                                                                    | 0.572349165 | 0.558820169 | 1           | 0.936837148 | 0.624040875   |
|         | 0.864285221                                                                    | 0.941276816 | 0.753706664 | 0.525374421 |             |               |

YLL050c YLL050c::COF1::yeast cortical cytoskeleton component; mammalian  
cofilin homolog 1 1.162727514 1.448013202 0.991938314 1.601527416 1  
1.19967382 1.151171257 1.540214053 1.413930352 1 1.144915117  
1.337858893 1.989406469 1.227862775 1 1.223819888 0.898977449  
1.206565649 1.989253522 1 1.891065785 2.284145866 2.726808799  
1.669697624 1 1.026486468 1.187282605 1.131897122 1.09796802  
0.967663925 1 1.271957608 1.860111395 1.371313035 1.294902642  
1.529286134 1 1.265234249 1.609808251 1.363171401 1.747087405  
1.767547535 1.226749244  
YDR121W "YDR121W::DPB4::DNA Polymerase B (II), 4th subunit" 1  
1.132768696 1.334119505 1.172251611 1.919203943 1 1.109046633  
1.132629844 1.869664431 1.692611311 1 0.919251561 0.975886756  
1.186439961 1.542133385 1 0.600963347 0.45518131 0.39902909  
1.043374765 1 0.980375622 1.149075766 0.70852175 0.942751228 1  
0.935222369 0.997806597 0.672169143 0.875245926 0.844864041 1  
0.970050262 1.123322365 0.773936863 1.163473093 2.187267347 1  
0.873078081 0.9380308 1.009612932 1.349463361 0.927336727 0.995584457  
YLL064C YLL064C::YLL064C::molecular\_function unknown 1 1.135516653  
1.396440901 0.939769655 1.306719063 1 1.040779311 0.916143703  
1.331928985 1.361055681 1 1.185775561 1.268621584 1.944888316  
1.15793935 1 1.685604063 1.324996289 1.781371412 1.56963408 1  
0.965791995 1.666499371 1.263547053 0.856791211 1 1.17860591  
1.094849274 1.067151188 1.285810239 1.014977837 1 0.92755161  
1.252937647 0.870576519 1.120582605 1 1.214108745 0.981585143  
0.943198233 1.205674413 0.929665262 1.223246689  
YLL066C YLL066C::YLL066C::molecular\_function unknown 1 0.820592628  
0.787519928 0.952287271 0.663520068 1 1.029177793 1.101580401  
0.753365552 0.728544249 1 0.804469927 0.899966509 0.558575454  
0.876529496 1 0.821790501 0.792029856 0.861989421 0.789109371 1  
0.660820727 0.68554852 0.441220485 0.745379008 1 0.930328502  
1.085689161 1.45990982 1.227403399 1.241580684 1 0.753670396  
0.82277587 0.87346878 1.154800637 0.783720304 1 0.947785613  
1.004428413 1.206195246 1.13052255 1.114722443 0.661096116  
YLR001C YLR001C::YLR001C::molecular\_function unknown 1 0.898744552  
0.994863757 1.06844765 0.960943384 1 1.020326358 1.112048598  
1.022069425 0.959349892 1 1.048581979 1.113712788 1.258599322  
1.111998428 1 1.604903246 1.644154821 2.280875354 1.531307439 1  
1.741955162 1.729602756 2.016533029 1 1.073841395 1.306344025  
1.674411057 1.335879064 1.035805587 1 1.085609299 0.921596436  
1.264598386 1.296974996 0.681829725 1 1.433763119 0.981738174  
1.443423927 0.954882559 1.173264283 0.899265805  
YLR003C YLR003C::YLR003C::molecular\_function unknown 1 0.672238578  
0.692790477 0.603996255 0.90528281 1 0.51931262 0.516329866  
0.830241849 1 0.38455007 0.329208699 0.330645319 0.731543873 1  
0.296227896 0.656564392 1 0.532549701 0.324120567 1  
0.725206029 0.645785311 0.67504867 0.813157068 0.95900099 1  
0.678158287 0.760306946 0.555286836 1.182376729 1.581296905 1  
0.796196844 0.76875239 0.908155246 1.349805981 0.735185556 1.028858158  
YEL041w YEL041w::YEL041W::molecular\_function unknown 1  
1.192195446 1.284439982 0.952898523 1 1.256034321 1.212143702  
1.006976559 1 1.35075687 1.330528778 1.45279033 1.057769869 1  
0.895236711 0.831034143 2.257337447 2.686414977 1 2.983920924  
4.446206934 10.74928722 4.941824741 1 0.975284061 1.194564292  
1.483953814 0.970438878 1.13457442 1 1.038810203  
1.470376864 1 1.231295721 1.225233693 0.992017463  
1.659399912

|         |                                                                                                     |               |               |                                     |
|---------|-----------------------------------------------------------------------------------------------------|---------------|---------------|-------------------------------------|
| YEL043w | YEL043w::YEL043W::molecular_function                                                                | unknown       | 1             | 1.072984653                         |
|         | 0.810231974                                                                                         | 1.005052328   | 0.522005578   | 1 1.19156377 1.253352984            |
|         | 0.67723597                                                                                          | 0.557796888   | 1 1.458389242 | 0.944289773 0.402346145             |
|         | 0.826277181                                                                                         | 1 0.573012978 | 0.571506242   | 0.612749114 0.376633981 1           |
|         | 0.959565264                                                                                         |               | 0.936674043   | 1 0.987392832 0.867473258           |
|         | 0.849390567                                                                                         | 1.145334792   | 1.086336946   | 1 0.85968446 0.541846927            |
|         | 0.666881277                                                                                         | 0.799353377   | 0.541630443   | 1 0.739752676 0.587890832           |
|         | 0.877327231                                                                                         | 0.477023223   | 0.820271126   |                                     |
| YEL045c | YEL045c::YEL045C::molecular_function                                                                | unknown       | 1             | 1.562137711                         |
|         | 1.30861587                                                                                          | 0.698408293   | 1 1.264719911 | 1.258134461 1.090427026 1           |
|         | 1.907858417                                                                                         |               | 1.187214556   | 1.583334909 1                       |
|         | 0.792910228                                                                                         |               | 1.422724861   | 1 0.930600346 0.622709979           |
|         | 0.978375173                                                                                         | 0.791248272   | 1 0.416422179 | 0.395785332 0.58302376              |
|         | 1 0.813868092                                                                                       | 0.456850731   | 1.414643663   | 0.331523996 0.773523654             |
|         | 0.573533695                                                                                         |               |               |                                     |
| YEL047c | YEL047c::YEL047C::fumarate reductase (NADH)                                                         |               | 1             | 1.541740343                         |
|         | 1.187012362                                                                                         | 1.539322632   | 0.860050264   | 1 1.479941469 1.57158768            |
|         | 1.06358993                                                                                          | 1.05161833    | 1 1.646706171 | 1.33586123 1.089890028              |
|         | 1.619418974                                                                                         |               | 1.739739985   | 1                                   |
|         | 1 0.883952152                                                                                       | 0.958244159   | 1.531144427   | 1.38388116 1.001235937 1            |
|         | 1.139303818                                                                                         | 1.316705495   | 2.711426809   | 3.056271693 0.564349878 1           |
|         | 1.204733766                                                                                         | 1.279228799   | 1.19382954    | 0.888468016 1.105280219 0.582289979 |
| YEL061c | YEL061c::CIN8::Kinesin-related protein involved in establishment and maintenance of mitotic spindle |               | 1             | 1.040641669 1.334056271             |
|         | 1.02160035                                                                                          | 1 1.349989675 | 1.328593069   | 0.910615882 1                       |
|         | 1.036734147                                                                                         | 1.118897859   |               | 1.010855992                         |
|         |                                                                                                     | 1             | 0.923322021   | 0.816398006 1.203254047             |
|         | 1.046239221                                                                                         | 1.20878996    | 1 0.764266171 | 0.582842516 1.144124889             |
|         | 0.9570999                                                                                           | 0.538393101   | 1 0.840724106 | 0.765456748 1.031610984             |
|         | 0.983814179                                                                                         | 0.793038893   | 0.813454714   |                                     |
| YEL063c | YEL063c::CAN1::arginine permease                                                                    |               | 1             | 1.32862465 1.305552631              |
|         | 1.373737801                                                                                         | 1.393973249   | 1 1.270558105 | 1.285830397 1.244092332             |
|         | 1.335306334                                                                                         | 1 1.257089552 | 1.255324139   | 1.412069889 1.266075285 1           |
|         | 0.929166821                                                                                         | 0.686452832   | 0.812207581   | 1.087122826 1 0.932749359           |
|         | 1.116829437                                                                                         | 1.176563845   | 0.569172609   | 1 0.839623006 0.998904078           |
|         | 0.891953272                                                                                         | 1.100518924   | 1.033192781   | 1 1.054872515 1.112737859           |
|         | 0.880846766                                                                                         | 0.869035336   | 0.573467905   | 1 0.999926735 1.073079621           |
|         | 0.890659566                                                                                         | 1.453139803   | 0.952845385   | 1.193475543                         |
| YEL065w | YEL065w::SIT1::Siderophore Iron Transport                                                           |               | 1             | 0.967898502                         |
|         | 0.820445029                                                                                         | 0.826801776   | 1.544183209   | 1 0.868068083 0.795108771           |
|         | 0.499028007                                                                                         | 1.307918689   | 1 6.186290847 | 4.555655579 1.106350921             |
|         | 1.655844714                                                                                         | 1 2.958221524 | 1.561090061   | 0.844983717 0.747610956 1           |
|         | 1.622305828                                                                                         | 0.693405276   | 0.311359126   | 0.591446972 1 3.513998042           |
|         | 3.325655744                                                                                         | 3.538706236   | 0.727021116   | 1.42758617 1 6.270599064            |
|         | 6.82238911                                                                                          | 8.598535269   | 3.966134396   | 0.230742187 1 5.889598937           |
|         | 4.857643395                                                                                         | 1.527817669   | 0.417934477   | 0.412768876 0.968440097             |
| YEL067c | YEL067c::YEL067C::molecular_function                                                                | unknown       | 1             | 1.214512465                         |
|         | 1.247955516                                                                                         | 1.274539654   | 1.175016442   | 1 1.098268409 1.22575499            |
|         | 1.368678916                                                                                         | 1 1.211959732 | 1.366679053   | 1.39376072 1.327771014 1            |
|         | 0.973461233                                                                                         |               | 1.421980359   | 1 1.233534465 1.409009221           |
|         | 1.080185584                                                                                         | 0.782469555   | 1 1.087379727 | 1.176278266 1.387465533             |
|         | 1.140560767                                                                                         | 1.090388565   | 1 1.024985545 | 1.069670678 1.42155502              |
|         | 1.225981946                                                                                         | 0.764150715   | 1 1.32801866  | 1.140132025 1.208788571             |
|         | 0.914151482                                                                                         |               |               |                                     |
| YEL069c | YEL069c::HXT13::high-affinity hexose transporter                                                    |               | 1             |                                     |
|         | 0.889944369                                                                                         | 0.916770508   | 1.243087035   | 1.005002853 1 1.071891103           |
|         | 0.933901008                                                                                         | 1 1.066212883 | 0.942566699   | 0.782424243 0.955766776 1           |

|         |                                                                                                                                                                                                                                 |             |             |             |             |             |
|---------|---------------------------------------------------------------------------------------------------------------------------------------------------------------------------------------------------------------------------------|-------------|-------------|-------------|-------------|-------------|
|         | 1.107475729                                                                                                                                                                                                                     |             | 0.303847596 |             |             | 1           |
|         | 1.070286259                                                                                                                                                                                                                     | 1.04793052  | 0.968372716 | 0.967458843 | 1.118645146 | 1           |
|         | 0.880751203                                                                                                                                                                                                                     | 0.752767377 | 0.976218731 | 0.876474684 | 0.620259856 | 1           |
|         | 0.987074155                                                                                                                                                                                                                     | 1.179571274 |             | 1.205172365 | 0.970241386 | 0.844977137 |
| YDR123C | YDR123C::INO2::Transcription factor required for derepression of inositol-choline-regulated genes involved in phospholipid synthesis                                                                                            |             |             |             |             | 1           |
|         | 0.654237553                                                                                                                                                                                                                     | 0.734712109 | 0.842267544 | 0.882965593 | 1           | 0.755269161 |
|         | 0.837536588                                                                                                                                                                                                                     | 0.748316681 | 0.781735144 | 1           | 0.638033229 | 0.650790466 |
|         | 0.595143735                                                                                                                                                                                                                     | 0.82866764  | 1           | 0.561405664 | 0.524611394 | 0.513132021 |
|         | 1.041932838                                                                                                                                                                                                                     | 1           | 0.801939476 | 0.994453915 | 0.854134135 | 0.993137068 |
|         | 1.187475036                                                                                                                                                                                                                     | 0.829029073 | 0.970172315 | 0.915964778 | 1.064966035 | 1           |
|         | 1.189858561                                                                                                                                                                                                                     |             | 1           | 1.221470673 | 1.202208923 |             |
|         | 1.429462629                                                                                                                                                                                                                     |             | 1.797656049 |             |             |             |
| YDR123C | YDR123C::INO2::Transcription factor required for derepression of inositol-choline-regulated genes involved in phospholipid synthesis                                                                                            |             |             |             |             |             |
|         | 1.003498902                                                                                                                                                                                                                     | 0.945218921 | 0.971668894 | 0.937852306 |             | 0.784244733 |
|         | 0.938085846                                                                                                                                                                                                                     | 0.920596282 |             | 0.608844154 | 1.040793557 | 1.139351878 |
|         | 0.83801459                                                                                                                                                                                                                      |             | 0.942815319 |             | 1.457852651 |             |
|         | 1                                                                                                                                                                                                                               | 0.843329094 | 0.872476331 | 0.857047112 | 0.838705612 | 1.006612604 |
|         | 0.749056403                                                                                                                                                                                                                     | 0.825991865 | 0.828334782 | 1.007286896 | 0.641952785 | 1           |
|         | 0.852818365                                                                                                                                                                                                                     | 0.79585527  | 0.856209023 |             | 0.945853342 | 0.733772912 |
| YEL071w | YEL071w::DL3::D-lactate dehydrogenase                                                                                                                                                                                           |             |             |             |             | 1           |
|         | 0.918562317                                                                                                                                                                                                                     | 0.952833594 | 0.569397253 | 1           | 0.958463889 | 0.906277596 |
|         | 0.613923182                                                                                                                                                                                                                     | 1           | 0.998202981 | 1.079046229 | 0.62393435  | 0.585438758 |
|         | 0.799119852                                                                                                                                                                                                                     | 1.044098983 | 0.71171578  | 0.727422213 | 1           | 0.918129515 |
|         | 0.681136272                                                                                                                                                                                                                     | 0.684575158 | 0.872189252 | 1           | 0.856703471 | 1.096665521 |
|         | 1.583019517                                                                                                                                                                                                                     | 1.45958984  | 1.13359105  | 1           | 1.265539623 | 1.44678892  |
|         | 3.766217831                                                                                                                                                                                                                     | 2.322572362 | 0.502400852 | 1           | 1.04872859  | 0.90275763  |
|         | 2.404275843                                                                                                                                                                                                                     | 0.769253156 | 0.561656143 | 0.571782469 |             |             |
| YDR125C | YDR125C::ECM18::ExtraCellular Mutant                                                                                                                                                                                            |             |             |             |             | 1           |
|         | 1.291453834                                                                                                                                                                                                                     | 1.072036393 | 1           | 1.166200927 | 1.432590599 | 1.093553335 |
|         | 1.209898471                                                                                                                                                                                                                     | 1.408364991 |             | 1.194731642 | 1           | 1.263756564 |
|         | 1.236146404                                                                                                                                                                                                                     | 1.146708447 | 1           | 1.089810371 | 1.071544073 | 1.367426269 |
|         | 1.063409721                                                                                                                                                                                                                     | 1           | 0.877720322 | 0.918281779 | 1.212638888 | 0.877881711 |
|         | 0.963303945                                                                                                                                                                                                                     | 1           |             | 0.959784997 | 1.352053066 | 1.410388091 |
|         | 0.935843547                                                                                                                                                                                                                     | 0.884139614 | 1.383500635 | 0.694946965 | 1.610288022 | 0.731146021 |
| YDR139C | YDR139C::RUB1::Related to ubiquitin (53% identical). Homolog of mammalian ubiquitin-like protein NEDD8. Matures by proteolytic removal of C-terminal asparagine (ASN) residue. Requires the proteins ULA1 & UBA3 for activation |             |             |             |             | 1           |
|         | 0.864993076                                                                                                                                                                                                                     | 1.711245758 | 1.451919634 | 1           | 0.806656261 | 1.24478852  |
|         | 1.454753419                                                                                                                                                                                                                     | 1.234784349 | 1           | 1.216826617 | 1.109206093 | 0.887833252 |
|         | 1.676649852                                                                                                                                                                                                                     | 1           | 1.607084783 | 2.133876737 | 1.961479501 | 1.035439779 |
|         | 0.759866568                                                                                                                                                                                                                     | 0.70874834  | 0.612772779 | 0.579332996 | 1.011962643 | 1           |
|         | 1.234272257                                                                                                                                                                                                                     | 2.362259193 | 1.510279843 | 2.217317887 | 3.019070938 | 1           |
|         | 1.139272654                                                                                                                                                                                                                     | 1.826708668 | 1.55566293  | 2.321593456 | 1.99740637  | 1.281037964 |
| YDR141C | "YDR141C::DOP1::homolog of Emericella nidulans developmental regulatory gene, dopey (dopA)." 1                                                                                                                                  |             |             |             |             | 0.937547364 |
|         | 0.724031275                                                                                                                                                                                                                     | 1           | 1.070454129 | 1.148363789 | 0.814015023 | 0.673737044 |
|         | 1.211857781                                                                                                                                                                                                                     | 1.205410232 | 0.503821084 | 1.032588426 | 1           | 1.4343224   |
|         | 1.103167531                                                                                                                                                                                                                     | 0.685251971 | 1           | 0.809951924 | 0.781747159 | 0.596255998 |
|         | 0.516737477                                                                                                                                                                                                                     | 1           | 1.010447586 | 0.964463476 | 0.854586625 | 1.004899692 |
|         | 0.903505093                                                                                                                                                                                                                     | 1           | 1.390024887 | 0.924131789 | 0.967355232 | 1.037989976 |
|         | 0.649064467                                                                                                                                                                                                                     | 1           | 0.944582371 | 0.902951722 | 0.962988105 | 0.800719352 |
|         | 0.909580079                                                                                                                                                                                                                     | 0.805574095 |             |             |             |             |
| YLR005w | YLR005w::SSL1::Component of RNA polymerase transcription factor                                                                                                                                                                 |             |             |             |             |             |
| TFIIH 1 | 0.757312937                                                                                                                                                                                                                     | 0.76047682  | 0.936020058 | 0.832024164 | 1           | 0.918746195 |

0.937022481 0.872091196 0.906569836 1 0.68760391 0.668299814  
0.654329674 1.058037329 1 0.917972637 0.232305925 0.897203062  
1.137640575 1 1.368309127 2.307855044 1.902893506 1.502138073 1  
0.905661541 0.854952356 0.886396686 1.149640351 1.100246404 1  
0.878136001 0.707562035 0.695752927 0.811900842 0.88412387 1  
1.039751544 0.872308625 0.933086008 1.162663076 0.857235872  
YDR143C YDR143C::SAN1::(putative) transcriptional regulator 1  
1.055420653 1.05968074 0.932813025 0.779908057 1 1.102174868  
1.084485629 0.915873209 0.730375303 1 1.067693464 1.1345144  
0.937380643 0.844543669 1 0.812984353 0.480574419 1.225304312  
0.573254986 1 0.793291754 0.965614746 0.727359356 0.60668933 1  
1.001517815 0.748037365 0.852231398 0.944326536 0.745888982 1  
0.722201571 0.73757244 0.579185257 0.730978935 0.629893782 1  
0.736565257 0.714309835 0.851479708 0.628255316 0.72928486 0.719762951  
YLR007W YLR007W::NSE1::<u>n</u>on-<u>S</u>MC <u>e</u>lement 1. essential for  
cell proliferation. 1 1.020409487 1.202597101 0.974133069 1.350676705 1  
0.93249627 0.950610818 1.53910346 1.463436246 1 0.799872206  
0.828002869 1.031472317 1.064157224 1 0.540586836 0.453631945  
0.651833318 1.008240376 1 0.706880057 1.562611491 1.537603911  
0.695435411 1 0.820192623 0.885706262 0.774617127 0.861042178  
1.10212203 1 0.819635 0.901441968 0.651868579 1.033670856  
1.299952165 1 0.926321258 0.819299062 1.128317938 1.155808906  
1.108105567 0.84847964  
YDR145W YDR145W::TAF12::TFIID subunit (TBP-associated factor) with predicted  
molecular weight of 61 kD. 1 0.776971289 0.906130217 0.932093741  
0.915657997 1 0.932035916 0.916565195 0.876070986 0.864099093 1  
0.908365864 0.956488125 0.766606487 0.930023678 1 1.027055071  
0.964315549 0.928212182 1.194961225 1 1.122303817 1.1585128  
1.02623731 1.186230709 1 0.783220622 0.633188349 0.650291736  
0.722925102 1 0.913467205 0.766560198 0.639887824 0.793728323  
0.624071543 1 1.111559951 1.005444521 1.145627695 1.008401697  
0.989268529 0.933415171  
YLR021W YLR021W::YLR021W::molecular\_function unknown 1 0.723414973  
1.065374907 0.729690063 1.373269457 1 0.797269161 0.772013446  
1.134692204 1 0.665556184 0.786181397 0.972249238 0.982443358 1  
0.879612228 0.688663249 0.52594661 1.508065951 1 1.782251526  
3.057658912 1.617779506 1.636581117 1 0.975986668 1.124563051  
0.782812451 0.766106983 1.109501262 1 1.19666464 1.478541016  
1.093162068 1.140244466 1.588323591 1 1.117640872 1.381431678  
0.996183078 1.604971777 1.165430208 1.372978396  
YDR147W YDR147W::EKI1::Ethanolamine Kinase 1 1 1.396319276  
1.418098731 1.398140611 1.350701028 1 1.274373862 1.207252751  
1.271273743 1.150351914 1 1.131819709 1.352669335 1.184663904  
1.202616811  
1.089904236 0.724355587 1.189153748 1.243939058 1 0.835936908  
0.639802233 0.902359216 1 1.009307817 0.960489997 0.711827911  
1.035184676 0.678175105 1.600640628  
YLR023C YLR023C::YLR023C::molecular\_function unknown 1 1.272238729  
1.115810608 1.366858731 0.905846678 1 1.369249337 1.330276583  
0.903162925 0.910814014 1 1.246970053 0.95913854 0.839795766  
1.056842695 1 0.962141987 0.730038272 0.855439111 0.676021802 1  
0.707220339 0.588918468 0.406043081 0.665155343 1 0.888834986  
0.817529619 1.070617625 1.199484467 0.840031931 1 0.827805479  
0.723039592 0.756570723 0.840583729 0.599833727 1 0.969110443  
0.761898906 1.051841156 0.7813846 1.164271924 0.554270006  
YDR149C YDR149C::YDR149C::molecular\_function unknown 1 0.582998773  
0.722040132 1.017198509 0.620028599 1 0.974303323 1.057252343

|             |                                                                                                                            |             |             |             |             |   |             |
|-------------|----------------------------------------------------------------------------------------------------------------------------|-------------|-------------|-------------|-------------|---|-------------|
| 0.523716418 | 1                                                                                                                          | 1.066569381 | 0.967240406 | 0.3941974   | 0.846173976 | 1 |             |
| 0.779836992 | 0.585566712                                                                                                                | 1           | 0.819620248 |             | 0.844906588 | 1 |             |
| 0.805743579 | 0.754656026                                                                                                                | 0.611890018 | 0.892277935 | 0.589768519 | 1           |   |             |
| 0.904281834 | 0.436087166                                                                                                                | 0.776987487 | 1.278648278 | 0.879788063 | 1           |   |             |
| 0.980821387 | 0.975305129                                                                                                                | 1.594356182 | 0.717762481 | 0.849522409 | 0.522747531 |   |             |
| YLR025w     | YLR025w::SNF7::Involved in derepression of SUC2 in response to glucose limitation                                          |             |             |             |             | 1 |             |
| 0.868862911 | 0.94921779                                                                                                                 | 1.154417549 | 1.153417109 | 1           | 0.950507812 |   |             |
| 1.131101235 | 1.379565801                                                                                                                | 0.9558754   | 1           | 1.146192836 | 0.983533013 |   |             |
| 0.949209934 | 1.3461867                                                                                                                  | 1           | 1.469070409 | 1.891458668 | 2.703504134 |   |             |
| 1.219432764 | 1                                                                                                                          | 0.781279681 | 1.20084241  | 0.658709261 | 0.509293637 |   |             |
| 0.813851757 | 1                                                                                                                          | 1.248872226 | 1.914701492 | 1.267859328 | 1.460582494 |   |             |
| 2.403237001 | 1                                                                                                                          | 1.510024474 | 1.696576826 | 1.202645789 | 1.367522507 |   |             |
| 1.642045618 | 1.060380634                                                                                                                |             |             |             |             |   |             |
| YDR163W     | YDR163W::CWC15::Complexed with Cef1p                                                                                       |             |             |             |             | 1 | 1.140317691 |
| 1.370142949 | 1.183469415                                                                                                                | 1.570432351 | 1           | 1.059540606 | 1.106542473 |   |             |
| 1.41882113  | 1.463384797                                                                                                                | 1           | 1.141481269 | 1.272568127 | 1.623345965 |   |             |
| 1.320863052 | 1                                                                                                                          | 0.930196404 |             | 0.822108457 | 1.504392427 | 1 |             |
| 1.064334363 | 1.162614355                                                                                                                | 1.170541531 | 0.685074908 |             | 0.810295286 |   |             |
| 0.930525445 |                                                                                                                            | 0.954958281 | 1           | 0.866790147 | 1.167982775 |   |             |
|             | 1                                                                                                                          |             |             | 0.959553642 | 1.108540012 |   |             |
| YLR027c     | "YLR027c::AAT2::aspartate aminotransferase, cytosolic"                                                                     |             |             |             |             | 1 |             |
| 1.145889739 | 1.024314284                                                                                                                | 0.832288128 | 0.561992502 | 1           | 1.023674776 |   |             |
| 1.035165278 | 0.739403984                                                                                                                | 0.647569799 | 1           | 1.325277541 | 1.579074158 |   |             |
| 0.913161194 | 0.582635535                                                                                                                | 1           | 1.54136205  | 1.207299602 | 1.482185443 |   |             |
| 0.969846621 | 1                                                                                                                          | 1.103908333 | 0.751531836 | 0.766549942 | 0.825760271 | 1 |             |
| 0.957318861 | 0.928892388                                                                                                                | 1.295635    | 0.996383601 | 0.626990476 | 1           |   |             |
| 1.083754189 | 1.306015524                                                                                                                | 1.062758566 | 1.164601804 | 0.523558185 | 1           |   |             |
| 1.02503957  | 1.022943103                                                                                                                | 1.092958485 | 0.720701825 | 0.778317409 | 0.547265    |   |             |
| YDR165W     | YDR165W::TRM82::Transfer RNA methyltransferase                                                                             |             |             |             |             | 1 | 1.3844048   |
| 0.959858876 | 4.500496691                                                                                                                | 0.66719436  | 1           | 2.766426503 | 1.45014306  |   |             |
| 2.715574717 | 2.243655607                                                                                                                | 1           | 0.615261223 | 1.734250786 | 1.206157023 |   |             |
| 2.531844753 | 1                                                                                                                          | 0.401946902 | 0.926986371 | 0.754123256 | 0.271786977 | 1 |             |
| 0.62355486  | 0.125539326                                                                                                                | 0.207827268 | 0.353418614 | 1           | 1.273424255 |   |             |
| 1.236550432 | 1.194480246                                                                                                                | 2.015584201 | 2.280157722 | 1           | 1.196929    |   |             |
| 0.474920926 | 0.662902171                                                                                                                | 0.802736592 | 0.240971138 | 1           | 0.818869957 |   |             |
| 0.396132141 | 0.393285776                                                                                                                | 0.481633914 | 0.505411082 | 0.453573238 |             |   |             |
| YLR029c     | YLR029c::RPL15A::Homology to rat L15                                                                                       |             |             |             |             | 1 | 1.087787528 |
| 1.137475352 | 0.957280935                                                                                                                | 1.769379217 | 1           | 1.091678611 | 1.197125395 |   |             |
| 1.338167258 | 1.440691491                                                                                                                | 1           | 0.911393402 | 1.011513804 | 0.788768578 |   |             |
| 0.97089982  | 1                                                                                                                          | 0.958419741 | 0.511722623 | 0.234070018 | 0.667511712 | 1 |             |
| 1.206277139 | 0.592042321                                                                                                                | 0.282104668 | 0.763025964 | 1           | 0.980699227 |   |             |
| 0.988424811 | 0.884210368                                                                                                                | 1.451906724 | 1.162401255 | 1           | 1.075873981 |   |             |
| 1.169678705 | 0.720389327                                                                                                                | 0.635845911 | 0.713551698 | 1           | 1.168381982 |   |             |
| 0.773283169 | 0.609595403                                                                                                                | 1.459374083 | 0.966871549 |             |             |   |             |
| YLR031W     | YLR031W::YLR031W::molecular_function_unknown                                                                               |             |             |             |             | 1 | 1.287321236 |
| 1.399830709 | 1.23374307                                                                                                                 | 1.449679676 | 1           | 1.212512675 | 1.269976146 |   |             |
| 1.476240249 | 1                                                                                                                          | 1.064825697 | 1.033991908 | 1.530490402 | 1           |   |             |
| 0.937603125 | 0.718753236                                                                                                                | 1.450819438 | 1.628694276 |             | 0.158326721 |   |             |
| 0.48530703  |                                                                                                                            | 1           | 0.888389206 | 1.066367494 | 1.075253714 |   |             |
| 0.993987601 | 1.019276279                                                                                                                | 1           | 0.981202076 | 0.98176205  | 1.045111008 |   |             |
| 1.078197418 | 0.847763089                                                                                                                | 1           | 1.001090813 | 0.762929819 | 1.009369638 |   |             |
| 0.869069398 | 0.845594745                                                                                                                | 0.994708897 |             |             |             |   |             |
| YLR045c     | "YLR045c::STU2::May play a role in attachment, organization, and/or dynamics of microtubule ends at the spindle pole body" |             |             |             |             | 1 | 0.728393606 |
| 0.929966256 | 0.989334649                                                                                                                | 0.987190641 | 1           | 0.905093662 | 0.84451488  |   |             |
| 0.877561787 | 0.965325903                                                                                                                | 1           | 0.760490597 | 0.787102148 | 0.622559149 |   |             |

|             |                                                                                                                                                                                                                                                                  |             |             |             |             |             |
|-------------|------------------------------------------------------------------------------------------------------------------------------------------------------------------------------------------------------------------------------------------------------------------|-------------|-------------|-------------|-------------|-------------|
| 1.188324813 | 1                                                                                                                                                                                                                                                                | 0.675487189 | 0.840318716 | 0.712931102 | 0.683269832 | 1           |
| 0.892525726 | 0.801098345                                                                                                                                                                                                                                                      |             | 0.67140421  | 1           | 0.931874793 | 0.923010655 |
| 0.887104692 | 0.877234285                                                                                                                                                                                                                                                      | 0.979203248 | 1           | 0.898185276 | 0.626178761 |             |
| 1.045043919 | 1.214652015                                                                                                                                                                                                                                                      | 0.602766688 | 1           | 0.899031015 | 0.897016024 |             |
| 1.244615227 | 0.791992148                                                                                                                                                                                                                                                      | 1.08539707  | 1.126052476 |             |             |             |
| YLR047C     | YLR047C::YLR047C::molecular_function                                                                                                                                                                                                                             | unknown     |             | 1           | 0.884449616 |             |
| 0.651902889 | 0.836419258                                                                                                                                                                                                                                                      | 0.480535544 | 1           | 1.058015236 | 1.039573221 |             |
| 0.463508888 | 0.41031196                                                                                                                                                                                                                                                       | 1           | 1.729542025 | 1.277499168 | 0.266603253 |             |
| 0.813543031 |                                                                                                                                                                                                                                                                  |             |             |             | 0.451905161 |             |
| 1           | 1.092060524                                                                                                                                                                                                                                                      | 1.137005954 | 1.241395463 | 1.086311237 | 1           |             |
| 1.302353182 | 0.796292906                                                                                                                                                                                                                                                      | 1.331449354 | 0.667471645 | 0.273706697 |             |             |
| 1.34080562  | 0.947277636                                                                                                                                                                                                                                                      |             | 0.726041768 | 0.78820745  | 0.61556368  |             |
| YER008c     | "YER008c::SEC3::Profilin synthetic lethal protein, has region of coiled-coil structure; subunit of the Exocyst complex--the Exocyst complex contains the gene products encoded by SEC3, SEC5, SEC6, SEC8, SEC10, SEC15 and EXO70 and is required for exocytosis" |             | 1           | 0.946147132 | 1.027724299 |             |
| 1.317673085 | 0.938867928                                                                                                                                                                                                                                                      | 1           | 1.083003392 | 1.262758766 | 1.015512001 |             |
| 0.862296952 | 1                                                                                                                                                                                                                                                                | 1.231653622 | 1.336768851 | 0.766854805 | 1.160487774 | 1           |
| 0.8441049   | 0.924291304                                                                                                                                                                                                                                                      | 1.050913704 | 0.612087186 | 1           | 0.891992979 |             |
| 1.334747173 | 1.215985865                                                                                                                                                                                                                                                      | 0.872553078 | 1           | 1.11533948  | 1.103155294 |             |
| 1.02877795  | 1.122340456                                                                                                                                                                                                                                                      | 0.915533955 | 1           | 1.094383396 | 0.67392356  |             |
| 0.735250617 | 0.833014844                                                                                                                                                                                                                                                      | 0.457200347 | 1           | 1.004211996 | 0.941068169 |             |
| 1.074645303 | 0.777352468                                                                                                                                                                                                                                                      | 0.769037069 | 1.061256299 |             |             |             |
| YER010c     | YER010c::YER010C::molecular_function                                                                                                                                                                                                                             | unknown     |             |             | 1.08599517  |             |
| 1.121735746 | 0.770402606                                                                                                                                                                                                                                                      | 1.134625109 |             | 0.869302698 | 0.930329557 |             |
| 1.172607287 | 1.043259901                                                                                                                                                                                                                                                      |             | 0.947626768 | 0.996369384 | 1.373064994 |             |
| 0.89969092  | 1                                                                                                                                                                                                                                                                | 0.924742031 | 0.975143798 | 1.022289701 | 1.216347197 | 1           |
| 1.09327919  | 2.042798316                                                                                                                                                                                                                                                      |             | 0.968926943 | 1           | 0.973968522 | 1.123356887 |
| 1.039744026 | 0.890300814                                                                                                                                                                                                                                                      | 0.954711191 | 1           | 0.892732502 | 1.542195223 |             |
| 1.371292455 | 1.097979633                                                                                                                                                                                                                                                      | 1.559899187 | 1           | 0.872291858 | 1.206134402 |             |
| 0.866717028 | 1.211724464                                                                                                                                                                                                                                                      | 0.89721365  | 1.281037964 |             |             |             |
| YER012w     | YER012w::PRE1::Required for mitotic division and sporulation                                                                                                                                                                                                     |             |             |             |             | 1           |
| 0.830471026 | 1.176351732                                                                                                                                                                                                                                                      | 0.923511396 | 1.262976231 | 1           | 0.823200668 |             |
| 0.969422191 | 1.380199072                                                                                                                                                                                                                                                      | 1.233960145 | 1           | 0.93665321  | 1.283894062 |             |
| 1.887017715 | 0.944051328                                                                                                                                                                                                                                                      | 1           | 1.02085349  | 0.880416459 | 1.211199169 |             |
| 1.640983211 | 1                                                                                                                                                                                                                                                                | 1.556736494 | 2.441941997 | 2.770670847 | 1.135498329 | 1           |
| 1.08234967  | 1.428804824                                                                                                                                                                                                                                                      | 0.920199791 | 0.571196085 | 0.945952494 | 1           |             |
| 1.270493661 | 2.665839364                                                                                                                                                                                                                                                      | 1.837690666 | 1.130513625 | 1.61668284  | 1           |             |
| 1.411176866 | 2.25328723                                                                                                                                                                                                                                                       | 1.34522687  | 1.468462302 | 1.390521541 | 1.849317878 |             |
| YER014w     | YER014w::HEM14::converts protoporphyrinogen IX to protoporphyrin IX (in synthesis of heme)                                                                                                                                                                       |             | 1           | 0.614164921 | 0.878308302 | 0.940594589 |
| 0.888923802 | 1.083990998                                                                                                                                                                                                                                                      | 0.93899993  | 0.979049676 | 1           | 0.914952964 |             |
| 0.877572708 | 0.994550606                                                                                                                                                                                                                                                      | 1.311047549 | 1           | 0.634544975 |             |             |
| 0.962836601 | 1                                                                                                                                                                                                                                                                | 1.480172595 | 1.45700233  | 1.805204429 | 0.941286828 | 1           |
| 0.942798389 | 0.983914407                                                                                                                                                                                                                                                      | 0.902931277 | 1.406386692 | 1.282738924 | 1           |             |
| 1.033956762 | 0.940004147                                                                                                                                                                                                                                                      | 0.885334193 | 1.143716441 | 1           | 0.992054747 |             |
| 0.84806275  | 0.962083584                                                                                                                                                                                                                                                      | 0.92229343  | 0.874447766 | 0.736399802 |             |             |
| YER016w     | YER016w::BIM1::binding to microtubules                                                                                                                                                                                                                           |             | 1           |             | 0.672782849 |             |
| 0.669567971 | 0.92116673                                                                                                                                                                                                                                                       | 0.724478562 | 1           | 0.841429274 | 0.786553425 |             |
| 0.935759292 | 0.929145942                                                                                                                                                                                                                                                      | 1           | 0.670649729 | 0.783500227 | 0.731490836 |             |
| 0.895448998 | 1                                                                                                                                                                                                                                                                | 0.676834172 | 1.709184525 | 1.881215828 | 0.489174231 | 1           |
| 0.635999282 | 0.531505702                                                                                                                                                                                                                                                      | 0.435972128 | 0.448076919 | 1           | 1.070935144 |             |
| 1.345376635 | 1.224742151                                                                                                                                                                                                                                                      | 1.493929034 | 1.338128111 | 1           | 1.077044574 |             |
| 0.835454125 | 0.840180956                                                                                                                                                                                                                                                      | 1.102665085 | 0.606036158 | 1           | 0.728746235 |             |
| 0.571973424 | 0.762188134                                                                                                                                                                                                                                                      | 0.609458    | 0.650683196 | 0.529752537 |             |             |
| YER018c     | YER018c::SPC25::Spindle Pole Component of molecular weight 25kDa                                                                                                                                                                                                 |             |             |             |             | 1           |
| 0.853072583 | 0.873477438                                                                                                                                                                                                                                                      | 0.780153452 | 0.868969566 | 1           | 0.828138352 |             |

|             |                                                                                                                                           |             |             |             |             |   |
|-------------|-------------------------------------------------------------------------------------------------------------------------------------------|-------------|-------------|-------------|-------------|---|
| 0.932025637 | 0.960436547                                                                                                                               | 1           | 0.953222458 | 0.950939236 | 1.10298487  |   |
| 0.893724346 | 1                                                                                                                                         |             | 0.551076016 | 0.930737949 | 1.014547508 | 1 |
| 1.156674934 | 3.529877654                                                                                                                               | 1.692121688 | 1.549225998 | 1           | 1.151221197 |   |
| 0.885980385 | 1.005973562                                                                                                                               | 1.040236412 | 0.875992565 | 1           | 1.066867088 |   |
| 1.382224456 | 1.227844674                                                                                                                               | 1.237778527 | 1.084299573 | 1           | 0.933832576 |   |
| 0.916397878 | 0.822894938                                                                                                                               | 0.912080521 | 0.927431058 | 1.313436    |             |   |
| YER031c     | YER031c::YPT31::probably involved in intra-Golgi transport or in the formation of transport vesicles at the most distal Golgi compartment |             |             |             |             | 1 |
| 0.727209552 | 0.861590552                                                                                                                               | 0.71314562  | 1.017802342 | 1           | 0.74363049  |   |
| 0.772024022 | 1.025069901                                                                                                                               | 1.040216522 | 1           | 0.640459393 | 0.788185817 |   |
| 0.885998125 | 0.801993637                                                                                                                               | 1           | 0.927933792 | 0.636816165 | 0.643996575 |   |
| 0.958975157 | 1                                                                                                                                         | 1.494914837 | 2.319551364 | 2.567766999 | 1.704142631 | 1 |
| 1.229396583 | 1.339086709                                                                                                                               | 1.373645516 | 1.122171108 | 1.163088684 | 1           |   |
| 0.898938577 | 1.30649014                                                                                                                                | 0.804289577 | 0.805488626 | 1.352519017 | 1           |   |
| 1.14413937  | 1.181359157                                                                                                                               | 1.012611886 | 1.425177995 | 1.094037913 | 1.092778775 |   |
| YER033c     | YER033c::ZRG8::Zinc regulated gene                                                                                                        |             |             |             |             | 1 |
| 1.215050257 | 0.28638509                                                                                                                                |             | 0.527260006 | 1           | 2.105328493 |   |
| 1.123609712 | 1                                                                                                                                         | 1.563191692 | 1.493022335 | 1.479169268 |             |   |
| 0.972761626 | 1.194681529                                                                                                                               | 1           | 0.98794047  | 1.565246473 |             |   |
| 1.247252832 | 1.12430125                                                                                                                                |             |             |             |             |   |
| YER035w     | YER035w::EDC2::Enhancer of mRNA Decapping                                                                                                 |             |             |             |             | 1 |
| 1.63449656  | 1.213554938                                                                                                                               | 1.391690528 | 1           | 1.218049141 | 1.463856286 |   |
| 1.514105099 | 1.697026166                                                                                                                               | 1           | 1.186554495 | 1.798582066 | 3.070061316 | 1 |
| 1.350430885 | 1.339471978                                                                                                                               | 1.508821476 | 2.852019779 | 1           | 1.734846236 |   |
| 2.734074145 | 2.887885106                                                                                                                               | 2.283642141 | 1           | 1.453716598 | 1.925523719 |   |
| 2.003199144 | 1.467868229                                                                                                                               | 1.526330455 | 1           | 1.54424947  | 1.122399098 |   |
| 1.463098255 | 1.444741692                                                                                                                               | 1.432810912 | 1           | 1.479078706 | 1.049191851 |   |
| 1.118449446 | 1.248987806                                                                                                                               | 1.544885185 | 1.63916811  |             |             |   |
| YDR167W     | YDR167W::TAF10::TFIID subunit (TBP-associated factor) with predicted molecular weight of 23 kD.                                           |             |             |             |             | 1 |
| 1.245377114 | 1                                                                                                                                         | 0.878087315 | 0.850746208 | 1.345018003 | 1.304294107 | 1 |
| 0.887125273 | 1.06874796                                                                                                                                | 1.139611745 | 1.235062563 | 1           | 1.103471994 |   |
| 0.920426589 | 0.874475869                                                                                                                               | 1.182766367 | 1           | 1.190059577 | 0.936097725 |   |
| 0.947276116 | 0.985164205                                                                                                                               | 1           | 1.042960957 | 1.207008169 | 0.849259977 |   |
| 0.783767143 | 1.054019738                                                                                                                               | 1           | 1.126847306 | 1.583501681 | 1.389166964 |   |
| 1.24364459  | 1.774162359                                                                                                                               | 1           | 1.320086911 | 1.247900697 |             |   |
| 1.084509259 | 1.407127762                                                                                                                               |             |             |             |             |   |
| YER037w     | YER037w::PHM8::involved in phosphate metabolism                                                                                           |             |             |             |             | 1 |
| 1.179149547 | 1.234062449                                                                                                                               | 1.384691169 | 1           | 1.250531094 | 1.579710502 |   |
| 1.543806033 | 1                                                                                                                                         | 1.30960829  | 2.219536971 | 2.42329609  | 1.300840209 | 1 |
| 3.567931464 | 3.039087306                                                                                                                               | 3.31516864  | 1.870363075 | 1           | 1.890055738 |   |
| 2.873039635 | 4.59830616                                                                                                                                | 1           | 1.064902934 | 1.508201831 | 1.478709556 |   |
| 0.976485647 | 1.374706796                                                                                                                               | 1           | 1.24580626  | 1.561826724 | 1.464019347 |   |
| 1.051890713 | 1.518830349                                                                                                                               | 1           |             | 0.943519254 | 1.361366188 |   |
| 1.395406963 | 1.207485451                                                                                                                               |             |             |             |             |   |
| YDR169C     | YDR169C::STB3::binds Sin3p in two-hybrid assay                                                                                            |             |             |             |             | 1 |
| 0.913542333 | 0.978864583                                                                                                                               | 0.824667079 | 1           | 0.978798214 | 1.112665076 |   |
| 0.742121241 | 0.715008119                                                                                                                               | 1           | 1.030682088 | 1.086589071 | 0.885211628 |   |
| 0.909513505 | 1.331854591                                                                                                                               |             |             |             | 0.788141043 |   |
| 0.99186028  | 0.633636468                                                                                                                               |             | 1.444109174 |             |             | 1 |
| 1.587674127 | 1.375373967                                                                                                                               | 1.573552233 | 1.46908896  | 1           |             |   |
| 1.391044692 | 1.182626767                                                                                                                               | 1.221141177 | 0.79331536  |             |             |   |
| YDR171W     | YDR171W::HSP42::Similar to HSP26; expression is regulated by stress conditions                                                            |             |             |             |             | 1 |
| 1.65557447  | 1.975391048                                                                                                                               | 1.597637815 | 1.167112507 | 1           | 2.235474077 |   |
| 3.792722786 | 5.130282396                                                                                                                               | 1.420539045 | 1           | 6.666378272 | 6.857544718 |   |



|         |                                                                                                                       |             |             |             |             |             |
|---------|-----------------------------------------------------------------------------------------------------------------------|-------------|-------------|-------------|-------------|-------------|
|         | 8.099577378                                                                                                           | 6.641289563 | 1           | 6.621126039 | 8.640848313 | 10.43691454 |
|         | 3.833463584                                                                                                           |             |             | 1.571516368 | 1.811349218 | 0.904241751 |
|         | 0.773152603                                                                                                           | 1           |             | 5.614283078 | 1.138283902 | 2.618710478 |
|         | 1.526500637                                                                                                           | 1           |             | 4.385964165 | 1.243038985 | 0.709487833 |
|         | 1.977310331                                                                                                           |             |             | 1.246012933 |             |             |
| YDR173C | YDR173C::ARG82::Regulator of arginine-responsive genes with ARG80 and ARG81                                           |             |             |             |             |             |
|         | 1                                                                                                                     | 1.046867992 | 1.308409794 | 1.185839463 | 1.332841667 | 1           |
|         | 1.194632227                                                                                                           | 1.01865466  |             | 1.146317656 | 1           | 0.907713631 |
|         | 1.549139815                                                                                                           | 1.113827121 | 1           | 1.595123723 | 1.537017544 | 1.759319336 |
|         | 1.718221101                                                                                                           | 1           |             | 1.129908054 | 1.7444772   | 1.085537003 |
|         | 0.942681558                                                                                                           | 1.028087902 | 1.09014175  | 0.887142846 | 1.043947315 | 1           |
|         | 0.998518764                                                                                                           | 1.182834815 | 1.804841151 | 0.956040968 | 1.137044956 | 1           |
|         | 1.185873759                                                                                                           |             |             | 0.91333273  | 1.26147904  | 1.057815749 |
| YDR187C | YDR187C::YDR187C::molecular_function unknown                                                                          |             |             |             |             |             |
|         | 1                                                                                                                     |             |             |             | 1           | 1.005861494 |
|         | 0.704858322                                                                                                           | 1.340523851 | 0.611794833 | 1           | 1.341353386 | 1.305846451 |
|         | 0.874399948                                                                                                           | 0.972538804 | 1           | 0.99454756  | 1.031171635 | 0.628626029 |
|         | 1.044477507                                                                                                           |             |             | 3.380360484 | 3.271830027 | 1.91166559  |
|         | 0.473591316                                                                                                           |             |             | 1           | 0.798130821 | 1.33590435  |
|         | 1.169483648                                                                                                           | 1           |             | 0.831953511 | 0.553199038 | 0.880887342 |
|         | 0.84258631                                                                                                            | 1           |             | 0.579317528 | 0.503351881 | 0.755699762 |
|         | 0.53868648                                                                                                            |             |             | 1.534093225 |             |             |
| YDR189W | YDR189W::SLY1::Hydrophilic suppressor of ypt1 involved in vesicle trafficking between ER and Golgi<br>Sm like protein |             |             |             |             |             |
|         | 1                                                                                                                     |             |             |             | 1           | 0.864076214 |
|         | 0.880351739                                                                                                           | 0.961434413 |             | 1           | 1.068698633 | 1.039787759 |
|         | 0.786858702                                                                                                           | 1           |             | 0.90115524  | 0.835054403 | 0.637469061 |
|         | 0.822360835                                                                                                           | 0.989013832 | 1.016694084 | 0.618819205 | 1           | 0.673339534 |
|         | 0.726193172                                                                                                           | 1           |             | 0.899014332 | 0.987067271 | 0.940444592 |
|         | 0.782092572                                                                                                           | 0.60780767  | 0.790347124 | 0.804430055 | 0.553495878 | 1           |
|         | 0.600094867                                                                                                           | 0.646274152 | 0.864762409 | 0.504931892 | 0.856338144 | 0.693494204 |
| YDR191W | YDR191W::HST4::Homolog of SIR2                                                                                        |             |             |             |             |             |
|         | 1                                                                                                                     |             |             |             | 1           | 1.030316118 |
|         | 1.051326037                                                                                                           | 1.009507649 | 1           | 0.984205974 | 1.028996752 | 1.417530212 |
|         | 1.132582545                                                                                                           | 1           |             | 1.017072817 | 1.109952925 | 1.177118924 |
|         | 0.755343074                                                                                                           |             |             | 0.833702922 | 1.038176309 | 1           |
|         | 1.059586426                                                                                                           | 0.85493715  | 1           | 0.941055462 | 1.196708049 | 0.961078301 |
|         | 1.002688413                                                                                                           | 1.234210052 | 1           | 1.071838226 | 0.955700466 | 1.000473706 |
|         | 0.758658037                                                                                                           | 1.651442386 | 1           | 1.198326751 | 0.937192889 | 1.117978735 |
|         | 1.014460868                                                                                                           |             |             |             |             |             |
| YDR193W | YDR193W::YDR193W::molecular_function unknown                                                                          |             |             |             |             |             |
|         | 1                                                                                                                     |             |             |             | 1           | 1.851918372 |
|         | 1.828044083                                                                                                           | 1.907973619 | 1.618166348 | 1           | 1.56448564  | 1.763135739 |
|         | 1.646367036                                                                                                           | 1.478076024 | 1           | 1.693670476 | 1.655463723 | 1.630448036 |
|         | 2.247914332                                                                                                           |             |             |             |             | 1.064544513 |
|         | 1                                                                                                                     |             |             |             |             | 0.947089731 |
|         | 0.828792924                                                                                                           | 0.600961333 | 0.636172063 | 0.890451476 | 0.781691669 | 1           |
|         | 0.683577331                                                                                                           | 0.614864549 | 0.859463233 | 0.834616599 | 1.171456752 | 0.838847796 |
| YDR195W | "YDR195W::REF2::RNA-binding protein involved in cleavage step of mRNA 3'-end formation, prior to polyadenylation"     |             |             |             |             |             |
|         |                                                                                                                       |             |             |             |             | 0.687058181 |
|         | 0.864362866                                                                                                           | 0.969432564 | 1.035749171 |             | 0.889885097 | 0.871016907 |
|         | 1.240181266                                                                                                           | 1.035825767 |             | 0.66068631  | 0.888482252 | 1.033012348 |
|         | 1.072971901                                                                                                           | 1           |             | 1.300958471 | 1.446814512 | 1           |
|         | 1.268381557                                                                                                           | 1.99960622  | 1.157673064 | 1           | 0.956470345 | 1.05874523  |
|         | 0.977343765                                                                                                           | 0.932592852 | 1.348093222 | 1           | 0.726564194 | 0.802450935 |
|         | 0.679210353                                                                                                           | 0.79057899  |             | 1           | 0.909429409 | 1.242077937 |
|         | 1.103556058                                                                                                           | 0.999962573 |             |             |             | 1.562869937 |
| YDR197W | YDR197W::CBS2::Translational activator of COB mRNA; soluble protein                                                   |             |             |             |             |             |
|         | 1                                                                                                                     |             |             |             | 1           | 0.88767809  |
|         | 0.95680221                                                                                                            | 1.36029785  | 1.092166491 | 1           | 0.905196381 | 0.979513524 |
|         | 1.16457144                                                                                                            | 1.018282415 | 1           | 1.372639811 | 1.129840247 | 1.537137799 |

|             |                                                                                                                                                                                                                                |                                                               |             |             |                           |
|-------------|--------------------------------------------------------------------------------------------------------------------------------------------------------------------------------------------------------------------------------|---------------------------------------------------------------|-------------|-------------|---------------------------|
| 1.886667484 | 2.21082124                                                                                                                                                                                                                     | 2.631232976                                                   | 1.59248276  | 1           | 0.919930809               |
| 1.171576918 | 0.970558413                                                                                                                                                                                                                    | 0.854949674                                                   | 0.989687667 | 1           | 1.036208546               |
| 1.174844129 | 1.113773368                                                                                                                                                                                                                    | 1.075083589                                                   | 1.316728162 | 1           | 1.141002582               |
| 1.309090157 | 1.068043054                                                                                                                                                                                                                    | 1.191085561                                                   | 1.047246286 |             |                           |
| YAL034WA    | YAL034WA::MTW1::Mis                                                                                                                                                                                                            | TWelve like (a Schizosaccharomyces pombe kinetochore protein) |             |             |                           |
|             | 1                                                                                                                                                                                                                              | 1.282190461                                                   | 1.130740533 | 1.217174906 | 0.967283722 1             |
| 1.203606493 | 1.198320525                                                                                                                                                                                                                    | 0.940681779                                                   | 1           | 1.125547815 | 1.129621301               |
| 0.847568565 | 1.108368598                                                                                                                                                                                                                    | 1                                                             | 0.806795925 | 0.78031502  | 0.637104829               |
| 0.452638235 | 1                                                                                                                                                                                                                              | 0.902716263                                                   | 0.791162179 | 1           | 0.854909519               |
| 0.640932534 | 0.567042247                                                                                                                                                                                                                    | 0.814075046                                                   |             | 0.735761554 | 1.196336534               |
| 1.309819346 | 2.696196345                                                                                                                                                                                                                    | 0.862433488                                                   | 0.917318599 | 0.77159135  |                           |
| 1.189369763 | 1.607645634                                                                                                                                                                                                                    |                                                               |             |             |                           |
| YER039c     | YER039c::HVG1::Homologous to VRG4                                                                                                                                                                                              | 1                                                             | 1.62969655  | 1.566301738 |                           |
| 1.264181254 | 1.458019546                                                                                                                                                                                                                    | 1                                                             | 1.281047411 | 1.214808548 | 1.661044444               |
| 1.501940883 | 1                                                                                                                                                                                                                              | 1.644143432                                                   | 1.59174013  | 2.201977249 | 1.247583142 1             |
| 0.932037435 | 0.963116341                                                                                                                                                                                                                    | 1.814962434                                                   | 1.601328357 | 1           | 1.136185359               |
| 1.930835325 | 1.940384125                                                                                                                                                                                                                    | 0.701290289                                                   | 1           | 1.144982134 | 1.337896632               |
| 1.19940848  | 1.184967355                                                                                                                                                                                                                    | 1.109616604                                                   | 1           | 1.241609797 | 1.328840182               |
| 1.159464023 | 1.028937873                                                                                                                                                                                                                    | 1.595107158                                                   | 1           | 1.055826217 | 1.122912841               |
| 0.971218743 | 1.300240592                                                                                                                                                                                                                    | 1.410198886                                                   | 1.276659744 |             |                           |
| YAL065CA    | YAL065CA                                                                                                                                                                                                                       | 1                                                             | 1.55978357  | 1.12927181  | 1.233510028 1.054491044 1 |
| 1.275615227 | 1.183116096                                                                                                                                                                                                                    | 1.1496391                                                     | 1.141099164 | 1           | 1.373360216               |
| 1.181268048 | 1.376039867                                                                                                                                                                                                                    | 1.417342529                                                   | 1           | 0.765761539 | 1.108017505               |
| 1.134359106 | 0.987815801                                                                                                                                                                                                                    | 1                                                             | 1.0009355   | 1.331210762 | 0.885946892               |
| 1.098853203 | 1                                                                                                                                                                                                                              | 0.898495652                                                   | 0.654425526 | 1.093786908 | 1.048923059               |
| 0.542282644 | 1                                                                                                                                                                                                                              | 0.536778148                                                   | 0.731908514 | 1.006676371 | 0.938457841               |
| 0.979630662 | 1                                                                                                                                                                                                                              | 0.909604175                                                   | 0.823496818 | 0.862661422 | 0.701703023               |
| 0.846045272 | 0.837972183                                                                                                                                                                                                                    |                                                               |             |             |                           |
| YER041w     | YER041w::YEN1                                                                                                                                                                                                                  | 1                                                             | 1.373579173 | 1.119695743 | 0.768891965               |
| 1.269410589 | 1                                                                                                                                                                                                                              | 0.986777552                                                   | 1.005610994 | 1.098355924 | 1.120812752 1             |
| 0.9358325   | 0.775757059                                                                                                                                                                                                                    | 0.832635745                                                   | 0.861229404 | 1           | 0.833040868               |
| 0.487907424 | 0.360143998                                                                                                                                                                                                                    | 1.019133597                                                   | 1           | 1.220215233 | 1.032675549               |
| 0.682298302 | 1.108676893                                                                                                                                                                                                                    | 1                                                             | 1.315423381 | 1.060858993 | 1.077000698               |
| 1.058300964 | 1.32602488                                                                                                                                                                                                                     | 1                                                             | 1.272163458 | 1.38801166  | 0.907723718               |
| 0.621556236 | 1.166866573                                                                                                                                                                                                                    | 1                                                             | 1.180198968 | 1.553585962 | 0.815193098               |
| 1.623247684 | 1.294420581                                                                                                                                                                                                                    | 1.105037457                                                   |             |             |                           |
| YER054c     | "YER054c::GIP2::Glc7-interacting protein; shares homology with PIG2; contains conserved 25 residue motif, called the GVNK motif, also found in GAC1, PIG1, PIG2, and RGI, the mammalian type 1 phosphatase targeting subunit." |                                                               |             |             | 1                         |
| 0.886036381 | 0.868765827                                                                                                                                                                                                                    | 1.192614491                                                   | 0.688044714 | 1           | 1.085043814               |
| 1.376164862 | 0.884434675                                                                                                                                                                                                                    | 0.66843054                                                    | 1           | 1.02192881  | 1.041307529               |
| 0.875982798 | 0.963800919                                                                                                                                                                                                                    | 1                                                             | 1.449162842 | 1.102973479 | 1.889466618               |
| 1.04865655  | 1                                                                                                                                                                                                                              | 0.889573341                                                   | 0.696653243 | 0.951465309 | 0.597793387 1             |
| 0.80118477  | 0.816430692                                                                                                                                                                                                                    | 0.813912024                                                   | 1.166450805 | 0.842005191 | 1                         |
| 0.807010411 | 0.579363521                                                                                                                                                                                                                    | 0.769210328                                                   | 0.898191629 | 0.46328073  | 1                         |
| 0.636392392 | 0.763248608                                                                                                                                                                                                                    | 0.971494852                                                   | 0.735437747 | 0.937481652 | 1.084898103               |
| YER057c     | YER057c::HMF1::Homologous Mmflp factor                                                                                                                                                                                         | 1                                                             | 1.117692363 |             |                           |
| 1.261344729 | 0.887106077                                                                                                                                                                                                                    | 1.370693295                                                   | 1           | 0.929948528 | 1.034074436               |
| 1.475511844 | 1.355925824                                                                                                                                                                                                                    | 1                                                             | 1.104564419 | 1.21990675  | 1.828892678               |
| 1.231645497 | 1                                                                                                                                                                                                                              | 1.183416647                                                   | 0.969255778 | 1.050921636 | 1.330370337 1             |
| 1.415908177 | 1.974630756                                                                                                                                                                                                                    | 1.939207395                                                   | 1.370665211 | 1           | 1.151209082               |
| 1.139175378 | 1.12691724                                                                                                                                                                                                                     | 0.966233338                                                   | 0.894668419 | 1           | 0.953639936               |
| 1.714569279 | 1.279680825                                                                                                                                                                                                                    | 1.222444532                                                   | 2.062661176 | 1           | 1.138174064               |
| 1.541860935 | 1.220111713                                                                                                                                                                                                                    | 1.753107529                                                   | 1.270248417 | 1.330948463 |                           |
| YER059w     | YER059w::PCL6::PHO85 cyclin                                                                                                                                                                                                    | 1                                                             | 0.685346638 | 0.993302576 |                           |
| 0.923487676 | 0.853878696                                                                                                                                                                                                                    | 1                                                             | 0.874309072 | 0.973105727 | 1.076132176               |
| 0.841611967 | 1                                                                                                                                                                                                                              | 0.969893209                                                   | 1.086757357 | 1.083391019 | 0.9470943 1               |

0.821572191 0.649894343 1.150332072 1.049406677 1 1.607046311  
3.087237001 3.052118843 1.247853465 1 1.062401931 1.124962663  
0.843078283 0.892717979 1.178281909 1 1.076131976 1.041804406  
1.07847955 0.999090013 0.902920194 1 1.162560386 1.114383375  
0.984830158 0.971157884 1.02585872 1.027982598  
YER061c YER061c::CEM1::homology with beta-keto-acyl synthases 1  
0.6600987 0.649740759 0.822913317 0.73568717 1 0.886962798  
0.887721282 0.697803228 0.715279221 1 0.955678767 1.057678295  
0.437111358 0.759498506 1 1.631308145 0.99690595 1.167812027  
0.715485418 1 2.203807728 3.940956221 0.923059036 1.341499131 1  
1.137807861 1.318485963 0.97976682 1.238243147 1.207936484 1  
0.88605034 0.886865494 0.925653495 1.271548299 1.321931822 1  
0.893537533 0.775864941 0.893290914 1.12964838 1.715596401 0.948300744  
YER063w YER063w::THO1::Suppressor of the Transcriptional (T) defect of Hpr1  
(H) by Overexpression (O) 1 0.76244112 0.899200588 0.708866904  
1.190750106 1 0.77351084 0.846580488 0.9962704 1.051393801 1  
0.681379537 1.014498974 1.067218509 0.826726229 1 1.496696756  
0.92266719 1.196930682 1.162212574 1 1.533969227 1.53443711  
1.35511624 0.981669495 1 1.059827064 1.214053663 0.999054606  
0.903806251 0.909772193 1 1.156595666 1.366128287 1.23965698  
0.869637865 1.338796384 1 1.053068387 1.352105499 1.049731178  
1.280662621 1.334918013 1.369475945  
YER077c YER077c::YER077C::molecular\_function unknown 1 0.675446173  
0.763547328 0.878943698 0.819608696 1 0.805693395 0.859587324  
0.876741336 1 0.696003898 0.698796754 0.635308511 0.80042083 1  
0.587092194 0.977351702 0.956838433 0.721256717 1 0.798905009  
1.478523354 0.40994567 0.681039788 1 0.945949088 0.956560298  
1.418172612 1.332331091 1.418032124 1 0.930975128 1.202089685  
0.896023492 1.157656026 0.934270618 1 1.362300234 1.183297096  
1.259272295 1.193334087 1.216763543 0.602429332  
YDR211W "YDR211W::GCD6::Guanine nucleotide exchange factor, 81 kDa subunit"  
1 0.650645485 0.56152228 0.757991317 0.503348757 1 0.699104016  
0.593358394 0.758501678 0.590952111 1 0.586241218 0.514973271  
0.292081346 0.790559103 1 0.897275709 0.658062107 0.592392009  
0.588082522 1 0.652080629 0.510470312 0.441100784 0.620502163 1  
0.930644019 0.790870844 1.045211713 1.113956541 1.159943891 1  
1.007100819 0.602498652 0.517754974 0.759578993 0.449537588 1  
0.750742853 0.666671573 0.945954203 0.708834415 0.511671588 0.749534149  
YER079w YER079w::YER079W::molecular\_function unknown 1 0.866641389  
1.284018195 0.89493954 1.487029911 1 1.029097907 1.158908073  
1.321609395 1.418597287 1 1.44178492 1.681802595 2.610051604  
1.238998149 1 2.279233574 1.008345008 1.362022194 1.270976786 1  
2.441673126 3.46390546 4.374247314 2.504005633 1 1.729759648  
2.685233686 1.580193848 0.778220589 1.12210168 1 1.646924789  
2.468035044 2.998136524 2.717553411 1.69934436 1 1.447559268  
1.629932523 1.374459374 1.133850225 1.7603921 0.882629006  
YDR213W YDR213W::UPC2::involved in sterol uptake 1 1.431253048  
1.284786566 1.266057666 1.121873413 1 1.254850345 1.33240597  
1.215440177 1.184091607 1 1.130719264 1.367070568 1.060757762  
1.231807345 1 1.018414099 0.850491113 1.017481973  
0.894575213 0.538131335 1 0.900246794 1.251565161  
1.120229638 1.087598749 1 0.670477215 0.971420894 0.759620471  
0.667778041 0.541034088 1 1.063230434 1.066088761 0.666668059  
0.935681911 0.942171402  
YDR215C YDR215C::YDR215C::molecular\_function unknown 1 1.308039342  
1.132681134 1.196754508 1.093292741 1 1.162402128 1.117258533  
1.131336552 1.159954743 1 1.077460444 1.321693091 1.405895275

|             |   |                                                                                                                                                                        |             |             |             |             |             |            |   |
|-------------|---|------------------------------------------------------------------------------------------------------------------------------------------------------------------------|-------------|-------------|-------------|-------------|-------------|------------|---|
| 1.218116738 | 1 | 1.454294058                                                                                                                                                            | 1.761900116 | 1.080223177 |             |             |             |            |   |
|             |   | 0.819425392                                                                                                                                                            | 0.987590231 | 0.728445062 | 0.825780513 | 1           |             |            |   |
|             |   | 1.732460318                                                                                                                                                            | 1.617842362 | 1.360998337 |             |             |             |            |   |
|             |   | 0.970745315                                                                                                                                                            | 1.242440931 | 1.011728957 | 1.198729219 |             |             |            |   |
| YDR217C     |   | "YDR217C::RAD9::Required for DNA damage-induced G2 arrest in mitosis, required for ionizing radiation-induced G1 arrest, and other cdc13-induced G2 arrest in meiosis" |             |             |             |             |             |            |   |
|             |   | 1.005961444                                                                                                                                                            | 0.917887301 | 0.977011087 |             |             |             |            |   |
|             |   | 0.809562782                                                                                                                                                            |             | 0.856258736 |             |             |             |            |   |
|             |   |                                                                                                                                                                        |             | 0.911867567 | 0.806271264 |             |             |            |   |
|             |   | 1.028511875                                                                                                                                                            | 0.91235124  | 0.842047355 | 1           | 1.115129682 | 1.321771595 |            |   |
|             |   | 0.833164674                                                                                                                                                            | 1.033747055 | 1           | 1.036208384 | 0.698430912 |             |            |   |
|             |   | 1.000895091                                                                                                                                                            | 0.808141338 | 1.01222136  |             |             |             |            |   |
| YDR219C     |   | YDR219C::YDR219C::molecular_function unknown 1 1.497652187                                                                                                             |             |             |             |             |             |            |   |
|             |   | 1.212801447                                                                                                                                                            | 1.25727715  | 1.123274219 | 1           | 1.184661601 | 1.180129639 |            |   |
|             |   | 1.208710448                                                                                                                                                            | 1.130299078 | 1           | 1.37357226  | 1.257944056 | 1.253957848 |            |   |
|             |   | 1.252959335                                                                                                                                                            | 1           | 1.357145384 | 1.259648165 | 0.685213703 |             |            |   |
|             |   |                                                                                                                                                                        |             | 1           | 1.02770123  | 0.925806905 | 1.236718591 | 1.11147498 |   |
|             |   | 1.024621286                                                                                                                                                            | 1           | 0.844297029 | 0.938219441 | 1.074576322 | 0.889502451 | 1          |   |
|             |   | 0.908288752                                                                                                                                                            | 0.881139479 | 1.022114153 | 1.059781189 | 3.112843378 |             |            |   |
| YDR221W     |   | YDR221W::YDR221W::molecular_function unknown 1 0.636958787                                                                                                             |             |             |             |             |             |            |   |
|             |   | 0.685856159                                                                                                                                                            | 0.800518118 | 0.599590249 | 1           | 0.701327542 | 0.74007011  |            |   |
|             |   | 0.794587884                                                                                                                                                            | 0.686066996 | 1           | 0.865462148 | 0.804541145 | 0.455250163 |            |   |
|             |   | 0.925976305                                                                                                                                                            | 1           | 0.896580963 | 0.693274415 | 0.78984967  | 0.907729466 | 1          |   |
|             |   | 1.677075                                                                                                                                                               | 0.848567688 | 0.729737218 | 1.025982374 | 1           | 0.99510338  |            |   |
|             |   | 1.214865288                                                                                                                                                            | 0.949235472 | 1.395277803 | 1.104032568 | 1           | 1.045103281 |            |   |
|             |   | 0.646084637                                                                                                                                                            | 1.240950978 | 1.161945652 | 0.483853156 | 1           | 0.810942286 |            |   |
|             |   | 0.69027684                                                                                                                                                             | 0.972758176 | 0.619992541 | 0.649266073 | 0.762668497 |             |            |   |
| YDR249C     |   | YDR249C::YDR249C::molecular_function unknown 1.031818505                                                                                                               |             |             |             |             |             |            |   |
|             |   | 0.91333202                                                                                                                                                             |             | 0.835402317 | 0.916050579 | 0.956635564 |             |            |   |
|             |   | 0.857405957                                                                                                                                                            |             | 0.939252708 | 1.005421654 |             |             |            |   |
|             |   |                                                                                                                                                                        |             | 1           | 1.162686903 |             |             |            |   |
|             |   | 1.279380974                                                                                                                                                            | 0.803079395 | 1           | 1.166775456 | 0.912706337 |             |            | 1 |
|             |   | 1.000921565                                                                                                                                                            | 0.99368328  | 0.856730362 | 1.271713582 | 0.691842321 | 1.073514981 |            |   |
| YDR251W     |   | YDR251W::PAM1::multicopy suppressor of protein phosphatase 2A 1                                                                                                        |             |             |             |             |             |            |   |
|             |   | 0.890825702                                                                                                                                                            | 0.898827469 | 1.052768062 | 0.740911142 | 1           | 1.060304895 |            |   |
|             |   | 1.239012366                                                                                                                                                            | 0.798644258 | 0.648596266 | 1           | 1.264403454 | 1.252226145 |            |   |
|             |   | 0.786487364                                                                                                                                                            | 0.835306224 | 1           | 2.115765337 | 1.674408316 | 1.596435377 |            |   |
|             |   | 0.978716049                                                                                                                                                            | 1           | 1.786373416 | 0.956826773 | 1.101753472 | 1.014794457 | 1          |   |
|             |   | 1.084521086                                                                                                                                                            | 1.062830887 | 1.108873141 | 1.048718134 | 1.091767425 | 1           |            |   |
|             |   | 1.200669811                                                                                                                                                            | 0.798201865 | 0.940760954 | 0.747969944 | 0.450942016 | 1           |            |   |
|             |   | 1.14277289                                                                                                                                                             | 0.819284166 | 0.909771654 | 0.717127038 | 1.004887262 | 0.826589061 |            |   |
| YDR253C     |   | YDR253C::MET32::Involved in methionine metabolism 1                                                                                                                    |             |             |             |             |             |            |   |
|             |   | 1.718269274                                                                                                                                                            | 1.624117881 | 1.082503127 | 1.706572538 | 1           | 1.157296745 |            |   |
|             |   | 1.038130872                                                                                                                                                            | 1.473531746 | 1.499412301 | 1           | 1.390667488 | 1.372354918 |            |   |
|             |   | 1.616421215                                                                                                                                                            | 1.193725383 | 0.286660526 | 0.227598103 | 0.29372234  |             |            |   |
|             |   | 0.177413562                                                                                                                                                            | 1           | 0.959879662 | 1.794804616 | 1           | 1.152958957 |            |   |
|             |   | 0.795420226                                                                                                                                                            | 0.82713421  | 0.890372438 | 0.969967949 | 1           | 0.992101312 |            |   |
|             |   | 0.985257006                                                                                                                                                            | 0.900111381 | 1           |             | 1.215886385 |             |            |   |
|             |   | 2.401852409                                                                                                                                                            | 1.436023347 |             |             |             |             |            |   |
| YDR255C     |   | YDR255C::RMD5::Required for Meiotic nuclear Division 1                                                                                                                 |             |             |             |             |             |            |   |
|             |   | 1.421628743                                                                                                                                                            | 1.308482325 | 1.281597103 | 1.392305904 | 1           | 1.182439884 |            |   |
|             |   | 1.105038826                                                                                                                                                            | 1.203050946 | 1.232646209 | 1           | 1.219696156 | 1.366469965 |            |   |
|             |   | 1.431081522                                                                                                                                                            | 1.185198941 | 0.673838363 | 0.621281294 | 0.420679249 |             |            |   |
|             |   | 0.603038514                                                                                                                                                            |             | 1           | 1.006619007 | 0.999814633 | 0.846574712 |            |   |
|             |   | 0.867547789                                                                                                                                                            | 0.973912613 | 1           | 1.055784757 | 1.07720448  | 1.233856965 |            |   |
|             |   | 1                                                                                                                                                                      | 0.880174876 | 1.098408428 | 0.694529055 | 1.071480573 | 0.832036349 |            |   |

YAL069W YAL069W::YAL069W::molecular\_function unknown 1 1.289274866  
1.273225552 0.981272114 1.126286702 1 1.157129046 1.12766301  
1.035358455 1.023305276 1 1.236322751 1.013434937 1.907748409  
1.00861797 1 0.926879608 0.841924727 0.956082 0.791341832 1  
0.961849924 1.074763869 0.829450879 0.939854862 1 0.879845526  
0.930095069 0.916527922 0.819594579 0.912409016 1 0.859059116  
1.204877723 1.62981949 0.691992115 0.711884895 0.94676342  
0.684421569 1.168193963 0.865992156  
YEL059CA "YEL059CA::SOM1::high copy suppressor of impl mutation, may be  
required for the function of the Impl peptidase and/or the protein sorting  
machinery" 1 1.455049065 1.908469327 1.537734708 2.315770076 1  
1.273719854 1.528644695 2.201351017 2.09935901 1 1.447070785  
1.722473003 2.737801541 2.029615264 0.833921562 0.632353638  
0.802625867 1.012220066 1 1.558860179 2.618343928 2.769985937 1  
0.917189884 0.995041241 1.183030887 0.897894205 0.979675951 1  
0.945893989 1.435376655 1.352012653 1.8277564 1.406722395 1  
0.8763655 0.942036664 1.139081366 1.099317292 1.619528876 1.113793689  
YFR024CA YFR024CA::LSB3::LAs17 Binding protein 1 1.606938618  
1.616897546 1.637739171 1.647099212 1 1.634454839 1.681834905  
1.793098122 1.487263574 1 1.830020103 2.191078146 1.779586269  
1.534828432 1 2.102558173 1.310178451 1.579737865 1.27766404 1  
1.639099589 1.357076815 1.24690756 1.307346875 1 1.495517791  
1.660326717 2.304131158 1.146401084 1.303855274 1 1.252291621  
1.691010723 2.19525287 1.039507873 0.731935605 1 1.346495178  
1.433402996 1.063888945 0.883322446 0.932002464  
YML017W YML017W::PSP2::Polymerase suppressor 2; Suppressors of group II  
intron-splicing defect. 1 2.082362523 1.60220753 1  
1.423591313 1.313933468 1 1.05052495 0.903702741  
1.294436113 1  
1.021235888 0.95910639 1.184124133 1.067200186 1.06754721 1  
1.022579507 0.968631196 0.806599043 0.713707602 1.048058797 1  
0.859448089 1.242876187 0.604728397 0.949170824 0.710680325 6.094343073  
YML021C YML021C::UNG1::uracil DNA glycosylase 1 1.230019846  
1.130210435 1.121862374 1.165457406 1 1.059284938 0.913181104  
1.379848544 1.174380205 1 0.92362903 0.8390873 0.886331516  
1.225140212 1 0.63681913 0.702061014 0.664378359 0.755544372 1  
0.829847889 0.505957446 0.431808998 0.742876748 1 1.977765016  
1.798293559 1.54032433 1.947863126 2.189948193 1 0.899449943  
0.877539188 0.880427463 0.888774952 0.96373628 1 1.093784441  
1.011205337 0.976291075 1.1177742 0.918104783 1.143564939  
YOL056W YOL056W::GPM3::converts 3-phosphoglycerate to 2-phosphoglycerate in  
glycolysis 1 1.312093493 1.66609701 1.294704218 1.812515621 1  
1.367668414 1.333939125 1.553917603 1.689150517 1 1.270399985  
1.375857249 1.441784086 1.601282467 1 0.831674572 0.360852964  
0.545535337 0.870895402 1 1.658356628 1.957619538 1.462406586  
1.018272735 1 1.205779414 1.290323458 1.031093583 1.231290528 1  
1.360413889 1.473707809 1.195024536 1.055630012 1.154137224 1  
1.918015851 1.57355799 1.134562254 1.294121787 1.449944532 0.954430189  
YMR254C YMR254C::YMR254C::molecular\_function unknown 1 1.294838195  
1.631485147 1.267033646 1.428633674 1 1.111835446 1.421308855  
1 1.122089119 1.494480108 1.490099024 1.260746829  
0.534725291 0.51161124 0.420264289 0.294613312 1  
0.925547505 0.80117225 1.185595126 1 0.893472599  
1.122500862 1 1.009725127 2.13872152  
YOL058W YOL058W::ARG1::arginosuccinate synthetase 1 2.353301699  
2.299819862 1.288723563 0.553780756 1 1.660196124 1.555163246  
0.736206417 0.576470923 1 2.822157172 3.656047598 0.537169566

0.323318433 1 3.373023484 3.118228352 1.347679376 1.382571582 1  
 3.498691575 1.817637014 0.947637779 1.21211875 1 1.047942175  
 0.979926995 1.146645865 1.194390065 0.987512329 1 2.082776734  
 2.56580565 2.504569472 3.782229161 2.49113056 1 3.140446322  
 2.494093218 3.877213361 1.408014503 1.543674156 1.127803701  
 YMR193CA YMR193CA::YMR193C-A::molecular\_function unknown 1 0.982272774  
 1.297210425 0.935416602 1.707418128 1 0.829742068 0.904180364  
 1.436550457 1.267069156 1 0.931144619 0.839558022 0.763307649  
 1.073218767 0.827406523 0.353084621 0.431438299 0.808675811 1  
 1.268693255 0.606300933 0.766112692 1.161341441 1 0.763284816  
 0.853309944 0.759596224 0.86534058 1.580048952 1 1.099664778  
 1.616259336 1.167344322 1.287384726 2.408420495 1 1.294467927  
 1.178911757 1.680629956 0.809076598  
 YOL060C YOL060C::MAM3::Product of gene unknown 1.170953906  
 1.145650956 1.079010861 1.31969356 1.463044843 0.792338027  
 0.825191327 1.44916969 1.261856338 0.868244504 0.969199119 1  
 1.335588875 1.127203975 1.108439706 1.02706242 1 0.822450512  
 0.887614265 0.676385226 0.424601348 1 1.116695762 1.159432697  
 1.118035914 1.132614564 0.796152781 1 1.118736749 0.734811284  
 0.79673239 0.968438151 0.671325055 1 1.449373756 1.072413437  
 1.158222704 0.783151833 1.039852607 0.80995221  
 YMR256C YMR256C::COX7::subunit VII of cytochrome c oxidase 1  
 1.272683693 2.274151015 1.283209881 2.743615382 1 1.548188718  
 1.462964109 2.170095493 1.866877664 1 1.273655032 1.448995447  
 2.686586896 1.205355298 1 1.444065355 0.697642342 0.709680064  
 1.435213238 0.875453554 0.699027169 1 0.667793616  
 0.508427254 0.296491486 0.505568873 0.823618154 1 0.849927381  
 0.661420361 0.477411823 0.809173017 2.053386237 1 0.71300792  
 0.50335599 0.726730422 1.799002927 1.799531287 1.935129073  
 YOL062C "YOL062C::APM4::Clathrin associated protein, medium subunit" 1  
 0.999287184 1.005334477 1.138693165 1.040885933 1 1.194003077  
 1.171065749 1.143826824 1.155436245 1 1.15016806 1.157630663  
 0.848074256 1.10966428 1 0.882949173 0.739578113 0.720662754  
 0.717882343 1 1.54982231 1.263187203 1.548688904 1.036976315 1  
 1.147249592 1.276691231 1.081864086 1.097309293 1.091759571 1  
 1.179101863 1.220476838 1.073792613 0.875452117 0.945461719 1  
 1.202274589 1.212762353 1.053207117 1.050629856 1.110496405 0.782807851  
 YPR132W YPR132W::RPS23B::Homology to rat S23 and E. coli S12 1  
 1.076723771 1.138890854 0.801721059 1.610309701 1 0.812499254  
 0.819463901 1.333757746 1.050974879 1 0.696079472 0.722703814  
 0.728346865 0.943266206 1 0.702857636 0.37090315 0.316456552  
 0.648238623 1 1.545408366 1.289553105 1.134952573 1.054608627 1  
 1.101234819 1.050744337 0.79022417 0.906014961 1.15650931 1  
 1.097635324 1.342528116 0.812518411 0.563004538 1.648113486 1  
 1.216897633 1.154546005 0.749894211 1.728152432 1.140084708 2.630374451  
 YER081w YER081w::SER3::catalyzes the first step in serine biosynthesis;  
 isozyme of SER33 1 1.113308417 1.117080092 0.927163843 0.816880167 1  
 0.991264721 0.849482635 0.836421797 0.751912169 1 1.365530462  
 1.485738837 0.885422386 0.620568445 1 2.058792164 0.981934757  
 0.62278268 0.730831913 1 2.806256382 2.127632706 1.735615514  
 1.195768918 1 0.992020497 1.048997545 1.43139881 1.051550572  
 1.333051431 1 0.972766114 1.120497087 1.098353365 0.933799485  
 1.369300076 1 0.855818703 0.937987243 1.261681656 1.420342745  
 3.02858576 0.965813311  
 YPR134W YPR134W::MSS18::Protein involved in splicing intron a15beta of COX1  
 1 1.094444298 1.398526336 1.136288412 1.628776855 1 1.076170183  
 1.229591125 1.730888172 1 1.102351196 1.2648971 1.75622327

|                                                       |                                                                                                                                                      |             |             |             |             |
|-------------------------------------------------------|------------------------------------------------------------------------------------------------------------------------------------------------------|-------------|-------------|-------------|-------------|
| 1.505435183                                           | 1                                                                                                                                                    | 1.241001989 | 0.710133853 | 0.852373636 | 1           |
| 1.595187678                                           | 1.762885948                                                                                                                                          | 2.038534721 | 1.624181683 | 1           | 1.140232289 |
| 1.380475671                                           | 1.197299173                                                                                                                                          | 1.001677492 | 1.267701151 | 1           | 1.029405927 |
| 1.659853438                                           | 1.589990779                                                                                                                                          | 1.187085587 | 1.602736933 | 1           | 1.381655266 |
| 1.148148629                                           | 1.08413156                                                                                                                                           | 1.828896439 | 4.927136121 |             |             |
| YOL064C                                               | YOL064C::MET22::Putative phosphatase gene involved in salt tolerance and methionine biogenesis; halotolerance                                        |             |             |             |             |
|                                                       | 1                                                                                                                                                    | 1.392888506 | 1.260335066 |             |             |
| 1.392956065                                           | 0.972455155                                                                                                                                          | 1           | 1.392269798 | 1.124158777 | 1.20616613  |
| 1.696379274                                           | 2.040789774                                                                                                                                          | 1.09524004  | 0.852345736 | 1           | 1.155231098 |
| 0.651357061                                           | 0.582713206                                                                                                                                          | 0.748580201 | 1           | 1.696558083 | 1.636576389 |
| 1.321363224                                           | 1.311200597                                                                                                                                          | 1           | 1.026486468 | 1.161502362 | 1.181014751 |
| 1.040104973                                           | 0.980989322                                                                                                                                          | 1           | 1.035294568 | 1.318981467 | 1.323908868 |
| 0.822451977                                           | 0.818501107                                                                                                                                          | 1           | 1.325006239 | 1.472458028 | 1.292400892 |
| 1.109760232                                           | 1.107330059                                                                                                                                          | 0.965813311 |             |             |             |
| YER083c                                               | YER083c::RMD7::Required for Meiotic nuclear Division                                                                                                 |             |             |             |             |
|                                                       | 1                                                                                                                                                    |             |             |             |             |
| 0.94589341                                            | 0.987521846                                                                                                                                          | 0.575723938 | 0.511400072 | 1           | 0.853876877 |
| 0.893186625                                           | 0.685200171                                                                                                                                          | 0.583175309 | 1           | 1.019255174 | 1.011531047 |
| 1.282192905                                           | 0.613399126                                                                                                                                          | 1           | 0.987313528 | 0.885008255 | 0.960791697 |
| 1.125805791                                           | 1                                                                                                                                                    | 1.064046578 | 1.697642682 | 1.526512519 | 0.868264142 |
| 1.401297602                                           | 1.1764567                                                                                                                                            | 1.27174466  | 1.133885041 | 1.086203531 | 1           |
| 0.856651992                                           | 1.11469079                                                                                                                                           | 0.930735065 | 0.936128885 | 0.816852181 | 1           |
| 0.781324067                                           | 0.864692993                                                                                                                                          | 0.806595028 | 0.802962839 | 0.634594782 | 1.838810316 |
| YOL066C                                               | YOL066C::RIB2::Riboflavin biosynthesis                                                                                                               |             |             |             |             |
|                                                       | 1                                                                                                                                                    | 1.148904214 |             |             |             |
| 1.155070255                                           | 1.152883247                                                                                                                                          | 0.956401328 | 1           | 1.109385791 | 1.141729209 |
| 0.982881111                                           | 1.469435433                                                                                                                                          | 1           | 0.996719616 | 0.845813926 | 1.202688905 |
| 1.074260635                                           | 1                                                                                                                                                    | 0.514589195 | 0.350120014 | 0.536462366 | 0.797724065 |
| 0.800467038                                           | 1.258504755                                                                                                                                          | 0.969809485 | 0.877661777 | 1           | 0.849977042 |
| 0.691418383                                           | 0.904068807                                                                                                                                          | 0.899718559 | 0.841261279 | 1           | 0.815207646 |
| 0.723385805                                           | 0.796228701                                                                                                                                          | 0.806549947 | 0.718917204 | 1           | 0.969243267 |
| 0.79780775                                            | 1.012125076                                                                                                                                          | 0.799300855 | 0.827570099 | 0.90539525  |             |
| YER085c                                               | YER085c::YER085C::molecular_function unknown                                                                                                         |             |             |             |             |
|                                                       | 1                                                                                                                                                    | 1.16466196  |             |             |             |
| 1.214247609                                           | 1.061415785                                                                                                                                          | 0.997566224 | 1           | 1.085299225 | 1.246490978 |
| 1.196656334                                           | 1.222150221                                                                                                                                          | 1           | 1.206839056 | 1.233652396 | 1.851862944 |
| 1.058146504                                           | 1                                                                                                                                                    | 1.009826226 | 1.30894811  | 1.458388187 | 1.012710894 |
| 1.04805354                                            | 1.801743389                                                                                                                                          | 1.815773268 | 0.645054746 |             | 0.644812462 |
| 0.854132103                                           |                                                                                                                                                      |             | 0.725347515 |             | 1           |
|                                                       | 0.770093974                                                                                                                                          | 1.097314926 | 0.370388959 |             |             |
| YOL080C                                               | YOL080C::REX4::RNA EXonuclease; member of 3'->5' exonuclease family.                                                                                 |             |             |             |             |
| See Moser et al. 1997 Nucleic acids Res. 25:5110-5118 | 1                                                                                                                                                    | 1.163923898 |             |             |             |
| 1.058229126                                           | 1.177032391                                                                                                                                          | 1.031508047 | 1           | 0.978040574 | 0.856424008 |
| 1.32827873                                            | 1.479591418                                                                                                                                          | 1           | 0.706548549 | 0.586960663 | 0.946326872 |
| 0.956866082                                           | 1                                                                                                                                                    | 0.229967808 | 1.03426647  | 0.326515102 | 0.576568881 |
| 0.987987207                                           |                                                                                                                                                      | 1.490373268 |             | 0.852521943 | 0.714231197 |
| 0.996181437                                           | 1.041302071                                                                                                                                          | 1.259243537 | 1           | 0.864065929 | 0.898405591 |
| 0.895880274                                           | 1.241510072                                                                                                                                          | 1.034511107 | 1           | 0.655795209 | 0.46385437  |
| 0.926459153                                           | 0.689850932                                                                                                                                          | 0.524774255 | 0.685613585 |             |             |
| YOL082W                                               | YOL082W::CVT19::Cytoplasm to Vacuole Targeting; Mutant is defective in import of aminopeptidase I through the cytoplasm to vacuole targeting pathway |             |             |             |             |
|                                                       | 1                                                                                                                                                    | 0.89225208  | 1.16091217  | 1.318298792 | 1.249972524 |
|                                                       | 1                                                                                                                                                    | 1.154741181 |             |             |             |
| 1.190379296                                           | 1.178439314                                                                                                                                          | 1.307718087 | 1           | 1.218159902 | 1.69223427  |
| 0.968632354                                           | 1.173133272                                                                                                                                          | 1           | 1.484427511 | 1.613458779 | 1.819597238 |
| 1.036108613                                           | 1.10927323                                                                                                                                           | 1.495042789 | 1.332826231 |             | 0.878770948 |
| 1.006918677                                           | 1.491241127                                                                                                                                          | 0.6932318   | 0.990362488 | 1           | 1.38610785  |
| 2.360450333                                           | 3.615746892                                                                                                                                          | 2.166248182 | 1.401125155 | 1           | 1.408067287 |
|                                                       |                                                                                                                                                      |             |             |             | 1.460706    |
| 1.435109235                                           | 0.779324854                                                                                                                                          | 2.063844474 | 1.305555433 |             |             |
| YER100w                                               | YER100w::UBC6::ubiquitin-conjugating enzyme                                                                                                          |             |             |             |             |
|                                                       | 1                                                                                                                                                    | 0.754997431 |             |             |             |
| 1.074303884                                           | 0.822125865                                                                                                                                          | 1.234063383 | 1           | 0.76926499  | 0.788293237 |

1.133505732 1.118414791 1 0.806168301 0.910734571 1.209361046  
1.097370032 1 1.179549656 0.813025615 0.8002819 1.554137958 1  
1.525674175 1.62972216 1.645751686 1.270405399 1 0.845596363  
1.065160834 0.763906571 0.719109234 0.772835467 1 1.065925253  
1.64073056 1.452464665 1.143168598 1 1.22879207 1.422712184  
0.964099156 1.514160884 1.34816743 1.273157293  
YOL084W YOL084W::PHM7 1 0.812250079 1.234645672 2.440905494  
1.498476603 1 1.366000934 2.62784914 1.65316093 1.564131149 1  
1.6216677 3.323545491 1.019959373 1.955434999 1 1.773928001  
5.796073411 1.769193754 1 2.108748502 3.475222086 4.880883651  
3.108589684 1 0.902981844 1.049597049 1.178962835 0.920550789  
0.972006752 1 0.712647341 0.813284923 1.193921876 0.725524323  
0.833291943 1 1.258877194 1.751616568 0.80995221  
YER102w YER102w::RPS8B::Homology to mammalian S8 1 1.17572635  
1.078484031 0.767097753 1.017677887 1 0.825329318 0.747786527  
1.059337736 1.125798836 1 0.798704602 0.699790983 0.628294993  
0.778441244 1 0.579953216 0.335233736 0.212020943 0.590637032 1  
1.067374859 0.699110941 0.498079324 0.751354622 1 1.051313025  
1.048851381 1.275588284 1.238714559 1.130442023 1 1.279065977  
1.651707892 0.857081957 0.579111577 1.218857196 1 1.006223036  
0.723990015 0.940514202 1.05091974 0.82674622 0.992957567  
YOL086C YOL086C::ADH1::Alcohol dehydrogenase 1 1.357956768  
0.894499217 0.618092041 0.365379968 1 1.151274305 0.992001304  
0.584515429 0.552429352 1 1.290745553 1.150170715 1.005879626  
0.491133367 1 0.889359811 0.500380856 2.134226543 2.256359426 1  
1.287211913 1.255749639 1.897355505 2.745446876 1 0.94239576  
0.830955948 1.505119823 1.255520097 1.269080937 1 1.046875965  
0.831082252 1.297473366 0.996997687 0.591484139 1 0.899339258  
0.58823615 1.059726156 0.51464849 0.763233033 1.06738564  
YER104w "YER104w::RTT105::same phenotype as RTT101, 102, 103, 104" 1  
1.288875033 1.442745823 1.187222846 1.50591379 1 1.373345877  
1.201953074 1.605337065 1 0.96498549 0.931254091 1.448281394  
1.532880093 1 0.733723379 0.688714426 1.130275184 1.303485199 1  
1.609311421 2.583606591 1.550522745 1.667443496 1 1.117169391  
0.951668769 0.965327421 1 1.032535864 1.2941658 1.332326859  
2.007518105 1 0.905744296 1.071154566 1.277552072 0.818504048  
1.405113887 1.081395653  
YER106w YER106w::MAM1::Monopolar microtubule Attachment during Meiosis I  
1 1.898559324 0.107103364  
1 0.653545722 0.611207486 0.780361238 0.982297172  
0.783764736 0.644833585  
0.897514579  
YER108c YER108c 1 0.696891603 0.717708012 0.90179893 0.642820228 1  
0.868451172 0.825495152 0.743300861 0.726917311 1 0.773583526  
0.700567858 0.426193564 0.915338751 1 0.594984819 0.464239474  
0.456743106 0.555603205 1 0.862633572 1.042748968 0.811324661  
0.614575254 1 0.931717502 1.028786147 0.946425524 0.967937852  
1.012413911 1 0.970908437 0.811680228 0.682971079 1.003943366  
1.030673563 1 0.842880376 0.801618744 1.150811074 0.782971665  
1.185132168 0.756539156  
YDR257C YDR257C::RMS1::Transcription regulator 1 0.757259504  
0.807856922 1.001496573 0.794809676 1 0.82144083 0.906949481  
1.014291048 0.740851937 1 0.816021789 0.863906672 0.580842132  
0.844203808 1 0.644830185 0.576818871 0.804940204 0.718118042 1  
1.737187355 1.140053046 0.918912592 1.036149616 1 0.952535259  
0.993405588 0.999591292 1.046458397 1 0.961522783 0.719280065



0.673107842 0.958678174 0.686721635 1 0.920692076 0.6955972  
 0.85144404 0.606878033 0.871548315 0.612061177  
 YER110c "YER110c::KAP123::Karyopherin of predicted MW 122.524 Da. Similar to  
 Kap95p (YLR347C) and Kap104p \*YBR017C). Ran binding protein, Homolog of  
 importin-beta" 1 1.038062798 0.52766632 0.778733033 0.408184804 1  
 0.920876026 0.661169247 0.487951685 0.484682862 1 1.028863025  
 0.402853987 0.123148065 0.768726416 1 0.468316263 0.201338374  
 0.110048467 0.268326049 1 0.254091044 0.137007104 0.037270969  
 0.216519611 1 0.82366639 0.443885986 0.663378849 1.282424507  
 0.580251268 1 0.657308558 0.268014465 0.230855869 0.513792662  
 0.330250521 1 0.677448435 0.350726262 0.581406579 0.574856028  
 0.307381068 0.469334476  
 YDR259C YDR259C::YAP6::bZIP protein 1 0.777895595 0.983344343  
 0.926279486 1 1.112567959 1.095163878 1 3.643941438  
 4.654140094 4.353367348 3.591947027 1 2.109974028  
 2.024900365 1 1.4714004 1 0.981684775  
 1.462265838 1.058996149 1.00978946 1 0.958294993 1.266495097  
 1.26710958 1.179297558 1 1.219454628 1.422352131 0.942102166  
 1.042535924 1.06475875  
 YDR283C YDR283C::GCN2::Derepression of GCN4 expression 1 1.299394803  
 1.203450599 1.632354056 1.423535092 1 1.532339668  
 1.248694851 1 1.366052428 1.390330738 1.413697931  
 1 0.871408384  
 0.820717057 0.743536209 0.861547059 1 1.028857014 0.916514479  
 0.956851245 1.378914543 1 0.950743067 1.163656954 -  
 0.007000298 1.183355593 0.612061177  
 YDR285W "YDR285W::ZIP1::Synaptonemal complex protein, component of the  
 central element" 1.376654265  
 0.905564837 0.415099345  
 0.723407305 0.293370089 0.288090494 0.809154039  
 0.768534815 0.930079587 1 1  
 0.701810699 0.645334878  
 YDR287W YDR287W::YDR287W::molecular\_function unknown 1 0.849876005  
 1.125996893 1.072765664 1.032545669 1 0.975177775 1.092918757  
 1.268429631 1.227672194 1 0.896569528 1.156593821 1.820015488  
 1.179197408 1 1.24551595 0.88007231 1.445532387 1.647507636 1  
 2.302834148 2.13011258 2.431473565 1.612841642 1 1.09365344  
 1.362458686 1.496866288 0.993614424 1.084677119 1 1.125366544  
 1.448260194 1.828169976 1.81908497 1.094732391 1 1.120938728  
 1.313073143 1.052275115 0.853103267 1.169834166 1.232878585  
 YDR289C YDR289C::RTT103::Regulator of Ty1 Transposition 1 0.646653599  
 1.051980821 0.881800678 0.918463607 1 0.787103717 0.859680329  
 1.163144286 0.95080645 1 0.847313718 1.178409196 1.217496298  
 1.028300892 1.098244831 0.820583415 0.923127327 0.789421627 1  
 2.226217286 2.708795944 2.857165642 1.369037207 1 1.01917186  
 1.146388425 1.029594133 0.680446493 1.087556017 1 1.237130415  
 1.255058523 1.296193627 1.05563144 1 1.389540087 1.078195693  
 0.925880475 0.752330535 1.200165035 0.970191427  
 YDR291W YDR291W::YDR291W::helicase 1 1.46941375 1.222512761  
 1.520512436 1.266346946 1 1.445604522 1.261617015 1.15530412 1  
 1.227909615 1.371195704 0.926411586 1.441759285  
 0.566949316 1 0.920897372 0.863409108  
 1.288769759 1.080283898 1 0.969175685 0.888660066 1  
 0.563451245 1.144391907 0.923935549 0.811361823 0.76879789  
 YDR293C YDR293C::SSD1::Product of gene unknown 1 0.772596211  
 0.78682512 1.099553856 0.639269241 1 1.054769167 1.13280712  
 0.696067796 0.625988032 1 1.072716669 1.022944164 0.59219803

|             |                                                                         |                                                                    |             |             |             |
|-------------|-------------------------------------------------------------------------|--------------------------------------------------------------------|-------------|-------------|-------------|
| 0.923323614 | 1                                                                       | 1.310377456                                                        | 1.648552636 | 0.588898425 | 1           |
| 0.708074186 | 0.785330436                                                             | 0.318951876                                                        | 0.837067985 | 1           | 0.78501872  |
| 0.779754431 | 0.966778863                                                             | 1.118552256                                                        | 0.804820289 | 1           | 0.785755327 |
| 0.432561288 | 0.613303937                                                             | 0.651006138                                                        | 0.335297304 | 1           | 0.586168619 |
| 0.578569443 | 1.02116557                                                              | 0.655738831                                                        | 0.678774505 | 0.677732966 |             |
| YDR307W     | YDR307W::YDR307W::molecular_function                                    | unknown                                                            | 1           | 0.924245607 |             |
| 0.809111504 | 0.936913249                                                             | 0.741682945                                                        | 1           | 0.833783349 | 0.858037118 |
| 0.859266266 | 0.669423145                                                             | 1                                                                  | 0.865000265 | 0.945364096 | 0.617075462 |
| 0.946775979 | 1                                                                       | 0.865750861                                                        | 0.945667592 | 0.889378562 | 0.960456162 |
| 1.192570417 | 1.02248376                                                              | 0.900101301                                                        | 1.312470013 | 1           | 1.323267223 |
| 1.873360031 | 1.432842972                                                             | 1.353192664                                                        | 1           | 1.074066869 | 0.891643703 |
| 1.099982678 | 0.973364581                                                             | 0.550303795                                                        | 1           | 0.950584781 | 1.027279631 |
| 0.800478597 | 0.88665508                                                              | 0.920280823                                                        |             |             |             |
| YDR309C     | YDR309C::GIC2::Gtpase-interacting                                       | component 2                                                        | 1           | 0.77449365  |             |
| 0.83048915  | 0.795734525                                                             | 0.842019149                                                        | 1           | 0.770826536 | 0.740484619 |
| 0.749273736 | 0.829612349                                                             | 1                                                                  | 0.708537312 | 0.636987562 | 0.529372886 |
| 0.446962856 | 0.448165352                                                             | 0.425334602                                                        | 1.000746165 | 1           | 0.76464913  |
| 1.01080455  | 0.419549889                                                             | 1.217777206                                                        | 1           | 1.137623517 | 0.831366672 |
| 1.098520088 | 0.852719313                                                             | 0.895859169                                                        | 1           | 0.898813209 | 1.014584721 |
| 0.83538106  | 0.806035181                                                             | 0.75604653                                                         | 1           | 0.803348427 | 0.770024828 |
| 0.994361261 | 0.790358353                                                             | 0.678705069                                                        | 0.759165994 |             |             |
| YPR198W     | YPR198W::SGE1::multi-copy                                               | suppressor of gal11 null; member of drug-resistance protein family | 1           | 0.985179032 | 0.733339518 |
| 0.67787746  | 1                                                                       | 0.811591436                                                        | 0.776229381 | 0.773849033 | 0.758990979 |
| 0.971530021 | 0.797273824                                                             | 0.667496171                                                        | 0.829387062 | 1           | 0.68046224  |
| 0.629624754 | 0.702553497                                                             | 0.669350514                                                        | 1           | 1.260708081 | 1.025624521 |
| 1.464782714 | 1                                                                       | 1.060260402                                                        | 1.158583994 | 1.312357293 | 1.200988275 |
| 0.940536133 | 1                                                                       | 0.909220071                                                        | 0.908031679 | 0.981705594 | 0.816434413 |
| 0.885316122 | 1                                                                       | 0.790246621                                                        | 0.815211066 | 0.833805796 | 0.954784465 |
| 0.663487724 | 0.864240878                                                             |                                                                    |             |             |             |
| YPR136C     | YPR136C::FYV15::Function required for Yeast Viability on toxin exposure | 1                                                                  | 0.889410344 | 0.937782343 | 1           |
| 1.035963466 | 0.97759776                                                              | 1                                                                  | 0.687994119 | 0.698544854 | 0.733164892 |
| 1.324418838 |                                                                         |                                                                    |             | 0.318981745 |             |
| 1           | 0.557759228                                                             | 0.557523518                                                        | 0.654494305 | 0.848319453 | 0.933093048 |
| 0.816759947 | 0.742899078                                                             | 0.66886164                                                         | 1.206875053 | 0.61351756  | 1           |
| 0.48426755  | 0.553940162                                                             | 1.054098422                                                        | 0.541310558 | 0.591464931 | 7.912138684 |
| YPR200C     | YPR200C::ARR2::Required for arsenate but not for arsenite resistance    |                                                                    |             |             |             |
| 1           | 1.048256556                                                             | 1.262114002                                                        | 1.256102154 | 1.484420685 | 1           |
| 1.152746291 | 2.485208319                                                             | 1.527132799                                                        | 1           | 2.445580652 | 4.310618397 |
| 3.624269224 | 1.689939801                                                             | 1                                                                  | 1.654218316 | 2.048577237 | 1.721570854 |
| 1.013096464 |                                                                         |                                                                    |             | 1           | 1.552889847 |
| 1.969577346 | 1.749358571                                                             | 1.27213928                                                         | 1           | 1.164554708 | 2.161653331 |
| 3.796434309 | 3.98111321                                                              | 0.784974063                                                        | 1           | 0.898003119 | 0.805480356 |
| 1.13277474  | 0.316587142                                                             | 0.879364787                                                        | 1.36597339  |             |             |
| YPR202W     | YPR202W::YPR202W::molecular_function                                    | unknown                                                            | 1           | 1.183408462 |             |
| 0.815856225 | 1.019942824                                                             | 0.654253039                                                        | 1           | 1.174886863 | 1.165038572 |
| 0.784870631 | 0.624175019                                                             | 1                                                                  | 1.157733668 | 0.893419058 | 0.610373314 |
| 0.843441947 | 1                                                                       | 0.814337802                                                        | 0.764503667 | 0.830321722 | 0.646434701 |
|             | 1.463282316                                                             | 1                                                                  | 0.867073196 | 0.920349041 | 1.072244031 |
| 1.258988826 | 1.028950598                                                             | 1                                                                  | 0.798469775 | 0.521514382 | 0.810525176 |
| 1.161699165 | 0.491104517                                                             | 1                                                                  | 0.69855985  | 0.508072638 | 0.847325903 |
| 0.474722689 | 0.690861021                                                             | 0.971066988                                                        |             |             |             |
| YOL088C     | YOL088C::MPD2::protein disulfide isomerase related protein              | 1                                                                  |             |             |             |
| 0.89013364  | 1.233108785                                                             | 1.11943622                                                         | 1           | 0.814685183 |             |
| 1.240007566 | 1.050073317                                                             | 1                                                                  | 0.91266315  | 1.046191871 | 1.232030436 |
| 1.084924447 | 0.716264275                                                             | 1.012402839                                                        | 1.764715624 | 1           | 1.348016485 |

|             |                                                                                                                                                                                                                        |             |             |             |                         |
|-------------|------------------------------------------------------------------------------------------------------------------------------------------------------------------------------------------------------------------------|-------------|-------------|-------------|-------------------------|
| 1.389354062 | 1.946208146                                                                                                                                                                                                            | 1.836276078 | 1           | 1.18634914  | 1.191349949             |
| 1.136431233 | 0.91391514                                                                                                                                                                                                             | 0.976535444 | 1           | 0.763878118 | 1.039018154             |
| 1.069244431 | 0.870765987                                                                                                                                                                                                            | 1.222898237 | 1           | 1.119929913 | 1.167199604             |
| 1.416817032 | 1.231677369                                                                                                                                                                                                            | 1.217199128 | 1.261774171 |             |                         |
| YOL090W     | "YOL090W::MSH2::Functions with Pms1p and Pms2/Mlh1p in a complex that interacts with Pms3p/Msh6p to repair single-base and insertion-deletion mispairs, or Msh3p to repair insertion-deletion mispairs." 1 0.931945653 |             |             |             |                         |
| 0.887123645 | 1.138709861                                                                                                                                                                                                            | 0.834717247 | 1           |             | 0.985780356             |
| 0.883040932 | 1                                                                                                                                                                                                                      | 0.921408705 | 0.894070198 | 0.724148703 | 1.10877236 1            |
| 0.657635066 | 0.465043478                                                                                                                                                                                                            | 0.509304074 | 0.717800559 | 1           | 0.946430033             |
| 1.280219097 | 0.983316289                                                                                                                                                                                                            | 1.116077304 | 1           | 0.856571508 | 0.858468853             |
| 0.943227724 | 0.782041702                                                                                                                                                                                                            | 0.953660824 | 1           | 1.250143472 | 1.139918482             |
| 1.271068741 | 1.076497872                                                                                                                                                                                                            | 0.67606391  | 1           | 1.027776507 | 1.295446295             |
| 1.16077247  | 0.907111653                                                                                                                                                                                                            | 1.04467256  | 1.063883189 |             |                         |
| YOL104C     | YOL104C::NDJ1::Involved in meiotic chromosome segregation; may stabilize homologous DNA interactions at telomeres and is required for a telomere activity in distributive segregation; is associated with telomeres 1  |             |             |             |                         |
| 0.885548329 | 0.966524661                                                                                                                                                                                                            | 1.14118963  | 0.54258669  | 1           |                         |
| 0.850796399 | 0.69722766                                                                                                                                                                                                             | 1           | 0.978620803 | 0.980858614 | 0.645985689 1           |
| 0.762349251 | 1.315346513                                                                                                                                                                                                            | 1.418300855 | 0.727084482 | 1           | 0.725549313             |
| 0.982074215 | 0.983185676                                                                                                                                                                                                            | 0.572605229 | 1           | 1.089247213 | 1.291247244             |
| 1.232242577 | 1.218462101                                                                                                                                                                                                            |             | 0.893297117 | 1.063960644 |                         |
| 1.685601258 | 1                                                                                                                                                                                                                      | 0.863604546 | 1.225365897 | 0.120633847 | 1.51360977              |
| YOL106W     | YOL106W::YOL106W::molecular_function unknown 1 1.201079051                                                                                                                                                             |             |             |             |                         |
| 1.483087588 | 1.120345144                                                                                                                                                                                                            | 1.430573906 | 1           | 1.016017173 | 0.977181681             |
| 1.618517803 | 1.413453891                                                                                                                                                                                                            | 1           | 1.250602813 | 1.342765846 | 2.529007877             |
| 1.230466941 | 1                                                                                                                                                                                                                      | 1.225335784 | 0.964509455 | 1.168109096 | 0.814164888 1           |
| 1.043997022 | 2.327732989                                                                                                                                                                                                            | 1.376448921 | 0.949217778 | 1           | 0.692584921             |
| 0.601681489 | 0.661621609                                                                                                                                                                                                            | 0.634922332 | 0.945939756 | 1           | 1.19570686              |
| 2.158234601 | 2.292117428                                                                                                                                                                                                            | 3.100086146 | 3.414247628 | 1           | 1.109262634             |
| 2.622630088 | 2.077666748                                                                                                                                                                                                            | 2.061830671 | 1.496479509 | 1.705715512 |                         |
| YER124c     | YER124c::DSE1::Daughter Specific Expression 1 1 0.898187508                                                                                                                                                            |             |             |             |                         |
| 0.673463896 | 1.01743661                                                                                                                                                                                                             | 0.819465054 | 1           | 0.942685172 | 0.936172696             |
| 0.858766934 | 0.82195254                                                                                                                                                                                                             | 1           | 0.728297569 | 0.805626485 | 0.497995953             |
| 0.918184579 | 1                                                                                                                                                                                                                      | 0.819423716 | 0.808875334 | 0.880172238 | 1.153680454 1           |
| 1.00346853  | 0.40796941                                                                                                                                                                                                             | 0.73805649  | 1.962073964 | 1           | 0.973145665             |
| 1.031387477 | 1.321040685                                                                                                                                                                                                            | 1.027890057 | 1.2707819   | 1           | 0.990490684             |
| 0.935909737 | 1.512191418                                                                                                                                                                                                            | 0.454044783 | 0.506544707 | 1           | 1.275346432             |
| 1.106003762 | 1.404905069                                                                                                                                                                                                            | 0.899759917 | 1.070851041 | 0.840599021 |                         |
| YOL108C     | YOL108C::INO4::Transcription factor required for derepression of inositol-choline-regulated genes involved in phospholipid synthesis 1                                                                                 |             |             |             |                         |
| 0.970787856 | 1.336178981                                                                                                                                                                                                            | 1.181592686 | 1.176616688 | 1           | 1.062417819             |
| 1.137758733 | 1.325856763                                                                                                                                                                                                            | 1.226221138 | 1           | 1.132187886 | 1.15611692              |
| 1.229733693 | 1.14003887                                                                                                                                                                                                             | 1           | 1.241539622 | 1.01111653  | 1.115524579             |
| 1.321605021 | 1                                                                                                                                                                                                                      | 1.622062538 | 1.249994925 | 1.74980648  | 0.808433354 1           |
| 0.923264384 | 0.765403226                                                                                                                                                                                                            | 0.648964402 | 0.958928699 | 0.851826343 | 1                       |
| 0.707998324 | 0.54972227                                                                                                                                                                                                             | 0.558120287 | 0.738717984 | 1.098416733 | 1                       |
| 0.601218791 | 0.542616726                                                                                                                                                                                                            | 0.741191987 | 0.556557292 | 0.857070904 | 0.87825089              |
| YER126c     | YER126c::NSA2::Killer toxin Resistant; Nop seven associated protein 2 1 0.780827259 0.573014376 0.728451992 0.877966194 1 0.633531339                                                                                  |             |             |             |                         |
| 0.564087117 | 0.842079751                                                                                                                                                                                                            | 1.130943147 | 1           | 0.417791249 | 0.286629452             |
| 0.234059172 | 0.970260612                                                                                                                                                                                                            | 1           | 0.276331141 |             | 0.197347224 0.772140126 |
| 0.392324293 | 0.372366932                                                                                                                                                                                                            | 0.201115964 | 1.246942649 | 1           | 0.629044645             |
| 0.484250601 | 0.731531714                                                                                                                                                                                                            | 1.063138154 | 1.022860356 | 1           | 0.595659546             |
| 0.556133481 | 0.543710366                                                                                                                                                                                                            | 0.960321399 | 0.843647242 | 1           | 0.557744322             |
| 1.010052458 |                                                                                                                                                                                                                        | 0.526364235 | 0.942171402 |             |                         |

YOL112W YOL112W::MSB4::Multicopy Suppressor of Bud Emergence 1  
0.986686047 0.984858414 0.963372948 0.947708672 1 0.93504916  
0.926259927 0.939200123 1.124828403 1 0.859788642 0.968194179  
1.016869433 1.156228283 1 1.059464903 0.765462199 0.812703802 1  
1.579936364 1.121291568 0.963586546 0.788296061 1 0.848872485  
0.865377134 1.16029805 0.839789053 1.177989668 1 1.197789124  
1.243922977 1.391544636 1 0.693787851 0.93232452  
0.815444978 0.768818113 2.766096146  
YER128w YER128w::YER128W::molecular\_function unknown 1 0.77773493  
1.13802224 0.924962836 1.359135992 1 0.900618011 0.912135264  
1.182444054 1.337477867 1 1.034701579 0.858017364 1.698544673  
1.082936427 0.677561234 2.508500182 0.716553405 1.2473962 1  
1.15658039 1.341549346 2.023093595 1.501943707 1 1.056473741  
1.001776977 0.64937697 0.866169665 1.027934279 1 0.968505074  
1.306366252 1.597612842 1.684650517 1.855635249 1 0.964760912  
1.075451729 1.234517583 0.922037539 1.296664088 1.106788787  
YOL114C YOL114C::YOL114C::molecular\_function unknown 0.824962311  
0.915336017 0.797869727 0.684292014 1.018909612 0.894576776  
0.648630001 0.875789686 1.092609213 0.4253372  
0.34382475 0.414443459 1.018004834  
0.844632562 0.865812621 1.275510323 0.790101417 1.088021236  
1.371707878 1 1.447482305 1.436815867 1.137444623 1.322025008  
1.393993415  
YER130c YER130c::YER130C::molecular\_function unknown 1 0.732149467  
0.823970787 1.001877993 1.006038335 1 0.865510404 1.045269512  
1.079818635 1 0.829627533 1.01398744 1.060846191 0.719883148 1  
1.051227311 0.622366426 1.014383609 1 2.194070719 1.703273316  
2.271764183 1 1.043884528 0.997147183 1.067873573 0.863180332  
1.233099406 1 1.312563534 1.264576734 1.46905175 1.088303471  
1.132635589 1 1.438580506 1.096790068 1.039466501 0.591619738  
1.103218624 0.944798293  
YOR058C YOR058C::ASE1::essential for anaphase spindle elongation 1  
1.597613232 1.558415064 1.442549085 1.691224612 1 1.481476464  
1.517689214 1.445052078 1.159049461 1 1.357649238 1.34895697  
1.288278911 1.322336008 0.880457317 0.612669475 0.537953  
0.522710984 1 1.211229594 0.969922177 0.90438696  
1.066414691 1.099651171 1 0.777956882 0.806972782 0.774155257  
0.841806149 0.908116377 1 0.765491666 0.907547344 0.793762748  
0.937597434 1.024643731 1.574371933  
YER132c YER132c::PMD1::Paralog of MDS3 1 1.474880965 1.449983065  
1.465020586 1.430292769 1 1.355523028 1.301619336 1.449510081  
1.433034212 1 1.356678166 1.208288372 1.04233267 1.424751187 1  
0.94792034 1.011779305 0.691922677 0.690351025  
0.572919629 1 1.12133141 0.79879098 0.996934227 1.078076507  
1.017670407 1 0.909634106 0.917242148 0.877842087 0.959255995  
1.046983888 1 0.837026787 0.945436074 0.823814171 0.921325807  
0.83621625 0.90276836  
YER132c YER132c::PMD1::Paralog of MDS3  
1.173110412 0.969763028 1 1.605735659  
0.815000679  
YOR060C YOR060C::YOR060C::molecular\_function unknown 1 0.921573341  
0.949076628 1.211656735 1.041995714 1 0.993925305 1.090742231  
1.182237345 0.826351548 1 1.154926318 1.180906575 0.497519625  
1.201645132 1 1.232756963 0.658702893 0.644628375  
0.648440997 1.616944652 0.95885222 1 0.92881527

|         |                                                                                                                                     |             |             |             |             |             |             |
|---------|-------------------------------------------------------------------------------------------------------------------------------------|-------------|-------------|-------------|-------------|-------------|-------------|
|         | 0.744102261                                                                                                                         | 0.784285216 | 1.080328964 | 1           | 0.828850812 | 0.975166484 |             |
|         | 1.121277274                                                                                                                         | 0.954156871 | 0.985468779 | 1           | 0.850562613 | 0.949341813 |             |
|         | 0.618695898                                                                                                                         | 0.863011868 | 0.92816139  |             |             |             |             |
| YER134c | YER134c::YER134C::molecular_function unknown                                                                                        |             |             | 1           | 1.0407661   |             |             |
|         | 1.254176803                                                                                                                         | 1.289205583 | 1           | 1.101996303 | 0.92708038  | 1.136193001 |             |
|         | 1.271947519                                                                                                                         | 1           | 1.279020223 | 1.250378624 | 1.148080555 | 1.001403329 |             |
|         | 1.220168666                                                                                                                         | 1.039569735 |             |             | 0.913584892 |             | 1           |
|         | 1.01585542                                                                                                                          | 1.262238558 | 0.652521153 | 0.904160894 | 1.181524529 | 1           |             |
|         | 1.071952163                                                                                                                         | 1.413334042 | 1.500137537 | 1.007049356 | 1.307410738 | 1           |             |
|         | 1.174077697                                                                                                                         | 1.333695033 | 0.989929634 | 0.97565922  | 1.543137934 | 1.145316164 |             |
| YOR062C | YOR062C::YOR062C::molecular_function unknown                                                                                        |             |             | 1           | 1.63872186  |             |             |
|         | 1.569464892                                                                                                                         | 1.814824563 | 1           | 1.241414516 | 1.304409602 | 1.366909724 |             |
|         | 1.362150456                                                                                                                         | 1           | 1.38050634  | 1.434372221 | 1.879179341 | 1.511099721 | 1           |
|         | 1.085623009                                                                                                                         | 1.016026747 | 0.771778032 | 0.902470756 | 1           | 0.990279386 |             |
|         | 1.011414028                                                                                                                         | 1.156620046 | 1.210827114 | 1           | 1.149164108 | 1.029749641 |             |
|         | 1.029512577                                                                                                                         | 1.010300235 | 1.144023014 | 1           | 1.13033295  | 1.135206979 |             |
|         | 1.515819914                                                                                                                         | 1.069141662 | 0.90514692  | 1           | 1.278202317 | 0.909229637 |             |
|         | 1.165665411                                                                                                                         | 0.935910673 | 1.174508537 | 1.172460524 |             |             |             |
| YER148w | YER148w::SPT15::TATA-binding protein (TBP)                                                                                          |             |             | 1           | 0.986014257 |             |             |
|         | 0.858071458                                                                                                                         | 0.807218723 | 1.280858512 | 1           | 0.768450353 | 0.745047402 |             |
|         | 0.852031568                                                                                                                         | 0.98761281  | 1           | 1.019169144 | 0.937315859 | 0.500966114 |             |
|         | 1.179140657                                                                                                                         | 1           | 0.718333781 |             | 0.532551924 | 0.912488641 | 1           |
|         | 1.619060826                                                                                                                         | 1.057458331 | 1.124194787 | 1.49503436  | 1           | 1.183601829 |             |
|         | 1.022894454                                                                                                                         | 0.771315654 | 0.867194986 | 0.926107358 | 1           | 1.004942471 |             |
|         | 1.204901531                                                                                                                         | 0.934823303 | 0.959375368 | 1.542771253 | 1           | 1.145104541 |             |
|         | 1.351617182                                                                                                                         | 0.968994251 | 1.367423074 | 1.018737907 | 1.844939867 |             |             |
| YER150w | "YER150w::SPI1::Stationary Phase Induced; strongly expressed during stationary phase, and transcription is dependent on MSN2/MSN4." |             |             | 1           |             |             |             |
|         | 1.284024289                                                                                                                         | 1.827602058 | 2.061660334 | 1           | 1.43944491  | 2.134861697 |             |
|         | 1.768829769                                                                                                                         | 1.948197296 | 1           | 1.616840064 | 2.266126908 | 2.648239385 |             |
|         | 1.581035819                                                                                                                         | 1           | 2.686299565 | 3.141936044 | 6.812712751 | 5.70661361  | 1           |
|         | 4.047785382                                                                                                                         | 20.92698452 | 7.064002436 | 1           | 1.246122727 | 1.680455936 |             |
|         | 0.851294765                                                                                                                         | 0.720261889 | 0.87209087  | 1           | 0.859554882 | 1.134928848 |             |
|         | 2.058750792                                                                                                                         | 1.439137028 | 2.14315054  | 1           | 0.84477175  | 1.033083268 |             |
|         | 1.015556262                                                                                                                         | 0.807430714 | 2.479047297 | 1.196102433 |             |             |             |
| YER152c | YER152c::YER152C::molecular_function unknown                                                                                        |             |             | 1           | 0.803239056 |             |             |
|         | 0.667799174                                                                                                                         | 0.627310409 | 0.347702692 | 1           | 0.810889345 | 0.850291168 |             |
|         | 0.634056746                                                                                                                         | 1           | 1.067896095 | 0.999746995 | 0.993560403 | 0.864307227 | 1           |
|         | 0.840149659                                                                                                                         | 0.894451426 | 1.014073395 | 1.063406499 |             | 0.789305195 |             |
|         | 0.478597735                                                                                                                         | 0.575482443 | 0.506604434 | 1           | 1.046914025 | 1.048182864 |             |
|         | 1.547309375                                                                                                                         | 1.469683926 | 1.254566451 | 1           | 0.862381833 | 0.845985996 |             |
|         | 0.90128584                                                                                                                          | 0.831295538 | 0.588578159 | 1           | 0.844928008 | 0.879741105 |             |
|         | 1.345887957                                                                                                                         | 0.593613593 | 1.127030507 | 0.907146476 |             |             |             |
| YDR311W | "YDR311W::TFB1::Component of transcription initiation factor IIb, 75 kDa subunit"                                                   |             |             | 1           | 0.803592111 | 0.930908974 | 1.069122095 |
|         | 0.947963253                                                                                                                         | 1.054711825 | 0.975908631 | 1           | 0.844094286 | 0.84098008  |             |
|         | 0.759393797                                                                                                                         | 1.171222202 | 1           |             | 0.67507869  | 1.137338811 |             |
|         | 0.399309275                                                                                                                         | 0.632911937 | 0.817790864 | 0.539218455 | 1           | 1.070251386 |             |
|         | 1.048166955                                                                                                                         | 1.142356515 | 1.240472234 | 1.287625891 | 1           | 0.910291924 |             |
|         | 1.016753534                                                                                                                         | 0.923670743 | 0.8382478   | 0.909620765 | 1           | 0.781495437 |             |
|         | 0.847092954                                                                                                                         | 0.787884941 | 0.721554386 | 0.679484244 |             |             |             |
| YER154w | YER154w::OXA1::Mediates the export of proteins from the mitochondrial matrix to the intermembrane space.                            |             |             | 1           | 0.951307781 | 0.935380404 | 0.796016283 |
|         | 0.748259829                                                                                                                         | 1           | 1.012262019 | 0.941568224 |             | 0.904864231 | 1           |
|         | 0.97806079                                                                                                                          | 0.978700851 | 1.27796096  | 0.80860539  | 1           | 0.916768223 |             |
|         | 1.197200904                                                                                                                         | 1.06138084  | 1.052284554 | 1           | 0.83959806  | 1.259184418 |             |
|         | 0.876919288                                                                                                                         | 1.041615071 | 1           | 0.890784779 | 0.936496523 | 1.034858837 |             |

|         |                                                                                                             |             |             |             |             |             |             |             |
|---------|-------------------------------------------------------------------------------------------------------------|-------------|-------------|-------------|-------------|-------------|-------------|-------------|
|         | 0.950277752                                                                                                 | 0.860641133 | 1           | 0.797000922 | 0.928897583 | 0.904976879 |             |             |
|         | 0.819457464                                                                                                 | 0.894873099 | 1           | 0.93706408  | 1.063572631 | 1.023155977 |             |             |
|         | 0.779101311                                                                                                 | 1.115499413 | 1.162828628 |             |             |             |             |             |
| YDR313C | YDR313C::PIB1::Phosphatidylinositol(3)-phosphate binding                                                    |             |             |             |             |             | 1           |             |
|         | 1.090995499                                                                                                 | 0.981065224 | 0.999908645 | 1.240469777 | 1           | 0.839620045 |             |             |
|         | 0.950731062                                                                                                 | 1.102079418 | 1.3694602   | 1           | 0.868195738 | 0.976206823 |             |             |
|         | 1.284400606                                                                                                 | 1.184336898 | 1           |             | 1.246486299 | 1.455375334 |             |             |
|         | 0.716778349                                                                                                 | 0.705117465 | 0.625102037 | 1           | 1.154957816 | 1.115871674 |             |             |
|         | 1.013352818                                                                                                 | 1.164550542 | 1.040524814 | 1           | 1.05762288  | 1.151602818 |             |             |
|         | 0.930673396                                                                                                 | 0.907862192 | 1.105762617 | 1           | 1.031707346 | 0.974011206 |             |             |
|         | 1.04214213                                                                                                  | 1.285707159 | 1.152348711 | 0.986828225 |             |             |             |             |
| YDR315C | YDR315C::IPK1::inositol polyphosphate kinase                                                                |             |             |             |             |             | 1           | 0.891482763 |
|         | 1.24804894                                                                                                  | 1.126634887 | 1.452865502 | 1           | 0.980719866 | 1.142462687 |             |             |
|         | 1.172115535                                                                                                 | 1           | 1.049451043 | 1.309135824 | 1.372998331 | 1.165046826 | 1           |             |
|         | 0.839550768                                                                                                 | 0.559804814 | 0.903289533 | 1.641628084 | 1           | 1.34335299  |             |             |
|         | 2.098734113                                                                                                 | 2.725296623 | 1.596040004 | 1           | 1.071332981 | 1.280938557 |             |             |
|         | 0.897691225                                                                                                 | 0.854057312 | 1.126980313 | 1           | 1.038607858 | 1.494505047 |             |             |
|         | 1.30758286                                                                                                  | 1.312692271 | 1.522702035 | 1           | 1.438019288 | 1.306720831 |             |             |
|         | 1.290420349                                                                                                 | 1.07996763  | 1.761925319 | 2.009557147 |             |             |             |             |
| YDR317W | YDR317W::YDR317W::molecular_function unknown                                                                |             |             |             |             |             | 1           | 1.427152821 |
|         | 1.58487235                                                                                                  | 1.065480226 | 1.70398721  | 1           | 1.203305821 | 1.255686211 |             |             |
|         | 1.323861992                                                                                                 | 1.372258861 | 1           | 1.26835096  | 1.325224432 | 1.888823278 |             |             |
|         | 1.442660991                                                                                                 | 1           | 1.16721353  | 0.524645668 | 0.908586829 | 1.952419974 | 1           |             |
|         | 1.596747012                                                                                                 | 2.875735866 | 2.181014787 | 1.831245183 | 1           | 1.12611994  |             |             |
|         | 1.188365047                                                                                                 | 0.861136345 | 1.050245057 | 1.189289565 | 1           | 0.719552485 |             |             |
|         | 1.272697986                                                                                                 | 1           | 1.364904328 | 1           | 0.924158725 | 0.810339716 |             |             |
|         | 0.717906083                                                                                                 | 1.099160212 | 1.070888195 |             |             |             |             |             |
| YDR331W | YDR331W::GPI8::Protein involved in the attachment of glycosylphosphatidylinositol (GPI) anchors to proteins |             |             |             |             |             | 1           | 0.788905354 |
|         | 0.796607943                                                                                                 | 0.906958641 | 0.866918716 | 1           | 0.800959956 | 0.832894648 |             |             |
|         | 0.90119332                                                                                                  | 0.853795504 | 1           | 0.811943462 | 0.673760753 | 0.665238124 |             |             |
|         | 0.84945196                                                                                                  | 1           | 0.599767172 | 0.386173136 | 0.526046873 | 0.571565727 | 1           |             |
|         | 0.812207273                                                                                                 | 0.739947869 | 0.738130491 | 0.687687659 | 1           | 0.898575377 |             |             |
|         | 0.791732876                                                                                                 | 0.876635832 | 1.043198313 | 0.890133501 | 1           | 0.798893432 |             |             |
|         | 0.855322084                                                                                                 | 0.684412578 | 0.719828134 | 0.550858518 | 1           | 1.052609239 |             |             |
|         | 0.859751362                                                                                                 | 1.028540347 | 0.938390986 | 0.83831202  | 0.916778372 |             |             |             |
| YDR333C | YDR333C::YDR333C::molecular_function unknown                                                                |             |             |             |             |             | 1           | 0.889616198 |
|         | 0.839373051                                                                                                 | 1.046436617 | 0.753835473 | 1           | 1.046191986 | 1.03752714  |             |             |
|         | 0.935465565                                                                                                 | 0.82311043  | 1           | 0.940065118 | 1.029888686 | 0.645974253 |             |             |
|         | 0.920951313                                                                                                 | 1           | 1.070533986 | 0.884649241 | 0.783930425 | 0.642459497 | 1           |             |
|         | 1.390223542                                                                                                 | 0.960215457 | 0.843965361 | 1.191161575 | 1           | 0.80247792  |             |             |
|         | 0.943671538                                                                                                 | 0.992708861 | 0.715326165 | 1.069448818 | 1           | 1.248941561 |             |             |
|         | 0.995367302                                                                                                 | 1.031902457 | 1.294505038 | 1           |             | 0.702811886 |             |             |
|         | 0.791825687                                                                                                 |             | 0.985016612 | 0.569155579 |             |             |             |             |
| YDR335W | YDR335W::MSN5::Multicopy suppressor of snf1 mutation                                                        |             |             |             |             |             | 1           |             |
|         | 0.903826235                                                                                                 | 0.875709105 | 1.166261882 | 0.704940601 | 1           | 1.069440744 |             |             |
|         | 1.195499767                                                                                                 | 0.947158956 | 0.764591537 | 1           | 1.119659685 | 1.205708443 |             |             |
|         | 0.665013545                                                                                                 | 1.033934051 | 1           | 1.519324217 | 0.983822111 | 1.173524825 | 1           |             |
|         | 1.387244445                                                                                                 | 1.128107885 | 1.094834751 | 1.022373406 | 1           | 1.094918916 |             |             |
|         | 0.993405519                                                                                                 | 1.02745868  | 0.955765326 | 1           | 1.154042746 | 0.759689969 |             |             |
|         | 0.884544485                                                                                                 | 0.992785789 | 0.642294521 | 1           | 0.841328889 | 0.734045606 |             |             |
|         | 0.810474301                                                                                                 | 0.606952043 | 0.746490392 | 0.867743381 |             |             |             |             |
| YDR337W | YDR337W::MRPS28::Mitochondrial ribosomal protein MRPS28 (E. coli S15)                                       |             |             |             |             |             | 1           |             |
|         | 1                                                                                                           | 0.788545826 | 1.218144175 | 1.141144969 | 1.580240359 | 1           | 0.964732273 |             |
|         | 1.124736132                                                                                                 | 1.355258487 | 1.367765632 | 1           | 0.926263619 | 1.096377512 |             |             |
|         | 1.249964319                                                                                                 | 1.177940139 | 1           | 1.093209059 | 0.753074351 | 1.20719053  | 1           |             |
|         | 1.839537952                                                                                                 | 2.219366979 | 2.415628626 | 1.240314387 | 1           | 0.86279775  |             |             |

1.157440072 0.750721833 0.777845826 0.914652553 1 1.254997411  
1.289793579 1.047030948 0.910466541 1.194160389 1 1.351371831  
1.244587485 1.059956448 1.365869867 1.57456472 0.908897701  
YDR339C YDR339C::YDR339C::molecular\_function unknown 1 0.830549005  
1.041280064 0.792690577 1.301995393 1 0.691749809 0.661142748  
1.260868929 1.26430816 1 0.586318823 0.692247415 0.732416944  
0.97651655 1 0.450296814 0.467350839 0.928419649 1  
1.019393845 1.119657374 0.99530441 1.210414326 1 0.803620154  
0.893435275 0.640855976 0.707589431 0.894057486 1 0.867015871  
1.37478875 0.861821514 1.207976339 2.300278212 1 0.922212834  
0.993708771 0.986587212 1.837041272 0.95359274 1.192599878  
YDR341C YDR341C::YDR341C::arginine-tRNA ligase 1 1.27728917  
1.238505178 1.32402116 1.092907368 1 1.221032041 1.223462868  
1.083630798 1.04597158 1 1.273360215 1.317477281 0.819387775  
1.291867537 1 0.935739661 0.503461982  
1 1.086165937 1.041749561 1.049606092 1.224698814 1.084141004 1  
0.890337555 0.801868414 0.714782375 0.725494327 0.843511477 1  
0.990619582 0.901879923 0.993845498 0.979982477  
YOR064C YOR064C::YNG1::Yeast homolog of mammalian Ing1 1 1.49065798  
1.560867288 1.291332317 1.986807989 1 1.435564582 1.332980208  
1.522424812 1.638211592 1 1.328677158 1.15635327 1.339272844  
1.267100856 1 0.431845305 0.58823519 0.681090351 1  
1.422667677 1.126759649 1.306286451 1 0.741654658 0.688397169  
0.677511514 0.821797555 0.917101633 1 0.728533517 0.721059072  
0.719572043 1.032259859 1.65132179 1 0.793052449 0.65355159  
1.010038624 0.97477929 1.426138846 1.635665659  
YOR066W YOR066W::YOR066W::molecular\_function unknown 1 0.99133314  
0.931342678 1.102529211 0.763329607 1 1.188694454 1.214354164  
0.801827706 0.803556769 1 0.779348429 1.069801124 0.871601641  
0.928028944 1 0.72441425 0.872998318 0.609854102 1  
0.936640183 0.645801135 1 0.966025856 1.069471274  
1.125194372 1.271547303 1.409243586 1 0.722023563 0.709671751  
0.608284254 0.996387394 1.028557613 1 0.746562851 0.647100564  
0.866557174 0.700364429 0.811946224 0.825713448  
YOR068C YOR068C::YOR068C::molecular\_function unknown 1  
1.700213271 0.946090498 1 1.550055696 1.40638041 1  
1.416889019 1.531874877 1.083959445 1 0.447383309  
0.620771035 1 0.964036019 1.047224612  
0.755514783 0.979306674 0.725227165 1.078394719 1  
0.653674107 1.280018727 1.05391852 1 0.681251744  
1.047646367 1.044753147 0.944798293  
YOR082C YOR082C::YOR082C::molecular\_function unknown 1  
2.154481548 1 1.455281907 1.199570251 1.248625752 1  
1.379077229 1.559903467 1.469469684 1 0.463961056  
0.965125568 0.73985323 1 0.543017018 0.352746755 0.591061475 1  
0.742228679 1.117178455 1  
1 0.118005023 1.811407228 0.890509573  
YER156c YER156c::YER156C::molecular\_function unknown 1 0.982092869  
0.675430994 0.616089404 0.485228051 1 0.816398064 0.702322213  
0.705346208 0.723684722 1 0.445279705 0.335297145 0.631869311 1  
0.356196771 0.1493726 0.247355709 0.56380428 1 0.408666371  
0.146326564 0.244700738 0.499761641 1 0.472523865 0.166000646  
0.20044115 1.319857389 1.020463818 1 0.168941914 0.083792976  
0.065718499 0.145568579 0.864479903 1 0.175642483 0.104067294  
0.403242747 0.763921914 0.552358522 0.802071592  
YOR084W YOR084W::YOR084W::molecular\_function unknown 1 1.211021085  
1.067426589 1.088111637 0.859894897 1 1.126432871 1.120926054

|             |                                                                                                                                                                                                                                                                                         |             |             |             |               |
|-------------|-----------------------------------------------------------------------------------------------------------------------------------------------------------------------------------------------------------------------------------------------------------------------------------------|-------------|-------------|-------------|---------------|
| 1.019873723 | 1.041064589                                                                                                                                                                                                                                                                             | 1           | 1.056201613 | 1.048865034 | 1.196602214   |
| 1.055655741 | 1                                                                                                                                                                                                                                                                                       | 0.941080055 | 1.430044728 | 0.693437735 | 1             |
| 0.783981314 | 0.941701468                                                                                                                                                                                                                                                                             | 0.787931676 | 0.597284999 | 1           | 1.039229063   |
| 1.001398402 | 1.097983618                                                                                                                                                                                                                                                                             | 1.230490645 | 1.441128675 | 1           | 0.856629344   |
| 0.817162533 | 0.692705671                                                                                                                                                                                                                                                                             | 1.002389881 | 0.778408237 | 1           | 0.597224006   |
| 0.590383156 | 0.81496725                                                                                                                                                                                                                                                                              | 0.703107655 | 0.733820689 | 1.027982598 |               |
| YER158c     | YER158c::YER158C::molecular_function unknown                                                                                                                                                                                                                                            |             |             |             | 1 1.008267918 |
| 0.921703967 | 0.917749107                                                                                                                                                                                                                                                                             | 0.882748782 | 1           | 0.89690073  | 0.926627776   |
| 0.873032359 | 1                                                                                                                                                                                                                                                                                       | 1.32820864  | 1.058498864 | 1.05259807  | 1.124199286 1 |
| 1.162293967 | 0.850868897                                                                                                                                                                                                                                                                             | 1.228655068 | 1.262447058 | 1           | 0.856976737   |
| 0.986013452 | 0.853491638                                                                                                                                                                                                                                                                             | 0.851900893 | 1           | 1.493995185 | 1.676752414   |
| 1.766025927 | 1.554146018                                                                                                                                                                                                                                                                             | 1.192967901 |             | 0.978117274 | 0.945629214   |
| 1.513212843 | 1.456689113                                                                                                                                                                                                                                                                             | 1.045047283 | 1           | 1.46903058  | 1.592051491   |
| 1.314135067 | 0.840069747                                                                                                                                                                                                                                                                             | 1.660183471 | 0.941295842 |             |               |
| YOR086C     | YOR086C::YOR086C::molecular_function unknown                                                                                                                                                                                                                                            |             |             |             | 1 1.470878173 |
| 1.463418995 | 1.900540926                                                                                                                                                                                                                                                                             | 1.500253518 | 1           | 1.83475861  | 1.685126352   |
| 1.503662465 | 1                                                                                                                                                                                                                                                                                       | 1.635691064 | 1.63537392  | 1.381993082 | 1.679048528 1 |
| 1.293430784 | 1.51498379                                                                                                                                                                                                                                                                              | 1.607599318 | 0.735775485 | 1           | 0.914344377   |
| 1.25419501  | 0.472801448                                                                                                                                                                                                                                                                             | 1           | 0.922139116 | 0.931562336 | 0.995724374   |
| 1.285395507 | 0.973562132                                                                                                                                                                                                                                                                             | 1           | 0.871877097 | 0.501736774 | 0.719392782   |
| 0.788543225 | 0.360908398                                                                                                                                                                                                                                                                             | 1           | 0.861203227 | 0.679441809 | 1.174730945   |
| 0.708887214 | 0.884406422                                                                                                                                                                                                                                                                             | 0.728519183 |             |             |               |
| YER172c     | YER172c::BRR2::RNA helicase-related protein required for pre-mRNA splicing; Snurp 246 kDa protein (Snurp = Small nuclear ribonucleoprotein particle) 1 1.069232938 0.791581053 1.1807236 0.736400778 1                                                                                  |             |             |             |               |
| 1.09288163  | 1.057359751                                                                                                                                                                                                                                                                             | 0.734261093 | 0.747976367 | 1           | 1.402827172   |
| 1.282082832 | 0.723243906                                                                                                                                                                                                                                                                             | 1.081319375 | 1           | 1.30041882  | 1.742870701   |
| 1.25323299  | 0.830274256                                                                                                                                                                                                                                                                             | 1           | 0.529220633 | 0.520828998 | 0.402913638   |
| 0.897533199 | 1                                                                                                                                                                                                                                                                                       | 0.843786354 | 0.679525064 | 0.924680524 | 1.197790461   |
| 0.924131078 | 1                                                                                                                                                                                                                                                                                       | 0.612295294 | 0.616328619 | 0.742185762 | 0.818626309   |
| 1.14699858  | 1                                                                                                                                                                                                                                                                                       | 0.677851899 | 0.880508466 | 1.038498956 | 1.011861216   |
| 0.828081767 | 0.713633558                                                                                                                                                                                                                                                                             |             |             |             |               |
| YOR088W     | YOR088W::YOR088W::molecular_function unknown                                                                                                                                                                                                                                            |             |             |             | 1 1.720722857 |
| 1.233037117 | 1.683185042                                                                                                                                                                                                                                                                             | 1.151265511 | 1           | 1.616125542 | 1.583006648   |
| 1.287858605 | 1.173618078                                                                                                                                                                                                                                                                             | 1           | 1.472284755 | 1.697031151 | 1.123906619   |
| 1.345310536 | 1                                                                                                                                                                                                                                                                                       | 1.091365898 | 1           | 1.146669043 |               |
| 0.694413861 | 0.523929581                                                                                                                                                                                                                                                                             | 1           | 1.092625996 | 1.168147626 | 1.048071891   |
| 1.061966394 | 1.055838084                                                                                                                                                                                                                                                                             | 1           | 1.081274347 | 1.337166864 | 0.960703808   |
| 0.866995373 | 1.013079627                                                                                                                                                                                                                                                                             | 1           | 1.428485486 | 1.384525655 | 1.195643716   |
| 1.519714931 | 1.163101078                                                                                                                                                                                                                                                                             | 1.045495061 |             |             |               |
| YER174c     | "YER174c::GRX4::Member of a glutaredoxin subfamily in Sc together with GRX3 & GRX5. Significant sequence diff. with the other glutaredoxin subfamily, formed by the previously described GRX1 & GRX2 glutaredoxins (Luikenhuis MBC 9:1081, 1998)" 1 1.018580669 0.944294716 0.846908849 |             |             |             |               |
| 1.182971038 | 1                                                                                                                                                                                                                                                                                       | 0.885329731 | 0.841526162 | 1.085063815 | 1             |
| 0.81261845  | 0.559053167                                                                                                                                                                                                                                                                             | 0.930429571 | 1.032984591 | 1           | 0.947552789   |
| 0.388645388 | 0.698276856                                                                                                                                                                                                                                                                             | 1.064651722 | 1           | 1.405730654 | 1.140501232   |
| 1.75647004  | 1                                                                                                                                                                                                                                                                                       | 0.630258047 | 0.450358792 | 0.343932174 | 0.970473964   |
| 0.9461224   | 1                                                                                                                                                                                                                                                                                       | 0.458750904 | 0.453836068 | 0.397563259 | 0.335694428 1 |
| 0.57202733  | 0.52856737                                                                                                                                                                                                                                                                              | 0.64059213  | 1.729511169 | 1.4011862   | 1.099783781   |
| YOR090C     | YOR090C::PTC5::Phosphatase type Two C                                                                                                                                                                                                                                                   |             |             |             | 1 1.078937372 |
| 0.995262728 | 1.324153439                                                                                                                                                                                                                                                                             | 0.815743631 | 1           | 1.281830383 | 1.42073859    |
| 0.991655392 | 0.973403059                                                                                                                                                                                                                                                                             | 1           | 1.153135124 | 1.247673963 | 0.813477684   |
| 1.20259227  | 1                                                                                                                                                                                                                                                                                       | 1.523646011 | 1.227555644 | 1.133949245 | 1.172611894 1 |
| 1.249702013 | 1.079362384                                                                                                                                                                                                                                                                             | 1.610282525 | 1           | 1.149874843 | 1.18776747    |
| 1.360754948 | 1.213285104                                                                                                                                                                                                                                                                             | 1.331682605 | 1           | 1.19758357  | 0.95323768    |



1.029147692 1.175422829 0.814723456 1 0.738006587 0.790209336  
0.815071719 0.656313388 0.655614344 0.691742979  
YER176w "YER176w::ECM32::DNA Helicase; identified as an ExtraCellular  
Mutant; homology exists between ECM32 and two other identified DNA helicases,  
DNA2 and NAM7" 1 0.910592109 0.79419534 0.882898327 0.846089963 1  
0.902831613 0.961836047 0.811842411 1 1.017631773 0.808241661  
1.008925847 1.195212429 1.047986259 0.757840156 1.010275745  
1.096645281 0.869974379 0.620753492 1 0.856855211 0.928686866  
1.021346639 0.907152268 0.968221302 1 1.157849138 0.845864954  
1.125440201 1.161989341 1 1.049853746 0.866305814 0.949749161  
0.601957284 0.733061177 0.726767905  
YOR092W YOR092W::ECM3::ExtraCellular Mutant 1 1.354835814 0.838887615  
1.272812147 0.873253076 1 1.234666863 1.158026187 0.907393794  
0.777224408 1 1.325218915 0.843669261 0.641565673 1.147083646 1  
0.85819576 0.781141326 0.895353869 0.397905876 1.058227779  
1.563298653 1 1.091180931 1.121755153 1.160717104 1.147769877  
0.710571351 1 0.930383628 0.962394695 1.275685615 1.002832689  
0.878835296 1.047646462 1.04999453 1.0843986 1.122204697  
1.071726835 0.679484244  
YER178w YER178w::PDA1::alpha subunit of pyruvate dehydrogenase (E1 alpha) 1  
1.498411688 1.037490033 1.24879842 0.95242249 1 1.286835347  
1.316907272 0.949277882 1.05074265 1 1.292267022 1.205101217  
1.378711299 0.8059971 1.938681377 1.685944736 1.485322979 1  
0.989185784 0.682234548 0.984718488 1.147849713 1 1.158936309  
0.972239763 1.665442672 1.472168077 0.983002253 1 1.547943817  
1.446999594 2.206060064 1.619787253 1.070543738 1 1.034572797  
0.833147614 1.060611285 0.754313569 1.008845805 0.738151027  
YOR106W YOR106W::VAM3::Syntaxin-related protein; required for vacuolar  
assembly; PEP12 homolog 1 0.672952806 0.830556172 0.893473617 0.879936583 1  
0.796411486 0.770031655 1.029500698 1.109310318 1 0.75580151  
0.741523051 0.780027088 1.067528375 1 0.885630166 0.619194017  
0.564774963 0.78277249 1 1.53719186 0.967703873 1.558529617  
1.375375431 1 1.152205144 1.189494453 1.061319981 1.017390098  
1.247494984 1 0.978067223 1.052629173 1.108477168 1.036591093  
1.307604246 1 0.997828651 0.983035559 1.023697057 0.933735893  
1.167566833 1.17596308  
YER180c YER180c::ISC10::Meiosis-specific protein required for spore  
formation 1 0.869461323 0.821759608 0.797697323 1.081863452 1  
0.702000177 0.683776119 0.929600996 0.896320725 1 0.697949764  
0.704601229 1.01208293 0.876362928 1 0.797945184 2.543208589  
1.185709654 1.346205435 1 1.861849128 1.490808644 1  
1.004666514 0.854616421 0.596294563 0.656857318 1.009384128 1  
0.798548532 1.090645932 0.824881256 0.863740617 1.916330669 1  
1.020316813 1.267865648 1.12876328 1.296777598 1.710981655 1.578750049  
YER182w YER182w::YER182W::molecular\_function unknown 1 0.995219879  
1.113922866 1.107724645 1.395058665 1 0.899927881 0.880282881  
1.592074771 1.281153678 1 0.883770014 0.857339077 0.564849327  
1.236605308 1 0.780530202 1.621039986 1.202662183 1  
0.764507051 1.231259212 1 0.642652121 0.485039988  
0.208185858 0.686616263 0.904834657 1 0.765175603 0.515673968  
0.478280272 0.483829719 1.192720927 1 0.715627883 0.518198188  
0.779880565 1.265844726 1.82989104 1.320441006  
YFL004W YFL004W::VTC2::Phosphate metabolism; transcription is regulated by  
PHO system 1 1.063240633 0.789894212 1.033207056 0.752696135 1  
0.963764777 0.961257205 0.783456919 1 1.012089985 0.941260813  
0.458755032 0.897785107 1 1.133770248 0.832665516 0.9780609  
0.648402487 1 0.875035979 0.644937792 0.628563998 0.759923817 1

|         |                                              |             |             |             |             |             |             |             |  |
|---------|----------------------------------------------|-------------|-------------|-------------|-------------|-------------|-------------|-------------|--|
|         | 1.047160016                                  | 0.932948718 |             | 0.994990698 | 0.837278706 | 1           |             | 1.093904174 |  |
|         | 0.845984015                                  | 1.117120595 | 0.934886425 | 0.648087454 | 1           |             | 0.943330101 |             |  |
|         | 0.966325715                                  | 0.836027022 | 0.580645046 | 0.768362117 | 0.716260448 |             |             |             |  |
| YDR355C | YDR355C::YDR355C::molecular_function unknown |             |             |             |             |             |             | 0.87051993  |  |
|         | 1.48601603                                   | 1.049454794 |             | 1.089655171 |             |             | 0.875991403 |             |  |
|         |                                              | 1.785675937 | 1           |             |             |             | 0.66021534  |             |  |
|         |                                              | 1           | 0.975162134 | 0.915669556 |             |             | 0.780589904 | 1.210145406 |  |
|         | 0.775973043                                  | 0.642589725 |             | 1.40311402  | 1.154783583 | 1           |             |             |  |
|         | 1.692874901                                  |             |             |             |             |             |             |             |  |
| YFL006W | YFL006W::YFL006W::molecular_function unknown |             |             |             |             |             | 1           | 1.152323202 |  |
|         | 1.080334255                                  | 0.972627824 | 0.961005758 | 1           | 0.881716222 |             | 1.027941547 |             |  |
|         | 1.437505989                                  | 1.429999323 | 1           | 1.043593722 | 0.991010572 |             | 2.504512229 |             |  |
|         | 1.134051727                                  | 1           | 1.184464239 | 1.16641375  | 2.351897767 |             | 1.727940641 | 1           |  |
|         | 0.712330191                                  | 1.798304632 | 1.690282638 | 0.640816378 | 1           |             | 1.207360078 |             |  |
|         | 1.241292383                                  | 1.13819404  | 1.054092502 | 0.761150643 | 1           |             | 1.108912274 |             |  |
|         | 1.396862714                                  | 1.463228652 | 0.824808255 | 1.086894868 | 1           |             | 1.001021662 |             |  |
|         | 1.527434252                                  | 0.937573641 | 0.802906165 | 0.980918956 | 0.783683463 |             |             |             |  |
| YDR357C | YDR357C::YDR357C::molecular_function unknown |             |             |             |             |             |             | 0.704296197 |  |
|         | 1.11148638                                   | 0.758102958 | 1.13951995  |             | 0.670743336 |             | 0.709554802 |             |  |
|         | 1.274957808                                  |             | 0.635368076 | 0.996369384 | 1.417470627 |             | 1.030875391 | 1           |  |
|         | 1.212073308                                  | 0.791660527 | 1.200597162 | 1.882363388 | 1           |             | 1.896537576 |             |  |
|         | 2.536451673                                  | 3.531595794 | 1.427650445 |             | 0.933551519 |             | 0.95169467  |             |  |
|         | 0.719352125                                  | 0.849330168 | 1.202788075 | 1           | 0.849941676 |             | 1.183343257 |             |  |
|         | 1.011692885                                  | 1.46204496  | 2.42626921  | 1           | 1.019353695 |             | 1.465398504 |             |  |
|         | 1.484165675                                  | 1.276851209 | 2.110749937 | 1.431645232 |             |             |             |             |  |
| YDR359C | YDR359C::VID21::Vacuolar import degradation  |             |             |             |             |             |             | 1.019505647 |  |
|         | 0.841586528                                  | 1.151690348 | 0.799817645 |             | 1.101762512 |             | 1.046758056 |             |  |
|         | 0.891711511                                  | 0.753327784 |             | 1.001880156 | 1.190989391 |             | 1.01619057  | 1           |  |
|         | 1.147831287                                  |             | 0.906453967 | 1           | 0.82634738  |             | 1.520641866 |             |  |
|         | 0.711642598                                  | 1.056884014 | 1           | 0.809026186 | 0.847902302 |             | 0.966635932 |             |  |
|         | 0.90336103                                   | 0.792655163 | 1           | 0.730592561 | 0.663564197 |             | 1.072596509 |             |  |
|         | 1.161467404                                  | 0.826530432 | 1           | 0.819580032 | 0.678615927 |             | 1.183283709 |             |  |
|         | 0.571640265                                  | 1.055252629 | 0.922907714 |             |             |             |             |             |  |
| YDR361C | YDR361C::BCP1::Hypothetical ORF              |             |             |             |             |             | 0.954247396 | 0.852974697 |  |
|         | 0.833018775                                  | 0.976032072 |             | 0.679218395 | 0.831475206 |             | 0.93050851  |             |  |
|         | 0.745080541                                  | 0.904348055 | 1.040023723 | 0.860531339 |             |             | 0.707344151 |             |  |
|         | 0.605735103                                  |             |             |             | 1           |             | 1.032783926 |             |  |
|         | 0.990358317                                  |             | 1.08662548  | 1           | 1.552698272 |             | 1.083378372 |             |  |
|         | 1.462444196                                  | 0.767002687 | 1.28390249  |             | 1.113550502 |             | 1.254001629 |             |  |
|         | 0.98951376                                   | 0.551853436 | 0.774090273 | 0.960559531 |             |             |             |             |  |
| YDR363W | YDR363W::ESC2::Establishes Silent Chromatin  |             |             |             |             |             |             | 0.765860488 |  |
|         | 0.865501669                                  | 1.367492613 | 0.876177236 |             | 1.108267376 |             | 1.138157856 |             |  |
|         | 1.020957425                                  |             | 1.01634777  | 1.129641713 | 0.668419783 |             | 0.841930554 | 1           |  |
|         | 0.634139005                                  | 0.527649709 | 0.541743406 | 0.719738267 | 1           |             | 1.610790343 |             |  |
|         | 1.002358292                                  | 1.294551878 | 1.358821894 |             | 1.169792498 |             | 0.871911313 |             |  |
|         | 0.998641622                                  | 1.252545463 | 1           |             | 0.686417575 | 0.955718911 | 1.261177834 |             |  |
|         | 0.947777733                                  | 1           | 0.887086367 |             | 1.271533574 | 0.584628511 | 1.549942469 |             |  |
|         | 0.952678964                                  |             |             |             |             |             |             |             |  |
| YDR365C | YDR365C::YDR365C::molecular_function unknown |             |             |             |             |             | 1           | 1.016064132 |  |
|         | 0.896329102                                  | 1.039961875 | 1.041182854 | 1           | 0.90803842  |             | 0.852867859 |             |  |
|         | 1.013376665                                  | 0.98832501  | 1           | 0.914433607 | 0.593840357 |             | 0.69816285  |             |  |
|         | 1.413507303                                  |             | 2.028030072 |             | 1.299694388 | 1.129120451 | 1           |             |  |
|         | 0.679149557                                  |             | 0.693995604 | 1           | 0.862967787 | 0.854074679 | 0.361517209 |             |  |
|         | 0.679310617                                  | 0.879303926 | 1           | 0.951877124 | 0.632079512 |             | 0.658319103 |             |  |
|         | 0.85739349                                   | 1.287248983 | 1           | 0.578818873 | 0.58644006  |             | 0.754706213 |             |  |
|         | 1.064454779 0.394006651 0.600678055          |             |             |             |             |             |             |             |  |

YDR379W "YDR379W::RGA2::contains a Rho-GAP domain and two LIM domains, similar to Rgalp and all known Rho-GAPs" 1 0.634510443 0.792212599  
0.98685731 0.817055386 1 0.899456204 0.937058842 0.788130567 1  
0.965342745 1.021889029 1.02072459 0.510973732 0.748295683  
0.716011341 0.679972623 1 1.508255836 1.918518093 1.574963217  
1 1.272480825 0.844078497 0.867553482 1.194250405 1  
1.075996333 0.881422871 1.388456668 1.262029418 1.083669543 1  
1.094189906 1.051330109 1.222560941 0.783934949 1.527554833 1.365097829  
YDR381W YDR381W::YRA1::Yeast RNA Annealing Protein 1 1.450914114  
1.752253285 1.269545055 2.242461849 1 1.226591427 1.223506276  
1.92920378 1.660711335 1 1.315078268 1.298826565 1.587515445  
2.132485517 1 1.087418126 0.969025084 0.864790151 1  
2.29639438 3.309769697 2.612896681 1.104112529 1 0.986428497  
1.263967294 0.827156302 0.821852694 1.12597049 1 1.294423218  
1.789035091 1.166855913 0.758473153 2.07228263 1 1.178873586  
1.435199271 0.918988017 1.411013966 1.592320169 1.510451421  
YDR383C YDR383C::NKP1::Non-essential kinetochore protein 1  
1.077623782 1.111783988 1.358192628 1 0.7388903 0.67787102  
1.086822504 1.096553868 1 0.988926617 0.797028255 0.769340823  
0.787652525 1 0.538865656 1.100316697 1 1.934630023  
2.248825293 1.467363065 1.129900177 1 0.857136989 1.023066935  
0.696255668 0.670806644 1.021793578 1 0.990172003 1.256575195  
1.292442383 1.09776279 2.151725298 1 1.047273991 1.294507427  
1.127505781 0.540284666 1.441636825 0.911524592  
YDR385W YDR385W::EFT2::translation elongation factor 2 (EF-2) 1  
1.008052799 0.598804133 1.136329635 0.504970278 1 1.202495537  
1.118777325 0.5622413 0.810558455 1 1.08807098 0.751304209  
0.663853199 0.891053693 1 0.697767131 0.384651192 0.475953122  
0.262716834 1 0.428986533 0.166755418 0.118266162 0.297415509 1  
0.936074559 0.624807078 0.884569586 1.605708298 0.856066673 1  
0.73455386 0.299662743 0.470348366 0.435169742 0.181179787 1  
0.745393851 0.349791025 0.454498618 0.354624512 0.535177545 0.455324463  
YOR108W YOR108W::YOR108W::molecular\_function unknown 1 1.220547401  
0.845931953 1.222394013 0.53679804 1 1.135854582 0.989049757  
0.750365415 0.631625164 1 1.305641297 0.891716109 0.435516409  
0.676043853 1 0.8222375 0.882003242 0.704376515 0.318652501 1  
0.429597766 1 0.76488883 0.570237432 0.67377808  
1.092677785 0.823291109 1 0.758236381 0.336570723 0.319015134  
0.485177646 0.57205681 1 0.674111669 0.306600438 0.647440736  
0.641744413 0.436775878 0.577036198  
YOR110W YOR110W::TFC7::Transcription factor for RNA polymerase III 1  
1.83463257 1.900631772 1.61218341 1.719755109 1 1.54400024  
1.479537329 1.438984497 1 1.505994232 1.361266046 1.538107139  
0.911292385 1  
1.109501453 1.115827767 1.122192625 0.921304296 1.224121218 1  
1.183145775 1.115877189 1.292284935 0.951967446 0.964671352 1  
1.069678525 0.876601536 1.089285723 0.93733316 1.104972571 3.414933684  
YOR112W YOR112W::YOR112W::molecular\_function unknown 1 1.387021572  
1.428716074 1.616736133 1.40039231 1 1.57871727 1.572904739  
1.486431097 1.210278145 1 1.575793223 0.962931816 1.441209894  
1.429579788 0.738081882 1  
1.000327245 0.978890921 1.033772531 0.954719898 0.948372103 1  
1.062150092 0.685083258 0.894517367 0.852652952 0.596867011 1  
1.049387973 0.821505206 1.002923934 0.765264181 0.893224874  
YOR114W YOR114W::YOR114W::molecular\_function unknown 1  
1.297312403 1.139023314 1.578861232 1 1.060293973 1.138897977  
1.55579736 1.491328393 1 1.147055001 1.06264532 1.345937108

|             |                                                                                    |             |             |             |             |             |             |
|-------------|------------------------------------------------------------------------------------|-------------|-------------|-------------|-------------|-------------|-------------|
| 1.748991415 | 1                                                                                  | 0.853379718 | 0.69840734  | 0.973549475 | 1.239727798 | 1           |             |
| 1.526044266 | 1.690890359                                                                        | 1.795427446 | 2.223759095 | 1           | 1.048766793 |             |             |
| 1.202611112 | 1.310246571                                                                        | 0.977505686 | 1.478434788 | 1           | 1.348469648 |             |             |
| 1.884700795 | 1.677940648                                                                        | 1.666943438 | 1.338733493 | 1           | 1.020703873 |             |             |
| 1.056857859 | 1.039552004                                                                        | 0.964163602 | 0.910651195 | 1.23375425  |             |             |             |
| YFL008W     | YFL008W::SMC1::coiled-coil protein involved in chromosome structure or segregation |             |             |             |             |             |             |
|             | 1                                                                                  | 0.677316643 | 0.638097676 | 0.71588045  | 1           |             |             |
| 0.810176289 | 0.877023147                                                                        | 0.724016395 | 0.73226186  | 1           | 0.717810553 |             |             |
| 0.717059036 | 0.697449476                                                                        | 0.905417728 | 1           | 0.938090649 | 0.984637558 |             |             |
| 1.051098124 | 1.237066603                                                                        | 1           | 0.969711221 | 0.975411574 | 0.932654889 |             |             |
| 1.259213308 | 1                                                                                  | 1.013955643 | 0.901105466 | 0.880986345 | 0.863177337 |             |             |
| 1.104912616 | 1                                                                                  | 1.144439439 | 0.989410236 | 1.167832056 | 1.175169047 |             |             |
| 0.95892708  | 1                                                                                  | 1.005199895 | 1.16978865  | 1.184924234 | 0.688956048 |             |             |
| 1.07876311  | 0.978071994                                                                        |             |             |             |             |             |             |
| YOR116C     | YOR116C::RPO31::RNA polymerase III large subunit                                   |             |             |             |             | 1           |             |
| 1.579293444 | 1.059231392                                                                        | 1.497848399 | 1.172038998 | 1           | 1.764686165 |             |             |
| 1.471372898 | 1.15693137                                                                         | 1.204514386 | 1           | 1.172050536 | 1.12147256  |             |             |
| 0.979161011 | 1.176044985                                                                        | 1           | 0.984350565 | 0.846494184 | 0.795236432 |             |             |
| 0.664063062 | 1                                                                                  | 0.909592163 | 0.775755933 | 0.801797673 | 1           |             |             |
| 1.040136623 | 0.917006707                                                                        | 1.118981592 | 1.283720555 | 1.064356765 | 1           |             |             |
| 0.790256571 | 0.636027237                                                                        | 0.597339233 | 0.792738266 | 0.480429997 | 1           |             |             |
| 0.632666874 | 0.68119735                                                                         | 0.818061371 | 0.698332584 | 0.659985949 | 0.87299711  |             |             |
| YOR130C     | "YOR130C::ORT1::Mitochondrial integral membrane protein, ornithine transporter"    |             |             |             |             |             |             |
|             | 1                                                                                  | 1.037255412 | 1.187349684 | 0.872775565 | 1.570120758 | 1           |             |
| 0.904189042 | 0.890703731                                                                        | 1.85086824  | 1.417248304 | 1           | 0.72545948  |             |             |
| 0.926726376 | 1.383968472                                                                        | 1.434718866 | 1           | 0.84116199  | 0.545146894 |             |             |
| 0.920458441 | 1.448116981                                                                        | 1           | 1.401092981 | 2.100548363 | 2.3179432   |             |             |
| 1.168102343 | 1                                                                                  | 1.086480497 | 1.098038355 | 0.847663501 | 0.913320783 |             |             |
| 1.232451124 | 1                                                                                  | 1.101254775 | 1.116673206 | 1.041789089 | 1.084926439 |             |             |
| 1.50369576  | 1                                                                                  | 0.997253546 | 0.931778116 | 0.878359086 | 1.171265213 |             |             |
| 0.961550835 | 1.299425988                                                                        |             |             |             |             |             |             |
| YFL011W     | YFL011W::HXT10::high-affinity hexose transporter                                   |             |             |             |             | 1           |             |
| 1.451543162 | 1.01116992                                                                         | 1.372946912 | 0.854555047 | 1           | 1.364354852 |             |             |
| 1.303649933 | 0.922094427                                                                        | 0.905638023 | 1           | 1.656373722 | 0.647258475 |             |             |
| 0.876337421 | 0.635300722                                                                        | 1           | 7.712418396 | 5.540935831 | 2.469476332 | 1           |             |
| 1.431363061 |                                                                                    | 1           | 1.019426733 | 0.844918502 |             |             |             |
| 0.796479048 | 0.75646449                                                                         | 1           | 0.685541425 |             |             | 1           |             |
| 1.730562399 | 0.973729947                                                                        | 0.69116085  | 2.18679048  | 0.75216104  |             |             |             |
| YOR132W     | YOR132W::VPS17::Peripheral membrane protein required for vacuolar protein sorting  |             |             |             |             |             |             |
|             | 1                                                                                  | 0.898151635 | 1.037430794 | 1.089146133 | 1.066274492 | 1           |             |
| 1.176646703 | 1.237673686                                                                        | 1.149821285 | 0.92025442  | 1           | 1.29446849  |             |             |
| 1.291367892 | 1.329692837                                                                        | 1.122645249 | 1           | 2.069942332 | 1.960191734 |             |             |
| 1.844101727 | 0.97412382                                                                         | 1           | 1.311860561 | 1.767769043 | 0.859313708 | 1           |             |
| 1.162085684 | 1.354942082                                                                        | 1.324065335 | 0.999918301 | 1.084612425 | 1           |             |             |
| 1.27356839  | 1.214892301                                                                        | 1.310620855 | 1.075378083 | 0.757418938 | 1           |             |             |
| 1.120689372 | 1.187475945                                                                        | 1.17603435  | 0.943335139 | 0.986465121 | 0.910648927 |             |             |
| YFL013C     | YFL013C::IES1::Hypothetical ORF                                                    |             |             |             |             | 1           |             |
|             | 0.798991994                                                                        | 0.805720732 | 1           | 0.710657432 | 0.798884788 | 0.841451919 | 1           |
| 0.74185299  | 0.891527445                                                                        | 0.614667876 | 0.972297857 | 1           | 0.997302753 |             |             |
| 0.316007672 | 0.746247045                                                                        | 0.813370642 | 1           | 1.125665081 | 2.129632062 |             |             |
| 2.039129874 | 1.670098681                                                                        | 1           | 0.935158649 | 1.117082523 | 0.798392929 |             |             |
| 0.736270912 | 0.965130498                                                                        | 1           | 1.145258183 | 1.150097566 | 1.24257431  |             |             |
| 1.20989536  | 0.994110441                                                                        | 1           | 1.186752008 | 1.337842863 | 1.282943003 |             |             |
| 1.002469866 | 1.65559307                                                                         | 0.872121497 |             |             |             |             |             |
| YOR134W     | YOR134W::BAG7::Structural homolog of SAC7                                          |             |             |             |             | 1           | 1.803472005 |
| 1.335552851 | 1.5215618                                                                          | 1.372540023 | 1           | 1.259143845 | 1.309101343 |             |             |
| 1.514383139 | 1                                                                                  | 1.592884997 | 1.655666407 | 1.736661545 | 1.385486281 | 1           |             |

|         |                                                                                                                                            |             |             |             |             |                         |
|---------|--------------------------------------------------------------------------------------------------------------------------------------------|-------------|-------------|-------------|-------------|-------------------------|
|         | 0.721758606                                                                                                                                | 0.828348655 |             | 0.547158489 |             |                         |
|         | 0.910726253                                                                                                                                |             | 0.785339552 | 0.899459678 | 1           |                         |
|         |                                                                                                                                            | 0.882886463 | 1.005769191 |             | 1.108331282 | 0.904673894             |
|         | 1.324819122                                                                                                                                |             |             |             |             |                         |
| YFL027C | YFL027C::GYP8::GAP for Ypt protein                                                                                                         | 1           |             | 0.768544489 | 0.776770268 |                         |
|         | 0.944530388                                                                                                                                | 0.932001284 | 1           | 0.791796478 | 0.858621651 | 0.96117963 1            |
|         | 0.875728625                                                                                                                                | 0.865562911 | 0.839849444 | 1           | 0.747770576 | 3.183958427             |
|         | 0.995394314                                                                                                                                | 1.336002424 | 1           | 1.612697228 | 3.679861137 | 2.976938135             |
|         | 2.943825861                                                                                                                                | 1           | 1.017776924 | 1.175028197 | 0.847736966 | 1.043201388 1           |
|         | 1.20368124                                                                                                                                 | 1.062491257 | 1.213582731 | 1.110121595 | 1.135458137 | 1                       |
|         | 1.559244779                                                                                                                                | 1.337438766 | 1.184231698 | 1.07838626  | 1.197846855 | 1.143564939             |
| YOR136W | YOR136W::IDH2::NAD+-dependent isocitrate dehydrogenase                                                                                     |             |             |             |             | 1                       |
|         | 1.022916685                                                                                                                                | 1.088519312 | 0.968876179 | 0.836035724 | 1           | 1.015570787             |
|         | 1.08028594                                                                                                                                 | 0.859298328 | 0.72386266  | 1           | 0.936983705 | 1.043125504             |
|         | 1.124260558                                                                                                                                | 0.779208209 | 1           | 2.69798275  | 2.021108866 | 3.203156597             |
|         | 2.091023927                                                                                                                                | 1           | 1.401076331 | 1.140757044 | 2.052340638 | 1.773450617 1           |
|         | 1.034529474                                                                                                                                | 0.962432572 | 1.711525236 | 1.00956071  | 0.760331332 | 1                       |
|         | 1.022890486                                                                                                                                | 1.238128277 | 1.420651284 | 2.230138286 | 0.964825493 | 1                       |
|         | 1.214836785                                                                                                                                | 1.214957595 | 1.238896856 | 1.014194948 | 1.758071686 | 0.755663491             |
| YFL029C | YFL029C::CAK1::binds and phosphorylates Cdc28p                                                                                             |             |             |             |             | 0.965328983             |
|         | 0.933830752                                                                                                                                |             | 0.876177236 |             | 0.672209771 | 0.847493803             |
|         | 0.989823848                                                                                                                                | 1.201566551 | 1.346187974 | 1.064161055 |             | 0.533300281             |
|         |                                                                                                                                            |             |             | 1           | 0.853533619 | 1.119483252             |
|         | 1.199032335                                                                                                                                | 0.661192266 | 0.824859565 | 1           | 1.607586791 | 1.871911378             |
|         | 1.708664541                                                                                                                                | 2.193108688 | 1.860318487 | 1           | 0.808349837 | 1.130117937             |
|         | 0.843318152                                                                                                                                | 1.087466429 | 2.382203352 | 1.195226768 |             |                         |
| YOR138C | YOR138C::YOR138C::molecular_function unknown                                                                                               |             |             |             |             | 1 0.943963726           |
|         | 1.084094043                                                                                                                                | 1.114505503 | 0.7315871   | 1           | 1.106939658 | 1.14065575              |
|         | 1.110222919                                                                                                                                | 0.966296035 | 1           | 1.174702074 | 1.32564898  | 1.149294703             |
|         | 1.317681047                                                                                                                                | 1           | 1.340049505 | 1.039499628 | 1.059438379 | 0.781443335 1           |
|         | 1.158199852                                                                                                                                |             | 0.891073884 | 0.782290217 | 1           | 0.868655351 0.9551251   |
|         | 1.184026166                                                                                                                                | 1.023018268 | 0.997873187 | 1           | 0.944700319 | 0.942303504             |
|         | 0.929342971                                                                                                                                | 0.952710789 | 0.727203386 | 1           | 1.201405014 | 0.954173527             |
|         | 1.109763828                                                                                                                                | 0.788684459 | 1.002390583 | 0.762668497 |             |                         |
| YFL031W | YFL031W::HAC1::Transcription factor that is required for the unfolded protein-response pathway; binds to CRE motif; homologous to ATF/CREB |             |             |             |             | 1                       |
|         | 1                                                                                                                                          | 0.89661035  | 0.6891695   | 1.530539554 | 0.542522837 | 1 1.116474998           |
|         | 1.358615935                                                                                                                                | 1.070572085 | 1.583393313 | 1           | 1.078368943 | 1.13363969              |
|         | 1.476512651                                                                                                                                | 1.499563724 | 1           | 0.577590605 | 0.80316373  | 0.697127989             |
|         | 0.295059142                                                                                                                                | 1           | 0.630300589 | 0.473809721 | 0.28937862  | 0.319375976 1           |
|         | 0.873545624                                                                                                                                | 0.825567816 | 0.762526849 | 1.67474795  | 0.86457459  | 1                       |
|         | 0.819441972                                                                                                                                | 0.329889916 | 0.815864594 | 1.081056935 | 0.187099514 | 1                       |
|         | 0.62255829                                                                                                                                 | 0.264554248 | 0.75819597  | 0.48248904  | 0.751653586 | 0.381772055             |
| YFL033C | YFL033C::RIM15::RIM15 is glucose-repressed; RIM15 is required for                                                                          |             |             |             |             | IME2 expression         |
|         |                                                                                                                                            |             |             | 0.96902287  | 0.694678996 | 1.447999022 0.605981828 |
|         | 1.134452108                                                                                                                                | 1.267532876 | 0.826787537 | 0.749610754 |             | 1.100742001             |
|         | 1.180412232                                                                                                                                | 0.671925436 | 0.911438753 |             | 2.059674563 | 2.010244771             |
|         | 2.436927203                                                                                                                                |             | 1           | 0.481330699 | 0.862116301 | 0.882746095 1           |
|         | 1.083373057                                                                                                                                | 0.992997749 |             | 1.108317933 | 1.030225625 | 1                       |
|         | 0.635850827                                                                                                                                | 0.861301466 | 0.699992609 | 0.457656274 | 1           | 0.73187881              |
|         | 0.574737798                                                                                                                                | 0.859413762 | 0.359469064 | 0.859908851 | 0.704001714 |                         |
| YFL035C | YFL035C                                                                                                                                    |             |             |             |             | 1 0.877442571 1         |
|         | 0.831815909                                                                                                                                | 0.885827082 | 1.045965622 | 0.895767936 | 1           | 0.78825248              |
|         | 0.874879672                                                                                                                                | 1.148126576 | 0.974174589 | 1           | 0.438222006 | 0.529268022             |
|         | 0.456210585                                                                                                                                | 0.735025347 | 1           | 0.750071519 | 1.600545823 | 1.664469212             |
|         | 1.209065914                                                                                                                                | 1           | 1.007823096 | 0.84589982  | 0.594798139 | 0.753925641             |
|         | 1.03668138                                                                                                                                 | 1           | 0.942971338 | 0.979431698 | 0.723521863 | 0.989076822             |

1.456305111 1 0.909535289 0.844115019 1.117489389 0.715897113  
 1.411857174 1.107664347  
 YDR387C YDR387C::YDR387C::molecular\_function unknown 1 1.069775238  
 0.721146436 0.892075891 0.619105639 1 0.955824845 0.952468626  
 0.772181098 1 1.181442784 0.99496503 1.01235283 0.825218352 1  
 1.33529752 1.116632803 1 1.701251579 1.517828741 1.280056883  
 0.896281802 1 1.201799288 1.300748945 1.472789067 1.303450864  
 1.109000482 1 0.830295797 0.844763833 0.958949442 0.652962536  
 0.48981986 1 1.128341236 0.919541548 0.912101827 0.336759617  
 0.884656468 0.881753341  
 YFL037W YFL037W::TUB2::beta subunit of tubulin monomer; involved in  
 chromosome segregation and nuclear migration 1 0.938699436 0.608531809  
 0.826870532 0.475621535 1 0.922186664 0.865542558 0.590465963  
 0.748809701 1 0.937523545 0.748462087 0.532909795 0.643221754 1  
 1.583030499 0.79103121 0.96631221 0.578397453 1 0.747357439  
 0.561569427 0.456035199 0.562724997 1 1.077643058 0.794021076  
 0.968112817 1.087210988 0.682044068 1 0.950939465 0.73893596  
 0.770262077 0.717257263 0.535435119 1 0.969167741 0.785813928  
 0.869459005 0.706786902 0.891226843 0.891385238  
 YDR389W YDR389W::SAC7::Suppressor of actin mutation 1 1.047114785  
 0.99696158 0.936048455 1 1.013112762 1.167611608 0.912883455  
 1.077643792 1 1.04140764 0.738688636 1.126397542  
 1 0.82013546 0.689038752  
 0.789785182 0.91456933 0.658180623 1 0.856499528 0.779681825  
 1.08973822 0.939317002 0.563143089 1 0.857218167 1.037648635  
 1.182864559 0.483244477 0.863630798 0.808200933  
 YDR403W "YDR403W::DIT1::Disp. for spores & spore viability - required for  
 dityrosine accumul. in the outer spore wall (s.w.), s.w. maturation & resist. to  
 ether & lytic enzymes. Spore-autonomous function in heterozygotes. mRNA is trans.  
 mid/late in s.w. formation" 0.920230858  
 0.966440245 1.230589143 1  
 1.457614859 1.528801019 1 1.623121794 2.073482992 1.170873451 1  
 1.040139827 0.857868323 1.184521645 1.178900079 1.116647971  
 0.877475765 1.224963813 1 0.828671902 1.39156055  
 0.966688872  
 YDR405W YDR405W::MRP20::Involved in mitochondrial translation 1  
 0.931917794 1.296147009 0.714125575 1 1.039367665 1.285233545  
 0.973136277 1 1.103808965 1.31975847 2.12107082 0.958892407 1  
 1.035105818 1.045702216 0.974700967 0.717126868 0.698886875  
 0.529434246 1 0.947892394 0.963249997 0.980404901 0.84271058  
 1.233053162 1 1.287512187 1.464997425 1.465241124 1.500558882  
 1.555455722 1 1.033047862 1.157922254 1.381018446 0.68901324  
 1.5089934 0.972818213  
 YDR407C YDR407C::TRS120::targeting complex (TRAPP) component involved in ER  
 to Golgi membrane traffic 1 0.997716273 0.774231296 0.939042633  
 0.645049752 1 0.976445918 1.15671591 0.589886721 1  
 1.09173431 0.946154467 1.448194091 1.17166162  
 0.596879746 1 1.403744642 1.330242339 1 1.053066301  
 1.06159242 1.160830189 0.967748155 1.087740015 1 1.038929464  
 0.786774981 0.891377084 0.675200752 0.591723522 1 1.051683079  
 1.011726979 1.041709113 0.488343787 0.699102977  
 YDR409W YDR409W::SIZ1::Sap and mIZ. Contains two known protein motifs: SAP  
 (DNA binding) and MIZ-finger; ubiquitin-like protein ligase 1  
 1.078607396 0.851835893 1.02981247 0.758700952 1.061808425  
 0.942411735 0.848732813 1.051311079 1.093679419 0.974584034  
 0.911438753 1 1  
 0.930529513 0.973447771 1.058495984 1.193041214 1 0.701327318

0.730029289 0.694357347 0.897978958 1 1.024233646 0.959855364  
 0.868375493 0.672532316 1.113039546 1.034987604  
 YDR411C YDR411C::YDR411C::molecular\_function unknown 1 1.047501803  
 0.989692541 0.784344816 0.66878654 1 1.006728104 1.166785828  
 0.811736774 0.796521141 1 1.118417563 1.168144432 0.641002633  
 0.781761085 1 1.130800959 1.222819901 1.206317123 1.103533779 1  
 1.184339765 1.22331702 1.191046632 1 1.148189703 1.077676515  
 0.947897697 1.208335617 1.151300786 1 0.78628936 0.790701025  
 1.126734932 0.835741 0.874052094 1 0.938602583 0.825727581  
 0.98819483 0.895166851 1.367468071 1.081395653  
 YDR413C YDR413C::YDR413C::molecular\_function unknown 1 1.089569212  
 1.168268581 1.029478776 1.374458731 1 0.805902705 0.908064922  
 1.22880478 1.143545378 1 0.738368437 1.474624328 1.212395933  
 1.219187656 1 1  
 0.711309517 0.758111931 0.542726707 0.649028539 0.858664149 1  
 1.003204481 1.191231149 0.783360647 1.207126602 2.362424333 1  
 0.791914141 0.787128835 0.869001503 0.989272605 0.933773019 1.083146878  
 YDR427W YDR427W::RPN9::Regulatory Particle Non-ATPase 1 1.652692257  
 1.487165757 1.288697678 1.611182338 1 1.458567697 1.161728286  
 1.457953154 1.392756056 1 1.141738358 1.364534922 1.937999962  
 2.99336244 0.779984844 0.560547056  
 1 1.096905045 1.004763741 0.869157711 0.957182661 1.290961632 1  
 0.992160397 1.363560495 1.270295158 0.888791456 1.083812404 1  
 1.032452331 1.189450221 1.051866471 0.906205429 1.003467084 1.183843646  
 YDR429C YDR429C::TIF35::Translation initiation factor 3 p33 subunit 1  
 0.998587494 1.011138617 0.911126657 1.25960363 1 0.896985394  
 0.915075416 1.269371851 1.110827104 1 0.977781003 0.706380458  
 0.671488863 1 0.752525469 0.80064589 0.425251521 0.863013575 1  
 1.188375056 0.591905504 0.770665791 1.093275137 1 0.852925996  
 1.099784758 0.813896486 0.777682019 1.049400111 1 1.190892817  
 1.591458547 1.199516508 1.012183889 1.56344203 1 1.009370648  
 0.825127919 0.756707054 1.001215181 0.771077473 1.119923134  
 YOR140W YOR140W::SFL1::Transcription factor with domains homologous to myc  
 oncoprotein and yeast Hsflp required for normal cell surface assembly and  
 flocculence 1 0.809310121 0.777101281 0.843141793 0.595046809 1  
 0.900803942 0.965228649 0.808211884 0.718481009 1 0.922937615  
 0.779379434 0.65333237 0.885571229 1 0.556382531 0.484186603  
 0.752244677 0.763722082 1 0.969429026 0.945065097 0.818773291  
 1.01844203 1 0.876621291 0.78051217 0.92710155 1.161197637  
 0.806141499 1 0.628155256 0.49963704 0.544770666 0.862946933  
 0.508175586 1 0.712644034 0.634220761 1.027746986 0.512234103  
 0.905114738 0.676857354  
 YOR154W YOR154W::YOR154W::molecular\_function unknown 1 0.830326775  
 0.717170127 1.020042274 0.976133326 1 0.774104018 0.796422077  
 1.085886059 0.855052466 1 0.641141201 0.686449725 0.633695019  
 0.939333466 1 0.686558129 0.468166166 0.504964957 1  
 0.818207918 1.452711167 1 0.699585749 0.576754173  
 0.807390219 0.823039587 0.891350866 1 0.525962915 0.639114792  
 0.36330473 1.155950983 1.28761778 1 0.514750961 1.225513425  
 0.870090394 0.685046242 0.718887286  
 YOR156C YOR156C::NFI1::Interacts with C-terminus of CDC12. Contains two  
 known protein motifs: SAP (DNA binding) and MIZ-finger 1 1.787041834  
 1.67625279 1.578765909 1.513099526 1 1.74475562 1.695782786  
 1.923024192 1.562608737 1 1.917144039 1.730871639 1.744067986  
 1.519840565 0.846951584 0.288342815 1  
 1 1.100980706 1.224528778 1.045463661 0.993037284 0.975454575 1

1.098139823 1.052187687 1.238811608 1.081972286 0.819855212 1  
1.239948604 1.182495299 1.24676567 0.629905457 1.179971379 0.915902707  
YMR104C YMR104C::YPK2::protein kinase 1 0.97102678 1.030985798  
1.349695003 0.620390799 1 1.206913379 1.640724742 0.766498668 1  
1.243066847 1.479968551 1.022653157 1.165964646 1 2.178054134  
2.365039821 1.099184461 1.335299497 0.984032715 0.627276342 1  
0.956541715 0.956663593 0.974823256 0.951544757 0.954947178 1  
1.087255341 0.501522574 0.891886265 0.957916718 0.480197148 1  
0.973201959 0.610939727 0.808798146 0.637711123 0.95816336 0.851982143  
YOR158W YOR158W::PET123::May be component of mitochondrial translation  
appartus and may interact with small subunit of mitochondrial ribosomes or with  
Pet122p to promote translational initiation of cytochrome c oxidase subunit III  
mRNA 1 1.53974563 1.408098766 1.85721055 1 1.396646396  
1.359977427 1.640542991 1.661121047 1 1.165184898 1.292418193  
1.530533286 1.242413174 1.077769121 1.027267074 0.675668991  
1.030997908 1 0.977439339 1.081180847 0.88494172  
0.72621113 1.069192395 1 1.379470606 1.50203574 1.208415734  
1.072755709 1.579803936 1 1.401214249 1.365668701 1.054336272  
1.668112433 1.682073707  
YMR121C YMR121C::RPL15B::Homology to rat L15 1 1.203902004  
1.241670351 1.153026234 1.856514588 1 1.175541126 1.052723611  
1.36631236 1.470666892 1 1.001994948 1.071471343 0.822388999  
1.129736689 1 0.86081186 0.505012153 0.248774235 0.637571932 1  
1.200076964 0.510124199 0.415286586 0.650754506 1 1.13396382  
1.11676474 1.384452536 1.875103173 1.669043095 1 1.174899939  
1.131353542 0.700728391 0.658818343 0.642173237 1 1.273518619  
0.958493343 0.909756435 1.3980738 1.064592845 0.78018096  
YOR160W YOR160W::MTR10::Protein involved in mRNA transport from nucleus to  
cytoplasm 1 1.123833547 0.771339733 1.101988448 0.790021777 1  
1.045890143 1.216180358 0.911968852 0.807077412 1 0.924831676  
0.829303754 0.785660198 0.937498602  
1 0.91894983 0.939004796 0.906123106 1.053102586  
0.870477101 1 1.010567904 0.730178237 0.690176593 1.004805851  
0.579538502 1 0.911438099 0.647420338 0.866054303 0.696967172  
0.77619308 0.746031646  
YMR123W YMR123W::PKR1::Pichia farinosa Killer toxin Resistance 1  
1.063439875 1.279541918 0.781596068 1.537503776 1 0.882931158  
0.935117634 1.295754818 1.20198089 1 1.056138259 0.93130362  
1.151954084 1.015518995 1 0.649642782 0.299007312 0.446984731  
1.006067728 1 0.97229417 1.167813546 0.783608138 0.759587759 1  
1.239647946 1.285151653 0.923376156 0.986329191 0.992513627 1  
0.949163409 1.271721284 0.729479071 0.967599419 1.407789704 1  
0.931311675 1.020635973 0.936091367 1.689356496 0.66324451 1.057753744  
YOR162C YOR162C::YRR1::Yeast Reveromycin-A Resistant 1 1.119945455  
0.997668782 1.240602302 0.948147279 1 1.146023006 1.279607542  
1.059688557 0.935096527 1 1.740363769 1.567185253 0.944046241  
1.260450612 1 2.127449725 1.415883439 0.856826914  
0.501578393 1 1.316580501 1.548696858 1.547456831 1.050039195  
1.009278435 1 1.352474647 1.052695103 1.226543169 1.062374222  
0.712812415 1 1.411749934 1.537868373 1.349298296 0.965928174  
0.950417399 1.047246286  
YMR125W YMR125W::STO1::Large subunit of the nuclear cap-binding protein  
complex 1 1.179866667 0.939421159 1.555057811 1 1.45152013  
1.416843102 0.998195238 0.902549558 1 1.05203944 1.055967343  
0.580149736 1.149284679 1 0.531333648 0.872836369 0.592073455 1  
0.900846817 0.859324164 0.642676639 1 0.935481127 1.012401566  
1.163445091 1.18471277 1.135552509 1 1.032064719 0.860241238



0.765264651 0.91182729 0.641159213 1 0.933730031 0.804334665  
 0.942934902 0.997968618 0.821596819 0.857235872  
 YOR164C YOR164C::YOR164C::molecular\_function unknown 1 1.335748284  
 1.132481393 1.285426887 1.369799308 1 1.172952158 1.444998196  
 1.376604892 1.304020077 1 1.337267641 1.125798644 1.303779749  
 0.452860961 1  
 1.195671936 1.505472577 1.524181595 0.875672123 0.822496368 1  
 1.866246437 3.511086889 2.792188275 2.532086186 2.025308384 1  
 3.730087241 0.931635851 1.317806165 0.662465439 1.902731037  
 YMR127C "YMR127C::SAS2::Protein involved in silencing HMR, homologous to  
 acetyltransferases" 1 1.083936905 1.028641446 1.120194507 1.361172752 1  
 0.979793952 1.45954069 1.433029224 1 0.85820264 0.84141925  
 1.004611152 1.459952054 1 0.661666145 0.524419119 0.747955805  
 1.121340001 1 1.059155732 1.777797619 1.521634784 1.318761812 1  
 0.858224583 0.787630738 0.70695688 0.798684603 0.916623896 1  
 0.799574527 1.034079262 0.570182539 0.952042389 1.126960378 1  
 0.908849838 1.114374371 0.928349178 1.29067994 0.912822862 1.427267116  
 YOR178C "YOR178C::GAC1::Regulatory subunit for phosphoprotein phosphatase  
 type 1 (PP-1), also known as Glc7p, which regulates glycogen synthase-2" 1  
 1.233106912 1.27027721 1.401622224 1.280971923 1 1.231995758  
 1.316472439 1.206146215 1.194345968 1 1.398143433 1.332963279  
 1.273123128 1 2.252577877 1.738774938 0.556471809  
 0.506553217 1 0.923091671 1.031573817 0.955901064  
 0.90555413 1.100154921 0.979204122 0.881126796 1.118747507  
 1.055799393 1.527376822 1 0.866641123 0.84002777 0.918879663  
 1.197020025 1.088400659  
 YMR129W YMR129W::POM152::May be involved in duplication of nuclear pores and  
 nuclear pore complexes during S-phase 1 1.35502535 0.991447154  
 1.67939736 0.979098044 1 1.606510107 1.395910925 0.890652338  
 0.696953618 1 1.217046869 1.202277877 0.448668483 1.195049578  
 1.603623714 1  
 1.139998043 0.934147682 1.030818367 1.383249503 0.972186737 1  
 1.270377344 0.958531582 0.61181277 1.055630012 0.593721786 1  
 0.858021104 0.68982886 0.817569937 0.843648381 0.609760579 0.827464674  
 YOR180C "YOR180C::DCI1::Delta(3,5)-delta(2,4)-dienoyl-CoA isomerase" 1  
 0.895196012 0.869413806 0.900004513 0.765608223 1 1.018588211  
 0.919423025 0.823134995 0.981571479 1 0.792869037 0.898811959  
 0.857507649 0.797939136 1 0.718284807 0.68804039 1.027203357  
 1.175042293 1 0.891997312 1.448859989 1.141095443 0.902157683 1  
 1.013460003 1.16296526 1.210856982 1.293686404 1.153346505 1  
 1.026022677 1.208915386 0.988361681 1.00475855 0.831469739 1  
 0.85921175 0.991214478 1.053068995 0.90588094 0.944637092 0.944798293  
 YOR180C "YOR180C::DCI1::Delta(3,5)-delta(2,4)-dienoyl-CoA isomerase" 1  
 1.234131621 1.112109465 1.237329026 1.12655379 1 1.076873653  
 1.083401945 1.132980048 1.228208051 1 1.057550066 1.054970187  
 1.065177998 1.226263242 0.757602834  
 0.773006859 1 0.992973598 0.951963547 1.176829979  
 1.186281353 1.068776756 1 0.903034959 0.711994794 0.762270995  
 0.808401518 1 0.878573838 0.777163983 0.960342471 1.045291415  
 1.073789749 1.029733823  
 YMR131C YMR131C::RRB1::RiboSome Assembly 2 1 0.994632488 0.75211825  
 1.163023282 1.088812033 1 1.039232889 0.904993747 0.933499352  
 1.039533342 1 0.721029395 0.473288815 0.403479718 1.137273715 1  
 0.481430879 0.131842746 0.335181911 1 0.349212505 0.088810275  
 0.058473434 0.37060418 1 0.858639454 0.647090763 0.749822354  
 1.012994112 0.916769909 1 0.913311248 0.664882808 0.403602505

|          |                                                                                 |             |             |             |             |             |             |
|----------|---------------------------------------------------------------------------------|-------------|-------------|-------------|-------------|-------------|-------------|
|          | 0.804133697                                                                     | 0.892608509 | 1           | 0.674761494 | 0.571873047 | 0.686777459 |             |
|          | 1.026801202                                                                     | 0.398827661 | 0.774927232 |             |             |             |             |
| YOR182C  | YOR182C::RPS30B::Homology to mammalian S30                                      |             |             |             |             | 1           | 0.805040752 |
|          | 1.307466748                                                                     | 0.783464115 | 1.67226489  | 1           | 0.788897107 | 0.817410429 |             |
|          | 1.385191568                                                                     | 1.158471554 | 1           | 0.707557055 | 0.865036402 | 0.968730513 |             |
|          | 0.850895442                                                                     | 1           | 0.845457458 | 0.346409282 | 0.418645638 | 0.599359481 |             |
|          | 1.670921078                                                                     | 1.758765645 | 1.031815047 | 0.818516017 | 1           | 0.709367679 |             |
|          | 0.889133202                                                                     | 0.602461615 | 0.611547318 | 1.025444778 | 1           | 1.489115301 |             |
|          | 2.23279585                                                                      | 1.311117916 | 1.536961223 | 2.833937776 | 1           | 0.771615612 |             |
|          | 1.352671109                                                                     | 1.152411058 | 1.855018735 | 1.403478895 | 1.357217158 |             |             |
| YMR147W  | YMR147W::YMR147W::molecular_function unknown                                    |             |             |             |             | 1           | 1.175424139 |
|          | 0.817557199                                                                     | 1.100657639 | 0.765320765 | 1           | 0.98916036  | 1.019523407 |             |
|          | 0.676929612                                                                     | 0.982266099 | 1           | 1.28235457  | 0.911900522 | 0.84406     |             |
|          | 1.034821057                                                                     | 1           |             | 0.698502687 | 0.598772459 | 1           |             |
|          | 0.709725572                                                                     | 0.441129279 | 1           | 1.005333283 | 0.900565612 | 0.912661753 |             |
|          | 1.205924067                                                                     | 1.051998421 | 1           | 1.14914827  | 0.72656347  | 0.840745239 |             |
|          | 1.13034242                                                                      | 1           | 0.875766708 | 0.702790781 | 0.91591698  | 0.831263165 |             |
|          | 0.709211979                                                                     |             |             |             |             |             |             |
| YMR149W  | "YMR149W::SWP1::oligosaccharyl transferase glycoprotein complex, delta subunit" |             |             |             |             | 1           | 1.366803198 |
|          | 0.968244726                                                                     | 0.862666704 | 0.860343707 | 1.004185502 | 1           | 1.190101569 |             |
|          | 0.977179121                                                                     | 0.976371331 | 0.924310827 | 1           | 1.412609303 | 0.909054516 |             |
|          | 0.797865243                                                                     | 0.85875646  | 1           | 0.877466959 | 0.59514926  | 0.582498757 |             |
|          | 0.886737652                                                                     | 1           | 1.327288374 | 1.329190415 | 1.476807614 | 0.961489502 |             |
|          | 1.053996421                                                                     | 1           | 1.077813491 | 1.120089171 | 1.011254451 | 0.716688201 |             |
|          | 0.947736884                                                                     | 1           | 0.953051405 | 1.303219519 | 0.987650761 | 0.756035955 |             |
|          | 1.059505073                                                                     |             |             |             |             |             |             |
| YMR151W  | YMR151W::YIM2::Product of gene unknown                                          |             |             |             |             | 1           | 1.131552789 |
|          | 0.883722794                                                                     | 1.005213242 | 0.803733529 |             | 0.857195429 | 0.929231189 |             |
|          | 0.902311372                                                                     | 0.820235213 |             | 1.083102259 | 1.082092115 | 1.101362625 |             |
|          | 0.866001268                                                                     | 1.282584826 |             |             |             |             |             |
|          | 0.734972077                                                                     | 0.801669264 | 0.881004251 |             | 0.932950223 | 0.805316573 |             |
|          | 0.971186721                                                                     | 0.837143066 | 0.78422892  | 0.807710553 | 1           | 1.053221937 |             |
|          | 1.108842653                                                                     | 1.189220176 | 0.835337335 | 1.14013451  | 0.951803299 |             |             |
| YOR184W  | YOR184W::SER1::phosphoserine transaminase                                       |             |             |             |             | 1           | 1.156233455 |
|          | 0.982752046                                                                     | 0.978912781 | 0.86649503  | 1           | 0.983005095 | 1.016619456 |             |
|          | 0.950708133                                                                     | 1.026267295 | 1           | 1.215746646 | 1.359979536 | 0.772074068 |             |
|          | 0.759023648                                                                     | 1           | 1.778136982 | 1.330865316 | 0.867811876 | 0.680079703 |             |
|          | 1.534814034                                                                     | 1.045346451 | 0.684730168 | 0.912916299 | 1           | 1.107650465 |             |
|          | 1.201327641                                                                     | 1.422251397 | 1.392235776 | 1.177877484 | 1           | 1.162277105 |             |
|          | 1.094039387                                                                     | 1.182893202 | 1.151884769 | 2.821941318 | 1           | 1.042097903 |             |
|          | 1.201771282                                                                     | 1.194274349 | 1.736265548 | 3.188816513 | 0.886131457 |             |             |
| YOR186W  | YOR186W::YOR186W::molecular_function unknown                                    |             |             |             |             | 1           |             |
|          | 1.779558084                                                                     | 1           | 1.406119664 | 1.475966043 | 2.010711848 | 1           |             |
|          | 1.768917855                                                                     | 3.337591958 | 1           | 1.444981543 | 1.819176246 |             |             |
|          | 0.907683811                                                                     | 1           | 1.103862196 | 1.98585513  | 1.840591765 | 1           |             |
|          | 1.164522486                                                                     |             | 1.244212306 |             | 0.651108942 |             |             |
|          | 1                                                                               |             | 1.114164316 |             | 1.116420579 |             |             |
| YMR052CA | YMR052CA::YMR052C-A::molecular_function unknown                                 |             |             |             |             | 1           | 0.979225201 |
|          | 1.550212822                                                                     | 1.129226997 | 1.762913698 | 1           | 1.018048928 | 1.010773267 |             |
|          | 1.641961275                                                                     | 1.417052794 | 1           | 1.150232069 | 1.502009349 | 1.20591414  |             |
|          | 1.794610787                                                                     | 1           | 1.39313638  | 4.634332044 | 0.93720934  | 1.018626406 |             |
|          | 0.72411185                                                                      | 1.218858747 | 0.713598222 | 0.546828425 | 1           | 0.768480718 |             |
|          | 1.12253754                                                                      | 0.732268991 | 0.596417304 | 0.907061918 | 1           | 1.548284332 |             |
|          | 1.692685932                                                                     | 1.948839615 | 2.032238353 | 2.210450301 | 1           | 1.221919181 |             |
|          | 1.274800986                                                                     | 1.334163458 | 0.967875208 | 1.933017932 | 1.065634415 |             |             |

YOR188W     YOR188W::MSB1::Protein that may play a role in polarity establishment and bud formation     1     0.993504278 0.953130174 1.315365505  
                                           0.862068739 1     1.135429506 1.09717962 0.975299974 0.908425501 1  
                                           0.993849942 0.733436675 0.657307124 1.07665846     0.969806123  
                                                                                           1     0.783371298 0.685243877  
                                           0.737700442 0.818501847 0.873681187 1     0.766338358 0.62682694  
                                           0.623126496 1.1198082 0.505231416 1     0.66888689 0.694786512  
                                           0.977645017 0.599881132 0.719296383 0.648837381  
 YMR153W     YMR153W::NUP53::Component of karyopherin docking complex of the nuclear pore complex     1     1.153561789 1.146551545 1.138969049 1.097236127 1  
                                           1.169462609 1.094026421 1.084569491 1.122162967 1     0.91814536  
                                           1.022804401 0.849695579 1.158334318 1     0.95992033     0.814827336  
                                           0.77295447 1     1.031198355 1.21122236 0.78170457     1  
                                           1.052460354 1.059096406 1.008053042 0.981496039 1.021793578 1  
                                           0.983506004 0.848603811 0.738442245 0.855949302 0.945069697 1  
                                           0.935767564 0.875864662 0.843216437 1.136202136 0.894862533 1.224998019  
 YMR084W     YMR084W::YMR084W::molecular\_function unknown     2.352188002     0.905638622  
                                           0.91241773 1     0.989853754     1.185569769 1.104001613 1  
                                           3.397265745     3.881721246 1     0.87355344 1.324146078  
                                           1.040857382 1.010287582 1.163250312 1     0.740441778  
                                           1.223017139     1     0.898237805     0.887171402 0.071442336  
                                           1.108979544 0.688240476  
 YOR202W     YOR202W::HIS3::imidazoleglycerol-phosphate dehydratase     1  
                                           1.629788944 1.429861023 1.043779939 1.100989098 1     1.06204349  
                                           1.366148497 1.269817481 1.150131641 1     1.77261914 2.284937493  
                                           0.999050237 0.748534039     1.06753121     0.529490102  
                                           0.746970273 0.574270916     1     1.087642914 0.921927753 0.792943065  
                                           0.971163289 0.896928481 1     1.037817513 1.446288103 0.719195072  
                                           0.709413848 2.64961126 1     1.432361178 1.495111606 1.07341874  
                                           1.535480462 2.038366458 1.302928543  
 YMR155W     YMR155W::YMR155W::molecular\_function unknown     1     1.33368168  
                                           0.990438686 1.233983348 0.898100284 1     1.424134035 1.217160214  
                                           0.977838611 0.886268848 1     1.070449148 1.142074694 0.948645149  
                                           0.977037447 1     1.588227467     0.974486002  
                                           0.773807517     1     1.200296462 1.314383241 1.516390612  
                                           1.278648047 1.016929341 1     0.985239133 0.915567217 0.863187674  
                                           0.706334537 0.673639491 1     1.008454018 0.840983036 0.940008095  
                                           0.970620124 1.075962334  
 YMR086CA    YMR086CA::YMR086C-A::molecular\_function unknown 1     1.190327491  
                                           1.460143679 1.184602986 1.331800029 1     1.09757249 1.1028364  
                                           1.435633089 1.348467493 1     1.397760271 1.033991908 1.394179003  
                                           1.173893737 1     2.175470442     1.775181155 1.074866127 1  
                                           0.496887891 3.263291962 2.070907819 1.019043176 1     0.780969631  
                                           0.997834519 0.671351276 0.506350788 0.740787855 1     0.971312621  
                                           1.452288176 1.337517686 1.194126181 1.676520089 1     0.924663315  
                                           1.998076845 1.23957061 1.209612364 1.56788598 0.872121497  
 YOR204W     "YOR204W::DED1::ATP-dependent RNA helicase of DEAD box family; suppressor of a pre-mRNA splicing mutation, prp8-1" 1     1.47773647  
                                           0.775112094 1.875958241 0.606588632 1     1.469220493 1.393617014  
                                           0.885399581 0.989774874 1     1.135490976 0.846955795 0.582595228  
                                           0.866972899     1.861432     2.245415707     1  
                                                                                           1     0.549001984 0.381687592 0.708850741 1.072786606 0.470883574 1  
                                           0.605936502 0.383137942 0.492439285 0.568589512 0.16456255 1  
                                           0.785012177 0.382064344 0.670700054 0.423314437 0.489688793 0.438687613  
 YMR157C     YMR157C::YMR157C::molecular\_function unknown 1     1.280871922  
                                           1.361569508 1.335260719 1.722897506 1     1.154240379 1.200528079

|             |                                                                                             |             |             |             |             |             |   |
|-------------|---------------------------------------------------------------------------------------------|-------------|-------------|-------------|-------------|-------------|---|
| 1.629459784 | 1.673833685                                                                                 | 1           | 1.255901813 | 1.232952479 | 1.663574597 |             |   |
| 1.152341988 | 1                                                                                           | 1.403368429 | 1.092534204 | 1.078209972 | 1.214975257 | 1           |   |
| 1.39405563  | 1.086169362                                                                                 | 1.687394683 | 0.91257131  | 1           | 1.164849332 |             |   |
| 1.272276338 | 1.014457459                                                                                 | 0.995622368 | 1.065886279 | 1           | 1.186046969 |             |   |
| 1.486793901 | 0.859164969                                                                                 | 0.830340038 | 1.125905858 | 1           | 1.617004337 |             |   |
| 1.589571456 | 1.062593342                                                                                 | 1.488639945 | 1.207485451 |             |             |             |   |
| YOR206W     | YOR206W::NOC2::Nucleolar Complex 2; involved in nuclear export of pre-ribosomes             |             |             |             |             |             |   |
| 1           | 1.071770832                                                                                 | 0.789208186 | 1.060365331 | 1.243952498 | 1           |             |   |
| 0.957200408 | 0.838062271                                                                                 | 0.957403947 | 1.07606436  | 1           | 0.631089901 |             |   |
| 0.39726143  | 0.440046465                                                                                 | 1.002709898 |             |             | 1           |             |   |
|             | 1                                                                                           | 0.64190947  | 0.448889965 | 0.517290399 | 0.664302982 |             |   |
| 0.761107119 | 1                                                                                           | 0.761170239 | 0.642241445 | 0.40132499  | 0.976979367 |             |   |
| 0.874611449 | 1                                                                                           | 0.633694398 | 0.643152341 | 0.805157464 | 0.892164372 |             |   |
| 0.494057812 | 0.764419775                                                                                 |             |             |             |             |             |   |
| YMR173W     | YMR173W::DDR48::DNA damage inducible; implicated in the production or recovery of mutations |             |             |             |             |             |   |
| 1           | 1.418337989                                                                                 | 1.394187095 | 1.662774471 |             |             |             |   |
| 1.36255233  | 1                                                                                           | 1.475814883 | 1.548130125 | 1.453807666 | 1.438181076 | 1           |   |
| 2.256510755 | 3.14582322                                                                                  | 2.284022006 | 1.616444945 | 1           | 4.206402706 |             |   |
| 4.257670349 | 4.476454858                                                                                 | 3.589105804 | 1           | 1.840701557 | 1.603763732 |             |   |
| 2.176248923 | 2.346377573                                                                                 | 1           | 1.982930227 | 2.954894374 | 4.637675669 |             |   |
| 1.341928876 | 0.90924202                                                                                  | 1           | 3.42631097  | 8.796580915 | 6.592691316 |             |   |
| 5.86089543  | 2.195577495                                                                                 | 1           | 4.267388709 | 6.452997763 | 6.835205705 |             |   |
| 2.111494255 | 2.240082643                                                                                 | 2.339667268 |             |             |             |             |   |
| YOR208W     | YOR208W::PTP2::protein tyrosine phosphatase                                                 |             |             |             |             |             |   |
| 1           |                                                                                             |             | 1           | 0.747002104 |             |             |   |
| 0.800089074 | 0.868446531                                                                                 | 0.860520493 | 1           | 0.933525261 | 0.920352662 |             |   |
| 0.594968857 | 1                                                                                           | 0.922796437 | 0.91440108  | 0.78144582  | 0.878679574 | 1           |   |
| 1.124917398 | 1.406541026                                                                                 | 0.827528783 |             | 1           | 0.987613773 | 0.777055035 |   |
| 1.027804057 | 1.032934919                                                                                 | 1           | 0.974322199 | 0.940498066 | 0.868018718 |             |   |
| 0.816465855 | 0.707934762                                                                                 | 1           | 1.162037076 | 1.075708995 | 0.952068458 |             |   |
| 1.164803472 | 1.022573774                                                                                 | 1           | 1.338268076 | 1.126191254 | 1.004063399 |             |   |
| 0.911835797 | 1.26480493                                                                                  | 1.086649433 |             |             |             |             |   |
| YMR177W     | YMR177W::MMT1::Protein involved in mitochondrial iron accumulation                          |             |             |             |             |             |   |
| 1           | 0.848880198                                                                                 | 0.647228783 | 0.83116461  | 0.860963112 | 1           | 0.840057048 |   |
| 0.68346863  |                                                                                             | 0.845454521 | 1           | 0.888737151 | 0.584308258 | 0.419345309 |   |
| 1.037503374 | 1                                                                                           | 1.137907274 |             | 0.509194334 | 0.753945441 |             |   |
|             | 0.892536992                                                                                 | 1           | 0.943949007 | 0.9084654   | 0.7831658   | 0.783164817 |   |
| 1.147196641 | 1                                                                                           | 1.343146552 | 1.042782902 |             | 1.139493417 | 0.847139597 | 1 |
| 1.216038128 | 1.354684803                                                                                 | 1.06236427  | 0.909904606 | 0.789522887 | 0.999962573 |             |   |
| YOR210W     | YOR210W::RPB10::RNA polymerase II subunit                                                   |             |             |             |             |             |   |
|             |                                                                                             |             |             | 0.866826043 |             |             |   |
| 1.109208706 | 0.678714615                                                                                 | 1.274617683 |             | 0.682850605 | 0.678800044 |             |   |
| 1.181882186 | 1.107689236                                                                                 |             | 0.747491846 | 0.771075664 | 0.706982452 |             |   |
| 0.898711885 | 1                                                                                           | 0.861080827 | 0.375527289 | 0.431585586 | 0.852601261 | 1           |   |
| 1.762543925 | 1.793251657                                                                                 | 1.472973961 | 1.101811717 | 1           | 0.941920556 |             |   |
| 0.967141031 | 0.571832146                                                                                 | 0.789505871 | 1.117098541 | 1           | 0.891997308 |             |   |
| 1.239842575 | 0.808612498                                                                                 | 1.031637809 | 1.978598156 | 1           | 0.838192538 |             |   |
| 1.143093449 | 0.88629993                                                                                  | 1.612532916 | 1.230647287 | 1.407127762 |             |             |   |
| YMR179W     | YMR179W::SPT21::involved in transcriptional regulation of Ty1 LTRs                          |             |             |             |             |             |   |
| 0.840969056 | 0.805144346                                                                                 | 0.986204805 | 0.980926913 |             | 0.812398493 |             |   |
| 0.883761654 | 0.831386451                                                                                 |             | 0.731818616 | 0.78799917  | 0.698802456 |             |   |
| 1.234505165 | 1                                                                                           | 5.364591965 |             | 1.167717568 |             | 0.24913174  |   |
|             | 1                                                                                           | 0.855591493 | 1.171944661 | 1.103515589 | 0.669930669 |             |   |
| 1.202462691 | 1                                                                                           | 1.203309885 | 1.567569577 | 1.429634959 | 1.320821933 |             |   |
| 0.947783753 |                                                                                             | 0.985151274 | 1.443742426 | 0.918610753 | 0.906396119 |             |   |
| 0.887027476 | 1.056002518                                                                                 |             |             |             |             |             |   |
| YOR212W     | YOR212W::STE4::beta subunit of G protein coupled to mating factor receptor                  |             |             |             |             |             |   |
| 1           | 0.98394083                                                                                  | 0.845870655 | 1.003024007 | 0.841095807 | 1           |             |   |
| 0.976459914 | 0.981235972                                                                                 | 0.908252903 | 0.853911414 | 1           | 0.755158334 |             |   |

|             |                                                                                                              |             |             |             |             |
|-------------|--------------------------------------------------------------------------------------------------------------|-------------|-------------|-------------|-------------|
| 0.818855139 | 0.603474109                                                                                                  | 0.877289912 | 1           | 0.804529535 | 0.716959453 |
| 0.639726184 | 0.828263819                                                                                                  | 1           | 1.220809529 | 0.70243337  | 0.805399654 |
| 0.972540542 | 1                                                                                                            | 0.887199262 | 0.946681975 | 1.090105891 | 1.115570607 |
| 1.068819866 | 1                                                                                                            | 0.786144639 | 1.016738805 | 1.117284458 | 1.333994118 |
| 1.573015822 | 1                                                                                                            | 0.85723122  | 1.014307844 | 1.146570847 | 1.154123238 |
| 1.303045808 | 1.128679366                                                                                                  |             |             |             |             |
| YMR181C     | YMR181C::YMR181C::molecular_function                                                                         | unknown     | 1           | 1.410922878 |             |
| 1.34919936  | 1.154388056                                                                                                  | 1           | 1.205965752 | 1.257104255 | 1.321606449 |
| 1.297750831 | 1                                                                                                            | 1.670875948 | 1.643430929 | 2.827246424 | 1.569999811 |
| 2.569782311 | 2.543530359                                                                                                  | 2.372806861 | 1           | 1.718228156 | 1.899831477 |
| 2.245249949 | 1.323352769                                                                                                  | 1           | 1.408368208 | 1.561892899 | 1.389133355 |
| 1.22574671  | 1.203693936                                                                                                  | 1           | 1.299799949 | 1.855469321 | 1.895996616 |
| 1.508090534 | 2.173922597                                                                                                  | 1           | 0.97509202  | 1.548796578 | 1.129349658 |
| 1.523489442 | 1.347056802                                                                                                  | 1.351087817 |             |             |             |
| YOR226C     | YOR226C::ISU2::Iron-sulfur cluster nifU-like protein                                                         | 1           |             |             |             |
| 1.264762453 | 1.558209043                                                                                                  | 1.095637364 | 1.532503171 | 1           | 1.045520648 |
| 1.162892627 | 1.569985807                                                                                                  | 1.468137809 | 1           | 5.431414043 | 3.261505834 |
| 1.677245133 | 1.858728776                                                                                                  | 1           | 8.430870347 | 3.613275221 | 2.260686389 |
| 2.787021571 | 1                                                                                                            | 9.414106547 | 4.578190689 | 2.472092219 | 2.198996503 |
| 7.089821571 | 8.657107061                                                                                                  | 6.670073728 | 1.320429983 | 1.094094459 | 1           |
| 4.784858299 | 7.774250305                                                                                                  | 5.710431012 | 3.259982691 | 1.895144221 | 1           |
| 5.780446628 | 6.130456669                                                                                                  | 1.25531937  | 1.063417351 | 1.193800889 | 2.565578378 |
| YMR183C     | YMR183C::SSO2::SSO1 and SSO2 encode syntaxin homologs (post-Golgi t-SNAREs); act in late stages of secretion | 1           | 0.696566766 | 0.754842326 |             |
| 0.710705028 | 0.772041872                                                                                                  | 1           | 0.67781059  | 0.711071376 | 0.691086918 |
| 0.721909436 | 1                                                                                                            | 0.798241649 | 0.809244819 | 0.743612151 | 0.825352668 |
| 1.012152951 | 1.079961399                                                                                                  | 0.787593986 | 0.715916963 | 1           | 1.342160421 |
| 0.745643762 | 1.13649435                                                                                                   | 1           | 1.197788878 | 1.557149263 | 1.438903591 |
| 1.385350259 | 1.112264555                                                                                                  | 1           | 1.073488396 | 1.138009469 | 1.318023911 |
| 1.267218818 | 0.973292242                                                                                                  | 1           | 1.022629612 | 1.092816732 | 1.337166928 |
| 1.016658635 | 1.076278071                                                                                                  | 0.890509573 |             |             |             |
| YMR185W     | YMR185W::YMR185W::molecular_function                                                                         | unknown     | 1           | 1.027783115 |             |
| 0.77963519  | 0.986913697                                                                                                  | 1.043347958 | 1           | 0.843044418 | 0.940233238 |
| 0.863349954 | 0.980156332                                                                                                  | 1           | 0.757343482 | 0.711725811 | 0.593468615 |
| 1.238284317 | 1                                                                                                            | 0.897256005 | 1.070677379 | 0.788248521 | 1           |
| 1.266758834 | 1.096125542                                                                                                  | 0.745914888 |             | 0.857086996 | 0.712390364 |
| 0.883024937 | 0.937559692                                                                                                  | 0.992276207 |             | 0.745542731 | 0.898165158 |
| 0.718803492 | 1.140780628                                                                                                  | 1.082051379 | 1           | 0.767770536 | 0.887106039 |
| 1.289410846 | 1.250966663                                                                                                  | 0.778369744 | 0.87825089  |             |             |
| YMR200W     | YMR200W::ROT1::Reversal of tor2 lethality                                                                    | 1           | 1.125234065 |             |             |
| 1.075606631 | 1.030056613                                                                                                  | 1.045755527 | 1           | 1.033770501 | 0.988975446 |
| 1.194625807 | 1.018468724                                                                                                  | 1           | 1.216989225 | 1.267223118 | 1.262602369 |
| 1.347996795 | 1                                                                                                            | 1.431836849 | 1.14056213  | 1.152671033 | 1.301387092 |
| 1.530948542 | 0.71264809                                                                                                   | 1.078059137 | 1.634050509 | 1           | 1.061980519 |
| 1.198819353 | 1.491908618                                                                                                  | 1.300232903 | 1.179661648 | 1           | 1.024080006 |
| 1.224744026 | 1.095548742                                                                                                  | 1.048896429 | 1.043068355 | 1           | 0.95075611  |
| 0.93468813  | 1.17816124                                                                                                   | 1.15943909  | 0.878223607 | 1.12430125  |             |
| YIL039W     | YIL039W::YIL039W::molecular_function                                                                         | unknown     | 1           | 0.944755504 |             |
| 0.809262464 | 1.006133607                                                                                                  | 0.670917252 | 1           | 0.9490383   | 0.826497715 |
| 1.047837843 | 0.913962249                                                                                                  | 1           | 0.956607184 | 0.940691273 | 0.720360909 |
| 1.084074161 | 1                                                                                                            | 0.817673459 | 1.701488671 | 1.462893444 | 0.532583047 |
| 0.837522919 | 0.411180562                                                                                                  | 0.400121748 | 0.505239933 | 1           | 1.000542304 |
| 1.021606613 | 1.121419602                                                                                                  | 1.114497267 | 1.042226923 | 1           | 0.902430014 |
| 0.717521781 | 0.783630975                                                                                                  | 0.843118431 | 0.65634286  | 1           | 0.726781298 |
| 0.633304426 | 0.934742167                                                                                                  | 0.62995164  | 0.790552569 | 0.900141469 |             |
| YIL053W     | YIL053W::RHR2::DL-glycerol-3-phosphatase                                                                     | 1           | 0.957956972 |             |             |
| 0.870012697 | 0.690487671                                                                                                  | 0.792782436 | 1           | 0.809442417 | 0.818813315 |

|             |                                                             |                                             |             |             |             |             |  |
|-------------|-------------------------------------------------------------|---------------------------------------------|-------------|-------------|-------------|-------------|--|
| 0.848590495 | 0.866847092                                                 | 1                                           | 0.918381082 | 0.908963701 | 0.838293199 |             |  |
| 0.805106892 | 1                                                           | 1.465400194                                 | 1.054569542 | 0.563754412 | 0.797591244 | 1           |  |
| 1.646591633 | 1.289724365                                                 | 0.694181027                                 | 0.980488501 | 1           | 1.097057433 |             |  |
| 0.977144459 | 0.764297866                                                 | 1.281600052                                 | 0.98820045  | 1           | 0.878511548 |             |  |
| 1.272287843 | 0.650400399                                                 | 0.903333555                                 | 1.095429304 | 1           | 1.208227102 |             |  |
| 1.432226197 | 0.69671066                                                  | 1.138087225                                 | 0.919025419 | 1.465794598 |             |             |  |
| YIL055C     | YIL055C::YIL055C::molecular_function                        | unknown                                     | 1           | 1.401285829 |             |             |  |
| 1.40998849  | 1.241060392                                                 | 1.487548969                                 | 1           | 1.101553638 | 1.268919069 |             |  |
| 1.472702433 | 1.344237353                                                 | 1                                           | 1.34758714  | 1.461698551 | 1.306156865 |             |  |
|             |                                                             |                                             |             |             | 1           | 1.331447698 |  |
| 1.593928183 | 1.745062888                                                 | 0.887483114                                 | 0.864993309 | 1           | 1.07420204  |             |  |
| 1.291853739 | 1.807873347                                                 | 1.220891293                                 |             |             | 1.164682873 | 1.363851546 |  |
| 1.04894719  | 1.050551105                                                 | 0.921156488                                 |             |             |             |             |  |
| YIL057C     | YIL057C::YIL057C::molecular_function                        | unknown                                     | 1           | 1.435955585 |             |             |  |
| 1.388104494 | 1.105393213                                                 | 1.224445467                                 | 1           | 1.064917053 | 0.966101158 |             |  |
| 1.4234875   | 1.25828698                                                  | 1                                           | 1.245050861 | 1.259448766 | 1.594715358 |             |  |
| 0.911456934 | 1                                                           | 2.367774013                                 | 2.151434057 | 4.21994779  | 1.443043867 | 1           |  |
| 1.735461931 | 3.736202913                                                 | 2.408113988                                 | 0.731532715 | 1           | 1.232970479 |             |  |
| 1.198211661 | 1.012723056                                                 | 1.107955388                                 | 0.875565531 | 1           | 1.013790061 |             |  |
| 1.998793819 | 1.040758822                                                 | 0.862704658                                 | 1.803508683 | 1           | 1.385272848 |             |  |
| 2.866806139 | 1.348384595                                                 | 2.088977066                                 | 2.017638165 | 1.850193439 |             |             |  |
| YOR228C     | YOR228C::YOR228C::molecular_function                        | unknown                                     | 1           | 1.453955206 |             |             |  |
| 1.346531126 | 1.311678466                                                 | 1.111954727                                 | 1           | 1.519855169 | 1.508355676 |             |  |
| 1.369274897 | 1.415028945                                                 | 1                                           | 1.556485899 | 1.572324147 | 1.887604778 |             |  |
| 1.230466859 | 1                                                           | 1.852786199                                 | 1.329117426 |             | 1.076854489 |             |  |
| 1.110391434 | 0.864271548                                                 | 1                                           | 0.822791238 | 0.811225816 |             |             |  |
| 1.237589616 | 1.028547717                                                 | 1                                           | 0.777170737 | 0.522334333 | 0.620262873 |             |  |
| 0.6658636   | 1.006332086                                                 | 1                                           | 0.872070492 | 0.575444235 | 0.91157601  |             |  |
| 0.69211391  | 1.359161894                                                 | 0.98245011                                  |             |             |             |             |  |
| YIL059C     | YIL059C::YIL059C::molecular_function                        | unknown                                     |             | 0.919771363 |             |             |  |
| 1.069350114 | 0.896753077                                                 | 1.10036111                                  |             | 0.966160917 | 0.831475206 |             |  |
| 1.090458558 | 1.017240321                                                 |                                             | 0.977767539 | 1.028100927 | 1.492258724 |             |  |
| 0.932976526 | 1                                                           | 1.481472686                                 |             | 1.548575812 | 1.693257691 | 1           |  |
| 1.365623847 | 2.319472766                                                 | 1.525012337                                 | 1.127497255 | 1           | 0.814597046 |             |  |
| 1.074670369 | 1.011888229                                                 | 0.947052859                                 | 0.991908664 | 1           | 0.939294715 |             |  |
| 1.282947404 | 1.319020457                                                 | 1.413840273                                 |             |             |             |             |  |
| 0.48094489  | 1.129371815                                                 | 1.240759256                                 |             |             |             |             |  |
| YOR230W     | YOR230W::WTM1::WD                                           | repeat containing transcriptional modulator | 1           | 1           |             |             |  |
| 1.334249225 | 0.947059974                                                 | 1.421572007                                 | 0.666103818 | 1           | 1.577416386 |             |  |
| 1.67739459  | 0.919898959                                                 | 0.899253405                                 | 1           | 1.045159148 | 1.098186001 |             |  |
| 0.828973916 | 1.113896316                                                 | 1                                           | 1.048230089 | 1.062167091 | 1.14220857  |             |  |
| 1.026032711 | 1                                                           | 0.729013276                                 | 0.265724474 | 0.387247116 | 1.203271462 | 1           |  |
| 0.978963929 | 0.609806575                                                 | 0.631990006                                 | 1.732434042 | 1.282107323 | 1           |             |  |
| 0.806817245 | 0.339387891                                                 | 0.320397688                                 | 0.430152948 | 1.251986102 | 1           |             |  |
| 0.912636173 | 0.408490374                                                 | 0.820225164                                 | 1.411780708 | 1.794919126 | 0.808200933 |             |  |
| YIL061C     | YIL061C::SNP1::U1snRNP                                      | 70K protein homolog                         | 1           | 1.091487871 |             |             |  |
| 0.847233857 | 1                                                           | 0.953159885                                 | 0.970195417 | 1.013742586 | 0.955824477 | 1           |  |
| 1.137450824 | 0.968878999                                                 | 1.202370243                                 | 0.948420281 |             |             |             |  |
|             | 0.485457634                                                 |                                             | 0.543567    | 1           | 1.061725781 | 1.035943397 |  |
| 0.915763727 | 1.074133486                                                 | 1                                           | 1.133352785 | 1.084885698 | 0.884463795 |             |  |
| 1.109050752 | 1                                                           |                                             | 0.974655428 | 1.041219076 | 0.654050038 |             |  |
| 0.798890791 | 1.193475543                                                 |                                             |             |             |             |             |  |
| YOR232W     | YOR232W::MGE1::involved in protein import into mitochondria | 1                                           |             |             |             |             |  |
| 0.88968754  | 1.096750246                                                 | 1.163232546                                 | 1.354018665 | 1           | 0.889325035 |             |  |
| 1.011192709 | 1.232780053                                                 | 1.342919271                                 | 1           | 0.831790926 | 0.992171838 |             |  |
| 1.069447338 | 0.955609401                                                 |                                             | 0.784593583 | 0.517939465 | 0.585292896 |             |  |
| 0.658768224 | 1                                                           | 1.612389981                                 | 1.413235488 | 1.878221673 | 1.197714335 | 1           |  |

1.014663088 1.243924019 0.91538016 0.877527505 0.975092918 1  
1.18349552 1.661432296 1.126492908 0.776975181 1.451175461 1  
1.228166748 1.411684725 0.921981755 1.433436907 1.708854587 1.277535408  
YIL063C YIL063C::YRB2::Ran-GTPase-binding protein involved in nuclear export  
1 0.790351193 0.658334331 0.806261121 0.711172737 1 0.662675542  
0.629048364 0.791415773 0.64768478 1 0.626521265 0.586244948  
0.647683562 0.653238657  
1 1.124797878 1.000401367 1.270927222 1.185249194 1.36005544 1  
1.339895559 1.291457339 1.051778739 0.909349219 1 0.916139909  
1.043457904 0.934534105 1.118710899 0.703304623 1.579625714  
YMR203W YMR203W::TOM40::Translocase of Outer Mitochondrial membrane 1  
1.327813821 0.915722937 1.021991661 0.827651372 1 1.25218901  
0.755372398 1 1.219737793 0.930990108 0.772790732 0.624429771 1  
0.846426833 0.725417367 0.703324676 0.801227088 1 0.430972882  
0.353135763 0.407626338 0.572198431 1 1.907311384 1.265942575  
2.055617362 1.815433491 1.170989229 1 1.057733093 0.828705684  
1.016112218 0.53597757 0.341460708 1 1.235656821 0.712203904  
0.796659824 0.808425892 0.623080276 0.852857756  
YOR234C YOR234C::RPL33B::Homology to rat L35a 1 0.936282258  
1.131960854 0.830339344 1.702111051 1 0.867432381 1.305899668  
1.33149231 1 0.906671741 0.744474153 1.299836267 1.09203942 1  
0.497843221 0.723436698 0.193976289 0.51971858 1 1.166720597  
0.787972391 0.822114217 1.185986446 1 0.975026743 0.908655907  
0.820005335 1.01930745 1.357950865 1 1.152472939 1.321820549  
1.057855684 0.894146739 1.90189498 1 0.941928614 1.006219746  
0.853139464 1.519811786 0.984067933 1.12167436  
YIL077C YIL077C::YIL077C::molecular\_function unknown 1.014580489  
1.224229404 0.888926089 1.100551727 1.531144567 1.013609681  
0.925552396 1.235772771 1.273491264 1.838154265 0.789065128 1  
0.892893228 0.779523378 1.392246699 1.475897155 1 1.308993001  
1.416358704 1.537255677 0.673998363 1 0.98637093 1.110444751  
1.04032698 0.988321773 1.068382133 1 0.899120064 0.701363988  
0.706640497 0.784325503 0.717844263 1 0.851263226 0.758822578  
0.98043534 1.044674489 0.889634012  
YMR205C YMR205C::PFK2::phosphofructokinase beta subunit 1 0.910291486  
0.623839049 1.597091941 0.595445338 1 1.039909254 1.039851755  
0.735490652 1 1.013287437 0.709965104 0.423782654 0.576771615 1  
1.417742776 1.252516849 1.117635751 0.427476143 1 0.45072311  
0.280874233 0.207773752 0.336781757 1 1.099207648 0.801521604  
0.860848611 1.437573458 0.800451045 1 0.900628046 0.557137085  
0.812847868 0.910638279 0.34375614 1 0.901083536 0.672768756  
0.753150173 0.634806639 0.642243694 0.566528741  
YOR236W YOR236W::DFR1::dihydrofolate reductase 1 0.999675072  
1.064475431 0.855442541 1.31654726 1 0.995585748 0.699696663  
1.055056534 1.392865477 1 0.806920457 0.58020984 0.827117377  
1.148435741 1 0.630717675 0.806683514 0.213432546 1  
1.197621781 0.619995625 0.473454254 0.990076632 1.210877909  
1.048336793 1.005274375 1.058754067 0.963570075 1 0.927630998  
1.114093981 1.125704032 1.312925814 1.42585181 1 0.835172052  
0.955601997 1.001398892 1.071613158 0.723055462 1.136559933  
YIL079C YIL079C::AIR1::<u>a</u>rginine methyltransferase-<u>i</u>nteracting  
<u>R</u>ING finger protein 1 0.634251616 0.596787739 0.764121857  
0.813570792 1 0.602041132 0.595211648 0.863607809 0.97778077 1  
0.499313252 0.38574921 0.426978402 0.770554685 1 0.234965584  
0.385778824 0.637378549 1 0.670940819 0.777868684 1.233853232 1  
0.575744839 0.676251649 0.718090232 0.915457265 0.813975266 1

0.704525047 0.801751458 0.542716758 1.168448659 1.83507975 1  
 0.637261032 0.576872589 0.864518399 0.761125687 1.035863164  
 YMR207C YMR207C::HFA1::Similar to acetyl-coenzyme A carboxylase 1  
 1.198591729 1.133077141 1.238794145 1.147780568 1 1.049651285  
 1.10584095 1.197159489 0.940910943 1 1.020593777 1.005738715  
 1.005556914 0.955099282 1 0.90336651 1.362292473 0.727392829  
 1.093887989 1 1 1.177625587 1.012704817  
 1.129488008 1.040038368 1.148929578 1 0.783221818 0.885374867  
 1.00019664 0.770342584 1 0.799173341 0.928299095 0.799869722  
 0.95510318 0.85837168 1.103286232  
 YOR250C YOR250C::CLP1::cleavage/polyadenylation factor IA subunit; interacts  
 with Pcf11p in the 2-hybrid system 1 1.248192161 1.059314079 1.33565909  
 1.127904998 1 1.268111548 1.421616168 1.097005953 1.022751225 1  
 1.246237725 1.260837049 1.076785742 1.191404492 1 1.513847333  
 0.470011677 0.582104222 1  
 1.017238804 0.881109392 0.872464129 1.047131767 1.010173364 1  
 1.155010967 1.154555276 1.196820637 0.962739701 1.153252198 1  
 0.805141997 0.676043222 0.748929252 0.670751563 0.627605726 1.041116945  
 YIL082W YIL082W::YIL082W::molecular\_function unknown 1 1.251289952  
 1.152111447 1.049393969 1.323885957 1 1.018641356 1.086091518  
 1.090532817 1.14867765 1 0.971629688 1.13293754 1.351856664  
 1.018394675 1.551503623  
 1 1.038181767 1.074520536 1.11817878 0.95917703 0.80557815 1  
 1.032058244 1.255720584 1.160933236 1.17458001 1.542097882 1  
 1.113678581 0.868373984 0.80119729 0.979087915 1.031717678 1.350212256  
 YMR209C YMR209C::YMR209C::molecular\_function unknown 1 1.104887352  
 1.036799636 1.178783112 1.106524933 1 1.138242595 1.033928116  
 1.050381135 1.051454254 1 0.935706626 0.9214785 0.788884377  
 0.993682011 1 0.850657744 0.632186315 0.683167983 0.829103774 1  
 0.647274229 0.462789442 0.61891507 0.645346243 1 0.991090338  
 0.912116989 1.669715735 1.43623112 1.312866329 1 0.855930051  
 0.678436189 1.095572422 1.740859761 0.532631707 1 0.656289546  
 0.414444239 0.61093517 0.696683487 0.334256188 0.754787878  
 YOR252W YOR252W::YOR252W::molecular\_function unknown 1 0.825859987  
 0.904663999 0.961248674 1.36651188 1 0.639595325 0.649788525  
 1.065656737 1.2882513 1 0.747824593 0.534697089 0.902862768  
 1.226108725 1 0.280313848 0.264503704 0.193340299 0.499326145 1  
 0.972450384 0.834191311 0.947764483 1 0.848611534 0.670937237  
 0.519971171 0.69024061 0.916567198 1 0.947934228 1.040433691  
 0.879779731 1.657255422 2.603308092 1 0.752995263 1.099533202  
 1.413499249 1.001132101 0.999962573  
 YMR211W YMR211W::DML1::Drosophila melanogaster Misato-like 1  
 1.245984122 1.05332306 1.264766234 1.278865912 1 1.225179722  
 1.032941989 1.163917878 1.326179446 1 0.899569301 0.900146554  
 0.831520795 1.248553471 1 1 0.493993623  
 0.396206653 1 0.736964613 0.752271171 0.853730177 0.741464914  
 0.715876854 1 1.550935181 1.275204111 1.755632942 3.087669014  
 1.281634821 1 0.862735194 1.095944096 1.047180131 1.127664809  
 0.446084954 0.686489198  
 YOR254C YOR254C::SEC63::Protein involved in protein import into ER 1  
 0.864137896 0.70493855 1.011169668 0.806649722 1 0.990665703  
 0.833000255 0.68981563 0.703985404 1 0.79670913 0.676416294  
 1.155448338 0.935090645 1 0.892040175 0.510407784 0.507575641  
 1.824249726 0.893457009 0.900175671 1.620916855 1 1.086320466  
 0.772076865 1.266556985 1.152188557 1.214039073 1 1.27793308  
 0.930506452 1.298334792 0.682755122 1 1.044806618 0.754346435  
 1.058228612 0.75719885 0.715181715 0.941295842



YMR226C YMR226C::YMR226C::molecular\_function unknown 1 0.896966754  
1.058722104 0.997478837 1.238017077 1 0.875298078 0.900925654  
1.508614183 1.372397066 1 0.843626355 1.051140626 1.643130257  
1.252110915 1 1.334475691 1.310756031 1.478536132 1.885002253 1  
1.535984865 1.555255015 2.165945508 1.960794444 1 1.242649762  
1.126157872 1.192182442 0.927042678 0.863548667 1 1.165540402  
1.726461769 1.105490929 1.151024668 1.35107914 1 1.122766375  
1.283533765 1.150675772 1.337176459 1.031514312 1.540222567  
YOR256C YOR256C::YOR256C::molecular\_function unknown 0.939471995  
0.965717653 1.348484043 1.11210882 1.47103456 1.177465533  
1.086483591 1.077952626 1.305699389 1.27983761 3.257962133  
1.333383007 1 1.228557549 0.784490973 1.042350555 0.714661334 1  
1.427472831 1.049871772 1.299014367 1.215637884 1 1.036289245  
1.323637313 1.260801609 1.106419169 1.107209585 1 1.899098107  
1.608599974 2.336427122 1.806227531 1.413729009 1 1.440485068  
1.017539102 1.329605457 0.923553167 1.094462877 0.884380232  
YMR228W YMR228W::MTF1::Mitochondrial RNA polymerase specificity factor 1  
1.445689379 1.545423656 1.490101066 1.831593127 1 1.354058449  
1.394879536 2.06118308 1.63176641 1 1.058524937 1.264006704  
1.398510567 1.608219402 1 1.138090725 1.21426938 1.578607145  
0.558800148 0.719014824 1 1.033705072 1.022280894  
1.055699218 1.102632459 1.100313283 1 1.119660842 0.833757146  
1.227974525 1 1.161972557 0.86641249 0.921928762 1.371562454  
0.79852009 1.195226768  
YOR258W "YOR258W::HNT3::histidine triad superfamily, third branch"  
0.730153185 0.868918147 0.758102958 1.167909977 0.669532552  
0.690882287 1.232231409 1.035825767 0.726996078 0.954060745  
1.530821393 0.888922005 1 1.028008743 0.962298751 1.166548908  
1.422962138 0.661246878 0.711187259 0.825060095 0.438114999 1  
1.037093107 1.203263935 0.743894501 1.102727396 1 0.9438691  
1.420017944 1.405383278 1.103355937 1.557894454 1 0.979536654  
1.231515199 0.960342494 0.894386641 1.176470513 1.55948636  
YMR231W YMR231W::PEP5::peripheral vacuolar membrane protein; putative Zn-  
finger protein 1 1.123995555 1.151517834 1.325691034 1  
1.300093324 1.352189691 0.887201651 1 1.251664668 1.238451183  
0.577159453 1.076508197 1 1.041297375 0.717055532 1.138913058 1  
0.862110061 1.009647609 0.996406896 1 1.271518724 1.432693679  
1.320574451 1.576720239 1.325664938 1 1.268549949 0.696877581  
1.286663315 0.947806359 0.503279034 1 1.116014258 0.669058482  
1.083219176 0.87995847 0.916899219 0.860738375  
YMR233W YMR233W::TRI1::Topoisomerase 1 and RAD52 epistasis group  
Interactions 1 1.115188177 1.789576156 1.299247064 1.92198458 1  
1.180287688 1.715215074 1 1.091952203 1.196046162  
1.473494806 1.522487109 1 0.859010366 0.92371247 1.215050257 1  
1.215984216 1.78443086 2.003657568 1.671741463 1 1.254134619  
1.188347958 0.676653942 0.938858781 1.331448844 1 0.946810761  
1.389866559 1.365588953 1.279597434 2.027570185 1 1.063185911  
1.419964838 0.77700442 1.803725272 1.089674658 1.543725122  
YMR235C YMR235C::RNA1::Protein involved in RNA processing and export from  
nucleus 1.1143147 1.308881565 0.903203078  
0.862026848 0.859923946 0.731522301 0.970178096 1  
0.854340378 0.660312344 0.754408307 1.170643744 1 0.92465469  
0.817188222 1.084216007 1.33266184 1 1.119028589 1.051737175  
1.104907865 1.143076815 1.179170214 1 1.089168051 0.875150531  
0.863566787 0.690056039 0.707960156 1 1.001016044 0.850507447  
0.764156223 1.155465778 0.691521845 0.744280421

YIL084C      YIL084C::SDS3::Suppressor of Defective Silencing 3<br>Functions are similar to those of SIN3 and RPD3    1      0.662714128 0.684875718 0.891833263  
0.724911439 1      0.812730391 1.023680138 0.651710652 0.587786385 1  
0.761512504 0.800280644 0.304662782 0.714400983      0.96236038  
0.874714891 0.919899651 0.882941985 1      1.605206666 1.867085755  
1.799568745 1      0.949169433      0.86098685 0.878962803 0.891347866 1  
0.869194791      0.856550598 0.998161459 1.001658434 1      0.878059909  
0.851083041 1.003994401 0.724662954 0.986042705  
YIL086C      YIL086C::YIL086C::molecular\_function unknown      1.179572951  
0.972787025      0.898360156      0.785713133  
0.808979077      1.121921421  
1      1.120711996 1.083443008 1.535596777 1.212863211  
0.94682498 1      1.067628557 1.561711066 1.320072488 1.436642979  
1.68746599 1      0.941554766 1.048278952 0.632953047 1.378579667  
0.635165935 1.199604884  
YIL088C      YIL088C::YIL088C::molecular\_function unknown    1      1.276069768  
0.977950966 1.373865478 0.961807269 1      1.342270069 1.641564692  
1.098860942 1.010879546 1      1.28345104 1.335896807 0.940509905  
1.044577621 1      1.249195488      1.056719339 0.700630606 1  
1.341453366      1      1.092625996 1.41671228 1.4473931  
1.177715097 1.105746348 1      1.024793529 1.147592761 1.246292444  
0.960367489 0.854089241 1      0.988299389 1.136587217 1.08574258  
1.012205929 1.626172829 0.815205939  
YIL102C      YIL102C::YIL102C::molecular\_function unknown      1.122933745  
1.053359122  
1      1.942921313 1.962078648 1.533408096 1  
2.32094592 1      0.96005349      1  
0.967663342      1.354890717      1      0.847002306 1.150812558  
1.178092589 0.757332817      1.557735134  
YOR260W      YOR260W::GCD1::general control of amino acid biosynthesis and cell cycle initiation 1      0.897582807 0.67906434      0.614218545 1  
0.88259572 0.741320228 0.667436075 0.628197657 1      0.84036811  
0.700879319      0.778614129 1      0.750433225 0.554923885 0.625177516  
0.590965117 1      0.565360388 0.386928991 0.416304528 0.894964385 1  
0.921254903 0.938164924 0.979011784 1.013461944 0.886308023 1  
0.796474452 0.748148935 0.711908757 0.616651895 0.511697661 1  
0.754166561 0.714519738 0.810052328 0.68954131 0.545132504 0.706628552  
YIL104C      YIL104C::SHQ1::required for SnRNAs of the box H/ACA Quantitative accumulation 1      1.408886646 1.205349049 1.132825425 1.221690446 1  
1.127049953 1.114111118 1.111802163 1.320272176 1      1.117995092  
0.994699751 1.125408413 0.900825468 1      0.925109358 0.596684241  
0.870390073 0.581343597 1      0.714170439 0.374348432 0.693513806 1  
1.145780793 0.977743726 0.948015316 1.050386495 0.800938984 1  
0.995709893 1.195286058 1.106180637 0.493903883 0.854461759 1  
0.95483363 1.216077984 0.86243022 1.324165508 1.387110417 0.815205939  
YOR274W      YOR274W::MOD5::transfer RNA isopentenyl transferase 1  
0.690965754 0.750936972 0.872924241 0.816113605 1      0.725964807  
0.676426381 0.93367369 0.937661288 1      0.701283677 0.797741254  
0.744601531 0.933198182 1      0.71286657 0.805649984 0.847724075  
1.005651035 1      0.958123783 1.083992543      0.604060957 1  
0.960622356 0.993205127      0.995571303 1.190935654 1      0.873915687  
1.085883188 0.878690498 1.601541276 1.305767911 1      0.791607229  
1.009478648 1.23624335 0.585210337 0.662913211 1.010470134  
YIL106W      YIL106W::MOB1::Mps One Binder 1      1.414067063 1.529990422  
0.955565443 1.01500458 1      1.340741512 1.501034674 1.290442884  
1.201959658 1      1.175752849 1.319238865 1.739397771 0.925833689 1  
0.859305397 0.822651009 0.574422084 0.634373607 1      1.007959395

|             |                                                                                                                                                                            |             |             |             |                         |
|-------------|----------------------------------------------------------------------------------------------------------------------------------------------------------------------------|-------------|-------------|-------------|-------------------------|
| 1.067676845 | 1                                                                                                                                                                          | 0.862317806 | 0.731674949 | 0.649413082 | 0.894804119             |
| 0.824418897 | 1                                                                                                                                                                          | 0.706466682 | 0.62281582  | 0.48997965  | 0.751537911             |
| 1.50126831  | 1                                                                                                                                                                          | 0.855350962 | 0.724177258 | 0.917937771 | 0.917348533             |
| 2.442305253 |                                                                                                                                                                            | 0.873872775 |             |             |                         |
| YOR276W     | "YOR276W::CAF20::binds to eIF-4E, the mRNA cap-binding protein, and represses cap-dependent translation initiation by interfering with the interaction of eIF4E and eIF4G" |             |             |             |                         |
|             |                                                                                                                                                                            | 0.858207072 | 1.019242088 | 0.834136907 |                         |
| 1.129730269 |                                                                                                                                                                            | 0.771233765 | 0.762277114 | 1.041434298 | 1.068040398             |
| 0.835502998 | 0.750979047                                                                                                                                                                | 0.821501909 | 0.937871466 | 1           | 0.865763488             |
| 0.462144452 | 0.426661444                                                                                                                                                                | 0.749909529 | 1           | 1.448993791 | 0.858976091             |
| 0.953962459 | 1.079006674                                                                                                                                                                | 1           | 1.006424836 | 0.95727195  | 0.861359417             |
| 1.121070123 | 0.991466047                                                                                                                                                                | 1           | 0.916880146 | 1.31120636  | 0.831886665             |
| 0.802929137 | 1.264812001                                                                                                                                                                | 1           | 0.980402779 | 1.015327133 | 0.90817308              |
| 1.271791926 | 0.867295109                                                                                                                                                                | 1.050748842 |             |             |                         |
| YIL108W     | YIL108W::YIL108W::molecular_function unknown 1 1.450029895                                                                                                                 |             |             |             |                         |
| 1.367157976 | 1.579124636                                                                                                                                                                | 0.938118623 | 1           | 1.807635398 | 1.750343395             |
| 1.124352967 | 1.209975559                                                                                                                                                                | 1           | 2.437383481 | 2.671727592 | 1.748247428             |
| 1.852411929 | 1                                                                                                                                                                          | 1.287842377 | 1.023561098 | 1.256669948 | 0.633666313 1           |
| 0.926075633 | 0.749241254                                                                                                                                                                | 0.55960354  | 0.779040682 | 1           | 1.020907743             |
| 1.061792093 | 1.268256169                                                                                                                                                                | 1.131767442 | 0.88122164  | 1           | 1.187347959             |
| 0.83221182  | 1.188502736                                                                                                                                                                | 1.152560379 | 0.586708906 | 1           | 0.949455158             |
| 1.038485869 | 0.987959029                                                                                                                                                                | 0.737531403 | 0.854351204 | 0.688240476 |                         |
| YMR237W     | YMR237W::YMR237W::molecular_function unknown 1 1.409500525                                                                                                                 |             |             |             |                         |
| 1.404746964 | 1.791977317                                                                                                                                                                | 1.363091644 | 1           | 1.880010763 | 1.924529311             |
| 1.009254537 | 1                                                                                                                                                                          | 1.477774265 | 1.518864395 | 0.849940911 | 1.329575141 1           |
| 1.116923745 | 1.126543086                                                                                                                                                                |             | 0.563211379 | 1           | 0.931029271 0.751830789 |
| 0.872692145 | 1.159230679                                                                                                                                                                | 1           | 0.8947605   | 1.023780543 | 1.085798632             |
| 0.916811495 | 0.814009405                                                                                                                                                                | 1           | 1.040183393 | 0.640183126 | 0.919883522             |
| 0.347346469 | 1                                                                                                                                                                          | 0.890615966 | 0.67448088  | 0.906963484 | 0.614312622             |
| 0.698918509 | 0.47896632                                                                                                                                                                 |             |             |             |                         |
| YOR278W     | YOR278W::HEM4::catalyzes the fourth step in the heme biosynthesis pathway 1 0.895891701 0.936469658 0.929437899 1.054820247 1                                              |             |             |             |                         |
| 0.842024834 |                                                                                                                                                                            | 1.176259255 | 1           | 0.90274912  | 0.826172105 1.154941317 |
| 1.237011922 | 1                                                                                                                                                                          | 1.010809431 | 0.891815639 | 0.93869476  | 1.358350425 1           |
| 0.983834225 | 0.896071551                                                                                                                                                                | 1.356877266 | 1.097128794 | 1           | 0.871566146             |
| 0.82873679  | 0.815972779                                                                                                                                                                | 1.078461925 | 1.052206245 | 1           | 0.859201656             |
| 0.959014033 | 0.809650533                                                                                                                                                                | 0.788338669 | 1.232959713 | 1           | 0.851861652             |
| 0.811763232 | 0.946160478                                                                                                                                                                | 1.031005139 | 0.941857905 | 1.217993012 |                         |
| YIL110W     | YIL110W::YIL110W::molecular_function unknown 1 1.120148821                                                                                                                 |             |             |             |                         |
| 0.929242854 | 0.988220409                                                                                                                                                                | 1.045875515 | 1           | 0.977049821 | 0.914874378             |
| 0.963514884 | 0.9479761                                                                                                                                                                  | 1           | 0.713166688 | 0.739620739 | 0.791488532             |
| 0.823240973 | 1                                                                                                                                                                          | 0.531582959 | 0.365973423 | 0.612908621 | 0.660727389 1           |
| 0.508780319 | 0.786623214                                                                                                                                                                | 0.47143966  | 0.570391207 | 1           | 0.792482397             |
| 0.715588759 | 0.552162558                                                                                                                                                                | 0.935604779 | 0.887627383 | 1           | 1.007469704             |
| 0.896744033 | 0.540574646                                                                                                                                                                | 0.835705537 | 1.357503944 | 1           |                         |
| 0.925554256 | 1.182302265                                                                                                                                                                | 0.812074828 | 1.114669354 |             |                         |
| YMR253C     | YMR253C::YMR253C::not yet annotated 1 1.128617517 1.113713182                                                                                                              |             |             |             |                         |
| 1.226787018 | 1.010639148                                                                                                                                                                | 1           | 1.256901805 | 1.304256744 | 0.980841526 1           |
| 1.409283767 | 1.404090816                                                                                                                                                                | 1.237475655 | 0.948343321 |             | 1.625960832             |
| 1.172437791 | 1.294314864                                                                                                                                                                | 0.955832795 |             | 0.711306039 | 0.676522516             |
| 1           | 1.13226866                                                                                                                                                                 | 1.252273898 | 0.830415336 | 1.212671165 | 1                       |
| 1.712079914 | 1.291960007                                                                                                                                                                | 2.190326163 | 1.552589783 | 0.805360919 | 1                       |
| 1.296888918 | 0.896418176                                                                                                                                                                | 1.089847622 | 0.956116926 | 0.902287154 | 1.351963482             |
| YOR280C     | YOR280C::FSH3 1 0.993621874 1.202335729 0.97150704                                                                                                                         |             |             |             |                         |
| 1.529533837 | 1                                                                                                                                                                          | 0.866217792 | 0.889202327 | 1.484282726 | 1.247438055 1           |
| 1.008665069 | 1.262606428                                                                                                                                                                | 1.509414375 | 1.451319961 | 1           | 1.363296467             |
| 0.999491436 | 1.12010965                                                                                                                                                                 | 1.659337898 | 1           | 1.898196399 | 1.50306639              |

|             |                                                                                                |             |             |             |             |
|-------------|------------------------------------------------------------------------------------------------|-------------|-------------|-------------|-------------|
| 2.039899889 | 1.369421309                                                                                    | 1           | 0.9093967   | 1.046601205 | 0.890579504 |
| 0.814022537 | 0.91872621                                                                                     | 1           | 1.115970089 | 1.413206309 | 1.395045885 |
| 1.710853519 | 1.348352751                                                                                    | 1           | 1.19544311  | 1.400965131 | 1.141838356 |
| 1.276944248 | 1.320102961                                                                                    | 1.239007927 |             |             |             |
| YIL112W     | YIL112W::YIL112W::molecular_function                                                           | unknown     | 1           | 1.425152654 |             |
| 1.439941652 | 1.168458129                                                                                    | 1.433837156 | 1           | 1.265205951 | 1.141779593 |
| 1.419122943 | 1                                                                                              | 1.172251106 | 1.304033732 | 1.530439847 | 1.190861071 |
| 1.279849569 | 0.701695738                                                                                    | 0.863043865 | 1.096039919 | 1           | 1.115185069 |
| 1.098992908 | 0.999795604                                                                                    | 0.96700793  | 1           | 0.976100647 | 0.870863234 |
| 0.664703257 | 0.784759809                                                                                    | 0.958384708 | 1           | 1.014251315 | 1.075621232 |
| 0.924490069 | 1.628538262                                                                                    | 1           | 1.175733958 | 1.249347345 | 1.062593342 |
| 1.709523153 | 1.251009426                                                                                    | 1.150569945 |             |             |             |
| YMR257C     | YMR257C::PET111::translational activator of cytochrome c oxidase subunit II                    | 1           | 1.285093286 | 1.178760418 | 1.596886001 |
| 1.50830686  | 1.640393274                                                                                    | 1.030221522 | 1           | 1.161752113 | 1.192566313 |
| 1.029558955 | 1.279926822                                                                                    | 1           | 1.047318445 | 0.973923887 | 0.576995346 |
| 0.769215539 | 1.085537458                                                                                    | 1           | 0.829595769 | 0.859060316 |             |
| 0.918511646 | 0.989512077                                                                                    | 0.880116874 | 1           | 0.784906604 | 0.708433103 |
| 0.893374896 | 1.242165678                                                                                    | 0.667167914 | 1           | 1.005338853 | 1.021094923 |
| 1.012833575 | 0.855522237                                                                                    | 0.58841932  |             |             |             |
| YOR282W     | YOR282W::YOR282W::molecular_function                                                           | unknown     |             | 0.828656124 |             |
| 1.007449572 | 0.98386384                                                                                     | 0.807555571 | 0.850147656 | 0.814862713 |             |
| 0.987503711 | 0.854793078                                                                                    | 0.78799917  | 1.524978569 | 1.134648289 | 1           |
| 0.471222103 | 0.479973466                                                                                    | 0.59213731  | 0.720553513 | 1           | 1.021199791 |
| 2.284508732 | 2.181327584                                                                                    | 1           | 0.997354199 | 0.805725458 | 1.060425474 |
| 0.973957562 | 1.300300886                                                                                    | 1           | 0.803412338 | 1.342413681 | 1.117381103 |
| 1.233448222 | 1.614393835                                                                                    | 1           | 0.953840738 | 0.948328193 | 0.250084026 |
| 1.11912343  | 1.200480549                                                                                    |             |             |             |             |
| YIL126W     | "YIL126W::STH1::helicase related protein, snf2 homolog"                                        |             |             |             |             |
| 0.945218921 |                                                                                                | 0.865525002 | 0.944710739 |             |             |
| 0.836708615 | 0.911752042                                                                                    | 1.000292503 | 1.154087849 |             |             |
|             |                                                                                                | 1           | 0.851176406 | 0.85295215  |             |
| 1.02588199  | 1.027934279                                                                                    | 1           | 0.879886461 | 0.90260078  | 0.49399914  |
| 0.807453432 | 1.14065993                                                                                     | 1           | 1.11419891  | 0.993550013 | 1.066556933 |
| 1.258063433 | 0.941633191                                                                                    | 1.188221762 |             |             |             |
| YMR259C     | YMR259C::YMR259C::molecular_function                                                           | unknown     | 1           | 1.247145342 |             |
| 1.712794464 | 1.146548048                                                                                    | 1           | 1.436712745 | 1.329543503 | 1           |
| 1.003044387 | 0.961813905                                                                                    | 0.809476887 | 1.388936171 | 1           | 0.768156503 |
| 0.9554297   | 1                                                                                              | 0.550289194 | 0.980963826 | 1           |             |
| 0.628497876 | 0.610712058                                                                                    | 0.751686304 | 0.856749543 | 0.678698578 | 1           |
| 1.255819284 | 0.825438104                                                                                    | 0.916701924 | 1.506218764 | 0.808300931 | 1           |
| 0.989126966 | 0.815192589                                                                                    | 0.912643001 | 0.745296474 | 1.025355707 |             |
| YOR284W     | YOR284W::YOR284W::molecular_function                                                           | unknown     | 1           | 0.939191072 |             |
| 0.980024807 | 1.084320469                                                                                    | 1           | 1.004518826 | 0.967840141 | 1.247977865 |
| 0.966776511 | 1                                                                                              | 0.829025088 | 0.798086387 | 1.09103075  | 1.182094703 |
| 0.665322724 | 0.281752854                                                                                    | 0.589692289 | 1.525920401 | 1           | 0.792620405 |
| 1.760764318 | 1.800638271                                                                                    | 1           | 1.087693087 | 0.989292069 | 1.161580441 |
| 1.242316692 | 1                                                                                              | 0.833450256 | 1.130781792 | 1.394115381 | 1.238856782 |
| 1.246646668 | 1                                                                                              | 1.073556454 | 1.111991922 | 0.661271428 | 1.154531095 |
| 1.544600787 |                                                                                                |             |             |             |             |
| YMR261C     | YMR261C::TPS3::115 kD regulatory subunit of trehalose-6-phosphate synthase/phosphatase complex | 1           | 1.224404078 | 1.559684938 | 1.003654471 |
| 1.633626107 | 1.414365416                                                                                    | 0.92827346  | 1           | 1.23454727  | 1.363305288 |
| 0.789088539 | 1.061579273                                                                                    |             |             |             | 0.526203475 |
|             |                                                                                                | 0.811793709 | 0.6183195   |             |             |
| 1.459214175 | 1.412405031                                                                                    | 1.121382714 | 1           | 1.080825346 | 1.222394472 |
|             | 3.161878317                                                                                    |             |             |             |             |

YMR261C YMR261C::TPS3::115 kD regulatory subunit of trehalose-6-phosphate synthase/phosphatase complex

1 0.743735081 0.887286098 0.87268226 0.780450764  
0.804371948 1 1.018926436 1.005186638 1.2474456 1.283841553  
0.847016756 1 0.939539588 1.134245669 0.945057816 1.634605888  
0.866346934

YOR298W YOR298W::YOR298W::not yet annotated 1 2.287055148 2.42554224  
1.451523296 1.759794416 1 1.281854717 1.217313779 1.91417747  
1.414100822 1 1.194347869 1.827131453 4.222933559 2.046737313 1  
1.032360934 3.447907718 1.14103212 0.956424781 1 1.75642162  
3.875053795 3.375899361 1.378792364 1 1.257661464 1.184016932  
1.110945952 1.377025778 1 0.897730513 0.946756457 0.68269349  
0.643793379 0.902805584 1 1.128990792 1.610366311 1.047646329  
0.726604952 1.065277228 1.716223073

YMR263W YMR263W::SAP30 1 0.688700414 1.204829288 0.924792779 1  
0.838626949 0.884633894 1.220814367 1.2893565 1 0.984081632  
1.136225439 1.29710339 1.178998409 1 0.826594286 0.670738163  
0.605320392 1.155117993 1 1.310717614 1.479860171 1.471745097  
0.95342175 1 1.076460153 0.952013674 0.811869043 0.733209314  
1.156203463 1 1.320597018 1.501948843 1.449349942 1.268573359  
1.24525154 1 1.584815605 1.199811424 1.458944606 1.585528579  
1.437686496 1.071763756

YOR300W YOR300W::YOR300W::molecular\_function unknown 1 1.353894392  
1.534698608 1.677605886 1 1.190285142 0.953578357 1.561125642  
1.879630343 1 1.221745267 1.246229475 1.633113295 1.759078922 1  
1.453824823 1.912376003 1.140858069 1.144706897 1 1.692895372  
3.967792345 1.383749998 1 1.020937898 1.033678705 0.78591945  
0.941587876 1 0.691413516 1.075979598 0.904246789 0.781104071  
1.425680862 1 1.307573257 1.034140856 1.072476625 1.176940701  
1.091027549

YMR265C YMR265C::YMR265C::molecular\_function unknown 1 1.739624926  
1.633765383 1.529074845 1.816366372 1 1.453662056  
1.968536166 1 1.911107356 1.590314035 1.73154653 1.661929262 1  
1.406079682 0.763459372 0.939926991 1.261555176 1 2.348180474  
1.019617149 1.220889337 1 1.449071304 1.22053024 1.381201649  
1.109315392 1.208820701 1 1.352851867 0.927389498 1.27256092  
1.140590904 0.476939236 1 1.199495894 1.034795539 1.013882473  
1.092442886 0.883793928 1.013972585

YOR302W YOR302W::YOR302W::molecular\_function unknown 1 1.664604363  
1.200626562 1.286507736 0.997820907 1 1.279467805 1.229426261  
0.876578944 1 2.064164257 1.298993631 0.764330146 1.395753451 1  
1.645104279 0.229014624 0.752459143 0.39000239 1 1.02761035  
0.375596413 0.83410916 1 0.97431432 1.169702409 1.238952774  
1.193388043 1.10122693 1 0.871416327 0.769017504 1.088395804  
0.655106286 1 0.902651615 0.78784353 1.566701364 0.53574125  
0.633279847 1.72410364

YMR280C YMR280C::CAT8::Zinc-cluster protein involved in activating gluconeogenic genes; related to Gal4p 1 1.735779283  
1.274635406 1 1 1.426528862  
1 1  
0.894572961 0.679435031 0.825305619 0.966222367 0.821605578 1  
0.970133919 0.978506558 0.726729714 0.894870907 1.092457808 1  
0.834363033 0.86097477 0.865976392 1.231276252 0.640741638 1.015723811

YMR282C YMR282C::AEP2::Required for the translation of OLI1 mRNA. 1  
1.087635584 1.049916735 1.35585819 1.160416696 1 1.244055255  
1.310691977 1.390035283 1.250623826 1 1.026645595 1.019580877

0.995082361 1.021498788 1 0.818698256 0.824002664 0.804211432  
 0.62269526 1 1.435945538 1.396277852 1.153492125 1.175586338 1  
 0.750441096 0.896394388 0.761446916 0.754791851 0.864473013 1  
 0.829064727 0.87279109 0.918159417 1.238059153 1  
 0.808123277 1.062494937 0.962623662 1.17023082 0.877375225  
 YMR284W "YMR284W::YKU70::Shows homology to 70-kDa subunit of mammalian Ku  
 protein, the regulatory subunit of the DNA-dependent protein kinase" 1  
 1.115972729 1.507690731 1.14459561 1.719884112 1 1.171735076  
 1.43575008 1.508052734 1.242380022 1 1.392418824 1.864139571  
 1.538914691 1.395896326 0.922339553 0.943569534  
 0.976736097 0.71789662 1.109963844 0.997462129 0.661768302  
 0.8941385 0.885203703 0.829608008 0.919430279 1.033255046  
 0.792542304 0.985075107 1 1.029747111 1.290258759 0.776777486  
 1.000056228 0.588584491  
 YMR284W "YMR284W::YKU70::Shows homology to 70-kDa subunit of mammalian Ku  
 protein, the regulatory subunit of the DNA-dependent protein kinase"

1

0.919487285 1.338954305 0.829609739 0.762168491 1.170195906 1  
 0.819713484 0.876213844 0.952720625 1.105754998 1 1.244916782  
 1.313243164 1.555910461 1.334161179 0.881753341  
 YIL128W YIL128W::MET18::Involved in nucleotide excision repair and  
 regulation of TFIIH 1 1.839145839 2.008041593 1.389075667 1.972273193 1  
 1.400436209 1.344515151 1.853589552 1 1.456033318 1.470066751  
 2.488346152 1.4605107 1 1.471511238 1.117500832 1.856449939  
 1.991476475 1 1.665530047 2.590285507 2.621099441 1.482370588 1  
 0.808995082 0.870404067 0.728264427 0.936215282 0.832410838 1  
 0.89656163 0.836833476 0.691571663 0.745675243 0.81072287 1  
 1.028179463 1.146790765 1.234198167 1.221206922 0.976320768  
 YIL130W YIL130W::GIN1::Gcn5 INdependent 1 1.113983523 1.026581903  
 1.196554587 0.958618695 1 1.20810424 1.135703183 1.020244101  
 0.936416263 1 0.933627488 0.886278778 0.720611349 0.977939728  
 0.864635183 0.938688394 0.889774286 0.833431203 1 0.685052305  
 0.504602628 1 0.776490241 0.724536325 0.617804089 0.884806713  
 0.96581421 1 0.685718514 0.558774888 0.409722943 0.556148437  
 0.675708345 1 0.713058628 0.696003799 1.018416859 0.962797934  
 0.960427362 0.862489653  
 YIL132C YIL132C::CSM2::Chromosome segregation in meiosis 1  
 1.339716088 1.351183839 1.461156727 1.205685812 1 1.328931285  
 1.447340929 1.646317538 1.3582984 1 1.076138959 1.001943286  
 1.194800147 1.530890984 1 0.713060428 0.924212347  
 0.406294291 0.424039693 0.347882872 0.841109344  
 0.893929701 1.046817951 1 1.000914207 0.802930567 1.812390774  
 1 0.863604546 1.354446595 0.926410164  
 YIL134W YIL134W::FLX1::Nuclear-encoded mitochondrial protein involved in  
 transport of flavine into mitochondria 1 1.53240168 1.270753698  
 1.238501384 1.50789435 1 1.218381751 1.209090805 1.547418548  
 1.287572372 1 1.074596006 0.984754227 1.148754271  
 0.754810666 0.522890318 0.709654247 1  
 1.610074043 1 0.902427665 0.897227852 0.897205364 0.996141337  
 0.871545952 1 0.780572857 0.828471424 0.636074362 0.638791985  
 1.37010043 1 0.993503408 0.970324207 0.781577488 1.035436262  
 1.249343209 0.92991272  
 YOR304W YOR304W::ISW2::has strong homology to Drosophila ISWI 1  
 0.784484563 0.993811232 0.929357529 1.007412403 1 0.963063567  
 1.03168567 0.983596137 1.032220211 1 0.750681345 0.839310143  
 0.858457986 1.049960603 1 0.828500219 0.781848151 0.61036353

|             |                                                                                       |             |             |             |             |             |            |
|-------------|---------------------------------------------------------------------------------------|-------------|-------------|-------------|-------------|-------------|------------|
| 0.723922054 | 1                                                                                     | 1.218113622 | 0.995304324 | 0.819866551 | 1           |             |            |
| 0.971068832 | 1.035051439                                                                           | 0.973388992 | 1.049668357 | 1.214401577 | 1           |             |            |
| 0.908284373 | 0.910448731                                                                           | 0.671182106 | 1.003579858 | 0.816716363 | 1           |             |            |
| 0.976441075 | 0.900665744                                                                           | 1.134818131 | 1.026295545 | 0.92816139  |             |             |            |
| YIL136W     | YIL136W::OM45::45-kDa mitochondrial outer membrane protein                            |             |             |             | 1           |             |            |
| 1.322079212 | 2.225595231                                                                           | 2.521811443 | 1.832154833 | 1           | 1.676640928 |             |            |
| 2.670124958 | 2.433183205                                                                           | 2.623477037 | 1           | 1.518353418 | 2.648222354 |             |            |
| 5.168445861 | 2.848985238                                                                           | 1           | 3.160315991 | 3.83961467  | 5.511948773 |             |            |
| 4.100633619 | 1                                                                                     | 2.943315342 | 5.986756121 | 3.716192645 | 1           |             |            |
| 0.894247838 | 1.48039388                                                                            | 1.365397209 | 0.763042557 | 1.026402401 | 1           |             |            |
| 1.137831233 | 1.535992491                                                                           | 3.488718057 | 2.70916255  | 2.676421198 | 1           |             |            |
| 1.315409456 | 1.173728514                                                                           | 1.639794349 | 1.21660608  | 4.34092524  | 1.106788787 |             |            |
| YOR306C     | YOR306C::MCH5::monocarboxylate permease homologue                                     |             |             |             | 1           |             |            |
| 0.978029404 | 0.930486726                                                                           | 1.008983518 | 0.93907015  | 1           | 0.974322796 |             |            |
| 0.932846163 | 1.031100669                                                                           | 0.985351025 | 1           | 0.790805065 | 0.778000395 |             |            |
| 0.885010938 | 1.100553341                                                                           | 1           | 0.767536811 | 0.618635863 | 0.832087218 |             |            |
| 0.702633801 | 1                                                                                     | 0.689361401 | 0.785970546 | 0.666378882 | 0.558698496 | 1           |            |
| 0.874783543 | 0.817121637                                                                           | 1.003806564 | 1.278440209 | 1.205083267 | 1           |             |            |
| 0.983311588 | 0.765414731                                                                           | 0.590433981 | 0.827581084 | 0.765563224 | 1           |             |            |
| 0.929851428 | 0.68908133                                                                            | 0.832456404 | 0.871324339 | 0.631162027 | 0.851982143 |             |            |
| YIL150C     | YIL150C::DNA43::Protein required for S-phase (DNA synthesis) initiation or completion |             |             |             |             |             |            |
|             |                                                                                       | 1.094614141 |             | 0.867681322 | 0.847787151 |             |            |
|             | 0.900673232                                                                           |             |             |             |             |             |            |
|             |                                                                                       |             | 1           | 0.704400137 | 0.792640796 |             |            |
| 0.772720547 | 0.805310187                                                                           | 0.724519329 | 1           | 0.912728715 | 0.742935734 |             |            |
| 0.719568429 | 1.100419993                                                                           | 0.926465274 | 1           | 0.679344455 | 0.921755375 |             |            |
| 0.975494384 | 0.689988014                                                                           | 0.745216827 | 0.525374421 |             |             |             |            |
| YOR308C     | YOR308C::SNU66::66kD U4/U6.U5 snRNP associated protein                                |             |             |             | 1           |             |            |
| 1.005960932 | 1.172825891                                                                           | 1.24233872  | 1.455089181 | 1           | 1.568659572 |             |            |
| 1.204161827 | 1.450952116                                                                           | 1           | 1.079940665 | 1.026833979 | 0.894329124 |             |            |
| 1.539438779 | 1                                                                                     | 0.5412228   |             | 0.685893194 | 1           | 0.571524743 |            |
| 0.964634769 | 0.473651937                                                                           | 0.438949565 | 1           | 0.789302154 | 0.792914804 |             |            |
| 0.740567106 | 0.701484946                                                                           | 0.804530335 | 1           | 1.150019963 | 1.543541195 |             |            |
| 1.026333985 | 1.898767745                                                                           | 1.493978791 | 1           | 1.009944224 | 1.186844084 |             |            |
| 1.514518016 | 0.887203739                                                                           | 0.950052073 |             |             |             |             |            |
| YIL152W     | YIL152W::YIL152W::molecular_function unknown                                          |             |             |             | 1           | 1.341060784 |            |
| 1.424277812 | 1.146831177                                                                           | 1.227063291 | 1           | 1.183292266 | 1.267569782 |             |            |
| 1.139487504 | 1.340937853                                                                           | 1           | 1.393004151 | 1.359350159 | 1.550203899 |             |            |
| 1.198708606 | 1                                                                                     | 1.287261655 | 0.987224301 | 0.926535562 | 0.98876375  |             |            |
| 0.629557323 | 0.935310442                                                                           | 0.656628906 | 1           | 0.99430291  | 1.000645725 |             |            |
| 0.72502609  | 0.738219391                                                                           | 0.865611811 | 1           | 0.898935582 | 1.026739306 |             |            |
| 0.921222981 | 1.041137157                                                                           | 1.25364069  | 1           | 0.957996087 | 1.09093299  |             |            |
| 1.050674298 | 1.181755525                                                                           | 1.236679848 | 1.018350701 |             |             |             |            |
| YMR287C     | YMR287C::MSU1::Protein essential for mitochondrial biogenesis                         |             |             |             |             | 1           |            |
| 1.222063621 | 1.230888806                                                                           | 1.933382238 | 1.351896219 | 1           | 1.469043425 |             |            |
| 1.600985579 | 1.303005902                                                                           | 1.234573523 | 1           | 1.484787403 | 1.692861211 |             |            |
| 1.241788758 | 1.465114061                                                                           | 1           | 1.125227234 | 1.36629311  | 1.014303473 |             |            |
| 1.128429639 | 1                                                                                     | 0.393706406 | 0.601162794 | 0.437006128 | 0.519012744 | 1           |            |
| 0.856320269 | 0.868418297                                                                           | 0.831777858 | 1.000291045 | 0.813083395 | 1           |             |            |
| 0.99916904  | 0.928673293                                                                           | 1.130785219 | 1.499381016 | 0.940230554 | 1           |             |            |
| 1.190759928 | 1.403790491                                                                           | 0.96984794  | 1.177826481 | 1.140441387 | 1.762631122 |             |            |
| YOR322C     | YOR322C::YOR322C::molecular_function unknown                                          |             |             |             |             | 1           | 0.91969468 |
| 0.804002299 | 1.09560867                                                                            | 0.805153335 | 1           | 1.133452209 | 1.185166388 |             |            |
| 0.888419409 | 0.794713811                                                                           | 1           | 1.004734877 | 0.890127988 | 0.708057805 |             |            |
| 0.931645589 | 1                                                                                     | 0.81726078  | 0.773552867 | 0.78296218  | 0.757593296 | 1           |            |
| 0.960813134 | 0.77991285                                                                            | 0.702830533 | 1           | 1.058334525 | 1.001703741 |             |            |
| 1.122344284 | 0.960502224                                                                           | 1.041396372 | 1           | 0.98795667  | 0.770784648 |             |            |

|         |                                                                                                                    |             |             |             |             |             |   |
|---------|--------------------------------------------------------------------------------------------------------------------|-------------|-------------|-------------|-------------|-------------|---|
|         | 0.561356444                                                                                                        | 0.743038667 | 0.610747604 | 1           | 0.849869662 | 0.74287086  |   |
|         | 0.76753366                                                                                                         | 0.842818591 | 0.526270356 | 0.701374823 |             |             |   |
| YIL154C | "YIL154C::IMP2'::Protein involved in nucleo-mitochondrial control of maltose, galactose and raffinose utilization" |             |             |             |             |             |   |
|         | 1.231805032                                                                                                        | 1.077005422 | 1           | 1.642158841 | 2.062517044 | 1.292148939 | 1 |
|         | 1.756982042                                                                                                        | 2.397415918 | 2.652188019 | 1.196533161 |             |             |   |
|         |                                                                                                                    |             | 0.931673831 | 1           | 0.909346248 | 1.167738448 |   |
|         | 1.329937431                                                                                                        | 1.12853351  | 1.073270031 | 1           | 1.237044651 | 1.126182078 |   |
|         | 1.408921852                                                                                                        | 2.194441379 | 1.148344805 | 1           | 0.995106706 | 0.734994427 |   |
|         | 1.349767612                                                                                                        | 0.488540792 | 1.853407367 |             |             |             |   |
| YMR289W | YMR289W::YMR289W::molecular_function unknown                                                                       |             |             |             |             |             |   |
|         | 0.930405923                                                                                                        | 0.997530836 | 1.168523982 | 1           | 1.067459189 | 1.009149499 |   |
|         | 1.107702582                                                                                                        | 1.136010679 | 1           | 0.82560487  | 0.839122104 | 1.021431876 | 1 |
|         | 1.283930959                                                                                                        | 1.4454356   | 1.305590052 | 1           | 1.260494841 |             |   |
|         | 1.042188857                                                                                                        | 0.88462122  | 1           | 0.909673019 | 0.745052145 | 0.855639089 |   |
|         | 0.872208879                                                                                                        | 1           | 1.135100878 | 1.013855057 | 0.974385041 | 1.077635875 |   |
|         | 1.344098398                                                                                                        | 1           | 0.996279931 | 1.063543781 | 1.152062919 | 1.358429889 |   |
|         | 1.31684621                                                                                                         | 1.112918128 |             |             |             |             |   |
| YOR324C | YOR324C::YOR324C::molecular_function unknown                                                                       |             |             |             |             |             |   |
|         | 1.013301514                                                                                                        | 0.973909825 | 0.864942345 | 1           | 0.939015091 | 1.016618214 |   |
|         | 1.094708876                                                                                                        | 1           | 0.847419797 | 0.884387066 | 0.932136246 | 0.984898827 | 1 |
|         | 0.991566281                                                                                                        | 0.748570744 | 1.02456639  | 0.922370696 | 1           | 0.77912229  |   |
|         | 0.913786909                                                                                                        | 0.60992777  | 0.73016159  | 1           | 0.901016005 | 0.807122069 |   |
|         | 0.812512298                                                                                                        | 1.104538924 | 0.858984384 | 1           | 0.742954957 | 0.840407049 |   |
|         | 0.685538056                                                                                                        | 0.909842457 | 1           | 0.724680992 | 0.77515592  | 0.923191971 |   |
|         | 1.105316359                                                                                                        | 0.692655348 | 0.806449707 |             |             |             |   |
| YIL156W | YIL156W::UBP7::Ubiquitin-specific protease                                                                         |             |             |             |             |             |   |
|         | 1.481831965                                                                                                        | 1.357404936 | 1.468411135 | 1           | 1.532121064 | 1.402516891 |   |
|         | 1.473981896                                                                                                        | 1.371275148 | 1           | 1.372243137 | 1.253797051 | 1.376840681 |   |
|         | 1.175872722                                                                                                        | 0.673838363 | 0.490873727 | 0.709022032 |             | 1           |   |
|         | 1.372692528                                                                                                        | 1           | 0.893614    | 0.858778122 | 0.703284153 |             |   |
|         | 0.706701209                                                                                                        | 0.807292399 | 1           | 0.851334441 | 0.827679725 | 0.760799145 |   |
|         | 0.839518037                                                                                                        | 0.751932971 | 1           | 1.214002514 | 1.147401283 | 1.002366204 |   |
|         | 1.298474385                                                                                                        | 1.130932051 | 1.085773768 |             |             |             |   |
| YMR291W | YMR291W::YMR291W::molecular_function unknown                                                                       |             |             |             |             |             |   |
|         | 1.263932352                                                                                                        | 1.030043555 | 0.762333624 | 1           | 1.022993992 | 1.068049983 |   |
|         | 1.037094452                                                                                                        | 0.625407125 | 1           | 1.16144966  | 2.077182789 | 2.306598521 |   |
|         | 1.169066446                                                                                                        | 1           | 2.42063902  | 1.870794425 | 2.956220245 | 1.497597478 | 1 |
|         | 1.274103749                                                                                                        | 1.320544406 | 1.243934841 | 0.631014475 | 1           | 1.23793502  |   |
|         | 1.271211862                                                                                                        | 1.38633591  | 1.272690227 | 1.066937105 | 1           | 0.998099949 |   |
|         | 0.774604753                                                                                                        | 1.909257003 | 1.107726312 | 1.300535103 | 1           | 1.240540198 |   |
|         | 0.960703112                                                                                                        | 1.041432612 | 0.997635874 | 2.01069597  | 1.051624402 |             |   |
| YOR326W | YOR326W::MYO2::class V myosin                                                                                      |             |             |             |             |             |   |
|         | 1.129892276                                                                                                        | 1           | 0.962249839 | 1.032197756 | 0.707752828 | 0.660770283 | 1 |
|         | 0.843756719                                                                                                        | 0.868023772 | 0.453782117 | 1.006169612 |             |             |   |
|         | 0.998440739                                                                                                        | 0.767416881 |             |             | 1           | 0.96899367  |   |
|         | 0.950516425                                                                                                        | 1.204556869 | 1.397109447 | 1.065507865 | 1           | 1.025972534 |   |
|         | 0.805803818                                                                                                        | 0.801971312 | 1.014519824 | 0.489804218 | 1           | 0.920816202 |   |
|         | 0.851794021                                                                                                        | 1.26382734  | 0.886574226 | 0.782150114 | 0.471085701 |             |   |
| YIL158W | YIL158W::YIL158W::molecular_function unknown                                                                       |             |             |             |             |             |   |
|         | 1.071054587                                                                                                        | 0.894655533 | 1.140589882 | 1           | 0.874604797 | 0.88239997  |   |
|         | 1.384917202                                                                                                        | 1.233532136 | 1           | 0.705591242 | 0.870289215 | 1.256758157 |   |
|         | 0.845681709                                                                                                        | 1           | 0.595658325 | 0.573243282 | 0.561775076 | 0.776528665 | 1 |
|         | 1.677700505                                                                                                        | 2.34542737  | 2.034087726 | 0.956558049 | 1           | 0.8947605   |   |
|         | 0.952957881                                                                                                        | 0.815428751 | 0.942508759 | 0.998081902 | 1           | 0.870949506 |   |
|         | 0.734484217                                                                                                        | 0.6820544   | 1.098122434 | 1.431803101 | 1           | 1.10836127  |   |
|         | 0.984559645                                                                                                        | 1.248709892 | 1.395846424 | 1.290802962 | 0.886131457 |             |   |



YMR306W YMR306W::FKS3::Protein with similarity to Gls1p and Gls2p  
(GB:Z49212) 1 1.433462802 1.542126983 1.560380249 1.535615417 1  
1.424365207 1.509243813 1.35175226 1.484228349 1 1.62336879  
1.438785335 1.167117001 1.541645332 1 1.506901405 1.896741153  
1 0.810401372 0.899556248 1 0.941535833 1.064770841  
1.151044517 1.113616056 0.914060257 1 1.202355483 1.068243279  
1.206521164 1.346481644 1.091677508 1 0.763434337 1.051598522  
1.041799545 0.818805804 0.816799164 0.881753341  
YOR328W YOR328W::PDR10::Putative ABC transporter highly similar to Pdr5p 1  
1.372691971 1.341130442 1.608873169 1.298217378 1 1.413717569  
1.470682795 1.276661785 1.232752721 1 1.406046111 1.506824915  
1.286087139 1.376501865 1 0.973092048 0.645577948 0.591262362  
0.819912923 1 0.858328346 0.639711397 0.530205258 0.762363639 1  
1.001418041 1.117261975 1.097938562 1.027851658 1.002237641 1  
1.023771254 1.03385047 1.021660281 1.0066556 0.939833545 1  
0.773669555 0.922650201 0.912043961 1.126974472 0.899067631 1.912362829  
YMR308C YMR308C::PSE1::Functions in nuclear transport of proteins 1  
1.207353364 0.846315299 1.388639328 0.809552581 1 1.345405987  
1.283015482 0.728253389 0.721796636 1 0.893562957 0.852515833  
0.341540711 0.977537672 1 0.856621721 0.552862205 0.424919054 1  
0.42110365 1 0.987541241 0.768760091 1.050732398  
1.209209233 0.845869566 1 0.825077217 0.460102063 0.520672959  
0.618929079 0.414941523 1 0.704078216 0.587460237 0.918428521  
0.7762216 0.724344828 0.651464271  
YOR330C YOR330C::MIP1::catalytic subunit of mitochondrial DNA polymerase 1  
0.966851313 0.962158353 1.262554558 1.095672199 1 1.114373732  
1.124511532 1.053592354 1.086231301 1 1.043773368 0.922024283  
0.842101733 1.242630435 1 1.114754564 1.046160618 0.643697822 1  
0.939190962 0.664584814 1 0.880129996 0.773237571  
0.819698349 1.12579697 0.833093945 1 0.843728005 0.684000992  
0.553470469 1.060476861 0.776154043 1 0.814056003 0.758712872  
1.003650714 0.890264236 0.913144012 2.997261037  
YMR310C YMR310C::YMR310C::molecular\_function unknown 1 0.919087872  
0.831392922 0.833669469 0.946168735 1 0.794038942 0.771541776  
0.975303933 1.101283827 1 0.594062979 0.520266621 0.62621933  
0.980825313 1 0.446381563 0.4462093 0.52244355 0.791060703 1  
0.552312273 0.559582521 0.482552184 0.629819649 1 0.911887728  
0.553045172 0.483384448 0.759593418 0.6063024 1 0.638069279  
0.750474514 0.550188854 0.952120142 1.121424399 1 0.52434192  
0.665826656 0.742982397 0.901829281 0.481778491 0.809076598  
YOR332W YOR332W::VMA4::vacuolar ATPase V1 domain subunit E (27 kDa) 1  
0.893397979 1.123060743 0.726879898 1.027621653 1 0.849495402  
1.170004109 1.016523847 1 0.828157712 0.994385309 1.325633323  
0.917666872 1 1.349034552 1.157136103 1.152918296 1.648238635 1  
1.36404778 1.442858591 1.620220022 1.172810114 1 0.910457955  
1.072311455 1.015137627 1.00525359 0.915855349 1 1.139845899  
1.376848421 0.881722805 1.045012414 0.959486618 1 1.434799521  
1.679052091 1.342934003 1.497285841 1.484017469 1.166331183  
YOR346W YOR346W::REV1::Protein required for mutagenesis by physical and  
chemical agents 1 1.151809913 1.115798235 1.121569422 1.195720332 1  
1.035959972 1.073744833 1.193930265 1.029960961 1 0.935388184  
1.126605752 1.817146729 0.877819901 0.542607432 0.516434868  
1 0.798400428 0.803594492 1 0.991384749 0.832428585  
0.676080482 0.496471296 0.85905032 1 1.091640575 1.30474466  
0.953781258 1.450224549 1.490338198 1 1.505825989 1.118830843  
1.104980271 1.227751287 1.147389243 3.182893232

YMR312W "YMR312W::ELP6::Elongator Protein 6; 30kD subunit. Homolog of ATPases, yet with substitutions of amino acids critical for ATP hydrolysis." 1  
1.033841018 0.825496477 0.742004398 0.878585218 1 0.837920037  
0.763011213 0.842671746 0.968702131 1 0.929068761 0.740238999  
0.868236476 1.005324863 1 0.413007999 0.791641698 1  
0.420809363 0.656202271 0.452802057 0.56276379 1 1.149889179  
0.968826681 0.864028231 0.883372032 1 0.901042649 0.764083255  
0.823470126 0.799180153 0.863391486 1 0.906222521 0.804355672  
0.858383303 0.970640804 1.173336189  
YMR314W YMR314W::PRE5::alpha-type of subunit of 20S proteasome 1  
1.098225996 1.339829546 1.124001328 1.618662962 1 1.092649634  
1.26765558 1.370322408 1.426709734 1 1.007042483 1.396307145  
1.812063829 1.226597522 1 0.902839996 0.959356539 1.013929952  
1.518174558 1 1.650403507 1.685671059 2.435135737 1.942920905 1  
1.217153906 1.563801343 1.278151986 0.833336201 0.945096562 1  
1.229993653 2.000330965 1.45848163 0.874894971 1.163067224 1  
1.346592295 1.612578297 1.138308004 1.105351467 1.055735781 1.654929347  
YMR316W "YMR316W::DIA1::may be involved in invasive growth, pseudohyphal growth"  
0.890220489 0.997604553 1.019749153 1.055328533  
0.858406142 0.954493977 1.136832814 1.120079485 0.912663459  
1.098967999 1.304119722 1.166954919 1 1.500156435 1.387685119  
2.009991651 1.952325418 1 1.463827167 1.802388768 1.630750078  
1.619257841 1 1.002173297 1.119112547 1  
0.853128226 0.755932791 1.000090481 0.516700418 1 0.923976626  
0.810940302 0.775535166 0.917628345 1.043743836  
YNL005C YNL005C::MRP7::Mitochondrial ribosomal protein MRP7 (YmL2) (E. coli L27) 1  
0.968759512 1.020781606 1.09676025 1.39644162 1 0.946267112  
1.109466254 1.482140771 1.179127025 1 1.097025129 0.976782984  
1.04744628 0.965372565 1 1.218773515 1.015255618 1.034168637  
1.09179327 1 1.331070757 1.1853685 1.217518361 1.072987807 1  
1.1203051 1.346794436 0.90187951 0.910493789 1.037396502 1  
1.117044742 1.450995198 0.909204425 0.672319181 1.237905829 1  
1.584337371 1.479641747 1.03638134 1.514528362 1.637333155 1.304679768  
YHR001WA YHR001WA::QCR10::8.5 kDa subunit of the ubiquinol-cytochrome c oxidoreductase complex 1  
1.609300637 2.244898141 1.259227452 2.604610276 1  
1.591100748 1.575218996 1.845627004 1.86787381 1 1.033963718  
1.338887005 2.458363577 1.055186727 1 1.765770972 0.940279922  
1.417225684 2.190140715 1 1.875743904 1.604577159 2.491008  
1.883109213 1 0.627336065 0.40969819 0.264399661 0.822844011  
0.829047294 1 0.419809667 0.179549085 0.407581564 1.616990116 1  
0.401039536 0.6686617 1.938135665 2.259401963 1.436023347  
YMR045C YMR045C 1 1.177628224 0.8694403 1.483348197 0.925012954 1  
1.190977367 1.267068735 1.033799557 0.909562455 1 1.416076984  
1.445333152 0.719358583 1.310034 1 1.52239337 2.075887399  
1.395119401 1.146911475 1 0.375608006 0.397416669 0.3030925  
0.909801913 1 0.860865391 0.980488882 1.503253856 1.403936404  
0.759927789 1 0.929937383 1.222310601 2.287643144 5.024297425  
1.83654445 1 0.918048847 1.485944596 1.584070125 1.096412546  
0.813738814 0.940420177  
YMR079W YMR079W::SEC14::Required for vesicle budding from the Golgi 1  
1.015146688 0.977732949 0.880738585 0.916024783 1 1.126365398  
1.044511513 0.937864926 0.895920432 1 0.893405832 0.803723892  
0.718121289 0.943270117 1 0.83537624 0.376902418 0.540722178  
0.899743776 1 0.779424373 0.441622433 0.476280603 0.516793106 1  
0.689312943 0.675902011 0.771554177 1.049300353 0.738852322 1  
0.961290786 0.603993903 0.624143418 1.051595994 0.690385655 1  
0.927501192 0.615585485 0.960748526 0.778009836 0.668895019 0.765295387

YIL160C YIL160C::POT1::peroxisomal 3-oxoacyl CoA thiolase 1  
1.137286999 1.330010818 1.221618736 1.072105874 1 1.214241464  
1.269944001 1.394233479 1.469577031 1 0.764320939 1.060786434  
2.448661692 1.289605736 0.418822189 1.314757135 0.994341163  
0.907756867 1 0.86287615 0.850188297  
1.003454898 1 0.639566714 0.594904945 0.664100396 0.857696559  
1.230636556 1 0.622407441 0.98286854 0.709963953 1.153994312  
0.714509171  
YIL174W YIL174W::YIL174W::molecular\_function unknown 0.989954773  
0.914470824 0.964959971 0.690173129 0.923785478 1.016003363  
1.085158628 0.919357272 1.11279831 1.151853799 1.02249525  
1.094509732 0.489606453  
1 1.119955144 1.381548931 1.358410692 1.231486473 1  
1.014592569 0.927114243 1.005207663 0.986516687 1.092754168  
0.947654174 0.887330052 0.802947204  
YIL176C YIL176C::YIL176C::molecular\_function unknown 1 1.03313511  
1.239061252 0.867321317 1.205054342 1 1.032630071 0.87731006  
1.159091062 1.183862883 1 1.081087431 1.056951428 1.683564328  
1.055008309 1 1.361270033 0.948871699 1.523026827 1.545830046 1  
1.396453071 2.221719314 1.561264456 1.219266163 1 0.976836412  
1.299025796 1.137688058 1.069216011 0.980685578 1 0.943093198  
1.496370225 1.352105362 1.295632086 1.522158737 1 0.927796294  
1.292655509 1.249325097 1.580832892 1.432473906 1.364222164  
YIR001C YIR001C::SGN1::contains one RNA recognition (RRM) domain 1  
0.727173304 0.973779252 1.029475784 1.207710741 1 0.920374032  
0.972469009 1.063406334 1.013183765 1 0.968836782 1.044314035  
0.998036442 1.098031073 1 1.219303215 1.224344958 0.975302305  
1.413821632 1 0.845630219 1.266262892 1  
1.203207571 0.8463144 0.795754677 0.868737467 1 1.185265957  
1.133938439 0.944556805 1.399379058 1.400771337 1 1.363092095  
1.191896265 1.368924493 0.979978066 1.459973782 1.133057482  
YOR348C YOR348C::PUT4::proline-specific permease (also capable of  
transporting alanine and glycine) 1 1.445805961 1.646649736 1.77609858  
1 1.729922606 1 1.136210237 2.158420357  
3.317157507 1.449030487 0.564013902 0.493334251  
0.369040941 0.722079051 0.425069397 1 1.153280903  
1.582461845 1 0.748085729 1.251527355 1.22571017 1  
0.798207687 3.832606121  
YIR003W YIR003W::YIR003W::molecular\_function unknown 0.876676359  
1.073905395 1.191943619 0.719542229 1.202252869 1.344419543  
0.927485984 0.973874453 1.022375924 1.36445489 1.050540821  
1.034791413 1 1.055687375 1.210321127 1.080230114 1.0069684 1  
1.054497718 2.101470896 1 0.951568641 1.045168017 1.208656124  
0.932845056 0.906579518 1 1.026783145 0.923213804 0.963443506  
1.039915648 0.727065048 1 0.846235907 0.884770663 0.871903336  
0.714321693 0.815680881 1.096281225  
YOR350C YOR350C::MNE1::similar to Lucilia illustris mitochondria cytochrome  
oxidase 1 1.220663947 1.13592757 1.229698593 1.154135255 1  
1.20323138 1.295797884 1.149867549 1 1.258368962 1.280466702  
1.157060898 1.278159408 1 1.362252224 1.506453741 1.257407264 1  
0.917083002 1 0.922673568 1.013279913 0.877798842  
0.954472905 0.943614098 1 1.245042913 1.16752946 1.109855302  
1.235651502 0.916596021 1 1.147451895 0.976551132 1.064724348  
0.874092803 1.409919247 2.713558756  
YIR005W YIR005W::IST3::U2 snRNP associated protein 1 1.216015518  
1.540813279 1.10427779 1.409297633 1 1.087333511 1.146008387  
1.742136255 1.356388239 1 1.431291424 1.679428523 1.900018349

|              |                                            |                          |             |             |             |   |
|--------------|--------------------------------------------|--------------------------|-------------|-------------|-------------|---|
| 1.271410667  | 1                                          | 1.105633893              | 1.211886331 | 0.984654547 | 1.602770081 | 1 |
| 1.384475539  | 2.194406313                                | 2.524404499              | 1.079168058 | 1           | 0.985313451 |   |
| 1.098058925  | 1.127415342                                | 1.121722324              | 1.321316298 | 1           | 0.870718343 |   |
| 0.981126405  | 0.94456927                                 | 1.550154227              | 1.157256533 | 1           | 1.154519054 |   |
| 0.969180637  | 1.409267333                                | 1.065555896              | 1.158925391 | 1.15144561  |             |   |
| YOR352W      | YOR352W::YOR352W::molecular_function       | unknown                  | 1           | 0.774625368 |             |   |
| 0.797090975  | 0.879054052                                | 0.924275493              | 1           | 1.196943459 | 0.969212147 |   |
| 1.161945166  | 0.923469894                                | 1                        | 0.846044948 | 1.029350917 | 1.105401789 |   |
| 0.908296967  | 1                                          | 1.085600245              | 0.804226592 | 1.39515713  | 1.398505559 | 1 |
| 1.045880239  | 3.084611558                                | 1.611085413              | 1.002489449 | 1           | 1.546190195 |   |
| 1.704304219  | 1.399300713                                | 1.044019101              | 1.315637538 | 1           | 1.387798006 |   |
| 1.505252444  | 1.468508516                                | 1.161567037              | 1.166966557 | 1           | 1.326772821 |   |
| 1.491036558  | 1.107434227                                | 1.28565779               | 1.683343673 | 1.489436402 |             |   |
| YIR007W      | YIR007W::YIR007W::molecular_function       | unknown                  | 1           | 0.929706529 |             |   |
| 1.134571828  | 1.054173935                                | 0.739189053              | 1           | 1.25446224  | 1.27858753  |   |
| 0.925417335  | 0.782223723                                | 1                        | 1.154355592 | 1.526307387 | 1.384795874 |   |
| 0.976365422  | 1                                          | 1.847072961              | 2.120069518 | 1.361463739 | 1           |   |
| 1.103579567  | 1.035931389                                | 0.961424514              | 1.522411695 | 1           | 0.941060605 |   |
| 1.103252034  | 0.947240149                                | 0.933143148              | 1           | 1.014006696 | 1.093829897 |   |
| 1.065053584  | 1.796776469                                | 1.109162403              | 1           | 1.094275661 | 0.967504563 |   |
| 1.393133666  | 0.914958889                                | 1.62510229               | 1.030609488 |             |             |   |
| YNL007C      | YNL007C::SIS1::HSP40 family                | chaperone                | 1           | 1.053945635 |             |   |
| 1.57104042   | 1.123345935                                | 0.796382247              | 1           | 1.089065184 | 1.322788214 |   |
| 1.270635393  | 0.8645093                                  | 1                        | 0.975649055 | 1.781543925 | 2.060085294 |   |
| 0.81511285   | 1                                          | 2.623395714              | 2.300905964 | 3.151848413 | 2.672737066 | 1 |
| 2.72113489   | 2.515184911                                | 3.038456838              | 2.401526207 | 1           | 1.31861362  |   |
| 1.522514117  | 1.208218588                                | 0.828887644              | 1.018441522 | 1           | 2.039335015 |   |
| 0.813686347  | 0.53593088                                 | 0.39364751               | 0.709846415 | 1           | 2.044775709 |   |
| 1.008203963  | 0.65250963                                 | 0.922027007              | 1.031405823 | 1.202231775 |             |   |
| YOR354C      | YOR354C::MSC6::Meiotic Sister-Chromatid    | recombination            | 1           |             |             |   |
| 0.835726883  | 0.833387736                                | 1.380184058              | 0.899677821 | 1           | 1.054487031 |   |
| 1.180954296  | 1.140730839                                | 0.875710393              | 1           | 0.842452841 | 0.861924641 |   |
| 0.618848449  | 0.873234537                                | 1                        | 1.185209583 | 1.670577369 | 0.882119283 |   |
| 0.890200345  | 1                                          | 0.844774736              | 0.715435077 | 0.399614697 | 0.787893542 | 1 |
| 1.204353588  | 1.1933656                                  | 1.186647139              | 0.939409323 | 1.013364522 | 1           |   |
| 1.220884316  | 0.907103242                                | 0.851954495              | 0.629043932 | 0.782288528 | 1           |   |
| 1.050416597  | 1.027311128                                | 0.906934797              | 1.035912812 | 1.44233433  | 2.103248805 |   |
| YIR021W      | YIR021W::MRS1::RNA splicing protein of the | mitochondrial carrier    |             |             |             |   |
| (MCF) family | 1                                          | 1.177757966              | 1.025402799 | 1.3133898   | 1.273516558 | 1 |
| 1.170445763  | 1.159896509                                | 1.206543597              | 1.33370061  | 1           | 1.002531118 |   |
| 0.913258319  | 1.216126885                                | 1.013839766              | 1           | 0.86063202  | 0.862792537 |   |
| 1.280864686  | 1                                          | 0.73894126               | 1.25302189  | 0.89338518  | 0.785928765 | 1 |
| 1.009566356  | 0.971117608                                | 0.825503284              | 0.884825922 | 0.921327384 | 1           |   |
| 0.85168779   | 1.040914194                                | 0.752511207              | 0.800939305 | 0.912869616 | 1           |   |
| 1.210762261  | 1.008527668                                | 1.086328775              | 1.154860715 | 1.258396659 | 0.84847964  |   |
| YNL009W      | YNL009W::IDP3::peroxisomal NADP-dependent  | isocitrate dehydrogenase |             |             |             |   |
| 1            | 0.933065818                                | 1.37861871               | 1.161266815 | 1           | 1.049518051 |   |
| 1.229581396  | 1.263560436                                | 1.363586204              | 1           | 1.02229357  | 1.24573204  |   |
| 1.156933032  | 1                                          | 1.00698344               | 1.333418182 | 1.105759728 |             |   |
| 0.622829376  | 0.784989763                                | 0.215252531              | 1           | 1.046613652 | 1.226684239 |   |
| 1.172171641  | 1.221356643                                | 1.178861388              | 1           | 1.240189206 | 1.2325408   |   |
| 1            | 1.151728665                                | 1.371823819              | 1.369359046 | 1.056878183 |             |   |
| YOR356W      | YOR356W::YOR356W::not yet annotated        | 1                        | 1.479531342 | 1.208892326 |             |   |
| 1.265669171  | 1                                          | 1.196537147              | 1.098212205 | 1.338397571 | 1.159217833 | 1 |
| 0.929649623  | 1.151346804                                | 1.165381833              | 1.162527027 | 1           |             |   |
| 0.919514222  | 0.606531039                                | 1                        | 0.758083848 |             |             |   |
| 0.61550828   | 0.656599615                                | 1.098328707              | 0.901010572 | 1           | 0.539326631 |   |

0.473528955 0.351611262 0.546135288 0.92768854 1 0.801891583  
 0.580186934 0.655194722 1.330014986 0.730788535 1.956143988  
 YIR023W YIR023W::DAL81::Positive regulator of multiple nitrogen catabolic  
 genes 1 0.979870934 0.998589793 1.246471281 0.925407624 1 1.084585884  
 1.180502625 1.008405975 0.954727194 1 1.109210575 1.116755815  
 1.05296712 1.065580252 1 1.350908219 1.528411682 1.313317175  
 0.909691364 1 0.838352981 1.402154891 0.871012673 1.182814028 1  
 0.697704973 0.706822533 0.637118899 0.640639054 0.980842389 1  
 1.224571921 1.009782978 1.290765541 1.228695309 0.847721185 1  
 0.784902281 0.836151722 1.078459403 1.038238035 0.873477912 0.859862762  
 YNL011C YNL011C::YNL011C::molecular\_function unknown 0.918540092  
 1.015825678 1.162871797 1.028896418 1.003693507 1.158792952  
 1.127557995 1.090342874 1.019964691 1.161373318 1.117149061  
 1.015211535 1 1.524015651 1.843019313 2.501284575 1.485177668 1  
 1.183780625 1.280330417 1.076724773 0.780019527 1 1.249741151  
 1.555865663 1.151474187 0.994712632 1.146504157 1 1.104236888  
 1.091876445 1.131638241 0.886200516 1.317811593 1 1.444808261  
 1.359119077 1.101938959 1.135600108 1.63198907 1.14881872  
 YOR370C YOR370C::MRS6::protein of the TCD/MRS6 family of GDP dissociation  
 inhibitors (Rab escort protein) 1 1.562312754 1.271176872  
 1.211399242 1 1.418473351 1.59418233 1.447919112 1  
 1.462360017 1.467771191 1 2.871553722 1  
 1 1.194204792 1.185821929 1.284933652 1.575901075  
 1.24444059 1 0.804645158 0.628628215 0.674534286 0.706950432  
 0.475742825 1 0.732305439 0.673242241 0.718994596 0.665561958  
 0.823643804  
 YIR025W YIR025W::MND2::needed for Meiotic Nuclear Division 1  
 1.324451961 1.419795522 1.419958445 1.535568618 1 1.297071923  
 1.388490467 1.423313437 1.562689505 1 1.396479549 1.518020736  
 1.62967628 1.5426961 1 1.335751613 1.239374811 1.729421598  
 1.413503715 1 1.108318944 1.44376682 0.929328034 1.159179234 1  
 0.749057707 0.996503465 0.797254797 0.771427631 0.876744611 1  
 0.984089799 1.14652374 0.959395523 1.217254226 0.970153383 1  
 1.112835259 1.195827225 1.154153828 0.925663243 1.369191296 1.200480549  
 YNL013C YNL013C::YNL013C::molecular\_function unknown 1 1.744603108  
 1.860426385 1.206926468 1.771608301 1 1.398445372 1.046581586  
 1.740505792 1.620386093 1 1.33818979 1.121696584 1.183152905  
 1.367185477 1 0.774816919 0.466879319 0.525079883 1  
 0.770627577 1.029567577 0.425238901 1 0.69888442 0.439303226  
 0.412847463 0.624295147 0.858486801 1 0.978067223 1.029904595  
 0.683916956 0.564476487 1.939221063 1 1.11999869 1.708592093  
 1.096271236 3.002872978 1.216931894 1.309933549  
 YOR372C YOR372C::NDD1::Nuclear Division Defective 1 1 0.867467596  
 0.816875796 0.912798166 0.878942774 1 0.890700273 0.922107364  
 0.723920377 0.716546435 1 0.84072583 0.777289296 0.541385469  
 0.955596139 1 1.216008819 1.233363637 0.881046464 0.953416571 1  
 0.701644264 0.604173563 0.515379108 0.581587313 1 0.811255424  
 0.699813644 0.6836949 0.77855572 0.896569249 1 0.758948323  
 0.556556427 0.644688848 0.807592612 0.707483334 1 0.812524994  
 0.769143065 1.289410968 1.164275654 1.352780862 1.474550829  
 YNL015W YNL015W::PBI2::Proteinase inhibitor that inhibits protease Prb1p  
 (yScB or I<sup>B</sup><sub>2</sub>) 1 1.18632468 2.018467617 1.587622436  
 3.600312771 1 1.151898436 1.670957257 3.151497356 3.336004888 1  
 1.155783997 1.775111641 4.760359213 2.784803013 1 1.868440851  
 1.998669578 1.976800103 3.191855458 1 2.302342033 4.71082763  
 7.996232526 4.834310021 1 0.955516959 1.090788507 0.915093117  
 0.527772879 1.159019677 1 1.377015737 2.483566784 2.432844105

3.16657969 3.724565644 1 1.390930924 2.039735266 1.605165771  
 2.068106961 4.668172322 1.670690585  
 YOR374W "YOR374W::ALD4::Glucose repressed. Utilizes NADP+ or NAD+ as a  
 coenzyme equally well. (sold by SIGMA under the catalogue number A5550,  
 according to A. Blomberg)." 1 0.929638087 1.216115371 1.117895356  
 0.478263602 1 1.729053028 1.918756465 0.819917268 0.863332897 1  
 1.450479693 1.459384885 2.517678009 0.759440148 1 6.182081836  
 5.778978082 7.507936059 4.392210003 1 2.881011492 1.495274619  
 2.651965508 3.246250154 1 1.286013199 1.446373513 1.967177295  
 0.818299692 0.822751244 1 1.089904445 0.774201432 1.842042358  
 0.98943177 0.559847942 1 1.169200854 0.721209064 1.556095401  
 0.850712309 2.183143806 1.027982598  
 YOR376W YOR376W::YOR376W::molecular\_function unknown  
 0.944833402  
 0.260600481 0.242052623 1 0.973681245  
 1.015854772 0.664529525  
 0.860437403 1 1.171263817 2.152025902  
  
 YNL029C YNL029C::KTR5::Putative mannosyltransferase of the KRE2 family 1  
 0.803700017 0.846700573 0.923587398 0.956711116 1 0.972311379  
 1.056776774 0.9234761 1 1.021272015 0.911490232 0.689912147  
 1.042890233 1 1.340117431 1.031716912 1 3.376376276  
 3.228849831 1.834170366 2.524218335 1 0.988872877 1.194787338  
 1.151474187 1.057590892 1.038669745 1.146570778 1.080719102  
 1.26228897 0.957886178 1.129263528 1 1.036174678 0.9477175  
 0.954291741 1.010393631 1.051984765  
 YML052W YML052W::SUR7::Multicopy suppressor of rvs167 mutation 1  
 1.173239315 0.986209025 0.866276888 0.973187131 1 0.921007523  
 0.945409407 0.869577787 1.031677917 1 0.934056141 0.841732849  
 0.866378112 0.686312813 1 1.206549375 0.723622814 0.893412432  
 0.396873167 1 1.068412836 0.893496101 0.951469046 0.303616713 1  
 0.854144408 0.610878004 0.616232323 1.102738046 0.65411546 1  
 0.689261137 0.486714604 0.541012368 0.572756314 0.736358514 1  
 0.821681368 0.57767389 0.788845337 0.935666301 1.144584679  
 YOR378W YOR378W::YOR378W::molecular\_function unknown 1 1.471537151  
 1.123845781 1.52993065 0.838075516 1 1.205072586 1.325999454  
 1.216111308 0.975188451 1 1.182482101 1.128340491 1.277883732 1  
 1  
 0.769303965 1.103313821 1.47895924 1.066673392 1 0.912798681  
 0.771738852 1.405615483 0.730252597 1 0.68289981 1.165859611  
 1.165891875 0.390434925 0.911562178  
 YNL031C YNL031C::HHT2::Histone H3 (HHT1 and HHT2 code for identical  
 proteins) 1 1.184327316 1.277704089 0.909484364 2.247278371 1  
 1.009799844 1.177030366 1.73119503 1.764461255 1 1.007106116  
 0.902666093 0.98821332 1.6077595 1 0.938777811 0.704338568  
 0.436778033 0.994955815 1 1.534335561 1.244582559 1.121784562  
 1.257917838 1 0.751087635 0.75933218 0.850143375 0.933578168  
 1.060807638 1 0.503407115 0.984467897 0.711780643 1.084718489  
 1.179741761 1 0.71398631 1.07017354 1.233986589 1.371283658  
 1.331005279 1.468421488  
 YMR316CA YMR316CA::YMR316C-A::molecular\_function unknown 0.759704059  
 0.754283575 1.107683313 1.128752703  
 0.734229921 1.330996742 1 1.236295883 1.814335226  
 1.631713202 1.970693958 1 1.419530241 1.945552387 1.424745073  
 1.215569821 1 1.038548578 1.062278544 0.803004616 1  
 0.748611279 0.931572512 0.824440331 0.910358988 1.293968229  
 0.747669599 0.750403731 0.894064174 1.027982598

YNL033W YNL033W::YNL033W::molecular\_function unknown 1 1.415533958  
 1.248224629 1.377155783 1 1.399962851 1.766082138 1.819777163  
 1.719880912 1 1.82770983 1.621791544 1.631416064 1.401962865 1  
 1.12715111 0.85483452 0.758373238 1 1.331131626 1.528813171  
 0.884805211 0.935629436 0.97235437 1.024809893 1  
 0.745584226 0.850982565 1.433658364 1 0.805821087  
 1.200907051 0.90276836  
 YNL035C YNL035C::YNL035C::molecular\_function unknown 1 0.855569344  
 0.887860598 0.91152267 0.871423984 1 0.927428273 1.000166407  
 0.834422307 0.832811356 1 0.942688768 0.801413825 0.696115375  
 0.868477737 1 0.798838822 0.510736114 0.569967036 0.896704114 1  
 1.11728672 0.849547406 1.239602677 0.975778177 0.997714676  
 0.948696125 1.179948442 1.073610364 1 0.857211571 0.861651967  
 1.022794358 0.763198279 1 1.010228314 0.974911965 0.723982931  
 0.65752725 0.880877781  
 YNL037C YNL037C::IDH1::alpha-4-beta-4 subunit of mitochondrial isocitrate  
 dehydrogenase 1 1 1.226009957 1.482198085 1.477177147 1.319656272 1  
 1.40695588 1.649916944 1.259333163 1.179153401 1 1.063311066  
 1.148927828 1.708171467 1.252621296 1 1.57307823 1.538689038  
 2.323513703 1.754751348 1 1.66420238 1.285083721 2.296499978  
 2.148289916 1 0.875703149 0.817548464 1.634668075 1.066165694  
 0.821742135 1 0.792994392 1.365652908 1.783158878 3.028291038  
 0.813051165 1 1.116228416 1.276556494 1.340605258 1.052943755  
 1.35447278 0.945673958  
 YIR027C YIR027C::DAL1::allantoinase 0.896376918  
 1.122557578 0.934364771 1.205797365 1  
 0.966303445 2.544380392 1.9718424 1 0.88287457 2.270656533  
 1.459779776 0.747402882 1 0.792101386 1.169417553  
 1.007776535 1 0.849285307 1 0.563556139  
 0.838847796  
 YIR029W YIR029W::DAL2::allantoicase 1 1.017739566 1.211596039  
 0.94614394 1 1.095698371 1.111903933 1.214643607 1  
 1.200568425 1.555563673 1.165811906 1 1.361993859  
 2.000719038 0.359727586 0.300462411 0.22503674 1  
 1.034292504 1.301038155 1.084934906 1.145047425 1.1147975 1  
 0.912130103 1.100189882 0.97614088 2.301850797 1 0.928821335  
 1.041444268 1.349307519 1.319588405  
 YIR031C YIR031C::DAL7::allantoin pathway 1 0.816432066  
 1.002080587 0.772592093 1 0.909223024 0.954984004 1.016892121 1  
 0.926130339 1.013611926 0.83513396 1.219710311 1 1.243556108  
 0.950602587 1.205068894 1.342916386 1 1.095857689 1.251899144  
 0.550458576 1.620977987 1 1.039770384 1.114172515 1.06159797  
 1.142896601 1.039856913 1 1.109801825 1.109184302 0.986112811  
 1.273878517 1.603597094 1 1.333581805 1.020942316 1.372983884  
 1.173746547 1.52551298 0.842350299  
 YGL112C YGL112C::TAF6::TATA-binding protein-associated-factor 1  
 1.093495422 1.158509464 1.395551963 0.961512893 1 1.239256346  
 1.093952186 1.170055316 1.174969571 1 1.066174492 1.040183476  
 0.853101407 1.029073145 0.857491253 0.934962333 1  
 0.891231215 0.456448124 1.243363886 1 0.935708746 0.953609253  
 0.935506969 0.991683404 1.061652577 1 0.976089298 0.888174274  
 0.727868913 0.785906281 0.711764733 1 1.153135103 0.987404959  
 1.055947869 1.109452898 0.924136082 1.030609488  
 YJL001W "YJL001W::PRE3::Responsible for the postacidic activity of the yeast  
 20S proteasome, and necessary for hydrolysis of peptidylglutamyl-peptide." 1  
 1.1011584 1.345715516 1.286754217 1.502558673 1 1.120165214  
 1.162240179 1.711593654 1.492413391 1 1.087928367 1.619163099

2.035211305 1.286994701 1 1.488643894 1.302880692 1.685629908  
 2.340505055 1 1.746285609 1.622435958 2.277408981 1.700563651 1  
 1.359438429 1.823917572 1.916505147 1.024627865 1.049449411 1  
 1.093874418 2.672621424 1.541991098 0.939353269 1.191204497 1  
 1.332315217 2.081008481 1.379698099 1.333133376 1.258735885 1.628660653  
 YGL114W YGL114W::YGL114W::molecular\_function unknown 1 0.995589948  
 0.786187157 0.894457832 0.609940916 1 1.053146416 0.989544996  
 0.77292552 0.722784356 1 2.662359413 1.637470781 0.781513643  
 0.78398437 1 1.525862007 1.034005646 1.188023277 0.524439592 1  
 2.288564001 1.393539877 1.358512331 1.070879389 1 1.549035376  
 1.512507199 1.249647535 1.138406551 0.972272402 1 1.48747719  
 1.017033977 1.376449185 1.301373446 0.382781619 1 1.252446727  
 0.88019228 0.908050532 0.51159678 0.525002379 0.738151027  
 YJL003W YJL003W::COX16::Cytochrome oxidase assembly 1 1.410862515  
 1.133896811 2.000011399 1 1.165049488 1.154505986 2.079216012  
 1.623334924 1 1.176209314 1.415540677 1.826844611 1.400036615 1  
 1.338953397 1.09186975 1.611999741 2.021197801 1 1.754110622  
 3.493144282 2.194279509 1.418808241 1 0.964953231 1.112054829  
 0.780788861 0.800764063 0.990401752 1 0.882312398 1.594392617  
 1.258500677 1.192686231 2.015626298 1 1.32781077 1.812805399  
 1.273772036 2.011927262 1.89279246 1.859825439  
 YGL128C YGL128C::CWC23::Complexed with Cef1p 1 1.230601092  
 1.300781218 1.185251784 1.303152933 1 1.201323008 1.181726529  
 1.450360142 1.265139559 1 1.297114591 1.346960784 1.584184844  
 0.953029509 0.553776047  
 1 0.599246171 0.549505423 0.661154706 0.662756956 0.959265959 1  
 1.099018301 0.699059442 1 1.399689494  
 1.169557446 0.619941796  
 YJL005W "YJL005W::CYR1::Required for START A of cell cycle, and glucose and  
 nitrogen repression of sporulation" 1 1.415302714 1.461062632 1.592409274  
 1.481337698 1 1.616493867 1.6080887 1.478263836 1.294898561 1  
 1.435769491 1.706005474 1.694701725 1.526440056 1 1.798284853  
 2.025396975 1.314418119  
 0.827999943  
 0.791402472 -183.88104  
 YJL005W "YJL005W::CYR1::Required for START A of cell cycle, and glucose and  
 nitrogen repression of sporulation"  
 1 1.080658248 1.086607328 1.389516703  
 1.383005418 1.134322623 1 0.992393156 1.227982836 1.012374191  
 1.16779862 0.944976123 1 1.090395185 1.065733427 1.087273659  
 1.074651224 0.828531695 1.006092019  
 YGL130W "YGL130W::CEG1::mRNA guanylyltransferase (mRNA capping enzyme),  
 alpha subunit" 1 0.808642276 1.009941294 0.999711734 1  
 0.920169148 1.009900462 1.11862457 1.12911336 1 0.874795237  
 1.003171799 0.882832718 1.106755105 1 0.818152843 0.459345659  
 0.739075896 0.584126239 1 0.761595798 0.828178731 0.846199354 1  
 1.010656889 1.017366711 1.177131146 1.106870798 1.112810047 1  
 1.091959808 0.857280074 0.986112811 0.956039765 0.71685387 1  
 0.923173545 0.876730537 0.834608216 0.715123104 0.649451145 0.621693021  
 YJL007C YJL007C::YJL007C::molecular\_function unknown 1 1.180391276  
 1.320927471 1.123750428 1 1.13853169 1.087811304  
 1.097137831 1 1.173442435 1.230727773 1.134515567 1.147480607 1  
 0.830002314 1.21108853 0.500591818 0.580355654 1  
 1.232412517 1.187877715 1.515459996 1.270012598 1.146642868 1  
 1.077959636 1.306699393 0.97947234 0.98710514 1.045238668 1  
 0.831864863 1.024905087 0.794741605 0.949223229 0.536879351 1.339704695



YNL039W YNL039W::BDP1::RNA polymerase III Transcription factor TFIIIB (90 kDa subunit; also called TFIIIB90 or B'' or B''90 component) 1  
0.666988233 1.033443516 0.943317901 0.844326553 1 0.886687326  
0.909567205 0.943255761 0.947966348 1 0.709323804 0.91830247  
0.864415524 0.932463184 1 1.007273268 1.115255259 1.02619119 1  
1.22153975 1.312424675 1.054942089 0.898886139 1 0.72425831  
0.850869834 0.711671825 0.974023506 1 1.067653164 0.961899667  
0.995676409 1.130490269 1.227541013 1 1.013637676 1.00174471  
1.150996667 0.939261105 1.085052556 1.127803701

YGL132W YGL132W::YGL132W::molecular\_function unknown 1  
1.254615951 1.316891159 1.098930402 1 1.223922568 1.222195952  
1.21750651 1.316371449 1 1.316391018 1.237935456 0.956223079  
1.241876793 1 0.80380933 0.775048775 0.723883935  
0.633306882 0.783871491 0.393751136 0.457683418 1 1.159178631  
1.230651781 1.25336786 0.93516004 1 1.196205803 1.143060824  
1.197678819 0.951203641 1.025854691 1 0.806212537 1.099218533  
0.880103707 0.847521672 0.970212948 1.291545421

YJL009W YJL009W::YJL009W::molecular\_function unknown 1 1.175313379  
1.318027562 0.995027395 1.605841301 1 0.956167655 0.839595508  
1.518368353 1.520390588 1 0.860443933 1.057903055 1.635391387  
1.05362214 1 0.968883903 0.786578989 1.007584208 1.180869715 1  
1.382077859 2.554203803 1.999926396 1.042077628 1 0.725183438  
0.958582808 0.653885911 0.596594148 0.735987431 1 0.964714742  
1.634801767 0.795397006 0.629855324 1.178392509 1 1.380801141  
1.969784859 1.269752714 1.776292006 1.19560635 1.949139086

YNL053W YNL053W::MSG5::Tyrosine protein phosphatase involved in adaptation response to pheromone 1 0.890850775 0.760153025 0.896331317 0.869728462 1  
1.099507643 0.876154938 0.803918445 0.906225924 1 0.729602773  
0.680148001 0.666603933 0.949305549 1 0.61333122 0.680584389  
0.61666201 1 0.99683532 1.065168054 0.979966902 1.2400925 1  
0.919756991 0.824462462 0.956887959 1.080949123 1.02031154 1  
0.566489245 0.566341656 0.72503794 0.730610662 0.845210327 1  
0.684762922 0.827285763 0.610139578 1.033477311 1.01222136

YGL134W YGL134W::PCL10::PHO85 cyclin 1 0.834823608 1.026036406  
1.008433337 0.990257385 1 0.864030677 0.998637849 1.106590758  
1.208026285 1 0.831750839 1.010957044 0.890534655 1.084206405 1  
1.292509714 0.974426376 1.141908362 1.009422059 1 1.649403467  
2.245446124 1.08603209 1 1.112651321 1.124933032 1.150823398  
1.111923217 1 1.161221151 1.428730897 1.022542435 0.996495621  
1.211247741 1 1.172493487 1.212948678 1.053565236 1.246441827  
1.286643122 0.921156488

YJL011C YJL011C::RPC17::Sspecific subunit of Pol III which participates together with C34 in the recruitment of Pol III by the preinitiation complex. 1  
0.992325914 1.21766512 1.005702785 1.740566257 1 0.869987844  
0.77574513 1.615610747 1.519950087 1 0.777319928 0.862852899  
0.917334422 1.167227036 1 0.290719655 0.355233068 0.393815595  
0.955136917 1 0.587438591 0.973879351 1.152148277 0.799115503 1  
0.761093378 0.819131448 0.675627491 0.770126727 1 0.861884702  
1.635599216 1.268607334 2.103210991 1 0.871043259 1.125120048  
1.043808819 1.517207337 0.895638291 1.126928036

YNL055C "YNL055C::POR1::Outer mitochondrial membrane porin (voltage-dependent anion channel, or VDAC)" 1 0.913498576 0.718657987 0.86469285  
0.683578785 1 0.783058909 0.892550357 0.744774551 0.923565963 1  
0.982859166 1.038607966 1.621735494 0.933958627 1 1.420764011  
1.435926438 1.871865243 1.616261626 1 0.8891052 0.476495171  
0.700850494 1.180996409 1 1.336025639 1.078391959 1.909116579  
1.514000134 0.923614859 1 0.931842015 1.033643186 1.30421378

|                                                  |                                                                      |             |             |             |             |             |
|--------------------------------------------------|----------------------------------------------------------------------|-------------|-------------|-------------|-------------|-------------|
|                                                  | 0.861229722                                                          | 0.79514049  | 1           | 0.984727339 | 0.906868411 | 1.001961874 |
|                                                  | 0.617007924                                                          | 1.110382393 | 0.90539525  |             |             |             |
| YGL136C                                          | YGL136C::MRM2::Mitochondrial rRNA Methyltransferase; methylates the  |             |             |             |             |             |
| 21S (mitochondrial)                              | rRNA at position U2791                                               |             | 1           | 0.894634883 | 1.082133263 |             |
|                                                  | 0.815704188                                                          | 1.214188854 | 1           | 0.832401455 | 0.830248213 | 1.191742816 |
|                                                  | 1.272945372                                                          | 1           | 0.793575528 | 0.894542467 | 1.657041773 | 0.889148606 |
|                                                  | 0.766490474                                                          | 0.612281282 | 0.805317395 | 1.268433041 | 1           | 1.316148454 |
|                                                  | 2.055403147                                                          | 1.848019079 | 1.485461057 | 1           | 1.011183401 | 1.002519377 |
|                                                  | 1.028561951                                                          | 0.819045697 | 0.957364614 | 1           | 1.01923586  | 1.480846083 |
|                                                  | 0.959699115                                                          | 0.965956972 | 1.470584381 | 1           | 0.633241511 | 0.990281114 |
|                                                  | 0.813897278                                                          | 1.172714559 | 0.725522986 | 1.334451019 |             |             |
| YJL025W                                          | YJL025W::RRN7::involved in the transcription of 35S rRNA genes by    |             |             |             |             |             |
| RNA polymerase I                                 | 1                                                                    | 0.792955605 | 1.103385414 | 0.88606027  | 1           |             |
|                                                  | 0.883693826                                                          | 0.914369889 | 1.021212628 | 0.979710462 | 1           | 0.646846805 |
|                                                  | 0.690394844                                                          | 0.639690237 | 0.949179223 | 1           | 0.51307788  | 1.197174826 |
|                                                  | 1.239334173                                                          | 0.751760733 | 1           | 0.378522169 | 0.97285543  | 0.425053516 |
|                                                  | 0.504689549                                                          | 1           | 0.758336089 | 0.695604252 | 0.77188226  | 0.977971357 |
|                                                  | 0.927945833                                                          | 1           | 0.578519665 | 0.701463293 | 0.392545687 | 0.93270555  |
|                                                  | 0.770478528                                                          | 0.735170589 | 0.801762093 | 1.225161875 | 1.267104821 |             |
|                                                  | 1.091027549                                                          |             |             |             |             |             |
| YNL057W                                          | YNL057W::YNL057W::molecular_function unknown                         |             |             |             |             |             |
|                                                  | 1                                                                    | 0.99500015  |             |             |             |             |
|                                                  | 0.905560791                                                          | 0.798887048 | 1           | 0.922536217 | 0.80468115  |             |
|                                                  | 0.832530991                                                          | 1           | 1.112079984 | 1.078673846 | 1.014006635 | 0.837826819 |
|                                                  | 0.706520876                                                          | 0.841002344 | 0.911529144 | 0.651289586 | 1           | 0.63762529  |
|                                                  | 0.702032666                                                          | 0.691474637 | 0.715173448 | 1           | 1.051919829 | 1.18227408  |
|                                                  | 1.026699819                                                          | 1.050088374 | 0.883671234 | 1           | 1.24929588  | 0.842159301 |
|                                                  | 0.628750479                                                          | 0.873209578 | 1.504186885 | 1           | 1.043850496 | 0.867567371 |
|                                                  | 1.049203121                                                          | 0.567669053 | 1.194314384 | 0.923783274 |             |             |
| YGL138C                                          | YGL138C::YGL138C::molecular_function unknown                         |             |             |             |             |             |
|                                                  |                                                                      | 0.057044182 |             | 1           | 1.276346422 |             |
|                                                  | 0.892837734                                                          | 0.737538174 | 1           | 0.956707141 | 1.272776204 |             |
|                                                  | 0.690835244                                                          | 0.875117916 | 1           | 1.006256567 | 1.764761198 | 1.558202622 |
| YNL059C                                          | YNL059C::ARP5::Actin-related protein. Part of the carboxypeptidase Y |             |             |             |             |             |
| pathway.                                         | 1                                                                    | 0.632101083 | 0.734890222 | 0.914020287 | 0.752740876 | 1           |
|                                                  | 0.918089809                                                          | 0.888702536 | 0.671776838 | 1           | 0.891369917 | 0.886278778 |
|                                                  | 0.577749301                                                          | 0.926469201 | 1           | 0.891990796 | 0.978590896 | 0.652271479 |
|                                                  | 0.712705374                                                          | 1           | 1.2945043   | 0.773556374 | 1.065824653 | 0.810890224 |
|                                                  | 0.844628628                                                          | 1.007908964 | 0.889936753 | 0.748451142 | 0.891136302 | 1           |
|                                                  | 1.100873789                                                          | 0.943010418 | 1.02148906  | 1.150020901 | 0.844522641 | 1           |
|                                                  | 1.321670092                                                          | 1.075052247 | 1.23523174  | 0.593015095 | 1.180688868 | 0.815205939 |
| YGL152C                                          | YGL152C::YGL152C::molecular_function unknown                         |             |             |             |             |             |
|                                                  | 1                                                                    | 0.782496289 |             |             |             |             |
|                                                  | 1.057093733                                                          | 0.916228199 | 1.446701307 | 1           | 0.847164435 | 0.902423731 |
|                                                  | 1.349569697                                                          | 1.369885576 | 1           | 0.972172034 | 1.111877064 | 1.532323492 |
|                                                  | 1.07705811                                                           | 1           | 1.753769786 | 0.925345088 | 1.139724944 | 1.16983428  |
|                                                  | 2.588776479                                                          | 3.154299749 | 2.868744207 | 1.656419432 | 1           | 1.116289821 |
|                                                  | 1.689596235                                                          | 1.038536362 | 0.726224305 | 0.958809544 | 1           | 1.296701061 |
|                                                  | 1.794935249                                                          | 1.360444611 | 1.335253729 | 1.857520929 | 1           | 1.258109942 |
|                                                  | 1.917090701                                                          | 1.597642767 | 1.804301681 | 1.377000709 | 1.17421175  |             |
| YNL061W                                          | YNL061W::NOP2::May participate in nucleolar function during the      |             |             |             |             |             |
| transition from stationary phase to rapid growth | 1                                                                    | 0.779018028 |             |             |             |             |
|                                                  | 0.710837852                                                          | 0.709627783 | 0.692963298 | 1           | 0.707451971 | 0.662625213 |
|                                                  | 0.814914036                                                          | 0.759619541 | 1           | 0.531901734 | 0.362945676 | 0.313148228 |
|                                                  | 0.790237498                                                          | 1           | 0.417966762 | 0.254425623 | 0.313501984 | 0.459275486 |
|                                                  | 0.606161014                                                          | 0.336899069 | 0.239740209 | 0.43309773  | 1           | 0.796314428 |
|                                                  | 0.590754534                                                          | 0.692800178 | 0.845976372 | 0.786833142 | 1           | 0.793176132 |

0.592660457 0.376982014 0.887377362 0.877196652 1 0.787427648  
 0.760942307 0.898475366 0.958608653 0.573984971 0.808200933  
 YGL154C YGL154C::LYS5::Responsible for the posttranslational conversion of  
 the alpha-aminoadipate semialdehyde reductase Lys2 from the inactive apo-form  
 into the catalytically active holo-form. 1 1.72233404 1.824730286  
 1.357568109 2.293476453 1 1.457551875 1.442511912 2.10036043  
 1.663239799 1 1.542130607 1.622432779 2.060234694 1.563613721  
 0.652431893 0.480929979 1 2.113720567 2.996659611  
 1 1.110562951 1.230624569 1.179779919 1.029827594 0.99531354 1  
 1.187155165 1.403555138 1.249622792 0.960630098 1.61613838 1  
 1.006074796 1.235692241 0.874042149 1.317383693 0.817450608 1.471048274  
 YNL063W YNL063W::YNL063W::molecular\_function unknown 1 1.11952162  
 1.064631513 1.012912925 1.11808761 1 0.920055422 1.003576067  
 1.383349581 1.401294754 1 0.861104419 0.93459984 1.141920493  
 1.251192848 1 0.715067439 0.591154618 0.843429234 1.162303772 1  
 1.068806597 1.041740193 1.343729528 1 0.917587986 0.733904337  
 0.887761832 0.856763695 0.889223322 1 1.153372087 0.886083013  
 0.81663998 1.124725537 1 1.159142721 0.923704309 0.948078713  
 0.954995486 1.000634428 1.035863164  
 YNL077W YNL077W::YNL077W::molecular\_function unknown 1 1.485810171  
 1.399973304 1.159686941 1.282315358 1 1.247154547 1.497771259  
 1.342832894 1 1.064733602 1.207610934 1.086488943 1.131559257  
 0.764117817 0.532240705 1 1  
 0.889621614 0.735289896 0.865846446 0.95612304 0.944498497 1  
 0.869624771 0.925956233 0.500415455 1.111348119 1.043059432 1  
 0.801522401 0.817570617 0.831218997 0.929289502 1.152321171  
 YNL079C YNL079C::TPM1::tropomyosin I 1 1.112825756 1.210797772  
 1.146098319 1.359418965 1 1.065532751 1.036120359 1.454112782  
 1.558933355 1 0.914915524 1.105061448 1.459504221 1.391691647 1  
 1.007684544 0.828035942 0.887253384 1.036556764 1 1.4354221  
 1.2647863 1.568229961 1.441907845 1 1.079032853 1.142219347  
 1.168353548 0.997665213 0.986663615 1 1.261407039 1.780190857  
 1.464061628 1.486606561 1.877655765 1 1.081328707 1.349903896  
 1.20812732 1.273136794 1.394962103 1.372978396  
 YNL081C YNL081C::YNL081C::molecular\_function unknown\* 1 0.876877052  
 1.323567193 1.043481529 1.731300806 1 0.977627875 1.105004734  
 1.306660441 0.934872564 1 0.981492609 1.001088921 1.49735834  
 1.098931959 1 1.077571176 0.898454735 0.663079888 1.070518103 1  
 2.181668733 2.839241109 1.57350181 1 1.021112156 1.061886377  
 0.711275097 0.624739867 0.946254619 1 1.534504411 2.062057658  
 1.412657245 1.209157159 2.24112455 1 1.479706054 1.56873393  
 1.025441961 1.854202192 2.03608058 1.540222567  
 YJL027C YJL027C::YJL027C::molecular\_function unknown 1 1.739354095  
 1.815512031 1 1.534843477 1.579054259 1.801077232  
 1.603741276 1 1.467733987 1.459599483 1  
 2.026361912 0.320145932 1  
 0.862419347 1 1.132765853 1.648360665 1  
 0.461603626 1.179755567  
 YJL029C YJL029C::VPS53::Required for Vacuolar Protein Sorting 1  
 0.743398127 0.747034786 0.943299302 0.650964028 1 0.881133866  
 0.891675704 0.79996593 0.715721599 1 0.792830316 0.897497507  
 0.598746996 1.019198879 1 1.451319255 0.824332298 1.504821716  
 1.185608068 1 0.782934389 0.837272727 0.792451837 0.759196494 1  
 0.767307143 0.799647454 0.848339305 0.723568598 0.715533071 1  
 1.108549302 0.767423836 0.766116795 1.088512503 0.661714367 1  
 1.011333486 0.885936412 1.164371768 0.782574563 1.129449666 1.009594469

YJL031C YJL031C::BET4::catalyzes prenylation of Ypt1p (as a subunit of PGGTase-II) 1 0.809932157 1.339823268 1.038890178 1.245508439 1 0.848858354 1.101918806 1.450087018 1.217590352 1 0.905761144 1.448191524 1.606623302 1.121650076 1 1.673635232 1.439697417 1.52656041 2.157694131 1 1.545102242 2.211680285 2.679013172 1.350601499 1 1.071753028 1.348592048 0.975900925 0.803053806 1.095056973 1 1.158996565 1.738333164 0.934560029 0.883669376 1.286885116 1 1.653233256 1.73007679 1.297955487 1.288992808 1.649849277 1.446530805

YGL156W YGL156W::AMS1::vacuolar alpha mannosidase 1 1.302329994 1.327715878 2.365321933 1.141352424 1 1.754567427 2.036846114 1.440290574 1 1.304176444 2.233858406 1.926218317 1.929748623 1.740438924 3.920838665 2.00333696 1.236393786 1 1.029564441 1.283335057 1.214592499 1.259348966 1 0.850493235 1.226223142 3.20915398 4.295629424 1.692560289 1 0.967047451 1.414787366 1.771777146 0.733061494 2.481730214 1.126052476

YJL033W YJL033W::HCA4::putative RNA helicase 1 0.615268128 0.4808448 0.763071945 0.558612014 1 0.579896862 0.496127608 0.774843092 0.782705927 1 0.309116559 0.211183611 0.17403057 0.809096062 1 0.200952333 0.2280185 0.333889768 1 0.322322063 0.400579543 0.111812911 0.521458906 1 0.662807976 0.415823488 0.645999097 0.866698625 0.806521051 1 0.715017371 0.565932752 0.333526332 0.915983347 1.189524271 1 0.485490374 0.505121269 1.05962708 1.172927915 0.423544642 0.859862762

YGL158W YGL158W::RCK1::Serine/threonine protein kinase 1.080129059 0.852344457 1.040109335 0.726996078 0.819164737 0.723392879 1 0.667149122 0.773343202 0.867790814 1 0.926980407 1 0.774858536 1.213858941 0.952678964

YJL035C YJL035C::TAD2::tRNA-specific adenosine-34 deaminase subunit Tad2p 1 0.99360511 0.971522177 1.361385865 1 1.007797381 0.950707272 1.283369314 1 0.703688312 0.927201901 1.375734182 1.037834411 1 1.216896569 2.256010388 1.506266286 1 1.563032709 0.986355773 0.730048529 1 0.99987386 0.840868706 0.699209012 0.828446181 0.992924864 1 0.987526278 1.110096795 0.875485019 0.720348933 1.46375082 1 1.100832466 1.085837333 0.932827613 1.549695345 1.116911529 1.360719714

YGL160W YGL160W::YGL160W::molecular\_function unknown 1 1.402940896 0.995852369 1.438935259 1.114169431 1 1.427836786 1.04623811 0.960578089 1 1.318635032 1.271437279 1.602956682 1.41829516 1 1.55271097 1.433387316 1.312151484 1 0.992009457 0.779236794 1.241224176 1.337053578 1 0.926572285 1.061939638 0.972031793 1.102569636 0.838595991 1 0.811946827 0.64562081 0.749660737 0.716529974 0.667521064 1 1.058946017 0.871022344 1.036801145 0.89946761 1.484254957 0.80995221

YJL050W YJL050W::MTR4::Dead-box family helicase required for mRNA export from nucleus 1 0.814647035 0.608600156 0.979429898 0.680871538 1 0.856289192 0.789741521 0.768545384 0.707552542 1 0.653475123 0.400726688 0.370012989 0.953645709 1 0.611425277 0.364956534 0.674052689 1 0.802079537 0.503348106 0.626248084 1.062692935 0.859171227 1 0.901598814 0.441205962 0.290767428 0.726068211 0.620773125 1 0.6617661 0.464242527 0.731727275 0.896590363 0.379248176 0.826589061

YGL162W YGL162W::SUT1::Involved in sterol uptake 1 1.768881114 1.421882569 1.111422344 1.239834518 1 0.994354429 1.14517168 0.972928221 0.920907723 1 1.537692515 1.143367367 1.122671662

|         |                                                                                    |             |             |             |             |             |
|---------|------------------------------------------------------------------------------------|-------------|-------------|-------------|-------------|-------------|
|         | 1.425212633                                                                        | 0.489556637 | 0.77142461  |             |             |             |
|         | 1                                                                                  | 0.970779946 | 0.426743031 | 0.690950284 | 1           |             |
|         | 1.442828779                                                                        | 1.282870388 | 1.228448446 | 1.752099881 | 1           | 0.798030731 |
|         | 0.857393492                                                                        | 0.871828866 | 0.787103369 | 1.224998019 |             |             |
| YJL052W | YJL052W::TDH1::Glyceraldehyde-3-phosphate dehydrogenase                            | 1           | 1           |             |             |             |
|         | 1.493191456                                                                        | 1.126686725 | 1.038506293 | 1.043898963 | 1           | 1.550762982 |
|         | 1.304294991                                                                        | 1.05839029  | 1.153903712 | 1           | 1.623349388 | 2.043513369 |
|         | 2.871124377                                                                        | 1.476313324 | 1           | 1.89338221  | 2.311347285 | 3.662915042 |
|         | 1.808867047                                                                        | 1           | 1.159288539 | 0.871012711 | 1.120595595 | 0.93926193  |
|         | 1.246762499                                                                        | 1.038646444 | 2.458352419 | 1.517040193 | 1.173377692 | 1           |
|         | 1.133173546                                                                        | 1.9924391   | 1.989027034 | 1.775900003 | 0.830781529 | 1           |
|         | 1.348981937                                                                        | 1.495659553 | 1.931923382 | 1.0795514   | 1.552522219 | 1.082271213 |
| YNL083W | YNL083W::YNL083W::molecular_function unknown                                       | 1           | 1           | 1.300859262 |             |             |
|         | 1.112779856                                                                        | 1.361724844 | 1.347626669 | 1           | 1.38310807  | 1.429119055 |
|         | 1.186515013                                                                        | 1           | 1.190615541 | 1.11885819  | 1.081030295 | 1.32217872  |
|         | 1.087084116                                                                        | 0.966929386 | 0.962945064 | 1           | 1.046554616 | 0.993636777 |
|         | 0.73867652                                                                         | 1.290170348 | 1           | 0.94816859  | 0.867119837 | 1.04770035  |
|         | 1.104912616                                                                        | 1           | 0.818047057 | 0.622158722 | 0.652071301 | 1           |
|         | 1.228011771                                                                        | 1.018357905 | 0.949657543 | 1.035626114 | 1.090281049 | 0.847604027 |
| YGL176C | YGL176C::YGL176C::molecular_function unknown                                       | 1           | 1           | 1.35280289  |             |             |
|         | 1.441150532                                                                        | 1.4993572   | 1.021156474 | 1           | 1.334729394 | 1.1593323   |
|         | 1.228455388                                                                        | 1           | 1.209709597 | 1.020690661 | 1.82529212  | 1.735223934 |
|         | 0.727330491                                                                        | 0.856777359 | 0.956250834 | 1           | 1.041503192 |             |
|         | 1.757209906                                                                        | 1.499404776 | 1           | 0.863535632 | 0.783474519 | 0.822349639 |
|         | 0.9725679                                                                          | 1.122575332 | 1           | 0.931665897 | 0.64085872  | 0.866861914 |
|         | 0.840575088                                                                        | 0.810784811 | 1           | 0.781146776 | 0.73519223  | 1.064944936 |
|         | 0.527460521                                                                        | 1.097851275 | 0.873872775 |             |             |             |
| YJL054W | "YJL054W::TIM54::Translocase Inner Membrane, 54kD"                                 | 1           |             |             |             |             |
|         | 1.266941259                                                                        | 1.182810361 | 1.38576628  | 1.326912214 | 1           | 1.239931284 |
|         | 1.231121042                                                                        | 1.329704156 | 1.149061872 | 1           | 1.056867169 | 1.032073504 |
|         | 0.809609318                                                                        | 1.290244281 | 1           | 1.349176328 | 1.277630337 | 1.274125476 |
|         | 1.054735323                                                                        | 0.758152452 | 0.710985619 | 1           | 1.209787576 | 1.28386551  |
|         | 0.992313594                                                                        | 1.249558822 | 1.04972133  | 1           | 0.89784722  | 0.890552542 |
|         | 0.60037784                                                                         | 0.57495754  | 0.878465684 | 1           | 1.065331247 | 1.151697972 |
|         | 0.820362213                                                                        | 1.214385529 | 0.888174264 | 1.06738564  |             |             |
| YNL085W | YNL085W::MKT1::Protein involved in propagation of M2 dsRNA satellite of L-A virus  | 1           | 1           | 0.842591493 | 1           |             |
|         | 1.393289933                                                                        | 1.295603782 | 0.967275804 | 0.824322393 | 1           | 1.293485254 |
|         | 1.081539032                                                                        | 0.481876107 | 1.06675669  | 1           | 0.78345647  | 0.627403893 |
|         | 0.657316746                                                                        | 0.503701578 | 1           | 0.507648111 | 0.282833297 | 0.384042017 |
|         | 0.718227571                                                                        | 1           | 0.974439251 | 0.783531105 | 0.971860423 | 1.115239583 |
|         | 0.804073132                                                                        | 1           | 0.899889821 | 0.628042091 | 0.638274574 | 0.636291346 |
|         | 0.490865029                                                                        | 1           | 1.119100614 | 0.940755104 | 1.074281425 | 0.786075071 |
|         | 1.051797403                                                                        | 0.611185564 |             |             |             |             |
| YGL178W | YGL178W::MPT5::Product of gene unknown                                             | 1           | 1           | 2.283054588 |             |             |
|         | 1.608102046                                                                        | 1           | 1.835622839 | 1.647066689 | 1.75602084  | 1.742326661 |
|         | 1.422691845                                                                        | 3.171599475 |             | 0.345703046 |             |             |
|         |                                                                                    |             | 1.188052711 | 1.046495905 | 1.0354847   | 1           |
|         | 1.257029913                                                                        | 1.32290828  | 0.923377542 | 1.141278158 | 1           | 0.856369427 |
|         | 0.719045736                                                                        | 0.663168746 | 0.72381859  | 1.192599878 |             |             |
| YJL056C | YJL056C::ZAP1::Zinc-regulated DNA binding protein involved in zinc ion homeostasis | 1           | 1           |             |             |             |
|         | 1.014489256                                                                        | 1.206472674 | 1.060368305 | 1.698058765 | 1           | 0.896809478 |
|         | 0.710247572                                                                        | 0.456603601 | 1.872973276 | 1           | 0.591153345 | 0.437631999 |
|         | 0.582549609                                                                        | 1           | 0.488454689 | 0.408914942 | 0.229182465 | 0.417275574 |
|         | 0.866097939                                                                        | 0.837539152 | 0.981487811 | 1.154783042 | 0.880812349 | 1           |

|         |                                                                                  |             |             |             |             |             |   |
|---------|----------------------------------------------------------------------------------|-------------|-------------|-------------|-------------|-------------|---|
|         | 0.823214023                                                                      | 0.687656475 | 0.628097334 | 1.007539303 | 0.603952067 | 1           |   |
|         | 0.74951503                                                                       | 0.741465559 | 1.113656579 | 0.90977193  | 0.744768656 | 0.718011674 |   |
| YNL087W | YNL087W::YNL087W::molecular_function unknown                                     |             | 1           | 1.226705356 |             |             |   |
|         | 0.899446029                                                                      | 1.219332104 | 0.9086037   | 1           | 1.333640713 | 1.077781344 |   |
|         | 0.887115872                                                                      | 0.808455275 | 1           | 1.47907689  | 0.873557048 | 0.503635441 |   |
|         | 0.934134357                                                                      | 1           | 1.050570657 | 0.62227131  | 0.44775809  | 0.339010865 |   |
|         | 1.132734479                                                                      | 0.857673995 | 0.52580921  | 0.531608518 | 1           | 0.966941442 |   |
|         | 0.819237066                                                                      | 0.723828441 | 1.184627129 | 0.671374632 | 1           | 1.118173631 |   |
|         | 0.631577561                                                                      | 0.494855912 | 0.721315755 | 0.465205402 | 1           | 1.080882401 |   |
|         | 0.816168254                                                                      | 0.843388234 | 0.69875297  | 0.527324619 | 0.584041204 |             |   |
| YJL058C | YJL058C::BIT1::Binding Protein of Tor2                                           |             | 1           | 0.90163974  |             |             |   |
|         | 0.976856622                                                                      | 0.941961328 | 0.971447925 | 1           | 0.900796522 | 0.87671528  |   |
|         | 1.206013203                                                                      | 1           | 0.888296231 | 0.832796442 | 0.831442766 | 0.940529336 | 1 |
|         | 1.06795961                                                                       | 1.064339783 |             | 0.332951778 |             | 0.543567    |   |
|         | 1                                                                                | 0.952026316 | 0.958233168 | 0.935086347 | 0.75637796  | 0.916828089 | 1 |
|         | 0.833731132                                                                      | 0.965536648 | 1.051215481 | 0.937023454 | 0.900837534 | 1           |   |
|         | 1.056221339                                                                      | 1.018545886 | 1.047646367 | 0.777499451 | 1.040460739 | 0.945673958 |   |
| YGL180W | YGL180W::APG1::Required for autophagy                                            |             | 1           | 1.187526155 |             |             |   |
|         | 1.076272812                                                                      | 1.239019949 | 0.785697036 | 1           | 1.122149351 | 1.154510381 |   |
|         | 0.863048395                                                                      | 1           | 1.650769506 |             | 1           | 1.611199731 |   |
|         | 3.617933279                                                                      | 1.158042252 | 1           | 0.898394594 | 0.978400051 | 1           |   |
|         | 1.07597095                                                                       | 1.519578926 | 1.261423792 | 0.882827957 | 0.788300451 | 1           |   |
|         | 1.465418296                                                                      | 1.379190624 | 1.031555632 | 0.521432099 | 1           | 2.080492388 |   |
|         | 1.609123202                                                                      | 1.222254106 | 0.452271307 | 1.015951062 |             |             |   |
| YNL101W | YNL101W::YNL101W::molecular_function unknown                                     |             | 1           | 0.971183833 |             |             |   |
|         | 0.694886982                                                                      | 1.062212232 | 0.697144157 | 1           | 1.065257455 | 1.09584696  |   |
|         | 0.682993024                                                                      | 0.649435247 | 1           | 1.139220478 | 0.801397851 | 0.473951077 |   |
|         | 0.747410411                                                                      | 1           | 0.885302696 | 0.587571783 | 0.661649357 |             |   |
|         | 0.981796305                                                                      |             | 1           | 0.969815889 | 0.895962169 | 1.046920404 |   |
|         | 1.259928585                                                                      | 0.774577057 | 1           | 0.777001138 | 0.693605697 | 0.611596108 |   |
|         | 0.67198801                                                                       | 0.477143265 | 1           | 0.929057537 | 0.899830301 | 0.815381938 |   |
|         | 1.024625766                                                                      | 0.784559128 |             |             |             |             |   |
| YGL182C | YGL182C::YGL182C::molecular_function unknown                                     |             |             |             |             |             |   |
|         | 0.28759123                                                                       |             | 0.332822356 | 1           | 0.95851024  |             |   |
|         | 1.077013504                                                                      | 1           | 1.450613576 | 1.530568586 | 1.373305831 | 1.383667463 |   |
|         | 1.123314971                                                                      |             | 0.898768848 | 1.016975176 | 1           | 1.002447319 |   |
|         | 1.01930881                                                                       | 0.995973792 |             | 1.02633926  | 0.98245011  |             |   |
| YNL103W | YNL103W::MET4::member of the leucine zipper family of transcriptional activators |             | 1           | 0.971404244 | 0.921002615 | 1.109379865 |   |
|         | 0.863145711                                                                      | 1           | 1.109124431 | 1.053139855 | 0.894866958 | 1           |   |
|         | 1.021527661                                                                      | 1.010842805 | 0.633288177 | 1.200878579 | 1           | 0.769310854 |   |
|         | 0.745055962                                                                      | 0.831383636 |             | 0.816081038 | 0.877801944 | 0.882002558 |   |
|         | 0.863184428                                                                      | 1           | 0.846242981 | 0.975380584 | 0.710859425 | 0.69059511  |   |
|         | 0.892376753                                                                      | 1           | 0.940874532 | 0.882517541 | 0.818889196 | 1.179021428 |   |
|         | 1.19555325                                                                       | 1           | 1.072111597 | 1.308386896 | 1.411881798 | 1.130617048 |   |
|         | 1.105760536                                                                      | 0.976320768 |             |             |             |             |   |
| YGL184C | YGL184C::STR3::Sulfur TRansfer                                                   |             | 2.396084477 | 1.171843772 |             |             |   |
|         | 0.552138526                                                                      |             | 0.972214552 | 0.938018198 | 0.707539293 | 0.659161838 |   |
|         | 3.03578124                                                                       | 1.811869284 | 0.592462996 | 0.491452453 | 1           | 1.067827384 |   |
|         | 0.547827729                                                                      | 0.532084439 | 1           | 1.365841774 | 0.689702438 | 0.540141057 | 1 |
|         | 0.833409255                                                                      |             | 0.879510578 | 1.075526687 | 1           | 8.971369664 |   |
|         | 0.811735651                                                                      | 10.97007106 | 1           | 4.725464964 | 0.929220338 | 0.942667468 |   |
|         | 1.740397521                                                                      |             |             |             |             |             |   |
| YNL105W | YNL105W::YNL105W::molecular_function unknown                                     |             | 1           | 1.371427277 |             |             |   |
|         | 1.77813562                                                                       | 1.007861818 | 1           | 2.090837553 |             | 1           |   |
|         | 1.686265332                                                                      |             | 1.339258123 | 1           | 0.54336283  | 0.578301296 |   |

|         |                                                                                                                   |             |             |             |             |             |             |
|---------|-------------------------------------------------------------------------------------------------------------------|-------------|-------------|-------------|-------------|-------------|-------------|
|         | 0.927444924                                                                                                       | 0.50323579  | 1           | 0.789017511 | 3.179193361 | 0.964296794 |             |
|         | 0.340065338                                                                                                       | 1           | 0.801356292 | 0.861340556 | 0.91227834  | 1.010073625 | 1           |
|         | 1.020064456                                                                                                       | 0.650053689 | 0.770635892 |             | 0.912758824 | 1           | 1.082344941 |
|         |                                                                                                                   | 0.907146044 | 0.992082006 |             |             |             |             |
| YGL186C | YGL186C::YGL186C::molecular_function                                                                              | unknown     |             |             |             | 1.291620094 |             |
|         | 0.765285686                                                                                                       | 1.021985416 | 0.576612728 | 1.048490444 | 0.977559964 |             |             |
|         | 0.612140776                                                                                                       | 0.711200925 |             | 1.786746616 | 1.346473743 | 0.620508567 |             |
|         | 0.726409822                                                                                                       | 1           | 1.389665685 | 1.205355075 | 0.691267666 | 0.532084461 | 1           |
|         | 1.427626457                                                                                                       | 0.850215052 | 0.863089861 | 0.872443451 | 1           | 1.267396582 |             |
|         | 1.42759809                                                                                                        | 1.507467435 | 1.336039534 | 1.193104532 | 1           | 0.922949622 |             |
|         | 1.184825096                                                                                                       | 1.091806677 | 0.82210996  | 1.17879821  | 1           | 1.33666721  |             |
|         | 1.341483225                                                                                                       | 0.996428163 | 1.024677032 | 1.916748561 | 0.830091564 |             |             |
| YNL107W | YNL107W::YAF9::Yeast homolog of the human leukemogenic protein AF9; member of a yeast chromatin modifying complex |             | 1           | 0.87091237  | 1.149364988 |             |             |
|         | 0.982473909                                                                                                       | 1.208962796 | 1           | 0.939861407 | 1.110222919 |             | 1           |
|         | 0.978728638                                                                                                       | 1.080773874 | 1.24653795  | 1.043288645 | 1           | 1.11740302  |             |
|         | 0.938338036                                                                                                       | 1.526173916 | 1           | 1.26504728  | 1.610093751 | 1.371042162 |             |
|         | 0.929417836                                                                                                       |             | 1.189194025 | 1.373238277 | 0.871911313 | 0.805700176 |             |
|         | 0.959742636                                                                                                       | 1           | 1.248437324 | 1.491516859 | 1.075302604 |             | 1           |
|         | 1.051215478                                                                                                       | 1.200377038 | 1.448385348 | 1.218740314 | 1.417778051 | 0.911524592 |             |
| YNL109W | YNL109W::YNL109W::molecular_function                                                                              | unknown     |             |             |             | 1           | 1.218928061 |
|         | 1.495178257                                                                                                       | 0.837637693 | 1.338546806 | 1           | 0.962085209 | 1.006902359 |             |
|         | 1.396969228                                                                                                       | 1.190836745 | 1           | 0.896485969 | 1.07175168  | 1.26447949  |             |
|         | 0.941999817                                                                                                       | 1           | 1.19393955  | 1.086588246 | 0.873092681 | 1.03995444  | 1           |
|         | 1.337445098                                                                                                       |             | 1.043903618 | 0.802608073 | 1           | 0.895201991 | 1.060911701 |
|         | 0.736335718                                                                                                       | 0.786715138 | 0.788982596 | 1           | 1.158207133 | 1.558202085 |             |
|         | 0.959335247                                                                                                       |             | 1.614732751 | 1           | 1.033305143 | 1.419163982 | 1.080024026 |
|         | 1.518044811                                                                                                       | 0.96675146  | 1.344958476 |             |             |             |             |
| YNL111C | YNL111C::CYB5::cytochrome b5                                                                                      |             | 1           | 1.249812899 | 1.263454981 |             |             |
|         | 1.012815021                                                                                                       | 1.91055935  | 1           | 0.923313591 | 1.067143068 | 1.346320927 |             |
|         | 1.398285373                                                                                                       | 1           | 0.378512517 | 0.562057778 | 0.682933799 | 0.516069237 | 1           |
|         | 0.307090136                                                                                                       | 0.202009525 | 0.290829766 | 0.647649121 | 1           |             |             |
|         | 0.874393334                                                                                                       |             | 1           | 0.210504503 | 0.158151447 | 0.245692595 | 0.75439501  |
|         | 0.747313287                                                                                                       | 1           | 0.133832595 | 0.186465564 | 0.149838943 | 1.666559101 |             |
|         | 1.908426683                                                                                                       | 1           | 0.307685772 | 0.217842412 | 1.147422194 | 2.691205015 |             |
|         | 1.304173991                                                                                                       | 1.133933042 |             |             |             |             |             |
| YNL125C | YNL125C::ESBP6::Protein with similarity to mammalian monocarboxylate transporters MCT1 and MCT2                   |             | 1           | 1.032691189 | 0.780163533 | 0.834189301 |             |
|         | 0.553582502                                                                                                       | 1           | 1.0173659   | 1.081283952 | 0.721959752 | 0.696713084 | 1           |
|         | 1.538244965                                                                                                       | 0.979262712 | 0.745013841 | 0.738125113 | 1           | 1.950256458 |             |
|         | 1.613174705                                                                                                       | 2.096210431 | 1.069698377 | 1           | 0.633836837 | 0.558435086 |             |
|         | 0.517696126                                                                                                       | 0.339625733 | 1           | 0.967178376 | 1.195765922 | 1.234848727 |             |
|         | 1.400122606                                                                                                       | 0.830040554 | 1           | 0.68739664  | 0.716982218 | 0.794434672 |             |
|         | 0.919598186                                                                                                       | 1           | 0.756194284 | 0.82456213  | 0.9803332   | 0.821493567 |             |
|         | 1.028596865                                                                                                       | 0.746907259 |             |             |             |             |             |
| YJL060W | YJL060W::BNA3::Biosynthesis of Nicotinic Acid                                                                     |             | 1           | 1.868190837 |             |             |             |
|         | 1.798705927                                                                                                       | 1.658284374 | 1.453397553 | 1           | 1.635605237 | 1.404771885 |             |
|         | 1.346386403                                                                                                       | 1           | 1.726181745 | 1.992894138 | 1.907456517 | 1.021203879 |             |
|         | 1.01541112                                                                                                        | 0.830425515 | 0.544408417 |             |             |             | 1           |
|         | 1.112384966                                                                                                       | 1.002757714 | 1.053202009 | 1.200435162 | 0.933561539 | 1           |             |
|         | 1.261624544                                                                                                       | 1.031990317 | 1.090731869 | 0.95791091  | 0.892620953 | 1           |             |
|         | 1.286675776                                                                                                       | 1.054185407 | 0.956859951 | 0.978573291 | 0.959273408 | 0.887882787 |             |
| YJL074C | YJL074C::SMC3::involved in sister chromatid cohesion                                                              |             | 1           |             |             |             |             |
|         | 0.68955198                                                                                                        | 0.785129844 | 0.853105013 | 0.924821512 | 1           | 0.897202337 |             |
|         | 0.822492431                                                                                                       |             | 0.67110691  | 1           | 0.857620793 | 0.720989681 | 0.468509951 |
|         | 0.92899391                                                                                                        | 1           | 1.491829374 | 1.045494532 | 0.739897591 | 1.156164488 | 1           |
|         | 1.633730444                                                                                                       |             | 1.043667155 | 1           | 1.204896632 | 1.147016612 |             |

1.15119283 0.911541651 1.129262361 1 1.415376092 1.507747821  
1.73201855 1.393485765 0.815251162 1 1.232954087 1.771918839  
1.269288678 1.042069237 0.908686934 1.112042463  
YJL076W YJL076W::NET1::Nucleolar protein involved in exit from mitosis 1  
0.679226451 0.701161517 0.890871515 0.67504735 1 0.934564631  
0.933274936 0.69800289 0.674587489 1 0.88098688 0.723126088  
0.419313137 0.836308041 1 0.603588916 0.434353203 0.511227184  
0.580613003 0.837036052 0.771752283 0.735989703 1  
0.930012154 0.763260367 0.964233179 1.374460125 0.866303221 1  
0.834351172 0.474764863 0.786475262 0.880155374 0.433090044 1  
0.719119666 0.642001739 0.683556324 0.61772713 0.569841167 0.542886884  
YGL200C "YGL200C::EMP24::type I transmembrane protein, component of COPII-  
coated, ER-derived transport vesicles" 1 1.291511372 1.106138902  
0.926066265 1.226286892 1 1.018893727 0.953650564 1.259645102  
1.236525538 1 1.12863861 1.153060245 1.229973586 1.147960957 1  
0.999055056 0.712230182 0.68775288 1.084818561 1 1.58131129  
0.910500412 1.03952481 1.265916418 1 1.303323885 1.145469969  
1.026625477 1.001360723 1.09913207 1 0.932182556 1.294488741  
1.002345105 0.766297103 1.173863531 1 1.124434024 1.530818821  
1.155010346 1.443556672 1.354158893 1.362470939  
YJL078C "YJL078C::PRY3::Pathogen Related in Sc, contains homology to the  
plant PR-1 class of pathogen related proteins. The protein sequence is over 60%  
identical with the Pry2p & Pry3p over 145 resid. PRY1 is >35% identical (50%  
similar) to tobacco PR-1c protein." 1 0.869806968 0.65204917 0.61911439  
0.387922521 1 0.981648644 0.908694426 0.340645447 0.45371047 1  
1.027281379 0.953638485 0.607755129 0.469903856 1 0.897731855  
0.803051696 1.344999328 0.50632528 1 0.528815482 0.607003516  
0.446053237 0.368147969 1 1.242389571 0.990503577 1.304397909  
1.39978287 0.802682864 1 0.542099615 0.468993585 0.722124164  
0.378647263 0.375319979 1 0.55498144 0.551100043 0.936532369  
0.612095163 0.650707943 0.612061177  
YGL202W YGL202W::ARO8::aromatic amino acid aminotransferase 1  
1.302134194 0.904011774 0.778131094 0.423962744 1 1.136227992  
0.946510064 0.542256238 0.525657382 1 1.693978224 1.571045784  
0.815280397 0.583716236 1 1.096435929 1.18382772 0.893412405  
0.471214567 1 0.689008328 0.494309048 0.492675629 0.631683946 1  
1.029651403 0.870378456 1.344867366 1.155262818 0.79872451 1  
0.973754761 0.963912584 1.066984548 0.958848846 0.638982 1  
0.978881529 1.040544329 1.213523706 0.643905845 0.805524679 0.87825089  
YJL080C "YJL080C::SCP160::May be required during cell division for faithful  
partitioning of the ER-nuclear envelope membranes, involved in control of  
mitotic chromosome transmission" 1 0.78491641 0.79314892 0.925565298  
0.730875618 1 1.015257263 1.086866103 0.695539407 1  
0.9062148 0.643407535 0.449924857 0.736479312 1 0.660184604  
0.415906081 0.479244307 0.379541619 1 0.411035734 0.41932555  
0.334525005 0.354935558 1 1.008233933 0.739516514 0.873324701  
1.120888931 0.779022337 1 0.853142727 0.46233245 0.778752661  
0.640304735 0.377415485 1 0.818515748 0.651546846 0.725848688  
0.610139628 0.615431866 0.746031646  
YGL204C YGL204C::YGL204C::molecular\_function unknown 1 1.164736005  
1.239304774 1.387793875 1 1.068723023 1.222795682  
1.562198192 1 1.204003493 1.247200499 1.016110559 1.485846816 1  
0.574097315 0.628914999 0.807216603 1 0.569920645  
0.86964091 0.952737437 1.362224747 1.114755843 1  
0.702027344 0.39975349 0.773084935 1.486628671 0.588176606 1  
0.506427286 1.02766212 0.059088352 0.904189812 0.901017134



YJL082W YJL082W::IML2::Similar to Ykr018p 1 1.136520855 1.129219643  
1.283002533 0.899293799 1 1.401280053 1.457022711 0.799712012  
0.89301689 1 1.49000674 1.346956579 1.260766671 1.115753187 1  
2.158418668 1.391191713 1.071931444 1 1.614137817 1.221550976  
0.965735367 1 1.104936971 1.202993794 1.161087075 0.938696026  
0.965326253 1 1.131489503 0.644274933 1.193003137 0.777505838  
0.443576328 1 1.494710148 0.991662525 0.842594833 1.13369845  
0.86161404  
YGL206C YGL206C::CHC1::vesicle coat protein 0.850716031  
0.908483206  
1.286391556 1  
1.255387127 0.893128187 0.866782164 0.830564868 1 0.905243163  
0.995594599 0.957559393 1 0.65321637 0.895160464  
0.728135151 1.102356038 0.8034814 1.050748842  
YJL084C YJL084C::YJL084C::molecular\_function unknown 1 0.95776221  
0.934051079 1.287017158 0.980304905 1 1.229069833 1.161526143  
0.898876138 0.956462112 1 1.245264379 1.097694287 0.798516731  
0.988036452 1 1.246051705 1.610378051 0.791730396 1  
0.405533407 0.424410623 0.520121513 1 1.166667388 1.096794082  
0.959759766 1.165932853 0.781022357 1 1.024593692 0.711300823  
1.218619288 0.999789754 0.533202497 1 0.901266583 1.034107585  
0.828026496 0.921391926 0.808104302 0.630449305  
YNL127W YNL127W::YNL127W::molecular\_function unknown 1 0.732157825  
0.727187142 1.016418363 0.538446204 1 0.945620242 0.804495954  
0.583016157 1 0.939621558 0.955588418 0.569412259 0.866718201 1  
1.049927278 1.010759538 0.827843276 0.862308078 1 0.728904786  
0.9165541 1 0.816569041 0.946100547 0.988743605 0.911299353  
0.95411591 1 1.102548524 0.810614924 0.860607526 0.879306207  
0.676725117 1 0.88204261 0.864804853 1.191248979 0.77038712  
1.177110168 0.823962171  
YGL208W "YGL208W::SIP2::Member of a family of proteins, including Sip1p and Gal83p, that interact with Snf1p and Snf4p and are involved in the response to glucose starvation" 1 1.515136612 1.658781134 1.499441234 1.490839561 1  
1.609189863 1.598015991 1.475042554 1.50570673 1 1.706922158  
2.070979933 1.928530133 2.341131663 1 1.217877467 0.583376788  
0.987569917 1.069841204 1 1.452278557 2.147856827 1.520515406 1  
1.133149304 1.043353352 0.835615713 0.911997232 0.933723544 1  
0.943455301 1.115272246 1.664909637 1.131169317 1.1326141 1  
1.238270583 0.980441834 1.065801352 0.45943471 1.544698832 0.901017134  
YJL098W "YJL098W::SAP185::SIT4 associated protein, MW of 185 kDa" 1  
0.651806133 0.596655033 0.953825024 0.681703254 1 0.818916265  
0.769507858 0.692586739 0.783335462 1 0.384393898 0.382027752  
0.270064627 0.944098309 1 0.30972025 0.434520495 0.528513196 1  
0.361315623 0.552988264 0.409996755 1 0.514401805 0.437277851  
0.579146203 0.790027499 0.74342816 1 0.580223762 0.680148679  
0.567891486 0.94304817 0.767887145 1 0.469689583 0.769511077  
0.927258894 1.134439701 0.426149319 0.636578646  
YNL129W YNL129W::YNL129W::molecular\_function unknown 1 0.760903172  
1.114052613 0.682726204 1.310382317 1 0.671689244 0.748180875  
1.001594125 1 0.889507399 1.050340183 0.823799522 0.759249875 1  
0.849618591 0.502046768 0.522291375 0.978835637 1 2.028425702  
2.50467663 2.238740451 1.298527222 1 0.814267007 0.906434812  
0.573291485 0.539323807 0.930897559 1 1.148165878 1.574645174  
1.384845361 1.320434603 1.897265312 1 1.240005785 1.343874131  
1.221909665 1.513175677 1.31080911  
YJL100W YJL100W::LSB6::LAs17 Binding protein 1 0.984389609  
1.026458897 1.043283029 0.707409938 1 1.130829798 1.118777285

0.93452256 0.985814389 1 1.572095785 1.655674448 1.161069435 0.804319  
1 1.809436998 1.372407502 1.740956985 1.31002863 1 1.822807661  
2.394964313 1.703683047 0.761429762 1 1.338098461 1.453265007  
1.358086181 1.125996873 0.974132292 1 0.926737351 0.820405434  
1.105750046 1.040961425 1 1.111156712 1.02285383 1.305414192  
0.826373117 1.075618799 1.078768762  
YGL210W YGL210W::YPT32::probably involved in intra-Golgi transport or in the  
formation of transport vesicles at the most distal Golgi compartment 1  
0.939976539 1.123934391 1.077267724 1 0.841012983 0.882581653  
1.218571967 1 0.878932153 0.822020496 2.557070304 1.062701487 1  
0.714612752 0.663847729 0.561053467 1.076500588 1 1.3606346  
0.906788883 1.041810238 1.402246843 1 0.934576776 0.825497209  
0.702309027 0.80629568 0.941757188 1 0.950740494 1.069766286  
0.995296582 1.118716678 1.761953851 1 0.831411662 1.034728254  
0.980917299 1.052274013 0.959920614 1.327446012  
YJL102W YJL102W::MEF2::mitochondrial elongation factor G-like protein 1  
0.766766437 1.102169243 1.138709855 0.913487688 1 1.32543914  
1.325525632 0.922339038 0.877248765 1 1.136944891 1.179956913  
1.093879253 1 1.521660531 0.938540671 1.753236087 1.347631988 1  
1.519952159 2.231617556 1.351671823 0.786800072 1 1.087225253  
1.313764056 0.796876948 0.847280333 0.947214477 1 1.216774723  
0.992364222 1.021255052 0.597886432 0.543169565 1 1.40355226  
1.086794869 0.936289925 1.410410306 1.006967579  
YNL131W YNL131W::TOM22::Translocase of Outer Mitochondrial membrane  
1.055212951 0.95660709 0.966078169 1.023022563 1.02185441  
0.841360582 0.940735772 1.027152549 0.740258075 0.77001796  
1.001461054 0.663754516 1.107107321  
0.995814753 1 1.191703336 1.25841236 1.68065689 1.484172118  
1.417300243 1 1.164305427 0.749094731 0.887756973 1.202794151  
0.655984541 1 0.777096725 0.651498824 0.838117094 0.791807202  
0.865508577 0.644459265  
YGL224C YGL224C::SDT1::suppressor of deletion of TFIIS 1 1.703288248  
1.306641706 1.15178708 1.498109474 1 1.245443794 1.094179793  
1.608231916 1.433872385 1 1.841563187 1.161279301 0.901554672  
1.380557631 1 0.823082014 0.651893304 0.706740202 1  
1.321028005 0.985351391 1.456406345 1 0.85805094 0.690576154  
0.569901316 0.796381127 0.735685486 1 0.924202667 0.895262031  
1.226209826 0.913220316 1.127264151 1 1.264645778 1.270885659  
1.168802783 0.858697238 1.310675169 1.303804103  
YNL133C YNL133C::FYV6::Function required for Yeast Viability on toxin  
exposure 1 0.902577918 1.176418566 0.888995761 1.426407261 1  
0.984765021 1.510680292 1.443420294 1 0.949035082 1.395601031  
1.223290653 1 0.910945386 0.548939982 0.625894436 1.111839373 1  
1.982165947 2.661809007 2.303158462 1.725209399 1 0.904176842  
0.978102516 0.72960654 0.669088543 0.913353013 1 1.508599477  
1.43423522 1.187929517 1.640460035 1.853401786 1  
1.187201553 1.274697767 1.549414514  
YGL226W YGL226W::YGL226W::molecular\_function unknown 0.625493816  
0.957745961 1.224690265 0.598099617 0.682095213  
1.125035599 0.760753771 0.834538686 2.290389405 1.133669255 1  
0.964236243 1.048107547 0.643656351 1.303119978 1 2.104916221  
2.412676866 2.12814165 1.705010732 1 0.967976759 1.171390674  
0.766050417 0.667989224 0.988016022 1 1.272827211 1.941098731  
1.962094255 1.800665854 2.493324044 1 1.286462518 1.71650756  
1.444779109 1.376009614 1.477729726 1.446530805  
YNL135C YNL135C::FPR1::FK506 binding protein; proline rotamase; rapamycin-  
binding protein 1 1.59447014 1.727743021 1.107261141 1.564463167 1

|             |                                                                                                                                |             |             |             |             |
|-------------|--------------------------------------------------------------------------------------------------------------------------------|-------------|-------------|-------------|-------------|
| 1.254661903 | 1.324750035                                                                                                                    | 1.854576993 | 1.897468902 | 1           | 1.163282722 |
| 1.237097449 | 1.661606624                                                                                                                    | 1.325237698 | 1           | 1.212396392 | 0.761282425 |
| 0.826235779 | 1.446754881                                                                                                                    | 1           | 1.481762382 | 1.714368113 | 1.51940994  |
| 1.100717192 | 1                                                                                                                              | 0.988538762 | 1.065018837 | 0.923836695 | 0.979241307 |
| 0.895639501 | 1                                                                                                                              | 0.979459472 | 1.105401477 | 0.844337143 | 0.764436941 |
| 1.105843846 | 1                                                                                                                              | 0.939864693 | 0.903891922 | 0.753609941 | 1.054893347 |
| 1.104412517 | 1.144440604                                                                                                                    |             |             |             |             |
| YGL228W     | YGL228W::SHE10::Mrna (identified by a library screen) that causes growth arrest when overexpressed                             |             |             |             |             |
|             | 1                                                                                                                              | 0.895332498 | 0.719471934 | 1.097461476 |             |
| 0.788165526 | 1                                                                                                                              | 0.9958634   | 1.010472926 | 0.814549076 | 1           |
| 0.875440937 | 1.013200026                                                                                                                    | 0.586058438 | 1.016101596 | 1           | 1.330344808 |
| 1.088810428 | 1.06339064                                                                                                                     | 0.782527709 |             | 1.693863035 | 0.71230553  |
| 0.965598963 | 1.343697561                                                                                                                    | 1           | 1.025500364 | 0.885094779 | 0.91570281  |
| 0.917284595 | 0.976385365                                                                                                                    | 1           | 0.909830001 | 0.940552528 | 0.829829633 |
| 0.771866096 | 0.600383532                                                                                                                    | 1           | 0.919320189 | 1.035365829 | 1.250545667 |
| 0.782435089 | 1.000815613                                                                                                                    | 0.959683866 |             |             |             |
| YNL149C     | YNL149C::YNL149C::molecular_function unknown                                                                                   |             |             |             |             |
|             | 1                                                                                                                              |             |             | 1.151285815 |             |
| 1.322341824 | 0.950873883                                                                                                                    | 1.612068972 | 1           | 0.903634491 | 0.82740315  |
| 1.764592761 | 1.56761426                                                                                                                     | 1           | 0.991821237 | 1.257518116 | 1.616264159 |
| 1.204662499 | 1                                                                                                                              | 1.121453675 | 0.930294539 | 0.904817701 | 1.484629665 |
| 1.805695271 | 2.134350536                                                                                                                    | 1.865274213 | 1.328593928 | 1           | 1.017003895 |
| 1.313451866 | 0.973777768                                                                                                                    | 0.764301286 | 0.964991405 | 1           | 1.228925923 |
| 1.818080534 | 1.554477505                                                                                                                    | 1.116379567 | 1.848272504 | 1           | 1.442048041 |
| 1.929358844 | 1.231602737                                                                                                                    | 1.449841532 | 0.979912961 | 1.324819122 |             |
| YGL230C     | YGL230C::YGL230C::molecular_function unknown                                                                                   |             |             |             |             |
|             |                                                                                                                                |             |             | 1.024430805 |             |
|             | 1.156162383                                                                                                                    |             | 1.164284857 | 1.072996512 |             |
| 0.840325536 | 0.78059512                                                                                                                     | 1.265556913 | 0.978989    | 1           |             |
| 1.41411391  | 1                                                                                                                              | 1.257515982 | 2.609217127 | 2.269758718 | 0.880729522 |
| 1.159717755 | 1.316237918                                                                                                                    | 1.262557002 |             | 1.301116778 | 1           |
| 1.044974498 |                                                                                                                                | 2.013997638 | 1           | 1.079218    | 1.170794874 |
| 1.308891536 |                                                                                                                                | 1.04199261  |             |             |             |
| YNL151C     | YNL151C::RPC31::31-kDa subunit of RNA polymerase III (C); HMG1 like protein                                                    |             |             |             |             |
|             | 1                                                                                                                              | 0.893490376 | 1.01764573  | 0.893732854 | 1.081417185 |
| 0.783972934 | 0.828613279                                                                                                                    | 0.987658067 | 1.138348562 | 1           | 0.846721781 |
| 0.715292517 | 0.844828078                                                                                                                    | 0.97857068  | 1           | 0.742647747 | 0.527701684 |
| 0.799049348 | 0.767661027                                                                                                                    | 1           | 0.984579925 | 1.1523824   | 0.802219844 |
| 0.606744119 | 1                                                                                                                              | 0.871350018 | 0.828533065 | 0.663037071 | 0.754896861 |
| 0.894604338 | 1                                                                                                                              | 0.854875576 | 0.96358443  | 0.652076537 | 1.069261879 |
| 1.478165217 | 1                                                                                                                              | 0.957036913 | 1.116608329 | 1.057997589 | 1.585059752 |
| 1.031424616 | 1.006967579                                                                                                                    |             |             |             |             |
| YNL153C     | "YNL153C::GIM3::Prefoldin subunit 4; putative homolog of subunit 4 of bovine prefoldin, a chaperone comprised of six subunits" |             |             |             |             |
|             | 1                                                                                                                              |             |             | 0.9879633   |             |
| 1.250556504 | 0.948448437                                                                                                                    | 1.576626203 | 1           | 0.92566939  | 0.84732875  |
| 1.540035698 | 1.357756166                                                                                                                    | 1           | 0.948030612 | 0.975997834 | 1.189459619 |
| 1.08402284  | 1                                                                                                                              | 1.080799238 | 0.681631049 | 0.899169136 | 1.224301415 |
| 1.234634201 | 1.219627363                                                                                                                    | 1.281832124 | 0.901586942 | 1           | 1.139412649 |
| 1.335387475 | 1.045757361                                                                                                                    | 1.038050447 | 1.211706158 | 1           | 1.119676993 |
| 1.647604525 | 1.225683794                                                                                                                    | 1.186253623 | 2.054339468 | 1           | 1.069872663 |
| 1.546993471 | 1.039739625                                                                                                                    | 1.901439517 | 1.408016338 | 1.374729726 |             |
| YNL155W     | YNL155W::YNL155W::molecular_function unknown                                                                                   |             |             |             |             |
|             |                                                                                                                                |             |             | 1           | 1.026036776 |
| 1.428725591 | 1.47671281                                                                                                                     | 1.640589022 | 1           | 1.291845006 | 1.396571832 |
| 1.588942787 | 1.379187532                                                                                                                    | 1           | 1.143679323 | 1.912410661 | 2.049949928 |
| 1.171013111 | 1                                                                                                                              | 1.608564524 | 1.76778108  | 1.932484034 | 1.984671554 |
| 1.522516284 | 1.491250558                                                                                                                    | 2.44646125  | 1.210654174 | 1           | 0.979591129 |
| 1.80800648  | 1.281201998                                                                                                                    | 0.708262839 | 1.108566943 | 1           | 1.182750464 |
| 1.75956477  | 1.490290794                                                                                                                    | 0.896924159 | 1.192954718 | 1           | 1.55642566  |
| 1.817883358 | 1.182694454                                                                                                                    | 1.016410402 | 1.569870148 | 1.348460927 |             |

YNL157W YNL157W::YNL157W::molecular\_function unknown 1 1.180151086  
 1.483046707 1.244779938 1.797945574 1 1.068547245 1.064208844  
 1.713647773 1.727875524 1 1.065844016 1.404192992 1.979192176  
 1.497832944 1 1.194702519 1.038183365 1.015345094 1.356731903 1  
 1.833157292 1.999154414 1.678567276 1 1.089261358 1.413793461  
 1.039418494 0.870073398 1.124779034 1 1.03032169 1.479437724  
 1.172798565 1.032119551 1.876563386 1 1.09281058 1.422248086  
 1.194398402 1.900362923 1.342995419 1.376480951  
 YDR179WA YDR179WA::YDR179W-A::molecular\_function unknown 1 0.983395112  
 0.971145149 0.942843074 0.956318009 1 0.948996915 0.888897561  
 1.216928798 1 0.878507051 0.841403881 0.915949353 1.418411658 1  
 0.679816303 0.619063295 1.226562141 1 1.499611451 2.039375811  
 1.572580875 1.003845296 1 0.91565112 1.076697162 0.841819774  
 0.943738548 1.067617448 1 1.397238923 1.842830681  
 2.401498865 0.755623564 1.007195796 0.869604285 0.942319628  
 1.187346097  
 YDR243C YDR243C::PRP28::Required for the first step of splicing in vitro 1  
 0.661840041 0.69936752 0.91084653 0.586204091 1 0.755625117  
 0.785738273 0.901063288 0.779063102 1 0.769308439 0.672106471  
 0.519936033 0.969636592 1 0.5048257 0.589994551 1  
 1.320431507 0.949486927 1 1.063146697 1.04958031  
 1.073308865 1.032220821 1.101049869 1 0.926420131 0.810907481  
 0.751789012 1.192529617 1.08012635 1 0.698000347 0.657267733  
 0.851745022 0.668635185 0.700563026 1.191724213  
 YJL104W YJL104W::MIA1::Hypothetical ORF 1 0.802445748 1.291343149  
 1.078384484 1.575152432 1 0.911884164 1.073744747 1.526161046  
 1.582442575 1 0.836093057 1.012529267 1.115852985 1.197747871 1  
 0.833884098 0.662304248 0.491292961 1.224279906 1 1.094219944  
 1.57571616 1.261466278 0.809679376 1 1.161978343 1.328736684  
 0.644835677 0.650122796 0.976968567 1 1.296605601 2.000394907  
 1.726051093 1.305980779 2.211016754 1 1.130766338 1.311737003  
 1.936237524 1.269060199 1.238132366  
 YJL106W "YJL106W::IME2::Positive regulator of meiosis, dispensable for  
 mitosis, stimulates early, middle and late gene expression and negatively  
 regulates IME1" 1 0.813147835 0.788057393 0.750341273 1  
 0.837735803 1.002786251 1 0.79439144 0.728753497 0.824464167  
 0.717956494 1 0.979072853 0.966243123 1.000359897 1.237269974 1  
 0.819532071 1.252103923 1.136557265 1 1.195383532 1.423176788  
 1.105930799 1.104594962 1 0.737980092 0.915548581  
 0.579798518 0.968395864 1 0.977435004 0.997514426 0.882228566  
 0.646698564 0.880877781  
 YJL108C YJL108C::PRM10::pheromone-regulated membrane protein 1  
 1.119789228 1.035693652 1.482493828 0.927833124 1  
 1.217564566 1 0.978393202 0.836740833 0.942342965 0.864494628 1  
 0.905154782 0.964578512 1.009680797 1.023139722 1 0.852272097  
 2.394504889 1.945757069 1.029666164 1 0.968843615 0.78582027  
 0.983173643 0.83461743 1 0.425359633 0.52319006 0.851175997  
 1.441279651 1 0.621026719 0.725229225 0.428369532  
 0.76879789  
 YGL232W YGL232W::YGL232W::molecular\_function unknown 1 0.852616125  
 1.045225264 0.79946876 1.252503402 1 0.747844734 0.794338555  
 1.106151169 1.006470731 1 0.799036484 0.916615945 0.977963936  
 0.909562725 1 0.893920627 0.694504498 0.652710629  
 1.024466954 0.881156558 1.131580246 0.867532908 1 0.853967701  
 1.028884246 0.640685291 0.652204393 0.956830357 1 1.029008174  
 1.569376098 1.233782282 1.162274233 2.131880772 1 1.092314974  
 1.915202397 1.208373216 1.495247054 1.448282134

YJL122W YJL122W::YJL122W::molecular\_function unknown 1 1.114053638  
1.156158504 0.810027727 1.427332259 1 0.927392793 0.841338063  
1.758789673 1 0.625431993 0.499402529 0.621595518 0.924461992 1  
0.272506885 0.19480808 0.185153109 0.522659006 1 0.463603563  
0.363095477 0.206772673 0.814473424 1 0.928619181 0.498871803  
0.535046581 0.853008281 0.87817967 1 0.603314643 0.708018047  
0.560393423 1.180086527 1.803546087 1 0.493077951 0.577680301  
0.862844962 1.283387946 0.502339903 1.095405665  
YGL234W "YGL234W::ADE5,7::glycinamide ribotide synthetase and aminoimidazole  
ribose synthetase" 1 0.924581875 0.446576382 0.593733761 0.234536556 1  
0.961095085 0.751468595 0.317515128 1 1.299777086 1.063408472  
0.275084356 0.436410272 1 1.004388325 1.00405877 0.339811768  
0.14053191 1 0.673058971 0.310107016 0.123273599 0.195380044 1  
0.851304717 0.648459824 0.723141963 1.285916394 1.099112198 1  
0.526737513 0.347783329 0.364934944 0.548341689 0.820433676 1  
0.583910667 0.398775392 0.633563907 0.559623037 1.974043451 0.526250034  
YJL124C "YJL124C::LSM1::Like Sm protein; the finding that Lsm1 contains the  
Sm consensus motifs and most closely resembles Sm-B has been controversial  
(Fromont-Racine et al, 1997 Nature Genetics 16:277-282, and Bertrand Seraphin,  
personal communication)." 1 0.842651499 1.284279381 0.891431999  
1.713260699 1 0.927075765 0.954977601 1.253042866 1.253652457 1  
0.914591673 1.003517141 1.075413453 1.03235769 1 0.953117988  
0.611261977 0.63582289 1.110577819 1 1.529742773 1.641791646  
2.347379944 1.262709359 1 1.185081172 1.204484641 0.80535796  
0.692679417 0.966691701 1 1.084354275 1.642267927 1.280236647  
0.837061732 1.502804936 1 1.087642637 1.330548184 0.896764025  
1.33048412 1.383534838 1.027106933  
YGL248W "YGL248W::PDE1::3',5'-Cyclic-nucleotide phosphodiesterase, low  
affinity" 0.863132156 0.82678188 0.922470437 0.812544254  
0.862038351 0.931427925 0.904961377 1.072996512 0.882522616  
1.193104798 0.954718389 1.003463702 1 1.69329494 1.227795255  
1.129435415 1.17138171 1 2.037671115 1.257169143 1  
1.088664759 1.097039244 1.026534181 0.920238337 1.000575344 1  
0.921583115 0.841147576 0.859226992 1.000586707 1 0.778233986  
0.8982945 1.069112421 0.518594045 1.011303443 0.803822817  
YJL126W "YJL126W::NIT2::Nit protein, nitrilase superfamily member" 1  
0.81906327 1.01475237 1.208543857 1.084126526 1 0.974277308  
1.101691894 1 0.691021945 0.822041122 1.054566342 1.184481121 1  
0.817410228 0.865617937 1.111360333 1.29022427 1 0.988836787  
2.582879494 2.041883658 1.865059896 1 0.982877594 1.01991806  
0.961183585 0.835950765 1.011581478 1 0.985615669 1.098890062  
1.406868797 1.092507499 1.162271781 1 1.069418121 0.979794381  
0.989198146 0.840847977 1.124941579 1.090151884  
YGL250W YGL250W::YGL250W::molecular\_function unknown 1 1.070840062  
1.097637895 0.918490799 0.952785908 1 0.950371233 1.036689339  
1.125689443 1 1.098187727 1.249752573 1.273459381 1.008107231  
1 1.149964154  
0.923396374 0.983801839 1.098802381 1.007044224 1 0.727992044  
0.797157037 0.716094576 0.890974095 1 1.183809398 0.911234723  
0.907960163 0.625057818 1.902489249 1.109415573  
YJL128C "YJL128C::PBS2::Involved in osmoregulation, member of the HOG1  
mitogen-activated protein kinase (MAPK) cascade" 1 0.690716862  
0.833275302 0.829586069 0.747122682 1 0.990674865 1.016276687  
0.638517693 1 0.895443108 0.950357066 0.609562163 0.810298072 1  
1.237666662 0.990935684 1.12291036 0.810076303 1 0.940678604  
1.090979071 0.808508753 1 1.306102905 1.317419538 1.296309328  
1.133559072 1.07451605 1 1.330832151 0.945972773 1.400066139

|         |                                                                                                                                        |             |             |             |             |             |   |             |             |
|---------|----------------------------------------------------------------------------------------------------------------------------------------|-------------|-------------|-------------|-------------|-------------|---|-------------|-------------|
|         | 0.931572466                                                                                                                            | 0.482055467 | 1           | 1.133129826 | 0.998522007 | 0.960457803 |   |             |             |
|         | 0.803392786                                                                                                                            | 0.811955522 | 0.560399347 |             |             |             |   |             |             |
| YNL159C | "YNL159C::ASI2::Amino acid Sensor-Independent (ASI) genes encode membrane proteins Asilp, Asi2p and Asi3p."                            |             |             |             |             |             | 1 | 1.031715986 | 1.054615233 |
|         | 1.125512711                                                                                                                            | 0.977961514 | 1           | 1.092222871 | 1.086494249 | 1.165013211 |   |             |             |
|         | 0.872358228                                                                                                                            | 1           | 1.209639151 | 1.228129231 | 1.129214299 | 1.056816605 | 1 |             |             |
|         | 1.301702017                                                                                                                            | 0.966404919 | 1.2793904   | 1.302613571 | 1           | 1.46099409  |   |             |             |
|         | 1.079246636                                                                                                                            | 1.488527266 | 1.474370171 | 1           | 1.126694091 | 1.496117615 |   |             |             |
|         | 1.169165798                                                                                                                            | 1.030305236 | 1.178399693 | 1           | 1.206454929 | 1.293224554 |   |             |             |
|         | 1.101896485                                                                                                                            | 1.131790147 | 1.283176823 | 1           | 1.149710897 | 1.26190818  |   |             |             |
|         | 1.219908088                                                                                                                            | 0.935433231 | 1.648626643 | 1.020977592 |             |             |   |             |             |
| YJL130C | YJL130C::URA2::First and second steps of pyrimidine biosynthesis                                                                       |             |             |             |             |             | 1 |             |             |
|         | 1.219898891                                                                                                                            | 1.000485892 | 1.321716875 | 0.870516665 | 1           | 1.217645918 |   |             |             |
|         | 1.159832183                                                                                                                            | 0.843996039 | 1.087197339 | 1           | 1.211232272 | 1.021933702 |   |             |             |
|         | 0.730623961                                                                                                                            | 1.105955444 | 1           | 1.178847328 | 1.149738896 | 1.231894299 | 1 |             |             |
|         | 0.595174085                                                                                                                            | 0.502448428 | 0.443607412 | 1           | 1.076920835 | 0.836212073 |   |             |             |
|         | 1.151657355                                                                                                                            | 1.18205443  | 1.10689397  | 1           | 0.821621492 | 0.797818433 |   |             |             |
|         | 1.373068486                                                                                                                            | 1.346909191 | 0.592012057 | 1           | 0.848854278 | 0.842692229 |   |             |             |
|         | 0.894177103                                                                                                                            | 0.702853378 | 0.791564082 |             |             |             |   |             |             |
| YGL252C | "YGL252C::RTG2::Protein involved in interorganelle communication between mitochondria, peroxisomes, and nucleus"                       |             |             |             |             |             | 1 | 0.721249919 | 0.680682093 |
|         | 0.79476631                                                                                                                             | 0.704091909 | 1           | 0.801897251 | 0.758345918 | 0.754728254 |   |             |             |
|         | 0.667476887                                                                                                                            | 1           | 1.106753247 | 1.102462467 | 0.722264639 | 0.852628681 | 1 |             |             |
|         | 1.382029746                                                                                                                            | 1.037990985 | 1.108829984 | 0.973242191 | 1           | 1.389016156 |   |             |             |
|         | 1.163965113                                                                                                                            | 0.922176233 | 1.05208419  | 1           | 1.466765572 | 1.492723545 |   |             |             |
|         | 0.919730462                                                                                                                            | 0.843909315 | 1           | 1.703729857 | 1.695897757 | 1.855588594 |   |             |             |
|         | 1.312706268                                                                                                                            | 1.21537566  | 1           | 1.540638444 | 1.454033417 | 1.051868297 |   |             |             |
|         | 0.684795987                                                                                                                            | 1.013937683 | 0.964937646 |             |             |             |   |             |             |
| YJL132W | YJL132W::molecular_function_unknown                                                                                                    |             |             |             |             |             | 1 | 1.068313964 |             |
|         | 1.181510103                                                                                                                            | 1.348395398 | 1.393946456 | 1           | 1.117309116 | 1.309015099 |   |             |             |
|         | 1.239623911                                                                                                                            | 1.343347364 | 1           | 1.078477325 | 1.341394932 | 1.753227368 |   |             |             |
|         | 1.25540881                                                                                                                             | 1           | 1.383101095 | 1.406649352 | 1.135432596 | 1           |   |             |             |
|         | 1.230436708                                                                                                                            | 2.087187999 | 1.457218698 | 1.149018637 | 1           | 0.926423727 |   |             |             |
|         | 1.081720328                                                                                                                            | 1.032137938 | 1.022006669 | 1           | 1.162863277 | 1.021239991 |   |             |             |
|         | 1.572327265                                                                                                                            | 2.181033306 | 1.146580752 | 1           | 1.201764331 | 1.087142335 |   |             |             |
|         | 1.493002139                                                                                                                            | 1.21647895  | 1.544123263 | 0.815205939 |             |             |   |             |             |
| YNL173C | "YNL173C::MDG1::multicopy suppressor of bem1 mutation, may be involved in G-protein mediated signal transduction; binds cruciform DNA" |             |             |             |             |             | 1 |             |             |
|         | 1.49131746                                                                                                                             | 1.703168314 | 1.225212136 | 1           | 1.448742295 | 1.585889911 |   |             |             |
|         | 1.407495619                                                                                                                            | 1.622542942 | 1           | 1.162948189 | 1.672467732 | 1.671172683 |   |             |             |
|         | 1.518098795                                                                                                                            | 1           | 1.478870531 | 1.468491627 | 1.105376105 |             |   |             |             |
|         | 1.30619535                                                                                                                             | 0.729466918 | 1           | 0.892855215 | 1.261315409 |             |   |             |             |
|         | 1.211041661                                                                                                                            | 0.614722843 | 1.008369397 | 1           | 1.04343928  | 0.64852585  |   |             |             |
|         | 1.007237743                                                                                                                            | 0.908227712 | 0.527431707 | 1           | 1.009018436 | 0.707377026 |   |             |             |
|         | 1.205098823                                                                                                                            | 0.696237574 | 2.165710998 | 0.661096116 |             |             |   |             |             |
| YGL254W | YGL254W::FZF1::involved in sulfite resistance                                                                                          |             |             |             |             |             | 1 | 0.827595863 |             |
|         | 0.653290904                                                                                                                            | 1.138794675 | 0.517404158 | 1           | 0.849547806 | 0.883394322 |   |             |             |
|         | 0.754500319                                                                                                                            | 1           | 0.822225396 | 0.806418198 | 0.715430055 | 1           |   |             |             |
|         | 0.678541946                                                                                                                            | 1.700317086 | 1.430750815 | 0.591890849 | 1           | 0.521884183 |   |             |             |
|         | 0.556404415                                                                                                                            | 0.294191025 | 0.310799115 | 1.060231492 | 1.053859127 |             |   |             |             |
|         | 1.222608891                                                                                                                            | 1.185564372 | 1           | 0.879107588 | 0.755282593 | 1.029703218 |   |             |             |
|         | 1.041160888                                                                                                                            | 0.72871392  | 1           | 0.537877904 | 0.547363933 | 0.688782017 |   |             |             |
|         | 0.553394393                                                                                                                            |             |             |             |             |             |   |             |             |
| YJL146W | YJL146W::IDS2::IME2-Dependent Signalling                                                                                               |             |             |             |             |             | 1 | 0.809109301 |             |
|         | 0.877143823                                                                                                                            | 0.807683847 | 0.821102721 | 1           | 0.878557711 | 0.844185552 |   |             |             |
|         | 0.840050465                                                                                                                            | 0.884771983 | 1           | 0.873864552 | 0.874054297 | 0.86532754  |   |             |             |
|         | 0.865569818                                                                                                                            | 1           | 1.038722765 | 0.711431232 | 1.113597411 | 1           |   |             |             |

|             |                                                            |             |             |             |             |             |
|-------------|------------------------------------------------------------|-------------|-------------|-------------|-------------|-------------|
| 0.919320082 | 1.67047224                                                 | 1.229304167 | 1.029697151 | 1           | 1.156508185 |             |
| 1.236238029 | 1.0238239                                                  | 0.851700856 | 0.919929781 | 1           | 0.74098815  |             |
| 0.890164963 | 1.037668087                                                | 0.843938747 | 0.792488883 | 1           | 1.222582306 |             |
| 1.193373825 | 1.152871891                                                | 0.889772524 | 1.074390646 |             |             |             |
| YNL175C     | YNL175C::NOP13::Nucleolar Protein 13                       |             |             | 1           | 0.956450511 |             |
| 0.81393755  | 0.825451119                                                | 1.061503477 | 1           | 0.781077037 | 0.707566325 |             |
| 0.955713835 | 1.067330875                                                | 1           | 0.617923137 | 0.395891096 | 0.33847542  |             |
| 0.909615644 | 1                                                          | 0.292659297 |             | 0.188195157 | 0.291474472 | 1           |
| 0.459782946 | 0.40521236                                                 | 0.301730444 | 0.421244019 | 1           | 0.739748885 |             |
| 0.522700972 | 0.551239682                                                | 0.809347603 | 0.794492646 | 1           | 1.119260505 |             |
| 0.68585092  | 0.442148105                                                | 1.032364168 | 1.210921956 | 1           | 0.800985502 |             |
| 0.620003715 | 0.72171194                                                 | 1.015334868 | 0.45967445  | 0.830967177 |             |             |
| YGL256W     | YGL256W::ADH4::Alcohol dehydrogenase type IV               |             |             | 1           | 1.061735278 |             |
| 0.68535386  | 1.01582632                                                 | 0.898178494 | 1           | 0.961667489 | 0.855519238 |             |
| 0.81098979  | 1.07794793                                                 | 1           | 0.881814637 | 0.583613909 | 0.545811029 |             |
| 0.952214331 | 1                                                          | 1.204497108 | 0.451319698 | 0.417170745 | 0.300614054 | 1           |
| 1.321924982 | 0.606300933                                                | 0.471146688 | 0.452781827 | 1           | 0.822327961 |             |
| 0.471644605 | 0.495403296                                                | 1.011631707 | 1.010673684 | 1           | 0.501433062 |             |
| 0.274927652 | 0.247528319                                                | 0.400050439 | 0.624834646 | 1           | 0.689631268 |             |
| 0.362178443 | 0.658300084                                                | 0.432413449 | 0.925589104 | 0.896639019 |             |             |
| YNL177C     | YNL177C::YNL177C::molecular_function unknown               |             |             | 1           | 0.927689436 |             |
| 1.167751267 | 1.07926197                                                 | 1.317683061 | 1           | 1.038310165 | 0.94704801  |             |
| 1.335641139 | 1.108465621                                                | 1           | 0.975336004 | 1.127434784 | 1.075183763 |             |
| 0.974402936 | 1                                                          | 1.133205874 | 0.848058852 | 0.876655933 | 1.237776751 | 1           |
| 1.412717126 | 1.501316553                                                | 1.906055214 | 1.162051811 | 1           | 0.926098857 |             |
| 0.97735938  | 0.626896264                                                | 0.593915062 | 0.846233974 | 1           | 1.079426758 |             |
| 1.28834325  | 0.909204425                                                | 0.657220847 | 1.25630892  | 1           | 1.116563057 |             |
| 1.354982141 | 0.982057609                                                | 1.313829076 | 1.286688308 | 1.263525396 |             |             |
| YGL258W     | YGL258W::VEL1::Increased in velum formation in flor strain |             |             | 1           |             |             |
| 0.828029552 | 0.864135274                                                | 0.836386092 | 0.907135419 | 1           | 0.790982347 |             |
| 0.803169008 | 0.87038932                                                 | 1.018892155 | 1           | 0.868586222 | 0.931924054 |             |
| 1.493255538 | 0.870773888                                                | 1           | 0.988526794 | 0.430452711 | 0.474241806 |             |
| 0.484624976 | 1                                                          | 1.241121245 | 1.253533555 | 0.899889479 | 0.58695944  | 1           |
| 1.290482307 | 1.334531889                                                | 1.454473225 | 0.993584147 | 1.269940268 | 1           |             |
| 0.894232883 | 1.055810509                                                | 1.104936345 | 0.889124786 | 1.994268354 | 1           |             |
| 1.226060858 | 0.764481586                                                |             | 1.733629175 | 1.215366122 |             |             |
| YNL179C     | YNL179C::YNL179C::molecular_function unknown               |             |             | 1           | 1.102963285 |             |
| 1.229226594 | 1.170830449                                                | 1.05777684  | 1           | 1.201758846 | 1.06213341  |             |
| 1.141185264 | 1.107138181                                                | 1           | 1.227557229 | 0.943951591 | 0.842624594 |             |
| 1.015312173 | 1                                                          | 1.395396544 |             | 1.070469024 | 1.430546744 |             |
| 0.707813513 | 0.731315208                                                | 0.846867859 | 0.567483964 | 1           | 0.793102243 |             |
| 0.959835686 | 0.770085971                                                | 0.79308359  | 1.058859628 | 1           | 0.785777307 |             |
| 1.155081701 |                                                            | 1.151102226 | 1.021525144 | 1           | 1.058668323 | 1.026149746 |
| 1.211707334 | 0.661798274                                                | 1.200530292 | 1.426391451 |             |             |             |
| YGR009C     | YGR009C::SEC9::Putative t-SNARE of the plasma membrane     |             |             |             | 1           |             |
| 0.540329411 | 0.812095343                                                | 0.881800674 | 0.850646991 | 1           | 0.826799129 |             |
| 0.814695487 | 0.924834657                                                | 0.736787551 | 1           | 0.990091499 | 1.01072779  |             |
| 0.676308527 | 0.961180655                                                | 1           | 1.087317562 | 1.04192299  | 0.915506882 |             |
| 1.105556657 | 1                                                          | 1.948726614 | 1.934264793 | 1.466044827 | 1.41163602  | 1           |
| 1.091676601 | 1.26679238                                                 | 0.833603485 | 0.653157374 | 0.983837714 | 1           |             |
| 1.156318503 | 1.104340503                                                | 1.092309526 | 1.000505917 | 1.04913867  | 1           |             |
| 1.311501915 | 1.190611543                                                | 1.173909831 | 0.667622055 | 1.155068287 | 1.04199261  |             |
| YNL181W     | YNL181W::YNL181W::molecular_function unknown               |             |             | 1           | 1.232937212 |             |
| 1.228323339 | 1.558199704                                                | 1.329342462 | 1           | 1.368840934 | 1.259773503 |             |
| 1.590532151 | 1.531530002                                                | 1           | 0.985142872 | 1.134562533 | 1.361103188 |             |
| 1.602806738 | 1                                                          | 1.339883022 | 1.745391109 | 1.695786624 | 0.784862116 | 1           |
| 0.660861621 | 0.423023312                                                | 0.339658108 | 0.654046703 | 1           | 0.872513498 |             |

|                                  |                                      |                                        |             |             |             |
|----------------------------------|--------------------------------------|----------------------------------------|-------------|-------------|-------------|
| 0.899259318                      | 0.592449418                          | 0.778859143                            | 1.009143919 | 1           | 1.22095034  |
| 0.987936004                      | 0.600672269                          | 0.822038358                            | 1.06906045  | 1           | 0.988591926 |
| 0.937076558                      | 0.895887154                          | 1.077582213                            | 1.208117292 | 0.865992156 |             |
| YGR011W                          | YGR011W::YGR011W::molecular_function | unknown                                |             | 1           | 1.087525184 |
| 1.049100039                      | 0.908148331                          | 1.226843958                            | 1           | 0.888419631 | 0.814054628 |
| 1.180017606                      | 1.183912923                          | 1                                      | 1.248004768 | 1.158381878 | 1.478762126 |
| 1.021791205                      | 1                                    | 1.300898245                            | 0.897809336 | 1.051150709 | 1.438462762 |
| 1.75556401                       | 2.214419324                          | 1.824439532                            | 1.197313253 | 1           | 1.400901617 |
| 1.83803778                       | 0.923616375                          | 0.561113268                            | 0.851823097 | 1           | 1.385883252 |
| 3.090356827                      | 2.195233509                          | 0.81513965                             | 1.403983382 | 1           | 1.918015881 |
| 2.950898949                      | 1.277662928                          | 1.181230232                            | 1.578127948 | 1.469297049 |             |
| YNL183C                          | YNL183C::NPR1::protein_kinase        | homolog                                |             | 1           | 1.168243811 |
| 1.219698437                      | 1.518785567                          | 1.210088563                            | 1           | 1.325700982 | 1.464260235 |
| 1.218740942                      | 1.085036696                          | 1                                      | 1.510011884 | 1.24478852  | 1.104316894 |
| 1.196544254                      | 1                                    | 1.066549519                            | 1.255310831 | 1.119528775 | 0.744830127 |
| 0.958228561                      | 0.966485288                          | 0.603934814                            | 0.596548346 | 1           | 1.040822858 |
| 1.198592156                      | 1.142245027                          | 1.096150527                            | 0.860641133 | 1           | 1.072861778 |
| 0.785735268                      | 0.925374014                          | 0.740937366                            | 0.546087872 | 1           | 1.11916427  |
| 0.966369366                      | 0.882383883                          | 0.817309414                            | 1.23418424  | 0.819584055 |             |
| YNL197C                          | YNL197C::WHI3::Protein               | involved in regulation of cell size    |             | 1           |             |
| 1.363659396                      | 0.916895032                          | 1.370065824                            | 0.936800097 | 1           | 1.46439318  |
| 1.396535199                      | 0.865652056                          | 0.764356429                            | 1           | 1.424555517 | 1.134179969 |
| 0.530733669                      | 0.971296067                          | 1                                      | 1.053720158 | 1.082797051 | 0.846982494 |
| 0.425417735                      | 1                                    | 0.387819764                            | 0.3813561   | 0.362157707 | 1           |
| 0.918698232                      | 0.831867815                          | 0.755159745                            | 0.955129808 | 0.600294225 | 1           |
| 0.660856261                      | 0.597636736                          | 0.518627665                            | 0.613907849 | 0.367403238 | 1           |
| 0.926836587                      | 0.721373584                          | 1.046280484                            | 0.726954018 | 0.995547401 | 0.651464271 |
| YNL199C                          | YNL199C::GCR2::activates             | transcription of glycolytic genes;     |             |             |             |
| homologous to GCR1; may function | in complex with Gcr1p                |                                        |             | 1           | 0.832376596 |
| 1.052647972                      | 1.201108142                          | 1.161905493                            | 1           | 0.941647405 | 1.107787437 |
| 1.150805564                      | 1.040911377                          | 1                                      | 0.718759162 | 0.894377966 | 0.691548478 |
| 1.135156566                      | 1                                    |                                        | 0.984662026 | 0.9103786   |             |
| 1                                | 0.946397921                          | 1.030703724                            | 0.995596878 | 0.936254376 | 1.274883798 |
| 0.86521336                       | 0.869895014                          | 0.822076752                            | 0.961585122 | 0.946280314 | 1           |
| 0.919369538                      | 0.901987397                          | 1.179034351                            | 1.281308586 | 1.234034022 | 0.979823219 |
| YNL201C                          | YNL201C::PSY2::Platinum              | Sensitivity                            |             | 1           | 1.622408297 |
| 1.716164097                      | 1.450191748                          | 1                                      | 1.61886575  | 1.502471182 | 1.513940252 |
| 1.564329283                      | 1                                    | 1.117689374                            | 1.393703366 | 1.295447042 | 1.729476358 |
| 1.031713623                      |                                      |                                        | 0.428413457 |             | 1           |
| 1.070108741                      | 1.255499183                          |                                        | 1.219478294 | 1.14752142  | 1           |
| 1.289926821                      | 0.945070995                          | 0.884595684                            | 1.152220011 | 1           | 0.87176442  |
| 1.053828332                      | 0.847142321                          | 1.188714286                            | 0.967370259 |             |             |
| YDR245W                          | YDR245W::MNN10::Required             | for mannan synthesis and for polarized |             |             |             |
| growth and bud emergence         |                                      |                                        | 1           | 0.928656401 | 0.852698304 |
| 1.09550734                       | 1                                    | 0.820623776                            | 0.797439089 | 1.045128392 | 1.084418034 |
| 0.665801373                      | 0.639929863                          | 0.546459018                            | 0.940552326 | 1           | 1.170427763 |
| 0.678107304                      | 0.77358164                           | 0.861378124                            | 1           | 0.959685447 | 0.528865775 |
| 0.589961263                      | 0.796874107                          | 1                                      | 1.066211137 | 0.973926952 | 1.223817052 |
| 1.186580058                      | 1.25232605                           | 1                                      | 1.00969064  | 1.142062809 | 0.762927947 |
| 0.791938581                      | 0.8062282                            | 1                                      | 0.834703053 | 0.961117749 | 0.889919899 |
| 1.156210814                      |                                      | 1.239007927                            |             |             |             |
| YDR247W                          | YDR247W::YDR247W::not                | yet annotated                          |             | 1           | 1.118323815 |
| 1.101094264                      | 0.835788012                          | 1                                      | 0.980424554 | 1.15889111  | 0.95295106  |
| 1.00116096                       | 1                                    |                                        | 1.342902989 | 2.594314399 | 0.974388587 |
| 1.500425756                      |                                      | 2.050985456                            | 0.783034211 | 1           | 1.022492941 |
| 0.960381382                      | 0.367111454                          | 1                                      | 1.055851133 | 0.956544101 | 1.227809695 |



1 0.956332403 1.018406456 0.796963652 1.040334794 0.847491854 1  
1.230647627 1.911203995 1.234946561 1.17860116 1.427403248 1.008718805  
YER007CA YER007CA::YER007C-A::molecular\_function unknown 1 1.107689107  
1.240926655 0.86930092 1.51494734 1 0.900938127 0.910864451  
1.290082223 1.250733586 1 1.028072833 1.14080654 1.032517354  
1.175497545 1 1.349261507 0.679432813 0.770019304 0.947478878 1  
1.362025339 0.772785171 0.803626686 0.855180681 1 1.241591621  
1.430964196 0.960025979 0.957265136 0.920446824 1 1.153500216  
1.796341224 1.345645212 1.215270265 1.68684184 1 1.197640666  
1.605161551 1.087589342 1.376725244 1.17686953 1.301177213  
YHR143WA YHR143WA::RPC10::subunit of RNA polymerase II 1 0.956116107  
1.191422361 0.81306838 1.542766607 1 0.752121327 0.748447712  
1.44679917 1.39918425 1 0.609615053 0.751299527 0.877868536  
1.328291388 1 0.429468243 0.29961383 0.256506664 0.889637584 1  
1.013078974 1.030335016 0.827421888 1 1.51271686 1.29359071  
1.494191942 1.462382857 1.294866601 1 1.151835496 0.971563289  
0.823429229 0.778548345 0.469247499 1 0.98201647 0.709836588  
0.991450781 0.772924473 0.647620177 0.513991299  
YML010WB YML010WB 1 1.626998537 1.749677567 1.015596505 1.502810112 1  
1.194352082 1.26101193 1.750802633 1.453157896 1 1.113912006  
1.229487837 1.93700272 1.023156485 1 0.830629719 0.504414137  
0.818478582 1 1.122158291 1.678487834 1.602240234 0.790663278 1  
0.768579015 0.737765419 0.565266404 0.684155539 0.646866985 1  
0.964601922 1.483203035 0.997220468 0.883316484 2.329745845 1  
1.183960362 1.517613084 1.047646327 2.076956034 1.316374644 1.182092421  
YML039W YML039W 1 1.256869556 1.000364828 1.640892325 0.923397853 1  
1.419444283 1.325867184 1.206830754 0.897670715 1 1.573932806  
1.570574174 0.714084292 1.45140716 1 1.031537093 1.548501736  
1.139385916 0.644039003 1 0.343674244 0.271888964 0.293336996  
0.741130051 1 0.960148929 0.932021644 1.472032619 1.382968281  
0.841613336 1 0.869217798 1.1217657 2.280783508 3.872228232  
1.542856806 1 1.134181558 1.509725742 3.18038256 1.421160088  
1.17253625 0.853733421  
YMR244CA YMR244CA::YMR244C-A::molecular\_function unknown 1 1.112886224  
1.667441039 1.216241347 2.409933562 1 1.050195895 1.181405058  
2.137696275 1.938834272 1 1.16081091 1.379879098 2.341471874  
1.745921252 1 1.31600368 0.940365236 1.298615102 1.265418862 1  
1.923000812 2.287023452 2.590939211 1.050037331 1 0.843431363  
1.049282662 0.693519298 0.654663547 0.914276535 1 1.361189595  
2.122467202 1 1.25242953 1.430266518 1.282239697  
1.900152063 1.995035829 0.920280823  
YPR156C YPR156C::TPO3::Polyamine transport protein 1 1.01823539  
0.654166097 0.9499713 0.736693079 1 1.022442519 0.989298914  
0.66439296 0.853712015 1 0.750624555 0.629968178 0.563785227  
0.708840387 1 1.167771999 1.021268649 1.108937437 0.630233544 1  
0.686881607 0.916248489 0.700105092 0.329526183 1 1.017725586  
0.87023081 1.500744207 1.538179647 1.006325783 1 0.781592056  
0.50951643 0.645534622 0.673825476 0.445173318 1 0.775253559  
0.581955101 0.454696962 0.703502588 0.523801614 0.648837381  
YPR158W YPR158W::YPR158W::molecular\_function unknown 1 0.996972987  
1.658384383 1.090550538 1.303103278 1 1.0798443 1.227586022  
1.414193126 0.965237715 1 1.017614681 2.078797281 2.150426729  
0.921198732 1 0.817943439 0.876032533 1.327704798 2.128337812 1  
1.845087281 4.619958266 5.48110953 2.331114531 1 2.054388678  
1.774427801 1.1155313 0.820327073 1.247632828 1 2.61495121  
0.731261519 0.580840929 0.846096008 1.935489159 1 2.801452052  
0.771261898 0.820772415 1.128701007 1.350630328 1.140062488

YPR160W YPR160W::GPH1::Releases glucose-1-phosphate from glycogen 1  
1.939816261 1.692996999 1.608457745 1 1  
1.500956075 1 1.204562363  
0.436562625 0.876488456 0.757490036 1.279072749  
1.098505831 1.089877264 1 0.870962431 0.881749575 1.180724773  
1.532544842 1.112415895 1 0.93806101 0.779183193 0.968252107  
1.224932515 1.972053859 1.850193439  
YJL148W "YJL148W::RPA34::RNA polymerase I subunit, not shared (A34.5)" 1  
0.712952558 0.664393133 0.748552054 1.005913794 1 0.59951105  
0.555896193 0.87928881 0.983082935 1 0.47125979 0.342478473  
0.368144082 0.771049755 1 0.273785997 0.676277307 1  
0.496460478 0.597785479 0.337676567 0.359297472 1 0.567318769  
0.502415517 0.469068676 0.568457981 1 0.787348331 0.687967703  
0.500288449 0.901586221 1.569437532 1 0.756470797 0.683739671  
1.268301871 0.694683276 0.946549518  
YJL150W YJL150W::YJL150W::molecular\_function unknown 1 1.686178264  
1.503642431 1.4536351 1.650531956 1 1.474423512  
1.675802659 1 1.500022512 1.405512843 1.432146551 1.223009477  
0.901863787 0.506751711 1 1  
1.056875882 0.712557912 1.001384818 0.702802361 0.473730073 1  
0.99460962 0.96906848 0.894381385 0.895444202 0.620300404 1  
1.232957338 1.096229448 1.241924241  
YJL152W YJL152W::YJL152W::molecular\_function unknown 1 1.253963169  
1.961272823 0.936913249 1.736236038 1 1.395423966 1.240475337  
1.768457901 1.643475747 1 1.35960339 1.670968341 3.665081169  
1.523898455 1 1.60399876 1.409058153 1.703092067 2.882869763 1  
2.449917632 4.313318943 3.461477879 1.760265095 1 1.248627388  
1.275716964 0.978953316 1.004774177 1.021307791 1 1.105402574  
1.264904778 1.500750797 1.774714719 1 1.231577176 1.383331427  
1.1599163 1.883521357 1.114135997 1.179465531  
YGR013W "YGR013W::SNU71::associated with U1 snRNP (no counterpart in  
mammalian U1 snRNP; contains few SR-, RE- and RD-dipeptides)" 1  
0.771376469 0.923516811 0.948588204 0.965954237 1 0.900714781  
0.929909794 0.860048068 0.847378717 1 1.040641187 1.070344973  
0.725982294 1.147413585 1 0.825564036 0.676186737 0.798824772 1  
1.419886334 1.852070334 1.218932068 1.43685663 1 0.865912115  
1.198110772 1.046659429 0.780094521 0.950395169 1 1.285263062  
1.285010862 1.243057709 1.381589747 0.887945557 1 1.510731723  
1.461084092 1.673067393 1.196398489 1.695121697 0.867743381  
YJL154C YJL154C::VPS35::Protein involved in vacuolar sorting 1  
1.149306401 1.121258112 1.127601204 1.123035452 1 1.252625867  
1.167611608 1.080094782 1.121313044 1 1.173334712 1.201346709  
1.092090081 1.21098877 1 0.885123539 0.732688463 0.647825593  
0.851314069 1 1.266796384 1.195818498 1.197120459 0.904226048 1  
1.023511184 1.3821294 1.561943707 0.97947488 1.307176655 1  
1.471175981 1.620082937 1.78459016 0.962917283 0.708145944 1  
1.065564344 1.011943848 0.761410815 0.958534961 0.797123275 3.435073037  
YGR015C YGR015C::YGR015C::molecular\_function unknown 1.137709219  
1.081877086 0.960368595 0.946789302 1.005019554  
1.106450226 1.120032152 1.147622985 1.256208506 1.167933837 1  
1.054744275 1.050451001 1.433216195 1.172504453 0.440055116  
0.585946744 0.704462834 1 1.033689861 0.918851699 1.085149091  
1.110714528 0.884799469 1 0.84958849 0.875403346 0.835596085  
0.901275152 1.05167567 1 0.913340889 0.947107783 1.045059558  
0.564457321 0.967797057 0.938668951  
YJL156C YJL156C::SSY5::Product of gene unknown 1 0.993449826  
1.083553242 1.534345862 1.109328438 1 1.314060299 1.549238419

|             |                                                                                                |             |             |             |             |             |
|-------------|------------------------------------------------------------------------------------------------|-------------|-------------|-------------|-------------|-------------|
| 0.97876998  | 1.004136976                                                                                    | 1           | 0.990043671 | 1.237755963 | 0.864622973 |             |
| 1.352753032 | 1                                                                                              | 0.738618484 | 0.535107992 | 0.556639055 | 0.62338052  | 1           |
| 0.957703695 | 0.829649909                                                                                    | 0.644515997 | 1           |             | 1.151865441 | 1.145078222 |
| 1.232098967 | 1.18229496                                                                                     | 1           | 0.945852739 | 0.509053788 | 0.887772173 |             |
| 0.964394048 | 0.400292189                                                                                    | 1           | 0.826328218 | 0.692872509 | 1.027997429 |             |
| 0.759223459 | 0.779951769                                                                                    | 2.505160317 |             |             |             |             |
| YGR017W     | YGR017W::YGR017W::molecular_function                                                           | unknown     | 1           |             | 1.344523494 |             |
| 1.422892476 |                                                                                                | 1.279892114 | 1           | 1.135004771 | 1.209186715 |             |
| 1.386108293 | 1                                                                                              | 1.314717962 | 1.389131965 | 1.39061694  | 1.591171094 |             |
|             |                                                                                                |             |             | 1           | 1.136836655 |             |
| 1.219044737 | 1.069500606                                                                                    | 0.816385967 | 1.112183536 | 1           | 1.314055395 |             |
| 1.626161115 | 1.501417815                                                                                    | 1.043052065 | 1.215206258 | 1           | 1.46890815  |             |
| 1.700200631 | 1.098805347                                                                                    | 1.192577382 | 1.810255696 | 1.12430125  |             |             |
| YJL170C     | YJL170C::ASG7::an a-specific gene that is induced to a higher expression level by alpha factor | 1           | 1.519436199 | 1.775454789 | 1.517988698 |             |
| 1.993564133 | 1                                                                                              | 1.684667046 |             | 2.118348708 | 1           |             |
| 1.471759944 | 1.782270878                                                                                    | 1.695309943 | 1           | 1.703557264 | 1.462230198 |             |
| 2.161124923 | 1                                                                                              | 1.821088756 | 3.233604977 | 2.78616579  | 1.537981322 | 1           |
| 1.267812802 | 1.199268615                                                                                    | 1.158466761 | 1.056853673 | 1.308060565 | 1           |             |
| 0.788036617 | 0.887274693                                                                                    | 1.052142306 |             | 0.894977799 | 1           | 1.139341419 |
| 1.192059797 |                                                                                                | 0.924855302 | 1.36814578  | 0.373015823 |             |             |
| YJL172W     | YJL172W::CPS1::carboxypeptidase yscS                                                           |             | 1           |             | 0.851405717 |             |
| 0.831871572 | 1.427169856                                                                                    | 0.711713628 | 1           | 1.033373241 | 1.217302054 |             |
| 0.950635553 | 0.97593003                                                                                     | 1           | 1.199308864 | 1.313378957 | 1.067255136 |             |
| 1.116369813 | 1                                                                                              | 0.878310945 | 0.761898822 | 0.932478066 | 0.537020072 | 1           |
| 0.466446863 | 0.451211238                                                                                    | 0.462827677 | 0.388408689 | 1           |             | 1.161587328 |
| 1.471168826 | 1.025345594                                                                                    | 0.619661637 | 1           | 1.343146552 | 0.650530775 |             |
| 1.861552193 | 2.162626357                                                                                    | 0.324374842 | 1           | 0.715464634 | 0.651098997 |             |
| 1.232563617 | 0.482886055                                                                                    | 0.488907958 | 0.988579451 |             |             |             |
| YGR019W     | YGR019W::UGA1::gamma-aminobutyrate (GABA) transaminase (4-aminobutyrate aminotransferase)      | 1           | 0.763110227 | 0.919932118 |             |             |
| 0.705024358 | 1                                                                                              | 0.901768228 | 1.083770392 | 0.827224954 | 0.888916906 | 1           |
| 1.047634803 | 1.612293627                                                                                    | 1.815394437 | 0.979369425 | 1           | 2.148459535 |             |
| 1.181207831 |                                                                                                | 2.292550097 | 1           | 2.041431976 | 2.074955562 | 3.429683784 |
| 2.507405197 | 1                                                                                              | 1.128805119 | 1.924523644 | 2.219203868 | 1.183294293 |             |
| 1.201023318 | 1                                                                                              | 1.155265892 | 2.398693777 | 3.496058863 | 2.223678619 |             |
| 1.570560286 | 1                                                                                              | 1.617591244 | 2.089699032 | 1.715053461 | 1.103105023 |             |
| 2.189923073 | 1.281037964                                                                                    |             |             |             |             |             |
| YJL174W     | YJL174W::KRE9::cell wall beta-glucan assembly                                                  | 1           |             |             | 1.597495682 |             |
| 1.436482172 | 1.354998094                                                                                    | 1.578846346 | 1           | 1.652635603 | 1.403620226 |             |
| 1.289291071 | 1.421478916                                                                                    | 1           | 1.37592575  | 1.412010381 | 1.459967628 |             |
| 1.321612518 | 1                                                                                              | 1.018058058 | 0.678857957 | 0.844456156 | 1.207664698 | 1           |
| 1.053072873 | 0.944982767                                                                                    | 1.084459826 | 1.089226726 | 1           | 1.295728867 |             |
| 1.139973606 | 1.076311037                                                                                    | 1.465327647 | 1.245107898 | 1           | 1.094820822 |             |
| 1.088386082 | 1.053230436                                                                                    | 0.876559786 | 0.735902638 | 1           | 1.146750179 |             |
| 0.957017686 | 1.004705799                                                                                    | 1.2619981   | 0.814864128 | 1.436899012 |             |             |
| YGR033C     | YGR033C::YGR033C::molecular_function                                                           | unknown     | 1           |             | 0.841924393 |             |
| 0.808292885 | 0.82167792                                                                                     | 0.819417202 | 1           | 0.782296008 | 0.731360427 |             |
| 0.881053889 | 0.928273525                                                                                    | 1           | 0.726061298 | 0.770636006 | 0.793801134 |             |
| 1.050173913 | 1                                                                                              | 0.964834541 | 0.880748149 | 0.911960136 | 1.115412511 | 1           |
| 1.28502682  | 1.446078624                                                                                    | 1.492728087 | 1           | 0.855575968 | 0.932658889 |             |
| 1.081765604 | 1.078975446                                                                                    | 1.039119004 | 1           | 0.862812123 | 0.725995525 |             |
| 0.78033641  | 0.821771654                                                                                    | 0.899317508 | 1           | 0.937252609 | 0.805493424 |             |
| 1.006994356 | 0.855867442                                                                                    | 0.973688228 | 1.01309692  |             |             |             |
| YJL176C     | YJL176C::SWI3::transcription factor                                                            | 1           |             | 0.779263704 | 0.89537889  |             |
| 0.97575389  | 0.941389526                                                                                    | 1           | 1.002179958 | 1.025509211 | 0.84305094  |             |
| 0.857643945 | 1                                                                                              | 0.87334423  | 0.871940569 | 0.593040859 | 0.968780108 | 1           |

|             |                                                                                                                                                       |             |             |             |             |
|-------------|-------------------------------------------------------------------------------------------------------------------------------------------------------|-------------|-------------|-------------|-------------|
| 0.672014664 | 0.50521926                                                                                                                                            | 0.684597049 | 0.632164643 | 1           | 0.904688467 |
| 0.59488003  | 0.772571409                                                                                                                                           | 0.704825595 | 1           | 0.870511106 | 0.917081284 |
| 0.869534341 | 0.808480417                                                                                                                                           | 1.055036491 | 1           | 1.139702005 | 0.930118449 |
| 1.06224216  | 1.159201039                                                                                                                                           | 0.763254511 | 1           | 0.973926334 | 0.845182973 |
| 1.107924669 | 0.88230216                                                                                                                                            | 0.845343801 | 1.774889805 |             |             |
| YGR035C     | YGR035C::YGR035C::molecular_function                                                                                                                  | unknown     | 1           | 0.96748997  |             |
| 1.169095471 | 1.060407228                                                                                                                                           | 1           | 0.861308066 | 0.893534421 | 1.238155911 |
| 1.091829578 | 1                                                                                                                                                     | 1.295221481 | 1.386351309 | 1.727473498 | 1.074553469 |
| 1.613053155 | 3.434419891                                                                                                                                           | 1.769283637 | 1           | 1.317515835 |             |
| 1.180032799 | 1.281778319                                                                                                                                           | 1           | 0.869077075 | 1.087096028 | 0.56880923  |
| 0.790934789 | 1                                                                                                                                                     | 0.956452541 | 1.865786958 | 2.4443975   | 1.93050412  |
| 2.330526727 | 1                                                                                                                                                     | 1.635147905 | 1.824569766 | 1.249116892 | 0.737531368 |
| 2.390018358 | 0.832718402                                                                                                                                           |             |             |             |             |
| YJL178C     | YJL178C::YJL178C::molecular_function                                                                                                                  | unknown     | 1           | 0.865775707 |             |
| 1.067675149 | 0.967488504                                                                                                                                           | 0.977087381 | 1           | 0.968376137 | 0.878518477 |
| 1.132220369 | 1.159203059                                                                                                                                           | 1           | 0.899542552 | 0.955487062 | 1.104694493 |
| 0.969458851 | 1                                                                                                                                                     | 0.813463987 | 0.58408225  | 0.551976294 | 0.798039536 |
| 1.435600716 | 0.86661952                                                                                                                                            | 1.297582086 | 1.036585054 | 1           | 0.949863247 |
| 1.032400197 | 1.624467478                                                                                                                                           | 1.303022464 | 1.137552625 | 1           | 0.888683248 |
| 1.03559543  | 0.93152136                                                                                                                                            | 0.820338226 | 0.761863193 | 1           | 0.859190906 |
| 0.808262496 | 0.908421706                                                                                                                                           | 0.966588519 | 0.659570603 | 1.063007524 |             |
| YGR037C     | YGR037C::ACB1::Involved in transport of newly synthesized acyl-CoA esters from the fatty acid synthetase to acyl-CoA-consuming processes              |             |             |             |             |
| 0.714146439 | 0.799450261                                                                                                                                           | 0.652997254 | 1.161057224 | 0.607785425 |             |
| 0.631569637 | 1.097083452                                                                                                                                           | 1.185747903 | 0.76919323  | 0.789056873 |             |
| 1.377739337 | 0.959409239                                                                                                                                           | 1           | 1.140610658 | 0.755590864 | 0.884092816 |
| 1.471861268 | 1                                                                                                                                                     | 1.377194324 | 1.472882597 | 1.592486955 | 1.489990029 |
| 1.369698188 | 1.598539758                                                                                                                                           | 1.528760078 | 1.469161958 | 1           | 1.317941931 |
| 3.05810618  | 2.784758636                                                                                                                                           | 1.730709402 | 2.105008352 | 1           | 0.896024481 |
| 1.240007391 | 1.082752755                                                                                                                                           | 0.942401227 | 0.956873301 | 1.361595274 |             |
| YGR039W     | YGR039W::YGR039W::molecular_function                                                                                                                  | unknown     | 1           |             |             |
| 0.987521903 | 1.313901917                                                                                                                                           | 1           | 1.132453095 | 1.225353224 |             |
| 1.217773046 | 1                                                                                                                                                     | 1.180546883 | 1.191581181 | 0.937888175 | 1.175620473 |
| 1.257759651 | 1.250956821                                                                                                                                           | 0.564621012 |             |             |             |
| 0.478338957 | 1                                                                                                                                                     | 0.945586283 | 1.023570323 | 0.796175825 | 1.021109189 |
| 1.016560806 | 0.845833061                                                                                                                                           | 1.122034741 | 1.628498978 | 1.728985444 | 1           |
| 0.906625143 | 1.021853256                                                                                                                                           |             |             |             |             |
| YGR041W     | YGR041W::BUD9::among a group of genes whose products are necessary for bud-site selection; likely involvement in positioning the proximal pole signal |             |             |             |             |
| 1           | 0.900903034                                                                                                                                           | 0.715412982 | 1.236477594 | 0.741611344 | 1           |
| 0.97757841  | 1.149679796                                                                                                                                           | 0.976800287 | 0.931747865 | 1           | 0.980146543 |
| 0.853055559 | 0.69739585                                                                                                                                            | 0.820311269 | 1           | 0.795946317 | 1.121365097 |
| 0.649005231 | 1                                                                                                                                                     | 0.791994557 | 0.446013883 | 0.574221032 | 1           |
| 0.86992035  | 0.834940428                                                                                                                                           | 1.283815116 | 0.941879013 | 0.880331625 | 1           |
| 0.667178795 | 0.744540496                                                                                                                                           | 1.010940156 | 0.435596242 | 0.646903923 | 1           |
| 0.776631821 | 0.881124626                                                                                                                                           | 0.926216497 | 0.472939791 | 0.706755368 | 0.969315762 |
| YGR043C     | YGR043C::YGR043C::transaldolase                                                                                                                       |             | 1           | 1.102597265 | 1.278383147 |
| 2.521083353 | 2.551679536                                                                                                                                           | 1           | 1.134524317 | 1.661552707 | 3.24591887  |
| 5.309881298 | 1                                                                                                                                                     | 0.790438722 | 1.782705858 | 9.563637763 | 9.580734693 |
| 3.099105191 | 19.82496359                                                                                                                                           | 23.41716264 | 0.21187839  | 0.514380749 |             |
| 1.791870584 | 1.724194487                                                                                                                                           | 1           | 1.259835215 | 1.143157057 |             |
| 1.104159866 | 1                                                                                                                                                     | 1.199710902 | 1.561369244 | 1.18619365  | 0.960535128 |
| 1.969887987 | 1                                                                                                                                                     | 1.025796623 | 1.605345225 | 0.990853518 | 1.302291499 |
| 1.017055205 | 1.183843646                                                                                                                                           |             |             |             |             |
| YHR049CA    | YHR049CA::YHR049C-A::molecular_function                                                                                                               | unknown     | 1           | 1.072750141 |             |
| 1.080291225 | 1.019425464                                                                                                                                           | 1.078966933 | 1           | 0.966935083 | 0.888977018 |
| 1.032948841 | 1.032301745                                                                                                                                           | 1           | 1.298648269 | 1.183383599 | 0.972206749 |

|             |                                                                                            |             |             |             |             |               |
|-------------|--------------------------------------------------------------------------------------------|-------------|-------------|-------------|-------------|---------------|
| 1.053354231 | 1                                                                                          | 0.998966786 | 4.414466343 | 1.038094926 | 0.88726142  | 1             |
| 0.754313858 | 0.957251043                                                                                | 0.70868973  | 0.821801033 | 1           | 1.16414939  |               |
| 0.997991279 | 1.76577679                                                                                 | 1.290276031 | 1.226978175 | 1           | 1.053010057 |               |
| 1.152164358 | 1.21022938                                                                                 | 1.162734201 | 0.860512979 | 1           | 1.111231473 |               |
| 1.045281645 | 1.048720927                                                                                | 0.84135578  | 1.141813714 |             |             |               |
| YHR079CB    | YHR079CB                                                                                   | 1           | 0.958174241 | 0.719619139 | 0.97853237  | 0.699114634 1 |
| 0.915974822 | 0.99641485                                                                                 | 0.665216196 | 0.700356413 | 1           | 1.07283613  |               |
| 0.89085666  | 0.499695795                                                                                | 1           | 0.780636165 | 0.309563427 | 0.846594562 |               |
| 0.449368471 |                                                                                            |             | 1           | 0.847522464 | 0.673198257 |               |
| 0.915509343 | 1.055580692                                                                                | 0.877789684 |             | 0.792274983 | 1.068548854 |               |
| 0.707846132 | 0.890455464                                                                                | 0.912342827 | 1           | 0.825115272 | 1.295658543 |               |
| 0.993114239 | 1.232541191                                                                                | 1.03530275  | 0.842350299 |             |             |               |
| YMR120C     | YMR120C::ADE17::AICAR transformylase/IMP cyclohydrolase                                    |             |             |             |             | 1             |
| 0.731330557 | 0.47121578                                                                                 | 0.62668889  | 0.430049739 | 1           | 0.923754745 |               |
| 0.75572248  | 0.475357089                                                                                | 0.419824242 | 1           | 1.570597689 | 1.695819745 |               |
| 0.416446212 | 0.397277297                                                                                | 1           | 3.982210195 |             | 1.064197275 | 1             |
| 2.07597579  | 0.795538114                                                                                | 0.376290843 | 0.323943111 | 1           | 1.353403804 |               |
| 1.662506249 | 1.210126239                                                                                | 2.037658169 | 2.513753751 | 1           | 0.797371676 |               |
| 0.777628055 | 0.526421137                                                                                | 0.875940851 | 2.851743552 | 1           | 0.878672234 |               |
| 0.855538982 | 0.6399236                                                                                  | 1.886690264 | 5.423264232 | 0.773176006 |             |               |
| YMR153CA    | YMR153CA::YMR153C-A::molecular_function unknown                                            |             |             |             |             | 1             |
| 0.975750644 | 1.012652185                                                                                | 1           | 0.821198716 | 0.750185961 |             | 1             |
| 0.871271339 | 0.875287686                                                                                | 0.944940032 | 1.045041381 | 1           | 1.011578767 |               |
| 1.557583506 | 0.644008141                                                                                | 1.029020855 | 1           | 2.034958715 | 2.900290089 |               |
| 1.612838669 | 1.416431271                                                                                | 1           | 1.053193698 | 1.10409611  | 1.067025659 |               |
| 0.924332059 | 1.010571812                                                                                | 1           | 1.075545352 | 1.141874427 | 0.797282695 |               |
| 0.848982671 | 1.618998918                                                                                | 1           | 0.615521041 | 1.385496769 | 0.749108622 |               |
| 1.31315609  | 0.714201991                                                                                | 1.407127762 |             |             |             |               |
| YPR060C     | YPR060C::ARO7::chorismate mutase                                                           |             |             |             |             | 1             |
| 1.071758974 | 1                                                                                          | 0.80215434  | 0.730639379 |             | 0.984424942 | 1             |
| 0.801981656 | 0.73544279                                                                                 | 0.656224204 | 0.965990214 | 1           | 0.499324653 |               |
| 0.467516119 | 0.942287485                                                                                | 1           | 1.696667545 | 2.382203708 | 1.889573347 | 1             |
| 0.980838866 | 1.054384275                                                                                | 1.069325382 | 1.020207454 | 1.170746712 | 1           |               |
| 0.965106076 | 1.110898047                                                                                | 0.903685424 | 1.060092508 | 1.158880082 | 1           |               |
| 0.961836866 | 1.295559482                                                                                | 1.136031913 | 1.308498195 | 0.906563947 | 1.134808707 |               |
| YPR062W     | YPR062W::FCY1::cytosine deaminase highly homologous to Candida albicans cytosine deaminase |             |             |             |             | 1             |
| 1.28222808  | 1                                                                                          | 0.767271521 | 0.771608773 | 1.15367864  | 1.167975673 | 1             |
| 1.122465814 | 0.922088028                                                                                | 1.164608143 | 1.086498165 | 1           | 1.141161055 |               |
| 0.772943118 | 1.05420343                                                                                 | 1           | 1.576767707 | 1.579466716 | 1.269832532 |               |
| 0.907447878 | 1                                                                                          | 1.015530528 | 1.048730618 | 0.55209549  | 0.806179598 |               |
| 0.919995685 | 1                                                                                          | 1.045546271 | 1.08762597  | 0.696394427 | 0.759765492 |               |
| 1.722517207 | 1                                                                                          | 1.057223406 | 1.091742516 | 0.852468366 | 1.632268099 |               |
| 1.054642432 | 1.276659744                                                                                |             |             |             |             |               |
| YPR126C     | YPR126C::YPR126C::molecular_function unknown                                               |             |             |             |             | 1             |
| 1.096821434 | 0.881871086                                                                                | 1.178584079 | 1           | 0.751473509 | 0.851002954 |               |
| 1.191043719 | 1.393548998                                                                                | 1           | 0.837333687 | 0.869300274 | 1.450608877 |               |
| 1.148226212 | 1                                                                                          | 0.880054823 |             | 1.191795622 | 1.565689811 | 1             |
| 1.078755128 | 1.963023544                                                                                | 1.488795758 | 1.116083285 | 1           | 0.853999235 |               |
| 0.849762373 | 0.646477032                                                                                | 0.805151754 | 0.806408949 | 1           | 0.945017428 |               |
| 1.191262174 | 0.842413154                                                                                | 0.929611365 | 1.166533987 | 1           | 0.931980443 |               |
| 1.060613191 | 0.90894694                                                                                 | 1.238404291 | 0.947595205 | 1.114669354 |             |               |
| YPR064W     | YPR064W::YPR064W::molecular_function unknown                                               |             |             |             |             | 1             |
| 0.949774202 | 0.964959971                                                                                | 0.841913354 |             | 0.944367805 | 0.844655751 |               |
| 1.015142153 | 0.945598991                                                                                | 0.75723077  | 0.940808454 | 1           | 0.731247565 |               |
| 0.782457944 | 0.692004987                                                                                | 1           | 0.814079741 | 0.739367764 | 0.301975167 |               |
| 0.757389447 | 1                                                                                          | 1.063287515 | 1.209427799 | 1.080922261 | 0.960258405 |               |

0.915739743 1 1.126041138 1.100718541 1.098838904 1.055949298 1  
 1.004140853 1.403226129 1.173854078 0.987256961 1.007827514  
 YJL180C YJL180C::ATP12::essential for assembly of a functional F1-ATPase;  
 binds the alpha subunit of F1-ATPase. 1 0.836384766 1.082759289  
 1.046438059 1.257020528 1 1.023512705 1.117988713 1.32182827  
 1.189907208 1 0.749641706 0.811953002 1.006532747 0.969364023 1  
 0.997121761 0.95762534 0.866131308 1.428473386 1 1.217487374  
 1.032085177 0.903504514 0.860324985 1 1.116089935 1.317739528  
 1.130358232 1.028771155 1.239588386 1 1.217799428 1.080603586  
 1.150634205 0.785064873 1 1.203197083 1.034893761 0.850307171  
 0.982320081 1.096905486 0.926410164  
 YJL194W YJL194W::CDC6::Protein involved in initiation of DNA replication 1  
 1.094732705 1.123665535 1.434648353 1.254910811 1 1.334399226  
 1.073951429 1.431950039 1 0.860982339 1.000840408 0.999754342  
 1 1.148352455  
 1.136544654 1.323659723 1.324664452 1.286376834 1 1.030000038  
 1.175231585 1.096286933 0.939805329 1.021315555 1 0.91100224  
 1.053030629 0.850602965 1.129164621 0.968507937 0.535006265  
 YJL196C "YJL196C::ELO1::elongation enzyme 1, required for the elongation of  
 the saturated fatty acid tetradecanoic acid (14:0) to that of hexadecanoic acid  
 (16:0)" 1 1.438972259 1.254176803 1.332772751 1.589020822 1  
 1.274044268 1.159859601 1.334215276 1.247662166 1 1.078157957  
 1.290546252 1.155238158 1.008599092 1 1.277077256 1.096246798  
 1.088446167 1.258655013 1 0.56591601 0.558024945 0.504928171  
 0.611250559 1 1.230875451 1.539681022 1.313488241 1.077705503 1  
 0.744766759 1.388901625 1.037378553 0.418613642 0.80887486 1  
 0.897755631 1.220972557 0.738593146 1.365622649 0.831116387 1.269654842  
 YGR057C YGR057C::LST7::Required for amino acid permease transport from the  
 Golgi to the cell surface 1 0.878309043 0.72941501 0.951629208  
 0.99466079 1 0.701113034 0.730499838 0.967230894 0.979496128 1  
 0.725665335 0.630139601 0.640812191 1.002411846 1 0.843283368  
 0.734738464 1 0.8226029 0.880452615 1 0.846821419  
 1.012338582 0.932047063 0.891382254 1.258323648 1 1.288024116  
 1.066564899 1.314764644 1.61544549 1 1.214429892 1.086162739  
 1.197954014 1.042868171  
 YJL198W YJL198W::PHO90::Low-affinity phosphate transporter 1  
 0.964983737 0.686236894 0.936115934 0.691141793 1 0.907428298  
 0.854557242 0.665188904 0.755456672 1 0.936279809 0.458602129  
 0.260831832 0.744912498 1 0.376326275 0.247006204 0.230711846 1  
 0.43881633 0.27784315 1 0.955108245 0.68712374  
 0.951848409 1.435126408 0.957534502 1 0.768313033 0.453942093  
 0.612261206 0.775875793 0.653034637 1 0.515935335 0.414534883  
 0.740530002 0.696865178 0.446956178 0.509613183  
 YGR059W YGR059W::SPR3::a sporulation-specific homologue of the yeast  
 CDC3/10/11/12 family of bud neck microfilament genes; regulated by ABFI  
 1.021968189 0.934969555 0.969179319 0.883831463 0.790835071  
 1.08538676 1.105463413  
 0.569373792 0.590313743 0.92213892  
 0.946172225 1.003758752 1 0.995043037 1.172769509  
 1.104324499 1 1.428165327 0.810827823  
 YJL200C YJL200C::YJL200C::aconitase hydratase 1 1.036014799  
 0.777701208 1.081353991 0.587877719 1 1.113401941 1.036930624  
 0.585642582 0.641954013 1 0.839323761 0.508871719 0.240710395  
 0.865428377 1 0.684338417 1.280607069 1.757726499 0.835463236 1  
 0.507723491 0.542644523 0.695719435 1.130871698 1 0.456106727  
 0.307459949 0.371510966 1.539056937 1.086125796 1 0.345009512

|         |                                                               |                          |             |             |             |             |             |
|---------|---------------------------------------------------------------|--------------------------|-------------|-------------|-------------|-------------|-------------|
|         | 0.226106318                                                   | 0.200304161              | 0.382191281 | 0.599183702 | 1           | 0.261009786 |             |
|         | 0.180439671                                                   | 0.668861468              | 0.763260698 | 0.441714487 | 0.842350299 |             |             |
| YJL202C | YJL202C::YJL202C::molecular_function                          | unknown                  |             |             | 1           | 0.990181566 |             |
|         | 1.438266742                                                   | 1.098345958              | 1.595677515 | 1           | 1.024291056 |             |             |
|         | 1.487920375                                                   | 1                        | 1.03787422  | 1.345830781 | 1.504218378 | 1.110920778 | 1           |
|         | 0.841974821                                                   | 1.038633923              | 0.888322405 | 1.099299144 | 1           | 1.02722282  |             |
|         | 1.470798424                                                   | 1.213892832              | 0.925632765 | 1           | 0.6957185   | 0.955946071 |             |
|         | 0.539357418                                                   | 0.497093342              | 1.055360085 | 1           | 1.315287188 | 1.42804332  |             |
|         | 1.293540231                                                   | 1.169524123              | 1.597367242 | 1           | 0.736298364 | 0.909437625 |             |
|         | 0.934028274                                                   | 0.653822602              |             |             |             |             |             |
| YGR061C | YGR061C::ADE6::5'-phosphoribosylformyl                        | glycinamidine synthetase |             |             |             |             | 1           |
|         | 1.252350263                                                   | 0.834810417              |             | 1           | 1.196924748 | 1.268140765 |             |
|         | 0.727875787                                                   | 1                        | 1.708657482 | 1.36441696  | 0.423549599 | 1.021651297 | 1           |
|         | 1.086829395                                                   | 0.987858389              |             | 1           | 0.546156837 |             | 1           |
|         | 0.848278412                                                   |                          | 0.647919427 | 0.530294072 |             | 1.252319807 |             |
|         | 0.635527442                                                   |                          | 1           | 1.31571102  | 1.189183099 | 1.041663498 |             |
|         | 0.467085366                                                   | 15.27438527              |             |             |             |             |             |
| YGR061C | YGR061C::ADE6::5'-phosphoribosylformyl                        | glycinamidine synthetase |             |             |             |             |             |
|         |                                                               |                          |             |             |             |             | 1           |
|         | 0.916793337                                                   | 0.725575628              | 0.781320463 | 1.43460549  | 0.980455847 | 1           |             |
|         | 0.674032392                                                   | 0.404145173              | 0.44413297  | 0.670191747 | 0.63915627  | 1           |             |
|         | 0.62111912                                                    | 0.522362729              | 0.669480403 | 0.702183329 | 1.423935909 | 0.516618137 |             |
| YJL204C | YJL204C::RCY1::ReCYcling                                      | 1                        | 1           | 1.085569277 | 1.146916686 |             |             |
|         | 1.395074141                                                   | 1.033255602              | 1           | 1.23048633  | 1.235143637 | 0.795763721 | 1           |
|         | 1.104580397                                                   | 1.14437097               | 0.685950709 | 1.12905479  | 1           |             |             |
|         | 0.851290624                                                   | 1                        | 0.744463863 |             | 1           | 0.6978529   |             |
|         | 0.396966881                                                   | 0.456678105              | 0.868945593 | 1           |             | 1.687959332 | 0.972070061 |
|         | 1.306133555                                                   | 2.214924417              |             |             | 0.86647619  | 1.036433928 |             |
| YGR063C | "YGR063C::SPT4::Zn-finger protein, transcriptional regulator" |                          |             |             |             |             | 1           |
|         | 1.466822803                                                   | 1.36017982               |             | 1.628503627 | 1           | 1.107904498 | 0.930522377 |
|         | 1.701654825                                                   | 1                        | 1.22603034  | 1.266578958 | 1.617509151 | 1.382292546 | 1           |
|         | 1.216826617                                                   |                          | 0.919526945 | 0.928040549 | 1           | 1.225998392 | 1.111663802 |
|         | 0.934680212                                                   | 0.93290876               | 1           | 1.090415675 | 1.331739261 | 1.088114062 |             |
|         | 1.362896235                                                   | 0.855584492              | 1           | 0.867326742 | 1.252410273 | 1.000602004 |             |
|         | 0.855005863                                                   | 1.230723972              | 1           | 0.932482803 | 1.151300209 | 0.721014914 |             |
|         | 1.150019029                                                   | 0.783294665              | 1.128679366 |             |             |             |             |
| YJL218W | YJL218W::YJL218W::molecular_function                          | unknown                  |             |             | 1           | 1.154539321 |             |
|         | 1.616897546                                                   | 1.241781794              | 1.892862085 | 1           | 1.153377676 | 1.280093617 |             |
|         | 1.631458088                                                   | 1                        | 0.976144339 |             | 1.412400876 | 1.163735172 | 1           |
|         | 1.030265097                                                   | 0.988260124              | 1.281113127 | 1.170602588 | 1           | 0.768125304 |             |
|         | 0.968373584                                                   |                          | 0.866735577 | 1           | 1.223543229 | 1.587772899 | 1.468541201 |
|         | 0.92531507                                                    | 1.395350106              | 1           | 0.759082301 | 1.133755661 | 1.253432591 |             |
|         | 1.050804261                                                   | 0.846270206              | 1           | 1.10607291  | 1.446316489 | 1.360560789 |             |
|         | 1.27726333                                                    | 0.761800798              |             |             |             |             |             |
| YGR065C | YGR065C::VHT1::vitamin H transporter                          |                          |             |             | 1           | 1.783322258 |             |
|         | 0.923755397                                                   | 1.065825131              | 0.567353591 | 1           | 1.049385689 | 1.059423111 |             |
|         | 0.797144204                                                   | 1                        | 4.820259843 | 1.500358918 | 0.410189056 | 0.628838128 | 1           |
|         | 1.248180473                                                   | 0.171699906              | 0.560070808 | 0.558728082 | 1           | 1.375869652 |             |
|         | 0.545820768                                                   | 0.345509273              | 1.840744911 | 1           | 2.052972937 | 2.317946203 |             |
|         | 2.516828078                                                   | 1.301844055              | 0.874472871 | 1           | 3.410695931 | 2.37775993  |             |
|         | 2.229289177                                                   | 1.010699083              | 0.608524594 | 1           | 2.434476504 | 1.857731652 |             |
|         | 0.829544256                                                   | 0.380214713              | 0.566117842 | 0.721514177 |             |             |             |
| YJL220W | YJL220W::YJL220W::molecular_function                          | unknown                  |             |             | 1           | 1.318037208 |             |
|         | 1.361078965                                                   |                          | 1.331547938 | 1           | 1.160072493 | 1.218663341 | 1           |
|         | 1.01491796                                                    |                          | 1.442175157 | 1.234918262 | 1           | 0.714885592 |             |
|         | 0.512254793                                                   |                          | 1           | 0.500244554 |             | 1           | 0.842973924 |

|             |                                                                                                                       |             |             |             |             |             |
|-------------|-----------------------------------------------------------------------------------------------------------------------|-------------|-------------|-------------|-------------|-------------|
| 0.961514199 | 0.644593341                                                                                                           | 0.658814113 | 1.247780736 | 1           | 1.414559989 |             |
| 1.580443587 | 0.937214606                                                                                                           | 1.257248613 | 1.992994962 | 1           | 0.949598358 |             |
| 1.378306912 | 1.020580552                                                                                                           | 1.702038402 | 1.160420357 | 2.364184842 |             |             |
| YGR067C     | YGR067C::YGR067C::molecular_function unknown                                                                          |             |             |             | 1           | 1.389377473 |
| 1.22142038  | 1.121676744                                                                                                           | 1           | 1.163053027 |             | 1.245840731 |             |
| 1.382877895 | 1.369464791                                                                                                           | 1.439003985 | 1.338018743 | 1           | 1.047761114 |             |
| 1.437508268 | 0.705096592                                                                                                           |             | 0.954958995 |             | 1           |             |
| 0.708931897 | 0.846738403                                                                                                           | 1.003118314 | 1.023363013 | 0.876360638 | 1           |             |
| 0.815580143 | 0.730178168                                                                                                           | 0.7789551   | 1.097702107 | 0.846796601 | 1           |             |
| 0.82017782  | 0.666170561                                                                                                           | 0.693186087 | 0.509164319 | 0.79195825  | 0.65409111  |             |
| YJL222W     | YJL222W::VTH2::vps ten homolog                                                                                        |             |             |             | 1           | 1.179103916 |
| 1.341389091 | 1.260703725                                                                                                           | 1           | 1.285231993 | 1.350910061 | 1.218282248 |             |
| 1.285934435 | 1                                                                                                                     | 1.498676815 | 1.423333057 | 1.627835927 | 1.330269235 |             |
| 1.241466317 | 1.307807727                                                                                                           | 1.200691263 | 1.649638911 | 1           | 1.216565517 |             |
| 1.847884652 | 1.866452516                                                                                                           | 1.061680027 | 1           | 1.05058908  | 1.168577872 |             |
| 1.066866718 | 1.575469078                                                                                                           | 1.791417406 | 1           | 0.981117289 | 0.598867598 |             |
| 0.811851697 | 0.67575167                                                                                                            | 0.546717171 | 1           | 0.747038918 | 0.673892746 |             |
| 0.88252603  | 0.673242523                                                                                                           | 0.695091506 | 0.760041607 |             |             |             |
| YGR081C     | YGR081C::YGR081C::molecular_function unknown                                                                          |             |             |             | 1           | 0.93874153  |
| 1.159506069 | 0.951892935                                                                                                           | 1.273364062 | 1           | 0.811001576 | 0.785242741 |             |
| 1.287729412 | 1.362638269                                                                                                           | 1           | 0.734170929 | 0.851497477 | 0.875267457 |             |
| 1.114812518 | 1                                                                                                                     | 1.716368565 | 0.48423792  | 0.686486833 | 1           |             |
| 0.579704171 | 0.831881776                                                                                                           | 0.64145506  | 1.07127637  | 1           | 0.809463758 |             |
| 0.97465885  | 0.835876089                                                                                                           | 0.743600573 | 0.984821758 | 1           | 1.23905403  |             |
| 1.454208495 | 1.019323817                                                                                                           | 1.492455472 | 1.927791247 | 1           | 0.85059232  |             |
| 1.184654708 | 1.082301368                                                                                                           |             | 0.87343159  | 1.220619903 |             |             |
| YGR083C     | "YGR083C::GCD2::translation initiation factor eIF2B, 71 kDa (delta) subunit; translational repressor of GCN4 protein" |             |             |             | 1           | 0.773125037 |
| 0.654658826 | 0.694689096                                                                                                           | 1           | 0.790589994 | 0.744784926 |             |             |
| 0.75134108  | 1                                                                                                                     | 0.737140264 | 0.605004643 | 0.483298469 | 0.839257688 |             |
| 0.36113675  | 0.239544637                                                                                                           | 0.417473425 | 0.579880325 | 1           | 0.801769393 |             |
| 0.829836124 | 1.299461811                                                                                                           | 1           | 0.902694634 | 0.858760421 | 0.982425557 |             |
| 0.875771361 | 1.020461337                                                                                                           | 1           | 0.740001528 | 0.667414006 | 0.636986942 |             |
| 0.864547396 | 0.709530532                                                                                                           | 1           | 1.46233201  | 1.404646397 | 1.587636881 |             |
| 1.328922236 | 1.306059089                                                                                                           | 0.923783274 |             |             |             |             |
| YGR085C     | YGR085C::RPL11B::Homology to rat L11 and E. coli L5; involved in protein synthesis                                    |             |             |             | 1           | 1.042379739 |
| 0.9555073   | 0.833549357                                                                                                           | 1.397102214 | 1.124046686 | 1           | 0.874828159 |             |
| 0.789401152 | 1.010021522                                                                                                           |             | 0.801346477 | 0.343242557 | 0.209801662 |             |
| 0.426342693 | 1                                                                                                                     | 1.345556661 | 1.017719357 | 0.546928612 | 0.848645128 |             |
| 0.841420872 | 0.802541174                                                                                                           | 0.569945431 | 0.800765819 | 0.890885209 | 1           |             |
| 1.508819427 | 2.060763756                                                                                                           | 1.308585754 | 0.864783786 | 2.364719614 | 1           |             |
| 1.083254574 | 1.116011487                                                                                                           | 0.910866083 | 1.739177269 | 1.261725763 | 1.17421175  |             |
| YGR087C     | "YGR087C::PDC6::Third, minor isozyme of pyruvate decarboxylase"                                                       |             |             |             | 1           |             |
| 1.592900388 | 0.972866859                                                                                                           | 1.050597298 | 0.852328324 | 1           | 1.511121998 |             |
| 1.350364062 | 0.702986326                                                                                                           | 1.065712207 | 1           | 1.675245    | 1.132261311 |             |
| 0.637752015 | 0.76882728                                                                                                            | 1           | 1.268108553 | 1.68808613  | 1.647230123 |             |
| 0.663611629 | 1                                                                                                                     | 0.439941782 | 0.205328765 | 0.254430039 | 0.489636176 |             |
| 0.968445996 | 0.78905389                                                                                                            | 1.046715487 | 1.475016043 | 1.138715788 | 1           |             |
| 0.845472109 | 0.640236436                                                                                                           | 0.658366878 | 0.639830974 | 0.326424537 | 1           |             |
| 0.797075704 | 0.759966945                                                                                                           | 0.994026626 | 0.674812129 | 0.909007482 | 0.606807448 |             |
| YCR026C     | YCR026C::YCR026C::molecular_function unknown                                                                          |             |             |             | 1           | 1.075951024 |
| 0.878425394 | 1.339797723                                                                                                           | 0.801674956 | 1           | 1.138581895 | 1.165238393 |             |
| 0.823217012 | 0.905970767                                                                                                           | 1           | 1.115954671 | 0.905278472 | 0.987804334 |             |
|             | 0.84137394                                                                                                            | 0.644559141 | 1           | 0.976049958 |             |             |
| 0.853808102 | 0.78975258                                                                                                            | 0.867017716 |             | 0.794065551 | 0.682249736 |             |



1.214295368 1.638259942 2.536315534 1.967281984 0.968307694 1  
1.032945051 1.276411278 1.573963896 0.390891625 0.85837165 0.805574095  
YCR029ca YCR029ca 1.035512392 1.114902791 0.734621928 1.303986725  
0.761547922 0.743604599 1.070583877 1.132469733 0.827063539  
0.909636635 1.099620588 0.943745383 1 1.213016069 0.711883235  
0.763525713 1.554080384 1 1.768116627 1.598429695 1.681442361  
1.353047872 1 1.099806901 0.977041313 0.49813522 0.806138003  
0.88494498 1 0.963337309 1.44826015 0.824730906 0.761186282  
1.867789763 1 1.339330711 1.522296335 0.944776767 1.502791708  
1.566863778 1.525336994  
YDL138w YDL138w::RGT2::glucose permease 1 1.341388748 1.047758444  
1.476391697 1 1.525617836 1.269889393 1.281941951 0.980964427 1  
1.523837615 1.57711469 0.974662537 1.271293996 1 0.920815714  
1.193757108 0.759410344 1 1.848801857 2.975181662 0.914769585 1  
1.024225514 1.089500449 1.047829544 1.031476029 1.017035137 1  
0.823930542 0.734362605 0.726163293 0.890049948 0.732659286 1  
0.963203375 0.812192711 1.003805431 0.634723958 0.89035266 0.86161404  
YLR235C YLR235C::YLR235C::molecular\_function unknown 1.077376125  
1.080738283 1.267977501 0.884987961 1.007216289  
1.192370075 1.315799904 1.963190819 1.427365908 1  
1.488590054 1.734796646 1.036588998 1  
1.202763951 1.182763846 1.111482723 1.23676053 1.056698392 1  
0.784643475 0.620174665 0.8288131 0.758402055 0.742353499 1  
0.951112337 0.857042146 0.882173564 0.827269861 1.414654582 0.86161404  
YPR016C "YPR016C::TIF6::similar to human translation initiation factor 6  
(eIF6); however, TIF6 does not act as a true translation initiation factor.The  
protein may be involved in the biogenesis and or stability of the 60S ribosomal  
subunits" 1 1.031715986 0.654851464 0.82910622 0.864432915 1  
0.812935132 0.86854476 0.638745825 0.852562127 1 0.839619291  
0.552456928 0.614407364 0.666163408 1 0.534711551 0.234377825  
0.400559196 0.442574776 1.103630332 0.521090044 0.439789753  
0.596836593 1 0.832749194 0.736335526 0.875554453 1.504033869  
0.870512963 1 0.593988657 0.403419228 0.424417459 0.556447274  
0.273098244 1 0.681532848 0.368796942 0.651957339 0.459344614  
0.452433453 0.584041204  
YAL065C YAL065C::YAL065C::molecular\_function unknown 1 1.262157654  
1.266276331 1.210464545 1.417852132 1 1.192210008 1.164884293  
1.288506914 1.195825202 1 1.153272179 1.120463382 1.429432127 1  
0.97394229 0.855086782 0.846491624 1.16199936 1 1.154834782  
1.293556805 1.11038649 0.894217216 1 1.458219853 1.388398388  
1.514532207 1.334706117 0.958270575 1 1  
0.757573209 0.489870866  
YAL065C YAL065C::YAL065C::molecular\_function unknown  
1 1.277470656  
1.112481281 1.028493161 1.047790959 0.892699327 1 0.714216522  
0.845648204 1.08243071 0.691328533 1.115229727 1 0.803338326  
1.097437944 0.956023115 1.284874741 1.181429247 1.156699286  
YAL067C YAL067C::SEO1::Suppressor of Sulfoxyde Ethionine resistance 1  
1.69466607 1.601887971 1.416658036 1.548347078 1 1.515622552  
1.332478493 1.489214653 1.417623369 1 1.529528746 1.452215814  
1.797094671 1.637328158 0.931734592 0.770167443  
0.585946744 1.084079752 0.960829002  
0.865012273 1 0.76256158 1.022200535  
0.705627387 0.855973834 1.070843605 0.950927634  
YAR002W YAR002W::NUP60::nuclear pore protein 1 0.881444309  
0.886815914 1.007181747 0.914806708 1 0.979202668 1.005385222

|             |                                                                                                                                                                                                 |             |             |             |             |             |
|-------------|-------------------------------------------------------------------------------------------------------------------------------------------------------------------------------------------------|-------------|-------------|-------------|-------------|-------------|
| 0.967824728 | 0.927609701                                                                                                                                                                                     | 1           | 0.807077323 | 0.788017439 | 0.772685752 |             |
| 1.050355039 | 1                                                                                                                                                                                               | 0.688104735 | 0.680655272 | 0.689742418 | 0.643141435 | 1           |
| 0.795347181 | 0.627265726                                                                                                                                                                                     | 0.563317503 | 0.912296958 | 1           | 0.909347274 |             |
| 0.918809158 | 0.714377883                                                                                                                                                                                     | 0.961980932 | 0.870826278 | 1           | 0.879152653 |             |
| 0.755876257 | 0.759530309                                                                                                                                                                                     | 0.7889237   | 0.940230547 | 1           | 0.897158209 |             |
| 0.755773989 | 0.854272423                                                                                                                                                                                     | 0.617596396 | 0.912291092 | 1.266152286 |             |             |
| YAL014C     | "YAL014C::SYN8::SNARE protein related to mammalian SYNTAXIN 8, ULP1 Interacting Protein 2"                                                                                                      |             |             |             |             |             |
| 1           | 1.048414278                                                                                                                                                                                     | 0.907901888 | 1.077721014 | 0.946420733 | 1           |             |
| 1.042636922 | 1.101231173                                                                                                                                                                                     | 0.852240442 | 0.988991105 | 1           | 1.010219233 |             |
| 0.934434956 | 0.841059647                                                                                                                                                                                     | 0.922731616 | 1           | 1.450141563 | 1.291744517 |             |
| 1.547729272 | 1.515637035                                                                                                                                                                                     | 1           | 1.007183061 | 0.705694534 | 0.883944511 |             |
| 0.989658238 | 1                                                                                                                                                                                               | 1.151578005 | 1.055320323 | 0.984717388 | 1.041874091 |             |
| 0.845217472 | 1                                                                                                                                                                                               | 0.93541009  | 1.072128934 | 0.910713135 | 1.07918174  | 1           |
| 1.128553465 | 1.268644036                                                                                                                                                                                     | 1.057279953 | 1.354768849 | 1.264897244 | 1.082271213 |             |
| YAL016W     | YAL016W::TPD3::protein phosphatase 2A regulatory subunit A                                                                                                                                      |             |             |             |             |             |
| 1           | 0.962647185                                                                                                                                                                                     | 0.78155414  | 1.0594176   | 0.854616477 | 1           | 1.133341546 |
| 1.037803509 | 0.854732317                                                                                                                                                                                     | 0.811229988 | 1           | 0.99014166  | 1.086525947 |             |
| 1.004766723 | 0.870937189                                                                                                                                                                                     | 1           | 1.606875654 | 1.583353859 | 1.529205336 |             |
| 1.170270922 | 1                                                                                                                                                                                               | 0.661549612 | 0.879752756 | 0.89489082  | 0.913042922 | 1           |
| 1.207475668 | 1.224177398                                                                                                                                                                                     | 1.408105655 | 1.135795583 | 1.093246818 | 1           |             |
| 1.22640064  | 1.024604875                                                                                                                                                                                     | 1.388356548 | 0.794099136 | 0.543701236 | 1           |             |
| 1.323632576 | 1.132885666                                                                                                                                                                                     | 0.93334809  | 0.88926482  | 0.965108289 | 1.009594469 |             |
| YGR089W     | YGR089W::YGR089W::molecular_function unknown                                                                                                                                                    |             |             |             |             |             |
| 1           | 1                                                                                                                                                                                               | 1.326703757 |             |             |             |             |
| 0.989881393 | 1.342101316                                                                                                                                                                                     | 1.139690835 | 1           | 1.49549717  | 1.294576519 |             |
| 1.032060727 | 0.974058943                                                                                                                                                                                     | 1           | 1.248259453 | 0.983056393 | 0.710454483 |             |
| 1.277611256 |                                                                                                                                                                                                 | 1.21644585  |             | 0.922825634 |             |             |
| 1           | 1.018842454                                                                                                                                                                                     | 1.157211791 | 0.972523105 | 1.083566791 | 0.97325691  | 1           |
| 0.830809895 | 0.80891567                                                                                                                                                                                      | 0.970062172 | 0.737425947 | 0.942740849 | 1           |             |
| 1.103620316 | 1.077523637                                                                                                                                                                                     | 1.135552382 | 1.176744091 | 1.194247792 |             |             |
| YGR091W     | YGR091W::PRP31::pre-mRNA splicing protein 1                                                                                                                                                     |             |             |             |             |             |
| 1           | 0.898769105                                                                                                                                                                                     | 1.059167663 | 1.062587921 | 1           | 0.883315713 | 0.974940615 |
| 1.178706403 | 1                                                                                                                                                                                               | 0.8376551   | 0.936743028 | 0.900177657 | 1.116129294 |             |
| 1.104759926 | 1.003892141                                                                                                                                                                                     | 1.268493196 | 1.307909315 | 1           | 0.886065354 |             |
| 0.462180664 | 0.644675816                                                                                                                                                                                     | 1           | 0.924638887 | 0.813071585 | 0.627087282 |             |
| 0.925518727 | 1.028547717                                                                                                                                                                                     | 1           | 0.956235322 | 1.004809978 | 1.087365405 |             |
| 1.061386284 | 1.493104478                                                                                                                                                                                     | 1           | 0.901614351 | 0.870875592 | 0.951205996 |             |
| 0.630332011 |                                                                                                                                                                                                 | 0.825713448 |             |             |             |             |
| YGR105W     | "YGR105W::VMA21::Protein involved in vacuolar H-ATPase assembly or function. Required for the biogenesis of a functional vacuolar ATPase (V-ATPase), but not part of the final enzyme complex." |             |             |             |             |             |
| 1           | 1                                                                                                                                                                                               | 1.719931043 |             |             |             |             |
| 1.446926482 | 1.662088696                                                                                                                                                                                     | 1           | 1.666283682 | 1.414638969 | 1.387756073 | 1           |
| 1.635496028 | 1.302615354                                                                                                                                                                                     | 1.822108077 |             |             |             |             |
| 1           | 1                                                                                                                                                                                               | 0.946531031 |             | 0.944110472 | 0.979930909 |             |
| 1.091328408 | 1                                                                                                                                                                                               | 0.96524853  | 1.332120617 | 1.119231557 | 0.980558261 |             |
| 1.139314597 | 1                                                                                                                                                                                               | 0.963341295 | 1.273670962 | 1.004313074 | 1.428980524 |             |
| 1.304679768 |                                                                                                                                                                                                 |             |             |             |             |             |
| YGR107W     | YGR107W::YGR107W::molecular_function unknown                                                                                                                                                    |             |             |             |             |             |
| 1           | 1                                                                                                                                                                                               | 1.216765178 | 1.6455796   | 1           | 1.513531382 |             |
| 1.233220708 | 1.578505214                                                                                                                                                                                     | 1.398324257 |             |             |             |             |
|             |                                                                                                                                                                                                 |             | 0.723393437 |             | 0.925295231 |             |
| 0.962667576 | 0.807558156                                                                                                                                                                                     |             | 1           | 0.725133366 | 0.538039519 |             |
| 0.896553157 | 0.28994069                                                                                                                                                                                      |             | 1.062131964 |             |             |             |
| YGR109C     | YGR109C::CLB6::role in DNA replication during S phase 1                                                                                                                                         |             |             |             |             |             |
| 1           | 0.984231162                                                                                                                                                                                     | 0.932940681 | 1.156441015 | 1.240166295 | 1           | 0.912615821 |
| 0.998653223 | 1.100932378                                                                                                                                                                                     | 1.190238398 | 1           | 0.512858841 | 0.644004551 |             |
| 0.81118775  | 1.41294898                                                                                                                                                                                      | 1           | 0.690910076 |             | 0.715245494 | 1.190084241 |
|             |                                                                                                                                                                                                 | 0.462031963 | 1           | 0.763984435 | 0.98566596  | 0.806269816 |

|         |                                                                                                       |             |             |             |             |             |
|---------|-------------------------------------------------------------------------------------------------------|-------------|-------------|-------------|-------------|-------------|
|         | 0.690605005                                                                                           | 1.001057455 | 1           | 1.002518831 | 1.505992523 | 1.638042855 |
|         | 1.298899226                                                                                           | 1.558240038 |             | 0.859024636 | 0.954410829 | 0.974916087 |
|         | 0.837029044                                                                                           | 1.130548299 | 1.101535006 |             |             |             |
| YGR111W | YGR111W::YGR111W::molecular_function unknown                                                          |             |             | 1           |             | 0.858169093 |
|         | 1.016165157                                                                                           | 1.054803032 | 1.1896987   | 1           | 0.959397775 | 1.111737263 |
|         | 1.201393509                                                                                           | 1.067077766 | 1           | 0.810851477 | 1.219660512 | 1.312464788 |
|         | 1.270124376                                                                                           | 1           | 1.808603485 | 1.903755066 | 2.255584053 | 2.108879035 |
|         | 1.323024611                                                                                           | 1.016160363 | 1.594955319 | 1.676386116 | 1           | 1.055066125 |
|         | 1.595172706                                                                                           | 1.163835457 | 0.854850492 | 1.021387346 | 1           | 0.9987477   |
|         | 1.464443277                                                                                           | 1.216696353 | 1.151819869 | 1.515415168 | 1           | 1.443679214 |
|         | 1.602167621                                                                                           | 1.411278981 | 1.326203254 | 2.38753574  | 1.17596308  |             |
| YGR113W | YGR113W::DAM1::Duo1 And Mps1 interacting. Localized to intranuclear spindles and spindle pole bodies. |             |             | 1           | 0.811059966 | 0.949910851 |
|         | 0.937885874                                                                                           | 1           | 0.880787757 | 0.943760491 | 0.969038485 | 0.913376466 |
|         | 0.843211885                                                                                           | 0.973369734 | 0.778800914 | 1.117140627 | 1           | 1.201402048 |
|         | 0.734033237                                                                                           | 1.091509644 | 1           | 1.256800697 | 0.931523342 | 1.376270801 |
|         | 0.970441083                                                                                           | 1           | 1.026486468 | 1.152273854 | 1.073654494 | 1.071662021 |
|         | 1.142215042                                                                                           | 1           | 0.864020208 | 0.735627317 | 0.724866477 | 1.092626321 |
|         | 0.886967803                                                                                           | 1           | 0.98405889  | 1.408960667 |             | 1.329074401 |
|         | 0.911524592                                                                                           |             |             |             |             |             |
| YGR115C | YGR115C::YGR115C::molecular_function unknown                                                          |             |             | 1           |             | 0.746847128 |
|         | 0.941406265                                                                                           | 1.412636457 | 0.826232501 | 1           | 1.121498461 | 1.299153447 |
|         | 0.73973137                                                                                            | 1           | 1.013353337 | 1.209811814 | 0.579193506 | 1.222407981 |
|         | 0.959029104                                                                                           |             | 0.672574635 | 0.286019923 | 1           | 0.887606562 |
|         | 0.467581267                                                                                           | 0.397904934 | 1           | 0.687145052 | 0.91792417  | 0.749150303 |
|         | 0.646308053                                                                                           | 0.669072189 | 1           | 1.294118251 | 0.651043227 | 1.184122202 |
|         | 2.038442831                                                                                           | 1.029234645 | 1           | 0.850214643 | 0.86872914  | 1.148105692 |
|         | 0.556776508                                                                                           | 0.931288481 | 0.556021232 |             |             |             |
| YGR129W | YGR129W::SYF2::SYnthetic lethal with cdcForty                                                         |             |             | 1           |             | 0.866588592 |
|         | 1.186436879                                                                                           | 1.132237415 | 1           | 0.846923162 | 0.985166237 | 1.117330614 |
|         | 1.23892822                                                                                            | 1           | 0.769629268 | 0.903300761 | 0.969131172 | 1.357032242 |
|         | 0.713173213                                                                                           |             | 0.591537967 | 0.746619325 | 0.554143505 | 0.807354121 |
|         | 0.524597684                                                                                           | 0.393542496 |             | 0.924421413 | 1.039132682 | 0.915355374 |
|         | 1.09268846                                                                                            | 1.124324554 | 1           | 0.811853464 | 0.735916366 | 0.744912319 |
|         | 1.721386066                                                                                           | 1.431482916 | 1           | 0.737332483 | 1.165704961 |             |
|         | 0.930169084                                                                                           | 0.915027042 |             |             |             |             |
| YGR131W | YGR131W::YGR131W::molecular_function unknown                                                          |             |             | 1           |             | 1.339539406 |
|         | 1.420401716                                                                                           | 1.050571576 | 1.413327066 | 1           | 1.07602385  | 1.081791558 |
|         | 1.22031121                                                                                            | 1           | 1.021811861 | 1.516844343 | 2.34035519  | 1.097334373 |
|         |                                                                                                       | 1.937089698 | 1.963823124 |             | 0.336444268 | 0.382430907 |
|         | 0.106539129                                                                                           | 1           | 1.25866795  | 2.313511484 | 1.629474531 | 1.267908841 |
|         |                                                                                                       | 2.81549364  | 3.660252306 |             | 1           | 1.293446538 |
|         | 0.8665994                                                                                             |             | 1.143564939 |             |             |             |
| YAL018C | YAL018C::YAL018C::molecular_function unknown                                                          |             |             |             |             | 0.966560327 |
|         | 1.046573776                                                                                           | 0.998504385 | 1.101340125 |             | 0.952842937 | 1.021495268 |
|         | 0.978830567                                                                                           |             | 1.030815383 | 1.029506625 | 0.964304179 | 1           |
|         | 1.402910497                                                                                           |             | 1.279452409 | 0.927732052 | 0.391160107 | 1.024288614 |
|         | 0.684894415                                                                                           |             | 0.555794094 | 1.058821626 | 0.905200893 | 1           |
|         | 0.561335421                                                                                           | 0.878508932 |             | 0.884521626 | 1.683080325 | 1           |
|         | 0.943706572                                                                                           | 0.773055825 | 0.706928457 | 0.681745951 |             | 0.690058758 |
| YAL022C | YAL022C::FUN26::predicted membrane protein                                                            |             |             | 1           |             | 1.314800643 |
|         | 0.967884286                                                                                           | 1.201295802 | 0.977099851 | 1           | 1.325827966 | 1.136976626 |
|         | 0.948525968                                                                                           | 0.974747542 | 1           | 1.136332448 | 1.041867371 | 1.064471569 |
|         | 0.839512321                                                                                           | 1           | 0.69670042  | 0.497250496 | 0.655622864 | 0.913219667 |
|         | 0.89112568                                                                                            | 1.537780502 | 0.784189617 | 0.976971992 | 1           | 1.31869795  |
|         | 1.024654527                                                                                           | 1.212889226 | 1.262151736 | 0.990769338 | 1           | 0.985656509 |

0.895548332 1.002372634 0.603112583 1.008003877 1 0.908273244  
 0.960496256 1.000696725 0.991559452 0.984764372 1.03936572  
 YAL024C YAL024C::LTE1::Gdp/GTP exchange factor required for growth at low  
 temperatures 1 1.840259408 1.245242377 1.413675834 1.537325028 1  
 1.683620418 1.36747432 1.384267426 1 1.24307117 1.206847686  
 1.050341169 1 0.518871432 0.569997943 0.656472703 1  
 0.728972157 0.871001038 0.30520894 0.568198159 1 0.935394329  
 0.944995365 1.056378533 1  
 0.913537606 0.703737906 0.69211438 1.504792758 0.682130405 2.411468451  
 YAL024C YAL024C::LTE1::Gdp/GTP exchange factor required for growth at low  
 temperatures  
 1 0.720591291 0.860072704 1.067185835 0.7767885 1  
 1.241746769 0.971663443 1.804614876 1.162744142 1 0.903034966  
 1.126358857 0.892732172 0.566739854 1.034111939  
 YAL036C YAL036C::FUN11::Function Unknown Now; similar to Xenopus GTP-binding  
 protein DRG 1 1.188003478 0.810695108 0.991500362 1.162663239 1  
 0.898424829 0.816033035 0.94792337 1.065695318 1 0.816522544  
 0.459099908 0.437718152 0.999319846 1 0.485007264 0.219144157  
 1 0.571522642 0.225918757 0.219739597 0.487114971 1 1.142960512  
 0.856858095 0.92129388 1.325771356 0.92495101 1 1.042545989  
 0.854271027 0.769134244 0.720266325 1.032330486 1 0.784972184  
 0.847968074 0.745631436 1.129629309 0.50012988 0.798569088  
 YAL038W YAL038W::CDC19::Required for START A in the cell cycle and  
 sporulation 1 0.945819211 0.689414718 0.974181755 0.618445923 1  
 1.235030418 1.077859882 0.727989002 1 0.958820522 0.877260282  
 0.62046745 0.705725724 1 1.245265193 1.120525316 1.221686202  
 0.581956015 1 0.804381694 0.413964384 0.343589746 0.542517476 1  
 1.15334626 0.893369505 1.432811118 1.311594901 1.042780018 1  
 1.108602318 0.748538556 0.9918349 0.557412848 0.416099132 1  
 0.812544294 0.7087255 0.873316199 0.632002224 0.723493903 0.713633558  
 YAL040C YAL040C::CLN3::role in cell cycle START; involved in G(sub)1 size  
 control 1 0.988330998 0.715431311 0.995530374 0.707556599 1  
 1.118539459 1.129909882 0.686809607 1 1.022652663 1.063534469  
 0.690936186 0.703364333 1 0.935107527 0.959457161 0.983499203  
 0.900885358 1 0.699427415 0.645982713 1 1.181011357  
 1.01800602 1.075717609 1.144830255 0.888403744 1 0.660959513  
 0.583572117 0.605534922 0.592947525 0.679138336 1 0.711404771  
 0.725310542 0.459328425 0.843011674 0.710809287 0.840599021  
 YAL042W YAL042W::ERV46::ER vesicle protein of 46 kDa 1 1.105262047  
 0.964773378 0.832498216 0.396146253 1 1.079677271 1.184630595  
 0.664350284 0.726531997 1 1.209017437 1.192383135 1.008653843  
 0.799721146 1 1.018926267 0.784779678 1.01000059 0.62343676 1  
 1.037200706 0.584112383 0.528285316 0.511249161 1 0.884728759  
 0.859459511 1.022643059 1.143656286 0.923018648 1 0.873376806  
 0.669686923 0.892128453 1.013522365 0.435259753 1 0.80563147  
 0.616606073 0.97766939 0.586065222 0.725304666 0.719762951  
 YAL044C YAL044C::GCV3::H-protein subunit of the glycine cleavage system 1  
 1.1532077 1.426892906 1.048992499 1.153012002 1 1.073272664  
 1.021849417 1.591665344 1.414669512 1 1.329335142 2.218181709  
 2.833161026 1.453560853 1 2.143632364 2.416846638 2.740415172  
 2.552712332 1 2.744228815 3.808762511 4.932140836 3.876819097 1  
 1.19047392 1.173106906 1.334265997 1.244264469 1.34448941 1  
 1.059002903 1.273982332 1.122881394 1.614147325 4.058020515 1  
 1.152135516 1.458656785 1.39833849 2.027977494 3.543561109 1.672441811  
 YAL046C YAL046C::YAL046C::molecular\_function unknown 1 1.403426448  
 1.220879002 0.996716246 1.233350575 1 1.026001215 1.062648361

|             |                                                                    |             |             |             |             |
|-------------|--------------------------------------------------------------------|-------------|-------------|-------------|-------------|
| 1.17478909  | 1.281183786                                                        | 1           | 1.121988185 | 1.078620131 | 1.109715873 |
| 1.206613841 | 1                                                                  | 0.896000596 | 0.376324548 | 0.786854892 | 1.356033041 |
| 1.688102336 | 1.628484669                                                        | 1.559348535 | 1.290195256 | 1           | 0.903933864 |
| 0.643484532 | 0.615559275                                                        | 1.035234663 | 0.822017968 | 1           | 0.749735546 |
| 0.456036564 | 0.405674893                                                        | 0.592261131 | 0.8034327   | 1           | 0.833114976 |
| 0.636285346 | 0.640943329                                                        | 0.578427552 | 0.72896072  | 1.029733823 |             |
| YAL063C     | YAL063C::FLO9::putative cell wall protein involved in flocculation |             |             |             |             |
| 1           | 1.060860548                                                        | 0.827003405 | 1.0883015   | 0.792487944 | 1           |
| 1.177219432 | 0.775274282                                                        | 0.871619256 | 1           | 1.104962963 | 1.030486906 |
| 0.716945021 | 0.913001831                                                        | 1           | 1.336234717 | 1.130426817 | 1.06221744  |
| 0.952813467 | 1                                                                  | 1.095429743 | 1.113302211 | 1           | 0.986545321 |
| 0.981379822 |                                                                    | 0.836083264 | 1           | 1.153185345 | 1.191139505 |
| 1.195367473 | 1.192920128                                                        | 1.073717586 | 1           | 0.778866406 | 1.115524473 |
| 0.633282386 | 1.542442211                                                        | 0.837737056 | 1.058629408 |             |             |
| YGR133W     | YGR133W::PEX4::Involved in peroxisome biogenesis 1                 |             |             |             |             |
| 1.516911058 | 1.356281062                                                        | 1.123640645 | 1.320788833 | 1           | 1.163470174 |
| 1.147222757 | 1.603223883                                                        | 1.38668748  | 1           | 1.487070912 | 1.355758557 |
| 1.586856995 | 1.462792727                                                        | 1           | 1.304922676 | 0.960705061 | 0.954739414 |
| 1.869269445 | 1                                                                  | 2.071448916 | 1.323614726 | 1.784943802 | 1           |
| 1.172396048 | 1.184985025                                                        | 1.293961961 | 1.135185546 | 1           | 0.805467121 |
| 1.406666905 | 1.144019847                                                        | 1.254187727 | 1.654967486 | 1           | 0.941823003 |
| 1.099843837 | 1.08059129                                                         | 0.990333075 | 1.156000723 | 0.946549518 |             |
| YGR135W     | YGR135W::PRE9::proteasome component Y13 1                          |             |             |             |             |
| 1.362481141 | 1.194360708                                                        | 1.438011996 | 1           | 1.16622161  | 1.112426273 |
| 1.932753421 | 1.312646726                                                        | 1           | 1.050628006 | 1.508985943 | 1.784627372 |
| 1.38097621  | 1                                                                  | 1.289075676 | 1.047170065 | 1.31433804  | 1.588302692 |
| 1.859055099 | 1.84548023                                                         | 2.8363719   | 2.065485409 | 1           | 1.101929777 |
| 1.45655234  | 1.172834937                                                        | 0.688510543 | 1.188413152 | 1           | 1.106797111 |
| 2.267313079 | 1.953885883                                                        | 1.130990035 | 1.498269615 | 1           | 1.462104999 |
| 1.923124151 | 1.393957695                                                        | 1.629315672 | 1.698897584 | 1.552481354 |             |
| YGR137W     | YGR137W::YGR137W::molecular_function unknown 1                     |             |             |             |             |
| 1.81113393  | 1.278229515                                                        | 1.497149439 | 1           | 1.32493401  | 1.347838844 |
| 1.597588507 | 1.270802875                                                        | 1           | 1.369040242 | 1.678925053 | 2.844739107 |
| 1.265580357 |                                                                    | 0.393692875 | 0.393683191 | 0.474474562 | 0.518487729 |
| 2.571042437 | 4.722246183                                                        | 5.041580629 | 3.067038931 | 1           | 1.250370361 |
| 1.410390601 | 1.039604853                                                        | 0.83885336  | 1.029758872 | 1           | 0.974540514 |
| 1.908819275 | 1.265827428                                                        | 0.84028792  | 1.933691183 | 1           | 1.037633399 |
| 1.979586372 | 1.061102355                                                        | 1.824476654 | 1.516744861 | 2.012184037 |             |
| YGR139W     | YGR139W::YGR139W::molecular_function unknown 1                     |             |             |             |             |
| 1.261264467 | 1.55352895                                                         | 1.39315106  | 1           | 1.498550934 | 1.502513615 |
| 1.258387983 | 1.548759977                                                        | 1           | 1.3408029   | 1.177924462 | 0.889658207 |
| 1.564140135 |                                                                    |             |             | 1           |             |
|             |                                                                    | 1.103353601 | 1.123367752 | 1           | 1.474752755 |
| 1.44855909  | 1                                                                  | 0.873694285 | 0.826439179 |             | 0.713559647 |
| YGR153W     | YGR153W::TOS10::molecular_function unknown 1                       |             |             |             |             |
| 1.199628798 | 1.576849917                                                        | 1           | 1.22355626  | 1.010522299 | 1.616574546 |
| 1.62043478  | 1                                                                  | 1.382225625 | 1.585420993 | 1.842542763 | 1.457715341 |
| 0.875521559 | 0.772842135                                                        | 0.921183792 | 0.903424817 | 1           | 2.411434756 |
| 4.641991389 | 2.057947155                                                        | 2.320945813 | 1           | 0.766160987 | 0.835518877 |
| 0.57895724  | 0.711124176                                                        | 1.038980145 | 1           | 0.845518922 | 1.407754518 |
| 1.717608761 | 1.825055501                                                        | 2.555517679 | 1           | 0.944349404 | 1.119370814 |
| 0.648381977 | 1.337234758                                                        |             |             |             |             |
| YGR155W     | YGR155W::CYS4::encodes the first enzyme in cysteine biosynthesis 1 |             |             |             |             |
| 1.071397421 | 0.718573506                                                        | 1.076312302 | 0.774630385 | 1           | 1.201368842 |
| 1.073123732 | 0.814687918                                                        | 0.859562906 | 1           | 0.962162253 | 0.86564678  |
| 0.445974144 | 0.798724161                                                        | 1           | 1.271411443 | 0.718993755 | 0.684136368 |
| 0.473104081 | 1                                                                  | 0.856781906 | 0.292497767 | 0.266438053 | 0.809567469 |

|             |                                                                                           |             |             |             |             |
|-------------|-------------------------------------------------------------------------------------------|-------------|-------------|-------------|-------------|
| 0.917396347 | 0.769185473                                                                               | 1.059559398 | 1.302777088 | 0.892871622 | 1           |
| 1.111211683 | 0.843955975                                                                               | 0.741273186 | 0.883963236 | 0.712799677 | 1           |
| 1.185969207 | 0.668467409                                                                               | 0.943960069 | 0.68918012  | 0.661669137 | 0.818708442 |
| YGR157W     | YGR157W::CHO2::First step in the methylation pathway for phosphatidylcholine biosynthesis |             |             |             |             |
| 1           | 1.316140847                                                                               | 0.747183728 | 1.134313186 |             |             |
| 0.766124098 | 1                                                                                         | 1.18144393  | 1.224242749 | 0.702908402 | 0.713898984 |
| 0.97527455  | 0.867698528                                                                               | 0.398233213 | 0.737764209 | 1           | 1.126555982 |
| 0.936655006 | 0.95063436                                                                                | 0.627631178 | 1           | 0.838009709 | 0.492424525 |
| 0.495774243 | 0.833617                                                                                  | 1           | 1.154797349 | 1.032210445 | 1.306284136 |
| 1.463406636 | 0.980324025                                                                               | 1           | 1.227351806 | 1.119674443 | 0.74988524  |
| 0.837084498 | 0.878051993                                                                               | 1           | 1.172243132 | 1.153246618 | 1.159844144 |
| 1.159020239 | 0.84814286                                                                                | 1.009594469 |             |             |             |
| YGR159C     | YGR159C::NSR1::nuclear localization sequence binding protein                              |             |             |             |             |
| 1           |                                                                                           |             |             |             | 1           |
| 1.1800866   | 0.554364938                                                                               | 0.910144323 | 0.732796481 | 1           | 0.764248616 |
| 0.617074572 | 0.820507667                                                                               | 1.123234287 | 1           | 0.372337957 | 0.208486536 |
| 0.213550365 | 1.01249853                                                                                | 1           | 0.312849852 | 0.115145537 | 0.191993931 |
| 0.322051397 | 1                                                                                         | 0.382996426 | 0.170814319 | 0.089612815 | 0.362198495 |
| 0.697143699 | 0.317488263                                                                               | 0.570735158 | 1.097189208 | 0.698244917 | 1           |
| 0.50099428  | 0.283040926                                                                               | 0.191579828 | 0.479519795 | 0.660285025 | 1           |
| 0.475862692 | 0.360620105                                                                               | 0.724365728 | 0.941594468 | 0.240214755 | 0.767046613 |
| YGR161C     | YGR161C::YGR161C::molecular_function unknown                                              |             |             |             |             |
| 1           |                                                                                           |             |             |             | 1           |
| 1.412976931 | 0.834885493                                                                               | 0.59697392  | 1           | 1.211189648 | 1.332250206 |
| 0.936243723 | 0.665937448                                                                               | 1           | 1.737362319 | 1.726654632 | 1.839990377 |
| 0.794165838 | 1                                                                                         | 1.579559379 |             | 1.996966381 | 2.134505545 |
| 0.768350251 | 0.48530703                                                                                | 0.546405448 | 0.618579252 | 1           | 1.286323931 |
| 1.084073497 | 1.136468636                                                                               |             | 1.233801415 | 1           | 1.456060261 |
| 1.073854549 | 1.101770179                                                                               | 1.241371391 | 1           | 1.271802661 | 0.883161215 |
| 1.387849793 | 0.844354516                                                                               | 1.054921005 | 0.885255897 |             |             |
| YGR163W     | "YGR163W::GTR2::(putative) small GTPase, similar to Gtr1"                                 |             |             |             |             |
| 1           |                                                                                           |             |             |             | 1           |
| 1.058313812 | 1.097952507                                                                               | 1.010645943 | 1.119696506 | 1           | 0.963558315 |
| 1.033991892 | 1.226216394                                                                               | 1.250912049 | 1           | 0.878630272 | 1.126788612 |
| 1.215647707 | 1.151997489                                                                               | 1           | 1.245153629 | 0.910045928 | 1.111936434 |
| 0.984575413 | 1                                                                                         | 1.736519755 | 1.064298077 | 1.436675303 | 1.217906882 |
| 1.051620784 | 1.218648805                                                                               | 0.817936433 | 0.837884119 | 1.007312606 | 1           |
| 1.023135076 | 1.037282623                                                                               | 0.854631122 | 0.817440644 | 1.532252198 | 1           |
| 1.153803239 | 1.11946097                                                                                | 0.949611738 |             | 1.20294604  | 1.128679366 |
| YNL020C     | YNL020C::ARK1::actin regulating kinase                                                    |             |             |             |             |
| 1           |                                                                                           |             |             |             | 1           |
| 1.390013227 | 1.452722883                                                                               | 1.228961021 | 1           | 1.615125489 | 1.380528895 |
| 1.218439511 | 1.356781951                                                                               | 1           | 1.56821033  | 1.714965414 | 1.700275939 |
| 1.343000539 | 1                                                                                         | 1.323886572 | 1.214968947 | 1.406649352 | 1.36592233  |
| 1.702640734 | 1.488669711                                                                               | 1.389525244 | 1.161906232 | 1           | 1.030349136 |
| 1.041222383 | 1.074562793                                                                               | 0.943420446 | 0.867927892 | 1           | 0.986391192 |
| 0.759696086 | 1.096053939                                                                               | 0.757717056 | 0.797488835 | 1           | 1.11665304  |
| 1.068179719 | 1.00267885                                                                                | 0.861396256 | 1.04816563  | 0.965813311 |             |
| YNL022C     | YNL022C::YNL022C::molecular_function unknown                                              |             |             |             |             |
| 1           |                                                                                           |             |             |             | 1           |
| 0.79943415  | 1.085646901                                                                               | 1.026556352 | 1           | 0.923972875 | 0.832903205 |
| 0.973857249 | 1.163314067                                                                               | 1           | 0.718742351 | 0.695261573 | 0.572973719 |
| 1.054142754 | 1                                                                                         | 0.653404052 | 0.56634388  | 0.559299141 | 0.702662046 |
| 0.970316944 | 0.725853252                                                                               | 0.545875353 | 1.022339902 | 1           | 0.775802101 |
| 0.74626009  | 0.813720351                                                                               | 0.97068649  | 0.850316347 | 1           | 0.914261998 |
| 0.70416761  | 0.835444949                                                                               | 0.951173341 | 0.722520813 | 1           | 0.669585418 |
| 0.675029823 | 0.823285906                                                                               | 0.926269129 | 0.62067788  | 0.865992156 |             |
| YNL024C     | YNL024C::YNL024C::molecular_function unknown                                              |             |             |             |             |
| 1           |                                                                                           |             |             |             | 1           |
| 1.26116995  | 1.24424461                                                                                | 1.604015386 | 1           | 1.208340708 | 1.213458579 |
| 1.338278271 | 1.583751862                                                                               | 1           | 0.805923257 | 1.059865173 | 1.150670029 |
| 1.2056485   | 1                                                                                         | 0.999137477 | 1.180516101 | 1.972320307 | 1.00351481  |
| 1.477309499 | 2.291903452                                                                               | 0.931774294 |             | 1           | 1.038085175 |
|             |                                                                                           |             |             |             | 1.124362995 |

|         |                                                                                                 |             |             |             |             |             |             |
|---------|-------------------------------------------------------------------------------------------------|-------------|-------------|-------------|-------------|-------------|-------------|
|         | 0.966220243                                                                                     | 1.024780281 | 1.109594996 | 1           | 1.006594181 | 1.08956281  |             |
|         | 1.365149949                                                                                     | 1.000152441 | 1.193800177 | 1           | 0.869045463 | 1.16473926  |             |
|         | 1.049320922                                                                                     | 1.01484825  |             |             |             |             |             |
| YNL026W | YNL026W::YNL026W::molecular_function                                                            | unknown     |             | 1           |             | 1.038594086 |             |
|         | 0.983497862                                                                                     | 1.13803731  | 0.972322425 | 1           | 1.160575683 | 1.090924687 |             |
|         | 0.900020684                                                                                     | 0.919153584 | 1           | 1.112588081 | 1.221883055 | 0.774189966 |             |
|         | 0.977811026                                                                                     | 1           | 1.342529038 | 0.851214751 | 0.96975015  | 1           |             |
|         | 1.587001213                                                                                     | 0.902561602 |             | 1           | 1.245702237 | 1.486366682 |             |
|         | 1.36153883                                                                                      | 1.153863228 | 1.09403535  | 1           | 1.094836455 | 1.100855415 |             |
|         | 1.128998502                                                                                     | 0.950052029 | 0.939767857 | 1           | 1.076258641 | 1.179861273 |             |
|         | 1.0241565                                                                                       | 1.044891177 | 1.107223423 | 0.947425183 |             |             |             |
| YNL028W | YNL028W::YNL028W::molecular_function                                                            | unknown     |             | 1           |             | 1.089444675 |             |
|         | 1.171915132                                                                                     | 1.392599858 | 1.3122358   | 1           | 1.292491301 | 1.305923628 |             |
|         | 1.258650679                                                                                     | 1           | 1.223278309 | 0.730507442 | 1.238116872 | 1           |             |
|         | 0.559489348                                                                                     | 0.463466664 | 0.747554363 | 0.57927785  | 1           | 0.799820213 |             |
|         | 1                                                                                               | 0.938393238 | 0.739790795 | 0.81242136  |             | 1           |             |
|         | 0.977077289                                                                                     | 0.949183484 | 1.07361655  | 0.885666792 | 1           | 0.795022783 |             |
|         | 0.819087439                                                                                     | 1.304595901 | 0.758150487 | 1.007107617 | 0.805574095 |             |             |
| YNL042W | YNL042W::BOP3::bypass of PAM1                                                                   |             | 1           | 0.733262084 | 0.76991393  |             |             |
|         | 0.845126919                                                                                     | 0.756611765 | 1           | 0.838219385 | 0.87356943  | 0.796241217 |             |
|         | 0.7637779                                                                                       | 1           | 0.743192699 | 0.93870193  | 0.818983986 | 0.800599521 | 1           |
|         | 1.767687322                                                                                     | 1.961660792 | 2.019682378 | 1.178470388 | 1           | 1.394186401 |             |
|         | 1.56873006                                                                                      | 1.355256706 | 1.399220243 | 1           | 1.125461803 | 1.095280564 |             |
|         | 1.007178981                                                                                     | 0.977804004 | 0.969290633 | 1           | 0.958443856 | 1.053630958 |             |
|         | 1.046508281                                                                                     | 1.099908444 | 1.327811572 | 1           | 0.805206522 | 0.900246936 |             |
|         | 1.193507723                                                                                     | 1.054579929 | 1.101536853 |             |             |             |             |
| YNL044W | YNL044W::YIP3::Interacts with YPT                                                               | proteins    |             | 1           |             | 1.889246186 |             |
|         | 1.622061152                                                                                     | 0.958544686 | 1.800386638 | 1           | 1.141849307 | 1.075736852 |             |
|         | 1.257611829                                                                                     | 1.220971838 | 1           | 1.12683903  | 1.074277245 | 1.258921227 |             |
|         | 0.881864189                                                                                     | 1           | 0.880480162 | 0.523636444 | 0.565079019 | 1.203873219 | 1           |
|         | 1.099828835                                                                                     | 1.068704176 | 0.967764276 | 0.844503802 | 1           | 1.230758205 |             |
|         | 0.99740347                                                                                      | 0.733179903 | 0.986046707 | 0.808329089 | 1           | 0.747680786 |             |
|         | 0.804250959                                                                                     | 0.58534962  | 0.560811183 | 0.843946838 | 1           | 0.845251246 |             |
|         | 0.892959708                                                                                     | 0.819623928 | 1.433351537 | 1.16682685  | 1.543725122 |             |             |
| YAR007C | "YAR007C::RFA1::Required for DNA-damage repair, full levels of gene conversion and sporulation" |             | 1           | 1.081021362 | 0.977035948 | 1.182055401 |             |
|         | 0.93887949                                                                                      | 1           | 1.106605334 | 1.099585004 | 1.054512815 | 0.989825643 | 1           |
|         | 1.103154527                                                                                     | 1.094877273 | 1.07157883  | 1.151571909 | 1           | 0.84691133  |             |
|         | 0.561028457                                                                                     | 1.064552207 | 1.01411625  | 1           | 1.814740319 | 1.929426395 |             |
|         | 1.669623074                                                                                     | 1.323184728 | 1           | 0.950127227 | 0.88071421  | 0.849807226 |             |
|         | 1.167033075                                                                                     | 1           | 1.264956664 | 0.961807182 | 0.86251791  | 0.696824281 | 1           |
|         | 1.156036899                                                                                     | 1.05752986  | 0.944875169 | 0.986255683 | 1.146191829 |             |             |
| YNL046W | YNL046W::YNL046W::molecular_function                                                            | unknown     |             | 1           |             | 1.382558886 |             |
|         | 1.299354096                                                                                     | 1.023314484 | 1           | 1.045187011 | 0.98002973  | 1.263798448 |             |
|         | 1.473526832                                                                                     | 1           | 1.342106795 | 1.509657528 | 1.001157985 | 1           |             |
|         | 0.708587927                                                                                     | 0.60949861  | 0.686295039 | 1.010058626 | 1           | 1.364002753 |             |
|         | 1.449546997                                                                                     | 1.040678093 | 1           | 0.967772167 | 0.906213105 | 1.016260006 |             |
|         | 1.033730186                                                                                     | 0.780857802 | 1           | 0.771313594 | 1.25596286  | 0.881409701 |             |
|         | 0.543230753                                                                                     | 1.632733526 | 1           | 1.150901778 | 1.220564313 | 0.952405725 |             |
|         | 1.337613708                                                                                     | 1.128291721 | 1.160201842 |             |             |             |             |
| YAR040C | YAR040C                                                                                         |             | 1           | 1.464267694 | 1.290587566 | 1.203147958 | 1.119625604 |
|         | 1.28071397                                                                                      | 1.251908274 | 1.292961487 | 1.262284299 | 1           | 1.220420136 |             |
|         | 1.625303171                                                                                     | 1.528038541 | 1.213907849 | 1           | 1.260746101 | 2.623654929 |             |
|         | 1.149090538                                                                                     | 1           |             |             |             |             |             |
|         | 0.4847775                                                                                       |             |             |             |             |             |             |
|         |                                                                                                 | 0.999962573 |             |             |             |             |             |

YNL048W "YNL048W::ALG11::Specifies addition of the terminal alpha 1,2-Man to the Man5GlcNAc2-PP-dolichol N-Glycosylation intermediate" 1 1.029446013  
0.853457449 1.123471392 1.108164707 1 1.02564981 1.14715028  
1.100452033 0.837184878 1 0.950206251 0.819003484 0.68724395  
0.916871612 1 1.435649456 1.031088808 1.032667141 0.844513619 1  
1.163838515 1.065934806 0.888099555 1 1.192169377 1.23070572  
1.09730069 1.170492395 1.011044431 1 0.87888291 1.033562061  
0.852779206 0.713431042 1.000623372 1 1.225774156 1.147026223  
1.089285723 1.121258954 0.942171402

YAR043C YAR043C 1 1.081163514 0.944346202 1.166287097 0.966927477 1  
1.148527987 1.05149101 1.061327036 1.074510762 1 1.23398541  
1.304161536 0.886571936 1.140147588 1 1.140905001 1.114919285  
1.226309714 0.978953924 1 0.929863045 0.716701977 0.581406282  
0.697658375 1 1.499644857 1.222106862 1.576690745 1.517070868  
1.327206123 0.80966377 0.641372714 0.667303863 1.047485954  
0.792398474 1 0.790522316 1.022156112 0.703436236 0.866622859  
1.328321573

YNL050C YNL050C::YNL050C::molecular\_function unknown 1 0.504356638  
0.787184532 0.714096559 1.078372341 1 0.591436338 0.612555129  
0.835188376 0.926750517 1 0.431282723 0.515227311 0.706677754  
0.800667202 1 0.470646139 0.403037683 0.461607326 0.59935948 1  
1.278657992 1.239676798 1.192654506 1 0.737250768 0.676944416  
0.534138571 0.52206258 0.886546729 1 0.763915272 1.067825981  
1 0.836053687 1.306112374 1.398210048 1.41725628  
1.04024128

YAR047C YAR047C::YAR047C::molecular\_function unknown 1 1.247298413  
1.30303402 0.990586315 1 1.230601632 1.241289792 1.000255091  
1.131173794 1 1.363864528 1.149637041 0.955246621 1.138641035  
0.574251757 0.900533335 0.374081348 0.331787591  
1 0.967347334 1.063700562  
1 1.098725921 1.453689457 1.04199261

YAR052C YAR052C 1 1.228646142 0.961107882 1.129244716 0.811431782 1  
1.169159255 1.128067334 1.087565283 0.963420264 1 1.315831813  
1.187379545 1.295360656 1.080289868 1 1.279188994 0.814279415  
1.536764417 1.321587677 1 1.163106582 1.425325245 0.925052802 1  
1.058325349 1.437490289 1.343777157 1.042165957 0.817271316  
0.910335479 1.302831304 1.113993027 1 0.745595076  
0.932271357 1.190155888 0.776678509

YAR060C YAR060C::YAR060C::not yet annotated 0.944397153 0.797172586  
0.854263542 0.836039499 0.77545766 0.787038096 0.818996203  
0.896990229 0.913867512 0.752556497 0.804728984  
1 0.875873331 1.135386403  
1.097442722 0.738247482 1 0.788358163 0.821584879 0.737941477  
1 0.916483792 1.187196348

YBL005W YBL005W::PDR3::Zinc-finger transcription factor related to Pdr1p 1  
1.005466573 0.901456184 0.98977008 0.985442286 1 0.988678133  
0.93460591 0.938285756 0.859042154 1 1.002396772 1.011769543  
0.965080143 0.822126148 1 1.125494368 1.066111008 1.029810274  
0.836750154 1 1.150567271 1.312372875 0.970799689 0.955052678 1  
0.963967952 0.960019489 0.860852657 0.827549001 0.9272257 1  
0.947798158 0.907779548 1.074805678 0.836923239 1.373793478 1  
0.912365147 1.016858553 0.848862228 0.626145241 0.921369435 1.125176811

YBL005WB YBL005WB 1 1.155274857 1.21850625 1.603131553 1.086767445 1  
1.333415586 1.257907172 1.173379294 1.069284539 1 1.648411715  
1.454134023 0.979161011 1.438000785 1 1.165333259 1.496405998  
1.085207935 0.722274998 1 0.422777179 0.382536625 0.692069641 1  
1.002767902 0.943671538 1.03237053 1.157507487 0.897099607 1



0.980055139 1.273359594 1.725697374 2.468542111 1.479777622 1  
 1.229785849 1.791165319 2.016160313 1.019827886 1.154847171 1.098908116  
 YBL007C "YBL007C::SLA1::Involved in assembly of cortical actin cytoskeleton,  
 contains 3 SH3 domains, interacts with Beelp" 1 1.130359659 1.334133736  
 1.356908855 0.925724233 1 1.3500021 1.315613814 1.200711282  
 0.904764155 1 1.290483789 1.639198892 1.129565035 1.217609373  
 0.955845286 0.987898747 0.82091629 1 1.699879512 2.256215769  
 1 0.969459436 0.983371136 1.126261257 1.028841183 0.797179705 1  
 0.919307446 0.740791324 0.903936772 0.884459874 0.476251556 1  
 0.891469754 0.755694475 0.974592083 0.545942776 0.874966509 0.744280421  
 YBL009W YBL009W::YBL009W::molecular\_function unknown 1 0.847675255  
 0.72867305 0.898218196 0.566565457 1 1.075108964 0.915500154  
 0.639012279 0.74443909 1 0.835339431 0.82319569 0.361377511  
 0.808777871 0.867333279 0.931734592 0.715155454 1  
 0.62665102 0.780155896 0.715857989 1 0.997516981 0.713358043  
 1.028400173 0.949162981 0.97398991 1 0.799844894 0.597930656  
 0.5035624 0.6169056 0.531563007 1 0.679352786 0.705928765  
 1.065246052 0.680602571 0.71381048 0.906270811  
 YGR177C YGR177C::ATF2::Alcohol acetyltransferase 1 1.044817168  
 0.771465912 1.030108894 0.579848385 1 1.120769123 1.017744444  
 0.81651315 0.819574247 1 0.606131514 0.602106875 0.485953999  
 0.726561426 1 0.362871707 0.930838726 0.57277018  
 1 0.756752788 0.682815242 1.492422305 2.549946587  
 1.309179715 1 0.474908496 0.253082847 0.553485623 1.701527597  
 0.873136454 1 0.583857189 0.428763521 1.615581012 0.645339958  
 0.570272805 0.61556368  
 YGR179C YGR179C::OKP1::Outer Kinetochore Protein 1 1.1625829  
 1.131933053 1.422082654 1 1.008582553 1.118623696 1.23919146 1  
 1.026394559 1.180415034 1.215755977 1.4698736 1 1.41662103  
 0.861213964 0.879023592 0.847513559 0.802881236 0.464206203 1  
 0.982027132 0.901773688 0.758737856 1.197223048 1 1.247780963  
 1.336893798 0.741988225 0.85604929  
 1.176429 0.93253961  
 YGR181W YGR181W::TIM13::Translocase of the inner membrane; mitochondrial  
 intermembrane space protein mediating import and insertion of polytopic inner  
 membrane proteins 1 1.286871451 1.657084812 0.992322081 1.522984017 1  
 1.263566291 1.090238515 1.697168613 1.78243038 1 1.122465766  
 1.148350386 2.032022197 1.118739832 1 1.28067242 0.925853441  
 0.89435113 1.38463147 1 1.622785347 2.038347541 2.328566465  
 1.398835816 1 0.958446065 0.934874281 0.710912996 0.772141266  
 0.907828517 1 0.809817486 1.038330038 1.002889784 1.060726871  
 1.71491956 1 0.836648162 1.010311982 0.92324393 1.082463342  
 1.274255614 1.350212256  
 YGR183C YGR183C::QCR9::7.3 kDa subunit 9 of the ubiquinol cytochrome c  
 oxidoreductase complex 1 1.225063643 1.468729762 0.883663188 1.59648706 1  
 1.193700024 1.362857025 1.23471788 1.248711294 1 0.904697076  
 1.007444365 1.821449937 0.913557095 1 1.466548524 1.320371977  
 1.469633621 2.110058514 1 2.050675918 1.62666109 3.274891101  
 2.283027324 1 0.651532674 0.465618218 0.37690795 0.672703648  
 0.964756429 1 0.433671339 0.460666719 0.329479537 0.517599124  
 1.773976147 1 0.615472466 0.799709917 2.148702498 1.981163378  
 1.499943964  
 YGR185C "YGR185C::TYS1::tyrosyl-tRNA synthetase, cytoplasmic" 1  
 1.144011549 0.975872616 0.988963946 0.852845848 1 1.093853997  
 1.340876532 0.921409459 0.915782376 1 0.983875646 0.912404872  
 0.656104488 0.948659242 1.920997723 1.379121523 1.251278665  
 0.954457514 1 1.18127197 0.503400554 0.922664337 1

0.880448523 0.836007466 0.800360567 0.870614355 0.809682182 1  
0.932083406 0.949776516 0.730753708 0.673721569 0.85011791 1  
1.041952705 1.072385288 0.910176085 1.053170496 0.81764483 1.171584964  
YGR187C YGR187C::HGH1::HMG1/2 homolog 1 1.083241851 0.854488909  
1.077287019 1.029893543 1 0.878988357 0.760012503 0.938725049  
1.111754895 1 0.679346029 0.546590066 0.553834379 1  
0.441823936 1 0.404269815 0.317445648  
0.565139496 1 0.633381339 0.676243417 0.583143134 0.806783773  
0.80993457 1 0.721246237 0.914893872 0.636958445 0.946140496  
1.379484549 1 0.550248947 0.799933158 0.788952844 1.023949596  
0.551890385 1.056878183  
YGR201C YGR201C::YGR201C::molecular\_function unknown 1 1.35224917  
1.380397764 1.213439127 1.85880343 1 1.085405038 1.100849034  
1.872793063 1 1.19853198 1.512697233 2.966002259 1.984675558 1  
1.757994346 2.754071463 1 1.57437948 2.411158053  
3.804445202 3.350059257 1 1.054821121 1.304597889 1.352247385  
1.232028615 0.988063569 1 0.841909366 1.354472116 1.588991613  
1.537221682 1.422775198 1 1.220112597 1.288559296  
1.273157293  
YGR203W YGR203W::YGR203W::molecular\_function unknown 1 1.548340521  
1.426389514 0.721130884 1.129885624 1 1.118500797 1.094029963  
1.184457766 1.090650643 1 1.430518528 1.397238938 1.952502417  
1.150629819 1 1.143185821 0.876073897 1.13707531 1  
1.408336876 1.472590247 1.408430659 1 1.139229589 0.997000274  
1.125744337 1.363202439 1.004630883 1 0.73595232 1.058686707  
0.986112811 1.21182961 1.706724648 1.006196788  
0.726041768 1.557591997 1.342331585  
YGR205W YGR205W::YGR205W::molecular\_function unknown 1 0.762220627  
1.262328283 1.369657924 0.813857196 1 1.116848006 1.602362813  
1.136360414 0.990480631 1 1.289954865 1.510250781 2.23055515  
0.96837189 1 2.726319572 2.184469825 2.190018684 0.798084914 1  
1.954856781 1.490208637 1.84433539 1.158276505 1 0.95334612  
1.260062877 1.144271883 1.078444629 1 1.106639427 0.597769143  
1.501160057 1.885050489 0.71434591 1 1.111422549 0.687713528  
0.923448406 0.525632554 1.562838138 0.665474232  
YGR207C YGR207C::YGR207C::not yet annotated 1 0.863272575 1.304769899  
1.062563434 1.486335449 1 0.899139151 0.927060766 1.378877463  
1.177434541 1 0.999910918 1.280324023 1.413074963 1.114475364 1  
2.259625141 1.816755132 1.048650743 1.468025832 1 2.538121718  
1.979238102 2.13751647 2.275201914 1 0.913415635 1.254444082  
0.734635156 0.629812886 0.94802419 1 1.095231534 1.747008443  
1.382869153 1.30214646 2.88132874 1 1.387353285 1.79628975  
0.984286561 1.945277902 2.450488552 1.837934756  
YNL052W "YNL052W::COX5A::One of two genes (COX5A and COX5B, both nuclear-  
encoded) coding for subunit V of cytochrome c oxidase; COX5A gene product is the  
predominant form of subunit V found in holocytochrome c oxidase under normal  
growth conditions" 1 1.446844335 1.578157374 1.144808168 1.616319977 1  
1.330154661 1.563509238 1.437508542 1 0.809968669 0.846946917  
1.199327407 0.692896034 1 0.684213987 0.374907606 0.473525511  
0.720269899 1 1.378355372 0.627533298 1.247344923 1.53118502 1  
0.463886283 0.392332113 0.816922497 0.616397352 1 0.316523781  
0.174771485 0.128623417 0.314483835 0.806054679 1 0.477162084  
0.232774851 0.667986504 1.395258161 1.523492458 0.959683866  
YNL066W YNL066W::SUN4::Protein involved in the aging process. Related to  
glucanases. 1 1.24403396 0.707534908 1.220796975 0.659968068 1  
1.189690538 0.931773758 0.687718199 0.914733116 1 1.054096319  
0.725887056 1.360902141 0.783834154 1 0.561338984 0.27433713

|             |                                                                                                                            |             |             |             |             |             |   |
|-------------|----------------------------------------------------------------------------------------------------------------------------|-------------|-------------|-------------|-------------|-------------|---|
| 0.485311117 | 0.345178551                                                                                                                | 1           | 0.207126833 | 0.185321712 | 0.120731926 |             |   |
| 0.26037474  | 1                                                                                                                          | 0.811923979 | 0.527640185 | 0.982827148 | 1.385749447 |             |   |
| 0.614646321 | 1                                                                                                                          | 0.496399541 | 0.583855691 | 0.899577732 | 0.446406259 |             |   |
| 0.36924513  | 1                                                                                                                          | 0.701828871 | 0.509902531 | 0.878649289 | 0.575087815 |             |   |
| 0.665245914 | 0.661971729                                                                                                                |             |             |             |             |             |   |
| YNL068C     | YNL068C::FKH2::Fork Head homolog two                                                                                       | 1           | 0.884658851 |             |             |             |   |
| 0.818221441 | 0.946377023                                                                                                                | 0.843310664 | 1           | 1.110131402 | 1.14656734  |             |   |
| 0.773791745 | 0.787680856                                                                                                                | 1           | 0.929719179 | 0.796755693 |             | 1           |   |
| 0.650747122 | 0.655003421                                                                                                                | 0.547727415 |             | 1           |             |             | 1 |
| 0.910189841 | 0.822412074                                                                                                                | 0.846606558 | 0.832038981 | 0.929943767 | 1           |             |   |
| 0.749403144 | 0.616491343                                                                                                                | 0.773972648 | 1.139152506 | 0.73999431  | 1           |             |   |
| 0.644195422 | 0.726935044                                                                                                                | 1.344247382 | 0.573466046 | 0.865999887 | 0.672479238 |             |   |
| YNL070W     | YNL070W::TOM7::Involved in mitochondrial protein import                                                                    | 1           |             |             |             |             |   |
| 1.117549282 | 1.871951193                                                                                                                | 1.027330783 | 1.741590342 | 1           | 1.255873562 |             |   |
| 1.003046517 | 1.468597709                                                                                                                | 1           | 1.18671337  | 1.234301722 | 2.145682294 |             |   |
| 1.242068657 | 0.466288704                                                                                                                | 0.316176819 | 0.335682679 | 0.459349854 | 1           |             |   |
| 1.741187947 | 2.522828427                                                                                                                | 1.667303431 | 1.148921302 | 1           | 1.007239822 |             |   |
| 1.200364995 | 0.601215215                                                                                                                | 0.752920558 | 1.049674849 | 1           | 0.94291205  |             |   |
| 2.010567709 | 1.35954452                                                                                                                 | 1.059661696 | 2.156647691 | 1           | 0.887540382 |             |   |
| 1.601848202 | 1.047646403                                                                                                                | 1.608318554 | 1.279519968 | 1.792402268 |             |             |   |
| YNL072W     | "YNL072W::RNH35::RNase H(35), a 35 kDa ribonuclease H"                                                                     | 1           |             |             |             |             |   |
| 0.829204046 | 0.792242552                                                                                                                | 0.427916642 | 1           | 0.731042185 | 0.827584957 |             |   |
| 0.604683722 | 0.635220845                                                                                                                | 1           | 0.699776238 | 0.810882396 | 1           |             |   |
| 0.782245683 | 1.050901187                                                                                                                | 0.548672043 | 0.736607776 | 1           | 0.549389986 |             |   |
| 0.317221343 | 0.461817112                                                                                                                | 1           | 1.185622214 | 0.926786582 | 1.135630306 |             |   |
| 1.134179158 | 0.97165871                                                                                                                 |             | 1.028387005 | 1.232704125 | 1.052104605 |             |   |
| 1.089707381 | 1                                                                                                                          | 0.795715278 | 0.871453335 | 0.425874121 | 0.883065482 |             |   |
| 0.966688872 |                                                                                                                            |             |             |             |             |             |   |
| YNL074C     | YNL074C::MLF3::Protein of unknown function                                                                                 | 1           | 1.254121824 |             |             |             |   |
| 0.885666933 | 0.982388676                                                                                                                | 1           | 0.653170099 | 0.801963335 | 1           |             |   |
| 1.476008993 | 1.488629934                                                                                                                | 1.020203685 | 1.040125247 | 1           | 1.570285814 |             |   |
| 1.561548296 | 0.796291951                                                                                                                | 1           | 0.711907869 | 0.620858427 | 0.624077141 |             |   |
| 0.638790232 | 1                                                                                                                          | 1.318147996 | 1.302848381 | 1.066508069 | 0.897514967 |             |   |
| 0.597761813 | 1                                                                                                                          | 0.9743413   | 1.036853131 | 1.25658958  | 0.855046912 |             |   |
| 0.674789293 | 1                                                                                                                          | 1.716245173 | 1.730644703 | 1.130437209 | 0.940516821 |             |   |
| 1.245931964 | 0.770549116                                                                                                                |             |             |             |             |             |   |
| YNL076W     | YNL076W::MKS1::Pleiotropic regulatory factor involved in Ras-CAMP and lysine biosynthetic pathways and nitrogen regulation | 1           | 0.929185227 |             |             |             |   |
| 1.049065417 | 1.00441752                                                                                                                 | 0.857997489 | 1           | 0.967860557 | 0.999240039 |             |   |
| 0.935069693 | 0.789290391                                                                                                                | 1           | 0.986375557 | 1.154914847 | 0.844146262 |             |   |
| 1.078123341 | 1                                                                                                                          | 1.332516647 | 0.866888569 | 0.928556257 | 1           |             |   |
| 1.100471831 | 0.716990747                                                                                                                | 0.962662311 | 0.648585178 | 1           | 0.942606078 |             |   |
| 0.969052447 | 0.888298743                                                                                                                | 0.772284134 | 1.105031571 | 1           | 0.981235929 |             |   |
| 0.799568801 | 0.987177714                                                                                                                | 1.110488738 | 0.809793904 | 1           | 1.012441041 |             |   |
| 0.734273206 | 1.086448106                                                                                                                | 0.639886379 | 0.95079543  | 0.948300744 |             |             |   |
| YBL011W     | YBL011W::SCT1::High copy suppressor of choline-transport mutants                                                           | 1           |             |             |             |             |   |
| 0.925924782 | 0.897390563                                                                                                                | 0.850907507 | 0.507877635 | 1           | 0.9411765   |             |   |
| 1.124376142 | 0.71984608                                                                                                                 | 1           | 1.024030763 | 0.941671208 | 0.634924664 |             |   |
| 0.789869994 | 1                                                                                                                          | 1.14524861  | 0.860335423 | 0.952519056 | 0.721937136 | 1           |   |
| 0.988951355 | 1.074870817                                                                                                                | 0.659977705 | 0.975968973 | 1           | 0.946936158 |             |   |
| 0.931414369 | 1.069930131                                                                                                                | 1.228684737 | 0.916088607 | 1           |             |             |   |
| 0.653371012 | 0.621669717                                                                                                                | 0.52604815  | 1           | 0.911730054 | 0.612798752 |             |   |
| 0.902417057 | 0.581284002                                                                                                                | 0.747153383 | 0.851106531 |             |             |             |   |
| YNL090W     | YNL090W::RHO2::Gtp-binding protein of the rho subfamily of ras-like proteins                                               | 1           | 1.267582648 | 1.188712219 | 1.006853863 | 1.145605699 | 1 |
| 0.92607804  |                                                                                                                            | 1.283622869 | 1           | 1.074634469 | 1.097166257 | 1.230423198 |   |
| 1.343371284 | 1                                                                                                                          | 0.971592815 | 0.7934212   | 0.789721494 | 1.016380189 | 1           |   |

|             |                                                                                                  |             |             |             |             |
|-------------|--------------------------------------------------------------------------------------------------|-------------|-------------|-------------|-------------|
| 1.180238743 | 1.117867343                                                                                      | 1.024696898 | 0.931755374 | 1           | 0.945884737 |
| 0.985566916 | 1.113338611                                                                                      | 0.881111491 | 0.970954259 | 1           | 1.114925842 |
| 1.252489073 | 1.169299009                                                                                      | 1.124104155 | 1.01951964  | 1           | 1.139938439 |
| 1.19704787  | 1.006718549                                                                                      | 0.927246405 | 0.905555609 | 0.999962573 |             |
| YBL013W     | YBL013W::FMT1::Formyl-Methionyl-tRNA Transformylase (consistent with name of bacterial homologs) |             |             |             |             |
| 1.28207905  | 1                                                                                                | 1.463346003 | 1.948300606 | 1.238018386 | 1.329494361 |
| 1.931408307 | 1.799655945                                                                                      | 1.076020477 | 1.53882131  | 1           | 0.809595017 |
| 0.913655644 | 0.805332221                                                                                      | 1           | 0.990594204 | 0.813627174 | 0.638301607 |
| 0.756765624 | 0.906230739                                                                                      | 1           | 0.878612359 | 0.736283527 | 1.028563517 |
| 0.554357618 | 0.89566542                                                                                       | 0.61293679  |             |             |             |
| YNL092W     | YNL092W::YNL092W::molecular_function unknown                                                     |             |             |             |             |
| 1.432260833 | 1.579368103                                                                                      | 1.331220864 | 1           | 1.379705425 | 1.574241391 |
| 1.355529321 | 1.277481262                                                                                      | 1           | 1.362352864 | 2.167584834 | 1.827767339 |
| 1.404685439 | 1.456570593                                                                                      |             | 1.002744372 | 0.876065496 | 1           |
| 1.640779237 |                                                                                                  | 0.910726253 | 1.011520678 | 1.324537375 | 0.927864152 |
| 0.953044504 | 1                                                                                                | 1.073488461 | 1.089643345 | 1.687404813 | 1.226134316 |
| 0.712003291 | 1                                                                                                | 1.142979395 | 1.003054811 | 1.227037914 | 0.222774896 |
| 1.109155763 | 1.565615701                                                                                      |             |             |             |             |
| YBL027W     | YBL027W::RPL19B::Homology to rat L19                                                             |             |             |             |             |
| 1.270024582 | 0.981399767                                                                                      | 1.609901718 | 1           | 1.005731101 | 1.066020011 |
| 1.29552631  | 1.486344801                                                                                      | 1           | 0.911377611 | 1.086488525 | 1.00311174  |
| 1.03040542  | 1                                                                                                | 0.813794197 | 0.398464359 | 0.288477993 | 0.603710576 |
| 1.446262841 | 1.013950376                                                                                      | 0.576936842 | 0.934799258 | 1           | 0.985464384 |
| 1.05190317  | 0.827008917                                                                                      | 0.829277926 | 0.911451056 | 1           | 1.549401656 |
| 1.213399731 | 1.010733708                                                                                      | 2.509553624 | 1           | 1.083664117 | 1.242573883 |
| 0.902849679 | 1.533075822                                                                                      | 1.023456271 | 1.161077402 |             |             |
| YNL094W     | YNL094W::APP1::Actin Patch Protein                                                               |             |             |             |             |
| 0.602633728 | 1                                                                                                | 0.752963699 | 0.709166901 | 0.543055214 | 0.652919372 |
| 0.756471976 | 0.723919868                                                                                      | 0.611166602 | 0.853619456 | 1           | 1.072543879 |
| 1.114777862 | 0.983768883                                                                                      | 0.625459608 | 1           | 0.571098415 | 0.490074744 |
| 0.384996841 | 0.532589093                                                                                      | 1           | 1.130275682 | 1.233478549 | 1.254032736 |
| 1.106532804 | 0.972524468                                                                                      |             | 0.946600178 | 1.027169922 | 1.025609821 |
| 0.883065777 | 0.675006096                                                                                      | 1           | 1.05197678  | 1.054227587 | 0.912733251 |
| 0.456508264 | 0.816588361                                                                                      | 0.915027042 |             |             |             |
| YBL029W     | YBL029W::YBL029W::molecular_function unknown                                                     |             |             |             |             |
| 1.705945334 | 1.311320247                                                                                      | 2.200522356 | 1           | 1.099838198 | 1.235349114 |
| 1.511431605 | 1.609905721                                                                                      | 1           | 1.242009505 | 1.404828109 | 1.860967607 |
| 1.449268892 | 1                                                                                                |             | 1.318388985 | 1.646475861 | 1           |
| 1.26031364  | 1.31688065                                                                                       | 1           | 0.822786822 | 1.182165531 | 0.70805857  |
| 0.78043264  | 0.956919089                                                                                      |             | 0.921603845 | 1.141570416 | 1.005886547 |
| 1.207287701 | 2.878665078                                                                                      | 1           | 0.873968479 | 0.920967305 | 1.034414149 |
| 1.161824618 | 1.596798004                                                                                      | 1.406252097 |             |             |             |
| YBL031W     | YBL031W::SHE1::Product of gene unknown                                                           |             |             |             |             |
| 1.304769784 | 1.592899463                                                                                      | 1.287746436 | 1           | 1.227898296 | 1.397144423 |
| 1.287998008 | 1.23378002                                                                                       | 1           | 1.037179493 | 1.182632581 | 1.317332728 |
| 1.375341238 |                                                                                                  |             |             | 0.395816784 |             |
| 1           | 0.939340691                                                                                      | 0.938068429 | 0.737370156 | 0.861917579 | 0.92140132  |
| 0.856865803 | 0.832234826                                                                                      | 0.724665015 | 0.9822224   | 1.522301452 | 1           |
| 0.986684923 | 1.030312668                                                                                      | 1.142886891 | 0.687111032 | 1.492927068 | 0.879126451 |
| YBL033C     | YBL033C::RIB1::First step in the riboflavin biosynthesis pathway                                 |             |             |             |             |
| 1.322926162 | 1.334389406                                                                                      | 1.153007765 | 1.083582587 | 1           | 1.157862976 |
| 1.382406619 | 1.212350359                                                                                      | 1           | 1.512070022 | 1.611026053 | 1.604560663 |
| 1.280744029 | 1                                                                                                | 1.592230534 | 1.370069794 | 1.219972863 | 1           |
| 1.476208317 | 2.05991018                                                                                       | 1.346588254 | 1.14737197  | 1           | 1.680279467 |
| 1.760110877 | 1.339312592                                                                                      | 0.808992813 | 0.953325636 | 1           | 1.721179735 |

1.900910844 2.24583988 1.509335509 1.092745194 1 1.854096495  
1.476427785 1.421687642 0.883289974 1.346345062 1.225873579  
YBL035C "YBL035C::POL12::Required for DNA synthesis and correct progression  
through S phase; plays an essential role at early stage of chromosomal DNA  
replication, before the hydroxyurea-sensitive step" 1 0.947903773  
0.914929789 1.036607672 0.836249858 1 0.937880247 0.93404213  
0.938735412 0.907534627 1 0.967452515 0.894391186 1.045259997  
0.916045533 1 0.993458134 0.864215533 0.896779954 0.903230584 1  
0.978876284 0.575686779 0.600093997 0.768367381 1 0.908420965  
0.783770495 0.999418447 0.864588083 1.061893653 1 0.978067223  
0.815722146 0.960325366 1.056510604 0.699096984 1 0.874626265  
0.806726604 1.048111362 0.614576755 0.880350415  
YBL037W YBL037W::APL3::clathrin Associated Protein complex Large subunit 1  
1.178481239 1.079225961 1.286606292 0.949693141 1 1.518876162  
1.552933071 1.058621019 0.842258524 1 1.192343299 1.409308064  
0.906068745 1.104531793 1.290011295  
0.728768527 0.450073481 1 0.902792661 0.834072678  
0.734579819 0.860372639 0.870723914 1 0.843248012 0.678915692  
0.588459474 0.740906399 0.729513561 1 0.928348876 0.775248934  
0.96501514 0.450829058 1.208657045 0.974569543  
YBL051C YBL051C::PIN4::[PSI+] induction 1 0.871760035 0.946837528  
1.167250729 0.922036456 1 0.98864955 0.89792988 0.800393298  
0.679486813 1 0.953163662 0.971667776 0.821931411 1.008356062  
1.249951639 1.110924776 0.78392042 1 0.629292509 0.5536995  
0.463841534 1 1.03751604 0.857488282 0.823445528 0.757108113  
0.588762358 1 1.163287029 1.22359559 1.682034289 1.334149979  
0.780686718 1 1.350019978 1.226255023 1.131634896 0.702521959  
1.294236964 0.62957364  
YBL053W YBL053W::YBL053W::molecular\_function unknown 1 0.848105534  
1.370701425 1.054689048 1.525886851 1 0.944277394 0.881354628  
1.357984518 1.384267499 1 0.908911966 0.886278778 1.272356131  
1.189914729 1 0.738934379 0.35049062 0.719957352 1  
1.358113311 1.458680003 1.12428019 0.678800298 1 0.733089817  
0.713742822 0.427674524 0.521726841 0.809420532 1 1.213298493  
1.351753862 0.982992148 1 1.139910994 1.396861823  
0.759796506 2.041896018 1.185594872  
YGR209C YGR209C::TRX2::thioredoxin 1 1.672025952 1.725438818  
1 1.829925457 1 1.216728146 1.529361364  
1.523740531 0.508740986  
1 1.858318694 3.519158368 3.650993904 0.719767326 0.724441445 1  
2.156084165 9.487820787 7.757744864 2.424270832 1.979904859 1  
1.829381965 5.030153406 3.509189469 0.993623164 1.523608816 2.522672781  
YGR211W YGR211W::ZPR1::Involved in nucleolar function; similar to murine  
ZPR1 protein 1 0.672989343 0.646844244 0.831519111 0.508115236 1  
0.654341897 0.706567332 0.714467788 0.724237844 1 0.484078784  
0.45770572 0.307552414 0.759192387 1 0.407819863  
0.471302529 1 0.708953804 1 0.959478303  
0.689212269 0.866593279 1.051903439 0.794688479 1 1.390130493  
0.45360437 0.331578475 0.533932281 0.433596 1 0.843420765  
0.449360462 0.618055929 0.643291271 0.693494204  
YGR225W "YGR225W::AMA1::Required for sporulation, highly induced during  
sporulation; activator of meiotic anaphase promoting complex" 1  
1.158983668 1.666771842 1.371468429 1.467895568 1  
1.349432218 1.186758963 1 1.048434767 1.29006042 1.389828874 1  
1 1.692995335  
2.800450447 2.984996972 0.826643366 0.801331997 1 1.673856769

5.88116958 5.322512471 1.923554632 1.665826762 1 1.560464506  
5.159814535 2.873453318 1.086764282 1.113653552 2.178552439  
YGR227W YGR227W::DIE2::De-repression of ITR1 Expression 1 1.594470068  
1.331591051 1.350006729 1.170783902 1 1.351115195 1.506031629  
1.06312256 1.033481498 1 1.570431689 1.409988845 0.953940169  
1.123577796 1.138308514 0.540492516  
1 1.018659264 0.850382594 0.871103539 1.13328322 0.935642581 1  
0.980315624 1.120445857 0.974778192 0.806452201 0.784042287 1  
0.751049737 0.740718 0.880429472 0.860453291 0.633746143 0.876499665  
YGR229C "YGR229C::SMI1::Protein involved in (1,3)-beta-glucan synthesis,  
possibly through regulation of cell wall glucan and chitin synthesis; chromatin  
binding protein" 1 1.02226518 1.098462558 1.471883689 1.173459498 1  
1.206545266 1.112853949 1.110222919 1.212554958 1 0.91922245  
0.964758467 0.789308448 1.477812667 1 0.573163439 0.935623963  
0.590042948 0.644849742 1 0.726437876 1.141401282 1.077626012  
0.830656393 1 0.914392862 0.826024952 0.810326285 0.777970829 1  
0.858102217 1.235929335 0.944846846 1.055613347 1 1.166283707  
1.232841935 0.861482182 1.207485451  
YGR231C YGR231C::PHB2::Possible role in aging 1 0.983448565  
1.210929301 1.280722033 1.25562628 1 1.017455561 1.271539825  
1.387778649 1.305339959 1 1.115081138 1.363107156 1.637661146  
1.021791205 1 1.897170667 1.384616761 1.604134651 1.51906634 1  
1.737218867 1.562594855 2.497372518 1.923004961 1.136695947  
1.544432853 1.237649374 0.840604169 0.944432653 1 1.192242458  
1.709523018 1.238039336 0.869725245 1.131580614 1 1.370517073  
1.811199192 1.127699087 1.231505882 1.471307174 1.61202375  
YGR233C YGR233C::PHO81::Positive regulatory protein of phosphate pathway  
0.967791598 0.906499132 0.969432564 0.828207789 0.989164742  
0.96108425 0.660400849 1.339457082 1.657442572 0.833187557  
1.008358642 1 1.539755141 1 1.348693899  
1 1.041324037 0.993187996 1.229935538 1.137903136 1.177302829 1  
0.995637346 0.922123302 0.812509766 0.934834178 0.678004795 1  
1.065564402 1.024946582 1.237397129 1.070921723 0.944221234 2.310771683  
YGR235C YGR235C::YGR235C::molecular\_function unknown 1 1.212584739  
1.206341159 0.976240448 1.338801682 1 1.014489256 0.949894873  
1.173272621 1.148429364 1 1.805922714 2.919249084 4.757997325  
2.471061158 1 1.305695975 0.963264662 0.965688506 1  
1.875661531 1.512570885 1.906686814 2.0802958 1 1.090838082  
1.389856479 1.206067888 1.225401733 1.489672415 1 1.110862665  
1.48449455 1.218961227 1.097270878 1.56592469 1 1.310209247  
1.728615768 1.065107101 1.71660427 2.73895189  
YGR249W YGR249W::MGA1::Mgalp shows similarity to heat shock transcription  
factor 1.004730173 1.035403195  
0.886411659 0.823952317 0.830680461 0.919156092 0.836056579  
1.010326 1.14989222 1.019068735 1 0.810128213  
1 0.760043924 0.971401474 0.894012128  
YGR251W YGR251W::YGR251W::molecular\_function unknown 1 0.774997909  
0.776155682 0.819249268 1.058102877 1 0.696568303 0.68162267  
1.020310492 1.079631141 1 0.668736689 0.581490436 0.584968262  
1.105302043 1 0.502517001 0.41995452 0.693296164 1  
1.076512297 0.70371092 0.718256761 1 0.990704799 0.962203857  
0.791912325 0.856849548 1.163459384 1 0.938168119 1.127871764  
0.766493397 1.131918407 1.262292987 1 0.856120542 1.103672289  
0.922890743 1.192536358 0.852857756  
YNL096C YNL096C::RPS7B::Homology to human S7 and Xenopus S8 1  
1.250166072 1.23904454 0.926157863 1.663607569 1 1.005431356

|             |                                                                                                                                                                                 |             |             |             |             |             |   |
|-------------|---------------------------------------------------------------------------------------------------------------------------------------------------------------------------------|-------------|-------------|-------------|-------------|-------------|---|
| 1.172531392 | 1                                                                                                                                                                               | 0.845285526 | 0.676013666 | 0.760598339 | 1.06724171  | 1           |   |
| 0.474751551 |                                                                                                                                                                                 | 0.163987619 | 0.391291693 | 1           | 0.95457482  | 0.760220852 |   |
| 0.457858113 | 0.948263484                                                                                                                                                                     | 1           | 0.933973967 | 0.789560172 | 0.755604401 |             |   |
| 0.848812195 | 0.770934799                                                                                                                                                                     | 1           | 1.011190868 | 1.452800509 | 0.936018631 |             |   |
| 0.875089091 | 1.783553493                                                                                                                                                                     | 1           | 0.919967773 | 0.997203083 | 0.894277715 |             |   |
| 1.240110385 | 0.974674583                                                                                                                                                                     | 1.372978396 |             |             |             |             |   |
| YNL098C     | "YNL098C::RAS2::Ras proto-oncogene homolog. Ras2 is involved in growth on non-fermentable carbon sources, the starvation response, sporulation, pseudohyphal growth and aging." |             |             |             |             |             |   |
|             | 1                                                                                                                                                                               | 1.129604742 | 1.184170774 | 1.171141582 |             |             |   |
| 1.224264892 | 1                                                                                                                                                                               | 1.278806555 | 1.197567396 | 1.170415753 | 1.15546734  | 1           |   |
| 0.972183905 | 1.317405387                                                                                                                                                                     | 4.357561479 | 1.291001918 | 1           | 1.298933696 |             |   |
| 0.920681456 | 0.998528096                                                                                                                                                                     | 1           | 1.841971999 | 1.11199885  | 1.557959675 |             |   |
| 1.391459124 | 1                                                                                                                                                                               | 0.992357733 | 1.144364193 | 1.39445431  | 0.934497115 |             |   |
| 1.343788719 | 1                                                                                                                                                                               | 1.215740024 | 1.135677926 | 1.757689628 | 1.265980616 |             |   |
| 1.196557743 | 1                                                                                                                                                                               | 1.339829186 | 0.909469491 | 1.311364268 | 1.101973674 |             |   |
| 1.395326976 | 1.051624402                                                                                                                                                                     |             |             |             |             |             |   |
| YNL100W     | YNL100W::YNL100W::molecular_function unknown                                                                                                                                    |             |             |             |             |             |   |
|             | 1                                                                                                                                                                               | 1.195378549 |             |             |             |             |   |
| 1.285174505 | 1.054938046                                                                                                                                                                     | 1.575526784 | 1           | 1.14221057  | 1.275979399 |             |   |
| 1.335290715 | 1                                                                                                                                                                               | 1.058923454 | 1.105436331 | 1.723810611 | 1.01422623  |             |   |
| 0.916755273 |                                                                                                                                                                                 | 0.574533782 | 0.697276633 |             | 0.81724526  |             |   |
| 0.868675623 | 0.579442414                                                                                                                                                                     | 1           | 0.885097169 | 1.0650147   | 0.750173284 |             |   |
| 0.69587721  | 0.863802403                                                                                                                                                                     | 1           | 1.034018314 | 1.053095352 | 0.992621852 |             |   |
| 0.831295538 | 1.480594279                                                                                                                                                                     | 1           | 0.963207279 | 0.965487605 | 0.913981171 |             |   |
| 1.137578604 | 1.642600179                                                                                                                                                                     | 1.138311158 |             |             |             |             |   |
| YNL114C     | YNL114C::YNL114C::molecular_function unknown                                                                                                                                    |             |             |             |             |             |   |
|             | 1                                                                                                                                                                               | 0.825144536 |             |             |             |             |   |
| 0.830733068 | 0.86747391                                                                                                                                                                      | 1.166923419 | 1           | 0.767600308 | 0.598636476 |             |   |
| 1.209700897 | 1.39307239                                                                                                                                                                      | 1           | 0.577747093 | 0.436276612 | 1.196872737 |             |   |
| 1.333005819 | 1                                                                                                                                                                               | 0.253427917 | 0.269101859 | 0.202488568 | 0.594770242 | 1           |   |
| 0.710383266 | 0.671384104                                                                                                                                                                     |             | 1.629137169 | 1           | 0.989586636 | 0.743972021 |   |
| 0.545429605 | 0.987941782                                                                                                                                                                     | 1.182209718 | 1           | 0.929568027 | 1.071991267 |             |   |
| 0.790520208 | 1.17284322                                                                                                                                                                      | 2.161111679 | 1           | 0.738665598 | 0.682170181 |             |   |
| 0.95184396  | 1.635622756                                                                                                                                                                     | 0.889130073 | 1.173336189 |             |             |             |   |
| YNL116W     | YNL116W::YNL116W::molecular_function unknown                                                                                                                                    |             |             |             |             |             |   |
|             | 1                                                                                                                                                                               | 0.884944615 |             |             |             |             |   |
| 0.700304384 | 0.705624991                                                                                                                                                                     | 0.672710126 | 1           | 1.222480772 | 0.904949194 |             |   |
| 0.702366921 | 0.681997892                                                                                                                                                                     | 1           | 0.953579302 | 0.666006954 | 0.94474694  |             |   |
| 0.963779923 | 1                                                                                                                                                                               | 0.523670017 | 0.307329449 | 0.639271895 | 0.770605051 | 1           |   |
| 0.593160013 | 0.602239605                                                                                                                                                                     | 0.737992039 | 0.951011444 | 1           | 0.891073578 |             |   |
| 0.849984945 |                                                                                                                                                                                 | 0.843968174 | 1           | 0.689549427 | 0.619181544 |             |   |
| 0.603659856 | 0.847006137                                                                                                                                                                     | 0.975668501 | 1           | 0.659317972 | 0.621141266 |             |   |
| 0.886134193 | 0.616944972                                                                                                                                                                     | 0.820518844 | 0.598926829 |             |             |             |   |
| YNL118C     | YNL118C::DCP2::Mrna Decapping. essential suppressor of the respiratory deficiency of a pet mutant                                                                               |             |             |             |             |             |   |
|             | 1                                                                                                                                                                               | 0.699781061 | 0.780084636 |             |             |             |   |
| 1.026814616 | 0.713802877                                                                                                                                                                     | 1           | 0.886604489 | 0.97143528  | 0.616210269 |             |   |
| 0.72761947  | 1                                                                                                                                                                               | 0.985510179 | 1.028850443 | 1.134831985 | 0.848092283 | 1           |   |
| 0.712356365 | 0.689424267                                                                                                                                                                     | 0.638172365 | 0.539969657 | 1           | 1.71133213  |             |   |
| 1.562830849 |                                                                                                                                                                                 | 2.143908733 | 1           | 0.835676616 | 0.898368111 | 0.813311661 |   |
| 0.791748109 | 0.918412278                                                                                                                                                                     | 1           | 0.886667874 | 0.714350646 | 0.92436201  |             |   |
| 0.794455848 | 0.861811749                                                                                                                                                                     | 1           | 1.113370061 | 1.015623258 | 1.176365477 |             |   |
| 0.819208365 | 1.190486143                                                                                                                                                                     | 0.662847393 |             |             |             |             |   |
| YNL120C     | YNL120C::YNL120C::molecular_function unknown                                                                                                                                    |             |             |             |             |             |   |
|             | 1                                                                                                                                                                               |             |             |             |             |             |   |
| 0.545041697 |                                                                                                                                                                                 | 0.634153477 | 1           |             | 0.678995741 | 1           |   |
| 0.576147458 | 0.509285293                                                                                                                                                                     |             | 0.846498903 | 1           | 0.598622751 | 0.628590903 |   |
| 0.603080689 | 0.571458251                                                                                                                                                                     | 1           | 0.843113545 | 1.109218327 | 0.620730474 |             |   |
| 0.714036476 | 1                                                                                                                                                                               |             | 0.534407802 | 0.66339019  | 0.849626809 | 0.949155181 | 1 |
|             | 0.473671656                                                                                                                                                                     |             | 0.569126924 | 0.75236386  | 1           | 0.711294979 |   |
| 0.890061704 | 0.280426269                                                                                                                                                                     | 0.738625264 | 0.997335787 |             |             |             |   |

YBL055C YBL055C::YBL055C::molecular\_function unknown 1 1.026093545  
0.993236042 1.088810569 1.177916075 1 1.15961368 0.93790707  
1.314419211 1.301286861 1 0.634483712 0.975631132 1.128569755  
1.249465927 1 0.639964111 0.622758075 0.617219662 1  
0.993947876 1.333589529 1 1.098319644 0.965859909  
1.102885008 0.96451163 1 0.927533722 0.815974117 0.964747015  
0.913891021 0.997209478 1.19596653 0.556477892 1.078785388  
0.783683463  
YNL122C YNL122C::YNL122C::molecular\_function unknown 1 0.809403948  
1.287275631 1.010842738 1.395372106 1 0.891334285 0.902197062  
1.326502216 1 0.901379251 1.276295277 1.48880021 1.142709794 1  
0.995452186 0.839108723 0.938896126 1.657265127 1 2.261702145  
2.466193176 3.082808182 1.510975814 1 1.187735336 1.3215804  
1.02593605 0.915484038 1.060687968 1 1.129616723 1.426129314  
1.149180911 1.132207198 2.079879748 1 1.530983305 1.849693988  
1.217035953 1.500155844 1.951012276 1.441277128  
YBL057C YBL057C::YBL057C::molecular\_function unknown 1 1.07482005  
1.15614147 0.996259496 1.124311999 1 0.947494729 0.979890349  
1.255359885 1.158531193 1 0.86317926 1.108445688 1.165228042  
1.071269033 1 0.853683691 0.679926412 0.842739377 1  
1.457345238 1.865708844 1.226529467 1.318582561 1 1.239253259  
1.307016514 1.113106012 1.01434537 0.981149901  
1.303927093 1.065036474 1.632009172 1 1.221241931 1.339701392  
1.102547342 1.079401677 0.996191847 1.318689781  
YNL124W YNL124W::NAF1::Nuclear Assembly Factor 1 1.043547651  
0.868878864 0.977742089 0.817472433 1 0.886514744 0.87391288  
0.945981212 1.009626307 1 1.00558519 0.67822619 1.166497714 1  
0.6172309 0.627268383 0.477082147 1 0.93268459  
0.617474732 0.382078974 1 0.692123586 0.496094062 0.694234881  
0.868201327 0.729013627 1 0.62795232 0.532411299  
0.794888175 1 0.463482 0.488955908 0.823441903 0.377142565  
0.789812857  
YBL059W YBL059W::YBL059W::molecular\_function unknown 1 1.235659843  
0.930810306 1.080960658 0.960189732 1 0.92273959 1.02142503  
0.962480095 0.924186371 1 1.131602158 1.135902514 1.141089475  
1.181714581 1 1.323087284 1.067744434 1.2022829 1.163053859 1  
1.248257932 1.074018739 1.328548484 1.372568463 1 0.928104965  
1.224550161 0.785947825 0.86802068 0.954059437 0.948773809  
0.793313563 1.057646787 2.022466389 1 0.968419715 1.172179706  
1.138595067 0.962749695 1.516494714 1.230251695  
YNL138W YNL138W::SRV2::N-terminal domain appears to be involved in cellular  
responsiveness to RAS. 1 0.894563265 0.862408509 0.827234886 0.714502566 1  
0.974231725 0.934048373 0.670504583 1 0.9971906 1.104331513  
1.068528887 0.892739534 1 1.306299198 1.370601859 1.458364491  
1.063569296 1 0.91920541 0.77606522 0.996025993 0.84953986 1  
1.04743511 1.111292652 1.617561677 1.109340713 0.878205186 1  
0.946785724 1.21903954 1.15116581 1.098054493 0.798209814 1  
0.809277453 1.063492571 1.01731751 0.722524557 0.974750933 1.004340689  
YBL061C "YBL061C::SKT5::protoplast regeneration and killer toxin resistance  
gene, may be a post-translational regulator of chitin synthase III activity,  
interacts with Chs3p" 1 0.983317401 1.093985234 1.038751611 0.975155621 1  
0.98198846 1.05514111 0.934924552 0.854080342 1 0.89925692  
0.88830685 0.683396135 1.040875466 0.85642118  
0.352742605 0.901284508 0.313094579 1 0.812903642 0.887234431  
0.87448953 0.817301139 0.889200479 1 0.950827699 0.731131438  
0.649684417 0.82261354 0.874501011 1 1.285671299 1.165908267  
1.371243629 1.207956798 1.101393062 0.769673503



YBL075C YBL075C::SSA3::heat-inducible cytosolic member of the 70 kDa heat shock protein family 1 1.2422098 1.06254578 1.47940757 0.953474556 1  
1.276857185 1.553756272 1.118198651 1.215709096 1 1.129239343  
1.521700024 1.692429138 1.19039425 1 2.370245492 3.304712806  
4.781909759 2.036781217 1 1.113269005 0.944292575 1.233364943  
1.376430585 1 0.890270272 0.754601115 1.138411406 0.799033454  
0.919104882 1 1.821822284 0.630209409 0.469799062 0.359868613 1  
1.672151923 1.052127432 0.873038653 0.571028079 0.985016643 0.631324918

YBL077W YBL077W::YBL077W::molecular\_function unknown 1 1.050863576  
1.147998458 0.733369869 1.210740357 1 0.812920453 0.666150435  
1.055681381 1.072202795 1 0.94294482 0.873700575 0.952437146  
0.742399599 1 0.506843773 0.452298849 0.511671877 1  
0.856745912 1.585100571 0.542408374 0.422500924 1 0.668939674  
0.635602391 0.547196968 0.564821494 0.505020512 1 1.389103005  
1.802338517 1.193321256 0.980718234 1.889681204 1 1.197435675  
1.856948172 1.119280299 1.995116827 1.065116839 1.126928036

YBL079W YBL079W::NUP170::Component of yeast nuclear pore complex; may play a role in localizing specific nucleoporins to nuclear pore complex; High identity with Sc nucleoporin NUP157 & to mammalian nucleoporin Nup155p. Complemented with Nup155p  
0.975179299 0.966856456 1.064475017 0.720521185  
1.123555552 1.219204036 0.877136761 0.758283898 1.050105462  
1.010119717 0.468594958 1.136606242

1

1.155373479 1 0.796650496 0.600485654 0.555614516  
0.576527799 0.491496622 1.703088726

YBL079W YBL079W::NUP170::Component of yeast nuclear pore complex; may play a role in localizing specific nucleoporins to nuclear pore complex; High identity with Sc nucleoporin NUP157 & to mammalian nucleoporin Nup155p. Complemented with Nup155p  
0.987190776 0.833883323 0.989109126 1.175100672 0.893718463  
0.860743219 1.028387005 0.769449601 0.872786755 1 0.714683196  
0.730008914 0.96427928 0.643788046 0.804698482

YBL081W YBL081W::YBL081W::molecular\_function unknown 1 0.987031448  
0.767796128 0.945930692 0.745291624 1 0.97933851 0.91415194  
0.711653946 0.754419096 1 0.9606319 0.72079458 0.677590689  
0.829785481 1 0.823305377 0.981238867 0.500127793 1  
0.64918032 0.740906673 0.662302347 0.80084204 1 0.531033277  
0.532283991 0.853156688 0.820368484 1 0.393639151 0.510797316  
0.532854661 0.89000808 0.490492573 1 0.486317601 0.426646884  
0.785933607 0.409264303 0.688240476

YBL083C YBL083C::YBL083C::molecular\_function unknown 1.387660417  
0.851835893 0.745974402 1.087233746 0.81280269  
0.90324992 0.915074692 0.796460923 1.147572865  
1 1.368228309 1.071917948  
1.290515461 1.384136191 1.023465112 1 0.639376546 1.425725193  
1.070636753 0.853146736 1.345203883 1 0.563503011 1.131120726  
0.690512154 0.759774353 0.720111901 1.078768762

YBL085W YBL085W::BOI1::Involved in bud growth 1.177110336  
0.945218921 0.989559199 0.830165702 0.803923361 0.751293305  
0.946421152 1.011177421  
1 1.29130489 1.0475099 1.029286527  
0.83562395 0.944167724 1 1.044837955 1.590976224 1.396265918  
0.960561431 0.792662783 1 0.594775095 0.709060719 0.538342782  
0.625874094 0.844977137

YBL085W YBL085W::BOI1::Involved in bud growth

|         |                                                                                                                                 |             |             |             |             |             |             |
|---------|---------------------------------------------------------------------------------------------------------------------------------|-------------|-------------|-------------|-------------|-------------|-------------|
|         |                                                                                                                                 |             |             | 1           | 1.098443353 | 1.84279807  |             |
|         | 0.823393585                                                                                                                     | 0.80154134  | 1           |             |             | 1           |             |
|         | 1.235892172                                                                                                                     | 1.63171354  |             | 0.72052518  |             | 2.897439829 |             |
| YNL140C | YNL140C::YNL140C::molecular_function unknown                                                                                    |             |             | 1           |             | 0.991636847 |             |
|         | 1.094141305                                                                                                                     | 1.034361627 | 1.135871523 | 1           | 0.989063484 | 0.950339117 |             |
|         | 1.229871042                                                                                                                     | 1.169601974 | 1           | 1.054527128 | 0.981792562 | 1.085911665 |             |
|         | 1.136922613                                                                                                                     | 1           | 1.158147121 | 1.039643137 | 0.967517696 | 1.007045624 | 1           |
|         | 0.751998844                                                                                                                     | 0.809695744 | 0.948798435 | 0.620122365 | 1           | 0.984157102 |             |
|         | 0.912406191                                                                                                                     | 0.884021236 | 0.821376607 | 0.714646675 | 1           | 1.088831316 |             |
|         | 1.006335388                                                                                                                     | 0.957667238 | 1.066651636 |             | 1           | 0.88457627  | 1.164939534 |
|         | 1.153929323                                                                                                                     | 0.728651401 | 1.01598376  | 1.195226768 |             |             |             |
| YNL142W | YNL142W::MEP2::belongs to a ubiquitous family of cytoplasmic membrane proteins that transport only ammonium (NH(4)(+) + NH(3)). |             |             | 1           |             |             |             |
|         | 0.825372767                                                                                                                     | 0.633611799 |             | 0.65550645  | 1           | 0.93262402  |             |
|         | 0.787518102                                                                                                                     | 0.967141539 | 1           | 1.07666921  | 0.719264456 | 0.848019552 | 1           |
|         | 2.563360921                                                                                                                     | 1.399995645 | 1.844609209 | 1.406472399 | 1           | 2.140758586 |             |
|         | 1.027471828                                                                                                                     | 1.123250336 | 0.912774388 | 1           | 1.142502146 | 0.991574957 |             |
|         | 1.259257305                                                                                                                     | 1.099166953 | 0.929365544 | 1           | 0.670263728 | 0.946010304 |             |
|         | 0.933906876                                                                                                                     | 0.944579979 | 1.051523613 | 1           | 0.942917309 | 0.976042724 |             |
|         | 0.971080394                                                                                                                     | 0.600016637 | 1.297904323 | 1.194351103 |             |             |             |
| YNL144C | YNL144C::YNL144C::molecular_function unknown                                                                                    |             |             |             |             | 1.052750408 |             |
|         | 1.084154761                                                                                                                     |             | 0.837018514 |             | 0.932260537 | 1.081906286 |             |
|         | 0.937942718                                                                                                                     |             | 0.930747922 | 1.060890173 | 1.172071723 | 1.343172887 | 1           |
|         | 0.845259911                                                                                                                     | 0.574447572 | 0.994702032 | 1.08205799  | 1           | 1.285106486 |             |
|         | 1.601070223                                                                                                                     | 1.915633109 | 1.658921534 | 1           |             | 1.371473353 | 1.389553587 |
|         | 1.277173609                                                                                                                     | 1           | 0.899344757 | 0.82679329  | 1.342075564 | 1.053312317 |             |
|         | 1.219766249                                                                                                                     | 1           | 1.037516057 | 0.611995556 | 1.019534164 | 1.749417758 |             |
|         | 0.910648927                                                                                                                     |             |             |             |             |             |             |
| YNL146W | YNL146W::YNL146W::molecular_function unknown                                                                                    |             |             |             |             | 0.988723428 |             |
|         | 1.284586728                                                                                                                     | 0.947069665 | 1.106234965 |             | 0.876567044 | 0.895181327 |             |
|         | 0.985025691                                                                                                                     |             | 0.982590077 | 1.097910233 | 1.378907819 | 1.160101909 | 1           |
|         | 1.040510903                                                                                                                     | 0.761553308 | 1.952084798 | 1.614601063 | 1           | 1.172254665 |             |
|         | 2.503569134                                                                                                                     | 2.189669644 | 0.822017325 |             | 1.205171609 | 0.869890687 |             |
|         | 0.790187323                                                                                                                     | 1.088920347 | 1           | 0.841977253 |             | 1.310542597 | 1.167489237 |
|         | 1                                                                                                                               |             | 1.549151296 |             | 1.814998167 | 1.196102433 |             |
| YNL148C | YNL148C::ALF1::alpha-tubulin foldin; protein implicated in folding of alpha tubulin                                             |             |             | 1           |             |             |             |
|         |                                                                                                                                 |             |             | 2.092654221 | 1.746852655 | 1.401406701 | 1           |
|         | 1.953985561                                                                                                                     | 1.714086015 | 1.835173468 | 2.003919111 | 1           | 1.682315824 |             |
|         | 2.136532509                                                                                                                     | 1.855781546 | 1.994350263 | 1           | 0.53509353  | 0.629161849 |             |
|         | 1                                                                                                                               | 1.507676809 | 3.213008726 | 1.49371721  | 0.784677284 | 1           | 0.742852079 |
|         | 1.129199979                                                                                                                     |             | 0.910296394 | 0.959728067 | 1           | 0.974408664 | 1.07887933  |
|         | 1.204975798                                                                                                                     | 1.372363231 | 0.794677538 | 1           | 1.030594087 | 0.840671506 |             |
|         | 0.900409565                                                                                                                     | 0.544178532 | 0.835933048 | 1.190848653 |             |             |             |
| YNL162W | YNL162W::RPL42A::Homology to rat L36a and human L36a                                                                            |             |             |             |             |             |             |
|         | 0.88406406                                                                                                                      | 1.096681733 | 0.759221156 | 1.316713333 |             | 0.745808444 |             |
|         | 0.773260924                                                                                                                     | 1.229581405 | 1.050694036 |             | 0.611255459 | 0.660015422 |             |
|         | 0.793456337                                                                                                                     | 0.885006041 | 1           | 0.744823404 | 0.304776342 | 0.228859619 |             |
|         | 0.547629078                                                                                                                     | 1           | 1.576753808 | 1.000929815 | 0.739569049 | 0.934819207 | 1           |
|         | 0.902725669                                                                                                                     | 0.879001184 | 0.535840618 | 0.842891992 | 1.144905562 | 1           |             |
|         | 1.107337963                                                                                                                     | 1.656557793 | 0.933241446 | 0.751482911 | 2.189300857 | 1           |             |
|         | 1.037887436                                                                                                                     | 1.793563601 | 1.002671676 | 1.752195828 | 1.250672635 | 1.25652039  |             |
| YNL164C | YNL164C::IBD2::<u>I</u>nhibition of <U>B</U>ud <U>D</U>ivision                                                                  |             |             | 1           |             |             | 1           |
|         | 1.26685697                                                                                                                      | 1.232611449 | 1.43375668  | 1           | 1.144998144 | 1.070324315 |             |
|         | 1.616773973                                                                                                                     | 1.652573146 | 1           | 1.020615969 | 0.857394917 | 1.059778003 |             |
|         | 1.66876355                                                                                                                      | 1           | 0.479824995 |             | 0.520267579 | 1.038029662 | 1           |
|         | 0.846945386                                                                                                                     | 1.407027492 | 1.117008645 |             | 1           | 0.856291852 | 0.857005337 |
|         | 0.808791218                                                                                                                     | 1.013148586 | 1           | 0.834434985 | 1.128457271 | 1.089551258 |             |

|          |                                                                                                                                                                  |             |             |             |             |             |             |             |
|----------|------------------------------------------------------------------------------------------------------------------------------------------------------------------|-------------|-------------|-------------|-------------|-------------|-------------|-------------|
|          | 1.496913286                                                                                                                                                      | 1.745270026 | 1           | 0.701582163 | 0.907235651 | 1.099064602 |             |             |
|          | 0.486182506                                                                                                                                                      | 0.719122593 | 1.006967579 |             |             |             |             |             |
| YBL099W  | YBL099W::ATP1::mitochondrial F1F0-ATPase alpha subunit                                                                                                           |             |             |             |             |             | 1           |             |
|          | 1.282177168                                                                                                                                                      | 0.823532116 |             | 0.593754356 | 1           | 1.455080342 | 1.256517057 |             |
|          | 0.854376707                                                                                                                                                      | 1           | 1.181213969 | 0.845813926 |             | 1           | 1.366771612 |             |
|          | 1.579460269                                                                                                                                                      | 0.96013898  | 1           | 0.720226194 | 0.364249065 | 0.440330865 |             |             |
|          | 0.953058805                                                                                                                                                      | 1           | 0.930694481 | 0.574119418 | 0.908719362 | 1.176152043 |             |             |
|          | 0.887694639                                                                                                                                                      | 1           | 1.004062353 | 0.602821562 | 0.860528112 | 0.732792086 |             |             |
|          | 0.464170394                                                                                                                                                      | 1           | 0.61199263  | 0.372838778 | 0.571066478 | 0.499194253 |             |             |
|          | 0.870891684                                                                                                                                                      | 0.520996305 |             |             |             |             |             |             |
| YNL166C  | YNL166C::BNI5::bud neck involved; localizes to mother-bud neck in a septin-dependent manner; bni5 shows synthetic enhancement of septin Ts- mutant phenotypes. 1 |             |             |             |             |             |             |             |
|          | 0.622096303                                                                                                                                                      | 0.729351386 | 0.816566647 | 0.846418568 | 1           |             |             |             |
|          | 0.748482003                                                                                                                                                      | 0.739604048 | 0.759005918 | 0.839818391 | 1           | 0.596265291 |             |             |
|          | 0.648244274                                                                                                                                                      | 0.527000717 | 1.131193621 | 1           | 0.61738255  | 0.679739418 |             |             |
|          | 0.632473839                                                                                                                                                      | 0.913765602 | 1           | 0.82570381  | 0.53076623  | 0.542911391 |             |             |
|          | 0.903512126                                                                                                                                                      | 1           | 0.770242602 | 0.595978325 | 0.597814457 |             | 1           |             |
|          | 0.932251443                                                                                                                                                      | 0.98484834  | 0.934899214 | 1.230012609 | 1.179918382 | 1           |             |             |
|          | 0.778149452                                                                                                                                                      | 0.777846712 | 1.081346913 | 0.544432281 | 1.112035535 | 1.155823726 |             |             |
| YBL101C  | YBL101C::ECM21::ExtraCellular Mutant                                                                                                                             |             |             |             |             |             | 1           | 1.458158519 |
|          | 1.227781909                                                                                                                                                      | 1.513114808 | 1.032203879 | 1           | 1.445647165 | 1.395868189 |             |             |
|          | 1.051011023                                                                                                                                                      | 1.162784637 | 1           | 1.655075744 | 1.618935772 |             |             |             |
|          |                                                                                                                                                                  | 0.530865424 | 1           | 0.588675683 |             | 0.71374288  |             |             |
|          | 1.064796545                                                                                                                                                      | 0.773136816 | 0.812302124 | 0.947255233 | 1.130065827 | 1           |             |             |
|          | 1.206830844                                                                                                                                                      | 0.756256024 |             | 0.913959427 | 0.813812972 | 1           | 0.659571833 |             |
|          | 0.626741498                                                                                                                                                      | 0.73326539  |             | 0.84696692  | 0.754787878 |             |             |             |
| YNL168C  | YNL168C::YNL168C::molecular_function unknown                                                                                                                     |             |             |             |             |             | 1           | 0.709484011 |
|          | 0.660623982                                                                                                                                                      | 0.620846108 | 0.675849696 | 1           | 0.665670436 | 0.609019269 |             |             |
|          | 0.721640844                                                                                                                                                      | 1           | 0.703127556 | 0.823853231 |             | 0.862885344 | 1           |             |
|          | 1.347785473                                                                                                                                                      |             | 1.28206943  | 1.15705946  | 1           | 1.082431054 | 0.758611219 |             |
|          | 1.080605102                                                                                                                                                      | 1.02452791  | 1           | 1.203426447 | 1.2313617   | 1.465776788 |             |             |
|          | 1.236397713                                                                                                                                                      | 0.897974869 | 1           | 0.871562621 | 1.119120743 | 1.217876117 |             |             |
|          | 1.117194781                                                                                                                                                      | 0.919092698 | 1           | 0.946033187 | 1.012040197 | 1.041552614 |             |             |
|          | 0.862070202                                                                                                                                                      | 0.995329532 | 1.138311158 |             |             |             |             |             |
| YBL101WB | YBL101WB                                                                                                                                                         |             |             |             |             |             | 1           | 1.478853903 |
|          | 1.419924491                                                                                                                                                      | 1.276723652 | 1.362635859 | 1.266862833 | 1           | 1.636447429 |             |             |
|          | 1.684401954                                                                                                                                                      |             |             | 0.928854592 |             | 0.6832003   | 1.123619244 |             |
|          | 0.511201957                                                                                                                                                      | 1.064342119 |             | 1           | 0.868831011 | 0.923429093 |             |             |
|          | 1.070508128                                                                                                                                                      | 0.965809188 | 1           | 0.96070502  | 1.430112281 | 2.306764727 |             |             |
|          | 2.857885729                                                                                                                                                      | 1.84822345  | 1           | 0.843439388 | 1.673663389 | 1.567824916 |             |             |
|          | 0.97768392                                                                                                                                                       | 0.959970676 | 1.006967579 |             |             |             |             |             |
| YNL170W  | YNL170W::YNL170W::molecular_function unknown                                                                                                                     |             |             |             |             |             | 1           | 1.29915246  |
|          | 1.28214642                                                                                                                                                       | 0.715217966 | 1.215323398 | 1           | 0.908335806 | 0.798879245 |             |             |
|          | 1.130024736                                                                                                                                                      | 1.007338493 | 1           | 0.978987696 | 0.904194002 | 1.46932358  |             |             |
|          | 0.728623646                                                                                                                                                      | 1           | 0.994737067 | 0.722817172 | 0.834928349 | 1.086568876 | 1           |             |
|          | 1.606280065                                                                                                                                                      | 2.930061289 | 1.702319039 | 0.717886282 | 1           | 0.729779411 |             |             |
|          | 0.681002446                                                                                                                                                      | 0.543241723 | 0.621891609 | 0.699820574 | 1           | 0.79995924  |             |             |
|          | 1.107804175                                                                                                                                                      | 0.85682014  | 0.787178919 | 1.363435406 | 1           | 0.91511779  |             |             |
|          | 1.305121839                                                                                                                                                      | 1.111510701 | 1.568904343 | 1.464110298 | 1.353714707 |             |             |             |
| YBL103C  | YBL103C::RTG3::bHLH/Zip transcription factor which regulates CIT2 gene expression                                                                                |             |             |             |             |             | 1.018274376 | 0.911054414 |
|          | 1.140120502                                                                                                                                                      | 0.823952317 |             | 1.843411381 |             | 0.529360409 |             |             |
|          | 1.212967335                                                                                                                                                      | 1           | 0.880550889 | 0.494752528 | 0.749347025 | 1           |             |             |
|          | 1.531162797                                                                                                                                                      | 1.082537316 | 1.149034469 | 1.262543948 |             | 0.983766969 |             |             |
|          | 0.678688488                                                                                                                                                      | 1.128152107 | 1           | 1.381856358 | 0.690463409 | 0.904690623 |             |             |
|          | 1                                                                                                                                                                | 0.553825452 | 0.662480627 | 0.856946889 | 0.576633873 | 0.711054666 |             |             |

YBL105C YBL105C::PKC1::Protein Kinase C 1 1.084754089 0.907515751  
1.003426097 0.84238324 1 1.023181367 1.029623426 0.824853522  
0.70653557 1 0.973124313 1.139036361 0.586058438 1.1315677 1  
1.219930789 0.809697533 0.586103909 0.700272076 1 1.108502605  
0.931800921 1 0.965810879 1.1939562 0.98468823  
1.288570918 1 1.383201715 1.242166801 1  
0.684707958 0.903274385 0.895120671 0.465789018 0.800342027 0.985077  
YBL107C YBL107C::YBL107C::molecular\_function unknown 0.728921913  
1.032907932 0.846436555 1.104277053 0.724015332 0.773260924  
1.100255102 0.878905695 1.06300558 1.355536521 1.076887923 1  
1.093553337 0.977687297 1.187530757 1.723648259 1 1.669295078  
1.656370393 1.933108985 1.459413006 1 0.991898318 1.437918553  
0.809945497 0.595267985 1.132865613 1 1.142850283 2.634990915  
1.925778237 1.78909256 2.436072109 1 1.303433133 2.187877333  
1.33662754 1.354816401 1.404508296 1.501695189  
YBR008C YBR008C::FLR1::Fluconazole Resistance 1 1 1.354565914  
1.395649362 1.180701896 1.360182259 1 1.319871203 1.206788994  
1.372673573 1.265969143 1 2.254094678 2.064969271 1.552003477  
1.233257084 1 1.330904124 0.864156916 1.120923658 1.19079475 1  
1.154987364 1.152401781 0.953515715 0.673056019 1 1.687872565  
2.013326561 1.517916723 1.118885498 1.028922949 1 2.578971488  
2.463688608 1.633174814 1.445206319 0.533855233 1 2.584881167  
2.686676583 1.63339116 1.345935864 1.004528133 0.899265805  
YBR010W YBR010W::HHT1::Histone H3 (HHT1 and HHT2 code for identical  
proteins) 1 1.087400828 1.2518071 1.053500661 1.587706488 1  
1.02361507 0.913453474 1.448116869 1.488035641 1 0.892082636  
0.940757695 0.822084216 1.500419458 1 1.154195712 0.796834723  
0.484828565 1.49894956 1 1.551066405 1.037572728 0.958802256  
1.327275811 1 0.749672286 0.755742084 0.835827422 0.885372504  
1.036188226 1 0.418886366 0.842556319 0.587439362 0.940352724  
0.851146855 1 0.609942565 0.87989988 1.162715114 1.377515499  
1.306419316 1.400122756  
YBR012C YBR012C::YBR012C::molecular\_function unknown 1 1.337546097  
1.538703384 1.361870341 1.595179835 1 1.152169896 1.166875657  
1.689124859 1.48499767 1 1.242930462 1.349992467 1.825435928  
1.321287089 1 1.202872197 1 0.832536537  
1.768014193 0.954632953 1 0.884061471 1.404220103 1.215412188  
0.929821818 1.150031703 1 0.727415536 1.878442282 4.455922537  
1 0.622914506 1.282518462 2.626467892 0.782559588 1.027982598  
YBR012WB YBR012WB 1 1.296442 1.146140357 1.346244268 1.080831843 1  
1.252282113 1.170545588 1.079426105 1.007961732 1 1.287644222  
1.302989506 1.036199509 1.342534305 1 1.136838475 1.338712593  
0.903546526 1 0.401648165 0.293771014 0.30141511 0.429095061 1  
0.845743027 0.838839146 1.150239469 1.229366453 0.764378936 1  
0.957301484 1.055735403 2.445392316 3.180455715 2.221108628 1  
0.628961986 0.981207599 0.946961486 0.762510996 0.557437069  
YNL172W YNL172W::APC1::anaphase-promoting complex component  
1.037974935 0.91333202 0.781217241 0.768867387  
0.848732813 0.87287754 0.986849991 0.884604496 1  
0.699533362 1 0.665896102 1 1.132293589  
1.178077148 1.747537299 1.458333697 1.056602508 1 0.894743046  
0.938641904 0.763087307 0.656774046 0.750034529 1 1.372506888  
1.629223126 1.726994428 1.661662208 1.606169188 1.117296244  
YNL186W YNL186W::UBP10::involved in telomeric silencing 1 0.783207876  
0.683883878 1.124665806 0.695590325 1 0.89631575 0.880376805  
0.751838995 0.746110593 1 0.97830707 0.927399253 0.536460377  
1.153132532 1 1.031828808 0.991368633 0.60871899 1

|             |                                                                                                                                     |             |             |             |             |             |
|-------------|-------------------------------------------------------------------------------------------------------------------------------------|-------------|-------------|-------------|-------------|-------------|
| 0.551500744 | 0.304882753                                                                                                                         | 0.372744317 | 0.691168227 | 1           | 0.682546869 |             |
| 0.632883936 | 0.78834355                                                                                                                          | 0.856948232 | 0.724279831 | 1           | 0.641355553 |             |
| 0.669330004 | 0.710396363                                                                                                                         | 1.240886496 | 0.864919067 | 1           | 0.501952133 |             |
| 0.635051914 | 1.143128015                                                                                                                         | 0.929289547 | 0.636395548 | 0.795942198 |             |             |
| YNL188W     | "YNL188W::KAR1::involved in spindle pole body duplication and karyogamy, interacts with Cdc31p, localizes to the spindle pole body" |             |             |             | 1           |             |
| 1.099863096 | 1.196091311                                                                                                                         | 1.147908271 | 1           | 1.002350241 |             |             |
| 1.251900904 | 1                                                                                                                                   | 1.086257183 | 1.229354387 | 0.986681441 | 1           |             |
| 0.992968712 | 0.256116739                                                                                                                         | 1           | 1           | 0.699081592 |             |             |
| 0.815383032 | 0.586064762                                                                                                                         | 0.466200523 | 1.110114876 | 1           | 1.539729635 |             |
| 1.97581892  | 1.425470055                                                                                                                         | 1.879880158 | 2.933395581 | 1           | 1.977010377 |             |
| 2.434604382 | 2.385098165                                                                                                                         | 2.913402039 | 2.828346573 |             |             |             |
| YLR049C     | YLR049C::YLR049C::molecular_function unknown                                                                                        |             |             |             | 1           | 0.914717255 |
| 0.876518592 | 1.013218549                                                                                                                         | 1.12388801  | 1           | 1.059461441 | 1.002899766 |             |
| 0.850407807 | 0.87551351                                                                                                                          | 1           | 0.641541263 | 0.772981277 | 0.713677145 |             |
| 0.788175325 | 1                                                                                                                                   | 1.089256117 | 0.823683727 | 1.147156619 | 1.286931167 | 1           |
| 0.67546889  | 1.114161862                                                                                                                         | 1.260473977 | 1.135391597 | 1           | 1.181554937 |             |
| 1.209812373 | 1.238484436                                                                                                                         | 1.015242104 | 1.608225904 | 1           | 0.760718965 |             |
| 1.074795028 | 0.865280741                                                                                                                         | 0.634477915 | 1.134035183 | 1           | 1.054509073 |             |
| 0.724264465 | 1.413258482                                                                                                                         | 1.330964747 | 1.166331183 |             |             |             |
| YNL190W     | YNL190W::YNL190W::molecular_function unknown                                                                                        |             |             |             | 1           | 1.568616389 |
| 0.984902236 | 0.941545709                                                                                                                         | 0.91155098  | 1           | 1.079697447 | 1.01136403  |             |
| 0.650489075 | 0.807204189                                                                                                                         | 1           | 1.259964313 | 1.178783591 | 1.032415713 |             |
| 0.915625538 | 1                                                                                                                                   | 0.82312384  | 0.468424854 | 1.00627383  | 0.565161211 | 1           |
| 0.302041041 | 0.157194242                                                                                                                         | 0.187344485 | 0.412357907 | 1           | 0.726110962 |             |
| 0.758906156 | 1.333172714                                                                                                                         | 1.421833401 | 0.605383571 | 1           | 0.586043759 |             |
| 0.48168824  | 0.608647873                                                                                                                         | 0.734577068 | 0.308630203 | 1           | 0.86623336  |             |
| 0.689206564 | 1.186975285                                                                                                                         | 0.661514698 | 0.773905649 | 0.651464271 |             |             |
| YLR051C     | YLR051C::YLR051C::molecular_function unknown                                                                                        |             |             |             | 1           | 0.769056895 |
| 0.92952957  | 0.890421325                                                                                                                         | 1.458301376 | 1           | 0.704780026 | 0.686044968 |             |
| 1.319811945 | 1                                                                                                                                   | 0.598285212 | 0.576511433 | 0.701362347 | 1.024725413 | 1           |
| 0.333873065 | 0.219334527                                                                                                                         | 0.299930167 | 0.977798019 | 1           | 0.652490913 |             |
| 1.512346141 | 1.251063964                                                                                                                         | 0.811316915 | 1           | 0.589846713 | 0.665527778 |             |
| 0.414287254 | 0.4413489                                                                                                                           | 0.834950335 | 1           | 0.85567578  | 1.145323058 |             |
| 1.361672655 | 1.029395322                                                                                                                         | 1.806862363 | 1           | 0.851439879 | 1.05388384  |             |
| 0.996811171 | 1.975230298                                                                                                                         | 1.00621312  | 1.281913524 |             |             |             |
| YNL192W     | YNL192W::CHS1::disrupts mating and sporulation efficiently                                                                          |             |             |             |             |             |
| 1.033049777 | 1.032907932                                                                                                                         | 1.282513412 | 0.797859733 | 1.230099687 |             |             |
| 1.301582607 | 0.760761992                                                                                                                         | 1.331017695 | 1.283010784 | 0.541046057 |             |             |
| 1.025001532 | 1                                                                                                                                   | 0.863729622 | 1.026824982 | 0.799403848 | 0.607654228 | 1           |
| 0.897635603 | 0.624411223                                                                                                                         | 0.58267965  | 0.963783405 | 1           | 0.834686214 |             |
| 0.849321618 | 0.849762619                                                                                                                         | 0.654790805 | 0.845006628 | 1           | 0.945875291 |             |
| 0.871548669 | 0.879196427                                                                                                                         | 0.556074742 | 0.703680818 | 1           | 0.80106259  |             |
| 1.011176027 | 0.817312776                                                                                                                         | 0.683968845 | 0.811486071 | 0.69787232  |             |             |
| YLR053C     | YLR053C::YLR053C::molecular_function unknown                                                                                        |             |             |             | 1           | 1.507061558 |
| 1.383889979 | 1.226326212                                                                                                                         | 1           | 1.095931679 | 1.198225239 | 1           |             |
| 0.999640947 | 1.19871905                                                                                                                          | 1.479848886 | 1.261246416 | 1           | 0.982474762 |             |
| 2.266268323 | 1.438462781                                                                                                                         | 1           | 0.702751591 | 1.831028782 | 0.81017773  | 1           |
| 1.002198502 | 0.878353623                                                                                                                         | 0.940405714 | 0.989335414 | 1.005331793 | 1           |             |
| 0.918127283 | 0.915208815                                                                                                                         | 0.774117726 | 0.712423498 | 1.298031711 | 1           |             |
| 0.83353717  | 1.255119003                                                                                                                         | 1.026797642 | 1.66632554  | 1.279051418 | 1.313436    |             |
| YNL194C     | YNL194C::YNL194C::molecular_function unknown                                                                                        |             |             |             | 1           | 1.453486769 |
| 1.629400705 | 2.383531004                                                                                                                         | 1.30008948  | 1           | 1.646152349 | 2.755269766 |             |
| 1.839897831 | 1.492005311                                                                                                                         | 1           | 2.871818247 | 6.46035959  | 9.988674181 |             |
| 3.03618376  | 1                                                                                                                                   | 4.381295872 | 8.901842848 | 2.346013746 | 1           |             |
| 3.274025197 | 2.980687855                                                                                                                         | 0.788384816 | 0.940399065 | 0.822838488 |             |             |
| 0.961830374 | 0.910412155                                                                                                                         | 1.027680529 | 1           | 1.269543338 | 0.87387234  |             |

|         |                                                                                                                                                                                                                                                               |             |             |             |             |             |             |
|---------|---------------------------------------------------------------------------------------------------------------------------------------------------------------------------------------------------------------------------------------------------------------|-------------|-------------|-------------|-------------|-------------|-------------|
|         | 0.721228511                                                                                                                                                                                                                                                   |             | 0.969243411 |             | 0.865433513 |             | 1.056433244 |
|         | 0.884380232                                                                                                                                                                                                                                                   |             |             |             |             |             |             |
| YLR055c | "YLR055c::SPT8::transcription factor, probable member of histone acetyltransferase SAGA complex"                                                                                                                                                              |             |             |             |             |             |             |
|         | 1                                                                                                                                                                                                                                                             |             | 0.863707234 |             | 1.012597673 |             | 0.709131611 |
|         | 0.530557482                                                                                                                                                                                                                                                   | 1           | 0.972606656 | 0.899947342 | 0.909616187 | 1           |             |
|         | 0.871970557                                                                                                                                                                                                                                                   | 0.922868284 | 1.023328072 | 0.645963765 | 1           | 0.857410697 |             |
|         | 0.586762146                                                                                                                                                                                                                                                   | 0.675054628 | 1           | 1.505908214 | 1.935036897 | 1.452644712 |             |
|         | 1.222498173                                                                                                                                                                                                                                                   | 0.879912263 | 0.847689325 | 0.873932    | 1.129531538 |             |             |
|         | 0.848745487                                                                                                                                                                                                                                                   | 1           | 0.830416736 | 0.770899713 | 0.844833192 | 1.075089003 |             |
|         | 0.93634271                                                                                                                                                                                                                                                    | 1           | 0.688426446 | 0.723680652 | 0.962892967 | 0.743663644 |             |
|         | 0.755253198                                                                                                                                                                                                                                                   | 1.041116945 |             |             |             |             |             |
| YNL196C | "YNL196C::SLZ1::sporulation-specific protein with a leucine zipper motif, regulated by the transcription factor Ume6 and expressed early in meiosis"                                                                                                          |             |             |             |             |             |             |
|         | 1                                                                                                                                                                                                                                                             |             | 1.862650123 | 1.472851133 | 1.926578958 | 1           | 1.560915588 |
|         | 1.972441988                                                                                                                                                                                                                                                   | 1.963694739 | 1           | 1.649251444 | 1.26743416  | 2.115723609 |             |
|         | 1.719399725                                                                                                                                                                                                                                                   | 1           | 1.180896662 |             | 1.196359278 | 0.287549242 |             |
|         | 0.594892514                                                                                                                                                                                                                                                   | 0.353318537 | 1           | 1.006400746 |             | 0.971736987 |             |
|         | 0.717939556                                                                                                                                                                                                                                                   | 1           | 1.171736037 | 1.262563382 | 1.021484581 | 1           |             |
|         | 0.889102979                                                                                                                                                                                                                                                   |             | 1.02840425  | 1.47542639  |             |             |             |
| YBR014C | YBR014C::YBR014C::molecular_function unknown                                                                                                                                                                                                                  |             |             |             |             |             |             |
|         | 1                                                                                                                                                                                                                                                             |             |             |             | 1           |             | 1.040270837 |
|         | 1.501772336                                                                                                                                                                                                                                                   | 1.140455003 | 1.716768937 | 1           | 1.086832676 | 1.105033703 |             |
|         | 1.646002168                                                                                                                                                                                                                                                   | 1.542666353 | 1           | 1.189478692 | 1.447735706 | 2.190527717 |             |
|         | 1.501863418                                                                                                                                                                                                                                                   | 1           | 1.300930793 | 1.104628885 | 1.131525257 | 1.692309122 | 1           |
|         | 1.719723877                                                                                                                                                                                                                                                   | 2.133151256 | 1.916277423 | 1.669530811 | 1           | 1.239387343 |             |
|         | 1.831463773                                                                                                                                                                                                                                                   | 1.243038378 | 0.830061128 | 1.15389659  | 1           | 1.407824107 |             |
|         | 2.338045479                                                                                                                                                                                                                                                   | 2.078473488 | 1.449869048 | 2.078233599 | 1           | 1.022071989 |             |
|         | 1.536547368                                                                                                                                                                                                                                                   | 0.964499843 | 1.384920094 | 1.448443501 | 1.227624805 |             |             |
| YLR069c | YLR069c::MEF1::mitochondrial elongation factor G-like protein                                                                                                                                                                                                 |             |             |             |             |             |             |
|         | 0.843431598                                                                                                                                                                                                                                                   | 0.89397216  | 1.339538857 | 0.843871267 |             | 1.081180112 |             |
|         | 1.369682331                                                                                                                                                                                                                                                   | 0.96458542  | 0.89829388  |             | 0.904224    | 0.914925215 |             |
|         | 0.939527087                                                                                                                                                                                                                                                   | 0.783191212 | 1           | 1.922886592 | 1.540193277 | 1.769165456 |             |
|         | 1.646851265                                                                                                                                                                                                                                                   | 1           | 1.446559781 | 0.921221107 | 0.70997679  | 1           |             |
|         | 0.93076907                                                                                                                                                                                                                                                    | 0.748869451 | 0.898979556 | 0.849616463 | 1.058966766 | 1           |             |
|         | 1.184548171                                                                                                                                                                                                                                                   | 0.54388915  | 0.756019862 | 0.492382773 | 0.437745139 | 1           |             |
|         | 1.128439309                                                                                                                                                                                                                                                   | 0.745092557 | 0.926180147 | 1.032543933 | 1.15689491  | 0.959683866 |             |
| YNL210W | "YNL210W::MER1::Disp. for axial elements in meiosis but required for full chr. pairing & chr. condensation seen by in situ hybridization, wt level of synaptonemal complexes, heteroduplex DNA, gene conversion & reciprocal recombination & spore viability" |             |             |             |             |             |             |
|         | 1                                                                                                                                                                                                                                                             |             | 1.801434675 | 1.214617274 | 1.229513935 |             |             |
|         | 1.190332744                                                                                                                                                                                                                                                   | 1           | 1.232108366 | 1.28471939  | 1.372893914 | 1.324770215 | 1           |
|         | 1.228515855                                                                                                                                                                                                                                                   | 0.996714141 | 1.099625628 | 1.450424243 | 1           | 0.883180579 |             |
|         |                                                                                                                                                                                                                                                               |             | 0.48160035  |             |             |             |             |
|         | 1.267208425                                                                                                                                                                                                                                                   | 1.180780017 | 1           | 0.908128424 | 1.08080839  | 0.850508736 |             |
|         | 0.914516564                                                                                                                                                                                                                                                   | 1           | 1.012099355 | 1.094838437 | 0.913744706 |             |             |
|         | 0.843609337                                                                                                                                                                                                                                                   | 0.956181415 |             |             |             |             |             |
| YBR016W | YBR016W::YBR016W::molecular_function unknown                                                                                                                                                                                                                  |             |             |             |             |             |             |
|         | 1                                                                                                                                                                                                                                                             |             |             |             | 1           |             | 0.900935121 |
|         | 1.357432437                                                                                                                                                                                                                                                   | 0.98177957  | 1.081402362 | 1           | 0.98734096  | 1.213310012 |             |
|         | 1.128987289                                                                                                                                                                                                                                                   | 1.150794248 | 1           | 1.162463535 | 1.275742111 | 2.043826275 |             |
|         | 0.980907422                                                                                                                                                                                                                                                   | 1           | 1.61835723  | 1.215896564 | 1.258784003 | 1.17680463  | 1           |
|         | 1.239496732                                                                                                                                                                                                                                                   | 1.308821644 | 1.303753543 | 1.01208991  | 1           | 0.924164338 |             |
|         | 1.347541048                                                                                                                                                                                                                                                   | 1.214195509 | 0.753679337 | 0.905361583 | 1           | 1.049890754 |             |
|         | 1.159138227                                                                                                                                                                                                                                                   | 1.329015999 | 1.460602397 | 0.935045349 | 1           | 0.96788927  |             |
|         | 1.047082655                                                                                                                                                                                                                                                   | 1.266753041 | 1.031208188 | 1.158063569 | 1.085773768 |             |             |
| YNL212W | YNL212W::VID27::Vacuole import and degradation                                                                                                                                                                                                                |             |             |             |             |             |             |
|         | 1                                                                                                                                                                                                                                                             |             |             |             | 1           |             | 1.44767184  |
|         | 1.265032919                                                                                                                                                                                                                                                   | 1.349287024 | 1.322869286 | 1           | 1.312763369 | 1.424916287 |             |
|         | 1.398280698                                                                                                                                                                                                                                                   | 1           | 1.346366133 | 1.329418121 | 1.236018361 | 1.562635173 |             |
|         | 1.477977063                                                                                                                                                                                                                                                   |             | 1.084513265 | 0.884317266 |             |             |             |

|         |                                                                                                                                                                                                                                                |             |             |             |             |                         |
|---------|------------------------------------------------------------------------------------------------------------------------------------------------------------------------------------------------------------------------------------------------|-------------|-------------|-------------|-------------|-------------------------|
|         | 0.886328992                                                                                                                                                                                                                                    |             | 0.99678902  | 1.132599224 | 1           | 0.817855408             |
|         | 0.95202888                                                                                                                                                                                                                                     | 1.168485036 | 1.136579684 |             | 1           | 1.117440929 1.740149629 |
|         | 1.150427588                                                                                                                                                                                                                                    | 1.233365803 | 0.693071946 | 1.23200292  |             |                         |
| YLR071c | "YLR071c::RGR1::affects chromatin structure, transcriptional regulation of diverse genes and sporulation, required for glucose repression, HO repression, RME1 repression and sporulation"                                                     |             |             |             |             |                         |
|         | 1.203982378                                                                                                                                                                                                                                    | 1           | 1.186117765 | 1.163504921 |             | 0.880605876 1           |
|         | 1.0742151                                                                                                                                                                                                                                      | 0.650126638 | 1.000912826 | 1           |             | 0.797402881 0.78772367  |
|         | 0.812949434                                                                                                                                                                                                                                    | 1           | 0.672154376 | 0.484567754 | 0.793156569 | 1                       |
|         | 0.987521376                                                                                                                                                                                                                                    | 0.961391862 | 1.038074437 | 1.117215374 | 1.097496162 | 1                       |
|         | 0.992279531                                                                                                                                                                                                                                    | 0.67568009  | 0.971783515 | 1.132187162 | 0.590100542 | 1                       |
|         | 0.894940286                                                                                                                                                                                                                                    | 0.807273694 | 1.098493677 | 0.838232827 | 0.660285901 | 1.007843244             |
| YNL214W | "YNL214W::PEX17::23 kDa peroxisome associated protein, binds Pex14p"                                                                                                                                                                           |             |             |             |             |                         |
|         | 0.928390408                                                                                                                                                                                                                                    | 0.978244693 |             | 1.075886909 |             | 0.806344858             |
|         | 0.879803981                                                                                                                                                                                                                                    | 1.003611063 |             | 1.088685693 | 1.082044493 | 1.326322399             |
|         | 1.116047446                                                                                                                                                                                                                                    | 1           | 0.901729499 | 0.886760611 | 1.190112624 | 1.349631733 1           |
|         | 1.648744847                                                                                                                                                                                                                                    | 2.034255683 | 1.938396134 | 1.017842228 | 1           | 1.399367631             |
|         | 1.305342723                                                                                                                                                                                                                                    | 1.003337753 | 1.106708446 | 1           | 1.226253521 | 1.400089335             |
|         | 1.778500951                                                                                                                                                                                                                                    | 1.019556206 | 1.245476348 | 1           | 1.467457465 | 1.473219773             |
|         | 1.116431212                                                                                                                                                                                                                                    | 0.625784191 | 1.419319386 | 1.023604482 |             |                         |
| YBR030W | YBR030W::YBR030W::molecular_function unknown                                                                                                                                                                                                   |             |             |             |             |                         |
|         | 0.730976504                                                                                                                                                                                                                                    | 0.960611143 | 0.837337669 | 1           | 0.83211946  | 0.869637664             |
|         | 0.821384447                                                                                                                                                                                                                                    | 0.980991746 | 1           | 0.605949005 | 0.571637796 | 0.54663187              |
|         | 0.881816137                                                                                                                                                                                                                                    | 1           | 0.956607212 | 0.625509539 | 0.689408042 | 0.729357549 1           |
|         | 1.267893077                                                                                                                                                                                                                                    |             | 0.851222187 | 1.049606109 | 1           | 0.897310654 0.926434393 |
|         | 0.995507207                                                                                                                                                                                                                                    |             | 1.072416858 | 1           | 0.849597416 | 1.168556614 1.196288026 |
|         | 1.119725255                                                                                                                                                                                                                                    | 1.397366315 | 1           | 0.671765355 | 0.621090349 | 0.672342268             |
|         | 0.982955423                                                                                                                                                                                                                                    | 0.752691471 | 0.975445103 |             |             |                         |
| YLR073C | YLR073C::YLR073C::molecular_function unknown                                                                                                                                                                                                   |             |             |             |             |                         |
|         | 0.823673639                                                                                                                                                                                                                                    | 0.938633912 | 1.014634272 | 1           | 0.727563028 | 1.08515415              |
|         | 1.38140746                                                                                                                                                                                                                                     | 1           | 0.471250131 | 0.39797091  | 0.57095247  | 0.784154315 1           |
|         | 0.371473473                                                                                                                                                                                                                                    | 0.39547777  | 0.460758917 | 0.683922584 | 1           | 0.526599443             |
|         | 0.792684862                                                                                                                                                                                                                                    | 1           | 0.571826834 | 0.442677613 | 0.448158755 | 0.870425696             |
|         | 0.744785591                                                                                                                                                                                                                                    | 1           | 0.31604212  | 0.572221289 | 0.342120758 | 0.70858048              |
|         | 1.134283435                                                                                                                                                                                                                                    | 1           | 0.358563506 | 0.629425935 | 0.817247917 | 1.38498262              |
|         | 0.517321711                                                                                                                                                                                                                                    | 0.990330781 |             |             |             |                         |
| YBR032W | YBR032W::YBR032W::molecular_function unknown                                                                                                                                                                                                   |             |             |             |             |                         |
|         | 1.683554345                                                                                                                                                                                                                                    | 1.276280413 | 1.616420788 | 1           | 1.25536445  | 1.196298909             |
|         | 1.435400793                                                                                                                                                                                                                                    | 1.410657257 | 1           | 1.398899759 | 1.319434083 | 1.656258442             |
|         | 1.161515179                                                                                                                                                                                                                                    | 1           | 0.638507135 | 0.581841304 | 0.885417376 |                         |
|         | 0.310832577                                                                                                                                                                                                                                    | 0.545690878 | 0.319847086 | 0.267434971 | 1           | 1.167323683             |
|         | 0.78051217                                                                                                                                                                                                                                     | 0.683337815 | 0.969454309 | 0.753912566 | 1           | 0.834470074             |
|         | 1.142496572                                                                                                                                                                                                                                    | 0.59531247  | 0.435277953 | 1.829806192 | 1           | 0.898819606             |
|         | 1.453835341                                                                                                                                                                                                                                    | 0.626060643 | 1.895261717 | 0.969463799 | 1.147943055 |                         |
| YLR075w | "YLR075w::RPL10::similar to members of the QM gene family, which is implicated in differentiation in other eukaryotes and tumorigenesis in humans; homology to rat L10; ubiquinol-cytochrome C reductase complex subunit VI requiring protein" |             |             |             |             |                         |
|         | 0.899369918                                                                                                                                                                                                                                    | 0.826172693 | 1.151842286 | 1.061341827 | 1           | 0.802443634             |
|         | 0.761463428                                                                                                                                                                                                                                    | 0.623012302 | 0.838595779 | 1           | 1.05541088  | 0.595989335             |
|         | 0.510448667                                                                                                                                                                                                                                    | 0.880691541 | 1           | 1.587582551 | 0.935914888 | 1.130982371             |
|         | 0.900727395                                                                                                                                                                                                                                    | 1           | 1.257919747 | 1.226069028 | 1.205444009 | 1.431380056             |
|         | 1.321489766                                                                                                                                                                                                                                    | 1           | 1.318437842 | 1.403227598 | 1.162118262 | 0.711377568             |
|         | 0.910627127                                                                                                                                                                                                                                    | 1           | 1.50793091  | 1.099273067 | 0.841433093 | 1.346085866             |
|         | 0.968063772                                                                                                                                                                                                                                    | 1.34145592  |             |             |             |                         |
| YBR034C | YBR034C::HMT1::hnRNP methyltransferase                                                                                                                                                                                                         |             |             |             |             |                         |
|         | 0.725870833                                                                                                                                                                                                                                    | 1.041014694 | 1.222554316 | 1           | 0.834569142 | 0.834807049             |

|             |                                                                                                                                           |             |             |             |             |             |
|-------------|-------------------------------------------------------------------------------------------------------------------------------------------|-------------|-------------|-------------|-------------|-------------|
| 1.081755678 | 1.302187577                                                                                                                               | 1           | 0.404735274 | 0.373070339 | 0.41530656  |             |
| 0.916715385 | 1                                                                                                                                         | 0.378255347 | 0.277275252 | 0.415371315 | 0.736164626 |             |
| 0.359802404 | 0.375566981                                                                                                                               | 0.306625903 | 0.548984837 | 1           | 0.825402334 |             |
| 0.689607538 | 0.772241913                                                                                                                               | 0.987562495 | 0.928079422 | 1           | 0.535340942 |             |
| 0.607346922 | 0.485275002                                                                                                                               | 0.706064485 | 0.895445315 | 1           | 0.475909343 |             |
| 0.568911605 | 0.843227544                                                                                                                               | 1.064596291 | 0.56086979  | 0.92991272  |             |             |
| YLR077W     | YLR077W::YLR077W::molecular_function unknown                                                                                              |             |             |             | 1           | 0.843548093 |
| 0.832606856 | 0.955360298                                                                                                                               | 1.006454653 | 1           | 0.845232544 | 0.988067768 |             |
| 0.952605816 | 0.935994376                                                                                                                               | 1           | 0.834346882 | 0.818315429 | 0.912192499 |             |
| 0.945270619 | 1                                                                                                                                         | 1.06260745  |             | 0.945737956 | 1.271438817 |             |
| 1.098312391 | 1.158034763                                                                                                                               |             | 1.323307542 | 1           | 0.998147874 |             |
| 0.831599002 | 0.927331853                                                                                                                               | 0.920481229 | 1           | 0.942481544 | 1.159268578 |             |
| 1.046997388 | 0.871622967                                                                                                                               | 1.250898162 | 1           | 1.009149294 | 1.210530964 |             |
| 0.932728869 | 1.289855236                                                                                                                               | 1.213490142 | 0.929037055 |             |             |             |
| YBR036C     | "YBR036C::CSG2::Required for growth in high (>25mM) calcium, contains 9 or 10 putative membrane spanning regions"                         |             |             |             | 1           | 1.277996512 |
| 0.906009911 | 0.967136228                                                                                                                               | 0.599785236 | 1           | 1.004671615 | 1.065827774 |             |
| 0.853558443 | 0.926566123                                                                                                                               | 1           | 1.357821539 | 1.176940103 | 0.965473802 |             |
| 0.844126766 | 1                                                                                                                                         | 1.086901393 | 1.118161177 | 0.888240147 | 1.054900209 |             |
| 1.399557557 | 0.881800855                                                                                                                               | 0.92162217  | 1.572835061 | 1           | 1.214311668 |             |
| 1.029806925 | 1.260606445                                                                                                                               | 1.358169444 | 1.209780681 | 1           | 0.959667944 |             |
| 0.758011749 | 0.790842957                                                                                                                               | 0.790965386 | 0.363832013 | 1           | 0.941721532 |             |
| 0.602312725 | 0.75983952                                                                                                                                | 0.656277945 | 0.537585338 | 0.845852802 |             |             |
| YLR079w     | YLR079w::SIC1::P40 inhibitor of Cdc28p-Clb5 protein kinase complex                                                                        |             |             |             |             |             |
| 1           | 0.783081747                                                                                                                               | 1.141213102 | 0.968565693 | 0.903432443 | 1           |             |
| 1.029178103 | 0.975195759                                                                                                                               | 1.006633702 | 1           | 0.840711741 | 1.052955014 |             |
| 1.432353785 | 0.855414668                                                                                                                               | 1           | 1.025066004 | 1.315162611 | 1.502979234 |             |
| 1.399000035 | 1                                                                                                                                         | 0.769381736 | 0.937260897 | 1.355566668 | 0.948682424 |             |
| 0.964514172 | 1.149522487                                                                                                                               | 0.984529074 | 0.746649719 | 1.123273657 | 1           |             |
| 0.805645064 | 1.128012409                                                                                                                               | 0.938332037 | 0.743023914 | 1.627808309 | 1           |             |
| 0.790325119 | 0.642820339                                                                                                                               | 0.688971378 | 0.941642831 | 0.821810756 | 0.988579451 |             |
| YBR038W     | YBR038W::CHS2::chitin synthase 2                                                                                                          |             |             |             | 1           | 1.685273197 |
| 1.411821737 | 1                                                                                                                                         | 1.420689229 | 1.305360838 | 1.377826579 | 1.553164732 |             |
| 1.320127229 | 1.723123788                                                                                                                               |             | 1.856322072 | 1           | 1.575114361 |             |
| 1.85794923  |                                                                                                                                           |             |             | 1           | 0.956872703 |             |
| 0.745156265 | 0.794429135                                                                                                                               | 1.016135582 | 1.008149293 | 1           | 0.90094691  |             |
| 0.600466642 | 0.37322267                                                                                                                                | 0.816643811 | 0.849008202 |             | 0.851070739 |             |
| 0.687632276 | 1.209521525                                                                                                                               | 0.889439764 |             | 0.504359402 |             |             |
| YBR040W     | "YBR040W::FIG1::Factor-Induced Gene 1: expression is induced by the mating pheromones, a and alpha factor; required for efficient mating" |             |             |             | 1           |             |
| 0.99664008  | 0.953115997                                                                                                                               | 1.195031287 | 0.934731865 | 1           | 1.016867935 |             |
| 1.027169719 | 0.998289585                                                                                                                               | 0.989515998 | 1           | 1.120360364 | 1.067067148 |             |
| 0.824194153 | 1.099197893                                                                                                                               | 1           | 1.249172591 | 1.053638574 | 0.961507164 |             |
| 1.120953988 | 1                                                                                                                                         | 0.620042126 | 0.501137242 | 0.449948032 | 0.623352823 |             |
| 1.016492902 | 0.849714055                                                                                                                               | 0.830359723 | 1.06125531  | 0.96717396  | 1           |             |
| 0.410745321 | 0.767407694                                                                                                                               |             |             | 1           | 1.288044872 |             |
| 1.895279482 |                                                                                                                                           | 0.648837381 |             |             |             |             |
| YBR054W     | YBR054W::YRO2::Homolog to HSP30 heat shock protein Yro1p                                                                                  |             |             |             | 1           |             |
| 1.424287248 | 0.975239828                                                                                                                               | 1.331713195 | 1.338782582 | 1           | 1.338296387 |             |
| 1.345798762 | 1.059599573                                                                                                                               | 1.554036245 | 1           | 1.237359739 | 1.496640632 |             |
| 1.414856965 | 1.645781817                                                                                                                               | 1           | 2.21334602  | 2.720488828 | 3.284381241 |             |
| 2.536876183 | 1                                                                                                                                         | 1.189710339 | 1.027104699 | 1.208350204 | 1.699877009 |             |
| 1.248795225 | 1.26280362                                                                                                                                | 1.788345879 | 1.997007646 | 1.487887982 | 1           |             |
| 1.120451023 | 0.914971341                                                                                                                               | 0.651519069 | 0.836880934 | 0.621109237 | 1           |             |
| 1.275264676 | 0.803382232                                                                                                                               | 0.702551456 | 0.930507919 | 0.790337865 | 0.952678964 |             |
| YBR056W     | YBR056W::YBR056W::molecular_function unknown                                                                                              |             |             |             | 1           | 1.30640761  |
| 1.622398963 | 1.879719075                                                                                                                               | 1.470339256 | 1           | 1.688688685 | 1.973838111 |             |



1.93416188 1.447386667 1 1.192355249 2.205477874 2.141016607  
1.881384732 1 1.855509125 1.958551721 1.784555071 4.526505806 1  
2.336290929 3.195743086 3.735188279 2.55476586 1 1.019295655  
1.425157131 1.857225189 0.760560819 1.364063447 1 1.194790012  
1.32850411 1.970806858 1.254718056 0.520472827 1 1.312739152  
1.248905642 1.550378406 1.063213526 1.365369597 0.992082006  
YNL216W "YNL216W::RAP1::DNA-binding protein involved in either activation or  
repression of transcription, depending on binding site context. Also binds  
telomere sequences and plays a role in telomeric position effect (silencing) and  
telomere structure." 1 0.873912386 0.699279452 0.86616858 1  
0.818073147 0.829475634 0.725460299 0.670358003 1 0.726614585  
0.731844908 0.454982844 0.987867563 1 0.752822729 0.583924866  
0.553902386 1 0.955253316 0.594730315 0.836169644 1.065278498 1  
0.925055032 0.777120627 0.872801634 1.074550057 0.962693449 1  
0.759399358 0.447494963 0.555744997 0.574781493 0.4978895 1  
0.958250775 0.79169086 1.256696463 0.945760609 1.148904496 0.769673503  
YNL218W YNL218W::MGS1::Maintenance of Genome Stability 1 1  
0.812698722 0.738297956 1.122680552 0.644390833 1 0.934685731  
0.96498185 0.824519257 1 0.871967271 0.831841413 0.520179303  
1.133231717 1 2.428636543 0.658669135 0.523547661 1  
1.83561974 0.830837991 0.948013004 1.162885249  
1.108201371 0.943475793 1 1.185856877 0.941129524 1.387763538  
1.850448041 0.980521691 1 0.724273474 0.641531523 1.093466933  
0.668556496 0.814330326  
YNL220W YNL220W::ADE12::adenylosuccinate synthetase 1 1.347908976  
0.931544796 1.044590138 0.904816212 1 1.257055363 1.066247332  
0.868232433 0.816022955 1 1.710833489 1.623868675 0.631216064  
0.687024211 1 2.50222434 0.383985226 1.106871619 0.447677328 1  
2.626860442 0.953590089 0.774617506 1 1.050489619 1.258268168  
0.877470445 1.51139101 1.462024504 1 1.052163271 1.202581395  
0.908419066 0.823738303 1.819952513 1 1.482281087 1.587653702  
1.105390593 2.105739161 3.075526864 1.013972585  
YLR093C YLR093C::NYV1::Synaptobrevin (v-SNARE) homolog involved in vacuolar  
vesicle fusion 1 1.01459212 1.351502566 1.117039033 1.63831991 1  
1.05377791 1.080746058 1.46494146 1.510632253 1 0.943150765  
1.236867565 1.587243112 1.258264431 1 1.254135014 1.064082819  
1.343615557 1.785356284 1 1.972350928 2.122794478 3.221865924  
1.887958339 1 0.981139707 1.250068526 0.888647234 0.747720391  
0.978158378 1 1.046961092 1.349480683 1.53041063 1.096234959  
1.763624302 1 1.218311946 1.320737379 1.098736434 1.272463881  
1.775403577 1.372978396  
YNL234W YNL234W::YNL234W::molecular\_function unknown 1 0.835471893  
0.802448718 0.937088356 1 0.793310306 0.849713797  
1.296884696 1 1.064157566 0.817269313 1.083721048 1.446266306 1  
0.918778005 1.066376932 0.893579514 1 1.407213632 1.483424342  
1.097037645 0.640444984 1 1.327333715 1.186779746 0.868819479  
0.947670841 0.803013143 1 0.989922572 1.222716633 0.97057405  
1.31092789 1.238820454 1 1.434202018 1.289487064 1.592085883  
1.174363251 1.131701085  
YLR095C YLR095C::IOC2::Iswi One Complex 1 1.018867729 1.019593213  
1.249606605 1.018472774 1 1.150727343 0.949842024 1.118360622 1  
1.040798172 0.787718631 1.203395623 1 0.525411521  
0.811695224 0.839472728 1 1.112878984 1.259240468 0.897427708  
0.94130086 1 1.07912683 0.906376431 1.046192332 1.249033041 1  
0.9879592 0.786487804 0.916299523 0.924829407 0.839119217  
0.929473789 0.854547144 0.919653492 1.15303456 0.943496042 0.721514177

YNL236W "YNL236W::SIN4::involved in positive and negative regulation of transcription, possibly via changes in chromatin structure; regulation of YGP1 expression" 1 1.646071217 1.286209573 1.158255266 1.274243932 1  
1.313254782 1.149696282 1.061718121 1.180995279 1 1.420518725  
1.346627542 1.063134422 1.191973392 1 1.426505743 3.60311678  
1.015251106 0.858404702 1 1.323733075 1.367448465 0.782137387 1  
0.98941887 1.055124138 1.157886706 1.180990812 1  
1.190278501 0.885125378 0.845317389 1.658874036 1 1.277421791  
1.353605218 0.875558697 1.752131229 1.743377759 1.038490055

YLR097C YLR097C::YLR097C::molecular\_function unknown 1 0.945841896  
0.933811085 0.943597509 1.430882312 1 0.973475376 0.941145403  
1.011213681 1.208559284 1 0.808415582 0.974801261 1.187567405  
1.074890601 1 1.960945505 2.047937659 1.720400157 2.08550378 1  
1.465700449 2.291612089 2.486573999 1.958161487 1 0.967017476  
1.316825324 1.023167599 1.004942673 1.267115205 1 1.027199085  
1.412587716 1.350145159 1.28384663 1.014192343 1 1.362692959  
1.347031291 0.956313146 1.753339121 1.47717772

YNL238W "YNL238W::KEX2::prohormone processing; golgi localization marker, dispensable for meiotic recombination but partially required for meiosis I and/or meiosis II" 1 0.834863845 0.690885409 0.869078785 0.625352262 1  
0.816603339 0.831766733 0.629641262 1 0.900936597 0.733784461  
0.417019161 0.924422273 1 1.07630482 0.538872646 1.142456319  
0.601261042 1 1.130380985 0.825126793 0.718815688 0.761537837 1  
0.984608955 0.685676036 0.885440913 1.116950327 0.716928765 1  
0.699791827 0.578127355 0.659665078 0.642335924 1 0.721801445  
0.678414154 0.901947231 0.785006917 0.837068427 0.727643518

YLR099C YLR099C::ICT1::Increased Copper Tolerance; Similar to Ecm18p 1  
0.84889383 0.854361444 0.58544942 0.510027709 1 0.97185434  
0.652327856 1 1.751395647 2.088495268 1.623479464 1.204540047 1  
1.22865323 0.755590864 1.286643636 1.634969884 0.40862263  
0.761507133 0.40586658 0.339185815 1 0.829210255 0.790248656  
1.165885981 1.128966784 0.847008973 1 0.991550602 0.864134561  
2.571422549 1.112507867 0.891398062 1 1.172567801 1.052977702  
1.410130849 1.307175626 0.910502464 1.357217158

YNL240C YNL240C::NAR1::Nuclear architecture related protein with homology to human Narf (Nuclear prelamin A Recognition Factor) 1 1.439503148  
1.294080792 1.053373115 0.891325571 1 1.176014025 1.090026573  
1.04664869 1.133900657 1 1.391167788 1.188306681 1.077624081  
1.13652059 1 0.766150114 0.705559901 0.606454715 0.597278376 1  
0.75416755 0.810886358 1 1.010375696 0.906723837 1.156274041  
1.31784929 0.867395014 1 1.202301604 0.858043562 1.073590588  
1.685576253 0.689271538 1 1.041151168 0.681767964 1.261787891  
0.280053198 0.56406141 0.832718402

YBR058C YBR058C::UBP14::Functional homolog of mammalian isopeptidase T; may facilitate proteolysis by preventing unanchored ubiquitin chains from competitively inhibiting polyubiquitin-substrate binding to the 26S proteasome 1  
0.962611649 0.798372601 1.230868422 0.764387221 1 1.12058741  
1.124755254 0.829731778 0.952802228 1 0.902193416 1.006046189  
0.547685835 1.132627133 1 1.888831097 1.044059646  
0.610023495 1 0.918852647 0.900022496 0.787356191  
0.857610692 0.940435665 1 1.023985897 1.194252778 0.762732774  
0.867396401 1.164518708 1 0.925651352 1.009103839 1.072085995  
1.197943635 0.818651427 0.704877326

YNL242W YNL242W::APG2::Defective in autophagy; required for sporulation 1  
0.843928043 0.913914914 1.149063699 0.708314987 1 1.062942522  
0.81672958 0.752498662 1 1.14046427 1.176263868 0.86034625  
0.891410877 1.207138699 1.432030854 1 1.450783231

|              |                                                                                                                                 |             |             |             |             |   |
|--------------|---------------------------------------------------------------------------------------------------------------------------------|-------------|-------------|-------------|-------------|---|
|              | 1                                                                                                                               | 1.089216207 | 1.253714657 | 1.498377266 | 0.786781648 |   |
| 0.9247111116 | 1                                                                                                                               | 1.325824407 | 0.79460573  | 1.394737384 | 1.211626862 |   |
| 0.438322463  | 1                                                                                                                               | 1.26971451  | 1.076168557 | 1.029152038 | 0.556480024 |   |
| 1.318265206  | 1.007843244                                                                                                                     |             |             |             |             |   |
| YLR101C      | YLR101C::YLR101C::molecular_function unknown                                                                                    | 1           | 1.173324051 |             |             |   |
| 1.383016643  | 0.935382364                                                                                                                     | 1           | 0.943209809 | 0.927871876 | 1.503880414 |   |
| 1.572568598  | 1                                                                                                                               | 0.995363062 | 1.401826583 | 1.95512219  | 1.09508872  | 1 |
| 1.219530722  | 0.957923279                                                                                                                     | 1.028416986 | 1.778099869 | 1           | 1.628118864 |   |
| 3.759981806  | 2.190772628                                                                                                                     | 1.042295951 | 1           | 0.589227526 | 0.815807677 |   |
| 0.740346337  | 0.78413096                                                                                                                      | 0.813739752 | 1           | 1.016195272 | 1.728294773 |   |
| 1.587808814  | 2.20081986                                                                                                                      | 2.261655347 | 1           | 0.936512389 | 1.325317    |   |
| 1.807356105  | 2.252823055                                                                                                                     | 1.3594479   | 1.532342    |             |             |   |
| YNL244C      | YNL244C::SUI1::translation initiation factor 3 (eIF3)                                                                           | 1           | 1.237401    |             |             |   |
| 1.703012109  | 0.972776031                                                                                                                     | 2.268565732 | 1           | 1.03066939  | 0.983471012 |   |
| 1.742359534  | 1.573031293                                                                                                                     | 1           | 0.97155057  | 0.9216169   | 1.382069411 |   |
| 1.101598283  | 1                                                                                                                               | 0.746094716 | 0.382287212 | 0.407234768 | 0.838800174 | 1 |
| 1.768092132  | 1.480405603                                                                                                                     | 1.629186304 | 1.423080938 | 1           | 0.807756771 |   |
| 0.917136106  | 0.574477715                                                                                                                     | 0.828099197 | 0.962609178 | 1           | 0.776762449 |   |
| 1.526056756  | 0.970173502                                                                                                                     | 0.958498162 | 2.379598166 | 1           | 0.705451963 |   |
| 0.943505766  | 0.740670737                                                                                                                     | 1.806588697 | 0.981968697 | 1.42026211  |             |   |
| YBR060C      | YBR060C::ORC2::origin recognition complex subunit 2                                                                             | 1           |             |             |             |   |
| 0.798785856  | 0.928121069                                                                                                                     | 1.013832041 | 0.920376106 | 1           | 0.991353833 |   |
| 1.059927261  | 0.889950679                                                                                                                     | 0.839320701 | 1           | 0.920638543 |             |   |
| 0.995223745  | 1                                                                                                                               | 0.883207744 | 0.724248291 | 0.880127333 | 0.855577448 |   |
| 0.593725159  | 0.661985657                                                                                                                     | 0.591232503 | 0.487036047 | 1           | 1.13952212  |   |
| 1.043010089  | 0.858234959                                                                                                                     | 0.923091168 | 1.065555693 |             | 1.057595615 |   |
| 0.914940371  | 1.068731263                                                                                                                     | 1.033563243 | 1           | 0.792972852 | 0.874182938 |   |
| 1.104543871  | 0.973894132                                                                                                                     | 1.13313718  | 0.849355305 |             |             |   |
| YLR103C      | YLR103C::CDC45::Cdc45p assembles into a complex with Cdc46p/Mcm5p                                                               | 1           |             |             |             |   |
| 1.161452717  | 1.219934726                                                                                                                     | 1.450251254 | 1           | 1.36227081  | 1.304751524 |   |
| 1.459386859  | 1                                                                                                                               | 0.754639855 | 0.896892917 | 0.880951786 | 1.574309925 | 1 |
| 0.702770363  | 0.710898974                                                                                                                     | 1.038736139 | 1           | 0.819470887 | 0.675340241 |   |
| 1.720770407  | 1                                                                                                                               | 0.93551482  | 1.150869987 | 1.164747442 | 0.846671602 |   |
| 1.270470338  | 1                                                                                                                               | 1.053110746 | 0.969213493 | 1.224444436 | 0.882321327 |   |
| 0.602073354  | 1                                                                                                                               | 1.115125561 | 0.825436914 | 1.060408368 |             |   |
| 1.140938049  |                                                                                                                                 |             |             |             |             |   |
| YNL258C      | "YNL258C::DSL1::dsl1 mutations are suppressed by a dominant allele of SLY1, called sly1-20"                                     | 1           | 0.871002048 | 0.928247905 | 1.15838404  |   |
| 1.100874565  | 1                                                                                                                               | 0.973488525 | 1.154970468 | 0.795049087 | 1           |   |
| 0.954095942  | 1.043646352                                                                                                                     | 0.744503717 | 1.061579277 | 1           |             |   |
| 0.8799443    | 1.240378433                                                                                                                     | 1           | 1.4865484   | 1.523741039 | 1.635080614 | 1 |
| 1.006337326  | 1.137487263                                                                                                                     | 0.908719362 | 0.834960432 | 1.040840778 | 1           |   |
| 1.163241309  | 1.141193387                                                                                                                     | 1.100136046 | 0.913685702 | 1.133753398 | 1           |   |
| 1.274569598  | 1.526308735                                                                                                                     | 1.129407107 | 1.087858806 | 1.56664543  | 1.246012933 |   |
| YBR062C      | YBR062C::YBR062C::molecular_function unknown                                                                                    | 1           | 1.081695302 |             |             |   |
| 1.464370513  | 1.162226291                                                                                                                     | 1.519957424 | 1           | 1.13208571  | 1.015891003 |   |
| 1.784424045  | 1.449529189                                                                                                                     | 1           | 1.157033083 | 1.568621415 | 2.090457849 |   |
| 1.24749758   | 1                                                                                                                               | 1.128099682 | 1.220302226 | 1.597133149 | 1.598292145 | 1 |
| 1.259256201  | 2.278960359                                                                                                                     | 2.327211594 | 0.915271266 | 1           | 1.344315497 |   |
| 1.856748156  | 1.008141697                                                                                                                     | 0.729887533 | 1.089454892 |             | 0.922690628 |   |
| 2.004441767  | 1.07710945                                                                                                                      | 0.957886178 | 1.320664097 | 1           | 1.527496055 |   |
| 2.556345551  | 1.575492779                                                                                                                     | 1.696322231 | 2.345883099 | 1.461416482 |             |   |
| YLR117C      | "YLR117C::CLF1::SYnthetic lethal with cdcForty; Crooked neck Like Factor, an ortholog of the Drosophila crooked neck gene, crn" | 1           |             |             |             |   |
| 0.844331652  | 0.947098324                                                                                                                     | 1.038011746 | 1.052536003 | 1           | 0.970051149 |   |
| 0.996065457  | 0.883671036                                                                                                                     | 0.910643911 | 1           | 0.89905196  | 1.016948098 |   |
| 0.846304788  | 1.06920917                                                                                                                      | 1           | 1.095349821 | 0.933501548 | 0.966327582 |   |

|             |                                                                                                                   |             |             |             |                                       |
|-------------|-------------------------------------------------------------------------------------------------------------------|-------------|-------------|-------------|---------------------------------------|
| 0.921857483 | 1                                                                                                                 | 1.097905278 | 0.784890623 | 0.707335916 | 1                                     |
| 0.931026796 | 1.176651466                                                                                                       | 0.809605341 | 0.864038979 | 0.970321004 | 1                                     |
| 0.994972087 | 1.1709895                                                                                                         | 1.110289977 | 1.136103891 | 1.27735641  | 1                                     |
| 1.050613864 | 1.153548119                                                                                                       | 1.080073508 | 1.15106231  | 1.028858158 |                                       |
| YBR064W     | YBR064W::YBR064W::molecular_function unknown                                                                      |             |             |             | 1 1.188290843                         |
| 1.092585833 | 1.180663085                                                                                                       | 1.323808648 | 1           | 1.065351186 | 1.180994613                           |
| 1.248624709 | 1.109946197                                                                                                       | 1           | 1.000637249 | 0.982352413 | 0.932723878                           |
| 1.010383403 |                                                                                                                   |             | 0.509979451 | 0.584502091 | 1                                     |
| 0.8132638   | 1.00165039                                                                                                        | 1           | 0.756055606 | 0.694195962 | 0.846575949                           |
| 0.875959167 | 1.068082632                                                                                                       | 1           | 0.963994355 | 0.973133202 | 0.903062086                           |
| 0.940431106 | 1                                                                                                                 | 1.028585605 | 1.066037124 | 1.161306101 | 0.803630933                           |
| 1.100245016 |                                                                                                                   |             |             |             |                                       |
| YLR119w     | YLR119w::SRN2::Suppressor of rna1-1 mutation                                                                      |             |             |             | 1 1.389160882                         |
| 1.664275322 | 1.303932405                                                                                                       | 1.91509695  | 1           | 1.407903319 | 1.246461876                           |
| 1.630874112 | 1                                                                                                                 | 1.451692983 | 1.521328841 | 2.330326015 | 1.508210066 1                         |
| 1.428745878 | 1.149863289                                                                                                       | 0.942376021 | 1.659181972 | 1           | 2.190964572                           |
| 2.241938966 | 2.85263743                                                                                                        | 1.621349218 | 1           | 0.824154348 | 1.197094446                           |
| 0.620739471 | 0.509744649                                                                                                       | 0.859909883 | 1           | 1.234558792 | 1.74758287                            |
| 1.874081566 | 1.611373771                                                                                                       | 1.93204937  | 1           | 1.371130596 | 1.48961478                            |
| 1.254351033 | 1.683578022                                                                                                       | 1.66004268  | 1.355465933 |             |                                       |
| YBR078W     | YBR078W::ECM33::ExtraCellular Mutant                                                                              |             |             |             | 1 1.250658667                         |
| 0.721168326 | 1.101974983                                                                                                       | 0.739825189 | 1           | 1.0906521   | 0.984841831                           |
| 0.773488608 | 0.866726026                                                                                                       | 1           | 1.087072782 | 0.790464822 | 0.644932862                           |
| 0.847408583 | 1                                                                                                                 | 0.966246622 | 2.016313961 | 1.613662853 | 0.564457654 1                         |
| 0.481258225 | 0.148454423                                                                                                       | 0.141700819 | 0.294629916 | 1           | 1.22016308                            |
| 0.861308459 | 1.127530492                                                                                                       | 1.678282178 | 0.815018637 |             | 1.237861846                           |
| 1.137919313 | 1.07163077                                                                                                        | 1.056723145 | 0.686490136 | 1           | 1.058307463                           |
| 0.868827712 | 0.875218754                                                                                                       | 0.841505736 | 1.022360078 | 0.542886884 |                                       |
| YLR121C     | YLR121C::YPS3::Gpi-anchored aspartic protease (Yapsin 3)                                                          |             |             |             | 1                                     |
| 0.918679415 | 1.079691901                                                                                                       | 0.875323401 | 0.84072025  | 1           | 0.913444541                           |
| 0.83235085  |                                                                                                                   | 0.770377998 | 1           | 1.181272375 | 1.037228661 1.241506008               |
| 0.815409074 | 1                                                                                                                 | 0.81326633  | 0.681020211 | 0.781471917 | 1.110934098 1                         |
| 1.672208217 | 2.25651515                                                                                                        | 2.434241685 | 1.65663018  | 1           | 1.13739418                            |
| 1.060964738 | 1.260717563                                                                                                       | 1.006364105 | 1.164338675 | 1           | 0.877416001                           |
| 1.014408679 | 1.160392315                                                                                                       | 0.949387889 | 0.734735194 | 1           | 1.088686859                           |
| 1.09403658  | 1.01375617                                                                                                        | 1.096442527 | 1.148216263 | 1.152321171 |                                       |
| YBR080C     | YBR080C::SEC18::cytoplasmic protein involved in protein transport between ER and Golgi; ATPase                    |             |             |             | 1 1.122832205 1.028135965 1.351904758 |
| 1.05434591  | 1                                                                                                                 | 1.272246684 | 1.276739255 | 1.004631077 | 0.833663844 1                         |
| 0.952570858 | 1.369156165                                                                                                       | 0.936588786 | 1.029847326 |             | 0.971667532                           |
| 1.097391944 | 0.86718023                                                                                                        | 1           | 0.845366839 |             | 1                                     |
| 1.018493839 | 1.234850588                                                                                                       | 1.283730352 | 1.045682299 | 0.964990308 | 1                                     |
| 0.977065118 | 0.935914884                                                                                                       | 0.833548205 | 0.794670852 | 0.51769642  | 1                                     |
| 1.275151031 | 1.320383241                                                                                                       | 1.15303766  | 1.003909012 | 1.126100605 | 0.806449707                           |
| YLR123C     | YLR123C::YLR123C::molecular_function unknown                                                                      |             |             |             | 1                                     |
| 1.502991251 | 1.468674845                                                                                                       | 1           | 1.282582508 |             | 1.540309297                           |
| 1.449739603 | 1                                                                                                                 | 1.24077979  | 1.2575577   | 1.371707566 | 1.244015561                           |
| 0.474665151 | 0.182078482                                                                                                       |             | 0.574874999 | 1           | 1.53462448 2.727227395                |
| 1.377294096 | 1.384870857                                                                                                       | 1           | 0.866891432 | 0.982874787 | 1.060016678                           |
| 1.124206142 | 1                                                                                                                 | 0.502047107 | 0.538429761 | 0.601473576 | 0.804163044 1                         |
| 0.905146165 | 0.885451833                                                                                                       | 1.020871355 | 0.707452619 |             | 1.330072903                           |
| YBR082C     | YBR082C::UBC4::One of several UBC genes encoding ubiquitin-conjugating enzymes that attach ubiquitin to proteins. |             |             |             | 1 1.258898518                         |
| 1.538782422 | 1.042393582                                                                                                       | 1.45181271  | 1           | 0.928828737 | 1.182439933                           |
| 1.604676625 | 1.309783008                                                                                                       | 1           | 0.891468324 | 1.364634616 | 2.27119977                            |
| 1.057984263 | 1                                                                                                                 | 2.053394842 | 1.67068506  | 1.766684589 | 3.307179989 1                         |
| 1.350969393 | 2.342900354                                                                                                       | 2.036095487 | 1.795011448 | 1           | 1.247294136                           |

|             |                                                                                                                                                                                                         |             |             |             |             |
|-------------|---------------------------------------------------------------------------------------------------------------------------------------------------------------------------------------------------------|-------------|-------------|-------------|-------------|
| 1.069326829 | 0.985002188                                                                                                                                                                                             | 0.738450387 | 1.174915113 | 1           | 1.284587638 |
| 1.929892399 | 1.063052696                                                                                                                                                                                             | 0.918857259 | 1.357406258 | 1           | 1.327174599 |
| 1.525441722 | 1.144163179                                                                                                                                                                                             | 1.48914627  | 1.215678813 | 2.020940269 |             |
| YBR084CA    | YBR084CA::RPL19A::Homology to rat L19                                                                                                                                                                   |             | 1           | 0.989395042 |             |
| 0.996551016 | 1.028319418                                                                                                                                                                                             | 1.139500031 | 1           | 0.990870296 | 0.988715857 |
| 1.09299108  | 0.992160661                                                                                                                                                                                             | 1           | 0.839982723 | 0.888243894 | 0.722972544 |
| 0.928534168 | 1                                                                                                                                                                                                       | 0.648974175 | 0.364178086 | 0.293715445 | 0.606144705 |
| 1.050543181 | 0.801901523                                                                                                                                                                                             | 0.513637066 | 0.723923328 | 1           | 0.879458982 |
| 0.704898906 | 0.799321718                                                                                                                                                                                             | 0.868983378 | 0.870472719 | 1           | 1.253445354 |
| 1.792363008 | 0.942498319                                                                                                                                                                                             | 0.952358041 | 2.039024389 | 1           | 1.02914843  |
| 1.208346711 | 0.919479632                                                                                                                                                                                             | 1.594076102 | 1.077224778 | 1.107664347 |             |
| YBR085W     | YBR085W::AAC3::highly homologous to PET9 (AAC2) and AAC1; expression occurs only under anaerobic conditions                                                                                             |             | 1           | 2.058177016 | 1.43216208  |
| 1.433206923 | 1.13364984                                                                                                                                                                                              | 1           | 1.641440225 | 1.648509393 | 0.959428663 |
| 1.085792182 | 1                                                                                                                                                                                                       | 1.339526752 | 1.164651579 | 1.007422058 | 0.848165699 |
|             |                                                                                                                                                                                                         |             |             | 1           | 0.871405749 |
| 0.77066356  | 0.964942265                                                                                                                                                                                             | 1.237179793 | 1.193752589 | 1           | 0.729732971 |
| 0.656080397 | 0.395417464                                                                                                                                                                                             | 0.392081871 | 0.664284908 | 1           | 1.162600282 |
| 0.774989918 | 0.814836063                                                                                                                                                                                             | 0.99173893  | 0.843526278 | 0.929037055 |             |
| YBR087W     | YBR087W::RFC5::RFC is a multisubunit DNA binding protein and ATPase that acts as a processivity factor for DNA polymerases delta and epsilon and loads proliferating cell nuclear antigen (PCNA) on DNA |             |             | 0.994879931 |             |
| 0.878028709 | 0.986204805                                                                                                                                                                                             | 1.177699658 |             | 0.940735668 | 0.787539902 |
| 0.996384926 | 1.035825767                                                                                                                                                                                             |             | 0.605227233 | 0.688573791 | 0.497809115 |
| 0.884027064 |                                                                                                                                                                                                         | 0.91489381  |             |             |             |
| 1           | 0.954334143                                                                                                                                                                                             | 0.957405791 | 0.825256813 | 0.865510292 | 0.96872535  |
| 1.076255185 | 1.137967761                                                                                                                                                                                             | 0.791004716 |             | 1.655362472 | 1           |
| 1.392448662 | 1.025695765                                                                                                                                                                                             | 1.620602362 | 1.290840919 | 1.073514981 | 1.207639699 |
| YHR007C     | YHR007C::ERG11::cytochrome P450 lanosterol 14a-demethylase                                                                                                                                              |             | 1           |             |             |
| 1.429646377 | 0.720430396                                                                                                                                                                                             | 1.291688158 | 0.73374529  | 1           | 1.354634633 |
| 1.140460514 | 0.826484825                                                                                                                                                                                             | 0.926225868 | 1           | 0.720062467 | 0.556911425 |
| 0.386843234 | 1.003030076                                                                                                                                                                                             | 1           | 0.652696521 | 0.637103536 | 0.674390408 |
| 0.791401115 | 1                                                                                                                                                                                                       | 0.481960687 | 0.18347983  | 0.191575579 | 0.835380457 |
| 0.448069517 |                                                                                                                                                                                                         | 0.427915472 | 2.137826524 | 0.828006604 | 1           |
| 0.083537339 | 0.075211995                                                                                                                                                                                             | 0.711868106 | 1.021368854 | 1           | 0.389360727 |
| 0.145615544 | 1.157399825                                                                                                                                                                                             | 1.298055239 | 0.803023078 | 0.649712994 |             |
| YAL051W     | YAL051W::OAF1::transcription factor                                                                                                                                                                     |             | 1           | 0.903493471 | 0.927880669 |
| 0.905646822 | 1.07988141                                                                                                                                                                                              | 1           | 0.935104576 | 1.072862185 | 0.970965928 |
| 0.898419824 | 1                                                                                                                                                                                                       | 0.948606285 | 0.969909182 | 1.100851883 | 1.028928991 |
| 0.955122897 | 0.796651407                                                                                                                                                                                             | 0.898753959 | 0.839761945 | 1           | 1.208735597 |
| 1.054108275 | 0.978537002                                                                                                                                                                                             | 1.072499248 | 1           | 0.943895555 | 1.081581329 |
| 1.101952787 | 0.994001807                                                                                                                                                                                             | 1.004081338 | 1           | 0.951780994 | 0.853646169 |
| 0.968138097 | 0.964455316                                                                                                                                                                                             |             | 0.985151274 | 1.007195796 | 0.678255596 |
| 1.365834085 | 1.01309692                                                                                                                                                                                              |             |             |             |             |
| YAL051W     | YAL051W::OAF1::transcription factor                                                                                                                                                                     |             |             |             |             |
|             |                                                                                                                                                                                                         |             | 1           | 0.64930435  |             |
| 0.611604576 | 0.838258675                                                                                                                                                                                             | 1           |             |             | 0.929740978 |
| 0.632666156 | 0.793192877                                                                                                                                                                                             | 0.961199808 |             | 2.540185244 |             |
| YFL035CB    | YFL035CB                                                                                                                                                                                                | 1           | 0.684626327 | 0.737273887 | 0.656417608 |
| 0.662757887 | 0.578534441                                                                                                                                                                                             | 0.927470146 | 0.937798526 | 1           | 0.594491179 |
| 0.611824138 | 0.64874453                                                                                                                                                                                              | 0.826218835 | 1           | 0.711559552 | 0.450524965 |
| 0.416464969 | 0.804054733                                                                                                                                                                                             | 1           | 1.194494718 | 0.918967346 | 0.87586782  |
| 0.983292049 | 1                                                                                                                                                                                                       | 1.002531148 | 0.90994555  | 0.672261474 | 0.94836559  |
| 1.32159128  | 1                                                                                                                                                                                                       | 1.042709604 | 1.224307469 | 0.837345845 | 1.068979184 |
| 2.065700729 | 1                                                                                                                                                                                                       | 0.834195769 | 1.062934171 | 0.790795889 | 1.468382309 |
| 0.87509447  | 1.472799604                                                                                                                                                                                             |             |             |             |             |

YPR102C YPR102C::RPL11A::Homology to rat L11 and E. coli L5 1  
1.085752323 1.044892781 0.812524069 1.403792683 1 0.911928215  
0.810493279 1.215700873 1.105222145 1 0.825648143 0.862529577  
0.758521798 1.362855747 1 0.622425247 0.354834519 0.219948799  
0.560128703 1 1.247316138 0.982587173 0.671418056 0.844547785 1  
1.162625231 1.259689683 0.912736685 1.028570131 1.432879936 1  
1.105732269 1.59602796 0.79479851 0.686026338 1.375228972 1  
1.132473418 1.591763767 1.16537615 1.433517606 1.382105863 1.017475036  
YNL260C YNL260C::YNL260C::molecular\_function unknown 1 0.927123967  
1.316103335 0.947466718 1.495831138 1 0.836731387 0.91344133  
1.178309131 1.291578732 1 1.572856876 1.70822183 1.488961982  
1.18067323 1 1.465775832 0.92570632 0.740978766 1.062344605 1  
3.264425653 2.544150897 2.223081341 1.570786701 1 1.392885053  
2.110986661 1.215412098 0.787266061 1.020815937 1 1.876938793  
2.862328254 2.397411925 2.231372246 1.592340513 1 2.058817144  
1.270519584 0.507877284 1.095530684 1.17596308  
YNL262W YNL262W::POL2::DNA polymerase II 1 1.85527873 1.810116212  
1.740275272 1.924813968 1 1.65744408 1.537957787 1.918543084  
1.784976464 1 1.584005975 1.411049128 1.827337786 1.692791429  
0.820891539 1 1.00282177 1  
1.054592649 0.822910352 1.07315431 0.970673207 0.874985151 1  
1.23973617 1.263220304 1.314280866 1.426628023 1.092145273 1  
0.857738321 0.875491656 0.843972178 0.936090787 1.145316164  
YNL264C YNL264C::PDR17::involved in pleiotropic drug resistance by  
controlling lipids in various cellular compartments; putative  
phosphatidylinositol transfer protein. 1 1.1159086 1.108654362  
1.089825826 1.148185377 1 1.028520906 1.205428815 1.154513602 1  
1.203041179 1.217254237 1.137614433 1.089209975 1 1.626159791  
1.416459174 1.194125534 1.167700436 1 1.414026838 1.010286773  
0.716238394 1.152584201 1 1.056311803 1.192647994 1.264066129  
1.096923221 1.036728762 1 1.191463766 1.119866872 1.091579384  
0.970259271 1 1.352352589 1.126796454 0.964060295 0.8687925  
1.072670084 0.802071592  
YLR125W YLR125W::YLR125W::molecular\_function unknown 1 1.164749387  
1.16628682 1.27938939 1 1.064276158 1.258942922 1  
0.949497624 1.135382793 1  
1 1.256659639 1.714477769 1.363079081 0.857473968  
1 1.135308164 1.736596564 1.754059097 1.129237793 1.15173231 1  
1.233888468 1.786240728 1.46401874 0.689116088  
YNL266W YNL266W::YNL266W::molecular\_function unknown 1 1.1327603  
1.40347913 0.990037182 1.787170816 1 1.026690963 1.056349733  
1.774067513 1.503785386 1 1.119572795 1.376625392 1.891025598  
1.217781674 1 1.745881706 1.388165058 1.733848106 1.821531629 1  
1.962730191 2.871634265 1.117309186 1 1.146946752 1.345132918  
0.895959011 0.927973198 1 1.035843338 1.492706017 1.529792456  
2.266002392 1 2.113796282 1.591881438 1.415878467 1.58715285  
2.403050372 1.535844451  
YLR127C YLR127C::APC2::subunit of the Anaphase Promoting Complex; all known  
APC subunit co-immunoprecipitate with epitope-tagged Apc2. Apc2 shows similarity  
to cullins. 0.966560327 1.028352651 1.013040296 1.162036238  
1.101762512 1.096185264 1.038784293 0.93050851 1.116415231  
1.119064553 0.993281128 1.082761782 1 1.15973695 0.901251285  
1.072900132 1.316019945 1 1.372762282 2.284719273 1.602197288  
1.090236551 1 1.296953393 1.531032798 1.183501502 0.908156028  
1.199714253 1 1.39200577 1.170472954 1.195400195 1.048200357  
0.748359558 1 1.159547753 1.030835913 1.041100987 0.728150469  
1.252142274

YNL268W YNL268W::LYP1::lysine permease 1 0.932016094 0.649604055  
 0.951464107 0.524450569 1 0.945339433 1.100611546 0.696403825  
 0.775739177 1 0.940488793 0.790692201 0.590537985 0.707067248 1  
 1.098585352 0.99493154 1.172037879 0.462232665 1 0.888181634  
 0.824425773 0.655346059 0.438771464 1 1.180349518 0.944834296  
 1.305675986 1.35942479 0.885520489 1 0.765278717 0.657841244  
 0.793027796 0.665294809 0.414010877 1 0.994037701 0.741455052  
 1.05437827 0.681727788 0.682628388 0.696996707  
 YLR141w YLR141w::RRN5::involved in transcription of rDNA by RNA polymerase I.  
 UAF interacts directly with an upstream element of the promoter and mediates its  
 stimulatory function. 1 1.610339862 1.503917297 1.26821714 1.645267354 1  
 1.465801885 1.417273054 1.382501804 1.511904211 1 1.248369674  
 1.607433297 1.517141039 1.342752801 1 0.728101154 0.552081787  
 0.585143047 1.011419191 1 1.201850843 1.619905623 1.364235558  
 0.601891677 1 1.043947962 1.069248726 1.18475798 1.165557101  
 1.107434942 1 0.78951451 0.696334833 0.791964257 0.621937278  
 0.626455563 1 1.027092983 1.009270775 1.122283696 0.918174819  
 1.103956283 24.60503473  
 YNL282W YNL282W::POP3::RNase P and RNase MRP subunit 1 1.144499844  
 0.838066978 1.280254145 0.861054508 1 1.290480793 1.229042419  
 1.442600208 1.298717997 1 0.775547144 0.822422637 0.86847322  
 1.298231786 1 0.278996161 0.396337104 0.612397628 0.68644876 1  
 0.485158472 1.671292287 0.734883056 0.555052291 1 0.799716231  
 0.830265649 0.938032883 1.025488223 0.972532907 1 0.701434146  
 0.484530024 0.597547764 1.326935047 0.890840361  
 1.44204167 0.268219252 1.089373253 0.739902305  
 YNL284C YNL284C::MRPL10::Mitochondrial ribosomal protein MRPL10 (YmL10) 1  
 1.062404464 1.206985264 1.124030535 1.239736977 1 1.002993689  
 1.156307179 1.484490774 1.394071172 1 0.927226759 1.039431823  
 1.26763906 1.060827493 1 1.177742211 1.12970589 0.957846833  
 1.570912211 1 1.693948872 1.933548695 2.262127772 1.333220905 1  
 1.152805757 1.265619162 1.052784572 0.95132579 0.946514391 1  
 1.202846196 1.149354646 0.961764325 0.753929007 1.275938657 1  
 1.146618451 1.13072671 0.857669116 1.09214237 1.201919295 1.198729219  
 YLR143W YLR143W::YLR143W::molecular\_function unknown 1 0.733767491  
 0.713750399 1.057073428 0.793809656 1 0.919864275 1.008673495  
 0.75773956 0.855700804 1 0.720290852 0.763074081 0.507583021  
 0.923309982 1 0.564612309 0.610380351 0.539068851 1  
 0.722226311 0.461358264 0.592188192 1 0.947030463 0.994964309  
 1.026586799 1.054485627 1.038891146 1 0.982620604 0.716920798  
 0.864914562 1.021704052 0.766632433 1 0.795713643 0.729476875  
 0.986020071 0.81305928 0.87439974 0.830091564  
 YNL286W YNL286W::CUS2::cold sensitive U2 snRNA Supressor 1  
 1.057211415 1.348819327 1.239442046 1.395987204 1 1.206690698  
 1.143238752 1.395552075 1.525658957 1 1.051826345 1.303866497  
 1.474387395 1.451423911 1 0.95331876 0.470499871 0.759144087  
 0.943889249 1 1.330535958 1.101163344 0.856344368 1  
 0.873345774 1.073056968 0.924437724 0.859792798 0.964848424 1  
 1.018424341 1.055391123 2.058380185 1 0.997909482  
 0.740212355 1.141879086 1.030671377 1.077017537  
 YBR100W YBR100W::YBR100W::molecular\_function unknown 1.00842406  
 0.983938778 0.997386254 1.026938505 0.859616854 0.871016907  
 1.070583877 1.017240321 0.808979077 1.082044493 1.327491019  
 0.902627849 1 1.254301394 1.523870144 1 0.73803487  
 1.676322114 1.212575761 1.332992828 1.144058471 1.200267251  
 0.990885167 0.944432653 1 1.195415474 0.861146661 0.576015092

|         |                                                                                                                                                                                            |             |             |             |             |             |             |
|---------|--------------------------------------------------------------------------------------------------------------------------------------------------------------------------------------------|-------------|-------------|-------------|-------------|-------------|-------------|
|         | 0.767079044                                                                                                                                                                                | 1.585809441 | 1           | 1.228069419 | 1.15998971  | 1.001127998 |             |
|         | 1.214643581                                                                                                                                                                                | 1.228591071 | 1.117296244 |             |             |             |             |
| YLR145W | YLR145W::YLR145W::molecular_function unknown                                                                                                                                               |             |             |             |             | 1           | 0.913580526 |
|         | 1.274740883                                                                                                                                                                                | 0.913073169 | 1.593625517 | 1           | 0.846698421 | 1.004659737 |             |
|         | 1.279722606                                                                                                                                                                                | 1.583718229 | 1           | 0.775015486 | 0.955061215 | 1.381538818 |             |
|         | 1.049914958                                                                                                                                                                                | 1           | 1.020635394 | 0.585686787 | 1.037149109 | 1.371360642 | 1           |
|         | 1.58953495                                                                                                                                                                                 | 2.921045194 | 1.398906423 | 1.33639713  | 1           | 0.850059082 |             |
|         | 0.900882443                                                                                                                                                                                |             | 0.647624335 | 0.91047602  | 1           | 0.888366087 | 1.054119181 |
|         | 0.919645548                                                                                                                                                                                | 1.24648406  | 1.77517623  | 1           | 0.875922797 | 1.190498629 |             |
|         | 1.125033044                                                                                                                                                                                | 1.595924481 | 1.574559101 | 1.397495866 |             |             |             |
| YNL288W | YNL288W::CAF40::CCR4 Associated Factor 40 kDa                                                                                                                                              |             |             |             |             | 1           | 0.952427583 |
|         | 0.844233834                                                                                                                                                                                | 0.812225624 | 0.649624053 | 1           | 0.861412612 | 0.87636205  |             |
|         | 0.817839928                                                                                                                                                                                | 0.808570443 | 1           | 1.054718045 | 0.851392408 | 0.894734752 |             |
|         | 0.764957538                                                                                                                                                                                | 1           | 0.932900412 | 0.699722562 | 0.858294563 | 0.661327208 | 1           |
|         | 1.116059556                                                                                                                                                                                | 0.848570231 | 1.034992845 | 0.86037229  | 1           | 1.19961733  |             |
|         | 1.101749281                                                                                                                                                                                | 0.89280626  | 1.055299332 | 0.797976945 | 1           | 0.775259867 |             |
|         | 0.814165842                                                                                                                                                                                | 0.732254351 | 0.541187718 | 0.813186242 | 1           | 0.808385826 |             |
|         | 0.857498403                                                                                                                                                                                | 0.902029352 | 0.865033682 | 0.999748261 | 1.016599476 |             |             |
| YBR102C | YBR102C::EXO84::exocyst complex component; homolog in rat brain called rExo84.<br>pre-mRNA splicing factor.                                                                                |             |             |             |             | 1.060138109 | 0.95319068  |
|         | 0.992674623                                                                                                                                                                                |             | 1.362069    | 1.169776893 | 1.033484362 | 0.994937845 |             |
|         | 1.030815383                                                                                                                                                                                | 1.152911565 | 0.563248804 | 1.013253582 | 1           | 0.881467867 |             |
|         | 0.607287735                                                                                                                                                                                | 0.886201574 | 0.723714559 | 1           |             | 0.528742121 | 1           |
|         | 0.763241001                                                                                                                                                                                | 0.835420177 | 0.809600154 | 0.73699364  | 0.843442693 | 1           |             |
|         | 1.218965433                                                                                                                                                                                | 0.795400255 | 0.951713534 |             | 0.910421376 | 1           | 1.049419511 |
|         | 1.037648635                                                                                                                                                                                | 1.289863191 | 0.797874867 | 1.187326452 | 0.895763354 |             |             |
| YLR147c | YLR147c::SMD3::involved in snRNP biogenesis and pre-mRNA splicing                                                                                                                          |             |             |             |             |             |             |
|         | 0.712915168                                                                                                                                                                                | 1.176398985 | 0.733503796 | 1.318671246 |             | 0.713118776 |             |
|         | 0.856737929                                                                                                                                                                                | 1.733073798 | 1.165923447 |             | 0.659480693 |             | 1.135846155 |
|         | 0.964304179                                                                                                                                                                                | 1           | 0.678663083 | 0.572078691 | 0.543807723 | 0.924990895 | 1           |
|         | 1.26242809                                                                                                                                                                                 | 1.900187044 | 1.507262678 | 1.000115936 | 1           | 0.880626917 |             |
|         | 1.09765723                                                                                                                                                                                 | 0.690820379 | 0.726449022 | 0.967648008 | 1           | 0.95059345  |             |
|         | 1.15187665                                                                                                                                                                                 | 1.161175529 | 1.361830188 | 1.903155777 | 1           | 0.891747099 |             |
|         | 1.112916587                                                                                                                                                                                | 1.128987283 | 1.652793628 | 1.344176823 | 1.360719714 |             |             |
| YNL290W | YNL290W::RFC3::RFC is a DNA binding protein and ATPase that acts as a processivity factor for DNA polymerases delta and epsilon and loads proliferating cell nuclear antigen (PCNA) on DNA |             |             |             |             | 1           | 0.795924631 |
|         | 0.955187038                                                                                                                                                                                |             | 0.966015474 | 1           | 0.865657042 | 0.876263931 | 1.134599154 |
|         | 1.051670305                                                                                                                                                                                | 1           | 0.743045491 | 0.748295289 | 0.711406407 | 0.993051541 | 1           |
|         | 0.680339105                                                                                                                                                                                | 0.465604847 | 0.534185065 | 0.778924724 | 1           | 1.099534096 |             |
|         | 0.658269546                                                                                                                                                                                | 0.835505234 | 1.250604602 | 1           | 0.974922333 | 1.006751532 |             |
|         | 1.114667383                                                                                                                                                                                | 0.890386105 | 1.018492373 | 1           | 1.064334276 | 1.264638541 |             |
|         | 1.239135996                                                                                                                                                                                | 1.082683813 | 0.982604261 | 1           | 1.098082647 | 1.09465241  |             |
|         | 1.080081207                                                                                                                                                                                | 0.76082183  | 1.063695904 | 0.970191427 |             |             |             |
| YBR104W | YBR104W::YMC2::Mitochondrial carrier protein                                                                                                                                               |             |             |             |             | 1           | 1.422206044 |
|         | 1.115174603                                                                                                                                                                                | 1.230554048 | 1.276739949 | 1           | 1.106103102 | 0.915463661 |             |
|         | 1.31074123                                                                                                                                                                                 | 1.411842576 | 1           | 1.274512924 | 0.737977099 | 0.468124792 |             |
|         | 1.120983146                                                                                                                                                                                | 1           | 0.621785035 |             | 1           | 0.750632905 |             |
|         | 0.782083468                                                                                                                                                                                |             | 1           | 0.861283419 | 0.62200122  | 0.773972563 |             |
|         | 1.043146789                                                                                                                                                                                | 0.901105311 | 1           | 0.933444022 | 1.020821825 |             | 0.96133058  |
|         | 1.249920959                                                                                                                                                                                | 1           | 0.874993026 | 0.816294263 | 1.005669097 | 0.909747795 |             |
|         | 0.536090893                                                                                                                                                                                | 0.850230918 |             |             |             |             |             |
| YLR149C | YLR149C::YLR149C::molecular_function unknown                                                                                                                                               |             |             |             |             | 1           | 0.896223852 |
|         | 1.233586515                                                                                                                                                                                | 1.426517743 | 1.015549251 | 1           | 1.390585773 | 2.049704707 |             |
|         | 0.999352485                                                                                                                                                                                | 0.886234196 | 1           | 1.603083811 | 2.475761011 | 2.098967608 |             |
|         | 1.278159474                                                                                                                                                                                | 1           | 4.365632329 | 2.586021905 | 3.479606348 | 1.518677929 | 1           |
|         | 3.036736176                                                                                                                                                                                | 2.425203733 | 2.572044677 | 2.140776117 | 1           | 1.14335668  |             |



1.699963577 1.348146526 1.403706934 1 1.011587344 0.816423319  
2.190691395 1.52624645 0.832093215 1 1.006098845 0.845188573  
1.081751363 0.701618558 1.450291401 0.666349844  
YBR106W YBR106W::PHO88::May be a membrane protein involved in inorganic  
phosphate transport and regulation of Pho81p function 1 1.475000687  
1.277150514 1.209437428 1.804335862 1 1.276790606 1.009588371  
1.55979986 1.533615704 1 1.008298574 1.192937931 1.213712854  
1.166526281 0.632886887 0.51055789 0.359352595 0.819678226 1  
1.011838815 0.865214896 1 1.062570163 0.778060511  
1.23572389 1.101153022 0.881341124 1.588218866 1.553755047  
1.134314693 1.4355045 1 1.541813461 1.636199705 1.328366197  
1.357911551 1.212425675 1.443028354  
YLR151C YLR151C::PCD1::peroxisomal nudix hydrolase active towards coenzyme A  
and its derivatives 1 1.202777734 1.43052792 1.354397938 1  
1 1.18295098 1.253648237 1.565981176 1.357268056 1  
1.054797708 0.666642886 0.97831963 1 1.266936794 1.053808825  
0.74917984 0.655408484 1.039688786 1.199282478  
0.960699439 1 1.053215558 1.06721622 1.134201866 1.305491997  
1.239249807 1 1.096068859 1.261017729 2.141104919  
1.287167305  
YBR108W YBR108W::YBR108W::molecular\_function unknown 1 1.149272793  
1.141648044 1.119520023 1.408151732 1 1.069244319 1.062476068  
1.446452388 1.257670373 1 1.070802128 1.124125735 1.538471851  
1.32946996 1 1.120846956 0.868736747 1.073792412 1.151443284 1  
1.064046504 1.287090238 1.173037306 1.093002362 1 1.015488395  
0.98946344 1.138062905 0.83052254 1.081948881 1 1.293458485  
0.904786059 0.815805882 0.962816914 0.477090123 1 1.252281773  
1.107807803 1.049366618 0.757877035 0.966577823 0.936917726  
YKR050W YKR050W::TRK2::membrane protein; low affinity potassium transport 1  
1.771692119 1.754791141 1.487832315 1 1.360251603  
1.885715791 1 1.651538296 1.478791007 1.86113942 1.336462239  
0.827371707  
1.002027182 0.665449914 0.915355374 1.02675876 0.976966338 1  
1.05708986 0.765380312 1.473835897 1 0.964082029  
0.92452554 0.977803263 1.309567846 1.423549138 3.629461463  
YBR110W "YBR110W::ALG1::beta-1,4-mannosyltransferase" 1 0.975372253  
0.950760484 1.017642402 1.019395168 1 0.956623982 1.085658725  
1.00378165 0.947484031 1 1.165920466 1.257354268 0.909051163  
0.988554691 1 1.727948637 1.421887135 1.100924862 1.579393199 1  
1.460517759 1.436095122 1.233632093 0.908760777 1 1.276575946  
1.53526311 1.420906617 1.006291302 1.0744974 1 1.565209335  
1.884603505 1.617651048 1.354703828 0.925055561 1 1.655232798  
1.833499252 1.283276197 1.068272062 1.10703594 0.844101524  
YKR052C "YKR052C::MRS4::mitochondrial carrier protein, highly homologous to  
Mrs3p" 1 1.318694972 1.082877209 1.104790124 1.087660095 1  
1.066425515 1.083691651 1.193584307 1.206509537 1 5.744113234  
2.371476157 1.131214952 1.154875014 1 4.996808324 2.459512272  
2.002639331 1.65545983 1 7.036692034 3.233605097 1.651632346 1  
3.72848143 3.672709842 4.375315675 0.895118744 1.259086071 1  
5.674342338 3.577003996 5.940155673 2.13101957 0.870372436  
2.869097008 0.59641928 0.380748021 0.395280139 1.159326177  
YBR124W YBR124W::YBR124W::molecular\_function unknown  
0.866563123 0.742058518 0.98795403 0.843557383 0.780586374  
0.923386968 1.076887923  
0.952952911 0.959809688 1.028697845 0.956872  
1 0.908649284 0.877142025 1.062895892 1 0.962345992  
1.164413605 0.721014342 1.44734634 1.000838238

YBR126C "YBR126C::TPS1::Probable regulator of glucose influx into the cell & into glycolytic pathway, indirectly regulating glucose-induced signalling (activation & inactivation) & initial step(s) of glucose metabolism. Homologue of E. coli otsA protein" 1 1.914467582 2.135546518 2.096781748  
1.530923958 1 2.140192433 2.106475555 1.784074769 1.848774334 1  
1.998829454 3.319990764 3.516078196 2.114385095 1  
1.389283386 1 1.33260691  
1.788175262 1.987745864 1.084394223 1.282131566 1 1.033518551  
1.27627052 1.420287946 0.906503204 0.62057719 1 1.750570098  
1.758675311 1.314930516 1.022615635 1.929117256 0.95705708

YBR128C YBR128C::APG14::Required for autophagy 1 1.338409124  
1.056352491 1.076169079 0.821269878 1 1.168894229 1.081222813  
0.879201493 0.869076359 1 1.288845379 0.704390506 0.963694999 1  
0.955985594 0.70669271 0.618027837 0.807222461 1.038436987  
0.837546045 0.787502271 0.69033008 1 0.960060641 0.725718379  
0.777327176 1.174488129 1.081675359 1 0.983587867 0.613061251  
0.587214907 0.713991384 0.63952978 1 0.935750436 0.722404676  
0.752156337 0.694296815 1.18306502 0.815205939

YAL054C YAL054C::ACS1::one of 2 acetyl-coA synthetases in yeast 1  
1.421475401 1.424011823 1.185155279 1.38678858 1 1.210450497  
1.307372758 1.34175667 1.327477132 1 1.39185765 1.25291042  
1.81939841 1.109173068 1 0.728440421 0.711697624  
0.484293482 0.843137135 0.625102037 1 0.890660732 0.98137412  
0.946171992 0.855973886 1 0.827082383 1.041358472  
1.777066397 1 0.835858903 0.785126313 1.011638868 0.689489224  
1.649540175 0.959683866

YBR130C YBR130C::SHE3::cytoplasmic protein involved in mother-specific HO expression 1 0.951785667 0.95764673 1.201571691 0.918065038 1  
1.139033213 1.226405627 0.963340026 0.940443953 1 0.934362527  
1.102830853 0.839114136 1.088207969 1 1.437391768  
0.873807728 1 0.981199265 1.068599201 0.782066738 1  
1.00689287 0.928793757 1.278759904 0.914587587 1.057776338 1  
1.148809571 0.784702097 0.862724313 1.04016799 0.772902101 1  
1.419693346 1.082532039 1.546620298 0.920864588 1.629856756 0.963186421

YAL056W YAL056W::GPB2::Gpa2 interacting partner; Homolog of GPB1<br> Gpb2 binds in the two hybrid system with Gpa2 and plays an inhibitory signaling role attributable to interactions with Gpa2 and an unknown target in the PKA pathway.  
1 1.262220521 0.923411484 1.436264181 0.907512969 1 1.324434248  
1.34027138 0.99815467 0.892880516 1 1.348771873 1.064011734  
0.739312703 1.131654192 1.464308003 1  
0.750890505 1 1.047871628 1.138277188 0.768402413  
1.204410292 1.165451576 1 0.986581363 0.784206601 0.99898911  
0.834913752 0.77597616 1 0.960404065 0.824136049 0.911266398  
0.888965366 1.088763962 0.885255897

YPR104C YPR104C::FHL1::Putative transcriptional regulator of rRNA-processing genes 1 0.758841535 0.789250119 0.95092309 1.031117838 1 0.742378543  
0.740582808 0.871576801 0.830560465 1 0.74963931 0.631991294  
0.614034589 1.210534045 1 0.63596115 0.575033913 0.729233616 1  
0.750543931 1.109839003 0.719422044 0.989839845 1 0.933797027  
0.827042684 0.821426416 0.783252124 1.059886529 1 1.046945204  
1.050390806 0.926769287 1.097395255 1.055712605 1 0.855981357  
1.088135168 0.513279079 0.891939719 1.03936572

YPR106W YPR106W::ISR1::Inhibition of staurosporine resistance 1  
1.115118149 0.886619251 0.810682428 0.634459324 1 0.985127806  
0.928619361 0.87864948 0.707675722 1 1.151367618 1.003918594  
1.062223611 0.780196275 1 0.902645925 0.818729009 0.726384479  
0.764920253 1 0.735115107 0.732637654 0.611274074 0.725731575 1

|         |                                                                                                       |             |             |             |             |             |
|---------|-------------------------------------------------------------------------------------------------------|-------------|-------------|-------------|-------------|-------------|
|         | 1.02329205                                                                                            | 0.90169069  | 0.91366091  | 0.999022204 | 1           | 0.878197119 |
|         | 0.8725168                                                                                             | 1.146720287 | 0.639080407 | 0.910923347 | 1           | 0.818126256 |
|         | 0.856400215                                                                                           | 0.974682885 | 0.565796095 | 0.813900769 | 0.956181415 |             |
| YAL001C | YAL001C::TFC3::transcription factor tau (TFIIIC) subunit 138                                          |             |             |             |             | 1           |
|         | 1.100601473                                                                                           | 1.159851272 | 1.329307917 | 1.274630721 | 1           | 1.31621906  |
|         | 1.290449028                                                                                           | 1.08703862  | 1           | 1.421051963 | 1.330090681 | 1.048994941 |
|         | 1.288349261                                                                                           | 1           | 0.987956402 | 0.93028087  | 0.908369159 | 1.010362285 |
|         | 0.992232175                                                                                           | 1.469952691 | 1.382327355 | 1.083479098 | 1           | 1.147866576 |
|         | 1.206105543                                                                                           | 1.278840073 | 1.073192679 | 1.354410357 | 1           | 1.098909524 |
|         | 0.924704471                                                                                           | 1.429038683 | 1.076297728 | 0.889708573 | 1           | 0.96338698  |
|         | 1.028908443                                                                                           | 0.984500575 | 0.783601842 | 1.135602752 | 0.837972183 |             |
| YNL292W | YNL292W::PUS4::catalyzes formation of Psi55 (modified uridine) in mitochondrial and cytoplasmic tRNAs |             |             |             |             | 1           |
|         | 1.15746512                                                                                            | 1           | 0.831698372 | 0.713066042 | 1.170314031 | 1           |
|         | 0.706470864                                                                                           | 0.58985447  | 0.690264383 | 1.016151356 | 1           | 0.411421465 |
|         | 0.407830607                                                                                           | 0.729428792 | 1           | 0.511512332 | 0.649412906 | 0.728103994 |
|         | 0.812415815                                                                                           | 0.779724323 | 0.668724274 | 0.800495949 | 0.830481906 | 1           |
|         | 0.744067212                                                                                           | 0.873465817 | 0.83148037  | 0.775428869 | 1.194648984 | 1           |
|         | 1.002605148                                                                                           | 0.859500403 | 0.847812056 | 1.13053328  | 0.878422799 | 1.143564939 |
| YNL306W | YNL306W::MRPS18                                                                                       |             |             |             |             | 1           |
|         | 1.344617943                                                                                           | 1           | 0.936346191 | 1.176558904 | 1.410283146 | 1.390347029 |
|         | 1.03069663                                                                                            | 1.06832524  | 1.751904274 | 1.096334937 | 1           | 0.97504471  |
|         | 0.585257982                                                                                           | 0.711773038 | 0.825244222 | 1.544849635 | 1.16518426  |             |
|         | 0.969233614                                                                                           | 1.070827006 | 1           | 0.922215862 | 1.288474634 | 1.187694177 |
|         | 1.02657644                                                                                            | 1.17439633  | 1           | 0.991624647 | 1.119124582 | 1.231176538 |
|         | 0.971216535                                                                                           | 0.768595143 | 1           | 1.16202678  | 0.97476512  | 0.870237399 |
|         | 0.779929545                                                                                           | 1.292636749 | 1.247764158 |             |             |             |
| YNL308C | YNL308C::KRI1::KRRI-Interacting protein 1                                                             |             |             |             |             | 1           |
|         | 1.011532804                                                                                           | 0.923930591 | 1.196341779 | 1           | 0.817683046 | 0.851273077 |
|         | 1.034584156                                                                                           | 1.105335993 | 1           | 0.772246114 | 0.561855743 | 0.540460682 |
|         | 1.13100654                                                                                            | 1           | 0.282352838 | 0.233127228 | 0.587809123 | 1           |
|         | 0.681932156                                                                                           | 0.42643685  | 0.647125131 | 1           | 0.687342577 | 0.590174782 |
|         | 0.513750718                                                                                           | 0.513298899 | 0.810948923 | 1           | 1.001326825 | 0.903823436 |
|         | 0.734014973                                                                                           | 1.671487167 | 1.751874364 | 1           | 0.764245258 | 0.699029361 |
|         | 1.094527369                                                                                           | 1.186718251 | 0.728642431 |             |             |             |
| YKR054C | YKR054C::DYN1::Dynein                                                                                 |             |             |             |             | 0.956710011 |
|         |                                                                                                       |             |             |             | 0.995326947 | 1.084601652 |
|         |                                                                                                       |             |             |             | 0.921102846 |             |
|         |                                                                                                       |             |             |             | 1           | 1.163924008 |
|         | 1.119948161                                                                                           | 1.359910493 | 1.222327554 | 1.07190032  | 1           | 1.294925473 |
|         | 1.030624889                                                                                           | 1.210862804 | 1           | 1.013013692 | 1.074200269 |             |
|         | 1.03401696                                                                                            | 1.017335295 | 1.058629408 |             |             |             |
| YNL310C | YNL310C::YNL310C::molecular_function unknown                                                          |             |             |             |             | 1           |
|         | 1.2014681                                                                                             | 1.002213181 | 1.346028598 | 1           | 0.919188698 | 0.945453115 |
|         | 1.635055512                                                                                           | 1.346514705 | 1           | 1.085220301 | 1.038020409 | 1.550338142 |
|         | 1.389557557                                                                                           | 0.846951584 | 0.665985833 | 0.876065496 | 1           |             |
|         | 2.051801996                                                                                           | 2.822105142 | 1.960322806 | 1.354529642 | 1           | 1.108365757 |
|         | 1.171696754                                                                                           | 0.867172862 | 0.751590531 | 0.815432341 | 1           | 1.15771222  |
|         | 1.908335795                                                                                           | 1.451497777 | 1.210892214 | 1.822118528 | 1           | 1.213107935 |
|         | 1.301969138                                                                                           | 1.052166999 | 1.162865033 | 1.30315469  | 0.991206341 |             |
| YKR056W | YKR056W::TRM2::tRNA methyltransferase                                                                 |             |             |             |             | 1           |
|         | 0.657221186                                                                                           | 0.910321497 | 1.155551986 | 1           | 0.792779629 | 0.707896601 |
|         | 0.890699137                                                                                           | 1.055880489 | 1           | 0.401411587 | 0.34964828  | 0.242705931 |
|         | 1.01743427                                                                                            | 1           | 0.204892666 | 0.177796917 | 0.165713685 | 0.412218491 |
|         | 0.350203784                                                                                           | 0.27579686  | 0.311550304 | 0.865928264 | 1           | 0.864257198 |
|         | 0.577851148                                                                                           | 0.774505914 | 0.989360916 | 0.988563332 | 1           | 0.719411699 |
|         | 0.551359068                                                                                           | 0.482994009 | 0.711832127 | 0.800716609 | 1           | 0.498077956 |
|         | 0.658374578                                                                                           | 0.847149231 | 1.171827997 | 0.413772852 | 0.593673049 |             |

YNL312W YNL312W::RFA2::Involved in nucleotide excision repair 1  
 1.176362848 1.056620341 1.015994645 1.258019652 1 1.065286324  
 1.088886511 1.380234242 1.277328398 1 1.024671568 1.021946623  
 1.2088926 1.275648582 1 1.117760798 0.872171936 0.753021967  
 1.21943417 1 1.190052057 0.642770168 0.654431286 1.317390932 1  
 1.016345545 1.343078503 1.487267398 0.923739725 0.952279104 1  
 1.175314635 1.86378425 1.627439182 1.30249524 1.125049 1  
 1.502584664 1.743439095 1.21293767 1.17471874 1.186767083 1.357217158  
 YNL314W YNL314W::DAL82::Positive regulator of allophanate inducible genes 1  
 1.221938675 1.221122207 1.119904122 1.4265435 1 1.079479989  
 1.137498406 1.73472335 1.505390895 1 1.152281368 1.142468747  
 1.436612844 1.327878914 1 1.06829383 0.847647281 0.962531197  
 1.006670708 1 1.121075144 1.708879101 0.962686881 1  
 1.096013332 1.001504852 0.861701941 0.911426159 0.931079319 1  
 0.919000931 0.843336333 0.834605221 0.991500805 1.379849474 1  
 0.97139612 0.969950362 0.694564099 0.986791411 1.089276219  
 YKR058W YKR058W::GLG1::self-glucosylating initiator of glycogen synthesis;  
 similar to mammalian glycogenin 1 0.90522205 1.267438089 0.94409264  
 1.156583814 1 1.088340941 1.472799383 0.8273783 1  
 1.592095163 1.500901213 1.724473814 0.938695948 1 2.559371433  
 1.801303529 1.474699641 1 2.090343033 2.652340383  
 1.304674636 1.181205097 1.283959377 1.108327625 0.871629934  
 0.987491852 1 1.444137508 1.360036295 1.752708295 1.915594174  
 2.308672422 1 1.306371629 1.196510068 1.054982776 1.418663236  
 2.478268636 0.887007122  
 YNL316C YNL316C::PHA2::prephenate dehydratase 1 1.454666487  
 1.350332042 1.282430097 1.391545941 1 1.322908276 1.350168155  
 1.51010997 1 1.024081617 1.229844837 1.352014777 1.305744134 1  
 1.015207251 0.386503429 0.532272256 0.504001482  
 0.220688196 1 1.0704448 0.89504649 0.897281491 1.048906327 1  
 1.104531463 1.097865865 0.769706081 0.881587438 1.084320848 1  
 1.03678697 0.95825509 1.221495463  
 YKR060W YKR060W::YKR060W::molecular\_function unknown 1 0.631319023  
 0.770904289 0.795611247 1.085846152 1 0.703613103 0.614452535  
 0.988642289 0.977364671 1 0.458043686 0.473363104 0.513565717  
 0.976335854 1 0.452213862 0.561659163 0.617460993 1.099184461 1  
 0.678895677 0.8134901 0.803403971 0.716665266 0.839968098  
 0.769455259 0.657722249 0.976341855 1.042033595 1 0.920732249  
 1.263963597 1.0988389 1.48228878 1 0.630379529 0.857624209  
 0.498410547 1.781894915  
 YNL330C YNL330C::RPD3::Transcription modifier; required for vegetative  
 repression of early meiosis-specific as well as non-meiotic genes; required for  
 mitotic intragenic and intergenic recombination and for sporulation 1  
 1.045307501 0.999946529 0.949255861 1.082592303 1 0.968320897  
 1.023961274 1.188669831 1.023280419 1 0.99812081 1.01470959  
 0.936945739 0.979461484 1 1.579770607 1.037150978 1.118833453  
 1.12315131 1 1.551710431 1.14146847 1.105414973 1  
 1.126981639 1.222459999 1.168202238 1.057028624 0.930856604 1  
 1.07172223 0.969846785 0.960802885 0.831295538 0.99417409 1  
 1.106234856 1.159852881 0.990599022 0.944265373 0.916742263 0.999962573  
 YBR132C "YBR132C::AGP2::The acronym may be misleading. AGP2 has been shown  
 to be a carnitine permease, not a general amino acid permease with broad  
 substrate specificity." 1.167260093 1.038602017 1.263504975 0.861492715  
 1.070283556 1.159891386 0.942060813 1.024674529 1.347896613  
 1.265029511 1.026000973 0.92220761 1 1.179841041 1.068882499  
 1.25974801 1 1.083211827 1 1.147649971  
 1.374606216 1.49806125 1.560203667 0.827539569 1 1.400941393

0.805029126 1.781054441 1.911863832 0.464463013 1 1.447286132  
 0.905307222 1.5320421 0.650379965 2.009500828 0.380020803  
 YKR074W YKR074W::YKR074W::molecular\_function unknown 1 0.984819786  
 1.440990797 0.930604056 1.701351621 1 0.927386642 1.217840449  
 1.732620644 1.487388501 1 1.127567945 1.298085126 1.770402287  
 1.191799035 1 1.122830169 0.804226592 0.979912999 0.962174043 1  
 2.839560079 3.677324384 1.726871124 1 0.966713477 1.155079649  
 0.981986735 0.819315544 1.17675563 1 1.38477202 2.301167825  
 1.595377888 2.177602511 2.200027678 1 1.107324852 1.282028907  
 1.160755108 1.847614086 1.375187825 1.510451421  
 YNL332W "YNL332W::THI12::thiamine regulated gene, homologous to nmt1a in  
 Schizosaccharomyces pombe; putatively involved in pyrimidine biosynthesis" 1  
 1.670293889 1.575986776 1 1.458728841 1.557818038  
 2.215771276 1 1.171854322 1.490814262 2.76638758 2.23642752 1  
 1.670396071 2.175353816 1 1.112571552 1.947073134  
 1.38244308 1.177029751 0.85029971 0.843961132 1  
 0.985890402 6.118745492 1 1.688482227  
 1.882019325  
 YBR134W YBR134W::YBR134W::molecular\_function unknown 1  
 1 1.421178788 1 1.505686513  
 1  
 0.840275747 0.667338761 0.935506969 1.13405862 1.039209553 1  
 0.587599035 0.573052809 0.604749573 1 1.089496236  
 1.230632497 1.157400414 1.046650968 0.863365265  
 YKR076W YKR076W::ECM4::ExtraCellular Mutant 1 0.748593928 1.13620503  
 1.546996222 1.528036957 1 1.045159818 1.367686838 1.704063125  
 1.808400623 1 3.056500462 4.530327167 4.868479575 2.344563978 1  
 10.14436059 16.28148546 15.3798443 9.228913748 1 5.044407794  
 5.538227787 8.661155132 3.660512785 1 2.188036951 5.627845569  
 10.80499192 1.782344964 1.40797868 1 3.638410101 14.13990101  
 20.71823055 16.40146113 2.101470942 1 3.910136279 8.091113825  
 7.540751606 1.560162601 2.38568867 0.90539525  
 YNL334C "YNL334C::SNO2::SNZ2 proximal ORF, stationary phase induced gene" 1  
 0.824251356 0.847920453 1.043843554 1.005306597 1 0.876651009  
 0.800306644 0.950326675 0.993061459 1 1.413757851 3.93286211  
 12.00004449 6.254873404 1 0.761109544 0.996786478 1.59689498 1  
 1.326575873 1.054865017 0.918593106 1.480804697 1 0.992712535  
 1.231542731 1.280322564 1.136733937 1  
 1 1.256421832 1.789775378  
 YBR148W YBR148W::YSW1::Spore-specific protein 1 1.274282398  
 1.186062787 1.431803172 1.240727535 1 1.442228439 1.371873579  
 1.301640686 1.436882683 1 1.439324836 1.562795623 1.327545875  
 1.594335366 1 1.600230529 1.72194495 2.279387957 2.18306853 1  
 0.793338091 1.264773771 1.058578134 1.289558423 1 0.795149204  
 0.841900874 1.135737125 0.933742009 1 0.775676836  
 1.138647962 0.95885364 1 0.804563885 0.653567145 0.848305675  
 0.97032936 0.660565062 1.031485049  
 YKR078W YKR078W::YKR078W::molecular\_function unknown 1 1.011514556  
 1.167769736 0.993259138 1.28149509 1 1.05989298 0.976989789  
 1.392825191 1.134034596 1 0.883058802 0.978005537 0.879190785  
 1.033706992 1 0.791386302 0.525547042 0.695013743 1  
 1.323694303 0.795625268 0.805454949 0.787863262 0.892117874  
 0.863873479 1.15494452 1 1.027402293 0.962675119 0.656579537  
 1.007878914 1 1.081086291 1.005177028 1.133232242 1.352096836  
 0.962814121 1.546352012  
 YBR150C YBR150C::TBS1::Probable Zn-finger protein

|             |                                                                                                                                                                  |             |             |             |             |
|-------------|------------------------------------------------------------------------------------------------------------------------------------------------------------------|-------------|-------------|-------------|-------------|
|             |                                                                                                                                                                  |             | 0.82296047  | 1           | 1.083790329 |
| 1.049867265 | 1.077450017                                                                                                                                                      | 0.989521198 | 1.062223297 | 1           | 1.171010982 |
| 1.07352508  | 1.026487148                                                                                                                                                      | 0.851923199 | 0.795007987 | 1           | 1.569997387 |
| 1.247698958 | 1.186201498                                                                                                                                                      | 1.091068748 | 1.301657609 | 0.901892695 |             |
| YKR080W     | "YKR080W::MTD1::NAD-dependent 5,10-methylenetetrahydrofolate dehydrogenase"                                                                                      |             |             |             |             |
|             | 0.836043898                                                                                                                                                      | 0.837031246 | 0.793883636 | 1.040644012 |             |
| 0.849931083 | 0.743604599                                                                                                                                                      | 1.073233803 | 0.9292695   | 0.969328152 |             |
| 1.244932957 | 0.805141986                                                                                                                                                      | 0.779275248 | 1           | 4.30048366  | 2.535198493 |
| 1.473959589 | 1.021954754                                                                                                                                                      | 1           | 3.390659267 | 1.725208745 | 1.224872694 |
| 1.472487219 | 1                                                                                                                                                                | 1.080589031 | 1.22996431  | 0.87247415  | 1.299377263 |
| 1.727412183 | 1                                                                                                                                                                | 0.74944777  | 1.103744615 | 0.52663917  | 1.04104965  |
| 7.716663585 | 1                                                                                                                                                                | 0.750633718 | 0.831873941 | 0.910076609 | 2.412113585 |
| 5.348938674 | 1.67156625                                                                                                                                                       |             |             |             |             |
| YBR152W     | YBR152W::SPP381::Suppressor of Pre-mRNA Processing mutant                                                                                                        |             |             |             |             |
| 0.715377711 | 0.933651886                                                                                                                                                      | 1.245248524 | 0.895938732 | 0.938018198 |             |
| 0.897011442 | 0.963962224                                                                                                                                                      | 0.896990229 | 1.351762323 | 1.48758452  |             |
| 0.883048088 | 1                                                                                                                                                                | 2.117681733 | 1.326343509 | 1.668934821 |             |
|             | 1                                                                                                                                                                | 0.707113397 | 0.913693626 | 0.812746145 | 0.766672649 |
| 0.931883559 | 1                                                                                                                                                                | 1.030202951 | 0.998351341 | 1.237194632 | 1.247508943 |
| 0.882346225 | 0.839486159                                                                                                                                                      | 0.679885208 | 1.271949141 |             |             |
| YKR082W     | "YKR082W::NUP133::Nuclear pore complex protein involved in poly(A)+ RNA transport, nuclear pore distribution, and possibly in the biogenesis of functional tRNA" |             |             |             |             |
| 1           | 1.204561927                                                                                                                                                      | 1.224394608 | 1.576934551 | 1.073840131 | 1           |
| 1.354409063 | 1.519179595                                                                                                                                                      | 0.991991446 | 1.000447877 | 1           | 0.886893789 |
| 0.889731837 | 0.611657745                                                                                                                                                      | 1.310367405 | 1.476115544 |             |             |
| 1.060355567 |                                                                                                                                                                  |             | 1           | 0.865054234 | 0.702135891 |
| 0.887036239 | 1.065942288                                                                                                                                                      | 1.122007235 | 1           | 1.078071873 | 0.619010668 |
| 0.715762824 | 0.871459295                                                                                                                                                      | 0.723844308 | 1           | 0.796087657 | 0.592731491 |
| 0.867375703 | 0.789756544                                                                                                                                                      | 0.79972699  | 0.517493802 |             |             |
| YBR154C     | "YBR154C::RPB5::25-kDa RNA polymerase subunit (common to polymerases I, II and III)"                                                                             |             |             |             |             |
| 1           | 1.319334712                                                                                                                                                      | 1.41247329  | 1.37166799  | 1.85303948  | 1           |
| 1.293656261 | 1.157062084                                                                                                                                                      | 1.607427099 | 1.706682291 | 1           | 0.853962308 |
| 0.881496665 | 1.037276669                                                                                                                                                      | 1.314563536 | 1           | 0.538087682 | 0.33431263  |
| 0.393056314 | 0.895225715                                                                                                                                                      | 1           | 0.710615595 | 0.592583731 | 0.760934926 |
| 1.110613354 | 1                                                                                                                                                                | 0.816396227 | 0.76985714  | 0.659086732 | 0.68338752  |
| 0.959765563 | 1                                                                                                                                                                | 0.836470406 | 0.964109355 | 0.97465662  | 0.930100117 |
| 1.617329269 | 1                                                                                                                                                                | 0.851368469 | 0.882578358 | 0.916518023 | 1.567181231 |
| 0.970741024 | 1.365097829                                                                                                                                                      |             |             |             |             |
| YKR084C     | YKR084C::HBS1::Protein related to translation elongation factor EF-1alpha and to Suf12p/Sup2p/Gst1p/Sup35p                                                       |             |             |             |             |
| 1           | 0.668134514                                                                                                                                                      | 0.73822636  |             |             |             |
| 0.815720473 | 0.672695945                                                                                                                                                      | 1           | 0.847931353 | 0.9043266   | 0.758560289 |
| 0.680081704 | 1                                                                                                                                                                | 0.677667823 | 0.795152302 | 0.565087944 | 0.880168186 |
| 1.143017395 | 0.703952343                                                                                                                                                      | 0.872786227 | 0.8513227   | 1           | 1.059605575 |
| 0.817504853 | 0.806824212                                                                                                                                                      | 0.848767646 | 1           | 0.984535546 | 1.156647147 |
| 1.277777756 | 1.141570665                                                                                                                                                      | 1.126637483 | 1           | 0.951445274 | 0.953984288 |
| 1.172832351 | 1.155943413                                                                                                                                                      | 0.659109145 | 1           | 0.57007019  | 0.586935529 |
| 0.643187826 | 0.502521384                                                                                                                                                      | 0.637279526 |             |             |             |
| YBR156C     | YBR156C::SLI15::Mitotic spindle protein involved in chromosome segregation.                                                                                      |             |             |             |             |
| 1           | 1.257976989                                                                                                                                                      | 1.17180141  | 1.236218586 | 1           |             |
| 1.241677758 | 1.170533066                                                                                                                                                      | 1.116477709 | 1.358434408 | 1           | 1.149658018 |
| 1.112217452 | 1.155685847                                                                                                                                                      | 1.096444252 | 1           | 0.788402237 | 0.443162359 |
| 0.318694003 | 0.647120961                                                                                                                                                      | 1           | 0.993427924 | 0.533119628 | 0.388913669 |
| 0.699545473 | 1                                                                                                                                                                | 1.403832413 | 0.85656756  | 1.429656147 | 1.413436189 |
| 1.254456298 | 1                                                                                                                                                                | 0.998425185 | 0.679957791 | 0.948631551 | 0.587549157 |
| 0.561182089 | 1                                                                                                                                                                | 1.144656997 | 0.891978365 | 0.942790621 | 0.907182857 |
| 0.846651413 | 0.944798293                                                                                                                                                      |             |             |             |             |

YBR158W YBR158W::CST13::Chromosome STability 1 1.036646539  
0.834527786 1.192129807 0.738951086 1 1.139330806 1.075394118  
1.038595609 0.902998838 1 0.972803684 0.822746248 0.643415244  
0.974180889 1 0.850781199 0.663816504 0.505010158 0.876931749 1  
0.696319631 0.335907397 0.429760303 0.80484354 1 1.065145138  
0.941881097 1.05642007 0.99131793 1.142972459 1 0.760803678  
0.676965684 0.969972206 0.329796909 0.733043186 1 0.877049221  
0.735370511 0.930624544 0.996986097 0.89551709 0.823962171  
YBR171W "YBR171W::SEC66::glycoprotein complexed with Sec62p and Sec63p in  
the Sec63 complex, an integral endoplasmic reticulum membrane protein complex  
required for translocation of presecretory proteins" 1 1.486274585  
1.652029738 1.305169891 2.462383138 1 1.225918506 1.203020366  
1.978916619 1.700599275 1 1.080398975 1.169823201 1.688023522  
1.301700493 1 0.81121771 0.303589785 0.432815183 0.843969842 1  
1.415141118 1.401663438 1.3155676 1.26762703 1 1.067102867  
1.151677492 0.727302363 0.806958709 1.024720209 1 1.065911177  
1.383179887 1.451627183 1.076222752 1.625040056 1 0.952712658  
1.30717899 0.891634474 1.719478435 0.92534341 1.338829134  
YAL003W "YAL003W::EFB1::Translation elongation factor EF-1beta, GDP/GTP  
exchange factor for Tef1p/Tef2p" 1 1.051904037 1.063318131 0.777705521  
1.062750249 1 1.004041385 0.826516467 0.848388646 0.812597787 1  
0.543083878 0.613366963 0.552605771 0.710485873 1 0.413525473  
0.25068601 0.283833099 0.584736794 1 1.257430359 0.836244027  
0.823856674 1.194761031 1 1.248941669 1.019310603 1.149808164  
1.177985935 1.092319987 1 1.0871622 1.063876961 0.89979927  
0.54475293 1.012251272 1 0.839853719 0.859571058 0.659896796  
0.897245115 0.823726225 1.093654335  
YBR173C YBR173C::UMP1::Involved in ubiquitin-mediated proteolysis 1  
1.120395996 1.838452175 1.296358011 1.869308485 1 1.225043582  
1.124875489 1.641097027 1 1.285541027 1.718674809 2.604937903  
1.480687645 1 0.937313794 1.068135144 1.028870478 1.437841711 1  
1.361025076 1.519002073 2.263441021 1.330542482 1 1.453133086  
1.984994268 1.434754521 1.007222193 1.160507886 1 1.292722787  
2.313773884 2.42230563 1.242332376 1.526880036 1 1.19064503  
1.679329838 1.28644801 1.174898305 1.279073017 1.254769164  
YAL005C YAL005C::SSA1::Stress-seventy subfamily A 1 1.092535197  
0.820253123 1.412901233 0.634783088 1 1.513578737 1.627633253  
0.687790823 0.738869418 1 1.041619384 1.10096153 1.020090543  
0.567975441 1 2.530800876 3.099740488 4.460947451 2.329329072 1  
0.669699732 0.445954943 0.719402098 1.302047445 1 1.340082732  
1.089859983 1.632360006 1.030457419 0.890645125 1 1.550157696  
0.885194029 0.731282758 0.221516513 0.218572201 1 1.243471642  
0.899760252 0.627725547 0.390921979 0.737424751 0.513991299  
YAL008W YAL008W::FUN14::Product of gene unknown 1 1.59081352  
1.493665482 1.367929863 2.334561385 1 1.321011288 1.331192291  
1.900147612 1.643311625 1 0.974772931 1.425302076 2.383961071  
1.405562566 1 0.823471814 0.88076178 1.046487637 1.669062255 1  
1.260686729 2.298089452 1.57112561 2.64397276 1.2359856  
1.496572069 1.082059126 1.003489393 1.241063032 1 0.960968162  
1.396529671 2.043483234 1.171371003 1.800144325 1 1.414477918  
1.702273037 1.192839841 2.028078939 1.773736007 1.889596585  
YAL010C YAL010C::MDM10::Mitochondrial outer membrane protein involved in  
mitochondrial morphology and inheritance 1 0.909710553 0.923558925  
1.0659943 0.862674841 1 1.092526929 1.030245552 0.968736413  
0.917812248 1 1.080969362 1.042980178 0.919579486 1.116979525 1  
1.226407948 1.225337311 1.258508063 1.070706193 1 0.761592198  
0.876074557 0.742375705 0.829194199 1 0.899818752 1.006044311

1.055798033 1.091080504 1 1.014821328 0.808302727 0.988171475  
1.14194667 0.599344885 1 0.804131847 0.760581196 1.204985128  
0.795885476 1.040375477 0.969315762  
YAL012W YAL012W::CYS3::catalyzes one of the two reactions involved in the  
transsulfuration pathway that yields cysteine from homocysteine with the  
intermediary formation of cystathionine 1 0.96152225 0.738643774  
0.2495629 0.136364753 1 0.8699343 0.968201603 0.176723546  
0.209905777 1 1.342203971 1.266843952 0.957792977 0.171644084 1  
1.755171834 1.184790003 1.283146558 0.688887555 1 0.57961994  
0.324134368 0.248635524 0.393687798 1 1.065927856 0.992589962  
1.122693645 1.293037633 0.750411237 1 0.847247315 0.860567182  
0.620118573 0.824892048 0.614380564 1 1.052529446 0.72610702  
0.54169639 0.504076541 0.786462116 0.718011674  
YAL026C "YAL026C::DRS2::P-type ATPase, potential aminophospholipid  
translocase" 1 1.287389073 1.254693425 1.360299712 1.377520773 1  
1.38420109 1.223559244 1.102130923 1.209216235 1 1.391628545  
1.138209329 1.294605037 0.987721718 1 1.549756725 1.057920368  
0.991597264 1.120905125 1 1.675403338 1.014264109 0.964386407  
1.191434591 1 1.51454509 1.011335 1.351547037 1.176011377  
1.071796706 1 1.331176117 0.979453569 1.254240172 0.900360886  
1.085897028 1 1.444091438 1.09295751 0.681221122 1.855186781  
1.632659953 1.577874488  
YAL029C "YAL029C::MYO4::Required for mother-specific HO expression, needed  
for the accumulation in daughter nuclei of Ash1p" 1 1.174285948  
1.166917039 1.180538561 1.382190133 1 0.976803955 0.972319149  
1.415410511 1.342101898 1 1.029733143 1.012701927 1.370534435  
1.343214037 1 1.16986854 1.001235072 1.331124544 1  
0.82959557 1.190006822 0.641396392 0.705871409 1 0.936609749  
0.914055112 0.828316533 0.917861255 0.797976945 1.06489775  
0.903983012 1.107527092 1.110123486 1 1.184921481 1.294044331  
1.30029844 1.458859412 1.240225445 1.168082408  
YAL031C YAL031C::FUN21::Function unknown now 1 0.992832178  
0.961427366 1.189974026 0.829569201 1 1.134290728 1.069505301  
1.113012388 0.880383706 1 1.250082856 1.228097396 1.09602064  
1.140809755 0.826475819 0.810741315 0.915596018 0.581751488 1  
1.352231432 1.278954945 0.898633207 1 1.143458168 1.086777899  
1.096803106 1.061668536 1.031768615 1 0.84023412 0.728866001  
0.811053224 1 1.041053848 1.109470169 1.21692713 0.873287218  
1.402396555 0.80732532  
YAL033W YAL033W::POP5::Processing Of Precursors - refer to a group of  
proteins that appear to be components of both RNase P and RNase MRP 1  
1.436195585 1.622921845 1.069997497 1.590874287 1 1.124007948  
1.051084555 1.774674487 1.661514322 1 1.400531204 1.388167752  
1.691278119 1.440205567 1 0.658918504  
1 0.908403354 0.89607466 0.627213943 0.870468849  
0.862200245 1 1.038239152 1.351319814 1.024719046 1.166045379  
2.459821334 1 0.980281139 0.958592889 0.948729284 1.433280901  
1.338019508 1.154948061  
YNL336W "YNL336W::COS1::Protein with similarity to subtelomerically-encoded  
proteins such as Cos5p, Ybr302p, Cos3p, Cos1p, Cos4p, Cos8p, Cos6p, Cos9p" 1  
1.148764468 1.018966335 0.921571981 1.145534069 1 0.946856592  
0.989244567 1.110222919 1.140199269 1 1.006674579 1.044876027  
1.327307163 0.982454691 1 1.502945247 1.102007839 1.733600261  
1.387436182 1 1.569837481 1.73819395 2.100803181 1.758770851 1  
1.156586183 1.231789367 1.57211911 1.179310446 1.099526367 1  
0.893057596 1.103456131 1.107764077 0.759042709 0.744814264 1  
1.226548952 1.108223327 0.979813183 1.259852164 0.992103089 1.071763756



YNL338W YNL338W::YNL338W::molecular\_function unknown 1  
 1.221420388 1.097312787 1.144474874 1 1.225503014 1.021959605  
 1.287858629 1.109628799 1 1.341571114 1.18548653 1.873722479  
 0.514685923 0.564689329 0.677820775 0.345200031 0.743902711  
 0.512040099 1 1.101440248 0.84115708 0.885101626 0.909822973  
 1.207879904 1 0.870823029 0.76540607 0.66173357 0.830080209 1  
 1.057278061 1.223401752 1.299701062 1.092914413 1.118470507 0.818708442  
 YNR001C YNR001C::CIT1::citrate synthase. Nuclear encoded mitochondrial  
 protein. 1 0.988490855 1.143608694 1.153839115 0.773265511 1  
 1.24825806 1.540347673 1.011073979 0.883672428 1 0.824214154  
 0.980085588 1.541611785 0.778707828 1 2.507489731 2.602024276 3.373227  
 3.02661992 1 2.284122948 2.006437293 3.984804048 2.786152842 1  
 0.902917855 0.974698312 1.23017755 0.975184248 0.941525027 1  
 0.919848935 0.861653724 1.261011336 1.281580616 0.86125857 1  
 1.280121925 0.940487022 1.182054413 1.014397308 2.47898729 1.158450512  
 YKR098C YKR098C::UBP11::Ubiquitin-specific protease 1 0.856783919  
 0.978656853 1.027398499 1 1.276900368 1.165248444 1.031902685  
 0.910995307 1 1.041475985 1.141851712 1.22273932 0.945185347 1  
 1.798690994 1.846546935 1.834039997 0.633636468  
 0.419633732 1 1.107991153 1.241280565 1.040478425 0.916202957  
 0.978496434 1 1.016617133 0.917656415 0.960571599 1.045672399  
 1.320337908 1 1.34306675 0.91723849 1.20696007 1.304248355  
 0.978071994  
 YNR015W YNR015W::SMM1::Suppressor of Mitochondrial Mutation in the tRNAasp  
 gene; Dihydrouridine synthase 2 1 1.197201454 1.083014163 0.808398584  
 1.039886669 1 1.061622603 1.016053094 1.214613397 1.056575894 1  
 1.094031657 0.752944822 0.962913885 1.029018749 1 0.777037231  
 0.498500023 0.474151504 0.782871293 1 0.914970845 0.93077393  
 0.571858644 0.651335451 1 0.905434676 0.751320703 0.630672956  
 0.87413322 0.78383492 1 0.770179969 0.738768573 0.500403934  
 0.77261583 1 0.801124883 0.849015675 0.924077807 1.05107685  
 0.720325007 1.197853659  
 YNR017W YNR017W::MAS6::23 kDa mitochondrial inner membrane protein 1  
 0.947076048 0.970715385 0.669108189 0.458316549 1 0.85592056  
 1.066591786 0.865743782 0.942270175 1 0.921236192 0.769945159  
 1.244667548 0.609212183 1 0.719941879 0.617197135 0.806273698  
 1.129026005 1 0.929480039 0.890744777 0.789613786 1.173910511  
 1.067079038 0.899231775 1.278062376 1.240060888 1.16834067 1  
 0.736594196 0.658978277 0.620582778 0.662851844 0.779063815 1  
 0.89682687 0.903233963 0.626624407 0.997924496 1.132181817  
 YKR100C YKR100C::YKR100C::molecular\_function unknown 1 0.971718819  
 1.00210964 1.058701316 1.006427479 1 1.011018984 1.066223902  
 0.958311068 0.915084502 1 0.975662164 0.858993164 0.732416944  
 1.013930941 1 1.043513718 0.869910455 0.95901544 0.997539585 1  
 1.312925166 0.873073378 0.969585667 1.050393763 1 0.992632971  
 0.922420153 1.077833209 1.037419468 1.05831495 1 1.236652057  
 1.147780088 1.045549705 1.197976604 1.176660166 1 0.951132866  
 1.214051898 0.916387814 1.048296998 0.793478022  
 YNR019W YNR019W::ARE2::Acyl-CoA cholesterol acyltransferase (sterol-ester  
 synthetase) 1 0.566749799 0.711040282 0.948116933 0.462871692 1  
 0.836309152 1.214067537 0.706128307 0.641697983 1 1.201994735  
 1.55330618 1.04136475 0.592242652 1 0.726969745 0.650056704  
 0.996330334 0.469063981 1 1.510387442 1.15303262 0.802161929 1  
 1.174909123 2.277308685 1.656232102 1.288470326 1 1.153912372  
 0.796675068 0.925856816 1.54536961 0.280676523 1 0.867689002  
 0.888225905 1.115963603 0.379385573 0.646374368 0.693494204

YKR102W YKR102W::FLO10::Protein with similarity to flocculation protein  
Flo1p 1 1.475021148 0.994866656 1.011866355 1 1.349598031  
1.148362657 1 1.354345612 1.030370612 1.713215896  
0.997075118 0.473734447  
1 0.911419718 1.303069296 1.174023318 0.853954659 1  
1.097091289 1.032970395 0.974373368 1.146879963 0.874929358 1  
0.95399543 0.906299343 1.135082725 1.275403336 1.076194197 0.954430189  
YNR021W YNR021W::YNR021W::molecular\_function unknown 1 0.940238422  
0.771935724 0.810164469 0.873531161 1 0.83366165 0.779860073  
0.772284854 0.821829755 1 0.818148293 0.701569864 0.659635892  
0.776821298 1 1.222017852 0.802854128 0.849750601 0.945065105 1  
1.0239407 0.867744921 0.837649796 0.912613413 1 1.24342911  
1.155034582 1.143173889 1.22150631 0.884263464 1 0.897574153  
1.074008272 0.924097975 0.532468024 0.936150623 1 0.999029621  
1.080906072 0.932474668 1.140584949 0.943528501 1.23200292  
YKR104W YKR104W::YKR104W::not yet annotated 1 1.608359695 1.540754733  
1.566494958 1 1.321420705 1 1.066521204  
1.117727333 1.093312929 0.994137171  
0.439202151 1 0.915430814 0.690562475 1.012546726  
0.766238883 0.765787842 1 1.218467637 1.245091971 2.289561569  
1 1.117708455 1.181658353 0.861505351 1.127709273 0.96595173  
0.883504567  
YNR023W "YNR023W::SNF12::73 kDa subunit of the SWI/SNF transcription  
activation complex, homolog of Rsc6p subunit of the RSC chromatin remodeling  
complex" 1 0.667298165 0.852852818 0.972713298 0.796595491 1  
0.83768639 0.958950931 0.912597101 0.895000588 1 0.841692475  
0.806158559 0.639694197 1.015259432 1 1.004265226 0.794093119  
1.061029316 0.755893259 1 2.411932638 2.469702975 1.232442534  
1.214043664 1 0.828821755 0.998298357 1.006608027 0.848771831  
0.90904708 1 0.895254018 0.756534906 0.82263957 0.900940606  
0.801385018 1 0.880239648 0.726628142 0.961551711 0.757961569  
1.200574305 1.054251293  
YKR106W YKR106W::YKR106W::not yet annotated 1 1.689960101 1.181638996  
1.201170888 1.222399656 1 1.421509136 1.263229204 1.1822283  
1.279351277 1 1.252489067 1.120213619 1.172630296 1.156849251 1  
0.940732866 0.555748275 0.887644238 0.884158571 1 0.951994921  
0.67256333 0.889029713 0.916916822 1 1.230476075 0.947004408  
1.191174818 1.271968953 1.164332336 1 1.015685215 1.155058631  
0.932280386 0.796228501 0.904713332 1 0.842985444 1.153146548  
1.044711717 1.332762536 1.180033273 0.910648927  
YNR025C YNR025C::YNR025C::molecular\_function unknown 1 1.10975806  
1.198206867 1.155195583 1.759724023 1 0.893241683 0.952377038  
1.373921861 1.611488415 1 0.790141229 0.956001143 1.666499417  
1.062309285 1 0.728593735 0.482535955 0.691168448 0.91679802 1  
1.173489945 1.537702634 1.218673328 0.558301669 1 0.620858746  
0.653591394 0.546697283 0.599885048 0.776659181 1 1.093217533  
1.342020808 1.139476271 1.313398589 1.936162631 1 0.821572735  
1.111300866 1.23232337 1.186032286 1.226749244  
YLL002W "YLL002W::RTT109::Regulator of Ty1 Transposition; Regulation of  
mitochondrial network; Killed in Mutagen, sensitive to diepoxybutane and/or  
mitomycin C" 1 0.778888833 1.008762343 0.917351269 1.056467231 1  
1.002226158 1.036660912 1.060201878 0.929817013 1 0.709373703  
0.852191108 0.868332851 1.129505503 1 0.642652996 0.798725116  
1.033959964 1 1.407619659 1.58607376 1.272825481 1.001944228 1  
0.809639709 0.721388078 0.974447653 1.009213592 1.12051321 1  
1.173221432 1.055416023 0.754630944 1.07017114 1 0.810804574  
0.816656835 1.04868254 0.981989033 0.823088044

YNR039C YNR039C::ZRG17::zinc-regulated gene 1 0.96675206  
0.998907546 0.890330315 1 0.892144257 0.936068428 0.872064131  
0.884187936 1 1.173018796 0.855065124 0.799421748 0.942876496 1  
1.104804607 0.828679437 1.207057237 0.876259562 1 1.171427366  
0.811009962 0.919320375 1 1.011321468 0.952434152 0.764398332  
1.027455332 0.832827271 1 0.746359334 0.746734206 0.710864716  
0.738351626 0.862829827 1 0.898288549 1.015041411 1.045975535  
0.871157491 0.931288483  
YLL016w YLL016w::SDC25::molecular\_function unknown\* 1 1.560396465  
1.36475631 1.990268759 1.082224108 1 1.615811762 1.515150365  
1.522045581 1.464994326 1 1.350178283 1.514977475 1.501504998 1  
0.689704415 1.996295245 1.519709839 0.45233498 1 0.394211016  
0.378652073 0.28508453 0.978060669 0.961819006 1.047708002  
1.490205978 1.194176281 1 0.839841313 0.685342716 0.616080186  
1.105153077 1 0.776228418 0.665027092 0.829797187 0.598810742  
0.788013303 0.553394393  
YLL018c "YLL018c::DPS1::Aspartyl-tRNA synthetase, cytosolic" 1  
0.945802482 0.83364841 0.631680741 0.454187927 1 0.983365454  
1.204055279 0.497937851 0.55436427 1 0.893627095 0.943249258  
0.621541973 0.500335948 1 1.226010233 0.814089758 0.8937532  
0.693786946 1 0.967564416 0.715968643 0.583039665 0.515485613 1  
0.881417681 0.906910138 1.160255639 1.200979212 0.944524302 1  
0.881852584 0.682894905 0.616931165 0.755402344 0.572953344 1  
0.869730072 0.754696606 0.838421435 0.749100524 0.764836432 0.820459668  
YLL020C YLL020C::YLL020C::molecular\_function unknown 1 1.839478916  
1.802246641 1.321065109 2.063672292 1 1.291168185 1.214046005  
2.24722304 1.754732517 1 1.268865378 1.415744091 3.482470871  
1.392550768 1 1.488743115 1.249022257 1.838859974 1.752875394 1  
0.753135576 2.084252087 1.278467215 0.654300089 1 1.141248896  
1.390356402 1.263176297 1.142871115 0.925857406 1 0.780455483  
1.16364384 1.047674914 0.976607118 1.100116928 1 1.240142398  
1.708500623 1.260106131 1.925489924 1.842371509 1.290669756  
YLL022C YLL022C::HIF1::Hat1 Interacting Factor 1 1 0.841880229  
0.868353569 0.844158859 0.789943614 1 0.863330368 0.820034197  
1.018074412 1.13267684 1 0.672806018 0.623940257 0.603163179  
1.186990429 1 0.847333636 0.505012824 0.7348312 1  
1.151229786 0.570448655 0.791629827 1 0.953087785 0.967430744  
1.221970561 1.008858834 1.024135427 1 0.920481797 0.770853933  
0.831586091 1.174656724 0.825892964 1 0.91784684 0.809248519  
1.085848767 0.794673428 0.775843189 0.774051619  
YNR041C YNR041C::COQ2::para hydroxybenzoate: polyprenyl transferase 1  
0.997456001 0.937033042 0.920912827 0.635066694 1 0.950000821  
0.847003882 0.891127694 0.977129965 1 0.913414535 0.85012131  
0.897409429 0.625740289 1 0.934562693 0.677659767 0.965053687  
0.894617715 1 1.235699134 1.344921553 0.761748237 0.817929091 1  
0.901192066 0.877238853 0.940762841 1.151955764 0.743139518 1  
0.584329575 0.518239086 0.497083721 0.59946397 1.010998984 1  
0.739345297 0.65832893 0.966481896 0.962394963 0.902599304 0.859862762  
YNR043W YNR043W::MVD1::involved in the polyisoprene biosynthesis pathway 1  
1.044666383 0.804112331 0.861646522 0.82235376 1 0.927896873  
0.855658334 0.76832999 0.824478954 1 0.705885356 0.692706574  
0.543249966 0.545730079 1 0.738029365 0.706744602 0.653594634  
0.663753521 1 0.668226598 0.540962677 0.473676573 0.647363706 1  
0.910632028 0.757272496 0.834845621 1.208616791 0.592327604 1  
0.543196248 0.451233727 0.454804308 0.70586734 0.889675368 1  
0.86850794 0.729137371 1.154802877 1.130140557 0.899198723 0.80995221

YNR045W YNR045W::PET494::translational activator of cytochrome c oxidase 1  
0.907777322 0.855720245 0.784351746 1 0.829767273 0.940964263  
0.948067691 0.903750142 1 0.878408788 0.888867732 0.90384099  
0.9568967 1 0.995510002 0.607004812 0.980246755 1.012950207 1  
1.701173606 1.830829996 1.326724362 1.012688495 1.000885868  
0.774977649 0.919396686 0.854177938 0.753058264 1 1.347773888  
1 0.651594116 0.966045704 0.587750592 0.877380214  
1.923745951  
YNR045W YNR045W::PET494::translational activator of cytochrome c oxidase 1  
1.819608376 1.492855329 1.396220284 1.736717189 1 1.314019082  
1.238158661 1.508635246 1 1.485732553 1.433278909 1.702057117  
0.870219462 1  
0.870470446 0.978626315 1.134528967 1.008799312 0.976915919 1  
1.0205919 1.075425542 1.055188308 0.991932321 0.739212277 1  
0.807003924 0.944330148 0.850383121 0.836319936 0.679571087 1.04024128  
YNR047W YNR047W::YNR047W::molecular\_function unknown 1 1.308893397  
1.515025539 1.564435296 1.505913808 1 1.37978101 1.371943623  
1.68190478 1.582481081 1 1.894161005 1.87176777 2.276184029  
1.510535808 1 1.049860768 1.083448704 0.982607422 0.794369412 1  
0.893546251 1.287418938 0.743315061 0.929115972 1 0.871567443  
0.833560377 0.9453613 0.892141955 0.912200326 1 1.065526607  
0.990430608 1.217116546 1.41236476 1.018179733 1 0.923081403  
1.119135093 1.179641501 0.878891615 0.81850194 0.984201335  
YLL024c YLL024c::SSA2::member of 70 kDa heat shock protein family 1  
1.017294137 0.81058645 1.300596777 1 1.496644331 1.530952263  
0.707916323 0.759114437 1 1.01456427 1.034944855 0.930729387  
0.578628176 1 5.068743755 7.507858508 3.244652829 1  
0.810429325 0.54400652 0.760974601 1.256561396 1 1.064504513  
0.950480618 1.378377426 0.888197731 0.665765363 1 1.978008245  
1.006036278 0.526136865 0.269573471 0.216461167 1 1.191532568  
0.749350505 0.584549165 0.379540172 0.886050752 0.599802442  
YNR049C "YNR049C::MSO1::multicopy suppressor of sec1; small hydrophilic  
protein, enriched in microsomal membrane fraction, interacts with Sec1p" 1  
0.906515439 1.392508275 0.972892985 1.483082401 1 0.938129814  
0.979730245 1.681535732 1.475169825 1 0.910904272 1.108188801  
1.752261905 1.431449462 1 1.317430379 1.108186195 1.55894408  
1.829934233 1 2.001329416 2.348819211 3.348297871 2.258771636 1  
1.003559852 1.279156662 0.926247898 0.809190265 1.074709233 1  
1.121601812 1.345614144 1.743561473 2.080442884 1  
1.009719529 1.121028469 1.62417646 1.691705604  
YLL026w "YLL026w::HSP104::involved in thermal and ethanol tolerance,  
inheritance of [PSI+], and reactivation of mRNA splicing after heat shock" 1  
0.710672788 1.364542089 1.708177059 0.884108094 1 1.460749709  
1.842007002 1.141629478 0.82821096 1 1.295995512 2.191252178  
1.91261862 1.082532417 1 6.907150166 9.323179242 9.529409949  
3.710580067 1 3.566565644 3.233604977 4.671295488 3.10904172 1  
1.217429161 1.888300488 1.424219718 0.653461248 0.842474529 1  
3.783528732 1.764041147 0.899580098 0.676282476 0.539533124 1  
3.363540584 1.665000799 0.654207099 0.759753963 1.699906369 0.974569543  
YNR063W YNR063W::YNR063W::molecular\_function unknown 1 0.431164892  
0.099696159 0.363578274 0.306080038 1 0.423965662 0.425834796  
1.043940945 0.480361463 1 49.72691111 60.46537735 108.2630534  
54.22624537 1 7.8464342 15.4189653 25.02865684 13.48558922 1  
0.5794752 0.65599772 0.430754661 1.198219232 1 0.795658172  
1.289001454 2.859292383 2.937035941 1.677297242 1 0.805014715  
1.111057513 2.358657798 2.988523789 2.25755856 1  
1.099739302 0.706382101 6.722165488

|         |                                                                                                                                                                                                                                      |             |             |             |             |             |
|---------|--------------------------------------------------------------------------------------------------------------------------------------------------------------------------------------------------------------------------------------|-------------|-------------|-------------|-------------|-------------|
| YLR261C | YLR261C::VPS63                                                                                                                                                                                                                       | 0.76093533  | 1.048851382 | 0.805065152 |             |             |
|         | 1.386220112                                                                                                                                                                                                                          | 0.926206903 | 0.869918539 | 1.252106091 | 1.142381961 |             |
|         | 0.882522616                                                                                                                                                                                                                          | 1.02387005  | 1.090272111 | 0.992694903 | 1           | 1.026621237 |
|         | 0.68077318                                                                                                                                                                                                                           | 1.545842965 | 1           | 2.0733722   |             | 1.064876163 |
|         | 0.90891967                                                                                                                                                                                                                           | 1.158495037 | 0.818634538 | 0.644594157 | 0.903714544 | 1           |
|         | 0.855357688                                                                                                                                                                                                                          | 1.459009121 | 1.288132609 | 1.251544514 | 2.046680904 | 1           |
|         | 1.263521728                                                                                                                                                                                                                          | 1.441785518 | 1.046114763 | 1.784308346 | 1.64169436  | 1.921994622 |
| YNR065C | YNR065C::YSN1::Yeast Sortilin                                                                                                                                                                                                        | 1           | 1           | 0.952832234 | 0.810235437 |             |
|         | 1.195177047                                                                                                                                                                                                                          | 0.749323337 | 1           | 1.056334334 | 1.167570142 | 0.929281159 |
|         | 0.792750768                                                                                                                                                                                                                          | 1           | 1.120997826 | 0.994165824 | 0.674773926 | 1.055511198 |
|         | 0.746194674                                                                                                                                                                                                                          | 0.490779549 | 0.871820796 | 0.717945557 | 1           | 1.239822609 |
|         | 1.34121109                                                                                                                                                                                                                           | 1.333707806 | 1.109068927 | 1           | 0.903508887 | 1.033279408 |
|         | 1.046471386                                                                                                                                                                                                                          | 1.038356141 | 1.124725373 | 1           | 0.88708422  | 0.677758922 |
|         | 0.687985664                                                                                                                                                                                                                          | 0.773298171 | 0.615392012 | 1           | 1.070514739 | 0.823526867 |
|         | 1.15837318                                                                                                                                                                                                                           | 0.740409565 | 1.122438427 | 0.835345293 |             |             |
| YLR263W | "YLR263W::RED1::Required for full chr. pairing & chr. condensation seen by in situ hybridization, axial elements, stable localization of Hop1p & synaptonemal complexes; at HIS2 required for normal levels of double strand breaks" | 1           | 1.310515658 | 1.373806633 | 1.511596232 | 1           |
|         | 1.402308429                                                                                                                                                                                                                          |             | 1           | 1.031811795 | 1.028354034 | 1.063273709 |
|         | 0.722694831                                                                                                                                                                                                                          | 0.748619304 | 0.68996032  |             |             |             |
|         | 0.534869943                                                                                                                                                                                                                          | 1           | 0.840780135 | 0.917534084 | 0.875297225 | 0.724684536 |
|         | 1.021476615                                                                                                                                                                                                                          | 1           | 0.801713452 | 0.904277626 | 0.867966423 | 1.150797087 |
|         | 1.082812753                                                                                                                                                                                                                          | 1.199658659 | 1.210948555 | 1.095685071 | 1.978537058 |             |
| YNR067C | YNR067C::DSE4::Daughter Specific Expression 4                                                                                                                                                                                        | 1           | 1           | 0.712177962 |             |             |
|         | 0.60293135                                                                                                                                                                                                                           | 0.774715706 | 0.479354009 | 1           | 0.746972402 | 0.793963859 |
|         | 0.639047241                                                                                                                                                                                                                          | 0.581665393 | 1           | 0.884772022 | 0.668755295 | 0.439871475 |
|         | 0.582427013                                                                                                                                                                                                                          | 1           | 0.751652782 | 0.917643158 | 1.186962846 | 0.649655422 |
|         | 0.561471515                                                                                                                                                                                                                          | 0.580013794 | 0.621988676 | 0.641383846 | 1           | 0.875783537 |
|         | 0.96466438                                                                                                                                                                                                                           | 1.152890512 | 1.004909293 | 0.924215769 | 1           | 0.692980344 |
|         | 0.631947946                                                                                                                                                                                                                          | 0.566019889 | 0.286417954 | 0.454874953 | 1           | 0.818880758 |
|         | 0.805222635                                                                                                                                                                                                                          | 0.800545189 | 0.669540152 | 0.566384539 | 0.805574095 |             |
| YLR265C | YLR265C::NEJ1::Nonhomologous End-Joining regulator 1; Repressed by MAT heterozygosity; Interacts with Lif1p in a yeast two-hybrid assay                                                                                              | 1           |             |             |             |             |
|         | 0.833309024                                                                                                                                                                                                                          | 0.879890889 | 0.792772685 | 1.105051562 | 1           | 0.85341151  |
|         | 0.791466919                                                                                                                                                                                                                          | 1.044529191 | 1.004412979 | 1           | 0.65355404  | 0.697485607 |
|         | 0.806311022                                                                                                                                                                                                                          | 0.897973835 | 1           | 0.778769042 | 0.519470785 | 0.638722966 |
|         | 1.321254676                                                                                                                                                                                                                          | 1           | 1.383433307 | 1.070350974 | 1.55062437  | 1.077700599 |
|         | 0.866237056                                                                                                                                                                                                                          | 0.883122899 | 0.641541693 | 0.673133797 | 0.923341782 | 1           |
|         | 0.869285176                                                                                                                                                                                                                          | 0.718939162 | 0.473960886 |             | 0.732112621 | 1           |
|         | 0.804791656                                                                                                                                                                                                                          | 1.055387895 | 0.905401733 | 0.973693878 |             | 1.454879375 |
| YNR069C | YNR069C::YNR069C::molecular_function unknown                                                                                                                                                                                         | 1           |             |             |             |             |
|         | 1                                                                                                                                                                                                                                    | 1.320486552 | 1.51817864  |             | 1           | 3.305022622 |
|         | 2.540148067                                                                                                                                                                                                                          | 0.683819593 | 1.047205824 | 1           |             | 1.424113456 |
|         | 0.941657361                                                                                                                                                                                                                          |             | 0.285220921 | 0.271385416 | 0.173941436 |             |
|         | 0.826272938                                                                                                                                                                                                                          |             | 1.236639001 | 1.183826612 | 1           | 3.588313376 |
|         | 0.555444604                                                                                                                                                                                                                          |             | 1           | 2.049066849 | 0.599196655 |             |
|         | 0.831649191                                                                                                                                                                                                                          | 0.760041607 |             |             |             |             |
| YLR267W | YLR267W::BOP2::bypass of PAM1                                                                                                                                                                                                        | 1           | 1           | 1.920791983 | 1.985320367 |             |
|         | 1.336830528                                                                                                                                                                                                                          | 0.92489579  | 1           | 1.28819706  | 1.467622715 | 0.872367212 |
|         | 2.873361742                                                                                                                                                                                                                          | 2.580320239 | 1.97146511  | 0.708000199 | 1           | 0.862037647 |
|         | 0.896514939                                                                                                                                                                                                                          | 1.256760546 | 1.073793967 | 1           | 1.907545516 | 3.45084073  |
|         | 2.199315712                                                                                                                                                                                                                          | 1.599555466 | 1           | 1.030944616 | 1.344674938 | 1.135652554 |
|         | 0.953477673                                                                                                                                                                                                                          | 0.91390555  | 1           | 0.91851972  | 1.350329569 | 2.991358975 |
|         | 1.596795937                                                                                                                                                                                                                          | 1.218259289 | 1           | 0.812066562 | 1.035235484 | 1.088674454 |
|         | 0.802619548                                                                                                                                                                                                                          | 1.52650664  | 0.873872775 |             |             |             |

YNR071C YNR071C::YNR071C::molecular\_function unknown 1 1.052034159  
1.105846419 0.866881273 1.069824043 1.052034159  
0.758342538 1.328659501 0.935913455 1 1.718350019  
1.549480579 0.292205902 0.18263851  
0.969912938 1 1.042081343 0.826053156  
0.985921257 0.544145947 0.994082539 1.101535006  
YLR269C YLR269C::YLR269C::molecular\_function unknown 1 1.12989809  
1.345753756 1.118157024 1.429436809 1 1.04139462 1.06680504  
1.278228584 1.148337387 1 0.970819142 1.053579531 1.419096158  
1.042985508 1 0.816082062 0.462949638 0.677371761 1.06325487 1  
2.335588799 1.881194228 1.617234437 1 0.862365147 0.928086936  
0.63103123 0.681468416 0.827257696 1 0.978067223 1.344392783  
0.984576175 1.656831372 1 0.913668966 1.297476877 1.107855963  
1.375241678 1.883419725 1.184719311  
YLR271W YLR271W::YLR271W::molecular\_function unknown 1 1.491681686  
1.427114673 1.461118682 1.847483841 1 1.436141908 1.490873168  
1.770835066 1.818234057 1 1.074815759 1.464012852 1.575701344  
1.439551475 1 1.342186485 1.114885609 1.845006359 1  
2.032723261 2.733492552 1 0.894170021 1.230502333  
0.690262087 0.928244374 1 0.888067685 1.079481859  
2.149008833 1 0.947806603 1.075052256 1.234669364 2.360322857  
1.112042463  
YLR285W YLR285W::YLR285W::molecular\_function unknown 1 1.004792317  
1.010014614 0.84791625 1.07117794 1 0.910710617 0.802186273  
1.211046866 0.962340461 1 0.792990432 0.763235885 0.795185031  
0.87168776 1 0.612803901 0.471757652 0.372689559 0.669181775 1  
1.095200946 1.057241327 1.114892419 1 0.900094124 0.924673896  
0.78244174 0.832166071 0.859127272 1 0.884957175 1.050054075  
0.841560454 0.69543085 1.184139825 1 1.103342441 1.155092642  
0.959450328 1.315928287 1.251618273 1.056002518  
YLR287C YLR287C::YLR287C::molecular\_function unknown 1 1.030419878  
0.912277078 1.129945596 1.226319737 1 1.120271432 0.855604241  
1.192513333 1.126891153 1 0.685324629 0.708132262 0.638422809  
1.070732956 1 0.679461615 0.680189017 1.36926048 1  
0.615778958 0.763143238 0.738907812 0.76468745 1 0.85454139  
0.919123148 0.696072953 0.680462197 0.791094404 1 1.040663535  
1.255176382 0.621251066 0.738190447 1.334376595 1 1.05130933  
1.126587631 1.093196215 1.274276605 0.905292859 1.116420579  
YFL051C YFL051C::YFL051C::molecular\_function unknown 1.064563642 1  
1.02650248 2.595687885 1 0.955942677  
1.287923751 1  
1.189791776 3.043113765 1 1.048121951  
YFL053W YFL053W::DAK2::dihydroxyacetone kinase 1 0.93359246  
1 1.015486834 1.375551705 0.857510847 1 1.322125685  
1.267108546 0.810672184 0.833216881 0.42254506 0.71870519  
0.585877373 1 1.155312881 3.417332423 2.388730473 1.300354788 1  
0.947089731 1.083049925 1.096487935 0.940463532 0.862543135 1  
0.521842411 0.76396648 0.765392159 0.539920318 1 0.876782471  
0.688500252 0.819732367 1.163308729 0.816957217  
YFL055W YFL055W::AGP3::The acronym may be misleading. AGP3 has not been  
shown to be a general amino acid permease with broad substrate specificity  
1.09338287 1.072766524 0.809607384 1.09691959 1.203826624  
1.043259901 1.283998149 1.547440034 1.131171882 1.105278531 1  
1.594042832 0.812268834 1.823955248 1.249664496 1 1.109246439  
3.018820784 1.423743392 1.203556236 1 0.967794359 1.043357791  
1.574229139 1.150000819 0.828183846 0.843354497 0.8847779

1.018851068 0.791122486 1 1.069610216 1.041320481 1.063888945  
0.634620035 0.910648927  
YFL057C YFL057C::YFL057C::not yet annotated 1 1.501359171 1.404781294  
1.28400218 1.539293573 1 1.21836968 1.12759914 1.3790421  
1.593751135 1 3.067348435 3.73395915 3.205389163 1.553228659 1  
5.008545069 7.17139935 1 3.501735038 5.528886959  
5.544556245 1.747288068 1 1.980780472 3.84444281 4.319912133  
1.197868958 0.796329472 1 8.335615745 7.220431645 5.331481814  
2.401586454 1 2.442494927 5.139980168 2.700599466 1.273470816  
0.897857515 1.455287036  
YFL059W YFL059W::SNZ3::Snooze: stationary phase-induced gene family 1  
0.966514604 1.026363915 1.076445997 1 0.868664283 0.797182809  
1.42543539 1 0.93636187 1.272858937 1.357721382 1.49628032 1  
0.825013924 1.192662497 1.028672081 2.311815024 1 1.513981984  
3.454349321 2.613059487 2.383887175 1 1.185362194 1.213228035  
1.584490101 1.261148867 1.020905604 0.869437613 1.057595615  
1.509340454 2.20110693 1 0.752354592 0.971319121 1.13495024  
0.219075929 1.190848653  
YFL061W YFL061W::YFL061W::molecular\_function unknown 1 0.911748951  
0.821085623 0.806181151 1.049213868 1 0.589819324 0.770527751  
1.038200624 1 8.034766826 58.86539668 217.8974798 135.3895112 1  
2.22203118 6.626127922 18.31702018 21.36195538 1 0.816865246  
1.141272376 1.442605926 1.733666496 1 1.057204255 1.381106299  
3.96445046 3.088435463 1 1.252407479 1.709073423 1.439560531  
2.680569435 1 1.019733694 1.083015609 1.128003444 1.660759239  
7.724754534  
YFR007W YFR007W::YFR007W::molecular\_function unknown 1 0.96927785  
1.009233809 1.239317492 0.873483656 1 1.059805085 1.07286068  
1.133942483 1 1.016041834 1.168508782 1.178097142 1.093354363 1  
1.002522922 1.003023114 0.920665621 1 1.013750753  
0.720267529 1.076545583 1 1.022922255 1.194807738 0.985091953  
1.117638088 1 1.11293399 0.958200286 1.242067981 1.062478611  
0.718547204 1 0.988028075 0.804851916 0.992556161 0.267798826  
1.236801611 1.027982598  
YFR009W YFR009W::GCN20::Positive effector of the EIF-2-alpha kinase activity  
of GCN2; component of a heteromeric complex that includes GCN1 and GCN20  
1.108158271 0.94066364 1.375319601 0.98386384 1.276107336  
1.323550357 1.044084224 1.033347673 1.122443385 1.083102259  
0.661408338 1.229610225 1 0.857520737 0.665817003 0.725776403  
0.399919598 1 0.854652663 0.53476103 0.517382129 0.632916115 1  
0.827781272 0.83695174 0.888710822 0.949652954 0.91906998 1  
0.970719518 0.704884114 0.881574993 0.691127196 0.442850863 1  
0.95352949 0.74139488 0.719305602 0.55806235 0.729133102 0.575284973  
YDR431W YDR431W::YDR431W::molecular\_function unknown 1 1.266874289  
1.196239581 1.995640209 0.720226439 1 1.68115778 1.409608832  
1.011537313 1 2.343124853 2.193646659 1.626695941 1.377280185  
1.619022141 0.664269431 1 1  
0.832344314 0.814862399 0.915787722 0.980249579 1 1.021932057  
0.564228645 0.868577884 0.875525942 1 0.744571369  
0.788637471 0.142601978 0.921028305 0.736399802  
YFR011C YFR011C::YFR011C::molecular\_function unknown 1 0.635280932  
0.958789492 0.868713131 1.264702332 1 0.674308469 0.742432457  
1.119496896 1.169524338 1 0.723307356 0.928583277 1.450046384  
1.053287477 1 1.11393312 0.795356385 0.842955277 1.578276512 1  
1.980172169 1.996506106 2.280668699 1.493604879 1 0.918304838  
1.044953921 0.637492554 0.564060415 0.87241174 1 1.207186224

1.776705598 1.418313286 1.322325232 2.030574428 1 1.276847202  
1.472566973 1.025383033 0.936624501 1.888935242 1.514829537  
YDR433W YDR433W::KRE22::Killer toxin REsistant 1 1.655610699  
1.568332867 1.008383754 1.092209009 1 1.613489311 1.131780643  
1 1.506221497 1.26980021 0.965580427 1.19690357 1.141057771  
0.481031663 0.871483863 0.525364217 1 0.861886437  
0.411654426 1 1.085931387 1.041860175 0.807228491 0.993792738  
0.956762411 1 0.776834457 0.927745821 0.849067613 0.533113432  
0.616076281 1 0.919306861 1.032776526 0.977139653 0.90255621  
1.058483457 0.756539156  
YFR013W YFR013W::IOC3::Iswi One Complex 1 0.577279218 0.589620522  
0.743697682 0.554097767 1 0.797380674 0.90889308 0.673045649  
0.679476085 1 0.72248368 0.716609887 0.528823163 0.813289202  
0.877665205 0.815536765 0.862312438 1 1.018153354 1.110072957  
1.54024565 0.864521638 1 0.862248638 0.833858607 0.83767406  
0.783258185 0.919321153 1 0.970147693 0.75161056 0.990105179  
0.922165886 0.714809801 1 1.123373977 1.107737667 1.268295003  
0.672951546 1.181366552 0.80995221  
YDR435C YDR435C::PPM1::carboxy methyl transferase for protein phosphatase 2A  
catalytic subunit 0.967791598 0.95660709 0.988758681  
0.737333385 0.760080313 0.967679328 0.757136921 0.852519896  
1.124160506 1.06514009 0.550983879 1.03717337 0.59137858  
0.516890155 1 0.975656308 1.138704205 1.003716128  
1.141939909 1.272612464 0.655338575 0.997961311 1  
0.866888752 0.848523487 0.587277863 0.817366192 1.084898103  
YDR437W YDR437W::YDR437W::molecular\_function unknown 0.869288586  
0.846141741 0.747932315 0.999527649 0.814040088  
0.994646386 1.004831137 0.653228412 0.92220761  
1 1.031896158 1.197258706  
1.188008314 1.267716481 1 0.982702622 0.738397069 1.097108957  
1.295205809 0.718395814 1 0.86661883 1.272388944 0.22052917  
0.837055115 0.80732532  
YLR289W YLR289W::GUF1::Similar to E. coli elongation factor-type GTP-binding  
protein LepA 0.648888261 1.136036372 1.029875433  
0.97947897 1.156596217 1.419053553 1.122557578 1.079929086  
0.933684263 1.103320578 1 0.718278554 0.580589767 0.915410257 1  
1.716666273 1.869900135 1.792664044 0.812554815 1 0.942101868  
1.011491217 0.892346007 0.795449753 0.999235374 1 1.350287146  
1.005103631 1.203030998 1.156633898 1.163842021 1 1.580041244  
1.234778681 0.490131594 1.77552355 0.775802844  
YDR451C YDR451C::YHP1 1 0.812973446 0.873092211 1.105816497 1  
0.861510704 0.860874048 1.002887642 1 0.822377982 0.813929466  
0.751578196 1.142111386 1 0.559710273 0.597227386 0.91553477  
0.64549249 1 0.949565421 1.750364335 1.373779659 1.255777486 1  
0.990161082 1.029127323 1.151459497 0.947705849 0.903869713 1  
0.807460485 1.150226966 1.195823745 1.129250876 1.056422299 1  
0.78231305 1.180591816 1.022891778 1.048228098 0.866814627 0.885255897  
YLR291C "YLR291C::GCD7::translation initiation factor eIF2b, 43 kDa subunit;  
negative regulator of GCN4 expression" 1 0.859364389 0.63910845  
0.65794063 0.625530085 1 0.794016323 0.739556427 0.581300009  
0.641548597 1 0.743015064 0.564120229 0.643941174 1  
0.547077298 0.37072882 0.596396434 0.782091081 1 0.576549326  
0.61662286 0.621405887 0.611698074 1 0.848156251 0.65315014  
0.911799819 0.843965713 0.786246728 1 0.966038701 0.688646188  
0.664735519 0.709891848 0.616098916 1 1.039235915 0.824075804  
0.834544148 0.589845467 0.645959742 0.866867768



YDR453C YDR453C::TSA2::thioredoxin peroxidase 1 1.524337156  
1.644120483 1.352615674 1.810559969 1 1.101314884 1.366018869  
2.293862175 1 1.720102955 2.668816942 5.762494608 1  
2.679358579 5.383138782 5.593061503 1 1.754431818 3.850285678  
6.434056553 2.396963934 1 1.06025254 1.151893002 1.500582602  
0.894997322 0.968221327 1 0.990660389 1.95079802 2.268482792  
3.105763105 1.596840023 1 1.180455005 1.412772575 1.229190226  
1.052160444 0.801623192 2.006054487  
YLR293C "YLR293C::GSP1::maintenance of nuclear organization; homologous to  
mammalian Ran, a small nuclear GTPase of the ras superfamily" 1  
1.090905284 0.883488236 0.502774253 1 0.869434307 0.755452754  
0.564420446 0.676250683 1 0.987036776 0.810401424 0.780390448  
0.612518391 1 1.052364912 0.635841642 0.590133375 0.852682549 1  
1.182515546 0.723723178 0.712838952 0.979005445 1 1.057868101  
1.101334633 1.112150606 1.223792017 0.944668202 1 0.921419636  
1.110524022 0.666566003 0.679541465 0.979965857 1 0.954154423  
0.774406929 0.825801734 0.904099478 0.864149837 1.307306659  
YDR455C YDR455C::YDR455C::molecular\_function unknown 1 1.206726649  
0.809337197 1.052265051 0.920166193 1 1.117187211 1.090322019  
0.639403351 0.650473169 1 1.650070806 1.189383693 0.463460592  
0.965072089 1 0.767611301 0.648915017 1 0.931066149  
1.034909763 0.803936665 0.911221749 1 1.401779603 1.438696746  
2.199738178 1.773214216 1.10058616 1 1.307317534 0.96358732  
1.422680373 1.152290839 0.352462246 1 1.223555397 0.960774337  
1.170037168 0.578448146 0.816803992 0.927285829  
YLR295C YLR295C::ATP14::ATP synthase subunit h 1 0.951712101  
1.379709178 0.976266576 1.847319159 1 1.076768058 1.095799487  
1.39719485 1.643677871 1 0.820905138 0.827575327 0.885832234  
1.66845204 1 1.161516259 0.731892945 1.246830029 1  
2.131030996 1.794734698 2.398649103 1 1.041206624 1.013824504  
0.78014339 0.814523426 1.015326125 1 1.013277656 1.022979696  
0.877640388 0.778092615 1.27236609 1 1.09666378 0.96930231  
0.816087703 1.397079973 1.876827283 0.891385238  
YDR457W YDR457W::TOM1::Temperature dependent Organization in Mitotic nucleus  
1 1.427342514 1.200800803 1 1.246372465 1.237448917  
1.019006935 1 1.21565875 1.567000455 2.069390243 1  
1.01430071 1 0.873776493  
1.10388054 0.808644646 0.87315606 1 0.983255919 1.394504767  
0.809554166 1.065028512 1.082855672 1 0.886602103 1.410580482  
1.220370767 0.960429183 0.966688872  
YLR309C YLR309C::IMH1::Encodes a protein implicated in protein transport;  
induced under stress conditions. 1 0.559283636 0.802404545 0.82597443  
0.861271311 1 0.72074725 0.769656628 0.747197137 1  
0.962558565 0.985483016 0.787133172 0.93489686 1 0.81044951  
0.412267663 0.4289215 0.748064206 1 1.453395825 1.034772298  
0.896601467 1.086324146 1 0.772144822 0.900570004 0.747248987  
0.723120252 0.926909607 1 1.112616198 1.334313798 1.143943029  
1.419580121 1.234926422 1 1.096547946 1.351373492 1.049500585  
1.074576698 1.150638882 1.131306256  
YDR459C YDR459C::YDR459C::molecular\_function unknown 1 1.163025341  
0.804834259 0.80347406 0.980210476 1 0.868976637 0.834824934  
0.895579087 1 1.064301649 0.746622713 0.82882517 0.813682478 1  
0.869943517 0.956319151 1.41485495 1 0.988554254 1.563354513  
1.487527561 1.144792936 1 1.193154221 1.143145044 1.344463471  
1.496641979 1.244599443 1 0.901872254 1.315561922 1.378602513  
1.139793357 1.143465215 1 0.866741873 0.77098227 0.822913136  
0.762818132 0.737623347 1.068261305

YLR311C YLR311C::YLR311C::molecular\_function unknown 1  
1.457118094 1.524495237 1 1.436230037 1.734594066  
1.515734203 1 1.102399433 2.014847178 1.562715883  
0.290494632 0.918715113  
1.04557557 1.0335635 0.944432653 1 0.675934416  
1.809290297 1 1.433333486 0.727903088  
1.019226366  
YDR461W YDR461W::MFA1::a-factor mating pheromone precursor  
0.994031792 0.867366512 0.816030702 0.821589764 0.928810947  
0.80536687 0.898195846 0.911752042 0.958224112 0.895774956 1  
1.377705067 1.30300176 0.960308704 1.145410498 1 1.944865577  
2.030751845 1.606690977 1 1.090984935 1.02040984 1.026561311  
1.338384747 1.15058971 1 1.075097688 1.105408729 0.760454744  
0.75762255 0.838473983 1 0.931588535 0.830499522 0.88791058  
0.654704525 0.966994234 0.766171  
YLR313C YLR313C::SPH1::SPa2-Homolog; protein involved in shmoo formation and  
required for bipolar bud site selection (GB:AF008236). 1 0.689058955  
0.743818152 1.126506444 1 0.776977237 0.870242765 1.097125904  
1 0.638033182 0.538040408 0.553554751 0.813611854 1 0.413535442  
0.341163793 0.991599942 0.628363462 1  
0.676758933 0.780414088 1.06123803 1.197977845 1 1.147253125  
0.842194233 1.416914642 1.635301046 0.868508227 1 1.047420054  
0.714482593 1.220632244 0.41397658 0.891385238  
YLR315W YLR315W::NKP2::Non-essential Kinetochore Protein  
1.113083429 1.108069903 0.938124479 0.624582233 0.967371702  
0.98524867 0.698264473 0.733503401 1.192370075 0.981561348  
0.660239787 0.658859576 1 1.137425279 0.78363914 0.909305647 1  
1.121161668 1.070449579 1.124450435 1 1.184755292 1.03753261  
0.813644129 0.908544042 0.981017127 1 0.955661356 1.215943982  
1.006828081 0.786913638 1 0.810599053 0.879230434 0.424734364  
0.931457788 0.877375225  
YLR317W YLR317W::KRE34::Killer toxin REsistant 1 1.392483818  
0.838990736 1.100782305 1 1.049832767 1.079484615 1.134576225  
1.026144096 1 1.147087674 1.036088534 0.553383909 0.911339388  
0.552845287 0.552386741 0.310936839 1  
0.987731367 1.019592251 1.042245409 0.888065852 0.960756495 1  
0.976925969 1.046702392 1.225449485 0.980676576 1.409636869 1  
1.211298757 1.215294887 1.05446939 0.924337707 1.342281917 1.025355707  
YLR319C YLR319C::BUD6::actin interacting rotein 1 0.75927555  
0.774990932 0.888452184 0.683330625 1 0.857068506 0.834330602  
0.722595191 1 0.865378369 0.842849493 0.722375613 0.887305863 1  
0.854236864 0.488425503 1.030121976 0.669738809 1 1.288692172  
1.200828984 0.850964519 1.087328643 1 0.945842195 0.824121558  
1.048443917 0.955240736 0.972688688 1 1.167643221 1.060110563  
1.107855162 0.884662644 0.853461195 1 0.906679625 0.994321746  
0.973501799 0.475271466 0.919561776 0.922907714  
YFR015C YFR015C::GSY1::Highly similar to GSY2. GSY2 is the predominantly  
expressed glycogen synthase 1 1.760250673 0.658131039 1  
1.745077875 1.867878769 0.56907787 1 1.25531737 1.456273214  
1.465599191 0.670780885 1 2.960203532 2.138013607 1.220124659 1  
4.272208511 1.975031843 3.084332898 1.975784525 1 1.231783846  
1.502844394 2.157626142 1.396768501 1.668319713 1 1.164903209  
0.554654641 2.060722995 1.048711361 1.329429992 1 2.876575962  
1.103158165 1.617689143 1.85630128 4.409397598 0.773176006  
YFR017C YFR017C::YFR017C::molecular\_function unknown 1 1.228679867  
1.785286344 0.72335062 1 1.256122114 1.611453808  
0.947593955 1 2.158195499 2.768412648 7.172798975 1

|         |                                                                                                                                                               |             |             |             |             |             |
|---------|---------------------------------------------------------------------------------------------------------------------------------------------------------------|-------------|-------------|-------------|-------------|-------------|
|         | 3.775421715                                                                                                                                                   | 3.863159673 | 5.764750184 | 4.029622023 | 1           | 5.222953829 |
|         | 6.102055613                                                                                                                                                   | 2.883317004 | 1           | 1.089042388 | 1.344949999 | 1.059261247 |
|         | 0.966731229                                                                                                                                                   | 1           | 1.160837369 | 1.482483124 | 3.074547104 | 2.046050713 |
|         | 3.466300131                                                                                                                                                   | 1           | 1.396940267 | 1.314833204 | 1.254429961 | 0.918380558 |
|         | 2.700930045                                                                                                                                                   | 1.273157293 |             |             |             |             |
| YFR032C | YFR032C::YFR032C::molecular_function                                                                                                                          | unknown     |             |             | 1           | 1.530605033 |
|         | 1.820579299                                                                                                                                                   | 1.474713855 | 1.467895568 | 1           | 1.611836635 | 1.412317578 |
|         | 1.513774384                                                                                                                                                   | 1.634141525 | 1           | 1.42394392  | 1.536410987 | 1.687764393 |
|         | 1.270942792                                                                                                                                                   | 1           | 1.332165697 | 1.635133686 | 2.509969229 | 1.508340774 |
|         | 1.089295064                                                                                                                                                   | 2.834023903 | 1.062302555 | 1.003743353 | 1           | 0.802437207 |
|         | 1.190201207                                                                                                                                                   | 1.178209156 | 0.762396005 | 1.134249412 | 1           | 1.036181052 |
|         | 1.267170171                                                                                                                                                   | 1.32329264  | 1.058690293 | 0.948800549 | 1           | 1.086284873 |
|         | 0.879157003                                                                                                                                                   | 1.106297118 |             | 0.986828225 |             |             |
| YFR034C | YFR034C::PHO4::Transcription factor that activates expression of phosphate pathway                                                                            |             |             |             |             |             |
|         | 1                                                                                                                                                             | 1.884003013 | 1.904320411 | 1.737362985 | 1.68873676  | 1           |
|         | 1.762123753                                                                                                                                                   | 1.708654639 | 1.687056104 | 1.600183087 | 1           | 1.376972655 |
|         | 1.732096951                                                                                                                                                   | 2.022180286 | 1.464077225 | 1           | 1.776828583 | 1.415724483 |
|         | 1                                                                                                                                                             | 0.988312465 |             | 1           | 0.786288607 | 0.629156838 |
|         | 1.070471384                                                                                                                                                   | 0.920883345 | 1.075801416 | 1           | 0.75345886  | 0.422253377 |
|         | 0.480361126                                                                                                                                                   | 0.927325505 | 0.506646202 | 1           | 0.841595511 | 0.460064858 |
|         | 1.000901031                                                                                                                                                   | 0.669004815 | 0.782694894 | 0.514866912 |             |             |
| YFR036W | "YFR036W::CDC26::component of anaphase-promoting complex; required for ubiquitination of Clb2p and Clb3p, is a nuclear protein, and is induced by heat shock" |             |             |             |             |             |
|         | 1                                                                                                                                                             | 0.940108029 | 1.298703702 | 1.114203965 | 1.516410551 | 1           |
|         | 1.076510429                                                                                                                                                   | 1.201683231 | 1.384950607 | 1.473428919 | 1           | 0.960222967 |
|         | 1.061728488                                                                                                                                                   | 1.425270806 | 1.278825885 | 1           | 0.80680896  | 0.812968203 |
|         | 1.36460274                                                                                                                                                    | 1.409634962 | 1           | 0.902174267 | 2.014102125 | 1.679102717 |
|         | 0.974743329                                                                                                                                                   | 1           | 0.997426105 | 0.818009733 | 0.839009392 | 0.730290928 |
|         | 0.920375108                                                                                                                                                   | 1           | 1.021568001 | 1.308977976 |             | 1.725802897 |
|         | 0.78476163                                                                                                                                                    | 0.910366392 | 1.171628129 | 1.17001276  |             | 0.988579451 |
| YFR038W | YFR038W::YFR038W::helicase                                                                                                                                    |             |             |             | 1           | 0.594427166 |
|         | 0.777638022                                                                                                                                                   | 0.695988397 | 1           | 0.787399723 | 0.678937098 | 0.648476087 |
|         | 0.657419629                                                                                                                                                   | 0.539948319 | 0.369068402 | 0.790653904 | 1           | 0.848997284 |
|         | 0.65991948                                                                                                                                                    | 0.870269997 | 1           | 0.848092731 | 1.072686302 | 1.067885065 |
|         | 1.171336148                                                                                                                                                   | 1           | 0.883122459 | 0.891043473 | 0.728498483 | 0.798159946 |
|         | 0.91913905                                                                                                                                                    | 1           | 1.188592868 | 0.776019018 | 0.960686134 | 1.120198691 |
|         | 0.919190759                                                                                                                                                   | 1           | 0.899031015 | 0.848845353 | 1.03432477  | 0.897497298 |
|         | 0.929726829                                                                                                                                                   | 0.647086156 |             |             |             |             |
| YFR040W | YFR040W::SAP155::155 kDa SIT4 protein phosphatase-associated protein                                                                                          |             |             |             |             |             |
|         | 1                                                                                                                                                             | 1.160680429 | 1.213597823 | 1.492524484 | 1.23044166  | 1           |
|         | 1.333708654                                                                                                                                                   |             | 1.056308721 | 1           | 1.195230288 | 1.468543256 |
|         | 1.155351131                                                                                                                                                   | 1           | 1.097789227 | 0.889977447 | 0.870054873 | 0.709180037 |
|         | 1.114631579                                                                                                                                                   |             | 0.752383039 | 1           | 1.09584367  | 1.072934874 |
|         | 1.0125411                                                                                                                                                     | 0.85597895  | 1.067871652 | 1           | 1.500596356 | 1.33720139  |
|         | 2.011062261                                                                                                                                                   | 1.007803515 | 0.782604865 | 1           | 1.567960913 | 1.49636915  |
|         | 0.962372911                                                                                                                                                   | 1.138599873 | 1.267540819 | 0.87299711  |             |             |
| YDR475C | YDR475C::JIP4::Jumonji Interacting Protein                                                                                                                    |             |             |             |             | 0.821268424 |
|         | 0.975967018                                                                                                                                                   | 1.046584644 | 0.797859733 |             | 1.24947123  | 1.470733483 |
|         | 0.727308277                                                                                                                                                   |             | 1.519096309 | 1.682827706 | 0.633362767 | 1.205135407 |
|         | 1.174563559                                                                                                                                                   |             | 1.561139579 | 0.889818473 | 1           | 1.400340363 |
|         | 2.152868302                                                                                                                                                   |             | 0.875347209 | 1.144058471 | 0.984057501 | 0.896838387 |
|         | 1.080308439                                                                                                                                                   | 1           | 2.266000027 | 1.13403781  | 1.825617714 | 2.059847324 |
|         | 1.006072011                                                                                                                                                   | 1           | 0.939651131 | 0.727909155 | 0.946761942 | 0.395171137 |
|         | 0.77050189                                                                                                                                                    | 0.575284973 |             |             |             |             |
| YFR054C | YFR054C::YFR054C::molecular_function                                                                                                                          | unknown     |             |             | 1           | 1.384713627 |
|         | 1.374216623                                                                                                                                                   |             | 1.833224308 | 1           | 1.273239195 | 1.508634082 |
|         | 1.703423939                                                                                                                                                   | 1           | 1.267880083 | 1.385241304 | 1.47711695  | 1.334441029 |

|         |                                                                                                                                                                                       |             |             |             |             |             |             |             |             |
|---------|---------------------------------------------------------------------------------------------------------------------------------------------------------------------------------------|-------------|-------------|-------------|-------------|-------------|-------------|-------------|-------------|
|         | 0.426069841                                                                                                                                                                           | 0.589447941 |             | 0.872361475 | 1           |             | 0.713271848 | 3.049693775 |             |
|         | 0.952506234                                                                                                                                                                           | 0.978481261 |             |             |             |             |             | 1           |             |
|         | 1.099573691                                                                                                                                                                           |             |             |             | 1           |             |             |             |             |
| YFR056C | YFR056C::YFR056C::molecular_function unknown                                                                                                                                          |             |             |             |             |             | 1           | 1.161569923 |             |
|         | 1.197729036                                                                                                                                                                           | 1.505522682 | 1.414300922 | 1           |             | 1.514737444 | 1.432893923 |             |             |
|         | 1.721981107                                                                                                                                                                           | 1           | 1.226197166 | 1.077287141 | 0.798522692 | 1.634965292 | 1           |             |             |
|         | 0.565183957                                                                                                                                                                           |             | 0.253567066 |             | 1           | 1.760287006 |             |             |             |
|         | 1.571857586                                                                                                                                                                           | 1           | 0.692223557 |             | 0.861240662 | 0.990723517 | 1.162858948 | 1           |             |
|         | 0.730144914                                                                                                                                                                           | 0.806958775 | 1.366549107 | 2.020349203 | 0.695724229 | 1           |             |             |             |
|         | 0.982761472                                                                                                                                                                           |             | 1.637347144 |             | 1.062230381 | 0.72501668  |             |             |             |
| YDR477W | "YDR477W::SNF1::Required for release from glucose repression, invertase expression, and sporulation. Required for expression of catabolite-repressed genes when glucose is limiting." |             |             |             |             |             |             |             |             |
|         |                                                                                                                                                                                       |             |             |             | 1           |             | 0.795769694 |             |             |
|         | 0.7677953                                                                                                                                                                             | 0.555253485 | 1           | 0.928422498 | 0.977667046 | 0.696394308 |             |             |             |
|         | 0.532218369                                                                                                                                                                           | 1           | 1.080423907 | 1.106248665 | 0.813905471 | 0.620415901 | 1           |             |             |
|         | 1.682373754                                                                                                                                                                           | 1.693108595 | 1.728413296 | 0.933617727 | 1           | 1.016586824 |             |             |             |
|         | 0.984973106                                                                                                                                                                           | 1.308039477 | 0.870726362 | 1           | 0.982371213 | 0.997917853 |             |             |             |
|         | 0.842797515                                                                                                                                                                           | 0.939127286 | 1           |             | 0.546015028 | 0.919076564 | 0.772326816 |             |             |
|         | 0.444630071                                                                                                                                                                           | 1           | 0.775160162 | 0.695838098 | 0.991376727 | 0.400063133 |             |             |             |
|         | 0.919833461                                                                                                                                                                           | 0.804698482 |             |             |             |             |             |             |             |
| YDR479C | YDR479C::YDR479C::molecular_function unknown                                                                                                                                          |             |             |             |             |             | 1           | 0.807082494 |             |
|         | 0.75714664                                                                                                                                                                            | 0.721632859 | 0.549922069 | 1           | 0.818052029 | 0.807882742 |             |             |             |
|         | 0.622947841                                                                                                                                                                           | 0.581642568 | 1           | 1.091941018 | 1.086873736 | 1.206677004 |             |             |             |
|         | 0.680533643                                                                                                                                                                           | 1           | 1.62154806  | 1.437753001 | 1.454358495 | 1.137078138 | 1           |             |             |
|         | 1.750765918                                                                                                                                                                           | 1.296582755 | 1.977360333 | 1.115169185 |             | 1.094469289 |             |             |             |
|         | 0.994953454                                                                                                                                                                           | 1.081048873 | 0.923985924 | 1.047774867 | 1           | 1.025005697 |             |             |             |
|         | 1.017033932                                                                                                                                                                           | 1.265658118 | 1.027986005 | 0.924058702 | 1           | 1.167775114 |             |             |             |
|         | 1.117155142                                                                                                                                                                           | 1.008102043 | 0.744353858 | 1.064509246 | 0.985077    |             |             |             |             |
| YDR481C | YDR481C::PHO8::repressible alkaline phosphatase                                                                                                                                       |             |             |             |             |             | 0.781867233 |             |             |
|         | 0.79489498                                                                                                                                                                            | 0.863208729 | 0.725416026 |             | 0.882620679 | 0.855937117 |             |             |             |
|         | 0.95652809                                                                                                                                                                            |             | 1.136910998 | 0.868385636 | 1.117149061 | 0.858573328 | 1           |             |             |
|         | 1.410657485                                                                                                                                                                           | 1.746049547 | 1.452292874 | 1.06611741  | 1           | 1.255920684 |             |             |             |
|         | 1.364697877                                                                                                                                                                           | 1.13772522  | 0.77174964  |             | 1.002027182 | 0.909356166 |             |             |             |
|         | 0.813312437                                                                                                                                                                           | 0.849330168 | 0.921467736 | 1           |             | 1.00846297  |             |             |             |
|         | 1.014413158                                                                                                                                                                           | 0.95829245  | 1           | 0.979818181 | 1.098337447 | 0.817783018 |             |             |             |
|         | 1.324008845                                                                                                                                                                           | 0.625423174 | 0.875624    |             |             |             |             |             |             |
| YDR481C | YDR481C::PHO8::repressible alkaline phosphatase                                                                                                                                       |             |             |             |             |             | 0.709864318 |             |             |
|         |                                                                                                                                                                                       |             |             |             |             |             |             |             |             |
|         | 0.634156299                                                                                                                                                                           | 1.079028127 | 0.521620578 | 0.631535545 | 1           | 1.247993778 |             |             |             |
|         | 1.627806401                                                                                                                                                                           | 1.209959957 | 0.820464108 | 1           | 0.64556087  | 0.757506374 |             |             |             |
|         | 0.518470224                                                                                                                                                                           | 0.734839676 | 0.181185538 | 0.953554524 |             |             |             |             |             |
| YLR333C | YLR333C::RPS25B::Homology to rat S25; belongs to the S25E family of ribosomal proteins                                                                                                |             |             |             |             |             |             |             |             |
|         |                                                                                                                                                                                       | 1           | 1.217003709 | 1.229469707 | 0.683245584 | 1.686346956 | 1           |             |             |
|         | 0.759141622                                                                                                                                                                           | 0.780108464 | 1.34737258  | 1.322116673 | 1           | 0.871399979 |             |             |             |
|         | 0.917630092                                                                                                                                                                           | 1.101722669 | 0.877230825 | 1           | 0.718851381 | 0.359645879 |             |             |             |
|         | 0.435225661                                                                                                                                                                           | 0.663152703 | 1           | 2.031786623 | 1.953636435 | 1.269566051 |             |             |             |
|         | 1.155077194                                                                                                                                                                           | 1           | 0.946997525 | 0.967129999 | 0.754080666 | 1.016278448 |             |             |             |
|         | 1.246530879                                                                                                                                                                           | 1           | 1.339033471 | 1.705228452 | 1.204038353 | 0.899268877 |             |             |             |
|         | 1.982005175                                                                                                                                                                           | 1           | 0.941090976 | 2.014716892 | 0.846051675 | 1.61906161  |             |             |             |
|         | 1.000370905                                                                                                                                                                           | 1.8011585   |             |             |             |             |             |             |             |
| YDR483W | YDR483W::KRE2::N-glycosylation                                                                                                                                                        |             |             |             |             |             | 1           | 0.944047788 | 0.691350679 |
|         | 0.809533267                                                                                                                                                                           | 0.732248587 | 1           | 0.784006007 | 0.782052768 | 0.783511477 |             |             |             |
|         | 0.877548797                                                                                                                                                                           | 1           | 0.805103116 | 0.739622632 | 0.648102985 | 0.875341041 | 1           |             |             |
|         | 1.454427159                                                                                                                                                                           | 0.882486771 | 1.725441811 | 1.039478133 | 1           | 0.950786585 |             |             |             |
|         | 0.77344815                                                                                                                                                                            | 1.018609041 | 1.177150431 | 1           | 0.778338224 | 0.748763838 |             |             |             |
|         | 1.051242583                                                                                                                                                                           | 1.166159323 | 0.913416283 | 1           | 0.934419394 | 0.640402195 |             |             |             |

0.681657189 0.725301542 0.454945328 1 0.700322799 0.563051826  
 0.69046128 0.719781663 0.533789099 0.633076143  
 YLR335W YLR335W::NUP2::Localizes to discrete spots in the nuclear envelope;  
 probably functions in transport through nuclear pore 1 1.191601803  
 1.0602607 1.095804961 1.080534147 1 1.180604435 1.128912068  
 0.964140905 1.00784382 1 1.175635227 1.06379363 0.798789268  
 1.260449012 1 0.980221489 1.030122037 0.422276046 1  
 0.891954789 0.974723087 1 0.959370044 1.028429478  
 1.209295796 1.161613572 1.178416319 1 0.789786805 0.676912958  
 0.809271924 0.965212482 0.471205322 1 0.585326355 0.77369809  
 0.888106303 0.766545924 0.940015881 0.614688067  
 YDR485C YDR485C::VPS72 1 0.724279926 0.824709685 0.82290411 1  
 0.820843371 0.90376092 0.865350677 1 0.962011511 0.978384091  
 0.886748101 1.075190521 1 0.749513413 0.359335276 0.861946802  
 0.618806819 0.99745137 0.423982244 1 1.022413162  
 1.360019511 1.10224295 1.240016319 1.401387849 1 1.170925529  
 0.911865763 0.97531037 1.511682892 0.876983212 1 0.875057182  
 0.884074883 0.930544188 0.655387176 1.026304783 0.42818013  
 YDR499W YDR499W::LCD1::required for the DNA integrity checkpoint pathways; S.  
 pombe Rad26 functional homolog (putative) 1 0.585008864 0.637524517  
 0.683284721 1 0.607239082 0.723087091 0.643758826 1  
 0.610476573 0.672174145 0.472383762 0.752099042 1 0.573573993  
 0.310009117 0.748510342 0.860114345 1 1.145696681 1.868735731  
 1.78173117 2.765554182 1 0.932167279 1.026400554 0.893537894  
 0.984436735 1.081449989 1 1.105582201 1.26692499 0.971958556  
 1.05596751 1 0.948121236 0.97824046 1.210290173 0.902700679  
 0.850230918  
 YLR339C YLR339C::YLR339C::molecular\_function unknown 1 0.97798076  
 0.508041599 0.368692708 0.276754451 1 0.786111728 0.67641657  
 0.300042881 0.335252293 1 0.827233876 0.570336786 0.350752701  
 0.316161631 1 0.61842339 0.20736391 0.325713116 1  
 0.63346726 0.136657327 0.155431925 0.542254794 1 0.933301864  
 0.810224398 1.51066548 2.216611666 1.178040696 1 0.760161123  
 0.61566621 0.564939414 0.404552464 0.301823707 1 1.083061363  
 0.641461558 0.959339048 0.693109936 0.818809206 0.896639019  
 YDR501W YDR501W::PLM2::Plasmid Maintenance 1 1.085339427 0.979032838  
 0.930292378 1 0.881614379 1.097343502 0.909774542 1  
 0.85690111 0.843899541 0.813253287 1.026668142 1 0.713348681  
 0.801349001 0.841087242 1 4.048321649 2.709716092 1  
 0.840469784 1.438861252 1.420775593 1.116591384 0.932361256 1  
 1.399227935 1.305745827 2.574070394 2.038301274 0.612995497 1  
 1.497646659 1.189941984 0.856372689 0.7656897 0.769499072 0.908022036  
 YLR341W YLR341W::SPO77::Sporulation 1 1.050512501 0.948439733  
 0.903723033 1.018726101 1 0.908727737 0.913831973 0.896341234 1  
 0.825148706 0.720325762 1.081017547 1 0.592360155  
 0.640229571 0.925132684 1 1.069620847 2.248825188 2.407840303  
 0.583016267 1 0.747881983 0.782303141 0.785808734 0.939673747  
 0.785364131 1 0.563607677 0.631946779 1  
 0.766439977 0.788538705 0.870352372 0.567538164 1.085584816 1.469297049  
 YDR503C YDR503C::LPP1::Lipid phosphate phosphatase 0.959172554  
 0.919026105 0.878862771 1.026938505 0.843877448 0.946805271  
 0.973860319 0.982547597 1.069395613 0.991080804 1.145194702  
 1.084719851 1 1.502201392 0.488280437 1.232492807 1.633254714 1  
 1.893642136 1.451624308 1.97070264 1.912867482 1 1.034731398  
 1.437357295 1.280965851 1.023810769 0.968941407 1 0.948284448  
 1.495486912 1.380077583 1.090505888 1.058827128 1 1.359782922  
 1.542938404 1.24088815 1.305984437 1.325295164 1.186470537

YLR343W YLR343W::YLR343W::molecular\_function unknown 1 1.270277262  
0.987217728 1.091018185 0.886778472 1 1.056810056 0.960940326  
1.026857002 0.951580794 1 1.005402921 0.882053364 1.112205563  
0.894618404 1 0.821978781 0.603990573 0.839683495 1.016464802 1  
0.980984662 1.157909732 1.017519135 0.896323332 1 0.819579895  
0.763872867 0.821268654 1.120857357 1 0.844326013 0.957602562  
1.525478436 1.547771356 1.437017192 1 0.834038862 1.276043447  
0.981776422 0.856331398 0.883565852 1.332699689  
YDR505C YDR505C::PSP1::high-copy suppressor of cdc17 DNA polymerase alpha  
mutations 1 1.259159357 1.015062342 0.930320678 1 1.052212623  
0.938686363 1.002353029 1 1.063882884 1.122855149 0.871232238  
1.137323991 1 1.009522635 0.887070852  
1 1.026486468 1.060387898 0.946900811 0.772595273 1.010452594 1  
1.358256304 1.58624924 1.227231328 1.334242407 1.139345246 1  
0.883993617 0.956507412 0.897806271 0.762560701 0.954430189  
YLR357W "YLR357W::RSC2::RSC2 is a member of RSC complex, which Remodels the  
Structure of Chromatin. Also essential for the 2-micron plasmid to overcome  
maternal inheritance bias." 0.943165809 0.961162371 1.367492613  
0.81352321 1.159877429 1.35430505 0.907611303 0.937942718  
1.094713847 1.093679419 0.599474371 1.293244449 1 0.962167765  
0.43175039 0.785880575 1 0.97434978 0.557690042 0.801013911  
0.864175443 1 0.974375535 1.007837197 1.060172606 0.931354597  
0.967809083 1 0.931120018 0.653874595 0.774098583 1.109779574  
0.6534082 1 0.796518243 0.755592274 1.113519037 0.692364732  
0.850117701 0.786310354  
YLR359W YLR359W::ADE13::Adenylosuccinate Lyase 1 0.925185259  
0.616923772 0.705953209 0.731015916 1 0.970134797 0.810766472  
0.675428595 0.592015748 1 1.249852617 1.170712345 0.419900653  
0.623436516 1 2.181067593 2.143173782 0.944271586 0.380916334 1  
2.141935856 1.006629875 0.745829996 0.712906675 1 1.047369623  
0.725491796 1.239155162 2.091667699 1 0.869393095 0.821777648  
0.504248841 0.562142479 2.538157568 1 0.738923575 0.578606327  
0.485187852 1.032543933 2.776293712 0.779305347  
YLR361C YLR361C::DCR2::Dose-Dependent Cell cycle Regulator 1  
1.341066286 1.010545165 1.380714355 1.046627824 1 1.394720515  
1.183100911 1.258961015 0.986870197 1 1.533857689 1.600107801  
0.940119539 1.36195227 1 1.278806382 1.108528511 0.92411894  
1.026138388 1 1.538959975 1.460071591 1.4943378 1.409859955 1  
1.198094601 1.51069801 1.312365743 1.117259801 1 1.100899602  
0.964143772 1.23958545 0.991310206 0.575520208 1 0.795527459  
0.816736273 0.898412226 0.569066208 0.68792117 0.93078828  
YLR363C YLR363C::NMD4::putative Upflp-interacting protein  
1.285463664 0.922442583 1.056647962 1.133646095 1.041226097  
1.051151593 1.107689236 1.062161771 0.991080804 0.851884582  
0.992694903 1 0.395631314 0.395662287 0.652925986 0.824039176 1  
1.000562206 2.310338675 1.087647531 1 1.15394072 1.24894108  
1.266626201 1.29468364 1.332902094 1 1.223243095 1.294541017  
1.016679653 1.009430343 1.120487373 1 1.044323898 1.191510912  
1.105744782 0.895856545 1.240521796 1.127803701  
YDR236C YDR236C::FMN1::Riboflavin kinase 1 1.319345817 1.325807799  
0.99795454 1.541159335 1 1.048305495 1.10721214 1.442469591 1  
1.167874629 1.306589709 1.657155742 1.049004044 1 1.18274187  
1.034005619 0.811680034 1.730083909 0.604202666 0.95384079  
0.815367739 0.456596266 0.932410205 1.057540794 0.993150438  
0.917199011 0.978880058 1 0.952173798 1.086041284 1.499935854  
0.920327239 1.365300457 1 1.051543771 1.07714788 0.981275013  
1.719397037 0.972343858 1.225873579

YDR238C YDR238C::SEC26::Involved in endoplasmic-to-Golgi protein trafficking  
1 0.848341009 0.782917852 1.068114765 0.725305325 1 1.015399971  
0.983141614 0.666731769 0.725062935 1 0.913187406 0.845704076  
0.409595186 0.787174848 1 0.949971674 0.816371841 0.673769334  
0.669999698 1 0.611968398 0.360581849 0.365019954 0.642151491 1  
1.179622008 1.125975479 1.144901662 1.264368858 1.104389123 1  
1.173490904 0.506733755 1.186969964 0.757922201 0.284023196 1  
1.064030622 0.699250266 1.03269254 0.650216558 0.826719219 0.470210088  
YDR240C YDR240C::SNU56::Snurp = Small nuclear ribonucleoprotein particle of  
MW 56 kDa. Associated with the U1 snRNP; no counterpart in mammalian U1 snRNP.  
Serine-rich. 1 0.941784365 0.815604921 1.024252647 0.971244605 1  
0.95676409 0.982749515 0.958340151 1.034429968 1 0.742376617  
0.811170413 0.646056638 1.033830586 1.301032826 1  
0.824399834 1 0.929803334 0.81675477  
0.931466732 1.085718547 0.918854624 1.205310726 1.029935544  
1.357668269 1 0.884413662 0.933274781 1.084634864 1.038977241  
0.911524592  
YEL076CA YEL076CA::YEL076C-A::molecular\_function unknown 1  
0.586873181 1.174659603 0.453269463 1 1.18931828 0.90507406  
0.533609107 0.424308102 1 0.891229038 0.77628216 0.22447169  
0.733416672 1 0.809380541 0.556513599 0.757238075 0.594556295 1  
0.541116549 0.442152931 0.496755361 0.383202328 1 0.973341474  
0.86038001 1.216272555 1.295113487 1.167600374 1 0.749977418  
0.355221835 0.941947163 1.00589975 0.29440191 1 0.679016272  
0.437667394 0.951002243 0.575157072 0.654935876 0.671603625  
YGL001C "YGL001C::ERG26::one of three enzymatic activities required for the  
conversion of 4,4-dimethylzymosterol to zymosterol." 1 1.109186943  
1.074793522 1.204921821 1.053965978 1 1.136614915 1.1792362  
1.128748688 1.13100758 1 0.913893222 1.013040947 1.051518602  
0.996301836 1 1.146233207 0.874452074 1.02722413 1.48621074 1  
1.425816102 1.007845039 1.146421498 1.242069462 1 0.886046763  
0.948306891 1.121205933 1.690949986 1.210678026 1 0.845134619  
0.651639741 0.805932018 1.241331595 1.153512992 1 0.894488471  
0.696242262 0.990133913 0.994452725 1.146201134 0.950927634  
YHR139CA YHR139CA::YHR139C-A::molecular\_function unknown 1 1.525313689  
1.768825212 1.330662977 1.768327292 1 1.431324401 1.38829938  
1.638136508 1 1.374125663 1.496530752 1.59825534 1.491335115 1  
4.740678561 0.193251715  
1.087621743 0.869778938 0.83756025 0.993793852 1.200874355 1  
1.03775653 1.118720561 1.142370515 1.146368977 1.051215004 1  
1.166175592 1.021222705 0.809340543 1.32945567 0.89060161 1.554232579  
YGL003C YGL003C::CDH1::CDC20 homolog 1 1 0.701697587 0.744952788  
0.838993598 0.557904197 1 0.858661133 0.942942487 0.701470988  
0.647745108 1 0.813454402 0.861016666 0.67215564 0.815764829 1  
0.534748893 0.406320741 0.871533824 0.909790035 1 0.791470441  
1.627273997 1.415910707 0.787964794 1 1.138466829 1.013160796  
1.166878273 1.005828805 0.985825319 1 0.942871633 0.805892732  
0.867517828 0.769893019 0.504575736 1 1.080004576 0.799482552  
0.832779911 0.870656257 0.870033129 0.942171402  
YGL005C YGL005C::COG7::<b><u>C</u></b>onserved <b><u>O</u></b>ligomeric  
<b><u>G</u></b>olgi complex <b><u>7</u></b><br> Complexed with Cog8p 1  
0.724785838 0.915387975 0.83129048 1.1790663 1 0.843995746  
0.792579261 1.055754791 0.920075472 1 0.724447376 0.97786712  
1.099767452 0.881106815 1 0.860233913 0.614710938 1.102796079 1  
1.101359672 2.851705083 3.44759703 1.154502326 1 1.069204438  
1.199706469 0.925403367 0.88805936 1.161918288 1 1.16737058

|         |                                                                              |             |             |             |             |             |
|---------|------------------------------------------------------------------------------|-------------|-------------|-------------|-------------|-------------|
|         | 1.368404675                                                                  | 1.58561069  | 1.045823486 | 1.575768364 | 1           | 1.435630688 |
|         | 1.532727056                                                                  |             | 1.586096025 | 1.46911893  | 1.317814116 |             |
| YML009C | YML009C::MRPL39::Mitochondrial ribosomal protein MRPL39 (YmL39)              |             |             |             |             | 1           |
|         | 1.306980298                                                                  | 1.955112257 | 1.301374384 | 2.505991395 | 1           | 1.243834082 |
|         | 1.353349551                                                                  | 2.548312037 | 2.010852901 | 1           | 1.141897526 | 1.281584354 |
|         | 1.870576491                                                                  | 1.374982058 | 1           | 0.866283807 | 0.546803055 | 0.650536497 |
|         | 1.609538208                                                                  | 1           | 1.723808799 | 2.96081477  | 3.20496942  | 1.675825658 |
|         | 0.926236965                                                                  | 1.127739206 | 0.541590682 | 0.66313551  | 0.993544863 | 1           |
|         | 1.137722314                                                                  | 2.002084266 | 1.506722403 | 1.095354143 | 2.345663211 | 1           |
|         | 1.28438555                                                                   | 1.907690588 | 1.138801842 | 2.042311003 | 1.990312836 | 1.253893604 |
| YGL007W | YGL007W::YGL007W::molecular_function unknown                                 |             |             |             |             | 1           |
|         | 1.432153815                                                                  | 1.66124938  | 1.498588405 | 1           | 1.378208668 | 1.524457227 |
|         | 1.636692711                                                                  | 1           | 1.049269624 | 1.422514584 | 1.494248987 | 1.659923895 |
|         | 0.970172532                                                                  |             | 1           | 0.608597241 |             | 1           |
|         | 0.756660589                                                                  | 0.874137628 | 1.0113823   | 0.818399096 | 0.82598443  | 1           |
|         | 0.848082498                                                                  | 0.89066815  | 0.899048974 | 0.759445647 | 0.73745935  | 1           |
|         | 1.053250346                                                                  | 0.932575444 |             | 1.306230368 | 0.822210945 |             |
| YML036W | YML036W::YML036W::molecular_function unknown                                 |             |             |             |             | 1           |
|         | 1.523580179                                                                  | 1.069535664 | 1.666808516 | 1           | 1.173533971 | 1.164098979 |
|         | 1.347922542                                                                  | 1           | 1.085562774 | 1.103464309 | 1.563378868 | 1.138696913 |
|         | 1.00540886                                                                   | 0.647417917 | 0.586556494 | 1.044829382 |             | 0.621665154 |
|         | 0.485948895                                                                  | 1           | 1.023502594 | 0.97062404  | 0.751102367 | 0.910919017 |
|         | 0.893999386                                                                  | 1           | 1.063826822 | 1.201592849 | 1.119927758 | 0.934556689 |
|         | 1.202285864                                                                  | 1           | 1.062049827 | 1.29619892  | 0.922170681 | 1.278387663 |
|         | 1.058644099                                                                  | 1.25652039  |             |             |             |             |
| YMR201C | YMR201C::RAD14::Involved in nucleotide excision repair                       |             |             |             |             | 1           |
|         | 0.983314512                                                                  | 1.099136994 | 1.065305066 | 1.260823046 | 1           | 0.896758427 |
|         | 0.970347094                                                                  |             | 1.127921656 | 1           | 1.007724896 | 0.958494069 |
|         | 1.094761056                                                                  | 1           | 0.863846334 | 0.539695829 | 0.845152103 | 1.14720379  |
|         | 0.619333685                                                                  | 0.640739502 | 0.822637042 | 0.597923713 | 1           | 0.937173563 |
|         | 1.016296881                                                                  | 0.917384165 | 0.882442522 | 1.177611488 | 1           | 0.993497909 |
|         | 1.010198002                                                                  | 0.978932399 | 1.140004797 | 0.956024907 | 1           | 1.005831122 |
|         | 1.098337447                                                                  | 0.830160273 | 1.091359669 | 0.845867411 | 1.14969428  |             |
| YGL021W | YGL021W::ALK1                                                                |             |             |             |             | 1           |
|         | 1.118850396                                                                  | 1           | 1.179131877 | 1.102665902 | 0.805507773 | 0.896965666 |
|         | 0.888462486                                                                  | 0.894739691 | 0.752481725 | 1.006300696 | 1           | 1.270556687 |
|         | 0.655914713                                                                  | 1.02758478  |             | 1           | 0.9587372   | 1.004615162 |
|         | 0.563376116                                                                  | 1           | 0.870867517 | 0.890589477 | 0.876927368 | 1.154256724 |
|         | 1.005335876                                                                  | 1           | 0.798092093 | 0.399308343 | 0.474367173 | 0.512756377 |
|         | 0.607016198                                                                  | 1           | 0.819217986 | 0.550747718 |             | 0.888040313 |
|         | 0.635703034                                                                  |             |             |             |             |             |
| YGL023C | YGL023C::PIB2::Phosphatidylinositol 3-phosphate binding                      |             |             |             |             | 1           |
|         | 0.616290549                                                                  | 0.716379743 | 0.602498795 |             | 1           | 0.791541035 |
|         | 0.54037403                                                                   | 0.545131922 | 1           | 0.754684465 | 0.703925001 | 0.717762611 |
|         | 0.65334531                                                                   | 1           |             | 0.663026559 | 0.883719456 | 1.02806174  |
|         | 1.110234272                                                                  | 1.602433686 | 1.273189569 |             | 1           | 0.842705012 |
|         | 0.918639869                                                                  | 0.871096621 | 0.919833665 | 1           | 1.332906876 | 1.092377386 |
|         | 1.299639433                                                                  | 1.167981235 | 0.884740556 | 1           | 0.987214086 | 0.882526571 |
|         | 1.032543933                                                                  | 0.878403074 | 0.761792884 |             |             |             |
| YGL025C | "YGL025C::PGD1::Probable transcription factor, polyglutamine domain protein" |             |             |             |             | 1           |
|         | 0.9798328                                                                    | 1.068028323 | 0.875765915 | 0.901708376 | 1           | 1.044729819 |
|         | 1.018394861                                                                  | 1.086605184 | 0.92136412  |             | 0.948399654 | 0.450275156 |
|         | 0.815536765                                                                  | 1.15112528  | 1           | 1.216649626 | 1.378341015 | 1.240507342 |
|         | 0.731670065                                                                  | 1           | 0.904549615 | 1.179177395 | 0.832174958 | 0.824961757 |
|         | 1.027006986                                                                  | 1           | 0.885712749 | 1.032965413 | 0.860464776 | 0.911682457 |



1.01770259 1 0.905142549 0.702443989 0.709613977 1.03705289  
0.8969817 0.854609034  
YGL027C "YGL027C::CWH41::Glucosidase I, involved in assembly of cell wall  
beta 1,6 glucan; an ER type II integral membrane N-glycoprotein" 1  
0.782681085 0.82731676 1.131680408 0.962532772 1 0.933530044  
1.113490765 0.784265865 0.844880494 1 0.946520669 0.933430574  
0.574955651 1.049028596 1 1.017241364 0.787205973 0.939006749  
0.763469877 1 0.987350545 1.01770148 0.805479123 0.863414691 1  
1.005411239 1.08878685 1.310399652 1.222763836 1.134008976 1  
1.120799492 0.959013933 1.796471014 1.159438487 0.571425161 1  
0.91862251 0.857318265 1.096545176 0.792000901 0.894448834 0.719762951  
YGL029W YGL029W::CGR1::Coiled-coil growth-regulated. May contribute to  
compartmentalization of nucleolar constituents. 1 0.599060879 0.939805726  
0.787687151 1.221345777 1 0.641214464 0.658720142 1.309263156 1  
0.58861566 0.483343583 0.689953184 0.856696068 1 0.317046557  
0.228473461 0.390482217 0.469952333 1 0.68131041 1.778482798  
1.359680583 0.890719295 1 0.640767937 0.520145966 0.338372695  
0.435133856 0.860055307 1 0.766625133 0.997381112 0.85510747  
1.994908461 2.298076399 1 0.640607142 0.906020078 1.403972835  
1.001713903  
YDR507C YDR507C::GIN4::Growth inhibitory gene 1 1.226873153  
1.494469604 1 1.121842626 1.278067171 1  
1.120768107  
1 0.972909512 0.84747822 1.042386282 1.209282179 1.181212041 1  
0.656320528 0.763694588 0.745781444 0.983018322 0.717872397 1  
0.411468285 0.394286709 0.49421133 0.573635518 0.578593248 0.949176408  
YGL031C YGL031C::RPL24A::Homology to rat L24 1 1.231899764  
1.69958218 1.053444732 2.523459985 1 1.243296188 1.063823957  
1.754438669 1 1.127491771 1.00092182 0.928822783 1.074703045 1  
0.633651191 0.33717943 0.142748852 0.47415996 1 1.356661504  
0.880716742 0.521473472 0.840869299 1 1.522740767 1.097534258  
0.870724145 1.159946174 1.359183223 1 1.44131183 1.450373398  
1.529245242 0.711959112 1.824567265 1 1.352334837 1.397312069  
0.885833995 1.981273673 1.036766114 1.874711012  
YDR509W YDR509W::YDR509W::molecular\_function unknown 1 1.54236336  
1.203235349 1.290227405 1.155869591 1 1.272381353 1.107831902  
1.293390997 1.244442559 1 1.185392009 1.1339594 1.084659861  
1.191799035 0.846020825 1.01565527 1  
0.622517814 1 0.723733685 0.788629242 0.931186442 0.999603616 1  
1.291102534 0.88313454 0.924930496 1.033194821 1 0.461783062  
0.744396354 0.643192097 0.858111537  
YDR523C "YDR523C::SPS1::dispensable for mitosis, involved in middle/late  
stage of meiosis, required for spore wall formation"  
1.046069019 1.145612407 1.129991713  
0.526739498 1  
0.737254638 0.645201078 0.903287173 1  
1 0.821012669 0.439572034 0.565653128  
YDR525W YDR525W::API2::<i>API</i>cal 2 0.83817005  
0.935888216 1.183573513 0.970969692 1.293180495 1.066801388  
0.793305847 1 0.791884285 0.719735876 0.476180897  
0.570207784 1 1.292249138 0.793664277 1 0.909313205  
0.928241603 1.407112401 1 0.475735749  
0.850675427 0.900358688 1 0.534470418 0.803195553  
0.920875991 0.436936387  
YLR365W YLR365W::YLR365W::molecular\_function unknown  
0.129369523 0.243427924 1 0.579155148 4.125346598

|         |                                                                                                                                                |               |               |               |               |
|---------|------------------------------------------------------------------------------------------------------------------------------------------------|---------------|---------------|---------------|---------------|
|         | 0.936975258                                                                                                                                    | 0.749206424   | 1.055845382   | 1             | 0.839769082   |
|         | 1.025016987                                                                                                                                    | 1.346920838   | 1.220283665   | 1.910002157   | 1 0.795850954 |
| YDR527W | YDR527W::YDR527W::molecular_function unknown                                                                                                   |               |               |               | 1 0.687124872 |
|         | 0.730660232                                                                                                                                    | 0.849106786   | 0.856279538   | 1 0.671606008 | 0.663424678   |
|         | 0.845673271                                                                                                                                    | 0.861199321   | 1 0.681872774 | 0.703367793   | 0.523260522   |
|         | 1.029682772                                                                                                                                    | 0.831129394   | 0.535801184   | 1.241894993   | 1             |
|         | 0.711620775                                                                                                                                    | 0.717964888   | 1.389212034   | 1 0.750124723 | 0.6958188     |
|         | 0.789375366                                                                                                                                    | 0.765701236   | 0.984166548   | 1 1.012709476 | 0.906472684   |
|         | 0.989605561                                                                                                                                    | 1.414281999   | 1.656761924   | 1 0.696130595 | 0.934858124   |
|         | 1.087571143                                                                                                                                    | 0.814379845   | 0.816523232   | 0.779305347   |               |
| YLR367W | YLR367W::RPS22B::Homology to rat S15a                                                                                                          |               |               |               | 1 1.095174744 |
|         | 0.954234664                                                                                                                                    | 0.615314049   | 0.835756358   | 1 0.851446342 | 0.756917005   |
|         | 0.972546468                                                                                                                                    | 0.918725161   | 1 0.880935218 | 0.769339205   | 0.66443069    |
|         | 0.751952005                                                                                                                                    | 1 0.737808275 | 0.207035023   | 0.521696032   | 1             |
|         | 1.497555301                                                                                                                                    | 0.912482888   | 0.665112133   | 0.990270216   | 1 1.647608825 |
|         | 1.40653359                                                                                                                                     | 1.515014628   | 1.670500667   | 1.621239489   | 1 0.89338203  |
|         | 1.298480629                                                                                                                                    | 0.710263965   | 0.538641538   | 1.214994682   | 1 1.185990862 |
|         | 1.183891002                                                                                                                                    | 0.68753102    | 1.258141743   | 0.69152188    | 1.313436      |
| YDR529C | YDR529C::QCR7::ubiquinol-cytochrome c oxidoreductase subunit 7 (14 kDa)                                                                        |               |               |               | 1 1.139586771 |
|         | 1.162878051                                                                                                                                    | 1.674799942   | 1 0.907832145 | 0.824897972   | 1.79457723    |
|         | 1.089129494                                                                                                                                    | 1 0.929699852 | 0.522320174   | 0.732140721   | 1.514315041   |
|         | 1.592087435                                                                                                                                    | 1.270970221   | 2.8173222     | 1.940705078   | 1 0.633284542 |
|         | 0.307212204                                                                                                                                    | 0.203564467   | 0.571998608   | 0.714367918   | 1 0.547318699 |
|         | 0.427217072                                                                                                                                    | 0.206147234   | 0.501744355   | 1.955626022   | 1 0.446781213 |
|         | 0.246106321                                                                                                                                    | 0.543674189   | 1.09483195    | 2.011170913   | 1.069136866   |
| YLR381W | YLR381W::CTF3::kinetochore-related protein                                                                                                     |               |               |               | 1.415980021   |
|         | 0.923167785                                                                                                                                    | 0.909256712   | 0.944137842   |               |               |
|         | 0.988618231                                                                                                                                    | 1.078586392   |               |               |               |
|         | 1 0.951964057                                                                                                                                  | 0.945131208   | 0.888386808   |               |               |
|         | 1.039017626                                                                                                                                    | 1 0.810367672 | 0.959570497   | 0.891210346   | 0.823019362   |
|         | 1.173750715                                                                                                                                    | 1 0.82400911  | 0.872744195   | 0.649475356   | 0.842496528   |
| YDR531W | YDR531W::YDR531W::molecular_function unknown                                                                                                   |               |               |               | 1 0.947374164 |
|         | 0.85082899                                                                                                                                     | 0.796198101   | 0.716588068   | 1 0.766652985 | 0.824992909   |
|         | 0.895987825                                                                                                                                    | 0.830955224   | 1 0.881541063 | 0.88375135    | 0.681317321   |
|         | 0.771965902                                                                                                                                    | 1 1.10172141  | 0.912421169   | 1.043614501   | 1             |
|         | 1.798594378                                                                                                                                    | 1.77676604    | 2.292812268   | 2.016407895   | 1 1.066283381 |
|         | 0.998275157                                                                                                                                    | 1.267104607   | 0.986300971   | 0.937730611   | 1 1.026519911 |
|         | 1.290850818                                                                                                                                    | 0.862280705   | 0.792987023   | 0.83347609    | 1 1.134191608 |
|         | 0.97150457                                                                                                                                     | 0.85903833    | 1.110648635   | 0.683103819   | 1.114669354   |
| YLR383W | "YLR383W::RHC18::Protein involved in recombination repair, homologous to S. pombe rad18. Structural maintenance of chromosomes (SMC) protein." |               |               |               | 1.05337062    |
|         | 0.871751201                                                                                                                                    | 0.91333202    | 1.137154437   | 1.05337062    |               |
|         | 0.984321892                                                                                                                                    | 1.085201389   | 1.021559617   | 0.95528908    | 1.00067454    |
|         | 0.896944005                                                                                                                                    | 0.528191823   | 1.715188703   | 1 0.863025329 | 0.289067332   |
|         | 0.678607304                                                                                                                                    | 0.50175597    | 1             | 1.227250403   |               |
|         | 1.17385853                                                                                                                                     | 1.17674854    | 1.23104653    | 1.242092509   | 1 0.924787228 |
|         | 1.224540059                                                                                                                                    | 0.863328321   | 0.885205701   | 1.060468853   | 1 1.34811127  |
|         | 1.550599539                                                                                                                                    | 1.070707739   | 1.736329793   | 1.241492639   | 0.551643116   |
| YDR533C | YDR533C::YDR533C::molecular_function unknown                                                                                                   |               |               |               | 1 1.072847502 |
|         | 1.163468889                                                                                                                                    | 1.248180091   | 1.526129334   | 1 1.071785957 | 1.293385996   |
|         | 2.320033978                                                                                                                                    | 3.128398586   | 1 4.29930518  | 9.22201035    | 12.36150102   |
|         | 5.088110071                                                                                                                                    | 1 5.140651745 | 10.00038287   | 13.98494877   | 11.97416114   |
|         | 5.878180672                                                                                                                                    | 8.971358947   | 20.49735908   | 9.661397523   | 1 2.48249553  |
|         | 5.119678481                                                                                                                                    | 8.275146628   | 2.739840601   | 1.507647877   | 1 3.193833997 |

7.778389014 9.556329261 4.265301779 1.67449545 1 4.312998674  
6.525863489 6.4739171 2.029787278 1.81175706 6.362283804  
YLR385C YLR385C::YLR385C::molecular\_function unknown 0.983798344  
0.923581386 0.725416026 1.326845395 0.848732813  
1.094713847 0.963580201 0.488460603 1.459672654 1 0.218303743  
0.715168237 0.508912112 1 0.94509641 3.067949009 1.292264089  
1.153125035 1 0.833073567 0.79588963 0.838579883 0.963113873  
0.976891203 1 0.848276374 0.447450458 1.286735255 0.613901909 1  
0.460590387 0.465497116 0.872289293 0.361168813 0.695007477 0.419423898  
YEL002c YEL002c::WBP1::wheat germ agglutinin-binding protein 1  
0.889376502 0.708185548 0.91195267 0.704001577 1 0.889970586  
0.920352662 0.940150698 0.844587587 1 0.941974185 0.886278778  
0.768608775 0.915532923 1 1.277992013 0.930589793 1.126162353  
0.757180199 1 1.012384474 0.544599971 0.541984661 0.72577777 1  
0.899367394 0.989304812 1.279146748 1.148332393 0.925477941 1  
0.988472163 0.828247334 0.972999621 1.039119378 0.461170388 1  
1.153684004 0.829193449 1.083245997 0.66288316 0.882689636 0.633076143  
YLR387C YLR387C::YLR387C::molecular\_function unknown 1 0.817333388  
0.864626178 0.911641798 0.768667567 1 0.845238753 0.833925905  
1.018166407 0.899220662 1 0.968841555 1.087263066 1.131757426  
0.920289244 1 1.756724817 1.649011226 1.54294577 1  
2.2473761 1.37943626 1.455814322 1 1.132926137 1.312311377  
1.485704563 1.07024153 1.11614396 1 1.516004224 1.648200701  
1.277175088 1.002917869 0.763093639 1 0.973623108 1.15979042  
0.883485239 1.014893574 0.718416648 1.062131964  
YEL004w "YEL004w::YEA4::Shows sequence similarity to GOG5, a gene involved  
in vanadate resistance" 1 1.114655454 0.941449572 1.047608243 0.946186288 1  
0.971240668 0.956225124 1.214348609 1.015438604 1 1.191098947  
1.073034279 1.112737239 1.05511415 1 1.123442272 0.656473344  
1.351037571 2.099151968 1 1.678344384 3.402805309 3.080814464  
1.21087862 1 1.507885939 1.331926325 1.102188234 1.036554836 1  
1.04758078 1.406640062 1.524663237 1.196153496 1.546399576 1  
1.541049886 1.338889383 0.95908234 1.356441906 1.105913122  
YLR389C YLR389C::STE23::involved in a-factor processing 1 0.699468473  
0.603564448 0.86040111 0.507470325 1 0.852702433 0.86859172  
0.614129479 0.595085744 1 0.932390304 0.744938466 0.488071802  
0.841798647 1 1.026402772 1.025000322 0.561028394 1  
0.8277341 0.658621315 0.684688538 0.679209983 1 0.959343767  
0.946231637 1.500092108 1.439556939 0.994221838 1 0.887015926  
0.680841831 1.012764518 0.934479378 0.385080595 1 0.950075406  
0.958920116 1.291369779 0.788748867 0.902931984 0.457951354  
YLR391W YLR391W 1 1.921948598 1.436498121 0.884942694 1.06676204 1  
1.352131327 1.195465798 1.011004282 0.972613205 1 1.765159587  
1.353316304 1.92060399 1.032656849 1 1.069526539 0.969304704  
1.328913474 0.941625336 1 0.632463958 0.996494592 0.790882626  
0.644305948 1 1.2166597 0.980000709 1.225066077 0.543628877 1  
0.741956781 0.852147415 0.723738962 0.652361911 0.78187002 1  
0.647888383 0.770867545 0.538408558 0.689184063 0.780490525 1.077893097  
YLR405W YLR405W::YLR405W::molecular\_function unknown 1 0.889975501  
0.816004388 0.811699557 0.890057843 1 0.757548506 0.731121259  
0.889215876 0.983864899 1 0.546651311 0.575667023 0.571024723  
0.814944679 1 0.318145318 0.415304254 0.52461342 1  
1.075693984 0.949871451 0.78828104 1.137140707 1 0.962126578  
0.919331181 0.982112189 0.990669503 1.028928045 1 0.728396654  
0.731888229 0.640472962 0.751475576 0.796938732 1 0.848304241  
0.853533049 1.067107232 1.227544448 0.877061186 0.996460122

YLR407W YLR407W::YLR407W::molecular\_function unknown 1 0.948534754  
1.015037684 1.039254868 1.089103674 1 0.927419977 0.920352662  
1.575101653 1.348715793 1 0.680485791 0.663844679 0.831459223  
1.238467363 1 0.411348642 0.435707434 0.838255172 1  
0.908884703 0.871774931 1.231778048 1 0.656243605  
1.05545218 0.995524247 1 0.697622485 0.543304152 0.841885232  
0.704001153 1 0.666217356 0.742577324 0.842691173 0.724341222  
0.78900575 0.618190518  
YGL045W YGL045W::YGL045W::molecular\_function unknown 1 0.948886345  
0.974513566 1.089562645 1.212525033 1 1.055212531 1.251766491  
1.068844061 1 1.091323042 0.935458347 1.132913584 1.325863152 1  
0.900103409 0.543824037 1.143688906 1.204616085 1 1.128060709  
1.743865406 1.684527962 1.49987885 1.116153241 1.131172804  
0.895868844 1 0.972272991 1.327557461 1.520062552 1.222319705  
1.253110891 1 1.031420775 1.131414485 0.551655067 1.785917998  
0.904519585  
YGL047W YGL047W::YGL047W::molecular\_function unknown 1 1.080642727  
1.674337495 1.282701763 1.441012167 1 1.319881822 1.563650665  
1.776714382 1 1.316409413 2.147170086 2.810292881 1.212707565 1  
1.473103697 1.034375089 1.144316031 1.702682072 0.569277654  
1.022052138 0.951060502 0.565309659 1 1.387463212 1.707548135  
1.5211172 0.916654718 1.111569732 1 1.611766743 2.465231956  
2.712602963 1.122649925 1.129882687 1 1.649930556 2.006446818  
1.121898171 1.32755647 1.329936119 1.966651549  
YGL049C YGL049C::TIF4632::also called eIF4 (eIF-4) gamma 1  
0.959180934 0.923339028 0.892711051 0.802841434 1 1.054843578  
0.926312469 0.771301962 0.745276346 1 0.919570564 0.993681702  
0.828658591 1.371875363 0.896859506 1.183496626 1  
1.180208259 1 0.94233123 1.013850184 0.847095705  
0.821738144 0.905938024 1 1.272757606 0.921731486 1.132108766  
1.169211745 0.83665122 1 1.050900678 0.983364127 1.081820395  
1.005704168 1.041045149 0.859862762  
YGL051W YGL051W::YGL051W::molecular\_function unknown 1 1.088191772  
1.038319406 1.035733198 1.293414948 1 1.099820078 1.011282031  
1.240662992 1.189287183 1 1.074959553 1.260196173 1.511228474  
1.208015155 1 1.360968554 0.965958073 1.267146887 1.820368738 1  
1.504620572 1.965752683 2.1896696 1.003614051 1 1.313162876  
1.533151622 1.27478008 1.127939324 1.277116102 1 0.994422846  
1.424946493 1.484116273 1.024059721 1.015203339 1 1.198328925  
1.145794677 0.743636822 1.179572848 1.187120413 1.426391451  
YGL053W YGL053W::PRM8::pheromone-regulated membrane protein 1  
1.077111479 1.115818367 1.003121752 1.204192289 1 1.094295765  
1.003797993 1.033247484 1.223692474 1 1.115282045 1.288058531  
1.776850772 1.259998055 1 1.695504679 1.510881428 1.965171758  
2.482273635 1 1.750425553 2.391237325 3.106018718 1.786502003 1  
1.229763552 1.359364907 1.096498984 1.02758003 1.313721604 1  
1.155670246 1.62609382 2.121025291 1.135324289 1.060236505 1  
1.534412741 1.44678148 0.952659737 1.429040745 1.147347346 1.36597339  
YGL055W YGL055W::OLE1::delta-9-fatty acid desaturase 1 0.913508432  
0.437321126 0.928325601 0.869918184 1 0.95032815 0.662215298  
0.642117936 1.08673246 1 0.509276453 0.568648173 0.266554374  
1.281971402 1 0.475346675 0.198037018 0.2147825 0.707754291 1  
0.304098703 0.082849963 0.087586784 0.395352572 1 0.767405226  
0.704852448 1.445821878 2.811172631 1.37620101 1 0.85636201  
0.797909668 1.028502262 0.991160079 1.253566405 1 0.554790426  
0.562711442 0.288207936 1.852047974 0.200563634 0.630449305

YGL069C YGL069C::YGL069C::molecular\_function unknown 1 1.101606417  
1.160472482 1.440126335 1.57708238 1 1.241931198 1.295915955  
1.590125738 1.5706971 1 0.806546002 1.04495127 1.06128417  
1.01877364 1 0.905251626 0.755991561 0.776334186 1.134427845 1  
1.146026487 0.64035138 0.94598138 1.222372893 1 1.370050938  
1.45437108 1.265006949 1.298542406 1.18044216 1 1.166868265  
1.314320761 0.904672644 0.599690833 1.118636356 1 1.308409226  
1.310357265 0.901653316 1.509102719 1.482466523 1.399247195  
YGL071W YGL071W::RCS1::Involved in iron homeostasis and affects cell size  
regulation 1 0.828294863 0.823261289 0.944057497 1.039218436 1  
0.993492208 1.004567932 0.782477406 0.927368758 1 1.224808347  
1.220322928 0.490647148 0.947200343 1.085214864 0.647116788  
0.774652351 0.816927581 1 1.109318956 0.718681654 0.43442644  
0.940147075 1 1.252879479 1.358982084 1.277673099 0.894997306  
1.145364586 1 0.973681262 1.154205446 0.954053042 1.091308359  
0.786590428 1 0.985839023 1.129992219 0.988580211 0.975861255  
0.729555331 1.235505476  
YGL073W YGL073W::HSF1::heat shock transcription factor 1 0.930659496  
0.966189743 0.841941358 0.978187214 1 0.989069236 1.049285918  
0.861118205 0.850189308 1 1.086158244 0.879906599 0.940835311 1  
0.929520295 0.665401746 0.826127395 0.940066838 1 1.238567686  
1.643887996 1.042914796 0.992538895 1 1.449531006 1.159792707  
1.151644355 1.129993719 1.021478726 1 1.113408608 0.970988868  
1.103463937 0.764577159 0.752144643 1 1.114662657 1.101976934  
0.888042346 1.014541923 0.639831505 1.512202646  
YEL006w YEL006w::YEL006W::molecular\_function unknown 1 1.459616581  
1.191693973 1.339886634 1.013082611 1 1.305901638 1.280859446  
1.134098678 1.12591334 1 1.345407108 1.203487581 0.870866669  
1.122730097 1 0.717166486 1.038436987  
0.821707953 0.646693181 0.747716361  
2.196580021 1 0.987150111 1.028865027  
YEL006w YEL006w::YEL006W::molecular\_function unknown  
1 1.141689281  
1.232823402 1.363732789 1.197027907 1.171462594 1 0.907742587  
0.823781935 0.737951951 0.725908925 0.580147662 1 1.070357063  
0.896861832 1.112044465 0.887028023 0.801008998 1.143564939  
YGL075C "YGL075C::MPS2::Monopolar spindle two, encodes a membrane protein  
localized at the nuclear envelope and the spindle pole body throughout the cell  
cycle. The protein is approximately 45 kDa, and contains a coiled-coil motif and  
a hydrophobic domain." 1 0.827088239 1.019965756 1.212868721 1.182704889 1  
1.062683546 1.037309584 1.15163823 1 0.905837896 0.954696971  
0.951251446 1.253848629 0.496071621 0.51547894 0.884394761  
0.602380953 1 0.655388209 0.888912651 0.872882563 1  
0.868071452 0.809304768 1 1.120044775 0.922144407  
1.014741903 0.910849667 0.748276294 1 1.154261551 0.949582445  
1.180183224 0.910589943 1.160303073 0.870370271  
YEL008w YEL008w::YEL008W::molecular\_function unknown 1  
1.278236956 1.044295832 1.09294253 1 1  
1.395795403  
1 1.136761677 1.233522676 0.750036631  
0.868956548 0.916974711 0.955837434 0.79244515  
1.54149 0.86114602 1.599765067  
YEL010w YEL010w::YEL010W::molecular\_function unknown  
0.982547597 1.357873623  
1 1.975974503 4.015070957 1

|         |                                                                                            |             |             |             |             |             |
|---------|--------------------------------------------------------------------------------------------|-------------|-------------|-------------|-------------|-------------|
|         | 1.246442809                                                                                |             | 1.124339375 | 0.976475842 |             | 0.799586088 |
|         | 1                                                                                          |             | 0.745605541 | 0.548140614 |             | 1.366849055 |
| YEL012w | YEL012w::UBC8::Ubiquitin-conjugating enzyme that is able to ubiquitinate histones in vitro |             |             |             |             |             |
|         | 1                                                                                          |             | 1.674779249 | 1.249797107 |             |             |
|         | 1.850608794                                                                                | 1           | 1.144358955 | 1.219168496 | 1.614869734 | 1.404171172 |
|         | 1.70743929                                                                                 | 2.157324385 | 3.082813245 | 1.646710295 | 1           | 2.395627438 |
|         | 1.993811901                                                                                | 1.70849291  | 2.277566079 | 1           | 5.038077229 | 6.571520006 |
|         | 5.909080991                                                                                | 2.221969238 | 1           | 1.495137873 | 2.680953897 | 1.1053247   |
|         | 0.576413748                                                                                | 1.196393759 | 1           | 1.982410888 | 4.142398862 | 5.613483672 |
|         | 3.367367197                                                                                | 2.711464859 | 1           | 2.121114127 | 1.37848208  | 1.331438272 |
|         | 2.29560719                                                                                 |             |             |             |             |             |
| YLR409C | YLR409C::UTP21::Protein required for cell viability                                        |             |             |             |             |             |
|         | 1                                                                                          |             |             |             |             |             |
|         | 0.902156156                                                                                | 0.695190364 | 1.082251688 | 0.600640412 | 1           | 0.991070781 |
|         | 0.787781116                                                                                | 0.971829544 | 0.873315633 | 1           | 0.623108462 | 0.570393688 |
|         | 0.375209448                                                                                | 0.968012792 | 1           | 0.391594383 | 1.135378635 | 0.855156002 |
|         | 0.342466682                                                                                | 1           | 0.548263032 | 0.386334733 | 0.175771163 | 0.425254821 |
|         | 1.343956514                                                                                | 1.34203625  | 1.272909702 | 1.521589925 | 1.649192419 | 1           |
|         | 0.904803773                                                                                | 0.329195538 | 0.612165549 | 1.179225446 | 0.308590798 | 1           |
|         | 0.440486235                                                                                | 0.353198935 | 0.404207282 | 0.236128407 | 0.371480701 | 0.361632701 |
| YEL025c | YEL025c::SRI1::Swi/SNF and RSC interacting protein                                         |             |             |             |             |             |
|         | 1                                                                                          |             |             |             |             |             |
|         | 1.051445111                                                                                | 0.865144133 | 1.070758035 | 1           | 1.16626319  | 1.159499424 |
|         | 0.90791008                                                                                 | 0.718215292 | 1           | 1.237490138 | 1.049776751 | 0.48462412  |
|         | 1.032540245                                                                                | 1.538473545 |             | 1.128625421 | 1           | 1.244575574 |
|         | 0.897815289                                                                                |             |             | 0.935834012 | 1.274021124 | 1.402946111 |
|         | 1.348232685                                                                                | 1           | 0.878016376 | 0.425122867 | 0.684433947 | 0.882158753 |
|         | 0.390832463                                                                                | 1           | 0.684244551 | 0.437665719 | 0.975009572 | 0.513174344 |
|         | 0.771465002                                                                                | 0.575284973 |             |             |             |             |
| YLR411W | YLR411W::CTR3::integral membrane protein that functions in high affinity copper transport  |             |             |             |             |             |
|         | 0.945628424                                                                                | 0.967995327 |             |             |             | 1.106234965 |
|         | 0.813609205                                                                                | 0.817196227 | 1.094059978 |             | 0.947626768 | 0.973099658 |
|         | 1.219982939                                                                                | 1.220799262 | 1           | 0.901288499 | 0.80883535  | 0.794011211 |
|         | 1.190132197                                                                                | 1           | 1.249866592 | 2.042117976 | 1.826903447 | 1.325521593 |
|         | 1.014900853                                                                                | 0.934354374 | 0.939488673 | 0.912403031 | 1.175367754 | 1           |
|         | 0.954150529                                                                                | 1.309528123 | 1.0368779   | 1.004615841 | 1           | 0.909354712 |
|         | 0.879039878                                                                                | 1.025784221 | 1.456083431 |             |             |             |
| YEL027w | YEL027w::CUP5::vacuolar ATPase V0 domain subunit c (17 kDa)                                |             |             |             |             |             |
|         | 1                                                                                          |             |             |             |             |             |
|         | 2.338160814                                                                                | 1.723837701 | 1.286909555 | 2.600742057 | 1           | 1.319613421 |
|         | 1.146032934                                                                                | 1.916304305 | 1.714423181 | 1           | 1.265676903 | 1.269993353 |
|         | 1.564406612                                                                                | 1.313755215 |             | 0.613341825 | 0.423209454 | 0.617570045 |
|         | 0.766041517                                                                                | 1           | 1.560820248 | 1.655244025 | 1.484687969 | 1.180542027 |
|         | 1.452073329                                                                                | 1.342677118 | 0.951533019 | 1.577699339 | 1.172864277 | 1           |
|         | 1.00526091                                                                                 | 1.29828263  | 0.948642344 | 0.489994389 | 1.053624997 | 1           |
|         | 1.078249625                                                                                | 1.272830572 | 0.766174875 | 1.839395248 | 1.057143532 | 1.840561646 |
| YLR413W | YLR413W::YLR413W::molecular_function unknown                                               |             |             |             |             |             |
|         | 1                                                                                          |             |             |             |             |             |
|         | 0.433620432                                                                                | 0.752841243 | 0.467249038 | 1           | 0.76355558  | 0.721322332 |
|         | 0.492319888                                                                                | 1           | 0.87956899  | 0.416519733 | 0.238735376 | 0.601175096 |
|         | 0.36021972                                                                                 |             | 0.171206095 | 0.133873873 | 1           | 0.056526875 |
|         | 0.078964901                                                                                | 0.126369765 | 1           | 1.074519541 |             | 1.676086416 |
|         | 0.626463173                                                                                | 1           | 1.004663804 | 0.673493312 | 0.877121456 | 0.65045232  |
|         | 0.402928013                                                                                | 1           | 0.794034951 | 0.790286852 | 0.708745291 | 0.564195945 |
|         | 0.195340847                                                                                | 0.523623143 |             |             |             |             |
| YEL029c | YEL029c::BUD16                                                                             |             |             |             |             |             |
|         | 1                                                                                          |             |             |             |             |             |
|         | 1.094069066                                                                                | 1           | 0.95211794  | 0.908804961 | 1.185445078 | 1.115056149 |
|         | 1.034302243                                                                                | 0.940767715 | 0.767848982 | 1.082769765 | 1           | 0.548784746 |
|         | 0.376730737                                                                                | 0.370355356 | 0.931894528 | 1           | 1.367431635 | 1.174722567 |
|         | 1.310376543                                                                                | 1           | 1.050750796 | 0.916322204 | 0.998419474 | 0.954400605 |

0.897940607 0.872897783 0.784148465 0.74986854 0.905995947 1  
 1.002625842 0.812524266 0.877835593 1.18856021 0.884350082 0.974569543  
 YLR415C YLR415C::YLR415C::molecular\_function unknown 1  
 1.296094363 1.212553688 1 1.37161467 1.479445278  
 1.347073361 1 1.357973749 1.521307137 1.182008936 1.542236271 1  
 2.048682175 0.803063391 1 0.676392961 0.525559722 1  
 1.053110046 1.019886832 1.043586913 1.496556041 1.204153526 1  
 0.860270766 0.686207588 0.908135526 0.944562068 1 0.658115919  
 0.82170329 0.82975266 0.61952636 0.854074293 0.414170143  
 YEL031w YEL031w::SPF1::Sensitivity to a killer toxin (SMK toxin) produced by  
 Pichia Farinosa 1 1.58624109 1.317538684 1  
 1.496014678 1.230608491 1 1.380762957 1.5727065 1.439503701  
  
 1.195215626 0.909985248 1 1  
 1.195172504 0.804698482  
 YLR429W "YLR429W::CRN1::coronin, an actin-binding protein originally  
 identified in Dictyostelium" 1 0.66719512 0.777428288 0.950528728  
 0.603486453 1 0.838497085 0.889423511 0.936782162 0.779829225 1  
 0.750553485 0.891108669 0.622536536 0.938775874 1 0.695828986  
 0.704523613 0.614398546 0.84146526 1 1.355978594 0.84737196  
 0.991370762 1.295373384 1 0.964370863 1.068972218 1.015901652  
 1.010681969 1.015997887 1 0.983297566 0.883437535 1.062576116  
 0.897236084 0.716436154 1 1.079330338 0.968126258 1.035288831  
 0.764596738 1.078225294 0.996460122  
 YEL033w YEL033w::YEL033W::molecular\_function unknown 1 1.383107125  
 1.581023885 0.768964601 1.547111175 1 0.879397179 0.79661765  
 1.495460352 1.193731294 1 0.834303932 0.832943191 1.79032249  
 0.716328115 1 1.09165064 0.835010332 1.20473796 1.260375616 1  
 0.73350567 1.782956186 1.123395684 0.596436062 1 0.468122943  
 0.361610531 0.239662237 0.50310497 0.530807509 1 0.6087741  
 0.736026315 0.288086343 0.543417449 1.862228063 1 0.715096394  
 0.829669979 0.979968951 2.927942488 1.240051961 1.20660989  
 YLR431C YLR431C::YLR431C::molecular\_function unknown 1  
 1 1 1.609609413 1  
 0.699988935 0.40957517 0.701874498 1.241971742 1 1.836259077  
 5.135725347 3.983559012 1.506713604 1 0.939442097 1.132605551  
 0.917176939 0.855816072 1.014613104 1 1.447091247 1.690404424  
 1 1.306324494 1.782150406 1.000838238  
 YEL035c YEL035c::UTR5::Product of gene unknown 1.096681733  
 1.110333239  
 1.113110458 1 1.698816419 1.579156639 0.79279772  
 1 1.030664869 1.101067041  
 0.791984402 1.045714631 0.986385665  
 1.140938049  
 YLR433C YLR433C::CNA1::calmodulin binding protein homologous to mammalian  
 calcineurin 1 1.695618802 1.571680694 1.731869878 1.234097264 1  
 1.723365933 1.842455527 1.445338184 1 1.593661369 1.49134971  
 1.041994897 1.782458897 1 0.733216006 0.464425165 0.675097589  
 0.741682322 1 0.812631875 0.57509777 0.591886938 0.558177422 1  
 0.759994756 0.843034214 0.955585049 1.110642312 0.80647489 1  
 0.848374136 0.524507207 0.696275612 0.893080974 0.671160948 1  
 0.890590597 0.88937493 0.599703495 0.929721648 0.649712994  
 YLR435W YLR435W::YLR435W::molecular\_function unknown 1 0.889168548  
 0.942347216 0.831868578 1.333094626 1 0.723814513 0.718146073  
 1.139141525 1.212213865 1 0.733352762 0.652413561 0.7296579  
 1.010757297 1 0.371123903 0.399399984 0.43945928 0.708554544 1  
 0.688597122 1.335557927 0.670681976 0.645093585 1 0.75340064

|         |                                                                                                                  |             |             |             |             |             |
|---------|------------------------------------------------------------------------------------------------------------------|-------------|-------------|-------------|-------------|-------------|
|         | 0.727279313                                                                                                      | 0.525486974 | 0.748962151 | 0.828247434 | 1           | 0.984638764 |
|         | 1.04620717                                                                                                       | 0.693481368 | 2.420139834 | 1           | 0.881293803 | 0.909618136 |
|         | 0.914786915                                                                                                      | 1.47972082  | 0.712174419 |             |             |             |
| YLR437C | YLR437C::YLR437C::molecular_function                                                                             | unknown     |             | 1           | 1.185096868 |             |
|         | 1.157934037                                                                                                      | 0.8797699   | 0.975598035 | 1           | 0.964215997 | 0.8957943   |
|         | 1.120097878                                                                                                      | 1.050073317 | 1           | 1.205331473 | 1.032678063 | 1.424573492 |
|         | 1.025649696                                                                                                      | 1           | 1.160407336 | 1.064239725 | 1.080546419 | 1.070284838 |
|         | 1.233069239                                                                                                      | 1.683190004 | 1.462750114 | 0.980126293 | 1           | 0.853920986 |
|         | 0.715603958                                                                                                      | 0.832828519 | 0.968522609 | 0.883977423 | 1           | 0.932925621 |
|         | 0.854178838                                                                                                      | 0.858910066 | 0.699468791 | 1.296474441 | 1           | 1.262422389 |
|         | 1.116611512                                                                                                      | 1.244032352 | 1.290115057 | 1.169087556 | 1.125176811 |             |
| YLR439W | YLR439W::MRPL4::essential for mitochondrial function and for proper cell growth under non-respiratory conditions |             |             | 1           | 0.672190878 | 0.810015981 |
|         | 0.495969757                                                                                                      | 0.514530876 | 1           | 0.74835465  | 0.881434139 | 0.705082859 |
|         | 0.604871819                                                                                                      | 1           | 0.9247818   | 0.901547533 | 1.169319167 | 0.549871949 |
|         | 0.795540471                                                                                                      | 0.835972444 | 0.732244319 | 1.012897876 | 1           | 0.86791933  |
|         | 2.0485623                                                                                                        | 1.65220519  | 1.616512532 | 1           | 0.983834715 | 0.686425229 |
|         | 0.88774248                                                                                                       | 0.855944327 | 0.93852006  | 1           | 1.077890553 | 1.053489085 |
|         | 0.947481541                                                                                                      | 0.798729281 | 1.23831818  | 1           | 0.766987202 | 0.750479208 |
|         | 0.573340607                                                                                                      | 1.422070329 |             |             |             |             |
| YGL077C | YGL077C::HNM1::choline transport protein; may also control uptake of nitrogen mustard                            |             |             | 1           | 1.308908297 | 0.734881026 |
|         | 1.291973165                                                                                                      | 1.175659034 | 0.743020173 | 0.927432359 | 1           | 0.771137267 |
|         | 0.59916229                                                                                                       | 0.46061406  | 0.634925668 | 1           | 0.697474202 | 0.384790988 |
|         | 0.588310051                                                                                                      | 0.450459626 | 1           | 0.39909017  | 0.183846081 | 0.185344938 |
|         | 0.379020479                                                                                                      | 1           | 0.678103159 | 0.508409551 | 0.52595576  | 1.392635192 |
|         | 0.971046588                                                                                                      | 1           | 0.312205419 | 0.203449121 | 0.261422159 | 0.317076672 |
|         | 0.2718129                                                                                                        | 1           | 0.429314743 | 0.244035931 | 0.569914826 | 0.587742125 |
|         | 0.701284395                                                                                                      | 0.900141469 |             |             |             |             |
| YGL079W | YGL079W::YGL079W::molecular_function                                                                             | unknown     |             | 1           | 1.829026167 |             |
|         | 1.26264334                                                                                                       | 1.133290239 | 1.99364385  | 1           | 1.162198925 | 1.082334752 |
|         | 1.45128335                                                                                                       | 1.732549173 | 1           | 0.97703374  | 1.146793365 | 1.468685241 |
|         | 1.19584685                                                                                                       | 1.180588856 | 1.01860818  | 1.665215548 | 1           | 1.063678511 |
|         | 1.511333287                                                                                                      | 1.298480425 | 1           | 1.095781282 | 1.072240223 | 0.71241638  |
|         | 0.75509526                                                                                                       | 0.99543104  | 1           | 0.909830002 | 1.218378832 | 1.183908721 |
|         | 1.022203621                                                                                                      | 1.462136788 | 1           | 1.171934611 | 1.423174841 | 0.903474887 |
|         | 1.654596399                                                                                                      | 1.154306981 | 3.609322318 |             |             |             |
| YGL093W | YGL093W::SPC105::Spindle Pole Component of molecular weight 105kDa                                               |             |             | 1           | 1.182477304 | 1.485111652 |
|         | 1.493952674                                                                                                      | 1.186253823 | 1           | 1.264552599 | 1.58531556  | 1.063630824 |
|         | 1.519308917                                                                                                      | 1           | 0.997197584 | 0.783749692 | 1           | 0.810419494 |
|         | 0.831059926                                                                                                      | 0.539300201 | 0.595842061 | 1           | 1.004298486 | 1.128270561 |
|         | 0.881840268                                                                                                      | 0.890898363 | 1.023173992 | 1           | 1.02068695  | 0.848067364 |
|         | 1.010352472                                                                                                      | 0.767206825 | 0.638967285 | 1           | 1.218325819 | 1.080539366 |
|         | 1.219169156                                                                                                      | 1.136528117 | 1.046971731 |             |             |             |
| YGL095C | YGL095C::VPS45::Protein of the Sec1p family essential for vacuolar protein sorting                               |             |             | 1           | 1.294403844 | 1.461281847 |
|         | 1.444992116                                                                                                      | 1.254872036 | 1.325303046 | 1.287215527 | 1           | 1.202198138 |
|         | 1.597591091                                                                                                      | 1.008066192 | 1.399977749 | 1           | 0.959466598 | 0.835580425 |
|         | 0.736228739                                                                                                      | 1           | 1.121322142 | 1.162001496 | 1.462607871 | 1           |
|         | 1.112981017                                                                                                      | 1.309974042 | 1.149693327 | 1.020091608 | 1.282963152 | 1           |
|         | 1.082409707                                                                                                      | 1.22238515  | 1.299403016 | 1.229888578 | 1.072955234 | 1           |
|         | 1.041643575                                                                                                      | 0.971983779 | 1.007736037 | 0.921914241 | 1.104344383 | 1.400998421 |
| YGL097W | YGL097W::SRM1::Gdp/GTP exchange factor for Gsp1p/Gsp2p                                                           |             |             | 1           |             |             |
|         | 1.008155173                                                                                                      | 0.869362831 | 1.164384995 | 0.876492553 | 1           | 1.105939593 |
|         | 1.027653394                                                                                                      | 0.954097767 | 1.134284046 | 1           | 0.869371366 | 0.805320585 |
|         | 0.628451862                                                                                                      | 1.174267655 | 1           | 1.008004737 | 0.523682426 | 0.756341924 |



0.89399254 1 0.894442159 0.602276032 0.551051445 0.631067161 1  
0.925944401 0.835560316 0.838361424 1.011966817 0.817287927 1  
0.941907831 0.731824261 0.674895986 0.741344752 0.546732255 1  
0.854722571 0.671426037 0.747715389 0.648462608 0.609280472 1.019226366  
YGL099W YGL099W::LSG1::Killer toxin REsistant 1 0.877138338  
0.7264818 0.842242526 0.798858264 1 0.945560588 0.788873731  
0.755299755 0.786789675 1 0.694305703 0.535781774 0.36420012  
0.796730899 1 0.540811817 0.394061341 0.48600543 1  
0.755425175 0.509168603 0.243154234 0.836522605 1 0.909910644  
0.753790149 0.840222939 1.059604801 0.857181262 1 1.000651284  
0.694512274 0.658576179 0.806932531 0.885224881 1 0.79118626  
0.680718978 0.896750764 0.987927804 0.510749338 0.940420177  
YGL101W YGL101W::YGL101W::molecular\_function unknown 1 1.263237144  
1.324954175 1.093284488 1.7015646 1 1.182385053 1.084286413  
1.293962432 1.311947807 1 0.889786395 1.055330523 0.851444364  
0.823762814 1 1.118164964 0.676226558 0.664251083 0.7896966  
0.989541978 0.801763032 0.528232299 0.651193241 1 0.847153845  
0.937861442 0.85125478 0.983274563 0.927979625 1 0.633908192  
0.529281344 0.40977879 0.565526118 0.922062358 1 0.710448136  
0.665943648 0.932890071 1.341137141 1.433157442 1.45003336  
YGL103W "YGL103W::RPL28::Homology to rat, mouse L27a. May be involved in  
peptidyl transferase activity." 1 0.936531149 0.853043267 0.815700682  
1.209129731 1 0.967153565 0.787618841 1.044292404 0.996364281 1  
0.626700125 0.702068097 0.512943285 0.726362544 1 0.866752852  
0.444910283 0.267450507 0.607997727 1 1.413182997 0.648858075  
0.443123661 0.962888141 1 1.181193481 1.028194752 1.022684191  
1.243316886 1.238414302 1 1.054492127 1.344322775 0.949750396  
0.70649169 1.384264588 1 1.272923997 1.366435621 1.140587126  
1.887848091 1.229797153 1.660183128  
YGL117W YGL117W::YGL117W::molecular\_function unknown 1 2.044673655  
1.847077999 0.900222942 0.83979804 1 1.299681401 1.045211703  
0.962710826 0.782643539 1 5.093483197 2.313001833 0.598452285  
0.565613246 1 2.580025245 1.373012909 0.672745371 0.690566346 1  
2.834553071 1.814361345 0.666742112 0.982410979 1 1.254013352  
1.15791858 1.059207908 0.95758711 1.243270018 1 1.786340788  
1.268121485 1.767080068 1.251117656 1.352641357 1 2.648769417  
1.439739911 2.136049948 1.66795564 1.475695922 1.238132366  
YEL049w YEL049w::PAU2::member of the seripauperin protein/gene family (see  
Gene\_class PAU) 1 1.276499197 1.408711923 1.093339837 1.451733812 1  
1.092938283 1.08533679 1.4516799 1.452386103 1 1.29606336  
1.361349131 2.142452462 1.298946336 1 1.595750668 1.319213841  
1.727464123 1.656124882 1 1.286247609 2.141500746 1.596393153  
0.760719788 1 1.112981017 1.345877883 1.07537422 1.014212782 1  
1.06817154 1.632322709 1.280627991 1.373552241 1.672181229 1  
1.000649673 1.2972697 1.322726645 1.609384141 1.23117905 1.608521299  
YGL119W "YGL119W::ABC1::multicopy suppressor of a cytochrome b mRNA  
translation defect, essential for the electron transfer in the bc1 complex" 1  
0.9842955 1.002835445 1.152228717 1.120899346 1 1.153115134  
1.137578752 1.040779971 1 1.007709329 1.009587116 0.682371816  
1.03430549 1 0.609078233 0.313780198 0.298240411 0.484400372 1  
1.206887259 0.712277399 0.507711707 0.8859221 1 0.984872162  
1.103444964 1.225581895 1.062585164 1 1.09301743 1.004272449  
1.052053471 0.912150995 1.002911064 1 1.069432497 1.031464414  
0.859865024  
YEL051w YEL051w::VMA8::vacuolar ATPase V1 domain subunit D 1  
0.883944148 1.063574051 0.930813559 1.495328497 1 0.888999012  
0.898781889 1.312607283 1.263955179 1 0.795810742 1.042069957

|             |                                                                                                                                                                           |             |             |             |               |
|-------------|---------------------------------------------------------------------------------------------------------------------------------------------------------------------------|-------------|-------------|-------------|---------------|
| 1.083706869 | 1.100157001                                                                                                                                                               | 1           | 1.44367488  | 1.051574572 | 0.876134694   |
| 1.476772288 | 1                                                                                                                                                                         | 2.043385348 | 1.624143209 | 1.834252239 | 1.311368139   |
| 0.830463392 | 1.021623473                                                                                                                                                               | 0.802360044 | 0.814747733 | 1.041782276 | 1             |
| 1.086487777 | 1.494011134                                                                                                                                                               | 1.129944902 | 0.970006469 | 1.431076096 | 1             |
| 1.415054313 | 1.531347952                                                                                                                                                               | 1.13417216  | 1.560779431 | 1.198173526 | 1.619028756   |
| YEL053c     | YEL053c::MAK10::Glucose-repressible protein                                                                                                                               |             |             |             | 1 0.94260836  |
| 0.822170957 | 0.869642679                                                                                                                                                               | 0.774200943 | 1           | 0.896255289 | 0.854271146   |
| 0.963502477 | 0.750831849                                                                                                                                                               | 1           | 1.081701985 | 0.738719336 | 0.439145035   |
| 1.008957262 | 1                                                                                                                                                                         | 1.089436897 | 0.74573623  | 0.761999736 | 1             |
| 0.962261747 | 0.643082422                                                                                                                                                               | 0.506495018 | 0.573297388 | 1           | 1.021557352   |
| 0.883490921 | 0.966537011                                                                                                                                                               | 1.0374552   | 0.985656223 | 1           | 0.931702866   |
| 0.878933537 | 0.63440667                                                                                                                                                                | 0.938256838 | 0.8256159   | 0.98060616  |               |
| 0.831721215 | 0.955104965                                                                                                                                                               | 0.786159885 | 0.871733885 | 0.976320768 |               |
| YEL055c     | YEL055c::POL5::DNA polymerase V that has motifs typical of DNA polymerase family. Aphidicolin-sensitive; stimulated by yeast proliferating cell nuclear antigen (PCNA). 1 |             |             |             |               |
|             | 1.54757398                                                                                                                                                                | 1.375606265 | 1.339367382 | 1.444676683 | 1             |
|             | 1.192346898                                                                                                                                                               | 1.191611647 | 1           | 1.183227834 |               |
|             | 1.742104212                                                                                                                                                               | 1           | 0.597187914 |             |               |
|             | 1                                                                                                                                                                         | 0.892470254 | 0.874046517 | 0.793517425 | 1.07912917    |
|             | 0.862269572                                                                                                                                                               | 1           | 0.874808438 | 0.583710855 | 0.533866788   |
|             | 0.823572327                                                                                                                                                               | 0.712866079 | 1           | 0.903587879 | 0.779127742   |
|             | 0.893219434                                                                                                                                                               | 0.931364993 | 0.625658829 | 0.950052073 |               |
| YEL057c     | YEL057c::YEL057C::molecular_function unknown                                                                                                                              |             |             |             | 1             |
| 2.038592285 | 1.265187783                                                                                                                                                               | 2.083361578 | 1           | 1.333438548 | 1.310805269   |
| 1.780982615 | 1.28005423                                                                                                                                                                | 1           | 1.36226536  | 1.285775613 | 2.310671736   |
| 1.373399941 | 1                                                                                                                                                                         | 0.862159148 | 1.25331789  | 1.303819959 | 1             |
| 1.060699875 | 3.737813827                                                                                                                                                               | 2.437982672 | 2.029640669 | 1           | 0.880695676   |
| 0.521497944 | 0.722073132                                                                                                                                                               | 0.859809656 | 1           | 1.249036415 |               |
| 1.750801662 | 1                                                                                                                                                                         | 0.766807943 | 1.182445779 | 1.109656565 | 1.21010278    |
| 1.092908092 | 0.863365265                                                                                                                                                               |             |             |             |               |
| YEL059w     | YEL059w::YEL059W::molecular_function unknown                                                                                                                              |             |             |             | 1 1.256142467 |
| 1.312632674 | 1.523400469                                                                                                                                                               | 1.26702766  | 1           | 1.276446611 | 1.313554977   |
| 1.596705631 | 1.413512598                                                                                                                                                               | 1           | 1.358025587 | 1.300985159 | 1.426237519   |
| 0.620787568 | 0.805853608                                                                                                                                                               | 1           | 1.367867912 | 2.162427821 |               |
| 1.476914871 | 0.963339316                                                                                                                                                               | 1           | 1.156071356 | 0.8595424   | 1.161356291   |
| 1.165205392 | 1.129210038                                                                                                                                                               | 1           | 0.789632244 | 0.705615673 | 0.880444533   |
| 1.154197729 | 1                                                                                                                                                                         | 0.908101869 | 0.906268798 | 0.60361523  | 1.198382711   |
| 0.42790781  | 0.895763354                                                                                                                                                               |             |             |             |               |
| YEL073c     | YEL073c::YEL073C::molecular_function unknown                                                                                                                              |             |             |             | 1 1.625331885 |
| 1.587467456 | 1.519039463                                                                                                                                                               | 1.767252125 | 1           | 1.639220618 | 1.548019596   |
| 1.530582428 | 1                                                                                                                                                                         | 1.325912646 | 1.658514252 | 1.785528776 | 1.040468278   |
| 1.664444975 | 1.385567519                                                                                                                                                               | 1.413682568 | 1.984308038 | 1           | 1.474799146   |
| 2.636373884 | 1.852546416                                                                                                                                                               | 1           | 1.219853466 | 1.398219432 | 1.156026486   |
| 1.230821961 | 1                                                                                                                                                                         | 0.929163892 | 1.082381798 | 1.687993138 | 1.29584296    |
| 1.849172913 | 1                                                                                                                                                                         | 0.968574787 | 1.240442456 | 1.143685884 |               |
| 1.179465531 |                                                                                                                                                                           |             |             |             |               |
| YEL075c     | YEL075c::YEL075C::molecular_function unknown                                                                                                                              |             |             |             | 1 1.025444175 |
| 0.823716252 | 1.064113285                                                                                                                                                               | 0.625817418 | 1           | 1.36704232  | 1.321316908   |
| 0.689530527 | 0.686874379                                                                                                                                                               | 1           | 1.051160196 | 0.949135477 | 0.460314793   |
| 0.906747288 | 1                                                                                                                                                                         | 0.558313399 | 0.368206504 | 0.473209737 | 1             |
| 0.443352716 | 0.384756252                                                                                                                                                               | 0.483486558 | 1           | 0.86465652  | 0.960872139   |
| 1.005612508 | 1.148341274                                                                                                                                                               | 1.049418469 | 1           | 0.757530099 | 0.465171475   |
| 1.050076881 | 0.563974745                                                                                                                                                               | 1           | 0.640843634 | 0.566081916 | 0.769745603   |
| 0.610824239 | 0.671152352                                                                                                                                                               | 0.770549116 |             |             |               |
| YEL077c     | YEL077c::YEL077C::molecular_function unknown                                                                                                                              |             |             |             | 1 0.789708546 |
| 0.711047935 | 0.935260866                                                                                                                                                               | 0.483207007 | 1           | 1.052062984 | 1.073744789   |
| 0.63441313  | 0.645442204                                                                                                                                                               | 1           | 0.921134725 | 0.879244863 | 0.5474322     |
| 0.81669438  | 1                                                                                                                                                                         | 0.921687217 | 0.762876638 | 0.9260616   | 0.688012862   |
|             |                                                                                                                                                                           |             |             |             | 1             |

|             |                                                                                                                                                                                                                                      |             |             |             |             |             |
|-------------|--------------------------------------------------------------------------------------------------------------------------------------------------------------------------------------------------------------------------------------|-------------|-------------|-------------|-------------|-------------|
| 0.62541029  | 0.391564702                                                                                                                                                                                                                          | 0.385587987 | 0.90053728  | 1           | 0.837330443 |             |
| 0.916316961 | 1.075057413                                                                                                                                                                                                                          | 1.162374424 | 1.192632928 | 1           | 0.800386366 |             |
| 0.665082425 | 0.777942667                                                                                                                                                                                                                          | 0.933372216 | 0.490630088 | 1           | 0.643735793 |             |
| 0.681904514 | 0.930101468                                                                                                                                                                                                                          | 0.90237011  | 0.880607296 | 0.636578646 |             |             |
| YER002w     | YER002w::NOP16::Nucleolar protein 16                                                                                                                                                                                                 |             |             | 1           | 0.776833356 |             |
| 0.902578255 | 0.729427524                                                                                                                                                                                                                          | 1.208642546 | 1           | 0.7219249   | 0.654030122 |             |
| 1.016247333 | 1.072943475                                                                                                                                                                                                                          | 1           | 0.508092509 | 0.565264401 | 0.674618774 |             |
| 0.771060259 | 1                                                                                                                                                                                                                                    | 0.500765719 | 0.359335273 | 0.425302729 | 0.90306631  | 1           |
| 0.909141112 | 0.773656148                                                                                                                                                                                                                          | 0.784265578 | 0.857990988 | 1           | 0.602271577 |             |
| 0.607004869 | 0.415109537                                                                                                                                                                                                                          | 0.350747966 | 0.788078453 | 1           | 1.102047544 |             |
| 1.225689669 | 0.780304321                                                                                                                                                                                                                          | 1.345400235 | 2.104073458 | 1           | 1.180611162 |             |
| 1.214213717 | 1.10757775                                                                                                                                                                                                                           | 1.751576154 | 0.902444276 | 1.236381036 |             |             |
| YGL121C     | "YGL121C::GPG1::G protein gamma. Gpg1 interacts with Gpa2, Gpb1 (YOR371c), and Gpb2 (YAL056w) in yeast two hybrid assays. The interaction between Gpa2 and Gpg1 is indirect and requires Gpb1 OR Gpb2."                              |             |             | 1           |             |             |
| 1.357002151 | 2.066495403                                                                                                                                                                                                                          | 1.957372891 | 3.249828991 | 1           | 1.237418339 |             |
| 1.717600845 | 3.298847071                                                                                                                                                                                                                          | 3.779182422 | 1           |             | 4.8459114   |             |
| 4.260916146 | 1                                                                                                                                                                                                                                    | 1.757638313 | 2.329278424 | 3.14672643  | 7.165675353 | 1           |
| 2.073105043 | 3.899347358                                                                                                                                                                                                                          | 6.311400853 | 4.744467006 | 1           | 1.103503052 |             |
| 1.101519446 |                                                                                                                                                                                                                                      | 1.131720798 | 0.902008418 | 1           | 0.978067223 | 1.220476838 |
| 0.940564851 | 1.07607661                                                                                                                                                                                                                           | 1.738429599 | 1           | 0.974348749 | 1.405515749 |             |
| 1.14819872  | 2.053034739                                                                                                                                                                                                                          | 1.221880539 | 1.619904421 |             |             |             |
| YGL123W     | YGL123W::RPS2::Homology to rat S2 and E. coli S5                                                                                                                                                                                     |             |             | 1           |             |             |
| 1.225367855 | 0.90971043                                                                                                                                                                                                                           | 0.77695244  | 0.920330381 | 1           | 0.937030876 |             |
| 0.821778296 | 0.890062026                                                                                                                                                                                                                          | 0.97874903  | 1           | 0.790606314 | 0.698308689 |             |
| 0.543055356 | 0.713314127                                                                                                                                                                                                                          | 1           | 0.753761682 | 0.428592415 | 0.244494182 |             |
| 0.652595119 | 1                                                                                                                                                                                                                                    | 1.060687142 | 0.701406944 | 0.423765473 | 0.651858589 | 1           |
| 1.259825286 | 0.992910266                                                                                                                                                                                                                          | 1.283803947 | 1.403276592 | 1.326571453 | 1           |             |
| 1.124981412 | 1.00158319                                                                                                                                                                                                                           | 0.607577156 | 0.426631504 | 0.561395291 | 1           |             |
| 1.288963501 | 0.778675695                                                                                                                                                                                                                          | 1.053491033 | 1.093027674 | 0.927316938 | 1.581376939 |             |
| YGL125W     | YGL125W::MET13::putative methylenetetrahydrofolate reductase (mthfr)                                                                                                                                                                 |             |             |             |             |             |
| 1           | 1.636468672                                                                                                                                                                                                                          | 1.325464397 | 1.248810035 | 0.752829072 | 1           | 1.529680292 |
| 1.513896067 | 0.824695653                                                                                                                                                                                                                          | 0.909442098 | 1           | 2.40025995  | 1.677681875 |             |
| 0.988108995 | 0.73035547                                                                                                                                                                                                                           | 1           | 0.908876652 | 0.694049569 | 0.908148529 |             |
| 0.503727516 | 1                                                                                                                                                                                                                                    | 0.451694424 | 0.463347399 | 0.30374132  | 0.333118419 | 1           |
| 0.849251411 | 0.824434709                                                                                                                                                                                                                          | 0.753686039 |             | 0.895137518 | 1           | 0.817610088 |
| 0.607696685 | 0.591667687                                                                                                                                                                                                                          | 0.823633835 | 0.729225396 | 1           | 0.848053561 |             |
| 0.526490697 | 0.811837931                                                                                                                                                                                                                          | 0.765446897 | 0.654765794 | 1.731108646 |             |             |
| YGL127C     | "YGL127C::SOH1::Soh1p has limited sequence similarity to RNA polymerases and interacts with a DNA repair protein, Rad5p, in a two-hybrid system assay; may provide a link between recombination in direct repeats and transcription" |             |             | 1           |             |             |
| 1.384998451 | 1.23727413                                                                                                                                                                                                                           | 1.421085369 | 1.626815314 | 1           | 1.300108273 |             |
| 1.290113676 | 2.108176332                                                                                                                                                                                                                          | 1.399522395 | 1           | 0.915053614 | 0.811947145 |             |
| 0.751713395 | 0.86020074                                                                                                                                                                                                                           | 1           | 0.915093388 | 0.858445175 | 0.835550136 |             |
| 1.034182458 | 1                                                                                                                                                                                                                                    | 1.119414951 | 1.224958983 | 0.855765843 | 0.839380821 |             |
| 0.967213773 | 1                                                                                                                                                                                                                                    | 1.017513609 | 1.25043959  | 1.090128844 | 0.989473811 |             |
| 1.315787052 | 1                                                                                                                                                                                                                                    | 0.880600596 | 0.904809753 | 1.032538122 | 1.264834382 |             |
| 0.790935441 | 2.682911841                                                                                                                                                                                                                          |             |             |             |             |             |
| YGL141W     | YGL141W::HUL5::ubiquitin-protein ligase (E3)                                                                                                                                                                                         |             |             | 1           | 1.57269696  |             |
| 1.161811691 | 1.349094284                                                                                                                                                                                                                          | 1.298355799 | 1           | 1.254936432 | 1.123547374 |             |
| 1.344523203 | 1.486514587                                                                                                                                                                                                                          | 1           | 1.088937579 | 1.294887798 | 1.115862102 |             |
| 1.195843385 | 1                                                                                                                                                                                                                                    | 1.592660859 |             | 1.143099741 |             |             |
| 0.752561362 |                                                                                                                                                                                                                                      | 1           | 1.079352767 | 0.869718567 | 0.971230131 |             |
| 0.703657272 | 1                                                                                                                                                                                                                                    | 1.021472529 | 0.894360257 | 0.958882818 | 0.800962221 |             |
| 0.721396081 | 1                                                                                                                                                                                                                                    | 0.942509534 | 0.726715299 | 0.726870048 | 0.956940785 |             |
| 25.24686695 |                                                                                                                                                                                                                                      |             |             |             |             |             |

YGL143C YGL143C::MRF1::Mitochondrial polypeptide chain release factor 1  
0.777168705 0.945135864 1.101068509 0.948373912 1 0.985469314  
1.030049074 1.014947574 1.202778338 1 0.907872851 0.91902569  
0.884629409 1.013900776 1 1.237107123 1.056217656 0.868996725  
0.998932527 1 1.434444896 2.408400985 0.961836401 1.36130849 1  
1.310969874 1.303253486 1.437074778 1.106256005 1.262683451 1  
1.284042973 0.887320126 1.197802684 0.807083037 0.628059178 1  
1.243409644 1.01867807 0.99347761 0.935423497 1.167716073 1.000838238  
YGL145W YGL145W::TIP20::transport protein that interacts with Sec20p;  
required for protein transport from the endoplasmic reticulum to the golgi  
apparatus 1 0.707981079 0.728501748 0.861813638 0.945383424 1  
0.884579115 0.796199507 0.737978096 0.730698414 1 0.663604412  
0.719072698 0.584816596 0.922148522 1 0.646220321 0.411830634  
0.537408007 0.911454025 1 0.873988693 1.045346387 0.911297501  
0.853681242 1 0.852773355 0.854158971 0.812123207 1.016880532 1  
1.103637726 1.013993113 0.912938402 0.93900169 0.714164982 1  
0.943110443 0.967760485 1.005549366 1.108626581 10.16687032  
YGL147C YGL147C::RPL9A::Homology to rat L9 1 1.303816956 1.253088364  
0.922756621 1.838901984 1 1.015882768 0.954486634 1.465555323  
1.314863991 1 0.907532109 0.933758041 0.625425663 0.954400634 1  
0.847229711 0.432929415 0.22874483 0.581434678 1 1.407426086  
0.991578263 0.462536958 0.7344166 1 1.110000747 1.022222134  
0.832914733 0.965450361 1.133635457 1 1.242960486 1.349688788  
0.798135085 0.527353142 1.500025373 1 1.566308491 1.855868419  
1.308196904 2.764182243 1.514600133 1.720601189  
YGL149W YGL149W::YGL149W::molecular\_function unknown 0.928390408  
0.942941314 1.489370491 0.951557871 1.408076649 1.334534167  
0.960610532 1.004850073 1.115209614 1.354935496 0.621677118  
1.13269022 0.554706751 0.821053507 0.307340086  
0.164769721 1 1.010551329 1.344031859 1.273147498 1.044653332  
1.061049166 1 1.034185768 0.69464189 0.828496403 1.251201963  
0.753012961 1 0.718276086 0.613416403 1.081522371 0.77657201  
0.671934726  
YER004w YER004w::YER004W::molecular\_function unknown 1 1.238059134  
0.983150838 0.77318999 0.653749841 1 0.969400815 1.03005129  
0.761455937 0.849436869 1 1.123486177 1.315094441 1.768424099  
0.599075792 1 1.209968526 1.258789469 1.644488661 1.854539953 1  
0.99562623 1.036337024 1.316510595 1.144863175 1 1.089928168  
1.408040844 1.87584829 1.141532128 0.917024268 1 1.261459656  
1.808086138 2.671149581 2.219670389 0.568200353 1 1.261129185  
1.393586128 1.203823286 1.046884807 0.744234764 0.993833232  
YGL151W YGL151W::NUT1::Negative regulator of URS2 of the HO promoter 1  
0.620785031 0.614016448 0.704831528 1 0.928967758 0.940994788  
0.589886411 0.584539868 1 0.756297158 0.728626699 0.351377186  
0.640769053 1 1.066524639 0.763956118 0.696238717 1  
0.987425506 1.214374653 0.606961061 1.089269718 1 0.96050579  
0.978750439 0.984366176 1.045723231 1.027509396 1 0.983715276  
0.721042195 0.964283556 0.809693 0.712880031 1 1.1644338  
1.213552722 1.116588249 1.052429756 0.901892695  
YER006w YER006w::NUG1::NUclear GTPase 1 1.009919142 0.669116272  
0.957649773 0.698158106 1 0.883850782 0.857390895 0.720416247  
1.030889322 1 0.647394028 0.436006346 0.343789933 0.982062817 1  
0.571294118 0.310749546 0.307272996 0.367559528 1 0.547460754  
0.171490951 0.206636788 0.366639604 1 0.973491719 0.618787993  
0.842426704 1.167625149 1.07797484 1 1.018588287 0.457325286  
0.650465974 0.948122682 0.347022174 1 0.723023445 0.458191544  
0.689396186 0.313154443 0.735524137

YER019w YER019w::ISC1 1 0.85386877 0.848623941 0.690067306  
0.555968426 1 0.92406953 0.991565057 0.862298464 0.85516819 1  
0.996367002 0.967875435 0.957103514 1 0.792947038 0.617056705  
0.788864131 0.693853104 1 0.947667214 1.895300002 1.169389202  
0.97345601 1 1.166152872 1.202074978 1.215754647 1  
0.987029989 1.151724345 0.84717593 0.90176045 1.054951306 1  
0.714881326 0.839500785 0.809396551 0.896238442 0.68490877 0.909773366  
YER021W YER021W::RPN3::proteasome subunit 1 0.757621209 0.806056028  
0.849269332 0.76658019 1 0.805707531 0.915186943 0.818386943  
0.804144174 1 0.72766023 1.004007076 0.947102449 0.755852767 1  
1.463305347 0.961985285 1.432142936 1.633222645 1 1.6308409  
2.340274387 2.269758718 1.754578296 1 1.178609296 1.358361557  
1.586922398 0.883691454 1.037595364 1 1.313821662 1.588410044  
1.160276961 0.732036355 0.685578956 1 1.247526964 1.188174041  
1.067304214 0.849626436 0.82845772 1.074390646  
YER023w YER023w::PRO3::delta 1-pyrroline-5-carboxylate reductase 1  
1.185094083 1.099155883 0.724479431 0.734317127 1 1.011234188  
0.990240443 0.952298143 0.870533974 1 0.912978907 0.978224223  
1.381297728 0.715908002 1 1.047311883 0.80770058 1.020808156  
1.163119851 1 1.343472835 1.577879491 1.584671992 1.276406491 1  
1.164115872 0.952707341 1.498879233 1.267880729 1.092629539 1  
1.107307941 1.146780449 0.928690804 0.826641032 0.906587976 1  
1.096009127 1.029501921 1.063477431 1.024283606 0.931957092 1.09453  
YER025w YER025w::GCD11::eIF2 is a heterotrimeric GTP-binding protein <br>  
SUI2 encodes the alpha subunit<br> SUI3 encodes the beta subunit  
1.200504854 1.05568427 1.234433153 1.135604007 1.24826059  
1.115956148 1.097083452 1.023435445 1.073012463 0.841942736  
0.662576889 1.118005399 1 0.50966027 0.325892805 0.350684956  
0.547219562 1 0.532205422 0.498693621 0.537490054 0.415930937 1  
0.962456114 0.735855944 0.852035105 1.078586481 0.898388514 1  
1.061327364 0.740537902 0.699541921 0.735314272 0.611252089 1  
0.761117419 0.667882695 0.673378505 0.747472017 0.561887752 1.274032958  
YER027c YER027c::GAL83::Glucose repression protein 1 0.948736144  
1.224132171 1.16046632 1.008324492 1 1.320467955  
1.060467707 1 0.893759688 1.24387927 1.346674571 1.088616854 1  
1.46065201 1.422979403 1.245775472 1.374901302 1 1.270541374  
1.285856721 1.6228323 1.212229481 1 1.184937412 1.312317602  
1.319777663 1.039435149 1 1.107571737 1.208523238 1.090568636  
0.843875067 0.718258545 1 1.007328275 1.084050747 1.015149261  
0.953234817 0.913723008 1.464918933  
YER029c "YER029c::SMB1::associated with U1, U2, U4, and U5 snRNPs as part of  
the Sm-core that is common to all spliceosomal snRNPs" 1 0.880580841  
1.102106408 0.965270229 1.160925347 1 0.85113934 0.950436841  
1.225815174 1.393903745 1 0.966190362 1.083706519 1.358497069  
1.051706626 1 0.7250821 0.606674925 0.86160062 0.903313635 1  
1.623783547 2.193808083 1.769413758 0.774392195 1 0.883804851  
1.120892568 0.729701623 0.723800346 0.964778754 1 1.033850547  
1.218814655 0.978613876 1.459245055 1 1.021011141 0.986678455  
1.192442947 1.275989214 1.437643733 0.953554524  
YER043c YER043c::SAH1::putative S-adenosyl-L-homocysteine hydrolase 1  
1.120364328 0.817292388 0.922354302 0.527117969 1 1.078474417  
0.988495752 0.728647224 0.74496118 1 0.958507832 0.810937032  
0.609514309 0.622356811 1 0.812184133 1.149129762 0.952767957  
0.467573856 1 0.628120848 0.453982922 0.443799746 0.661273921 1  
0.944096112 0.591759534 0.837497728 1.637870313 0.910215353 1  
0.721301301 0.35420819 0.330163319 0.627820519 0.535942781 1  
0.650708432 0.341391762 0.683880294 0.612674595 0.504060975 0.575284973

YER044c YER044c::ERG28::Transmembrane domain containing protein which may facilitate protein-protein interactions between the Erg26p dehydrogenase and the Erg27p 3-ketoreductase and/or to tether these enzymes to the ER 1

1.25175018 1.620540731 0.957634866 1.562835909 1 1.128278695  
1.230044782 1.361031578 1.118566806 1 1.104378614 1.586340986  
3.149402496 0.930463621 1 1.007518297 0.813605347 1.234406589  
1.842637349 1 1.523229131 2.87539131 3.280570912 1.238896762 1  
0.89817566 0.620878466 1.042216747 2.141913208 1.650301544 1  
0.608931788 0.457770987 0.51114148 2.006824375 3.472745279 1  
0.789982142 0.616086759 1.716104664 2.695743446 1.846562197 3.216167037

YOR380W YOR380W::RDR1::Repressor of drug resistance 1 1.195057107

1.109933708 1.498455733 1 1.36357844 1.464535315 1.316484055  
1.189150586 1 1.302350408 1.320111474 1.124690603 1.351724483 1  
0.963991135 0.800026132 1 0.978711656 1.352029923  
0.835905081 1 1.036181756 1.251041977 1.085742573 1.389924041  
1.160392132 1 1.034474741 0.813272651 0.797217889 1.084707926  
0.682384106 1 0.805101595 0.612257547 1.046768901 0.507191807  
1.242407898 1.513953872

YOR394W YOR394W::YOR394W::molecular\_function unknown 1 0.971641381

1.076231691 0.832548232 0.929320952 1 0.783339803 0.932002685  
1.208597089 1.209043754 1 1.232723165 1.097190644 1.543108139  
1.014486186 1 1.243668301 0.816053389 1.597994874 1.646034995 1  
1.893642198 3.238923417 2.264579375 0.449840808 1 1.171717366  
0.886969223 1.040948197 1 0.986555812  
1 0.862174873 0.632430866 0.939911347 6.286104609

YOR394W YOR394W::YOR394W::molecular\_function unknown 1 1.61309864

1.603355004 1 1 1.336849045  
1.506469248 1.729663237  
1 1.188563217 1.466870696 1.787325077 1.728798048  
1.43607953 1 0.95807753 1.448630964 1.374799584 1.118911643  
1.282458038 1 1.874393614 2.241623579 1.311729656 1.613028844  
1.546623036 1.351963482

YPL002C YPL002C::SNF8::appears to be functionally related to SNF7 1

1.087943911 1.239658478 1.031910844 1.401466511 1 1.000345581  
0.967011886 1.267821176 1.22899801 1 0.892424404 1.16373239  
1.157867275 1.226827992 1 1.215328082 1.063718455 1.268063234  
1.840151754 1 1.163156981 1.315151245 1.635429701 1.01272864 1  
1.158973137 1.014150913 0.970334772 1.065102877 1 0.905464151  
1.066230502 0.850169377 1.034050507 1.300564348 1 1.067107157  
0.933003304 1.034668722 1.159867785 1.31513026 0.93078828

YPL004C YPL004C::YPL004C::molecular\_function unknown 1 1.368930517

1.665269474 1.80820609 1.661335789 1 1.699368197 2.043039729  
1.546536255 1.488626168 1 1.19300208 1.984643768 2.381228146  
1.160245706 1 2.825061409 2.454914906 3.370418213 2.108906186 1  
1.98644072 1.475597126 2.325448243 1.408837386 1 1.017412604  
1.238555363 1.421819519 0.864339951 0.922455193 1 1.234542735  
1.220636056 1.180051695 0.873682064 0.857972468 1 1.281102034  
1.094291167 1.170644415 1.147677193 2.344513917 0.979823219

YGL165C YGL165C::YGL165C::molecular\_function unknown 1 0.988912342

1.138528899 0.954337974 1.165311051 1 0.905638495 0.959852739  
1.291289354 1.256534683 1 1.088261949 1.155078652 1.39099693  
1.3261112 1 1.736866917 1.675846408 1.477374646 2.586621161 1  
1.624078608 1.86232485 1.72153328 1.735505832 1 1.029532397  
0.916721839 0.751736652 0.802535268 1 1.313654065 1.505992537  
1.121954936 1.224676463 1.725446664 1 1.294774439 1.43157231  
1.188135325 1.182019909 1.23112736

YPL006W YPL006W::NCR1::Niemann-Pick Type C homologous gene 1  
1.633059035 1.57039773 1.253097555 1 1  
1.34376751 1.216024796 1.442185368  
1.153875843 1 1.469680658 1.094006258  
1.544345797 1.144420734 1.216417965 1 1.119693269  
1.083359095 1.301836404 1 1.097553388 1.620368551 1.308798782  
1.237556316  
YGL167C "YGL167C::PMR1::Ca++-Pump, ATPase" 1 1.731250655 1.534365932  
1.618304712 1.566016827 1 1.585139449 1.396216829 1.497118819  
1.620222197 1 1.243641062 1.487202617 1.298130113 1.475938826  
0.664269431 1 1.01693145  
1.054612754 1.140732862 1.107455389 0.997977494 1 0.993716297  
1.016408046 0.726905993 0.738190447 1 1.151504851  
1.102616857 1.152921658 0.988579451  
YPL008W "YPL008W::CHL1::Required for mitotic chromosome segregation, needed  
for wild-type levels of meiotic recombination and spore viability" 1  
1.306424018 1.146236514 1.506562035 1 1.015033361  
1.481124339 1 0.779442948 0.906390985 0.992493011 1.398624449  
1 0.820760546  
0.877957605 1.05195171 0.804687876 0.848962276 1 1.386225068  
1.57522143 1 1.43424438 1.507973123 1.723872873 1.551800092  
1.364978727  
YGL169W YGL169W::SUA5::Protein involved in translation initiation 1  
1.468445338 0.940160419 1.275473366 1.166318479 1 1.220978245  
1.187770813 1.21993527 1.39345521 1 0.935719357 0.746408827  
0.674436899 1.234096625 1 0.636039938 0.681006034 1  
0.557356338 1.109305695 0.963659894 1  
0.830372457 0.917929564 0.765230149 0.916377782 0.943145556  
0.759973167 0.938668951  
YPL010W YPL010W::RET3::vesicle coat component 1 1.134887569  
1.213786487 0.959399175 1.509341895 1 1.182218164 0.927715462  
1.539509058 1.231998054 1 0.922666902 1.029265078 1.252020535  
0.981092294 1 1.039321682 0.673155459 0.789648254 1.392877653 1  
1.669857201 1.783238039 1.821359447 1.43941166 1 1.229751128  
1.496301206 1.208626761 1.133951085 1.083139191 1 1.096109748  
1.524351838 1.124017498 0.905347673 1.545425644 1 0.94387813  
1.407261898 0.860832019 1.608446077 1.34129926 1.652302457  
YGL171W YGL171W::ROK1::contains domains found in the DEAD protein family of  
ATP-dependent RNA helicases; high-copy suppressor of kem1 null mutant 1  
0.994140455 0.718903076 0.961286618 1.194164444 1 0.83608269  
0.709657962 0.969278866 1.076012264 1 0.511942499 0.31725276  
0.330122955 0.929572256 1 0.42757382 0.227377766 0.521267047 1  
0.594739385 0.670531833 0.679330048 1 0.606157995 0.47814781  
0.532697562 0.720442478 0.786447927 1 0.754082389 0.550141925  
0.449396471 0.665036445 0.960752604 1 0.660994802 0.594777846  
0.777546713 1.071531608 0.469352629 0.943047067  
YPL024W YPL024W::NCE4::Negative regulator of Cts1 Expression 1  
0.91303493 1.161297363 0.952834665 1.168785701 1 0.940225997  
0.957648022 1.45707683 1.545765481 1 0.747430171 0.800547234  
1.626815288 1.270678203 1 1.157618523 0.779937861 1.29336207  
2.36224063 1 1.478253081 2.183819339 2.224540258 1.620633056 1  
0.868479237 0.966112194 1.03389167 0.996877974 1 0.762119373  
0.788517172 0.933587873 1.032691835 1.882338328 1 0.927338405  
1.087409106 1.388833826 1.523101123 1.891533826 1.933377744  
YGL173C YGL173C::KEM1::Kar1-1 nuclear-fusion-defect Enhancing Mutation.  
Plays a role in cytoplasmic mRNA degradation. 1 1.216262422 1.162553547  
1.56372138 1.066382871 1 1.451719927 1.449231459 1.143060543

|             |                                                                            |             |             |             |             |   |
|-------------|----------------------------------------------------------------------------|-------------|-------------|-------------|-------------|---|
| 0.934380588 | 1                                                                          | 1.321822135 | 1.300707836 | 0.653693436 | 1.268594143 | 1 |
| 1.094353828 | 0.807359965                                                                | 0.685969917 | 0.485714734 | 1           | 0.963131989 |   |
| 1           | 0.900973001                                                                | 0.915722263 | 1.168845715 | 1.000169596 | 0.819852491 | 1 |
| 1.130308302 | 0.715051342                                                                | 0.897771257 | 0.877840651 | 0.482227658 | 1           |   |
| 0.829701588 | 0.887344716                                                                | 0.911030213 | 0.601371691 | 0.815723613 | 0.620817408 |   |
| YPL026C     | YPL026C::SKS1::multicopy suppressor of snf3 and grr1 mutants               |             |             |             |             | 1 |
| 1.168807015 | 1.113709466                                                                | 1.148681257 | 1           | 1.115938116 | 1.123334487 |   |
| 1.079805792 | 1.238729742                                                                | 1           | 0.696082578 | 0.849856326 | 1.031472317 |   |
| 1.203497712 | 1                                                                          | 1.123110084 | 1.451328616 |             |             |   |
| 1           | 0.86845596                                                                 | 0.802577973 | 0.966695913 | 1.110319843 | 0.975234072 | 1 |
| 0.672185161 | 0.847175887                                                                | 0.904888578 | 1.061319368 | 1.161646101 | 1           |   |
| 0.670711821 | 0.961737405                                                                | 0.930493774 | 1.080607748 | 0.758921318 | 0.963186421 |   |
| YPL026C     | YPL026C::SKS1::multicopy suppressor of snf3 and grr1 mutants               |             |             |             |             | 1 |
| 1.002272065 | 1.112184512                                                                | 1.031032389 | 1.11900913  | 1           | 1.152302317 |   |
| 1.041175227 | 0.984752548                                                                | 0.946943307 | 1           | 0.678092371 | 0.761835558 |   |
| 1.032813712 | 1.412134047                                                                | 1           | 0.705225354 | 0.699423431 | 0.966709649 |   |
| 1.323277244 | 1                                                                          | 1.055285536 | 1.008934891 | 1.933359564 | 1.923697779 | 1 |
| 0.993899611 | 1.148679967                                                                | 1.109454988 | 1.241169739 | 1.136137425 | 1           |   |
| 1.041966278 | 1.442659801                                                                | 1.002738499 | 0.905753022 | 1.389146298 | 1           |   |
| 1.048554923 | 1.592219378                                                                | 0.795243105 | 1.586057494 | 0.920649155 |             |   |
| YGL175C     | YGL175C::SAE2::Involved in meiotic recombination and chromosome metabolism |             |             |             |             | 1 |
| 1.126242754 | 1.285070397                                                                | 1.105457981 | 1.047112191 | 1           | 1.120844695 |   |
| 1.152425837 | 1                                                                          | 0.936352452 | 0.843989647 |             |             |   |
| 1.09473637  | 0.6914172                                                                  | 1           | 0.707320475 |             | 0.793474095 |   |
| 0.809155234 | 1                                                                          | 0.620072011 | 1.444430952 |             |             |   |
| 1.130594625 | 0.720444608                                                                | 1.131319775 | 0.47896632  |             |             |   |
| YPL028W     | YPL028W::ERG10::induced under stress conditions                            |             |             |             |             | 1 |
| 0.994473472 | 1.06531555                                                                 | 0.959892873 | 1           | 1.28033438  | 1.32647221  |   |
| 0.936332622 | 1.003802479                                                                | 1           | 1.595963916 | 2.825681229 | 2.936008587 |   |
| 1.725865738 | 1                                                                          | 1.137377485 | 0.934118831 | 1.54441393  | 1.693035996 | 1 |
| 0.962696676 | 0.717313767                                                                | 0.993942527 | 1.14449883  | 1           | 0.913696207 |   |
| 0.699419931 | 1.201556999                                                                | 1.346320797 | 0.797861216 | 1           | 0.83452001  |   |
| 0.68930999  | 0.59792288                                                                 | 0.651905272 | 0.821266458 | 1           | 0.607747214 |   |
| 0.548886264 | 0.655683221                                                                | 0.872120425 | 0.710844371 | 1.157574951 |             |   |
| YGL189C     | YGL189C::RPS26A::Homology to rat S26                                       |             |             |             |             | 1 |
| 1.654326366 | 0.944760086                                                                | 2.323480735 | 1           | 1.141937634 | 1.146972184 |   |
| 1.603035409 | 1.570343645                                                                | 1           | 1.001758443 | 1.070363501 | 1.161216074 |   |
| 1.132221915 | 1                                                                          | 0.737245045 | 0.329762453 | 0.222102525 | 0.629437568 | 1 |
| 1.469732019 | 1.254723817                                                                | 1.035828997 | 0.775587607 | 1           | 0.87475742  |   |
| 1.137487289 | 0.764938689                                                                | 0.885967517 | 0.904837833 | 1           | 1.415707267 |   |
| 2.099163594 | 1.307694569                                                                | 0.978100701 | 2.414883317 | 1           | 0.837152386 |   |
| 1.172565081 | 0.873919616                                                                | 1.588929847 | 0.960565116 | 1.354590372 |             |   |
| YGL191W     | YGL191W::COX13::Modulates cytochrome c oxidase activity                    |             |             |             |             | 1 |
| 1.131016576 | 1.656289939                                                                | 1.086697178 | 2.178531051 | 1           | 1.175020194 |   |
| 1.163578009 | 1.639073002                                                                | 1.690251698 | 1           | 0.825644115 | 1.124836728 |   |
| 1.739488369 | 0.974203288                                                                | 1           | 1.39535165  | 1.464976186 | 1.371978372 |   |
| 1.952139247 | 1                                                                          | 1.45772082  | 1.674864509 | 1.898842779 | 1.225788364 | 1 |
| 0.630035541 | 0.596250685                                                                | 0.417998257 | 0.691813081 | 0.624069649 | 1           |   |
| 0.836580587 | 0.536119087                                                                | 0.326769082 | 0.722227314 | 1.691128502 | 1           |   |
| 0.753828986 | 0.53335924                                                                 | 0.657346757 | 1.512796884 | 2.062201677 | 0.933415171 |   |
| YGL193C     | YGL193C::YGL193C::molecular_function unknown                               |             |             |             |             | 1 |
| 1.733167883 | 1.087923516                                                                | 1.558132953 | 1           | 1.288770497 | 1.054338127 |   |
| 1.585482932 | 1.673356241                                                                | 1           | 1.633508729 | 1.184265055 | 1.985473652 |   |
| 1.330695512 | 1                                                                          | 1.07084521  | 0.959426545 | 0.947900105 | 1           |   |
| 1.34772733  | 2.363754373                                                                | 1.402572196 | 1.262530828 | 1           | 0.94460718  |   |
| 0.918030408 | 1.05457409                                                                 | 0.980630575 | 0.865664365 | 1           | 0.635690385 |   |



|         |                                                                                                                                           |             |             |             |             |               |
|---------|-------------------------------------------------------------------------------------------------------------------------------------------|-------------|-------------|-------------|-------------|---------------|
|         | 0.705892053                                                                                                                               | 1.008695577 | 0.990846316 |             | 0.543139911 | 0.826014712   |
|         | 1.317961485                                                                                                                               | 0.96651419  | 0.915902707 |             |             |               |
| YER046w | YER046w::SPO73::Sporulation 1 1.007546896 1.218290736                                                                                     |             |             |             |             |               |
|         | 1.068602307                                                                                                                               | 1.476049619 | 1           | 1.0798443   | 0.987728339 | 1.362176819   |
|         | 1.442536387                                                                                                                               | 1           | 0.949576487 | 1.054970187 | 1.73611113  | 1.144592408 1 |
|         | 0.780605767                                                                                                                               | 1.00907677  | 1.526081893 | 1.410756646 | 1           | 0.878905587   |
|         | 1.895649619                                                                                                                               | 1.642252169 | 0.87670847  | 1           | 0.94227361  | 1.166498949   |
|         | 1.004427023                                                                                                                               | 0.855613102 | 1.114444365 | 1           | 0.840149397 | 1.380989156   |
|         | 1.000018003                                                                                                                               | 1.110673308 | 2.150953671 | 1           | 1.173318089 | 1.378643845   |
|         | 1.995478228                                                                                                                               | 1.715921098 | 1.20660989  |             |             |               |
| YGL195W | YGL195W::GCN1::translational activator of GCN4 through activation of GCN2 in response to starvation 1 1.561605284 1.129813856 2.058211064 |             |             |             |             |               |
|         | 0.892480437                                                                                                                               | 1           | 1.767646058 | 1.55502785  | 1.13509191  | 1.026572729 1 |
|         | 1.608269026                                                                                                                               | 1.41237385  | 0.755128961 | 1.529060156 | 1           | 1.207677572   |
|         |                                                                                                                                           |             |             | 1           | 0.94634366  | 0.747267612   |
|         | 1.080744297                                                                                                                               | 1.301077877 | 0.863402568 | 1           | 1.041937138 | 0.574321435   |
|         | 0.566101773                                                                                                                               | 0.916369656 | 0.423074382 | 1           | 0.704194304 | 0.531402314   |
|         | 0.865245494                                                                                                                               | 0.506930504 | 0.57698923  | 0.93078828  |             |               |
| YER048c | YER048c::CAJ1::Homologous to E. coli DnaJ; contains leucine zipper-like motif 1 0.543382275 0.769464633 0.743402798 0.847120054 1         |             |             |             |             |               |
|         | 0.686220834                                                                                                                               | 0.761152304 | 0.952575115 | 0.885418991 | 1           | 0.613782087   |
|         | 0.877888938                                                                                                                               | 0.804732183 | 0.816781534 | 1           | 0.870767486 | 0.78659993    |
|         | 1.217101683                                                                                                                               | 1           | 2.050259187 | 2.568801238 | 2.825167798 | 2.0231756 1   |
|         | 1.10589111                                                                                                                                | 1.300555484 | 1.203957219 | 0.989793531 | 1.147521487 | 1             |
|         | 1.17973052                                                                                                                                | 1.459415491 | 1.278388531 | 1.049831983 | 1.061035064 | 1             |
|         | 0.981360052                                                                                                                               | 1.07907146  | 0.838493151 | 0.983904626 | 1.021341642 | 0.817832829   |
| YER050c | YER050c::RSM18::protein similar to bacterial ribosomal subunit S18 1 0.659114511 1.186883758 0.933248634 1.424553161 1 0.798893699        |             |             |             |             |               |
|         | 0.899953689                                                                                                                               | 1.224574424 | 1.146487496 | 1           | 0.886411348 | 1.111603877   |
|         | 1.511507982                                                                                                                               | 1.028864969 | 1           | 1.069497783 | 1.018807204 | 0.801096276   |
|         | 1.151012069                                                                                                                               | 1           | 1.995149768 | 2.198821478 | 2.496466144 | 1.684444346 1 |
|         | 0.87329241                                                                                                                                | 1.049804597 | 0.605302126 |             | 0.767755733 | 1 1.557112659 |
|         | 2.240413844                                                                                                                               | 1.584890964 | 1.89131562  | 3.048452386 | 1           | 1.257655975   |
|         | 1.827020006                                                                                                                               | 1.370254976 | 2.205218933 | 2.06572056  | 1.331824128 |               |
| YER052c | YER052c::HOM3::First step in common pathway for methionine and threonine biosynthesis 1 1.346008035 0.875942496 0.706300169 0.457792311 1 |             |             |             |             |               |
|         | 0.994710482                                                                                                                               | 0.867269784 | 0.550151118 | 0.574341714 | 1           | 2.322437429   |
|         | 1.124587769                                                                                                                               | 0.383392056 | 0.354513094 | 1           | 0.820324211 | 1.790965808   |
|         | 1.007188204                                                                                                                               | 0.418969751 | 1           | 0.964904508 | 1.033005668 | 0.363603527   |
|         | 0.771059857                                                                                                                               | 1           | 0.866964912 | 0.76071599  | 0.765964472 | 0.977372071   |
|         | 0.763964374                                                                                                                               | 1           | 1.495351824 | 0.710178375 | 0.677707044 | 0.566340826   |
|         | 0.347706003                                                                                                                               | 1           | 0.985322554 | 0.409649531 | 0.603682555 | 0.401811661   |
|         | 0.241901764                                                                                                                               | 0.589294933 |             |             |             |               |
| YER065c | YER065c::ICL1::component of glyoxylate cycle 1 1.014014978                                                                                |             |             |             |             |               |
|         | 1.10391856                                                                                                                                | 1.043693799 | 1.268641744 | 1           | 0.973462126 | 0.988025656   |
|         | 1.209544353                                                                                                                               | 1.221412494 | 1           | 0.916130215 | 1.039422576 | 1.198752305   |
|         | 1.070626918                                                                                                                               | 1           | 0.889734654 | 0.851447243 | 1.069827772 | 0.955126067 1 |
|         | 1.013597629                                                                                                                               | 0.911476918 | 0.668605107 | 0.848067934 | 1           | 1.035547547   |
|         | 1.024097171                                                                                                                               | 1.15853131  | 1.34931108  | 1.226386503 | 1           | 0.763534335   |
|         | 0.730178234                                                                                                                               | 0.826018533 | 0.75161181  | 0.635655435 | 1           | 0.800877255   |
|         | 0.743698784                                                                                                                               | 0.830968995 | 0.725422616 | 0.761970205 | 0.844977137 |               |
| YER067w | YER067w::YER067W::molecular_function unknown 1 1.061552512                                                                                |             |             |             |             |               |
|         | 1.478555382                                                                                                                               | 1.060979403 | 1.266025381 | 1           | 1.07779834  | 1.326596635   |
|         | 1.476917562                                                                                                                               | 1.158296851 | 1           | 1.222411416 | 1.562116911 | 2.806332092   |
|         | 1.013839766                                                                                                                               | 1           | 7.547059149 | 4.057277915 | 4.354290889 | 2.656711562 1 |
|         | 3.858329743                                                                                                                               | 4.682427963 | 6.205011387 | 1.102341644 | 1           | 1.893845168   |
|         | 3.737923448                                                                                                                               | 2.462272421 | 0.729245871 | 1.634842321 | 1           | 1.82767865    |

|         |                                                                                             |             |             |             |             |             |
|---------|---------------------------------------------------------------------------------------------|-------------|-------------|-------------|-------------|-------------|
|         | 2.801259871                                                                                 | 5.36227237  | 0.68380763  | 1           | 3.89045995  | 2.935554273 |
|         | 0.969763812                                                                                 | 1.578529454 | 5.150432413 | 1.894850366 |             |             |
| YER069w | "YER069w::ARG5,6::N-acetyl-gamma-glutamyl-phosphate reductase and acetylglutamate kinase" 1 |             |             |             |             |             |
|         | 2.07325786                                                                                  | 1.498375674 | 1.342909028 | 0.647446747 | 1           |             |
|         | 1.411830961                                                                                 | 1.424355303 | 0.808876709 | 0.688425889 | 1           | 2.558019606 |
|         | 2.06059817                                                                                  | 0.505899854 | 0.631835024 | 2.150884777 | 1.505838212 |             |
|         | 0.745602878                                                                                 | 0.598255068 | 1           | 1.980544547 | 1.474515824 | 0.673688893 |
|         | 1.023391915                                                                                 | 1           | 0.805191966 | 0.625716514 | 1.014933355 | 1.368097038 |
|         | 1.001473374                                                                                 | 1           | 0.944676608 | 0.646566037 | 0.922990347 | 1.721715879 |
|         | 0.460812586                                                                                 | 0.377968903 | 0.721508262 | 0.440511932 | 0.466375221 | 1           |
| YER071c | YER071c::YER071C::molecular_function unknown 1                                              |             |             |             |             |             |
|         | 1.354695988                                                                                 | 0.90706698  | 1.197493667 | 1           | 0.934398026 | 1.066946242 |
|         | 1.665334287                                                                                 | 1.443702727 | 1           | 0.898283607 | 0.964840899 | 1.543331353 |
|         | 1.261143375                                                                                 | 1           | 0.867226076 | 1.431654875 | 1           | 1.415997064 |
|         | 1.416509828                                                                                 | 1.605235446 | 1.191546704 | 1           | 1.015744164 | 1.105067393 |
|         | 1.055593767                                                                                 | 0.864950527 | 1.140849841 | 1           | 0.892616249 | 1.084922392 |
|         | 1                                                                                           | 1.147084018 | 0.962541018 | 1.311574733 | 1.563864476 |             |
| YER073w | YER073w::ALD5::Utilizes NADP+ as the preferred coenzyme. Activated by K+. 1                 |             |             |             |             |             |
|         | 1.136976017                                                                                 | 0.792748806 | 0.705529812 | 0.48420621  | 1           |             |
|         | 0.844449344                                                                                 | 0.815275939 | 0.66253787  | 0.624601639 | 1           | 1.981174804 |
|         | 0.691799774                                                                                 | 0.383735969 | 0.587170167 | 1           | 0.725033404 | 0.540134361 |
|         | 0.436312116                                                                                 | 0.611827628 | 1           | 1.438744812 | 0.89130591  | 0.636454626 |
|         | 0.681180046                                                                                 | 1           | 1.032480562 | 1.105798166 | 1.420786007 | 1.182676188 |
|         | 1.051615528                                                                                 | 1           | 1.550302393 | 0.942439368 | 0.817133883 | 0.738703293 |
|         | 0.401990992                                                                                 | 1           | 1.090057852 | 0.777697382 | 0.914833087 | 0.814226819 |
|         | 0.59729733                                                                                  | 0.694369817 |             |             |             |             |
| YER075c | YER075c::PTP3::Protein tyrosine phosphatase 1                                               |             |             |             |             |             |
|         | 1.04872897                                                                                  |             |             |             |             |             |
|         | 0.956482604                                                                                 | 1.098031463 | 0.980681907 | 1           | 1.016879142 | 1.011412348 |
|         | 1.050069492                                                                                 | 1.088337533 | 1           | 0.936445887 | 0.986494066 | 0.757725332 |
|         | 1.059931082                                                                                 | 1           | 0.769315963 | 1.212508433 | 0.763811833 |             |
|         | 0.522710984                                                                                 | 0.374603374 | 0.647931881 | 1.02485238  | 0.93144578  |             |
|         | 1.093172749                                                                                 | 1.007367678 | 0.943475793 | 1           | 0.909927434 | 0.955570831 |
|         | 0.871964665                                                                                 | 0.656661075 | 0.788948517 | 1           | 0.830309911 | 0.903564511 |
|         | 0.876579277                                                                                 | 0.662372057 | 0.999087012 |             |             |             |
| YPL030W | YPL030W::YPL030W::molecular_function unknown 1                                              |             |             |             |             |             |
|         | 1.616355011                                                                                 |             |             |             |             |             |
|         | 1.479063692                                                                                 | 1.479975844 | 1.585902703 | 1           | 1.519855169 | 1.397572494 |
|         | 1.730334259                                                                                 | 1           | 1.25342014  | 1.221095186 | 1.116968806 | 1.561629535 |
|         | 0.775307532                                                                                 |             | 1           | 0.529448242 | 0.575913112 |             |
|         | 0.741621931                                                                                 | 1           | 0.710954868 | 0.645819432 | 0.691742961 | 0.770652779 |
|         | 0.793833002                                                                                 | 0.735234886 | 0.611881656 | 0.85125279  | 0.647865848 | 1           |
|         | 0.596736628                                                                                 | 0.664299221 | 0.758924945 | 0.92336608  | 0.598322823 | 0.839723408 |
| YPL032C | YPL032C::SVL3::Styryl dye vacuolar localization 1                                           |             |             |             |             |             |
|         | 1.179295667                                                                                 |             |             |             |             |             |
|         | 1.036132549                                                                                 | 1.544871281 | 1.217108025 | 1           | 1.372001035 | 1.352403787 |
|         | 0.975956695                                                                                 | 1.043600898 | 1           | 0.999709778 | 0.807908201 | 0.515682983 |
|         | 1.197931839                                                                                 | 1           | 0.696621964 | 0.455429431 | 0.52509683  | 0.467344446 |
|         | 0.432408716                                                                                 | 0.338629868 | 0.224408965 | 0.542301491 | 1           | 0.889819659 |
|         | 0.702044968                                                                                 | 0.663457167 | 0.858797508 | 0.65575623  | 1           | 0.710652549 |
|         | 0.481697865                                                                                 | 0.711551293 | 0.913313013 | 0.401344608 | 1           | 0.939683841 |
|         | 0.543838545                                                                                 | 1.079688178 | 0.781903198 | 0.917060753 | 0.658469225 |             |
| YPL034W | YPL034W::YPL034W::molecular_function unknown 1                                              |             |             |             |             |             |
|         | 0.929297438                                                                                 |             |             |             |             |             |
|         | 1.083787683                                                                                 | 1.128399148 | 1.598676204 | 1           | 1.051514376 | 0.979470165 |
|         | 1.389824766                                                                                 | 1           | 0.821448309 | 0.987198125 | 1.365107658 | 1.255016335 |
|         | 0.974418157                                                                                 |             | 1.086388163 | 1           | 2.485094587 |             |
|         | 2.571286457                                                                                 |             | 1.006918677 | 0.789064624 | 1.110928405 | 1           |
|         | 0.807210574                                                                                 | 1.041577798 | 0.930576871 | 1.014268912 | 1           | 1.173855642 |
|         | 1.111941263                                                                                 | 1.030645786 | 0.917653933 |             |             |             |

YPL048W YPL048W::CAM1::Calcium and phospholipid binding protein homologous  
to translation elongation factor 1-gamma (EF-1gamma) 1 0.744770014  
0.82004545 0.64120001 0.48512733 1 0.768792679 0.735563122  
0.609755265 0.760806431 1 0.891834182 0.693097749 0.760379753  
0.577422257 1 0.881385611 0.523892194 0.70271781 1.210095886 1  
1.055213493 0.697825635 0.651271533 0.746813695 1 1.120561211  
0.892182699 0.896069013 1.210953879 0.900578098 1 0.978067223  
0.785321892 0.858568761 0.762020938 0.498413565 1 1.081630546  
0.592921498 0.836925685 0.645064771 0.745168232 0.64270804  
YGL197W YGL197W::MDS3::Mck1 Dosage Suppressor 3; negative regulator of early  
meiotic gene expression 1 1.255931451 1.176638969 1.550702108 1.09803207 1  
1.436261172 1.466766734 1.234358047 1.126488585 1 1.209081289  
1.529703176 0.939069435 1.280202327 1 1.294145873 2.046967839  
1 1 0.900117823 0.883806794 1.006835427  
1.209956474 0.950092217 1 1.015045266 0.604571007 0.673874833  
0.953868433 0.455864667 1 0.941285345 0.682078254 0.964138319  
0.594835083 0.822274763 0.592797436  
YPL050C YPL050C::MNN9::Protein required for complex glycosylation 1  
0.866824653 0.955293734 1.003464193 1.314656214 1 0.913152892  
1.081746347 0.982072846 1.056637007 1 0.755702298 0.705285099  
0.593365041 1.083430003 1 0.721594614 0.446792583 0.551174486  
0.918715211 1 1.02971782 0.601504196 0.652743271 0.867381793 1  
0.983902983 0.836875478 0.94145706 0.929169718 1.082378311 1  
0.792269453 0.831264676 0.880962726 0.735204879 0.830389059 1  
0.921932421 0.84773374 1.045119545 1.016106942 0.81082126 0.881753341  
YGL199C YGL199C::YGL199C::molecular\_function unknown 1 1.458727939  
1.217954999 0.895634037 0.698728836 1 1.261000635 1.222631359  
0.932350084 0.867708366 1 1.564558419 1.415206119 1.550447168  
0.831263345 1 0.968152556 0.794069905 0.835753184 1.06625436 1  
1.456861527 0.875101061 0.826726797 0.927292177 1 1.00720976  
0.852128951 1.264954409 1.100296147 0.94246268 1 0.870083672  
0.895178851 0.997078369 0.868931663 0.613849137 1 1.032058698  
0.858224092 1.113124242 0.754767149 0.933624432 1.03936572  
YPL052W YPL052W::YPL052W::molecular\_function unknown 1 1.487375112  
1.384239966 1.312014958 2.291522975 1 1.294976501 1.330132719  
2.132318867 1 0.977572996 1.037439482 1.379966687 1.309258064 1  
0.731280188 0.561588868 0.698190884 1.069659787 1 1.037512819  
2.397327978 1.204318336 2.25277009 1 0.907289006 1.113427981  
0.846225648 0.880896925 1.141052924 1 0.720784512 1.449359737  
1.029675998 1.057481347 1.125285694 1 1.320435385 1.711704575  
1.367699809 1.437801244 1.199293682 1.531466335  
YGL213C "YGL213C::SKI8::essential for protection against viral cytopathology,  
dispensable for mitotic but required for meiotic recombination and spore  
viability" 1 1.271247272 1.038314116 1.20422844 1.136939703 1  
1.214549429 1.191953281 0.930102836 0.990283682 1 1.044128759  
0.981724216 0.892885332 0.943071203 1 1.362792673 1.104457556  
1.105906541 1 0.451391575 0.605736984 1 1.005350219  
0.956793932 0.83875532 0.893908394 0.790526262 1 1.028141711  
0.848357393 0.720652232 0.698809981 0.775678033 1 1.112482587  
0.898004032 0.877344008 0.865639532 1.112933847 0.87825089  
YPL054W YPL054W::LEE1::Product of gene unknown 1 1.273360282  
1.510061809 1.209782091 1.625553068 1 1.291355987 1.390838422  
1.780376659 1 1.471093136 2.844756297 3.511817898 2.359021327 1  
2.752962345 2.310012516 4.833486424 3.895836688 1 1.347904969  
2.115737666 2.004916297 2.56654868 1 1.05776447 1.214238786  
1.074962967 1.149110855 1 0.737379572 0.971529053 1.405265971

1.337139778 1.657007567 1 1.159972202 1.178422657 1.484281848  
2.197344678 1.076141872  
YGL215W YGL215W::CLG1::cyclin-like protein that interacts with Pho85p in  
affinity chromatography 1 1.3867361 1.594624031 1.772297807 1.727920744 1  
1.779311548 1.44282249 1 1.309827886 1.514761554  
1.403588171 1.341193294 0.843058254  
1 0.746073292 0.70597649 0.773022436 1.130021956  
0.511024703 1 0.669487388 0.646302497 0.738614789 0.907165111  
0.501440882 1 0.895898605 0.870991382 1.066744058 0.798608167  
0.827003531 0.716260448  
YGL215W YGL215W::CLG1::cyclin-like protein that interacts with Pho85p in  
affinity chromatography  
0.946172225 0.75784262 1  
1.716913078 2.17987994 0.708210256  
2.90269361  
YPL056C YPL056C::YPL056C::molecular\_function unknown 1 1.200461438  
1.177391382 1.035040396 1.094510577 1 1.184783692 1.069563314  
1.086329959 1.1067188 1 1.13776484 1.293178547 1.564971718  
0.939179842 1 0.955797652 1.742430167 1.067246588 1  
0.99169765 1.678987186 0.817680803 0.783180771 1 1.029885386  
1.232619602 0.959872437 1.099204721 1.079126203 1 0.619691419  
0.759905577 0.753594275 1.361519636 0.92529901 1.078325925  
1.001489377 0.974916087 1.344179248 1.31289483 0.989455116  
YGL217C YGL217C::YGL217C::molecular\_function unknown 1 1.494154302  
1.364245835 1.808662407 1.189236867 1 1.691860709 1.900449919  
1.451697969 1.187431923 1 1.472390623 1.505441012 0.785447522  
2.012108137 1 0.635590288 0.832031038 0.751358424 1  
0.913975064 1.783237966 1.474311448 1 1.130899817  
1.265437256 1.589177353 1.205883952 1 0.884536139 0.575563971  
0.59427235 1.326302905 0.123319197 1.167017549  
0.653215497  
YPL058C YPL058C::PDR12::similar to Pdr5p 1 1.297914521 1.169848004  
1.364603473 1.294938311 1 1.344391883 1.379826485 1.228872791  
1.168173865 1 1.295548345 1.412633757 1.23927406 1.22858839 1  
0.82662273 1.000679597 1.103883639 1 0.683066232 1.033301491  
0.571280751 0.506162222 1 0.76006242 0.672162236 0.733383678  
0.725141277 0.805850025 1 1.133913098 0.961367901 1.483232937  
1.435355064 1.011111269 1 1.225001115 1.463070369 0.853637826  
1.592682184 0.651527328 1.440401463  
YGL219C YGL219C::MMM2 1 1.268640939 1.420473007 1.199371008  
1.532374158 1 1.30859195 1.335560533 1.473667172 1.236033607 1  
1.526845907 1.29044494 1.339568719 1.068809448 1 0.978700152  
0.85773684 0.817563333 0.842739377 1 1.145467799 1.883099339  
1.000807814 0.977787854 1 0.982431296 1.08365056 0.873618646  
0.85108952 0.978840841 1 1.169023181 1.246518524 1.186857285  
0.947083177 1.39988711 1 1.215657143 1.220138744 1.050361881  
1.181885425 1.404452967 1.145316164  
YPL072W YPL072W::UBP16::putative deubiquitinating enzyme 1  
0.691899897 0.961042501 1.092879763 1.218249442 1 0.975887995  
1.122808359 1.137945446 1.064124738 1 0.790397421 0.925270829  
1.042032181 0.98808003 1 0.970564142 0.572532749 0.721745097  
1.061722559 1 0.907474817 1.743316178 1.446227357 0.637915637 1  
1.184902859 1.180993395 0.883635498 0.826093747 1.429722552 1  
1.573156316 1.481250143 1.496990613 1.255707038 1.195039567 1  
1.310392951 1.231073698 1.202467479 1.268612513 1.743655661 1.073514981

YGL221C YGL221C::NIF3::similar to Listeria monocytogenes major sigma factor  
(rpoD gene product) 1 1.144437657 1.183019298 1.054915989 1.168826371 1  
1.142262572 1.03906285 1.332604501 1.351708866 1 1.043944329  
1.239983385 1.309014962 1.318224088 1 1.301328382 0.993368726  
1.017215857 1.619935457 1 1.142259774 0.903109383 1.165380663  
1.304674636 1 1.148687251 1.023150309 1.282435102 0.985301697  
0.82431534 1 1.040497011 1.292792709 1.185933086 0.854036204  
1.041305563 1 0.966985335 1.148213623 0.974533605 0.896930214  
0.970414337 0.934290836  
YGL223C YGL223C::COG1::<b><u>C</u></b>onserved <b><u>O</u></b>ligomeric  
<b><u>G</u></b>olgi complex <b><u>1</u></b><br> Complexed with Cog8p; interacts  
with Cog2p 1 1.03547675 0.939161685 1.116782366 0.925946056 1  
1.023117924 1.075794967 0.909222676 0.845193711 1 1.152607356  
0.959507113 0.823304229 0.861177331 1 1.033641263 0.936224618  
0.816468165 0.853110081 1 0.82899074 0.602555048 0.789672532  
0.958305894 1 1.039979162 0.980180209 0.974874835 0.850886636  
0.882396501 1 1.241625427 1.21440641 1.184798068 1.122094829  
1.325777559 1 1.096829184 1.129347885 1.122898197 1.030805666  
1.349174279 0.983325775  
YGL237C YGL237C::HAP2::Global regulator of respiratory genes 1  
1.290392571 1.192101843 1.220702903 1.297016351 1 1.226208745  
1.223135348 1.174583703 1.256373191 1 1.377704762 1.165007042  
1.444617274 1.15200233 1 1.060976892 1.01815878 1.01860814  
0.927088084 1 1.061834274 0.65690088 0.875270569 1  
0.937415666 0.757756449 0.791403231 0.709635337 0.946249919 1  
1.085670628 1.084476436 1.165847653 0.958242134 1.208684656 1  
1.237250273 1.350496945 1.128970538 1.362580848 1.504061988 0.960559531  
YER088c YER088c::DOT6::Derepression Of Telomeric silencing 1  
0.900935043 0.808075465 0.719179847 0.574061733 1 0.865352147  
1.071854305 0.587362645 0.641564117 1 1.216531598 0.883938237  
0.923135025 0.70405236 1 0.893632229 0.888600956 1.105891639 1  
0.780390796 1.16364908 0.693917179 0.734701271 1 0.984143912  
1.005823103 1.18133511 1.362575959 1.00049531 1 1.009295468  
0.864463831 0.957146532 1.121134217 0.739164491 1 0.824621712  
0.836005185 0.915244401 0.87291139 0.762874206 1.607645634  
YGL239C YGL239C::YGL239C::molecular\_function unknown 1 0.745676161  
0.665044972 1.215479223 0.471316452 1 1.053284219 1.25030701  
0.745101827 0.584608175 1 0.9667586 0.860859717 0.412820285  
0.872855132 1 0.415297498 0.463000098 0.53703253 0.393830151 1  
1.024794598 0.605627459 1 0.958845186 0.621117708  
1.286397752 1.101421639 1 1.100642722 0.415576827 0.565928187  
1.026006967 0.356314435 1 0.758985422 0.41043598 0.6547382  
0.387565527 0.783598719 0.519245027  
YER090w YER090w::TRP2::anthranilate synthase Component I 1  
0.913733843 0.814930286 0.849528797 0.689233655 1 0.842527992  
0.877805916 0.710434572 0.703079863 1 1.108537407 1.105512332  
0.505065986 0.659974647 1 1.045831009 1.089315001 0.696310535  
0.823236262 1 0.88144533 1.042621064 0.676842537 1.125211408 1  
1.332776782 1.003642239 1.457126527 1.335031469 1.067703936 1  
1.024740587 0.909431907 1.010164345 0.729918027 0.41403736 1  
1.212065161 1.133243499 0.863299853 0.565236589 0.773176006  
YER092w YER092w::IES5::Ino Eighty Subunit 5 1 0.824010819 0.934289171  
0.784368512 1.188479561 1 0.78011882 0.758354424 1.043047705  
1.16383555 1 0.804619051 0.905778901 1.125658127 1.033285378 1  
0.981528669 0.653156424 0.716924876 1.43796613 1 1.675222101  
1.947861992 1.918567699 1.714073241 1 1.181790644 1.444541393  
1.050479349 1.333125722 1 1.159843933 1.727210651 1.185797188

1.419313093 2.530818085 1 1.299754426 1.505073212 1.140322788  
1.433647596 1.24869805 1.160201842  
YER094c YER094c::PUP3::20S proteasome subunit beta3\_sc 1 0.892258257  
1.074453145 1.014374533 1.215370644 1 1.009163843 1.071329144  
1.445329505 1.451028463 1 0.839197861 1.342212226 1.896642465  
1.106666608 1 1.224431799 0.949992661 1.672593983 2.185789218 1  
1.943915952 3.033293248 2.902765705 1.69704981 1 1.576706845  
1.794046442 2.041345083 1.068071106 1.371569221 1 1.53806878  
2.326359323 2.323479493 1.056118186 1.019572575 1 1.468254929  
2.041328627 1.372094793 1.303495187 0.947851473 1.245137372  
YER096w YER096w::SHC1::Required for proper maturation of the ascospore  
through its participation in the synthesis of the chitosan layer. 1  
0.933709587 1.124502468 1.474525829 1.263611646 1 0.907700967  
1.012506087 1.428040256 1.88582012 1 0.827368286 0.827117693  
1.799946901 1.76593333 1 0.555160512 0.772550311 0.921863187  
0.989533423 1 0.841618727 2.014637734 1.065524178 1.147951009  
0.909585007 0.781420428 0.760775499 0.836725941 1.040119876 1  
0.611931679 1.481283061 1 0.97857955 0.979197107 1.063043897  
1.312988058 1.036786502 0.921156488  
YER098w YER098w::UBP9::similar to Ubp13p 1 0.999400044 1.160136798  
1.114078968 1.042021491 1 1.139240844 1.224645564 1.050976679  
0.998455133 1 1.036002108 1.122756897 1.10865565 1.097237707 1  
1.061769799 0.745666401 1.130099358 1.117252712 1 1.415141118  
1.783046221 1.508046559 1.375375261 1 1.123494328 1.044935833  
0.871171273 0.976663178 1 0.923552003 0.848682518 1.111128199  
0.976658712 0.963856609 1 1.416889811 1.061412615 1.205941275  
1.130796394 1.52967283 0.943047067  
YER112w YER112w::LSM4::Like Sm-D3 protein 1 0.754204563 1.170541708  
0.825133995 1.403041729 1 0.786724294 0.753651044 1.163205394  
1.178954573 1 0.829431666 0.826680878 1.072616726 0.886149702 1  
0.524920875 0.461913229 1.067912835 1 1.608976949 2.038835616  
2.101653449 1.167335406 1 0.736392492 0.881044994 0.577182818  
0.566254635 1.014385167 1 1.141330343 1.410135492 1.204063561  
1.241161496 2.278940866 1 1.237808882 1.388515591 1.144610191  
1.705098656 1.819504524 1.224998019  
YER114c "YER114c::BOI2::Protein which binds Bem1p and contains a proline-  
rich sequence, an SH3 domain, and a pleckstrin homology domain" 1  
0.998073062 0.892001946 1.090802354 0.973852028 1 1.176219388  
1.091529346 0.775010689 0.801220036 1 1.160287989 0.921601475  
0.700076473 1.018454074 1  
1 0.918870978 0.897102677 0.880321919 1.226318385 0.84936256 1  
0.772067244 0.494324183 0.664971672 0.675335657 0.507100951 1  
0.815176459 0.591460548 0.855125057 0.711256288 0.635207977 0.760917271  
YER116c YER116c::SLX8 1 0.679179802 0.880548551 0.784076989  
0.950148108 1 0.753033033 0.810194612 0.825165652 0.872850119 1  
0.699157517 0.745979794 0.660650134 0.802099724 1 0.825863357  
0.357324685 0.377918667 0.76038694 1 1.422658827 0.841384837  
0.798305529 1.132093248 1.077007501 1.065540923 1.140591454 1  
0.795494688 0.893251406 1.116498926 1.161966475 1 0.978579538  
1.259027091 1.39149915  
YER118c YER118c::SHO1::Transmembrane osmosensor (structurally unrelated to  
SLN1) with four transmembrane segments & a cytoplasmic SH3-domain. The SH3-  
domain interacts with a proline-rich motif in the N-terminal region of Pbs2p (a  
MAP kinase kinase homolog) 1 0.797361483 0.895900494 0.916048738 1  
0.834881254 0.828138352 0.859666781 0.896811448 1 0.823505563  
0.561252438 0.531490149 0.961551671 1 0.729427337 0.580633912  
0.646131242 0.909906735 1 0.698971495 0.483474839 0.534427859 1

1.069583258 0.928947953 0.902649698 0.950266715 0.919769173 1  
0.907244758 0.948696287 0.836071856 0.758909604 1.060982239 1  
0.903178802 0.924356093 0.950589188 1.085999866 1.011319457 0.899265805  
YPL074W YPL074W::YTA6::Member of CDC48/PAS1/SEC18 family of ATPases 1  
0.786534316 0.791683644 0.931987316 0.980730657 1 0.856608693  
0.87293179 0.915262638 0.948681792 1 0.764834801 0.79494827  
0.704254641 0.979888177 1 0.640699868 0.797435521 1  
1.100435107 0.792751925 0.940245568 1 1.01966598 1.091865996  
1.047593429 1.023667218 1.045540784 1 1.105506093 0.859738429  
1.188767355 0.809280317 0.7323131 1 0.885696938 0.79005561  
0.828604378 0.919050446 0.629845777 0.816081552  
YPL076W "YPL076W::GPI2::Required for synthesis of N-acetylglucominyolphosphatidylinositol, the first intermediate in synthesis of glycosylphosphatidylinositol (GPI) anchors" 1 1.206160699 0.785975864  
0.948228615 0.951066068 1 1.231354694 0.969260258 0.780374095 1  
1.199330284 0.980472657 1.093869489 0.973871924 1 1.056989207  
1.487478457 1.338104993 0.513397664 0.617256873 0.402231929  
0.367451291 1.118435802 1.052018349 0.922427625 1.183826612  
0.882235975 1 0.761218838 0.765780262 0.806489676 0.806058421  
0.699359938 1 1.059346481 1.10017108 1.023872204 0.888831304  
1.032404696 1.082271213  
YPL078C YPL078C::ATP4::ATP synthase F0 sector subunit 4; analogous to the bovine b subunit 1 0.841511403 1.03099994 0.906555182 1.469197951 1  
0.946478799 1.032440274 1.262080854 1 0.685143107 0.831814711  
0.924459329 0.998121766 1 1.287063257 1.19488539 0.990137755  
1.644419668 1 1.553757612 1.252577713 2.26378137 2.019664157 1  
1.143059111 1.190833204 0.928785747 0.933486363 1.009963804 1  
1.005489641 1.142353583 1.045095156 0.780019286 1.232055863 1  
1.128898277 1.141142261 0.819764182 1.511885522 1.804953099 1.297674762  
YPL080C YPL080C::YPL080C::molecular\_function\_unknown 0.849588027  
1.063656029 0.964959971 1.490969789 0.862038351 0.629372901  
1.318323677 0.747491846 0.846173613 1.065732193 0.996610809 1  
0.610208069 0.650023853 0.526974869 0.853954712 1 0.900777573  
1.73688336 1.310316816 1.119479455 1 0.650436072 0.644461707  
0.457746799 0.557219586 1.007289217 1 0.777911188 1.619851151  
0.832971936 0.643077661 2.37502361 1 1.008753714 1.611720985  
1.099443829 2.361511817 1.355458214 1.428142781  
YGL241W YGL241W::KAP114::KARYOPHERIN (collective name for homologous family of nuclear transport receptors) of approximately 114kD  
0.920164976 1.035403195 0.997569463 0.749096504 1.046734228  
0.960561283  
1 1.113903442 0.848133395 1.288622695 1.370522978  
1.007227789 1 0.85712337 0.730178195 0.702472815 0.539299211  
0.657519975 1 0.924213998 0.800185411 0.653148018 1.018927942  
0.561134733  
YPL082C YPL082C::MOT1::involved in TBP (TATA-binding protein) regulation 1  
1.505463216 1.146194425 1.503704748 0.948241316 1 1.490541939  
1.233430786 1 1.375429727 1.02451759 0.883528706 1.022399653 1  
0.606777778 0.533268509 0.494722098 0.484965591 1 0.676396602  
1.096583979 0.61919078 0.604067843 1 0.861596286 0.661978104  
0.85738834 1.139127949 0.822660447 1 0.633994139 0.485126895  
0.834920043 0.540271287 0.309094521 1 0.708626548 0.542735416  
0.867017666 0.719429672 0.542658263 0.594548714  
YGL243W YGL243W::TAD1::Deaminates adenosine-37 to inosine in eukaryotic tRNA-Ala. 1 0.909216684 1.05746316 0.930733088 1.161181997 1  
0.833808469 0.764936887 1.19078 1.087508323 1 0.794314862  
0.917848086 0.986911603 1.133068499 1 1.113305475 1.043439885

|             |                                                                                                                                             |             |             |             |             |             |
|-------------|---------------------------------------------------------------------------------------------------------------------------------------------|-------------|-------------|-------------|-------------|-------------|
| 1.610219577 | 1                                                                                                                                           | 1.350798123 | 1.736445922 | 1.534520433 | 0.910105528 | 1           |
| 0.895583658 | 0.68399112                                                                                                                                  | 0.640704776 | 0.985248359 |             | 1.065061081 |             |
| 1.328992401 | 0.908365969                                                                                                                                 | 1.199898014 | 1.785129658 | 1           | 0.962261019 |             |
| 1.109932563 | 1.055052282                                                                                                                                 | 1.273414724 | 1.048970422 | 1.169833634 |             |             |
| YPL096W     | YPL096W::PNG1::de-N-glycosylation enzyme                                                                                                    | 1           |             |             | 0.783972053 |             |
| 1.148747863 | 0.986908633                                                                                                                                 | 1.279029117 | 1           | 0.979842872 | 1.066705427 |             |
| 1.221600724 | 1.099140905                                                                                                                                 | 1           | 0.976796869 | 0.982757422 | 1.096200587 |             |
| 1.019917419 | 1                                                                                                                                           | 0.875261203 | 0.641186504 | 0.769132801 | 1.065527942 | 1           |
| 1.501524283 | 2.468073491                                                                                                                                 | 1.964067314 | 1.336674312 | 1           | 1.043060507 |             |
| 1.167349462 | 0.842203827                                                                                                                                 | 0.767853367 | 0.941239397 | 1           | 1.042892586 |             |
| 1.263378079 | 1.304879502                                                                                                                                 | 1.214078154 | 1.609018042 | 1           | 1.305165185 |             |
| 1.167766274 | 1.140938506                                                                                                                                 |             | 1.752404962 | 1.108540012 |             |             |
| YGL245W     | YGL245W::YGL245W::glutamate-tRNA ligase                                                                                                     | 1           |             |             | 0.97308403  |             |
| 0.753493354 | 0.963068351                                                                                                                                 | 0.699254046 | 1           | 1.187448043 | 1.044228633 |             |
| 0.713951891 | 0.711110458                                                                                                                                 | 1           | 0.885326715 | 0.843864607 | 0.562309777 |             |
| 0.727893323 | 1                                                                                                                                           | 1.718468403 | 1.543969089 | 1.372600283 | 1.256750791 | 1           |
| 0.763224271 | 0.585988318                                                                                                                                 | 0.438823114 | 0.738453851 | 1           | 0.96006677  |             |
| 0.865171827 | 1.073536167                                                                                                                                 | 0.99601631  | 0.828578042 | 1           | 1.083458208 |             |
| 1.245273703 | 0.915605266                                                                                                                                 | 0.757625841 | 0.867329938 | 1           | 1.241434315 |             |
| 1.252488118 | 1.153880281                                                                                                                                 | 0.974066579 | 1.160343301 | 0.890509573 |             |             |
| YPL098C     | YPL098C::YPL098C::molecular_function unknown                                                                                                | 1           |             |             | 1.584094975 |             |
| 1.669206999 | 0.816689928                                                                                                                                 | 1.090096464 | 1           | 1.231452367 | 1.323516081 |             |
| 1.156108403 | 1                                                                                                                                           | 1.381228984 | 1.320267836 | 1.938103445 | 0.827570712 | 1           |
| 1.041264577 | 0.762214761                                                                                                                                 | 0.722569839 | 1.614692351 | 1           | 1.347263249 |             |
| 1.620036052 | 1.59758292                                                                                                                                  | 1.107216468 | 1           | 1.347664953 | 1.26921337  |             |
| 1.223757172 | 1.201658906                                                                                                                                 | 1.167628225 | 1           | 1.005912611 | 1.276512624 |             |
| 0.928209401 | 0.715920026                                                                                                                                 | 1.233142577 | 1           | 0.94640817  | 1.113079515 |             |
| 0.857997549 | 1.295513919                                                                                                                                 | 0.908035284 | 1.28366475  |             |             |             |
| YGL247W     | YGL247W::BRR6::<u>B</u>ad <u>R</u>esponse to <u>R</u>efrigeration                                                                           | 1           |             |             |             |             |
| 1.189229922 | 1.270370447                                                                                                                                 | 1.084244716 | 1.55668114  | 1           | 1.053210277 |             |
| 0.942834606 | 1.661096992                                                                                                                                 | 1.497862023 | 1           | 0.820513985 | 0.978289429 |             |
| 1.472478858 | 1.227336022                                                                                                                                 | 1           | 0.697524347 | 0.373681046 | 0.69089217  |             |
| 1.418938219 | 1                                                                                                                                           | 2.105517793 | 2.102082816 | 1           | 0.843933461 |             |
| 0.910702138 | 0.737396128                                                                                                                                 | 0.768657022 | 0.944279644 | 1           | 0.829037784 |             |
| 1.18257931  | 1.099550634                                                                                                                                 | 1.069527542 | 1.702238651 | 1           |             |             |
| 1.15760693  | 1.622058596                                                                                                                                 | 1.127486174 | 1.39486908  |             |             |             |
| YPL100W     | YPL100W::MAI1::Maturation of pro-AmInopeptidase I (proAPI) defective; protein similar to Aut10p and YGR223Cp with three putative WD repeats | 1           |             |             |             |             |
| 1           | 1.721662653                                                                                                                                 | 1.791906473 | 1.677908803 | 1.801930536 | 1           | 1.671911873 |
| 1.741619653 |                                                                                                                                             | 1.839958016 | 1           | 1.461994264 | 1.715674207 | 1.733297443 |
| 1.781587005 |                                                                                                                                             | 0.7780786   |             | 0.673896523 |             | 0.497099293 |
|             | 0.752296697                                                                                                                                 |             | 0.924421413 | 0.655325523 | 0.99719175  |             |
| 0.936777662 | 1                                                                                                                                           | 0.865709186 | 0.540414355 | 0.5877678   | 0.65282528  |             |
| 0.562278019 | 1                                                                                                                                           | 0.849246805 | 0.770768432 | 0.892337414 | 1.362686315 |             |
| 0.674995638 | 1.360719714                                                                                                                                 |             |             |             |             |             |
| YGL261C     | YGL261C::YGL261C::molecular_function unknown                                                                                                | 1           |             |             | 1.044096583 |             |
| 1.21633108  | 0.895689075                                                                                                                                 | 1.226066919 | 1           | 0.967146389 | 0.868812919 |             |
| 1.321905433 | 1.194622818                                                                                                                                 | 1           | 1.092383716 | 1.104894213 | 1.86432253  |             |
| 1.199841953 | 1                                                                                                                                           | 1.656520236 | 0.932632474 | 1.713984416 | 2.251375609 | 1           |
| 1.519700247 | 2.591864737                                                                                                                                 | 1.724754069 | 1.223590527 | 1           | 1.14780932  |             |
| 1.349673222 | 1.250936964                                                                                                                                 | 1.11759648  | 0.916488122 | 1           | 0.912947864 |             |
| 1.57569795  | 1.552548385                                                                                                                                 | 1.558407866 | 1.875430098 | 1           | 0.908600361 |             |
| 1.334205505 | 1.047646331                                                                                                                                 | 1.18974785  | 1.265183932 | 1.229376134 |             |             |
| YPL102C     | YPL102C::KRE24::Killer toxin REsistant                                                                                                      | 1           |             |             | 1.129248978 |             |
| 1.069814073 | 1.338249833                                                                                                                                 | 0.970540496 | 1           | 1.234769816 | 1.117474045 |             |
| 1.047906142 | 1.269763875                                                                                                                                 | 1           | 1.078860428 | 0.956971648 | 1.290445445 | 1           |
| 0.677525423 |                                                                                                                                             | 0.780598729 | 0.544111258 | 1           | 0.826956394 |             |



|         |             |                                                                                                                                                                                                          |             |             |             |             |             |   |
|---------|-------------|----------------------------------------------------------------------------------------------------------------------------------------------------------------------------------------------------------|-------------|-------------|-------------|-------------|-------------|---|
|         | 1           | 0.98757393                                                                                                                                                                                               | 0.80727728  | 1.056015067 | 0.935884861 | 1.263398735 | 1           |   |
|         |             | 0.933239172                                                                                                                                                                                              | 0.629778709 | 0.695414973 | 1.22962464  | 0.509578017 | 1           |   |
|         |             | 0.89950237                                                                                                                                                                                               | 0.431732037 | 1.094785638 | 0.915920491 | 0.599150586 | 0.881753341 |   |
| YGL263W |             | "YGL263W::COS12::Protein with strong similarity to subtelomerically-encoded proteins including Cos2p, Cos4p, Cos8p, YIR040c, Cos5p, Cos9p, and Cos6p"                                                    |             |             |             |             |             |   |
|         | 1           | 1.355231637                                                                                                                                                                                              | 1.351518188 | 1.12948042  | 1.285019997 | 1           |             |   |
|         | 1.236367022 | 1.142255834                                                                                                                                                                                              |             | 1.091546866 | 1           | 1.03417701  | 1.027569588 |   |
|         | 1.035923929 | 1.149948874                                                                                                                                                                                              | 1           |             |             |             | 0.167640041 |   |
|         |             | 1                                                                                                                                                                                                        | 0.990999728 | 1.003793274 |             | 1.126628675 | 1.119604864 |   |
|         |             |                                                                                                                                                                                                          | 1.853591205 | 3.019873667 | 1           |             | 0.884883816 |   |
| YPL104W |             | "YPL104W::MSD1::Aspartyl-tRNA synthetase, mitochondrial"                                                                                                                                                 |             |             |             |             |             | 1 |
|         | 0.742192154 | 0.923418639                                                                                                                                                                                              | 1.20087658  | 1.071498264 | 1           | 1.020137855 |             |   |
|         | 1.180675077 | 0.953209242                                                                                                                                                                                              | 1.024327091 | 1           | 0.910097297 | 0.981025745 |             |   |
|         | 0.963895696 | 1.097097786                                                                                                                                                                                              | 1           | 1.123143615 | 1.028241281 | 1.246028532 |             |   |
|         | 1.280119903 | 1                                                                                                                                                                                                        | 1.193110093 | 1.398224793 | 1.22198867  | 0.896429524 | 1           |   |
|         | 0.947095924 | 1.06140014                                                                                                                                                                                               | 1.014637627 | 0.99934119  | 1.167209406 | 1           |             |   |
|         | 1.539359013 | 1.127056018                                                                                                                                                                                              | 1.310046899 | 1.117533218 | 1.007452907 | 1           |             |   |
|         | 1.17885713  | 0.871849536                                                                                                                                                                                              | 0.940272653 | 0.958366995 | 1.031436997 | 0.83446968  |             |   |
| YGR002C |             | YGR002C::GOD1::Protein required for cell viability                                                                                                                                                       |             |             |             |             |             | 1 |
|         | 0.754963709 | 0.948588265                                                                                                                                                                                              | 0.92397751  | 0.889865809 | 1           | 0.956461187 |             |   |
|         | 1.031085403 | 0.974455942                                                                                                                                                                                              | 0.856976218 | 1           | 0.81096491  | 0.888900819 |             |   |
|         | 0.7203689   | 0.962692704                                                                                                                                                                                              | 1           | 0.77959763  | 0.654334859 | 0.913817888 |             |   |
|         | 1.047267853 | 1                                                                                                                                                                                                        | 0.884085756 | 2.354746765 | 1.430316348 | 1.214945    | 1           |   |
|         | 1.113435868 | 1.214486921                                                                                                                                                                                              | 1.069081572 | 1.143922588 | 1.166421782 | 1           |             |   |
|         | 1.025777862 | 0.931901952                                                                                                                                                                                              | 0.84827904  | 1.010655756 | 1.169889715 | 1           |             |   |
|         | 1.096160784 | 0.923854453                                                                                                                                                                                              | 1.036044536 | 1.042835038 | 1.344334926 | 0.87825089  |             |   |
| YGR004W |             | YGR004W::YGR004W::molecular_function_unknown                                                                                                                                                             |             |             |             |             |             | 1 |
|         | 0.994601832 | 1.082239358                                                                                                                                                                                              | 0.964882295 | 1           | 1.142045475 | 1.00903531  | 1.222056072 |   |
|         | 1.102395284 | 0.962561992                                                                                                                                                                                              | 1           | 1.006657918 | 0.889403105 | 0.700715716 |             |   |
|         | 1.051656347 | 1                                                                                                                                                                                                        | 0.802229198 |             | 0.846522373 | 1.058425736 | 1           |   |
|         | 1.081375803 | 0.880598696                                                                                                                                                                                              | 0.990061812 | 0.945266335 | 1           | 1.107397719 |             |   |
|         | 1.208643435 | 1.069081572                                                                                                                                                                                              | 1.219842115 | 0.999356194 | 1           | 0.840709196 |             |   |
|         | 0.997086012 | 0.788693826                                                                                                                                                                                              | 0.642515328 | 0.79720757  | 1           | 1.092440996 |             |   |
|         | 0.861059947 | 0.989709543                                                                                                                                                                                              | 1.060832818 | 0.907954473 | 0.830967177 |             |             |   |
| YGR006W |             | YGR006W::PRP18::Prp18 acts in concert with Slu7 during the second step of yeast pre-mRNA splicing.                                                                                                       |             |             |             |             |             | 1 |
|         | 1.25973804  | 1                                                                                                                                                                                                        | 1.323246827 | 1.932168959 | 1.439497085 | 1.213920962 | 1           |   |
|         | 1.349050563 | 1.712004307                                                                                                                                                                                              |             | 1.396057646 | 1           | 0.564254263 |             |   |
|         | 0.781825799 | 1                                                                                                                                                                                                        | 0.934946785 |             | 1.194128717 | 0.845067941 | 1           |   |
|         | 0.843823491 | 0.582849126                                                                                                                                                                                              | 0.790954906 |             | 0.886443734 | 1           | 1.237063788 |   |
|         | 0.808906961 |                                                                                                                                                                                                          |             | 1           | 0.924608533 |             |             |   |
|         | 1.088807939 |                                                                                                                                                                                                          |             |             |             |             |             |   |
| YER120w |             | "YER120w::SCS2::Suppressor of Choline Synthesis<br>Likely to be involved in regulating INO1 expression, suppressor of a dominant nuclear mutation that is inositol-dependent in the presence of choline" |             |             |             |             |             | 1 |
|         | 1.047407399 | 0.922487236                                                                                                                                                                                              | 0.684872862 | 0.627696824 | 1           | 0.928662653 |             |   |
|         | 0.903730277 |                                                                                                                                                                                                          | 0.753978366 | 1           | 0.937237585 | 0.952833928 | 1.156005615 |   |
|         | 0.78054333  | 1                                                                                                                                                                                                        | 1.179110958 | 0.843585195 | 0.955741405 | 0.967970559 | 1           |   |
|         | 1.078131976 | 0.860327747                                                                                                                                                                                              | 0.941717748 | 0.836411781 | 1           | 1.040148654 |             |   |
|         | 0.854281769 | 1.028860651                                                                                                                                                                                              | 1.121205404 | 0.73311046  | 1           | 0.81601685  |             |   |
|         | 0.865741794 | 0.706488168                                                                                                                                                                                              | 0.617347167 | 0.863326707 | 1           | 0.839565959 |             |   |
|         | 0.89984242  | 0.789126259                                                                                                                                                                                              | 0.861457507 | 0.938668951 |             |             |             |   |
| YGR008C |             | YGR008C::STF2::ATPase stabilizing factor                                                                                                                                                                 |             |             |             |             |             | 1 |
|         | 2.654729626 | 1.810764947                                                                                                                                                                                              | 2.497691537 | 1           | 1.573758933 | 2.053094299 |             |   |
|         | 3.266617307 | 2.409157733                                                                                                                                                                                              | 1           | 1.661033549 | 3.795091003 | 8.614733356 |             |   |
|         | 2.042890549 | 1                                                                                                                                                                                                        | 7.92838547  | 9.361699791 | 9.769618849 | 10.64799584 | 1           |   |

4.919564876 8.269444156 12.92808009 3.305762312 1 1.159929618  
1.902647419 2.276341943 0.902570281 1.438705067 1 1.666525018  
3.843392561 5.506864131 3.066077031 2.636719056 1 2.2063344  
2.80992489 1.737762701 1.767002253 5.253422113 1.837059195  
YER122c YER122c::GL03::Zinc-finger-containing protein with similarity to  
Gcs1p and Sps18p 1 0.760112516 0.774552474 0.840995264 0.827792626 1  
0.74000221 0.761352054 0.765839029 1 0.744274871 0.774481261  
0.657845858 0.905041803 1 0.653839555 0.696930784 0.611212389  
0.800001904 1 0.906967971 0.850247907 0.878959139 1.234370531 1  
0.889105659 0.889477159 0.782817608 0.833418819 0.969336672 1  
0.836464952 0.948023532 0.753606395 0.766820714 0.841961169 1  
1.025744396 1.110650089 1.029144917 0.931682924 0.936744327 1.282789189  
YER136w YER136w::GDI1::Regulates vesicle traffic in secretory pathway by  
regulating dissociation of GDP from Sec4/Ypt/rab family of GTP-binding proteins  
1 0.856795618 0.735293505 0.900768385 0.575455316 1 1.033028153  
0.956793053 0.772083951 0.698809128 1 0.888172426 1.029343101  
0.850925705 0.901925935 1 1.230080452 1.149610245 1.147644916  
1.11260768 1 1.210865385 0.759423928 1.156395966 1.30248035 1  
1.037203849 1.023753201 1.299827175 0.975237675 1.025380989 1  
0.947773108 0.974109474 1.040654463 0.813823624 0.640227656 1  
1.337810244 1.315790529 1.426410924 0.881633709 1.254759704 1.081395653  
YER138c YER138c 1 1.208193717 0.917823097 1.471940051 0.840801867 1  
1.206708267 1.253374983 0.98020999 0.855149455 1 1.533938228  
1.415713735 0.694431272 1.369704023 1 0.977807117 1.690417117  
1.180580732 0.737713369 1 0.409064906 0.291104737 0.327828934  
0.642145408 1 0.916748528 0.779279789 1.164054819 1.187207128  
0.881811034 1 1.006721507 1.232175626 2.576990111 4.333452364  
1.68887426 1 1.29426728 2.042772341 2.673944467 1.010097317  
1.140144795 0.909773366  
YER140w YER140w::YER140W::molecular\_function unknown 1.076144854  
0.926997864 1.101373826 0.826249818 0.991838943  
1.024674529 1.044077308 0.860981649 0.712825277 1.109194553 1  
0.740577999 0.506420124 0.680172067 1 1.981310624 1.350142338  
1.383749543 1.252573914 1 1.05206139 0.921590802 1.158797311  
1.120923177 1.12380431 1 0.846472725 0.745777473 0.803333734  
0.744336207 1 1.150439067 0.836151783 1.310706774 0.631753889  
0.834672004 0.825713448  
YER142c YER142c::MAG1::3-methyladenine DNA glycosylase 0.780635962  
0.903082654 0.907934526 1.128751254 0.761547922 0.77545766  
0.982547597 0.936776076 1.365512656 1.751680379 0.940808454 1  
2.492722431 3.028393224 3.094266117 1 2.520757441 4.204736203  
3.007240987 1.626719496 1 1.124863529 2.254892928 1.348755049  
0.745585068 1.13305093 1 1.515410846 3.147232484 2.396065961  
1.259189399 1.618031746 1 2.053291461 1.454917777  
1.718940787 1.416759659  
YER144c YER144c::UBP5::Putative Ubiquitin-specific protease 1  
0.713733145 0.692899023 0.802732203 0.610068284 1 0.811421456  
0.948101999 0.658323139 0.625181094 1 0.994143672 0.862525865  
0.7798845 0.720005183 1 0.952580772 0.758258897 0.757533652 1  
1.006887147 1.043184474 0.630162339 1.093296964 1 1.166114834  
1.346006448 0.767727864 1.006423798 1.0280134 1 0.926876632  
0.93549004 1.362768431 1.035879365 0.781334828 1 1.025772368  
0.923787862 0.927509392 0.607303897 0.869632429 0.881753341  
YER146w YER146w::LSM5::Like Sm-E protein 1 0.981535236  
1.146533935 2.073078975 1 1.056435891 1.848931573 1.799682355 1  
1.285376195 1.360455128 0.840097317 1.674137246 1 0.798058679  
0.553545275 0.573576451 0.794951987 1 2.133788073 2.127979548

|         |                                                                                         |             |             |             |             |             |             |             |
|---------|-----------------------------------------------------------------------------------------|-------------|-------------|-------------|-------------|-------------|-------------|-------------|
|         | 1.55680562                                                                              | 1.354397495 | 1           | 0.92695565  | 1.411966632 | 1.067957605 |             |             |
|         | 1.213329315                                                                             | 1.237674277 | 1           | 1.37914519  | 1.840679463 | 1.96796899  |             |             |
|         | 1.98195205                                                                              | 1.574636864 | 1           | 0.914423132 | 1.16280003  | 0.911932322 |             |             |
|         | 0.971374326                                                                             | 0.872976844 | 0.773176006 |             |             |             |             |             |
| YER160c | YER160c                                                                                 | 1           | 1.05249702  | 0.78238196  | 1.397599233 | 0.750316811 | 1           |             |
|         | 1.096225382                                                                             | 1.113365064 | 0.964210184 | 0.781110664 | 1           | 1.408801076 |             |             |
|         | 1.277963629                                                                             | 0.568470278 | 1.515243257 |             | 1.794420423 | 0.425669943 |             |             |
|         | 1.838723345                                                                             | 1.009469503 | 1           | 0.44590645  |             | 0.251614985 | 0.838559693 | 1           |
|         | 0.957849177                                                                             | 0.80470476  | 1.40933128  | 1.273260704 | 0.821130658 | 1           |             |             |
|         | 1.08301969                                                                              | 1.322822842 | 2.924567545 | 4.718266639 | 1.958478442 | 1           |             |             |
|         | 1.207008156                                                                             | 1.837380758 | 2.299126753 | 0.915108669 | 1.039974675 | 0.992957567 |             |             |
| YER160c | YER160c                                                                                 |             |             |             |             |             |             |             |
|         |                                                                                         | 1           | 0.975558235 | 0.784940076 | 1.10509095  |             | 0.926114389 |             |
|         | 0.968336097                                                                             | 0.85922032  | 0.977397425 |             | 1.222411837 | 1           | 1.31081329  |             |
|         | 1.587361006                                                                             | 0.783794686 | 1.451297753 | 0.778163133 |             |             |             |             |
| YER162c | YER162c::RAD4::Nucleotide excision repair protein                                       |             |             |             |             | 1           |             |             |
|         | 1.010689186                                                                             | 1.152601376 | 1.270434028 | 1.171371642 | 1           | 1.342544172 |             |             |
|         | 1.089167337                                                                             | 1.306322069 | 1.311856774 | 1           | 1.272382083 | 1.404077529 |             |             |
|         | 0.573394551                                                                             | 1.139073477 | 1           | 1.233333977 | 1.469220214 | 0.911414309 |             |             |
|         | 1.187103471                                                                             |             | 0.895244416 | 0.854319314 |             | 1           | 0.882223513 |             |
|         | 1.129439412                                                                             | 1.092428008 | 0.874876856 | 0.931353301 | 1           | 1.249284174 |             |             |
|         | 1.08582539                                                                              | 1.834793225 | 1.195584621 | 1.088947734 | 1           | 1.271215722 |             |             |
|         | 1.043789154                                                                             | 0.894963649 | 0.449882956 | 1.452042703 | 1.092778775 |             |             |             |
| YPL106C | "YPL106C::SSE1::HSP70 family member, highly homologous to Ssalp and Sse2p"              |             |             |             |             |             |             |             |
|         | 1                                                                                       | 0.811050345 | 0.643087932 | 0.994383384 | 0.533621785 | 1           |             |             |
|         | 1.02595246                                                                              | 0.864641294 | 0.550183146 | 0.711406241 | 1           | 0.886285998 |             |             |
|         | 0.801871336                                                                             | 0.662257426 | 0.74682095  | 1           | 1.212866289 | 1.018861567 |             |             |
|         | 1.273881866                                                                             | 1.133125999 | 1           | 0.710591142 | 0.534622306 | 0.435790426 |             |             |
|         | 0.766990772                                                                             | 1           | 1.097637703 | 0.97199239  | 0.911792007 | 1.477986173 |             |             |
|         | 0.75951766                                                                              | 1           | 1.975099872 | 1.128641233 | 0.898701185 | 0.616371495 |             |             |
|         | 0.481392949                                                                             | 1           | 1.030927522 | 0.898676445 | 0.824612232 | 0.619123015 |             |             |
|         | 0.442487908                                                                             | 0.654966775 |             |             |             |             |             |             |
| YPL120W | YPL120W::VPS30::Required for sorting and delivery of soluble hydrolases to the vacuole. |             |             |             |             |             |             |             |
|         | 1                                                                                       | 0.64362172  | 0.840508354 | 0.923827881 |             |             |             |             |
|         | 0.950900064                                                                             | 1           | 0.801011991 | 0.925494333 | 0.812509524 | 0.818767161 | 1           |             |
|         | 0.780709446                                                                             | 0.916811611 | 0.802292071 | 0.981471092 | 1           | 0.925914357 |             |             |
|         | 0.609889036                                                                             | 1.133636389 | 1.368203715 | 1           | 1.074661813 | 2.463577171 |             |             |
|         | 2.058012176                                                                             | 1.093087631 | 1           | 1.097701996 | 1.307112573 | 0.95980764  |             |             |
|         | 0.837625602                                                                             | 1.044917119 | 1           | 1.146699495 | 1.332042598 | 1.222832189 |             |             |
|         | 1.175279869                                                                             | 1.431623478 | 1           | 1.373456697 | 1.340988771 | 1.270396968 |             |             |
|         | 1.363977825                                                                             | 1.287412724 | 1.052500067 |             |             |             |             |             |
| YPL122C | YPL122C::TFB2::Transcription/repair factor TFIIH subunit                                |             |             |             |             |             | 1           |             |
|         | 0.727431048                                                                             | 0.729088023 | 0.933459132 | 1.074321163 | 1           | 0.860212074 |             |             |
|         | 0.832134503                                                                             | 0.735714498 | 0.966435561 | 1           | 0.628477392 | 0.597931831 |             |             |
|         | 0.677741825                                                                             | 0.861893827 | 1           | 0.783578264 | 0.552135107 | 0.802772632 |             | 1           |
|         | 0.646363213                                                                             | 1.479374312 |             | 0.985554702 | 1           | 0.993795847 | 0.966689806 |             |
|         | 1.059207998                                                                             | 0.868345708 | 1.029663019 | 1           | 0.920086517 | 0.858970526 |             |             |
|         | 0.962154683                                                                             | 0.784439209 | 0.668472772 | 1           | 0.92508155  | 0.874274228 |             |             |
|         | 0.918548153                                                                             | 0.965263855 | 0.696846917 | 0.868618994 |             |             |             |             |
| YPL124W | YPL124W::SPC29::spindle pole body component                                             |             |             |             |             |             | 1           | 0.996543904 |
|         | 1.434450166                                                                             | 1.049464518 | 1.681870101 | 1           | 1.082012095 | 1.195263222 |             |             |
|         | 1.520222368                                                                             | 1           | 0.949540479 | 1.090583331 | 1.977396531 | 1.416901305 | 1           |             |
|         | 1.064723316                                                                             | 0.912661654 | 0.774447362 | 1.151578346 | 1           | 1.00835458  |             |             |
|         | 1.431861664                                                                             | 0.826290457 | 0.630225926 | 1           | 0.991732397 | 1.090103383 |             |             |
|         | 0.768071122                                                                             | 0.689624877 | 1.165559912 | 1           | 1.420310554 | 1.46542708  |             |             |

|         |                                                                                                                                                                                                               |             |             |             |             |             |
|---------|---------------------------------------------------------------------------------------------------------------------------------------------------------------------------------------------------------------|-------------|-------------|-------------|-------------|-------------|
|         | 1.550692908                                                                                                                                                                                                   | 1.5689421   | 2.202766394 | 1           | 1.236585487 | 1.307300587 |
|         | 1.342746201                                                                                                                                                                                                   | 1.522564896 | 1.866046057 | 1.593635726 |             |             |
| YGR022C | YGR022C::YGR022C::molecular_function unknown                                                                                                                                                                  |             |             |             | 1           | 1.617451242 |
|         | 2.172444442                                                                                                                                                                                                   | 1.638955087 | 1           | 2.011209014 | 1.687593101 | 1           |
|         | 2.145206657                                                                                                                                                                                                   | 2.236882937 | 1.805665368 | 1           | 0.735573646 |             |
|         | 1.404387887                                                                                                                                                                                                   | 0.635976337 | 1           | 0.793799434 | 0.74663232  | 1           |
|         | 1.780748138                                                                                                                                                                                                   | 1.209666573 |             | 1           |             |             |
|         | 1                                                                                                                                                                                                             | 0.842183209 |             |             |             |             |
| YPL126W | YPL126W::NAN1::part of small (ribosomal) subunit (SSU) processosome (contains U3 snoRNA); Net1-Associated Nucleolar protein 1                                                                                 |             |             |             | 1           | 0.694563342 |
|         | 0.512583259                                                                                                                                                                                                   | 0.748347998 | 0.562586269 | 1           | 0.680120406 | 0.579576924 |
|         | 0.632188629                                                                                                                                                                                                   | 0.699656961 | 1           | 0.427182456 | 0.274709132 | 0.213547731 |
|         | 0.773140485                                                                                                                                                                                                   | 1           | 0.224517978 | 0.216412151 | 0.185243963 | 0.397861763 |
|         | 0.311033017                                                                                                                                                                                                   | 0.491271513 | 0.259644626 | 0.458199554 | 1           | 0.687386188 |
|         | 0.386447848                                                                                                                                                                                                   | 0.605135287 | 0.817423661 | 0.675805456 | 1           | 0.738358352 |
|         | 0.473026265                                                                                                                                                                                                   | 0.453584166 | 0.817868713 | 0.569333837 | 1           | 0.617826327 |
|         | 0.540884736                                                                                                                                                                                                   | 0.967386572 | 0.754842601 | 0.381483202 |             |             |
| YGR024C | YGR024C::YGR024C::molecular_function unknown                                                                                                                                                                  |             |             |             | 1           | 1.215228546 |
|         | 1.214844966                                                                                                                                                                                                   | 0.919854589 | 1.561316855 | 1           | 0.879508234 | 0.864925282 |
|         | 1.374561741                                                                                                                                                                                                   | 1.218504396 | 1           | 0.80081804  | 1.010407491 | 1.035387356 |
|         | 0.961625428                                                                                                                                                                                                   | 1           | 2.018469949 | 1.415162689 | 1.168183052 | 2.207083629 |
|         | 1.971688222                                                                                                                                                                                                   | 1.762349845 | 1.992076877 | 1.235152729 | 1           | 0.763265477 |
|         | 0.679423234                                                                                                                                                                                                   | 0.452022793 | 0.526048447 | 0.796140473 | 1           | 0.903649038 |
|         | 1.529141341                                                                                                                                                                                                   | 1.06114309  | 1.179676578 | 2.242600858 | 1           | 1.242640735 |
|         | 1.482158314                                                                                                                                                                                                   | 1.079393283 | 1.917581769 | 1.483921204 | 1.415008433 |             |
| YPL128C | YPL128C::TBF1::TTAGGG repeat binding factor                                                                                                                                                                   |             |             |             | 1           | 0.978576065 |
|         | 0.878192627                                                                                                                                                                                                   | 0.979707084 | 0.70948695  | 1           | 1.090403319 | 0.960601281 |
|         | 0.74122749                                                                                                                                                                                                    | 0.746616559 | 1           | 1.031817655 | 0.938818131 | 0.677514696 |
|         | 0.908799607                                                                                                                                                                                                   | 1           | 0.533796579 | 0.492468072 | 0.532620665 | 0.445664401 |
|         | 0.268184211                                                                                                                                                                                                   | 0.419070187 | 0.308369029 | 0.346338031 | 1           | 0.933553528 |
|         | 1.139046209                                                                                                                                                                                                   | 0.670095862 | 1           | 0.644879486 | 0.520552865 | 0.733489108 |
|         | 0.875258296                                                                                                                                                                                                   | 0.515020034 | 1           | 0.685315038 | 0.869489695 | 0.596021298 |
|         | 0.695117383                                                                                                                                                                                                   | 0.518369415 |             |             |             |             |
| YGR026W | YGR026W::YGR026W::molecular_function unknown                                                                                                                                                                  |             |             |             | 1           | 1.376118312 |
|         | 1.276909441                                                                                                                                                                                                   | 1.209051404 | 1.661926171 | 1           | 1.142033449 | 1.286099809 |
|         | 1.389383069                                                                                                                                                                                                   | 1.402771135 | 1           | 1.191241202 | 1.174447498 | 1.664007796 |
|         | 1.120222796                                                                                                                                                                                                   | 1           | 1.916974067 | 1.644117301 | 2.038238072 | 1.335601566 |
|         | 1.085100963                                                                                                                                                                                                   | 0.736585098 | 1.161034047 | 1.116384353 | 1           | 0.964841252 |
|         | 1.149482042                                                                                                                                                                                                   | 0.821072174 | 1.02916027  | 0.893531921 | 1           | 0.936204452 |
|         | 1.119772333                                                                                                                                                                                                   | 0.8182434   | 0.815122488 | 0.938336195 | 1           | 1.307529791 |
|         | 1.108558915                                                                                                                                                                                                   | 1.016100765 | 1.295998119 | 1.642214845 | 0.814330326 |             |
| YPL130W | YPL130W::SPO19::sporulation-defective; SPO19 was found as a weak high-copy suppressor of the spo1-1 ts mutation. The gene is specifically induced late in meiosis (Primig et al. (2000) Nat Genet 26:415-423) |             |             |             | 1           |             |
|         | 1                                                                                                                                                                                                             |             | 1.936485059 | 1.952615831 | 1           |             |
|         | 1.66080783                                                                                                                                                                                                    |             | 0.313651304 | 0.537953    | 0.336948262 | 1           |
|         | 0.989903914                                                                                                                                                                                                   | 1.955561182 | 0.262760358 | 1.223803343 | 1           | 0.953087785 |
|         | 0.849925446                                                                                                                                                                                                   | 0.978146349 | 1.053527605 | 1           | 0.983871701 | 0.826596388 |
|         | 0.872408036                                                                                                                                                                                                   | 0.817812326 | 1           | 1.030706006 | 1.125626706 | 0.964225881 |
|         | 0.964501462                                                                                                                                                                                                   | 1.06063732  |             |             |             |             |
| YGR028W | YGR028W::MSP1::40 kDa putative membrane-spanning ATPase                                                                                                                                                       |             |             |             | 1           |             |
|         | 1.045637197                                                                                                                                                                                                   | 1.201734779 | 1.35971818  | 1.42905874  | 1           | 1.218299698 |
|         | 1.265312433                                                                                                                                                                                                   | 1.627883067 | 1.2950269   | 1           | 1.014762979 | 1.078948054 |
|         | 1.27863454                                                                                                                                                                                                    | 1.336849124 | 1           | 2.48164076  | 1.642434694 | 1.747415221 |
|         | 2.114641627                                                                                                                                                                                                   | 1           | 2.301889907 | 1.619818872 | 1           | 1.074064084 |
|         | 1.465743254                                                                                                                                                                                                   | 1.156169099 | 0.973097162 | 1.084028909 | 1           | 1.17391948  |

1.286504481 1.151066925 1.109409111 1.452607112 1 1.455218216  
1.392334138 1.164051548 1.443829773 1.875042128 1.252142274  
YPL144W YPL144W::YPL144W::molecular\_function unknown 1 1.555952147  
2.059021475 1.476018847 2.649303809 1 1.384036404 2.179231136  
2.057130664 1 1.223513831 1.256418427 1.624362196 1.594943973 1  
0.712261234 0.393906919 0.301424883 0.710557955 1 1.087661915  
0.961786765 0.967163458 0.900490033 1 1.261238581 1.178798447  
0.952831969 1.136391272 1.073248307 1 0.967456991 1.291853669  
1.222429687 1.423204065 1.644375331 1 1.153494746 1.021617865  
1.393293019 1.562566706 1.800282939  
YGR030C YGR030C::POP6::Processing Of Precursors - a group of proteins that  
appear to be components of both RNase P and RNase MRP 1 1.120632718  
1.343238717 0.952293448 1.537350854 1 0.950649982 0.868732325  
1.75873888 1.370538395 1 0.76008288 0.825657781 1.121146062  
1.015569999 0.364840662 0.506867121 0.35397307 0.606506879 1  
0.900550493 1.30547079 0.592217003 0.990579837 1 0.800783159  
0.760513831 0.528945855 0.711822846 0.943594512 1 0.67951707  
1.065131041 1.12292802 2.5820479 1 0.719493849 1.042203472  
0.972346777 1.605283189 1.358091762 1.428142781  
YPL146C YPL146C::YPL146C::molecular\_function unknown 1 0.765503577  
0.942610566 0.936913249 1.256331479 1 0.830240958 0.820064989  
1.09568683 1 0.711516513 0.591833989 0.690726013 0.953850273 1  
0.430959441 0.320525097 0.347202871 0.827376749 1 0.468067902  
0.777026509 0.512068086 0.737903428 1 0.620186087 0.574091947  
0.443028098 0.526877306 0.862718318 1 0.864558398 0.890831534  
0.707636037 1.288749259 1.500400113 1 0.75108805 0.903834394  
1.059406155 1.194304093 0.749939395 0.806449707  
YGR032W "YGR032W::GSC2::Highly similar to FKS1 (GSC1). GSC2 and FKS1 encode  
redundant catalytic components of 1,3-beta-glucan synthase. Deletion of both is  
lethal" 1 1.523500508 1.292987955 1.725481861 1.298799574 1  
1.624873604 1.596811819 1.287858498 1.228537319 1 1.562472306  
1.525876558 0.91061975 1.837497145 1 1.300866404 0.846013602  
0.818837217 1 0.725100949  
0.883024937 0.779522239 1 1  
1.567853847 1.079197234 1.584645475 2.165418195  
YGR032W "YGR032W::GSC2::Highly similar to FKS1 (GSC1). GSC2 and FKS1 encode  
redundant catalytic components of 1,3-beta-glucan synthase. Deletion of both is  
lethal"  
1 0.932129795 0.710234236 1.432688437 1.453819272 1.078798057 1  
0.714246477 0.618249574 0.749964764 2.630612854 0.613457873 1  
0.918768279 0.798227855 1.23203694 0.964175192 0.861596899 0.603304945  
YPL148C YPL148C::PPT2::Phosphopantetheine:protein transferase (PPTase) that  
activates the low molecular weight acyl carrier protein (ACP) of mitochondrial  
type II fatty acid synthase (FAS). 1 1.355684767 1.416754207 1.200938743  
1.463585125 1 1.189288524 1.198977983 1.886127435 1.85739267 1  
1.07040943 1.097501423 1.378078498 1.405493093 1 0.667242056  
0.538197454 0.681849124 1.750038173 1 0.921039125 1.796700362  
2.224210975 1.38146359 1 1.166409743 1.142323919 1.25596186  
0.974356028 1.050078373 1 0.601734082 0.929972043 0.852039053  
0.894589279 0.90790281 1 1.097665925 1.096346457 1.106297063  
1.275831092 1.850193439  
YGR046W YGR046W::YGR046W::molecular\_function unknown 1 0.901745038  
0.959553692 0.923334784 1.118417181 1 1.033715874 0.998331234  
0.902288143 0.803245515 1 0.866063067 0.884302649 0.745559629  
1.000468784 1 0.91294322 0.849523124 0.829639121 1  
1.333751729 0.919385159 1.116360339 1.1669044 1 0.891774044

0.955335793 0.78157749 1.18417014 1.164945951 1 0.810882535  
 0.487426984 0.477462777 0.76932397 1.290158505 1 0.91896976  
 0.605317032 1.119510655 1.153726769 1.472140582 1.041116945  
 YGR048W YGR048W::UFD1::Ubiquitin fusion degradation protein  
 0.807724294 1.03974082 1.086837915 0.804712544 1.053333366  
 1.042364519 1.279930707 0.920596282 0.937981693 1.438495135  
 1.471224528 1.029896473 1 1.956628794 1.489540342 1.609163075  
 1.880286459 1 1.476978701 1.224548707 1.430296544 1.080168163 1  
 1.063287515 1.737293757 1.633600505 0.835201511 0.937779253 1  
 1.326559304 1.545338226 1.531103656 1.131815965 0.967655971 1  
 1.77094644 2.031594814 1.575594131 1.146367658 1.563616923 1.14706739  
 YGR050C YGR050C::molecular\_function unknown 1 1.286133066  
 1.279049733 1.007784161 1.446994535 1 1.138806349 1.105537105  
 1.629222756 1.17641795 1 1.120258189 1.124943825 1.583544788  
 1.135529219 1 1.070680417 0.795142544 0.98354428 1  
 1.66696306 2.629537367 1.651325516 0.954187067 1 0.897080934  
 0.603842319 0.866375473 0.883036997 1 1.143615329 0.73246921  
 0.685219014 1 1.334843328 1.331074592 0.906900157 1.450436944  
 1.195972951 1.17596308  
 YER164w "YER164w::CHD1::Sole S. cerevesiae member of CHD gene family  
 containing Chromodomain, Helicase domain, and DNA-binding domain" 1  
 0.781084534 0.728011248 1.111499025 0.69064796 1 1.022407237  
 1.064915389 0.783113345 0.722182499 1 1.073296348 0.89319609  
 0.960055448 0.785898224 1 0.7811331 0.608524185 0.373697043 1  
 0.758793919 0.953599483 0.694587125 0.84905276 1 0.903996421  
 0.847431694 0.845987213 0.88924878 0.914112886 1 0.962120427  
 0.630969173 0.86392055 0.956893447 0.655305418 1 0.870819329  
 0.819087437 0.907782085 0.68485056 0.772936532 0.819584055  
 YGR052W YGR052W::molecular\_function unknown 1 1.432243454  
 1.495022683 1.521469079 1.424497483 1 1.367890136 1.477030385  
 1.323801327 1.065190215 1 1.304355814 1.915406544 2.148384444  
 1.35344249 1 4.695230234 3.230445525 3.919199846 1.610400338 1  
 2.962439401 1.695961259 1.696329775 1.068563423 1 1.934000157  
 1.528487907 1.187948553 0.990750679 0.931394639 1 1.419482398  
 1.449070809 1.386959294 1.156361587 1.226439296 1 1.466245118  
 1.708135961 0.94783412 2.06001705 0.867743381  
 YER166w YER166w::DNF1::Drs2 Neol Family 1 1.544834946 1.001524164  
 1.397907729 1.263108374 1 1.341280454 1.44324326 1.410867352  
 1.345066997 1 1.244447024 1.316084754 0.847450848 1.316853679  
 0.581912968 1 1.081216219  
 1.136805975 0.635242193 0.97227223 0.921824156 1 1.141078389  
 0.915597492 1.000348006 0.906570269 1.116697466 1 0.992898044  
 0.783882039 0.742502003 0.736519679 0.735046738 1.179465531  
 YER166w YER166w::DNF1::Drs2 Neol Family  
 0.601444558  
 0.41910993 2.079886514  
 0.834152812  
 YER168c YER168c::CCA1::tRNA nucleotidyltransferase (tRNA CCA-  
 pyrophosphorylase) 1.031818505 0.95319068 1.137154437 1.051412707  
 0.950421512 1.056643498 1.08538676 0.995852002 0.929733252  
 0.842536104 1.216883357 1 0.871027849 0.65246277 1.015863571 1  
 1.400290862 1.295838247 1.226711011 1 0.987879699 0.874541202  
 0.943902108 0.916422787 0.947276489 1 1.066594577 1.074962452  
 1.104403285 0.888407466 0.842787385 1 1.108665287 1.077593756  
 1.069936701 0.628651966 0.771247048

YER170w YER170w::ADK2::Adenylate kinase (mitochondrial GTP:AMP  
phosphotransferase) 1 0.897999305 1.144596604 1.031882558 1  
0.898474 0.967130459 1.376845719 1.088329736 1 1.111626241  
1.020290456 1.168274713 1.211183794 1 0.989587989 0.830431555  
1.787246842 1 2.956739405 2.07418728 2.408636407 1.430528175 1  
1.105241628 1.273514021 1.208868552 0.893594685 1.218775279 1  
0.95195643 1.306036277 1.01345927 1.118965569 1 1.996343738  
1.650230572 0.500253968 2.215464559 1.200480549  
YER184c YER184c::YER184C::molecular\_function unknown 1.09338287  
1.046573776 1.199770607 0.864429643 1.163509639 1.263139274  
1.100255102 1.236471204 0.870581676 1.334362042 1  
0.814060799 0.613817797 0.649644107 0.831821312 1 1.637297502  
1.511780862 0.900728739 0.836550776 1 1.070334232 0.991048129  
0.954503694 0.944639784 0.964332851 1 0.988314661 0.924410721  
1.1227221 0.9396833 0.827503413 1 1.207389315 1.106104784  
1.241802154 0.101882893 1.122956298 0.950927634  
YER186c YER186c::YER186C::molecular\_function unknown 1 1.061362969  
0.90487768 1.039039706 1 0.91653858 0.819854353 1.256976535  
1.169467386 1 0.733860438 0.742640461 0.751815557 0.982487797 1  
0.838677461 0.478862521 0.57367431 1.28916075 0.784648587  
0.67428604 0.774175336 0.482687502 1 1.053231189 0.962387283  
1.134208093 1.002964108 1.203402657 1 0.870415433 1.099388812  
0.936946344 0.716337484 1.154826571 1 1.196615912 1.083464191  
0.955423957 0.868936564 1.241675824 1.125176811  
YER188w YER188w::YER188W::molecular\_function unknown 1 1.13212277  
1.114395373 1.281813666 0.984584833 1 1.061708069 1.218915614  
1.448457301 1.284205827 1 1.229130178 1.309721217 1  
0.56703506 0.880484527 1.209286961 1 1.790886439  
1.558230047 0.849899776 0.616280964 0.983047188 0.956872  
0.5433985 0.8847779 2.419387235 1.830791232 1  
1.165640701 1.637881991 2.596275408 1.018350701  
YER190w YER190w::YRF1-2::Y'-helicase protein 1 1 0.866758536  
0.687915618 0.900571291 0.435369153 1 1.017368507 1.101462686  
0.57950645 1 0.878326839 0.94329573 0.445578462 0.845145626 1  
0.760628577 0.806593745 0.753525189 0.381711317 1 0.578542447  
0.401495132 0.469591806 0.816966122 1 0.80137035 0.838261907  
1.405511339 1.146565517 1.118923737 1 0.714309712 0.571873192  
0.687854093 0.85718834 0.5214615 1 1.079289441 0.924270722  
1.45983504 0.866659846 1.182019954 0.638329872  
YFLTyB YFLTyB 1 0.753736013 0.654982653 1.128930805 0.688409714 1  
0.95892543 0.973199816 0.713014207 1 1.118202079 1.240946939  
0.397892301 1.144957487 1 1.106776612 1.291519346 0.977592235  
0.707977942 1 0.419300719 0.272020289 0.362346872 0.647862895 1  
0.953709151 1.115172197 1.327980409 1.158117493 1.068287871 1  
1.055868017 1.721727015 1.946078805 2.991404376 1.539826006 1  
1.343818317 1.989844541 2.495889006 1.367283931 1.548514922 0.856360259  
YFL002C YFL002C::SPB4::involved in the maturation of 25S ribosomal RNA  
1.147559461 0.895110963 1.033791258 1.231310328 1.064332138  
1.195131973 1.328235905 0.99705769 0.664246298 0.53754037  
1.304013365 1 0.38373782 0.58466933 1 0.88740357  
0.997654047 0.928334244 1.078009884 1 0.871197496 0.752837286  
0.695908208 0.788570473 0.870939446 1 0.771420966 0.758940831  
0.741570947 0.867762416 0.996191684 1 0.699477623 0.54958332  
0.815655824 0.666548329 0.554938969 0.735524137  
YPL150W YPL150W::YPL150W::molecular\_function unknown 1 0.836682461  
0.842160101 1.229305624 0.877182924 1 1.028106589 1.13036608  
0.921460172 1.013813398 1 0.404539707 1.110326893 0.698774877

|             |                                                    |             |             |             |             |
|-------------|----------------------------------------------------|-------------|-------------|-------------|-------------|
| 1.133204068 | 1                                                  | 1.094648636 | 1.07741321  | 0.609931658 | 1           |
| 1.097381887 | 0.85168839                                         | 1.082155116 | 1           | 1.14880734  | 1.239722898 |
| 1.303911776 | 1.222367935                                        | 1.028751601 | 1           | 1.093904174 | 0.883207303 |
| 0.970879303 | 0.988822149                                        | 0.813657301 | 1           | 1.008849557 | 0.901336499 |
| 0.996376477 | 0.889532274                                        | 0.82512194  | 0.789812857 |             |             |
| YPL152W     | YPL152W::RRD2::Resistant to Rapamycin Deletion 2   |             |             |             | 1           |
| 1.642523117 | 1.484767367                                        | 1.530706439 | 1           | 1.472645639 | 1.580491684 |
| 1.510493029 | 1.50903536                                         | 1           | 1.499034972 | 1.456389762 | 1.610877731 |
| 1.439825274 | 0.920478145                                        |             |             | 0.994341163 | 0.493606802 |
| 0.930358227 | 0.278654665                                        | 1           | 1.223634922 | 1.245466754 | 1.425328059 |
| 1.083082168 | 1.043568703                                        | 1           | 1.269979389 | 1.15678564  | 1.184855779 |
| 0.940242823 | 1.168579997                                        | 1           | 1.090556356 | 1.00155971  | 1.122354158 |
| 1.142134023 | 1.066366267                                        | 1.218868573 |             |             |             |
| YPL154C     | YPL154C::PEP4::vacuolar proteinase A               |             |             |             | 1           |
| 0.815537767 | 1.107954326                                        | 1.081644086 | 1           | 1.046339512 | 0.885596393 |
| 1.187894681 | 1                                                  | 1.254551257 | 1.609729605 | 1.789815243 | 1.171328208 |
| 2.449976574 | 2.175334811                                        | 3.02686931  | 1.458197868 | 1           | 1.289383886 |
| 0.686750599 | 0.858279213                                        | 1.094986171 | 1           | 1.47041033  | 1.722309543 |
| 2.571192223 | 1.531141284                                        | 1.061418269 | 1           | 1.518227146 | 1.59560529  |
| 2.25573308  | 1.576627596                                        | 0.619845203 | 1           | 1.327168589 | 1.40786019  |
| 1.592334734 | 0.836100832                                        | 1.834980661 | 0.914151482 |             |             |
| YNL203C     | YNL203C::YNL203C::molecular_function unknown       |             |             |             | 1           |
| 1.253926841 | 1.763707617                                        | 1.417734484 | 1           | 1.647812038 | 1.663373467 |
| 1.578698453 | 1.818351363                                        | 1           | 1.506161691 | 2.0205808   | 1.869803887 |
| 1.014593505 | 1.928694654                                        | 2.28305323  |             | 0.593725159 |             |
| 1           | 0.869824524                                        | 0.720351004 | 1.313039044 | 1.106678555 | 1           |
| 0.86798597  | 0.562906312                                        | 1.118707776 | 1.482918717 |             | 0.873796237 |
| 0.706178392 | 1.28668066                                         | 0.591932165 | 1.781113574 |             |             |
| YPL168W     | YPL168W::YPL168W::molecular_function unknown       |             |             |             | 1           |
| 1.072742481 | 1.156293963                                        | 1.01767455  | 1           | 1.17329028  | 1.083468234 |
| 1.143256722 | 1.058346801                                        | 1           | 1.163124321 | 1.132431999 | 1.12381584  |
| 1.650301696 | 1.245582575                                        | 1.507549205 | 1           | 1.564661867 | 1.297381214 |
| 0.935248692 | 0.994066679                                        | 1           | 1.107432265 | 1.145727697 | 1.148621218 |
| 0.937825994 | 1.005228799                                        | 1           | 1.125864092 | 1.140294981 | 1.083628464 |
| 0.980005089 | 1.184071085                                        | 1           | 1.129805476 | 1.123928139 | 1.153372082 |
| 1.227685229 | 1.317211206                                        | 1.142689274 |             |             |             |
| YNL205C     | YNL205C::YNL205C::molecular_function unknown       |             |             |             | 1           |
| 1.515420092 | 1.481738365                                        | 1           | 1.338159601 | 1.206684575 | 1.467961434 |
| 1.667712703 | 1                                                  | 0.918818474 | 1.008669676 | 1.4563077   | 1.216144038 |
| 0.783995659 |                                                    | 1.372694161 |             | 0.331787591 | 0.563582385 |
| 0.288090494 | 1                                                  | 0.792603457 | 0.654935081 | 0.904885095 | 0.965876586 |
| 0.887876586 | 1                                                  | 0.782099079 | 0.758643879 | 0.696447718 | 0.836571189 |
| 0.691297271 | 1                                                  | 1.000799384 | 1.229332836 | 1.006381527 |             |
| YPL170W     | YPL170W::YPL170W::molecular_function unknown       |             |             |             | 1           |
| 1.590982392 | 1.818980187                                        | 1           | 1.416136498 |             | 2.030593695 |
| 1.962546501 | 1                                                  | 0.869389433 | 1.411786105 | 1.972882066 | 1.564385503 |
| 0.871772439 | 1.364059244                                        | 1.134514908 | 1.200836883 | 1           | 0.803363345 |
| 0.699873824 | 1.179088465                                        | 0.812514123 | 1           | 0.852198818 | 0.915459185 |
| 1.092066295 | 1.271056562                                        | 1.083629695 | 1           | 0.984199288 | 0.833181379 |
| 1.286995646 | 1.481912369                                        | 1.432731117 | 1           | 0.725495731 | 0.87808048  |
| 1.356546841 | 1.130804827                                        | 1.390394877 | 1.333575354 |             |             |
| YNL207W     | YNL207W::RIO2::Protein required for cell viability |             |             |             |             |
| 1.028124619 | 0.883335364                                        |             |             |             |             |
| 0.906463462 | 1                                                  | 1.247602415 |             | 1.431279408 | 0.720630686 |
| 0.861849952 | 0.820838212                                        | 0.889342758 | 0.911375144 | 1           | 0.885134184 |
| 0.7391733   | 0.837213551                                        | 1.091252063 | 0.933066634 | 1           | 0.909413464 |



0.855712439 0.543716328 0.96237472 1.158858647 1 0.87200155  
 0.842065141 0.963182658 1.369909773 0.630856445 0.78018096  
 YPL172C YPL172C::COX10::Required for an essential posttranslational stage in  
 assembly of cytochrome oxidase 1 0.863230106 0.825336024 1.095584027  
 0.79631414 1 1.076218826 0.82930967 0.960754204 1  
 0.877831634 0.737076606 0.691927274 0.798811206 1 0.920269231  
 0.928601399 1 1.357940753 1.858791041 0.963742791 1.562809048 1  
 0.962837357 1.155620554 1.119800913 1.000361893 1 1.04512973  
 0.711972527 0.809613519 0.793543026 0.785332856 1 0.903826972  
 0.601063498 0.824742924 0.832076664 1.036363299 0.712757945  
 YNL221C YNL221C::POP1::Required for processing of pre-tRNAs and the 5.8S  
 rRNA precursor 1 0.895228584 0.779291639 1.064762855 1  
 0.941572833 1.0114292 0.811850553 0.754858402 1 0.912354248  
 0.864121818 0.467141414 1.015135187 1 0.766667546  
 0.57981518 1 0.987314093 0.832805838 0.620587213 1  
 0.86293725 0.891184006 1.026833784 1.199295424 1.147521475 1  
 0.79787487 0.635386398 0.599103634 0.990146299 0.773435295 1  
 0.842945895 0.759978032 1.145879214 1.061436904 1.002715009 0.93253961  
 YPL174C YPL174C::NIP100::Nuclear import protein 1 0.712176418  
 0.907875105 0.930275228 1.040312819 1 0.982658157 0.886817587  
 0.895594816 0.840648312 1 0.815946301 0.831559145 0.636256481  
 0.981384593 0.582628204 0.355545146 0.605735103 0.866438363 1  
 1.076691514 1.814721468 1.440651571 1 0.870069508 0.907468141  
 0.669856008 0.718402005 1.13194809 1 0.907400579 1.001223474  
 0.995406024 0.947067654 1.162774298 1 1.048910314 1.2472348  
 1.302075496 1.341588833 1.028858158  
 YNL223W YNL223W::AUT2::Involved in autophagy. Interacts with Tub1p and Tub2p  
 and forms a complex with Aut7p. Required for sporulation. 1 0.907705508  
 1.168257554 1.171431768 0.913810128 1 1.196770528 1.446105587  
 1.202397606 0.865810425 1 1.314411611 1.391468652 1.335881351  
 1.324492672 1 1.210832474 0.814130911 1.417043386 1.383989034 1  
 1.055430766 1.053048991 1.374970754 1.405603372 1 1.04449495  
 1.405145987 1.260781661 1.039063762 1.137455487 1.017241981  
 1.004046435 1.020131141 0.908005929 0.756670365 1 1.285165412  
 0.927403896 1.243435948 0.756634629 1.373209988 0.732897299  
 YPL176C YPL176C::YPL176C::molecular\_function unknown 1 0.738604654  
 0.797544518 0.897027261 0.638561155 1 0.892856306 0.952337085  
 0.616361798 0.679205105 1 0.799574037 0.857018499 0.605701684  
 0.811046234 1 0.717504347 0.530172562 0.59039115 0.692925867 1  
 0.902240462 0.792898691 0.953704575 0.735567559 1 0.981955938  
 0.989906398 1.11896812 1.062172729 0.974563615 1 1.004173876  
 0.74862408 1.106439272 1.014354852 0.613034393 1 0.883007842  
 0.744154623 0.994709006 0.619778797 0.814023531 0.757414768  
 YNL225C YNL225C::CNM67::chaotic nuclear migration; predicted mass is 67kDa  
 1 0.766939308 0.959060133 1.345554329 1.332589643 1 0.965752747  
 1.121643419 1.223911949 0.996200087 1 0.81737078 0.931096878  
 0.850421725 1.25691183 1 0.656503496 0.504688307 0.516332959  
 0.82905416 1 1.090684353 1.510396322 1.689836904 1.547557594 1  
 0.808606182 0.693759008 1.118651125 1 1.246412546 1.43681996  
 1.50181584 1.809460864 1 1.680608832 1.492283513 1.439190928  
 1.138927244 1.704974189  
 YPL178W YPL178W::CBC2::cap binding complex 1 1.917204461  
 1 1.818625114 1 1.904352448  
 2.112139986  
 1.009487315 1.006060356 1.008273287 0.98313758 1.139116098 1  
 0.940641216 1.060341739 1.114408101 1.330709086 0.941818541 1  
 0.962483899 1.214442214 1.047096462 0.912109918 20.467711

YNL227C YNL227C::YNL227C::molecular\_function unknown 1 0.902751459  
1.178479763 1.214473711 1.236593927 1 0.911772182 0.900795146  
1.08940626 1.238054221 1 0.751350579 1.20995905 1  
0.67031145 0.493025364 0.76184099 1 0.728618864 0.982752644  
1.00410851 1 0.585379157 0.637930035 0.484454593 0.533231678  
0.956576903 1 0.854963377 1.355828833 0.699690028 2.22598641  
2.993955707 1 0.910845438 1.08092682 1.30526428 0.902206386  
1.205272814 2.07785567  
YPL192C YPL192C::PRM3::pheromone-regulated membrane protein 1  
1.4444023 1.482974513 1.486773768 1.780442472 1 1.197429961  
1.552491986 1.647505205 1 0.824736331 0.922601644 1.489608804  
1.136332836 1 0.593171229 0.673958286 0.767655658 1  
0.640887771 0.99424059 1.21954465 1 0.869853666 0.692777966  
0.977100172 1 0.647854267 0.579074454 0.707349105  
1.338259535 1 0.880223607 0.800590259 1.022691424 1.303831174  
1.630411878  
YNL229C YNL229C::URE2::Nitrogen catabolite repression regulator that acts by  
inhibition of GLN3 in good nitrogen source. Altered form of Ure2p creates  
[URE3] prion. 1 0.89300895 0.96156551 1.07127211 1.093375894 1  
0.95603595 0.910925215 1.081792058 0.981039715 1 0.87698924  
1.023589562 0.935280524 1.013572772 1 1.071626866 0.783031741  
1.139941991 1.076740986 1 1.093329869 0.886513615 0.922140343 1  
0.865318467 0.987989697 0.722729111 0.748168771 0.880749551 1  
0.849583842 0.971464191 0.617575756 0.700082925 0.746073323 1  
1.241614211 1.103512548 1.100484229 1.127717609 1.21422571 0.854609034  
YNL231C YNL231C::PDR16::involved in pleiotropic drug resistance by  
controlling lipids in various cellular compartments; positively regulated by  
PDR1; putative phosphatidylinositol transfer protein. 1 1.239096091  
1.475307486 1.246078968 1.684557832 1 1.158930738 1.194762626  
1.457981142 1.43296032 1 1.404492365 1.401419041 1.143174619  
1.378177917 1 1.938257878 1.663230114 1.247693597 1.89271415 1  
1.580217706 1.507785726 1.132086503 0.891915007 1 1.070034413  
1.235234537 1.207219873 0.896360288 1.160039932 1 1.145430635  
1.504663318 1.025605184 0.955384582 1.187366226 1 1.152510603  
1.450406626 1.128425781 1.484511675 1.183422137 1.605894408  
YNL245C YNL245C::CWC25::Complexed with Cef1p 1 1.61478929  
1.578906305 1.011925137 1.549158897 1 1.313898889 1.150079584  
1.667314286 1 0.994360139 1.096369921 1.529458671 1.189902047 1  
0.796328314 0.578228743 0.724691491 1.365629258 1 1.329757643  
2.109927283 1.424745073 0.943114581 1 0.975925356 1.023257008  
0.82679949 0.901224986 0.851042933 1 0.869120024 1.12829047  
0.774684954 0.788825673 1.277220968 1 0.889245228 1.169291858  
0.809863961 1.336080674 1.013725699 1.353714707  
YPL194W YPL194W::DDC1::DNA damage checkpoint gene 1 1.019030949  
1.380511656 1.37209158 1.072434246 1 1.367897395 1.169374193  
1.197050978 1 0.983997703 1.195023432 1.044705976 1.510627926  
0.5816975 0.61513 0.702566615 0.925576197 1 0.818872229  
1.868062352 1.429203278 1 0.790223659 0.926756868 0.832176868  
0.750764671 0.991296713 1 0.816945214 0.668221888 0.875909809  
0.909057483 0.615048957 1 0.927687877 0.940336804 1.353349448  
0.889976725 0.858987149  
YPL196W YPL196W::OXR1::OXidation Resistance 1 0.940586508 1.389209099  
1.066957989 1.363707297 1 1.190504764 1.158424922 1.500727176  
1.161016135 1 1.011812618 1.603409643 2.071064464 1.152834881 1  
1.67692865 1.189631529 1.19428811 2.1591884 1 2.741171065  
3.024692282 3.889738925 2.23857234 1 1.314213819 1.618046897  
1.079677917 0.939213977 1.212721664 1 1.207163986 1.540527947

1.600212306 1.119627741 1.381117329 1 1.504628902 1.382392311  
1.077472623 1.006822199 1.693807946 1.281037964  
YPL198W YPL198W::RPL7B::Homolog of mammalian ribosomal protein L7 and E.  
coli L30 1 0.928004268 0.825338034 0.811337477 1.168168132 1  
0.882764981 0.8769853 0.956666555 1 0.735185729 0.619003091  
0.521877452 0.801414085 1 1.012149325 0.575053826 0.445377084  
0.663011799 1 0.950605261 0.327625432 0.35391782 0.854721064 1  
1.041807176 0.851599124 1.213364657 1.138368849 0.972297252 1  
1.106959758 1.311167161 0.964272016 0.720824365 1.238635456 1  
0.871825381 0.820080247 1.048916187 1.46058029 0.972838249 1.119047469  
YNL247W YNL247W::YNL247W::not yet annotated 1 1.025654206 0.888077368  
1.182426342 1 1.226685635 1.105288329 0.726667612 0.790545238 1  
0.976980531 0.789423407 0.330222335 1.086358129 1 0.80485029  
0.481745803 1 0.471141456 0.300376553 0.353667944 1  
1.355074428 1.308006575 1.168531041 1.622416053 1.316274699 1  
1.695608874 0.772089796 0.803925128 1.00128246 0.626182612 1  
0.864351609 0.679879631 0.737184799 0.933236365 0.675301168 0.719762951  
YPL200W YPL200W::CSM4::Chromosome segregation in meiosis  
0.84954748  
1 1 0.930522147  
0.86964091 1.026491249 1.172191987 1 0.654315568  
0.797671977 0.822041811 0.888422637 1 0.763459358 0.727727709  
1.090626756 0.80379574 1.036540637  
YNL249C YNL249C::MPA43::Overexpression leads to increased levels of the  
lyase PDC1 1 0.967388387 0.974829664 1.002070318 1.15274007 1  
0.996243064 1.18610144 1.161440313 1 0.999317582 1.014863582  
1.226886361 1.230466963 1 0.888586058 0.95907909 1.330745754 1  
1.097670599 1.944273546 1.144566327 0.73331156 1.094469289  
1.048336793 1.017398251 0.803761091 0.976009422 1 1.1507316  
0.981457426 1.205371419 1.120159123 0.872485466 1 1.291303374  
1.32960781 1.119746552 1.149330816 0.898363477 1.302928543  
YPL202C YPL202C::AFT2::Activator of Iron (Fe) Transcription 1  
0.773004576 0.879941349 0.902809216 1.131326246 1 0.76625221  
0.777972529 0.907037543 1.037150827 1 0.804906698 0.696297881  
0.661354422 1.008592971 1 0.756904682 0.44773563 0.55672139  
0.691477408 1 1.347140959 1.399155963 1.098776871 1.219411624 1  
0.994269854 1.229213881 0.971660913 0.926787579 1.13355004 1  
1.034266691 0.840220183 1.026869499 1.175713363 0.914508503 1  
0.877352715 0.860182094 1.116874097 1.024962854 0.818099006 1.034987604  
YNL251C YNL251C::NRD1::RNA recognition motif-containing protein that  
participates in sequence-specific regulation of nuclear pre-mRNA abundance 1  
1.003514126 0.916195669 0.971060433 0.871679708 1 1.160076465  
1.027272899 0.662593148 0.81944537 1 0.905515396 0.99327827  
1.111871849 0.841800062 1 0.838180164 0.980877557 1.2521619  
0.97525843 1 0.962648043 1.400394232 1.298299758 0.902427081 1  
0.782913435 0.823453224 1.073328486 1.050338191 1.015629433 1  
0.742591043 0.577299096 0.691042087 0.62543732 0.513447363 1  
0.825971518 0.735905746 1.092561564 1.064084655 0.960312084 0.852857756  
YPL216W YPL216W::YPL216W::molecular\_function unknown 1 1.179293915  
1.146065287 1.156653183 1.257925884 1 1.120383067 1.129092434  
1.190342089 1.161286192 1 1.144307587 1.021047937 1.082628999  
1.131099324 1 0.809809343 0.567798866 0.903576829 0.969796925 1  
1.960971517 2.344363447 1.615976047 1.222119141 1 1.150769558  
1.21298679 1.104318115 1.153606851 1.161672532 1 0.901460793  
0.852872076 0.948392601 0.862336633 0.965320748 1 0.91168111  
1.056818344 1.156436154 1.268967464 1.101009226 1.170709299

YNL253W YNL253W::YNL253W::molecular\_function unknown 1 0.853427103  
 0.800247653 0.972627824 1.317474344 1 0.959059751 1.024433189  
 0.837957298 1.261143285 1 0.845914172 0.891909515 0.925661765  
 1.155940496 1 1.370616263 1.077057282 1.122824349 1.861868435 1  
 1.448324094 1.481772772 1.850872238 1.779998993 1 1.017190951  
 1.186603473 1.1344297 0.923942857 1.118944803 1 1.129552465  
 1.224339256 1.31813735 0.824764625 1.025906282 1 1.559085993  
 1.194057623 1.152345943 1.105610332 1.172481654 1.048997512  
 YPL218W "YPL218W::SAR1::Secretion-Associated, Ras-related. Component of  
 COPII coat of vesicles; required for ER to Golgi protein transport" 1  
 1.464985916 1.211596039 0.83537585 1.299136432 1 1.1419251  
 0.961156491 1.035023161 1.190350742 1 1.059983755 1.105665564  
 1.363831498 0.842536467 1 1.072035899 0.659233786 0.811528438  
 1.14108825 1 1.475341803 1.425375242 1.582381341 1.186926508 1  
 1.573711648 1.353269409 1.191916217 1.325991784 1.210399413 1  
 1.031561536 1.263357292 1.010262489 0.714574826 1.243024615 1  
 1.006366348 1.329879359 0.941911665 1.627690705 1.171075336 1.509575756  
 YNL255C YNL255C::GIS2::GIG3 suppressor 1 1.335161825 1.288412577  
 1.022786246 1.523885047 1 1.013101464 0.949310409 1.272731598  
 1.171703824 1 1.064115982 0.785647941 0.791633615 1.077289732 1  
 0.792204822 0.430386898 0.402946423 1.226813941 1 1.743421859  
 0.783890208 1.026689503 1.153265045 1 1.214320228 1.060385832  
 0.827824436 1.09631433 1.176464862 1 1.261266025 1.311590467  
 0.912367068 0.903824649 1.498463316 1 1.111091076 0.980782527  
 0.847503122 2.118143529 0.90117987 0.953554524  
 YPL220W "YPL220W::RPL1A::Homology to rat L10a, eubacterial L1, and  
 archaeobacterial L1; identical to *S. cerevisiae* L1B (Ssm2p)" 1 1.245484837  
 0.958397092 0.682506038 0.962526584 1 0.807608702 0.820990729  
 0.864448368 1.006499845 1 0.782176267 0.835054403 0.648146924  
 0.662868758 1 0.778393885 0.339355729 0.235796708 0.677310893 1  
 1.286598199 0.642911158 0.441158752 0.859428714 1 1.323338024  
 1.027744327 1.525445214 1.563234241 1.068468819 1 1.236694202  
 1.527293956 0.770738343 0.554399444 0.997357215 1 1.033517319  
 0.9666669 0.796211208 1.356436706 0.942298055 1.346709701  
 YNL269W YNL269W::YNL269W::molecular\_function unknown 1 1.59635729  
 1.795189933 1.591055837 1.569617798 1 1.798319921 1.44812027  
 1.599435853 1.641902797 1 1.392354456 1.487236379 1.611576883  
 1.571300468 1 0.376025957  
 1 1.524663928 1.841979974 1.602262626 1.233837918 1.522543258 1  
 0.865987003 0.947229223 1.102978218 0.81419737 0.680458972  
 0.993105239 0.914465304 1.083355985 0.951099305 0.894086029  
 YPL222W YPL222W::YPL222W::molecular\_function unknown 1 0.784495757  
 0.981401475 1.146968479 0.704499657 1 1.350505623 1.091785055  
 1.121946368 1 1.162411258 1.446642524 1.59941245 1.377889409 1  
 2.029123095 1.805232055 2.239041715 1 2.17649753 2.233589837  
 2.943659602 2.177059757 1 1.054828834 1.229334376 1.706166968  
 0.95370505 0.862707472 1 1.010080759 0.954341321 1.486960175  
 1.204721817 0.59491001 1 1.112601211 1.359583178 1.376703423  
 0.713489636 1.479698966 0.852857756  
 YNL271C YNL271C::BNI1::Protein involved in cytoskeletal control and required  
 for proper bipolar budding pattern; interacts with Rho1p 1 1.043806413  
 1.19432036 1.183445759 1 0.964692569 0.902056133 1.038200624 1  
 1.078998246 1.141079529 1.021116592 1 1.100674947 1.272140231  
 1.184995456 1.089744519 1 0.859946665 1.656236649 1.067986783 1  
 1.235327765 1.028928092 1.080154703 1.065598271 1.212962803 1  
 1.201556769 0.986278766 1.061222111 0.879294164 0.821052442 1  
 1.038176871 0.992919784 0.871820984 1.023903423 0.885828049 1.118171805

YPL224C YPL224C::MMT2::Protein involved in mitochondrial iron accumulation  
1 0.92168206 0.991441105 0.956253209 0.876736797 1 0.896985394  
1.056505826 0.873409323 1 1.265091097 1.372105964 1.197001889  
1.116639369 1 1.404095859 1.80894981 1.571215556 1.185780223 1  
1.23464855 0.991508093 0.74845782 1 1.294598648 1.419886155  
1.467061794 1.073791203 0.974108749 1 1.548179677 2.096872996  
2.082367382 1.404352629 1.068181077 1 1.705718487 1.467531657  
1.189826936 0.984604351 1.466267682 0.945673958  
YNL273W YNL273W::TOF1::topoisomerase I interacting factor 1 1  
1.363339007 1.264051096 1.438831038 1.464811666 1 1.604078763  
1.464197454 1.378649569 1 1.182415725 1.038787799 1.120630682  
1.286397252 1 0.789614653 1.145148664 1.18800711 1.612407299 1  
0.65104275 0.776156125 1 1.273004822 1.064673472  
1.339228129 1.615922008 1.382447104 1 0.897347828 0.703178008  
0.770499668 0.865153222 0.54647919 1 0.82527629 0.770219642  
0.800856672 0.715388437 0.99093127 0.589294933  
YNL275W YNL275W::YNL275W::molecular\_function unknown 1 1.224698857  
1.048056318 1.189677644 1.260932289 1 1.192085732 1.120093464  
0.929899104 1 1.131348667 0.842708709 1.055474517 0.92653861 1  
0.5608134 0.569708157 0.770355591 0.759643373 1 0.850876564  
1.355688923 1.736845962 1.18360866 1 0.961744628 0.848269109  
0.787446053 0.957340399 0.812652924 1 0.753455339 0.915069079  
0.904992931 0.606909823 0.744898894 1 0.854196701 0.893518304  
0.81676375 0.929947202 0.883377936 0.952678964  
YNL277W "YNL277W::MET2::catalyzes the conversion of homoserine to O-acetyl  
homoserine which in turn combines with hydrogen sulfide to form homocysteine,  
the immediate precursor of methionine" 1 1.595045575 1.624540604  
1.235805821 0.87690995 1 1.269667492 1.249251664 1.109855601 1  
2.276092042 3.065274104 2.07846436 1.313504565 1 1.02772517  
0.912905821 0.781260669 1.647428594 1 1.268454012 0.71772138  
1.381471437 1 1.187543925 0.938819205 1.074761449 1.055637828  
0.973456137 1 1.528229995 0.78441788 0.798185587 0.959056151  
0.960091529 1 1.245991696 0.750656932 0.89962865 0.721994562  
0.61201033 1.117296244  
YPR128C YPR128C::ANT1::adenine nucleotide transporter 1.230055729  
0.957745961 0.999622517 1.057286562 0.98795403 0.995134112  
1.013609681 1.284869889 1.316550153 1.109545159 1.077417841  
1.047518281 1 1.06806624 1.012478379 1.006479398 1  
1.501510534 1.39179551 1.14981214 0.92687718 1 1.155711612  
1.157203446 1.438625711 1.223146572 0.995563463 1 0.888503595  
0.860060003 0.818297887 0.618419213 0.658855874 1 0.850432228  
0.948288738 0.960342483 0.879769576 0.750823898 0.879126451  
YPR130C YPR130C::YPR130C::molecular\_function unknown 1 1.171689624  
1.52590268 0.97547524 1.550556667 1 1.016035714 1.167276539  
1.474091657 1.514570103 1 0.940920633 1.159187734 1.658304567  
1.195453548 1 1.039043558 0.735293976 0.948661517 1  
1.895106738 3.511199955 2.1856053 1.189834174 1 1.010814887  
0.989771943 0.867965785 0.74057565 0.934551183 1 1.063116555  
1.323600611 1.087252593 1.128782601 1.299409076 1 0.762667582  
1.506386844 1.37552485 1.56879383 1.529484094 1.382610293  
YJL225C YJL225C::YJL225C::molecular\_function unknown 1 1.413002363  
1.313269489 1.278463561 1.227698301 1 1.413159814 1.23278009  
1.475965308 1.307299506 1 1.27375472 1.154533722 1.021733267  
1.058997195 1 0.917697812 0.843278574 0.739611576 1.675296319  
0.481965143 0.508778706 1 1.158164034 1.631540715  
1.141860192 1.1720537 1.250815167 0.957468138 1.224328207

1.264480546 1.08460343 1 1.073831585 1.093244764  
1.089839748 0.586125591 -5.034838  
YJR002W YJR002W::MPP10::part of small (ribosomal) subunit (SSU) processosome  
(contains U3 snoRNA) 1 0.802667054 0.758966558 0.968565693 0.832171351 1  
0.891105442 0.827073661 0.793016371 0.916943611 1 0.676729869  
0.583438323 0.311894925 0.980256146 0.774355728  
0.610632764 1 0.811995737 1 0.780446509  
0.998373805 1.101479168 1.14367779 1 0.904137726 0.864802519  
0.865241017 0.844881601 0.936035909 1 0.887016485 0.809028465  
1.04186982 0.74179895 0.563901851  
YJR004C YJR004C::SAG1::alpha-agglutinin 1 1.067031495 0.685929097  
0.949130561 0.459284687 1 1.197213039 1.108623699 0.501274263  
0.458602066 1 1.040682291 0.753373066 0.281698307 0.386422104 1  
1.350343754 1.334738334 1.051494828 0.499427632  
1 1.217031855 0.733652827 0.935926503 1.315905716 0.782479146 1  
1.076972877 0.858089971 0.816892239 0.708172105 0.804662458 1  
0.998091101 0.92042648 0.95123719 1.075302669 0.382647694  
YJR017C YJR017C::ESS1::Mitotic regulator; structurally and functionally  
homologous to human PIN1 1 1.021323208 1.111526045 0.615171064  
0.589680594 1 0.73299633 1.025704386 0.643563298 0.74347334 1  
0.965814012 1.057528586 1.317204668 0.660305501 1 0.946882106  
0.973031779 1.400721483 1 1.648958023 1.350552307 1.660704399  
1.551436563 1 1.107138913 1.637904508 1.435301863 1.382519337 1  
0.968771966 1.184322872 1.196455793 1.230703558 1.282944808 1  
0.949973298 0.861471629 0.889149616 0.966883408 0.822402937 1.084898103  
YPL226W "YPL226W::NEW1::This gene encodes a protein with an Q/N-rich amino  
terminal domain that acts as a prion, termed [NU]+." 1 1.131496892  
0.68185213 1.20171219 0.675491292 1 1.230723103 1.04133797  
0.730766382 0.769145748 1 0.854654932 0.538424743 0.254673798  
0.905808451 1 0.233020474 0.176453315 0.191156948 0.251298658 1  
0.254331271 0.372290021 0.140599833 0.402271444 1 0.724889931  
0.593141604 0.796300433 1.153741248 0.83328394 1 1.315945027  
0.738143798 0.621549879 0.982440219 0.556773255 1 0.664903938  
0.607227946 0.81194564 0.698074275 0.556767867 0.513115686  
YJR019C YJR019C::TES1::Thioesterase 1 1.021212087 1.088086598  
0.90829711 0.622644364 1 1.184335807 1.302444818 0.764848174  
1.046421634 1 1.35876773 1.405614025 1.891863061 1.00683004 1  
1.342868638 0.925737464 1.430750771 1.281340979 1 1.665973573  
1.34526261 1.149857364 1.642389655 1 1.14283141 1.085572225  
1.331136956 1.548918493 1.410117793 1 0.980781582 0.672763639  
0.714270439 0.742859878 0.641628353 1 0.750916867 0.539865833  
0.768993982 0.641880369 0.718148187 0.473712592  
YPL240C YPL240C::HSP82::82 kDa heat shock protein; homolog of mammalian  
Hsp90 1 0.909438548 1.028957863 1.3453876 0.962652479 1 1.060651183  
1.373224585 1.058530035 0.87450551 1 0.88300642 1.180767133  
1.125258023 0.724825288 1 1.554585534 2.308209216 2.92793385  
1.896135465 1 1.264238 1.430584209 1.990174498 1  
0.87142811 0.865353285 1.001147024 0.696409432 0.845040433 1  
2.605698582 1.234556661 0.50591874 0.439140897 0.429381108 1  
1.293899663 0.925196482 0.627794159 0.475204882 0.856068975 0.661971729  
YJR021C YJR021C::REC107::meiotic recombination protein 1 1.038811688  
1.143243998 1.095428179 1.061756705 1 1.107984184 1.291278818  
1.123967087 1.122456268 1 1.213096862 1.332465963 1.552919733  
1.084345464 1 1.337988068 1.707858951 1.089627824 1  
1.359725106 1.488299475 1.04294091 1.160721348 0.962083017  
1.043734682 1.078017874 0.927864152 1.03533552 1 1.07171193

1.023026313 0.945199646 0.855173184 0.977314744 1 1.075091842  
0.897151259 0.991513597 1.114794934 0.965120123 0.985077  
YPL244C YPL244C::HUT1::similar to UDP-galactose transporter 1  
1.005494443 0.884276122 0.935997357 1.001513005 1 0.866728858  
0.787202911 0.909449466 1.001665691 1 0.901593495 0.684418624  
0.756145863 0.839556147 1 0.728807751 0.453196058 0.547539369  
0.619370678 1 0.879874112 0.555663812 0.613690113 1.175407818 1  
0.935849892 0.947610235 0.811080356 1.199530705 1.110593349 1  
0.51787324 0.604932033 0.550272198 0.541040041 1 0.729233895  
0.627145892 0.849970181 0.882819527 0.762620847 0.691742979  
YJR023C YJR023C::YJR023C::molecular\_function unknown 1 1.140393915  
1.212896528 1.182984531 1.22237704 1 1.188320248 1.225413373  
1.141408926 1 1.083999268 1.163863266 0.999789383 1.084147301 1  
1.331983714 1.420715745 1.524239853 1 1.394287016 1.606638781  
0.37609798 0.485694837 1 0.892096145 1.164340706 0.82147328  
0.868786642 1.113897133 1 0.988243649 1.045885285 1.028293359  
1.088853003 0.818118753 1.124178906 0.917568075 1.200820686  
0.987023915 1.659307463  
YNL279W YNL279W::PRM1::pheromone-regulated membrane protein 1  
1.029313813 0.973119356 1.110334882 0.763952966 1 1.236519521  
1.129280202 0.893089635 0.781974154 1 0.88320676 1.055486802  
0.736365565 0.849915011 1 1.052143341 1.403123961 1.068031636 1  
0.906147437 1.416350727 0.671180641 1 0.768328176 0.718073322  
0.842644787 0.840717498 0.721495556 1 0.6446352 0.741439077  
0.889262404 0.753698951 0.725172289 0.98060616 0.985796471  
1.018709105 1.117580287 0.743503162 0.740777918  
YPL246C YPL246C::YPL246C::molecular\_function unknown 1 1.124150246  
0.852334467 0.655415322 1 0.891465219 0.858718186 0.709336954  
0.748819795 1 1.064158553 0.839759194 1.127142751 0.614676676 1  
0.84793239 0.672499862 0.921597878 0.884830325 1 0.689807753  
0.850612084 0.773313722 0.519807325 1 0.914711196 0.853475209  
1.119331626 1.073290562 0.895032353 1 0.777992657 0.680473595  
0.599709228 0.567027416 0.625359831 1 0.933242946 0.763130914  
0.853912011 0.808765319 0.684986825 0.871245884  
YJR025C YJR025C::BNA1::biosynthesis of nicotinic acid 0.781867233  
1.102375818 0.886689759 1.392093967 0.686482742 0.81280269  
1.150082601 1.333191945 0.787277693 1.164546366 1.690915033  
0.809623924 1 1.069433152 0.950715894 1.113277101 1.367391113 1  
2.215047388 3.005577688 2.380260694 1 0.814454009 1.404206304  
1.122925321 1.149663156 1.185865103 1 1.327069188 1.80694988  
2.01783883 4.187605422 3.854796372 1 1.049927165 1.364287122  
1.360256464 2.138686341 2.659751434 1.350212256  
YNL293W YNL293W::MSB3::Multicopy Suppressor of Bud Emergence 1  
1.049570155 1.1842417 1.077044885 1.169097096 1 1.173747732  
1.199075039 1.027882528 1.079266662 1 0.971508709 1.087855111  
0.945271635 1.159995202 1 1.239762753 0.623913878 0.865200983  
1.519804419 1 1.676700693 1.765925097 1.701564646 1.016366173 1  
1.111120283 1.173014187 1.021105172 0.93778611 1.049191482 1  
1.010998814 1.102642912 1.350233103 0.825697604 0.925377765 1  
1.330652255 1.156867532 1.001004607 1.133323018 1.335844501 1.126928036  
YPL248C YPL248C::GAL4::Positive regulator of GAL genes 1 1.302306261  
1.199150471 1.283820818 1.078002718 1 1.131162659 1.112684411  
1.178736021 1.108093481 1 1.251084992 1.218167209 1.175542541  
1.265557386 1 1.256536574 1.300085009 0.890656645 1  
1.58242032 0.709292547 1 1.128805047 1.149922787 1.136629704  
1.18890223 1.015611808 1 0.906178306 0.850579881 0.737200364

0.915711441 1.021738104 1 1.124723411 0.911564995 1.166197209  
 0.977030778 1.060368078 1.144440604  
 YJR027W YJR027W 1 1.150232291 0.938080754 1.425195708 0.943289043 1  
 1.321166774 1.251991194 1.035044594 0.834828802 1 1.476850074  
 1.417831623 0.594363711 1.215092259 1 0.710008675 1.00898518  
 0.668493329 0.548556645 1 0.319240455 0.296050077 0.192454475  
 0.560430529 1 1.07157217 0.942838972 1.398815209 1.218552178  
 0.892288828 1 1.429638542 1.471694545 2.194764589 3.667682791  
 1.588186943 0.92833746 1.449449014 1.529627705 1.271729232  
 0.741150264 0.950052073  
 YNL295W YNL295W::YNL295W::molecular\_function unknown 1.071219696  
 1.001021031 0.876508812  
 1.177239058  
 1 0.763211643 0.768049608 0.755583293 0.692794144 0.800874352 1  
 1.233486023 0.925047385 1.973481726 1.724011602 1.165899068 1  
 0.999171345 1.026895095 0.814669047 1.359935834 1.116420579  
 YPL250C YPL250C::ICY2::Interacting with the cytoskeleton<br> Involved in  
 chromatin organization and nuclear transport<br> Genetically interacts with  
 <i>TCP1</i> and <i>ICY1</i> 1 2.646298157 1.977331555 1.085660224  
 1.833400447 1 1.238304391 1.37198958 1.350580359 1.594761747 1  
 4.80114501 2.189199803 1.132596496 0.986064865 1 1.164112002  
 0.751966363 0.59922245 0.697810235 1 1.266061039 1.113151097  
 0.37240136 0.480038497 1 1.697091975 1.637127717 1.28270886  
 1.168216137 0.835268482 1 1.979163675 1.692961757 1.423171191  
 0.917648938 1.356700966 1 2.456333558 1.824331145 1.222254106  
 1.397347624 1.042001044 1.17683864  
 YJR041C YJR041C::YJR041C::molecular\_function unknown 1 1.263468078  
 0.978768428 1.111871272 1.204356629 1 1.194324264 1.124598682  
 1.023087657 1.264384991 1 0.925464663 0.783139407 0.84798784  
 0.976825293 1 0.621222014 0.417633455 0.502609788 0.538372056  
 0.701201409 1 0.755050588 0.705280955 0.725960144  
 0.729955033 0.759672072 1 1.324393533 1.272614925 1.051034832  
 1.476215307 1.305680354 1 0.933807929 0.990399861 0.904829991  
 1.352140893 0.827745082 0.945673958  
 YNL297C YNL297C::MON2::protein with similarity to N-terminal region of the  
 human protein BIG1 1 1.27671451 0.973117917 1.553693799 0.981539723 1  
 1.536455994 1.625794428 0.861228314 0.866993401 1 1.216794363  
 1.272125782 0.746642561 1.252110915 1 1.1476887 1.064990946  
 0.806410942 1 0.752492907 0.761804428 0.661010232 1  
 1.099039204 1.027212558 1.279819388 1.292092959 1.070168937 1  
 1.009617844 0.8643527 0.909995838 0.87151957 0.525222258 1  
 0.819428813 0.773215574 0.752878452 0.902088059 0.708576493 0.801195979  
 YPL264C YPL264C::YPL264C::not yet annotated 1 1.707555184 1.656321805  
 1.36386102 1.031857785 1 1.523241842 1.665334327 1.360174188 1  
 2.538335644 1.503308276 1.718179556 1.175952517 1 0.654011692  
 0.599295164 1.456348942 1.247489136 1 1.329413975 2.172784578  
 2.563253917 1.207763915 1 0.696018946 1.010382145 1.101083299  
 0.955696081 0.830276722 1 1.041901274 0.920799966 1.311181019  
 1.14395092 1.252508848 1 0.641512675 1.185708358 0.558694342  
 1.280368913 0.844977137  
 YNL299W YNL299W::TRF5::TRF4 homolog; TRF4/5 function is required for proper  
 mitosis 1 0.782681091 0.725896352 1.141526475 1.219727325 1  
 0.903181639 0.99825082 1.048737182 1.232388638 1 0.468691052  
 0.503799031 0.501346809 1.150321536 1 0.573588324 0.538858914  
 0.769631375 1.186610733 1 0.618520553 0.646092635 0.935355791 1  
 0.683159537 0.503748204 0.572299884 0.829745048 1 0.533062358



0.674417016 0.560435529 0.900792977 0.713561548 1 0.570838064  
 0.688983802 1.109386128 1.088164444 0.81957742 0.817832829  
 YPL266W "YPL266W::DIM1::Dimethyladenosine transferase, (rRNA(adenine-N6,N6-  
 )-dimethyltransferase),reponsible for m6[2]Am6[2]A dimethylation in 3'-terminal  
 loop of 18S rRNA" 1 0.914727667 0.749022882 0.752827678 1.042407452 1  
 0.785411031 0.669347405 0.914875771 1.101121911 1 0.639904265  
 0.432309991 0.428801706 0.999127939 1 0.460406134 0.191310631  
 0.272743517 0.598821482 1 0.60286443 0.669098394 0.516609498  
 0.513266965 1 0.946104634 0.80473904 0.674791631 1.009410085  
 0.972191426 1 1.110926098 0.970757193 0.633658236 0.908979228  
 1.485767971 1 0.992271575 0.918793592 0.860880771 1.473095984  
 0.652591764 0.859862762  
 YNL301C YNL301C::RPL18B::Homology to rat ribosomal protein L18 1  
 1.542914717 1.241120756 0.89097429 1 1.142773128 1.058108674  
 1.098762616 1.062313681 1 1.046717473 0.924017161 0.825022138  
 0.89546241 1 0.762316679 0.358094976 0.241377693 0.633051322 1  
 1.162153749 0.777942134 0.470935051 0.740709835 1 1.363439714  
 0.64509923 0.888833018 1.318444584 1.066998453 1 1.175656589  
 1.285355052 0.99607358 0.513739105 1.182088706 1 1.154913013  
 1.258901738 0.8441904 1.716417172 0.950184179 1.304679768  
 YPL268W "YPL268W::PLC1::Hydrolyzes phosphatidylinositol 4,5-biphosphate  
 (PIP2) to generate two second messengers, inositol 1,4,5-triphosphate (IP3) and  
 1,2-diacylglycerol (DAG)" 1 0.873979128 0.873184169 1.044080006 1  
 1.007595736 0.867195263 1.014665752 1.124031424 1 0.700174572  
 0.839104267 0.748509266 1.021905322 0.876734446 0.76066556  
 1.025973043 1 1 0.887515966  
 0.848138075 0.845216334 1.181947115 1 0.709998032 0.609014679  
 0.600993451 0.872787553 1.136278169 1 1.199534073 1.057914868  
 1.393870634 1.132039636 1.523717342 0.865116491  
 YNL303W YNL303W::molecular\_function unknown 1 1.254179769  
 1.519320617 0.816871298 2.112258415 1 0.952668856  
 1.351283037 1 0.994434572 0.821192692 1.22242139 0.874144192 1  
 0.651087547 0.283655062 0.238200134 0.661217252 1 1.260521124  
 1.001953488 0.773991944 0.528899175 1 0.675750768 0.610978341  
 0.353965856 0.588980431 1.070410138 1 1.014859703 1.212004206  
 0.703262279 0.50946168 1.166343922 1 1.474933723 1.622363863  
 0.87007921 2.660113168 1.426882776 1.048121951  
 YPL270W YPL270W::MDL2::ATP-binding cassette (ABC) transporter family member  
 1 0.823496944 0.855341236 0.870477525 0.748705117 1 0.914884822  
 0.962186834 0.819546332 0.79375157 1 0.959708211 0.833102065  
 0.931983278 0.798684849 1 1.00109443 0.511052392 0.672501702  
 1.110367267 1 1.556016046 2.333553646 1.881588336 1.487324626 1  
 0.984731071 0.902670749 0.958005875 0.988321808 0.884953064 1  
 0.953087095 0.865024502 0.692603762 0.694107291 0.771579429 1  
 0.925716813 1.076800312 1.039128925 1.0711594 1.01096336 1.191724213  
 YNL317W YNL317W::PFS2::Polyadenylation Factor I subunit 2 1  
 1.509503258 1.73065067 1.389812319 1 1.590988743 1.434867218  
 1.368318998 1.212511102 1 1.239475676 1.385015007 1.2393071  
 1.478679179 1 0.988565514 1.166117853  
 0.868856174 1 1.163848321 0.913713283 0.892694266  
 0.91366091 1.068659205 1 1.312496038 0.941782555 1.274650273  
 0.827567748 1.090412591 1 0.947488943 1.067315342 0.894830091  
 1.445235194 0.816645699 0.772300393  
 YNL319W YNL319W::molecular\_function unknown 1 1.543025026  
 1.682953635 1.155030678 1.679650768 1 1.266769724 1.282325677  
 1.523374728 1.452016081 1 1.366557689 1.334889047 2.131013607  
 1.07349379 1 0.996893445 1.247094575 1.199928897 1.142022778 1

|             |                                                                                                                                                                                                                  |             |             |             |             |             |
|-------------|------------------------------------------------------------------------------------------------------------------------------------------------------------------------------------------------------------------|-------------|-------------|-------------|-------------|-------------|
| 0.834486362 | 1.78350668                                                                                                                                                                                                       | 1.439986103 | 0.672701724 | 1           | 0.879378541 |             |
| 0.8304744   | 0.735078765                                                                                                                                                                                                      | 1.07848901  | 1.165794202 | 1           | 0.72008432  |             |
| 0.531231097 | 0.606911985                                                                                                                                                                                                      | 0.974262385 | 0.657940565 | 1           | 0.623254654 |             |
| 0.544512841 | 0.698430912                                                                                                                                                                                                      | 0.57764017  | 0.854920121 | 0.704877326 |             |             |
| YNL321W     | YNL321W::YNL321W::molecular_function unknown                                                                                                                                                                     |             |             |             | 1           | 1.361351398 |
| 1.264393948 | 1.180536645                                                                                                                                                                                                      | 0.779449955 | 1           | 1.647317328 | 1.452451497 |             |
| 0.791215146 | 1                                                                                                                                                                                                                | 1.640383707 | 1.620554059 | 0.930406087 | 1.015461384 |             |
| 0.655444671 | 0.494471598                                                                                                                                                                                                      | 1           |             |             | 1           |             |
| 1.032419958 | 0.931517079                                                                                                                                                                                                      | 1.206373136 | 1.197176557 | 0.635945832 | 1           |             |
| 0.739797223 | 0.601597584                                                                                                                                                                                                      | 0.828658704 | 0.910177669 | 0.417008442 | 1           |             |
| 0.931809222 | 0.717872564                                                                                                                                                                                                      | 1.101569312 | 0.783265594 | 0.997570773 | 0.551643116 |             |
| YJR043C     | YJR043C::POL32::Polymerase-associated gene                                                                                                                                                                       |             |             |             | 1           | 0.72116283  |
| 0.92455121  | 1.078465859                                                                                                                                                                                                      | 1           | 0.741607411 | 0.776363316 |             |             |
| 0.929916131 | 1                                                                                                                                                                                                                | 0.673787517 | 0.660857426 | 0.627988847 | 0.984673707 |             |
| 0.475223032 | 0.342958279                                                                                                                                                                                                      | 0.468061967 | 0.795909586 | 1           | 0.898759082 |             |
| 1.144893178 | 0.760271082                                                                                                                                                                                                      | 1.012830784 | 1           | 0.896713068 | 0.939360216 |             |
| 0.806076477 | 0.712097747                                                                                                                                                                                                      | 1.179033815 | 1           | 1.017141076 | 1.274393415 |             |
| 1.02304584  | 1.057540822                                                                                                                                                                                                      | 1.251566848 | 1           | 1.028380058 | 1.054809565 |             |
| 0.956477199 | 1.35255376                                                                                                                                                                                                       | 0.927569931 | 0.887882787 |             |             |             |
| YJR045C     | YJR045C::SSC1::Nuclear-encoded mitochondrial protein; member of the heat shock protein 70 (HSP70) family; most similar to E. coli DnaK protein; acts as a chaperone for protein import across the inner membrane |             |             |             | 1           | 0.929667828 |
| 0.814822872 | 1.093348868                                                                                                                                                                                                      | 0.627502967 | 1           | 1.159021705 | 1.469891724 |             |
| 0.663917316 | 0.66983727                                                                                                                                                                                                       | 1           | 1.030386908 | 0.931316534 | 0.818336929 |             |
| 0.534467775 | 1                                                                                                                                                                                                                | 1.644376943 | 1.505180333 | 1.962055391 | 1.116299509 |             |
| 0.666189013 | 0.665491296                                                                                                                                                                                                      | 0.559839015 | 0.823255254 | 1           | 1.308153195 |             |
| 0.90277662  | 1.272464152                                                                                                                                                                                                      | 1.360494556 | 0.939766551 | 1           | 1.286094888 |             |
| 0.634164535 | 0.545350228                                                                                                                                                                                                      | 0.545200311 | 0.274658221 | 1           | 0.890477318 |             |
| 0.583937039 | 0.579173163                                                                                                                                                                                                      | 0.433423599 | 0.45349698  | 0.675106128 |             |             |
| YJR047C     | YJR047C::ANB1::hypusine containg protein; ANB1 is expressed under anaerobic conditions and repressed under aerobic conditions whereas its homolog HYP2 is inversely regulated                                    |             |             |             | 1           | 1.911512687 |
| 1.936585341 | 1                                                                                                                                                                                                                | 1.630077426 | 1.370104376 | 1.437181862 | 1.390987325 |             |
| 1.243975485 | 1.127209004                                                                                                                                                                                                      | 1.365755372 | 0.943756247 | 1           | 0.741603617 |             |
| 0.45281762  | 0.559210878                                                                                                                                                                                                      | 0.574692376 | 1           | 0.561889962 | 0.390606892 |             |
| 0.583374948 | 0.780559831                                                                                                                                                                                                      | 1           | 1.103665907 | 0.596499783 | 0.749294924 |             |
| 1.125576548 | 1.149678521                                                                                                                                                                                                      | 1           | 0.674742621 | 0.555556045 | 0.255890046 |             |
| 0.391595858 | 1.214795151                                                                                                                                                                                                      | 1           | 0.644909527 | 0.545740092 | 0.647147551 |             |
| 1.530764413 | 0.696170291                                                                                                                                                                                                      | 1.167206744 |             |             |             |             |
| YJR049C     | YJR049C::UTR1::associated with ferric reductase                                                                                                                                                                  |             |             |             | 1           | 0.958835376 |
| 1.072382963 | 0.964253514                                                                                                                                                                                                      | 1           | 1.124224217 | 1.156027946 | 0.894550481 |             |
| 0.992363928 | 1                                                                                                                                                                                                                | 0.970078057 | 1.12007634  | 1.044006112 | 0.92171839  |             |
| 1.335770935 | 0.878880518                                                                                                                                                                                                      | 1.217711122 | 1.495869715 | 1           | 1.309967241 |             |
| 1.270103175 | 0.826394134                                                                                                                                                                                                      | 1.154230135 | 1           | 0.842887299 | 0.980393505 |             |
| 1.135283565 | 0.959489821                                                                                                                                                                                                      | 1.233818864 | 1           | 1.096659458 | 1.15952675  |             |
| 0.970684679 | 1.155359854                                                                                                                                                                                                      | 1.104926227 |             | 1.022648373 | 0.900199088 |             |
| 0.947806098 | 0.770560961                                                                                                                                                                                                      | 1.209236781 |             |             |             |             |
| YPL272C     | YPL272C::YPL272C::molecular_function unknown                                                                                                                                                                     |             |             |             | 1           | 1.677708809 |
| 1.603668419 | 1.506542865                                                                                                                                                                                                      | 1.645055267 | 1           | 1.4637368   | 1.778903158 |             |
| 1.245222746 | 1.548822037                                                                                                                                                                                                      | 1           | 1.406239877 | 1.291618578 | 1.410987065 |             |
| 1.499189518 |                                                                                                                                                                                                                  |             |             |             |             |             |
| 1.224380525 | 1.244627346                                                                                                                                                                                                      | 1.375052381 | 1.03291191  | 1.282009095 | 1           |             |
| 1.404096467 | 1.212857358                                                                                                                                                                                                      | 0.934689692 | 0.970269748 | 1.03914631  | 1           |             |
| 0.809531673 | 0.940052292                                                                                                                                                                                                      | 1.019750448 | 1.279987894 | 0.971028233 | 1.191724213 |             |
| YJR051W     | YJR051W::OSM1::osmotic growth protein                                                                                                                                                                            |             |             |             | 1           | 0.92762204  |
| 1.017606554 | 1.213320687                                                                                                                                                                                                      | 0.885247627 | 1           | 1.090932273 | 1.0943146   |             |
| 1.157013913 | 1.005052487                                                                                                                                                                                                      | 1           | 1.176653831 | 1.482790754 | 1.099211424 |             |

|             |                                                                                                           |             |             |             |             |   |
|-------------|-----------------------------------------------------------------------------------------------------------|-------------|-------------|-------------|-------------|---|
| 1.226800139 | 1                                                                                                         | 2.032816265 | 1.974297435 | 1.83002329  | 1.471956409 | 1 |
| 1.596122454 | 1.460795158                                                                                               | 1.568879068 | 0.933462722 | 1           | 1.174778179 |   |
| 1.48327438  | 1.950422164                                                                                               | 1.747369439 | 1.684143902 | 1           | 1.446811939 |   |
| 0.932309138 | 1.5588765                                                                                                 | 1.064391258 | 1           | 0.950892015 | 0.672977019 |   |
| 0.917964222 | 0.655952972                                                                                               | 0.797419301 | 0.545513775 |             |             |   |
| YPL274W     | YPL274W::SAM3::S-adenosylMethionine                                                                       | Permease    | 1           | 1.416816432 |             |   |
| 1.092011912 | 0.957956188                                                                                               | 0.764146001 | 1           | 1.106715529 | 1.065049833 |   |
| 0.848993964 | 0.846105774                                                                                               | 1           | 1.26520505  | 1.108085471 | 0.607393977 |   |
| 0.679059799 | 1                                                                                                         | 0.870069136 | 0.495296103 | 0.441963937 | 0.701963862 | 1 |
| 1.113836111 | 0.814590021                                                                                               | 0.668844566 | 0.872042529 | 1           | 0.91419795  |   |
| 0.926084987 | 0.86370542                                                                                                | 1.108734698 | 1.080020231 | 1           | 1.181385358 |   |
| 0.806471449 | 0.625760864                                                                                               | 0.943165697 | 0.684735181 | 1           | 0.950405718 |   |
| 0.787625097 | 0.896683429                                                                                               | 0.865831094 | 0.963469392 | 0.695245482 |             |   |
| YJR065C     | YJR065C::ARP3::actin-related                                                                              | gene        | 1           | 1.562341901 | 0.867571687 |   |
| 0.944312381 | 0.843777805                                                                                               | 1           | 1.222794989 | 1.346458662 | 0.638953563 |   |
| 0.624150248 | 1                                                                                                         | 0.986285126 | 1.177622096 | 1.087419669 | 0.655115323 | 1 |
| 1.817127756 | 1.801467511                                                                                               | 2.145609245 | 1.457642258 | 1           | 1.07730619  |   |
| 0.735134717 | 0.93830242                                                                                                | 0.897975589 | 1           | 1.083803011 | 0.963359661 |   |
| 1.381530166 | 1.161993694                                                                                               | 0.961122087 | 1           | 0.823816955 | 0.839544127 |   |
| 0.74979325  | 0.688473841                                                                                               | 0.465408479 | 1           | 0.98877739  | 0.805418719 |   |
| 1.011795389 | 0.707992769                                                                                               | 0.716103374 | 1.164579958 |             |             |   |
| YPR005C     | "YPR005C::HAL1::Protein induced by NaCl, KCl, or sorbitol; involved in halotolerance (tolerance to salt)" | 1           | 1.178453991 | 1.228826973 |             |   |
| 0.884231248 | 1.234511586                                                                                               | 1           | 1.19838642  | 1.128628237 | 1           |   |
| 0.960098084 | 1.120795714                                                                                               | 1.278199168 | 0.975871942 | 1           | 1.034965734 |   |
| 1.685385516 | 1                                                                                                         | 2.365520639 | 2.761534754 | 2.340618    | 1           |   |
| 0.979092377 | 0.932249937                                                                                               | 0.962955963 | 0.961413931 | 0.917823384 | 1           |   |
| 0.884636383 | 0.92044832                                                                                                | 0.872508444 | 3.368663311 | 1           | 0.795241594 |   |
| 0.946288147 | 1.267522729                                                                                               | 0.895676477 | 2.093688374 | 1.429018341 |             |   |
| YJR067C     | YJR067C::YAE1::Essential protein of unknown function                                                      | 1           |             |             |             |   |
| 1.130746327 | 1.4588299                                                                                                 | 1.151111532 | 1.789473148 | 1           | 1.141964285 |   |
| 1.162888814 | 1.670542658                                                                                               | 1           | 1.175944516 | 1.1569573   | 1.382445469 |   |
| 1.438765797 | 1                                                                                                         | 1.058549384 | 0.743551757 | 1.04998499  | 1           |   |
| 1.828339339 | 1.814784482                                                                                               | 1.146783221 | 1           | 1.031157634 | 1.066112094 |   |
| 0.798101655 | 0.696448407                                                                                               | 1.12696013  | 1           | 1.234039575 | 1.688020988 |   |
| 1.522978661 | 2.64174957                                                                                                | 1           | 1.147337296 | 1.401023088 | 0.91200069  |   |
| 1.844925497 | 1.97278089                                                                                                |             |             |             |             |   |
| YNL323W     | YNL323W::LEM3::Product of gene unknown                                                                    | 1           | 1.737729571 |             |             |   |
| 1.580169334 | 1.719740655                                                                                               | 1.625082524 | 1           | 1.589683427 | 1           |   |
| 1.302399846 | 1.350360513                                                                                               | 1.458561224 | 1.378557162 | 1           | 1.080227195 |   |
| 0.837793677 | 0.648440997                                                                                               | 0.699059761 | 0.685981535 | 1           |             |   |
| 0.950705624 | 0.944513164                                                                                               | 0.874740372 | 0.946461204 | 0.821858653 | 1           |   |
| 0.853251131 | 1.067771083                                                                                               | 1.13774321  | 0.952163876 | 0.790387967 | 1           |   |
| 1.132615222 | 1.043767711                                                                                               | 0.944752519 | 1.098614427 | 1.045993886 | 0.984201335 |   |
| YPR007C     | YPR007C::SPO69::Required for sporulation; highly induced during sporulation.                              | 1           | 0.48768381  | 1.253585626 | 1.024687214 | 1 |
| 1.471775413 | 2.091202321                                                                                               |             |             |             |             |   |
| 0.936777662 | 1                                                                                                         | 1.0323019   |             |             |             |   |
| 0.570649209 | 0.736139815                                                                                               | 0.186520289 |             |             |             |   |
| YJR069C     | YJR069C::HAM1::Product of gene unknown                                                                    | 1           | 1.657931669 |             |             |   |
| 1.49860742  | 1.196390052                                                                                               | 1.995641929 | 1           | 1.117115849 | 1.134033198 |   |
| 1.822754109 | 1.692456415                                                                                               | 1           | 0.964985518 | 1.102336816 | 1.266576416 |   |
| 1.378068566 | 1                                                                                                         | 0.817700087 | 0.592459156 | 0.474235649 | 0.938722848 | 1 |
| 0.784958328 | 0.678221977                                                                                               | 1           | 0.963472417 | 0.910002847 |             |   |
| 1.014926646 | 0.983416222                                                                                               | 1           | 1.28436052  | 1.643729416 | 0.956275752 |   |

1.596564127 1 1.119431745 1.067315342 0.794423797 1.808990772  
1.408878988  
YNL325C YNL325C::FIG4::FIG4 expression is induced by mating factor. 1  
0.794358048 1.031754197 0.920105414 1 0.910758284  
0.945845339 1 0.778839797 0.931589566 0.656778784 1.123105108  
1.448194091 1.113385265 1.211470206 1.241894993 1 0.740044036  
1.190973944 1.037294072 1.571390306 0.835403044 0.983908674  
0.946675438 0.886173245 1.045861148 1 0.873753815 0.793403749  
1.146473206 0.941023034 0.760308493 1 1.122198697 1.335585386  
1.259375395 1.089455795 1.30456532 0.950927634  
YPR009W YPR009W::SUT2::Involved in sterol uptake; homologous to SUT1 1  
1.126251014 1.177680969 0.96023011 1.304676576 1 0.973175199  
0.875584395 1.044915706 1.008839775 1 0.915368327 0.629618879  
0.748770181 0.856501449 1 1.548688422 0.551300314 0.724061512  
1.159694297 1 1.302189568 1.012092857 0.82552267 1.047079934 1  
0.861861313 0.823933062 0.703828885 0.900020032 0.935338298 1  
0.787546089 0.835706716 0.695767243 0.666379664 1.620465102 1  
0.974085087 0.771773965 1.047091183 1.149094962 1.409403743 0.986828225  
YJR071W YJR071W::YJR071W::molecular\_function unknown 1 1.344492  
1.044722497 1.238448605 0.962903178 1 1.1034029 0.986469969  
1.122984129 1.205267468 1 0.910068177 0.524636304 0.445968464  
1.265825186 1 0.238576049 0.210860688 0.507183934 1  
0.578561234 0.210628577 0.355848143 0.406076041 1 0.74211357  
0.401345479 0.616118373 1.497211031 1.003906993 1 0.928718926  
0.345158698 0.267531028 0.580325412 0.397029071 1 0.630335972  
0.275893076 0.680987558 0.804579621 0.229082784 0.898390244  
YNL327W "YNL327W::EGT2::cell-cycle regulation protein, may be involved in  
the correct timing of cell separation after cytokinesis" 1 0.73567236  
0.569258041 0.917867303 0.551566276 1 0.846333097 0.903802145  
0.475685782 0.534928981 1 0.950980383 0.741452937 0.373596999  
0.495778414 1 0.868665466 0.744058851 0.91781662 0.46569308 1  
0.463786974 0.34658497 0.335931682 0.479006545 1 0.983641835  
0.8501536 1.132343343 1.047216709 0.978885738 1 1.141897617  
0.617349146 1.06126878 0.384317524 0.575134153 1 0.743819273  
0.698085868 0.755121722 0.797874821 0.596126932 0.603304945  
YPR011C YPR011C::YPR011C::molecular\_function unknown 1 0.947615165  
1.010108335 0.981015949 0.969096551 1 1.043607819 1.131685066  
1.147187842 1.230106771 1 0.66574724 0.990068026 1.237722428  
0.892830197 1 0.946023044 0.753765307 0.992929013 1.193430532 1  
1.315941456 2.11445986 1.994751027 0.708698794 1 1.226747257  
1.083152461 1.254797097 1.164429415 1.111996542 1 0.978067223  
0.664091461 0.688610067 0.762173883 0.702188758 1 1.213156804  
1.036560167 0.678802058 1.080912391 0.95793264  
YJR073C YJR073C::OPI3::Second and third steps of methylation pathway for  
phosphatidylcholine biosynthesis 1 1.38695453 1.620030176 0.819799077  
0.802583612 1 1.260041839 1.335557171 0.920980405 1.029942246 1  
1.066470105 1.248847386 1.815898578 0.544388383 1 1.371859277  
0.743462808 1.019039275 1.924609987 1 1.450989955 1.147090538  
1.117566496 1.518574167 1 1.308963138 1.380559752 2.257450064  
1.66410484 1.226898917 1 0.768052774 1.217561002 1.804042038  
2.005309202 1.122982579 1 0.95037922 1.108907055 1.46222294  
1.116748701 1.446446856 1.659307463  
YNR002C YNR002C::FUN34::Highly homologous to Ycr010p and similar to Yarrowia  
lipolytica glyoxylate pathway regulator GPR1 (see MIPS) 1 1.15302078  
1.083779237 0.94032023 1.085771667 1 1.110404617 1.112914414  
1.151458918 1 1.19756898 1.073203059 1.303174368 0.960509957 1  
0.970423405 0.741762399 0.975484966 1.082338455 1 0.789158083

0.799043074 0.767456775 0.661355887 1 1.027603414 0.873778905  
 0.937394929 1.086502317 0.914957952 1 0.865978178 0.932293153  
 0.982467231 0.779819728 0.797048909 1 0.923217206 0.800603069  
 0.838314133 0.882541096 0.89360045 1.120798695  
 YPR013C YPR013C::YPR013C::molecular\_function unknown 1 1.030426358  
 1.073513952 1.056369684 1.009987616 1 1.019561713 1.263184067  
 1.078304008 1.116065673 1 1.106190027 1.096769982 1.210487809  
 1.293015657 1 1.047097586 0.750726559 1.201934522 1  
 1.290717853 1.793427994 1.321162009 0.772719884 1 0.93846923  
 1.058305091 1.175870649 1.065297711 1.006317535 1 0.99561511  
 0.759137141 0.828744452 0.893309082 1.302324893 1 1.013573384  
 0.798688667 1.075744141 0.747704218 1.057154052 0.851982143  
 YNR004W YNR004W::YNR004W::molecular\_function unknown 1 1.298869903  
 1.262756901 1.00393138 1.414098597 1 1.049321489 1.088886511  
 1.44516337 1 1.101269068 1.234957809 1.403604158 1.098442544 1  
 0.944089637 1.240014411 1.531376931 1.656358132 1 0.94909166  
 2.202747996 1.105861912 0.682740277 1 1.237721175 1.192491801  
 1.074492392 1.091273323 0.946801012 1 0.886867815 1.045245622  
 0.977668511 1.003724151 1.4127591 1 0.98903058 1.204659028  
 1.274216804 1.519232831 1.39249664 1.334451019  
 YPR015C YPR015C::YPR015C::molecular\_function unknown  
 0.948832385  
 1.057308162 1 1.313122315 1.56216684 2.489465854 3.440927272 1  
 0.94852703 2.864362252 3.124717642 0.898507756 1 1.071352754  
 1.17213084 1.225488198 1.07608641 1 1.236400405 1.315472187  
 1.426688816 1.80459951 1.662911971 1 1.141676199 1.270154373  
 0.832488553 1.641694418 1.127803701  
 YNR006W YNR006W::VPS27::hydrophilic protein; has cysteine rich putative zinc  
 finger essential for function 1 0.725072753 0.925778333 0.881033676  
 0.882265048 1 0.865240284 0.954202556 0.889502614 0.872047237 1  
 0.963022063 1.014903644 0.92465498 0.968717413 1 0.967021913  
 0.852656287 1.280872396 0.90067991 1 0.915456419 1.415957424  
 0.873147768 0.677314402 1 1.330762127 1.396916954 1.346833185  
 0.992747406 1.0780349 1 1.148165858 0.959051037 1.236380048  
 0.952333505 0.832520946 1 1.127935354 1.131120701 1.396861823  
 0.940149829 0.977284933 0.875624  
 YPR029C "YPR029C::APL4::Gamma-adaptin, large subunit of the clathrin-  
 associated protein (AP) complex" 1 0.908429146 0.852209575 1.110743111  
 0.827173305 1 1.050645036 1.169253085 0.861179218 0.725869827 1  
 0.984804924 1.02470182 0.60658719 0.895119541 1 1.123169546  
 0.906290582 1.040523756 0.771208768 1 1.084092578 0.876769768  
 0.899880952 0.765842315 1 1.008661924 1.122950759 1.031243296  
 1.001208012 1.055801847 1 1.09750437 0.893064147 0.768978374  
 0.740172784 0.775132796 1 1.407600732 1.082792519 1.196261725  
 0.936703648 1.273793847 0.719762951  
 YPR031W YPR031W::NTO1::NuA3 ORF 1 0.767628174 0.762840866  
 1.167785751 0.828912631 1 0.854612713 0.970457751 0.988278596  
 1.094721495 1 0.620411597 0.643335082 0.464797524 1.089830895 1  
 0.493590218 0.414925741 0.472330777 0.726062327 1 0.902402283  
 1.632521332 0.544984429 0.668039412 1 0.777292746 0.691024407  
 0.770417544 0.821565856 0.985197019 1 0.748034008 0.677386563  
 0.613314053 0.87026131 1 0.947731214 0.865229893 1.122871431  
 1.175400272 1.04884435 0.843225912  
 YNR008W YNR008W::LRO1::Lecithin cholesterol acyl transferase (LCAT) Related  
 Orf 1 0.610823492 0.636564467 0.780059887 0.466710227 1 0.700186276  
 0.95754457 0.556179674 0.663276333 1 0.734822669 0.769169477  
 0.574683988 0.654565218 1 0.719296887 1.065504707 1.295187409

|         |                                                                                                                           |   |             |             |             |             |             |
|---------|---------------------------------------------------------------------------------------------------------------------------|---|-------------|-------------|-------------|-------------|-------------|
|         | 0.437408982                                                                                                               | 1 | 0.62480405  | 0.578756518 | 0.267535261 | 0.400105354 | 1           |
|         | 0.878150295                                                                                                               |   | 0.986546775 | 1.067176203 | 1.074518541 | 1.038904981 | 1           |
|         | 0.989871532                                                                                                               |   | 0.539135894 | 0.81524328  | 1.201078759 | 0.36727235  | 1           |
|         | 0.585474928                                                                                                               |   | 0.497727806 | 0.846661366 | 0.528233771 | 0.712060233 | 0.606807448 |
| YNR010W | YNR010W::CSE2::Protein required for accurate mitotic chromosome segregation                                               |   |             |             |             |             |             |
|         | 1.022177808                                                                                                               | 1 | 1.407091841 | 0.975891165 | 1.790997515 | 1           |             |
|         | 0.972283986                                                                                                               |   | 1.066417858 | 1.344584352 | 1.524507274 | 1           | 0.92772063  |
|         | 1.152572088                                                                                                               |   | 1.543423317 | 1.276601523 | 1           | 1.395953376 | 1.041003962 |
|         | 1.242421239                                                                                                               |   | 1           | 1.426600345 | 2.398015376 | 2.244656841 | 1.173606621 |
|         | 1.262190554                                                                                                               |   | 1.300182852 | 0.792298598 | 0.957313471 | 1           | 0.979102201 |
|         | 1.254052138                                                                                                               |   | 1.115507522 | 1.421559414 | 1.793605173 | 1           | 0.860049473 |
|         | 1.215618484                                                                                                               |   | 1.120878681 | 1.352865105 | 1.264645217 | 1.377356512 |             |
| YNR012W | YNR012W::URK1::converts ATP and uridine to ADP and UMP                                                                    |   |             |             |             |             |             |
|         | 0.668755822                                                                                                               |   | 0.551009999 | 0.6216901   | 0.659849736 | 1           | 0.583094283 |
|         | 0.681845852                                                                                                               |   | 0.733255146 | 1           | 0.431602325 | 0.297003949 | 0.332705574 |
|         | 0.731599338                                                                                                               |   | 1           | 0.383179971 | 0.252783681 | 0.392191514 | 0.625873627 |
|         | 0.472296597                                                                                                               |   | 0.5463841   | 0.448238222 | 0.683758008 | 1           | 0.594063534 |
|         | 0.367123295                                                                                                               |   | 0.389538545 | 0.829209117 | 0.809674531 | 1           | 0.576461751 |
|         | 0.395407925                                                                                                               |   | 0.752193038 | 0.863576515 | 1           | 0.494177206 | 0.470907083 |
|         | 0.800753727                                                                                                               |   | 0.997017984 | 0.565865267 | 0.645334878 |             |             |
| YNR026C | YNR026C::SEC12::Required for recruitment of Sarlp and vesicle formation at the endoplasmic reticulum.                     |   |             |             |             |             |             |
|         | 0.93936378                                                                                                                |   | 0.788112105 | 1           | 0.938424701 | 0.87461593  | 0.830922574 |
|         | 0.661442598                                                                                                               |   | 0.686151348 | 0.484031637 | 0.880386372 | 1           | 0.788154663 |
|         | 0.619324077                                                                                                               |   | 0.96935353  | 0.834583996 | 1           | 0.742337969 | 0.781293181 |
|         | 0.486185312                                                                                                               |   | 1.037708387 | 1           | 1.011857178 | 0.996945044 | 1.263789034 |
|         | 1.206575544                                                                                                               |   | 1.056891873 | 1           | 1.007792813 | 0.805343634 | 1.040252333 |
|         | 0.986959693                                                                                                               |   | 0.821854652 | 1           | 0.950214947 | 0.725604618 | 1.119224642 |
|         | 0.835334507                                                                                                               |   | 1.008265479 | 0.681235469 |             |             |             |
| YJR075W | "YJR075W::HOC1::Homologous to OCH1, an alpha-1,6-mannosyltransferase; Golgi-localized, type II integral membrane protein" |   |             |             |             |             |             |
|         | 1.17311874                                                                                                                |   | 0.976031911 | 1.037976273 | 1.218990978 | 1           | 1.049249688 |
|         | 1.003277886                                                                                                               |   | 1.148263567 | 1.187079696 | 1           | 1.053807423 | 0.906523733 |
|         | 0.667270903                                                                                                               |   | 1.176334702 | 1           | 0.750188653 | 0.570901602 | 0.489505296 |
|         | 0.638900579                                                                                                               |   | 1           | 0.854268862 | 0.704499388 | 0.652064814 | 0.886701194 |
|         | 1.038210303                                                                                                               |   | 0.796321311 | 1.474939241 | 1.249419886 | 0.957845512 | 1           |
|         | 1.115857808                                                                                                               |   | 0.898256969 | 0.984872434 | 1.211913887 | 0.862341934 | 1           |
|         | 0.828364741                                                                                                               |   | 0.767551823 | 0.83797689  | 0.8822238   | 0.543539282 | 0.746907259 |
| YJR090C | YJR090C::GRR1::F box protein with several leucine rich repeats                                                            |   |             |             |             |             |             |
|         | 1.110973677                                                                                                               |   | 1.1754149   | 1.227294344 | 1.019120894 | 1           | 1.229480393 |
|         | 1.375043482                                                                                                               |   | 0.891119338 | 1.040950871 | 1           | 1.176136052 | 1.142184434 |
|         | 0.977854473                                                                                                               |   | 1           | 0.781597063 | 0.781077205 | 0.721320182 | 0.663257058 |
|         | 0.703087349                                                                                                               |   | 0.865070733 | 0.730681371 | 0.847415029 |             | 0.733830831 |
|         | 0.704106752                                                                                                               |   | 0.653680937 | 0.639906325 | 0.931036446 | 1           | 1.20981071  |
|         | 1.025791332                                                                                                               |   | 0.949317483 | 1.004999061 | 0.940528673 | 1           | 1.099595114 |
|         | 1.286387283                                                                                                               |   | 1.185317771 | 1.126862817 | 0.914928908 | 0.898390244 |             |
| YJR092W | YJR092W::BUD4::co-assembles with Bud3p at bud sites                                                                       |   |             |             |             |             |             |
|         | 0.996821386                                                                                                               |   | 1.017706818 | 0.925294218 | 1.037621645 | 1           | 1.132293513 |
|         | 1.430852581                                                                                                               |   | 0.922473795 | 0.753778103 | 1           | 0.900883201 | 0.966213711 |
|         | 0.696562078                                                                                                               |   | 0.820311269 | 1           | 0.774698133 | 0.566046134 | 0.608176545 |
|         | 0.566213952                                                                                                               |   | 1           | 0.525420023 |             | 0.698848934 | 1           |
|         | 0.661062931                                                                                                               |   | 0.819255667 | 0.868073933 | 0.726484673 | 1           | 0.981752218 |
|         | 0.719558559                                                                                                               |   | 1           | 0.720895791 | 0.666849636 | 0.997488102 |             |
|         | 0.866049775                                                                                                               |   | 1.2791869   | 0.678608579 |             |             |             |
| YJR094C | YJR094C::IME1::Transcriptional activator of meiotic gene expression.                                                      |   |             |             |             |             |             |
|         | 1                                                                                                                         |   | 1.380746576 | 1.348158672 | 1.332064427 | 1.358192472 | 1           |
|         | 1.534835447                                                                                                               |   | 1.262550952 | 1           | 1.507048425 | 1.182145283 | 0.755894795 |

0.93645068 1 0.819899454 0.786324272 0.832187239 0.892881435  
0.288713411 0.570291679 0.218077569 0.291351919 1 1.019577455  
0.975893586 0.81260485 0.772266171 0.748095768 1 1.03802086  
0.897803219 0.731287952 0.681422511 1 1.21692781 0.901613155  
0.716187636 1.238177641 0.887071457 0.92991272  
YPR033C YPR033C::HTS1::Nuclear gene that specifies two messages for  
cytoplasmic and mitochondrial forms 1 1.065249586 0.836376897 0.954169526  
1 1.15517685 0.79770548 0.822743783 0.974086412 1 0.837288967  
0.697116379 0.555883392 0.923405696 1 0.70811329 0.337505137  
0.374994036 0.669787796 1 0.620400978 0.706034291 0.436434988 1  
1.007353467 0.959767404 0.949370452 0.981765832 0.864651573 1  
1.30408959 1.097563451 0.89101597 0.868764819 1.306031616 1  
1.056079334 1.010788722 0.995635591 1.178480987 0.932921516 0.753036653  
YJR096W YJR096W::YJR096W::molecular\_function unknown 1 1.233260481  
1.564500955 2.04595706 1.789386646 1 1.541055656 2.460563801  
2.317843163 1 1.205215045 2.114702399 1.106679639 1.467021745 1  
1.720783509 3.243552522 4.366121353 2.981452436 1 0.91197805  
0.920607338 1.344282007 1.10627331 1 1.236806336 1.751877233  
1.532595598 1.105394994 1.501516184 1 1.074153054 1.586692254  
2.290326579 1.238411021 1.10961763 1 1.085486253 1.17686556  
1.121473786 0.996162304 1.054251293  
YPR035W YPR035W::GLN1::glutamine synthetase 1 0.642801826 0.788892606  
0.899782141 0.86943653 1 0.988308892 1.026384071 0.794039613  
0.810466268 1 0.276530039 0.522781922 0.641643759 0.916329248 1  
0.585732498 0.609353463 0.844907335 0.81860334 1 0.486986607  
0.51936603 0.788767207 0.725766322 1 0.322222663 0.183964007  
0.404581376 1.330772005 1.123447649 1 0.271329603 0.238413347  
0.358293038 1.254426312 2.646267549 1 0.355979182 0.270292778  
1.886852417 1.377491739 6.100521806 1.086649433  
YJR098C YJR098C::YJR098C::molecular\_function unknown 1  
1.231712598 1.263357992 1 1.098491545 1.185320439 1.230438106  
1.21542213 1 1.056547697 1.020323182 1.24770908 1  
0.575929482 0.637356276 0.774496999 1 1.68732301 2.648887743  
2.415014431 0.919460382 1 1.061882519 0.962575681 1.382506847  
0.992331149 1.146730103 1 0.749358221 1.102800103 0.808422631  
1.545958141 1.612737387 1 0.763477513 0.923007886 0.973471939  
0.400210839 0.74403122 0.746907259  
YPR037C "YPR037C::ERV2::Essential for Respiration and Vegetative growth 2.  
Protein forms dimers in vivo/vitro, contains a conserved YPCXXC motif at  
carboxyl-terminal, binds FAD as cofactor, and catalyzes formation of disulfide  
bonds in protein substrates." 1 1.010430559 1.185845074 0.859595144  
1.142837499 1 0.869210418 0.881259984 1.15468572 1.055839953 1  
1.098490849 0.944360176 1.541228008 1.023398036 1 1.02175239  
0.831274545 1.160643389 1.10868069 1 1.154336445 1.97072293  
1.52604752 1.108426192 1 1.013556028 1.006721593 0.83651495  
0.828953249 0.933195196 1 1.010372386 1.531877322 1.074840495  
1.523410548 1.850692273 1 1.193966702 1.599356765 1.511489754  
1.619754119 1.60008813 1.146191829  
YJR100C YJR100C::YJR100C::molecular\_function unknown 1 0.888730265  
0.986156489 0.926838909 1.032963463 1 0.851078781 0.952377585  
1.076652447 1 0.879868317 1.016520425 1.123150207 1  
1.165283298 0.996599723 1.040967225 1.315703598 1 1.495446434  
1.100691186 1.261618077 0.951653203 1 0.990893961 0.816356164  
1.066264324 0.852696607 1.213969457 1 1.041298517 1.474919781  
1.226932705 1.015661237 1 0.880007285 1.195548763 0.837097463  
0.874270747 0.906502877 1.263525396

YNR028W YNR028W::CPR8::Shows similarity to the secretory pathway cyclophilin  
Cpr4 1 0.993409662 1.274281142 0.941551373 1.274096004 1 1.017000336  
1.123963288 0.986804528 1 1.11399168 1.051907563 1.134275574  
0.983764328 1 1.30355506 0.840703389 1.116508958 1.139818686 1  
1.495785961 1.758272668 1.4591161 0.930611119 1 1.133391566  
1.081697694 0.895574928 0.754317913 0.998410124 1 1.117791173  
1.077328451 1.125191483 0.993167455 0.840099422 1 1.230100025  
1.10737405 1.079486588 1.11302158 1.020940733 0.869494607  
YPR039W YPR039W::YPR039W::molecular\_function unknown 1 1.54679597  
1.315490912 1.195518308 1.264466017 1 1.184335879 0.991149021  
1.272653731 1.174435117 1 1.141258269 0.973168853 1.205121244  
1.118493799 1 0.765043557 0.759946258 0.822638709 1  
0.773270762 0.827710224 0.736398457 0.635751334 1  
1.130417631 1.190007396 1.097144377 1 0.920612477 1.351128959  
0.918755362 1.688711019 1.281690822 1 0.755057573 0.70604984  
1.148852074 0.891144568 1.237231038 1.548103238  
YJR114W YJR114W::YJR114W::molecular\_function unknown 1 1.349041868  
1.204081606 1.096513583 0.720668809 1 1.188904549 1.322462592  
1.228155306 1 1.207801562 1.346193152 1.7560032 1.231760792 1  
0.877963515 0.810158798 1.104831938 1 1.423433412 1.091341669  
1.216694675 0.908943715 1 1.296701152 1.142761835 1.541759812  
1.381560111 1.200476932 1 1.271111644 1.131729434 1.010102743  
1.066527642 0.73811658 1 0.808472015 0.646436632 0.834324701  
0.474222651 0.805841641 0.832718402  
YNR030W YNR030W::ECM39::mannosyltransferase 1 0.992186559 0.813475874  
0.87409335 0.801437128 1 0.983393738 0.76035377 0.782628227 1  
1.053763122 0.9321208 0.744687595 0.763738059 1 1.013756734  
0.810542489 1.167298031 0.796661729 1 0.665361682 0.831924388  
0.722590955 0.521805172 1 1.064253459 1.205050961 1.03045354  
1.071961697 0.772141264 1 0.858459668 1.070569165 1.001507466  
0.702239234 0.608533113 1 1.076996186 1.128088817 0.932161421  
0.716931042 1.012270073 0.866867768  
YPR053C YPR053C::YPR053C::molecular\_function unknown 1 1.23913676  
1.193416246 1.02253202 1.391073927 1 0.977406101 1.111391976  
1.071089806 1.1019023 1 0.953509818 0.932559681 1.146615499  
0.93596878 1 1.050895639 0.878667391 0.973029329 0.873776962 1  
1.248555185 1.125987453 1.108790914 0.989752019 1 0.936301591  
0.787794441 0.815425343 1.056272114 0.869137089 1 0.963345688  
1.037567448 0.828409009 0.916536637 1.019790724 1 1.021634107  
1.148005087 1.15662967 1.548815848 1.310270403 1.449157695  
YJR116W YJR116W::YJR116W::molecular\_function unknown 1 1.279279049  
0.919268598 0.880432665 0.763087197 1 0.897506999 0.748022511  
0.789081555 1 1.209636023 1.044467975 1.058841484 1  
0.748565668 2.524697065 1.696770713 0.558688659 1 0.517543872  
0.518623028 0.378188503 0.466410658 1 1.101595262 0.792263036  
1.324556089 1.310605049 0.896626141 1 0.866949512 1.265066133  
0.923770997 0.944496573 1 0.653725723 0.98449479 0.733626211  
0.82441637 0.503869627 1.277535408  
YNR032W YNR032W::PPG1::Serine/threonine protein phosphatase involved in  
glycogen accumulation 1 0.941692576 0.999152723 0.951972703 1.095295654 1  
0.987700215 0.93514593 1.09110314 0.990522039 1 1.118084197  
1.120313319 1.12755284 1.086841848 1 1.525619273 1.18276543  
1.310045273 1.34178215 1 0.990070883 0.994782577 0.959805106  
0.68987081 1 1.074331144 1.206679086 0.938560799 0.884057782  
0.872493193 1 1.261162797 1.300396874 1.484206117 1.027560553  
1.139220652 1 1.519659024 1.245031293 1.120325704 1.032543933  
1.205353619 1.161077402



YPR055W "YPR055W::SEC8::121 kDa component of the Exocyst complex, which is required for exocytosis, and which also contains the gene products encoded by SEC3, SEC5, SEC6, SEC10, SEC15, and EXO70" 1 0.774546294 0.849353091  
1.245846323 0.912869363 1 0.99557331 1.027832469 0.934809807  
0.735604332 1 0.89621013 0.938463933 0.589033998 0.945088714 1  
0.943254388 0.753373893 0.987454701 1 0.844954715 0.986011458  
0.804945357 1.022686413 0.90844376 1.055790627 0.944346548  
1.020982454 1 1.19032349 1.026391079 0.712530382 0.967623924  
0.664085985 1 1.089571829 0.912541906 1.148719082 1.030754345  
0.72501668

YJR118C YJR118C::ILM1::Product of gene unknown 1 1.262810308  
0.981098066 0.874987569 1.20182691 1 0.932535428 0.78179287  
0.95687285 1 0.924900903 0.98499529 1.227247194 0.952846294 1  
1.219987259 0.921205059 1.127146297 1.461814476 1 1.649520841  
1.642337547 1.73486613 1.291514749 1 1.285479817 1.113220185  
0.817175523 0.90509299 0.9210928 1 0.984852711 1.378582315  
1.244124559 0.822232918 1.179073637 1 1.440587677 1.912941327  
1.122568936 1.141430322 1.245061017 1.705715512

YNR034W YNR034W::SOL1::Multicopy Suppressor Of los1 1 1.094987633  
1.127406133 1.034239658 0.944519325 1 1.211292511 0.965713263  
0.89526936 1 1.250446574 1.567349016 1.90440073 0.89012495 1  
1.587165119 1.338712635 2.822035805 1 1.794921565 3.879176738  
5.442003696 1.720848794 1 1.341812402 1.395962026 1.357733668  
1.025939553 1.163271872 1 1.101740868 0.993835649 1.240763453  
0.569248663 0.514352135 1 1.702245208 0.957118806 0.851420554  
0.629360122 1.187023224 1.325694787

YPR057W YPR057W::BRR1::Protein involved in snRNP biogenesis 1  
0.979458351 1.293947724 1.122668879 1.533749026 1 1.024766325  
1.073522803 1.301419084 1.364234703 1 1.027762873 1.167168928  
1.349003364 1.23937049 1 1.034302633 0.763121673 0.836174956  
1.260652814 1 1.458851299 1.306937258 1.256309602 1.100555011 1  
0.822220806 0.840317912 0.763506941 0.751977589 1.08812719 1  
0.936252035 1.053009875 0.951151585 0.981258114 1.268088818 1  
1.092210062 1.14440371 1.078512824 1.24370537 1.520032583

YNR036C YNR036C::YNR036C::molecular\_function unknown 1 1.010041301  
1.152031211 0.967093931 1.533744011 1 0.902241849 1.111126049  
1.432094303 1.590744377 1 0.837604768 1.032750662 1.700503761  
1.034005794 1 1.404030733 1.277183651 1.689375404 1.744537726 1  
1.416537237 1.612071104 2.339797614 1.454888176 1 1.122354173  
1.453902211 1.502802394 1.185906652 0.952782647 1 1.208098865  
1.529113204 1.285172597 0.848935709 1.100623972 1 1.044468185  
1.184115517 0.975525779 1.219131378 1.449687484 1.194351103

YPR059C YPR059C::YPR059C::molecular\_function unknown 1 1.330439959  
1.340066767 0.77199745 1.273339863 1 1.37078547  
1.069982341 1 1.283390783 1.430028917 1.241436336 1.018064895 1  
1.243279394 0.812295732 0.58806412 1 1.777229629 2.611566693  
1.373030487 0.787539278 1 1.119803378 1.075562181 0.90269568  
0.965364466 0.892426203 1 0.968431102 1.367195737 1.076466059  
0.883712211 1.694798592 1 0.898957595 1.527458312 1.007500363  
1.700851927 0.819037494 1.593635726

YPR061C YPR061C::YPR061C::molecular\_function unknown 1 1.153094288  
1.182676628 1.23041955 1.284866199 1 1.144943389 1.16208684  
1.28106288 1 1.194021111 1.476727211 1.647562314 1.152475548 1  
0.599752668 0.812812702 1.827142521 1.340560361 1 1.276938788  
3.017566788 1.623375812 1.321173345 1 0.786829418  
0.892486515 1 0.762246807 0.888389922 1.287197466 1  
0.922872904 0.982801269 1.160959123 1.030584672 1.583503006

YNR050C YNR050C::LYS9::Seventh step in lysine biosynthesis pathway 1  
1.038422746 0.877730473 0.983606655 0.859398502 1 1.025480528  
1.053968391 0.837177842 0.879602289 1 0.843855986 0.929488487  
0.830642559 1.035387454 1 1.828619956 4.351759174 15.12147949  
7.531950835 1 1.705032381 4.232028979 20.70153835 8.637388825 1  
1.026486468 0.846299124 0.953515382 1.358225997 1.276819771 1  
0.996918054 0.837079799 0.813597933 0.490519839 0.749105589 1  
0.984445286 0.812261743 0.896013374 0.887172623 0.883404396 1.204858665  
YPR063C YPR063C::YPR063C::molecular\_function unknown 1 1.029316606  
0.940919735 0.844311318 1.058752214 1 0.944890558 1.133317985  
1.031474564 1.020092491 1 1.268647438 1.268615245 1.091878355  
0.982465779 1 1.981739338 1.448072856 1.158656291 1.283599413 1  
1.767761525 1.53097503 1.06310499 1.01652047 1 1.166118701  
1.291214113 1.086621163 1.066816759 0.845611513 1 1.003851044  
1.386889437 1.008642649 0.903613849 1.20384472 1 0.849836654  
1.11037438 1.024079728 1.282128131 1.065510013 1.013972585  
YNR052C YNR052C::POP2::Putative transcription factor 1 0.736522433  
0.728966805 0.853749998 0.890782488 1 0.896659036 0.897756638  
0.835550183 0.871539509 1 0.799399154 0.813468331 0.750782537  
0.824184312 1 1.057520655 0.794145754 1.001111132 0.78384201 1  
0.794015836 0.806572284 0.781147284 0.745743256 1 1.232407721  
1.180948174 1.048664051 1.080562843 0.959174547 1 1.058762573  
1.198697036 1.117463761 0.919713642 0.939451044 1 1.051558937  
1.092528421 1.027104326 1.152462345 1.022159072 0.844977137  
YNR054C YNR054C::YNR054C::molecular\_function unknown 1 0.605967774  
0.709559074 0.698180537 0.945836367 1 0.636494442 0.614305894  
0.921627352 1.042360078 1 0.450065606 0.421834589 0.431521279  
0.844631356 1 0.238620827 0.277605745 0.358921426 0.474263845 1  
0.585766617 0.725135904 0.486106657 0.549364196 1 0.837396873  
0.787172234 0.667988451 0.768014726 0.861396117 1 0.978067223  
0.974555325 0.787693756 1.325533925 1.577958056 1 0.665859836  
0.706932352 1.048079095 1.148977045 0.652283624 1.107664347  
YNR056C YNR056C::BIO5::transmembrane regulator of KAPA/DAPA transport 1  
0.973697725 0.951901532 1.207220734 1.046928453 1 1.088901672  
1.137501901 1.198119038 1 1.164592584 1.203735512 1.302356007  
1.222444254 1 1.936811281 1.437929496 1.479198628 1.203012402 1  
1.951294145 1.649933656 1.806092914 1.223067139 1 1.614890859  
1.774598151 1.627330103 0.977862073 1.095907023 1 1.202107317  
1.37447967 1.413590368 1.053452179 0.957425418 1 1.291858231  
1.603653858 1.264400743 1.117600197 1.163904715 1.302052878  
YNR058W YNR058W::BIO3::biotin biosynthesis 1 1.088496672 1.013455355  
1.043330802 0.986466568 1 1.119026794 1.100328014 1.282554613 1  
1.425426532 1.068592592 1.008579416 1 1.190373942 1.002369435  
1.681863465 1.211748614 1 1.104129933 0.819581651 1  
1.009930251 1.087716527 0.955033974 1 0.712905682  
0.65410622 0.750087349 0.776562655 0.870820701 1 0.7790137  
0.703153907 0.904192718 0.935430506 1.075752603 1.011345695  
YJR120W YJR120W::YJR120W::molecular\_function unknown 1 1.334115457  
1.486138178 0.969438961 1 1.481981114 1.899850256 0.821356131  
0.862455002 1 1.535913271 1.347477155 0.788853839 1.100605704 1  
0.776844054 0.697450724 0.810611448 0.501159346 1 1.659013335  
1.142797547 0.970225346 0.608836304 1 1.651971603 2.034779261  
3.123616472 0.948658488 0.804337468 1 1.394454573 2.476256668  
2.456349908 1.57524485 1.216995839 1 1.777202896 3.204357143  
1.703800772 1.162682203 0.90693408 0.844101524  
YJR122W YJR122W::CAF17::CCR4 associated factor 1 0.880294948  
1.039688473 1.126859572 0.852943053 1 0.972849782 1.205387195

1.090890682 0.993005291 1 2.46774939 1.699803347 1.351826752  
1.127417843 1 2.051953961 1.577977218 1.584331473 1.336256194 1  
2.508933734 2.147725397 2.241748263 1.240492936 1 1.787186298  
2.069594843 1.981332672 1.256684326 1.046601079 1 2.344108703  
2.17492518 1.723802896 0.761017135 1 1.865699364 1.564496363  
1.449811377 0.555411713 0.768099612 1.092778775  
YJR124C YJR124C::YJR124C::molecular\_function unknown 1.599441844  
0.91333202 1.157281073 0.87519828 1.188934888 1.012708194  
0.844012292 0.77563026 1.116415231 0.653669075 0.558574531  
1.045560212 1 0.294341918 0.36121671 0.486158797 1  
0.425420948 0.462892769 0.745087544 0.692263272 1 0.845679478  
0.624157453 0.785919459 1.12155373 0.927214546 1 0.744830416  
0.623423955 0.485707791 0.486741511 0.48737414 1 0.716248035  
0.736554878 0.78793472 0.443902663 0.538508768  
YJR138W YJR138W::IML1::Product of gene unknown 1 1.906059675  
1.750797517 2.253738589 1 1.862458817 1.334046545 2.38866144  
1.919098116 1 1.852068631 1.584559046 2.39597729 2.011419848 1  
1.164179689 1 0.992852056 1  
0.928617443 0.803975643 0.860361753 0.836277231 0.880678202  
0.752122033 0.78126048 0.626274677 1 0.959791384  
1.047646291 0.540946693 1.100900864 1.044619396  
YPR077C YPR077C::YPR077C::molecular\_function unknown 1  
1 1 1.096966356 1  
1.060952116 2.90630033 1 1.704690556 1  
0.905028256 1.052395239 1.178444075 1.151398269 1  
0.781114412 0.881947921 1 0.823324128 0.796334952 0.880873584  
0.734694716  
YJR140C YJR140C::HIR3::Involved in cell-cycle regulation of histone  
transcription 1 0.83548181 0.651739543 0.891912602 0.605174049 1  
0.793270181 0.793925731 0.652695877 0.656230545 1 0.856891058  
0.84200742 0.570001512 0.95821178 1 0.987252002 0.731457636  
0.695257 1 0.784235612 0.980317689 1.000991785 0.729791011 1  
0.908868187 0.823047231 0.994963514 1.061799967 1.011054068 1  
1.366307739 0.991593198 1.248072599 1.309766393 0.766147647 1  
0.889723991 1.10504423 0.675673885 0.880008678 0.823962171  
YPR079W YPR079W::MRL1::Mannose 6-phosphate Receptor Like 1  
0.905057187 1.045222524 0.999448573 0.916109595 1 0.946776034  
1.104929831 1.014689533 1 1.301605456 1.34262261 1.301268836  
1.05887613 1 1.470332241 1.063058189 1.445049251 1.699907577 1  
1.784956297 2.336868673 2.027257073 1.448242942 1 1.669905998  
1.995370242 2.069942219 1.231293198 1.205453679 1 1.484509905  
2.101920864 2.179660548 1.509245339 1.23196218 1 1.421761891  
1.601886223 1.2541445 1.239799599 1.020284934 1.109415573  
YJR142W YJR142W::YJR142W::molecular\_function unknown 1 1.075156667  
1.170193026 1.188347668 1 0.94107226 0.841638292 1.083928156  
1.012245617 1 0.983634541 1.142833198 1.226528047 1.245577964 1  
1.522659976 1.273000354 1.519482189 1.802886135 1 1.786179205  
1.741737207 1.659081837 1.929097837 1 1.23016121  
0.932592852 1.365914008 1 1.069875768 1.425629459 1.485957176  
1.210008348 1.243201798 1 1.704694528 2.044290097 1.329889002  
1.190490157 1.869282787 1.132181817  
YPR081C "YPR081C::GRS2::Possible pseudogene; has similarity to Grs1p glycyl-  
tRNA synthetase, but expression is very low and GRS2 cannot substitute for GRS1"  
1 0.866462779 0.992445358 1.027157041 0.880662467 1 1.071581708  
1.211199969 1.000882762 0.947189499 1 0.93259412 1.211439477  
1.006713121 1.002306662 1 1.105520077 0.710711884 1.075159926  
1.27538133 1 1.747977265 1.774384143 0.962382712 1.135612051 1

0.97704561 1.258845337 1.15465724 1.028057348 0.977104072 1  
 1.155484086 1.091446596 1.550261042 1.244043361 1 1.061694363  
 1.226086054 1.274932442 0.868036958 1.326266477 0.866867768  
 YJR144W YJR144W::MGM101::Involved in mitochondrial genome maintenance  
 0.7326158 0.895110963 0.763693749 0.988758681 0.771233765  
 0.731522421 1.123583027 1.137425847 0.720967924 0.792230047  
 1.200240466 1 0.846600628 0.718670551 0.552184676 0.91434202 1  
 1.077212701 0.883833041 0.942174741 1.160905326 1 0.996351026  
 1.048088384 0.824516919 0.723240294 0.949073972 1 0.896029918  
 1.143244739 1.117533263 1.059843774 1.282122164 1 1.31378465  
 1.377444323 1.201804505 0.995335178 1.370149202 1.190848653  
 YNR060W YNR060W::FRE4::similar to FRE2 1 0.90509771  
 1 1.090516569 1 2.013340997 1.198153685  
 1 0.648652295 0.687209541 1.094060632 0.860984672 1 0.894015208  
 0.894612081 0.766051172 1 1.663331883 1.120239411  
 1.006713257 1 0.716084965 0.540462282 0.588732858 0.60903287 1  
 0.849894708 0.905072529 0.770120537 0.772400673 1.144440604  
 YPR083W YPR083W::YPR083W::molecular\_function unknown 1 1.070929285  
 1.061789247 1.176360266 1.046063616 1 1.118198522 1.244828156  
 1.081121343 1.26135249 1 1.007571169 0.874663078 0.853397226  
 1.215952904 1 0.893790083 0.493376986 0.599809221 0.921298827 1  
 0.700219009 0.930731212 0.627419687 0.895361902 1.074108018  
 0.969912938 1 1.295982434 1.966812181 1.178781301  
 1.717223197 1.943823382 0.775369502  
 YPR083W YPR083W::YPR083W::molecular\_function unknown 1 2.211210974  
 2.110959397 1 1  
 1.692627954 0.739919236 1  
 1 1.013940548 0.889465922 1.112676402 0.996073344  
 1.104489456 1 0.955947763 0.72910127 0.962841722 0.930200952  
 0.584899351 1 0.883420344 0.839065121 0.895835304 1.05032082  
 0.824191756 1.751248  
 YJR146W YJR146W::YJR146W::molecular\_function unknown 1 1.273498482  
 1.252911622 1.13498207 1 1.076368193 1.078422846 1.295557026  
 1.211511175 1 1.206425515 1.330129415 2.088771951 1.219274804 1  
 1.1219555 1.052310117 1.270752758 1.273892999 1 1.943804945  
 3.204159957 4.219827163 1.780050664 1 0.946572047 0.980071269  
 1.253910732 1.278224297 1.061649962 1 0.758970424 1.035624014  
 1.058118517 0.990764325 1.082968736 1 0.803336583 1.067506137  
 1.076164751 0.948222204 1.055136496 0.936917726  
 YNR074C YNR074C::YNR074C::not yet annotated 1 0.875324646 0.846289541  
 0.839406432 0.647698617 1 0.965141948 0.97449104 0.948210742  
 0.974781106 1 2.34384588 3.00572815 1.734577061 1.100553341 1  
 2.094627838 1.409819001 2.451044105 1.567902838 1 2.328784109  
 3.09923852 1.671785856 1.047191166 1 1.850533659 3.203790517  
 3.936378322 1.6995843 1.182133559 1 1.712487925 1.886510332  
 3.228554592 2.803033974 0.970576153 1 2.175859531 2.287785135  
 2.938500831 1.041952027 0.935204881 1.198729219  
 YPR085C YPR085C::YPR085C::molecular\_function unknown 1 1.937385177  
 1.543614835 1 2.00945327 1  
 1.51304328 1.94099061 1.581721597 1.531123948  
 1 1.075476177 2.253354136 1 0.721874041 0.513574737  
 1.053218928 1.000951641 0.795105173 1 1.45849612 1.376311017  
 1.043949372 1.303013136 1 1.157456849 0.880074063  
 1.057758657 49.472756  
 YJR148W YJR148W::BAT2::Branched-Chain Amino Acid Transaminase 1  
 0.753430926 0.748325875 0.75439764 0.544950891 1 0.808753613  
 0.909319442 0.704287223 0.744683325 1 0.842690308 0.940287763

|             |                                                                                                                                             |             |             |             |             |
|-------------|---------------------------------------------------------------------------------------------------------------------------------------------|-------------|-------------|-------------|-------------|
| 0.950793667 | 0.891607061                                                                                                                                 | 1           | 1.680741769 | 0.524757859 | 1.739849367 |
| 1.109189646 | 1                                                                                                                                           | 1.373659909 | 1.228161327 | 1.389100819 | 1.139563061 |
| 1.046506553 | 1.458991004                                                                                                                                 | 2.159014101 | 2.006948719 | 1.597679597 | 1           |
| 1.232364707 | 1.493546316                                                                                                                                 | 3.169904398 | 3.840585134 | 1.624385883 | 1           |
| 0.815097325 | 1.245332391                                                                                                                                 | 2.138635036 | 0.983113621 | 1.870832948 | 1.06738564  |
| YNR076W     | YNR076W::PAU6::member of the seripauperin protein/gene family 1                                                                             |             |             |             |             |
| 0.986015826 | 1.271885889                                                                                                                                 | 0.792289045 | 1.386242599 | 1           | 1.006318897 |
| 1.265207016 | 1.296008834                                                                                                                                 | 1           | 1.122767152 | 1.087327216 | 1.866320247 |
| 1.137424872 | 1                                                                                                                                           | 1.305553553 | 1.100226688 | 1.641090959 | 1.573318781 |
| 1.456647871 | 2.648032194                                                                                                                                 | 2.077378901 | 1.259501241 | 1           | 1.140907154 |
| 1.270593729 | 1.134681661                                                                                                                                 | 1.114128574 | 1.034060799 | 1           | 0.665229517 |
| 1.191908507 | 1.389440119                                                                                                                                 | 1.080378543 | 1.174731378 |             | 0.877205089 |
| 0.967250356 | 1.014538333                                                                                                                                 | 1.180781298 | 1.147018303 | 2.844902439 |             |
| YPR087W     | YPR087W::VPS69 1 1.308102218 1.729878524 1.203374758                                                                                        |             |             |             |             |
| 1.866358111 | 1                                                                                                                                           | 1.172712306 | 1.119621624 | 1.843581063 | 1.704934881 |
| 1.075095633 | 1.28144522                                                                                                                                  | 2.01222074  | 1.425384899 | 1           | 1.173226939 |
| 1.021655857 | 0.918674853                                                                                                                                 | 1.376379255 | 1           | 1.494463096 | 2.155107051 |
| 1.508211608 | 1.063207333                                                                                                                                 | 1           | 0.873979876 | 1.046792643 | 0.760356985 |
| 0.625027508 | 0.727856496                                                                                                                                 | 1           | 1.143225922 | 1.479594724 | 1.067599986 |
| 1.345006299 | 1.820848577                                                                                                                                 | 1           | 1.432861234 | 1.932922158 | 1.321463056 |
| 1.957531308 | 1.416334525                                                                                                                                 | 1.598013842 |             |             |             |
| YJR162C     | YJR162C::YJR162C::molecular_function unknown 1                                                                                              |             |             |             |             |
| 1.149270352 | 0.760657215                                                                                                                                 | 1           | 1.05623783  | 0.922877678 |             |
| 0.884393146 | 1                                                                                                                                           | 1.15849566  | 1.209667246 | 2.510359338 | 1           |
| 0.699832921 | 1.304612624                                                                                                                                 | 0.712709845 | 1           | 0.655856    | 1.551256418 |
| 1.416380848 | 1.161192067                                                                                                                                 | 1           | 1.101522045 | 1.286537568 | 1.182397955 |
| 0.8975471   | 1.175202944                                                                                                                                 | 1           | 0.67863382  | 0.878137798 | 1.043030799 |
| 1           | 0.523327896                                                                                                                                 | 0.565927416 | 0.809724199 | 0.725501394 | 0.761317735 |
| 0.616439293 |                                                                                                                                             |             |             |             |             |
| YOL001W     | YOL001W::PHO80::Negative regulator of PHO81 and PHO5 1                                                                                      |             |             |             |             |
| 1.051692217 | 1.059656945                                                                                                                                 | 0.921973859 | 1           | 0.965960164 |             |
| 1.036882419 | 0.975530162                                                                                                                                 | 1           | 0.976852033 | 0.96703309  | 1.307034996 |
| 0.914675046 | 1                                                                                                                                           | 0.977195826 | 0.713725391 | 1.377868745 | 1.094482584 |
| 1.06891715  | 1.805626044                                                                                                                                 | 1.937138318 | 0.797402144 | 1           | 0.923634144 |
| 1.057792915 | 0.915931435                                                                                                                                 | 1.070162822 | 1.03054945  | 1           | 0.833202592 |
| 0.855548492 | 1.00285813                                                                                                                                  | 0.973243269 | 1.105011078 | 1           | 0.74206442  |
| 0.681133974 | 0.887071655                                                                                                                                 | 0.774067854 | 1.049646212 | 1.349336592 |             |
| YPR101W     | YPR101W::SNT309::Synergistic to prp19 (NineTeen) mutation. Essential for mRNA splicing. 1 0.989554468 1.268489742 0.908760768 1.403965601 1 |             |             |             |             |
| 0.843781878 | 0.738936959                                                                                                                                 | 1.153001662 | 1           | 0.817160466 | 1.037542659 |
| 1.086256698 | 0.912004709                                                                                                                                 | 1           | 0.810068743 | 0.651583076 | 0.567840053 |
| 1.347285465 | 1                                                                                                                                           | 1.1932088   | 2.403041392 | 2.250271564 | 1.043458944 |
| 0.794580039 | 0.915018091                                                                                                                                 | 0.522656797 | 0.559649598 | 0.912543011 | 1           |
| 1.060514014 | 1.464572235                                                                                                                                 | 0.866549457 | 1.09047548  | 2.434597033 |             |
| 0.827441316 | 0.843537035                                                                                                                                 | 1.293310089 | 1.232897566 | 1.656680573 |             |
| YPR103W     | YPR103W::PRE2::responsible for the chymotryptic activity of the yeast 20S proteasome 1 0.897260157 1.14508164 1.078356983 1.118775946 1     |             |             |             |             |
| 0.971291658 | 1.09254773                                                                                                                                  | 1.309346776 | 1.206992019 | 1           | 1.042806997 |
| 1.379164146 | 1.91031156                                                                                                                                  | 0.960028837 | 1           | 1.640405547 | 1.696001865 |
| 2.012042681 | 1.87318809                                                                                                                                  | 1           | 1.751492018 | 1.731127441 | 2.245438647 |
| 1.360626023 | 1                                                                                                                                           | 0.969766853 | 1.486091906 | 1.745182043 | 0.809759469 |
| 1.107698498 | 1                                                                                                                                           | 1.423566642 | 2.167784191 | 1.316767765 | 1.160606913 |
| 1.047822018 | 1                                                                                                                                           | 1.442870468 | 1.70048158  | 1.15211254  | 1.108440402 |
| 1.074930977 | 1.056878183                                                                                                                                 |             |             |             |             |
| YOL003C     | YOL003C::YOL003C::molecular_function unknown 1 1.203668664                                                                                  |             |             |             |             |
| 1.104643795 | 0.99138497                                                                                                                                  | 1.52718914  | 1           | 1.15473518  | 0.999774439 |
| 1.278301315 | 1                                                                                                                                           | 1.119855419 | 1.025976513 | 1.205607836 | 1.102227004 |

|                 |                                                                                    |                 |                 |                      |             |
|-----------------|------------------------------------------------------------------------------------|-----------------|-----------------|----------------------|-------------|
| 1.191008338     | 1.192985612                                                                        | 1.160096423     | 1.267280427     | 1                    | 1.080024085 |
| 1.317110044     | 1.103993129                                                                        | 0.975687259     | 1               | 1.11465766           | 1.19303471  |
| 1.063866522     | 1.066248191                                                                        | 0.950994794     | 1               | 0.998423457          | 1.147371327 |
| 1.205031916     | 0.92768966                                                                         | 0.869509889     | 1               | 1.040642868          | 1.04439691  |
| 1.002320497     | 1.020360589                                                                        | 1.144827648     | 1.006092019     |                      |             |
| YPR105C         | YPR105C::COG4::<b><u>C</u></b>                                                     | onserved        | <b><u>O</u></b> | ligomeric            |             |
| <b><u>G</u></b> | olgi complex                                                                       | <b><u>4</u></b> | <br>            | Complexed with Cog8p | 1           |
| 0.960696731     | 1.010366102                                                                        | 1.2030951       | 0.960945719     | 1                    | 1.118604492 |
| 0.991769235     | 1.018514835                                                                        | 0.819905576     | 1               | 0.930564873          | 1.088159524 |
| 0.883573319     | 1.048232544                                                                        | 1               | 1.273865361     | 0.827440732          | 0.785006646 |
| 1.023693585     | 1.298823161                                                                        | 1.433057595     | 1.093285108     | 1                    | 1.097466913 |
| 1.075308627     | 0.899052144                                                                        | 0.831229357     | 0.95036754      | 1                    | 1.244705517 |
| 1.126975891     | 0.714902066                                                                        | 0.896475523     | 0.862990164     | 1                    | 0.99395933  |
| 0.928882925     | 1.103934449                                                                        |                 | 0.987608841     | 1.346709701          |             |
| YOL005C         | "YOL005C::RPB11::RNA polymerase II subunit, homologous to S. pombe Rpb11p subunit" | 1               | 0.919366485     | 1.337684732          | 1.037502083 |
| 1.473258989     | 1                                                                                  | 0.955362602     | 1.232312708     | 1.391184172          | 1.361444079 |
| 1               | 1.02881217                                                                         | 1.241062118     | 1.492770011     | 1.201529504          | 1           |
| 1.174916935     | 1.109870836                                                                        | 1.020739606     | 1.439317035     | 1                    | 1.339877591 |
| 2.278278056     | 1.591876384                                                                        | 1.17527685      | 1               | 1.054423476          | 1.093698811 |
| 0.677653073     | 0.78864116                                                                         | 0.917526458     | 1               | 1.13021103           | 1.237825888 |
| 1.413950146     | 1.336230662                                                                        | 1.837351659     | 1               | 0.982345855          | 1.347053454 |
| 1.216994815     | 1.642118115                                                                        | 1.037234432     | 1.556859469     |                      |             |
| YPR107C         | YPR107C::YTH1::Yeast 30kDa Homologue                                               | 1               |                 | 0.91720684           |             |
| 1.06958166      | 0.810275501                                                                        | 1.011396041     | 1               | 0.896317977          | 0.936534659 |
| 1.266386092     | 1.054172939                                                                        | 1               | 0.935840421     | 1.13852735           | 1.410637404 |
| 0.992486419     | 1                                                                                  | 1.145248577     | 0.744303845     | 1.141868332          | 1.660578362 |
| 1.640267376     | 2.476440279                                                                        | 2.387048064     | 0.86756573      | 1                    | 1.363961557 |
| 1.663923378     | 1.142972077                                                                        | 1.064268617     | 1.105007538     | 1                    | 1.092553393 |
| 1.335098758     | 1.340357178                                                                        | 0.871560136     | 1.298985459     | 1                    | 1.197922325 |
| 1.458945892     | 0.953204453                                                                        | 1.194893652     | 1.253882803     | 1.338829134          |             |
| YOL007C         | YOL007C::YOL007C::not yet annotated                                                | 1               | 0.689937326     | 0.611991515          |             |
| 0.898840798     | 0.942034323                                                                        | 1               | 0.799403234     | 0.852871017          | 0.734590992 |
| 0.935481135     | 1                                                                                  | 0.539021559     | 0.479937177     | 0.476605769          | 1.158725915 |
| 1               | 0.451273482                                                                        | 0.365497052     | 0.426769038     | 0.72042221           | 1           |
| 0.52973039      | 0.605609607                                                                        | 0.322083685     | 0.752771021     | 1                    | 0.959637227 |
| 0.82074415      | 1.154003449                                                                        | 0.960972145     | 1.012562332     | 1                    | 0.777589695 |
| 0.604310772     | 0.858209689                                                                        | 0.578778339     | 0.486966085     | 1                    | 0.685484372 |
| 0.607017603     | 1.29495236                                                                         | 0.790967635     | 0.862354167     | 0.739902305          |             |
| YOL116W         | YOL116W::MSN1::multicopy supressor of snf1 and sta10 mutations                     | 1               |                 |                      |             |
| 0.929920008     | 0.984770159                                                                        | 1.267955912     | 0.927479649     | 1                    | 1.034779022 |
| 1.103196045     | 0.990318888                                                                        | 1.010515301     | 1               | 0.983280079          | 0.998540791 |
| 0.904744798     | 1.290623006                                                                        | 1               | 1.443980934     | 1.513073493          | 1.023248612 |
| 1               | 1.279310494                                                                        | 0.981973342     | 1.424131038     | 1                    | 1.191323732 |
| 1.217048845     | 1.423513013                                                                        | 1               | 0.941971932     | 0.915330605          | 1.058897373 |
| 1.04406759      | 0.704044734                                                                        | 1               | 1.04391797      | 0.968752489          | 1.001725118 |
| 0.552584677     | 1.010922273                                                                        | 0.741653531     |                 |                      |             |
| YOL118C         | YOL118C::YOL118C::molecular_function unknown                                       | 1               |                 | 1.949893844          |             |
| 2.034026396     | 1.297781701                                                                        | 1.4894821       | 1               | 1.218357811          | 1.536856822 |
| 1.547366019     | 1                                                                                  | 5.930808416     | 5.608151389     | 3.600407584          | 2.040965701 |
| 3.867770223     | 3.695612795                                                                        |                 | 2.483060749     | 1                    | 4.280551275 |
| 5.308144944     | 4.211126341                                                                        | 2.022075121     | 1               | 2.683235713          | 2.239084496 |
| 1.297608388     | 1.080965299                                                                        | 1               | 1.983556901     | 4.63014861           | 5.326852119 |
| 4.30409063      | 3.770577602                                                                        | 1               | 3.324881426     | 5.118467328          | 3.000142543 |
| 0.058524761     | 2.086480568                                                                        | 10.82621542     |                 |                      |             |
| YOL120C         | YOL120C::RPL18A::Homology to rat ribosomal protein L18                             | 1               |                 |                      |             |
| 1.207046872     | 0.895180827                                                                        | 0.612030773     | 0.933105139     | 1                    | 0.846072053 |

|             |                                                     |             |             |             |             |
|-------------|-----------------------------------------------------|-------------|-------------|-------------|-------------|
| 0.750385746 | 0.772139319                                         | 0.778140553 | 1           | 0.893121099 | 0.743499064 |
| 0.639628771 | 0.6357815                                           | 1           | 0.880867795 | 0.676958432 | 0.306668517 |
| 0.5494129   | 1                                                   | 1.232782115 | 0.662066443 | 0.578484151 | 0.859369315 |
| 2.170170144 | 1.23197925                                          | 1.930134167 | 1.896877399 | 1.770413225 | 1           |
| 1.115339818 | 1.425769054                                         | 0.809650526 | 0.492943687 | 0.918675844 | 1           |
| 1.331292418 | 1.270251453                                         | 0.721549697 | 1.52183307  | 0.771539124 | 1.342331585 |
| YKL002W     | YKL002W::DID4                                       | 1           | 1.077206177 | 1.470901499 | 1.060843658 |
| 1.569699506 | 1                                                   | 0.96975873  | 0.939831066 | 1.513584412 | 1.536244009 |
| 1.067233381 | 1.517772046                                         | 2.141375173 | 1.542243111 | 1           | 1.526615057 |
| 3.722314706 | 1.532473509                                         | 2.045520512 | 1           | 1.618657764 | 2.248115797 |
| 2.712154996 | 1.753749431                                         | 1           | 1.10725437  | 1.279062983 | 1.097223353 |
| 1.127799634 | 1.292808508                                         | 1           | 1.1308026   | 1.780986212 | 1.579475832 |
| 1.416060721 | 1.659999743                                         | 1           | 1.14951375  | 1.762506163 | 1.147536347 |
| 1.753198101 | 1.98536063                                          | 1.389615299 |             |             |             |
| YKL004W     | YKL004W::AUR1::involved in phospholipid metabolism  | 1           |             |             |             |
| 1.348586683 | 0.672499967                                         | 0.776764475 | 0.623843746 | 1           | 0.860553947 |
| 0.667970798 | 0.688021471                                         | 1           | 1.109948409 | 0.640000243 | 0.449304214 |
| 0.853303701 | 1                                                   | 0.89866551  | 0.202901203 | 0.62460391  | 0.46436615  |
| 0.410058745 | 0.272909174                                         | 0.164624782 | 0.46706349  | 1           | 1.191513085 |
| 0.718184968 | 1.138425915                                         | 1.728225787 | 0.74229207  | 1           | 0.576495952 |
| 0.466611226 | 0.510341216                                         | 0.461830864 | 0.3684529   | 1           | 0.799975802 |
| 0.656512362 | 0.647269458                                         | 0.740314531 | 0.62271417  | 0.705752939 |             |
| YGR253C     | YGR253C::PUP2::Proteasome subunit                   | 1           | 1.121494486 | 1.253709215 |             |
| 1.078586307 | 1.356235954                                         | 1           | 0.975414847 | 1.106786472 | 1.444398486 |
| 1.312190816 | 1                                                   | 1.000131495 | 1.283271012 | 1.859148819 | 1.124563735 |
| 1.41128773  | 0.979832962                                         | 1.687088897 | 1.724106855 | 1           | 2.29480083  |
| 2.723520304 | 3.142350233                                         | 2.108043577 | 1           | 0.760854726 | 0.931183153 |
| 0.711377189 | 0.453034382                                         | 0.662548194 | 1           | 1.157263969 | 2.080490008 |
| 1.391747849 | 0.965914281                                         | 1.351952003 | 1           | 1.146986287 | 1.767493298 |
| 1.003791418 | 1.231048529                                         | 1.24982579  | 1.998174025 |             |             |
| YKL007W     | YKL007W::CAP1::capping - addition of actin subunits | 1           |             |             |             |
| 0.894776306 | 1.240648996                                         | 1.151710875 | 1.374580952 | 1           | 1.019079738 |
| 1.211867139 | 1.567373545                                         | 1.27621949  | 1           | 0.966031687 | 1.45574298  |
| 1.922877383 | 1.378320876                                         | 1           | 1.614002881 | 1.601765216 | 1.484146626 |
| 1.743874501 | 1                                                   | 1.736772389 | 1.562390854 | 2.751987139 | 1.96540318  |
| 1.127754164 | 1.827678032                                         | 1.498232366 | 0.845978362 | 1.559188367 | 1           |
| 1.30190447  | 1.891024548                                         | 1.525434637 | 1.202369828 | 1.454672713 | 1           |
| 1.214467495 | 1.574498541                                         | 0.969131483 | 1.10703952  | 1.466286417 | 0.879126451 |
| YGR255C     | YGR255C::COQ6::Involved in ubiquinone biosynthesis  | 1           |             |             |             |
| 0.842028258 | 0.974560283                                         | 1.060854654 | 0.817535654 | 1           | 0.997429408 |
| 1.143218346 | 0.939706592                                         | 0.849648496 | 1           | 1.005689092 | 1.130700939 |
| 1.160283863 | 1.004237548                                         | 1           | 2.207818596 | 1.94922718  | 2.44017903  |
| 1.433891455 | 1                                                   | 2.467022488 | 1.312593942 | 2.149544768 | 1.658782975 |
| 0.993373972 | 1.035311015                                         | 1.055286997 | 1.089519785 | 1.223690781 | 1           |
| 1.023512774 | 0.833066979                                         | 0.800843144 | 0.736410261 | 1.15530445  | 1           |
| 0.98945263  | 0.821509441                                         | 0.903454157 | 1.177433182 | 1.423507897 | 0.991206341 |
| YKL009W     | YKL009W::MRT4::mRna turnover                        | 4           | 0.455576196 | 0.999882228 |             |
| 0.682069076 | 1.162036238                                         | 0.498819937 | 0.676603308 | 1.228256442 |             |
| 1.029630569 | 0.693238386                                         | 1.467718945 | 0.890880016 | 1           |             |
| 0.979397001 | 1.015090865                                         | 0.909175765 | 1.904976388 | 1           | 1.736779655 |
| 3.114675175 | 2.726856897                                         | 1.469514797 | 1           | 0.975379631 | 1.389960998 |
| 0.501612698 | 1.131414924                                         | 1           | 1.657016831 | 3.461257529 | 2.223540826 |
| 2.265885702 | 3.804588999                                         | 1           | 0.966824835 | 2.806542725 | 1.409446127 |
| 1.432538449 | 4.171974307                                         | 1.627784988 |             |             |             |
| YGR257C     | YGR257C::YGR257C::molecular_function unknown        | 1           | 0.904227009 |             |             |
| 0.938949442 | 0.951921011                                         | 0.712361015 | 1           | 0.885646799 | 0.964580131 |
| 1.036546764 | 0.988309982                                         | 1           | 1.099220196 | 0.986669599 | 1.092313495 |

|                    |                                                                                                                                                                                                                                                               |             |             |             |             |   |
|--------------------|---------------------------------------------------------------------------------------------------------------------------------------------------------------------------------------------------------------------------------------------------------------|-------------|-------------|-------------|-------------|---|
| 0.991131216        | 1                                                                                                                                                                                                                                                             | 0.702882011 | 1.078030182 | 1.109088871 | 1.038633618 | 1 |
| 1.471587741        | 0.994955341                                                                                                                                                                                                                                                   | 0.724275307 | 0.835921207 | 1           | 1.206121575 |   |
| 1.411923618        | 1.592782996                                                                                                                                                                                                                                                   | 1.123973709 | 1.127200795 | 1           | 1.407607611 |   |
| 1.43370751         | 1.407190107                                                                                                                                                                                                                                                   | 1.018387535 | 0.887103305 | 1           | 1.658845686 |   |
| 1.520795704        | 1.044661658                                                                                                                                                                                                                                                   | 0.933702127 | 1.030478953 | 1.063883189 |             |   |
| YKL023W            | YKL023W::YKL023W::molecular_function                                                                                                                                                                                                                          | unknown     | 1           | 1.192670164 |             |   |
| 1.396368447        | 1.096232397                                                                                                                                                                                                                                                   | 1.37824843  | 1           | 1.289873286 | 1.183105502 |   |
| 1.344045316        | 1.219602379                                                                                                                                                                                                                                                   | 1           | 1.668989435 | 1.862429902 | 1.660449416 |   |
| 1.355241316        | 1                                                                                                                                                                                                                                                             | 1.477908156 | 1.35270296  | 1.104839489 | 1.269333139 | 1 |
| 1.807004868        | 1.671148868                                                                                                                                                                                                                                                   | 1.821657954 | 1.063315398 | 1           | 1.003031778 |   |
| 0.959134799        | 0.890398352                                                                                                                                                                                                                                                   | 0.886113886 | 1.297902299 | 1           | 1.556368823 |   |
| 1.923237211        | 2.322452229                                                                                                                                                                                                                                                   | 1.667834079 | 1           | 0.939959209 | 1.12400728  |   |
| 0.910250127        | 0.73632234                                                                                                                                                                                                                                                    | 0.922578417 | 1.105913122 |             |             |   |
| YGR259C            | YGR259C::YGR259C::molecular_function                                                                                                                                                                                                                          | unknown     | 1           | 0.87730282  |             |   |
| 0.615840647        | 0.944951539                                                                                                                                                                                                                                                   | 1           | 0.931318523 | 0.98966425  | 0.551407205 |   |
| 0.52058488         | 1                                                                                                                                                                                                                                                             | 1.112300436 | 0.74433896  | 0.333232093 | 0.801543386 |   |
| 4.334344472        | 3.560372506                                                                                                                                                                                                                                                   | 4.774871046 | 1.76588397  | 1           | 1.015521544 |   |
| 0.370564715        | 1                                                                                                                                                                                                                                                             | 0.987550784 | 0.876366385 | 1.105086266 |             |   |
| 1.721043093        | 1.133672134                                                                                                                                                                                                                                                   | 1           | 0.810909446 | 0.386564937 | 0.740760403 |   |
| 1.010374322        | 0.198084905                                                                                                                                                                                                                                                   | 1           | 0.733281338 | 0.357477031 | 0.886722639 |   |
| 0.530837638        | 0.622505781                                                                                                                                                                                                                                                   | 0.614688067 |             |             |             |   |
| YKL025C            | YKL025C::PAN3::76-kDa subunit of Pab1p-dependent poly(A)                                                                                                                                                                                                      |             |             |             |             |   |
| ribonuclease (PAN) | 1                                                                                                                                                                                                                                                             | 0.695520337 | 0.636411136 | 0.757632032 | 0.55759011  | 1 |
| 0.804118824        | 0.871719144                                                                                                                                                                                                                                                   | 0.459555879 | 0.510372482 | 1           | 1.003748736 |   |
| 0.765648386        | 0.584831172                                                                                                                                                                                                                                                   | 0.669253209 | 1           | 1.157772471 | 1.049705682 |   |
| 1.435393203        | 0.920855011                                                                                                                                                                                                                                                   | 1           | 0.695675748 | 0.739331538 | 0.961771914 |   |
| 0.798643489        | 1                                                                                                                                                                                                                                                             | 1.044920588 | 1.097002652 | 0.884412254 | 0.978592883 | 1 |
| 0.925440224        | 0.813944833                                                                                                                                                                                                                                                   | 0.91503256  | 1.000930441 | 0.678514402 | 1           |   |
| 0.905633312        | 1.041787589                                                                                                                                                                                                                                                   | 1.183575092 | 0.513004416 | 1.009953715 | 0.676857354 |   |
| YGR273C            | YGR273C::YGR273C::molecular_function                                                                                                                                                                                                                          | unknown     | 1           | 1.430226181 |             |   |
| 1.52386184         | 1                                                                                                                                                                                                                                                             | 1.084751603 | 1.405152422 | 1           |             |   |
| 1.15519733         | 1                                                                                                                                                                                                                                                             | 1           | 0.965909888 |             |             |   |
| 0.318981745        | 1                                                                                                                                                                                                                                                             | 1.170218032 | 0.252973253 |             |             |   |
| YOL122C            | YOL122C::SMF1::Isolated as high copy suppressor of a cdc1 mutation & involved in high affinity Mn2+ uptake. SMF1 was isolated as a high copy suppressor of a ts mutation in the PEP (mito. matrix protease) gene & may influence PEP-dependent protein import |             |             |             |             |   |
| 1.200888805        | 1.114066733                                                                                                                                                                                                                                                   | 1.009747142 | 1.137923767 | 0.77563026  |             |   |
| 0.912663459        | 1.002715731                                                                                                                                                                                                                                                   | 0.653228412 | 1.057308162 | 1           | 1.390229402 |   |
| 0.59886395         | 1.616372192                                                                                                                                                                                                                                                   | 1.244139959 | 1           | 1.264152697 | 1.174500984 |   |
| 0.699976328        | 1.05488386                                                                                                                                                                                                                                                    | 1           | 1.039038617 | 1.100034655 | 1.238377089 |   |
| 1.344803235        | 1.016164617                                                                                                                                                                                                                                                   | 1           | 0.996838145 | 0.712476911 | 0.741078729 |   |
| 0.673433337        | 0.453538199                                                                                                                                                                                                                                                   | 1           | 0.610277792 | 0.606372903 | 0.610809574 |   |
| 0.480688107        | 0.648837381                                                                                                                                                                                                                                                   |             |             |             |             |   |
| YKL027W            | YKL027W::YKL027W::molecular_function                                                                                                                                                                                                                          | unknown     | 1           | 1.083169819 |             |   |
| 1.08480129         | 1.20648543                                                                                                                                                                                                                                                    | 0.96400342  | 1           | 1.184435642 | 0.978021778 |   |
| 1.226723013        | 1                                                                                                                                                                                                                                                             | 0.804816629 | 0.819411181 | 0.793846649 | 1.302847284 | 1 |
| 0.639836846        | 0.53483587                                                                                                                                                                                                                                                    | 0.848653537 | 1           | 0.860934564 | 0.792498237 |   |
| 1.006530032        | 1.041033524                                                                                                                                                                                                                                                   | 1           | 0.842799444 | 0.796249418 | 0.975677625 |   |
| 1.109567157        | 1.25585658                                                                                                                                                                                                                                                    | 1           | 0.816207485 | 0.800175095 | 0.849788412 |   |
| 0.983126554        | 0.76479072                                                                                                                                                                                                                                                    | 1           | 0.718297852 | 0.752654152 | 1.051084508 |   |
| 0.604132587        | 0.671640013                                                                                                                                                                                                                                                   | 1.056002518 |             |             |             |   |
| YGR275W            | YGR275W::RTT102::Regulator of Ty1 Transposition                                                                                                                                                                                                               |             | 1           | 0.775196462 |             |   |
| 1.233204892        | 0.837078218                                                                                                                                                                                                                                                   | 1.345865705 | 1           | 0.756709212 | 0.774504429 |   |
| 1.289193329        | 1.242436805                                                                                                                                                                                                                                                   | 1           | 0.892912383 | 0.973453773 | 1.119614461 |   |
| 1.078059369        | 0.779984844                                                                                                                                                                                                                                                   | 0.851310105 | 0.994198586 |             |             |   |



|             |                                                 |             |             |             |             |   |
|-------------|-------------------------------------------------|-------------|-------------|-------------|-------------|---|
| 0.780516877 | 0.628363462                                     | 1           | 0.911117689 | 1.050503278 | 0.714056147 |   |
| 0.632465614 | 0.915206264                                     | 1           | 1.177452827 | 1.575012534 | 1.177630549 |   |
| 1.51717164  | 2.013557736                                     | 1           | 0.973681701 | 1.277579563 | 1.238299148 |   |
| 1.653930708 | 1.324714278                                     | 1.321316567 |             |             |             |   |
| YOL124C     | YOL124C::YOL124C::molecular_function            | unknown     | 1           | 1.230406022 |             |   |
| 0.973292131 | 1.280403606                                     | 1.060180982 | 1           | 0.911737873 | 0.828448694 |   |
| 1.132395701 | 1.291456426                                     | 1           | 0.955457008 | 0.70295437  | 0.664879698 |   |
| 1.231052102 | 1                                               | 0.830169388 |             |             |             |   |
| 1           | 0.885471623                                     | 0.914924843 | 1.039179064 | 1.039335146 | 1.099234618 | 1 |
| 0.948175151 | 0.693172178                                     | 0.966457234 | 0.849325933 | 1           | 1.2280606   |   |
| 2.122257162 | 1.162623268                                     | 1.792698954 | 1.132869872 | 1.009594469 |             |   |
| YKL029C     | YKL029C::MAE1::Mitochondrial malic enzyme       | 1           | 1.04939137  |             |             |   |
| 0.593369291 | 0.53920072                                      | 0.222770342 | 1           | 0.818157293 | 0.80589257  |   |
| 0.412811338 | 0.403159124                                     | 1           | 1.564686022 | 0.60847314  | 0.231743058 |   |
| 0.560580754 | 1                                               | 0.460104667 | 0.223353104 | 0.270552867 | 1           |   |
| 0.413496696 | 0.380574362                                     | 0.287113062 | 0.261355454 | 1           | 0.970121799 |   |
| 0.749162726 | 0.918315122                                     | 1.343525769 | 1.038767469 | 1           | 0.721758439 |   |
| 0.595968937 | 0.44056542                                      | 1.564257755 | 1.159838741 | 1           | 0.561608818 |   |
| 0.568035848 | 0.642210459                                     | 0.513608027 | 0.79045299  | 0.612061177 |             |   |
| YOL126C     | YOL126C::MDH2::cytosolic malate dehydrogenase   | 1           | 1.053589869 |             |             |   |
| 0.842120554 | 0.816074637                                     | 0.533336376 | 1           | 0.95175588  | 0.886205353 |   |
| 0.63063018  | 0.574128617                                     | 1           | 0.674669384 | 0.612252675 | 0.611543171 |   |
| 0.888428978 | 1                                               | 1.356807416 | 0.528491751 | 1.225794437 | 0.970691964 | 1 |
| 1.475663273 | 1.103848336                                     | 1.211682554 | 1.744550338 | 1           | 1.160849677 |   |
| 0.827837955 | 1.16697569                                      | 1.143535465 | 0.829178997 | 1           | 0.76391816  |   |
| 0.523954904 | 1.150313741                                     | 1.186909566 | 0.553571903 | 1           | 1.072067855 |   |
| 0.709365415 | 1.270976423                                     | 0.733395685 | 0.53761652  | 0.950052073 |             |   |
| YKL031W     | YKL031W::YKL031W::molecular_function            | unknown     | 1           |             |             |   |
| 1.387004531 | 1.357955458                                     | 1           | 1.099030003 | 1.193213626 | 1.396674684 |   |
| 1.113070888 | 1                                               | 1.308113367 | 1.435788986 | 1           | 0.787165466 |   |
| 0.505080314 | 1.410440924                                     | 1.126828204 | 0.266594245 |             |             |   |
| 0.220688196 | 1                                               | 0.822563902 | 0.872186395 | 0.623730356 | 0.961589281 |   |
| 0.929799762 | 1                                               | 1.069182674 | 1.477893489 | 0.953098841 | 1.407432849 | 1 |
| 0.742005209 | 0.955601997                                     | 0.89135057  | 0.671077308 | 1.018481025 | 0.538508768 |   |
| YGR277C     | YGR277C::YGR277C::molecular_function            | unknown     | 1           | 0.873660613 |             |   |
| 0.997975201 | 0.891706312                                     | 0.993456756 | 1           | 0.884771683 | 0.963650287 |   |
| 0.867822023 | 1.238577135                                     | 1           | 0.905419619 | 1.044504667 | 1.000421451 |   |
| 1.05878541  | 1                                               | 0.92921306  | 0.860187356 | 1.236860067 | 1           |   |
| 1.747977425 | 1.649967736                                     | 1           | 1.078544996 | 1.267055031 |             |   |
| 1.273861423 | 1.041015125                                     | 1.162816871 | 1           | 1.094340949 | 1.433549253 |   |
| 1.41365828  | 0.984377987                                     | 1.030565848 | 1           | 1.204914362 | 0.993882718 |   |
| 0.962674046 | 0.660276577                                     | 0.934158198 | 0.998211347 |             |             |   |
| YGR279C     | YGR279C::SCW4::Soluble Cell Wall protein        | 1           | 1.455156446 |             |             |   |
| 0.796749671 | 0.995915354                                     | 0.55576958  | 1           | 1.164294442 | 1.026278105 |   |
| 0.468921512 | 0.676352222                                     | 1           | 1.680408038 | 0.940167602 | 1.235380056 |   |
| 1.117796563 | 1                                               | 0.537066085 | 0.466408816 | 0.240376369 | 1           |   |
| 0.329282592 | 0.132984002                                     | 0.094756904 | 0.28919073  | 1           | 0.977769025 |   |
| 0.798198472 | 1.263581454                                     | 1.52118396  | 0.551784904 | 1           | 0.520733098 |   |
| 0.62862417  | 0.853927807                                     | 0.949005744 | 0.521777822 | 1           | 0.850393546 |   |
| 0.630735264 | 0.896296496                                     | 0.645596536 | 0.797413036 | 0.628698027 |             |   |
| YOL140W     | YOL140W::ARG8::Acetylornithine aminotransferase | 1           | 1.198445244 |             |             |   |
| 0.881188728 | 1.284128975                                     | 0.571116353 | 1           | 1.032979322 | 0.867793044 |   |
| 1.049553976 | 1                                               | 0.948845025 | 0.996121345 | 0.678155237 | 1.072484679 | 1 |
| 0.976499431 | 0.205947909                                     | 1.3246998   | 0.657875701 | 1           | 0.639530119 |   |
| 0.209744574 | 0.127862565                                     | 0.404571293 | 1           | 0.966488525 | 1.058202054 |   |
| 1.479122641 | 1.623318001                                     | 1.265262698 | 1           | 0.806337938 | 0.510608999 |   |

0.652764908 1.138312859 0.309392585 1 0.780037865 0.767720962  
 1.002268084 0.626526665 0.740821569 0.400160157  
 YGR281W YGR281W::YOR1::multispecific organic anion transporter important for  
 tolerance against toxic environmental organic anions 1 1.504308433  
 1.280521372 1.704577671 1.185457901 1 1.490644708 1.580928436  
 1.321523357 1.209001367 1 1.629385846 1.39946273 1  
 1.328902745 0.481477768 1.045732758 0.706810464 1 0.832308812  
 1.25731439 1 0.992870542 1.159941298 0.87683444  
 1.209648701 0.960294292 1 1.058470185 0.641660262 0.999452477  
 0.568325867 0.446910469 1 0.94619792 0.91382704 0.868267969  
 0.698236689 0.973174891 0.626946802  
 YGR281W YGR281W::YOR1::multispecific organic anion transporter important for  
 tolerance against toxic environmental organic anions  
 0.771492435 0.581693459  
 0.63823362 0.772712694 1  
 0.910414707 0.796125426  
 YOL142W YOL142W::RRP40::Ribosomal RNA Processing 1 1.213462005  
 1.050290043 0.93194946 1.207082331 1 0.956710421 0.81064178  
 1.198452559 1.28846883 1 0.888457681 0.818193823 0.806673022  
 1.095197057 1 0.933205349 0.565832633 0.802713598 1  
 0.861049253 0.79826957 0.693299077 0.93316082 1 1.105266036  
 0.992836604 1.039874717 1.260624632 1.188926862 1 0.777953213  
 0.948571711 0.753561968 0.874328889 1.049268202 1 0.801274518  
 0.860628091 0.859541375 1.228917359 0.683589473 0.960559531  
 YGR283C YGR283C::YGR283C::molecular\_function unknown 1 0.883957638  
 0.817572889 1.08757269 1.209831371 1 0.809297318 0.766575127  
 1.325014768 1.334270396 1 0.568565613 0.404169849 1.399855824  
 1.209856088 1 0.239786421 0.487266673 0.493982143 1  
 1.317121811 1 0.68970663 0.620103319 0.581988801 0.657792446  
 0.865798543 1 0.627714791 0.90318684 0.750623152 1.338447782  
 1.484706999 1 0.667372758 0.744024475 1.080417295 0.66767141  
 0.775303436 1.046370726  
 YOL144W YOL144W::NOP8::Nucleolar protein required for 60S ribosome  
 biogenesis 1 0.888794272 1.06680127 0.847683418 1.058215429 1  
 0.753181386 0.759988174 1.093401362 1.076402787 1 0.658173117  
 0.684851752 0.894385122 0.901099463 1 0.48652049 0.275020493  
 0.358343302 0.734448289 1 1.90196939 2.700358658 2.402281331  
 1.608147144 1 0.734431725 0.749557023 0.640285921 0.61444763  
 0.864962288 1 1.020646307 1.110693591 0.780304321 1.346464557  
 2.005559839 1 0.65386476 1.137508907 0.890089331 0.739310369  
 2.983251025  
 YOL146W YOL146W::YOL146W::molecular\_function unknown 1 1.014204506  
 1.212026462 0.931612456 1.559371685 1 0.837993922 0.799287895  
 1.361475572 1.406783845 1 0.74158948 0.942689678 1.245071735  
 1.394645176 1 0.938550227 0.682171391 0.72818229 1.11398628 1  
 1.513422671 1.5515574 1.414664425 1.485219634 1 0.868900343  
 0.849604699 0.652372266 0.972327383 1 0.877859739 1.214496066  
 1.254478688 1.076159617 1.332178066 1 1.088397841 1.178575765  
 0.947537911 1.120310162 1.245060987 1.263525396  
 YOL148C YOL148C::SPT20::Transcription factor 1 1.013566705  
 0.947778414 1.181600953 0.85248467 1 1.050181655 1.034929651  
 1.128250843 0.921596221 1 1.073101624 1.253262865 0.845337912  
 1.121129024 1 1.24922128 1.501401336 1.730810578 0.997768994 1  
 1.396658066 0.888673054 0.977847173 1.003820235 1  
 1.247138951 1.050066826 1.367528979 1 0.891303235 0.789904784

|          |                                                                                                                            |             |             |             |             |             |             |
|----------|----------------------------------------------------------------------------------------------------------------------------|-------------|-------------|-------------|-------------|-------------|-------------|
|          | 1.083815264                                                                                                                | 1.079343411 | 0.727637877 | 1           | 0.666738864 | 0.951779563 |             |
|          | 0.920997583                                                                                                                | 0.616772928 | 0.792216049 | 0.789812857 |             |             |             |
| YOL150C  | YOL150C::YOL150C::molecular_function unknown                                                                               |             |             |             |             | 1           | 1.042163686 |
|          | 1.531606996                                                                                                                | 1.019930868 | 1.698736473 | 1           | 1.109517362 | 1.022872956 |             |
|          | 2.293523698                                                                                                                | 1.976523598 | 1           | 5.634210071 | 5.905533301 | 5.06684801  |             |
|          | 1.725768663                                                                                                                | 1           | 11.45555303 | 10.63876886 | 10.24844505 | 6.113467017 |             |
|          | 19.17178978                                                                                                                | 43.5303521  | 19.64022345 | 7.093339872 | 1           | 2.32540533  |             |
|          | 4.199348462                                                                                                                | 1.323600667 | 0.363697994 | 0.387492438 | 1           | 3.627249221 |             |
|          | 7.928928608                                                                                                                | 3.085383537 | 0.634946577 | 0.750298893 | 1           | 3.512415945 |             |
|          | 9.694051279                                                                                                                | 2.103053055 | 0.761023094 | 0.887244544 | 6.423577634 |             |             |
| YOL164W  | YOL164W::YOL164W::molecular_function unknown                                                                               |             |             |             |             |             | 0.998573744 |
|          | 0.920164976                                                                                                                | 1.127091186 | 0.643182638 |             | 1.030329541 | 1.056009048 |             |
|          | 1.035825767                                                                                                                |             | 1.007908382 | 1.170892712 | 0.893952973 | 1.033812378 |             |
|          | 0.989559422                                                                                                                | 1.26736098  |             | 1           | 0.71896128  | 0.853715152 |             |
|          | 0.71191753                                                                                                                 | 1           | 1.151737991 |             | 1.583875084 | 1           |             |
|          | 0.97920981                                                                                                                 | 0.669187859 | 0.888192756 | 0.938120912 | 0.592953741 |             |             |
|          | 1.066963176                                                                                                                | 0.907332196 | 1.039562905 | 0.521023619 | 0.898791754 | 0.782807851 |             |
| YML086C  | "YML086C::ALO1::D-arabinono-1,4-lactone oxidase"                                                                           |             |             |             |             |             | 1           |
|          | 0.890204754                                                                                                                | 0.79671753  | 0.722484175 | 0.432388122 | 1           | 0.891520897 |             |
|          | 0.948976097                                                                                                                | 0.710932226 | 0.643287024 | 1           | 1.036803944 | 1.019149983 |             |
|          | 0.89873556                                                                                                                 | 0.641072642 | 1           | 1.398698198 | 1.083441998 | 1.173779135 |             |
|          | 0.933988479                                                                                                                | 1           | 1.381427391 | 1.211359462 | 1.269380195 | 0.973553135 |             |
|          | 1.296614543                                                                                                                | 1.313336975 | 1.557804698 | 1.162731546 | 0.958784445 | 1           |             |
|          | 1.01658861                                                                                                                 | 0.955334017 | 1.040107499 | 0.846468026 | 0.585755146 | 1           |             |
|          | 1.145167477                                                                                                                | 0.98816506  | 1.014235211 | 0.8728582   | 0.744636429 | 0.943922628 |             |
| YMR294WA | YMR294WA::YMR294W-A::molecular_function unknown                                                                            |             |             |             |             | 1           | 1.472921372 |
|          | 1.456953407                                                                                                                | 0.955194429 | 2.102087982 | 1           | 1.022737128 | 0.927835197 |             |
|          | 1.859397654                                                                                                                | 1.678002313 | 1           | 1.04635718  | 1.158647389 | 1.701988796 |             |
|          | 1.564593636                                                                                                                | 1           | 1.369577155 | 0.961649632 | 1.233062841 | 1.446114168 |             |
|          | 1.734915717                                                                                                                | 2.628485831 | 1.843932327 | 1.206469514 | 1           | 0.763140461 |             |
|          | 0.697179772                                                                                                                | 0.531055358 | 0.72484721  | 0.671310545 | 1           | 0.88034547  |             |
|          | 1.0524462                                                                                                                  | 0.752221591 | 0.747515931 | 1.240132579 | 1           | 1.149738805 |             |
|          | 1.467820904                                                                                                                | 1.28292285  | 1.925081887 | 2.098586211 | 1.630411878 |             |             |
| YKL033W  | YKL033W::YKL033W::molecular_function unknown                                                                               |             |             |             |             |             | 1.052750408 |
|          | 0.832475965                                                                                                                | 1.436817573 | 0.883030048 |             | 1.070283556 | 1.139022069 |             |
|          | 0.855937117                                                                                                                | 0.859884051 |             | 1.16705177  | 0.951945275 | 0.548057468 |             |
|          | 1.300097343                                                                                                                | 1           | 0.852401523 | 0.67933814  | 0.855751659 | 1           |             |
|          | 0.841618681                                                                                                                |             |             | 1           | 0.779940059 | 0.795336253 |             |
|          | 0.986844889                                                                                                                | 1.007725361 | 1           | 0.710239504 | 0.891987454 | 0.717082041 |             |
|          | 0.910546871                                                                                                                | 0.623087728 | 1           | 0.906360249 | 0.932984237 | 0.958792704 |             |
|          | 0.803429191                                                                                                                | 0.831144209 | 0.643583653 |             |             |             |             |
| YKL047W  | YKL047W::YKL047W::molecular_function unknown                                                                               |             |             |             |             | 1           | 0.895744143 |
|          | 0.918933491                                                                                                                | 0.932580693 | 1.135135885 | 1           | 0.761160126 | 0.808633534 |             |
|          | 1.078135506                                                                                                                | 1.024998028 | 1           | 0.823357843 | 0.898573939 | 1.10254658  |             |
|          | 1.001443568                                                                                                                | 1           | 1.293090153 | 0.748221941 | 0.997192939 | 1.387375394 |             |
|          | 2.757644273                                                                                                                | 4.300006538 | 3.303139785 | 2.420493318 | 1           | 1.037782078 |             |
|          | 1.19222336                                                                                                                 | 1.067463978 | 0.874447629 | 1.151862195 | 1           | 1.603388896 |             |
|          | 2.141157806                                                                                                                | 1.952018412 | 1.396849031 | 1.78369953  | 1           | 0.962063476 |             |
|          | 0.938398141                                                                                                                | 1.308884821 | 1.117183442 | 1.196977994 |             |             |             |
| YKL049C  | YKL049C::CSE4::Required for proper kinetochore function; may be involved in assembly of a CEN-specific chromatin structure |             |             |             |             | 1           | 1.039074867 |
|          | 1.144809415                                                                                                                | 1.102644003 | 1.284855129 | 1           | 1.123029549 | 0.98468548  |             |
|          | 1.386242236                                                                                                                | 1           | 1.085157104 | 1.209941278 | 1.349314679 | 1.480304965 |             |
|          | 1.337863727                                                                                                                | 1.762045459 | 0.766754504 | 0.922886422 | 1           | 1.539822653 |             |
|          | 1.900467908                                                                                                                | 1.299073055 | 0.89077802  | 1           | 1.134611612 | 1.23099844  |             |
|          | 1.132480635                                                                                                                | 0.84222476  | 1.173815574 | 1           | 1.007438583 | 1.358394549 |             |

|         |                                                                                 |             |             |             |             |             |             |
|---------|---------------------------------------------------------------------------------|-------------|-------------|-------------|-------------|-------------|-------------|
|         | 1.425865802                                                                     | 1.68006568  | 1.458708274 | 1           | 0.963077295 | 1.411641761 |             |
|         | 1.15483129                                                                      | 1.245186711 | 1.331040281 | 1.17596308  |             |             |             |
| YHL001W | YHL001W::RPL14B::Homology to mammalian L14                                      |             |             |             |             | 1           | 1.412388147 |
|         | 1.407091808                                                                     | 0.800101872 | 1.526154205 | 1           | 1.022425263 | 0.95035109  |             |
|         | 1.307081183                                                                     | 1.146487496 | 1           | 0.95358368  | 0.785749101 | 1.85108667  |             |
|         | 1.044907546                                                                     | 1           | 0.664875936 | 0.374696493 | 0.262414697 | 0.551683181 | 1           |
|         | 1.346285039                                                                     | 1.025146477 | 0.564871292 | 0.71189199  | 1           | 1.094807823 |             |
|         | 0.879577842                                                                     | 0.545084117 | 0.978223362 | 0.94656555  | 1           | 1.105174736 |             |
|         | 1.426158263                                                                     | 0.929525778 | 0.571033425 | 1.69683705  | 1           | 0.980508188 | 1.261776    |
|         | 0.64887483                                                                      | 1.588881347 | 0.979338075 | 1.179465531 |             |             |             |
| YKL051W | YKL051W::YKL051W::molecular_function unknown                                    |             |             |             |             | 1           | 1.183109013 |
|         | 0.839104178                                                                     | 1.070321528 | 0.879141711 | 1           | 1.031029826 | 1.071410506 |             |
|         | 0.777521987                                                                     | 1           | 2.107185546 | 1.640579008 | 1.236722843 | 0.762354498 | 1           |
|         | 1.810472685                                                                     |             | 1.915364828 | 0.682280645 | 1           | 1.971891683 | 2.361734235 |
|         | 1.418761071                                                                     | 1.188636038 | 1           | 1.33224843  | 1.477686086 | 1.54472115  |             |
|         | 1.209930804                                                                     | 0.765228533 | 1           | 1.153859752 | 1.193035457 | 1.58801043  |             |
|         | 1.199311762                                                                     | 0.846367528 | 1           | 1.263221426 | 1.246147643 | 0.944878657 |             |
|         | 0.823731033                                                                     | 1.006722712 | 0.915902707 |             |             |             |             |
| YHL003C | YHL003C::LAG1::YKL008C                                                          |             |             |             |             | 1           | 1.496999714 |
|         | 1.290183157                                                                     | 1           | 1.412328232 | 1.087923872 | 1.096228507 | 1.017843751 | 1           |
|         | 1.112090119                                                                     | 0.862694336 | 1.202694954 | 1.122470761 | 1           | 1.158595648 |             |
|         | 0.168277118                                                                     |             | 0.67650478  | 1           | 0.942663379 | 0.590030746 | 1           |
|         | 1.059203153                                                                     | 1.23241217  | 1.327478475 | 1.357292173 | 1.058371403 | 1           |             |
|         | 0.831498056                                                                     | 0.916405207 | 0.881912597 | 0.55898834  | 0.750119567 | 1           |             |
|         | 0.945589318                                                                     | 0.979620717 | 0.963007114 | 1.012152621 | 1.352496803 | 0.854609034 |             |
| YKL053W | YKL053W::YKL053W::molecular_function unknown                                    |             |             |             |             | 1           | 1.037110591 |
|         | 1.233644603                                                                     |             | 0.972558353 | 1           | 0.812917518 | 0.931180345 |             |
|         | 1.078914417                                                                     | 1           | 1.287534372 | 1.326521834 | 2.091436688 | 1           |             |
|         | 0.816245923                                                                     | 0.680158593 | 0.846702158 | 0.946096385 | 1           | 2.534836019 |             |
|         | 4.754549698                                                                     | 3.910248171 | 1.48643057  | 1           | 1.019487718 | 1.207890877 |             |
|         | 0.857087567                                                                     | 0.803672081 | 0.775555008 | 1           | 1.083397607 | 1.371892578 |             |
|         | 1.103687873                                                                     | 1.503792382 | 1.726933949 | 1           | 0.85723122  | 1.006154252 |             |
|         | 1.019041667                                                                     | 0.97968327  | 1.040822972 | 1.168958073 |             |             |             |
| YHL005C | YHL005C::YHL005C::molecular_function unknown                                    |             |             |             |             | 1           | 1.094158262 |
|         | 1.052677014                                                                     | 1.002638936 | 0.899277468 | 1           | 0.96704412  | 1.196331859 |             |
|         | 0.893370544                                                                     | 0.962513409 | 1           | 0.93796148  | 1.217871407 | 1.060650059 | 1           |
|         | 0.951620779                                                                     |             | 1.288140423 | 1.225064494 | 1           | 2.04272281  | 2.888307991 |
|         | 3.604702324                                                                     | 2.363710306 | 1           | 1.200686825 | 1.054245241 | 1.015777453 |             |
|         | 1.292784621                                                                     | 1.137060201 | 1           |             | 0.75306033  | 0.697381912 | 0.634552986 |
|         | 0.863675623                                                                     | 1           | 0.967040053 |             | 0.991792718 | 0.509326601 |             |
|         | 0.867743381                                                                     |             |             |             |             |             |             |
| YKL055C | YKL055C::OAR1::3-oxoacyl-[acyl-carrier-protein] reductase                       |             |             |             |             | 1           |             |
|         | 0.983753965                                                                     | 0.829040678 | 1.230182615 | 0.810973001 | 1           | 1.022873482 |             |
|         | 1.089681687                                                                     | 1           | 1.033178776 | 0.834090892 | 0.565445272 | 1.144029173 |             |
|         |                                                                                 | 0.725160671 |             |             |             | 1           | 0.710175287 |
|         | 0.820107777                                                                     | 0.80226496  | 0.99419472  | 0.764202588 | 1           | 0.918937356 |             |
|         | 0.701231675                                                                     | 0.796513363 | 1.173206078 |             | 1           | 0.820152599 |             |
|         | 0.958185411                                                                     |             | 0.99603243  |             |             |             |             |
| YHL007C | YHL007C::STE20::Involved in pheromone response and pseudohyphal growth pathways |             |             |             |             | 1           |             |
|         | 0.895750303                                                                     | 0.867437113 | 0.688474978 | 0.729085482 | 1           | 0.910649413 |             |
|         | 0.832592526                                                                     | 0.51270238  | 0.963486815 | 1           | 0.764664876 | 0.781649462 |             |
|         | 0.604808234                                                                     | 1           | 0.633390682 | 0.692019361 | 0.523255558 | 0.620951497 | 1           |
|         | 0.915202159                                                                     | 0.814196181 | 0.89610918  | 0.883393568 | 0.808390548 | 1           |             |
|         | 1.000340043                                                                     | 0.778615781 | 0.851376593 | 0.940763182 | 0.667404377 | 1           |             |
|         | 0.969657274                                                                     | 1.121735868 | 0.909223007 |             | 0.647727246 | 0.915027042 |             |

YKL057C YKL057C::NUP120::Nucleoporin 1 1.578492951 1.095714223  
1.640337088 1.218797164 1 1.707350257 1.49666184 0.949773409 1  
1.442032132 1.061018284 0.610045123 1.180006111 2.063397379  
1.045780635 0.715962716 1 0.84679968  
0.787029022 0.658227319 1.027332925 1.092685171 1 0.740800214  
0.51466738 0.710568226 0.635608706 0.34254308 1 0.755922093  
0.600104988 0.712733256 0.666043658 0.656229496 0.797693476  
YHL009C YHL009C::YAP3::bZIP protein; transcription factor  
0.898527373 0.856597875 1.054446696 0.852449917  
0.870466307 1.067236393 0.808647639 1.051434187 1  
1.127644538 1.024112216 1 1.078211143 0.987515922 0.741480439  
0.971448459 1 1.157812485 1.065598242 1.212416684 1.074691825  
1.226919265 1 1.075136704 1.264510926 1.038143883 0.929463584  
1.009850937 1 1.222255607 1.358277005 0.798760378 1.283619175  
1.075266311  
YOL166C YOL166C::YOL166C::molecular\_function unknown 1  
1.374432718 1.359346118 1.272176069 1 1.261882251 1.136716279  
1.447185276 1.278626088 1 1.300878866 1.54604368 1  
1 0.828681216 0.859199041 0.352852082  
0.768068628 1.233337371 0.817353749 0.620053058 1  
1 -0.121001246 1.135684372  
YKL071W YKL071W::YKL071W::molecular\_function unknown 1 1.10608331  
1.036579823 0.932157349 0.88691745 1 1.049507199  
0.767319825 1 1.329181838 1.095926482 0.750524414 0.937736563 1  
0.880734278 0.764357038 0.742176925 0.830274256 1 1.798241278  
2.101341109 1.814297618 1.696336878 1 1.063062444 1.349280689  
1.383969185 1.00335714 1.025844597 1 1.009578711 1.745370289  
1.802374787 0.893101901 0.872286684 1 1.253927283 1.904329249  
1.213460939 1.006544628 1.196192842 1.593635726  
YOR002W YOR002W::ALG6::Required for glucosylation in the N-linked  
glycosylation pathway 1 0.856821633 0.462276994 0.814517131 0.459262881 1  
0.829104352 0.709945425 0.461873472 0.525558805 1 0.790264837  
0.707782466 0.379938843 0.644256894 1 1.661304342 1.310705362  
0.633483107 1 0.847425377 0.789372309 0.496941243 0.786566724 1  
1.164468937 1.164797122 1.310565106 1.373805186 1.034715547 1  
0.64413436 0.658678942 0.939114312 0.721800759 0.465706536 1  
0.805182118 0.613597094 0.735190442 0.54670487 0.583129859 0.802071592  
YKL073W YKL073W::LHS1::Lumen HSP Seventy<br> Required for efficient  
translocation of protein precursors across the ER membrane 1 1.417503427  
1.186655487 1.542773057 1.332450974 1 1.390354948 1.277127466  
0.888614273 1 1.304794336 1.077824428 0.599589145 1.422529533  
0.873635647 0.9434551 1 0.774798912 0.704375624 1  
1.183160716 1.053314893 0.887197053 1.248406539 1.13921714 1  
1.112195345 0.810816846 1.318806207 0.903933039 0.536544585 1  
0.925280063 0.783843505 0.897004438 0.696236083 0.624058475 0.800320314  
YHL011C YHL011C::PRS3::ribose-phosphate pyrophosphokinase 3 1  
1.40288956 0.869539228 0.956871105 0.75719488 1 0.995279954  
0.869161396 0.888178304 1.035743303 1 0.853605318 0.63245689  
0.40904593 1.085334903 1 0.554047425 0.213759459 0.591513607 1  
0.638922874 0.142428453 0.138742 0.735114402 1 1.011790063  
0.687433733 1.061840574 1.129437437 0.981017127 1 0.789651625  
0.512073022 0.496613808 0.768318593 0.73076488 1 0.808318494  
0.545000018 0.822957364 0.514556765 0.45814725 1.041116945  
YKL075C YKL075C::YKL075C::molecular\_function unknown 1 0.889071108  
0.984943062 1.087668054 1.071564675 1 0.976297818 1.35370449  
1.208965464 1 0.871750552 0.893673269 1.104036128 1.26419842 1  
0.617890142 0.575513849 0.915843729 1 1.427746014

|         |                                                                                                                                                                                                                       |             |             |             |             |             |             |
|---------|-----------------------------------------------------------------------------------------------------------------------------------------------------------------------------------------------------------------------|-------------|-------------|-------------|-------------|-------------|-------------|
|         | 1.546127727                                                                                                                                                                                                           | 1           | 0.923728526 | 0.98212081  | 0.939687439 | 0.915697484 |             |
|         | 1.131023555                                                                                                                                                                                                           | 1           | 1.06099564  | 0.879491472 | 0.97873543  | 0.91214474  |             |
|         | 1.003727797                                                                                                                                                                                                           | 1           | 0.821010211 | 0.971901049 | 0.968555336 | 0.980022226 |             |
|         | 2.095368133                                                                                                                                                                                                           |             |             |             |             |             |             |
| YHL025W | YHL025W::SNF6::Involved in global regulation of transcription                                                                                                                                                         |             |             |             |             |             | 1           |
|         | 1.145627834                                                                                                                                                                                                           | 1.113775483 | 0.824176058 | 1           | 1.255686211 |             |             |
|         | 1.18066666                                                                                                                                                                                                            | 1           | 1.050054338 | 1.175647424 | 1.308122042 | 1.26540127  | 1           |
|         | 1.317699503                                                                                                                                                                                                           | 1.127765381 | 1           | 0.764470295 | 0.688263782 |             |             |
|         | 0.813217932                                                                                                                                                                                                           | 1           | 0.98456307  | 1.006109948 | 1.123527998 | 1.090060735 |             |
|         | 1.20255416                                                                                                                                                                                                            | 1           | 0.793653775 | 0.851994696 | 0.936466462 | 1.034811147 |             |
|         | 1.378467149                                                                                                                                                                                                           | 1           | 1.306952226 | 1.264203938 | 1.706411382 | 0.922160599 |             |
|         | 1.686594215                                                                                                                                                                                                           | 0.947425183 |             |             |             |             |             |
| YOR004W | YOR004W::YOR004W::molecular_function unknown                                                                                                                                                                          |             |             |             |             |             | 0.972716756 |
|         | 0.856391107                                                                                                                                                                                                           | 0.980614013 | 1.122877399 | 0.825716473 | 0.811704323 |             |             |
|         | 1.245481197                                                                                                                                                                                                           | 1.292304097 | 0.835502998 | 0.707612704 | 1.011978152 |             |             |
|         | 1.342193969                                                                                                                                                                                                           | 1           | 1.029599832 | 1.124489636 | 0.875171021 | 1           |             |
|         | 0.885135682                                                                                                                                                                                                           | 0.89032812  | 0.896700299 | 1.075267614 | 1           | 0.857260921 |             |
|         | 0.73266352                                                                                                                                                                                                            | 0.888021881 | 1.271185846 | 0.96052036  | 1           | 0.926183304 |             |
|         | 0.91107452                                                                                                                                                                                                            | 0.823615698 | 1.221610446 | 1.236479647 | 1           | 0.676710518 |             |
|         | 1.004935197                                                                                                                                                                                                           | 1.303381596 | 1.464909328 | 0.962792538 | 0.666349844 |             |             |
| YHL027W | YHL027W::RIM101::Regulator of IME2 (RIM)<br>Rim101p is similar to the Aspergillus Phenotype-response regulator PacC and the Yarrowia proteinase YlRim1010p; transcriptional activator required for entry into meiosis |             |             |             |             |             | 1           |
|         | 1.232922058                                                                                                                                                                                                           | 0.992509616 | 1.198678808 | 0.831640206 | 1           | 1.205319932 |             |
|         | 1.377346626                                                                                                                                                                                                           | 1.008874791 | 0.953478835 | 1           | 1.355342598 | 1.278546007 |             |
|         | 0.793621556                                                                                                                                                                                                           | 1.356974101 | 1           | 1.12628892  | 1.124959806 | 0.931905254 |             |
|         | 0.831611343                                                                                                                                                                                                           | 1.230524567 | 0.875565468 | 0.821425444 | 0.995814753 | 1           |             |
|         | 0.52541332                                                                                                                                                                                                            | 0.772332866 | 0.753427186 |             | 0.656425358 |             |             |
|         | 1.969148105                                                                                                                                                                                                           |             |             | 1.124913251 |             | 1.049754681 |             |
| YHL027W | YHL027W::RIM101::Regulator of IME2 (RIM)<br>Rim101p is similar to the Aspergillus Phenotype-response regulator PacC and the Yarrowia proteinase YlRim1010p; transcriptional activator required for entry into meiosis |             |             |             |             |             | 1           |
|         | 1.013141071                                                                                                                                                                                                           | 1.035918566 | 0.992404283 | 1.124309795 | 1.026615242 | 1           |             |
|         | 0.734376477                                                                                                                                                                                                           | 0.674366417 | 0.789556543 | 0.853762946 | 0.749721727 | 1           |             |
|         | 1.041885187                                                                                                                                                                                                           | 0.908883689 | 0.970560296 | 0.651649936 | 1.01099186  | 0.746907259 |             |
| YOR006C | YOR006C::YOR006C::molecular_function unknown                                                                                                                                                                          |             |             |             |             |             | 1           |
|         | 1.192793306                                                                                                                                                                                                           | 1.194487325 | 1           | 1.029311345 | 0.951728363 |             |             |
|         | 1.360110209                                                                                                                                                                                                           | 1           | 1.084017743 | 1.256041234 | 1.669024383 | 1.326347438 | 1           |
|         | 1.322838036                                                                                                                                                                                                           | 1.345374849 | 1.130609929 | 1           | 1.682109327 | 2.129367819 |             |
|         | 1.606149087                                                                                                                                                                                                           | 1.090397156 | 1           | 0.880979351 | 1.064667881 | 1.031677472 |             |
|         | 0.936103722                                                                                                                                                                                                           | 1.031438449 | 1           | 1.047929149 | 1.011107126 | 0.928482822 |             |
|         | 1.093999258                                                                                                                                                                                                           | 0.864986948 | 1           | 0.982708513 | 1.182742227 | 0.971516403 |             |
|         | 1.002046816                                                                                                                                                                                                           | 0.710431066 | 1.102410567 |             |             |             |             |
| YHL029C | YHL029C::YHL029C::molecular_function unknown                                                                                                                                                                          |             |             |             |             |             | 1           |
|         | 0.826926915                                                                                                                                                                                                           | 1.019118324 | 0.797618099 | 1           | 1.121791002 | 0.982299469 |             |
|         | 0.727249396                                                                                                                                                                                                           | 0.897194969 | 1           | 1.067286893 | 0.873495886 | 1.293386906 |             |
|         | 1.784571298                                                                                                                                                                                                           | 1           | 0.601577224 | 0.306479625 | 0.620348175 | 0.514338019 | 1           |
|         | 0.520042244                                                                                                                                                                                                           | 0.853112063 | 1           | 0.736655026 | 0.675256045 |             |             |
|         | 0.76831329                                                                                                                                                                                                            | 0.891199497 | 0.756689233 | 1           | 0.812632074 | 0.733910571 |             |
|         | 0.836729559                                                                                                                                                                                                           | 0.887693899 | 0.80042623  | 1           | 0.722496355 | 0.651654309 |             |
|         | 0.865259097                                                                                                                                                                                                           | 0.615948207 | 0.77533486  | 0.577036198 |             |             |             |
| YOR008C | YOR008C::SLG1::cell wall integrity and stress response component                                                                                                                                                      |             |             |             |             |             | 1           |
|         | 1                                                                                                                                                                                                                     | 1.280532284 | 0.845765595 | 1.29383252  | 0.936219319 | 1           | 1.210841989 |
|         | 1.122519225                                                                                                                                                                                                           | 0.804954228 | 1.003115481 | 1           | 1.32213019  | 1.203487581 |             |

0.870866669 1.396167262 1 1.432653244 0.265818065 1.042401212  
 0.956767081 1 1.273583534 0.465217664 0.802018867 1.519192156 1  
 1.339679606 1.237789669 1.807277369 1.494741463 1.204347663 1  
 1.165892824 0.722055677 0.981494075 0.8342158 0.449118463 1  
 0.909524701 0.878408563 1.007763843 0.813955229 0.796793413 0.797693476  
 YHL031C YHL031C::GOS1::SNARE protein with a C-terminal membrane  
 anchor<br><U>GO</U>lgi <U>S</U>nare 1 0.972058976 1.252838733 1.022956334  
 1.374132833 1 1.157690978 1.101918829 1.27449062 1  
 1.36070345 1.285707118 0.906701606 0.8069295  
 1.087861521 1 1.752012339 1.546823157 1.499408099 1.443409339 1  
 1.188235869 1.313670099 0.824272708 0.676498328 0.943227932 1  
 1.161230437 1.713282354 1.412181134 0.881152947 1.371829352 1  
 1.697659777 0.767235488 1.249416616 1.375361555 1.322192232  
 YOR022C YOR022C::YOR022C::molecular\_function unknown 1 0.812226879  
 0.977032044 0.798830603 1 1.022568202 1.121385295  
 0.80906419 1 1.402124552 1.472089918 0.93014723 1  
 1.39025281 1.54304176 1.060782275 1 1.474515988 2.502810216  
 1.317305186 1.216617712 1 1.02374547 1.383782484 1.219309665  
 1.123533895 1.070917899 1 1.335162176 1.312072428 1.532667964  
 1.393212362 1 1.181214665 1.476839493 1.139485498 0.891742501  
 0.596126938 1.116420579  
 YOR024W YOR024W::YOR024W::molecular\_function unknown 1 1.013216236  
 1.006882041 0.887806012 1.033005315 1 0.884354784 0.842916034  
 1.019873723 1.022448562 1 1.008825762 1.031750687 1.043209597 1  
 1.309989954 3.440581862 0.815417047 1.185608012 1 1.465236898  
 1.882378312 1.261629094 1.140589748 1 1.06553758 1.169770978  
 1.08157357 1.047406233 1.060599879 1 1.146045544 1.250000375  
 0.98884439 0.944130654 1.156297323 1 0.841235081 1.361429391  
 1.078701841 1.718407956 1.102646605 1.142689274  
 YOR026W YOR026W::BUB3::Protein required for cell cycle arrest in response to  
 loss of microtubule function 1 0.77148181 0.849998543 0.806657196  
 0.852063642 1 0.791845673 0.822559483 0.851134197 0.903141769 1  
 0.692205848 0.637205397 0.837197276 0.94820494 1 0.667809858  
 0.397869348 0.614249243 0.876503974 1 0.871075394 0.867684017  
 0.950316665 0.961452917 1 1.268240799 0.869542596 1.125026551  
 1.003844324 1.309388416 1 1.149921005 1.109474848 0.883780349  
 0.972458926 1.170011732 1 1.028812964 1.115106337 0.894116496  
 1.174114796 0.780967005 1.044619396  
 YOR028C YOR028C::CIN5::Protein involved in silencing 1 1.185991199  
 1.496751165 0.971938026 0.941677612 1 1.140905333 0.986296938  
 1.077365866 0.81827022 1 2.152616665 2.352366026 1.776826332  
 1.192134601 1 4.894548685 2.834293409 1.431306202  
 0.776043992 1 1.623867856 2.05738088 0.974978907  
 1.149872959 1 1.652435157 1.438846334 2.016192429 0.677744142  
 0.718629778 1.170364247 1.341025617 0.747609455 0.595015151  
 0.836441049 1.025355707  
 YOR030W "YOR030W::DFG16::Involved in cell wall maintenance, filamentous  
 growth" 1 1.352489613 1.403434156 1.599913279 1 1.263919442  
 1.359611845 1.809846818 1.492949623 1 1.942854916  
 1.798244324 0.604034674 0.945721383  
 0.795458947 0.964861313 0.847391082 0.882235975 1  
 1.092895612 0.683785686 1.050128493 1.041415858 0.802572471 1  
 0.915990054 1.028519473 0.780709254 0.631690197 0.668809171 1.574371933  
 YKL077W YKL077W::YKL077W::molecular\_function unknown 1 0.907563592  
 0.550109123 0.927299368 0.861615331 1 0.783579377 0.691123024  
 0.948660614 0.780587385 1 0.786877814 0.610970169 0.548951272  
 0.914432822 1 0.663931033 0.506662754 0.59123231 0.694507778 1

|             |                                                                           |             |             |             |             |
|-------------|---------------------------------------------------------------------------|-------------|-------------|-------------|-------------|
| 0.797413671 | 0.452451042                                                               | 0.931132408 | 1.309166522 | 1           | 1.178313991 |
| 1.243087844 | 1.21941756                                                                | 1.142168695 | 1.009154722 | 1           | 0.989994837 |
| 1.229949572 | 1.256692459                                                               | 0.851571029 | 0.967457126 | 1           | 1.04346745  |
| 1.085070641 | 1.171561477                                                               | 1.044201636 | 1.121012501 | 1.219744238 |             |
| YKL079W     | "YKL079W::SMY1::not believed to act as a kinesin, colocalizes with Myo2p" |             |             |             |             |
|             | 0.763397946                                                               | 1.093546771 | 0.916314974 | 0.951632224 |             |
| 0.941313367 | 0.765838452                                                               | 0.875991403 | 0.731818616 | 0.919156092 |             |
| 0.835524659 | 1.036749366                                                               | 1           | 1.601357433 | 0.643974721 |             |
| 0.884766909 | 0.797290146                                                               |             | 1           | 1.141557559 | 1.35828693  |
| 1.067311103 | 0.935369332                                                               | 1.066756415 | 1           | 1.393829101 | 1.079610928 |
| 1.11455174  | 1.058178418                                                               | 1           | 1.387109012 | 1.236050418 | 1.119766967 |
| 1.11297769  | 1.346189453                                                               | 0.828340286 |             |             |             |
| YKL081W     | YKL081W::TEF4::Translation elongation factor EF-1gamma 1                  |             |             |             |             |
| 1.098380707 | 0.665028196                                                               | 0.492239845 | 0.380490459 | 1           | 1.002003302 |
| 0.903361586 | 0.411636507                                                               | 0.38093978  | 1           | 0.97991272  | 0.728112103 |
| 0.417273261 | 0.37355715                                                                | 1           | 1.172912219 | 0.914517501 | 0.630407819 |
| 0.621186533 | 1                                                                         | 0.835287673 | 0.338084568 | 0.292703578 | 0.570578219 |
| 1.110136633 | 0.734077348                                                               | 1.330445445 | 1.447793511 | 1.145936557 | 1           |
| 0.867914576 | 0.718588085                                                               | 0.507590961 | 0.434183843 | 0.441804633 | 1           |
| 0.948568891 | 0.663443429                                                               | 0.756262779 | 0.714669506 | 0.455073538 | 0.760917271 |
| YHL033C     | "YHL033C::RPL8A::Homologous to human L7a, mouse L7a, and rat L7a" 1       |             |             |             |             |
| 1.392974396 | 1.037401967                                                               | 1.173290481 | 1.274341391 | 1           | 1.093446552 |
| 1.164545764 | 1.336643661                                                               | 1           | 1.138427493 | 0.89847528  | 0.863877581 |
| 1.167751996 | 1                                                                         | 0.651587834 | 0.138082958 | 0.166078712 | 0.371055353 |
| 1.038574096 | 0.288803452                                                               | 0.169978658 | 0.776388422 | 1           | 1.057099362 |
| 0.966711108 | 0.757971898                                                               | 1.108550182 | 1.136559725 | 1           | 1.276882607 |
| 1.021681449 | 1.075379047                                                               | 0.587903478 | 0.825119046 | 1           | 1.032256947 |
| 0.716269521 | 0.771684102                                                               | 0.773007619 | 0.76663864  | 0.820459668 |             |
| YKL095W     | YKL095W::YJU2::Product of gene unknown 1 0.846499061                      |             |             |             |             |
| 1.45070435  | 1                                                                         | 1.334629659 | 1.483149025 | 1.154688748 | 1           |
| 1.158989273 | 1.364844521                                                               | 1.540528442 | 1           | 0.506803308 | 0.381513225 |
| 0.605320392 | 0.886143197                                                               | 1           | 1.232955001 | 2.260063417 | 1.477387999 |
| 0.889903806 | 1                                                                         | 1.118451025 | 1.351371793 | 0.961398709 | 0.875495483 |
| 1.394714895 | 1                                                                         | 1.541699211 | 0.96194511  | 0.928374328 | 1           |
| 0.987214086 | 0.678758485                                                               | 1.058944522 | 0.595231186 | 0.873767692 | 0.623444299 |
| YHL035C     | YHL035C::YHL035C::molecular_function unknown 1 1.177214391                |             |             |             |             |
| 0.998582083 | 1.372337609                                                               | 1.051659623 | 1           | 1.191699663 | 1.138641433 |
| 0.946536197 | 1.081458921                                                               | 1           | 1.97510812  | 1.859196972 | 1.269904947 |
| 1.378556713 | 0.800409034                                                               | 0.968184246 | 0.800884645 | 1           | 0.963319895 |
| 0.839414938 | 0.800909501                                                               | 0.868762762 | 1           | 2.255859846 | 2.823721416 |
| 2.45585427  | 0.967615594                                                               | 1.45517415  | 1           | 3.795618924 | 2.304415784 |
| 3.950482438 | 2.010870927                                                               | 0.705863355 | 1           | 3.497086783 | 2.482303476 |
| 1.568370015 | 0.595698402                                                               | 1.300921437 | 1.186470537 |             |             |
| YHL035C     | YHL035C::YHL035C::molecular_function unknown                              |             |             |             |             |
|             |                                                                           |             |             | 1           | 1.036249205 |
| 0.992055841 |                                                                           | 1.264066627 | 1           | 0.928629398 | 1.994523625 |
| 1           | 0.818656438                                                               | 1.034244922 | 0.879555126 | 0.860617985 |             |
| YKL097C     | YKL097C::YKL097C::molecular_function unknown 1                            |             |             |             |             |
| 1           |                                                                           |             | 1           |             |             |
|             | 0.534991309                                                               |             | 0.542770833 | 0.257650762 | 1           |
| 0.823975036 | 0.702538908                                                               | 0.800583634 | 1           | 1.194805812 |             |
| 0.879618129 | 1                                                                         |             | 1.07359549  | 0.826192665 | 1.14744585  |
| 0.933363304 | 0.960559531                                                               |             |             |             |             |
| YHL049C     | YHL049C::YHL049C::molecular_function unknown 1 0.926828028                |             |             |             |             |
| 0.619106048 | 1.016576858                                                               | 0.554191574 | 1           | 1.178936048 | 0.583841809 |
| 0.470164794 | 1                                                                         | 0.915919647 | 0.875630318 | 0.628038573 | 0.845329999 |



|             |                                                                                                             |             |             |             |             |             |             |
|-------------|-------------------------------------------------------------------------------------------------------------|-------------|-------------|-------------|-------------|-------------|-------------|
| 2.078288865 |                                                                                                             | 1.436334551 | 1.097488572 | 1           |             | 0.604564473 |             |
| 0.385107138 |                                                                                                             | 1           | 0.743890979 | 0.765498705 | 0.908719362 | 1.056343948 |             |
| 1.003500621 | 1                                                                                                           | 0.69433017  | 0.467358893 | 0.892269415 | 1.183463753 |             |             |
| 0.484719623 | 1                                                                                                           | 0.74380058  | 0.655358715 | 1.007919836 | 0.515712632 |             |             |
| 0.806795865 |                                                                                                             | 0.725892293 |             |             |             |             |             |
| YKL098W     | YKL098W::YKL098W::molecular_function                                                                        | unknown     |             | 1           |             | 1.10459343  |             |
| 0.925158242 | 1.061488992                                                                                                 | 0.895279864 | 1           |             | 1.051022142 | 1.07459458  |             |
| 1.07639339  | 1.130229503                                                                                                 | 1           |             | 0.964045788 | 0.962385791 | 1.086299121 |             |
| 1.256598638 | 1                                                                                                           |             |             | 0.90396416  | 0.746267373 |             | 1.309687875 |
| 0.530035814 |                                                                                                             | 0.731641158 | 1           |             | 1.206298539 | 1.227483878 | 1.234604904 |
| 1.701998253 | 1.404328827                                                                                                 | 1           |             | 0.93378465  | 0.665137695 | 0.670673145 |             |
| 0.895115427 | 0.50748701                                                                                                  | 1           |             | 0.686406539 | 0.566716923 | 0.79841083  |             |
| 0.641908692 | 0.683267161                                                                                                 | 0.578787476 |             |             |             |             |             |
| YHR001W     | YHR001W::OSH7::Oxysterol Binding Protein                                                                    |             | 1           |             |             | 1.175101458 |             |
| 1.04112191  | 1.352986549                                                                                                 | 0.965746098 | 1           |             | 1.83936952  | 1.140884508 |             |
| 1.06056439  | 1.210681295                                                                                                 | 1           |             | 0.832704644 | 1.153861369 | 1.13088405  | 1           |
| 1.168475874 | 0.945365728                                                                                                 | 1.15823442  | 0.979416901 | 1           |             | 1.559750527 |             |
| 0.919378204 | 1.514015861                                                                                                 | 1.642135655 | 1           |             | 0.910255832 | 1.014259461 |             |
| 1.294867268 | 0.96413519                                                                                                  | 1.071968996 | 1           |             | 0.994048762 | 0.916302099 |             |
| 1.293333162 | 1.098433067                                                                                                 | 0.880647879 | 1           |             | 1.035862242 | 0.843726602 |             |
| 1.17995078  | 0.775667158                                                                                                 | 1.210849681 | 0.935166396 |             |             |             |             |
| YKL100C     | YKL100C::YKL100C::molecular_function                                                                        | unknown     |             | 1           |             | 1.222084241 |             |
| 0.967778686 | 1.129131633                                                                                                 | 0.621306972 | 1           |             | 1.344361868 | 1.275430698 |             |
| 0.826578927 | 0.688561465                                                                                                 | 1           |             | 1.426038524 | 1.461502337 | 0.979161011 |             |
| 0.93462566  | 1                                                                                                           | 1.785987586 | 1.897361578 | 1.977971779 | 0.761942389 | 1           |             |
| 1.773618208 | 0.847029286                                                                                                 |             | 1.303170548 | 1           |             | 1.229368473 | 1.243704703 |
| 1.367355378 | 1.276268735                                                                                                 | 1.171484372 | 1           |             | 1.122795422 | 0.815514813 |             |
| 1.053960305 | 0.787419434                                                                                                 | 0.542243862 | 1           |             | 1.349927868 | 0.981390367 |             |
| 1.168589118 | 0.808077889                                                                                                 | 1.305479341 | 0.867743381 |             |             |             |             |
| YOR032C     | YOR032C::HMS1::High-copy mep2 suppressor                                                                    |             | 1           |             |             | 1.109423447 |             |
| 0.780636922 | 1.02267935                                                                                                  | 0.825047082 | 1           |             | 1.006260526 | 0.92141917  |             |
| 0.865793768 | 1.111584507                                                                                                 | 1           |             | 1.224437255 | 1.246746762 |             | 1.342154689 |
| 1.612199245 |                                                                                                             | 2.047850654 | 0.969941416 |             |             |             | 0.537924655 |
| 0.568571084 | 1                                                                                                           | 1.045876971 | 0.977376567 | 0.945196859 | 1.074874604 |             |             |
| 0.983589858 | 1                                                                                                           | 0.959709333 | 1.09069894  | 0.721846946 | 0.635390634 |             |             |
| 1.427348337 | 1                                                                                                           | 0.836196804 |             | 0.740629595 | 1.234978616 | 0.76760855  |             |
| 1.524461433 |                                                                                                             |             |             |             |             |             |             |
| YKL102C     | YKL102C::YKL102C::molecular_function                                                                        | unknown     |             | 1           |             |             |             |
|             | 1                                                                                                           | 1.572533641 |             | 1           |             | 1.691246412 |             |
|             | 1.3336849                                                                                                   |             | 0.164736733 |             |             |             |             |
| 0.264173563 | 1                                                                                                           | 1.149246911 | 1.053228932 | 1.329551179 | 1.039579554 |             |             |
| 1.046784839 | 1                                                                                                           | 0.883948919 | 1.110934313 | 0.992524462 | 1.20316251  |             | 1           |
| 0.957958183 | 1.141779691                                                                                                 |             | 0.683615319 | 1.307015222 |             |             |             |
| YHR003C     | YHR003C::YHR003C::molecular_function                                                                        | unknown     |             | 1           |             | 0.978656287 |             |
| 0.870261989 | 0.965823725                                                                                                 | 0.889667991 | 1           |             | 1.000576233 | 1.01501748  |             |
| 1.022673905 | 0.990739999                                                                                                 | 1           |             | 0.862438566 | 0.762706216 | 0.766543194 |             |
| 1.044373398 | 1                                                                                                           | 1.037045123 |             |             | 1.212727491 | 1           | 1.360848246 |
| 1.108976253 | 0.917888474                                                                                                 | 0.977403124 | 1           |             | 0.991268992 | 0.837862249 |             |
| 0.915138193 | 0.865888875                                                                                                 | 0.930986196 | 1           |             | 0.914833639 | 0.877317409 |             |
| 0.764216721 | 0.866892576                                                                                                 | 1.032642551 | 1           |             | 1.055478691 | 0.94676749  |             |
| 1.04495599  | 1.069136402                                                                                                 | 0.94707298  | 1.088400659 |             |             |             |             |
| YKL104C     | YKL104C::GFA1::catalyzes first step in hexosamine pathway required for biosynthesis of cell wall precursors |             | 1           |             |             | 1.430446824 | 1.058724158 |
| 1.606783698 | 0.977484628                                                                                                 | 1           | 1.632004498 | 1.698428648 | 1.036923161 |             |             |
| 1.014795137 | 1                                                                                                           | 1.464085825 | 1.311578477 | 0.684308969 | 1.147907434 | 1           |             |
| 1.550150182 |                                                                                                             | 0.549056135 |             |             |             |             | 1           |
| 0.939800674 | 1.020517032                                                                                                 | 1.123966955 | 1.018437773 | 0.959025443 | 1           |             |             |

1.314207593 0.757874623 0.927172751 0.751988029 0.661288195 1  
0.660012553 0.713908846 0.793435346 0.645202807 0.772939716 0.874748387  
YHR005C YHR005C::GPA1::Involved in the mating pheromone signal transduction  
pathway; component of pheromone response pathway common to both a and alpha  
cells. 1 0.869295046 0.944713472 0.968074413 0.905779731 1  
0.973999648 0.943820637 1.022832819 0.806849893 1 0.743664676  
0.864662208 0.627444642 0.854869826 1 1.073459638 0.829099541  
0.929134354 1.721282692 1 0.57456615 0.903615746 1.22544263 1  
0.749525536 0.782467452 0.671961943 0.728667954 0.869349112  
0.832486472 1.070982874 1 1.221873668  
0.035992819 1.493620022 1.09715689  
YOL021C YOL021C::DIS3::Possible component of RCC1-Ran pathway 1  
0.885510261 0.74331651 1.110601323 0.611930952 1 1.037093719  
1.047495834 0.719369051 0.742100625 1 0.804033688 0.595591995  
0.39358434 0.908776249 1 0.520838661 0.381804563 0.526901491  
0.485087671 1 0.591959432 0.968271645 0.506565346 0.809389285 1  
0.703183658 0.582745778 0.694061276 0.887155032 0.69800028 1  
0.81625174 0.58557081 0.509531806 0.674792461 0.573704432 1  
0.822409299 0.67535332 0.897382972 0.78309518 0.643102208 0.636578646  
YKL118W YKL118W::YKL118W::molecular\_function unknown 1 1.589144981  
1.405136783 1.407085809 1.834394789 1 1.351873292  
1.739841734 1 1.291452442 1.178458605 1.20870795 1.505406346 1  
0.322053457 0.276653933 0.598294869 1.141180515 1 1.405503182  
1.870510431 1 0.924553177 0.937447125 1.006873681 1.11968611  
1.325447323 1 0.84735072 1.305365845 1.210934199 1.134535421 1  
0.990408482 0.509616555 1.462831395  
YHR009C YHR009C::YHR009C::molecular\_function unknown 1 2.038206668  
1.770816862 2.384661804 1.879256528 1 2.155479613 2.36051331  
1.53096754 1 1.911759553 1.659876539 1.706948128 2.063814946  
1 0.959522564  
0.773833091 0.744135877 1.196914833 0.844388715 1 0.945419652  
0.482130911 0.497170952 0.547452654 0.632468083 1 0.817673958  
0.616206836 0.779357366 1.037745598 1.362647664 0.767046613  
YOL023W YOL023W::IFM1::mitochondrial initiation factor 2  
0.83850644 1.192342504 1.099341015 1.332337431  
0.96209431 0.918098325 1.00847243 1 0.655866153  
0.439076349 0.553451871 0.738764816 1 1.15640383 2.119684757  
1.252217257 0.73450567 1 0.801353741 0.864630757 0.728731478  
0.894797781 0.863967339 1 0.990520587 0.552454984  
1.129224382 1 1.14535898 0.897032862 0.986815266 1.170771594  
1.03331424 1.034111939  
YHR023W YHR023W::MYO1::myosin class II 1 1.194105164  
0.774880302 1 1.198197309 1.264290689 0.909179082 0.743624673 1  
1.063817952 1.017125035 0.644868429 1.006702671 1 0.951704292  
0.986461746 1 0.537383276 1 0.816474646  
0.741424787 0.672528201 1.045912224 0.887592291 1 0.70926069  
0.673661942 0.457138412 0.8106508 0.904987028 1 0.848323711  
1.102531675 1.415958409 1.069738291 0.814330326  
YOL025W YOL025W::LAG2::affects longevity 1 1.252247115 1.327940848  
1.389264404 1.199174864 1 1.416342211 1.72239381 1.447106606  
1.437030993 1 1.679168498 1.470507344 1.217730855 1.3671854 1  
0.939355422 1.230218327 1.418343536 1.176652308 1 0.70997711  
1.204077407 0.937440235 0.617416808 1 1.03402621 1.183990714  
0.979280935 1.056889958 0.853416429 1 0.900297632 0.894451259  
0.80346515 0.852291738 0.838968483 1 1.019353677 0.986628007  
0.990955567 0.993991153 1.147480435 0.84847964

YHR025W YHR025W::THR1::homoserine kinase 1 1.022949764 0.714116792  
0.418242998 0.199444164 1 0.881213231 0.865612755 0.417240639  
0.3277457 1 1.175948043 1.116247894 0.71741148 0.331341405 1  
1.075985488 1.976001986 1.981879297 0.403228692 1 0.614926787  
0.373550315 0.202016903 0.329022285 1 0.835493938 0.781565265  
0.560817614 0.594275091 0.803308982 1 1.012627939 1.180411838  
0.707353056 0.966417795 1.192980187 1 1.138782097 1.458837158  
1.188394725 1.539000736 1.261420491 1.150569945  
YOL027C YOL027C::YOL027C::molecular\_function unknown 1 1.220813496  
1.260653192 1.603193318 1.252091813 1 1.48305835 1.569457719  
1.196501296 1.22544213 1 1.133163812 1.116295477 0.874353517  
1.32669119 1 0.809819076 0.784418074 0.954858554 0.93535513 1  
0.61043166 0.590252939 0.476666589 0.528180658 1 0.869449331  
0.864133035 0.934997642 1.031490333 0.718538972 1 0.78495034  
0.584635949 0.48787411 0.860627995 1 0.928786768 0.803777361  
1.144158495 0.824380842 1.139410346 0.583165592  
YHR027C YHR027C::RPN1::Subunit of 26S Proteasome (PA700 subunit) 1  
1.391275614 1.117119675 1.576626358 0.983653285 1 1.601825141  
1.577560432 1.078637661 0.94663807 1 1.214274921 1.517894213  
0.899769604 1.126031783 1 1.187488706 1.280668502 1.165209516  
0.856719368 1 0.861722827 0.687246868 0.830584116 0.775384562  
0.84795689 0.977465895 0.892117874 0.795535397  
1.498748051  
YHR027C YHR027C::RPN1::Subunit of 26S Proteasome (PA700 subunit)  
1  
0.777641239 0.603682411 0.799459827 0.969227034 1.013756207 1  
0.989250921 0.751430823 0.519708126 0.818333562 0.592077969 1  
0.995222079 0.814908391 1.053755075 0.859449816 0.686927047 0.868618994  
YOL029C YOL029C::YOL029C::molecular\_function unknown 1 1.057065249  
1.035121883 1.012879169 1.420903216 1 0.978346539 0.950880341  
1.111586812 1.202731198 1 1.072272025 0.948340048 1.195683107  
0.955350227 1 0.99354194 1.079565317 0.878289757 1.009758399 1  
1.419886334 2.786065508 1.359799205 0.985420556 1 0.862832605  
0.869353801 0.629845921 0.706907664 0.714409441 1 0.741530446  
0.842301805 0.534728933 1.44143693 1 0.962332302 1.040335114  
1.133086524 1.298733316 1.218897333 1.117296244  
YOL031C YOL031C::YOL031C::molecular\_function unknown 1 0.890238754  
1.03941215 1.125992788 1.30525519 1 0.996115585 1.059655698  
1.248103149 1.138931587 1 0.946182017 0.980295434 0.920892692  
1.142917533 1 0.476340034 0.539460643 0.470330269 1.091426199  
0.60071014 0.887865919 0.871098676 1.005598963 1 1.10408263  
1.138053692 0.999983887 0.971872718 1.076266119 1 1.072088693  
1.54650111 1.325897029 1.283785982 1.353355185 1 0.910622645  
1.302007736 1.217265311 1.307274351 1.522554292 1.068261305  
YOL045W YOL045W::PSK2::PAS domain-containing Serine/threonine Kinase 1  
0.731353511 0.687202866 0.892334301 0.67475837 1 0.845953163  
0.871366161 0.758353878 0.653061654 1 0.864389183 0.693298737  
0.536959265 0.848095963 1 0.588669758 0.555610011 0.756179099  
0.61113172 1 1.059218274 0.830313684 0.402139502 0.725623948 1  
1.054508361 1.059775311 1.027531837 1.038690128 1.04859726 1  
1.042311693 1.149844591 0.778392574 1.059910528 1 0.990369681  
0.990141876 1.039832661 1.011217786 0.938563186  
YOL045W YOL045W::PSK2::PAS domain-containing Serine/threonine Kinase 1  
1.450360655 1.368993219 1.093540106 1 1.108537637 1.104982723  
1.213146304 1.270139087 1 0.893537413 0.928033578 1.154755282  
1.123253011 1 1.103511824 1.120482831 1.118002905 1

|                                                                            |                                                                   |             |             |             |             |
|----------------------------------------------------------------------------|-------------------------------------------------------------------|-------------|-------------|-------------|-------------|
| 0.853935103                                                                | 1.076553843                                                       |             | 1           | 0.910358719 | 0.971664288 |
| 1.002344991                                                                | 1.059671156                                                       | 0.984086593 | 1           | 0.826792804 | 0.620164721 |
| 0.724902503                                                                | 0.891148795                                                       | 0.668591835 | 1           | 0.734083169 | 0.834193553 |
| 1.007572466                                                                | 0.804030109                                                       | 0.878441051 | 0.792439695 |             |             |
| YOL047C                                                                    | YOL047C::YOL047C::molecular_function                              | unknown     | 1           | 1.665225724 |             |
| 2.084249292                                                                | 2.429702721                                                       | 1           | 2.787968857 | 1           |             |
| 1.887514836                                                                | 3.345572763                                                       | 6.519150652 | 3.422760797 | 1           | 1.113910908 |
| 1.494420977                                                                | 1.462635404                                                       | 1.062297582 |             |             | 0.535957063 |
| 0.617422211                                                                | 0.744604423                                                       | 0.914290383 | 0.886063471 | 1           |             |
| 1.405383889                                                                | 1.759190038                                                       | 2.563571632 |             |             | 0.7133115   |
| 0.908183853                                                                | 0.373040578                                                       | 0.882629006 |             |             |             |
| YOL049W                                                                    | YOL049W::GSH2::Glutathione Synthetase                             |             | 1           | 0.833180335 |             |
| 0.950108235                                                                | 1.029085274                                                       | 0.975485373 | 1           | 1.002425019 | 0.94721702  |
| 0.967394222                                                                | 0.986571184                                                       | 1           | 1.027693265 | 1.219711213 | 1.069137945 |
| 0.999449478                                                                | 1                                                                 | 1.000085811 | 0.940636911 | 1.170585798 | 1           |
| 1.4145279                                                                  | 1.674267229                                                       | 1.536989826 | 1.370640819 | 1           | 1.29468197  |
| 1.176740065                                                                | 1.848530147                                                       | 1.033438675 | 1.196599004 | 1           | 1.770841142 |
| 2.119618028                                                                | 2.298565144                                                       | 2.125086426 | 1.566926156 | 1           | 1.272858452 |
| 1.250762319                                                                | 1.147762694                                                       | 1.310943125 | 1.005859975 | 1.34320725  |             |
| YKL120W                                                                    | YKL120W::OAC1::oxaloacetate carrier                               |             | 1           | 1.106362098 | 0.924646005 |
| 0.998647842                                                                | 1.18169044                                                        | 1           | 0.848029164 | 0.796687736 | 1.169652371 |
| 0.978894619                                                                | 0.709939089                                                       | 0.573074875 | 1.091628677 | 1           | 0.286416791 |
| 0.202232403                                                                | 0.318072742                                                       | 1.146143553 | 1           | 0.945430746 | 1.339846298 |
| 1.760549625                                                                | 1                                                                 | 1.075366764 | 1.189793036 | 2.782543168 | 0.792771452 |
| 1.085426178                                                                | 1                                                                 | 0.991256938 | 0.975969577 | 0.662864224 | 0.632957423 |
| 1.07448863                                                                 | 1                                                                 | 0.708424711 | 0.759581109 | 0.712757729 | 1.285384887 |
| 0.766797592                                                                | 2.827389976                                                       |             |             |             |             |
| YKL122C                                                                    | YKL122C::SRP21::part of the signal recognition particle (SRP)     |             |             |             |             |
| ribonucleoprotein (RNP) complex that functions in protein targeting to the |                                                                   |             |             |             |             |
| endoplasmic reticulum (ER) membrane                                        | 1                                                                 | 0.693811668 | 1.049017705 | 0.731924192 |             |
| 1.141805844                                                                | 1                                                                 | 0.690397422 | 0.684396497 | 1.224970824 | 0.940651583 |
| 0.808175402                                                                | 0.898175126                                                       | 1.244651674 | 0.967857192 | 1           | 0.650918894 |
| 0.438468735                                                                | 0.474985009                                                       | 0.748788811 | 1           | 1.516783926 | 1.36170699  |
| 1.405281271                                                                | 1.196358215                                                       | 1           | 0.921436667 | 0.957742359 | 0.560642649 |
| 0.560116973                                                                | 1.161781612                                                       | 1           | 1.177418437 | 1.444078539 | 2.111331787 |
| 2.4246897                                                                  | 1                                                                 | 0.894412975 | 1.141367018 | 1.31368621  | 1.743209058 |
| 2.056286988                                                                |                                                                   |             |             |             |             |
| YKL124W                                                                    | YKL124W::SSH4::Suppressor of SHR3; confers leflunomide resistance |             |             |             |             |
| when overexpressed                                                         |                                                                   | 0.967791598 | 0.931553145 | 1.013040296 | 0.840934398 |
| 0.894728019                                                                | 0.922640851                                                       | 0.976510245 | 0.821474223 |             | 0.944009847 |
| 0.941368115                                                                | 0.835524659                                                       | 1.069055995 |             |             | 1.312605351 |
| 1.113992193                                                                |                                                                   |             | 1           | 0.971849035 | 1.174723619 |
| 1.075437913                                                                | 0.993523147                                                       | 0.980526614 | 1           | 1.139145487 | 1.059191358 |
| 1.505803401                                                                | 1.108394007                                                       | 1.794383294 | 1           | 1.040462412 | 1.210793343 |
| 2.16475463                                                                 | 1.115545019                                                       |             |             |             |             |
| YHR029C                                                                    | YHR029C::YHR029C::molecular_function                              | unknown     | 1           | 1.085911204 |             |
| 1.280976493                                                                | 0.975191856                                                       | 1.161817886 | 1           | 0.898040129 | 0.940048886 |
| 1.324059581                                                                | 1.12303413                                                        | 1           | 2.417450737 | 4.819356536 | 3.93569385  |
| 1.528907007                                                                | 1                                                                 | 3.797612487 | 3.858185305 | 4.436002004 | 2.661861413 |
| 3.330868033                                                                | 5.596624426                                                       | 6.326460885 | 2.049460436 | 1           | 1.578802504 |
| 1.750743868                                                                | 1.185439145                                                       | 1.120723164 | 0.970581141 | 1           | 1.733551098 |
| 2.534397661                                                                | 1.287516088                                                       | 1.589403963 | 1.722517207 | 1           | 1.541573654 |
| 2.036073994                                                                | 1.17757229                                                        | 1.619088898 | 0.849509779 | 1.369475945 |             |
| YKL126W                                                                    | "YKL126W::YPK1::76.5 kDa Serine/threonine protein kinase with     |             |             |             |             |
| similarity to protein kinase C, is 90% identical to Ypk2p"                 |                                                                   |             | 1           | 1.112548444 |             |
| 1.007247664                                                                | 1.18915905                                                        | 0.979211935 | 1           | 1.276059831 | 1.279578605 |
| 0.975794162                                                                | 0.881435283                                                       | 1           | 1.15124697  | 1.379918408 | 0.972186936 |

1.140489719 1 1.586025434 1.208505727 1.421801875 1.125009699 1  
1.788222769 2.100176301 1.801398294 1.297997729 1 0.993202166  
1.064056266 1.316523315 1.089212448 1.040359911 1 0.972367536  
1.101649993 1.082655316 0.743127865 0.64644588 1 1.214605507  
1.25360335 1.078065803 0.921014839 0.889603869 0.835345293  
YHR031C YHR031C::RRM3::involved in rDNA replication and Ty1 transposition 1  
0.731694417 0.7065644 1.045894533 0.783267379 1 0.889439395  
0.94032567 0.851941933 0.9624985 1 0.644540957 0.550846919  
0.420733269 1.03464608 1 0.512141227 0.465602447 0.578714156 1  
0.549434078 0.953303334 0.351999709 0.481937423 1 0.967112405  
1.162103985 1.004746466 1.120373917 0.942971678 1 0.663613329  
1.114110599 1.060336348 1.229065974 1.645960806 1 1.501660388  
1.571469588 1.34476557 1.795544686 0.851106531  
YKL128C "YKL128C::PMU1::Phospho MUTase homolog. Small region homologous to  
active site of phospho-mutases, these move phosphates via a phospho-histidine  
intermediate. Homologs include: Sc GPM1, bact. Pgm, Hs Bpgm & rat fructose-2,6-  
bisphosphatase" 1 0.97087765 0.933133644 0.858645291 0.8908358 1  
0.909799959 0.765452987 1.055666482 0.984632539 1 1.285733569  
1.266268053 0.863682545 0.929148616 1 1.018618394 0.709678766  
0.783021569 0.975444859 1 1.511706536 1.015169036 1.193951489  
1.026426613 1 1.326358877 1.419150666 1.900579864 1.322770324  
1.225342976 1 1.171338022 1.43499696 1.218764543 0.995563544  
0.783900057 1 1.299169776 1.287985337 1.149430547 1.017579522  
0.84257781 1.171584964  
YHR033W YHR033W::YHR033W::molecular\_function unknown 1 1.458834797  
1.407000061 1.562112547 1.446757702 1 1.447900579 1.537980682  
1.536263126 1.626972285 1 1.407432108 1.291722085 1.93240861  
1.555335056 1 1.365127382 1.617646794 0.89903925  
0.41211512 0.754797838 0.695765744 1 1.507220906 1.469769822  
1.662206361 1.332342943 1.420635983 1 1.084589211  
1.300724351 1 1.122148024 1.18762544 0.770109639 1.139804444  
0.773219517 2.138273731  
YHR033W YHR033W::YHR033W::molecular\_function unknown  
1 1.314920601  
1.661149148 1.706289581 1.143032272 1.224813212 1 1.28081434  
1.123974043 0.592024635 1 1.449987419 1.533604054 0.681471209  
0.711156087 0.874990508 0.989455116  
YKL142W YKL142W::MRP8::mitochondrial ribosomal protein 1 1.439331561  
1.48772614 1 1.306587634 1.57194141 1  
1.197367583 1.301774367 1.426628363 1 1.363764203  
1.934806404 1 1.611779271 2.936174361 1.305538962 1  
0.934381456 1 0.629358065  
1 0.816319126 0.97178322 0.627822415  
YKL144C YKL144C::RPC25::Subunit of RNA polymerase III 1 0.868868787  
0.864835889 0.792846117 1.019103191 1 0.715927778 0.651369754  
1.312595553 1.114321269 1 0.589466027 0.587543288 0.92930555  
1.040843066 1 0.445687625 0.342961426 0.500583258 0.887016432 1  
0.974653255 1.252954635 1.243848911 0.702235859 1 0.904042694  
0.846764668 0.892459911 0.8997877 0.93934788 1 0.903711228  
1.066444488 0.724687184 1.432632831 1 0.863024369 0.930279219  
0.962412436 1.34648336 0.760537207 1.179465531  
YHR046C YHR046C::INM1::<u>in</u>ositol <u>m</u>onophosphatase 1  
0.973779467 0.983088409 0.947031093 1.144514638 1 0.795377119  
0.770273534 1.14619123 1.20301212 1 0.706935276 0.651788168  
0.745473539 1.064810113 1 0.726380506 0.411322026 0.540110446  
1.085710055 1 1.094104426 1.298061431 1.053543945 0.947605563 1

|             |                                                                                                                                                                                                                |             |             |             |             |               |
|-------------|----------------------------------------------------------------------------------------------------------------------------------------------------------------------------------------------------------------|-------------|-------------|-------------|-------------|---------------|
| 1.405048819 | 1.318082396                                                                                                                                                                                                    | 0.945239976 | 0.99986664  | 1.155659977 | 1           |               |
| 0.688717739 | 1.032434215                                                                                                                                                                                                    | 0.846348805 |             |             | 1           | 1.153384609   |
| 0.897570862 | 1.763158253                                                                                                                                                                                                    | 0.820459668 |             |             |             |               |
| YKL146W     | YKL146W::YKL146W::molecular_function unknown                                                                                                                                                                   |             |             | 1           |             | 1.253527636   |
| 1.023069127 | 1.293390833                                                                                                                                                                                                    | 0.755320697 | 1           | 1.39330843  |             | 1.379878      |
| 1.001870181 | 0.91485007                                                                                                                                                                                                     | 1           | 1.21026262  | 1.243548108 |             | 0.979161011   |
| 1.173033527 | 1                                                                                                                                                                                                              | 1.109827853 | 1.200697474 | 1.014524494 |             | 1             |
| 1.039816767 | 0.634070471                                                                                                                                                                                                    | 0.589706464 | 0.495855078 | 1           |             | 1.347575468   |
| 1.214251775 | 1.287229749                                                                                                                                                                                                    | 1.632441111 | 1.273525712 | 1           |             | 1.079776709   |
| 0.969450606 | 0.783405205                                                                                                                                                                                                    | 1.144916131 | 0.705391976 | 1           |             | 0.704984995   |
| 1.02407429  | 0.54208554                                                                                                                                                                                                     | 0.611695309 | 0.72238979  |             |             |               |
| YHR048W     | YHR048W::YHR048W::not yet annotated                                                                                                                                                                            |             |             | 1           | 0.907949621 | 0.783900993   |
| 0.90634215  | 1                                                                                                                                                                                                              | 0.856766308 | 0.791397281 | 0.888604468 |             | 0.790108477 1 |
| 2.630254023 | 0.949219879                                                                                                                                                                                                    | 0.723564222 | 0.916355369 | 1           |             | 0.963420668   |
| 0.976447952 | 1.233927183                                                                                                                                                                                                    | 0.955560391 | 1           | 1.573936343 |             | 2.05906098    |
| 1.126115794 | 1.427685526                                                                                                                                                                                                    | 1           | 0.929047424 | 0.919647074 |             | 0.614922895   |
| 0.863852689 | 0.972265649                                                                                                                                                                                                    | 1           | 1.085837568 | 1.458458879 |             | 0.837478304   |
| 0.682664744 | 1.746391368                                                                                                                                                                                                    | 1           | 1.787869066 | 1.49474824  |             | 0.861356043   |
| 2.193922478 | 1.298155812                                                                                                                                                                                                    | 1.303804103 |             |             |             |               |
| YOL051W     | YOL051W::GAL11::Regulates transcription of a diverse array of genes. Required for mating and sporulation.                                                                                                      |             |             | 1           | 1.136361525 | 1.1955197     |
| 1.303647855 | 1.136693875                                                                                                                                                                                                    | 1           | 1.408690824 | 1.241161333 |             | 1.092776594   |
| 1.058964635 | 1                                                                                                                                                                                                              | 1.06938923  | 1.136969083 | 0.949786225 |             | 1.082810923 1 |
| 0.575067589 | 0.356488913                                                                                                                                                                                                    | 0.451750855 | 0.556712782 | 1           |             | 0.760362671   |
| 1.297887174 | 1.23467198                                                                                                                                                                                                     | 1           | 0.837105182 | 0.921264127 |             | 0.896234452   |
| 0.823268642 | 0.766891169                                                                                                                                                                                                    | 1           | 1.344262981 | 1.022595566 |             | 1.226020163   |
| 1.030911536 | 0.810916447                                                                                                                                                                                                    | 1           | 1.25903201  | 1.069729208 |             | 0.993489951   |
| 1.067514216 | 0.823129811                                                                                                                                                                                                    | 0.729394796 |             |             |             |               |
| YKL148C     | "YKL148C::SDH1::Yeast succinate dehydrogenase (SDH) is a tetramer of non-equivalent subunits--Sdh1p, Sdh2p, Sdh3p, Sdh4p--that couples the oxidation of succinate to the transfer of electrons to ubiquinone." |             |             | 1           |             | 1.660027439   |
| 1.70540551  | 1.264346533                                                                                                                                                                                                    | 0.904027016 | 1           | 1.941219802 |             | 1.907582059   |
| 1.260045405 | 1.128010387                                                                                                                                                                                                    | 1           | 1.179754296 | 1.177616085 |             | 1.746565751   |
| 1.075771532 | 1                                                                                                                                                                                                              | 1.230975687 | 1.045786512 | 1           |             | 1.046830751   |
| 0.772090989 | 0.84430895                                                                                                                                                                                                     | 0.768084403 | 1           | 0.832286285 |             | 0.765879167   |
| 0.716017965 | 1.12224139                                                                                                                                                                                                     | 1.114718173 | 1           | 0.287362255 |             | 0.279469998   |
| 0.232302901 | 0.286046619                                                                                                                                                                                                    | 0.643170318 | 1           | 0.703954259 |             | 0.479794619   |
| 0.684831423 | 0.937762451                                                                                                                                                                                                    | 1.533283278 | 0.882629006 |             |             |               |
| YHR050W     | YHR050W::SMF2::SMF2 was isolated as a high copy suppressor of a temperature sensitive mutation in the PEP ( mitochondrial matrix protease) gene and may influence PEP-dependent protein import                 |             |             | 1           | 0.977261613 | 0.651145977   |
| 0.872450779 | 0.438366606                                                                                                                                                                                                    | 1           | 0.887319521 | 0.839680849 |             | 0.856197507 1 |
| 1.12447589  | 0.738426438                                                                                                                                                                                                    | 0.692149637 | 0.838093702 | 1           |             | 1.255598088   |
| 1.680728539 | 0.963049165                                                                                                                                                                                                    | 0.721288035 | 1           | 1.351161117 |             | 1.018895563   |
| 0.96961093  | 1.333316887                                                                                                                                                                                                    | 1           | 0.990086202 | 1.037243698 |             | 0.891533146   |
| 1.135930931 | 1.105811944                                                                                                                                                                                                    | 1           | 0.715224764 | 1.306346613 |             | 0.762284198   |
| 1.157939482 | 1.995464258                                                                                                                                                                                                    | 1           | 0.700711268 | 0.915612821 |             | 0.883872836   |
| 1.644918388 | 0.850554048                                                                                                                                                                                                    | 1.14881872  |             |             |             |               |
| YKL150W     | YKL150W::MCR1::NADH-cytochrome b5 reductase                                                                                                                                                                    |             |             | 1           |             | 1.131903327   |
| 1.506271251 | 1.550552718                                                                                                                                                                                                    | 1.893117687 | 1           | 1.263919442 |             | 1.597306232   |
| 1.887837775 | 2.014195046                                                                                                                                                                                                    | 1           | 1.114580687 | 1.772557557 |             | 4.033981456   |
| 1.760957524 | 1                                                                                                                                                                                                              | 2.668287865 | 2.43431815  | 4.093791005 |             | 3.592125247 1 |
| 2.493685147 | 2.413227394                                                                                                                                                                                                    | 4.807541219 | 3.891802837 | 1           |             | 1.221142529   |
| 1.368915306 | 1.437178195                                                                                                                                                                                                    | 1.088131448 | 1.206638405 | 1           |             | 0.913592604   |
| 1.281898642 | 1.258397688                                                                                                                                                                                                    | 1.365847464 | 1.466853269 | 1           |             | 1.119673748   |
| 1.066099912 | 1.263756168                                                                                                                                                                                                    | 1.89262869  | 2.225673521 | 1.906233488 |             |               |

YHR052W YHR052W::CIC1::Core interacting component 1 1 1.042257167  
0.799461 1.08010685 1 0.843464285 0.708777327  
1.242393321 1 0.578005408 0.476450014 1.06965241 1  
0.362399656 0.478550782 0.588031362 0.30035507  
0.66858742 1 0.580721477 0.634895659 0.485133083 0.44731579  
0.756061298 1 1.302373694 2.438411009 2.177233278 2.981725951  
3.710967077 1 1.31364876 2.432188283 1.594377279 1.881457632  
1.576026606 1.85894967  
YOL054W YOL054W::PSH1::<b><u>P</u></b>ob3/<b><u>S</u></b>pt16  
<b><u>H</u></b>istone associated 1 0.9084524 1.06140078 1.152951739  
1.160368816 1 0.940553972 1.31070536 1.230928105 1.416517388 1  
0.858143237 0.835452716 0.951084723 1.511254485 1 0.444437389  
0.974510854 1 1.046397587 0.660413674 0.674553815 1  
0.824399911 0.709754102 0.985166275 1.019784504 1 0.720970795  
0.62702192 0.887105646 1 0.925358582 0.808489603  
0.945592849 0.86681467  
YHR054C YHR054C::YHR054C::molecular\_function unknown 1 0.898296582  
0.737862643 0.81492369 0.980865952 1 0.838368953 0.758944519  
0.756210325 0.817502565 1 0.82231315 0.72456628 0.661735958  
0.789068247 1 1.31209425 1.251467447 1.679699661 1  
1.376125086 1.144816643 1.48924739 1.687794227 1 1.082454978  
1.32146761 1.021518628 0.991424225 1.02737793 1 1.123966748  
1.527323056 1.15827394 0.89559469 1 2.038937094 2.551861223  
1.365383299 1.969104928 2.572697117 1.346709701  
YOL068C YOL068C::HST1::Homolog of SIR2 1 1.213867162 1.167456748  
1.139803428 1.019428067 1 1.197796939 1.175512464 1.401177878  
1.205744696 1 1.127265307 1.072091642 1.102062543 1.029632072 1  
0.879619167 0.801054047 0.76574988 0.840521867 1 0.997271312  
1.271203496 1.11844094 1.419930818 1 0.941036071 0.87668824  
0.849350996 0.897778194 1.071947159 1 0.839205816 1.013009576  
0.697989336 0.773994275 1.071552203 1 0.993195826 0.955601997  
1.061385951 1.247516146 1.339622507 1.068261305  
YHR056C YHR056C::RSC30::RSC complex component 1 0.796119558  
0.673684211 0.813893231 0.657172203 1 0.831089678 0.832783406  
0.661274533 0.660852758 1 0.961198129 0.737862923 0.613023728  
0.748504758 1 0.779090324 0.371589842 0.649936991 0.95541463 1  
1.209086039 1.400469803 1.59753362 1.0737337 0.635682356  
0.586295459 1.128534126 0.754313787 0.965483794 1 0.851974931  
0.643676243 0.777666222 1.058188004 0.541495908 1 0.675286648  
0.963525721 1.069074182 0.74829472 1.104161897  
YOL070C YOL070C::YOL070C::molecular\_function unknown 1 0.761744707  
0.970812002 0.948103286 0.849686164 1 0.94619576 1.065250727  
1.064415691 0.982965167 1 0.83142909 0.930544606 0.921750898  
0.977960706 1 0.717993125 0.653974586 0.673074148 0.980001082 1  
0.958893466 1.066824592 1.066117799 0.793981323 1 0.926413936  
0.964479163 0.976259333 0.991576492 0.925438396 1 0.805765227  
0.792602782 0.659111667 0.943283551 1.066036898 1 1.101485066  
1.119599655 1.218220288 1.063213566 1.256140031 0.865992156  
YHR070W YHR070W::TRM5::tRNA modification enzyme 1 0.621141875  
0.479254161 0.613219627 0.342707822 1 0.641276637 0.590014949  
0.593162627 1 0.6308215 0.433783281 0.251211496 0.66706057 1  
0.330533858 0.087562356 0.402909621 0.443746899 1 0.583810635  
0.983187587 1 1.206854846 1.294975142 1.476019857 1.396523675  
1.289732265 1 0.972710891 1.302804261 1.128683307 0.865894903  
1.413734419 1 1.469908026 1.980883361 1.327018762 1.748871376  
1.324847365 1.761755561

YOL072W YOL072W::THP1 1 1.19724718 1.391097328 1.118334885  
0.980268998 1 1.296525741 1.425719226 1.168574866 1.193284509 1  
1.049342519 1.154736647 1.296067935 1.083537012 1 0.904626889  
1.431945863 1.180541819 0.730903641 1 0.6484227 0.44232862  
0.315197805 0.427461272 1 1.033656318 1.186342777 1.170015756  
1.51466414 1.24236901 1 0.941678144 0.51185359 0.514532537  
1.061372757 0.58667709 1 0.712245676 0.479812797 0.813855815  
0.431494697 0.932344133 0.490349442  
YOL076W YOL076W::MDM20::Mitochondrial distribution and morphology 1  
1.042500478 0.911011519 1.104491211 1.003217302 1 1.027450184  
0.927835172 1.068960272 0.841653947 1 0.852995794 0.840986917  
0.510619389 1.205219213 1 0.517480372 0.477181951 0.515378473 1  
0.616504902 0.761715473 0.40199404 0.593627064 1 0.731846852  
0.891714381 0.853560457 0.91242121 1.034186035 1 0.87091942  
0.765046297 0.76266778 0.846084545 0.705350414 1 0.818353438  
0.990768154 1.034795237 0.855772423 0.909052166 1.011345695  
YOL078W YOL078W::AVO1::Adheres voraciously (to TOR2)  
0.634371914 0.854793078  
1.23517431 1 1.145659005 1.924464059 1.22277588 1  
0.725533417 0.941759486 1 0.944251474 0.724065606  
0.722007941 1.103827865 0.800615266 1 0.66984765  
0.721190137 0.97777697 1 1.017633245 0.943505746 1.092955942  
0.797280731 0.889008637 0.98245011  
YOL092W YOL092W::YOL092W::molecular\_function unknown 1 1.370000788  
0.89185369 0.796232749 0.863026912 1 0.860087936 0.737974346  
0.915168438 0.977753823 1 1.202150562 0.634608191 0.53508803  
0.852151738 1 0.682666178 0.28456078 0.415207748 0.641320318 1  
0.590966601 0.295740837 0.29110273 0.529311775 1 0.906795841  
0.491588728 0.581720751 1.189218498 0.714431884 1 0.555209243  
0.325783783 0.281986309 0.402205547 0.554626126 1 0.619514192  
0.377796148 0.601555495 0.666351037 0.501998522 0.83184279  
YKL152C YKL152C::GPM1::converts 3-phosphoglycerate to 2-phosphoglycerate in  
glycolysis 1 1.327587028 1.393778137 0.966148323 1.27736799 1  
1.061219102 1.192492613 1.397264259 1.331303332 1 1.03723848  
1.099617808 1.783731635 1.040929902 1 0.933267454 0.829699867  
1.14356558 1.46856633 1 0.865840956 1.155816633 1.606042606  
1.365215846 1 1.32858031 0.917127095 1.694222621 1.232155009  
1.412300264 1 1.839378996 1.628969063 2.088011987 1.387661668  
1.287674399 1 1.095015988 0.987849567 0.956905388 0.831610212  
0.666575911 1.077017537  
YKL166C YKL166C::TPK3::Involved in nutrient control of cell growth and  
division 1 1.38065102 1.23858611 1.443908367 1 1.259302078  
1.197972793 1.479620642 1.556351953 1 1.209677476 1.249215674  
1.342542542 1.243213986 1 1.186904696 1  
0.486304983 1 0.862698755 0.8489498  
0.936841575 1.022076913 1 0.889429927 1.470054189 1.012306463  
1.141732501 1 0.835310333 0.942753542 1.070536069 1.325821051  
0.896613394 1.521834543  
YKL168C YKL168C::KKQ8::Serine/threonine protein kinase of unknown function  
1 0.778553678 0.99146352 0.948456352 0.693965805 1 0.968660203  
1.061145881 0.833237146 0.653405516 1 1.136755914 1.11740288  
0.86556227 0.910427596 1 1.599678569 0.980412115 1  
1.793332974 1.91995299 2.03180975 1.329681916 1 1.201669622  
1.144261243 1.344494562 1.0725337 1.239371835 1 1.441864831  
1.061660771 1.152527931 1.132741604 0.643841866 1 1.157030015  
1.028580211 0.972167535 0.798956899 0.841380187 0.991206341



YHR072W YHR072W::ERG7::carries out complex cyclization step of squalene to lanosterol in sterol biosynthesis pathway 1 0.715303062 0.504163209  
0.755113901 0.416108692 1 0.749070554 0.713005735 0.579316877  
0.613413592 1 0.616703561 0.485005753 0.324489394 0.689752952 1  
0.406750146 0.267924683 0.339986456 0.459385287 1 0.561253842  
0.369216889 0.458112711 0.935920788 1 0.836784272 0.789355685  
0.858234929 0.962021856 1.00115396 1 0.84138425 0.823018742  
0.814418478 0.889381468 0.811602182 1 0.683638445 0.942727115  
1.0434642 0.667752997 0.753803162 0.849355305  
YKL170W YKL170W::MRPL38::mitochondrial ribosomal protein L14 1  
0.886306325 1.251392293 0.877805982 1.338896761 1 0.885124816  
0.886997587 1.155259474 1 0.909875308 1.013569815 1.607401285  
1.005294193 0.79297003 0.509327646 0.651999043 1.016345992 1  
1.717774712 2.729009099 3.297273367 1.637210158 1 1.207360078  
1.150239561 0.848546069 0.972857887 1.124339325 1 1.203774996  
1.692289622 1.141746021 0.965802218 1.803236408 1 1.389797208  
1.438411388 0.950276008 1.937372754 1.827133489  
YHR074W YHR074W::QNS1::Glutamine-dependent NAD Synthetase 1  
0.841732511 0.639410462 0.764387052 0.474833759 1 0.940975611  
0.936829586 0.616159556 0.571762698 1 1.031749887 0.907434621  
0.717049745 0.645479367 1 1.445631562 1.122709475 1.52587386  
0.896477842 1 0.841105208 0.560060778 0.732650844 0.825009359 1  
0.918147241 1.033473586 0.69946201 0.78465779 1.061579658 1  
0.90691572 1.159484974 0.994678412 0.820464304 1.299213187 1  
1.035927952 1.134883091 1.17435285 0.632318916 1.191085561 1.203983  
YKL172W YKL172W::EBP2::EBNA1-binding protein homolog 1 0.482360709  
0.603109329 0.669223738 0.790702315 1 0.603130682 0.539860545  
0.834669778 1.011234365 1 0.430764481 0.352976811 0.334158107  
0.853455155 1 0.252238892 0.221302704 0.484424934 1  
0.429263117 0.387058181 0.340180808 0.672776101 1 0.60051863  
0.596663279 0.536583941 0.539418546 0.953284262 1 0.93884947  
0.947545971 0.578727205 1.580774656 1.480429897 1 0.615995621  
0.649344172 0.760765516 0.910020988 0.6361649 0.732897299  
YKL174C YKL174C::YKL174C::molecular\_function unknown 1.116777315  
0.831337162 0.931415623 1.208047714 0.905624575 0.854541193  
1.014934644 1.131230723 0.898195846 0.744632764 0.747882223  
1.042623341 1 0.930333194 0.62709312 0.683738407 0.719231414 1  
1.142105855 1.724426215 0.812927264 0.78117274 1 0.995240534  
0.973432862 0.883107168 1.170924321 0.960580278 1 0.707231685  
0.977377481 0.692184064 0.756348938 0.758520289 1 1.068739838  
1.090158705 0.809524203 1.060814323 0.672944821 0.895763354  
YHR076W YHR076W::PTC7 1 0.759979241 0.928693014 0.887760388  
0.972233408 1 0.817891241 0.78831063 1.143505829 0.975953057 1  
0.860957709 0.910001421 0.900534605 1.051298282 1 1.201468597  
0.998311373 1.110269823 1 1.386162767 1.297724965 1.724473573  
1.080521895 1 0.723368961 0.511990356 0.68391424 0.960165081  
0.858392055 1 0.640535359 0.577619356 0.40851214 0.811531311  
0.720611172 1 0.513692779 0.559577507 0.869091635 0.788023276  
0.411395538 0.663723006  
YKL176C YKL176C::LST4::involved in regulated secretion/recycling of nitrogen regulated permeases 1 0.879245666 0.768088379 0.955374576 0.813829122 1  
0.968512399 0.845999086 0.943962922 0.940006323 1 0.969412338  
0.761413879 0.616437333 1.007810985 1 0.936592782 0.679658862  
0.796973876 0.633969245 1 0.955150857 0.945900548 0.665248601  
0.828567107 1 1.070140164 1.018954852 1.210153541 1.36688053  
0.954757388 1 0.927219693 0.857456988 0.860461332 0.892308026

0.67893982 1 0.828968978 0.871647276 0.927155085 0.573193171  
1.04024128

YHR078W YHR078W::YHR078W::molecular\_function unknown 1 0.840722083  
0.553343184 0.897314247 0.640010005 1 0.82068154 0.845666426  
0.603443249 0.724897475 1 0.954712733 0.764162604 0.541311329  
0.763451134 1 0.961213179 1.183462603 0.702312944 1  
1.091379715 0.91163231 0.891620844 0.911733892 1.462517177  
0.670932033 0.705214653 1 1.593466178 1.323094268 1.739074955  
0.848479977 0.652805838 1 2.569934385 2.018680021 1.272202984  
0.371109913 1.579879922 0.965813311

YKL190W YKL190W::CNB1::Type 2B protein phosphatase; regulatory B subunit of  
calcineurin 1 0.932189065 1.261508582 0.995470332 1.564800988 1  
0.956597212 1.079163483 1.55672553 1.479718041 1 0.910020839  
1.22224585 1.605770862 1.248299761 1 1.724518217 1.128076188  
1.384621288 1.66533448 1 1.86074486 2.209937114 1.960003875  
1.71649907 1 1.064278747 1.461989333 1.154785934 0.964224773  
1.085511765 1 0.946876017 1.826277115 1.334284688 1.290496378  
1.492325089 1 1.114820937 1.631595894 1.203320845 1.542595782  
1.380718741 1.363346604

YHR079C YHR079C::IRE1::Involved in myo-inositol biosynthesis; implicated as  
the sensor of unfolded proteins in the ER that initiates transmittance of the  
unfolded protein signal from the ER to the nucleus 1 1.137502592  
1 1.037864633 1.086821992 1 1.007891568  
0.698404053 0.901324537 1.059411297 1 1.361588505 1  
1.115552816 0.659657682 1 0.848171093 0.828784043  
1.044767676 1.163063767 1.222602234 1 0.903398592 0.573957239  
0.56136863 1.028738003 0.669958022 1 1.02430755 0.782938718  
1.025888384 0.953736025 1.03963746 1.767884903

YKL192C YKL192C::ACP1::mitochondrial acyl carrier protein 1  
1.178004023 1.494018151 0.903352193 1.350425164 1 1.132593986  
1.153874915 1.401863558 1.400796007 1 1.269559075 2.218457289  
0.977027401 1 1.64020697 1.23535837 1.464655519 1.469048636 1  
1.379079603 2.141350404 1.686090594 1.026387476 1 1.458428732  
1.385361419 1.388247619 1.282225001 0.858968283 1 1.060604565  
1.635044764 1.061007486 0.740800106 1.029149606 1 0.93217447  
1.130235362 0.952910315 1.020823808 1.09570526 1.230251695

YHR093W YHR093W::AHT1::the AHT1 DNA sequence is upstream of HXT4 and  
contains an HXT4 regulatory element which is a multicopy suppressor of glucose  
transport defects; probable non-functional ORF 1.244831203 0.856391107  
0.784154168 0.977057473 1.025888805 0.988435069  
0.812595998 1.232547096  
1 0.95868962 0.799645337 0.899947  
1.021400723 1 0.922580757 0.909914448 0.891294302 1.034323548  
0.98713489 1 0.977560238 0.892890621 1.074928864 0.844651765  
0.90364392

YKL194C YKL194C::MST1::mitochondrial threonine-tRNA synthetase 1  
0.829883005 0.959449056 1.019853078 0.947597062 1 0.925790697  
1.189920377 1.027714529 1.175492716 1 0.905333054 0.949238469  
1.157871263 1.003200278 1 1.299668591 1.865066214 0.969276682  
0.672888537 0.897929827 0.581540147 0.775126541 0.70042514  
0.846653188 0.962768087 0.826737429 1 0.894232883 1.019074821  
0.910163706 0.848776628 1 0.951052713 0.898576934 1.019229222  
1.054949996 1.161357814

YHR095W YHR095W::YHR095W::molecular\_function unknown 1 1.219996442  
1.282695238 1.00641713 1.161069631 1 0.91815792 0.831594623  
1.317005224 1 1.137620731 1.246576058 1.461477718 1.229249768 1  
1.822037792 2.319558739 2.180306474 1.376949647 1 1.349192822

|             |                                                                                                                                                   |             |             |             |             |
|-------------|---------------------------------------------------------------------------------------------------------------------------------------------------|-------------|-------------|-------------|-------------|
| 3.571133198 | 2.058740843                                                                                                                                       | 0.858849956 | 1           | 0.879129457 | 0.825412631 |
| 1.036507958 | 1.139454159                                                                                                                                       | 0.937964363 | 1           | 0.826183036 | 0.557913453 |
| 0.641141599 | 0.946910859                                                                                                                                       | 0.316480693 | 1           | 0.782749185 | 0.615608862 |
| 1.000594149 | 0.570616365                                                                                                                                       | 0.763128696 | 0.519245027 |             |             |
| YHR097C     | YHR097C::YHR097C::molecular_function unknown                                                                                                      |             |             | 1           | 0.736295651 |
| 1.161767601 | 0.595273794                                                                                                                                       | 1           | 0.945747869 | 1.252283106 |             |
| 0.643343946 | 1                                                                                                                                                 | 1.002490747 | 1.428700752 | 2.068544436 | 0.772795943 |
| 1.955060426 | 7.384028998                                                                                                                                       | 2.909613825 | 2.825960829 | 1           | 2.524856181 |
| 3.007728228 | 4.903142436                                                                                                                                       | 2.454101236 | 1           | 0.919707639 | 0.927763358 |
| 0.837377277 | 0.750526578                                                                                                                                       | 0.889357255 | 1           | 1.121581426 | 1.104720964 |
| 1.14783047  | 1.048600922                                                                                                                                       | 1.478263903 | 1           | 1.021703422 | 1.397770402 |
| 1.06066804  | 1.410560069                                                                                                                                       | 0.92825299  | 1.326570347 |             |             |
| YHR099W     | YHR099W::TRA1::TRA1 is the homolog of the human protein TRRAP which we have isolated as an essential cofactor of c-Myc.                           |             |             | 1           | 1.185097925 |
| 0.946586214 | 1                                                                                                                                                 | 1.251005145 | 1.087689532 | 1.004710349 | 1           |
| 1.429415776 | 1.213760139                                                                                                                                       | 1.335219607 | 1.23046694  | 0.75667213  |             |
| 1.109694532 | 0.706870248                                                                                                                                       |             | 0.486621821 | 0.752561362 |             |
| 0.362015627 | 1                                                                                                                                                 | 1.017809499 | 0.970592768 | 0.996288326 | 0.850671328 |
| 0.96612968  | 1                                                                                                                                                 | 1.197690256 | 1.728875863 | 1.092136391 | 0.866097658 |
| 1.355942882 | 1                                                                                                                                                 | 1.228900955 | 1.658107336 | 1.298441232 | 1.767070161 |
| 1.050238502 | 1.239883592                                                                                                                                       |             |             |             |             |
| YHR101C     | YHR101C::BIG1::bad in glucose or big cells                                                                                                        |             |             | 1           | 0.915248516 |
| 0.88750492  | 0.841600782                                                                                                                                       | 1           | 0.785443669 | 0.883575315 | 0.831835315 |
| 0.834916554 | 1                                                                                                                                                 | 0.970860009 | 0.977474227 | 0.916557244 | 0.878495166 |
| 0.925767513 | 0.610061603                                                                                                                                       |             | 1.145571642 | 1           | 1.74188683  |
| 2.082856505 | 1.671810163                                                                                                                                       | 1           | 1.370104644 | 1.406737384 | 1.604759768 |
| 1.032851918 | 1.053522403                                                                                                                                       | 1           | 1.623651164 | 1.839915478 | 1.982748121 |
| 1.200056211 | 0.985545936                                                                                                                                       | 1           | 1.77764343  | 1.857758744 | 1.314050145 |
| 1.020994235 | 1.25165421                                                                                                                                        | 1.218868573 |             |             |             |
| YKL196C     | "YKL196C::YKT6::Synaptobrevin (v-SNARE) homolog with similarity to Sec22p, Snc1p, and Snc2p, essential for endoplasmic reticulum-Golgi transport" |             |             |             |             |
| 1           | 0.78977042                                                                                                                                        | 0.989018396 | 0.894791997 | 1.271805343 | 1           |
| 0.806287087 | 1.31257214                                                                                                                                        | 1.580638374 | 1           | 0.821186738 | 1.048888816 |
| 1.371777185 | 1.1223214                                                                                                                                         | 1           | 1.254548264 | 0.752756082 | 0.988874507 |
| 1.540953263 | 1                                                                                                                                                 | 1.654216139 | 1.619336629 | 2.215753348 | 1.705514624 |
| 0.976919423 | 1.246222929                                                                                                                                       | 1.042656377 | 0.832847771 | 1.046817951 | 1           |
| 1.255565416 | 2.404493928                                                                                                                                       | 1.505924282 | 0.912491879 | 1.892543445 | 1           |
| 1.417307078 | 2.05474083                                                                                                                                        | 1.13962078  | 1.994976874 | 1.496576665 |             |
| YKL198C     | YKL198C::PTK1::Putative serine/threonine protein kinase                                                                                           |             |             | 1           |             |
| 0.932114932 | 0.849077616                                                                                                                                       | 0.737243198 | 0.555827963 | 1           | 0.962748464 |
| 1.119846147 | 0.78261611                                                                                                                                        | 0.711990033 | 1           | 1.151907464 | 1.09614441  |
| 1.050502361 | 0.612618583                                                                                                                                       | 1           |             |             | 0.378354261 |
|             | 0.346795752                                                                                                                                       | 0.919856359 | 0.867017716 | 0.99719175  | 0.932711922 |
| 0.923381455 | 1                                                                                                                                                 | 0.920799822 | 0.98557183  | 1.503761168 | 1           |
| 0.771224533 | 0.898642677                                                                                                                                       | 0.775261751 | 0.788882105 | 1.612899415 |             |
| YKL200C     | YKL200C                                                                                                                                           |             |             | 1           |             |
| 1.216435139 | 0.769596419                                                                                                                                       | 1           | 0.879047404 | 1.380087273 | 0.332079812 |
| 1.181979566 | 1                                                                                                                                                 | 0.353651987 |             | 1           | 0.797817036 |
| 1.126953433 | 0.7384517                                                                                                                                         |             | 0.873064649 | 0.703186363 | 0.904241751 |
| 1.025789159 | 1.080308439                                                                                                                                       | 1           | 0.830412149 | 0.705045251 | 1.085302466 |
| 1           | 0.638162603                                                                                                                                       | 0.698430912 | 0.785305335 |             |             |
| YHR103W     | YHR103W::SBE22::functionally redundant and similar in structure to SBE2                                                                           |             |             |             |             |
| 0.924696521 |                                                                                                                                                   | 0.749890227 | 0.943157093 | 0.923739285 |             |
| 0.8281125   | 0.80164984                                                                                                                                        | 0.913869076 | 0.983676818 | 0.764242146 |             |
| 1.06318202  | 1.399796816                                                                                                                                       | 1.042552895 | 0.731659075 | 1           |             |
| 0.612130774 | 0.800772921                                                                                                                                       | 1           | 0.690665705 | 0.527654955 | 0.663416375 |
| 1.002750503 | 0.794064493                                                                                                                                       | 1           | 0.708304297 | 0.461040331 | 0.483444493 |

0.728659046 0.522351788 1 0.595133602 0.655424195 0.835749552  
 0.638193817 0.495068245 0.52012064  
 YKL214C YKL214C::YRA2::<u>Y</u>east <u>R</u>NA <u>A</u>annealing protein 1  
 1.001788356 1.245604109 0.945495721 1.187235484 1 1.012940438  
 1.150792166 1.420407399 1.342528198 1 1.037980994 1.146073527  
 1.460519614 1.030711779 1 1.354443959 0.915286455 0.952837517  
 1.322872019 1 1.462121285 2.460479494 1.755716894 1.470401218 1  
 0.787562871 0.798498823 0.732023928 0.584706907 0.865587283 1  
 1.133842997 1.465599242 1.454709545 1.039662085 1.334238768  
 0.905611962 1.121325697 0.96761722 1.037422736 0.898791754 1.081395653  
 YKL216W YKL216W::URA1::The enzyme catalyzes the conversion of dihydroorotic  
 acid to orotic acid 1 1.179716841 0.81205838 0.666812119 0.818020682 1  
 0.883723493 0.683089197 0.620124527 0.564067423 1 0.753989027  
 0.420107218 0.153354394 0.646357527 1 0.696422832 0.279111235  
 0.139136841 0.651276572 1 1.105736495 0.357536824 0.250654856  
 1.003816305 1 1.145545963 0.755175071 0.771984169 1.247475979  
 0.839057667 1 0.943459914 0.644057778 0.401257357 0.635902543  
 1.275078652 1 0.953510961 0.883931824 0.951612085 1.315059367  
 0.339283495 1.516580762  
 YHR117W "YHR117W::TOM71::Translocase of the Outer Mitochondrial membrane,  
 71.9 kDa" 1 0.751453579 0.695829899 0.82317929 0.571699314 1  
 0.747518391 0.78284666 0.678574322 0.714754426 1 0.800971817  
 0.789224517 0.598468567 0.835631226 1 0.939431452 0.832170066  
 0.696172242 0.649136842 1 1.007381366 0.886644678 1.019448626 1  
 0.991132441 1.005793612 1.33286035 1.144434371 0.992497086 1  
 1.011010236 1.02275836 1.05941273 0.913363021 0.610850087 1  
 0.941928614 0.997016452 1.119955796 0.812113188 1.061224917 0.844101524  
 YKL218C YKL218C::SRY1::Serine Racemase homolog in Yeast 1 0.999778693  
 1.222653373 1.121017375 0.889848448 1 1.05681656 1.181717996  
 1.228234714 1 1.763464935 2.519274351 1.520796627 1.218874366 1  
 2.481571217 1.777359962 1.767543832 1.411856373 1 2.843527264  
 2.957924438 2.946487518 1.63385428 1 1.091472707 1.174457889  
 1.448721007 1.204556362 1 0.978067223 1.424035406 1.332859137  
 2.009083081 1.847594247 1 1.266826254 1.111127826 1.128504949  
 1.261228101 1.582637449  
 YHR119W YHR119W::SET1::Gene has a 'SET' or 'TROMO' domain at its  
 carboxyterminus like the trithorax gene family from human and Drosophila with  
 postulated function in chromatin-mediated gene regulation. 1 0.854191686  
 0.826292578 1.060439276 0.933027749 1 0.945345306 1.137329628  
 0.98369472 0.798080524 1 1.050853765 0.845678289 0.586402599  
 0.966042584 1  
 1.093431236 1.094609299 1.349134507 1.458618375 1.075251125 1  
 0.892004515 1.07719691 0.996959224 0.556990894 0.90625565 1  
 0.931502846 0.955601997 0.725062312 1.297982562 0.822906835 1.156699286  
 YKL220C "YKL220C::FRE2::Ferric reductase, similar to Frelp" 1  
 0.9125138 1.084355772 0.705910869 1 0.951841534 1.087189546  
 0.955411032 0.903772316 1 2.338395914 12.35140734 10.64788912  
 2.325304737 1 1.520067549 2.836494299 3.612632876 1.375672749 1  
 1.573589902 0.946435314 1 1.102178201 1.019536545  
 0.973375987 0.953274402 1.2614572 1 0.88631937 1.781505674  
 1.781984445 1.471319542 1.079240911 1 1.057239686 1.106407957  
 1.070563662 1.087397894 1.097062261  
 YHR121W YHR121W::YHR121W::molecular\_function unknown 1 1.019506305  
 1.403120228 0.972948406 1.58477016 1 1.163060874 1.151802319  
 1.27938408 1.124205401 1 1.25978522 1.169468474 1.235538948  
 0.975636506 0.776217136 0.46371548 1.124994608 1  
 1.714466414 1 1.041530746 1.02569771 1.224261167

|             |                                                                                                                                                                                                                                                                   |             |             |             |             |             |
|-------------|-------------------------------------------------------------------------------------------------------------------------------------------------------------------------------------------------------------------------------------------------------------------|-------------|-------------|-------------|-------------|-------------|
| 1.108003104 | 0.973193969                                                                                                                                                                                                                                                       | 1           | 0.963248025 | 0.683949407 | 1.006390015 |             |
| 0.873580042 | 0.418822731                                                                                                                                                                                                                                                       | 1           | 1.165232072 | 0.684826229 | 1.189350062 |             |
| 0.667531841 | 0.962525205                                                                                                                                                                                                                                                       | 0.787185966 |             |             |             |             |
| YKL222C     | YKL222C::YKL222C::molecular_function                                                                                                                                                                                                                              | unknown     | 1           | 0.726848555 |             |             |
| 0.772844091 | 0.669344307                                                                                                                                                                                                                                                       | 0.781127316 | 1           | 0.751270437 | 0.727161487 |             |
| 0.897180146 | 0.789406574                                                                                                                                                                                                                                                       | 1           | 0.733546563 | 0.829588891 | 0.806264079 |             |
| 0.838047677 | 1                                                                                                                                                                                                                                                                 | 1.155103533 | 0.891642532 | 1.202787165 | 1.166145177 | 1           |
| 1.843299925 | 3.950255234                                                                                                                                                                                                                                                       | 2.414009853 | 1           | 1.09112661  | 1.140623015 |             |
| 1.020878663 | 1.03349838                                                                                                                                                                                                                                                        | 1.0319022   | 1           | 1.11035255  | 1.41360405  |             |
| 1.173403345 | 1.210461962                                                                                                                                                                                                                                                       | 1.683688388 | 1           | 1.072069704 | 1.342743412 |             |
| 1.023171467 | 1.352014792                                                                                                                                                                                                                                                       | 1.18538757  | 1.299425988 |             |             |             |
| YHR123W     | "YHR123W::EPT1::sn-1,2-diacylglycerol ethanolamine- and cholinephosphotranferase"                                                                                                                                                                                 | 1           | 1.307973536 | 0.892322403 | 0.895422715 |             |
| 0.737504756 | 1                                                                                                                                                                                                                                                                 | 1.016578806 | 0.971535985 | 0.898697441 | 0.680016028 | 1           |
| 1.176681747 | 0.906359204                                                                                                                                                                                                                                                       | 0.702858125 | 0.713865123 | 1           | 1.095565727 |             |
| 0.6529985   | 0.602762646                                                                                                                                                                                                                                                       | 0.600657938 | 1           | 1.030553466 | 0.721469544 |             |
| 0.620807399 | 0.979017948                                                                                                                                                                                                                                                       | 1           | 0.952719529 | 0.996228866 | 0.692884681 |             |
| 0.987826125 | 1.047235717                                                                                                                                                                                                                                                       | 1           | 1.384317686 | 1.107284309 | 1.384885721 |             |
| 1.03977086  | 1.299537519                                                                                                                                                                                                                                                       | 1           | 0.880896775 | 0.76021873  | 0.804017777 |             |
| 0.845739243 | 0.687436648                                                                                                                                                                                                                                                       | 0.640956762 |             |             |             |             |
| YKL224C     | YKL224C::YKL224C::molecular_function                                                                                                                                                                                                                              | unknown     | 1           | 1.077826204 |             |             |
| 1.104833114 | 1.100480501                                                                                                                                                                                                                                                       | 1.177741244 | 1           | 0.878468332 | 0.965341924 |             |
| 1.296293802 | 1.32385074                                                                                                                                                                                                                                                        | 1           | 1.124503766 | 1.083092051 | 1.645154487 |             |
| 1.23046687  | 1                                                                                                                                                                                                                                                                 | 1.230053086 | 0.961575336 | 1.39135973  | 1.504913606 | 1           |
| 1.62042996  | 2.901798461                                                                                                                                                                                                                                                       | 2.313859772 | 1.178893148 | 1           | 1.290357255 |             |
| 1.583181583 | 1.406718044                                                                                                                                                                                                                                                       | 1.288365624 | 1.143874701 | 1           | 1.048125406 |             |
| 1.97363475  | 1.426539536                                                                                                                                                                                                                                                       | 1.278467165 | 1.432205312 | 1           | 0.995307382 |             |
| 1.690680319 | 1.163644465                                                                                                                                                                                                                                                       | 1.46758427  | 1.055276469 | 1.182092421 |             |             |
| YHR125W     | YHR125W::YHR125W::molecular_function                                                                                                                                                                                                                              | unknown     | 1           |             |             |             |
| 1           |                                                                                                                                                                                                                                                                   | 2.24184777  | 1           | 2.434925615 |             |             |
|             | 0.445425089                                                                                                                                                                                                                                                       |             |             | 0.194596992 | 1           |             |
|             | 0.505159152                                                                                                                                                                                                                                                       | 0.835435519 | 1.429972172 | 0.857556346 | 1           | 0.497842112 |
| 0.317839428 | 0.457203748                                                                                                                                                                                                                                                       | 0.830741011 | 0.236716837 | 1           | 0.501815159 |             |
| 0.249830587 | 0.742368164                                                                                                                                                                                                                                                       | 0.375393833 | 0.437141388 | 0.520996305 |             |             |
| YKR013W     | "YKR013W::PRY2::Pathogen Related in Sc, contains homology to the plant PR-1 class of pathogen related proteins. The protein sequence is over 60% identical with the Pry2p & Pry3p over 145 resid. PRY1 is >35% identical (50% similar) to tobacco PR-1c protein." | 1           | 0.941740777 | 0.747114027 | 0.875178689 |             |
| 0.775782455 | 1                                                                                                                                                                                                                                                                 | 0.843441674 | 0.860601106 | 0.787483733 | 1.057314838 | 1           |
| 0.647049381 | 0.587417374                                                                                                                                                                                                                                                       | 0.536071703 | 1.313133961 | 1           | 0.450269757 |             |
| 0.346949716 | 0.262159812                                                                                                                                                                                                                                                       | 0.869017134 | 1           | 0.618500783 | 0.297350006 |             |
| 1.356973732 | 1                                                                                                                                                                                                                                                                 | 1.150769558 | 0.91878875  | 1.015760688 | 1           |             |
| 0.985358427 | 1.223573414                                                                                                                                                                                                                                                       | 0.972460545 | 0.633485208 | 1           | 0.68800703  |             |
| 0.766220779 | 0.73232841                                                                                                                                                                                                                                                        | 0.529060467 | 0.951803299 |             |             |             |
| YHR127W     | YHR127W::YHR127W::not yet annotated                                                                                                                                                                                                                               | 1           | 0.898672316 | 0.93682157  |             |             |
| 0.975666327 | 0.972977058                                                                                                                                                                                                                                                       | 1           | 0.947843954 | 0.884523844 | 0.696928197 |             |
| 1.09629937  | 1                                                                                                                                                                                                                                                                 | 0.74721807  | 0.834525234 | 0.781422895 | 1.18256542  | 1           |
| 0.571526675 | 0.966521657                                                                                                                                                                                                                                                       | 0.887095282 | 0.816579338 |             |             |             |
| 0.595749408 | 1                                                                                                                                                                                                                                                                 | 1.101223265 | 1.012348693 | 1.211175792 | 1.040497841 |             |
| 1.193132582 | 1                                                                                                                                                                                                                                                                 | 0.958208023 | 1.124455957 | 0.828434888 | 1.261712515 |             |
| 0.996786645 | 0.703354864                                                                                                                                                                                                                                                       | 1.037154918 | 1.038520228 | 1.142244085 |             |             |
| 0.843499602 | 0.837096518                                                                                                                                                                                                                                                       |             |             |             |             |             |
| YHR141C     | YHR141C::RPL42B::Homology to rat L36a and human L36a                                                                                                                                                                                                              | 1           |             |             |             |             |
| 1.03871541  | 1.271449726                                                                                                                                                                                                                                                       | 0.872079361 | 1.632797927 | 1           | 1.098456468 |             |
| 0.910362382 | 1.50188907                                                                                                                                                                                                                                                        | 1.224147048 | 1           | 0.753894978 | 0.818936028 |             |
| 0.899446406 | 0.902676311                                                                                                                                                                                                                                                       | 1           | 0.694735205 | 0.276324026 | 0.229632509 |             |
| 0.75150462  | 1                                                                                                                                                                                                                                                                 | 1.645509651 | 0.923249919 | 0.6831769   | 0.830916348 | 1           |

1.478985592 1.88286981 0.718558523 1.349207315 1.643042203 1  
1.848425386 3.108769383 2.007256238 1.569568543 1.766370437 1  
1.469826091 2.334420519 2.084478305 0.899265805  
YHR144C YHR144C::DCD1::dCMP deaminase 1 0.88796274 0.933055588  
0.990055066 1.31995599 1 0.874387177 0.845453449 1.18003965  
1.266067144 1 0.71126408 0.693942075 0.674908788 1.151065655 1  
0.687590355 0.420841849 0.412360213 0.726620713 1 0.833044234  
0.771655697 0.628071378 1 0.6192919 0.420447662 0.336111506  
0.983461738 0.916976437 1 0.328042363 0.187747183 0.094090072  
0.222159531 0.887465174 1 0.460608732 0.201009651 0.469810662  
1.612115852 1.2223513 1.211863567  
YBR175W YBR175W::SWD3::likely involved in chromatin remodeling<br>member of  
Set1p complex 1 1.194074746 1.062080922 1.135286872 1.245110825 1  
1.166880374 1.066503087 1.075280258 1.155536597 1 1.133064172  
1.075199419 1.2088926 0.983434681 1 0.785406954 0.701130243  
0.859767647 1 1.09011898 1.47944182 1.688912263 1.20187992 1  
1.074623352 1.140506839 1.061900216 0.960469324 1.131159484 1  
1.215683572 1.07107736 1.21237425 0.771115845 1 1.091095512  
0.934433512 0.953711759 0.976995622 0.952598314 0.924658939  
YBR177C YBR177C::EHT1::alcohol acyl transferase 1 1.917009405  
1.908602793 1.717603541 1 1.933731743 1.573168629 1  
1.616791858 2.057018123 1.588464183 1.57793495  
0.515725968 1 0.971910841 0.829710867  
1.027963075 0.965764229 0.692212517 1 0.881756602 0.803126247  
0.726857554 0.720827012 0.518182361 1 0.891452603 0.620829033  
0.875975181 0.939435485 0.950927634  
YBR179C YBR179C::FZO1::may be involved in mitochondrial fusion 1  
1.324568538 1.26245405 1.746968829 1.294004616 1 1.449743247  
1.456349338 1.217079643 1.216032744 1 1.27375468 0.829012363  
1.358264208 1 1.015740923 0.435398473  
0.857086996 0.869690849  
1.264490056 1.131896313 1.0502571 1 1.173723203 1.108163054  
1.209669559 0.843225912  
YBR181C "YBR181C::RPS6B::Homology to rat, human, and mouse S6" 1  
1.768343737 1.795255057 1.510574061 2.48347641 1 1.53677921  
1.238186289 1.86526854 1.834447683 1 0.954571578 1.143524993  
0.956341565 1.294770966 1 0.718490899 0.339512207 0.224906068  
0.624157691 1 1.259665701 0.593033967 0.685649294 0.629430939 1  
1.32439071 1.197665514 1.060831063 1.317551692 1.438767422 1  
1.589359237 1.635234146 1.121210231 0.734865258 1.363085325 1  
1.460887925 1.513036561 0.395014212 1.833752836 1.042072241 1.428142781  
YBR195C "YBR195C::MSI1::chromatin assembly complex, subunit 3: Encodes the  
smallest (p50) subunit of the yeast Chromatin Assembly Factor-I (CAF-I) involved  
in DNA-replication-linked nucleosome assembly. Homologous to the small subunit  
of the Human CAF-I." 1 1.001448805 0.965188892 1.35159305 0.800414931 1  
1.11283265 1.186832398 1.018176377 1.034227969 1 0.94450344  
0.948453957 0.799315114 1.245115412 1 0.68343566 0.575656924  
0.69486361 0.959876433 1 0.938311169 0.83730656 0.811692324  
0.914920607 1 0.765904645 0.834864381 0.631055094 0.641251811  
0.917087529 1.100925373 1.053944512 1.289682499 1.282108103 1  
1.01330856 1.045457057 1.156059461 1.423985964 1.090281049 0.867743381  
YBR197C YBR197C::YBR197C::molecular\_function unknown 1 1.766190426  
1.550187969 1.466321526 1.248738336 1 1.695215337 1.486592004  
1.24848495 1.410640669 1 1.423320097 1.413433442 1.059241149  
1.349396807 1.623168665 1.267417239 1.019810277  
1 1.046777432 0.914472133 1.064046924 1.12555113  
1.030767823 1.181348352 1.196336534 1.127513421 1.010537629

|         |                                                                                                                                                                                                                                                         |             |             |             |             |             |             |
|---------|---------------------------------------------------------------------------------------------------------------------------------------------------------------------------------------------------------------------------------------------------------|-------------|-------------|-------------|-------------|-------------|-------------|
|         | 1.093535419                                                                                                                                                                                                                                             | 1           | 1.043882066 |             | 1.293333285 | 0.831984663 |             |
|         | 1.25827172                                                                                                                                                                                                                                              |             |             |             |             |             |             |
| YBR199W | "YBR199W::KTR4::Putative alpha-1,2-mannosyltransferase"                                                                                                                                                                                                 |             |             |             |             |             | 1           |
|         | 0.912976252                                                                                                                                                                                                                                             | 0.978639619 | 1.178929228 | 1.054214801 | 1           | 1.105300305 |             |
|         | 1.145144661                                                                                                                                                                                                                                             | 0.898684298 | 0.938628969 | 1           | 1.077394918 | 1.241016983 |             |
|         | 0.944101541                                                                                                                                                                                                                                             | 1.122420838 | 1           | 1.459512231 | 1.284965374 | 1.276986171 | 1           |
|         | 1.569801858                                                                                                                                                                                                                                             | 0.768779993 | 1.132050576 | 1.300976195 | 1           | 1.078656799 |             |
|         | 1.42597359                                                                                                                                                                                                                                              | 1.445462961 | 1.142767038 | 1.185746005 | 1           | 1.236100079 |             |
|         | 1.476409273                                                                                                                                                                                                                                             | 1.703398378 | 1.117445056 | 1.061786148 | 1           | 1.351813819 |             |
|         | 1.296499792                                                                                                                                                                                                                                             | 1.175537426 | 1.175571864 | 1.429488956 | 0.836220905 |             |             |
| YBR201W | YBR201W::DER1::Degradation in the Endoplasmic Reticulum                                                                                                                                                                                                 |             |             |             |             |             | 1           |
|         | 1.734845352                                                                                                                                                                                                                                             | 1.855338272 | 1.35007324  | 2.269055161 | 1           | 1.398594357 |             |
|         | 1.334408915                                                                                                                                                                                                                                             |             | 1.826678204 | 1           | 1.736947129 | 1.541611894 | 2.287616754 |
|         | 1.801396238                                                                                                                                                                                                                                             | 1           | 1.642061688 | 1.325964948 | 1.331022969 | 1.669183922 | 1           |
|         | 1.858356923                                                                                                                                                                                                                                             | 2.210550675 | 3.080497926 | 1.870852106 | 1           | 1.459603124 |             |
|         | 1.535749969                                                                                                                                                                                                                                             | 1.150277602 | 1.200753237 | 1.429559968 | 1           | 1.627431167 |             |
|         | 1.813444798                                                                                                                                                                                                                                             | 1.24576914  | 2.100432859 | 1           | 1.158643761 | 1.548034728 |             |
|         | 1.129945621                                                                                                                                                                                                                                             | 1.394263137 | 1.622872504 | 1.415883994 |             |             |             |
| YBR203W | YBR203W::YBR203W::molecular_function unknown                                                                                                                                                                                                            |             |             |             |             |             | 1           |
|         | 1.145789272                                                                                                                                                                                                                                             | 1           |             | 1.768468318 | 1.203817239 | 1.072907914 | 1           |
|         | 0.982320746                                                                                                                                                                                                                                             | 1.091101893 | 1.434584711 | 1.508275739 | 1           | 0.852429372 |             |
|         | 1.118298817                                                                                                                                                                                                                                             | 0.743590389 | 1           | 0.794862109 | 2.083187705 |             | 1           |
|         | 1.034929916                                                                                                                                                                                                                                             | 1.02725836  | 1.142573152 | 1.291164803 | 1.065940963 | 1           |             |
|         | 0.647428594                                                                                                                                                                                                                                             |             | 0.967786797 | 0.857043605 | 0.691039362 | 1           | 0.661345454 |
|         | 0.591733562                                                                                                                                                                                                                                             | 0.842302467 | 0.821136718 | 0.976900359 | 0.711882332 |             |             |
| YBR205W | "YBR205W::KTR3::Putative alpha-1,2-mannosyltransferase"                                                                                                                                                                                                 |             |             |             |             |             | 1           |
|         | 1.406336073                                                                                                                                                                                                                                             | 1.019899405 | 1.378620457 | 1.261067587 | 1           | 1.259570781 |             |
|         | 1.22354345                                                                                                                                                                                                                                              | 1.054955539 | 1.214527511 | 1           | 1.134462869 | 0.999172202 |             |
|         | 0.830064712                                                                                                                                                                                                                                             | 1.103757027 | 1           | 1.024365338 | 0.700907619 | 0.706048946 |             |
|         | 0.941988834                                                                                                                                                                                                                                             | 1           | 0.910080597 | 0.420013829 | 0.599234003 | 0.799802553 | 1           |
|         | 1.349322484                                                                                                                                                                                                                                             | 1.216783648 | 1.507144403 | 1.488863587 | 1.165566583 | 1           |             |
|         | 0.964387905                                                                                                                                                                                                                                             | 0.977096584 | 1.462914556 | 0.893580356 | 0.647019432 | 1           |             |
|         | 1.06594777                                                                                                                                                                                                                                              | 0.902646689 | 1.038849965 | 0.963620935 | 0.736405335 | 0.860738375 |             |
| YHR146W | YHR146W::CRP1::Cruciform DNA Binding Protein                                                                                                                                                                                                            |             |             |             |             |             | 1           |
|         | 0.89738857                                                                                                                                                                                                                                              | 1.026458009 |             | 1.017011488 | 1.048954792 | 0.952660596 |             |
|         | 1.429836058                                                                                                                                                                                                                                             |             | 0.822241002 | 0.850404489 | 0.951212736 | 1.968746799 | 1           |
|         | 1.163637918                                                                                                                                                                                                                                             | 0.726745325 | 0.831943319 | 1.000090879 | 1           | 1.287707288 |             |
|         | 0.77627118                                                                                                                                                                                                                                              | 0.756552106 | 0.804050875 | 1           | 0.951038689 | 1.580417836 |             |
|         | 0.660007934                                                                                                                                                                                                                                             | 0.537229183 | 1.070391167 | 1           | 1.750574623 | 3.064892296 |             |
|         | 2.762787367                                                                                                                                                                                                                                             | 1.365297283 | 2.927306108 | 1           | 1.593117658 | 1.937464824 |             |
|         | 1.088699254                                                                                                                                                                                                                                             | 1.918482487 | 0.943209833 | 1.534093225 |             |             |             |
| YHR148W | YHR148W::IMP3::part of small (ribosomal) subunit (SSU) processosome (contains U3 snoRNA); Interacts With Mpp10; Imp3p is a specific component of the U3 snoRNP and is required for pre-18S rRNA processing. It is not required for U3 snoRNA stability. |             |             |             |             |             | 1           |
|         | 0.874738207                                                                                                                                                                                                                                             | 0.810004275 |             | 1.50168301  | 1           | 0.612058855 | 0.518880054 |
|         | 0.641949963                                                                                                                                                                                                                                             | 1.017018593 |             | 0.515616683 | 0.7787546   | 0.479854087 |             |
|         | 1.082360314                                                                                                                                                                                                                                             |             | 0.353906757 |             | 1.113225269 | 1           | 1.204220614 |
|         | 1.506205133                                                                                                                                                                                                                                             | 0.70173325  | 0.587017893 | 1.22880428  | 1           | 1.788183507 |             |
|         | 2.846957626                                                                                                                                                                                                                                             | 2.320851437 | 1.564627045 | 2.650472785 | 1           | 1.455284646 |             |
|         | 2.123560072                                                                                                                                                                                                                                             | 1.283690127 | 1.859535221 | 1.099327178 | 7.01374844  |             |             |
| YHR150W | YHR150W::YHR150W::molecular_function unknown                                                                                                                                                                                                            |             |             |             |             |             | 1           |
|         | 0.816510038                                                                                                                                                                                                                                             | 1.136237803 | 0.731884133 | 1           | 0.851904756 | 0.955717673 |             |
|         | 0.964551641                                                                                                                                                                                                                                             | 0.925331526 | 1           | 0.890924325 | 0.777466638 | 0.657056498 |             |
|         | 1.015586821                                                                                                                                                                                                                                             | 1           | 1.106540213 | 0.64143752  | 0.705449497 | 1.397449286 | 1           |
|         | 1.330009909                                                                                                                                                                                                                                             | 1.885115533 |             | 1.948834075 | 1           | 1.301574606 |             |
|         | 1.454401924                                                                                                                                                                                                                                             | 1.145781037 | 1.075267495 | 1           | 1.079505654 | 1.466900892 |             |

|         |                                                                                |             |             |             |             |             |
|---------|--------------------------------------------------------------------------------|-------------|-------------|-------------|-------------|-------------|
|         | 1.613639104                                                                    | 1.084622507 | 1.393893554 | 1           | 1.282353965 | 1.479142369 |
|         | 1.124278353                                                                    | 1.747265087 | 1.129214894 | 1.189097427 |             |             |
| YHR164C | YHR164C::DNA2::DNA replication helicase                                        | 1           |             |             | 1.367930142 |             |
|         | 1.498422803                                                                    | 1.103043239 | 1.525276132 | 1           | 1.434222046 | 1.509907601 |
|         | 1.326592315                                                                    | 1.354967888 | 1           | 1.226464254 | 1.260044914 | 1.224733354 |
|         | 1.176740474                                                                    | 1           | 0.676825589 | 0.447328428 | 0.491378253 | 0.625418595 |
|         | 0.848720938                                                                    | 1.352451793 | 1.160432494 | 0.727896042 | 1           | 1.083455957 |
|         | 1.261387798                                                                    | 0.944481251 | 0.993484216 | 1.09338763  | 1           | 1.257991027 |
|         | 1.455380685                                                                    | 2.528278952 | 2.628423238 | 0.712091127 | 1           | 1.843452297 |
|         | 1.48685196                                                                     | 1.501034644 | 1.233802522 | 1.08452002  |             |             |
| YHR166C | YHR166C::CDC23::Required for mitosis and RNA synthesis                         | 1           |             |             |             |             |
|         | 0.811893071                                                                    | 0.933135994 | 1.000943462 | 1.031345193 | 1           | 1.020606822 |
|         | 1.001750631                                                                    | 1.034348368 | 1.03715722  | 1           | 0.867062505 | 0.879152904 |
|         | 0.736092922                                                                    | 1.051152607 | 1           | 0.807114783 | 0.575277721 | 0.829353972 |
|         | 0.832780576                                                                    | 1           | 1.198852581 | 1.326010645 | 1.564274775 | 1.132246265 |
|         | 1.166058192                                                                    | 1.10412501  | 1.145727706 | 1.214831596 | 1.063833272 | 1           |
|         | 0.994436583                                                                    | 0.679386544 | 0.918033907 | 1.094770991 | 0.72672453  | 1           |
|         | 0.908204584                                                                    | 0.847144099 | 0.684862217 | 0.888959113 | 0.574492324 | 0.839723408 |
| YHR168W | YHR168W::YHR168W::molecular_function unknown                                   | 1           |             |             | 1.143008968 |             |
|         | 1.196270899                                                                    | 1.332984483 | 1.153912819 | 1           | 1.308779877 | 1.43956032  |
|         | 1.325748903                                                                    | 1           | 1.005801421 | 1.202806924 | 0.953468729 | 1.127629088 |
|         |                                                                                | 0.890877912 | 0.696455704 |             | 0.722947698 | 1           |
|         | 1.077386642                                                                    | 1.165358595 | 1.018867161 | 0.981354949 | 1.336008981 | 1           |
|         | 0.807556717                                                                    | 1.310077627 | 1.782404965 | 1.012449602 | 1.436126162 | 1           |
|         | 0.916895563                                                                    | 1.135433728 | 0.923885963 | 1.280751631 | 0.75662268  | 1.363346604 |
| YHR170W | YHR170W::NMD3::putative Upflp-interacting protein                              | 1           |             |             |             |             |
|         | 0.901357894                                                                    | 0.594116214 | 0.89252091  | 0.84756953  | 1           | 0.764872651 |
|         | 0.598267512                                                                    |             | 0.855242609 | 1           | 0.600421243 | 0.324895237 |
|         | 0.858496995                                                                    |             | 1.294625986 | 0.40721606  | 0.323847705 | 1.075483825 |
|         | 0.616447217                                                                    | 0.153187041 | 0.139147863 | 0.485898513 | 1           | 0.854368528 |
|         | 0.837036185                                                                    | 0.841712771 | 0.739039171 | 1.09883882  | 1           | 1.120308627 |
|         | 0.842947026                                                                    | 1.256437168 | 1.004615841 | 0.781820303 | 1           | 0.908198222 |
|         | 0.701205218                                                                    | 0.84378003  | 1.053473857 | 0.870009241 | 1.668063695 |             |
| YHR172W | YHR172W::SPC97::Spindle Pole Body component with an molecular weight of 97 kDa | 1           |             |             |             |             |
|         | 1.224503822                                                                    | 1.213340703 | 1.385537414 | 1.213077878 | 1           |             |
|         | 1.279589397                                                                    | 1.307303837 | 1.153983547 | 1.030622525 | 1           | 1.063311066 |
|         | 1.099762015                                                                    | 0.816205716 | 1.372374794 | 1           |             | 0.996101429 |
|         | 0.733019523                                                                    | 1           | 0.88601605  | 1.330802792 |             | 1           |
|         | 0.8329798                                                                      | 0.564421959 | 0.782135535 | 0.96648393  | 1           | 0.674951091 |
|         | 0.790616424                                                                    | 0.761176549 | 0.76888836  | 0.865403218 | 1           | 0.961634475 |
|         | 0.850999944                                                                    |             | 1.369701149 |             |             |             |
| YHR174W | YHR174W::ENO2::enolase                                                         | 1           |             |             | 1.231484517 | 0.815465262 |
|         | 0.373287611                                                                    | 1           | 1.101516538 | 1.025621749 | 0.459871783 | 0.502136265 |
|         | 1.160431606                                                                    | 1.082505558 | 1.0975563   | 0.417527738 | 1           | 1.425178934 |
|         | 1.056820611                                                                    | 1.852729597 | 1.060265178 | 1           | 0.725865453 | 0.7214214   |
|         | 0.786745992                                                                    | 0.692757604 | 1           | 0.894207257 | 0.85877518  | 1.135899202 |
|         | 1.045109801                                                                    | 0.870622799 | 1           | 1.306435085 | 1.024350706 | 0.909257498 |
|         | 1.35459307                                                                     | 0.691209914 | 1           |             | 0.95254568  | 0.896045577 |
|         | 0.640995889                                                                    | 1.085773768 |             |             |             |             |
| YHR188C | YHR188C::GPI16::Glycosyl Phosphatidyl Inositol 16                              | 1           |             |             |             |             |
|         | 0.989190057                                                                    | 0.82255709  | 0.759772778 | 0.518931784 | 1           | 1.007216917 |
|         | 0.943443944                                                                    | 0.585950942 | 0.588871845 | 1           | 1.01836611  | 0.987930741 |
|         | 0.740512396                                                                    | 0.632874524 | 1           | 1.391034172 | 1.062273389 | 1.395517557 |
|         | 1.011580872                                                                    | 1           | 0.671026864 | 0.684174483 | 0.550681834 | 0.595530314 |
|         | 1.200291047                                                                    | 0.616984869 | 1.246694626 | 1.272105716 | 0.772210591 | 1           |
|         | 0.955220303                                                                    | 0.706624067 | 1.201105194 | 1.300112965 | 0.291237618 | 1           |
|         | 1.2858221                                                                      | 0.59364404  | 0.501978372 | 0.661041894 |             | 1.188221762 |



YBR219C YBR219C::YBR219C::molecular\_function unknown 1 1.67371808  
1.639082975 1.359734912 1.960226599 1 1.411813991 1.306424973  
1.6664379 1.688365993 1 1.311477393 1.215770039 1.590406531  
1.335655877 1 0.633434626 0.497854567 0.461271371 0.897093245 1  
1.089769144 1.809210468 1.057108676 0.825015762 1 1.259688342  
1.085834046 0.81078946 0.927080872 0.975950346 1 0.885835014  
1.003332998 1.038228679 0.718446104 1.451793505 1 0.917818039  
1.48961478 1.124679111 1.941713948 1.351500724 1.238132366  
YBR221C YBR221C::PDB1::beta subunit of pyruvate dehydrogenase (E1 beta) 1  
1.717904534 1.128277465 1.481972957 0.95830003 1 1.601489303  
1.612064258 1.178586289 1 1.512152147 1.297367243 0.965304953  
0.977666631 1 0.932604337 0.836246265 0.942277762 1.028496137 1  
0.72429095 0.425497681 0.534558185 0.747969503 1 1.36188497  
1.222504848 1.530029736 1.540281266 1.012754397 1 0.792358319  
0.925926762 1.151059411 0.793714399 0.798442306 1 0.925830085  
0.923786477 1.023147274 1.066921134 1.001648282 0.800320314  
YBR223C YBR223C::TDP1::Tyrosine-DNA Phosphodiesterase 1 1.227386243  
1.380499307 1.477327195 1.271585071 1 1.566256918 1.654615115  
1.045836951 1.139091554 1 1.680004037 1.440550195 1.135703988  
1.157178855 1 1.168563074 0.73366343 1.041461512 0.751000312 1  
1.078595082 1.273544445 0.501140869 0.689713233 1 1.082762309  
0.929194826 1.009592794 1.001003218 1 1.03348757 0.721750152  
1.007842441 0.900206654 0.830230404 1 1.050764858 0.893222358  
0.958402356 0.804523767 1.028795102 0.796817863  
YBR225W YBR225W::YBR225W::molecular\_function unknown 1 1.230416832  
1.272312829 1.24921761 1.186085093 1 1.306060987 1.21213852  
1.02962892 1.099723564 1 1.31253663 1.306440553 1.195301718  
1.114408025 1 1.039585809 0.500107308 0.721055557 1.024955144 1  
1.117523331 1.425598048 0.767717208 1 0.810384021 0.850401241  
0.657625831 0.783532381 0.945572838 1 1.034176815 0.906768  
1.008297555 0.885530818 1 1.126053828 1.179987923 0.989730431  
1.205482315 1.039038806 0.911524592  
YBR227C "YBR227C::MCX1::Mitochondrial ATP-binding protein, similar to ClpX"  
1 1.033125416 1.200614941 1.273536469 1.297679025 1 1.104573682  
1.117750715 1.179991033 1.215488984 1 1.108204951 1.191391188  
1.157068704 1.243914657 1 0.800347704 0.688457396 1.054448456  
0.843967904 1 0.693869446 0.674441382 0.478529941 0.411016907  
1.07506783 1.174431697 2.012868883  
0.927994975 0.996435366 0.887882787  
YBR229C "YBR229C::ROT2::Reversal of tor2 lethality. Involved in Beta-1,6-  
glucan synthesis." 1 1.160078756 0.940878342 1.60717783 0.930007262 1  
1.410502923 1.392695369 0.958279505 1.009137455 1 1.31972647  
1.62920924 0.903020946 1.603625552 1 0.800039501 1.241168527  
1.077138934 1 0.684408124 0.542188589 0.344141306 0.591028555 1  
0.964275211 1.047108173 1.136154171 0.867402652 1 1.018903032  
0.836507635 1.034313823 0.987904221 0.475943325 1 0.948485738  
0.78681002 0.674959193 0.994058537 0.563901851  
YBR243C YBR243C::ALG7::ER protein that transfers Glc-Nac-P from UDP-GlcNac  
to Dol-P 1 1.57843723 1.088806183 1.262563941 0.889236588 1  
1.417683669 1.377906862 0.82396888 1.033763838 1 1.401643132  
1.180442498 0.814572655 1.034153052 1 1.381561341 0.872463305  
0.685945184 1 0.825660745 0.389922387 0.301662543 0.413378134 1  
1.398603677 1.205519892 1.497872461  
0.995258953 0.843225912  
YBR245C YBR245C::ISW1::has strong homology to Drosophila ISWI  
0.96286644 1.016964482 0.943510168  
0.763165076 0.97409406 0.540745968 0.871483863

1 0.969488996 1.95177547  
1.001612415 0.780621585 0.954410829  
0.927976977 0.838793876 1.004340689  
YBR247C YBR247C::ENP1::Essential nuclear protein 1 0.920608058  
0.672158655 1.036781962 0.863562772 1 0.899662404 0.85157904  
0.78447618 1.069004321 1 0.596140344 0.427556463 0.277608264  
1.003303786 1 0.30092424 0.155940776 1 0.275535696  
1.044253839 0.833883323 0.756734187 1.022880474  
1.04873167 1 0.707452519 0.736472827 0.63554889 0.995097532  
1.194542493 1 0.646353031 0.693935348 0.831545603 1.101048063  
0.504746779 0.786310354  
YBR249C YBR249C::ARO4::3-deoxy-D-arabino-heptulosonate 7-phosphate (DAHP)  
synthase isoenzyme 1 1.186595302 0.941827315 1.031047533 0.943435622 1  
1.292694263 1.074832614 0.882347773 1 1.383976487 1.335703783  
0.640042556 0.749527897 1 0.939279727 0.57957175 0.294152615  
0.287368953 1 1.102119798 0.325460258 0.303330847 0.551170825 1  
1.033250808 0.837384725 0.671434341 1.086828334 0.906012667 1  
1.054345057 0.812669212 0.714428693 0.608930047 0.888879186 1  
1.137351653 0.89370507 0.642873913 1.056010818 0.749508123 0.797693476  
YHR190W YHR190W::ERG9::squalene synthetase 1 0.980457379 0.868494782  
0.991385017 0.724911466 1 1.120656714 1.091581067 0.827386  
0.883458274 1 0.892751926 1.124243762 0.986406418 0.742268992 1  
1.630381749 1.412534265 1.577987395 1.242113811 1 1.273358144  
1.111551685 1.269723971 1.257996336 0.878770948 0.707788363  
0.904241751 1.024819675 0.707128429 1 1.213179564 1.042610219  
1.125179972 0.951193925 1 0.968595614 1.25448467 0.758554089  
1.43252504 0.811755417 0.815205939  
YHR192W YHR192W::molecular\_function unknown 1 0.79823525  
0.983630545 0.87918875 1 0.835391044 0.838567781 0.976049059  
1.158749976 1 0.897706683 0.910430928 0.987282048 1.042883855 1  
1.485932529 0.90561416 1.33126971 1 1.264425577 1.187659086  
1.299250098 1.326254778 1 0.854984999 0.965132936 0.955606596  
0.870977328 0.899761184 1 0.773355466 0.763121118 0.910892976  
1.596467747 1.168404245 0.78201825 1.469039984 1.127018987  
0.448319509  
YHR194W YHR194W::molecular\_function unknown 1 0.817823595  
0.838834319 0.904540194 0.576873743 1 1.043356771 1.1354757  
0.645373498 0.761769139 1 1.104670568 0.998864948 0.779462416 1  
1.342260569 1.036662082 1.428331853 1.094783891 1 1.041565855  
1.431979039 1.530592112 0.621086788 1 1.062936683 1.206196804  
1.062774876 0.986923249 0.978942262 1 1.052327787 1.044560431  
0.87289239 0.890563753 1.053712641 1 0.662303495 0.687059772  
1.015575273 0.431885675 1.084022543  
YHR196W YHR196W::UTP9::part of small (ribosomal) subunit (SSU) processosome  
(contains U3 snoRNA) 1 0.682133646 0.717126826 0.901911292 1.050490066 1  
0.78620714 0.621298014 0.962643336 0.92725475 1 0.392326659  
0.364983613 0.348788882 0.902271132 1 0.611104639 0.522200935  
0.508753992 1 0.39566597 0.466993336 0.358958352 0.633951251 1  
1.465787926 1.162247086 1.202641265 1.395524156 1.600938407 1  
0.625510993 1.10502972 1.151897612 0.550003598 1 0.798077039  
0.706280306 0.638072675 0.823485617 0.517559326 0.950927634  
YHR198C YHR198C::molecular\_function unknown 1 1.317922906  
1.234798655 1.217053435 1.468899409 1 1.191435089 1.296443606  
1.156328479 1.372770271 1 1.159570559 1.220473598 1.55819976  
1.181411727 0.728750621 0.727312455 1.025973043 1  
1.411079489 1.615381766 1.526967009 1 1.512998309 1.549321722  
1.259625875 1.125109061 1 1.683558219 1.039606165 3.092514346

|         |                                                                                                                  |             |             |             |             |             |             |
|---------|------------------------------------------------------------------------------------------------------------------|-------------|-------------|-------------|-------------|-------------|-------------|
|         | 2.008737008                                                                                                      | 0.73795269  | 1           | 1.314447401 | 1.083144453 | 0.971023743 |             |
|         | 0.595193031                                                                                                      | 1.019226366 |             |             |             |             |             |
| YHR212C | YHR212C::YHR212C::molecular_function unknown                                                                     |             |             |             |             | 1           | 0.876139752 |
|         | 0.970463128                                                                                                      | 0.996399796 | 1.116046961 | 1           | 1.136411936 |             |             |
|         | 1.07115937                                                                                                       | 1           | 0.806342758 | 0.945564954 | 1.03466895  | 1.07700727  | 1           |
|         | 0.890311461                                                                                                      |             | 1.655157269 | 1.054872673 | 1           | 0.577533113 | 1.64999198  |
|         | 1.19821802                                                                                                       | 0.591175186 |             | 0.772633681 | 0.670972304 | 0.816343436 |             |
|         | 1.041302071                                                                                                      | 0.841090496 | 1           | 0.650983747 | 0.646109726 | 0.823231725 |             |
|         | 0.7048088                                                                                                        | 1.06798873  | 1           | 1.247073983 | 1.147530579 | 1.116308178 |             |
|         | 0.718196527                                                                                                      |             |             |             |             |             |             |
| YHR214W | YHR214W::YHR214W::molecular_function unknown                                                                     |             |             |             |             | 1           |             |
|         | 0.668490606                                                                                                      |             | 0.54492375  | 1           | 1.028416079 | 0.685031128 | 1           |
|         | 1.100971754                                                                                                      | 0.824120463 | 0.422065439 | 0.903699849 |             | 1.59710862  |             |
|         | 1.758041565                                                                                                      | 2.093713054 | 1.108490986 | 1           | 0.807728045 | 0.626646637 |             |
|         | 0.593709096                                                                                                      | 0.668127373 | 1           | 0.979918077 | 0.966876394 | 1.119233506 |             |
|         | 1.274403142                                                                                                      | 0.946206842 | 1           | 0.536268222 | 0.385782441 | 0.596002233 |             |
|         | 0.379347697                                                                                                      | 0.057782531 | 1           | 0.7900911   | 0.554053255 | 0.619691243 |             |
|         | 0.290261243                                                                                                      | 0.520919459 | 0.647961768 |             |             |             |             |
| YHR216W | YHR216W::IMD2::IMP Dehydrogenase                                                                                 |             |             |             |             | 1           | 0.959173524 |
|         | 0.73928312                                                                                                       | 0.815808545 | 1           | 0.954253975 | 0.795242202 | 0.597612203 |             |
|         | 0.687807921                                                                                                      | 1           | 0.911565008 | 0.589929324 | 0.315167458 | 0.60305696  | 1           |
|         | 1.2968306                                                                                                        | 0.593987853 | 0.394304871 | 0.485622776 | 1           | 0.665509082 |             |
|         | 0.352117509                                                                                                      | 0.186170152 | 0.439271857 | 1           | 0.919878066 | 0.769700937 |             |
|         | 0.812544272                                                                                                      | 0.972968183 | 0.782323638 | 1           | 1.040270638 | 0.898210837 |             |
|         | 0.720398721                                                                                                      | 0.54121163  | 0.893690904 | 1           | 0.94161958  | 0.775561034 |             |
|         | 0.673585534                                                                                                      | 0.974046738 | 1.077678254 | 0.868618994 |             |             |             |
| YHR218W | YHR218W::YHR218W::molecular_function unknown                                                                     |             |             |             |             | 1           | 0.650754721 |
|         | 0.499064114                                                                                                      | 0.815887884 | 0.337008207 | 1           | 0.92499431  | 1.034019393 |             |
|         | 0.589740333                                                                                                      | 0.399710509 | 1           | 0.688756911 | 0.666244825 | 0.154864146 |             |
|         | 0.610452172                                                                                                      | 1           | 0.722154793 | 0.64458409  | 0.679896502 | 0.430878773 | 1           |
|         | 0.591921619                                                                                                      | 0.440724764 | 0.344279389 | 0.791255104 | 1           | 0.799441641 |             |
|         | 0.853795629                                                                                                      | 1.239092787 | 1.206826682 | 0.937953015 | 1           | 0.779909859 |             |
|         | 0.43330906                                                                                                       | 0.811298869 | 1.123187824 | 0.398501617 | 1           | 0.648878891 |             |
|         | 0.498498338                                                                                                      | 0.953985779 | 0.537684147 | 0.835221426 |             |             |             |
| YIL001W | YIL001W::YIL001W::molecular_function unknown                                                                     |             |             |             |             | 1           | 1.355626838 |
|         | 1.261745512                                                                                                      | 1.341560153 | 1.772762727 | 1           | 1.324565733 | 1.256694212 |             |
|         | 1.423741051                                                                                                      | 1.419334104 | 1           | 1.050493735 | 1.040968496 | 1.274071497 |             |
|         |                                                                                                                  |             |             |             | 1           | 1.097950763 |             |
|         | 1.1456998                                                                                                        |             | 0.998992368 | 1.071262107 | 1           | 0.96805906  | 0.978099125 |
|         | 0.984278097                                                                                                      | 0.819695984 | 0.956063751 |             | 1.026057225 | 1.077100358 |             |
|         | 0.90922653                                                                                                       |             | 1.067021109 | 1.106788787 |             |             |             |
| YNR073C | YNR073C::YNR073C::molecular_function unknown                                                                     |             |             |             |             |             | 1           |
|         | 0.719514895                                                                                                      |             | 1.626820542 | 1.544002205 | 1           | 0.787455131 | 2.425203733 |
|         | 0.786980231                                                                                                      | 1.05049885  |             |             |             | 0.879365396 | 1           |
|         | 0.733214282                                                                                                      | 1.274156173 |             |             |             | 0.667659557 | 1.10629514  |
|         | 0.369957592                                                                                                      |             |             |             |             |             |             |
| YOL010W | YOL010W::RCL1::protein similar to the RNA 3' terminal phosphate cyclase (RNA 3' terminal phosphate Cyclase-Like) |             |             |             |             | 1           | 0.875164779 |
|         | 0.833572742                                                                                                      | 0.967518441 | 1.062320264 | 1           | 0.795342491 | 0.73899763  |             |
|         | 1.192115082                                                                                                      | 1.475798332 | 1           | 0.358739614 | 0.366091962 | 0.415808097 |             |
|         | 1.05369802                                                                                                       | 1           | 0.236067352 | 0.233294629 | 0.353814518 | 0.82751226  |             |
|         | 0.281728412                                                                                                      |             | 0.287135458 | 0.747948217 | 1           | 0.656618885 | 0.612667094 |
|         | 0.671790086                                                                                                      | 0.926419285 | 0.86760988  | 1           | 0.411962128 | 0.57251213  |             |
|         | 0.412585615                                                                                                      | 0.737116223 | 1.076855064 | 1           | 0.487732762 | 0.587273288 |             |
|         | 0.868454712                                                                                                      | 1.096615854 | 0.578315261 | 1.085773768 |             |             |             |

YOL012C YOL012C::HTZ1::Histone-related protein that can suppress histone H4  
point mutation 1 1.694822754 1.702830916 1.064432683 2.125943006 1  
1.158320418 1.181322296 1.57194141 1.58379567 1 1.189728973  
1.326905122 1.369714894 1.265357284 1 1.272921381 0.855560223  
0.695842521 0.918167688 1 1.928965551 2.310139224 1.857223258  
0.966635019 1 1.243817796 0.98572826 0.72904256 1.024638098  
0.860641133 1 0.935739744 1.03432507 0.77654481 0.59359898  
1.143907619 1 1.321265662 1.318873948 1.186286264 1.891063651  
1.794427308 1.464918933  
YOL014W YOL014W::YOL014W::molecular\_function unknown 1 1.408374238  
1.334413854 1.280448119 1.386688425 1 1.27052699 1.170162678  
1.295260108 1.405690673 1 1.50089714 1.664234563 1.055987993 1  
1.095143947 0.5820835 1  
0.899683963 1.180628914 1.179298931 1.272009769 0.968336097  
1.208506783 1.097928446 0.767602152 1.070567339 1 0.921903119  
0.810144645 0.90250059 0.823741819 1.405376537  
YOL014W YOL014W::YOL014W::molecular\_function unknown 1 1.452921178  
1.4080068 1.224170445 1 1.168058791 1.183511661 1.337699798  
1 1.175499743 1.202032594 1.286084641 1.409831576  
1 1.119441249 1.090218682  
1.217895561 1.136032262 1.151232811 1 1.085926805 1.01083555  
1.006172915 0.993282496 1.075804805 1 0.90093752 1.063195667  
0.985046269 1.20081037 0.985308447 1.251266714  
YOL018C YOL018C::TLG2::member of the syntaxin family of t-SNAREs 1  
0.989432584 1.49714952 1 0.934106271 1.087575231  
1.551582048 1.404123821 1 1.077843232 0.670163468 0.99961431 1  
0.426437429 0.740074954 0.942776311 1 1.306984355  
2.732258166 1 1.050069583 1.441459094 0.952671888 0.770819268  
1.19365818 1 1.384390636 1.546682875 1.862117666 1.187565007  
1.529240695 1 1.51598344 1.609021868 1.272090863 1.117352517  
1.470850294 0.790688469  
YOL020W "YOL020W::TAT2::Tryptophan permease, high affinity" 1  
0.873299714 0.655989872 0.860967066 0.517878846 1 0.974953469  
0.890941542 0.596214815 0.635220204 1 0.896047938 0.757792539  
0.722732275 0.636812176 1 0.531810001 0.12000894 0.395392394  
0.342380249 1 0.838998039 0.934264462 0.684953645 1.003737375 1  
0.871331836 0.795519928 1.142494036 1.119085363 0.828765535 1  
0.639203137 0.655047375 0.882269799 0.787191442 0.533555731 1  
0.623594626 0.594398312 0.776759598 0.531819089 0.644812537 0.644459265  
YOL129W YOL129W::VPS68 1 1.881760181 1.825492357 1.407406585  
2.09710071 1 1.508501422 1.430548082 2.24940809 1.889073738 1  
1.497759751 1.932473081 3.071585375 1.569291087 1 1.730175433  
1.334792763 1.982984879 1.682576924 1 2.003646233 2.543445122  
2.554008787 1.663168797 1 1.361777932 1.531555636 1.526697225  
1.280639054 1.015026565 1 1.277426142 2.016811914 1.709506694  
1.041437223 1.498397864 1 1.051603079 1.559214567 0.975323647  
1.544233663 1.203002495 1.482431396  
YBR251W YBR251W::MRPS5::Probable mitochondrial ribosomal protein S5 1  
1.034920128 1.252612292 1.58327036 1 1.138937468 1.207605642  
1.441221114 1.404150223 1 1.014925256 1.0514239 1.298452615  
1.305619627 1 0.892879444 0.678440762 0.821520681 1.46449149 1  
1.460300758 1.368453547 1.649459545 0.938679824 1 1.144219701  
1.167083308 0.883748577 0.790782438 1.045725191 1 1.197436774  
1.33972531 1.184630137 0.891323485 1.534057981 1 1.357277805  
1.239012388 1.006484067 1.173880674 1.659921546 1.429894006  
YOL131W YOL131W::YOL131W::molecular\_function unknown  
1.054446696 0.894578924

|         |                                                                                                                        |               |               |                                    |
|---------|------------------------------------------------------------------------------------------------------------------------|---------------|---------------|------------------------------------|
| 1       | 1.099650689                                                                                                            | 1.763521397   | 1.97455648    | 0.245639232                        |
|         | 0.858792199                                                                                                            |               |               | 1                                  |
|         | 0.955832909                                                                                                            | 1             | 0.633803225   | 0.176471135                        |
| YBR253W | YBR253W::SRB6::involved in transcription as part of Srb/Mediator complex                                               |               |               |                                    |
|         | 1                                                                                                                      | 0.966514642   | 1.619361071   | 1.077972734 1.390536453 1          |
|         | 1.014489256                                                                                                            | 0.956277257   | 1.974876166   | 1.70782075 1 1.055284755           |
|         | 1.525453841                                                                                                            | 2.222222265   | 1.541514392 1 | 1.20615271 0.821157713             |
|         | 0.893345712                                                                                                            | 1.583570829 1 | 1.954267123   | 2.808851739 2.750076536            |
|         | 1.358724273 1                                                                                                          | 1.010447632   | 1.112407244   | 0.87085609 0.817545584             |
|         | 0.98166884 1                                                                                                           | 0.890078249   | 0.711508878   | 1.062685981 1.278431744            |
|         | 1.36148454 1                                                                                                           | 1.139172522   | 1.185072265   | 1.403754282 1.044431824            |
|         | 2.048084524                                                                                                            |               |               |                                    |
| YOL133W | YOL133W::HRT1::High level expression Reduces Ty3 Transposition 1                                                       |               |               |                                    |
|         | 1.498747847                                                                                                            | 1.735686097   | 1.571161097   | 1.843130884 1 1.310903853          |
|         | 1.367272887                                                                                                            | 1.925757022   | 1.664111661 1 | 1.270049281 1.858267736            |
|         | 2.14166279                                                                                                             | 1.419509861 1 | 1.194631334   | 1.377194884 1.116867548            |
|         | 1.477819861 1                                                                                                          | 1.258747589   | 1.14719914    | 1.36359604 1.208107735 1           |
|         | 1.50563979                                                                                                             | 1.61596409    | 1.896239197   | 1.343469724 1.527558648 1          |
|         | 1.057574655                                                                                                            | 1.864074386   | 1.248228004   | 1.221736381 1.05351382 1           |
|         | 1.496039582                                                                                                            | 1.419699348   | 1.404874471   | 1.42937243 1.312351009 0.981574549 |
| YBR267W | YBR267W::YBR267W::molecular_function unknown 1 1.147859393                                                             |               |               |                                    |
|         | 1.231410792                                                                                                            | 1.449906483 1 | 1.069366599   | 1.005121936 1.295260008            |
|         | 1.715155956 1                                                                                                          | 0.704494973   | 0.703580922   | 0.758706573 1.499106818 1          |
|         | 0.29493561                                                                                                             | 0.355681364   | 0.690975896 1 | 0.414563606 0.449945062            |
|         | 0.364403282                                                                                                            | 0.381663948 1 | 0.480497757   | 0.536406436 0.802575925            |
|         | 0.804483993 1                                                                                                          | 0.51126239    | 0.840534671   | 0.935837175 1.330166051 1          |
|         | 0.539900564                                                                                                            | 0.823605152   | 1.028050117   | 0.579388179 0.890509573            |
| YOL135C | YOL135C::MED7::Member of RNA Polymerase II transcriptional regulation mediator 1 0.889329869 1.197111094 0.852772259 1 |               |               |                                    |
|         | 0.963994282                                                                                                            | 1.072356575   | 1.097663849   | 0.983002185 1 1.178208194          |
|         | 1.181036621                                                                                                            | 1.285979573   | 0.924242098 1 | 1.143353001 0.998467798            |
|         | 1.034125691                                                                                                            | 1.064752016 1 | 1.53709873    | 1.818902875 1.311053256            |
|         | 1.299742092 1                                                                                                          | 1.328947409   | 1.066710304   | 1.009996505 1.095719181            |
|         | 1.052478743 1                                                                                                          | 1.191288582   | 1.475760988   | 1.049911955 1.519949537            |
|         | 1.137038972 1                                                                                                          | 0.886688996   | 0.935224408   | 0.767411744 1.004731313            |
|         | 0.654466745                                                                                                            | 1.804661159   |               |                                    |
| YBR269C | YBR269C::YBR269C::molecular_function unknown 1 1.702459449                                                             |               |               |                                    |
|         | 2.436495081                                                                                                            | 1.408857168   | 2.497522011 1 | 1.608582228 1.742503963            |
|         | 2.093720631                                                                                                            | 1.898644798 1 | 1.799844687   | 2.456509648 4.910382946            |
|         | 1.750540219 1                                                                                                          | 1.818137846   | 1.492669588   | 1.997770539 2.567684187 1          |
|         | 2.283182188                                                                                                            | 3.448431722   | 4.07046884    | 1.87672664 1 1.442988904           |
|         | 1.798611966                                                                                                            | 1.603007058   | 1.109195679   | 1.138027676 1 1.160516589          |
|         | 1.803893611                                                                                                            | 1.924491698   | 1.285710866   | 1.325951828 1 1.425016362          |
|         | 1.492023919                                                                                                            | 1.150548877   | 1.456831278   | 1.75562622                         |
| YBR271W | YBR271W::YBR271W::molecular_function unknown 1 1.115405784                                                             |               |               |                                    |
|         | 0.964386117                                                                                                            | 1.16864984    | 1.143176408 1 | 0.984810109 0.987665701            |
|         | 1.520651083                                                                                                            | 1.412339464 1 | 0.659597948   | 0.571602706 0.628902652            |
|         | 1.259919581 1                                                                                                          | 0.422771117   | 0.33699229    | 0.821886929 1                      |
|         | 0.492319475                                                                                                            | 0.476851072   | 0.498042492   | 0.566331051 1 0.713609822          |
|         | 0.497425801                                                                                                            | 0.632532171   | 0.852246632   | 0.918518327 1 0.681660022          |
|         | 0.663850375                                                                                                            | 0.902251911   | 1.178919409 1 | 0.597687287 0.582741353            |
|         | 0.862969213                                                                                                            | 0.948926897   | 0.665218616   | 1.005216354                        |
| YBR273C | YBR273C::YBR273C::molecular_function unknown 1 1.160214915                                                             |               |               |                                    |
|         | 1.50197216                                                                                                             | 1.613384844   | 1.548787059 1 | 1.442991864 1.425383642            |
|         | 1.312628076                                                                                                            | 1.472970532 1 | 1.280097288   | 1.754959905 1.468741411            |
|         | 1.551780074 1                                                                                                          | 1.428608355   | 1.301928978   | 1.155907585 1                      |

1.930955312 1.87863696 1.08305669 1.212391248  
1.00758619 1.141136798 1.238932476 1.443085663 0.986521174  
1.11014165 0.964489187 1.057609658 1.073514981  
YBR275C "YBR275C::RIF1::RAP1-interacting factor, involved in establishment  
of repressed chromatin" 1 2.151706985 2.329455096 2.307211433 2.414824026 1  
2.186305633 2.003120457 2.030461143 1 1.650384843  
1.667715418 2.149478695 1 0.664670725 1.006800795 1  
0.851380697 0.745620563 1.203744992 1  
1.020975432 1.654194259 1.254448673 0.774656265  
1.08544134 2.003936926 0.842323188 2.84840489  
YBR275C "YBR275C::RIF1::RAP1-interacting factor, involved in establishment  
of repressed chromatin"  
1 1.042835512 1.045664689 0.964427213 1  
0.931643351 1.030283815 0.960050927 1 1.109768359  
1.487143373 1.39971844 1.387282985 1.170709299  
YBR277C YBR277C::YBR277C::molecular\_function unknown 1 1.392295464  
1.600029792 2.430296235 1.435101085 1 1.766645897 1.52276531  
2.536691225 1.97572717 1 1.153078502 1.795833585 1.564679516  
2.083093395 1 1.35146718 0.99471877 0.765903677 1  
1.214526965 1.038948986 1.017282348 1 0.973817414  
0.970226544 1.030083647 1.070164074 1.044411944 1.157391696  
1.487820675 0.830617763 0.758413101 1.23407405  
0.853733421  
YBR291C YBR291C::CTP1::citrate transport protein 1 1.69105049  
1.616728797 1.615230486 1.802557998 1 1.6154288 1.524150895  
1.664155778 1 1.353393497 1.542990687 1.480175526 1.703321514 1  
1.463191174 2.615178978 2.887055528 0.495935141 0.82971848  
0.94015662 1.271946733 1 0.888970625 0.699946885 1.097439628  
1.210193855 0.968336097 1.045425367 1.06067341 1.047485954  
3.246154062 1 0.685438137 0.685481544 1.237879354 1.248060859  
1.303804103  
YBR293W YBR293W::YBR293W::not yet annotated 1 1.607975023 1.164105883  
1.356448739 1.312211619 1 1.430237117 1.398003949 1.307607061 1  
1.665582987 1.428984305 1.127894254 1.017601248 0.970736772  
0.605287937 0.812309025 0.650516413 1 1.097763532 1.034438491  
0.206820362 1.060473646 1 1.266215746 1.046059919 1.062313814  
0.903673219 1 1.09866528 1.158453135 0.787452651 0.922713462 1  
1.430441748 1.210109028 0.956443492 0.827611923 1.081395653  
YIL003W YIL003W::DRE3::Protein required for cell viability 1  
1.064721132 0.951973473 0.95134439 1.103121187 1 0.94357122  
0.881095963 1.169417293 1.3420342 1 1.181381981 1.07844583  
0.983801594 1.212972165 1 1.195602918 0.742506892 1.032088025  
1.106027306 1 1.402424935 1.219679359 0.82304312 0.905958769 1  
1.45501847 1.06820144 1 1.198509419 1.66823641  
1.275045081 1.343089585 1.655087764 1 1.082084791 1.401549608  
1.128317938 1.347910116 0.769687429 1.167206744  
YIL017W YIL017W 1.045362635 1.021519763 0.841913354  
1.239785531 1.474028652 1.025534505 0.836342565 1.48051615  
1.504073627 1.034180899 1.208072394 1 1.618883132 2.162959677  
1.754951836 0.954871268 1.026795328 1.104800345 0.800829278  
0.883839967 1 1.146755948 1.492138332 1.501739236 1.321141726  
1.380074408 1 1.258242688 1.156590858 1.206960979 1.071591905  
0.804439434 1 1.243746553 0.973005405 1.069616939 0.837659868  
1.219855089 0.652339884  
YIL019W YIL019W::YIL019W::molecular\_function unknown 1 0.552134891  
0.563011844 0.633174138 0.71011425 1 0.49083587 0.512601462

|             |                                                    |             |             |             |             |   |             |
|-------------|----------------------------------------------------|-------------|-------------|-------------|-------------|---|-------------|
| 0.754202057 | 0.840343811                                        | 1           | 0.456090537 | 0.340301125 | 0.838771125 | 1 |             |
| 0.369393785 | 0.39739131                                         | 0.568897531 | 1           | 1.069350866 | 1.808916625 |   |             |
| 0.970853137 | 1                                                  | 0.722619786 | 0.579419393 | 0.567488945 | 0.797079277 |   |             |
| 0.812478731 | 1                                                  | 0.73334982  | 0.58222579  | 1.224779993 | 1.727698436 | 1 |             |
| 0.458352507 | 0.523733257                                        | 0.840432351 | 0.840867283 | 0.417081089 | 0.859862762 |   |             |
| YIL021W     | YIL021W::RPB3::45 kDa subunit of RNA polymerase II |             |             |             |             | 1 |             |
| 1.030421504 | 1.088330363                                        | 1.00627071  | 1.35240528  | 1           | 0.978848483 |   |             |
| 0.991948521 | 1.30245727                                         | 1.346925343 | 1           | 0.845440692 | 0.899623028 |   |             |
| 0.984075254 | 1.120851909                                        | 1           | 0.786230372 | 0.724725678 | 0.586439779 |   |             |
| 0.981472661 | 1                                                  | 1.218045837 | 1.113130583 | 1.152997931 | 1.292484416 | 1 |             |
| 1.121716095 | 1.2841758                                          | 1.03321493  | 0.909677499 | 0.890350433 | 1           |   |             |
| 0.922253635 | 1.094275304                                        | 0.876247009 | 0.737172399 | 1.167067825 | 1           |   |             |
| 1.035073875 | 0.924579518                                        | 1.149171715 | 0.916184194 | 1.111166903 |             |   |             |
| YIL023C     | YIL023C::YIL023C::molecular_function unknown       |             |             |             |             | 1 | 1.014520714 |
| 0.933029407 | 0.873584792                                        | 0.412425822 | 1           | 1.036094121 | 0.99790086  |   |             |
| 0.843974961 | 0.725779107                                        | 1           | 1.243130836 | 1.087332756 | 1.086143333 |   |             |
| 0.730684648 | 1                                                  | 0.805204687 | 0.851916612 | 1.102380873 | 0.974161174 | 1 |             |
| 1.090198099 | 1.256944486                                        | 0.9516285   | 0.863858426 | 1           | 1.048548953 |   |             |
| 1.015131598 | 1.219164196                                        | 1.345559152 | 1.096246552 | 1           | 0.736708739 |   |             |
| 0.508543599 | 0.640202411                                        | 0.683798547 | 0.46761287  | 1           | 0.481155655 |   |             |
| 0.870061383 | 0.417367313                                        | 0.790384473 | 0.822210945 |             |             |   |             |
| YIL025C     | YIL025C::YIL025C::molecular_function unknown       |             |             |             |             |   |             |
| 1.146789691 | 0.916879712                                        | 1.138540935 |             |             | 1.089133595 |   |             |
| 1.407533582 | 0.840325536                                        |             | 1.362547966 | 1.099404672 | 1           |   |             |
| 0.900180311 | 2.104741751                                        | 1.723014713 | 1.143016497 | 1           | 0.926386073 |   |             |
| 2.747982654 | 2.377130646                                        | 1.005027637 |             |             |             | 1 |             |
|             | 0.819784235                                        |             | 1           | 0.983649013 |             |   |             |
| 1.196102433 |                                                    |             |             |             |             |   |             |
| YIL027C     | YIL027C::KRE27::Killer toxin REsistant             |             |             |             |             | 1 | 1.187979553 |
| 1.492297688 | 0.940332698                                        | 1.826203224 | 1           | 1.120011029 | 0.942185866 |   |             |
| 1.726113071 | 1.335641336                                        | 1           | 1.236965577 | 1.35691225  | 1.479462332 |   |             |
| 1.225976206 | 0.625441144                                        | 0.434281762 | 0.399161117 | 0.441470992 | 1           |   |             |
| 1.541817937 | 2.184174259                                        | 1.408029335 | 0.997710758 | 1           | 1.003157211 |   |             |
| 1.01236476  | 0.609255014                                        | 0.679953982 | 0.945651947 | 1           | 1.270478973 |   |             |
| 2.427654231 | 1.302391792                                        | 1.317884242 | 1.879707561 | 1           | 1.108116022 |   |             |
| 1.555039471 | 1.163276809                                        | 1.644167293 | 1.187920222 | 1.422889    |             |   |             |
| YIL041W     | YIL041W::YIL041W::molecular_function unknown       |             |             |             |             | 1 | 0.923004299 |
| 0.906861345 | 0.739468505                                        | 0.886782451 | 1           | 0.888063577 | 0.981895988 |   |             |
| 0.969617178 | 0.985606861                                        | 1           | 0.896607948 | 0.879095146 | 1.087295276 |   |             |
| 0.873502688 | 1                                                  | 1.141616818 | 1.086151042 | 1.097809394 | 1.038373734 | 1 |             |
| 1.205805386 | 1.071687861                                        | 1.299070068 | 1.295460496 | 1           | 1.120359986 |   |             |
| 0.963616509 | 1.05144068                                         | 1.009877311 | 0.722904326 | 1           | 1.019705205 |   |             |
| 1.18947361  | 0.80448299                                         | 0.790850234 | 1.105444018 | 1           | 1.063325725 |   |             |
| 1.117849892 | 0.953339513                                        | 1.033924321 | 1.049279701 | 1.236381036 |             |   |             |
| YIL043C     | YIL043C::CBR1::cytochrome b reductase              |             |             |             |             | 1 | 1.100673849 |
| 1.004522105 | 0.873087571                                        | 1.170343088 | 1           | 0.974066139 | 0.942829134 |   |             |
| 1.094525712 | 1.162304291                                        | 1           | 0.992040482 | 0.935263319 | 1.064743231 |   |             |
| 1.191454671 | 1                                                  | 1.100372454 | 0.87176903  | 0.777503393 | 1.148382085 | 1 |             |
| 1.98124252  | 1.093071671                                        | 1.295057444 | 1.440359627 | 1           | 1.257898346 |   |             |
| 1.185455529 | 1.375668328                                        | 1.366282638 | 1.128372032 | 1           | 0.96767332  |   |             |
| 1.253563177 | 1.200940836                                        | 1.042432207 | 1.152005866 | 1           | 0.945061933 |   |             |
| 1.023943481 | 0.934398983                                        | 0.945968091 | 0.741373819 | 1.459665256 |             |   |             |
| YIL045W     | YIL045W::PIG2::Interacts with Gsy2p                |             |             |             |             | 1 | 1.009816346 |
| 0.805436015 | 0.962491807                                        | 1           | 1.042004887 | 0.870427867 | 0.970135836 |   |             |
| 0.830070759 | 1                                                  | 1.256817512 | 1.163240947 | 1.540331127 | 0.906405247 | 1 |             |
| 2.21189515  | 1.766291953                                        | 2.033287417 | 1.87369865  | 1           | 1.812501198 |   |             |
| 7.808022894 | 1.612094072                                        | 1.196606074 | 1           | 0.906001295 | 1.045038228 |   |             |

0.888850936 0.838932865 1.041880889 1 1.104509375 0.956450216  
 1.052353639 1.012515917 0.988246097 0.744260747 0.904478987  
 0.988471082 0.658216209 0.989376813 1.084022543  
 YOL137W YOL137W::YOL137W::not yet annotated 1 1.074475773 0.939023711  
 1.01059187 0.784553722 1 1.047910283 1.016202405 0.949765646  
 0.836297665 1 0.975865331 0.849546737 0.705495377 0.914459677 1  
 0.77700979 0.530152822 0.595586519 0.868091283 1 1.122795872  
 1.355909261 1.273989506 0.814507961 1 0.855814682 0.912998282  
 1.138073193 1.113009431 1.031533932 1 0.958087224 0.714906984  
 0.80481385 0.942081004 0.707103387 1 0.970227958 0.841268563  
 1.060542082 1.13168035 0.78684934 1.405376537  
 YOL139C YOL139C::CDC33::Required for START A of cell cycle and sporulation  
 1 1.317551997 1.253019585 1.279424134 1.787166191 1 1.22403947  
 1.062177468 1.503350955 1.453480793 1 0.970472921 1.034476207  
 0.995212815 1.297705467 1 0.734705125 1.006501695 0.629795275  
 1.025722042 1 0.811738745 0.484721826 0.685837355 0.680518205 1  
 1.129135087 1.221304381 1.124673863 1.183934265 1.441827012 1  
 0.948916993 1.19405615 0.697626496 0.651996512 1.082596476 1  
 1.080924348 1.082248049 0.928786942 1.761855929 1.152350841 1.323067897  
 YOL153C YOL153C::YOL153C::molecular\_function unknown 1 0.956751455  
 0.991839978 1.062681195 0.923336433 1 1.245622902 1.461003261  
 0.92564153 0.955093432 1 1.531502287 1.911175156 1.595357155  
 1.118330783 1 5.152366863 3.261897821 5.016721138 1.974114132 1  
 3.739233344 3.876969332 2.445762351 1.798933866 1 1.025271635  
 0.852330178 1.023787957 1.034074168 1.128509323 1 0.942842677  
 1.224122288 0.994399437 1.126689813 1.185566079 1 0.819589949  
 1.071840356 0.962242799 1.080138725 0.665926746 1.34145592  
 YOL153C YOL153C::YOL153C::molecular\_function unknown 1 1.153515755  
 1.187492015 1.108680631 1.098283148 1 1.06662273 1.187510566  
 1.161108123 1.297750694 1 0.869910978 0.993370735 0.953321968  
 1.256671293 1 0.595894528 0.605652118 0.882773789 0.830593875 1  
 1.016100625 1.445510121 1.141565508 0.700866308 1 1.199726287  
 1.33707587 1.269559715 1.266527125 1 1.196916526 1.099805755  
 1.746127914 1.246943307 0.935805837 1 1.165497436 1.132133136  
 1.027919723 0.926924975 1.160966183 1.100659341  
 YOL155C YOL155C::YOL155C::molecular\_function unknown 1 1.493772825  
 1.1049803 1.858019626 1.055562996 1 1.468831057 1.524510582  
 1.128953636 1.423544996 1 1.578854963 1.280482471 1.022712626  
 1.469514622 1 1.416592794 1.715884196 2.074851626 1  
 0.403637063 0.381584431 1 1.10341287 1.066301873  
 1.186442775 1.160008553 0.983589909 1 0.99882193 1.391599586  
 2.135705861 1.864351096 0.482792177 1 1.045203199 1.492443265  
 1.233153168 0.797097591 1.22769462 0.79331536  
 YOL157C YOL157C::YOL157C::not yet annotated 1 1.344728174 1.243739802  
 1.41013392 1.32220355 1 1.456393968 1.202698237 1.347321472  
 1.395412057 1 1.191716266 1.473626315 1.226440748 1.268006629 1  
 0.619936277 0.987580972 0.394652597  
 0.990204106 0.953415708 1.377131422 1.298440601 1.392996403 1  
 0.617476283 0.83103938 0.562122698 0.693824472 0.792000446 1  
 0.759976328 0.832390908 0.969635724 1.037188091 0.847084779 0.961435195  
 YOL159C YOL159C::YOL159C::molecular\_function unknown 1 1.390143199  
 1.679526173 1.059197431 2.04679994 1 1.121584943 1.056373999  
 1.677054495 1.542355526 1 1.258411202 1.348980842 2.014703597  
 1.22653058 1 1.716892378 1.718621272 1.80648464 2.487752569 1  
 1.394927883 1.799458785 1.976448055 1.653200059 1 1.057633157  
 1.247217534 0.891935629 0.907712836 1.13313965 1 1.171660589



|         |                                                                                                                                                                                                                                                                 |             |             |             |             |             |             |
|---------|-----------------------------------------------------------------------------------------------------------------------------------------------------------------------------------------------------------------------------------------------------------------|-------------|-------------|-------------|-------------|-------------|-------------|
|         | 2.358312463                                                                                                                                                                                                                                                     | 1.588643077 | 1.518080209 | 2.213676854 | 1           | 1.256764477 |             |
|         | 1.581752487                                                                                                                                                                                                                                                     | 1.187050936 | 1.742417941 | 1.172487516 | 7.478704905 |             |             |
| YOL161C | YOL161C::YOL161C::molecular_function unknown                                                                                                                                                                                                                    |             |             |             |             | 1           | 1.823102755 |
|         | 1.969091181                                                                                                                                                                                                                                                     | 1.419699081 | 2.084513135 | 1           | 1.565894004 | 1.414094751 |             |
|         | 2.102892783                                                                                                                                                                                                                                                     | 1.94204586  | 1           | 1.666267381 | 1.730850237 | 2.681749219 |             |
|         | 1.619390882                                                                                                                                                                                                                                                     | 1           | 0.952166794 | 0.394071014 | 0.731457667 | 1           |             |
|         | 1.641156588                                                                                                                                                                                                                                                     | 2.111948361 | 2.00354771  | 1.49326464  | 1           | 1.129490318 |             |
|         | 1.346310854                                                                                                                                                                                                                                                     | 1.11519888  | 1.077236539 | 0.871560492 |             | 0.703157675 |             |
|         | 1.307085925                                                                                                                                                                                                                                                     | 1.019035418 | 0.960657325 | 1.532480772 | 1           | 1.090594358 |             |
|         | 1.418972712                                                                                                                                                                                                                                                     | 1.296081427 | 1.373837751 | 1.008815677 | 3.069937781 |             |             |
| YBR295W | YBR295W::PCA1::Putative P-type Cu(2+)-transporting ATPase                                                                                                                                                                                                       |             |             |             |             | 1           |             |
|         | 1.286709219                                                                                                                                                                                                                                                     | 0.918547836 | 2.178513619 | 0.697583779 | 1           | 1.672670161 |             |
|         | 1.604257014                                                                                                                                                                                                                                                     | 1.290746904 | 1.424782592 | 1           | 1.652488739 | 1.961342028 |             |
|         | 1.055583297                                                                                                                                                                                                                                                     | 1.535249228 | 1           | 0.500241131 | 1.861743713 | 1.261697018 |             |
|         | 0.439407059                                                                                                                                                                                                                                                     | 1           | 0.514671306 | 0.185661541 | 0.265109953 | 1           |             |
|         | 1.235323424                                                                                                                                                                                                                                                     | 1.315025313 | 1.276385123 | 1.865382109 | 1.168295595 | 1           |             |
|         | 1.247669152                                                                                                                                                                                                                                                     | 0.717315024 | 0.963631528 | 1.060440197 | 0.428398091 | 1           |             |
|         | 1.036415145                                                                                                                                                                                                                                                     | 0.733079993 | 0.861067867 | 0.496743946 | 0.799190764 | 0.402787047 |             |
| YOL163W | YOL163W::YOL163W::molecular_function unknown                                                                                                                                                                                                                    |             |             |             |             | 1           | 1.8498344   |
|         | 1                                                                                                                                                                                                                                                               |             | 2.138046383 | 1.674909471 | 1           | 1.698825624 |             |
|         | 2.058174661                                                                                                                                                                                                                                                     | 2.419216027 | 1.850506734 | 1           | 0.898133967 | 2.371208996 |             |
|         | 1.447025122                                                                                                                                                                                                                                                     | 0.266594245 | 0.339938565 | 0.365885667 |             |             |             |
|         | 0.749808483                                                                                                                                                                                                                                                     |             |             | 1           |             |             | 1           |
|         | 0.648069165                                                                                                                                                                                                                                                     |             |             |             |             |             |             |
| YBR297W | "YBR297W::MAL33::Part of complex locus MAL3; nonfunctional in S288C, shows homology to both functional & nonfunctional MAL-activator proteins in other Sc strains & to other nonfunctional MAL-activator sequences from S288C (i.e. MAL33, YPR196W, & YFL052W)" |             |             |             |             |             |             |
|         | 1.637281425                                                                                                                                                                                                                                                     | 1           | 1.679225146 | 1.54196179  | 1.414638969 | 1.458923134 | 1           |
|         | 1.165010963                                                                                                                                                                                                                                                     | 1.309762778 | 1.372009892 | 1.339621252 | 1           | 0.754496697 |             |
|         | 0.65781066                                                                                                                                                                                                                                                      | 0.681055832 | 1           | 0.934797941 | 1.177956113 | 1.060425698 |             |
|         | 1.15924493                                                                                                                                                                                                                                                      | 1           | 0.735099711 |             | 0.802141328 | 0.823491159 | 1           |
|         | 0.725943228                                                                                                                                                                                                                                                     | 0.771555005 |             | 1.355011769 | 1.824592282 | 1           |             |
|         | 1.024139018                                                                                                                                                                                                                                                     | 1.359650308 | 1.258941932 | 2.052387128 | 1.036738829 |             |             |
| YOR011W | YOR011W::AUS1::ABC(ATP-binding cassette) protein involved in Uptake of Sterols                                                                                                                                                                                  |             |             |             |             |             |             |
|         | 1                                                                                                                                                                                                                                                               | 1.727714801 | 1.544951306 |             | 1           | 1.773139753 |             |
|         | 1.654320208                                                                                                                                                                                                                                                     | 1.128837123 | 1           | 1.711760283 | 1.47537276  | 1.740730711 |             |
|         | 1.080727487                                                                                                                                                                                                                                                     | 1           | 1.63012814  | 0.87078333  |             | 1           | 1.42144858  |
|         | 2.032432987                                                                                                                                                                                                                                                     | 1.462406586 | 0.994028187 | 1           | 1.135687219 | 0.997368654 |             |
|         | 0.926845468                                                                                                                                                                                                                                                     | 1.041355978 | 1.005988815 | 1           | 0.792689383 | 0.783243491 |             |
|         | 0.635240126                                                                                                                                                                                                                                                     | 0.903792229 | 1.159027024 | 1           | 1.133829502 | 1.026204864 |             |
|         | 0.750033173                                                                                                                                                                                                                                                     | 1.383821674 | 1.727671758 | 1.770511793 |             |             |             |
| YBR299W | YBR299W::MAL32::Part of the complex locus MAL3; functional in S288C; highly homologous to MAL62 from S. carlsbergensis strain CB11                                                                                                                              |             |             |             |             |             |             |
|         | 1.568693965                                                                                                                                                                                                                                                     | 1           |             | 1.473717133 |             | 1           |             |
|         |                                                                                                                                                                                                                                                                 | 0.751087795 |             |             |             |             |             |
|         |                                                                                                                                                                                                                                                                 | 1.173161587 | 0.888934107 | 1           | 0.808958381 | 0.670088765 |             |
|         | 0.608096509                                                                                                                                                                                                                                                     | 0.506875426 |             | 1.123776989 |             | 1.034081101 |             |
|         | 0.774051619                                                                                                                                                                                                                                                     |             |             |             |             |             |             |
| YOR013W | YOR013W::YOR013W::molecular_function unknown                                                                                                                                                                                                                    |             |             |             |             | 1           | 1.760210384 |
|         | 1.352861357                                                                                                                                                                                                                                                     | 1.548244779 | 1.959002841 | 1           | 1.402658    | 1.360965119 |             |
|         | 1.604795407                                                                                                                                                                                                                                                     | 1.443117986 | 1           | 1.443437073 | 1.4121484   | 1.571001322 |             |
|         | 1.311588252                                                                                                                                                                                                                                                     | 1           | 1.284428057 | 3.170686496 | 3.101634848 | 1.811856908 |             |
|         | 0.558800148                                                                                                                                                                                                                                                     | 0.547927321 | 0.495520689 | 0.502255921 | 1           | 1.126145328 |             |
|         | 1.161384332                                                                                                                                                                                                                                                     | 1.110534428 | 1.525026768 | 1.207404325 | 1           | 0.897006939 |             |
|         | 0.602496724                                                                                                                                                                                                                                                     | 0.626873155 | 0.853251373 | 0.623327405 | 1           | 0.599396026 |             |
|         | 0.402867625                                                                                                                                                                                                                                                     | 0.650730335 | 0.539778456 | 0.736187841 | 0.691742979 |             |             |

YBR301W YBR301W::DAN3::delayed anaerobic gene 1 1.568978856  
1.6906979 1.302348342 1.919693441 1 1.365982418 1.313698469  
1.600840107 1.682229704 1 1.429397318 1.596037271 2.236631204  
1.557229957 1 0.783399474 0.491076411 0.893160115 1  
0.941747005 1.563515615 1.36449518 0.993151154 1 1.054471351  
1.258458188 1.098985548 1.10218582 1.053980392 1 0.773231698  
1.178678421 1.31869117 0.916459928 1.343032361 1 1.08151673  
1.663392428 1.218222242 1.513052748 1.300291907 1.47542639  
YCL013W YCL013W 1 1.269027558 1.386987101 1.583429326 1.520154375 1  
1.4249189 1.264171255 1.309447294 1.265148247 1 1.257418135  
1.21447664 0.747548721 1.060085578 0.911292385  
1.017721273 1 0.475397958 1 1.090966913  
0.816934304 1.024726133 1.352691468 0.748156113 1 0.872228763  
0.581676878 0.765126715 0.777704732 0.519090628 1 0.845090451  
0.744741436 1.027972217 0.821309652 0.624319912  
YCL016C YCL016C::DCC1::Defective in sister Chromatid Cohesion  
0.513397664 1  
1.128389508 1.012463258 1.086741784 1 1.005982472  
1.066322653 1.13270613 1.080366682 0.885158986 0.89306598  
1.13757584 0.713709869 1.101137532 1.173336189  
YCL018w YCL018w::LEU2::leucine biosynthesis 1 1.498664283 1.322954958  
1.377715017 1.00812575 1 1.504492963 1.667830469 1.076459394  
1.223925172 1 1.917428561 2.083310004 1.63952535 1.127010811 1  
1.248848304 1.753263946 1.582997296 1 1.405885799  
1 1.321220145 1.778622185 4.425133312 1.17136565 0.921709703 1  
0.707899977 0.898772483 1.034349455  
1.177714305  
YCL020W YCL020W 1 1.205880298 1.172082486 1.726210041 1.346496377 1  
1.48748269 1.318382998 1.170910418 1.286901506 1 1.719971413  
1.776832243 1.112969252 1.652492078 1 0.954158251 1.298389963  
0.816308579 1.200524349 1 0.532775721 0.615424458 0.343277884  
0.598316477 1 0.864667687 1.127731421 1.00060418 0.945645048  
0.798970967 1 1.376539138 1.569145676 2.732561892 3.595283344  
1.884909505 1 1.190957131 1.62933582 1.781250055 1.216396139  
1.081392384 1.377356512  
YCL022C YCL022C::YCL022C::molecular\_function unknown 1 1.042481687  
1.490265648 1.766285173 1.70621259 1 1.436163969 1.46296057  
1.453909389 1 1.132895527 1.333361878 1.716233802 1  
0.646604948 0.627670288 1 0.486661207 1  
0.770129695 0.932919577 1.036258959 0.856749564 1.021400723 1  
0.877822153 0.916262479 1.125425152 1.049289977 1.208784052 1  
0.841842026 1.07947637 1.246353586 1.119668744 1.150569945  
YCL024W YCL024W::KCC4::involved in septin organization 1 0.9103376  
1.07171906 1.509827322 0.82141665 1 1.436383499 1.590157884  
0.975052161 0.924580881 1 1.050296307 1.377308778 1.103732787  
1.224294877 1 1.382014116 1.232282637 1.805578059 0.721406482 1  
1.391884322 1.262873395 1 0.912278997 1.146077832  
1.031660981 1.0706736 1.034630768 0.730215629 1.28949779  
0.909790851 1 0.849695774 0.863611611 0.743253609 1.123145411  
0.614688067  
YIL047C YIL047C::SYG1::Protein for which truncation and overexpression can  
suppress lethality of G-alpha protein deficiency 1 1.087605274  
0.652353272 1.111506022 1 0.92234696 0.871728579 1  
0.854800929 0.872835764 0.564370179 1.021167617  
1 0.982040605 0.788579658 1.154167232  
1.406066001 0.772802472 1 0.649367048 0.554755543 0.559539723

1

0.735705093 0.525833488 1 0.804391652 0.697791829 0.824568934  
 0.724046969 0.566631613 0.645334878  
 YIL049W "YIL049W::DFG10::Protein required for filamentous growth, cell  
 polarity, and cellular elongation" 1 0.863421879 0.844260817 0.632914809  
 0.724302581 1 0.688917312 0.666602912 0.823809025 0.663601642 1  
 0.904540245 0.856421879 1.178812648 0.587598862 1 1.044037214  
 1.351100633 1.626086677 1.269443368 1 1.018933076 1.853085818  
 2.187070464 1.728110325 1 1.374572071 1.401086193 1.222421861  
 1.110041539 1.015766918 1 0.875853132 1.123620433 1.003131064  
 0.975556794 1.574432443 1 0.990888761 1.014200287 1.10255444  
 1.254963035 1.209278332 1.202231775  
 YIL051C YIL051C::MMF1::Maintenance of Mitochondrial Function 1  
 1.182737635 1.346808898 0.804099647 1.456054317 1 0.905068236  
 1.201138245 1.395904315 1.37253641 1 1.105170486 1.316444907  
 2.315889282 0.975778617 1 1.062727994 1.501542305 1.505533926 1  
 1.394247933 2.371634939 2.31366289 1.420353259 1 1.081110954  
 1.130705492 1.163268202 0.911364928 0.674264244 1 1.299144525  
 2.474141347 1.684832028 0.912353639 1.551447434 1 0.783302424  
 1.31555972 1.071136197 1.074216055 0.758860352 1.384361518  
 YIL065C YIL065C::FIS1::Involved in mitochondrial division 1  
 1.18929324 1.368452359 1.149300392 1.292425504 1 1.163018054  
 1.43329422 1.410417342 1 1.115788766 1.292371196 1.846552866  
 1.351799132 0.830599448  
 1 0.911716014 1.337436703 1.690720251 0.988175712 1.043365159 1  
 1.274539312 2.24586768 2.052814437 1.820697836 1.359926937 1  
 1.033387022 1.221305969 1.19357866 1.143353498 1.198036469 0.956181415  
 YIL067C YIL067C::YIL067C::molecular\_function\_unknown 1 0.725474001  
 0.635675982 0.779817521 0.505559145 1 0.786152567 0.768119115  
 0.647350536 0.68220132 1 1.062103573 0.777167426 0.569451631  
 0.731712692 1 0.65496067 0.670096742 0.810045489 1  
 2.079844548 1.67604534 1.328426743 1.415109314 1.07506783  
 1.217690481 1.549840124 1.139227079 0.869796628 1 1.220645592  
 1.084103778 1.346831256 0.998872639 0.74128711 1 1.08889793  
 1.209499144 0.987999326 0.7536817 0.77765984 0.835345293  
 YIL069C YIL069C::RPS24B::Homology to rat S24 1 1.049504176  
 1.113273752 0.716146353 1.126726412 1 0.832580818 0.908716043  
 1.100013952 1.434387547 1 0.752439151 0.726341109 0.671907038  
 0.790138896 1 1.075195903 0.421889341 0.266340985 0.624905949 1  
 1.440112362 0.837841053 0.523710332 0.835436096 1 0.944934859  
 0.99011707 0.770606575 1.083659751 1.006310948 1 0.914151001  
 1.114409534 0.706614293 0.619681563 1.232987244 1 1.300138318  
 1.347242151 0.969788476 1.784100492 1.213023742 1.090151884  
 YIL073C "YIL073C::SPO22::sporulation-defective; SPO22 contains phospholipase  
 A2 signature sequence (positions 135-143, found by Emotif search). The gene is  
 specifically induced early in meiosis (Primig et al. (2000) Nat Genet 26:415-  
 423)" 1 1.648982026 1.12224529 1.119491258 1.055866336 1 1.250336404  
 1.002161863 1.292413384 1.22986851 1 1.227805002 1.210490242  
 0.925600056 0.897434564  
 1 1.115270269 1.049510277 0.947479919 1.099359915 1.109452161 1  
 0.867953699 1.078342664 0.64543585 0.853316601 0.997513625 1  
 1.102482351 0.936553414 0.932788154 1.054841413 0.986980131 1.707466842  
 YIL075C YIL075C::RPN2::involved in tRNA processing and degradation of  
 ubiquitinated proteins 1 0.749962205 0.750166406 1.114700959 0.65804753 1  
 1.02263772 1.153213008 0.770245007 0.693176147 1 1.008190706  
 1.066026049 0.812035118 0.802191932 1 1.326754547 1.40056275  
 1.615507848 0.844357016 1 1.003699432 0.761696195 0.725933248  
 0.882908621 1 0.993520697 1.197293873 1.263955216 0.954135133

|         |                                                                                                                                                                                                            |             |             |             |             |             |   |
|---------|------------------------------------------------------------------------------------------------------------------------------------------------------------------------------------------------------------|-------------|-------------|-------------|-------------|-------------|---|
|         | 0.842532411                                                                                                                                                                                                | 1           | 1.106147379 | 1.033628849 | 1.013860534 | 0.734131091 |   |
|         | 0.392723988                                                                                                                                                                                                | 1           | 1.097403135 | 1.148378122 | 0.98713867  | 0.603169211 |   |
|         | 0.772409048                                                                                                                                                                                                | 1.04199261  |             |             |             |             |   |
| YIL090W | YIL090W::YIL090W::molecular_function                                                                                                                                                                       | unknown     | 1           | 1.477504383 |             |             |   |
|         | 0.863727659                                                                                                                                                                                                | 1.358195167 | 0.765544191 | 1           | 1.306719253 | 1.297546414 |   |
|         | 0.846317528                                                                                                                                                                                                | 0.933651185 | 1           | 1.302402063 | 0.779385682 | 0.552641236 |   |
|         | 0.953827978                                                                                                                                                                                                | 2.103418151 |             | 1.610631259 |             | 0.759036896 |   |
|         |                                                                                                                                                                                                            | 1           | 0.791310164 | 0.515358239 | 0.904452976 | 1.172557373 |   |
|         | 0.859832982                                                                                                                                                                                                | 1           | 0.614270418 | 0.410643894 | 0.503310129 | 0.477636843 |   |
|         | 0.295444627                                                                                                                                                                                                | 1           | 0.598994378 | 0.414304365 | 0.702380596 | 0.530383097 |   |
|         | 0.736399802                                                                                                                                                                                                |             |             |             |             |             |   |
| YOR015W | YOR015W::YOR015W::molecular_function                                                                                                                                                                       | unknown     | 1           | 1.470512558 |             |             |   |
|         | 1.760889879                                                                                                                                                                                                | 1.09498651  | 1.905851238 | 1           | 1.262317031 | 1.052986992 |   |
|         | 1.982401601                                                                                                                                                                                                | 1.570985465 | 1           | 1.280084491 | 1.314620853 | 2.13728989  |   |
|         | 1.223979335                                                                                                                                                                                                | 1           | 1.435382857 | 1.296132127 | 1.324708651 | 1.501308312 | 1 |
|         | 1.353588169                                                                                                                                                                                                | 2.50480569  | 1.768026515 | 1.251122997 | 1           | 0.839991482 |   |
|         | 0.77051184                                                                                                                                                                                                 | 0.52371463  | 0.68698986  | 0.749776655 | 1           | 1.044866893 |   |
|         | 1.20021653                                                                                                                                                                                                 | 0.85342482  | 0.727913236 | 1.470255977 | 1           | 0.946398196 |   |
|         | 1.449301849                                                                                                                                                                                                | 1.097184869 | 2.00541371  | 1.295874826 | 1.215366122 |             |   |
| YOR017W | YOR017W::PET127::May be component of mitochondrial translation system with role in promoting accuracy of translational initiation or may play a role in RNA surveillance or RNA processing in mitochondria |             | 1           | 0.686262986 |             |             |   |
|         | 0.909572076                                                                                                                                                                                                | 1.120754068 | 0.724310497 | 1           | 0.935959962 | 1.132423169 |   |
|         | 0.721413987                                                                                                                                                                                                | 1           | 0.806538732 | 0.764226029 | 0.571985165 | 0.890454922 | 1 |
|         | 0.80304422                                                                                                                                                                                                 | 0.44262848  | 0.686494442 | 0.713343454 | 1           | 1.425322079 |   |
|         | 1.569249401                                                                                                                                                                                                | 1.166715759 | 1.093887533 | 1           | 1.05507557  | 0.918966009 |   |
|         | 1.188325308                                                                                                                                                                                                | 1.190103535 | 1.182525485 | 1           | 0.900679633 | 0.525185389 |   |
|         | 0.556509798                                                                                                                                                                                                | 0.704501158 | 0.598803225 | 1           | 0.78240746  | 0.726168445 |   |
|         | 0.896238248                                                                                                                                                                                                | 0.89896307  | 0.731070637 | 1.20660989  |             |             |   |
| YOR019W | YOR019W::YOR019W::molecular_function                                                                                                                                                                       | unknown     | 1           | 1.67020426  |             |             |   |
|         | 1.62913543                                                                                                                                                                                                 | 1.73209302  | 1.809805012 | 1           | 1.486854562 | 1.473649141 |   |
|         | 1.779846521                                                                                                                                                                                                | 1.637868503 | 1           | 1.268231992 | 1.694202823 | 1.844823958 |   |
|         | 1.524586325                                                                                                                                                                                                | 1           | 1.492513981 | 2.129755043 | 1.222131515 | 1           |   |
|         | 0.630511925                                                                                                                                                                                                | 0.714882049 |             | 1           | 1.266728019 | 1.218859301 |   |
|         | 1.225804413                                                                                                                                                                                                | 1.084803747 | 1.315987404 | 1           | 0.756658573 | 1.026662618 |   |
|         | 1.008869225                                                                                                                                                                                                | 0.823073931 | 1.113011123 | 1           | 0.76737316  | 1.013199885 |   |
|         | 0.826636038                                                                                                                                                                                                | 1.059418354 | 0.863576213 | 1.006092019 |             |             |   |
| YOR021C | YOR021C::YOR021C::molecular_function                                                                                                                                                                       | unknown     | 1           | 1.119326894 |             |             |   |
|         | 1.075176986                                                                                                                                                                                                | 0.914351339 | 1.461766964 | 1           | 0.937341779 | 0.779208596 |   |
|         | 1.224200223                                                                                                                                                                                                | 1.203996988 | 1           | 0.777190224 | 0.802031757 | 0.614302561 |   |
|         | 1.086470556                                                                                                                                                                                                | 1           | 0.589959097 | 0.341510467 | 0.199997556 | 0.745648704 | 1 |
|         | 0.959481493                                                                                                                                                                                                | 0.343107264 | 0.481852808 | 0.801410871 | 1           | 1.182491461 |   |
|         | 1.05726432                                                                                                                                                                                                 | 1.04334445  | 1.094794114 | 1.220066002 | 1           | 1.040663535 |   |
|         | 1.275986389                                                                                                                                                                                                | 0.781001342 | 0.88616103  | 1.737445703 | 1           | 0.905563054 |   |
|         | 1.068600148                                                                                                                                                                                                | 0.814666151 | 1.662621898 | 0.748900258 | 1.088400659 |             |   |
| YOR035C | YOR035C::SHE4::Required for mother cell-specific HO expression                                                                                                                                             |             | 1           |             |             |             | 1 |
|         | 1.231192046                                                                                                                                                                                                | 1.094874634 | 2.032700847 | 1.132292444 | 1           | 1.443758129 |   |
|         | 1.468771995                                                                                                                                                                                                | 1.534254183 | 1.250447681 | 1           | 1.299996856 | 1.618055685 |   |
|         | 0.990023381                                                                                                                                                                                                | 1.372818891 | 1           | 1.319760656 | 1.873289157 | 2.328833512 | 1 |
|         |                                                                                                                                                                                                            |             | 1           | 1.068598742 | 1.243879693 | 1.374729281 |   |
|         | 1.5026069                                                                                                                                                                                                  | 1.432195145 | 1           | 1.174917407 | 0.552827238 | 0.86557637  |   |
|         | 1.13700905                                                                                                                                                                                                 | 0.474342625 | 1           | 0.804133305 | 0.578651713 | 0.796710727 |   |
|         | 0.412064813                                                                                                                                                                                                | 1.084313559 | 0.850230918 |             |             |             |   |
| YOR035C | YOR035C::SHE4::Required for mother cell-specific HO expression                                                                                                                                             |             | 1           |             |             |             | 1 |
|         | 0.756884429                                                                                                                                                                                                | 0.771508899 | 0.950468653 | 0.649952524 | 1           | 0.9652758   |   |
|         | 1.037844571                                                                                                                                                                                                | 0.912745027 | 0.56725519  | 1           | 1.066963553 | 1.126894052 |   |
|         | 0.48583055                                                                                                                                                                                                 | 0.918748648 | 1           | 1.097888751 | 0.939272168 | 1.160750183 |   |

|         |                                                                                                                                                                                                                              |             |             |             |             |             |             |
|---------|------------------------------------------------------------------------------------------------------------------------------------------------------------------------------------------------------------------------------|-------------|-------------|-------------|-------------|-------------|-------------|
|         | 0.733426803                                                                                                                                                                                                                  | 1           | 1.603195438 | 1.353365452 |             | 1           | 1.19711255  |
|         | 1.207630678                                                                                                                                                                                                                  | 1.361870655 | 1.509850254 | 1.302406453 | 1           | 1.27355187  |             |
|         | 0.952217846                                                                                                                                                                                                                  | 1.044655071 | 1.174561326 | 0.763543243 | 1           | 0.783345408 |             |
|         | 0.749661594                                                                                                                                                                                                                  | 0.751885871 | 0.687322833 | 0.682468753 | 0.896639019 |             |             |
| YOR037W | YOR037W::CYC2::Involved in import of cytochrome c into mitochondria                                                                                                                                                          |             |             |             |             |             |             |
|         | 1                                                                                                                                                                                                                            | 1.047091769 | 1.250033193 | 1.154735131 | 1.202935643 | 1           | 1.1505608   |
|         | 1.191932154                                                                                                                                                                                                                  |             | 1.364669114 | 1           | 0.922897707 | 1.270641119 | 1.225775289 |
|         | 1.33499241                                                                                                                                                                                                                   | 1           | 1.487121731 |             | 1.108024616 | 1.193806193 |             |
|         | 0.840900659                                                                                                                                                                                                                  |             | 1           | 1.135425954 | 1.217627106 | 1.323008369 |             |
|         | 0.993275105                                                                                                                                                                                                                  | 1.291604806 | 1           | 1.171824308 |             | 0.995470959 | 0.958504472 |
|         | 0.93583969                                                                                                                                                                                                                   | 1           | 1.131297216 | 1.090254993 | 0.916425974 | 1.085735556 |             |
|         | 0.988598479                                                                                                                                                                                                                  | 1.115545019 |             |             |             |             |             |
| YOR039W | "YOR039W::CKB2::Casein kinase II, beta' subunit" 1                                                                                                                                                                           |             |             |             |             |             |             |
|         | 1.133091057                                                                                                                                                                                                                  | 1.066986232 | 1.077916349 | 1.20493506  | 1           | 1.00818025  |             |
|         | 1.026811357                                                                                                                                                                                                                  | 1.079843666 | 1.138921589 | 1           | 0.958703068 | 1.00863816  |             |
|         | 0.730717183                                                                                                                                                                                                                  | 1.136600374 | 1           | 1.189270362 | 0.919253048 | 0.796374785 |             |
|         | 1.170144081                                                                                                                                                                                                                  | 1           | 1.758606274 | 0.807194715 | 1.121633721 | 1.571857578 | 1           |
|         | 0.901211665                                                                                                                                                                                                                  | 1.132993678 | 1.162210175 | 1.134857793 | 1.123227794 | 1           |             |
|         | 0.886618359                                                                                                                                                                                                                  | 1.164513944 | 0.590965169 | 0.652156133 | 0.74238497  | 1           |             |
|         | 1.292314005                                                                                                                                                                                                                  | 1.07647433  | 0.921887268 | 1.32141043  | 1.00026093  | 0.918529598 |             |
| YCL038C | YCL038C::AUT4::Autophagy gene essential for breakdown of autophagic vesicles in the vacuole 1                                                                                                                                |             |             |             |             |             |             |
|         | 1.501573099                                                                                                                                                                                                                  | 1.545138941 | 1.156114421 |             | 1           | 1.541828981 | 1.441435898 |
|         | 1.360551232                                                                                                                                                                                                                  | 1.306759714 | 1           | 1.688298033 | 1.486914137 | 1.583045921 |             |
|         | 0.76028084                                                                                                                                                                                                                   | 1           | 0.637566563 |             | 1           | 1.087993671 |             |
|         | 1.3315955                                                                                                                                                                                                                    | 1.697647515 | 1.667459175 | 0.919086802 | 1           | 0.901115584 |             |
|         | 1.041565524                                                                                                                                                                                                                  | 1.972225622 | 1.399078916 | 1.073708962 | 1           | 1.157740461 |             |
|         | 1.096090812                                                                                                                                                                                                                  | 0.96784027  |             | 0.957774546 | 0.899265805 |             |             |
| YOR041C | YOR041C::molecular_function unknown 1 0.748688267                                                                                                                                                                            |             |             |             |             |             |             |
|         | 1.174518635                                                                                                                                                                                                                  | 0.824406073 | 0.740472858 | 1           | 1.093253936 |             |             |
|         | 0.767365648                                                                                                                                                                                                                  | 1           | 1.360612252 | 0.997406253 | 0.919665673 | 1           |             |
|         | 1.177192808                                                                                                                                                                                                                  | 1.152571549 | 1.335111196 | 1.439490298 | 1           | 1.60127944  |             |
|         | 1.375340612                                                                                                                                                                                                                  | 2.107243448 | 2.379010304 |             | 0.737254638 | 0.859654548 |             |
|         | 1.222494499                                                                                                                                                                                                                  | 0.800852406 | 1.038206157 | 1           | 1.010916738 | 0.850819824 |             |
|         | 1.372865611                                                                                                                                                                                                                  | 1.536500754 | 0.707917894 | 1           | 0.775801312 | 0.584832481 |             |
|         | 0.967173365                                                                                                                                                                                                                  | 0.556666242 | 0.831932574 | 0.872121497 |             |             |             |
| YCL040w | YCL040w::GLK1::Glucose phosphorylation 1 1.048792614                                                                                                                                                                         |             |             |             |             |             |             |
|         | 1.228001295                                                                                                                                                                                                                  | 1.21217189  | 0.545354394 | 1           | 1.667960256 | 1.962572652 |             |
|         | 0.836112687                                                                                                                                                                                                                  | 0.821968468 | 1           | 1.458895935 | 2.239534736 | 2.982051567 |             |
|         | 0.844071973                                                                                                                                                                                                                  | 1           | 5.112050985 | 5.645534049 | 6.792163923 | 4.739694229 | 1           |
|         | 2.812778429                                                                                                                                                                                                                  | 1.649531318 | 1.932582954 | 1.909138786 | 1           | 1.23015442  |             |
|         | 1.969728674                                                                                                                                                                                                                  | 2.861744759 | 1.240246984 | 0.99861695  | 1           | 1.450467004 |             |
|         | 1.715546274                                                                                                                                                                                                                  | 3.7381727   | 2.645159856 | 1.109285495 | 1           | 2.362982511 |             |
|         | 1.955380227                                                                                                                                                                                                                  | 1.867580367 | 0.859197132 | 3.288181988 | 0.916778372 |             |             |
| YOR043W | "YOR043W::WHI2::Protein involved in growth regulation. Whi2 and its binding partner, Psr1-phosphatase, are required for a full activation of the general stress response, possibly through the dephosphorylation of Msn2." 1 |             |             |             |             |             |             |
|         | 0.768026774                                                                                                                                                                                                                  | 0.742708693 | 0.770299249 | 0.648636504 | 1           | 0.815619162 |             |
|         | 0.873916349                                                                                                                                                                                                                  | 0.687805614 | 0.691275034 | 1           | 1.037793449 | 0.943458018 |             |
|         | 0.782356959                                                                                                                                                                                                                  | 0.852200989 | 1           | 1.224453021 | 1.116732453 | 1.180370851 |             |
|         | 1.153224456                                                                                                                                                                                                                  | 1           | 0.833174389 | 0.752975703 | 1.012081361 | 0.977811046 | 1           |
|         | 1.183709681                                                                                                                                                                                                                  | 1.024129366 | 1.40925101  | 1.27532288  | 1.267512677 | 1           |             |
|         | 0.821617888                                                                                                                                                                                                                  | 0.794764951 | 0.914034645 | 0.757324333 | 0.823548106 | 1           |             |
|         | 0.93611453                                                                                                                                                                                                                   | 0.741908335 | 1.066894511 | 1.128481112 | 0.927001464 | 1.010470134 |             |
| YCL042W | YCL042W::molecular_function unknown 1 1.539602631                                                                                                                                                                            |             |             |             |             |             |             |
|         | 1.26178042                                                                                                                                                                                                                   | 2.107537818 | 0.717078627 | 1           | 2.429847372 | 2.712297604 |             |
|         | 1.102870398                                                                                                                                                                                                                  | 1.063410742 | 1           | 1.902244974 | 2.866221664 | 2.222025378 |             |

|             |                                                                                                                                                                             |             |             |             |             |
|-------------|-----------------------------------------------------------------------------------------------------------------------------------------------------------------------------|-------------|-------------|-------------|-------------|
| 1.283886692 | 2.993182731                                                                                                                                                                 | 4.330515177 | 5.299913083 | 1.73425209  |             |
| 1.250315359 |                                                                                                                                                                             | 0.981484476 | 1.680652203 | 1.718564501 |             |
| 0.426764921 | 1                                                                                                                                                                           | 1.707924058 | 3.077337211 | 4.739895597 | 4.254424908 |
| 1.453644932 |                                                                                                                                                                             | 1.029466077 | 1.448022325 | 1.46185273  | 0.445490617 |
| 0.784559128 |                                                                                                                                                                             |             |             |             |             |
| YOR045W     | YOR045W::TOM6::involved in supporting the cooperativity between receptors and the general insertion pore and facilitating the release of preproteins from import components |             |             |             |             |
|             | 1                                                                                                                                                                           | 1.76703992  | 2.299789195 | 1.495773752 |             |
| 2.637174825 | 1                                                                                                                                                                           | 1.461665452 | 1.447133477 | 2.201622831 | 1           |
| 1.57292902  | 1.344966862                                                                                                                                                                 | 1.994825873 | 1.473322223 | 1           | 0.792119527 |
| 0.500087077 | 0.45311348                                                                                                                                                                  | 1.533338966 | 1           | 1.498266213 | 1.560963083 |
| 1.839734931 | 1.302889702                                                                                                                                                                 | 1           | 1.300506175 | 1.392591787 | 1.176971251 |
| 1.620926515 | 1.202223298                                                                                                                                                                 | 1           | 0.918147932 | 1.60315753  | 1.188726052 |
| 0.776450408 | 1.26956498                                                                                                                                                                  | 1           | 0.969972858 | 1.043850192 | 0.862442364 |
| 1.524296297 | 1.204891068                                                                                                                                                                 | 1.235505476 |             |             |             |
| YCL044C     | YCL044C::YCL044C::molecular_function unknown                                                                                                                                |             |             |             |             |
|             | 1                                                                                                                                                                           | 0.82342227  |             |             |             |
| 0.78220183  | 0.33592233                                                                                                                                                                  | 0.237060139 | 1           | 0.836388509 | 0.831486807 |
| 0.335840581 | 0.307744835                                                                                                                                                                 | 1           | 1.097530568 | 1.024516768 | 1.08494484  |
| 0.34784302  | 1                                                                                                                                                                           | 0.878468989 | 1.063968138 | 2.027372907 | 1.298094717 |
| 0.807366806 | 0.971491494                                                                                                                                                                 | 0.828000624 | 0.751201638 | 1           | 0.809450121 |
| 1.392573187 |                                                                                                                                                                             | 0.942786673 | 0.940754067 | 1           |             |
| 1           | 0.691539224                                                                                                                                                                 | 0.900204796 | 0.633026018 | 0.764293831 |             |
| YCL046W     | YCL046W::YCL046W::molecular_function unknown                                                                                                                                |             |             |             |             |
|             | 1                                                                                                                                                                           | 1.243107346 |             |             |             |
| 0.981957069 | 1.494190407                                                                                                                                                                 | 0.890533791 | 1           | 1.316974581 | 1.391787195 |
| 0.860677471 | 0.879454404                                                                                                                                                                 | 1           | 1.221840124 | 1.169508536 | 0.708169969 |
| 1.24802712  |                                                                                                                                                                             | 2.171360377 |             |             |             |
| 1.016470293 | 1                                                                                                                                                                           | 0.704770661 | 0.912914838 | 1.054832604 | 0.707267438 |
| 1.023102166 |                                                                                                                                                                             |             | 1           | 0.990715424 | 1.226572135 |
| 1.213563183 | 1.557381527                                                                                                                                                                 | 0.672723267 | 1.61202375  |             |             |
| YCL048W     | YCL048W::YCL048W::molecular_function unknown                                                                                                                                |             |             |             |             |
|             | 1                                                                                                                                                                           | 1.235219616 |             |             |             |
| 1.437188349 | 1.073009254                                                                                                                                                                 | 1.271832877 | 1           | 1.154097925 | 1.09063197  |
| 1.346187733 | 1.454115907                                                                                                                                                                 | 1           | 1.053470205 | 1.161377562 | 1.968802471 |
| 1.140157408 | 1                                                                                                                                                                           | 0.949718322 | 0.900341469 | 1.07042588  | 1.010870961 |
| 0.935413618 | 1.465349062                                                                                                                                                                 | 0.831019165 | 0.766990769 |             | 1.089904236 |
| 0.893709385 | 1.09014175                                                                                                                                                                  |             | 0.889890967 | 1           | 1.470519425 |
| 1           | 1.309334929                                                                                                                                                                 | 0.788538705 |             | 0.808705771 | 1.341275847 |
| YCL062W     | YCL062W                                                                                                                                                                     |             |             |             |             |
|             | 1                                                                                                                                                                           | 1.306840303 | 1.128041694 | 1.050681288 | 1.407195732 |
| 1.02777428  | 1.151536521                                                                                                                                                                 | 1.208028276 | 1.177863375 | 1           | 0.918818472 |
| 0.868342226 | 0.986155067                                                                                                                                                                 | 0.999021972 | 1           | 0.621510313 | 0.887639582 |
| 0.908403767 | 0.570036655                                                                                                                                                                 | 1           |             | 1.431626734 | 0.923328624 |
| 0.94835715  | 0.849958316                                                                                                                                                                 | 0.726239668 | 1.100122848 | 0.791650484 | 1           |
| 0.742670923 | 0.752874654                                                                                                                                                                 | 0.757537794 | 0.686593982 | 1.350273943 | 1           |
| 0.782745891 | 0.84439524                                                                                                                                                                  | 0.884616111 | 1.18484062  | 1.28705283  | 1.01309692  |
| YCL064c     | YCL064c::CHA1::catabolism of hydroxy amino acids                                                                                                                            |             |             |             |             |
|             | 1                                                                                                                                                                           |             |             |             |             |
| 0.814392225 | 0.668599034                                                                                                                                                                 | 0.743713856 | 1.053105351 | 1           | 0.83678494  |
| 0.836684222 | 1.171765224                                                                                                                                                                 | 1.464069992 | 1           | 0.631667019 | 0.681904069 |
| 1.061662354 | 1.42599559                                                                                                                                                                  | 1           | 0.960008967 | 0.703193077 | 1.125672949 |
| 1.660286077 | 1                                                                                                                                                                           | 0.774851475 | 1.010079602 | 0.79815516  | 1.154281624 |
| 0.985197679 | 1.334715263                                                                                                                                                                 | 1.585943806 | 1.139996511 | 0.840447349 | 1           |
| 0.86732311  | 1.541487404                                                                                                                                                                 | 1.147856216 | 0.473266659 | 0.871283852 | 1           |
| 0.80051641  | 1.198437278                                                                                                                                                                 | 1.539013034 | 0.849115517 | 0.162238026 | 0.750409762 |
| YCL066w     | YCL066w::HMLALPHA1::transcription factor involved in the regulation of alpha-specific genes                                                                                 |             |             |             |             |
|             | 1                                                                                                                                                                           | 1.345113592 | 1.342854459 | 1.013730046 | 1.259107898 |
| 1.025397683 | 1.159100004                                                                                                                                                                 | 1.128129688 | 1.123321895 | 1           | 1.022439631 |
| 1.02684446  | 1.306864022                                                                                                                                                                 | 0.897491083 | 1           | 1.419631016 | 0.868763277 |
| 1.736604159 | 1.451226939                                                                                                                                                                 | 1           | 1.3343799   | 1.928853779 | 1.776695661 |
| 0.971212437 | 1                                                                                                                                                                           | 0.962698189 | 0.982169095 | 0.810640023 | 0.910552746 |

|         |                                                                                                     |             |             |             |             |             |             |   |
|---------|-----------------------------------------------------------------------------------------------------|-------------|-------------|-------------|-------------|-------------|-------------|---|
|         | 0.814899742                                                                                         | 1           |             | 0.617981859 |             | 0.749151736 | 1.218697989 | 1 |
|         | 0.792143799                                                                                         | 1.047646402 | 0.779502749 | 1.127584867 | 1.242510482 |             |             |   |
| YCL068C | YCL068C::YCL068C::molecular_function                                                                | unknown     | 1           |             | 1.219144327 |             |             |   |
|         | 1.310482221                                                                                         | 1.567768027 | 1.201731422 | 1           | 1.318835932 | 1.48330166  |             |   |
|         | 1.167584358                                                                                         | 1.097031955 | 1           | 1.321703488 | 1.419523157 | 1.011799679 |             |   |
|         | 1.39316199                                                                                          | 1           |             | 1.068203062 | 0.739246034 |             |             |   |
|         | 1                                                                                                   | 1.235012512 | 1.346457317 | 1.420841606 | 1.200066845 | 1.414474338 |             |   |
|         | 0.840094083                                                                                         | 0.862871424 | 1.004995447 | 1           | 0.684812502 |             |             |   |
|         | 0.560264139                                                                                         | 0.948377061 | 0.438962223 | 0.566528741 |             |             |             |   |
| YOL034W | YOL034W::SMC5::Structural maintenance of chromosomes (SMC) protein                                  |             |             |             |             |             |             |   |
|         | 1                                                                                                   | 1.178448948 | 1.161780021 | 1           | 1.251954874 | 1.085334385 |             |   |
|         | 1.644202153                                                                                         | 1           | 1.079063807 | 0.266912034 | 1.381768693 | 1           |             |   |
|         | 0.630457314                                                                                         | 0.78820037  | 0.745371251 | 0.918583622 | 1           | 0.694335508 |             |   |
|         | 1.592706037                                                                                         | 1.360261429 | 1           | 0.769101878 | 0.840965244 | 0.828564792 |             |   |
|         | 0.783893115                                                                                         | 1.117383447 | 1           | 1.091687014 | 0.872278816 | 1.068780945 |             |   |
|         | 1.232507702                                                                                         | 1.017694836 | 1           | 1.01322253  | 0.966152762 | 1.284495969 |             |   |
|         | 0.630275227                                                                                         | 1.037840832 | 0.746031646 |             |             |             |             |   |
| YOL036W | YOL036W::YOL036W::molecular_function                                                                | unknown     | 1           |             | 0.927451329 |             |             |   |
|         | 0.810360696                                                                                         | 0.756708254 | 0.728705009 | 1           | 0.747431355 | 0.702828382 |             |   |
|         | 0.760054788                                                                                         | 0.669288267 | 1           | 0.821677931 | 0.666695431 | 0.378257805 |             |   |
|         | 0.713343237                                                                                         | 1           | 0.674630754 | 0.539906468 | 0.425935844 | 0.570618666 | 1           |   |
|         | 0.944681419                                                                                         | 0.686455985 | 0.508819843 | 0.84220929  | 1           | 1.048179702 |             |   |
|         | 0.823066521                                                                                         |             | 0.92512717  | 1           | 0.777337136 | 0.65010833  |             |   |
|         | 0.792660107                                                                                         | 0.883146949 | 0.924221168 | 1           | 0.807456997 | 1.059351849 |             |   |
|         | 0.644618885                                                                                         | 0.895869858 | 0.625195524 |             |             |             |             |   |
| YOL038W | YOL038W::PRE6::alpha-type of subunit of 20S proteasome                                              |             |             |             |             |             | 1           |   |
|         | 0.74930364                                                                                          | 0.947915185 | 0.859354157 | 1.115455642 | 1           | 1.236198773 |             |   |
|         | 0.815720915                                                                                         | 1.121251628 | 1.148208585 | 1           | 0.847424494 | 1.028122491 |             |   |
|         | 0.838663302                                                                                         | 0.996868267 | 1           | 0.821717965 | 0.63172239  | 1.04146159  |             |   |
|         | 1.575978494                                                                                         | 1           | 1.383845358 | 1.592381102 | 2.373267136 | 1.790870986 | 1           |   |
|         | 1.037364493                                                                                         | 1.402858317 | 1.227383926 | 0.745189945 | 0.893806463 | 1           |             |   |
|         | 0.897061684                                                                                         | 1.740332788 | 1.495302004 | 0.869545347 | 1.215272855 | 1           |             |   |
|         | 1.217279663                                                                                         | 1.898441528 | 1.314076209 | 1.141142087 | 1.597138177 |             |             |   |
| YOL040C | YOL040C::RPS15::Homology to rat S15 and E. coli S19                                                 |             |             |             |             |             | 1           |   |
|         | 1.164319007                                                                                         | 1.410911169 | 0.669643328 | 1.321728483 | 1           | 0.866079079 |             |   |
|         | 0.939687096                                                                                         | 1.009994522 | 1           | 0.98910698  | 0.882574366 | 0.809316984 |             |   |
|         | 0.731165609                                                                                         | 1           | 0.906698654 | 0.402113296 | 0.232730312 | 0.538111082 | 1           |   |
|         | 1.248986127                                                                                         | 0.918866002 | 0.353222668 | 0.755244788 | 1           | 1.329180521 |             |   |
|         | 1.138950938                                                                                         | 1.024528213 | 1.188419731 | 1.118433089 | 1           | 0.985306796 |             |   |
|         | 1.649792136                                                                                         | 0.846699385 | 0.612242112 | 1.427993546 | 1           | 0.867455379 |             |   |
|         | 1.31406714                                                                                          | 0.794005676 | 1.10566188  | 0.726932866 | 1.003465128 |             |             |   |
| YOL042W | "YOL042W::NGL1::DNase/RNase (putative); CCR4 C-terminal homolog, homology to drosophila Angel gene" |             |             |             |             |             |             |   |
|         | 1.050433692                                                                                         | 1.128398473 |             | 1.075474532 | 1.07060123  |             |             |   |
|         | 0.891655425                                                                                         | 0.900964418 | 0.999547796 | 1           | 0.54676078  | 0.508271214 |             |   |
|         | 0.626427829                                                                                         | 0.878661004 | 1           | 1.484024567 | 1.538327414 | 1.6247815   |             |   |
|         | 1.075426483                                                                                         | 1           | 0.858822995 | 1.000020451 | 0.993077558 | 1.053426527 |             |   |
|         | 1.083133519                                                                                         | 1           | 1.000982551 | 0.964628423 | 0.890547012 | 0.841033804 |             |   |
|         | 0.868290498                                                                                         | 1           | 1.03394441  | 1.125994156 | 1.161911619 | 0.772509859 |             |   |
|         | 1.202299619                                                                                         | 0.758290381 |             |             |             |             |             |   |
| YOL044W | YOL044W::PEX15::44 kDa phosphorylated integral peroxisomal membrane protein                         |             |             |             |             |             |             |   |
|         | 1                                                                                                   | 0.931872517 | 1.008410605 | 1.065058814 | 0.989645669 | 1           |             |   |
|         | 0.900604714                                                                                         |             | 1.365066482 | 1           | 1.180978931 | 1.008642493 |             |   |
|         | 1.053703612                                                                                         | 1.298738009 | 1           | 1.101752241 | 0.545187319 | 0.894302411 |             |   |
|         | 1.01689083                                                                                          | 1           | 1.482353323 | 1.51163716  | 1.126540443 | 0.690799385 | 1           |   |
|         | 1.06833043                                                                                          | 1.084098582 | 1.378706637 | 1.059788992 | 1.027287509 | 1           |             |   |

|         |                                                                                                                                             |             |             |             |             |                         |
|---------|---------------------------------------------------------------------------------------------------------------------------------------------|-------------|-------------|-------------|-------------|-------------------------|
|         | 1.200082486                                                                                                                                 | 1.228312034 | 1.430166118 | 1.27499316  | 0.901767682 | 1                       |
|         | 1.30050181                                                                                                                                  | 1.138589588 | 1.113374288 |             | 0.985339052 | 1.025355707             |
| YOL057W | YOL057W::YOL057W::molecular_function unknown                                                                                                |             |             |             | 1           | 0.96981303              |
|         | 0.91831053                                                                                                                                  | 1.20586241  | 0.614738363 | 1           |             | 0.739277809             |
|         | 0.713304869                                                                                                                                 | 1           | 0.913951249 | 0.999930961 | 0.662373593 | 1.03552227 1            |
|         | 0.522956827                                                                                                                                 | 0.442017706 | 0.641045576 | 0.627268617 | 1           | 0.809413938             |
|         | 0.798089993                                                                                                                                 | 0.546300214 | 0.846076358 | 1           | 0.968672834 | 0.935361711             |
|         | 1.123887363                                                                                                                                 | 0.979300577 | 1.00803834  | 1           | 0.948094205 | 0.654510545             |
|         | 0.720498563                                                                                                                                 | 0.693193235 | 0.375064229 | 1           | 0.838264013 | 0.727627708             |
|         | 0.886635968                                                                                                                                 | 0.551370806 | 0.704244251 | 0.814330326 |             |                         |
| YOL059W | YOL059W::GPD2::Involved in glycerol production via conversion of glycerol-3-phosphate and NAD+ to glycerol phosphate and NADH 1 0.880801891 |             |             |             |             |                         |
|         | 0.681596133                                                                                                                                 | 0.565478045 | 0.377907381 | 1           | 0.776642465 | 0.744208562             |
|         | 0.429331081                                                                                                                                 | 1           | 1.143488038 | 0.621546145 | 0.474521613 | 0.579208134 1           |
|         | 2.021190057                                                                                                                                 | 0.894562113 | 1.006747049 | 0.62646766  | 1           | 1.355998077             |
|         | 0.557678999                                                                                                                                 | 0.575486679 | 0.534297852 | 1           | 0.862215871 | 0.721721779             |
|         | 0.860968198                                                                                                                                 | 1.097003839 | 0.73044857  | 1           | 0.844530367 | 0.61937163              |
|         | 1.031597676                                                                                                                                 | 1.448632225 | 0.432218335 | 1           | 0.850099869 | 0.632413013             |
|         | 0.970366929                                                                                                                                 | 0.347055471 | 0.463924331 | 0.651464271 |             |                         |
| YCL075W | YCL075W                                                                                                                                     |             | 1           |             |             | 1                       |
|         | 1                                                                                                                                           |             |             |             |             |                         |
|         |                                                                                                                                             | 1           |             | 0.979920425 |             | 1 0.726367221           |
|         | 0.938248928                                                                                                                                 |             | 1           | 1.241525609 |             | 0.485602322             |
|         | 0.785434741                                                                                                                                 |             |             |             |             |                         |
| YOL061W | YOL061W::PRS5::Phosphoribosylpyrophosphate synthetase (ribose-phosphate pyrophosphokinase) 1 0.873961389 1.067903526 0.797940511 1          |             |             |             |             |                         |
|         | 1.218829605                                                                                                                                 | 1.126450609 | 1.028666288 | 0.966855121 | 1           | 1.116747148             |
|         | 0.868427233                                                                                                                                 | 0.787737394 | 0.981652123 | 1           | 0.667828611 | 0.632228888             |
|         | 0.495211991                                                                                                                                 | 0.479370518 | 1           | 0.765134335 | 0.610909959 | 0.287819732             |
|         | 0.75198226                                                                                                                                  | 1           | 0.961612527 | 0.569552522 | 0.682629992 | 0.980880308             |
|         | 0.711233827                                                                                                                                 | 1           | 0.655755938 | 0.420777159 | 0.402414858 | 0.493005129             |
|         | 0.645739703                                                                                                                                 | 1           | 0.739237248 | 0.517045456 | 0.69699678  | 0.662566708             |
|         | 0.575233564                                                                                                                                 | 0.87299711  |             |             |             |                         |
| YOL063C | YOL063C::MOR1::MMS1 Related 1 0.865432093 0.745386583                                                                                       |             |             |             |             |                         |
|         | 1.042444708                                                                                                                                 | 0.598694792 | 1           | 1.047004906 | 1.174882465 | 0.694035229 1           |
|         | 1.035197135                                                                                                                                 | 0.982860405 | 0.565797231 | 0.995341084 | 1           | 0.113193178             |
|         | 0.702696358                                                                                                                                 | 1.555025126 | 0.882611656 | 1           | 1.532799833 | 1.132693957             |
|         | 1.075715805                                                                                                                                 | 0.930296255 | 1           | 1.183168509 | 1.066387585 | 1.300207662             |
|         | 1.124581987                                                                                                                                 | 1.309991653 | 1           | 1.387569383 | 1.39845544  | 1.690722798             |
|         | 1.452318419                                                                                                                                 | 1           | 1.115763617 | 1.025773047 | 1.083546948 | 0.86711633              |
|         | 0.795377881                                                                                                                                 | 0.993833232 |             |             |             |                         |
| YOL063C | YOL063C::MOR1::MMS1 Related 1                                                                                                               |             |             |             |             | 1                       |
|         | 1.808152287                                                                                                                                 | 1.402347773 | 1.418884061 | 1.490175958 | 1           | 1.003687662             |
|         | 1.658665064                                                                                                                                 | 2.144477687 | 1           | 0.54676078  | 0.826172036 | 0.544218422 1           |
|         | 0.69778735                                                                                                                                  |             |             | 1           | 1.119060869 | 1.131964108 1.396824622 |
|         | 1.504688661                                                                                                                                 | 1.138009526 | 1           | 0.960699626 | 0.696057711 | 0.926208712             |
|         | 0.86625653                                                                                                                                  | 0.521584626 | 1           | 0.966104345 | 0.788256261 | 0.943893904             |
|         | 0.794360511                                                                                                                                 | 0.630981648 | 0.823962171 |             |             |                         |
| YCR001W | YCR001W::YCR001W::molecular_function unknown                                                                                                |             |             |             |             | 1                       |
|         | 1.465815859                                                                                                                                 | 1.856688037 | 1           | 1.32356295  |             | 1                       |
|         | 1.193072437                                                                                                                                 | 1.448541587 |             | 1.803802644 | 1           | 1.172578369 0.771326401 |
|         | 1.352301569                                                                                                                                 | 1.397597419 | 1           | 1.26242809  | 2.44632918  | 0.472378795 1           |
|         | 1.138372229                                                                                                                                 | 0.813148816 | 0.859194751 | 1.026784813 | 0.921725989 |                         |
|         | 0.899382241                                                                                                                                 |             |             | 0.776082954 |             | 0.50869172              |
| YCR003w | YCR003w::MRPL32::Mitochondrial ribosomal protein MRPL32 (YmL32) 1                                                                           |             |             |             |             |                         |
|         | 0.9722612                                                                                                                                   | 1.411943937 |             | 1.692031306 | 1           | 1.007611451 1.071664891 |



1.925013727 1.421807069 1 1.278344548 1.545082942 1.201269469 1  
1.527460122 1.394266888 1.58598112 1 1.679904304 2.009797597  
1.847127189 0.97112785 1 0.894796176 1.117616353 0.538900682  
0.651258046 0.936687565 1 1.192369832 1.444078477 1.183335298  
1.32265994 2.325946773 1 1.261811794 1.504440633 1.207673792  
1.934705584 2.04305691 1.177714305  
YCR005c YCR005c::CIT2::non-mitochondrial citrate synthase 1  
1.351571966 1.156648061 1.200078861 0.840371676 1 1.120904255  
1.086616875 1.024821174 0.698183912 1 0.957235756 1.287066933  
1.285006258 0.973283096 1 1.107530806 1.916659841 1.88676331  
1.577356398 1 1.359932588 1.666095199 1.981383857 1.859392449 1  
1.064504538 1.178245586 2.062648718 2.222416886 1.408597863 1  
0.964991393 2.969521632 3.282648161 6.588128015 2.573029178 1  
1.248329448 2.255098896 4.664361437 1.996032291 1.744169496 0.991206341  
YCR007C YCR007C::YCR007C::molecular\_function unknown 1 1.150811584  
1.256223262 1.108255321 1.352262398 1 0.975014927 1.119702708  
1.238380924 1.100142478 1 1.162210703 1.280563542 1.508746049  
1.188440521 1 1.061416726 1.055547423 1.444873483 2.044825713 1  
0.994301759 1.605356161 1.481224348 0.895124161 1 0.864093049  
0.900597077 1.046269624 0.900151749 0.855598279 1 1.01256702  
1.332865057 1.643521421 1.631802484 1.899731053 1 0.779496696  
1.183643361 0.853196871 0.74360768 0.985016629 1.04024128  
YCR009c "YCR009c::RVS161::Protein required for viability after N, C, or S  
starvation. The BAR adaptor proteins encoded by RVS167 and RVS161 form a complex  
that regulates actin, endocytosis, and viability following starvation or osmotic  
stress." 1 0.870838224 0.999520372 0.918916024 1.106702442 1  
0.870053511 0.810118325 1.1064595 0.953736882 1 0.864108471  
1.103592342 1.219249089 0.98251967 1 1.245611782 1.219311247  
0.995242211 1.291523009 1 1.747667609 2.369118622 2.466259641  
1.773040361 1 1.175927194 1.469955736 1.241627271 0.890779989  
1.228313578 1 1.337152336 1.519876723 1.374734917 0.962552758  
1.503609374 1 1.260682405 1.425193267 1.166451594 1.44236807  
1.517805717 1.04199261  
YCR011c YCR011c::ADP1::Shows homology to ATP-dependent permeases 1  
0.859763301 0.778809725 1.215148118 0.793779937 1 1.008340855  
1.158342883 0.791734688 0.797002482 1 1.016341755 1.077858218  
0.790252186 1.061433071 1 2.130892984 1.611002358 2.514580893  
1.101358735 1 1.610015833 1.208912764 1.081154857 1  
1.292891391 1.346147053 1.722835999 1.386071451 1.354058536 1  
1.128189132 0.592208489 1.022805386 0.844828254 0.41393824 1  
0.923371155 0.811150551 0.937557818 0.652343647 0.835864231 0.562150625  
YCR024C YCR024C::YCR024C::asparagine-tRNA ligase\* 1 1.031715986  
1.063050925 1.211647178 1.125592152 1 1.075511216 1.183310625  
0.961441486 1 1.488744172 1.349409492 1.337450581 1.069077334 1  
1.378638745 1.575941907 1.599689542 1.428898517 1 1.454777063  
1.728647927 1.7325618 1.240831558 1 1.598160474 1.953697695  
1.446960837 1.262458115 1.20357354 1 1.675909378 1.083080825  
1.149322053 0.946913863 0.979047782 1 1.286218576 1.243159243  
1.173876516 1.024965614 1.489272761  
YCR025C YCR025C::YCR025C::molecular\_function unknown 1 1.611279304  
1.296264622 1.299543883 1.451575373 1 1.08018667 1.185463961  
1.232081491 1 1.04216898 1.591136697 1.066157579  
0.535161689 1.06514695 0.629886948 1 0.730022921  
0.938775532 0.729480856 1 0.791016432 0.653556314 1.134320005  
0.924007885 0.649540489 1 0.829026451 1.664646142 1  
0.728705681 0.874214499 0.964060295 0.745978903 0.714509171

YOL065C "YOL065C::INP54::INositol polyphosphate 5-Phosphatase, fourth one identified; has homology to Type I mammalian inositol polyphosphate 5-phosphatases" 1 0.988409416 1.008425772 1.127765972 1.289178902 1  
1.027013803 1.070336024 1.234951695 1.370168481 1 1.108746782  
1.060251997 0.517383845 1.085646543 1 0.727477825 0.330425056  
0.94049087 1 1.381096308 1.459972642 1.584444884 1.690532792  
0.868499595 0.895550164 0.992140125 0.860964851 0.811427446 1  
1.235159204 1.181324053 1.524248709 1.078309078 0.977733619 1  
1.01394992 1.09047185 1.054258042 0.712650828 1.101319821 0.86161404  
YOL067C "YOL067C::RTG1::Transcription factor (bHLH) involved in interorganelle communication between mitochondria, peroxisomes, and nucleus" 1  
0.833920722 0.835644798 0.983849215 0.543701974 1 0.972463224  
0.987738771 1.015030409 0.829160235 1 1.016058691 1.052776283  
0.777291603 1.050282935 1 0.444959012 0.619507909 0.70915655  
0.483065879 1 0.834605224 1.020606541 1.016371565 0.605820074 1  
1.135961236 0.91508812 1.149296289 1.572313579 1.034497137 1  
0.948965609 0.925238754 0.936360709 0.979702774 0.806663917 1  
0.681369153 0.607964748 0.579001015 0.484681161 0.578625035 0.577911863  
YOL067C "YOL067C::RTG1::Transcription factor (bHLH) involved in interorganelle communication between mitochondria, peroxisomes, and nucleus" 1  
2.087363537 1 2.146698733 2.080237207 1  
2.097120482 2.031750328 1  
0.555689731 1 1.138176692 1.164549188 1.556123054  
1.927091844 1.655507863 1 0.803382214 0.460220151 0.680664568  
1.115327415 0.295260353 1.066963176 0.786069272 1.327345645  
0.64742578 1.322306141  
YOL081W YOL081W::IRA2::Negatively regulates cAPK by antagonizing CDC25 1  
2.056732472 1.838244187 1.66291956 1.866081184 1 1.820371357  
1.605636841 1.766263722 1.723592809 1 1.556874647 1.227745433  
1.191100542 1.466617034 1 0.574051116 0.590478665 0.5561172  
0.525684079 1 0.975936114 0.885257419 1 0.907786322  
0.868087634 1.075895125 1.082898778 0.969210863 1 1.58378252  
1.493022335 1.401318227 1.605712909 1.478745839 1 1.113387735  
1.034677078 0.842427201 1.319281258 0.806801861 1.568242592  
YLR453C YLR453C::RIF2::Rap1p-Interacting Factor 2; interacts with the c-terminus of Rap1p and with Rif1p; has functional similarities with Rif1p; Rif2p and Rif1p have synergistic effects on telomere length and chromosome loss 1  
1.617501305 1 1.488236695 1  
1.396199284 1.439414237 1 0.330950101 0.563400498  
1.087834662 0.908918823 1 1.21523451 0.693736426 0.644535027 1  
0.930681046 0.791551803 0.976275922 1  
0.715853875 0.97908686 1.176429 1.103286232  
YOL083W YOL083W::YOL083W::molecular\_function unknown 1 1.438493924  
1.380907895 1.736350336 1 1.313920016 1.593385927  
1.927760194 1 1.404071197 2.059524389 2.758473538  
1.851194089 2.16579879 1.204761906 0.810260209  
0.721856949 1 1.167408173 1.438707473 2.361819858 1.2693002  
1.186906079 1 1.099556703 1.629124059 2.073007684 2.100459073  
1.02556587 1 1.706345543 2.230532357 1.612835498 1.320935308  
2.399412032 1.36772472  
YLR455W YLR455W::YLR455W::molecular\_function unknown 1 0.76934841  
0.873042625 0.950348894 1.057913262 1 0.841851474 0.892196606  
0.878838034 0.873438376 1 0.729173531 0.710039783 0.613145728  
1.008528011 1 0.629607318 0.379652929 0.553788987 0.779707335 1  
1.030026554 0.843309469 0.930111971 1.371803009 1 0.826469618  
0.838806943 0.665780361 0.793204054 0.861982723 1 0.820567124

|         |                                                         |             |             |             |             |             |             |
|---------|---------------------------------------------------------|-------------|-------------|-------------|-------------|-------------|-------------|
|         | 0.642154068                                             | 0.745725932 | 0.627169606 | 0.683489982 | 1           | 0.935647769 |             |
|         | 0.757220579                                             | 0.910708459 | 0.888239982 | 1.107709369 | 0.767922225 |             |             |
| YOL085C | YOL085C::YOL085C::molecular_function unknown            |             |             |             |             | 1           | 2.130120679 |
|         | 1.650862226                                             | 1.49621116  | 1.855799377 | 1           | 1.817958947 | 1.412051585 |             |
|         | 1.730992169                                             | 1           | 2.037723476 | 1.78266707  | 2.010444653 | 1.556408046 | 1           |
|         | 0.657935315                                             |             | 1.32282285  | 0.705641276 |             | 0.189759224 |             |
|         | 0.314181731                                             | 1           | 1.104767078 | 1.083418902 | 1.159092125 | 1.110172538 |             |
|         | 0.999317603                                             | 1           | 1.291656568 | 1.449527471 | 1.027897212 | 0.947535988 |             |
|         | 1.526260505                                             | 1           | 0.828134042 | 1.023215374 | 0.976265882 | 0.965980647 |             |
|         | 1.475666454                                             |             | 1.011345695 |             |             |             |             |
| YLR457C | YLR457C::NBP1::Naplp Binding Protein                    |             |             |             |             | 1           | 0.700093004 |
|         | 1.041706202                                             | 0.861067934 | 1.172825855 | 1           | 0.987187852 | 1.326980701 |             |
|         | 1.117301639                                             | 1           | 0.901981486 | 0.794485666 | 1.001308763 | 1.186521727 | 1           |
|         | 0.477391874                                             | 0.608927575 | 0.489829756 | 0.990693865 | 1           | 1.582635849 |             |
|         | 1.566130091                                             |             | 2.223743137 | 1           | 1.040893253 | 1.025357178 | 0.974614775 |
|         | 0.895507246                                             | 1.156580914 | 1           | 0.940313114 | 1.104515698 | 0.962322416 |             |
|         | 0.896475523                                             | 1.206523909 | 1           | 1.060553875 | 0.982562565 | 1.073919618 |             |
|         | 0.966189216                                             | 1.074563582 | 1.021853256 |             |             |             |             |
| YOL087C | YOL087C::YOL087C::molecular_function unknown            |             |             |             |             |             | 0.966560327 |
|         | 1.035185539                                             | 1.382028391 | 0.93687335  |             | 1.330590044 | 1.465241579 |             |
|         | 1.075883729                                             | 0.769435136 |             | 1.309316311 | 1.275606671 | 1.185555645 | 1           |
|         | 1.333040398                                             | 0.997000047 | 1.414551932 | 0.744148624 | 1           | 1.117702206 |             |
|         | 1.102060834                                             | 0.720413446 | 0.792984762 | 1           | 1.087100567 | 1.15833558  |             |
|         | 1.364828801                                             | 1.184374119 | 1.178824306 | 1           | 1.150607234 | 0.69511744  |             |
|         | 0.851268594                                             | 0.799189134 | 0.635305544 | 1           | 1.202382745 | 1.032640222 |             |
|         | 1.123719051                                             | 1.025459569 | 1.171882531 | 0.750409762 |             |             |             |
| YLR459W | YLR459W::CDC91::member of major facilitator superfamily |             |             |             |             | 1           |             |
|         | 1.499393093                                             | 1.064750079 | 1.139930601 | 1.393376986 | 1           | 1.115559227 |             |
|         | 0.929521824                                             | 1.271986474 | 1.139047026 | 1           | 1.293281946 | 0.922701252 |             |
|         | 1.087685766                                             | 1.048118816 | 1           | 0.800358462 | 0.512097983 | 0.65141504  |             |
|         | 0.709083093                                             | 1           | 0.483998004 | 0.856182123 | 0.583445498 | 0.551154525 | 1           |
|         | 1.217069047                                             | 1.014423221 | 0.934615504 | 1.228248149 | 0.617610329 | 1           |             |
|         | 0.687004876                                             | 0.927745226 | 0.999228221 | 0.717968519 | 0.723562275 | 1           |             |
|         | 0.942121728                                             | 1.057231792 | 0.939838379 | 1.169809797 | 1.088319727 | 0.733772912 |             |
| YOL089C | YOL089C::HAL9::involved in salt tolerance               |             |             |             |             | 1           | 1.173066909 |
|         | 1.192793309                                             | 1.471536039 | 1.304592729 | 1           | 1.391340505 | 1.522221701 |             |
|         | 1.263897827                                             | 1.372536395 | 1           | 1.192857767 | 1.32315918  | 1.037246827 |             |
|         | 1.34980592                                              | 1           | 0.759389942 | 0.47211078  | 1.034147762 | 0.869071265 | 1           |
|         | 0.800010638                                             | 1.422422926 | 1.195707243 | 1.001396869 | 1           | 0.93015626  |             |
|         | 1.026652701                                             | 0.910553283 | 1.017243423 | 0.884957985 | 1           | 0.969255803 |             |
|         | 0.771840021                                             | 0.806460589 | 1.019356397 | 0.806945013 | 1           | 1.097392885 |             |
|         | 1.202320984                                             | 1.244476894 | 1.03629859  | 1.107516857 | 0.847604027 |             |             |
| YCR029C | YCR029C                                                 |             |             |             |             | 1           | 1.507302598 |
|         | 1.393508551                                             | 1.399346677 | 1.537390519 | 1.439586756 | 1           | 1.505940203 |             |
|         | 1.642416252                                             | 2.378742585 | 1.085616445 |             | 0.831129394 | 0.856260935 |             |
|         | 0.606810995                                             | 0.614758649 | 1           |             | 2.014190873 | 1.451578715 | 1           |
|         | 1.152267227                                             | 1.452797416 | 1.370758377 | 1.236835165 | 0.947917452 | 1           |             |
|         | 1.233161066                                             | 1.29453352  | 1.151719502 | 0.819661592 | 0.880982046 | 1           |             |
|         | 1.109701673                                             | 1.220084898 | 0.928556407 | 1.051255564 | 1.094390803 | 0.971942653 |             |
| YOL091W | YOL091W::SPO21::sporulation defective                   |             |             |             |             | 1           | 1.289277065 |
|         | 1.334022855                                             | 1.276393964 | 1.351555164 | 1           | 1.19475175  | 1.525170768 |             |
|         | 1                                                       | 0.984279299 | 0.981101821 | 1.159349003 | 1.240413594 | 1           | 0.704869049 |
|         | 0.848360921                                             | 1.443102069 | 1.444492929 | 1           | 0.860404879 | 1.252300169 |             |
|         | 1.341172628                                             | 0.708739367 | 1           | 0.754202485 | 0.950264682 | 1.039907748 |             |
|         | 1.053213706                                             | 0.959635056 | 1           | 0.515725501 |             | 0.675669883 |             |
|         | 2.207150008                                             | 1           |             | 0.659500003 | 1.325051364 | 0.674789275 | 0.724750282 |
|         | 0.660220503                                             |             |             |             |             |             |             |

YLR461W YLR461W::PAU4::member of the seripauperin protein/gene family (see  
Gene\_class PAU) 1 1.281482657 1.601966648 1.062922113 1.576990209 1  
1.242428223 1.060152996 1.584526959 1.322391569 1 1.536108644  
1.281738518 1.958322021 1.449822203 1 1.042464194 0.828745672  
1.475266403 1.496571404 1 1.12542047 2.270103662 1.705905518  
1.274849699 1 1.049221474 1.166123859 1.105960754 0.989866915  
0.989308403 1 0.9202245 1.514825398 1.74292792 1.236887275  
1.5357568 1 1.165049048 1.038078801 0.698381628 1.271076233  
1.42026211

YOL105C YOL105C::WSC3::cell wall integrity and stress response component 3  
1 1.686995016 1.2522539 1.581216868 1.2402951 1 1.533919875  
1.549122175 1.123558957 1.195645479 1 1.413700141 1.328087436  
1.067373717 1.017383002 1 0.948026456 1.408319936 1.076284526 1  
0.878905628 1.369165644 1.506714413 0.629737828 1 1.076969315  
1.071364011 1.034516531 1.141287661 0.701524374 1 0.627175402  
0.421658362 0.485416669 0.567242783 1 0.635848391 0.565117681  
0.910100685 0.645779475 0.772807633 0.694369817

YCR030C YCR030C::SYP1::<u>S</u>uppressor of <u>Y</u>east <u>P</u>rofilin  
deletion 1 0.872990498 1.084846997 0.687453319 1 1.1715914  
1.298554344 0.76749221 0.711398609 1 1.452957053 1.280977837  
0.837440387 0.83359564 1 1.349009803 1.01324389 1.744388034  
0.556765429 1 1.03964667 1.015396697 0.558024783 0.647575369 1  
0.975117786 1.083546248 1.074938956 0.983405999 0.660889189 1  
0.930250649 0.646451088 0.844989099 0.78400405 0.387885351 1  
1.130693909 0.916035048 0.996381344 0.639995855 0.800866731 0.560399347

YLR463C YLR463C::YLR463C::molecular\_function unknown 1 0.787870488  
0.548573296 0.945683169 0.346161744 1 1.056429995 1.099110766  
0.585421782 0.444596094 1 0.848678769 0.810233087 0.270376766  
0.803674752 1 0.607370307 0.405789768 0.690463904 0.573843902 1  
0.556414763 0.534453872 0.428931656 0.490373937 1 0.872902325  
0.910935284 1.181507305 1.299814912 1.066021383 1 0.743641596  
0.451145824 0.784194459 1.074746348 0.395540978 1 0.68987287  
0.528725113 0.879673392 0.549286581 0.617849184 0.661971729

YOL107W YOL107W::YOL107W::molecular\_function unknown 1 1.291956717  
1.135062741 1.032883854 1.186853741 1 1.364620168 1.078949014  
1.373189772 1 1.378865124 1.141608793 1.252473546 0.93059635 1  
1.727840369 1.104047886 1.355750868 1.496427179 1 1.198650185  
1.556743052 1.071734357 0.800526258 1 1.181113629 1.388043542  
1.190917341 1.177215117 0.922471704 1 1.009683596 1.09069894  
1.103335777 1.419010196 1.078893331 1 0.998049295 1.100390196  
1.098633693 0.853342114 1.126663618 1.056002518

YCR032W YCR032W::BPH1::beige protein homologue 1 1 1.295408707  
1.482573597 1.032242112 1 1.334705061 1.386955993 1.074559332  
1.022250561 1 1.175296929 1.262575853 0.752148816 1.235049555  
1.006103968 1 1.070526475 0.702777758 0.712470191 1.061189832  
1 1.016335778 0.995656745 1.094057628 1.260104884 1.061705632 1  
0.938326393 0.850501086 0.685604406 0.862258062 1 0.703882955  
0.622780165 0.950897952 0.660664659 0.898210418 0.828340286

YML011C YML011C::YML011C::molecular\_function unknown 1 1.213486577  
1.320050599 1.020975626 1.599106073 1 1.141921064 1.007433384  
1.436226413 1.602182396 1 1.010219233 1.098812218 1.400855164  
1.197681239 1 1.091399922 0.965071911 0.911076007 1.571244091 1  
1.125773457 1.373031927 1.004539101 0.998615646 1 0.971594131  
0.871221998 0.94565126 0.814222964 1.201215648 1 0.805582428  
1.041491646 0.969315279 0.88543798 0.978049185 1 0.914824956  
0.873084864 0.859906591 1.407883689 0.848376447 1.301177213

YCR046C YCR046C::IMG1::Required for respiration and maintenance of  
mitochondrial genome 1 1.158108489 1.54145587 0.898208798 0.918449397 1  
1.118539386 1.377906862 1.355357557 1.240812368 1 1.203053102  
1.311743094 2.118725899 0.933659123 1 1.340644124 1.557659907  
1.512764964 1.930568484 1 1.489185539 2.257659342 1.601975837  
1.347888203 1 1.168031085 1.225979706 1.090055766 0.973722429 1  
0.842737163 1.134876051 0.917891214 0.949585233 1.198900862 1  
0.763832428 0.914354793 0.925729031 1.180614423 0.867743381  
YML013W YML013W::SEL1::<U>SE</U>cretion <U>L</U>owering 1 0.875198952  
0.76407304 0.893179477 0.39689294 1 1.223943974 1.416054312  
0.645802942 0.638390892 1 1.327613099 1.353285664 0.818311424  
0.877011438 1 0.864389227 0.518735483 0.870316716 0.793351761 1  
1.588555274 1.116731431 0.679828327 1 1.297840716 1.38709828  
1.511701405 1.448369074 1.178928981 1 0.907776665 0.625867033  
0.756221459 1.078279909 0.388484742 1 1.147176966 0.748408439  
1.168334531 0.912272965  
YCR048w YCR048w::ARE1::Acyl-CoA cholesterol acyltransferase (sterol-ester  
synthetase) 1 1.111609834 0.78455241 0.816888031 0.461121578 1  
1.165789774 1.076091155 0.662312728 0.696765639 1 1.441928623  
1.089631469 0.771346722 0.748945742 1 1.161794238  
0.802659818 0.759036896 0.86773797 1 0.946604253  
1.070498565 1.145622816 1.443234796 1.095056973 1 0.808803951  
0.717200289 0.716753658 1.135352208 0.445802696 1 0.756969632  
0.710842881 1.044791754 0.68367348 0.814852966 1.318689781  
YML015C YML015C::TAF11::TFIID subunit (TBP-associated factor) with predicted  
molecular weight of 40 kD. 1 0.636141023 0.867655326 0.842764904  
0.941938243 1 0.741319496 0.787462712 0.915642312 1  
0.657381697 0.762632123 0.808166097 1.019586948 1 0.369155912  
0.434399788 0.703966426 0.725137529 1 0.700684934 1.020307608  
0.84425362 0.577587872 1 0.907414042 1.107647232 0.898723469  
0.943556629 1.020720375 1 0.897722173 0.848142416 0.947229925  
1.638007353 1.664030827 1 0.983765455 0.679100293 1.295817014  
0.702589508 0.980944996 0.704877326  
YCR050C YCR050C::YCR050C::molecular\_function unknown 1 1.836280996  
1.456210127 1.184132277 1.308335217 1 1.4219899 1.13999978  
1.511395839 1 1.723315054 1.538699037 1.963258806 1.360751554  
0.5597467 0.214206728 1  
1.0537142 1.048521518 1.283536024 1.468835182 0.981633128 1  
0.834351232 1.103090626 0.995009825 1.306535146 1 1.04691855  
0.903994272 1.365573226 1.248639823  
YML018C YML018C::YML018C::molecular\_function unknown 1 1.214685098  
0.813358762 0.89776639 1.169129082 1 0.89297661 0.634077666  
1.330284891 1 0.671603506 0.552998439 0.533674572 0.684735197 1  
0.444811278 0.928901005 0.902543925 0.628897344 1 0.394111503  
0.341311421 0.329442744 0.38465397 1 1.213623669 0.957327209  
1.108696496 1.757267407 1.404692625 1 0.744530118 0.528507458  
0.56158529 0.783302014 0.66379731 1 0.68365856 0.540380246  
0.839971319 0.731004568 0.72106707 0.476339482  
YCR052w "YCR052w::RSC6::a subunit of RSC, a fifteen-protein chromatin  
remodeling complex and related to the swi/snf complex." 1 0.791297765  
0.872818266 0.689361825 0.5230318 1 0.957715098 0.999722507  
0.63048439 0.62101541 1 0.850808449 0.965149458 0.627920666  
0.665279947 1 0.759376418 0.587796815 0.711233117 0.653050242 1  
0.636142448 0.643079575 0.598904242 0.509791664 1 0.876372054  
0.871318578 0.926500682 0.854086724 1.010433433 1.085710217  
0.924939748 0.864536465 1.303353411 0.80898654 1 0.802360263  
0.748476437 1.026142947 0.546790531 0.975312055 0.767922225

|         |                                                                                                           |             |             |             |             |
|---------|-----------------------------------------------------------------------------------------------------------|-------------|-------------|-------------|-------------|
| YCR056W | YCR056W                                                                                                   | 1.00103636  | 0.75161991  | 1.431226848 | 0.65982513  |
|         | 1.129609258                                                                                               | 1.098382    | 1.090458558 | 0.932986604 | 0.52324427  |
|         | 0.558474573                                                                                               | 0.324861345 | 1.322614091 | 1           | 1           |
|         |                                                                                                           | 1           | 0.649442447 | 0.490260452 | 0.614534757 |
|         | 0.939003002                                                                                               | 1           | 0.536417099 | 0.261636058 | 0.19890514  |
|         | 0.205736359                                                                                               | 1           | 0.36500771  | 0.278502338 | 0.779743939 |
|         | 0.343882421                                                                                               | 0.514866912 |             |             | 0.503932383 |
| YCR070w | YCR070w                                                                                                   | 1           | 1.194998823 | 1.245583621 | 1.010396635 |
|         | 1.133840923                                                                                               | 1.184599636 | 1.110222919 | 1.009119401 | 1           |
|         | 1.534230447                                                                                               | 1.974778624 | 1.145448646 | 1           | 2.112441317 |
|         | 1.819470385                                                                                               | 1.342974811 | 1           | 1.381675053 | 1.325615045 |
|         | 0.831461135                                                                                               | 1           | 1.190446032 | 1.165224    | 1.048590045 |
|         | 0.858141674                                                                                               | 1           | 1.023740074 | 1.496948528 | 1.270266064 |
|         | 1.199353253                                                                                               | 1           | 1.29573914  | 1.505578348 | 1.074022163 |
|         | 1.424851879                                                                                               | 1.086649433 |             |             | 1.034103647 |
| YCR072C | YCR072C::YCR072C::molecular_function                                                                      | unknown     | 1           | 0.972105744 |             |
|         | 0.73476073                                                                                                | 1.219028274 | 0.720947758 | 1           | 1.088885187 |
|         | 0.88324406                                                                                                | 1.058964645 | 1           | 0.542151014 | 0.570172692 |
|         | 1.056378687                                                                                               | 1           | 0.545819354 | 0.547182988 | 0.724549853 |
|         | 0.526325743                                                                                               | 0.229425092 | 0.500296439 | 1           | 0.915415972 |
|         | 0.96598702                                                                                                | 1.278520768 | 1.086802488 | 1           | 0.650422818 |
|         | 0.48487969                                                                                                | 0.900914866 | 0.367546529 | 1           | 0.622872069 |
|         | 0.92959675                                                                                                | 0.653284583 | 0.447680635 | 0.904519585 | 0.432961957 |
| YOL111C | YOL111C::YOL111C::molecular_function                                                                      | unknown     | 1           | 0.880836802 |             |
|         | 1.177315206                                                                                               | 0.754548047 | 0.903084266 | 1           | 0.907920873 |
|         | 0.924995205                                                                                               | 0.826497499 | 1           | 1.128823778 | 1.187485758 |
|         | 0.79834617                                                                                                | 1           | 1.184212916 | 0.857742614 | 1.089438205 |
|         | 1.333651153                                                                                               | 1.501642422 | 1.619552566 | 1.10739472  | 1           |
|         | 1.032853304                                                                                               | 0.701522021 | 0.808748741 | 0.809928714 | 1           |
|         | 1.362261016                                                                                               | 0.930557173 | 0.978100701 | 1.41210333  | 1           |
|         | 1.113614905                                                                                               | 0.838667032 | 1.180243738 | 0.962782621 | 1.408878988 |
| YOL113W | YOL113W::SKM1::Serine/threonine protein kinase with similarity to Ste20p and Cla4p                        | 1           | 0.797609386 | 0.936825622 | 0.995670645 |
|         | 0.923104251                                                                                               | 0.875227064 | 1.101361429 | 0.943495909 | 1           |
|         | 0.886278778                                                                                               | 0.773727045 | 0.897010859 | 1           | 0.912619934 |
|         | 0.942943199                                                                                               | 0.730292111 | 1           | 1.116712344 | 1.024285941 |
|         | 0.780568257                                                                                               | 1           | 0.754064362 | 0.704804722 | 0.796817615 |
|         | 0.918199958                                                                                               | 1           | 1.372870716 | 0.970489991 | 0.87931857  |
|         | 0.943225503                                                                                               | 1           | 0.800093574 | 0.812873368 | 0.978598078 |
|         | 0.735329636                                                                                               | 1.516580762 |             |             | 1.061919265 |
| YOL115W | YOL115W::TRF4::TRF5 homolog; Involved in mitotic chromosome condensation; associates with Smc1p and Smc2p | 1           | 1.074929229 | 1.066644474 |             |
|         | 1.109825216                                                                                               | 0.92122078  | 1           | 1.209685507 | 1.313068632 |
|         | 0.941718656                                                                                               | 1           | 0.826422803 | 1.088127639 | 0.815113066 |
|         | 0.533059379                                                                                               | 0.412258363 | 0.725908494 | 0.602108861 | 1           |
|         | 0.871441727                                                                                               | 0.69105173  | 0.910307414 | 1           | 0.749771438 |
|         | 0.947345005                                                                                               | 0.88960666  | 0.985790345 | 1           | 1.111325747 |
|         | 0.539953802                                                                                               | 1.191381151 | 0.569744351 | 1           | 0.905329136 |
|         | 0.992507137                                                                                               | 0.945592849 | 0.693659118 | 1.9106115   | 0.828607506 |
| YML020W | YML020W::YML020W::molecular_function                                                                      | unknown     | 1           | 0.855626951 |             |
|         | 1.039492686                                                                                               | 1.079650332 | 1.213058636 | 1           | 1.095834318 |
|         | 0.980506158                                                                                               | 0.875275645 | 1           | 0.829698942 | 0.84871599  |
|         | 1.042067748                                                                                               | 1           | 0.798726168 | 0.797610955 | 1           |
|         | 1.16673956                                                                                                | 1           | 0.673574183 | 0.64428682  | 0.511460535 |
|         | 1.028288475                                                                                               | 1           | 0.819484846 | 0.46268083  | 0.617076699 |
|         | 1.185582919                                                                                               | 1           | 0.745060041 | 0.57389877  | 0.973481022 |
|         | 1.117183395                                                                                               | 1.073514981 |             |             | 1.009308017 |

YOR059C      YOR059C::YOR059C::molecular\_function unknown      1      0.665859287  
0.899126904 0.801169984 0.875978157 1      0.838726674 0.94459703  
0.885678768 1      0.966207672 1.142195116 0.938486634      1  
1.007715623 0.981919853 1.2431926      1.366951685 1      1.758983114  
2.144958035 3.138526649 1.212950092 1      1.45973208 1.349767352  
1.430715806 1.635663914 1.709224222 1      1.150581272 1.06252384  
1.096663552 0.979164192 0.832507058 1      0.988667991 0.83316108  
0.819807679 1.218067253 1.126893825 2.838773098  
YOR059C      YOR059C::YOR059C::molecular\_function unknown      1      1.350334123  
1.197003155 1.315811952 1.223203931 1      1.399398435 1.369701253  
1      1.091928151 1.096118328 0.92012335 1.059166624      1.21644585  
1.236216046 1.010844785 1      0.658658085      1  
0.966262339 1.477588131 1.260596331 0.779954803 1.045785527 1  
1.266846265 2.017293705 1.649875937 1.306112826 1.164490283 1  
1.549169774 1.369170719 1.014349357 1.312198344 1.253893604  
YML022W      YML022W::APT1::Adenine phosphoribosyltransferase      1  
1.832864626 1.407732268 1.052205275 1.663793936 1      1.289994071  
0.934672123      1.541882008 1      1.108812063 0.722060172 0.822661398  
1.069769398 1      0.708096842 0.291929707 0.293051934 0.81650034  
0.846349407 0.500962127      0.753383882 1      1.125010797 0.936861282  
1.281943405 1.441410636 1.000879554 1      1.051459747 1.043271446  
0.861527377 0.518764061 0.587361649 1      0.87884425 0.714123417  
0.642531323 0.90811867 0.413140075 1.096281225  
YOR061W      YOR061W::CKA2::may have a role in regulation and/or execution of the  
eukaryotic cell cycle      1      0.985153998 1.140095134 1.079341888 1.02000996 1  
1.066298069 1.086497095      1.049297784 1      0.92983358 0.949434038  
0.850079214 1.020030799 1      0.948128422 0.755188349 0.573442411  
0.891991077 1      1.190346525 0.631783829 0.967899941 1.013418021 1  
0.966432048 0.844879034 0.895920545 0.886220641 1.127318686 1  
1.154206797 1.130796109 1.008173479 1.008898989 0.86061638 1  
1.080263194 0.709117359 0.90722112 1.046201909 0.842215325 1.065634415  
YML041C      YML041C::VPS71      1      1.052320869 1.230567976 0.994384448  
1.530592343 1      0.94357636 0.915101074 1.656623708 1.27516515 1  
1.050570355 1.27315654 1.655215097 1.231052102 1      1.054361952  
0.821757387 0.998452758 1.418375213 1      1.308142797 2.019877184  
1.277407901 1      0.722203155 0.853589485 0.572002663 0.672586415  
0.823632739 1      1.035030236 1.203844069 1.111973612 1.659500736      1  
1.324729646 1.366873669 1.417490582 1.507426924 1.469628169 1.072639421  
YOR063W      YOR063W::RPL3::Homology to rat L3      1      1.488912481 0.781957846  
1.055537716 0.619307936 1      1.498542175 1.162039689      0.758263806 1  
1.058776088 0.794845562 0.39373063 0.690484756 1      0.799157805  
0.373158539 0.194182491 0.451883606 1      1.031968196 0.151763668  
0.105899059 0.781450243 1      1.253097446 0.984909814 1.559353712  
1.249797589 1.525121832 1      1.044062651 0.733222941 0.830607484  
0.541382021 0.409190337 1      1.1097543 0.484873714 1.020651098  
0.618167757 0.56055225 0.935166396  
YOR065W      YOR065W::CYT1::Cytochrome c1      1      1.369927558 1.292324517  
1.363488065 1.362177896 1      1.45286963 1.187011163 1.288520322  
1.352754849 1      1.113917299 1.160673101 1.225572418 1.113667659 1  
0.862882706 0.906666054 0.825002462      1      1.173315583 1.109570337  
1.167823821 0.839865095 1      0.500273201 0.329342033 0.430411496  
0.783899316 0.905382061 1      0.29415557 0.132730316 0.155265891  
0.315826146      1      0.314651898 0.200195944 0.452614432 0.883526912  
1.363248368 1.50519764  
YOR065W      YOR065W::CYT1::Cytochrome c1      1      0.739209578 0.930033062  
0.742571661 0.690265975 1      0.99519188 0.99454775 0.673776624  
0.735392132 1      0.530731117 0.720904316 1.073174719 0.401239234 1

|             |                                                                                                                                                             |             |             |             |             |             |   |
|-------------|-------------------------------------------------------------------------------------------------------------------------------------------------------------|-------------|-------------|-------------|-------------|-------------|---|
| 1.198500932 | 0.697642342                                                                                                                                                 | 1.72335734  | 1.489372341 | 1           | 1.104310802 |             |   |
| 0.902821844 | 2.011187451                                                                                                                                                 | 1.215220749 |             | 0.851380697 | 0.858734159 |             |   |
| 0.874942313 | 0.916229468                                                                                                                                                 | 1.116669677 | 1           | 1.70023754  | 0.862436875 |             |   |
| 1.629877002 | 0.912856617                                                                                                                                                 | 0.950453908 | 1           | 0.847895665 | 1.265434948 |             |   |
| 0.716679712 | 0.972455242                                                                                                                                                 | 0.465133747 | 1.712720518 |             |             |             |   |
| YML043C     | "YML043C::RRN11::rDNA transcription factor CF component, which also contains Rrn6p and Rrn7p, which is required for rDNA transcription by RNA polymerase I" |             |             |             |             |             |   |
| 1           | 0.637857903                                                                                                                                                 |             | 1.063174977 | 1           | 0.841629329 |             |   |
| 0.784956281 | 1.160000742                                                                                                                                                 | 1           | 0.32168993  | 0.174119942 | 0.356472958 |             |   |
| 1.075417374 | 1                                                                                                                                                           | 0.15448739  |             | 0.489445628 | 1           | 0.594562894 |   |
| 1.31380176  | 0.749167564                                                                                                                                                 | 1           | 0.44374153  | 0.468122653 | 0.447598383 |             |   |
| 0.571633062 | 0.869606182                                                                                                                                                 | 1           | 0.397812607 | 0.707588527 |             |             |   |
| 1.940378835 | 1                                                                                                                                                           | 0.608348314 | 0.727833046 | 1.306741677 | 0.858602772 |             |   |
| 0.936295311 |                                                                                                                                                             |             |             |             |             |             |   |
| YOR067C     | YOR067C::ALG8::adds glucose to the dolichol-linked oligosaccharide precursor prior to transfer to protein                                                   |             |             |             |             |             |   |
| 1           | 1.4393697                                                                                                                                                   | 1.024056716 |             |             |             |             |   |
| 1.193993065 | 1.143410536                                                                                                                                                 | 1           | 1.363374595 | 1.04718179  | 0.973475934 |             |   |
| 0.950839832 | 1                                                                                                                                                           | 1.096457452 | 0.9068145   | 0.803628469 | 1.016385712 | 1           |   |
| 0.709281838 | 0.970010156                                                                                                                                                 | 1.179611189 | 0.614343483 | 1           | 0.617298404 |             |   |
| 0.557647173 | 0.240979528                                                                                                                                                 | 0.396602967 | 1           | 0.849748243 | 0.728723982 |             |   |
| 0.820645099 | 1.263824243                                                                                                                                                 | 1.034339564 | 1           | 1.273366485 | 0.675398139 |             |   |
| 0.61440328  | 0.603126546                                                                                                                                                 | 0.42025426  | 1           | 0.753648079 | 0.473580941 |             |   |
| 0.600417505 | 0.893722994                                                                                                                                                 | 0.576896847 | 0.68386236  |             |             |             |   |
| YCR074C     | YCR074C                                                                                                                                                     | 1           | 1.167087614 | 1.141434814 | 0.882011323 | 0.699079024 | 1 |
| 1.098491545 | 1.127871647                                                                                                                                                 | 1.127194429 | 0.933719217 | 1           | 1.342240264 |             |   |
| 1.564818317 | 1.63401379                                                                                                                                                  | 1.044982474 | 1           | 1.092397958 | 1.007867281 |             |   |
| 1           | 1.3292233                                                                                                                                                   | 1.086422925 | 1.427340247 | 0.661178177 | 1           | 0.992065368 |   |
| 0.949782976 | 1.243911693                                                                                                                                                 | 1.146717916 | 1.178099217 | 1           | 0.979752072 |             |   |
| 0.771687063 | 0.751688043                                                                                                                                                 | 0.755397708 | 0.433225677 | 1           | 1.000934161 |             |   |
| 1.021306501 | 0.525064918                                                                                                                                                 | 1.125459376 | 0.829215951 |             |             |             |   |
| YML046W     | YML046W::PRP39::May function to facilitate or stabilize the interaction between U1 snRNP and the 5' splice site in pre-mRNAs                                |             |             |             |             |             |   |
| 1           |                                                                                                                                                             |             |             |             |             |             |   |
| 0.778493775 | 0.73570105                                                                                                                                                  | 1.065140514 | 0.769400355 | 1           | 0.995976695 |             |   |
| 1.081582359 |                                                                                                                                                             | 0.957683313 | 1           | 0.653508628 | 0.673604248 | 0.561052153 |   |
| 0.88542723  | 1                                                                                                                                                           | 0.590095491 |             | 0.557365886 | 0.75499964  | 1           |   |
| 1.150394408 |                                                                                                                                                             | 0.801930938 | 0.862480244 | 1           | 0.803205446 | 0.844133961 |   |
| 0.782607693 | 0.85831555                                                                                                                                                  | 0.919090189 | 1           | 0.81428488  | 0.720161544 |             |   |
| 0.717427357 | 0.81163379                                                                                                                                                  | 1.096196593 | 1           | 1.027079557 | 0.769405805 |             |   |
| 1.003221248 | 0.786462603                                                                                                                                                 | 0.845115738 | 0.825713448 |             |             |             |   |
| YOR069W     | YOR069W::VPS5::vacuolar Protein Sorting Defective; Golgi retention and vacuolar protein sorting                                                             |             |             |             |             |             |   |
| 1           | 1.296133849                                                                                                                                                 | 1.222800748 | 1.39358482  |             |             |             |   |
| 1.385214366 | 1                                                                                                                                                           | 1.352652373 | 1.179382774 | 1.270821222 | 1.297750853 | 1           |   |
| 1.035633605 | 1.337779305                                                                                                                                                 | 1.402540449 | 1.229177161 | 1           | 1.198048447 |             |   |
| 0.706594121 | 1.005783217                                                                                                                                                 | 1.283813257 | 1           | 0.958317945 | 0.957542224 |             |   |
| 1.262855288 | 0.933694478                                                                                                                                                 | 1           | 1.080512061 | 1.337704508 | 0.838504759 |             |   |
| 0.725567861 | 0.874133826                                                                                                                                                 | 1           | 1.135991264 | 1.447476748 | 1.447726045 |             |   |
| 0.888820738 | 1.293251267                                                                                                                                                 | 1           |             | 1.689060056 | 0.940572253 | 1.661588635 |   |
| 1.301248388 | 1.306430994                                                                                                                                                 |             |             |             |             |             |   |
| YCR076C     | YCR076C::YCR076C::molecular_function unknown                                                                                                                |             |             |             |             |             |   |
| 1           |                                                                                                                                                             |             |             |             |             |             |   |
| 1.4608743   | 1.546561472                                                                                                                                                 | 1.5767338   | 1           | 1.297979246 | 1.434721486 |             |   |
| 1.896907885 | 1.91269297                                                                                                                                                  | 1           | 1.236056648 | 1.459441118 | 2.091222275 |             |   |
| 1.973004272 | 1                                                                                                                                                           |             | 1.474566998 | 1.597434597 | 0.802111075 |             |   |
| 0.647448797 |                                                                                                                                                             | 0.994727633 | 1           | 1.154215497 | 1.291008129 |             |   |
| 1.22888686  | 1.130704385                                                                                                                                                 | 1           | 0.987480758 | 0.911844286 | 0.990858296 |             |   |
| 1.164133785 | 1.279868365                                                                                                                                                 | 1           | 1.065781174 | 1.003245925 | 1.105351393 |             |   |
| 0.961942585 | 1.155079342                                                                                                                                                 | 1.209236781 |             |             |             |             |   |



YML048W YML048W::GSF2::Glucose Signaling Factor 1 1.662926837  
1.515850392 1.538615962 1.423409083 1 1.635160676 1.66124465  
1.553120403 1.320502057 1 1.781889334 1.842318175 1.83395635  
1.313378444 1 1.466619273 1.040763771 1.538364432 0.959478857 1  
1.059170317 0.775999267 1.171889715 0.756029305 1 1.101627955  
1.20766957 1.494338554 1.357660027 0.978768371 1 1.005923578  
1.092956593 1.048525016 0.649778462 0.463940969 1 0.984108228  
0.90007067 0.98253838 0.822535012 0.719324521 0.927285829  
YOR083W YOR083W::WHI5::whiskey (whi) mutant 1 1.578865161 1.232070714  
1.532835492 1.40317269 1 1.58942502 1.381326468 1.329688484 1  
1.192303753 1.201161149 1.106434947 1.472863871 1  
0.718526203 0.770790166 1 1.255066979 1.304519186 1.072491254 1  
0.93615568 0.93600877 1.18254681 1.072038435 1.036211921 1  
0.974671133 0.644853844 0.838663811 1 0.825490493  
0.777318005 0.627197895 1.074924457 0.839959426 1.002589463  
YCR079W YCR079W::YCR079W::protein phosphatase 1 1.438723148  
1.447985438 1.743174421 0.892540598 1 1.721839533 1.67352194  
1.417825883 1.419191644 1 1.742396417 1.754669301 1.660082148  
1.593962606 1 0.7556268  
0.478338957 1 1.069564471 1.021397243 1.211625816 1.111496005  
1.031943815 1 1.098384969 0.81384447 1.123072907 0.995410429  
0.858980137 1 1.232181465 0.722862238 1.026633405 0.62426006  
1.338945201 0.830091564  
YML050W YML050W::YML050W::molecular\_function unknown 1 0.984440618  
1.121418632 1.044241636 1.568730405 1 1.059608041 1.014620635  
1.152118121 1.567095323 1 0.98979703 0.946001083 1.324902461  
1.071269033 0.517478091 0.405985816 0.565926581 0.683523615 1  
1.103579567 1.722733503 1.28819461 1 1.068546269 1.095533115  
0.995026989 1 0.576592338 0.549840581 0.50203169  
0.803246393 1 0.923318177 1.060450478  
YCR081w YCR081w::SRB8::activation mediator subcomplex of RNA polymerase I  
holoenzyme 1 1.229768624 1.249593022 1.324505338 1.247531198 1  
1.246976357 1.24631095 1.14987372 1.171065626 1 1.36349533  
1.363708785 0.933991354 1.218259939 1 1.604741181 1.574269067  
1.073081475 1.005636752 1 1.184321059 1.657513339 0.882049526 1  
0.869610705 0.959335714 1.129611465 1.054643679 1.157878276 1  
0.980787901 1.407548065 0.98885587 1.235959606 1.279310446 1  
0.862225306 1.15306955 1.016719513 1.25734138 1.298331901 1.000838238  
YML053C YML053C::YML053C::molecular\_function unknown 1 1.946113167  
2.629730357 2.212243268 2.916297826 1 2.283449025 2.394763815  
3.007627366 2.711821805 1 1.942729286 2.869290525 3.697233275  
2.521291282 1 0.968554716 0.782175193 0.736222103 0.765633416 1  
1.279310494 1.340528736 2.038052186 1.387345318 1 0.899539384  
0.894225013 0.528549828 1.105944716 1 1.137654941 1.150119084  
1.177281694 1.478604718 1.895974645 1 1.234044714 1.143475206  
1.439242299 2.033150756 1.065634415  
YCR095C YCR095C::YCR095C::molecular\_function unknown 1 1.218991188  
1.51953204 1.303329795 1.382047376 1 1.141718889 1.032738961  
1.54808315 1.367135424 1 1.083568433 1.235817798 1.152049163  
1.318454042 1 0.798583151 0.943686829 0.470323484  
0.54457264 1 0.773010866 0.855384218 0.722519442  
0.646018545 0.92846752 1 1.105783569 1.233398027 0.987213369  
1.935268516 1 1.183260425 1.143874613 1.113557944 1.100924366  
1.217245807 1.215366122  
YML069W YML069W::POB3::binds to catalytic subunit of DNA polymerase alpha  
(Pol1p) 1 0.77243093 0.866938793 1.078780295 1.002294635 1  
0.993154066 0.939708173 0.828873049 0.860254574 1 0.745713924

1.028866217 0.765001705 0.954873389 1 1.334172591 0.867451994  
0.831604038 0.897154496 1 1.119991621 0.69710358 0.52763832  
0.828946418 1 0.902473141 1.081338547 1.113072539 0.894997228  
1.021239192 1 1.321800348 0.990840475 1.16540602 0.973224028  
0.793147267 1 1.196199 1.006770268 0.956173145 1.013118342  
0.729853131 0.747782872  
YCR097wa YCR097wa::YCR097W-A::molecular\_function unknown 1 1.908321952  
2.021499369 1 1.966583935 1.909888992 1.877747851 1  
1.863957998 1.638753861 1 1.713032476 1.354660395  
1.201993376 2.181275562 1 1.960515005 3.384005391 2.878821434  
1.459146844 0.734972077 0.740618918 1  
1.236103902 1.761425139 1.272755321 2.009292443 3.234595143 1  
1.05928714 1.529455709 1.657873333 2.041137096 2.473711901 0.656718  
YML071C YML071C::COG8::<b><u>C</u></b>onserved <b><u>O</u></b>ligomeric  
<b><u>G</u></b>olgi complex <b><u>8</u></b><br> dependent on RIC1 1  
0.740460671 0.901394309 0.96234518 1.063443699 1 0.89222182  
1.251119984 0.904090321 0.916457251 1 0.742582414 0.922846186  
0.744204878 1.037635824 1 1.144863643 0.876004696 1  
1.26242809 1 1.004358608 1.027113957 0.993605734  
1.084055673 1.198713357 1 0.850642923 0.764565968 0.653646957  
0.748605025 0.902704124 1 0.913964786 0.90860516 0.897846288  
1.117178686 0.818155885 0.795942198  
YCR098c YCR098c::GIT1::permease involved in the uptake of  
glycerophosphoinositol (GroPIIns)  
1 1.116552405 1.133336888 1.167850974  
0.994698081 0.983907159 1 0.860347103 1.118675728 0.907356917  
0.923869485 1.539737959 1 1.355232406 1.265476821 1.19479153  
1.38629143  
YCR100C YCR100C::YCR100C::molecular\_function unknown 1 1.216822209  
1.125439507 1.451629139 0.886465729 1 1.339012976 1.396529547  
1.011399164 0.953007589 1 1.475487827 0.92468757 1.177414752 1  
2.063797248 1.576734569 0.561128486 1  
0.862137248 0.873891366 0.919816346 1.05071805 1.142071952  
0.948773809 0.716828298 1 1.264408572  
0.215612434 1.90695562 0.679484244  
YCR102C YCR102C::YCR102C::molecular\_function unknown 1 1.239228304  
1.278620411 1.252756585 0.780790265 1 1.390971156 1.254078342  
1.434169044 1.094081183 1 8.805792097 13.94194402 4.074752315 1  
8.674795607 12.20175926 7.247520939 2.568223076 1 5.302197957  
1.650935009 1.257356975 0.862775097 1 1.72699409 2.156294182  
1.926423615 1.067964978 0.949322044 1 3.275626664 4.04472707  
2.003284201 0.872751206 0.681170376 1 2.410552676 3.61296087  
2.106773643 0.727024063 0.893801377 2.102373244  
YCR104w YCR104w::PAU3::member of the seripauperin protein/gene family (see  
Gene\_class PAU) 1 1.196215564 1.319089047 0.963019113 1.377739222 1  
1.078876262 0.980189824 1.519252357 1.359624933 1 1.236971188  
1.285515726 2.026529764 1.187292579 1 1.60868606 1.363095931  
1.6033418 1.599985047 1 1.324009842 2.40055723 1.970702521  
0.991995437 1 0.954099543 0.984324426 0.92117971 0.787491483  
0.944092113 1 0.874272324 1.585529823 1.283959127 1.375313363  
1.799854602 1 1.061838558 1.313117391 1.101371783 1.64809887  
1.347337347 1.53496889  
YOR085W YOR085W::OST3::Catalyzes the transfer of oligosaccharide from  
dolichol-oligosaccharide donor to consensus glycosylation acceptor sites  
(asparagines) in newly synth. proteins - ER lumen; may enhance oligosacch.  
transfer to subset of acceptor substrates 1 1.237120205 0.982459995

|             |                                                                                                                                                                                               |             |             |             |             |
|-------------|-----------------------------------------------------------------------------------------------------------------------------------------------------------------------------------------------|-------------|-------------|-------------|-------------|
| 1.195923363 | 1.229041965                                                                                                                                                                                   | 1           | 1.172606493 | 1.074268309 | 0.827299174 |
| 1.096075247 | 1                                                                                                                                                                                             | 1.282599215 | 0.986098548 | 1.195267019 | 1.051752868 |
| 1.404490381 | 1.04754856                                                                                                                                                                                    | 1.316833828 | 0.969690702 | 1           | 0.392053089 |
| 0.74331345  | 0.432896768                                                                                                                                                                                   | 0.350955999 | 1           | 1.10227841  | 0.905572323 |
| 0.76650402  | 1.178595377                                                                                                                                                                                   | 0.623032326 | 1           | 0.965527889 | 1.270250785 |
| 1.513206549 | 1.038709421                                                                                                                                                                                   | 0.787080459 | 1           | 0.810094594 | 0.773855434 |
| 0.859709937 | 0.670577185                                                                                                                                                                                   | 0.908022036 |             |             |             |
| YOR087W     | YOR087W::YVC1::vacuolar cation channel                                                                                                                                                        | 1           |             |             | 1.21516112  |
| 1.102243353 | 1.123587006                                                                                                                                                                                   | 0.938218338 | 1           | 1.267791767 | 1.160596068 |
| 0.95702986  | 1                                                                                                                                                                                             | 1.049710803 | 1.082981259 | 1.166843844 | 0.939271932 |
| 1.21577395  | 0.99763056                                                                                                                                                                                    | 1.131646961 | 1.280119903 | 1           | 0.860029146 |
| 0.968998788 | 0.87391278                                                                                                                                                                                    | 0.605235306 | 1           | 1.006645943 | 0.809310591 |
| 0.833840173 | 0.965197331                                                                                                                                                                                   | 0.975334903 | 1           | 0.914411998 | 0.651729291 |
| 0.855717706 | 0.92232584                                                                                                                                                                                    | 0.603830075 | 1           | 0.821698409 | 0.885072762 |
| 0.898560193 | 1.190937081                                                                                                                                                                                   | 0.795996105 | 0.980698884 |             |             |
| YOR089C     | YOR089C::VPS21::Rab5-like GTPase involved in vacuolar protein sorting and endocytosis post vesicle internalization; geranylgeranylated; geranylgeranylation required for membrane association | 1           |             |             | 0.740044624 |
| 1.136195142 | 0.894326275                                                                                                                                                                                   | 1.338662427 | 1           | 1.052729404 | 0.995858313 |
| 1.117607972 | 1.575716846                                                                                                                                                                                   | 1           | 0.721265158 | 0.869575057 | 1.253803688 |
| 0.991285256 | 1                                                                                                                                                                                             | 1.00204214  | 0.811013294 | 0.846759361 | 1.423794939 |
| 1.908208716 | 1.728735014                                                                                                                                                                                   | 1.977440199 | 1.490241908 | 1           | 1.10554052  |
| 1.280010084 | 0.971166933                                                                                                                                                                                   | 0.862749527 | 1.255271578 | 1           | 1.953030351 |
| 1.903303702 | 1.653652352                                                                                                                                                                                   | 2.041501739 | 1           | 0.928930084 | 1.100669277 |
| 0.891971977 | 1.297522079                                                                                                                                                                                   | 0.868713498 | 1.047246286 |             |             |
| YML074C     | "YML074C::FPR3::binds the immunosuppressant drugs, FK506 and rapamycin, and is localized to the nucleolus; binds to nuclear localization signal-containing peptides in vitro"                 | 1           |             |             | 1.026146658 |
| 0.976109373 | 1.335054198                                                                                                                                                                                   | 1           | 1.178779022 | 1.122805393 | 1.123707413 |
| 1.181110829 | 1                                                                                                                                                                                             | 0.931146785 | 1.099177095 | 1.03466001  | 1.108139842 |
| 0.844317521 | 0.520680528                                                                                                                                                                                   | 0.556825156 | 0.633948349 | 1           | 1.215166524 |
| 1.110460371 | 1.127120213                                                                                                                                                                                   | 1           | 0.885694091 | 0.992117079 | 0.904299525 |
| 0.801640028 | 0.841385542                                                                                                                                                                                   | 1           | 1.082712076 | 1.26234206  | 1.010138867 |
| 1.085791764 | 1.143478927                                                                                                                                                                                   | 1           | 0.853299892 | 1.022176623 | 0.790506984 |
| 1.095625372 | 0.697640889                                                                                                                                                                                   | 1.202231775 |             |             |             |
| YOR091W     | YOR091W::YOR091W::molecular_function unknown                                                                                                                                                  | 1           |             |             | 1.214619254 |
| 1.588201332 | 1.185251784                                                                                                                                                                                   | 1.850957229 | 1           | 1.367203305 | 1.387657421 |
| 1.47957     | 1                                                                                                                                                                                             | 1.005003021 | 0.945770869 | 0.896581221 | 1.097042852 |
| 0.48045338  | 0.270203129                                                                                                                                                                                   | 0.173970532 | 0.621954419 | 1           | 1.081362645 |
| 1.186836038 | 0.912507708                                                                                                                                                                                   | 0.911176379 | 1           | 0.895695099 | 0.708536152 |
| 0.724260508 | 0.71572357                                                                                                                                                                                    | 0.902236227 | 1           | 1.101064758 | 0.982694454 |
| 0.890720955 | 1.144916131                                                                                                                                                                                   | 1.183058943 | 1           | 0.673296178 | 0.583096026 |
| 0.935113299 | 0.866177675                                                                                                                                                                                   | 0.525069126 | 0.876499665 |             |             |
| YML076C     | YML076C::WAR1::ORF                                                                                                                                                                            | 1           |             |             | 0.704649163 |
| 0.739966898 | 1                                                                                                                                                                                             | 0.852844474 | 0.923407736 | 0.641875056 | 1           |
| 0.941474011 | 0.781837573                                                                                                                                                                                   | 0.459921243 | 0.695732822 | 1           | 0.622475236 |
| 0.615871541 | 1.136806803                                                                                                                                                                                   | 0.806226299 | 1           | 1.639976611 | 2.130552786 |
| 1.890892246 | 1.39924701                                                                                                                                                                                    | 1           | 0.802413052 | 0.957120664 | 0.871084663 |
| 0.942023142 | 0.862868776                                                                                                                                                                                   | 1           | 0.999865236 | 0.685603447 | 0.681296968 |
| 0.850628032 | 0.839003912                                                                                                                                                                                   | 1           | 0.88237651  | 0.746266733 | 0.891170028 |
| 0.71529001  | 0.900106192                                                                                                                                                                                   | 0.813454714 |             |             |             |
| YOR093C     | YOR093C::YOR093C::molecular_function unknown                                                                                                                                                  | 1           |             |             | 1.509220261 |
| 1.388783925 | 1.600415099                                                                                                                                                                                   | 1.527760405 | 1           | 1.553790274 | 1.760302884 |
| 1.406781122 | 1                                                                                                                                                                                             | 1.432708743 | 1.283292138 | 1.124761134 | 1.604028834 |
| 0.737761013 | 0.735835643                                                                                                                                                                                   | 0.927355421 | 1           | 0.83803739  | 1.891142865 |
| 1.151302013 | 0.931268959                                                                                                                                                                                   | 0.83204249  | 0.703186876 | 0.838665084 |             |
| 1.047774867 | 1                                                                                                                                                                                             | 0.665265955 | 0.554195176 | 0.646199271 | 0.979932711 |

|         |                                                                                                               |             |             |             |             |             |             |   |
|---------|---------------------------------------------------------------------------------------------------------------|-------------|-------------|-------------|-------------|-------------|-------------|---|
|         | 0.758860097                                                                                                   | 1           |             | 0.727635935 | 0.876671208 | 0.905087075 | 0.931189068 |   |
|         | 0.917653933                                                                                                   |             |             |             |             |             |             |   |
| YOR107W | YOR107W::RGS2::Regulator of G-protein Signalling for gpa2; belongs to the RGS protein family and acts on Gpa2 |             |             |             |             |             |             |   |
|         | 1.266944512                                                                                                   | 1.537881122 | 1           | 1.571696225 |             | 1.554701187 | 1           |   |
|         | 1.538096788                                                                                                   | 1.189596298 | 1.173685522 | 1.199653905 | 1           | 0.798492735 |             |   |
|         | 0.467963751                                                                                                   | 0.802671693 |             | 0.523875136 | 0.513262511 | 0.370731845 |             | 1 |
|         | 1.02309497                                                                                                    | 0.928126708 | 0.89771067  | 0.973851724 | 0.878650138 | 1           |             |   |
|         | 0.576418278                                                                                                   | 0.61047686  | 0.539937152 |             | 0.868788692 | 1           | 0.755201957 |   |
|         | 0.703085417                                                                                                   | 0.876657419 | 1.1341933   | 0.953373605 | 0.817832829 |             |             |   |
| YML078W | YML078W::CPR3::cyclophilin-3 (cyclosporin-sensitive proline rotamase-3)                                       |             |             |             |             |             |             |   |
|         | 0.974021344                                                                                                   | 1.226714877 | 1.225935616 | 0.837680318 | 1.417180114 | 1           |             |   |
|         | 1.21421411                                                                                                    | 1.878857765 | 0.918477832 | 1           | 1.145097897 | 0.85671294  |             |   |
|         | 1.194911595                                                                                                   | 1.39114499  | 1           | 1.428294506 | 1.614442188 | 1.904533    |             |   |
|         | 1.764037145                                                                                                   | 1           | 1.264729363 | 1.319709853 | 1.692098157 | 1.283785117 |             |   |
|         | 1.015876111                                                                                                   | 1           | 1.387896303 | 1.850399625 | 1.764160267 | 1.275970746 |             |   |
|         | 1.646586542                                                                                                   | 1           | 1.244795324 | 1.570578192 | 1.162549447 | 1.492192557 |             |   |
|         | 1.05237906                                                                                                    | 1.45266025  |             |             |             |             |             |   |
| YOR109W | YOR109W::INP53::Synaptojanin-like protein 1                                                                   |             |             |             |             |             |             |   |
|         | 1.537661563                                                                                                   | 1.564862226 | 1.663984279 | 1           | 1.609439288 | 1.581497274 |             |   |
|         | 1.349105598                                                                                                   | 1           | 1.519830713 | 1.519786473 | 1.563865079 | 1.317469672 | 1           |   |
|         | 1.009075746                                                                                                   | 0.577561091 | 0.684264404 | 1.220646796 | 1           | 1.245368181 |             |   |
|         | 1.100237198                                                                                                   | 1.057635755 | 1.263099802 | 1           | 0.953914093 | 0.992162814 |             |   |
|         | 1.040013248                                                                                                   | 1.110255918 | 1           | 0.858740997 | 0.894258929 | 0.961434295 |             |   |
|         | 0.921446438                                                                                                   | 0.842997649 | 1           | 0.904742931 | 0.95437531  | 0.831123823 |             |   |
|         | 1.049775105                                                                                                   | 0.896251326 | 1.027106933 |             |             |             |             |   |
| YML080W | YML080W::DUS1::tRNA dihydrouridine synthase                                                                   |             |             |             |             |             |             |   |
|         | 0.777006332                                                                                                   | 0.979958185 | 1.088113044 | 1           | 0.826069944 | 0.815992051 |             |   |
|         | 1.338127958                                                                                                   | 1.372089188 | 1           | 0.546091112 | 0.382061538 | 0.404873035 |             |   |
|         | 1.169123933                                                                                                   | 1           | 0.177874987 | 0.221095518 | 0.311355522 | 0.530911073 | 1           |   |
|         | 0.467719241                                                                                                   | 1.025741828 | 0.704283861 | 0.684144536 | 1           | 0.775102038 |             |   |
|         | 0.628621854                                                                                                   | 0.626676355 | 0.886879372 | 0.886255428 | 1           | 0.683243178 |             |   |
|         | 0.908705062                                                                                                   | 0.585062175 | 0.984031208 | 0.969225065 | 1           | 0.643325451 |             |   |
|         | 0.874704459                                                                                                   | 0.90722112  | 1.222389976 | 0.637915534 | 0.983325775 |             |             |   |
| YOR111W | YOR111W::YOR111W::molecular_function unknown*                                                                 |             |             |             |             |             |             |   |
|         | 1.222998429                                                                                                   | 1.381160287 | 1.58335915  | 1           | 1.108860386 | 1.098715627 |             |   |
|         | 1.447310705                                                                                                   | 1           | 0.92277135  | 1.090100037 | 1.224583807 | 1.228347295 | 1           |   |
|         | 1.155414031                                                                                                   | 1.056255311 | 0.952625245 | 1.112191772 | 1           | 1.553428461 |             |   |
|         | 0.992004218                                                                                                   | 1.108937738 | 1.276135201 | 1           | 1.13873302  | 1.495618515 |             |   |
|         | 1.447326434                                                                                                   | 1.354370356 | 1.590344844 | 1           | 1.230471673 | 1.146658174 |             |   |
|         | 1.47916926                                                                                                    | 1.368834217 | 0.639840223 | 1           | 0.906519569 | 0.645707505 |             |   |
|         | 0.933986585                                                                                                   | 0.758578897 | 0.844698213 | 1.164579958 |             |             |             |   |
| YCRX11W | YCRX11W                                                                                                       |             |             |             |             |             |             |   |
|         | 1.629813453                                                                                                   | 1.527905733 |             | 0.745061672 | 1           | 1.527874012 | 1.420363084 |   |
|         | 0.567017418                                                                                                   | 1.064796185 | 1           | 0.652369792 |             | 1           |             |   |
|         | 0.441927127                                                                                                   |             | 0.38093978  | 1           | 0.938208606 | 0.752504684 |             |   |
|         | 1.286746624                                                                                                   | 1.08308438  | 0.822772898 | 1           | 0.952626214 | 0.597226681 |             |   |
|         | 0.696359036                                                                                                   | 0.66872039  | 0.308659172 | 1           | 0.646064754 | 0.825040043 |             |   |
|         | 0.822280553                                                                                                   | 0.459241899 | 1.107570994 | 0.512240021 |             |             |             |   |
| YML097C | "YML097C::VPS9::Required for Golgi to vacuole trafficking, shares similarity to mammalian ras inhibitors"     |             |             |             |             |             |             |   |
|         | 0.915473543                                                                                                   | 1.00049648  | 1           | 0.943683955 | 0.930883003 | 1.233011692 | 1           |   |
|         | 0.987102041                                                                                                   | 0.843688728 | 0.879452412 | 1.109391235 | 1           | 0.734670458 |             |   |
|         | 0.538166641                                                                                                   | 0.59015816  | 0.911206703 | 1           | 1.299983106 | 1.959031737 |             |   |
|         | 1.707641678                                                                                                   | 1.238242419 | 1           | 0.82452254  | 0.838116659 | 0.716039567 |             |   |
|         | 0.720460396                                                                                                   | 0.977366062 | 1           | 0.890555966 | 0.990352286 | 0.705849186 |             |   |

0.901299359 1.0226313 1 1.080537158 1.107558382 1.179317708  
 1.174730293 0.995997154 1.080519988  
 YOR113W "YOR113W::AZF1::probable transcription factor, asparagine-rich zinc-  
 finger protein, suppressor of mutation in the nuclear gene for the core subunit  
 of mitochondrial RNA polymerase" 1 1.199593915 1.233118409 1.198893704  
 1.26219086 1 1.251684214 1.116636387 1.082160357 1.207133714 1  
 1.190558483 1.309116333 1.393718911 1.290726693 1 1.040234976  
 0.807873831 1.145095458 1.455587283 1 1.373286387 1.725458547  
 1.443298219 0.853535528 1 1.309089251 1.113096501 1.205707489  
 1.76268438 1.334528775 1 0.869527117 1.15198893 1.220785727  
 0.665241433 0.747627696 1 0.815998732 1.151436903 1.031080146  
 1.240228299 0.958475325 1.065634415  
 YCRX13w YCRX13w 1 1.689772251 1.743350205 1.515650417 1.624084118 1  
 1.361084926 1.476876954 1 1.266331181 1.681611448  
 1 1.575325133 1  
 1.220724971 1.197163547 1.514950718 1.111741559 1.043705741 1  
 1.178368537 1.08930182 0.779867021 0.826767788 0.813098159 1  
 1.176579395 0.990942274 1.048679536 0.945480345 0.937222947 1.168958073  
 YML099C YML099C::ARG81::Regulator of arginine-responsive genes with ARG80  
 and ARG82 0.933315566 0.990771665 1.219897242 0.825270862  
 1.107816146 1.278516686 1.114308207 1.142381961 1.036843537  
 0.993196274 0.91615572 1.080803829 1 0.685647113 0.628619191  
 0.671950333 1 0.807212952 0.936462484 0.941631668 1  
 0.831596853 0.824546297 0.89426654 0.966534977 0.99495585 1  
 0.940230948 0.707636037 0.868277739 0.606379346 1 0.853501323  
 0.814568258 1.045237987 0.704978255 0.754318922 0.95705708  
 YOR115C YOR115C::TRS33::Trapp subunit of 33 kDa 1 0.871643734  
 1.005127214 0.981203733 1.360197494 1 0.817739863 0.813257061  
 1.145211794 1.185436331 1 0.734704936 0.910987159 1.03019605  
 1.158378923 1 0.095391764 0.682746865 0.862009745 1.277220142 1  
 1.089196143 1.11484496 1.581970596 1.43974602 1 1.049553541  
 1.352212801 1.178016765 0.936962325 1.438431151 0.912909451  
 1.453129051 1.263384758 1.119535319 1.283660078 1 1.092038042  
 1.131765162 0.997237872 1.747243925 1.25396905 1.409754653  
 YCRX15W YCRX15W 1 1.120657026 1.12972613 1.362293394 0.759008154 1  
 1.317669968 1.39110786 1.166053138 1.105325691 1 0.888296231  
 1.522973321 1.31961649 1.3636496 1 0.884726195 0.9241095  
 0.744835125 0.626321832 0.811827006 0.253302217 1  
 0.991588354 0.942357188 1.04188457 1.107184796 1.019047539 1  
 0.985751285 0.738783045 0.786898154 1.166239567 0.619925786 1  
 0.832885348 0.641415251 0.898601513 0.37279193 0.821254539 0.648837381  
 YML101C YML101C::CUE4::Hypothetical ORF 1 1.102766694 1.430667352  
 0.893898575 1.344011855 1 0.982468054 1.033911191 1.216944442  
 1.306315474 1 1.323285669 1.392360474 1.976584557 1.053340807 1  
 1.567250609 0.793284712 1.063758595 0.801184625 1 1.551417637  
 2.352155496 1.24784784 0.852211955 1 1.039612881 1.263987872  
 1.364241108 1.306957836 1.030127987 1 1.09809372 0.99418279  
 1.128129077 1.302587797 1.247340021 1 0.869848479 1.062599918  
 1.284501639 1.259783333 0.935068531 0.976320768  
 YCRX17W YCRX17W 1 1.114584746 1.392390689 0.943184416 0.896064695 1  
 1.201904963 1.346647307 1.02550714 1 1.225245875 1.51747072  
 2.43151773 0.904868147 1 1.183181656 1.294830536 1.412775974 1  
 1.155718527 1.580899295 1.517083367 1.266718974 1 1.093112122  
 0.938944957 1.294600177 0.993886039 0.827503166 1 0.893437094  
 1.374782474 0.924548285 1.257414226 1.384805686 1 0.984903125  
 1.225764124 1.267104862 1.002518412 1.542927473 1.03761439

YML103C YML103C::NUP188::Localized at both the cytoplasmic and nucleoplasmic faces of the nuclear pore complex (NPC); may form the octagonal core structure of NPC  
1.119239858 0.896249767 0.840934398 1.155034507  
0.929231189 0.897011442 0.906635233 1.012235187 0.751387946  
0.252624231 1  
1.169830101 0.957705414 0.870826225 1 0.739008344  
1.056150627 0.912940632 0.851005466 1 0.716964201  
0.912590676 0.908467584 0.798897519 1.225873579  
YCRX19W YCRX19W 1 0.924106897 0.903957758 1.268358837 0.826468744 1  
1.073395105 1.146977165 0.96099941 0.890843085 1 0.972200201  
0.538012098 1.059348179 0.551494889  
1 0.740684744 0.772414191 0.883611317 0.955759789 1  
1.083223067 1.010759246 1 0.876438279 0.603538125  
1.13174778 0.645545818 1.13111959 0.830091564  
YML105C "YML105C::SEC65::signal recognition particle subunit, homologue of mammalian SRP19" 1 0.96715764 1.118718996 0.86611932 1.23286294 1  
0.867166701 0.842117224 1.309460103 1.201223882 1 0.723970561  
0.885232418 0.890146348 1.106984396 1 1.117493781 0.741857972  
0.643039711 1.08985569 1 2.070083802 1.823676761 1.686217979  
1.441127189 1 1.060905064 1.197670825 0.895276728 0.834208229  
0.94127311 1 0.966128364 1.115835702 0.950001608 0.92730424  
1.537595871 1 0.992814067 1.136473044 0.973837421 1.283351107  
1.378232177  
YCRX21C YCRX21C 1 1.548712724 1.518770847 1.31540131 1.473994983 1  
1.361610233 1.245421961 1.490100441 1.673038544 1 4.045337002  
4.988986307 2.647841584 1.493944313 1 3.416158344 4.265661405  
4.110647593 3.419994003 1 3.67447164 5.180647721 4.030855711  
2.438051375 1 2.267760767 4.292269243 5.147198706 1.360056272  
1.176837666 1 2.030283831 5.966636347 6.212154504 5.131824367  
2.085261516 1 3.389690718 5.832584995 4.003505791 1.445561462  
1.27207859 1.563864476  
YML107C YML107C::YML107C::molecular\_function unknown 1 0.870591565  
0.856888274 1.367610141 0.943235328 1 1.000434572 0.884419478  
2.086212237 1.637061847 1 0.674327638 0.857257031 1.137010591  
1.387503827 1 0.36450596 1.987580042 2.340760488 0.417816301 1  
0.509735121 0.451484465 0.28713591 0.26209983 1 1.162595198  
1.375537361 1.335466079 2.607714508 1.657090916 1 0.932796038  
0.348976453 0.64856288 1.241126864 0.334985396 1 0.470539859  
0.358951661 0.385718116 0.33706296 0.441798404 0.375642687  
YDL014W YDL014W::NOP1::part of small (ribosomal) subunit (SSU) processosome (contains U3 snoRNA) 1 1.548120947 1.007866064 0.874319871 0.845520945 1  
1.082265339 0.971103802 0.913608689 0.903884067 1 1.244829974  
0.63533875 0.515019983 0.790734796 1 0.603421799 0.314506107  
0.368652397 0.466320271 1 0.742654838 0.484550483 0.526760176  
0.788047176 1 0.905393122 0.691374061 0.660951359 1.087335626  
0.829039512 1 0.687290494 0.502134566 0.391516055 0.648889494 1  
0.728466951 0.541113018 0.570596065 0.833712768 0.558895994 0.819584055  
YDL016c YDL016c::YDL016C::molecular\_function unknown 1 2.048753026  
1.863860794 1.222557535 2.240804426 1 1.350590275 1.187853487  
1.796214276 1.774647809 1 1.412664302 1.313205665 2.12748597  
1.257143672 1 1.32338484 0.881468715 1.176181387 1.767602532 1  
1.23673915 3.320554899 1.466569369 0.815629553 1 0.837260437  
0.711466835 0.527791563 0.612195766 0.838907791 1 1.145657361  
1.53522022 0.873928589 0.769415355 1.691873185 1 1.403426244  
1.64549997 1.139634889 2.465513391 1.625998226 1.398371531  
YDL018c YDL018c::ERP3::Emp24p/Erv25p related protein 2 1 1.021264495  
1.320185717 1.098263025 1.468457776 1 0.95576345 1.005595182

|             |                                                                                                                                               |             |             |             |             |   |
|-------------|-----------------------------------------------------------------------------------------------------------------------------------------------|-------------|-------------|-------------|-------------|---|
| 1.439594484 | 1.242535395                                                                                                                                   | 1           | 0.931273068 | 1.051734599 | 1.183211926 |   |
| 1.2488676   | 1                                                                                                                                             | 1.619099973 | 1.112826265 | 2.543334846 | 1           |   |
| 2.478566996 | 2.146305291                                                                                                                                   |             | 2.015907248 | 1           | 1.2350109   |   |
| 1.262537562 | 0.973277923                                                                                                                                   | 1.145786965 | 1           | 1.094323287 | 1.577807613 |   |
| 1.279143702 | 1.234055073                                                                                                                                   | 1.597890694 | 1           | 1.426476081 | 1.480042994 |   |
| 1.413527259 | 1.742557884                                                                                                                                   | 1.451243563 | 1.120798695 |             |             |   |
| YDL020C     | YDL020C::RPN4::Involved in ubiquitin degradation pathway. May act as common transcription factor on proteasomal and proteasome-related genes. |             |             |             |             | 1 |
| 0.690425873 | 0.893461137                                                                                                                                   | 0.853196632 | 0.725165274 | 1           | 0.846693488 |   |
| 0.865236468 | 1.004688401                                                                                                                                   | 0.614827935 | 1           | 1.084161038 | 1.379123827 |   |
| 0.871192639 | 0.818751669                                                                                                                                   | 1           | 2.18090766  | 1.840938368 | 1.953345023 |   |
| 2.188881326 | 1                                                                                                                                             | 2.520000751 | 2.343586374 | 2.675607952 | 2.355519358 |   |
| 1.564614226 | 1.49387114                                                                                                                                    | 1.358948431 | 1.009462308 | 1.328777766 | 1           |   |
| 1.837288843 | 0.917218882                                                                                                                                   | 1.196613066 | 0.692063782 | 0.933383676 | 1           |   |
| 1.491845456 | 1.045785828                                                                                                                                   | 0.80237165  | 1.008182621 | 0.976793301 | 1.250391049 |   |
| YOR117W     | YOR117W::RPT5::Probable 26S protease subunit and member of the CDC48/PAS1/SEC18 family of ATPases                                             |             |             |             |             | 1 |
| 1.006551076 | 1                                                                                                                                             | 1.601409906 | 1.48573257  | 1.044611012 | 1.18674567  |   |
| 1.019645823 | 1.488617587                                                                                                                                   | 1.204535552 | 1.163489689 | 1           | 0.984488765 |   |
| 0.741898996 | 0.918278261                                                                                                                                   | 0.966467196 | 1           | 1.039259109 | 0.803655278 |   |
| 0.863012615 | 1                                                                                                                                             | 1.370956637 | 1.666844067 | 1.665730129 | 1.248514791 |   |
| 1.284430693 | 1                                                                                                                                             | 1.080079685 | 0.872806753 | 2.375512169 | 0.836619456 |   |
| 0.441266952 | 1                                                                                                                                             | 1.137483925 | 1.023441587 | 0.907019847 | 0.782306897 |   |
| 0.479366747 | 1.133057482                                                                                                                                   |             |             |             |             |   |
| YOR131C     | YOR131C::YOR131C::molecular_function unknown                                                                                                  |             |             |             |             | 1 |
| 1.06805306  | 0.826289766                                                                                                                                   | 1.143470751 | 1           | 0.815258245 | 0.861583183 |   |
| 1.16640287  | 1.053210784                                                                                                                                   | 1           | 0.833735169 | 1.052856499 | 1.324816702 |   |
| 1.001175111 | 1                                                                                                                                             | 0.596978594 | 0.835554275 | 1.197747662 | 1           |   |
| 1.892555787 | 1.817859328                                                                                                                                   | 2.191177188 | 1.266143506 | 1           | 0.818910936 |   |
| 1.442336665 | 0.863899707                                                                                                                                   | 0.672047348 | 1.134433277 | 1           | 1.972572534 |   |
| 0.981138565 | 1.523088502                                                                                                                                   | 2.10688004  | 1.208174451 | 1           | 1.400667457 |   |
| 1.207774774 | 1.102211305                                                                                                                                   | 1.502208077 | 1.243583519 | 1.103286232 |             |   |
| YOR133W     | YOR133W::EFT1::translation elongation factor 2 (EF-2)                                                                                         |             |             |             |             | 1 |
| 1.199638509 | 0.606336611                                                                                                                                   | 1.845767896 | 0.598131412 | 1           | 1.883674044 |   |
| 1.630989465 | 0.73002938                                                                                                                                    | 0.947628392 | 1           | 1.19437376  | 0.925515054 |   |
| 0.312362565 | 1.017912292                                                                                                                                   | 1           | 0.660581814 | 0.395696014 | 0.442883387 |   |
| 0.258744324 | 1                                                                                                                                             | 0.32776998  | 0.154530865 | 0.295945076 | 1           |   |
| 1.012821449 | 0.628171491                                                                                                                                   | 0.688833494 | 1.65054163  | 0.929384592 | 1           |   |
| 0.589716986 | 0.257206593                                                                                                                                   | 0.488524588 | 0.443153834 | 0.123489277 | 1           |   |
| 0.54565094  | 0.258299543                                                                                                                                   | 0.549266599 | 0.340544246 | 0.255512661 | 0.474588204 |   |
| YML121W     | YML121W::GTR1::Involved in the function of the Pho84 phosphate transporter                                                                    |             |             |             |             | 1 |
| 1.049928623 | 1.392161139                                                                                                                                   | 1.307313194 | 1           | 0.943757424 | 0.972574346 |   |
| 1.29610004  | 1.151673896                                                                                                                                   | 1           | 1.035669838 | 0.772599708 | 1.613724915 |   |
| 1.151334444 | 2.462940398                                                                                                                                   | 0.949401905 | 1           | 0.971245075 | 1.040872594 |   |
| 0.721996216 | 0.79269396                                                                                                                                    | 0.960852841 | 1.055279904 | 1.348464857 |             |   |
| 1.145045118 | 1.089976572                                                                                                                                   | 1.554172941 | 1           | 1.051404061 | 1.251912774 |   |
| 0.914998694 | 1.511196135                                                                                                                                   | 1.331681476 | 2.41234422  |             |             |   |
| YOR135C     | YOR135C::YOR135C::molecular_function unknown                                                                                                  |             |             |             |             | 1 |
| 0.939910112 | 1.211712295                                                                                                                                   | 0.839238939 | 1           | 1.233553307 | 1.093583064 |   |
| 0.674950321 | 1                                                                                                                                             | 1.02771724  | 0.981456517 | 0.748504148 | 0.792841276 |   |
| 0.943923578 | 0.953613274                                                                                                                                   | 1.142392308 | 0.94031441  | 1           | 0.963554051 |   |
| 0.380012246 | 1.309468695                                                                                                                                   | 1           | 0.950554567 | 0.987735388 | 1.97677584  |   |
| 1.253121928 | 1.089359462                                                                                                                                   | 1           | 1.033877082 | 0.948398403 | 1.261830581 |   |
| 2.650421548 | 0.322716021                                                                                                                                   | 1           | 0.915606717 | 0.598705969 | 1.245645311 |   |
| 0.603598074 | 1.337169975                                                                                                                                   | 0.600678055 |             |             |             |   |

YOR135C YOR135C::YOR135C::molecular\_function unknown 1 1.380740329  
1.190533592 1.427556603 0.826954528 1 1.293164847 1.408550566  
0.972008421 0.781108963 1 1.176994228 1.277248878 0.960611278  
0.91244366 1 1.045875232 0.79315363 1.476587361 1.054457047 1  
1.080062398 0.503527085 1.084796859 1.459791397 1 0.729470716  
0.789512104 1.810076321 0.88516968 1.041933571 1 1.023510652  
0.556307892 1.495309341 1.733694467 1 1.310524573 0.869173781  
1.609013151 0.893344337 1.459034858 0.707504217  
YOR137C YOR137C::SIA1::Suppressor of eIF5A 1 0.950060043 0.955433435  
1.271188874 1.00166616 1 1.122820368 1.137722413 0.839640945  
0.939075974 1 1.140938536 1.176880277 0.989001845 1.104740827 1  
1.601317624 1.329789442 1.037849665 1 1.4255383 1.980940709  
1.576562057 1.128816294 1 1.167579855 1.258981804 1.19176308  
1.104081709 1.151500949 1 0.918124446 0.705938387 1.27318354  
1.331431467 0.694402607 1 1.290657567 1.085470832 1.335943938  
1.779024001 0.849355305  
YML123C "YML123C::PHO84::inorganic phosphate transporter, transmembrane  
protein" 1 1.222169897 0.626090646 0.944819647 0.775299466 1  
0.949210951 0.834919084 0.728437365 0.902402218 1 0.762992596  
0.585243139 0.43070689 0.705225393 0.123785229 0.734465224  
0.993061214 1.009469503 1 0.483252048 0.865771615 0.703519641  
0.618601998 1 0.982667399 0.648886618 1.070489655 1.41222776  
1.049028572 1 0.594958507 0.617683457 0.712535219 0.65218185  
0.601265266 1 0.643434616 0.574704397 1.032219189 0.879113707  
0.551451102 1.06651008  
YOR139C YOR139C::YOR139C::molecular\_function unknown 1 0.982586668  
1.137189432 1.039057944 1.162597935 1 1.076782489  
1.168300988 1 1.030474296 0.987345682 1.013517535 1.202712 1  
0.691500558 0.681998311 1.067380426 1.10696687 1 1.077373409  
1.66063144 1.29797287 0.572875788 1 1.135081999 1.049490705  
1.169561391 1 0.667926359 0.641254847 1.075794161 1.024855481 1  
0.828463443 0.530144372 1.064322405 0.500319732 1.224076764  
YML126C YML126C::ERG13::involved in mevalonate synthesis 1  
1.178548351 0.68082533 0.880398208 0.623145502 1 1.05082345  
1.147621623 0.64981002 0.800422373 1 0.844547118 0.826970789  
0.579559982 0.608468403 1 0.820467493 0.570458927 0.764129453  
0.664028341 1 0.52336421 0.340492152 0.368908544 0.752097387 1  
0.816980785 0.695767577 1.048023978 1.134751384 0.735610387 1  
0.710229476 0.682959329 0.599932824 0.812074863 0.685356083 1  
0.798649623 0.556703947 1.050049243 0.76730331 0.681378499 1.084022543  
YML073C YML073C::RPL6A::Homology to rat L6 and human L6 1 1.134506838  
1.314566786 0.776727595 1.702136322 1 1.019480529 0.909032155  
1.167577601 1.174839562 1 0.740578919 0.723848794 0.72262806  
0.817284269 1 0.832701296 0.368035905 0.232454769 0.565708999 1  
1.188167621 1.13617745 0.553857613 0.804090981 1 1.1387373  
0.946723738 0.785401733 1.052432867 1.147521466 1 1.382568709  
1.388367009 1.20581011 0.762109614 1.959978906 1 1.099007391  
1.262552862 0.852932255 1.77722712 0.852487069 1.625158097  
YOR141C YOR141C::ARP8::actin-related protein 1 1.07977734  
1.16908561 1.585769382 1.083960628 1 1.463448057 1.360195441  
1.276793319 1 1.054141804 1.429881506 0.927466205 1.436818537 1  
1.24465596 1.28810744 0.533804567 1 0.596999225 0.275357743  
0.166166762 0.465193427 1 1.028652024 1.066234274 1.227921416  
1.432257097 1.273712542 1 0.96757097 0.551373582 0.925502984  
1.158136618 0.462698928 1 0.724197512 0.426098628 0.686703523  
0.404541444 0.990897337 0.885255897



YML128C YML128C::MSC1::Meiotic Sister-Chromatid recombination 1  
0.689635093 1.409837359 2.753580653 1.675402523 1 1.251293111  
2.577963915 2.797643896 2.92734009 1 1.034335881 2.367328098  
6.477526508 2.998379136 1 5.271401805 9.056551137 17.66184689  
8.628092979 1 3.532534204 5.867252827 13.62111951 6.962342059 1  
1.072524915 2.535769399 2.531432585 0.811208031 1.192316777 1  
1.394829888 2.341605988 5.603355279 3.949677722 1.68291924 1  
1.96225583 2.090379279 2.209878958 1.234212588 9.219139219 0.954430189  
YOR155C YOR155C::YOR155C::molecular\_function unknown 1 1.718001516  
1.783635937 1.880058656 1.851573854 1 1.729805373 1.73303087  
1.574565931 1 1.516448778 1.532810231 1.376470238 1.469648606 1  
0.939255531 1.043888586 0.664431133 1 1.053195547  
1 1.595705428 1.323777708 1.215813409 1.785623242 1  
1.23903382 1.10775618 1.074941671 0.866367301 1.593541251 1  
1.342240874 1.310724307 0.884836447 1.224401781 1.028943035 8.723842173  
YOR155C YOR155C::YOR155C::molecular\_function unknown 1 0.953172503  
1.137694039 1.146056516 1.372802652 1 1.057686933 1.268305337  
1.14030642 1.160105503 1 0.9724175 1.325415704 1.656361438  
1.097629373 1 1.904954987 1.563515599 2.012403018 1.517453528 1  
1.751051331 1.975057971 1.79395379 1.099169453 1 1.513900496  
1.556271307 1.177608917 1.34009276 1 1.04954142 1.20198573  
1.347687539 1.079618487 0.964315182 1 1.1561802 0.962539231  
1.107855947 0.796426832 1.337191364 1.172460524  
YDL022w YDL022w::GPD1::glycerol-3-phosphate dehydrogenase 1  
1.002747693 1.228345303 0.822581527 0.662613732 1 1.328915258  
1.833748046 0.529190819 1 1.669152698 1.84721166 1.987929479  
0.781333223 1 8.612009453 6.273679275 8.555042563 5.477774541 1  
3.15944586 2.766720826 3.145161975 2.065689774 1 1.520619584  
1.880248975 1.557632086 1.02744028 1.133024946 1 1.491966858  
1.250918039 2.273073549 0.901744308 0.59288726 1 2.026022152  
1.107284891 1.110837715 0.92273375 1.530997257 1.026231372  
YML130C "YML130C::ERO1::essential, FAD-dependent oxidase of protein  
disulfide isomerase" 1 0.822597737 0.856152914 0.864012191 0.758043538 1  
0.901443387 0.936266547 0.864928692 0.957418414 1 0.960727225  
0.988443482 0.93965596 0.709202802 1 1.337413037 1.019773839  
1.219729685 1.391080937 1 1.540207354 1.444709895 1.346705557  
2.016139149 1 1.22827433 1.452843765 1.624562335 1.099377496  
1.072736421 1 1.378507839 1.206381386 0.877735655 0.718849777  
0.675415339 1 1.234480127 1.248069347 0.981918446 0.973396527  
0.739004308 1.108540012  
YOR157C YOR157C::PUP1::putative proteasome subunit 1 1.282970967  
1.398672714 1.012493731 1.267273836 1 1.216769429 1.042629403  
1.125112407 1 1.030208367 1.412380393 1.763085899 0.860265553 1  
0.927060109 0.813134126 1.100614064 1.715571613 1 1.024993041  
1.051835523 1.377263909 1.20554851 1 1.023258501 1.27039283  
1.258300067 0.833656553 0.92018233 1 1.063072024 1.943956232  
1.636637561 0.969699701 1.207265073 1 1.130833946 1.384397668  
1.089432827 1.057548498 1.166304591 1.334451019  
YDL024c YDL024c::DIA3::involved in invasive and pseudohyphal growth 1  
1 1 1.299274632  
1.979763483 2.613020612 1 0.781344095 1.097886097 1.780199454 1  
0.833777556 1.358214505 0.818746004 0.646804681 1 1.386456395  
1.362290939 1.186852847 1.746258566 1.437601384 1 0.90071744  
0.511732587 0.821931675 1.192878745 0.517412368 1 0.626672914  
0.487947331 0.81034166 0.450492127 0.912756746 0.491225055  
YML132W "YML132W::COS3::Protein with strong similarity to subtelomerically-  
encoded proteins such as Cos5p, Ybr302p, Cos3p, Cos1p, Cos4p, Cos8p, Cos6p,

Cos9p (COS3 and YBR302C code for identical proteins)" 1 1.246492097  
 1.011513107 1.073322102 1.113630963 1 1.101297446 1.075507936  
 1.04641698 1.089911812 1 1.085050324 1.083229648 1.259278566  
 1.037175188 1 2.0280444 1.698646703 2.017950186 1.859694771 1  
 1.606365272 1.556331548 2.112427801 2.031037956 1 1.261036698  
 1.358121855 1.664624644 1.288482683 1.115850518 1 0.831950765  
 1.048225024 1.23287121 0.778514899 0.744118876 1 1.229055173  
 1.027777392 0.979069285 1.278981899 1.171306814 1.086649433  
 YOR159C "YOR159C::SME1::Required for pre-mRNA splicing, cap modification and  
 U1, U2, U4 and U5 snRNA stability" 1 1.987685623 1.833579983 2.011398491  
 2.130689023 1 2.005863559 1.605374625 1.692035892 1.77414029 1  
 1.624023255 1.606520522 1.586488648 1.565859967 1 0.846401515  
 0.428210778 1 0.979248878 0.900712144 1  
 0.863434498 0.755115771 0.708604295 0.914024517 0.976636141 1  
 1.194073865 1.358191605 1.322933266 1.068482756 1.253885465 1  
 1.560890598 1.653475978 0.710662615 4.252905658  
 YDL038c YDL038c::YDL038C::molecular\_function unknown 1 0.629256504  
 0.357768445 0.67960351 0.480697355 1 0.59213048 0.596216755  
 0.655004706 1 1.478513245 0.518330971 0.348843946 0.577326937 1  
 0.900402089 1.335591774 0.976894186 1 0.7597768 0.995336324  
 0.887268909 0.642704395 1 1.327861114 1.055356286 1.003001483  
 1.190644724 1.114273742 0.935732219 1.016843907 0.822100997  
 0.660970081 1 0.896322133 0.828584101 0.875424527 0.7849899  
 0.842831614 0.720638564  
 YMR015C YMR015C::ERG5::cytochrome P450 involved in C-22 denaturation of the  
 ergosterol side-chain 1 0.958330301 0.605280217 0.792652124 0.623286508 1  
 0.938084183 0.814069255 0.642902459 1 0.702503862 0.620024308  
 0.475241293 0.427660184 1 0.934592176 0.578421389 0.95088353  
 1.193536315 1 0.861126431 0.560986074 0.868824405 1.346191102 1  
 0.369003526 0.296962434 1.083127108 1.247301892 0.709881436 1  
 0.210719577 0.183872535 0.244458858 1.482562393 1.087939436 1  
 0.272351652 0.261351393 1.256334209 0.808618729 0.795608627 0.806449707  
 YDL040C "YDL040C::NAT1::Required for entry into stationary phase, heat  
 shock-resistance, a mating-type functions, and sporulation; forms a complex with  
 Ard1p" 1 0.685604163 0.715457379 0.983286609 0.721799029 1  
 0.8954658 0.943973077 0.712333692 0.663268459 1 0.763914651  
 0.798544503 0.478361897 0.837604726 1 0.920189662 0.621618382  
 0.791923863 0.573259853 1 0.820878137 0.658146119 0.639737188  
 0.640550621 1 0.928947041 0.913993043 1.047494429 1.026926046  
 0.99402106 1 0.905538772 0.563758104 0.910837031 0.892940153  
 0.420767558 1 0.747329073 0.58974951 0.93967633 0.756949461  
 0.651919213 0.651464271  
 YMR017W YMR017W::SPO20::DBF2 Interacting Protein; SNAP 25 homolog  
 1 0.591434341 1.436090861 1.11648124 1 0.725743694  
 1.581654654 1.758082593 0.842880127 1 1.239237765 1.440262646  
 1.273031938 1.431426285 1.473896697 1 0.687533432  
 1 0.619633099 0.594977269 -0.156095672 0.923025657  
 0.346747102  
 YDL042C "YDL042C::SIR2::regulator of silencing at HML, HMR, telomeres, and  
 rDNA" 1 0.721413659 0.675976932 0.767410624 0.800256816 1 0.789907685  
 0.701856765 0.706134938 1 0.58145446 0.500646056 0.495560127  
 0.73452301 1 0.703534001 0.576076186 0.678920529 1  
 0.564624423 0.931438111 0.70887543 0.839475539 1 1.061923251  
 0.915480183 0.887805181 0.977416945 1.108236332 1 0.906264669  
 0.691061489 0.859913844 0.705941442 0.792904711 1 0.846249054  
 0.72656289 0.954181283 0.989922335 0.707218369 0.711882332

YMR019W YMR019W::STB4::binds Sin3p in two-hybrid assay 1 0.858042225  
0.662494153 0.868064173 1 0.789252367 1.040107385 0.640474385  
0.632933985 1 1.009300082 0.832247197 1.00019759  
0.654293356 0.627253203 0.898070243 1 0.612716893  
1 0.844472237 0.796542597 0.804842416 0.908155056 0.925712199 1  
0.963906032 0.712558101 0.803358286 0.915548478 0.727137262 1  
1.020762825 0.89647612 1.193639418 0.654404959 1.092413104 0.852857756  
YDL044c YDL044c::MTF2::Necessary for the stability and/or processing of some  
large mitochondrial transcripts 1 0.781530841 0.990596946 0.978024902  
1.188763985 1 0.84931263 0.872528314 0.970483586 0.969866425 1  
0.966105283 0.893230049 1.032493435 1 1.026977699 1.017633116  
1.301237074 1.139813815 1 0.987283566 1.458231565 1.310433081  
1.165227513 1.702619433  
0.757414768  
YMR021C YMR021C::MAC1::metal-binding transcriptional activator 1  
0.772783358 0.717532489 0.848222799 1 0.766788098 0.751143846  
0.854266869 0.914990065 1 0.745871987 0.716437394 0.964873655  
0.768443341 1 0.544858407 0.304888734 0.421004201 1.100584419 1  
1.851826699 1.75726163 1.993333564 1 0.928480194 0.767102094  
0.874927787 0.986926187 1 1.032341448 0.858486945 1.018033222  
1.086930957 1 0.847237741 0.94099036 1.009200646 0.824140613  
0.895250574 0.79331536  
YDL046w YDL046w::YDL046W::molecular\_function unknown 1 1.211629383  
1.320908186 1.072823477 1.207655799 1 1.175742926 1.103571027  
1.137635784 1.268911863 1 1.456087617 1.653566408 2.25902116  
1.207680471 1 1.99225533 1.857605729 1.297437063 1  
1.205755539 1.820779868 1.7144502 0.86135843 1 1.340772139  
0.886652629 1.946028937 1  
1.178575765 0.81195496 1.091278955 0.927285829  
YDL048c YDL048c::STP4::Involved in pre-tRNA splicing and in uptake of  
branched-chain amino acids 1 0.874628941 0.885283519 1.034835834  
0.876392108 1 1.058995934 1.119861425 0.832309036 1.027483772 1  
0.92809823 1.503815071 1.759963015 1.667084294 1 1.907457937  
1.014897152 2.155302584 1.44294866 1 1.027977111 1.5590595  
1.380832397 1.085062868  
0.752122033  
1.203107335  
YDL062w YDL062w::YDL062W::molecular\_function unknown 1 0.698852289  
0.397535525 0.969929043 1 0.814292485 0.694768981 0.482516642  
0.694301753 1 0.357571733 0.270672454 0.295971944 0.846006272 1  
0.29719323 0.418428945 1 0.431005192 0.668476249  
0.630993476 1.188143375 1.064571438 0.88797719 1  
0.901391063 0.598053874 0.828802188 1.137442696 0.61133396  
0.780621585 0.991502975 1.3607117 0.750705612 0.734091711  
YDL064w YDL064w::UBC9::Conjugates Smt3p to proteins 1 1.052611464  
1.24412867 0.824246435 1.223173273 1 0.957986021 1.003067876  
1.103196199 1.22087136 1 0.946281293 0.925544255 1.218373707  
0.93141671 1 1.050895767 0.543568202 0.681085198 0.961225809 1  
1.059909652 1.292593648 1.158194062 0.719354604 1 1.018003162  
0.824797267 0.751842219 0.832810422 0.882769645 1  
0.724688636 0.716395948 0.681721323 1 0.972702143 0.946992935  
1.065766035 0.877260625 1.253017939  
YOR161C YOR161C::YOR161C::molecular\_function unknown 1 1.116001344  
0.935467551 1.924853561 0.724738242 1 1.631470531 1.739062646  
1.09003211 1 1.286845059 1.587525062 1.607246161 1.051140141 1  
4.011482202 4.617617892 1.45317859 1 1.848683807 1.131416186  
1.197767922 1.32163658 1 1.119171529 1.144584131 1.365130332

1.164371924 0.838299431 1 0.784877537 0.545238793 1.262109449  
0.508956444 0.425188913 1 1.11786082 0.545535241 0.858097768  
0.780671803 1.425066226 0.711006668  
YOR163W YOR163W::DDP1::Diadenosine and Diphosphoinositol Polyphosphate  
Phosphohydrolase 0.959172554 1.019242088 0.92694303 0.976032072  
0.824884868 1.114308207 0.689621536 0.893952973  
0.867384232 1  
1.411053254 1.443409695 1.159846935 1.043476924 1.450339603 1  
1.209490356 1.36124141 1.046286602 1.095281048 1.484410875 1  
0.918251368 1.178781302 1.24837893 1.011707438 1.222371128  
YOR163W YOR163W::DDP1::Diadenosine and Diphosphoinositol Polyphosphate  
Phosphohydrolase 1 0.976216735 1.271435413 0.846452594 1.805779256 1  
0.913739944 0.859418923 1.424147985 1.25156873 1 0.79702815  
1.085538675 1.599071191 1.025106207 1 1.056923162 0.73548929  
0.921235073 1.233297485 1 1.690250853 2.303943506 3.196917514  
1.336078823 1 1.19481219 1.105399977 1.607222392 1.196353601  
1.083676949 1 1.313514701 1.358649657 0.916139021 0.902299755  
1.107602027 1 0.763683001 0.960970543 0.703139468 0.884043275  
0.733118014  
YOR165W YOR165W::SEY1::Synthetic Enhancement with YOP1 1 1.011951331  
0.924986105 1.326994601 1.128297848 1 1.260661617 1.242417384  
1.016640932 0.997096871 1 1.092791445 0.93721436 0.515216272 1  
0.852529795 0.717704871 0.472604451 0.665955013 1 1.5001653  
0.584628445 0.777743205 1.18608788 1 1.010001156 0.990037438  
1.032281818 1.1288081 1.020053226 1 1.018604446 0.70410043  
0.860022611 0.845956909 0.673412132 1 1.023571719 0.838897757  
0.949304091 0.974685903 1.055213225 0.733772912  
YOR179C YOR179C::YOR179C::molecular\_function unknown 1 1.151721665  
1.291839459 1.2275228 1.527947564 1 1.140685754 1.2340754  
1.48866717 1.489373408 1 1.109772319 1.249953755 1.05034389  
1.168844172 0.762256409 0.794747994 0.673517142 0.946205744 1  
1.089235473 1.158485732 0.792624198 0.64498119 1 1.07256894  
0.861804613 0.995870989 1 1.123556012 1.088132051 1.047142574  
1.114712266 1.264301514 0.87834135 0.827441316 0.952640775  
1.05525683 1.173336189  
YMR023C YMR023C::MSS1::May play a part in mitochondrial translation 1  
0.708127302 0.846614193 0.92886242 1.020301872 1 0.645088777  
0.794805117 1.357071646 1.131872852 1 1.014559603 1.106182486  
0.906591606 0.755990395 1 0.925214459 0.689885324 1.314200619 1  
1.967139747 3.08549029 2.546615709 2.559651613 1 0.997291704  
1.036916427 1.071027602 0.916692771 1.053526541 1 0.771275865  
1.053960107 1.479732669 1.448883009 1 1.183783879 1.099241539  
1.291878433 0.877339007 1.768505917 1.145316164  
YOR181W "YOR181W::LAS17::Homolog of human WASP, proline-rich protein" 1  
0.801179566 0.771819359 0.698107785 0.59518391 1 0.945534982  
1.015750284 0.59425693 0.647442019 1 1.332081762 0.970009943  
0.550591245 1 1.80285232 1.449275085 1 0.968642163  
1 1.019771052 0.985668732 0.839448614 0.885575513 1  
0.991854305 0.708381842 0.861826657 0.869207073 0.612260145 1  
0.92783845 0.717839122 1.015219213 0.763344993 0.73902664  
YMR025W YMR025W::CSI1::COP9 signalosome interactor 1 0.788365581  
0.95630906 0.862571207 1.243816094 1 0.726683029 0.848325037  
1.201936955 1.120579533 1 0.840019222 1.268727345 2.260584804  
0.856868626 1 0.884472734 2.100720161 0.669535117 1.286170116 1  
1.610794305 2.130495391 1.895865756 1.286336522 1 1.024182376  
1.055470231 0.686383984 0.678260082 1.236386823 1 1.024275062

|          |                                                                                                                                  |             |             |             |             |             |   |  |
|----------|----------------------------------------------------------------------------------------------------------------------------------|-------------|-------------|-------------|-------------|-------------|---|--|
|          | 1.576227584                                                                                                                      | 1.78586709  | 2.117354811 | 1           | 1.135414648 | 1.181076074 |   |  |
|          | 2.075918055                                                                                                                      | 1.305555433 |             |             |             |             |   |  |
| YOR183W  | YOR183W::FYV12::Function required for Yeast Viability on toxin exposure                                                          |             |             |             |             |             |   |  |
| exposure | 1                                                                                                                                | 1.167230436 | 1.522430511 | 1.480027652 | 1.64777198  | 1           |   |  |
|          | 1.254342224                                                                                                                      | 1.439360705 | 1.327990038 | 1.667302979 | 1           | 1.137602445 |   |  |
|          | 1.421771273                                                                                                                      | 1.282683865 | 1.3446784   | 1           |             | 0.99468169  |   |  |
|          | 0.355070943                                                                                                                      | 0.585946744 | 0.291981618 | 1           | 1.004588046 | 0.908046231 |   |  |
|          | 0.650239194                                                                                                                      | 0.913906976 | 1.080200203 | 1           | 0.991842742 | 1.268813145 |   |  |
|          | 0.933161342                                                                                                                      | 0.770558231 | 1.728582391 | 1           | 0.977674955 | 1.257705781 |   |  |
|          | 1.004067075                                                                                                                      | 2.169888478 | 1.169563842 | 1.180341195 |             |             |   |  |
| YMR040W  | YMR040W::YMR040W::molecular_function unknown                                                                                     |             |             |             |             |             |   |  |
|          | 1.390252049                                                                                                                      | 1.235181552 | 2.063025496 | 1           | 1.175971707 | 1.232307406 |   |  |
|          | 1.87947854                                                                                                                       | 1.817823265 | 1           | 1.41128009  | 1.563435611 | 0.825135693 |   |  |
|          | 2.503946473                                                                                                                      | 1           | 2.048738714 | 4.037545619 | 2.143465747 | 3.204738488 | 1 |  |
|          | 1.444072384                                                                                                                      | 2.817772832 | 1.412127437 | 1           | 0.908440515 | 1.061288213 |   |  |
|          | 0.569767017                                                                                                                      | 0.655780545 | 1.01125329  | 1           | 1.138084986 | 1.658443247 |   |  |
|          | 2.138498522                                                                                                                      | 1.768064434 | 2.302440959 | 1           | 1.125905185 | 1.268970544 |   |  |
|          | 1.099871383                                                                                                                      | 1.55614871  | 1.119047469 |             |             |             |   |  |
| YOR185C  | "YOR185C::GSP2::maintenance of nuclear organization; homologous to mammalian Ran, a small nuclear GTPase of the ras superfamily" |             |             |             |             |             |   |  |
|          | 1.262149953                                                                                                                      | 1.501587501 | 1.044713689 | 1.61282934  | 1           | 1.14838125  |   |  |
|          | 1.414010459                                                                                                                      | 1.290563609 | 1.463318264 | 1           | 1.075174084 | 1.634591987 |   |  |
|          | 2.753579502                                                                                                                      | 1.078480275 | 1           | 1.48668729  | 1.113378155 | 1.981409214 |   |  |
|          | 2.619780959                                                                                                                      | 1           | 1.235398744 | 1.634110847 | 2.314872365 | 1.607986356 | 1 |  |
|          | 1.235731807                                                                                                                      | 1.781443597 | 1.934523778 | 1.47074356  | 1.426678219 | 1           |   |  |
|          | 0.909430945                                                                                                                      | 1.792927575 | 2.008156792 | 1.803945025 | 1.196386249 | 1           |   |  |
|          | 1.237451512                                                                                                                      | 1.572806005 | 1.361394242 | 1.493539706 |             |             |   |  |
| YMR042W  | YMR042W::ARG80::Regulator of arginine-responsive genes with ARG81 and ARG82                                                      |             |             |             |             |             |   |  |
|          | 1.154947235                                                                                                                      | 0.912193217 | 1.276922687 | 0.519832557 |             |             |   |  |
|          | 0.92499619                                                                                                                       | 0.953395544 | 0.926161021 | 1.019718415 |             | 0.947626768 |   |  |
|          | 0.995311681                                                                                                                      | 0.980426858 | 0.80864489  | 1           | 0.485940523 | 0.085421104 |   |  |
|          | 1.151873598                                                                                                                      | 0.367788814 | 1           | 0.480271555 | 0.211146704 | 0.398151    | 1 |  |
|          | 1.101469064                                                                                                                      | 1.193796483 | 1.318444107 | 1.607908225 | 1.922893394 | 1           |   |  |
|          | 0.753168392                                                                                                                      | 0.398608455 | 0.585631926 | 0.942685056 | 0.360935503 | 1           |   |  |
|          | 0.698254223                                                                                                                      | 0.367473931 | 0.848537716 | 0.311780574 | 0.727827505 | 0.380020803 |   |  |
| YOR187W  | "YOR187W::TUF1::Translation elongation factor Tu, mitochondrial"                                                                 |             |             |             |             |             |   |  |
|          | 0.940945458                                                                                                                      | 0.929403316 | 1.297979015 | 0.852821685 | 1           | 1.194256262 |   |  |
|          | 0.946509804                                                                                                                      | 1.112817312 | 1           | 0.940117284 | 0.937895997 | 0.81778756  |   |  |
|          | 0.872152502                                                                                                                      | 1           | 1.310464178 | 1.193230817 | 1.058452984 | 1.155323404 | 1 |  |
|          | 0.988762645                                                                                                                      | 0.603356384 | 0.615427633 | 0.942593987 | 1           | 1.14877552  |   |  |
|          | 1.041023656                                                                                                                      | 1.210532327 | 1.154336395 | 1.133022163 | 1           | 1.155000223 |   |  |
|          | 0.773830203                                                                                                                      | 0.917207387 | 0.519559721 | 0.449352326 | 1           | 1.244943353 |   |  |
|          | 0.645871684                                                                                                                      | 0.781786332 | 0.67322901  | 1.227558415 | 0.686489198 |             |   |  |
| YMR044W  | YMR044W::IOC4::Iswi One Complex                                                                                                  |             |             |             |             |             |   |  |
|          | 0.78046005                                                                                                                       | 1           | 0.76907774  | 0.817723397 | 0.996405138 | 0.897221975 | 1 |  |
|          | 0.756755966                                                                                                                      | 0.855195232 | 0.748459434 | 0.954570879 | 1           | 0.738306873 |   |  |
|          | 0.646761882                                                                                                                      | 1.099333823 | 0.983572848 | 1           | 0.966736402 | 1.290415893 |   |  |
|          | 1.091790351                                                                                                                      | 0.730031151 | 1           | 1.040962609 | 1.069821413 | 1.068327797 |   |  |
|          | 1.209688031                                                                                                                      | 1.305305732 | 1           | 0.954377049 | 0.955042782 | 0.738162878 |   |  |
|          | 0.7823958                                                                                                                        | 0.834437411 | 1           | 0.683105432 | 0.999552189 | 0.857206966 |   |  |
|          | 0.487100237                                                                                                                      | 0.844965653 | 0.810827823 |             |             |             |   |  |
| YOR189W  | YOR189W::IES4::Ino Eighty Subunit 4                                                                                              |             |             |             |             |             |   |  |
|          | 0.936913249                                                                                                                      | 1.849346706 | 1           | 0.956778807 | 1.784999172 | 1.561963547 | 1 |  |
|          | 0.920993347                                                                                                                      | 1.281654701 | 1.495126105 | 1.361864064 | 1           | 0.943094113 |   |  |
|          | 0.787265716                                                                                                                      | 0.660062142 | 1.486811797 | 1           | 1.745370336 | 2.254300136 |   |  |
|          | 1.891345394                                                                                                                      | 0.989004293 | 1           | 0.991989786 | 1.306219661 | 0.696436546 |   |  |
|          | 0.598997321                                                                                                                      | 0.958697741 | 1           | 0.976973202 | 1.570618185 | 1.675509422 |   |  |

1.545428573 2.039789296 1 1.168022511 1.424214524 1.348508894  
1.836736895 1.995795352 1.369475945  
YMR047C YMR047C::NUP116::Involved in nucleocytoplasmic transport; may be  
required for biogenesis of tRNA 1 0.728109701 0.762547006 1.033493721  
0.550717571 1 1.094039504 1.143345581 0.735583801 1  
1.077863847 0.962803329 0.464130939 0.836211544 1 0.77476044  
0.468011456 0.586888007 0.634439067 1 0.930044643 0.77046546  
0.660174495 0.547343264 1 0.868565533 0.870559951 0.860053812  
0.879690782 0.955336832 1 0.978067223 0.676667978 0.709854916  
0.810474629 0.57736819 1 1.054204368 0.860041755 0.742213142  
0.921583949 0.836235021 0.719762951  
YOR203W YOR203W::YOR203W::molecular\_function unknown 1 1.883228072  
2.183200938 1.096961737 1.791737262 1 1.230628033 1.674923576  
1.484567042 1 2.206582413 2.566976114 1.608755829 0.932100292 1  
0.386697054 0.20130334 0.159650389 0.284603822 1 2.076897844  
4.437909682 1.695228114 0.874662652 1 0.795415901 0.776471337  
0.391418072 0.583253278 0.717200907 1 1.008500692 1.196332794  
0.82211339 0.658257617 2.069977736 0.969243411 0.877373159  
0.742396005 1.445917656 1.487006324 1.290669756  
YMR049C YMR049C::ERB1::Eukaryotic Ribosome Biogenesis 1 1.028912391  
0.78482345 0.863080399 0.829953785 1 0.851840172 0.870333542  
0.936247788 1.003405912 1 0.764069799 0.512982022 0.430156808  
0.975605701 1 0.410073665 0.236977856 0.328734304 0.509277975 1  
0.465982364 0.319508755 0.257933534 0.334989736 1 0.807781978  
0.392631688 0.670597774 1.171036691 0.772820611 1 0.851692078  
0.501747365 0.370661047 0.887279476 0.855188663 1 0.598651504  
0.511058611 0.900992083 0.955881725 0.379379952 0.699623598  
YMR052W YMR052W::FAR3::Required for arrest in G1 in response to pheromone 1  
0.908709636 1.414997749 1.026276077 1.947435459 1 0.982739178  
1.242681854 1.524035207 1 1.121629402 1.184786994 1.778833454  
1.371667991 1 0.757865106 0.593929628 0.733419405 0.961729828 1  
1.61562823 2.230915357 1.92672278 1 0.98537719 1.547172837  
1.012383929 0.796908536 1.048645209 1 1.328569078 1.758782405  
1.543115025 1.734939317 1.906722586 1 1.255678841 1.498689063  
1.478371188 1.414132768  
YMR068W YMR068W::AVO2::Adheres voraciously (to TOR2) 1 0.893621265  
1.153737342 1.144194932 0.876553682 1 0.976333709 1.194218663  
0.98249819 0.955512115 1 1.080621706 1.23824129 1.351762155  
1.077112305 1 1.127870786 0.85068012 1.161628286 1.488120865 1  
1.220246727 2.09238935 2.097693119 1.437743133 1 1.18948496  
1.176572744 1.48948872 0.964746672 1.025540836 1 1.238093228  
1.074574015 0.959497106 1.25086982 0.901938865 1 0.951129659  
1.157150834 0.99549477 1.131002001 0.810827823  
YMR070W YMR070W::MOT3::High Copy Suppressor of MOT1-SPT3 synthetic lethality.  
May have a role in the regulation of membrane-related genes. 1  
0.636211371 0.820057112 0.719060676 0.744902174 1 0.76345696  
0.892156445 0.64886557 0.54560585 1 0.713422685 0.724757435  
0.78840535 0.563843173 1 0.79949789 0.713296417 0.701557551  
0.69573891 1 0.938291173 1.377832431 1.093355313 1.579823081 1  
0.542641401 0.524560822 0.687503674 0.518234144 1.08761214 1  
0.887723656 0.804955501 0.657408521 1.10672477 1.21982809 1  
0.670554043 1.057210298 1.237725611 1.249508788 1.181022452 0.985952665  
YOR205C YOR205C::YOR205C::molecular\_function unknown 1 0.909870183  
0.949334861 1.437241854 1.37101863 1 1.146021256 0.908538133  
0.87221621 1.258101945 1 0.783276509 0.823704529 0.788105187  
1.065667513 1 0.488778476 0.366140377 0.576240357 0.802685226  
0.570441841 0.702241555 0.563367034 0.892536992 1 0.728614301

0.759902015 0.791862 0.750315895 0.845350535 1 0.848641249  
 0.86777459 0.931552323 0.840580711 1 0.808816816 0.842335809  
 1.048597867 0.920005028 0.908255098 0.753912265  
 YOR207C YOR207C::RET1::second-largest subunit of RNA polymerase III 1  
 1.481637226 1.056474057 1.585003559 1.208855025 1 1.372993019  
 1.319979483 0.920316389 1.06747317 1 1.308347848 1.219466266  
 1.542362629 1.874997108 1 0.422941432 0.360655075 1  
 0.318845298 0.895102809 1 0.92019642 0.568295304  
 0.841632729 1.054317708 0.879619798 1 1.007798053 0.4456193  
 0.571837843 0.778813141 0.405456126 1 0.783811307 0.561087451  
 0.703236663 0.718754788 0.467205164 0.57440936  
 YOR209C YOR209C::NPT1::homology to bacterial nicotinate phosphoribosyl  
 transferase; NAD(+) salvage pathway 1 1.067380239 0.948344332 1.131235976  
 1.13322163 1 1.105918552 1.096469497 1.214391949 1.045890976 1  
 0.855568371 0.948646524 0.643103286 1.04615004 1 0.994604728  
 0.830844018 0.691685735 1.029750592 1 1.075778756 0.545181899  
 0.722237795 0.907937869 1 0.955581454 1.1383872 1.187805367  
 1.027738485 0.985027135 1 1.135655986 1.196596611 1.047616669  
 0.950545841 1.007487507 1 0.857065702 0.966430371 0.927943681  
 1.073494768 0.925301774 0.867743381  
 YOR211C YOR211C::MGM1::involved in the propagation of functional  
 mitochondria yeast 1 1.164365235 1.210211945 1.475266563 1.51689378 1  
 1.504968809 1.418874199 1 1.023047439 1.150125655  
 1.247393977 0.484105245  
 1 1.214652254 1.297814379 1.31646212 1.124954671 1.084337182 1  
 1.148566581 1.242335052 1.047672308 1.070207411 1.082068177 1  
 1.096216826 1.255654417 1.128692941 1.173505526 1.019307288 1.196102433  
 YMR072W "YMR072W::ABF2::HMG-1 homolog, mitochondrial" 1 1.412444866  
 1.512544034 1.218166374 2.310313291 1 1.194874711 1.645167749  
 1.748861813 1 1.174403961 1.396355089 1.866584137 1.573178236 1  
 1.257608011 1.030051139 0.717340252 1.050507815 1 1.709730528  
 1.729244716 2.206340407 1.358402445 1 0.917266111 1.064469754  
 0.784169946 0.818577687 0.902547932 1 1.385841507 2.121046294  
 1.507471494 1.304707087 2.683518836 1 1.290590464 1.985990367  
 1.107772182 2.3811361 1.574656247 1.319565341  
 YOR213C "YOR213C::SAS5::Involved in silencing at telomeres, HML and HMR" 1  
 1.077323503 0.885830743 1.055566545 1.063344758 1 0.973279371  
 0.8378838 0.984211919 1.131229338 1 0.823141562 0.831217269  
 0.777947531 0.910476911 1 0.957767237 0.811331061 0.771668957  
 1.068998961 1 1.060576488 0.959565722 0.582131679 0.726824411 1  
 0.904061495 0.937541197 0.969856485 0.969831816 0.922052828 1  
 0.905038211 0.843112442 0.884433574 0.970214232 1.016667926 1  
 0.907202879 0.940189077 1.020610345 1.110817409 1.030772219 1.109415573  
 YMR074C YMR074C::YMR074C::molecular\_function unknown 1 1.278332302  
 2.000544539 1.286201056 2.507654806 1 1.123502345 1.221081969  
 2.651387596 2.044526671 1 1.087757981 1.552931503 2.402809494  
 1.595649376 1 1.14950217 0.856962721 0.931040482 2.044945839 1  
 2.051900433 3.008790202 3.362120946 2.096187456 1 0.791507706  
 0.896408881 0.628850265 0.634336614 0.867769962 1 1.046167905  
 1.756635171 1.319946924 1.490942968 2.548966995 1 1.100268209  
 1.683443913 1.186970709 2.084704483 1.273886784 1.757377341  
 YOR227W YOR227W::YOR227W::molecular\_function unknown 1 0.91507676  
 0.866373898 0.761019171 1 1.181206064 1.447034672 0.768615861  
 0.681243577 1 1.462345337 1.356275094 0.886722765 0.892972909 1  
 2.252737394 1.966280917 2.105326476 0.833690597 1 1.921716125  
 1.463125043 0.96320322 1.283758779 1 1.274721766 1.684893796  
 1.621440472 1.372479167 1.02939434 1 1.449292872 1.181170635

1.544081475 1.23995772 0.575780756 1 1.294023034 1.24987166  
1.141034666 0.876909277 1.173718424 0.731146021  
YMR076C YMR076C::PDS5::Precocious Dissociation of Sister chromatids  
0.933315566 0.796033783 1.130445648 1.052391722 1.018222273  
1.008314657 0.831386451 0.787277693 0.715016691 0.620508567  
1.229610225 1 0.807520934 0.802041496 0.674052689  
0.583790959 1 0.855405379 0.733283044 0.971207075 0.757198422  
0.985022851 1 1.046010474 1.314674581 1.111965648 1.576641283  
1.174317059 1 1.086646223 1.397397625 1.527728727 1.068293968  
1.019121066 1.185594872  
YOR229W YOR229W::WTM2::WD repeat containing transcriptional modulator 2 1  
0.927480713 0.950299667 0.812313441 0.95560079 1 0.896306454  
0.776132446 0.931671589 0.993247549 1 0.831087527 0.741002122  
0.952915436 0.838916229 1 0.948309032 0.691904419 0.779943851  
0.873926372 1 1.348445181 2.031533396 1.039983359 1.006429794 1  
0.897715743 0.900038888 1.087857543 1.250248959 1.116674106 1  
0.911903845 0.822524269 0.952275638 1.133658962 0.86013279 1  
0.916770503 0.92579118 1.240713415 1.225810346 0.939606846 0.817832829  
YMR078C YMR078C::CTF18::Chromosome transmission 1.06136938  
0.758452798 0.809607384 0.915310347 0.854541193 0.817512639  
0.940420738 0.611255459 0.533089377 0.883048088  
1 1.016679205 0.935931386  
1.224166511 1.274746175 1.25807089 1 1.006911048 0.941169358  
1.030761918 1.032894607 1 0.749599913 1.238787985 0.777698007  
1.196605202 0.569396776 3.502496  
YOR231W YOR231W::MKK1::Mitogen-activated kinase-kinase involved in protein  
kinase C pathway 1 0.666260411 0.552276801 0.829278239 0.489749349 1  
0.8891128 0.877098476 0.517744949 1 0.845805808 0.802973174  
0.506198084 0.607558633 1.542196361 1.161365447 1.461080391  
0.992965882 1 0.950955645 1.642213614 1 0.9589121  
0.987004301 1.148955531 1.004177187 1.027913065 1 0.987807282  
0.7635058 0.996751381 0.940985097 0.879603479 1 0.857486282  
0.802508119 1.000723345 0.716377391 0.893896261 0.76879789  
YMR095C "YMR095C::SNO1::SNZ1 proximal ORF, stationary phase induced gene" 1  
0.947242474 0.733013721 0.902436254 0.50259075 1 0.784882149  
0.615882609 0.659023385 1 0.897766135 1.75706598 1.336775429  
1.027087007 0.451397273 0.723008822  
1 0.8235391 1.113914002 1.22776462 1.086324368 1  
0.438967639 1.256742488 0.947553634 1 0.656489417 0.566664267  
0.880098273 1.033338211  
YOR233W YOR233W::KIN4::protein kinase 0.901302076 0.872334557  
1.106964551 1.121898501 1.076414381 0.911586271 1.074235522  
0.822241002 0.679054335 0.689453909 1.118984434 1 0.519389213  
0.355358065 1 0.72872711 0.837694322 1  
0.905925954 0.80746609 0.861961986 1.048604387 0.976163495 1  
0.933355554 0.797354641 0.682953565 0.775242453 0.767750498 1  
0.898656317 0.901070367 0.870191769 1.181252714 0.801932028 0.707504217  
YMR097C YMR097C::MTG1::Hypothetical ORF 0.948090967 1.013548004  
0.912407119 0.910441177 0.784551746 0.818294595 1.090458558  
1.004850073 1.047694229 1.659557979 1.842828608 1.006400689 1  
0.932766141 0.663087513 0.894293677 1.354512879 1 2.941393359  
4.044058097 4.221505322 2.507392064 1 0.998266853 1.073439303  
0.760170637 1.193856073 1 0.902737779 1.30887847 1.395257813  
1.092559807 1.21539101 0.83857166 1.179817252 0.859177385  
0.804657803 0.90349748 1.217993012  
YOR235W YOR235W::YOR235W::molecular\_function unknown 1 1.432632357  
1.976895184 1 1.56345118 1 1.006617784



|             |                                                                                             |                                |             |             |             |
|-------------|---------------------------------------------------------------------------------------------|--------------------------------|-------------|-------------|-------------|
| 1.260696005 | 1.570846529                                                                                 | 1.699111701                    | 1           | 0.622753015 | 0.342540954 |
| 0.38007952  | 0.458600848                                                                                 | 1                              | 1.17277382  | 0.791333238 | 0.65059658  |
| 0.701452705 | 0.984908215                                                                                 |                                |             |             | 1           |
| 1.007878966 |                                                                                             | 1                              | 0.709049011 | 0.951756509 |             |
| 0.361494237 |                                                                                             |                                |             |             |             |
| YMR099C     | YMR099C::YMR099C::molecular_function                                                        | unknown                        | 1           | 1.520942736 |             |
| 1.361107168 | 1.293406053                                                                                 | 1.794296292                    | 1           | 1.2356208   | 1.261745437 |
| 1.534782326 | 1.673428523                                                                                 | 1                              | 1.124182808 | 1.386187485 | 1.610092696 |
| 1.74884717  | 1                                                                                           | 1.161105598                    | 0.933619475 | 1.161182029 | 1.324080102 |
| 1.398060874 | 1.17752656                                                                                  | 1.943557948                    | 1.406227888 | 1           | 1.040460884 |
| 1.247904256 | 1.395693985                                                                                 | 1.025304649                    | 0.853185053 | 1           | 1.199206471 |
| 1.461771514 | 1.460058559                                                                                 | 1.162095347                    | 1.289291563 | 1           | 1.102791577 |
| 1.589468595 | 1.150012679                                                                                 | 1.023896169                    | 1.011085705 | 1.573496372 |             |
| YMR101C     | YMR101C::SRT1::cis-prenyltransferase                                                        | involved in dolichol synthesis |             |             |             |
|             |                                                                                             |                                |             |             | 1           |
| 1.319768363 | 1.636458226                                                                                 | 1.801211608                    | 1.200287031 | 1           | 1.832154052 |
| 3.008128352 | 3.406255782                                                                                 | 3.070524687                    | 1           | 1.414427936 | 2.56631939  |
| 2.085400072 | 1.596117605                                                                                 | 1.384361518                    |             |             |             |
| YMR103C     | YMR103C::YMR103C::molecular_function                                                        | unknown                        | 1           | 1.050940489 |             |
| 1.033655403 | 0.623627611                                                                                 | 1                              | 1.017009694 |             | 0.995640857 |
| 1.408032233 | 1.278223185                                                                                 | 2.461890434                    | 0.939536616 | 1           | 1.792742954 |
| 1.205146618 | 1.811530492                                                                                 | 1.720712991                    | 1           | 2.410929741 | 2.720960358 |
| 2.467383754 | 1.408921119                                                                                 | 1                              | 1.103815917 | 1.01291954  | 1.008736693 |
| 1.15763027  | 1                                                                                           | 1.373030344                    | 1.002625371 | 1.467734061 | 1.298544884 |
| 1.093512566 | 1                                                                                           | 0.831627042                    | 0.863437366 | 0.823403986 | 0.554271699 |
| 0.950016041 | 0.990330781                                                                                 |                                |             |             |             |
| YMR105C     | YMR105C::PGM2::Phosphoglucomutase                                                           | 1                              | 0.738524767 | 1.294299837 |             |
| 1.247778407 | 0.594745004                                                                                 | 1                              | 1.393169519 | 2.465583638 | 0.920922241 |
| 0.821310734 | 1                                                                                           | 1.118844942                    | 2.291255151 | 4.402464243 | 1.049645571 |
| 13.78263561 | 2.983863439                                                                                 | 20.78804025                    | 5.828430792 | 1           | 6.176625511 |
| 3.058908102 | 6.479937646                                                                                 | 3.883020939                    | 1           | 1.32171494  | 2.412085468 |
| 4.533544914 | 1.138293531                                                                                 | 1.582284886                    | 1           | 1.510047238 | 2.162610155 |
| 5.941819062 | 3.534772502                                                                                 | 1.385821264                    | 1           | 3.087866759 | 3.151809987 |
| 2.260710506 | 1.634861233                                                                                 | 7.683129871                    | 1.306430994 |             |             |
| YGR054W     | YGR054W::YGR054W::molecular_function                                                        | unknown                        | 1           |             |             |
| 0.789990681 | 1.382089027                                                                                 | 0.909781219                    | 1           | 1.334207149 | 1.456946169 |
| 0.732074315 | 0.947594064                                                                                 | 1                              | 1.064097629 | 0.946438302 | 0.676511245 |
| 0.879970274 | 1                                                                                           | 0.947301439                    | 0.799642181 | 0.914665691 | 0.688921735 |
| 0.477508541 | 0.302123604                                                                                 | 0.281352349                    | 0.465877952 | 1           | 0.786825521 |
| 0.658940024 | 0.795782268                                                                                 | 0.878313338                    | 0.623222917 | 1           | 0.729317785 |
| 0.52356987  | 0.405737483                                                                                 | 0.598289259                    | 0.355512881 | 1           | 0.764755644 |
| 0.644072074 | 0.720465534                                                                                 | 0.550821741                    | 0.57857956  | 0.420299511 |             |
| YGR056W     | "YGR056W::RSC1::RSC1 is a member of RSC complex, which remodels the structure of chromatin" |                                | 1.007192789 | 0.987355188 | 1.140508899 |
| 1.095708805 | 1.145612407                                                                                 | 0.805587814                    | 0.669074067 |             | 1.040460387 |
| 1.208970538 | 0.681273983                                                                                 | 0.885985017                    | 1           | 0.905691819 | 0.953783919 |
| 0.551894679 | 1                                                                                           |                                |             | 1           | 0.732126414 |
| 0.711978657 | 0.719582615                                                                                 | 0.946423978                    | 1           | 0.948230985 | 0.839461323 |
| 0.619493143 | 0.914504351                                                                                 | 0.687474304                    | 1           | 0.912738395 | 0.774062843 |
| 1.016318351 | 0.743758548                                                                                 | 1.053110116                    |             |             |             |
| YGR070W     | YGR070W::ROM1::Gdp-GTP Exchange Protein (GEP) for the Rho1p Small GTP-binding Protein       | 1                              | 1.245212059 | 2.428411903 | 5.10201091  |
| 1.305643097 | 1.172108336                                                                                 | 4.767342898                    | 1           | 1.390750264 | 1.335379637 |
| 1.888068307 | 3.376886613                                                                                 | 1                              | 0.726430842 | 0.480598062 | 0.660955709 |
| 0.932617845 | 1                                                                                           | 0.547272507                    | 0.318704773 | 0.38519843  | 0.651785958 |
| 1.448289848 | 1.37735111                                                                                  | 1.24557226                     | 1.086301964 | 1.341660473 | 1           |

1.374620955 1.093610358 1.087558544 1.365789572 0.854743794 1  
1.701129983 1.390523423 1.246132057 1.579394241 1.074390646  
YGR072W YGR072W::UPF3::factor stimulating decay of mRNAs containing  
premature stop codons; acts with Nmd2p and Nam7p 1 1.219611315  
1.224390522 1.357283328 1.474900416 1 1.143819883 1.12148939  
1.286682228 1.308064053 1 1.036980062 1.184150646 1.3017654  
1.241331976 1 0.829228459 0.806915471 0.757872744  
0.996333099 0.920771908 0.592488048 1 0.713701872 0.750489497  
0.566802243 0.569621023 0.967859057 1 1.043242142 0.859150807  
1.529583769 1.58328044 1 1.106439174 1.016064482 0.993755081  
1.048478238 1.498198119 0.713633558  
YGR074W "YGR074W::SMD1::Homolog of human core snRNP protein D1, involved in  
snRNA maturation" 1 1.409448005 1.539985159 1.262870276 1.658518903 1  
1.197429891 1.158403729 1.773525369 1.571483878 1 1.181349249  
1.217220721 1.412560075 1.350749255 1 1.174023676 0.919404795  
0.867669377 1.097821796 1 1.182798107 1.212601866 1.241037446  
1.220607834 1 1.054143124 1.050024524 0.869168885 0.910906792  
0.933773403 1 0.77012344 1.393657456 0.786993865 0.947641426  
1.117673231 1 1.450237208 1.247079037 1.167647026 1.401309623  
1.429985508 1.365097829  
YGR076C YGR076C::MRPL25::Mitochondrial ribosomal protein MRPL25 (YmL25) 1  
1.240930746 1.587861614 1.38953727 1.723760031 1 1.202058822  
1.341189772 2.163058522 1.599613172 1 1.32754453 1.582263044  
2.20943875 1.466122846 1 1.576125747 1.963072737 1.066062933  
1.709590367 1 1.700530939 2.261862341 1.178822164 1  
0.981602077 1.155195922 0.714363973 0.732786079 0.979265603 1  
1.12995527 1.861954463 1.413041675 1.506111836 2.218331848 1  
1.661035746 1.775236504 1.157519768 1.48984297 2.341931322 1.619904421  
YGR078C "YGR078C::PAC10::Polypeptide 3 of a Yeast Non-native Actin Binding  
Complex, homolog of a component of the bovine NABC complex" 1 0.993938527  
1.294000044 0.895509293 1.117547701 1 1.069568828 1.206219769  
1.29946545 1.179773412 1 0.872462089 0.975801869 1.127518746  
0.990173679 1 0.589010609 0.770019905 1 0.834053628  
0.918307529 0.42956891 0.874235417 1 0.953781017 1.066236791  
0.800316708 0.995582138 0.775619774 1 0.984158466 0.924740866  
0.618513829 1.176682583 1.118716767 1 0.657915041 0.751119346  
0.848623114 0.859724089 0.717058734 0.872121497  
YGR080W "YGR080W::TWF1::Twinfilin A is a member of a conserved family of  
actin monomer sequestering proteins. TWF1 is comprised almost entirely of two  
tandem repeats, each having sequence homology with cofilin (COF1)." 1  
1.040385929 1.353837175 1.091753296 1.205166636 1 1.197779347  
1.188466614 1.345018003 1.103633462 1 1.085207543 1.385276169  
1.398801444 1.243104796 1 1.643207905 1.402519214 1.300487145  
1.836851162 1 1.368875395 1.226952213 1.311858291 1.154478204 1  
1.053581566 1.27663541 1.051715781 0.830438193 0.930540957 1  
1.234283299 1.504027333 1.323467129 1.17932592 1.651089042 1  
1.419302792 1.556266216 1.318371548 1.518331367 1.582030619 1.302052878  
YGR094W YGR094W::VAS1::mitochondrial and cytoplasmic valyl-tRNA synthetase  
1 1.328872484 0.911852782 1.795645413 0.892056546 1 1.564743959  
1.566953096 0.760569975 0.909648259 1 1.178815737 1.103375387  
0.378222371 1.105157 1 1.011418773 0.423439394 1  
1 0.902762009 0.843665283 0.861886006 0.918441913  
0.814854814 1 0.951953782 0.640678237 0.78426288 0.741171298  
0.414370403 1 0.896042796 0.797058973 0.79684614 0.808434982  
0.479076295 0.604180558  
YGR096W YGR096W::YGR096W::molecular\_function unknown 1 1.330296835  
1.06703144 1.16604965 1.085552763 1 1.21986818 1.17920187

|             |                                                                                                                                                                     |             |             |             |             |
|-------------|---------------------------------------------------------------------------------------------------------------------------------------------------------------------|-------------|-------------|-------------|-------------|
| 1.055918517 | 1.227220851                                                                                                                                                         | 1           | 1.439836954 | 1.145178118 | 1.27583614  |
| 1.057711133 | 1                                                                                                                                                                   |             | 1.270021163 | 1           | 1.235256724 |
| 1.128281874 | 0.911395633                                                                                                                                                         |             | 1           | 1.044328119 | 0.915130276 |
| 1.150942601 | 1.029179174                                                                                                                                                         | 1           | 0.678877937 | 0.677593397 | 0.917125494 |
| 0.821032694 | 0.630093205                                                                                                                                                         | 1           |             | 0.703711652 | 0.796673521 |
| 0.784287464 | 0.782807851                                                                                                                                                         |             |             |             | 0.842145742 |
| YMR122C     | YMR122C::YMR122C::molecular_function unknown                                                                                                                        |             |             |             | 1.270688117 |
| 0.94066364  | 0.66765684                                                                                                                                                          |             | 1.232521112 | 1.173071931 |             |
| 0.722352163 | 1.388888004                                                                                                                                                         | 1.304165103 | 0.879930223 | 0.980946953 | 1           |
|             | 0.648246926                                                                                                                                                         |             | 0.499427632 |             | 1           |
| 1.225114534 | 1.290865923                                                                                                                                                         | 1.26296592  | 1.473121658 | 1.222888433 | 1           |
| 0.839365995 | 0.761576499                                                                                                                                                         | 0.54403109  | 0.870844764 | 0.806888174 | 1           |
| 0.778904904 | 0.88272702                                                                                                                                                          | 0.983644966 | 0.942370922 | 0.991559148 | 0.92991272  |
| YMR124W     | YMR124W::YMR124W::molecular_function unknown                                                                                                                        |             |             |             | 1           |
| 1.059350672 | 1.317576114                                                                                                                                                         | 0.966985232 | 1           | 1.229770243 | 0.973628929 |
| 0.969878403 | 1                                                                                                                                                                   | 1.290594821 | 1.376965267 | 0.890910415 | 1.245136262 |
| 2.833288747 | 0.770348718                                                                                                                                                         | 0.951706869 |             | 0.484293482 | 1           |
| 1.088163761 | 1.244717723                                                                                                                                                         | 1.240226419 | 1.273764908 | 1.001003234 | 1           |
| 0.980689432 | 1.058562688                                                                                                                                                         | 1.027090714 | 0.987302729 | 0.801994211 | 1           |
| 0.970736616 | 1.124790513                                                                                                                                                         | 1.197637244 | 1.112100579 | 1.006331699 | 0.913275817 |
| YMR126C     | YMR126C::YMR126C::molecular_function unknown                                                                                                                        |             |             |             | 1           |
| 0.898234963 | 0.864335479                                                                                                                                                         | 1.216962807 | 1           | 0.84302629  | 0.936556039 |
| 1.065008639 | 1                                                                                                                                                                   | 0.897577453 | 0.883158056 | 0.796430282 | 1.077380608 |
| 1.266620042 | 0.540950388                                                                                                                                                         | 0.881404337 | 1.073788578 | 1           | 1.942197184 |
| 1.899460284 | 1.426213405                                                                                                                                                         | 1           | 1.170500957 | 1.412266812 | 1.368504123 |
| 1.211757084 | 1.263986384                                                                                                                                                         | 1           | 0.871645439 | 1.167906895 | 0.822612271 |
| 0.750319613 | 0.95913568                                                                                                                                                          | 1           | 1.547605365 | 2.053096306 | 1.841317795 |
| 2.393624432 | 1.998688237                                                                                                                                                         | 1.290669756 |             |             |             |
| YMR128W     | YMR128W::ECM16::part of small (ribosomal) subunit (SSU) processosome (contains U3 snoRNA); ExtraCellular Mutant<br> DEAH-box protein involved in ribosome synthesis |             |             |             |             |
|             | 0.951784853                                                                                                                                                         | 0.891694485 |             | 0.879114164 |             |
| 0.912888922 | 0.867721804                                                                                                                                                         | 0.967679328 |             | 0.84635369  | 0.631457052 |
| 0.710488105 |                                                                                                                                                                     |             |             | 0.590003258 |             |
| 0.441376391 | 1                                                                                                                                                                   | 0.482905474 | 0.573888956 | 0.854949684 | 0.728451178 |
| 0.811609738 | 0.662254705                                                                                                                                                         | 0.628568735 | 1.303183237 | 0.787817951 | 1           |
| 0.597764403 | 0.673879707                                                                                                                                                         | 0.803854464 | 0.674562932 | 0.437681909 | 0.865992156 |
| YMR130W     | YMR130W::YMR130W::molecular_function unknown                                                                                                                        |             |             |             | 1           |
| 1.370567404 | 1.353864153                                                                                                                                                         | 1.348546924 | 1           | 1.260586991 | 1.040817649 |
| 1.354355677 | 1.26287233                                                                                                                                                          | 1           | 1.214731318 | 1.189438671 | 1.28504195  |
| 0.900481296 | 1                                                                                                                                                                   |             | 1.13692933  |             |             |
| 0.558786874 | 1                                                                                                                                                                   | 1.074671455 | 0.937352783 | 1.291338041 | 0.919186375 |
| 1.406652476 | 1                                                                                                                                                                   | 1.281555676 | 1.217679511 | 1.234091183 | 0.84352046  |
| 1.697186046 | 1                                                                                                                                                                   | 0.862981235 | 1.128041457 | 0.779301817 | 1.147443556 |
| 0.660035159 | 1.585755055                                                                                                                                                         |             |             |             |             |
| YMR132C     | YMR132C::YMR132C::molecular_function unknown                                                                                                                        |             |             |             | 1           |
| 1.108059418 | 1.072586488                                                                                                                                                         | 1.398534946 | 1           | 0.795878764 |             |
| 1.209815745 | 1                                                                                                                                                                   | 0.862550582 | 0.778520855 | 0.913616126 | 1.131850248 |
|             | 0.975948253                                                                                                                                                         | 1           | 0.66472182  | 0.939461992 | 0.701923426 |
| 0.868640825 | 0.772490584                                                                                                                                                         | 0.65962433  | 0.790424172 | 0.975722069 | 1           |
| 0.909720392 | 1.186319675                                                                                                                                                         | 0.793642595 | 0.998556205 | 1.289466697 | 1           |
| 0.973376197 | 1.124330391                                                                                                                                                         | 0.954291741 | 1.467030229 | 1.023377002 |             |
| YMR148W     | YMR148W::YMR148W::molecular_function unknown                                                                                                                        |             |             |             | 1           |
| 2.266307287 | 1.837390832                                                                                                                                                         | 2.31733181  | 1           | 1.921893407 | 1.75122653  |
| 2.158766665 | 2.24655066                                                                                                                                                          | 1           | 1.896967147 | 2.301862852 | 3.726251489 |
| 1.738604119 | 1                                                                                                                                                                   | 1.750878252 | 1.746958818 | 1.836458799 | 1.703179799 |
| 1.130203713 | 2.119785269                                                                                                                                                         | 2.178748662 | 1.05247822  | 1           | 1.204501103 |
| 1.189870758 | 1.136541588                                                                                                                                                         | 1.044650179 | 0.80953806  | 1           | 0.848076633 |

0.984837111 0.947246784 0.847296665 0.968356808 1 1.261388422  
 1.246712577 1.252318995 1.312903615 1.756069404 1.135684372  
 YMR150C YMR150C::IMP1::Inner membrane protease (mitochondrial protein)  
 0.97641057 1.010131594 0.814010271 1.183573513 0.73975481  
 0.786441535 1.143457708 1.071757502 0.733024232 0.890597722  
 1.190768816 0.897732909 1 2.005308434 1.475016487 1.397187519  
 2.616486327 1 1.763843216 2.43886688 2.335236373 1.105835029 1  
 1.064416691 1.264699285 1.154262498 0.998928669 1.071329216 1  
 0.848151139 1.328277789 1.034034078 1.096125071 1.283517101 1  
 1.056708674 1.244085677 1.088278389 1.490370041 1.351764958 1.541098232  
 YMR152W "YMR152W::YIM1::Mitochondrial inner membrane protease, similar to E.  
 coli leader peptidase" 1 1.452274873 1.578894318 1.589742427 1.78224635 1  
 1.485065554 1.746452342 1.480297182 1.475996089 1 1.267845433  
 1.868660005 1.736142963 1.426485065 1 1.609465535 1.522731435  
 1.376662701 1.608165217 1 1.490469995 1.069437504 1.597657344  
 1.281889717 1 1.008561739 1.802161735 1.428138675 0.889306824  
 1.097092009 1 1.073434281 1.488917775 1.265623169 0.958534581  
 0.930914374 1 1.010117056 1.363304068 1.186036952 1.244972835  
 1.565395713 1.359844049  
 YMR154C YMR154C::RIM13::Regulator of IME2 (RIM) 1.007192789  
 0.768702164 0.877744639 0.732268837 0.882620679 1.006117921  
 0.718139154 0.823952317 1.018759074 0.998484854 0.989757915 1  
 3.545110787 1.44238376 1 0.994396657 1.827913641  
 0.938116572 0.872540161 1.045687376 1.012215449 1.018111818 1  
 0.852989465 0.873688062 0.845534907 0.856565514 0.682506787 1  
 0.725410687 0.68779749 0.855362285 0.96498245 0.810388991 1.043743836  
 YGR098C YGR098C::ESP1::Esp1 promotes sister chromatid separation by  
 mediating dissociation from the chromatin of the cohesin Scc1. The anaphase-  
 promoting complex promotes anaphase by mediating destruction of Pds1 which binds  
 to Esp1 and inhibits its activity 1 1.252168128 1.370183114 1.513475292  
 1.462508021 1 1.371728273 1.312092548 1.252559287 1  
 1.248527388 1.337750777 1.173319435 1.263419657 1  
 1.145082312 1 0.888712915 1.049170579 1  
 0.327428419 0.526243454 0.56969305 0.684682105 2.371983675  
 1 0.767574371 0.821378412  
 YGR098C YGR098C::ESP1::Esp1 promotes sister chromatid separation by  
 mediating dissociation from the chromatin of the cohesin Scc1. The anaphase-  
 promoting complex promotes anaphase by mediating destruction of Pds1 which binds  
 to Esp1 and inhibits its activity  
 1 1.248357251 1.19217282 1.431706319  
 1.812225987 1.357078611 1 0.853990471 0.530864493 0.671212388  
 0.738202059 0.33455715 1 0.770014677 0.591031231 0.811248711  
 0.618868011 0.877617362 0.612061177  
 YGR100W YGR100W::MDR1::Mac1-dependent regulator 1 1.266419133  
 1.264775434 1.579283476 1.337352084 1 1.471249757 1.461223377  
 1.231242486 1.203853502 1 1.291101664 1.388923398 0.906458708  
 1.329604043 1.861432 1.225456997 0.777043932 1  
 0.831292121 1 1.057487749 1.275092674 1.178082532  
 0.867171402 0.981939536 1 1.14871958 1.082432154 1.300693073  
 0.931960225 0.85079192 1 1.405353928 1.287529566 1.130002487  
 1.032543933 1.316716912 1.048997512  
 YGR102C YGR102C::YGR102C::molecular\_function unknown 1 1.321604789  
 1.487140559 1.380025735 1.925473149 1 1.195078959 1.206256232  
 1.49773525 1.634305324 1 0.974958456 1.229653798 1.553328651  
 1.380069867 1 1.105483015 0.800284356 0.869962108 1.717282565 1  
 1.248739106 1.072349182 1.442016199 1.120658654 1 0.994090623

0.904724654 0.731294187 0.930485798 1 1.073207578  
 1.246295679 0.992866594 1.454801435 1 1.073551388 0.99698858  
 1.39265958 1.303626974 1.128679366  
 YGR104C YGR104C::SRB5::subunit of RNA polymerase II holoenzyme/mediator  
 complex 1 0.827428532 0.941162982 0.963748874 1.315740168 1  
 1.004382319 1.012044138 1.109310267 1 0.84541387 0.87965654  
 0.976722285 0.953113901 1 0.915573423 0.733954384 0.98875158  
 1.206283739 1 1.183695978 1.382105268 1.601990441 1.726508002 1  
 1.011792389 1.138488844 0.998848029 0.8863153 1.034881377 1  
 0.846504189 0.950847128 1.02800077 0.84748002 1.131068862 1  
 0.977769303 0.885818806 1.102292611 0.974069035 1.46328556 0.950927634  
 YGR118W YGR118W::RPS23A::Homology to rat S23 and E. coli S12 1  
 1.28110918 1.248056545 1.153953604 2.027720905 1 1.062659239  
 0.965377083 1.611819964 1.344432441 1 0.819803833 0.885003573  
 0.752333763 1.13545246 1 0.707596655 0.344919939 0.274712157  
 0.80559428 1 1.483845674 0.87075728 0.662329851 1.277404839 1  
 1.305494735 1.157756861 0.757683364 1.135505007 1.238406519 1  
 1.220063174 1.561294825 1.219933387 0.686383629 2.014715452 1  
 1.249917415 1.363915792 0.769442544 2.07571897 1.192668766 1.363346604  
 YGR120C YGR120C::COG2::<b><u>C</u></b>onserved <b><u>O</u></b>ligomeric  
 <b><u>G</u></b>olgi complex <b><u>2</u></b><br> Secretion deficient 1  
 1.536598182 1.432274841 1.47695216 1.919838205 1 1.432450964  
 1.457966745 1.781206855 1 1.270101455 1.172562234 1.257568398  
 1.286793821 1 0.683669508  
 1 1.262970804 1.143482407 0.952601216 1.015927852 0.957614719 1  
 0.908733544 1.056964083 1.097027276 0.963297088 1.146174048 1  
 1.095240518 1.070863983 0.924710778 1.167223569 0.960425771 1.196977994  
 YGR122W YGR122W::YGR122W::molecular\_function unknown 1 1.045919807  
 1.013948914 1.299248917 1.011251665 1 1.151616686 1.071249006  
 1.026506245 1 1.034241959 1.040462439 0.82842656 1.044125785 1  
 1.664304754 1.359402351 1.397574203 1.096247886 1 0.947829364  
 0.939097013 1 1.02776636 1.156082954 1.101340695 1.004439034 1  
 0.978067223 1.080393352 1.296555799 1.00987016 1.190876053 1  
 1.275751987 1.006612835 1.114755452 0.898423481 0.725892293  
 YGR124W YGR124W::ASN2::Asn1p and Asn2p are isozymes 1 0.956200635  
 0.638575257 1.124830221 0.534906845 1 1.205429197 1.074328005  
 0.63109626 0.681935917 1 1.020782282 0.98147785 0.497957361  
 0.664358526 1 1.310299059 1.157084444 0.940362113 0.626527657 1  
 0.634538192 0.330290327 0.3428646 0.464590135 1 0.96976247  
 0.986191716 1.660030385 1.264980237 0.79113135 1 1.22628253  
 0.94524322 1.329180542 0.708347633 0.318448557 1 1.132542759  
 0.878061743 0.961839175 0.637227138 0.658328834 0.858987149  
 YGR126W YGR126W::YGR126W::molecular\_function unknown 1 1.190313159  
 1.289297672 1.338664163 1.40697763 1 1.282064992 1.384996801  
 1.16232084 1.264992117 1 2.195347165 2.198487741 1.593909489  
 1.733538129 1 1.164800757 0.837110151 1 0.623173125  
 0.460544259 1 0.616888505 0.857575872 0.839903764 0.733198183  
 0.701882087 1 0.638708633 0.46082832 0.591379564 0.941203859 1  
 0.567557379 0.497366151 0.550164887 0.498469515 0.676857354  
 YGR128C YGR128C::UTP8::part of small (ribosomal) subunit (SSU) processosome  
 (contains U3 snoRNA) 1 0.993705401 0.826166328 1.217987209 1.128984306 1  
 1.049195499 0.881600965 0.964141007 1.032736399 1 0.656642493  
 0.620395159 0.448352666 1.07503951 1 0.495902161  
 0.595682417 1 0.361089022 0.326214257 1 0.914690969  
 0.647516863 0.752494934 0.82338351 1.024093304 1 0.82482555  
 0.672351618 0.596902213 0.957271009 0.670523242 1 0.741290908  
 0.8103948 0.649914748 1.23427103 0.62151559 0.830967177

YMR156C YMR156C::TPP1::Three Prime Phosphatase 1 0.93085295  
0.846141741 0.772638869 0.939810219 0.801501937 0.698570927  
0.844012292 0.877230413 0.802950922 0.959349325 1.180251649  
0.990736833 1 1.203927433 7.155627292 1.170550959 1.007051066 1  
3.130529829 3.567713174 2.779488204 1.908035239 1 0.966588519  
1.107256956 1.044923273 0.846106654 0.967975062 1 1.01352214  
1.351286023 1.45451631 1.190830869 1.187101456 1 1.271160863  
1.67131222 1.327308568 1.54453154 1.492647605 1.23112736  
YMR158W YMR158W::YMR158W::molecular\_function unknown 1 0.630804593  
1.030729038 0.910180635 1.287282792 1 0.745704749 0.926605052  
1.107319994 1 0.785116069 0.924812644 1.297122292 1.03987831 1  
1.134690791 1.208350459 0.80530675 1.274388055 1.111509706  
1.056464599 0.846877369 1 0.945633074 0.524380892 0.544283762  
0.920325985 1 1.406808996 1.806065833 1.332265401 1.329503521  
2.461862478 1 1.230500296 1.569479098 1.030447318 1.44600365  
1.721142486 1.557735134  
YMR176W YMR176W::ECM5::ExtraCellular Mutant 1 1.557688877 1.296126293  
1.670077124 1.122970056 1 1.542530012 1.533921137 1.193341206  
0.977130012 1 1.352361221 1.63037374 0.940762513 1.446145952  
1 0.870830733  
0.886363338 0.989721965 0.919403755 0.89679507 1 1.382585478  
1.200425926 0.831714043 1.237734022 0.915961938 1 1.015206484  
1.085517639 0.99172969 0.882809441 0.980850396 1.029733823  
YMR176W YMR176W::ECM5::ExtraCellular Mutant  
0.740740019  
0.727781536 1 1.991391581  
2.587468853  
YMR178W YMR178W::YMR178W::molecular\_function unknown 1 1.536826969  
1.312072712 1.380971113 1.680464447 1 1.248737682 1.345374386  
1 1.169819883 1.384810614 1.256250069 1.27746398 1.028441198  
1.01242753 1 1.331701534  
1.37066124 1.407875085 1.280096454 1.462685826 1 0.989685708  
1.219460724 1.260861322 1.069193276 0.943726103 1 1.248834905  
1.303225889 0.966322191 1.317004274 1.324150164 1.63916811  
YMR178W YMR178W::YMR178W::molecular\_function unknown 1 1.031715986  
1.237890724 1.049856212 1.49675654 1 1.024217193 1.018691723  
1.377893094 1.324061301 1 0.97977425 1.23957621 1.372166698  
1.261930894 1 1.185660677 0.947518605 0.979015416 1.685948895 1  
1.34885987 2.032743476 2.136972131 1.10796393 1 1.235094986  
1.208376322 1.506715313 1.506393637 1.306231108 1 1.11049948  
1.243568707 1.168314168 1.168972699 0.968561622 1 0.991455533  
1.208473273 0.917966912 1.056696966 0.74193063 1.390490964  
YMR180C YMR180C::CTL1::CET1-Like Gene #1 (CET1 = capping enzyme  
triphosphatase 1) 1 0.894751217 1.02053384 0.990384729 1.1897324 1  
0.931416954 0.916927008 1.39948701 1.249447447 1 0.759544498  
0.935760863 1.431081455 1.094087667 1 0.935465551 0.905946972  
1.451128475 1.98641491 1 1.697132101 3.191659828 1.840561865  
1.395764946 1 1.021373277 1.214437262 1.232372859 1.061010629  
1.276492665 1 0.857134871 1.241382122 1.03424198 1.140551902  
1.281612653 1 0.939251264 1.245794479 1.279330884 1.89333003  
1.431227218 1.422013335  
YMR182C YMR182C::RGM1::Putative transcriptional repressor with proline-rich  
zinc fingers 1 0.9828848 1.068881763 1.173415559 0.909889759 1  
1.24841282 1.017525833 1.327147561 1.242312883 1 0.950145486  
0.978778775 1.252470538 1.166753456 1 0.968546547 1.749584924  
1.934632677 0.771320584 1 0.627705798 0.629370952 0.376896533

0.300393475 1 0.965146463 1.114605396 1.030051647 1.382575683  
 1.059930607 1 0.725426943 0.613131399 0.633110637 1.153042788  
 0.668596082 1.030602338 1.08993997 1.279381855 1.074418571  
 1.388186158 0.945673958  
 YMR184W YMR184W::YMR184W::molecular\_function unknown 1 0.774919899  
 1.237850448 0.86832515 1.572131015 1 0.929824649 1.045671534  
 1.532219916 1 0.761731872 1.127637251 1.766217143 1.319944406 1  
 1.206152625 0.907694338 0.678646629 1.987349831 1 2.192430015  
 3.569382899 2.236345832 1.493018307 1 0.896845383 1.05176778  
 0.873603903 0.883555443 0.988804464 1 0.898323035 1.192098457  
 1.055857554 1.073824826 1.407794044 1 1.181044273 1.370794657  
 1.024766777 1.566618417 1.563798889 1.219744238  
 YMR186W YMR186W::HSC82::constitutively expressed heat shock protein 1  
 0.890697544 0.874635185 1.467987701 0.90273619 1 1.195975748  
 1.438340035 0.802261563 0.811778974 1 0.763502345 0.967335395  
 0.823676155 0.621622815 1 1.614147398 1.772786315 2.490672595  
 1.673607762 1 1.140609549 0.526256408 0.99402381 1.485643109 1  
 1.254140162 1.167548358 1.255070485 1.05734444 1.224099084 1  
 1.829561028 0.820806225 0.568465027 0.316870291 0.241827906 1  
 1.306080356 0.852174226 0.517523751 0.462304602 0.671378608 0.516618137  
 YMR202W YMR202W::ERG2::sterol biosynthesis 1 1.141366959 1.132865514  
 0.842995613 0.851996719 1 0.873587961 1.229558456 1.104655461 1  
 0.935794882 0.982613399 0.989804069 0.806441274 1 0.667472641  
 0.417928607 0.373733174 0.530395505 1 1.355393439 1.031979912  
 1.089520906 0.898721026 1 1.201844518 0.881877364 1.442591938  
 2.071115453 1.384197758 1 0.790987219 0.550390171 0.499674576  
 1.091424102 1.209037489 1 0.864193995 0.457612237 1.143368536  
 0.884877876 0.661657969 1.107664347  
 YMR204C YMR204C::YMR204C::molecular\_function unknown 1 1.038823079  
 1.244097638 1 0.93179268 1.031302201 1.034624707 1  
 1.038055341 1.110137912 1.001644595 1.043518861 1 1.043127009  
 0.551294285 0.688291783 0.66844599 0.426085118 0.385785554  
 0.391368256 1 1.187103147 1.211728707 1.073004354 1.352785855 1  
 0.953498517 0.796558003 1.086849331 1.008235756 1 0.867906869  
 0.850778348 0.989740717 0.914012135  
 YGR142W YGR142W::BTN2::Gene/protein whose expression is elevated in a btn1  
 minus/Btn1p lacking yeast strain. 1 1.235598522 1.515070988 1.414148381  
 1.442153105 1 1.299652263 1.290375192 1.214247225 1.207991551 1  
 1.023987154 1.959778212 1.656400059 1.078842076 1 2.999519947  
 3.248572866 3.090054281 1 1.151767972 1.321063595 1.607585688 1  
 2.063893028 1.883551543 0.943763115 0.693464213 1.027733731 1  
 5.352145105 0.761041423 0.587601234 0.43707289 0.634549291 1  
 3.742685028 0.977320239 0.695544828 1.094411265 1.408329583 1.06738564  
 YGR144W YGR144W::THI4::Protein highly expressed in early stationary phase  
 during growth on molasses 1 1.581071263 1.189695164 1.24050304 1  
 1.316054554 1.240417572 1.161488631 1.495128747 1 1.147247497  
 1.17275269 1.401627245 1.542374507 1 1.355102375  
 3.405451724 1 0.923346176 1.33787061 1.411522508 1.588095762 1  
 1.061839011 1.086473676 1.282043097 0.956786433 0.937918822 1  
 0.383914229 0.559789077 0.901440768 0.764772489 0.601673656 1  
 0.892770181 1.122617124 0.835337335 1.013768433 1.033236274  
 YGR146C YGR146C::YGR146C::molecular\_function unknown 1 1.421475345  
 1.109739589 1.056282887 1.393892964 1 0.957377288 1.010342678  
 0.912849952 0.985906015 1 1.426279883 1.583484684 1.469466811  
 1.266317589 1 1.556257262 1.849373681 2.305326041  
 0.695007702 0.651921682 0.565790123 0.549002665 1 2.544929437  
 2.632295623 2.245974459 1.247123254 0.860641133 1 1.499953347

2.472234744 3.155182386 2.46516603 1.591372185 1 1.904224158  
2.259675407 0.867787288 1.282916441 0.699139619 0.829215951  
YGR148C YGR148C::RPL24B::Homology to rat L24 1 0.963583846  
1.329755662 0.872516246 1.869431315 1 0.961167078 0.989813235  
1.324187728 1.283059284 1 0.833226647 0.874334331 0.781217437  
0.965137163 1 0.733629675 0.335094429 0.190927789 0.566440151 1  
1.361131408 0.970315569 0.590957143 0.720308274 1 1.108701205  
1.049925136 0.70874458 0.863911339 1.117628803 1 1.471345129  
1.845161136 1.171543921 1.04372892 2.091825966 1 1.121259932  
1.193477232 0.66470842 1.595346944 1.026446522 1.26089861  
YGR150C YGR150C::YGR150C::molecular\_function unknown 1 1.605816068  
1.602575588 1.7246004 1 1.728313437 1.428773274  
1.634747418 1 1.472557474 1.567069513 2.102432559 1.829161764  
1 1.005423739 1 1.294873923  
0.959143132 0.987542597 1.066557627 1.268032639 1 1.063616227  
0.762111612 1.304089196 0.937649332 1.229298649 1 0.960855743  
1.008629598 0.567626511 1.299931002 0.738819391 0.950927634  
YGR152C YGR152C::RSR1::Gtp-binding protein of the ras superfamily involved  
in bud site selection 1 0.986349811 1.115304088 1.05253235 1.662696313 1  
1.014346163 1.225224053 1 0.712168765 0.695194542  
0.772217772 1.31133447 1 0.732179212 0.489987027 0.430635853  
0.942497376 1 1.343039314 0.835919545 1.594261462 1  
0.80019485 0.862533645 0.657355251 0.548959371 0.989052035 1  
0.995077059 1.15360217 1.071861732 1.155681532 1.214499417 1  
1.11596265 1.31718109 1.156186314 1.499979367 1.280521617 1.353714707  
YGR166W YGR166W::KRE11::Involved in biosynthetic pathway for cell wall beta-  
glucans 1 1.204969351 1.216973979 1.362138635 1.186386554 1  
1.378231975 1.429957821 1.207830949 1 1.343392883 1.272433501  
1.299128841 1.167795577 1 1.019451617 0.968871403 1.326902272  
1.313871516 1 0.724405077 0.916612413 0.481037648 0.666028195 1  
1.271637182 1.103693613 1.250716015 1.397030542 1 0.786144639  
0.568299125 0.719118157 0.774045972 0.698756997 1 0.899920198  
0.704006311 0.865447009 0.796854546 0.818467928 0.573533695  
YGR168C YGR168C::YGR168C::molecular\_function unknown 1 0.945209566  
0.980120209 1.020091769 1.213752731 1 1.06202388 0.956667447  
1.127811028 1 0.871952478 0.964962005 1.080578418 1.096445648 1  
1.014022181 1.266425769 1.127744829 1.777411043 1 1.798330557  
2.200898604 1.719639036 1 0.884210629 0.939499799 0.718522274  
0.656267275 0.956712701 1 0.923501394 1.056068304 1.031785436  
0.943301641 1.414277252 1 1.15719649 1.128639236 0.967321128  
1.099920411 1.491183428 1.424640225  
YGR170W YGR170W::PSD2::converts phosphatidylserine to  
phosphatidylethanolamine 1 1.055514076 1.227428071 1.381851735  
0.997264472 1 1.365499785 1.558480548 1.089133205 0.93114062 1  
1.151403178 1.311981177 0.72938864 1.115267142 1 1.184082256  
1.792755244 0.950546791 1 1.149536871 0.711689692 1  
0.977241365 1.074953783 0.998816264 1.004994154 1.09277564 1  
1.114114173 0.855077179 1.292573975 1.233400948 0.899392886 1  
1.022995239 0.937413364 1.046112437 0.855665924 1.359120954 0.891385238  
YGR172C YGR172C::YIP1::Golgi integral membrane protein; binds to the  
transport GTPases Ypt1p and Ypt31p 1 1.264460044 0.959589575 0.883285217  
1.075313136 1 0.905184063 0.808794781 0.960698011 0.944983974 1  
1.079381325 0.826596701 0.85498012 0.846089903 1 0.900084011  
0.59101821 0.647290597 0.802713603 1 0.762157364 0.550400863  
0.583523628 0.705454676 1 1.183996788 1.186316556 1.290405147  
1.435648373 1.028516558 1 1.018701885 1.228604267 1.223351622



0.768647217 0.745592003 1 1.071644665 1.031941178 1.135651111  
0.771151408 1.098032451

YMR206W YMR206W::YMR206W::molecular\_function unknown 1 1.44852929  
1.948547236 1.402703645 1 1.845190426 1  
1.379959528 2.267101193 4.323974915 1.653747546 1 1.598954379  
0.298026766 0.708752044 0.331575878 1 1.042412265  
0.989465965 1.132802254 1.406887333 1 0.737607271 1.220818387  
1.775895511 1.814305713 1 0.748132465 0.871579213 0.966071091

YMR208W YMR208W::ERG12::mevalonate catabolism 1 1.196530956  
0.929028432 1.046514413 0.792435442 1 1.096158843 1.143784137  
0.934263082 0.937645317 1 1.244030918 1.062419706 0.854764444  
0.882221555 2.192766846 1.166286497 1.338427019 0.840307691  
1 0.836739205 0.758416063 0.743199721 0.889348118  
0.925829456 1 0.762990604 0.571443842 0.667027837 0.892461138  
0.703793255 1 0.793736715 0.610115073 0.868049854 0.810149816  
0.691027011 1.008718805

YMR210W YMR210W::YMR210W::molecular\_function unknown 1 0.976993652  
1.025833086 1.012060208 1.093018526 1 1.032862928 0.995362027  
1.289754439 1.022083635 1 1.211478929 1.272664236 1.299636762  
0.945533398 1 1.974174498 1.068113414 1.470754404 1.060585378 1  
1.520740341 1.509223022 1.325929246 0.93223246 1 1.257762784  
1.171492899 1.430391557 1.318838995 1.144865192 1 0.862758255  
0.990352286 0.767091999 0.7240616 1 0.898668795 0.733395793  
0.763225124 0.692924052 0.777569774

YMR212C YMR212C::EFR3::PHO\_Eighty\_Five\_Requiring 1 1.24799184  
1.020912577 1.35445068 1.011356944 1 1.368930419 1.201889154  
1.192972417 0.976940358 1 1.093358445 1.022523467 0.921384448  
1.226645589 1 0.790745369 0.708871395 0.65229978 1  
1.161850081 1.335860851 0.979937291 0.550581982 1 0.915801789  
0.906097392 1.061738608 1.326750486 1.122520162 1 0.982361709  
0.77305915 0.766375263 0.544549903 1 0.998897151 0.622187589  
0.881960209 0.758203822 0.583244914 0.492100668

YMR227C YMR227C::TAF7::TFIID subunit (TBP-associated factor) with predicted  
molecular weight of 67 kD 1 1.194043417 1.300557658 1  
1.280006072 1.116941377 1 0.994936052 1.177235658  
0.951015696 1.420962736 1 0.700190961 0.824373328 1  
0.878649956 1 0.660570484 0.559856103 0.632275915  
0.56594735 0.698851377 1 1.007350715 0.852603295 1.222307488  
1.869668356 0.863665365 1 0.765209444 0.947381749 0.675149868  
0.800499125 0.455861445 0.673354851

YMR229C YMR229C::RRP5::Part of small ribosomal subunit (SSU) processosome  
(contains U3 snoRNA). Rrp5p is the only ribosomal RNA processing trans-acting  
factor that is required for the synthesis of both 18S and 5.8S rRNAs. 1  
1.07427426 0.836148082 1.400685263 0.820294511 1 1.238944983  
1.023892305 0.939526112 0.955144562 1 0.928138924 0.798016224  
1 0.777474982 1.241516138 1.080924399 0.548322641  
0.704477965 0.657722249  
1.244015226  
1.576123158

YMR229C YMR229C::RRP5::Part of small ribosomal subunit (SSU) processosome  
(contains U3 snoRNA). Rrp5p is the only ribosomal RNA processing trans-acting  
factor that is required for the synthesis of both 18S and 5.8S rRNAs.

1

0.595189636 0.510925219 0.72544826 0.810166577 0.776264582 1

0.85186496 0.486785444 0.468315175 1.175433916 0.449665468 1  
 0.649134812 0.545241791 0.992507025 0.909033867 0.459988618 0.624319912  
 YMR232W "YMR232W::FUS2::Involved in cell fusion during mating, also required  
 for the alignment of parental nuclei before nuclear fusion" 1 1.443323882  
 1.483717984 1.419080878 1 1.33121195 1  
 0.980299813 1.269200659 1.552328474 0.399277155  
 0.452473366 0.228176726 1 0.937281424  
 1.067981947 1.100028764 0.881709503 1 0.849581192 1.08499006  
 0.946456837 0.882555053 1.008265178 1 1.017466012 1.013668137  
 1.057346817 0.767237544 0.816742994 0.919405158  
 YMR234W YMR234W::RNH1::ribonuclease H 1 0.901488447 1.026918469  
 0.952205615 1.108602542 1 0.851111229 0.928364394 1.237071041  
 1.109372114 1 0.731007388 0.803340808 0.844912557 0.939921346 1  
 0.763738465 0.551392814 0.515144156 0.75972325 1 1.364002688  
 1.132956384 1.229666602 1.585407967 1 0.901078643 1.038543282  
 0.934418414 0.877967492 1.041726305 1 0.973953428 0.927119059  
 0.788060722 0.828673188 1.276341259 1 1.043908285 0.806454199  
 0.941531214 1.043953282 0.919711719  
 YMR236W YMR236W::TAF9::TFIID subunit (TBP-associated factor) with predicted  
 molecular weight of 17 kD. 1 1.372119228 1.778258134 1.408232097  
 1.789277822 1 1.316150072 1.377717362 1.788566894 1.79940682 1  
 1.510185233 1.474724525 1.707050584 1.435127103 1 0.863859566  
 0.574310124 0.69743557 0.906567058 1 2.001258925 1.427291989  
 1.583023426 1.828250604 1 1.149125188 1.220492227 1.24962484  
 1.041874091 1.136210818 1 0.971650581 0.943346459 0.935282194  
 0.835970054 0.848074663 1 0.817094197 0.779376779 0.924596758  
 0.817194491 0.789743277  
 YMR238W "YMR238W::DFG5::Protein required for filamentous growth, cell  
 polarity, and cellular elongation" 1 1.259795608 1.148196252 1.244120636  
 0.996767336 1 1.217688121 1.21120594 1.220586275 1.079790185 1  
 1.152609132 1.028293744 1.131700866 1.187869107 1 1.184804836  
 0.861748908 0.764070677 0.806830126 1 0.914507153 0.697316052  
 0.571438012 0.763240295 1 0.909716888 0.97019104 1.35827103  
 1.19733662 1.166874552 1 1.075055971 0.963102436 1.113353149  
 1.059728019 0.783398866 1 0.891772434 0.870977849 0.924897579  
 0.882023154 0.979111861 0.888758347  
 YGR174C YGR174C::CBP4::Essential for the expression and activity of  
 ubiquinol-cytochrome c reductase 1 1.093574753 1.806302852 1.478597521  
 2.213214259 1 1.412029939 1.716546356 2.353577479 2.16310317 1  
 0.943159674 1.358834289 3.300212862 1.544011993 1 1.225708537  
 0.814010361 1.11402522 2.213692604 1 1.780713039 1.861149688  
 3.181824903 1.700625402 1 0.813910288 0.664404963 0.436419605  
 0.761724949 1.020147471 1 0.993385503 0.536912573 0.512747774  
 0.669202697 1.826380793 1 0.815874081 0.580236026 1.652070292  
 1.746101394 1.352839042  
 YGR176W YGR176W::molecular\_function unknown 1 1.462665671  
 1.395790427 1.059119313 1 1.269686867 1.016103684 1.201592254  
 1 0.869039566 0.807834874 0.938109214 0.912023123 1  
 0.570544125 0.307340086 0.478597735 0.227769888 1  
 0.719229461 0.651158469 1.322217147 1.926700745 0.968076865 1  
 0.390902493 0.491326406 0.629607682 1.595729075 1.58349705 1  
 0.627206489 0.691194815 1.509222065 0.641075474 0.969315762  
 YGR190C YGR190C::molecular\_function unknown 1 0.758841535  
 0.613563961 0.921152086 0.60563799 1 0.959498169 0.958198861  
 0.604915827 0.612247237 1 1.141453256 0.868056163 0.255313946  
 0.742879968 1 0.686695387 0.532600363 0.643438922 0.402313661 1  
 0.638346386 0.696503889 0.310512442 0.483990003 1 1.049797474

|         |                                                                                                                                                                          |             |             |             |             |             |
|---------|--------------------------------------------------------------------------------------------------------------------------------------------------------------------------|-------------|-------------|-------------|-------------|-------------|
|         | 0.822651879                                                                                                                                                              | 0.793439418 | 1.371923112 | 0.931406473 | 1           | 0.755626069 |
|         | 0.349489165                                                                                                                                                              | 0.662618905 | 1.040408483 | 0.326854857 | 1           | 0.514093744 |
|         | 0.384838858                                                                                                                                                              | 0.816517357 | 0.518465133 | 0.630008902 | 0.443065729 |             |
| YGR192C | YGR192C::TDH3::Glyceraldehyde-3-phosphate dehydrogenase 3                                                                                                                |             |             |             | 1           |             |
|         | 1.403083016                                                                                                                                                              | 0.989402983 | 0.928856222 | 0.775954238 | 1           | 1.248793852 |
|         | 1.111433216                                                                                                                                                              | 0.721508476 | 0.821377379 | 1           | 1.416044425 | 1.63101427  |
|         | 1.667220123                                                                                                                                                              | 0.994652584 | 1           | 1.352397    | 1.52715632  | 2.258283753 |
|         | 1.300675211                                                                                                                                                              | 1           | 1.534377678 | 0.659592504 | 0.781844533 | 1.494850081 |
|         | 1.224891789                                                                                                                                                              | 1.06616775  | 2.077204911 | 1.519653488 | 1.143435745 | 1           |
|         | 1.461459854                                                                                                                                                              | 1.364467971 | 1.743853511 | 1.196416482 | 0.802924323 | 1           |
|         | 1.222039979                                                                                                                                                              | 1.278050995 | 1.570884316 | 1.026775536 | 1.162209635 | 1.319565341 |
| YGR194C | YGR194C::XKS1::Xylulokinase 1                                                                                                                                            |             |             |             | 1           | 1.149829681 |
|         | 1.226387096                                                                                                                                                              | 1.220824476 | 1           | 1.26776173  | 1.175512464 | 1.012217021 |
|         | 1.046792604                                                                                                                                                              | 1           | 1.297260785 | 1.211451362 | 0.827897457 | 1.090731071 |
|         | 0.751087795                                                                                                                                                              |             |             |             | 0.897929827 | 1           |
|         | 1.015737897                                                                                                                                                              | 0.919940322 | 1.346427084 | 1.11973784  | 1.023982688 | 1           |
|         | 1.04443612                                                                                                                                                               | 1.013122318 | 0.822934616 | 0.969844843 | 0.969257717 | 1           |
|         | 1.001700448                                                                                                                                                              | 1.156974086 | 1.44101549  | 1.222436978 | 1.108049367 | 0.921156488 |
| YGR196C | YGR196C::FYV8::Function required for Yeast Viability on toxin exposure                                                                                                   |             |             |             | 1           | 0.868311231 |
|         | 1.039118437                                                                                                                                                              | 1.199118399 |             | 0.997392692 | 1           | 1.037080555 |
|         | 0.95199355                                                                                                                                                               | 1.258442844 | 1           | 0.992516387 | 0.626721623 | 0.784844414 |
|         | 1.06864838                                                                                                                                                               | 1           | 1.29633949  | 1.365102444 | 1.185469503 | 0.899643727 |
|         | 0.932758874                                                                                                                                                              | 0.956248441 | 0.814748399 | 0.932487664 | 0.935438325 | 1           |
|         | 1.216587642                                                                                                                                                              | 0.934110769 | 1.160764931 | 1.19937596  | 0.777557707 | 1           |
|         | 1.072483605                                                                                                                                                              | 0.80822836  | 1.048780203 | 0.91353322  | 1.129571044 |             |
| YGR198W | YGR198W::YGR198W::molecular_function unknown                                                                                                                             |             |             |             | 1           | 0.769134962 |
|         | 0.779259748                                                                                                                                                              | 0.97540368  | 0.794814407 | 1           | 0.902671791 | 0.961851489 |
|         | 0.703067033                                                                                                                                                              | 0.65225626  | 1           | 0.85534595  | 0.855196835 | 0.485656004 |
|         | 0.852367451                                                                                                                                                              | 1           | 0.720020763 |             | 0.871754321 | 0.852170236 |
|         | 0.834191365                                                                                                                                                              | 0.786290745 | 0.82296047  | 1           | 1.089535792 | 1.059775311 |
|         | 1.013496268                                                                                                                                                              | 1.010185714 | 1.111043176 | 1           | 1.221290244 | 0.841443486 |
|         | 1.169769863                                                                                                                                                              | 0.753004223 | 0.647690769 | 1           | 1.264607794 | 1.069328916 |
|         | 1.021198784                                                                                                                                                              | 0.885721603 | 0.920769752 |             |             |             |
| YGR200C | YGR200C::ELP2::ELongator Protein 2; 90kD subunit; has WD40 repeats                                                                                                       |             |             |             |             |             |
|         | 1.220205413                                                                                                                                                              | 0.831337162 | 1.270213898 | 0.884009004 |             | 1.210728    |
|         | 0.92593602                                                                                                                                                               | 0.854612075 | 1.029630569 |             | 0.869260691 | 0.566936326 |
|         | 0.572597351                                                                                                                                                              | 1.054371174 | 1           | 0.288554847 | 0.212727474 | 0.262586905 |
|         | 0.368273981                                                                                                                                                              | 1           | 0.471825114 | 0.642443447 | 0.371349176 | 0.611950531 |
|         | 0.993769822                                                                                                                                                              | 0.7198233   | 0.833596194 | 1.273329998 | 0.990937467 | 1           |
|         | 0.806939262                                                                                                                                                              | 0.509761338 | 0.443273383 | 0.695620779 | 0.635322179 | 1           |
|         | 0.627669724                                                                                                                                                              | 0.509459575 | 0.744708187 | 0.84834903  | 0.418506575 | 1.129554927 |
| YGR214W | YGR214W::RPS0A::Homology to rat Sa                                                                                                                                       |             |             |             | 1           | 1.265864257 |
|         | 0.902581893                                                                                                                                                              | 1.116027167 | 1           | 1.115218674 | 1.045459711 | 0.853008106 |
|         | 0.899528396                                                                                                                                                              | 1           | 0.926631363 | 0.779422476 | 0.572913352 | 0.741770801 |
|         | 0.917775998                                                                                                                                                              | 0.404591657 | 0.303979309 | 0.532635739 | 1           | 0.744333058 |
|         | 0.350892536                                                                                                                                                              | 0.187540355 | 0.578471597 | 1           | 1.180620053 | 0.979766506 |
|         | 1.11055177                                                                                                                                                               | 1.214866471 | 1.18730781  | 1           | 1.389077174 | 1.058981231 |
|         | 0.883804714                                                                                                                                                              | 0.618217183 | 0.848994264 | 1           | 1.225942778 | 0.936262478 |
|         | 0.865555485                                                                                                                                                              | 1.2267606   | 0.920286999 | 1.034987604 |             |             |
| YGR216C | "YGR216C::GPI1::Participates in synthesis of N-acetylglucominyolphosphatidylinositol, the first intermediate in synthesis of glycosylphosphatidylinositol (GPI) anchors" |             |             |             | 1           | 1.198645379 |
|         | 0.961125616                                                                                                                                                              | 0.929052689 | 1           | 1.160393355 | 1.073400076 | 0.63869008  |
|         | 0.785066302                                                                                                                                                              | 1           | 0.934169051 | 0.794663435 | 0.63480442  | 0.717081096 |
|         | 1.032300682                                                                                                                                                              | 0.699527542 | 1.030335481 | 0.814151444 | 1           | 0.588999099 |
|         | 0.717327326                                                                                                                                                              | 0.690373541 | 0.520928092 | 1           | 1.072724614 | 0.830323923 |

0.852322332 1.047505886 0.882178729 1 0.814927181 0.706512354  
0.653251023 0.596692767 0.603675358 1 0.919244281 0.817952915  
0.807742097 1.176985689 0.798927604 1.156699286  
YIL015CA YIL015CA::YIL015C-A::molecular\_function unknown 1 1.092313818  
1.290516208 1.094946883 1.756715181 1 0.956431153 1.285785317  
1.466614829 1 1.084768584 1.284036488 1.871318407 1.250233445 1  
1.402147929 1.243315831 1.014566033 1.387310609 1 1.202004186  
1.357699516 1.394651132 1.34413975 1 0.847258627 0.931083005  
1.072536091 1.072758234 0.954316312 1 0.905012002 1.007352857  
1.379678431 1.744145096 1.161146853 1 0.922566594 1.164401842  
1.352304868 1.219095626 1.718849964  
YMR255W YMR255W::GFD1::Great for FULL DEAD box protein activity 1  
0.690652814 1.194201518 0.882711629 1.464327352 1 0.95220658  
0.904053634 1.103164739 1 0.882600046 1.005565437 1.376836771  
0.959773864 1 1.065710976 0.795087694 0.756987425 1.535372301  
0.776499384 0.975086945 1.209118947 0.850138794 1 1.016400899  
1.175782935 0.766855963 0.645468275 1.119021361 1 0.857831974  
1.235088655 1.15396179 1.256769515 1.643788999 1 0.980152849  
1.176834612 1.389001702 1.568736402 1.403727975 1.432520897  
YIL082WA YIL082WA::YIL082W-A::molecular\_function unknown 1 1.03865897  
1.081380384 1.144976119 1.224369612 1 1.250702831 1.248607719  
1.086315063 0.945978244 1 1.05372801 1.288265351 0.893500895  
0.994751684 0.522613613  
1 1.084500152 1.005436402 1.1120545 1.051085115 0.945017754 1  
1.145353499 1.180191154 1.053577774 0.929875657 0.929674813 1  
0.991579985 1.065407198 0.990166801 0.990857339 0.917717365 0.933415171  
YMR258C YMR258C::YMR258C::molecular\_function unknown 1 1.372583358  
1.127885222 1.20838641 1.115948365 1 1.32994882 1.252069879  
1.359336616 1.073051871 1 1.727724802 2.074769355 1.748996192  
1.269598376 1 2.531906403 2.232291287 1.270381598  
0.975571945 0.975086945 0.688155879 0.634886247 1 1.205575639  
0.996928257 0.970589666 0.988321831 1.00225017 1 1.335971936  
1.577254016 1.006332807 0.860141774 1.400111249 1 1.465289907  
1.143932395 0.876862231 1.15124885 0.852722451  
YMR260C YMR260C::TIF11::Translation initiation factor eIF1A 1  
1.056027367 1.398326166 0.83618471 1.832675558 1 0.893467669  
0.868845382 1.502643396 1.327184219 1 0.925414319 1.032469073  
0.892637209 0.941122897 1 1.205386452 0.492159212 0.423197083  
0.729989153 1 1.650771422 0.988312465 0.842080625 0.956174419 1  
0.896247822 0.865843918 0.40202108 0.689340655 1.017252002 1  
1.441541645 1.1970343 0.615032031 0.712539008 2.073955991 1  
1.208002032 1.092116603 0.606637125 2.007560366 1.090835556 1.984164012  
YMR262W YMR262W::YMR262W::molecular\_function unknown 1 1.517229332  
1.501516238 1.360590894 1.094731235 1 1.343308826 1.504107049  
1.21187013 1 1.524613832 1.847500055 1.787328681 1.24554605 1  
2.514087611 2.903896718 2.215598516 1 2.366190341 1.4776515  
2.591707331 1.47844795 1 1.288532612 1.564142503 1.926780566  
1.287512413 1.349037444 1 1.269144057 1.075930952 1.415127887  
0.946607673 0.844243431 1 1.098166243 1.020232078 1.099944332  
0.934443919 0.979623655 0.959683866  
YMR264W YMR264W::CUE1::Cuelp assembles with Ubc7p. Cuelp recruits Ubc7p to  
the cytosolic surface of the endoplasmic reticulum. Assembly with Cuelp is a  
prerequisite for the function of Ubc7p 1 1.179104028 1.274426397  
1.084765052 1.248155783 1 1.024600415 0.996793932 1.755701407  
1.593517285 1 1.097480672 1.25433475 1.681814828 1.610644447 1  
1.330051519 0.946679221 1.025024692 1.273974933 1 1.489060885  
1.162614355 1.575863353 1.307442698 1 1.147984376 1.043954948

1.19319683 1.021570271 0.85778506 1 1.047202909 1.21822877  
1.228028157 1.364465316 1.393054505 1 0.949305803 1.178750842  
1.152219127 1.324719874 0.977439594 1.456162701  
YMR266W YMR266W::RSN1::overexpression Rescues sro7/sop1 in NaCl 1  
1.526518553 1.03661395 1.100103463 1 1.155136524  
1.181432602 1 1.425498873 1.479284548  
0.822849199 0.716071975  
0.840591249 0.862903936 0.889890967 1 1.011148911 1.087213894  
1.188263612 1 0.924285112 1.030551178 0.78425122 0.685663195  
1.087767397  
YMR281W YMR281W::GPI12::N-acetylglucosaminylphosphatidylinositol de-N-  
acetylase 1 1.23838721 1.432110519 1.143957666 1.651022042 1  
1.099970819 0.990586219 1.415578306 1.412877153 1 1.169220313  
1.348440056 1.802652509 1.298934828 1 1.226883006 0.917217101  
0.931953632 1.302740108 1 1.014569211 1.683992892 1.110884784  
0.885712918 1 1.394832699 1.186539221 0.948187981 0.836878072  
0.950532252 1 1.272654032 1.113775771 1.239012523 0.938719406  
1.217976035 1 1.39733357 1.18756013 1.02675319 1.166686459  
1.295844162 1.907984609  
YMR283C YMR283C::RIT1::Modifies initiator methionine tRNA to distinguish it  
from elongator methionine tRNA 1 0.928761106 0.901110223 0.867038379  
0.945234307 1 0.943091346 0.941141904 1 0.933816071  
0.932826988 0.944190935 0.880628215 1 0.917021373  
0.960824588 1 1.036907004 1.11481824 0.72908251 1  
1.004478573 0.853533811 0.969363334 1 0.713404422 0.815699865  
0.794363947 0.923870261 1 0.8959821 1.195340758 1.030491962  
1.128552465 1.122573319 1.36597339  
YMR285C YMR285C::NGL2::RNase; CCR4 C-terminal homolog; displays homology to  
drosophila Angelgene; homolog to ngl1 and ngl3 1 0.858916306 0.85646089  
0.932297917 0.949601995 1 0.981505869 0.791922541 0.855109123 1  
0.845001101 0.795467971 0.668530648 0.915677532 1 0.646712737  
0.493239682 0.512946323 0.680747359 0.863811895 0.84201893  
0.663924989 0.94037092 1 0.939210381 0.978208592 0.745413278  
0.854354963 0.996181711 1 0.969282185 0.908350435 0.922143418  
1.003030263 1.195332976 1 0.97984203 0.843259778 0.950839189  
0.93363554 1.275231969 1.58925761  
YMR288W YMR288W::HSH155 1 0.802688143 0.702058479 1.068635743  
0.773470122 1 1.201517521 0.974547765 1 0.799845914  
0.907826785 0.525807421 1.14115184 1 0.542554126 0.487251713  
0.360542533 1 0.968930563 0.920401  
1.0800385 0.994763452 1.062127934 1 0.957824008 0.93300552  
0.880841518 1.124693969 0.680500675 1 0.94444809  
0.593917064 0.699647657 0.828340286  
YGR218W YGR218W::CRM1::Involved in nuclear export 1 0.996400529  
0.737257117 1.258762366 0.749095316 1 1.267491382 1.146502923  
0.651475522 0.719632899 1 1.202877123 1.255742195 0.67990643  
1.101102438 1 1.059405035 0.915018666 0.882352822 0.562056723 1  
0.53665746 0.271134123 0.410454203 0.62565207 1 0.960627858  
0.933149264 0.973053488 1.303249638 0.952988749 1 1.043942682  
0.584005952 0.830216559 0.675767851 0.364161713 1 1.000746728  
0.710228056 0.928237214 0.668821992 0.760559986 0.720638564  
YGR220C YGR220C::MRPL9::Mitochondrial ribosomal protein MRPL9 (YmL9) (E.  
coli L3) (human MRL3) 1 1.122305715 1.351444506 1.314725363 1.82732271 1  
1.26687438 1.278018107 1.693315623 1 1.077567194 1.196116032  
1.397891666 1.281819737 1 1.403523788 1.145369563 1.029596181  
1.56439313 1 1.611674682 1.129825476 1.019573132 1.159127277 1  
1.270824794 1.331180596 1.038032612 0.963427557 1.014287298 1

1.19158136 1.166514057 1.013293403 0.854208844 1.240769486 1  
 1.124859289 1.229301442 0.97505983 1.580079505 1.120758711 1.442152689  
 YGR222W YGR222W::PET54::translational activator of cytochrome c oxidase  
 subunit III; required for splicing of cytochrome c oxidase subunit I mRNA 1  
 1.072003712 1.414341095 1.23437134 1.497142035 1 1.200507733  
 1.151612762 1.656852253 1.406594387 1 0.974201283 1.250420467  
 1.408063494 1.339795364 1 1.193758853 1.45408747 1.129986071  
 1.612731643 1 1.135508395 1.051680206 1.482870113 0.914985437 1  
 0.979876175 1.107201251 0.88246122 0.704658494 1.088901968 1  
 1.097038226 1.466900892 1.476012649 1.517832789 2.187883573 1  
 1.348310782 1.412367704 1.39832602 1.885420882 1.853565855 1.617277531  
 YGR224W YGR224W::AZR1::MFS-MDR 0.988723428 0.95319068 1.246732801  
 0.893798685 1.24826059 1.266434443 0.812212708 0.96024512  
 1.041666075 1.166661898 0.680105432 1.085698769 1.191316453  
 1.017807054 1 1.684241819 0.881093746 1  
 1.154313053 1.164179672 1.197832814 1.263356263 1 1.075233247  
 0.986457991 1.179890379 0.991020442 0.871287799 1 1.054989841  
 1.12541811 1.226485279 0.909105726 1.222120731 0.926410164  
 YGR238C "YGR238C::KEL2::protein containing kelch repeats, similar to YHR158c  
 and YPL263c" 1 1.111880399 0.990853188 0.777175156 1  
 1.297631968 1.282043196 1 1.309871221 0.949749357  
 0.85316473 1 1.03797762 1.598737628 1.259375981 0.859216045 1  
 1.158811663 0.790120807 0.741626813 1 1.100083586 1.333912469  
 0.974061855 1.272016691 1 1.150327274 0.973570902 1.026909401  
 1.297056895 1.062418063 0.885932871 1.034349455 0.917186594  
 1.202310385 0.849355305  
 YGR240C YGR240C::PFK1::phosphofructokinase alpha subunit  
 1.156178506 0.769840967 1.407745751 0.684299332 1.289425389  
 1.301582607 0.70621433 0.770674146 1.391299381 1.160315552  
 0.368098287 0.978010024 1 1.668736318 1.836076333 1.364856814 1  
 0.475061289 0.295865253 0.099175873 1 1.238787444 0.876378512  
 1.179978896 1.480065444 0.877156586 1 1.054139188 0.66933003  
 0.926271792 0.781559953 0.366096259 1 0.980422477 0.885030916  
 0.843866935 0.667528396 0.863380191 0.622568686  
 YGR242W YGR242W::YGR242W::molecular\_function unknown 1 1.027589094  
 1.067470493 1.384133223 0.784201561 1 1.368884122 1.541283977  
 1.002161201 0.872088518 1 1.220344857 1.384958364 0.590107692  
 1.126560779 1 1.042043854 1.108819946 0.360151889  
 0.532024304 1 0.971324808 0.959363589 1.097682067  
 1.079873234 1.015476086 1 1.055307495 0.624229402 0.800337026  
 0.854233318 0.659943131 1 0.700936026 0.527803413 0.986736705  
 0.61352316 0.704630483 0.619066183  
 YGR244C "YGR244C::LSC2::beta subunit of succinyl-CoA ligase (synthetase;  
 ATP-forming), a mitochondrial enzyme of the TCA cycle" 1 0.74101861  
 0.977040264 1.365889898 1.229925865 1 0.992795751 1.239871273  
 1.234512005 1.312442265 1 0.847567559 1.190623496 1.269830187  
 1.366153583 1 1.568565474 1.545622937 1.435692846 1.676668018 1  
 1.434065876 1.030621579 1.575390833 1.526605394 1 0.85672146  
 1.206733025 1.549483121 0.884346791 1.098972555 1 1.367158028  
 1.153362694 1.899921041 1.766340968 1.069519315 1 1.184981115  
 1.036333934 1.53534383 1.192766331 1.715966964 2.561200158  
 YGR246C YGR246C::BRF1::RNA polymerase III transcription factor with homology  
 to TFIIB 1 0.796412354 0.886154777 0.968691575 1.113873587 1  
 0.937364347 0.931117011 0.89856633 0.999343987 1 0.869615602  
 0.869693411 0.734084406 1.179137433 1 1.066291345 0.676752509  
 0.652569294 1.020687552 1 1.003630353 0.908238813 0.986665105  
 0.812257391 1 1.057737841 1.15548349 0.966179392 0.887365687

|             |                                                             |             |             |             |               |
|-------------|-------------------------------------------------------------|-------------|-------------|-------------|---------------|
| 1.039017626 | 1                                                           | 1.249691741 | 1.054792728 | 1.043534818 | 1.015614101   |
| 0.96574124  | 1                                                           | 1.060849533 | 1.102184066 | 1.04043546  | 1.102598544   |
| 0.928647011 | 1.510451421                                                 |             |             |             |               |
| YGR248W     | YGR248W::SOL4::similar to SOL3                              | 1           | 1.031715986 | 2.469425226 |               |
| 2.292893092 | 1.879077261                                                 | 1           | 2.022496236 | 2.84044955  | 2.337498071   |
| 2.577258504 | 1                                                           | 1.458846947 | 3.624398831 | 9.506934206 | 1.989189358 1 |
| 9.639970479 | 13.67185127                                                 | 22.11565223 | 13.84520428 | 1           | 4.968265525   |
| 8.175283931 | 19.30441033                                                 | 1.311993976 | 1           | 0.926911168 | 1.542653756   |
| 1.489864432 | 0.666307842                                                 | 0.806013638 | 1           | 1.11087194  | 1.735631291   |
| 2.477884087 | 2.173851108                                                 | 2.036202517 | 1           | 2.127968464 | 2.225329112   |
| 1.783536289 | 1.350524538                                                 | 6.290472663 | 2.083109451 |             |               |
| YML133C     | YML133C::molecular_function unknown                         | 1           | 0.924329212 |             |               |
| 0.727743151 | 1.036255189                                                 | 0.502709669 | 1           | 1.232584666 | 1.313382652   |
| 0.674989617 | 0.620092615                                                 | 1           | 0.903104579 | 0.892313724 | 0.420048659   |
| 0.878562909 | 1                                                           | 0.748093205 | 0.638528705 | 0.898951423 | 0.630452122 1 |
| 0.697261601 | 0.378503091                                                 | 0.281321785 | 0.795297414 | 1           | 0.801665241   |
| 0.892251835 | 1.323360779                                                 | 1.163569244 | 1.031777279 | 1           | 0.820834617   |
| 0.543570399 | 0.81945728                                                  | 1.196572119 | 0.55665846  | 1           | 0.740412346   |
| 0.681087335 | 1.045746394                                                 | 0.753903113 | 0.852323408 | 0.710131055 |               |
| YGR262C     | YGR262C::BUD32                                              | 1           | 0.953687018 | 1.010366143 | 0.864929506   |
| 1.282141039 | 1                                                           | 0.858601327 | 0.77119588  | 1.062242079 | 1.126690688 1 |
| 0.782222548 | 0.792650289                                                 | 0.831052638 | 1.072411713 | 1           | 0.840323917   |
| 0.537392148 | 0.4884199                                                   | 0.98089624  | 1           | 1.060160606 | 1.073588105   |
| 1.21762571  | 0.97535496                                                  | 1           | 1.22972564  | 1.11934483  | 1.071560062   |
| 1.047988282 | 1.220859352                                                 | 1           | 1.072590476 | 1.020615358 | 1.034264849   |
| 0.917554128 | 0.789706106                                                 | 1           | 1.196854296 | 1.092728673 | 1.085752002   |
| 1.097367309 | 0.911692468                                                 | 1.476302055 |             |             |               |
| YGR264C     | YGR264C::MES1::methionyl tRNA synthetase                    | 1           | 0.970562672 |             |               |
| 0.545537588 | 1.148300889                                                 | 0.676782161 | 1           | 1.287993954 | 0.876358739   |
| 0.51371691  | 0.57666781                                                  | 1           | 0.866316122 | 0.597348491 | 0.200325485   |
| 0.712870864 | 1                                                           | 0.820120245 | 0.604461538 | 0.433365474 | 0.457220162 1 |
| 0.457877323 | 0.202778498                                                 | 0.20867993  | 0.084724704 | 1           | 1.217757207   |
| 0.844291849 | 1.063370939                                                 | 1.187286023 | 0.986797192 | 1           | 0.934972305   |
| 0.777387988 | 0.664020398                                                 | 0.605157646 | 0.49167635  | 1           | 1.087477146   |
| 0.785847282 | 0.94978049                                                  | 0.983525739 | 0.559935932 | 1.01309692  |               |
| YGR266W     | YGR266W::molecular_function unknown                         | 1           | 0.852338096 |             |               |
| 0.966162573 | 1.12855454                                                  | 0.969438937 | 1           | 1.034087367 | 1.058405531   |
| 0.939904642 | 0.940279423                                                 | 1           | 0.84720656  | 1.030299087 | 0.805582447   |
| 0.849208615 | 0.786455047                                                 | 0.324788638 | 0.434666039 | 0.643639925 | 1             |
| 1.221552517 | 1.220152397                                                 | 0.582457597 | 0.701757069 | 1.055666439 |               |
| 1.052938793 | 1.075997248                                                 | 0.96470723  | 0.973138786 | 1           | 0.90416473    |
| 0.691693977 | 0.856409514                                                 | 0.826642732 | 0.612736234 | 1           | 0.924703782   |
| 0.77604226  | 0.740189117                                                 | 0.955351994 | 1.017475036 |             |               |
| YGR268C     | YGR268C::molecular_function unknown                         | 1           | 1.142303502 |             |               |
| 1.135936378 | 1.040883447                                                 | 0.749954039 | 1           | 1.164168058 | 1.289422165   |
| 0.884818326 | 1.042128271                                                 | 1           | 1.442078392 | 1.440622195 | 1.129801217   |
| 0.97340846  | 1                                                           | 1.85107982  | 1.190814294 | 1.536995177 | 1.242687478 1 |
| 0.965068121 | 0.947750933                                                 | 0.516236891 | 0.748483532 | 1           | 1.08839761    |
| 1.203310948 | 1.234279914                                                 | 1.049824555 | 1.057893081 | 1           | 1.0415406     |
| 0.98326361  | 1.015201773                                                 | 1.025836713 | 0.91574008  | 1           | 1.030401628   |
| 0.968175712 | 1.173241423                                                 | 1.052168323 | 1.006905879 | 0.941295842 |               |
| YGR270W     | YGR270W::YTA7::Member of CDC48/PAS1/SEC18 family of ATPases | 1           |             |             |               |
| 1.120356448 | 1.138361672                                                 | 1.232502838 | 1.045586664 | 1           | 1.241677758   |
| 1.262568309 | 1                                                           | 1.327513522 | 1.026050467 | 1.088356642 | 1             |
| 1.281870863 | 2.224850666                                                 | 1.812680633 | 0.949314531 | 1           | 1.031820671   |
| 0.523946239 | 0.217684953                                                 | 0.402397384 | 1           | 1.01638572  | 1.00297709    |
| 1.219449889 | 1.066194742                                                 | 1.15493163  | 1           | 0.889060073 | 0.898187136   |

1.050357972 0.850208168 0.619892451 1 1.151790666 1.093703967  
1.364376668 1.017086954 0.975445103  
YGR272C YGR272C::YGR272C::molecular\_function unknown 1 0.713464887  
0.873432542 0.827354846 1.222172726 1 0.728141507 0.622536946  
1.030761421 1.200419444 1 0.588767849 0.609014453 0.907965554 1  
0.603084157 0.582734936 0.558800148 0.331962495  
0.642496216 1 0.630693869 0.621094709 0.734452639 1.047697878 1  
1.036381961 0.882435481 1.298092337 1.407648481 1 0.755205815  
0.966735303 1.597936947 1.176664547 0.920280823  
YGR286C YGR286C::BIO2::Biotin synthase 1 1.320768117 1.168639674  
1.278672181 1.215082503 1 1.070771546 1.239476325 1.322720523  
1.342029045 1 0.830873768 0.651494753 0.844713058 1.493853874 1  
0.418199834 0.655760599 1.241910133 1 0.692836524 0.900652855  
1.115127148 1 0.481525962 0.362760462 0.328432298 1.365229779  
1.0895008 1 0.29702041 0.345490762 0.202667365 0.218873822  
0.936405943 1 0.397145964 0.279659373 0.677556273 1.038973293  
0.590764661 0.938668951  
YGR288W "YGR288W::MAL13::Part of complex locus MAL1; nonfunctional in S288C,  
shows homology to both functional & nonfunctional MAL-activator proteins in  
other Sc strains & to other nonfunctional MAL-activator sequences from S288C  
(i.e. MAL33, YPR196W, & YFL052W)" 1 1.257594638 1.191381716 1.363790922  
1.076333213 1 1.391170899 1.272972992 1.353289479 1.133420172 1  
1.337494371 1.112419621 1.390646063 1 1.365639808  
1.465162164 0.827235728 0.837685605  
0.926843779 0.967892312 1.072327778 0.937734578 1 0.767182842  
0.64637059 1 1.518290976  
0.778429735  
YGR290W YGR290W::YGR290W::molecular\_function unknown 1.037974935  
1.034046735 1.408863949 1.005401114 1.385072897 0.996384926  
0.998654949 1.018759074 0.992112507 0.992694903  
0.741780644 0.412589716 1  
0.957517964 0.908435776 0.998641622 1 0.879126792  
0.985625144 0.715944928 1.573075016 1  
1.600298137 0.985077  
YGR292W YGR292W::MAL12::Part of the complex locus MAL1; functional in S288C  
0.825191721  
1.06222647 1  
1 0.958274039 0.887286098 1.073321227 0.97486246 0.994395573 1  
0.877782913 0.817817244 1.100306835 0.866392481 1 1.28929507  
1.120536873 1.229089352 0.948300744  
YMR306CA YMR306CA::YMR306C-A::molecular\_function unknown 1 1.428404188  
1.448361076 1.621119871 1 1.409369537 1.414022798 1.26129749  
1.557300887 1 1.195639204 1.475261507 1.135640773 1.229168921 1  
1 0.785963304 0.254284204 0.863254001 1  
0.905989809 0.843912445 0.997506626 0.695045582 1 0.798996513  
1.01696583 0.923352399 0.776214071 0.96513027 1 1.008201225  
1.133315951 0.986690361 1.296996477 1.020689414 1.011345695  
YPR109W YPR109W::YPR109W::molecular\_function unknown 1 1.447195464  
1.261010599 1.28409426 1.510119197 1 1.187862119 1.266068883  
1.422062188 1.377240676 1 1.010219233 1.229693006 1.330399726  
1.300561106 1 1.81726093 2.104687354  
0.651921682 1 1.284444679 1.255769762 1.268420797  
1.04577706 0.982789381 1 1.107140936 1.318308057 1.084836276  
0.925868374 1.194069525 1 1.175445755 1.420357161 0.942762514  
1.665109159 0.915762853 1.429894006  
YPR111W YPR111W::DBF20::kinase required for late nuclear division 1  
0.851939717 0.947768436 0.953238946 1.023581472 1 0.953600282



|             |                                                                                                                                                                                                               |             |             |             |             |             |
|-------------|---------------------------------------------------------------------------------------------------------------------------------------------------------------------------------------------------------------|-------------|-------------|-------------|-------------|-------------|
| 0.980046426 | 1.059709398                                                                                                                                                                                                   | 0.889455517 | 1           | 1.005329502 | 0.871693392 |             |
| 0.600008655 | 0.989455848                                                                                                                                                                                                   | 1           | 0.945195663 | 0.58561476  | 0.848160896 |             |
| 1.168602889 | 1                                                                                                                                                                                                             | 2.093385028 |             | 0.887134899 | 1           | 1.10679838  |
| 1.080844599 | 1.379742552                                                                                                                                                                                                   | 1.227051304 | 0.982688036 | 1           | 0.981882857 |             |
| 1.143692637 | 0.957901502                                                                                                                                                                                                   | 1.303696231 | 0.957202854 | 1           | 0.851749831 |             |
| 0.945813481 | 0.980128336                                                                                                                                                                                                   | 1.084104991 | 0.851578999 | 0.945673958 |             |             |
| YPR125W     | YPR125W::YPR125W::not yet annotated                                                                                                                                                                           | 1           |             | 0.718855568 | 0.778608625 |             |
| 0.910636926 | 0.813105259                                                                                                                                                                                                   | 1           | 0.81710397  | 0.850176772 | 0.852370934 |             |
| 0.884426802 | 1                                                                                                                                                                                                             | 0.693252961 | 0.67966162  | 0.685670157 | 0.789396835 | 1           |
| 0.956813615 | 0.899508719                                                                                                                                                                                                   | 1.16261857  | 1.091781108 | 1           | 1.104791605 |             |
| 1.177956086 | 0.823037733                                                                                                                                                                                                   | 0.984282192 | 1           | 0.972572145 | 0.934408185 |             |
| 1.119287663 | 1.005864522                                                                                                                                                                                                   | 0.983843104 | 1           | 1.019162444 | 1.171199701 |             |
| 0.820379542 | 0.831295538                                                                                                                                                                                                   | 0.806977616 | 1           | 0.880613929 | 0.940734024 |             |
| 0.954291738 | 0.993111548                                                                                                                                                                                                   | 0.843742686 | 0.949176408 |             |             |             |
| YPR127W     | YPR127W::YPR127W::molecular_function unknown                                                                                                                                                                  | 1           |             | 0.877712445 |             |             |
| 0.927340775 | 0.837158396                                                                                                                                                                                                   | 0.776625389 | 1           | 0.874705738 | 1.015193381 |             |
| 1.217013906 | 1                                                                                                                                                                                                             | 0.876296606 | 0.996369791 | 1.835671369 | 1.19450334  | 1           |
| 1.558174698 | 1.225042765                                                                                                                                                                                                   | 3.001397174 | 3.04732482  | 1           | 2.58336925  |             |
| 2.741847192 | 2.465993844                                                                                                                                                                                                   | 1           | 0.940104525 | 1.031404628 | 1.280152198 |             |
| 0.927325995 | 1.001729874                                                                                                                                                                                                   | 1           | 0.993788164 | 1.228560484 | 1.363122654 |             |
| 1.508930233 | 1.069239533                                                                                                                                                                                                   | 1           | 0.945003415 | 1.334784909 | 1.429269066 |             |
| 1.296875223 | 1.263342895                                                                                                                                                                                                   | 1.230251695 |             |             |             |             |
| YGR294W     | YGR294W::YGR294W::not yet annotated                                                                                                                                                                           | 1           |             | 1.602687027 | 1.822832891 |             |
| 1.223192314 | 2.182193764                                                                                                                                                                                                   | 1           | 1.5976038   | 1.274334474 | 1.829021178 |             |
| 1.967700831 | 1                                                                                                                                                                                                             | 1.554183514 | 1.388124646 | 2.529499288 | 1.626600095 |             |
| 0.289452666 | 0.292801887                                                                                                                                                                                                   | 0.234547502 | 0.437345067 | 1           |             |             |
| 1.991071778 | 1                                                                                                                                                                                                             | 0.978816863 | 1.115744463 | 1.035321124 | 1.025939567 |             |
| 0.908602577 | 1                                                                                                                                                                                                             | 1.043898705 | 1.585730499 | 1.538769523 | 1.185281285 |             |
| 2.124753416 | 1                                                                                                                                                                                                             | 1.021717425 | 1.499187223 | 1.118501709 | 1.449676709 |             |
| 1.179465531 |                                                                                                                                                                                                               |             |             |             |             |             |
| YPR129W     | YPR129W::SCD6::multicopy suppressor of clathrin deficiency                                                                                                                                                    | 1           |             |             |             |             |
| 1.052213636 | 1.276525837                                                                                                                                                                                                   | 1.132982503 | 1.455886992 | 1           | 1.282398741 |             |
| 1.269036236 | 1.413602974                                                                                                                                                                                                   | 1           | 1.154727389 | 1.175053118 | 1.30208955  |             |
| 1.132138269 | 1                                                                                                                                                                                                             | 0.964041936 | 0.684799529 | 1.044431559 | 1.137646793 | 1           |
| 1.07340135  | 1.361745322                                                                                                                                                                                                   | 0.999402651 | 0.73129196  |             | 1.208595416 |             |
| 1.279357377 | 1.119441248                                                                                                                                                                                                   | 1.108201371 | 1.105187133 | 1           | 0.945492795 |             |
| 1.025117791 | 0.986112811                                                                                                                                                                                                   |             | 1.098331497 | 1           | 1.16755164  | 1.267797062 |
| 1.203432436 | 1.359601879                                                                                                                                                                                                   | 1.302900938 | 1.068261305 |             |             |             |
| YGR296W     | YGR296W::YRF1-3::Y'-helicase protein                                                                                                                                                                          | 1           | 1           | 2.312914809 |             |             |
| 2.093547489 | 2.093304896                                                                                                                                                                                                   | 2.148882187 | 1           | 1.898844726 |             | 1           |
| 2.050973968 |                                                                                                                                                                                                               | 1           |             |             |             |             |
|             | 1                                                                                                                                                                                                             | 1.234496961 | 0.853366031 | 1.080855641 | 1.056446568 |             |
| 1.211974811 | 1                                                                                                                                                                                                             | 1.312749672 | 1.302341291 | 1.078560893 | 1.823654684 |             |
| 2.327192661 | 1                                                                                                                                                                                                             | 0.867770767 | 0.939776728 | 0.768718857 | 1.410047244 |             |
| 0.806082344 | 1.539347006                                                                                                                                                                                                   |             |             |             |             |             |
| YPR131C     | "YPR131C::NAT3::Non-essential gene, growth of null mutants is retarded on both YPD & YPG media. The mating efficiency of MATalpha cells, but not MATa cells, is reduced by nearly three orders of magnitude." | 1           |             |             |             |             |
| 0.798467915 | 1.018452361                                                                                                                                                                                                   | 0.875831649 | 1.22742282  | 1           | 0.847007908 |             |
| 0.799380963 |                                                                                                                                                                                                               | 1.021825235 | 1           | 0.752087529 | 0.849001051 | 0.882377499 |
| 0.942797356 | 1                                                                                                                                                                                                             | 1.057548601 | 0.910445189 |             | 1           | 1.477767667 |
| 1.525447871 | 2.423109822                                                                                                                                                                                                   |             | 1           | 1.292080883 | 1.341908052 | 1.160364751 |
| 0.985476001 | 1.210916151                                                                                                                                                                                                   | 1           | 1.120763986 | 1.564667617 | 1.545109936 |             |
| 1.394418751 | 1                                                                                                                                                                                                             | 1.277679107 | 1.369173998 | 0.945744102 | 1.650377599 |             |
| 0.932697694 | 1.163704293                                                                                                                                                                                                   |             |             |             |             |             |
| YHL014C     | YHL014C::YLF2::Protein with weak similarity to B. subtilis GTP-binding protein and to human glycogen phosphorylases                                                                                           | 1           |             | 1.370346667 |             |             |

1.40793519                    1.523583757 1            1.249439928 1.287364441 1.404806566  
1.38055201 1            1.079942977 0.932495741 1.093296304 1.166301417 1  
1.029311211 0.857722819 0.798452876 1.243903542 1            0.822743335  
1.09422121 0.932487224 0.749639152 1            0.826353886 0.748252463  
0.71521844 0.820336862 0.917862555 1            1.02980627 0.948191782  
0.81861047 1.821230523 1            1.077273944 0.936490028 0.881097482  
1.240641323                    0.922907714  
YPR133C            YPR133C::IWS1::Interacts with Spt6 1            1.205791559 1.943811365  
1.164394187 2.386618237 1            1.256630717 1.287736245            1.811510527 1  
1.170274588 1.241884447 2.026823076 1.058302764 1            0.897355083  
0.611096871 0.528123699            1            1.619677825 1.936794766 1.662780361  
1.146146171 1            1.037105298 1.381633014 1.293097237 0.999347653  
0.986274927 1            1.326083206 1.993502542 1.76743771 1.241445292  
1.608594172 1            0.847939925 1.243912546 0.839904119 1.042451074  
0.924109414 1.042868171  
YHL016C            YHL016C::DUR3::Urea active transport protein 1            1.067863683  
0.908264245 1.173535104 0.943638047 1            1.414360904 1.351642064  
1.064841549 1.1624816 1            1.675341725 0.984610406            1.160411098 1  
1.879997249 1.142001801 1.261965482 0.642170904 1            1.097582135  
0.336736285 0.710190934 1            0.824351109 0.827837955 1.191632049  
1.082146195 0.907981142 1            0.655364796 0.7840865 1.071468847  
0.863463786 1.081689374 1            0.77435427 0.83372812 1.15899041  
0.872424811 1.040405988 0.962310756  
YPR135W            YPR135W::CTF4::May function in DNA synthesis 1            1.425804954  
1            1.273817975 1.568440417 1            0.891709942  
1.018142824                    1.162987788  
                                  0.885618562 0.654405134 1.288165626 1.177039757  
0.818125578 1            0.774177083 0.705311492 1.071596267 1.336592823  
0.667201408 1            0.9134867 0.760637174 0.529175135 0.81100191  
0.392497022 1.403625311  
YHL018W            YHL018W::YHL018W::molecular\_function unknown 1            0.9355491  
0.907017022 1.422081192 0.855220744 1            1.361213415 1.178771605  
1.004183213 0.927092856 1            1.059044552 1.218760834            1.119550215  
1.291833819                    1.13938447 0.617509252                    0.823009186  
0.515301524 1            1.017755685                    1.098633966 1.214298583 0.97567216 1  
                                  0.837962093                    1.113267621                    1                    1.175230494  
1.031168948  
YPR149W            YPR149W::NCE102::involved in secretion of proteins that lack  
classical secretory signal sequences 1            1.409247575 1.33310117  
1.172876605 1.78398869 1            1.303055042 1.16850698            1.55191756 1  
1.218249558 1.159383943 1.953970164 0.883505601 1            1.651766648  
1.652763147 2.33666536            1            1.513518861 0.968741619 2.21386488  
1.339118443 1            1.337330072 1.414901808 1.065743593 1.042131618  
0.786282867 1            0.926033808 0.96325257 1.087757088 0.750446354  
0.840974061 1            1.144581177 0.742840728 0.901917752 1.250613015  
1.492813943 1.063883189  
YHL020C            YHL020C::OPI1::Negative regulator of phospholipid biosynthesis 1  
1.067429247 1.08391272 1.144715856 0.77927981 1            1.149754537  
1.103243299 1.063251959 1.063490198 1            1.021875613 1.151026212  
0.807180205 1.048526088 1            1.184353415 0.85201051 0.792568284  
0.951551137 1            1.23638935                    0.703622148 1.00197536 1  
1.106688632 1.052201403 0.891325517 0.883289617 1            0.951659398  
0.898119196 1.024571245 1.020830958 0.892263925 1            1.109364562  
1.238726589 0.81986588 1.003601886 0.964937646  
YPR151C            YPR151C::YPR151C::molecular\_function unknown 1            1.264326819  
1.557217295 1.428361613 1.685881373 1            1.244772093 1.308538178  
1.723229353 1.974491969 1            1.073745301 1.393306308 2.383325939

1.078231199 1 1.490333552 1.33791835 1.729275435 1.336186812 1  
0.841618727 1.502911704 1.555754267 0.942246087 1 0.574064137  
0.950282437 0.840321263 0.78638623 1 0.309217125 0.506608153  
0.577435112 0.996411918 1.036272607 0.539731093 0.676219312  
1.113593945 0.730666271 1.259955435 0.898390244  
YHL022C "YHL022C::SPO11::Dispensable for mitosis, premeiotic DNA synthesis, spindle pole body duplication, meiosis I, meiosis II & spores. Required for chromosome pairing seen by in situ hybridization, double strand breaks, synaptonemal complexes." 1 1.661237658 1.368275553 1.398671778 1  
1.344650881 1.373665743 1.397171801 1 1.174593922 1.281348845  
1.551721336 1.23880907 1 0.858420044  
0.3806826 1 0.81025615 0.995827337  
0.884432713 0.976751256 1 1  
0.760036942 0.70837312 0.865116491  
YHL024W YHL024W::RIM4::Regulator of IMe2 expression 1 1.272548824  
1.21823038 1.382419603 0.938492595 1 1.317081896 1.340744335  
1.038234375 0.9873378 1 1.206731604 1.452015751 1.464508802  
1.048438199 1 1.272294505 2.809290969 1.598291984  
0.577426823 0.484188825 0.371799836 0.923280166 0.958137449  
0.937734578 1 0.80426434 0.530460474 0.974086995 0.910949302  
0.78223488 1 0.836083805 0.665391814 0.864678454 1.211664717  
0.912400256  
YHL038C YHL038C::CBP2::Protein required for splicing of COB aI5 intron 1  
1.424561731 1.493744336 1.527889336 1.467065248 1 1.242476179  
1.594877938 1.573273286 1 1.433734224 1.559509867 1.866054988  
1.594874527 0.685937681 0.778955919  
0.748088544 0.283741982 1 0.891244478 1.049249169 1.115845092  
1.320136904 1.235966877 1 1.057962012 1.054862208 0.823709516  
1.072250731 0.933502929 1 0.768172983 0.628947819 0.877287513  
0.793252183 0.773403579 1.34145592  
YHL040C YHL040C::ARN1::Transporter that specifically recognizes siderophore-iron chelates and is expressed under conditions of iron deprivation.  
1.05398168 1.038602017 1.057766094  
1.186341921 1.127526306 0.810602901 1  
1 6.790232289 9.35107061 8.332060432  
1.269178765 1.753606761 1 10.92840475 15.91490546 13.52383301  
4.606055862 0.328098534 1 13.74451271 17.65474736 3.899572774  
0.576503723 0.472807972 1.525336994  
YPR153W YPR153W::YPR153W::molecular\_function unknown 1 1.121102658  
0.96419535 1.098281417 0.814300685 1 1.128857544 0.994326692  
1.534542887 1 1.004946695 0.826145043 0.821759362 0.879394185 1  
1.016422179 0.976608562 0.258445077  
0.33483727 0.779481295 1  
0.513246153 0.830516405 1 0.561854888 0.522231705  
1.105099499 0.351567184 0.875624  
YPR155C YPR155C::NCA2::Regulates proper expression of subunits 6 (Atp6p) and 8 (Atp8p) of the Fo-F1 ATP synthase 1 0.897144311 0.927924884 0.977648615  
0.982961586 1 1.02524735 1.05796634 0.861806101 0.907186955 1  
0.944871023 1.046053332 1.155679977 0.874244757 1 1.238300007  
0.626350576 1.378516334 1.190962599 1 1.305390341 1.418934637  
1.925992121 0.833249118 1 0.934905 1.336423329 0.656943296  
0.809002646 1 1.030041798 1.231073456 1.443440478 1.227859793 1  
1.073426656 1.052944494 1.121297175 1.490300143 0.858109149 1.057753744  
YPR157W YPR157W::YPR157W::molecular\_function unknown 1 1.119417968  
1.019577734 1.06522722 0.89099287 1 1.077969662 1.126807147  
1.127679561 1 1.072239759 1.062069592 1.03349461 0.948151957 1  
1.273423199 0.935147187 1.143960205 1 0.827989297

1.553158371 1.183666005 1 1.217694759 1.251032446 1.12635384  
1.364255351 1.127030079 1 1.214821632 1.128588951 0.946981387  
1.603212799 1.014675037 1 1.780727643 1.558612902 1.140624049  
1.517428248 1.052336468 0.684737973  
YPR159W YPR159W::KRE6::cell wall beta-glucan assembly 1 0.696460894  
0.575395102 0.83500564 0.442211796 1 0.841384744 0.817743714  
0.535110852 0.584384875 1 0.729335754 0.590450881 0.338146719  
0.786294287 1 0.541241672 0.388632049 0.448826829 0.438086749 1  
0.450481824 0.37725392 0.322835908 0.473068683 1 0.80301471  
0.655091276 0.99655402 1.109951722 0.794557547 1 0.987563088  
0.452816831 0.907128062 0.988676797 0.253639279 1 0.58119099  
0.399810982 0.837986097 0.505617219 0.5315024 0.576160585  
YHL042W YHL042W::YHL042W::molecular\_function unknown 1 1.679454213  
1.296099661 1.523502449 1 1.395584395 1.42934774  
1.466119826 1 1.184152699 1.308609875 1.617796439 1  
0.82483617 1.422798927 0.830836684 1  
1.307009231 1.270345983 1 1.076094215 0.937390928  
0.789556559 0.804147388 1.355253733 1 1.14598437 1.247951184  
0.450033335 1.345569915  
YPR173C YPR173C::VPS4::Defective in vacuolar protein sorting; homologous to  
mouse SKD1 and to human hVPS4 1 0.731111928 0.87976261 0.946662597  
1.100270161 1 0.928980767 0.899283181 1.194848912 1  
0.688546879 0.839244215 0.884403441 0.984202774 1 1.155479328  
0.672139489 1.012582804 1.291551144 1 1.073818336 1.303333276  
1.056776753 1 0.902525155 1.043566957 0.976103263 0.854496807  
1.001042374 1 1.159499695 0.902603008 1.341449827 0.973980548  
1.132429565 1 1.117485639 1.096349625 0.827288731 1.299884766  
0.926068394 0.863365265  
YHL044W YHL044W::YHL044W::molecular\_function unknown 1 1.297121229  
1.441724133 1.203390402 1.656935526 1 1.279138623 1.437217399  
1.775954493 1.519685062 1 1.363429985 1.700306636 2.536594618  
1.645080783 1 1.662219983 2.478095238 2.840220076 2.830467952 1  
2.536127715 2.950303647 4.117360874 3.131434979 1 1.145164274  
1.385944918 1.099881103 1.249609567 1 0.930951053 1.804825863  
2.055766739 1.60597459 1 1.32976834 1.337842849 1.215430385  
1.265163001  
YPR175W "YPR175W::DPB2::DNA polymerase epsilon, subunit B"  
0.994879931 0.991910469 1.09242864 0.944705059 1.129609258  
1.026987173 1.132857925 1.102733122 0.80777346 0.80915349  
0.986269683 1.271706735 1 0.609747531 0.396822321 0.532120641  
0.879323496 1 0.817309035 1.845473848 1.271927669 0.988673397 1  
0.943058046 0.949628935 0.9358314 0.875637312 1.137781712 1  
1.835074711 0.867086684 1.166175067 1.349836578 0.875331443 1  
0.652078911 0.589032703 0.780715421 0.621861996 0.45156652 1.119047469  
YHL046C YHL046C::YHL046C::molecular\_function unknown 1 1.271811803  
1.446639055 0.947972979 1.911715007 1 1.187277497 1.050723011  
1.44160478 1.344583631 1 1.490627043 1.213589129 2.237374705  
1.296174784 1 1.179576809 0.727633591 1.679367138 1.596253409 1  
2.429519243 1.238994527 1.619404921 1 0.859508461 1.136011205  
0.862046004 0.783461666 1 1.155897619 1.80770602 1.37715748  
1.407208778 2.402884531 1 0.989861086 1.424000798 1.07325967  
1.1987853 1.101535006  
YPR177C YPR177C::YPR177C::molecular\_function unknown 0.881601517  
1.100255694 1.086655604 1.067862131 1.007216289 1.040109335  
1.05688916 0.986206998 0.964637905 0.79696199 1.056329127 1  
0.480357353 0.613020941 1 0.880143503 1  
0.872853426 1.119500106 1.059169588 1.133085714 1.13536234 1

1.094967651 0.874177496 1.288625506 1.322565722 1  
0.734182045 1.362792026 0.706950822 1.04885394 0.904519585  
YHL048W "YHL048W::COS8::Protein with similarity to subtelomerically-encoded  
proteins such as Cos5p, Ybr302p, Cos3p, Cos1p, Cos4p, Cos8p, Cos6p, Cos9p" 1  
1.842074985 1.29070921 1.562687347 1.53346093 1 1.671257476  
1.679300126 1.228287629 1.539868457 1 1.504020346 1.32115065  
1.41941809 1.293214606 1 1.464302837 1.445434309 1.579629128  
1.376501989 1.054480538 1.232138165 1.400228579 1  
1.049234052 1.078941135 1.510336944 1.230772291 1.108582073 1  
0.861582832 0.961451338 1.122791685 0.651209979 0.832373118 1  
0.992923501 0.966496435 0.877019923 1.151942297 1.282125849 1.048997512  
YPR179C YPR179C::PLO1::Ploidy-related. Nuclear protein 1 0.632873723  
0.749973606 0.792484956 0.709567834 1 0.819208224 0.771861239  
0.674996275 1 0.706023839 0.678159018 0.65381681 0.776412801 1  
0.763251565 0.780867349 1 0.848720938 1.217714912  
1.231951538 1 1.471051115 1.512739853 1.192449017 1.28736967  
1.2172809 1 0.978067223 1.039625332 1.252415944 1.323626923  
0.621764213 1 0.62587753 0.522816944 0.63378277 0.634886512  
0.580915586 1.133057482  
YHR012W YHR012W::VPS29::vacuolar protein sorting 1 1.033026917  
0.996672069 1.046438059 1.180932266 1 0.908786415 0.960113745  
1.135615575 1.089648906 1 1.039742796 1.262412396 0.964230952  
1.165321504 1 1.260284774 1.12893646 1  
1 1.156002856 1.444549389 0.969707253 1.051140488 1.163309516 1  
1.268843981 1.853402745 1.843409067 1.250687833 1.429396136 1  
1.195320454 1.494415793 0.986837728 0.929803236 1.334264716 1.061256299  
YPR181C YPR181C::SEC23::cytoplasmic GTPase-activating protein 1  
1.006906959 0.72714901 0.911276324 0.507412698 1 1.062437789  
1.02719293 0.608505292 0.525126377 1 1.206231997 0.905385967  
0.566711788 0.654344503 1 0.892396817 0.89409066 0.862492883  
0.396747164 1 0.456955411 0.32566504 0.308492093 0.474033585 1  
1.090933003 0.713869317 0.939651534 1.080495939 0.641249252 1  
0.82890254 0.456008986 0.714519342 0.680442647 0.240901163 1  
0.747595011 0.508522541 0.779973611 0.483076774 0.576009719 0.493851945  
YHR014W YHR014W::SPO13::Spo13 acts as a transcriptional activator in a one-  
hybrid assay (see Henninger et al (1996) SPO13 and control of meiotic chromosome  
segregation in *Saccharomyces cerevisiae*) 1 1.456540227 1.210424414  
1.174321111 1.40180047 1 1.13690121 0.977267395 1.281026445 1  
1.368290935 0.999904316 0.877257366 1.234797411 1.336062318  
1 0.889294974 1.048133725  
0.988964271 1.160530402 1 0.88126483 1.098606241  
1.247952147 1.488388596 1 0.823725463 1.004839326 0.279786092  
0.973577684 0.959683866  
YPR183W YPR183W::DPM1::dolichol phosphate mannose synthase 1  
1.46415139 1.352094898 0.725618194 0.712907256 1 1.151763345  
1.055013803 1 1.478098628 1.13685488 1.212910197  
0.675922074 1 0.951399864 0.721070067 0.547915859 0.839188205 1  
0.845470556 0.742730186 0.515098481 0.928906654 1 1.393291981  
1.097668841 1.115971239 1.265799201 0.778788892 1 0.942174824  
1.145508895 1.215575294 1.121104979 0.802596284 1 0.895527475  
1.148755591 0.964429053 1.02815012 0.797234716 1.058629408  
YHR016C YHR016C::YSC84::SH3 domain in C-terminus 1 1.108494913  
1.156917107 1.35525599 0.918221173 1 1.538248848 1.571020568  
1.005225108 1.043029498 1 1.210696886 1.801413183 1.2797407  
1.606283989 1 1.775873016 0.567896842 2.986045098  
1.031451936 1 1.032213043 1.372802408 1.728721287  
0.915833511 1.097107344 1 1.105524586 1.292084977 1.836956499

0.979537608 0.699403456 1 1.111559951 1.533088146 1.264963874  
 0.726123533 1.730511184 0.774051619  
 YHR018C YHR018C::ARG4::argininosuccinate lyase 1 1.40560468  
 1.171744038 0.884753131 0.499759235 1 1.043261482 0.968690465  
 0.581934074 0.582351995 1 3.229093526 1.894514021 0.385698919  
 0.448069154 1 1.243035166 1.179367315 0.433248021 0.522825899 1  
 1.912544185 0.680575543 0.546026509 0.675028636 1 1.071677653  
 1.129816596 1.586543973 1.035489172 0.94724651 1 2.288612692  
 1.33745515 2.260248742 1.270263464 0.7466136 1 3.603015876  
 1.49883828 2.506771552 0.653677706 1.16063975 0.980698884  
 YHR020W YHR020W::YHR020W::not yet annotated 1 1.071584379 0.524334419  
 0.961638573 0.4074413 1 1.113930213 0.906473612 0.701592708 1  
 0.952138777 0.663247298 0.256556796 0.736811173 1 0.59772977  
 0.348703387 0.297116095 1 0.571571785 0.253891227 0.223355708  
 0.369617185 1 0.867188673 0.585332693 0.990321924 1.130546076  
 0.681309654 1 0.691719481 0.575643147 0.448707417 0.430553418  
 0.376030596 1 0.801086706 0.73245025 0.852163773 0.704898724  
 0.4146975 0.681235469  
 YHR022C YHR022C::YHR022C::molecular\_function unknown 1 1.024630032  
 1.013218972 1.090062556 1.166215397 1 1.084165734 1.113778428  
 1.131573358 1.041052872 1 0.983853629 1.145588371 1.444531522  
 1.327371804 1 1.265054432 1.891257218 0.271250906  
 0.224762025 0.304097026 1 1.025352244 1.062010947 0.954908418  
 0.745818397 1.00709282 1 0.869634025 1.045482434 1.145727487  
 0.857100718 1.241281818 1 1.087965814 1.107815245 0.369762345  
 1.086180464 1.118171805  
 YPR197C YPR197C::YPR197C::molecular\_function unknown 1 1.028696309  
 0.765249695 1.021921039 0.797886468 1 0.982817391 1.149318448  
 0.909841214 0.754594622 1 0.985579762 0.904436709 0.571256867  
 0.838718256 1 1.079692227 0.74550528 0.931812151 0.612678599 1  
 1.043858419 0.869936287 0.885018684 1.076839696 1 1.040007655  
 0.872364882 1.223928254 1.128589828 1.03446987 1 0.85625018  
 0.628691306 0.959412926 0.852303003 0.47674964 1 0.943409688  
 0.71611161 0.958833535 0.80818871 0.737424808 0.829215951  
 YPR199C YPR199C::ARR1::Similar to transcriptional regulatory elements YAP1  
 and cad1 1 0.885708277 1.001896667 0.855018599 1.127584812 1  
 0.811802509 0.927056555 1.101940259 1 0.869356197 0.851233373  
 0.944518439 0.873234556 1 1.570655615 1.106524543 1.281946418  
 1.64717585 1 1.092231657 1.00468194 1.356792614 1.073965457 1  
 1.127784446 1.104691663 0.8598956 0.943763141 1.105999398 1  
 0.997566983 1.099864466 0.974730568 0.966501029 1.496583647 1  
 1.148901869 1.126461171 1.028859406 1.179583367 1.512436929 1.198729219  
 YPR201W YPR201W::ARR3::Putative membrane protein involved in arsenite  
 transport 1 1.027319439 0.92577032 1.105930236 0.767860893 1  
 1.183090431 1.320392309 1 4.650739328 3.665971255  
 1.22951469 1.718691972 1 2.130006104 2.231837042 1  
 2.641250094 1 2.112292511 3.669111039 3.029825647  
 1.290544289 1.029309515 1 2.202462329 4.020036554 8.162822006  
 4.827671545 0.901663282 1 3.151025947 2.471823808 2.966003266  
 0.664269916 1.670588077 1.495565744  
 YPR203W YPR203W::YPR203W::molecular\_function unknown 1 0.898383722  
 0.61744598 0.990355726 0.498610385 1 1.233300654 1.26568999  
 0.552411575 1 0.9237834 0.872850343 0.353440479 0.799108983 1  
 0.574416329 0.467478585 0.637483653 0.439080832 1 0.516863674  
 0.521067321 0.490295572 1 0.860153391 0.925666591 1.167423681  
 1.142172973 1.03400217 1 0.706513456 0.435808561 0.706754006

|         |                                                                 |             |             |             |             |             |             |             |  |
|---------|-----------------------------------------------------------------|-------------|-------------|-------------|-------------|-------------|-------------|-------------|--|
|         | 1.099671893                                                     | 0.414293898 | 1           | 0.607295785 | 0.457317831 | 0.798032162 |             |             |  |
|         | 0.532080804                                                     | 0.694940873 |             | 0.655842387 |             |             |             |             |  |
| YHR036W | YHR036W::YHR036W::molecular_function unknown                    |             |             |             |             |             | 1           | 0.694063508 |  |
|         | 0.714643302                                                     |             | 0.722995531 | 1           | 0.721121801 | 0.754609539 |             |             |  |
|         | 0.839549284                                                     | 1           | 0.731206342 | 0.675260035 | 0.572236979 | 0.919742931 | 1           |             |  |
|         | 0.692428957                                                     | 0.674661855 | 0.836867351 | 0.745923246 | 1           | 0.590777956 |             |             |  |
|         | 1.0598746                                                       | 0.794557604 | 0.692487731 |             | 1.56466889  |             |             |             |  |
|         | 0.890051473                                                     | 0.497573422 | 1           |             |             |             | 1           |             |  |
|         | 1.183643361                                                     |             |             | 8.550468661 |             |             |             |             |  |
| YHR036W | YHR036W::YHR036W::molecular_function unknown                    |             |             |             |             |             |             |             |  |
|         |                                                                 |             |             |             |             |             | 1           | 1.000469582 |  |
|         | 1.121586943                                                     | 1.086694376 | 1.319124256 | 1.191809557 | 1           | 0.850256794 |             |             |  |
|         | 0.71461371                                                      | 0.760376162 | 1.079374487 | 0.670488623 | 1           | 0.785362339 |             |             |  |
|         | 0.64902661                                                      | 1.032152176 | 0.560322468 | 0.781737858 | 0.490349442 |             |             |             |  |
| YHR038W | YHR038W::FIL1::Putative mitochondrial ribosome recycling factor |             |             |             |             |             | 1           |             |  |
|         | 0.760340445                                                     | 1.104605787 |             | 1.176986547 | 1           | 0.869047083 | 0.912719439 |             |  |
|         | 1.238706184                                                     | 1           | 0.879752567 | 0.959785306 | 1.487303779 | 0.979708283 | 1           |             |  |
|         | 1.016995868                                                     |             | 1.470587998 | 1.837625802 | 1           | 1.04322839  | 3.14652642  |             |  |
|         | 2.061528256                                                     | 1.459401499 | 1           | 1.148988991 | 1.217342035 | 1.437247547 |             |             |  |
|         | 1.4007805                                                       | 1.260856968 | 1           | 1.100740064 | 0.774731454 | 1.025111652 |             |             |  |
|         | 1.018219622                                                     | 0.647484834 | 1           | 1.059202046 | 0.909744911 | 1.049808664 |             |             |  |
|         | 0.613772224                                                     | 0.836806648 | 0.817832829 |             |             |             |             |             |  |
| YHR039C | YHR039C::MSC7::Meiotic Sister-Chromatid recombination           |             |             |             |             |             | 1           |             |  |
|         | 1.905959508                                                     | 1.37108457  | 1.334690431 | 1.505312408 | 1           | 1.315276478 |             |             |  |
|         | 1.162550792                                                     |             | 1.205769864 | 1           | 1.362909813 | 1.296765794 | 1.080512792 |             |  |
|         |                                                                 | 0.540745968 |             |             |             |             |             | 1           |  |
|         | 1.1504647                                                       | 1.171874572 | 1.628613956 | 1.397542862 | 1.027180839 | 1           |             |             |  |
|         | 1.027011324                                                     | 1.06420883  | 1.03463714  | 0.739083428 | 0.658933488 | 1           |             |             |  |
|         | 1.208052615                                                     | 1.150055866 | 0.968463756 | 0.936493322 | 1.028540586 | 1.099783781 |             |             |  |
| YHR041C | YHR041C::SRB2::RNA polymerase II holoenzyme/mediator subunit    |             |             |             |             |             | 1           |             |  |
|         | 1.287581578                                                     | 0.869307791 | 0.700811134 | 0.561901742 | 1           | 0.823765252 |             |             |  |
|         | 0.772175871                                                     | 0.931477015 | 0.922960353 | 1           | 1.048607551 | 0.882733656 |             |             |  |
|         | 1.22101376                                                      | 0.73335827  | 1           | 0.712638263 | 0.676790259 | 0.799711798 |             |             |  |
|         | 0.798932067                                                     | 1           | 1.086596974 | 1.413753362 | 1.028013899 | 0.942745499 |             |             |  |
|         | 0.757797275                                                     |             | 1.20632925  | 0.737831333 | 0.539675818 |             |             |             |  |
|         | 1.482552963                                                     | 1           |             | 0.852222857 | 1.482924317 |             |             |             |  |
| YHR041C | YHR041C::SRB2::RNA polymerase II holoenzyme/mediator subunit    |             |             |             |             |             |             |             |  |
|         |                                                                 |             |             |             |             |             |             | 1           |  |
|         | 0.849081684                                                     | 0.981661974 |             | 0.762280233 | 0.999925655 | 1           | 1.083063947 |             |  |
|         | 1.007083598                                                     | 0.972304971 | 0.997166648 | 1.034448323 | 1           | 0.883183422 |             |             |  |
|         | 1.239578088                                                     | 0.965284274 | 0.918899168 | 1.177063923 | 0.921156488 |             |             |             |  |
| YHR043C | YHR043C::DOG2::2-deoxyglucose-6-phosphate phosphatase           |             |             |             |             |             |             |             |  |
|         | 0.842200327                                                     |             | 0.878862771 | 1.195321106 |             | 0.862038351 | 0.927034388 |             |  |
|         | 1.156707574                                                     | 1.034586683 |             | 0.740258075 | 0.899059475 | 1.378907819 |             |             |  |
|         | 0.933955502                                                     | 1           | 1.584377097 | 1.277665842 | 1.477162578 | 2.059238948 | 1           |             |  |
|         | 2.171782741                                                     | 2.735063844 | 2.564160407 | 2.089748137 | 1           | 0.898366324 |             |             |  |
|         | 1.695038271                                                     | 2.696452609 | 1.516042926 | 1.115124925 | 1           | 0.511629221 |             |             |  |
|         | 1.091652518                                                     | 1.530427574 | 0.683143845 | 0.741876208 | 1           | 0.539341757 |             |             |  |
|         | 1.338627201                                                     | 1.844965903 | 0.672354199 | 1.394923705 | 0.50348379  |             |             |             |  |
| YHR045W | YHR045W::YHR045W::molecular_function unknown                    |             |             |             |             |             | 1           | 0.866641387 |  |
|         | 0.795343486                                                     | 0.906409023 | 0.751618669 | 1           | 0.823859635 | 0.753404933 |             |             |  |
|         | 0.748470161                                                     | 1           | 0.680370855 | 0.538362804 | 0.458156267 | 0.954613387 | 1           |             |  |
|         | 0.357338638                                                     |             | 0.543751875 | 0.666582191 | 1           | 0.627353092 |             |             |  |
|         | 0.972806363                                                     | 0.896450024 |             | 0.626552317 |             | 0.758192015 |             |             |  |

|         |                                                                                                                                            |             |             |             |             |                         |
|---------|--------------------------------------------------------------------------------------------------------------------------------------------|-------------|-------------|-------------|-------------|-------------------------|
|         | 0.742532694                                                                                                                                |             | 0.915203521 |             | 1           | 1.660128216             |
|         | 0.951503553                                                                                                                                | 1.296640405 | 0.809008308 |             |             |                         |
| YHR045W | YHR045W::YHR045W::molecular_function unknown                                                                                               |             |             |             |             |                         |
|         |                                                                                                                                            |             |             |             | 1           | 1.412127827             |
|         | 1.280633346                                                                                                                                | 1.425835997 | 1.594740911 | 1.571502261 | 1           | 0.879526648             |
|         | 0.685569226                                                                                                                                | 0.99985281  | 0.909702831 | 0.572326176 | 1           | 0.748716341             |
|         | 0.532295608                                                                                                                                | 0.725457761 | 0.298617605 | 0.808074722 | 0.487722552 |                         |
| YHR059W | YHR059W::FYV4::Function required for Yeast Viability on toxin exposure                                                                     |             |             |             |             |                         |
|         | 1                                                                                                                                          | 1.232505454 | 1.778076928 | 1.408279533 | 2.161977002 | 1                       |
|         | 1.197223305                                                                                                                                | 1.286207132 | 1.942315484 | 1.822762112 | 1           | 1.162902434             |
|         | 1.539519394                                                                                                                                | 1.980621709 | 1.407946221 | 1           | 2.03658345  | 1.997868203             |
|         | 1.017969961                                                                                                                                | 2.531505414 | 1           | 1.238243668 | 1.960605219 | 1.66364551              |
|         | 1.266971312                                                                                                                                | 1           | 0.84073109  | 0.872000859 | 0.786099326 | 0.675016749             |
|         | 0.910155067                                                                                                                                | 1           | 0.806938368 | 0.965545212 | 0.740580078 | 1.177016121             |
|         | 2.247232042                                                                                                                                | 1           | 1.021197737 | 1.066048468 | 1.001435279 | 1.886943693             |
|         | 1.00052612                                                                                                                                 | 1.082271213 |             |             |             |                         |
| YHR061C | YHR061C::GIC1::Gtpase-interacting component 1 1 1.119423427                                                                                |             |             |             |             |                         |
|         | 1.022546776                                                                                                                                | 0.991409307 | 1.091890964 | 1           | 0.983850307 | 0.948148559             |
|         | 0.956232251                                                                                                                                | 1.004522993 | 1           | 0.907389287 | 0.910071486 | 0.993399383             |
|         | 1.061633222                                                                                                                                | 1           | 0.73107726  | 0.52317965  | 0.899007707 | 0.820494159 1           |
|         | 0.972749217                                                                                                                                | 1.07176149  | 0.794608154 | 0.701324543 | 1           | 0.621178512             |
|         | 0.714854115                                                                                                                                | 0.670814326 | 0.62652767  | 0.873199904 | 1           | 0.938504938             |
|         | 0.87867513                                                                                                                                 | 0.676983077 | 1.214251884 | 0.642556986 | 1           | 1.093331532             |
|         | 1.039645105                                                                                                                                | 1.231922819 | 0.965277193 | 1.052395569 | 0.750409762 |                         |
| YHR063C | YHR063C::PAN5::ketopantoate reductase 1 0.791702648                                                                                        |             |             |             |             |                         |
|         | 0.908995332                                                                                                                                | 0.870802491 | 0.900786463 | 1           | 1.035740954 | 0.899043477             |
|         | 1.036779284                                                                                                                                | 0.892829606 | 1           | 0.835352172 | 0.965428232 | 0.795635777             |
|         | 1.08711594                                                                                                                                 | 1           | 1.219936077 | 0.802856548 | 0.79438542  | 1.059855405 1           |
|         | 1.157014071                                                                                                                                | 0.875903539 | 0.971473134 | 1.133824743 | 1           | 0.892552549             |
|         | 0.997693235                                                                                                                                | 0.68334975  | 0.865968633 | 1.070658157 | 1           | 1.155794717             |
|         | 1.366548712                                                                                                                                |             | 0.822636206 | 1.907262368 | 1           | 1.209981488 1.424652071 |
|         | 0.830186174                                                                                                                                | 1.853284005 | 1.134392788 |             |             |                         |
| YHR065C | YHR065C::RRP3::Required for maturation of the 35S primary transcript of pre-rRNA and is required for cleavages leading to mature 18S RNA 1 |             |             |             |             |                         |
|         | 0.895245617                                                                                                                                | 0.82296429  | 1.118347272 | 0.950500021 | 1           | 1.047768818             |
|         | 0.922300532                                                                                                                                | 1.006837081 | 1.08434287  | 1           | 0.589027302 | 0.514885794             |
|         | 0.56055674                                                                                                                                 | 1.117185781 | 1           | 0.381046112 |             | 0.5995983 1             |
|         | 0.641348215                                                                                                                                |             |             | 1           | 0.991952719 | 0.993021449 1.182811042 |
|         | 0.909479949                                                                                                                                | 0.999422072 | 1           | 1.163106947 | 0.982242206 | 0.787436481             |
|         | 1.050863801                                                                                                                                | 0.715246735 | 1           | 1.011890269 | 0.829937622 | 0.983051618             |
|         | 0.851997961                                                                                                                                | 0.87000316  | 1.088400659 |             |             |                         |
| YHR067W | YHR067W::RMD12::Required for Meiotic nuclear Division                                                                                      |             |             |             |             |                         |
|         | 0.948090967                                                                                                                                | 0.967995327 | 1.098019365 | 0.970158276 |             | 1.111448283 1.098382    |
|         | 1.35942951                                                                                                                                 | 1.142381961 |             | 0.903018384 | 1.004831137 | 0.843704655             |
|         | 1.109194553                                                                                                                                | 1           | 0.863374077 | 0.415501677 | 0.706554647 | 1.336688635 1           |
|         | 1.592094317                                                                                                                                | 1.234953908 | 1.315819863 | 1.247707163 | 1           | 1.147885939             |
|         | 1.13415738                                                                                                                                 | 1.249223171 | 1.126311131 | 1.050103205 | 1           | 1.066467286             |
|         | 1.218373853                                                                                                                                | 1.021535193 | 0.891017849 | 1.184272177 | 1           | 1.1050588               |
|         | 1.157559059                                                                                                                                | 1.096848482 | 1.527526291 | 1.075055958 |             |                         |
| YHR069C | YHR069C::RRP4::Ribosomal RNA Processing 1 0.767884167                                                                                      |             |             |             |             |                         |
|         | 0.751044409                                                                                                                                | 0.899623149 | 0.969661546 | 1           | 0.807553653 | 0.767418442             |
|         | 0.965507314                                                                                                                                | 1.08158817  | 1           | 0.608141948 | 0.578506366 | 0.606008091             |
|         | 1.001514359                                                                                                                                | 1           | 0.527548236 |             | 0.535951193 | 0.78523679              |
|         | 0.379518448                                                                                                                                |             | 0.249577652 | 0.568571084 | 1           | 1.276647372 1.364723809 |
|         | 1.077102479                                                                                                                                | 0.964259279 | 1.084251892 | 1           | 1.089276012 | 1.875472207             |



1.114527831 0.768281829 1.827977379 1 1.170854435 1.708547779  
1.127971675 1.849483417 1.275218947 1.633038768  
YHR082C YHR082C::KSP1::Serine/threonine kinase similar to casein kinase II  
and other serine/threonine protein kinases 1 0.878595415 0.949351175  
1.171860793 0.795106372 1 1.17439856 1.310348604 0.782951489  
0.723658772 1 1.170489399 1.160236027 0.928048205 0.951292409 1  
1.597819211 0.831958516 1.292177172 0.942441102 1 0.651262224  
0.781947299 0.781768397 1 1.023806382 1.307681452 1.301390572  
1.286442532 1.2909618 1 0.966046309 1.11722734 1.506549021  
0.840408749 1 1.139711173 0.976983818 1.285064865 1.199599316  
1.299340423 0.910648927  
YHR084W YHR084W::STE12::Involved in pheromone and pseudohyphal growth signal  
transduction pathways 1 0.650510707 0.61131734 0.772970379 0.50712351 1  
0.825235286 0.85247416 0.618128429 0.545749706 1 0.601164449  
0.624816934 0.345502945 0.615678292 1 0.497054518 0.216198187  
0.522967792 0.605073088 1 0.483591388 0.945307857 0.65866672  
0.598953749 1 1.021873037 1.14037001 1.199713735 1.089570875  
0.940903177 1 1.082503377 0.917299086 0.801159417 0.712428735  
0.951089663 1 1.004070129 0.777138611 0.954676381 0.780904064  
0.999889738 1.133933042  
YHR086W "YHR086W::NAM8::May be non-essent. part of mito. splicing. Assoc.  
with spliceosomal snRNPs. Disp. for mitosis & premeiotic DNA synth. Required in  
meiosis-specific splicing of MER2 & MER3, double strand breaks, synaptonemal  
complexes" 1.182035494 1.077321805 1.248969064 0.844850223  
1.24947123 1.315861586 0.997709968 0.950332966 1.358747233  
1.0841599 0.746713672 1.21884131 1 0.978222306 0.458094492  
0.953552135 0.750971823 1 0.799115957 0.680627684 0.706029164  
0.491735681 1 0.951536656 0.939968354 1.043344497 0.922802787  
0.961732316 1 0.625695053 1.546877534 2.301830387 1.908563403  
2.192866681 1 1.273256486 1.416585994 1.745702397  
1.45266025  
YHR088W YHR088W::RPF1::protein that localizes to the nucleolus 1  
1.220719354 1.215646816 1.187281619 1.557870166 1 0.942878159  
0.914165405 1.589764504 1.795476364 1 0.747052838 0.810312031  
1.010428325 1.527571219 0.66080834 0.593900097 0.790796909 1  
0.821411784 0.659434158 1 0.82939304 0.808473285  
0.876834461 0.872898515 1.027568601 1 0.984443144 1.018155907  
1.000255208 1.311431039 0.82046012 1 0.997122883 0.795594245  
1.012454145 0.880463864 1.189961181 0.851106531  
YHR090C YHR090C::YNG2::Yeast homolog of mammalian Ing1 1 0.882924287  
1.226873106 1.138317716 1.636124759 1 0.967560448 0.902822138  
1.549780569 1.351779586 1 0.861778803 1.110561554 1.184318531  
1.234373064 1 1.057193419 0.952273708 1.571093223 1  
1.338418954 1.594041688 1.586766388 0.991185913 1 0.674719717  
1.159941298 0.991620083 0.810852231 1.070013418 1 1.053239633  
1 1.266728192 1.604766772 1.143002128  
YHR092C YHR092C::HXT4::hexose transporter 1.129090174 0.800589064  
1.085719784 0.846808194 1.178038332 1.095086831 0.768488378  
0.812801078 1.132088461 0.640976509 0.813321913 0.682355359  
4.48325889 1.448016076 1.300770345 1.065856692 1 2.630482656  
0.744430022 0.705903568 1.056487928 1 0.899357651 0.882066857  
0.945923804 0.926495871 0.867688362 1 1.095341499 1.017784361  
0.679873933 0.951903157 0.764186309 1 1.008261887 0.89656339  
0.921206298 0.962817558 0.962372623 0.799444701  
YHR092C YHR092C::HXT4::hexose transporter  
1 0.936814336 1.35153641

0.732439385 1 1.067754591 1 1.13587005  
 1.371675666 1.601087549 0.736644902 2.880802927  
 YHR106W YHR106W::TRR2::mitochondrial thioredoxin reductase 1  
 1.10759709 1.17709463 1.02032876 0.957892299 1 1.00794417  
 1.103235701 1.137441365 1.152067844 1 1.267010487 1.483230523  
 1.396094153 1.115623382 1 2.301855768 2.501813139 2.16135036  
 2.173999065 1 1.634332568 1.705835861 1.546380145 1.100831266 1  
 1.05927071 1.171554794 1.255994278 0.803859821 0.975330144 1  
 0.971644671 1.338774214 0.811276663 0.66597221 0.729295899 1  
 1.321620864 1.418137848 1.236200469 1.057285378 1.041033598 1.099783781  
 YHR108W "YHR108W::GGA2::Golgi-localized, gamma-adaptin homology, Arf-binding.  
 Interacts with Arf1p and Arf2p in a GTP-dependent manner. Effector of Arf that  
 facilitates traffic through the late Golgi." 1 0.852154804 0.846332065  
 0.919409521 0.75899425 1 0.983565828 1.008134584 0.820931799  
 0.757467922 1 0.898965991 0.900222229 0.647960044 0.875160072 1  
 0.981428655 0.842523118 0.851525226 0.893687831 1 0.68590941  
 0.73409275 0.5130596 0.744745752 1 0.677411948 0.682896663  
 0.616521736 0.918293692 0.680254257 1 0.934421192 0.804232774  
 0.563064437 0.893684808 0.937543179 1 0.970874205 0.764481634  
 1.060295117 0.775627498 1.356375742 1.084898103  
 YOL094C YOL094C::RFC4::RFC is a DNA binding protein and ATPase that acts as  
 a processivity factor for DNA polymerases delta and epsilon and loads  
 proliferating cell nuclear antigen (PCNA) on DNA 1 0.963470186  
 0.891578178 1 0.907908637 0.890509798 1.115982756 1.085330307 1  
 0.800575785 0.834550428 1.002020733 1.204399868 1 0.647702021  
 0.372437022 0.68775288 1.131263389 1 1.157420171 1.533123257  
 1.323515656 1.547160992 1 1.002142926 0.89573381 0.988636372  
 0.850505943 1.000963131 1 1.039946858 1.169733116 1.013116885  
 1.00006661 1.16244159 1 1.162371206 1.157693034 1.00016996  
 0.686282972 0.935617018 1.47980461  
 YOL096C "YOL096C::COQ3::3,4-dihydroxy-5-hexaprenylbenzoate  
 methyltransferase" 1 1.276246122 1.327563482 1.444836981 1  
 1.082012095 1.211698058 1.476091854 1.296065386 1 1.18733556  
 1.39416254 1.478278818 1.105289519 1 1.326605544 2.334005461  
 1.278216166 1.510776804 1 1.82051359 2.669202825 2.078850873  
 1.718021012 0.917573867 0.980227118 0.933541249 0.787278637  
 0.936777662 1 1.45557484 1.631837709 1.88755937 1.168572016  
 1.548525615 1 1.568068542 1.135213407 1.013234687 1.066459623  
 1.383337295 0.956181415  
 YOL098C YOL098C::YOL098C::molecular\_function unknown 1 0.918693806  
 0.79407669 1.641246044 0.531748685 1 1.078723212 1.047074554  
 1.062243456 1.022549373 1 0.872139039 1.05017356 0.432011751  
 0.991793378 1 0.397904364 0.976943183 0.21054682 1  
 0.649401728 0.319777851 0.24212231 0.383653237 1 1.164335958  
 1.255653491 1.543951318 1.988772736 1.662461426 1 0.862902306  
 0.384091181 0.643665746 0.767458829 0.267489864 1 0.395917572  
 0.294455202 0.58254778 0.230189161 0.613852756 0.288080293  
 YOL100W YOL100W::PKH2::Pkb-activating Kinase Homologue 1 0.864321989  
 0.874293483 1.014409792 1.164765978 1 1.055038368 0.919495337  
 0.851038249 1 0.93201561 1.045113438 0.990582802 0.757678786 1  
 0.695845618 0.921338649 0.684422957 0.69384355 1.14170163  
 0.496732216 0.741425368 1 1.009413894 0.959500328 1.617180394  
 1.159407711 1.003783078 1 0.996546224 0.700616357 1.317478673  
 1.523480943 0.788809058 1 0.916338245 0.936785646 1.260319019  
 0.656413267 0.987510276 0.687364863  
 YOL102C YOL102C::TPT1::Gene encodes a protein implicated in the last step of  
 tRNA splicing in yeast: transfer of the splice junction 2'-phosphate from

ligated tRNA to NAD 0.912383663 0.818810121 0.846436555 0.967221348  
 0.747019156 0.678800044 0.873161793 0.911923138 0.947626768  
 0.871558809 1.001461054 1.096467685 1.068607337 1  
 1.416323495 1 0.952760921 0.877233831 0.965953663  
 0.937572743 1.140230665 1 1.032208135 1.126899657 1.161738206  
 1.031366721 0.963172549 1 1.103879103 1.092783015 0.750174732  
 0.948832316 1.429018341  
 YOR046C YOR046C::DBP5::Dead-Box protein 5 1 0.715747735 0.806952345  
 0.670528506 0.845616428 1 0.72687213 0.666900592 0.854988943  
 0.687354625 1 0.645850992 0.612691538 0.458956904 0.780328628 1  
 0.747438792 0.439178722 0.343762862 0.646946147 1 0.900310563  
 0.696660674 0.805835551 1 0.948267757 0.969555494 1.06143729  
 0.872048627 0.966649096 1 1.188054077 1.053770407 1.100461153  
 0.97159457 0.942671083 1 1.029453634 0.792786462 0.870521323  
 0.855265774 0.771488744 0.908022036  
 YIL155C "YIL155C::GUT2::glycerol-3-phosphate dehydrogenase, mitochondrial"  
 1 1.066347084 1.19446159 1.134778881 0.962555397 1 1.177658876  
 2.019627113 0.925444618 0.836368609 1 1.078038202 1.488700461  
 0.946294082 0.972900662 1 3.692454604  
 1 0.729223431 0.756666346 1.097864581 0.74498995  
 0.670599099 1 0.691712927 0.679856965 1.227954059 1.058084283  
 0.648399965 1 0.748900385 0.490838876 1.344171154 0.540303874  
 2.026319836 0.744280421  
 YOR048C YOR048C::RAT1::RNA trafficking protein; transcription activator 1  
 0.72555638 0.607063949 0.794091163 0.570204753 1 0.738185297  
 0.811232285 0.645373492 0.578184938 1 0.722074033 0.55902816  
 0.262701742 0.836984313 1 0.399281997 0.25956037 0.329122431  
 0.382971334 1 0.623666515 0.549448323 0.53494636 0.618010073 1  
 1.151858934 1.008572059 1.458113115 1.236844622 1.04590897 1  
 1.210008895 1.243910792 1.067819342 1.050995079 1.236931438 1  
 1.134377774 1.204320316 0.715652502 1.087707202 0.936980145  
 YOR048C YOR048C::RAT1::RNA trafficking protein; transcription activator 1  
 1.687285614 1.743466238 1.368283706 1.667932228 1 1.606274671  
 1.365189837 1.635265918 1.468621376 1 1.253715253 1.54217859  
 1.30737109 1 0.728466134 0.69822811 0.807832377 1  
 1.293161387 1.587311207 1 0.92789121 0.832255442  
 0.920357201 1.190341793 0.91115903 1 0.85959222 0.593632906  
 0.639098713 0.832030494 0.480253812 1 0.74038984 0.714099099  
 0.796576485 0.732228907 0.418041914 0.661096116  
 YAL066W YAL066W::YAL066W::molecular\_function unknown 1 1.626371013  
 1.543100522 1.589508647 1 1.698391449 1.477062915  
 1.680996984 1 1.357932229 1.406132707 1.940374053 1.473553092  
 0.85319344 0.468976946  
 0.811793709 0.845642875 1 0.800200815 0.55318521  
 1.927487896 0.824588107 0.870646963 0.463988489  
 0.808200933  
 YOR050C YOR050C::YOR050C::molecular\_function unknown 1 1.267316791  
 1.122293857 1.204003416 1.136169053 1 1.118966514 1.086565591  
 1.062168423 1 0.891103839 1.089990591  
 0.306691684 0.604202666 1 1.040661153  
 1.083143505 1.035249895 1.003508181 1.193409184 1 0.786407312  
 0.922988877 0.993911545 1.054824911 1.009090328 1 1.091978788  
 1.184672959 1.29483587 1.312415672 1.773138684  
 YOR050C YOR050C::YOR050C::molecular\_function unknown 1 1.21542374  
 1.477622462 1.05607548 1.721444807 1 1.088680845 0.983270227  
 1.106692739 1.57133069 1 1.068037842 1.007455159 1.539571143  
 1.216773335 1 1.139340073 1.232894509 1.360203387 1

0.968438031 2.948449698 2.132678262 1.057773983 1 0.952686777  
0.852727203 0.941979676 1.095475514 1.103645716 1 0.898481418  
0.905295905 0.760172634 0.796584024 0.654089328 1 1.021711168  
0.827323616 0.988127034 0.939101037 1.116055073  
YOR052C YOR052C::YOR052C::molecular\_function unknown 1 1.09100995  
1.550174257 1.338960261 1.337300035 1 1.09222782 1.343503317  
1.576006046 1.278856301 1 2.018503089 2.68769965 3.387671896  
1.177036655 1 2.696696694 2.662175844 3.038455453 1.967204639 1  
2.75585373 1.573802463 3.773685983 1.487411984 1.185770218  
1.832518443 1.245731998 0.624393414 0.816211802 1 1.997648296  
2.010159541 1.707699612 1.074050764 1.251676407 1 2.362320272  
1.620093434 1.1440082 0.952766817 1.459477125 1.282789189  
YOR054C YOR054C::YOR054C::molecular\_function unknown 1 1.608323802  
1.468492956 1.316540799 1.488318788 1 1.494397337 1.383284615  
1.591097946 1.564553865 1 1.40946759 1.668185481 1.989592697  
1.429404746 1 1.259991009 1.097660643 1.038354338 1.129873665 1  
1.414409818 1.805952779 1.096485119 1 1.063146739 0.98847799  
0.967137059 0.763042587 1.122931754 1 1.304575471 1.281348542  
1.103682122 1.153407059 1.168881564 1 0.897168771 1.092576955  
1.003479158 1.103934001 0.920899222 1.173336189  
YAR003W YAR003W::SWD1::likely involved in chromatin remodeling<br>member of  
Set1p complex 1 1.215132098 0.955350713 1.12648748 0.903763028 1  
1.213827471 1.040913464 0.894670861 0.936201979 1 1.169727518  
1.089449093 1.026114939 1.000683767 1 1.320860753 1.168891247  
1.094180021 1.203751807 1 1.48397566 0.925506116 1.060045671  
1.060146898 1 1.069003655 1.108274152 1.193702374 1.173911649  
1.292234821 1 0.956043176 0.901325436 0.944730381 0.713876097  
0.514815781 1 1.024457605 0.676044737 0.82416808 0.932339243  
0.791338211 0.963186421  
YAL015C YAL015C::NTG1::endonuclease III like glycosylase involved in DNA  
repair 1 0.973232037 1.13592757 1.054027354 1.026560394 1  
1.045454723 1.135725818 1.247387049 1.47732318 1 1.170268447  
1.348741125 1.616754225 1.340159589 1 1.399538858 1.032123489  
0.9936749 0.551815166 0.869974379  
1.152321171  
YOR056C YOR056C::NOB1::Nin1 (One) Binding protein 1 1.338714344  
1.354547761 1.278162912 1.207099996 1 1.26687438 1.153807995  
1.261863105 1.352192985 1 1.126846134 1.147118536 1.068320377  
1.427208272 1 0.617906315 0.285186742 0.418004321 0.66567165 1  
0.976622415 0.870479806 0.567968894 0.592799509 1 0.816729779  
0.709289982 0.706213114 0.778740116 0.834330311 1 0.758081269  
0.625613862 0.541723827 1.055261137 1.176217337 1 0.656368731  
0.880596583 0.612218966 0.858987149  
YAL017W YAL017W::PSK1::contains serine/threonine protein kinase domain and  
shows homology with the SNF1 serine/threonine protein kinase 1  
0.882094837 0.83134079 1.04338068 0.749273305 1 1.008999601  
1.024938208 0.903557992 0.829212137 1 1.380851589 1.268030884  
0.870012066 0.973009839 1 1.946922673 1.979816649 2.074807816  
1.229568383 1 1.657733859 1.375331973 1.364988859 1.252042331 1  
1.298695408 1.367465646 1.48356847 1.143352612 1.035319359 1  
1.147323212 1.13722602 1.099444072 0.975152468 0.807026973 1  
1.493811354 1.211354419 1.427291426 1.0689615 1.46158485 1.127803701  
YOR070C YOR070C::GYP1::Gtpase activating protein for Ypt1p 1  
1.261545339 1.154391212 1.291873843 1.06971736 1 1.342754882  
1.418689956 1.124664873 0.918343352 1 1.333817854 1.387782845  
0.966423931 1.244472237 1 1.077087835 0.834006991 0.564944669 1

1.058090872 0.75914511 0.618507645 1 1.099465171 1.121151138  
1.072881987 1.113945546 1.088339957 1 1.054197825 0.795696888  
0.795286637 0.883419986 0.715077374 1 0.784416963 0.830231508  
1.091425608 0.869986023 0.886802173 0.68386236  
YAL019W YAL019W::FUN30::Shows homology to SNF2 transcriptional regulator 1  
1.261480375 1.301104487 1.095757782 1.853912738 1 1.122351624  
1.110770452 1.45637003 1.321617466 1 0.895553546 0.890098972  
0.976347366 1.254039115 1 1.133645052 0.573325586 0.445072627  
0.749784627 1 1.61207128 1.206657727 0.750283847 0.897172364 1  
0.734234109 0.531622114 0.818991098 0.890179539 1 0.870958977  
0.632330132 0.672564908 0.967049817 1.168200918 1 0.742238533  
0.716077764 0.874406347 0.901791052 0.980387352 0.95530575  
YOR072W YOR072W::YOR072W::molecular\_function unknown 1 1.412096207  
1.256248375 1.653005209 1 1.755487564 1.355070147 1  
1.307842773 1.624844456 1.313790135 1.534285859 1  
0.779742231 0.520972411 1 0.611025942 1.002859343 0.610812428 1  
0.567329393 1.11450157 0.871254399 1 0.760039747  
1.325381373 1 0.840257321 0.868618994  
YAL023C YAL023C::PMT2::Transfers mannosyl residues from dolichyl phosphate-  
D-mannose to seryl and threonyl residues in proteins; acts in complex with Pmt1p  
1 1.28075096 0.866135128 1.08907043 0.500936276 1 1.303376058  
1.45782228 0.639781061 1 1.296766466 0.967118462 0.603398472  
0.78472493 1 0.739266232 0.664590842 0.302806824 1  
1 0.993128074 0.821688728 1.162688277 1.540052378  
0.85744464 1 0.679009118 0.435773658 0.671001572 0.709413875  
0.424513423 1 0.657230344 0.517202605 0.781845444 0.542207951  
0.750666735 0.521871918  
YOR074C YOR074C::CDC21::cell division cycle blocked at 36 degree C 1  
1.52795951 1.612765357 1.385776565 1.910381657 1 1.415656101  
1.492510976 1.627341947 1.464533864 1 1.184990918 1.152499375  
1.433372484 1.607872427 0.901863787 0.476626346 0.836181765 1  
0.824696136 1 0.8733642 0.974196075 1.078162958  
0.866026197 1.295716704 1 1.296602661 2.073919546 2.066925276  
1.655649136 1.2993797 1 0.768963956 1.021748218 0.922669395  
0.97931998 1.109485526 1.221495463  
YAL025C YAL025C::MAK16::putative nuclear protein 1 0.709887776  
0.715244639 0.772572265 0.927096011 1 0.629240192 0.67986269  
0.835176793 1.139580113 1 0.402808967 0.433523372 0.482498004  
0.970874788 1 0.43682446 0.423641348 0.470003774 0.58016396 1  
0.654087612 0.49083726 0.49634761 0.776233367 1 0.668771463  
0.538778822 0.520698701 0.568152873 0.793070158 1 0.682037684  
0.824221417 1.044663973 1.783262159 1 0.522587774 0.636239597  
1.302428677 0.761370437 1.199604884  
YOR076C YOR076C::SKI7::Antiviral protein. Ski7p G protein appears to  
function as a signal-coupling factor between the two multi-complexes operating  
in the 3'-to-5' mRNA-decay pathway. 1 1.016684393 1.027540144 1.321606185  
1.213601273 1 1.076299203 1.178782831 0.945527615 0.895190244 1  
1.081135329 1.031839812 0.613434637 1.013709195 1 0.910738259  
0.931078822 0.617765572 0.594107338 1 1.255255153  
1.859882581 1 1.002564098 1.019889328 0.948187054 0.871124858  
1.04206866 1 1.006575868 0.882844358 0.898777714 0.791221835  
0.67587554 1 1.126833794 0.966037632 1.006786594 0.945559013  
1.003149564 0.756539156  
YAL037W YAL037W::YAL037W::molecular\_function unknown 1 1.21406583  
1.179493889 1.724526118 1 1.047519183 1.190037419 1.408411741 1  
0.903715561 1.147353151 1.42699438 1.728376777 1 0.866117  
1.057226873 1.133820157 1 1.048709893 1.460850993 1.241387422

2.199981664 1 0.69044119 0.92076644 1.031807727 1  
 0.82722723 1.504750094

YOR078W YOR078W::BUD21::part of small (ribosomal) subunit (SSU) processosome  
 (contains U3 snoRNA); 1 0.909539127 1.268127649 0.90362816 1.438753357 1  
 0.824939919 0.841638292 1.370248865 1.329170013 1 0.732408952  
 0.676370636 1.007505165 1.051293642 1 0.364070615 0.249129471  
 1 0.49782124 0.494016255 0.35005353  
 0.376804648 0.735992962 1 0.901837396 1.375956613 1.006955318  
 1.909673519 2.889823958 1 0.7050094 0.924973667 1.271502444  
 1.555434735 1.164340133 1.238132366

YAL039C YAL039C::CYC3::cytochrome c heme lyase (CCHL) 1 1.377781471  
 1.351033211 0.96045376 0.884186773 1 1.147035555 1.209408145  
 1.238540151 1.159497926 1 1.05717666 1.008754504 1.467511357  
 0.953251169 1 0.858018815 0.669251503 0.850875317 1.106509866 1  
 0.960799019 0.81970755 0.81155584 0.917832891 1 0.736135207  
 0.385559628 0.899530565 0.748843764 1 0.67837266 0.614176271  
 0.719676273 0.808709387 1.324279845 1 0.744043952 0.603597511  
 0.789960819 0.900885463 0.826157993 1.594511286

YOR080W YOR080W::DIA2::Digs Into Agar 1 1.342160244 1.356560569  
 1.316742879 1.441057941 1 1.215559222 1.160805125 1.498300847  
 0.997046698 1 1.243206766 1.148170121 1.021503089 1.330234438  
 0.703708753 0.665985833 0.968210491 0.771842707 0.874447264  
 1 0.870900689 0.726471575 0.64557388 0.968817865 1  
 1.099839808 1.218575534 1.268232531 1.266211728 1.364324918 1  
 1.10058989 1.158432008 1.212349022 1.4089134 1.189972988

YAL041W YAL041W::CDC24::calcium-binding protein involved in bud emergence  
 and schmooing 1 0.712558174 0.747444382 0.804396979 0.552290939 1  
 0.84330993 0.791701192 0.595975738 0.514377299 1 0.749517513  
 0.836430208 0.406566423 0.717178703 1.201554364 0.800899288  
 1.232988306 0.856811312 1 0.925847127 0.761713507 1  
 0.971074376 0.983149156 0.858056276 0.931471427 0.878920274  
 0.932241883 1.002599379 1.01515617 0.867682729 1 1.020906425  
 1.035123201 0.971301676 0.661177641 1.021416442 0.889634012

YOR094W YOR094W::ARF3::GTP-binding ADP-ribosylation factor 1  
 1.264779896 1.200001607 1.067676686 1.457645674 1 0.942964164  
 0.757470148 1.218849078 1.19206343 1 0.867771066 0.795738093  
 0.958028059 1.107125177 1 1.077372887 0.372348368 0.900862836 1  
 1.376046565 1 0.930004749 0.94254807 0.796010012  
 0.79008286 1.044111175 1 1.166465463 1.360106534 1.186837947  
 1.22536597 2.136674351 1 0.966795151 1.068838101 0.937633464  
 1.417509774 0.794845836 0.963186421

YOR096W YOR096W::RPS7A::Homology to human S7 and Xenopus S8 1  
 2.118213329 1.916913899 1.341112603 2.270328516 1 1.654156158  
 1.254285944 1.793059218 1.607832826 1 1.338763955 1.217652929  
 0.881678193 1.277652966 1 0.613761968 0.28634001 0.135254739  
 0.450507568 1 1.308822916 0.491373465 0.440898643 0.967969263 1  
 1.118351024 1.044460965 1.063413764 1.128234158 1.094219844  
 1.492172309 1.841360352 1.053003285 0.702942528 1.578416933 1  
 1.319899136 1.145142878 0.996658985 1.644105767 1.244974118

YOR098C YOR098C::NUP1::nuclear pore complex protein 1 1.016210415  
 0.848331147 1.115630762 0.70744473 1 0.987514395 1.252318051  
 0.957487029 0.961385768 1 1.06978129 0.864762156 0.681450775  
 0.995753508 1 0.668848009 0.463842567 0.540173472  
 0.664222066 0.685732754 0.538131335 1 0.946351881 0.797063338  
 0.912097525 0.922837076 1.050472798 1 1.031065977 0.946893727  
 0.819736673 0.98712403 1 0.676202557 0.469487154 0.690567325  
 0.757762548 0.758290381

YAL043C YAL043C::PTA1::pre-tRNA processing 1 0.944739972 0.767456198  
0.840679955 0.538119575 1 0.881779967 0.968510671 0.773498354  
0.687103772 1 1.02098711 1.060614691 0.787503552 0.796465033 1  
0.913617349 0.686888634 0.704477653 1 1.083601614  
0.771180252 1.226107811 1 1.118118649 0.99224315 1.117442244  
1.259528685 0.825248661 0.837313916 0.921514839 1.201745408  
0.875338731 1 0.868204861 0.684477695 1.087440658 0.506666887  
0.978602513 0.746907259  
YAL045C YAL045C::YAL045C::molecular\_function unknown 1 1.072918761  
1.278918349 1.049163223 1.52134498 1 1.140895283 1.029148348  
1.433003464 1.424623614 1 1.105431615 1.359149562 1.643926905  
1.225225327 1 1.485383984 1.225188846 1.219828693 1  
1.533573226 2.192765025 2.005595807 1.208841955 1 0.997007886  
0.900008373 0.869574533 0.925961587 1 0.872024159 1.282039226  
1.254958311 1.118311272 1.759989498 1 1.173110633 1.323399569  
1.205376351 1.674935005 1.225644567 1.36772472  
YAL047C YAL047C::SPC72::Spc72p interacts with Stu2p in the two-hybrid assay;  
Spc72p localizes to the spindle pole bodies. Molecular weight is 72 kD 1  
0.85403086 0.972115223 0.900111278 1 0.889388498 1.061331575  
1.033213271 0.870168168 1 0.884671746 0.899940136 0.862189932  
1.009978625 1 0.805490703 0.853655802 1.239580525 0.866183973 1  
0.681103775 0.904242634 0.623039998 0.487491885 1 1.033671842  
1.056321249 0.744241163 0.658396709 1.049982207 1 1.143291235  
1.268725983 1.212462755 1.808253443 1 1.083419612 1.217775008  
1.306607256 1.397937143 1.610492325 1.036738829  
YOR100C YOR100C::CRC1::carnitine carrier 1 1.312228596 1.2092835  
1.444947497 0.965200539 1 1.545888311 1.384063286 1.163090605  
1.232763527 1 1.54869245 1.532949171 1.389776907 1.23487716 1  
1.743304575 2.180508013 1.097394591 1 1.058880484 1.083645971  
0.648236269 0.763932815 0.93659015 0.874580984 1  
1.069530045 1.335933158 1 0.663538245 0.6067314  
0.908216063 0.44630104 0.670629169 0.810827823  
YAL064W YAL064W::YAL064W::molecular\_function unknown 1 1.398290355  
1.164411796 1.385788157 1.184283758 1 1.167804426 1.128985716  
1.369037025 1.281894073 1 1.19374787 1.3279933 1.127137182  
1.193539711 1 1.071150194 0.536046895  
0.970071877 1.135348909 1.11762648  
0.850962043 0.63407058 0.746196891 1.178652705 1.106295447 1  
0.797867676 0.839035534 0.841311961 0.533983972 0.852857756  
YOR102W YOR102W::YOR102W::molecular\_function unknown 1 1.633405687  
1.746489892 1.045563603 2.005930237 1 1.063934922 1.20496584  
1.785686222 1.764068604 1 1.134162013 1.240790236 2.165673636  
1.206340044 1 1.091810177 0.633466172 0.737045719 1.256191824 1  
1.566236762 2.300543645 1.33835876 1.187156394 1 0.987506005  
1.061169585 0.784489413 0.785211778 0.941984512 1 0.974414358  
1.352977259 0.931789121 0.808786193 1.519332103 1 0.977947352  
1.415346589 0.888266027 1.703397259 1.013650788 1.583128164  
YAR008W "YAR008W::SEN34::tRNA splicing endonuclease 34kDa subunit;  
homologous to the 42-kDa subunit, SEN2; contains active site for 3' splice site  
cleavage" 1 0.870806132 1.001758785 1.090404932 1.276133158 1  
0.973271452 0.920352662 1.155330298 1.310337071 1 0.581240166  
0.671388118 0.707100535 1.210577344 1 0.652834614 0.335615153  
1 0.723696316 0.770351189  
0.838665084 1  
0.893586568 1.030134128 0.868209357 0.929037055  
YOR104W YOR104W::PIN2::[PSI+] induction 1 1.395021169 1.347346731  
1.390155047 1.416235006 1 1.350918194 1.428513233 1.413873693

1.417986931 1 1.036122369 1.230185254 1.245292027 1.417666246 1  
0.957668831 0.863105037 0.86833093 0.77637497 1 1.161122137  
0.991040042 1.005626043 0.691326218 1 0.869732404 0.964859397  
0.879174798 0.899541842 0.820788792 1 0.914210821 0.937949244  
0.746827502 1.034822752 1.095863255 1 0.937844094 0.899790475  
0.974022538 1.016364415 0.908123581 0.950927634  
YAR010C YAR010C 1 0.979042359 0.83561721 1.481799446 0.814831912 1  
1.271207868 1.238032641 0.924158899 0.811202238 1 1.596617287  
1.496148737 0.591191571 1.305578627 1 0.944018582 1.290028417  
0.891948917 0.81613286 1 0.413677003 0.327595583 0.37146781  
0.664224843 1 0.924821711 1.081082329 1.744857373 1.405586316  
0.960316014 0.878132007 0.917637614 2.375557797 3.657887675  
1.048875322 1 1.105960317 1.65761394 1.116585366 1.288173848  
1.045584034 0.940420177  
YOR118W YOR118W::YOR118W::molecular\_function unknown 1 1.17253129  
0.915549435 1.280026104 1.12069969 1 1.059729982 1.008656743  
0.988698475 1.130796873 1 0.831383152 0.843162498 0.81243902  
1.10298609 1 0.635790075 0.810245288 1 0.510187857  
0.46599988 0.604783085 0.610880951 1 0.85370313 0.740661005  
0.736921679 0.967496802 0.988381418 1 0.729900894 0.571337194  
0.490112779 0.658212339 0.733569504 1 0.715610985 0.663207971  
0.885115836 1.037385884 0.665146085 0.890509573  
YAR037W YAR037W 1 1.273320258 1.312072629 1.271948595 1.308317788 1  
1.33713531 1.40819777 1.35615834 1.401242209 1 1.249986406  
1.600069728 1.665503299 1.357667012 1 1.640296118 1.215478846  
2.119964426 1 1.137611767 1.401000485 0.955660852 0.71266422 1  
1.025117837 1.280389333 1.294016322  
1.296256837 1 1.230798443 1.368879492 1.17002108  
1.530283087 1.217716307 1.086649433  
YOR120W "YOR120W::GCY1::Galactose-induced transcript, product is homologous  
to mammalian aldo/keto reductases, as well as to gamma-crystallin, a vertebrate  
eye lens protein" 1 1.425987227 1.663905781 1.485768625 1.672499717 1  
1.448607093 1.592188985 1.68946969 1.6083794 1 1.336170977  
2.717651201 4.342366076 1.779531083 1 3.081319168 5.655528896  
8.076890101 5.575493462 1 2.00172676 2.292315833 6.465524673  
3.375187384 1 0.833141456 1.136859626 1.204364391 0.848156894  
0.92941382 1 0.774501982 1.120200234 3.086613146 3.05078695  
2.707479668 1 1.425062331 1.673795848 1.418782334 2.645052093  
2.059467646  
YAR042W YAR042W::SWH1::Similar to mammalian oxysterol-binding protein 1  
0.941057727 0.968406423 1.154907866 0.799990151 1 1.189011534  
1.254094308 0.90585569 1 1.367796762 1.470915551 0.87009601  
1.07412038 1 1.439528866 1.782955205 1.357549403 1.307847782 1  
0.83974011 0.9825323 1 1.020815345 1.030604925  
1.157236586 1.099295185 0.828149149 1 1.052721628 0.575676787  
1.248123447 1.69471841 0.422724057 1 0.874837289 0.810575336  
0.602519727 0.927074448 0.732897299  
YOR122C YOR122C::PFY1::profilin (actin-binding protein) 1 1.405547482  
1.287740377 0.932903686 1.399532458 1 0.859638547 0.979433813  
1.331950829 1.224810227 1 1.106773759 1.16569052 1.871720162  
1.105840472 1 0.725681188 0.559858423 0.827722201 1.284341734 1  
1.685167862 1.86062088 3.350797195 1.638553377 1 1.43635135  
1.365344105 1.21234368 1.375233082 1.336848982 1 0.978067223  
1.327206249 0.998606493 0.716193083 1.443485043 1 1.118675405  
1.287699979 0.892226327 1.344576487 1.259955399 1.50519764  
YAR044W YAR044W::OSH1::May be involved in ergosterol synthesis  
0.871751201 0.942941314 1.14386336 0.708773534 1.19377781



|             |                                                                                                                          |             |             |             |             |
|-------------|--------------------------------------------------------------------------------------------------------------------------|-------------|-------------|-------------|-------------|
| 1.195039681 |                                                                                                                          | 1.23215585  |             | 0.580777312 | 0.937871466 |
|             |                                                                                                                          |             |             | 1           |             |
| 0.912358492 | 1.160364751                                                                                                              | 1.186717953 | 0.958140378 | 1           | 0.948641094 |
| 1.073299213 | 1.13869184                                                                                                               | 1.410105888 | 0.778176319 | 1           | 0.95832572  |
| 1.050626901 | 1.044711763                                                                                                              | 1.064359034 | 0.908312285 |             |             |
| YAR050W     | YAR050W::FLO1::cell wall protein involved in flocculation                                                                |             |             |             | 1           |
| 1.50663296  | 1.460803706                                                                                                              | 1.435939454 | 1.620334924 | 1           | 1.445692043 |
| 1.356992746 | 1.21791652                                                                                                               | 1           | 1.19907858  | 1.247355345 | 0.95153041  |
| 1           | 0.712016245                                                                                                              | 0.476628452 | 0.421525153 | 0.798478972 | 1           |
| 0.797908478 | 0.753285928                                                                                                              | 0.836934332 | 1           | 1.010933645 | 0.973627871 |
| 1.082510508 | 1.045064185                                                                                                              |             | 0.882479139 | 0.832445803 | 0.763728718 |
| 0.878447236 | 0.78601846                                                                                                               | 1           | 0.891214245 | 0.826988041 | 0.893953978 |
| 0.949162265 | 0.906798675                                                                                                              | 0.857235872 |             |             |             |
| YOR124C     | YOR124C::UBP2::Ubiquitin-specific protease                                                                               |             |             |             | 1           |
|             |                                                                                                                          |             |             | 0.79803175  |             |
| 0.906685    | 0.91040614                                                                                                               | 1           | 1.120189163 | 1.103797809 | 0.927909935 |
| 0.878296523 | 1                                                                                                                        | 0.974752852 | 1.032820934 | 0.886013202 | 0.929004818 |
| 1.690156983 | 1.424180928                                                                                                              | 1.662744377 | 0.788854992 | 1           | 1.384993891 |
| 1.639771939 | 1                                                                                                                        | 1.011609823 | 1.087787118 | 1.267597615 | 0.850984671 |
| 0.985371736 | 1                                                                                                                        | 1.203890123 | 1.031627956 | 1.337434417 | 1.102038586 |
| 0.704107446 | 1                                                                                                                        | 1.121035728 | 1.130525826 | 1.2263974   | 0.841785865 |
| 0.979006375 | 1.06651008                                                                                                               |             |             |             |             |
| YOR126C     | YOR126C::IAH1::isoamyl acetate-hydrolyzing esterase                                                                      |             |             |             | 1           |
| 2.085026036 | 1.713184098                                                                                                              | 1.653760807 | 1.924830469 | 1           | 1.755302353 |
| 1.725126112 | 1.825413047                                                                                                              | 1.73113917  | 1           | 1.665687012 | 1.692174063 |
| 1.764766854 | 1.560499122                                                                                                              |             |             |             |             |
|             | 1.067079038                                                                                                              | 1.179033698 | 1.1265135   | 0.786309095 | 0.879365396 |
| 1.302210563 | 1.802298599                                                                                                              | 1.416649054 | 1.518851208 | 2.002157415 | 1           |
| 0.960615298 | 1.350900714                                                                                                              | 0.859807484 | 1.217247434 | 0.691102315 | 1.308182219 |
| YOR128C     | YOR128C::ADE2::phosphoribosylamino-imidazole-carboxylase                                                                 |             |             |             | 1           |
| 0.892760226 | 0.768847011                                                                                                              | 1.145736627 | 0.924908943 | 1           | 1.339754654 |
| 1.276865969 | 0.911732557                                                                                                              | 0.747405433 | 1           | 1.436461886 | 1.587696119 |
| 0.706069654 | 0.746981905                                                                                                              |             | 4.334344472 | 3.887621706 | 1.19640746  |
| 0.691775426 | 1                                                                                                                        | 2.479769459 | 1.684273914 | 0.745643714 | 0.751452842 |
| 0.971571569 | 1.172770411                                                                                                              | 0.631990006 | 0.97073727  | 1.251117188 | 1           |
| 0.756837684 | 0.992141491                                                                                                              | 0.689425201 | 0.788111321 | 3.166647831 | 1           |
| 1.022268391 | 0.968544715                                                                                                              | 0.793026573 | 1.531334958 | 5.414700867 | 1.06738564  |
| YOR142W     | "YOR142W::LSC1::alpha subunit of succinyl-CoA ligase (synthetase; ATP-forming), a mitochondrial enzyme of the TCA cycle" |             |             |             | 1           |
|             |                                                                                                                          |             |             | 1.340587283 |             |
| 1.487891868 | 1.515423068                                                                                                              | 1.586016406 | 1           | 1.651445051 | 1.745034548 |
| 1.431056562 | 1.616657528                                                                                                              | 1           | 1.594088131 | 1.798353609 | 1.966464749 |
| 1.231319607 | 1                                                                                                                        | 1.67004212  | 1.891631593 | 1.489199249 | 0.962351897 |
| 0.942529688 | 0.492385301                                                                                                              | 0.852590704 | 1.103846149 | 1           | 1.026486468 |
| 1.162042372 | 1.23159078                                                                                                               | 0.960959898 | 0.805687703 | 1           | 0.973625505 |
| 1.08929864  | 0.979843274                                                                                                              | 0.730120642 | 0.808326281 | 1           | 1.251230902 |
| 1.177127902 | 1.010608307                                                                                                              | 1.048188522 | 1.702586249 | 1.008718805 |             |
| YAR053W     | YAR053W::YAR053W::molecular_function unknown                                                                             |             |             |             | 0.928390408 |
| 0.938386033 | 0.857618004                                                                                                              | 0.889882801 |             | 0.737014326 | 0.955310601 |
| 0.874752319 |                                                                                                                          | 0.688415848 | 0.871558809 |             | 0.725430846 |
| 1.471967765 |                                                                                                                          |             |             |             |             |
| 0.968930563 |                                                                                                                          | 0.914345001 | 0.943377005 | 0.976966338 |             |
| 1.021084798 | 1.189970344                                                                                                              | 1.255320501 | 1.389568339 |             |             |
| 0.974916087 | 0.921811005                                                                                                              | 1.335246904 | 2.575210171 |             |             |
| YDR235W     | YDR235W::PRP42::Required for yeast pre-mRNA splicing                                                                     |             |             |             | 1           |
| 0.852633215 | 0.853934226                                                                                                              | 0.874572875 | 0.851935638 | 1           | 0.843288117 |
| 0.824501148 | 0.882182969                                                                                                              | 0.887025827 | 1           | 0.767649747 | 0.860639107 |
| 0.692116724 | 0.898624576                                                                                                              | 1           | 0.626872433 | 0.638306041 | 0.529200609 |
| 0.602268997 | 1                                                                                                                        | 1.520155557 | 1.569249503 | 1.693394986 | 1.470557033 |

0.865779635 0.912721003 0.996886179 0.775902119 1.078885262 1  
0.973570978 0.77904801 1 1.086177988 0.868858377  
0.887589267 0.892720242 0.96273648 1.80641228  
YAR061W YAR061W::YAR061W::molecular\_function unknown 1 1.094962915  
0.951797314 1.388019601 0.912485976 1 1.246409561 1.311767092  
0.880521623 0.92682279 1 1.092791445 1.185100811 0.710298184  
1.10841546 1 0.975445248 0.897761582 0.826406457 1  
0.344674154 0.384926  
0.899459678 1 0.653421598 0.57076006 0.838695572 0.744936271  
0.5528349 1.002026077 1.019226366  
YDR237W YDR237W::MRPL7::Mitochondrial ribosomal protein MRPL7 (YmL7) 1  
0.882321418 0.983759222 1.051708282 0.953287782 1 0.870100308  
0.918074523 1.470220966 1.254064091 1 0.912698061 0.763428206  
0.953712486 0.988840507 1 0.756882707 0.682082946 0.722528047  
1.261109652 1 1.473251041 1.299388366 2.102605133 1.633575589 1  
1.297174707 1.212935913 0.88179429 1.061961455 1.277573893 1  
0.98794212 1.147161379 0.702841553 1.193066802 1 1.156773462  
1.048416939 0.711807152 1.197807438 0.78370132 1.562988811  
YBL005WA YBL005WA 1 0.8443106 0.771780629 1.408057024 0.735598726 1  
1.092079298 1.09104905 0.726541919 1 1.442894346 1.317555878  
0.598168147 1.140279711 1 0.849223097 1.146575027 0.82887776  
0.710226453 1 0.407254914 0.349141092 0.370203316 0.679160715 1  
0.827645974 0.915414806 1.26402273 1.181223784 0.756059966 1  
1.022447173 1.393455198 3.6553292 5.771192857 1.861801607 1  
1.096058993 1.660142591 2.3602148 1.37502969 0.998926526 0.983325775  
YOR144C "YOR144C::ELG1::Enhanced Level of Genomic instability, Repressor of  
Ty1 Transposition" 0.813880723 0.892833289 1.172935182 1.061202388  
0.950421512 1.013806562 0.92803049 0.818624152 0.650495965  
0.620508567 1.304992283 1 0.612728284 0.580230999  
0.479636805 0.856661579 0.923280166 0.971943451  
0.921417312 0.909442613 1.309000925 1 0.91341008 0.890694796  
0.699488198 1.173234534 0.786851151 1 0.992815997 1.127091454  
0.767225762 1.107861615 0.983325775  
YDR239C YDR239C::YDR239C::molecular\_function unknown 1 0.805556974  
0.830722023 1.02297626 0.781762918 1 0.883177481 0.899217201  
0.980426517 0.742345957 1 1.001783147 0.844647714 0.575435981  
0.959027789 0.940023151 0.784335444 1  
1.243430739 1 0.915215845 1.060996521 0.982122166  
1.099447964 1 1.060878406 0.701773105 0.857489377 1.161340732  
0.802790237 1 0.645849942 0.765586352 0.959232241 0.799773924  
0.616745652 0.858111537  
YBL006C YBL006C::YBL006C::molecular\_function unknown 1 1.207639051  
1.347453893 1.367926614 1.388526899 1 1.326223913 1.237490166  
1.563777477 1.552690759 1 1.259633915 1.523832712 1.652225417  
1.620223951 1 0.978890634 0.707128364 0.767011504 1.0783751 1  
1.062758411 0.92027827 1.015515173 0.854096107 1 1.075999282  
1.015805822 1.259378064 1.18496013 1.082382765 1 0.877049908  
0.926022682 1.12348964 0.921812934 0.887231984 1 1.004265076  
0.898289309 0.956602433 0.813902459 0.877713771 1.541973897  
YOR146W YOR146W::YOR146W::molecular\_function unknown 1 0.783896748  
0.70872305 0.838984598 1.033818361 1 0.632144061 0.652109154  
0.952894812 1.128977978 1 0.479219576 0.410627649 0.413314181  
0.951396217 1 0.246325173 0.20996835 0.192368794 0.534563883 1  
0.660572835 0.437100659 0.27061697 0.845003955 1 0.638390193  
0.786726891 0.955743887 1 0.638171501 0.737082919 0.464693007  
1.17368259 1 0.407206151 0.457936193 0.846675601 1.042711218  
0.499190057 0.880877781

YDR241W YDR241W::BUD26 1 1.307704632 1.130351375 1.528663771 1  
0.983141614 1.522819277 1.314060049 1 1.160754607 1.252246718  
1.620801568 1.680386384 0.604034674 0.719781146 0.635388155 1  
1.109330865 1 0.935314695 0.880605045 0.821360755  
1.050649996 1.125937991 1 0.517451016 0.825487706 0.645720008  
0.68998252 1.519838857 1 0.558910106 1.016373341  
1.269054223  
YBL008W YBL008W::HIR1::Involved in cell-cycle regulation of histone  
transcription 1 0.955086915 0.911093812 1.066003575 0.931550751 1  
1.041789802 1.079854049 0.855672353 0.933151217 1 0.938449036  
0.919669227 0.542807207 0.885653609 1 0.853066253 0.59465964  
0.474465061 0.645738504 1 1.163719754 0.862045132 0.523087729  
0.939961069 1.02992868 1.14672 1.172191987 1.017154901  
0.680334908 0.830011709 0.805366711 0.721416746 0.435117352 1  
1.043446464 1.169591581 1.168827125 0.900166522 0.86344705 0.934290836  
YOR148C YOR148C::SPP2::Required for final stages of spliceosome maturation;  
promotes step 1 of splicing 1 0.88534308 1.244711072 1.049187991  
1.32083236 1 0.9348393 1.085154095 1.338078567 1.548720663 1  
0.954559742 1.201237367 1.511900175 1.202219264 1 0.910247087  
0.589682548 0.806464382 1.11503315 1 1.994636507 2.250050131  
1.874357284 1.254866301 1 1.173509288 1.402366105 1.298001477  
0.824358473 0.997357538 1 1.625164902 1.974472807 1.922845172  
1.902266651 1.383590041 1 1.613376922 1.662265639 1.410067454  
1.110635518 1.410477557 1.217117347  
YEL076WC YEL076WC::YEL076W-C::molecular\_function unknown 1 1.137888111  
0.707670665 1.21777757 1 1.315204805 1.174633585 0.727730048  
0.550455376 1 1.13564914 0.986406482 0.380054671 0.905645659 1  
0.535747215 0.668771167 1  
0.73161932 0.88792819 1.097480416 1.089555793 1.065998764 1  
0.795494644 0.464736974 0.863912168 1.187285636 0.40800017 1  
0.707006147 0.56495836 0.880715527 0.532209264 0.90448299 0.918529598  
YBL010C YBL010C::YBL010C::molecular\_function unknown 1 1.284778437  
1.354833221 1.275734118 1.45357221 1 1.272896907 1.205430501  
1.65486066 1 1.111876534 1.138505916 1.134656728 1.233046504  
0.986605797 0.858186594 1 0.975604449 1.136935559  
1 1.021326687 0.726796204 0.838508267 1.01426641 1  
0.97494571 1.084780716 1.217759507 1.650440191 1 1.069906795  
1.034352154 1.052627255 0.860726066 1.132691109 0.962310756  
YOR150W YOR150W::MRPL23::mitochondrial ribosomal protein of the large  
subunit 1 1.145535259 1.553602801 1.20698434 1.285906548 1  
1.041566455 1.193838244 1.716697111 1.727255563 1 1.035384835  
1.051864708 1.620319902 1.258199883 1 1.351222391 0.950667824  
0.892277577 1.524341189 1 2.102409448 1.71981854 1.738103519  
1.73393619 1 1.071366452 1.324355127 1.036062258 1.033358088  
1.11825458 1 1.09112333 1.221870746 0.910121968 0.651032504  
1.324300736 1 1.353960584 1.371646376 0.918175334 1.473306712  
1.775710314 1.47980461  
YML032CA YML032CA 1 0.91164561 0.653979787 1.076238726 1  
0.934685731 0.95407252 0.863772601 0.661181689 1 0.956877952  
0.743022529 0.329200701 0.934341671 2.152746074 1.420195976  
1 0.984841732 0.888654972 1.230557483  
1.299467166 0.962559143 1 0.751032125 0.597973233 0.859758515  
0.610542956 0.270825983 1 0.879609532 0.552728889 0.963517184  
0.581979301 0.63936533 0.696121095  
YBL012C YBL012C::YBL012C::molecular\_function unknown 1 0.886772475  
0.762456793 0.951538266 0.478571825 1 1.067935541 1.092750462  
0.605477701 0.659384045 1 1.038801089 1.029812718 0.420322783

|             |                                                                                                 |             |             |             |             |             |   |
|-------------|-------------------------------------------------------------------------------------------------|-------------|-------------|-------------|-------------|-------------|---|
| 0.800303696 | 1                                                                                               | 0.862711041 | 1.047170033 | 1.030260747 | 0.833484312 | 1           |   |
| 0.737517485 | 0.923008095                                                                                     | 0.458768092 | 0.692080927 | 1           | 0.763116106 |             |   |
| 0.787281401 | 0.872048627                                                                                     | 0.88020114  | 1           | 0.895219235 | 0.54548608  |             |   |
| 0.720829128 | 0.663080427                                                                                     | 0.618755191 | 1           | 0.84162919  | 0.686434861 |             |   |
| 0.684552445 | 0.750211895                                                                                     | 0.698747933 |             |             |             |             |   |
| YOR152C     | YOR152C::YOR152C::molecular_function                                                            | unknown     |             |             | 1.06875708  |             |   |
| 0.916748498 | 1.095783101                                                                                     | 1.043580939 |             | 0.816030702 | 0.992937311 |             |   |
| 0.902311372 | 1.046977005                                                                                     |             | 0.933159155 | 1.024927754 | 0.89044732  |             |   |
| 0.857594351 |                                                                                                 |             |             |             |             | 1           |   |
| 0.849381391 | 0.652942605                                                                                     | 0.747666962 | 1.135096128 | 1.221261883 | 1           |             |   |
| 0.894583666 | 0.539843021                                                                                     | 0.433229439 | 0.505733747 | 1.435671142 | 1           |             |   |
| 0.764637044 | 0.565628024                                                                                     | 0.560359597 | 1.240246439 | 0.843584173 | 1.260022945 |             |   |
| YBL014C     | YBL014C::RRN6::involved in the transcription of 35S rRNA genes by RNA polymerase I              | 1           | 1.06571693  | 0.835323866 | 0.997701669 | 0.83887993  | 1 |
| 0.954936292 | 1.073902744                                                                                     | 0.783215953 | 0.863919794 | 1           | 0.892655065 |             |   |
| 0.785876434 | 0.60302602                                                                                      | 0.955481014 | 1           | 0.698787689 | 0.934353418 |             |   |
| 1.002750732 | 0.767879662                                                                                     | 1           | 0.664255917 | 0.68947576  | 0.25967741  |             |   |
| 0.959712629 | 1                                                                                               | 0.910921754 | 0.825488351 | 0.736776213 | 1.023852746 |             |   |
| 0.843542281 | 1                                                                                               |             | 0.784115747 | 0.748475596 | 1.110922058 | 1           |   |
| 0.745535473 | 1.088031882                                                                                     | 0.95800524  | 1.361006768 | 0.991531745 | 0.898390244 |             |   |
| YBL028C     | YBL028C::YBL028C::molecular_function                                                            | unknown     | 1           | 0.887887267 |             |             |   |
| 0.947949869 | 0.905031441                                                                                     | 1.383065161 | 1           | 0.699340576 | 0.672837401 |             |   |
| 1.065131539 | 1.121393444                                                                                     | 1           | 0.634297936 | 0.618741246 | 0.566430137 |             |   |
| 0.920261326 |                                                                                                 | 0.610549713 | 0.487182957 | 0.594975989 | 1.030098969 | 1           |   |
| 0.910693244 | 0.53689715                                                                                      | 0.24686987  | 0.875894724 | 1           | 0.744375196 |             |   |
| 0.649781702 | 0.426874154                                                                                     | 0.636940667 | 0.865783137 | 1           | 1.004317487 |             |   |
| 0.921069715 | 0.745956059                                                                                     | 1.110597556 | 1.795572813 | 1           | 0.82255856  |             |   |
| 1.046911624 | 1.056276066                                                                                     | 2.070191084 | 0.725699264 |             |             |             |   |
| YOR166C     | YOR166C::YOR166C::molecular_function                                                            | unknown     | 1           | 1.079579036 |             |             |   |
| 1.069824919 | 1.14940903                                                                                      | 1.191329724 | 1           | 1.007952605 | 0.996257976 |             |   |
| 1.287629602 | 1.122487479                                                                                     | 1           | 0.867018038 | 0.963942333 | 0.8403624   |             |   |
| 1.133213501 | 1                                                                                               | 0.784154317 |             | 0.630853735 | 1           | 1.133379877 |   |
| 1.35631761  | 0.914795281                                                                                     | 0.95883312  | 1           | 0.95143403  | 1.062500714 |             |   |
| 0.957389731 | 1.219806323                                                                                     | 1           | 0.897473716 | 1.059612632 | 1.049312334 |             |   |
| 1.09852792  | 1.373808257                                                                                     | 1           | 1.101220287 | 1.243143488 | 1.159017773 |             |   |
| 1.116263741 | 1.317614981                                                                                     | 1.14881872  |             |             |             |             |   |
| YBL030C     | YBL030C::PET9::the major mitochondrial ADP/ATP translocator; highly homologous to AAC1 and AAC3 | 1           | 1.22908777  | 0.85134331  | 0.800042455 |             |   |
| 0.729705481 | 1                                                                                               | 1.234148303 |             | 0.567661817 | 0.689726341 | 1           |   |
| 1.094550645 | 0.777613266                                                                                     | 0.713510386 | 0.425848557 | 1           | 0.870018996 |             |   |
| 0.70535059  | 0.640899415                                                                                     | 0.867120686 | 1           | 0.73857509  | 0.36494174  |             |   |
| 0.439731187 | 1.096644729                                                                                     | 1           | 0.967830056 | 0.827162137 | 0.84492358  |             |   |
| 0.824352885 | 0.736989839                                                                                     | 1           | 0.732746494 | 0.568468972 | 0.364986802 |             |   |
| 0.315494051 | 0.498389222                                                                                     | 1           | 0.957116565 | 0.662601742 | 0.459088857 |             |   |
| 0.802859814 | 0.990148914                                                                                     | 1.159326177 |             |             |             |             |   |
| YOR168W     | YOR168W::GLN4::glutaminyl-tRNA synthetase                                                       | 1           | 1.074430381 |             |             |             |   |
| 0.907637272 | 1.127876436                                                                                     | 0.814198931 | 1           | 1.130800109 | 1.124549859 |             |   |
| 0.841506553 | 0.862962956                                                                                     | 1           | 0.937294744 | 0.714103626 | 0.44280531  |             |   |
| 0.92393872  | 1                                                                                               | 0.690023737 | 0.385641186 | 0.495999259 | 0.491763632 | 1           |   |
| 0.798141083 | 0.388837515                                                                                     | 0.372759574 | 0.649401007 | 1           | 0.987270098 |             |   |
| 0.916393673 | 1.011134643                                                                                     | 1.114423169 | 0.950239845 | 1           | 1.011793748 |             |   |
| 0.764798758 | 0.691979191                                                                                     | 0.834162123 | 0.915706025 | 1           | 0.818763042 |             |   |
| 0.76668968  | 0.87326278                                                                                      | 1.031218476 | 0.735411658 | 0.672479238 |             |             |   |
| YOR170W     | YOR170W::YOR170W::molecular_function                                                            | unknown     | 1           | 1.52158117  |             |             |   |
| 1.858538533 | 1.118485637                                                                                     | 2.063454096 | 1           | 1.179638779 | 1.08444657  |             |   |
| 1.792278576 | 1.702166261                                                                                     | 1           | 1.182504691 | 1.1713995   | 1.903291795 |             |   |
| 1.265441488 | 1                                                                                               | 1.51951969  | 1.224344908 | 1.270183358 | 1.346322422 | 1           |   |

|             |                                                                                   |             |             |             |             |             |             |
|-------------|-----------------------------------------------------------------------------------|-------------|-------------|-------------|-------------|-------------|-------------|
| 1.676035247 | 2.828416013                                                                       | 1.814909473 | 1.320129718 | 1           | 1.023014675 |             |             |
| 0.811038532 | 0.824711469                                                                       | 0.811093672 | 0.929531214 | 1           | 1.038796868 |             |             |
| 1.190118965 | 1.163355336                                                                       | 1.442542333 | 0.889404339 | 1           | 1.379034888 |             |             |
| 1.509752536 | 1.630872165                                                                       | 1.37317687  | 1.421673419 | 1.419386549 |             |             |             |
| YOR172W     | YOR172W::YOR172W::molecular_function unknown                                      |             |             |             | 1           | 0.939081571 |             |
| 0.911395885 | 1.206104924                                                                       | 0.814770658 | 1           | 1.172754138 | 1.27671815  |             |             |
| 0.999325245 | 0.929836252                                                                       | 1           | 1.201832055 | 1.081240261 | 0.823110698 | 1           |             |
| 1.379318829 |                                                                                   |             | 0.975571945 |             | 1.036038712 | 1           |             |
|             | 0.986909368                                                                       | 0.884950022 | 0.990485752 | 1.174073752 | 1           |             |             |
| 0.51670732  | 1.09707901                                                                        | 0.646505144 | 1           | 0.965170336 | 0.613583598 |             |             |
| 0.98959988  | 0.380629478                                                                       | 0.876744015 | 0.626946802 |             |             |             |             |
| YOR174W     | YOR174W::MED4::Member of RNA Polymerase II transcriptional regulation mediator    |             |             |             |             | 1           |             |
| 1.071119483 | 1.086221702                                                                       | 1.669761207 | 1.515077564 | 1           | 1.084334209 |             |             |
| 1.020563488 | 1.353959514                                                                       | 1.512408104 | 1           | 0.930481491 | 0.727525099 |             |             |
| 0.960908628 | 1                                                                                 | 1.445049522 | 1.416639332 | 1.271170775 | 1           |             |             |
| 1.032023068 | 1.190407729                                                                       | 0.802849163 | 0.781739368 | 1.064892509 | 1           |             |             |
| 0.916867231 |                                                                                   | 1.048029687 | 2.033222373 | 1           | 1.491671382 |             |             |
| 0.959090551 | 1.418510884                                                                       |             |             |             |             |             |             |
| YML035CA    | YML035CA::YML035C-A::molecular_function unknown                                   |             |             |             |             | 1           |             |
| 0.945998395 | 0.781859022                                                                       | 1           | 0.916918144 | 1.180230267 | 1.060940502 |             |             |
| 0.858979817 | 1                                                                                 | 1.159696809 | 1.25565274  | 0.685774944 | 1.23603007  | 1           |             |
|             | 0.606858716                                                                       |             |             |             | 1           | 1.179815744 |             |
| 0.854838637 | 1.283711309                                                                       | 1.36603473  | 1           | 1.016422789 | 0.544807897 |             |             |
| 0.880276168 | 1.220777661                                                                       | 1           |             | 0.410280046 | 1.084187814 |             |             |
| 0.278463848 | 0.805014703                                                                       |             |             |             |             |             |             |
| YPR180W     | YPR180W::AOS1::along with Uba2p forms a heterodimeric activating enzyme for Smt3p |             |             |             |             | 1           |             |
| 0.764668545 | 0.812945314                                                                       | 1.224335714 | 0.964837363 | 1           | 0.811203867 |             |             |
| 0.889125461 | 1.048352243                                                                       | 0.898477962 | 1           | 0.935956361 | 0.71058373  |             |             |
| 0.720666934 | 1.152740694                                                                       | 1           | 1.588394217 | 2.259624134 | 1.893452137 | 1           |             |
| 0.889409077 | 1.168057078                                                                       | 0.910600744 | 0.73573459  | 0.960425547 | 1           |             |             |
| 1.046961092 | 1.243242218                                                                       | 1.200188137 | 0.960885537 | 1.168235285 | 1           |             |             |
| 1.155204456 | 1.041266425                                                                       | 1.009324403 | 0.662296312 | 1.322693045 | 0.858111537 |             |             |
| YPR150W     | YPR150W::YPR150W::molecular_function unknown                                      |             |             |             |             | 1           | 1.238614692 |
| 1.08908616  | 1.209286451                                                                       | 1           | 1.288933918 | 1.226311144 | 0.986200787 |             |             |
| 0.874715481 | 1                                                                                 | 1.080921047 | 1.174945684 | 1.2242808   | 0.956109804 | 1           |             |
| 1.692417224 | 1.145928491                                                                       | 1.675761826 | 1.164952242 | 1           | 1.233214882 |             |             |
| 1.316825467 | 1.991332513                                                                       | 1.182790265 | 1           | 0.834533523 | 0.771544958 |             |             |
| 1.084102162 | 1.041226065                                                                       | 0.964778754 | 1           | 0.7459835   | 0.645093878 |             |             |
| 0.865982533 | 1.04968676                                                                        | 0.628913435 | 1           | 0.809188031 | 0.673950908 |             |             |
| 1.118408468 | 1.095960663                                                                       |             |             |             |             |             |             |
| YPR182W     | YPR182W::SMX3::Sm or Sm-like snRNP protein                                        |             |             |             |             | 1           | 1.191477981 |
| 1.500783202 | 1.151913799                                                                       | 1.564068904 | 1           | 1.044772465 | 1.086909022 |             |             |
| 1.487201549 | 1.547616238                                                                       | 1           | 1.357010929 | 1.240128857 | 1.835926841 |             |             |
| 1.35749272  | 1                                                                                 | 0.777417    | 0.710164954 | 0.538804261 | 1.019962666 | 1           |             |
| 1.624765037 | 2.190417394                                                                       | 1.319787201 | 1.017768797 | 1           | 1.204863032 |             |             |
| 1.109373409 | 1.229386877                                                                       | 1.073791166 | 0.982672296 | 1           | 1.096620865 |             |             |
| 1.349297938 | 1.322862347                                                                       | 1.100643104 | 1.217941522 | 1           | 0.911775608 |             |             |
| 0.889274842 | 1.26130516                                                                        | 1.041834212 | 0.947033988 |             |             |             |             |
| YBL032W     | YBL032W::HEK2::Heterogeneous nuclear RNP K-like gene                              |             |             |             |             | 1           |             |
| 1.290525197 | 1.426466753                                                                       | 1.287056552 | 1.338227806 | 1           | 1.303601362 |             |             |
| 1.19520192  | 1.191689753                                                                       | 1.18879282  | 1           | 1.211918258 | 1.188762972 |             |             |
| 1.355118661 | 1.023289278                                                                       | 1           | 0.732230752 | 0.397880537 | 0.473818739 |             |             |
| 0.782321871 | 1                                                                                 | 1.123796996 | 1.229600908 | 0.583229742 | 0.699623521 | 1           |             |
| 1.029039935 | 0.82852442                                                                        | 0.708288739 | 0.885064283 | 0.757878057 | 1           |             |             |

0.975679735 0.984760325 0.810393777 0.650696774 0.923160834 1  
 1.1234522 1.125187772 0.923699511 1.084898294 1.269700405 0.833594067  
 YPR152C YPR152C::YPR152C::molecular\_function unknown 1 0.655361279  
 0.81596305 0.692447392 1 0.872614597 0.904845472 1.029785462  
 1.102924166 1 0.721706717 0.70633503 0.508140826 1.044912024 1  
 0.501559342 0.386979981 0.708114219 1 1.043272422  
 1.154625114 0.935866418 1 0.802907586 0.873662925 0.930589909  
 1.149089417 1.166163647 1 0.939878033 0.615345429 0.695198818  
 1.344318553 1 1.219237703 0.740819115 1.564485312 0.293045823  
 1.524993481 1.081395653  
 YBL034C YBL034C::STU1::Suppressor of cold-sensitive tub2 mutation; shown to  
 be a component of the mitotic spindle 1 1.460351646 1.246190519  
 1.46949033 1.425278238 1 1.362454174 1.145624185 1.135252097  
 1.288973785 1 1.047634763 1.067530689 0.933435319 1.342087419 1  
 0.628879826 0.793189113 1 1  
 1.1185607 1.238031132 0.945895856 1.047131274 1 1.130026839  
 1.129301075 1.224284129 1.021507228 0.655270218 1.029466077  
 1.005769191 0.95197687 0.766120544 0.86114602 3.097957806  
 YPR184W YPR184W::GDB1::Glycogen debranching enzyme; the enzyme that  
 debranches the glycogen having a glucanotranferase + 1-6amyloglucosidase  
 activity 1 0.995485212 1.282951006 1.726552535 0.775027432 1  
 1.576020995 2.287030143 1.23646904 0.973964129 1 1.386939772  
 2.025991799 1.465466723 1.4540634 1 1.845934298 2.228035848  
 2.717608363 1.00912573 1 0.935368729 1.375888723 0.969975446 1  
 0.993525896 1.096505547 1.21614171 1.143063773 0.971182246 1  
 0.920285142 0.921665852 1.63262775 1.934498977 0.838920525 1  
 1.012545823 1.11343933 1.326642562 1.028836462 1.928298376  
 YBL036C YBL036C::YBL036C::molecular\_function unknown 1 0.81882221  
 0.907848234 0.816081189 1.142553086 1 0.804143778 0.759656169  
 0.950518191 1.016571416 1 0.730604941 0.726256188 0.854823086  
 0.961912637 1 0.964180453 0.559842972 0.669265401 0.949106817 1  
 0.967191352 0.898524804 0.810526513 1.033631417 1 0.877464494  
 0.917975005 0.840153099 0.817077046 0.9083175 1 1.000747089  
 1.135480024 1.184288206 1.044139318 1.272610128 1 1.127907802  
 1.21282626 1.00671085 1.216339784 0.880385376 1.246888598  
 YOR176W "YOR176W::HEM15::Performs last step in heme biosynthesis pathway,  
 inserting ferrous iron into protoporphyrin IX" 1 1.221666259 1.080583541  
 1.250005308 1.086140247 1 1.284422677 1.332364289 1.019221042  
 1.030345409 1 1.001301825 0.955571739 1.285380382 1.080990239 1  
 1.025903622 0.613595107 1.169366114 0.844552003 1 0.911411465  
 0.452776376 0.797020291 1.026238227 1 0.626566713 0.308801646  
 0.247210012 1.181569997 0.889177858 1 0.538007298 0.192078513  
 0.141750776 0.280417866 1.112579492 1 0.454098551 0.168516922  
 0.563464837 0.974756329 1.16412948 0.794190973  
 YPR154W YPR154W::PIN3::[PSI+] induction 1 1.684034703 1.470404341  
 0.87381314 1 1.220275411 1.073198879 0.960085982 0.720459486 1  
 1.452414864 1.198526454 1.569212914 0.599420809 1 1.903550619  
 1.395054438 1.059264128 1 1.266045316 1.586110984 1.255452365  
 1.472771891 1 1.17492922 1.006237857 0.978290583 1.086351691  
 0.919210307 1 0.775383401 0.81991094 0.727109671 0.795907071  
 0.918675833 1 0.819724213 0.624481537 0.658096008 0.494826014  
 0.87503805 0.866867768  
 YBL038W YBL038W::MRPL16::Mitochondrial ribosomal protein MRPL16 1  
 1.251433175 1.609829179 1.261362783 2.120613175 1 1.147875764  
 1.198162786 1.702341761 1.7207213 1 1.017702353 1.306440524  
 1.686332798 1.418834644 1 0.936956472 0.747930737 0.576726229  
 1.524770551 1 1.903893827 2.085012612 2.223759095

|         |                                                                                                                                                           |             |             |             |             |
|---------|-----------------------------------------------------------------------------------------------------------------------------------------------------------|-------------|-------------|-------------|-------------|
|         | 0.949217008                                                                                                                                               |             |             | 1.338990617 | 1.097366259 |
|         | 0.88315928                                                                                                                                                |             | 1.47053625  | 1.305555433 |             |
| YOR190W | YOR190W::SPR1::Sporulation regulated genes                                                                                                                |             |             | 1           | 1.262872582 |
|         | 1.021876606                                                                                                                                               | 1.329468065 | 1.058076111 | 1           | 1.200692951 |
|         | 1.135519146                                                                                                                                               | 1.157790768 | 1           | 1.175179088 | 0.983881575 |
|         | 1.187893811                                                                                                                                               | 1           | 1.28811541  | 1.338448119 | 1.267736168 |
|         | 0.924903933                                                                                                                                               | 0.896820167 | 1.509959728 | 1.250527337 | 1           |
|         | 1.092356466                                                                                                                                               |             | 1           |             |             |
|         |                                                                                                                                                           | 0.919405158 |             |             |             |
| YBL052C | "YBL052C::SAS3::SAS3 for Something about silencing, gene 3. Influences silencing at HMR." 1                                                               |             |             |             |             |
|         | 1.177716429                                                                                                                                               | 1           | 1.208052116 | 1.11089928  | 0.865342834 |
|         | 0.948703832                                                                                                                                               | 0.863492187 | 0.602866386 | 1.071177712 | 1           |
|         | 0.4395779                                                                                                                                                 | 1           | 0.575754752 |             | 1           |
|         | 0.832829204                                                                                                                                               | 0.662950296 | 0.7623853   | 0.994073826 | 1           |
|         | 0.687555419                                                                                                                                               |             | 0.899708447 | 0.7527428   | 1           |
|         | 1.341290577                                                                                                                                               | 1.140839738 | 1.352304993 | 0.860738375 |             |
| YOR192C | YOR192C::YOR192C::not yet annotated 1                                                                                                                     |             |             |             |             |
|         | 1.206871352                                                                                                                                               | 0.882859372 | 1           | 1.096778377 | 1.344873744 |
|         | 1.06082486                                                                                                                                                | 1           | 1.394249328 | 0.937781703 | 0.908035509 |
|         | 1.169909984                                                                                                                                               |             | 0.847813915 | 1           |             |
|         | 0.971202624                                                                                                                                               | 0.709747541 | 1.308185589 | 1.666666455 | 1.073609127 |
|         | 0.670432234                                                                                                                                               | 0.713943253 | 0.74118894  | 0.974653428 | 0.747296005 |
|         | 0.770383235                                                                                                                                               | 0.573361208 |             | 0.967897679 | 0.840090688 |
| YBL054W | YBL054W::YBL054W::molecular_function unknown 1                                                                                                            |             |             |             |             |
|         | 1.35692174                                                                                                                                                |             | 1.542153677 | 1           | 1.602893068 |
|         | 2.26327743                                                                                                                                                | 1           | 0.870808967 |             | 1.161284948 |
|         |                                                                                                                                                           |             |             |             | 1.047677578 |
|         | 0.931520563                                                                                                                                               | 0.988946082 | 0.958785719 | 1           | 0.925376755 |
|         | 0.888718951                                                                                                                                               | 0.844357419 | 1.047816365 | 1           | 1.206078382 |
|         | 0.936971942                                                                                                                                               | 1.104027773 | 1.000170753 | 1.478928945 |             |
| YOR194C | "YOR194C::TOA1::Transcription factor IIA, large chain"                                                                                                    |             |             |             |             |
|         | 0.643963103                                                                                                                                               | 1.059100748 | 0.957132983 | 0.988758681 | 0.866881273 |
|         | 0.83477031                                                                                                                                                | 1.058659053 | 1.022196435 |             | 0.843942386 |
|         | 1.073912189                                                                                                                                               | 1.060245033 | 1           | 1.183335963 | 1.158381415 |
|         | 1.017261575                                                                                                                                               | 1           | 1.454592076 | 1.292056697 | 1.161496097 |
|         | 0.956151302                                                                                                                                               | 1.26683052  | 1.130710441 | 1.253082845 | 1.202504532 |
|         | 1.090126078                                                                                                                                               | 0.917393022 | 0.895070132 | 1.383335019 | 1.042324087 |
|         | 0.776282928                                                                                                                                               | 0.714023961 | 0.995894654 | 0.700792627 | 1.294383046 |
| YBL056W | YBL056W::PTC3::protein phosphatase type 2C 1                                                                                                              |             |             |             |             |
|         | 1.102554463                                                                                                                                               | 1.416324129 | 1.183616182 | 1           | 1.444286587 |
|         | 1.099533062                                                                                                                                               | 1.186718969 | 1           | 1.126943314 | 1.333684965 |
|         | 1.040339732                                                                                                                                               | 1           | 1.14831001  | 1.241863587 | 1.015044371 |
|         | 1.214839238                                                                                                                                               | 0.897706341 | 0.873574994 | 1.131984325 | 1           |
|         | 1.193857982                                                                                                                                               | 1.216255331 | 1.141469754 | 1.061707933 | 1           |
|         | 1.293568345                                                                                                                                               | 1.279870685 | 0.742915686 | 0.828017057 | 1           |
|         | 1.454771535                                                                                                                                               | 1.103245956 | 1.176619843 | 1.471709998 | 1.032360714 |
| YBL058W | YBL058W::SHP1::isolated as a suppressor of the lethality caused by overexpression of the phosphoprotein phosphatase 1 catalytic subunit encoded by GLC7 1 |             |             |             |             |
|         | 0.966903671                                                                                                                                               | 0.988554687 |             | 1           | 0.851607373 |
|         | 0.945648591                                                                                                                                               | 1           | 1.249713861 | 1.035649496 | 1.233334085 |
|         | 1.5215581                                                                                                                                                 | 1.343435255 | 1.19797981  | 1.242491345 | 1           |
|         | 1.515720983                                                                                                                                               | 1.419811326 | 0.954917363 | 1.042279198 | 1           |
|         | 1.444988199                                                                                                                                               | 1.56522633  | 0.971267304 | 1.065814897 | 1           |
|         | 1.122006411                                                                                                                                               | 1.078498898 | 0.735076066 | 0.863686782 | 0.995584457 |

YOR196C      YOR196C::LIP5::Involved in lipoic acid metabolism      1  
0.884176357 0.963070173 0.911851761 0.929160714 1      0.853757436  
0.81525066 1.089663228 0.969841724 1      0.751428491 0.757713618  
0.71623817 1.249877513 1      0.685725506 0.55273916 0.736742347  
0.906986575 1      1.291849104 0.750168936 0.907413936 0.98532485 1  
0.502085774 0.355430412 0.321015004 1.252554345 0.917438128 1  
0.344228251 0.214324946 0.201294729 0.355767957 1.172055301 1  
0.430375438 0.295320999 0.782318013 1.16213446 1.142140745 1.008718805  
YBL060W      YBL060W::YBL060W::molecular\_function unknown      1      0.868868787  
0.874553137 1.08575081 0.920534171 1      1.008290766 0.986895454  
0.877324864 0.894417261 1      1.011247956 0.997289281 0.662080337  
0.977356575      1.285318835 1.272088888 1.092044575 1.373923719 1  
0.615275823 0.437322372 0.29793695 0.649261799 1      0.851328133  
0.898863161 0.8576093      0.813025285 1.050983109 1      1.08597143  
0.972216029 1.161776694 0.983587583 1.080931886 1      0.882536493  
0.964071203 1.07085863 0.901378874 0.988217562 1.12430125  
YOR198C      YOR198C::BFR1::Multicopy suppressor of BFA (Brefeldin A)-induced  
lethality; implicated in secretion and nuclear segregation      1      0.86285421  
0.816109827 0.912094358 1.060096788 1      0.900275222 0.901196725  
0.784613496 0.773984907 1      0.898397388 0.850223934 0.616954793  
0.762881675 1      1.509717017 1.582936214 1.405879906 1.068223875 1  
0.642606256 0.382180329 0.334597907 0.651700953 1      0.966276255  
1.178709621 1.052291802 1.04117814 0.861455304 1      1.012231216  
1.295301145 1.144560096 0.839591893 1.102502739 1      1.168809182  
1.334698239 1.279392627 1.226971742 1.515521105 1.074390646  
YBL062W      YBL062W::YBL062W::molecular\_function unknown      1      1.069875358  
1.273184269 1.033171441 1.557435881 1      1.01309948 1.038863801  
1.329225781 1.353927385 1      1.125079778 1.148520116 1.094514177  
1.079889219 1      1.007247894 0.891533055 0.530063065 0.870885591 1  
1.423133171 1.212601866 0.609514821 0.845401479 1      0.67807575  
0.694382953 0.531612263 0.476112164 0.681250527 1      0.947986098  
0.990360379 0.689759045 0.726105247 1.215953888 1      0.957999496  
1.014385047      1.425040909 1.101229913 1.198729219  
YOR200W      YOR200W::YOR200W::molecular\_function unknown      1      1.102505245  
1.298316329 0.946487503 1.346001443 1      0.961173013 1.112484686  
1.304714533 1.477730846 1      1.316971939 0.931563129 1.337948456  
0.971200626 1      1.268554061 0.823762453 0.728951944 1.011874151 1  
1.782251443 2.587834984 1.632205426 0.979174711 1      0.961723911  
0.940131493 1.021473216 0.957327882 0.997293955 1      0.990724537  
1.189331395 1.026717416 0.836185507 1.999470924 1      0.87966314  
1.200844957 1.103891701 1.449216503 1.677840651 1.234629811  
YOR214C      YOR214C::YOR214C::molecular\_function unknown      1  
1.605886735      1      1.571984202      1.811634747      1  
1.705753269 1.387629232 1      1.143079513      1.930945891  
0.308504238 0.250481064      0.227211013      0.800023933 0.983908674  
0.739558625 1.000580707 0.947303289 1      1.031394345 1.042336221  
1.228058728      1.122731156 1      1.315685204  
YOR216C      YOR216C::RUD3::Relieves usol-1 transport defect; golgin-160 related  
protein      1      0.761477398 0.830321795 0.958750261 1.057005454 1  
0.814068483 0.915245272 1.070792133 0.92988664 1      0.686186618  
0.88037677 0.859618588 1.031534581      0.781169858  
0.750324953      1      0.978893808 1.185491836 0.965215101  
0.73513057 1.112757289      0.937905785 1.073416967 1.00150359  
1.283031855 1.441884514 1      1.29856608 1.424311642 1.346657516  
1.327244618 1.631004267 1.280162299  
YOR218C      YOR218C::YOR218C::molecular\_function unknown      1      1.526864394  
1.603741175 1.270303913 1.692980225 1      1.244045252 1.140364053



|             |                                                                                                                                                                                  |             |             |             |             |
|-------------|----------------------------------------------------------------------------------------------------------------------------------------------------------------------------------|-------------|-------------|-------------|-------------|
| 1.884137526 | 1.574351683                                                                                                                                                                      | 1           | 1.404721005 | 1.230763061 | 1.670648876 |
| 1.383152671 | 1                                                                                                                                                                                | 1.025226903 | 0.644269924 | 1.101616255 | 0.978512349 |
| 1.157770887 | 1.390617641                                                                                                                                                                      | 1.563401438 | 0.901985587 | 1           | 1.151373857 |
| 1.001887105 | 0.954300853                                                                                                                                                                      | 1.027472448 | 0.897381437 | 1           | 0.955220303 |
| 1.392536788 | 0.982822154                                                                                                                                                                      | 0.844241184 | 1.416589952 | 1           | 1.286077925 |
| 1.488170728 | 1.170492938                                                                                                                                                                      | 1.521519807 | 1.217993012 |             |             |
| YBL076C     | YBL076C::ILS1::cytoplasmic isoleucyl-tRNA synthetase 1                                                                                                                           |             |             |             |             |
| 0.952826121 | 0.747657545                                                                                                                                                                      | 1.17788703  | 0.821923675 | 1           | 1.183738693 |
| 1.136046099 | 0.744191168                                                                                                                                                                      | 0.771175886 | 1           | 1.108532577 | 0.983091769 |
| 0.436587198 | 0.839861926                                                                                                                                                                      | 1           | 1.025563934 | 0.991661529 | 0.790366642 |
| 0.613165884 | 1                                                                                                                                                                                | 0.554084329 | 0.405739251 | 0.26406064  | 0.573515564 |
| 0.978458205 | 0.762522237                                                                                                                                                                      | 1.027102948 | 1.19766673  | 0.802212286 | 1           |
| 1.103151329 | 0.502067873                                                                                                                                                                      | 0.963321319 | 0.721139314 | 0.322031978 | 1           |
| 0.843526508 | 0.635441205                                                                                                                                                                      | 0.843967078 | 0.564260518 | 0.46282702  | 0.490349442 |
| YBL078C     | "YBL078C::AUT7::Forms a protein complex with Aut2p to mediate attachment of autophagosomes to microtubules. Defective in maturation of the vacuolar protein, aminopeptidase I" 1 |             |             |             |             |
| 0.708563564 | 1.199648498                                                                                                                                                                      | 1.07825795  |             |             |             |
| 1.53923083  | 1                                                                                                                                                                                | 0.976591722 | 1.150440867 | 1.083105469 | 1.188859069 |
| 1.123433473 | 1.68087366                                                                                                                                                                       | 2.093378822 | 1.076069253 | 1           | 2.327230751 |
| 2.505594183 | 2.775783679                                                                                                                                                                      | 1           | 3.489541952 | 3.15352769  | 3.04488024  |
| 2.750750716 | 1                                                                                                                                                                                | 1.051746779 |             |             | 1           |
| 1.062589611 | 0.849152708                                                                                                                                                                      | 0.721824503 | 1.236951713 |             | 1.092793179 |
| 0.85083584  |                                                                                                                                                                                  | 1.274908518 |             |             |             |
| YBL080C     | "YBL080C::PET112::May serve important general function in mitochondrial gene expression, probably in translation; required for translation of COX2 mRNA" 1                       |             |             |             |             |
| 1.002274957 | 1.005142945                                                                                                                                                                      | 1.082216173 | 0.959724249 | 1           |             |
| 0.840792569 | 0.986581547                                                                                                                                                                      | 1.08129656  | 0.91840825  | 1           | 0.899922343 |
| 1.035824553 | 1.153117479                                                                                                                                                                      | 1           | 1.30808865  | 0.817630368 | 1.245889495 |
| 1.479133637 | 1                                                                                                                                                                                | 1.322668441 | 1.272915852 | 0.890284446 |             |
| 0.67334396  | 1.04557557                                                                                                                                                                       | 1.021910989 | 0.873624124 | 1           |             |
| 1.273566692 | 3.1983691                                                                                                                                                                        | 1.114838247 | 1.151905624 | 1           | 1.11844952  |
| 0.880454923 | 0.798440955                                                                                                                                                                      | 1.181608405 | 0.714946345 | 0.785434741 |             |
| YOR220W     | YOR220W::YOR220W::molecular_function unknown 1                                                                                                                                   |             |             |             |             |
| 1.259680568 |                                                                                                                                                                                  |             |             |             |             |
| 1.419396851 | 1.696687997                                                                                                                                                                      | 1.240718728 | 1           | 1.626880217 | 1.840705325 |
| 1.63372214  | 1.36928962                                                                                                                                                                       | 1           | 2.027341924 | 2.307554955 | 2.578382959 |
| 1.633148161 | 1.624099424                                                                                                                                                                      | 1.264707276 | 0.863952489 | 1.166253538 |             |
| 0.659749181 | 0.913502678                                                                                                                                                                      | 1.221938565 | 1           | 1.358629155 | 2.1114109   |
| 1.683059931 | 0.933334591                                                                                                                                                                      | 1.126519965 | 1           | 1.441754552 | 1.666275588 |
| 2.385611281 | 1.594161236                                                                                                                                                                      | 1.158847927 |             |             | 1.067715635 |
| 1.550533374 | 1.111166903                                                                                                                                                                      |             |             |             |             |
| YBL082C     | "YBL082C::RHK1::Resistance to Hansenula Killer 1, hypothetical F-458 protein" 1                                                                                                  |             |             |             |             |
| 1.43092885  | 0.859618876                                                                                                                                                                      | 0.944843556 | 0.641753986 | 1           |             |
| 1.14697392  | 0.981561129                                                                                                                                                                      | 0.758495683 | 0.942791578 | 1           | 1.243534653 |
| 0.901282286 | 0.693819059                                                                                                                                                                      | 0.854036258 | 1.202485123 |             | 0.65845446  |
| 0.782545139 | 1                                                                                                                                                                                | 0.681011345 |             | 1           | 0.931753819 |
| 0.940867641 | 1.348718763                                                                                                                                                                      | 1.499350357 | 0.934628001 | 1           | 0.779820788 |
| 0.513379459 | 0.840889556                                                                                                                                                                      | 0.939897066 | 0.362778749 | 1           | 0.743269723 |
| 0.459729831 | 0.771866503                                                                                                                                                                      | 0.42879473  | 0.44228884  | 0.61293679  |             |
| YOR222W     | YOR222W::ODC2 1                                                                                                                                                                  |             |             |             |             |
| 0.769530714 | 0.815665936                                                                                                                                                                      | 0.80317895  |             |             |             |
| 0.726217792 | 1                                                                                                                                                                                | 0.739103977 | 0.837581698 | 0.915109488 | 0.885725639 |
| 1.293614092 | 1.265067894                                                                                                                                                                      | 0.546940581 | 0.760750676 | 1           | 2.238462415 |
| 1.924105109 | 1.225417206                                                                                                                                                                      | 0.65510193  | 1           | 1.592459586 | 1.046340208 |
| 0.660503652 | 0.536644235                                                                                                                                                                      | 1           | 0.930540854 | 0.800510791 | 1.090898191 |
| 0.974144362 | 1                                                                                                                                                                                | 0.892052831 | 1.264606572 |             | 1           |
| 0.773351222 | 0.919396649                                                                                                                                                                      | 0.659139189 | 1.076406305 | 0.838677759 | 1.697834945 |
| YOR222W     | YOR222W::ODC2                                                                                                                                                                    |             |             |             |             |
| 0.960403825 | 0.898527373                                                                                                                                                                      | 0.980614013 |             |             |             |
| 1.009317057 | 1.009747142                                                                                                                                                                      | 0.824884868 | 0.861236968 |             |             |

|          |                                                                                      |             |             |             |             |             |             |  |  |
|----------|--------------------------------------------------------------------------------------|-------------|-------------|-------------|-------------|-------------|-------------|--|--|
|          | 0.76919323                                                                           | 0.962522498 | 0.962898385 |             |             |             |             |  |  |
|          |                                                                                      |             | 1           | 1.262412794 | 1.309630763 | 1.415599128 |             |  |  |
|          | 1.281114481                                                                          | 1.167186605 | 1           | 1.235321427 | 0.968998255 | 0.757900515 |             |  |  |
|          | 0.467825568                                                                          | 0.49915244  | 1           | 1.185245634 | 0.803596404 | 0.698430912 |             |  |  |
|          | 0.69882405                                                                           | 0.502987217 | 1.315187225 |             |             |             |             |  |  |
| YBL084C  | YBL084C::CDC27::Protein required for cell cycle                                      | 1           |             | 0.910469671 |             |             |             |  |  |
|          | 0.892972577                                                                          | 1.05109635  | 0.901520589 | 1           | 1.038775129 | 1.074579252 |             |  |  |
|          | 0.79249862                                                                           | 0.768200663 | 1           | 0.950859214 | 0.926783352 | 0.762871906 |             |  |  |
|          | 0.964914504                                                                          |             | 1.318824623 |             | 1.036097477 | 1           | 0.697399622 |  |  |
|          |                                                                                      | 1           | 0.997303291 | 1.071379931 | 1.205260588 | 0.994933063 |             |  |  |
|          | 1.187237991                                                                          | 1           | 1.071324746 | 0.82272408  | 0.829022722 | 0.842894976 |             |  |  |
|          | 0.944046259                                                                          | 1           | 1.00744994  | 0.656424044 | 0.966916185 | 0.867500519 |             |  |  |
|          | 0.780726492                                                                          | 0.922032049 |             |             |             |             |             |  |  |
| YOR224C  | "YOR224C::RPB8::16-kDa RNA polymerase subunit (common to polymerases I, II and III)" | 1           | 1.174928766 | 1.094801859 | 0.773683358 | 1.445391473 | 1           |  |  |
|          | 0.916776465                                                                          | 0.917745465 | 1.201431083 | 1.242605657 | 1           | 0.94439766  |             |  |  |
|          | 0.687933104                                                                          | 0.918136851 | 0.884216549 | 1           | 0.824362494 | 0.409559854 |             |  |  |
|          | 0.38965055                                                                           | 0.632657249 | 1           | 1.059559673 | 0.711361804 | 0.590129723 |             |  |  |
|          | 0.998578424                                                                          | 1           | 0.997773587 | 0.69179471  | 0.486133094 | 0.762280296 |             |  |  |
|          | 0.714994176                                                                          | 1           | 0.885359428 | 0.88157775  | 0.520318581 | 0.77285534  |             |  |  |
|          | 1.469445925                                                                          | 1           | 0.925561885 | 0.840523601 | 0.832015051 | 1.320242052 |             |  |  |
|          | 0.719166804                                                                          | 1.034987604 |             |             |             |             |             |  |  |
| YBL086C  | YBL086C::YBL086C::molecular_function unknown                                         | 1           |             | 1.275862577 |             |             |             |  |  |
|          | 1.225208255                                                                          | 1.270196965 | 1.407650431 | 1           | 1.25610811  | 1.302544951 |             |  |  |
|          | 1.22548274                                                                           | 1.201459732 | 1           | 1.267786675 | 1.369334552 | 1.348401954 |             |  |  |
|          | 1.069535621                                                                          | 1           | 1.016944398 | 0.938650629 | 0.804668313 | 1           |             |  |  |
|          | 1.236317917                                                                          | 1.059615929 |             | 1.239849302 | 1           | 1.227581771 | 1.226023156 |  |  |
|          | 1.218268468                                                                          | 0.817226804 | 1.243148245 | 1           | 0.861390534 | 1.085588899 |             |  |  |
|          | 1.182173512                                                                          | 0.890061615 | 1.427397593 | 1           | 0.755230348 | 0.725412785 |             |  |  |
|          | 0.626658455                                                                          | 0.787243463 | 0.818488979 | 1.318689781 |             |             |             |  |  |
| YBL100C  | YBL100C::YBL100C::molecular_function unknown                                         | 1           |             | 1.096061927 |             |             |             |  |  |
|          | 0.773676555                                                                          | 1.272656997 | 0.45957302  | 1           | 1.532457926 | 1.6967178   |             |  |  |
|          | 0.510514781                                                                          | 0.718838682 | 1           | 1.105260987 | 0.894710609 | 0.58791066  |             |  |  |
|          | 0.739667564                                                                          | 1           | 1.341422174 | 1.032179753 | 1.441313295 | 0.564996696 | 1           |  |  |
|          | 0.611979369                                                                          | 0.123937629 | 0.104353326 | 0.344633985 | 1           | 0.940401087 |             |  |  |
|          | 0.642409308                                                                          | 0.908719362 | 1.249751276 | 0.894444551 | 1           | 0.726858413 |             |  |  |
|          | 0.283616591                                                                          | 0.458801967 | 0.488276771 | 0.174064907 | 1           | 0.746246514 |             |  |  |
|          | 0.291942349                                                                          | 0.591743392 | 0.468587837 | 0.842600332 | 0.528876872 |             |             |  |  |
| YOR238W  | YOR238W::YOR238W::molecular_function unknown                                         | 1           |             | 0.843148571 |             |             |             |  |  |
|          | 0.993114967                                                                          | 0.832205817 | 0.96353561  | 1           | 0.905836152 | 0.822853118 |             |  |  |
|          | 1.134779646                                                                          | 1.246082454 | 1           | 0.773834955 | 0.863580122 | 1.027036164 |             |  |  |
|          | 1.129718481                                                                          | 1           | 0.71857455  | 0.726743009 | 0.601681394 | 0.905012945 | 1           |  |  |
|          | 0.822760419                                                                          | 1.079075888 |             | 0.86341472  | 1           | 0.961125651 | 0.98943052  |  |  |
|          | 0.825246186                                                                          | 0.935768248 | 1.020551518 | 1           | 1.010004097 | 1.232362016 |             |  |  |
|          | 1.438248897                                                                          | 1.533655351 | 1.484255142 | 1           | 1.010233162 | 1.097056298 |             |  |  |
|          | 1.167114887                                                                          | 1.146327614 | 1.091294784 | 1.31080911  |             |             |             |  |  |
| YBL101WA | YBL101WA                                                                             | 1           | 0.737500344 | 0.659437803 | 1.23615546  | 0.696314612 | 1           |  |  |
|          | 0.987487645                                                                          | 0.976343706 | 0.803117471 |             | 1           | 1.221481713 | 1.42293232  |  |  |
|          | 0.566833704                                                                          | 1.338853987 | 1           | 1.177504911 | 2.223672253 | 1.116558861 |             |  |  |
|          | 0.918055364                                                                          | 1           | 0.388570403 | 0.354261599 | 0.362208075 | 0.652255186 | 1           |  |  |
|          | 0.976123559                                                                          | 1.118799672 | 1.318899474 | 1.173103732 | 1.056415865 | 1           |             |  |  |
|          | 1.308633506                                                                          | 1.442547169 | 2.432640673 | 4.763294508 | 1.486446263 | 1           |             |  |  |
|          | 1.201007316                                                                          | 1.533477954 | 1.597042069 | 1.209783804 | 0.958025655 | 1.158450512 |             |  |  |
| YOR240W  | YOR240W                                                                              | 1           | 0.860872713 | 0.951156466 | 0.884526716 | 1.150176398 | 1           |  |  |
|          | 0.781047659                                                                          | 0.930248918 | 0.901309992 | 1.080621711 | 1           | 0.946130039 |             |  |  |
|          | 0.870077965                                                                          | 0.999165369 | 1           | 0.763687479 |             | 0.490061387 |             |  |  |
|          | 0.464001938                                                                          | 1           | 0.678433843 | 0.451109468 | 0.58650913  | 0.535817152 | 1           |  |  |

0.932187272 1.064702624 1.115681323 1.093190142 0.829345101 1  
1.054755242 1.01599586 1.252565463 1.185273057 0.750787554 1  
0.808054525 0.844673576 1.022732512 0.842765597 0.739417563 0.765295387  
YBL102W YBL102W::SFT2::similar to mammalian syntaxin 5 1 1.141527294  
1.142011008 1.006485946 1.206076504 1 1.035833657 0.9374384  
1.227016138 1.089596644 1 1.04647708 1.062876349 1.080954963  
0.909652097 1 1.050803653 0.710556285 0.696303153 0.764407701 1  
1.390357914 1.073517263 1.005102201 0.846755074 1 1.047088936  
1.069249946 1.142604686 1.205630392 0.991718716 1 0.978067223  
1.137952705 1.021923826 0.767236524 0.853375837 1 1.057186345  
0.888362701 1.040201838 0.97892874 1.133933042  
YOR242C YOR242C::SSP2::Sporulation SPCific 1 1.296213679 1.364118187  
1.229599252 1.519424957 1 1.076495415 1.151612762 1.590879703  
1.496489518 1 1.063388698 1.200764791 1.655762956 1.18381089 1  
0.950074789 0.821132254 1.442554857 0.928737263 1 1.053039884  
1.44301581 1.032423952 0.827693087 1 0.791497416 0.562382479  
0.524203394 0.740880957 0.852817096 1 0.722201513 0.91272278  
0.892494473 0.703268987 1.021154694 1 0.753270793 1.031130682  
1.029645517 1.114153939 1.236178891 1.196102433  
YBL104C YBL104C::YBL104C::not yet annotated 1 1.447601497 1.31669591  
1.363971436 1.140781721 1 1.324341065 1.456868406 1.308169664  
1.215258123 1 1.223226763 1.178956894 1.143113618 1.24509261 1  
1.340356444 1.182439536 0.881979699 1 0.635940647 0.520040285  
1 1.211310894 0.987213958 1.101535104 1.181295508 1  
0.979438969 1.290356974 0.939089227 1.015509687 1 0.852451518  
0.877491935 1.21466248 0.885294209 0.943047067  
YOR244W YOR244W::ESA1::contains amino-terminal chromodomains; Essential SAS  
family Acetyltransferase sharing homology with acetyltransferases from many  
different organisms 1 0.668078408 0.7274084 0.850517529 0.721119535 1  
0.669396585 0.694036427 0.805366622 0.786096594 1 0.675894619  
0.773677776 0.870740242 1 1.046307196 0.874551346 0.95563845  
1.112712204 1 1.464521623 2.271422651 3.116523558 1.504865717 1  
0.853581446 0.9496307 0.827341461 0.724227985 1.098280846 1  
0.902831219 1.083601749 0.960438852 1.099867935 1.084472305 1  
1.220228313 1.231366884 1.297485829 1.181528156 1.301248388 1.160201842  
YOR246C YOR246C::YOR246C::molecular\_function unknown 1 0.977115827  
0.722777495 0.888363178 0.511892699 1 0.892955164 0.884995761  
1.007294971 1 0.942277268 0.8032207 0.721146124 1.126006095 1  
1.080657979 0.521598409 0.779015835 0.583947409 1 0.833712523  
0.330916705 0.262266687 0.600798094 1 0.824974487 0.773965634  
0.8604252 1.1728203 1.07906852 1 0.738218143 0.551654463  
0.548805825 0.692135904 0.426624417 1 0.732354278 0.487986714  
0.68354191 0.550289928 0.613917388 0.783683463  
YOR248W YOR248W::TOS11::molecular\_function unknown 1 1.771771046  
1.450890459 0.778491966 1.01859552 1 1.128401491 1.257126357  
0.92103037 0.965512823 1 1.426584312 1.08414018 1.471975163  
0.73145323 1 0.997946169 0.718409741 0.846991607 0.964822578 1  
0.461725745 0.874306785 0.466758282 0.37915038 1 1.10132145  
0.606041771 0.549869053 0.832313701 0.416203119 1 0.585275446  
1.075114402 0.677656745 0.557300528 0.723916554 1 0.983802431  
1.650395592 1.221491603 1.262499125 1.464190662 1.020977592  
YOR262W YOR262W::YOR262W::molecular\_function unknown 1 0.936742157  
0.733244294 0.753525215 0.759090393 1 0.599299432 0.833743005  
0.920497716 1 0.831081541 0.636368805 0.62431005 0.931593895 1  
0.755951682 0.419008797 0.544591117 1.004808563 1 1.051427405  
1.049433106 0.930454543 1.143826973 1 0.950450401 0.877863278  
0.84406388 0.84060048 0.833798521 1 0.949215709 1.106036903

0.804792182 0.793695194 1.065916957 1 0.909781365 0.979262028  
 0.893453582 0.883414451 0.656858415 1.072639421  
 YIL092W YIL092W::YIL092W::molecular\_function unknown 1 1.301263349  
 1.110408156 1.208421165 1.384400871 1 1.279535942 1.14560412  
 1.025205852 1.3515314 1 1.002635011 0.819741317 1.353636719 1  
 1 0.664245693  
 0.668126441 0.677870625 0.880012475 1 0.731690942 0.820409314  
 0.733960352 1.095223951 1 0.703949545 0.897899952 0.905182888  
 1.041668005 0.919155396 0.892260903  
 YIL094C "YIL094C::LYS12::homo-isocitrate dehydrogenase, an NAD-linked  
 mitochondrial enzyme required for the fourth step in the biosynthesis of lysine,  
 in which homo-isocitrate is oxidatively decarboxylated to alpha-ketoadipate." 1  
 1.19625114 1.020345081 1.071632821 1.055123969 1 1.172298722  
 0.974491075 1.071038566 1.032772113 1 1.09341379 1.055424829  
 0.62589508 1.110905231 1 1.199014887 2.189627705 3.034374565  
 1.918596879 1 1.276150122 1.149335633 3.463009943 2.387258627 1  
 0.972011122 0.865741018 0.865221867 1.186022436 1.036172443 1  
 0.991585193 0.989302368 0.631753554 0.678553385 1.23330361 1  
 1.167061192 1.203377546 1.313354042 1.217959763 1.401873981  
 YIL096C YIL096C::YIL096C::molecular\_function unknown 1 1.062020081  
 1.011565204 1.043238489 1.313128308 1 0.888524645 0.752010426  
 1.360727107 1.136614806 1 0.659542308 0.545493332 0.749077788  
 1.263870794 0.567736773 0.697276633  
 0.318530276 1 0.854936653 0.614641332 0.565148734 0.811522899  
 0.980109084 1 1.000474239 0.932169032 1.493094308 2.671578595 1  
 0.831220288 0.822679915 1.100159958 1.822478861 0.793938227 0.889634012  
 YIL098C YIL098C::FMC1::Formation of Mitochondrial Complexes  
 0.600868063 1.021519763 0.764811881 1.189447368 0.674375473  
 0.810605889 1.195131973 1.146099065 0.645013152 0.983676818  
 1.452527574 0.809623924 0.620787568 0.455108246 0.766041517 1  
 3.061604537 2.40397761 1 0.985475212 1.249052823  
 0.864938515 0.736783712 0.996159245 1.083536586 1.159825789  
 0.814132559 0.824872143 1.638389186 1 1.530691588 1.429843204  
 1.646333875 1.126052476  
 YIL100W YIL100W::YIL100W::molecular\_function unknown 0.928390408  
 0.963841839 0.882620679 0.968772956 1.086483591 0.961484204  
 0.965711231 1.190989391 1.097283486 0.862489292 1  
 0.875429221 0.808962123 1  
 0.952437813 0.875045319 1.027248662 1 1.116031346 1.012501529  
 0.843287901 1.446278038 1 1.147789511 1.412288981  
 0.833499347 1.082271213  
 YOR264W YOR264W::DSE3::Daughter Specific Expression 3 1 0.978683821  
 1.035612167 0.874525355 1.029201284 1 0.886492972 0.81821069  
 1.066125307 0.97755805 1 0.960652406 1.043655393 1.230814504  
 0.92093358 1 0.985255579 0.667336968 0.814725985 0.986180124 1  
 1.389865647 1.778737758 1.4360641 0.978072271 1 0.968509004  
 0.853132997 0.826261455 0.798570442 0.869406857 1 0.839132021  
 1.26115449 0.843251699 0.542727307 1.18399426 1 0.879158189  
 1.34000401 0.889117179 1.344475574 1.046440933 1.424640225  
 YOR266W YOR266W::PNT1::Involved in targeting of proteins to the  
 mitochondrial inner membrane; Pentamidine resistance protein 1  
 1.041636374 1.007975914 1.324290925 1.2304418 1 1.15941634  
 1.109985815 1.038546452 1.160845242 1 1.044910877 0.930105768  
 1.045066113 1.257510222 1 1.312063411 0.953702687 1  
 1.103252351 1.163380986 1.394169267 1 0.830225646 0.981563012  
 0.98996662 0.902036515 1.203950482 1 1.022875964 1.254453103

1.359994451 1.208211106 1 1.118005063 0.848915976 0.944608342  
0.518742185 0.974019643 1.373854061  
YIL114C YIL114C::POR2::Mitochondrial porin 1.056444222 0.950913006  
0.942597072 0.820376022 0.9286284 0.817196227 0.927485984  
0.980069577 0.88855077 0.940310411 0.944201361 0.809623924 1  
1.411291427 1.331715645 1.169591158 1 1.3571102 1.030711582  
0.821126088 1 1.223162304 1.376470633 1.556271236 1.222241297  
0.936314269 1 1.071931545 1.124698685 0.898100776 0.663759947  
0.796788137 1 1.433255367 1.37801928 0.978688253  
0.750409762  
YIL116W YIL116W::HIS5::responsive to control of general amino acid  
biosynthesis 1 1.097062247 0.873006869 0.782327176 1  
1.073801709 0.987613519 0.738345594 0.715738796 1 1.878933929  
2.424582497 0.669073484 0.578514292 1 3.327822022 2.505234626  
1.245858225 1.084999178 1 1.387593465 1  
1.03100347 1.412515617 0.858734845 0.976617743 1.063256366 1  
1.177938235 1.43166132 1.081504596 1.104708286 2.549408665 1  
1.767876583 1.820082944 1.352462754 1.868172378 2.735889562 0.961435195  
YOR268C YOR268C::YOR268C::molecular\_function unknown 1  
1.351031575 1.146051786 1 1.034925009 1.276575487 1.244408123  
1.230902625 1 0.923006057 0.98957174 1.501849832 1.19800854  
0.421614356 0.800899288 0.714401557 0.506110033 1 0.741309519  
1.113779785 1 0.943257806 0.934114413 1.124642506 1.035095364 1  
0.915784685 0.82920006 1.00123012 0.905798475 0.877508779 1  
0.720554701 0.855202358 0.563458084 0.81025558 0.73902664  
YIL118W YIL118W::RHO3::ras homolog--GTP binding protein 0.918540092  
1.045434904 0.786056648 1.164973166 0.846298873 0.706259633  
0.910261229 0.911457771 0.709728111 0.839972543  
0.85642118 0.745412052 1.180839258 1  
1.083114082 1.142445396 0.826759616 0.820122819 0.911134115 1  
0.920801237 1.050479408 0.842228367 0.79112146 1.303093856 1  
1.125383131 1.068111748 1.001725118 1.482505791 1.382035543 1.272281628  
YOR270C YOR270C::VPH1::vacuolar ATPase V0 domain subunit a (100 kDa) 1  
0.971793081 0.640172594 0.928238191 0.647673648 1 1.178447148  
0.952890427 0.49436694 0.849436903 1 1.031478137 0.774374906  
0.492053152 0.930790964 1 0.839621769 0.612700238 0.377327867 1  
1.202089575 0.461658069 0.385425155 0.728611326 1 0.982411357  
0.912960296 1.179795031 1.261268056 1.050273978 1 0.874743156  
0.63581669 0.955770848 0.760528839 0.425182016 1 0.881350343  
0.791168394 0.977212216 0.713605844 0.806907861 0.717136061  
YIL120W YIL120W::QDR1::Quinidine Resistance 1 1.45822607 1.269194511  
1.541620311 1.360455772 1 1.389120935 1.397071336 1.229952817  
1.306232803 1 1.432794577 1.438030748 1.44634241 1.249232193 1  
1.839323512 1.320361783 1.215367826 1  
0.995229297 1.107145113 1.179896285 1.014380566 1.005304335 1  
0.951950556 1.332160919 1.295507365 1.194224249 1.668089712 1  
1.330228812 1.148109844 1.043209893 1.154350382 0.968440097  
YOR272W YOR272W::YTM1::microtubule-associated protein 1 0.651089297  
0.42342638 0.581077923 0.576408979 1 0.46547248 0.648813116  
0.91473176 1 0.39594908 0.237436576 0.583489794 0.576420755 1  
0.198993484 0.227094964 0.116089646 0.466185428 1 0.209405136  
0.20665557 0.908237 1 0.908196184 0.621272693 0.850734434  
1.109578084 0.970475391 1 0.870008766 0.642267222 0.637853889  
0.919213469 0.79375673 1 0.631777236 0.474678126 0.834617349  
0.824460454 0.402590692 0.647961768  
YIL122W YIL122W::POG1::Promoter of Growth; weak similarity to human  
transcription adaptor protein p300 1 1.101636526 1.210038591 1.157031456

|             |                                                                                |             |             |             |
|-------------|--------------------------------------------------------------------------------|-------------|-------------|-------------|
| 1.12790498  | 1                                                                              | 1.248852111 | 1           | 0.891548973 |
| 0.946342877 |                                                                                | 1.208229578 |             |             |
|             | 1                                                                              | 0.705980177 | 0.899793525 | 0.805961261 |
| 0.800359977 | 1                                                                              | 0.799055479 | 0.798998684 | 1.430517255 |
| 0.888956712 |                                                                                | 0.996051534 | 0.907289757 | 0.885255897 |
| YOR286W     | YOR286W::YOR286W::molecular_function                                           | unknown     | 1           | 0.974814398 |
| 1.120429384 | 0.893399129                                                                    | 1.814410531 | 1           | 1.110195785 |
| 1.476000273 | 1                                                                              | 0.966232864 | 0.869556523 | 1.198015551 |
| 0.891835644 | 1.665065373                                                                    | 0.733904006 | 1.340182758 | 1           |
| 1.884828559 | 2.168592605                                                                    | 1.842939893 | 1           | 1.206923482 |
| 0.881209236 | 0.771558627                                                                    | 0.798446316 | 1           | 1.188727923 |
| 1.525371687 | 1.019645024                                                                    | 2.010807998 | 1           | 1.22114766  |
| 0.873927989 | 1.51112543                                                                     | 1.640919335 |             | 1.732738399 |
| YOR288C     | YOR288C::MPD1::Disulfide isomerase related protein                             |             | 1           |             |
| 0.973316973 | 0.951662636                                                                    | 1.045504307 | 1.15084449  | 1           |
| 1.255359885 | 1                                                                              | 0.923084404 | 0.855223231 | 0.695441878 |
| 0.797145584 |                                                                                | 0.759782045 | 0.917386972 | 1           |
| 2.071731165 | 1                                                                              | 1.058993987 | 1.265452685 | 1.442218433 |
| 1.056670277 | 1                                                                              | 0.892925311 | 1.179885337 | 1.524772865 |
| 0.829707178 | 1                                                                              | 1.283548439 | 1.002999884 | 1.155484144 |
| 1.376816852 | 0.985077                                                                       |             |             | 0.91029073  |
| YOR290C     | YOR290C::SNF2::involved in the coordinate regulation of phospholipid synthesis |             | 1           |             |
| 0.918450967 | 0.877402839                                                                    | 0.757912216 | 0.872088518 | 1           |
| 1.061171126 | 0.97785548                                                                     | 1.212966895 | 1           | 1.053274654 |
| 1.005377182 |                                                                                | 0.831215222 | 0.524444724 | 0.563367034 |
| 1.281463023 | 1.241756893                                                                    | 1.232013748 | 1.287110212 | 1.140625354 |
| 0.908376454 |                                                                                | 1           | 0.655716364 | 0.865258823 |
| 0.574704906 | 0.891892594                                                                    |             |             | 0.897451162 |
| YOR292C     | YOR292C::YOR292C::molecular_function                                           | unknown     |             | 0.640269217 |
| 0.66848618  | 0.527764915                                                                    | 0.528643281 | 0.546038334 | 0.579945693 |
| 0.473017851 | 0.501805531                                                                    | 2.329281073 | 3.348731905 | 4.459247838 |
| 2.007906555 | 1                                                                              | 2.47872094  | 2.510798917 | 3.141210413 |
| 0.637155913 | 1.216854511                                                                    | 0.743932547 | 1           | 1.169987645 |
| 1.276098312 | 1.50906137                                                                     | 1.166309576 | 1           | 1.040414107 |
| 1.34755657  | 1.198920186                                                                    | 0.850964695 | 1           | 0.9344412   |
| 1.154831268 | 0.904753864                                                                    | 0.944055546 | 1.229376134 | 1.100676899 |
| YOR294W     | YOR294W::RRS1::Regulator for ribosome synthesis                                |             |             | 0.933315566 |
| 0.994188143 | 0.921352305                                                                    | 1.124835429 | 0.783341034 |             |
| 1.333191945 |                                                                                | 0.853587461 | 0.472799496 | 0.79696199  |
| 0.328658238 | 0.494323646                                                                    | 0.257719441 | 0.47289888  | 1           |
| 0.520483869 |                                                                                | 0.446324319 | 1           | 0.776653804 |
| 0.834367584 | 0.860641133                                                                    | 1           | 0.765873047 | 0.868698419 |
| 1.157606299 | 1.347653883                                                                    | 1           | 0.454580432 | 0.666953345 |
| 0.795082419 | 0.348925789                                                                    | 1.025355707 |             | 0.814303347 |
| YMR075CA    | YMR075CA::YMR075C-A::molecular_function                                        | unknown     |             | 0.804030407 |
| 0.973689412 |                                                                                | 1.111129806 | 0.652438888 | 1.151055179 |
| 0.693238386 | 0.78799917                                                                     | 1.284254007 | 1.188492633 | 1           |
| 0.626247986 | 1.394742447                                                                    | 1           | 1.091531695 | 2.054539448 |
| 0.895752838 | 1                                                                              | 0.643089392 | 0.624770046 | 0.563872044 |
| 0.861376758 | 1                                                                              | 0.769911083 | 1.30147047  | 1.034544019 |
| 1.674734837 | 1                                                                              | 1.048067388 | 1.702509244 | 1.292498588 |
| 1.393062579 | 1.640043775                                                                    |             |             | 0.830782456 |
| YMR050C     | YMR050C                                                                        | 1           | 1.047747087 | 0.754067786 |
| 1.154108143 | 1.082767752                                                                    | 0.831743024 | 0.739761159 | 1           |
| 1.420406802 | 0.688998966                                                                    | 1.271892095 | 1           | 0.989960683 |
| 1.025185149 | 0.716183823                                                                    | 1           | 0.359093288 | 0.278371694 |

|             |                                                                                                      |             |             |             |             |             |             |
|-------------|------------------------------------------------------------------------------------------------------|-------------|-------------|-------------|-------------|-------------|-------------|
| 0.756286643 | 1                                                                                                    | 0.931228478 | 0.759624078 | 1.693852835 | 1.305282421 |             |             |
| 0.793166834 | 1                                                                                                    | 1.016260005 | 1.204980039 | 2.549829961 | 4.205875678 |             |             |
| 1.742988577 | 1                                                                                                    | 0.903826924 | 1.558123068 | 2.806562437 | 0.981296332 |             |             |
| 1.018333325 | 0.671603625                                                                                          |             |             |             |             |             |             |
| YAL043CA    | YAL043CA::KRE23::molecular_function                                                                  | unknown     |             | 1           | 1.169595153 |             |             |
| 0.977321017 | 1.048090795                                                                                          | 0.506541341 | 1           | 1.265774015 | 1.465354141 |             |             |
| 0.834866445 | 1                                                                                                    | 1.412910341 | 1.310018092 | 0.883275449 | 0.951674483 | 1           |             |
| 0.436927499 | 0.344358356                                                                                          | 0.402930602 |             | 1           | 1.149355002 | 0.859937859 |             |
| 0.522986322 |                                                                                                      |             |             |             |             | 0.626768373 |             |
| 1.341225488 | 0.682662173                                                                                          |             |             |             |             | 0.705752939 |             |
| YML024W     | YML024W::RPS17A::Homology to rat S17                                                                 |             |             | 1           | 1.121616584 |             |             |
| 1.208961234 | 0.90710826                                                                                           | 1.685971801 | 1           | 1.091663415 | 0.873253009 |             |             |
| 1.346701916 | 1.290929962                                                                                          | 1           | 0.72378088  | 0.870342908 | 0.771952665 |             |             |
| 0.990500372 | 1                                                                                                    | 0.850613364 | 0.391661654 | 0.27998288  | 0.704718876 | 1           |             |
| 1.288939115 | 0.85730954                                                                                           | 0.532089714 | 0.625992283 | 1           | 1.427858066 |             |             |
| 1.856781337 | 0.756006111                                                                                          | 1.242052606 | 1.085467522 | 1           | 1.601047997 |             |             |
| 2.227326603 | 1.267677346                                                                                          | 0.86888645  | 1.750706497 | 1           | 0.92092908  |             |             |
| 1.271730124 | 0.685770507                                                                                          | 1.813970665 | 0.946330194 | 1.196977994 |             |             |             |
| YML026C     | YML026C::RPS18B::Homology to rat S18 and E. coli S13                                                 |             |             | 1           |             |             |             |
| 1.168718996 | 1.183095889                                                                                          | 0.897557866 | 1.638366603 | 1           | 1.018613225 |             |             |
| 0.907881771 | 1.113231705                                                                                          | 1.171844381 | 1           | 0.870595434 | 0.892283371 |             |             |
| 0.627565262 | 0.84476501                                                                                           | 1           | 0.830942521 | 0.456095622 | 0.219668523 |             |             |
| 0.681052971 | 1                                                                                                    | 1.214335635 | 0.736800038 | 0.506752132 | 0.788174337 | 1           |             |
| 1.343640078 | 1.236256337                                                                                          | 0.818149322 | 1.22984928  | 1.429636438 | 1           |             |             |
| 1.384636298 | 1.330069782                                                                                          | 1.098258992 | 0.800869037 | 1.493598833 | 1           |             |             |
| 1.506523692 | 1.639427376                                                                                          | 1.025219688 | 1.986936621 | 1.084422046 | 1.194351103 |             |             |
| YMR225C     | YMR225C::MRPL44::Mitochondrial ribosomal protein MRPL44 (YmL44)                                      |             |             |             |             | 1           |             |
| 0.936643151 | 1.53719708                                                                                           | 1.136766749 | 1.83796351  | 1           | 0.972940126 |             |             |
| 1.141802653 | 1.604707808                                                                                          | 1.553757477 | 1           | 1.191231133 | 1.530565624 |             |             |
| 1.398448692 | 1                                                                                                    | 1.113843552 | 0.865125727 | 0.748750967 | 1.299502143 | 1           |             |
| 1.375103736 | 2.215372755                                                                                          | 1.90010672  | 0.734392436 | 1           | 0.923264393 |             |             |
| 1.246844277 | 0.75337404                                                                                           | 0.801895025 | 0.811599012 | 1           | 1.219188006 |             |             |
| 1.602969421 | 1.718849399                                                                                          | 3.176530445 | 1.545082005 | 1           | 1.295590972 |             |             |
| 2.034370538 | 1.595526654                                                                                          | 2.393207406 | 1.490220772 | 1.090151884 |             |             |             |
| YIL124W     | YIL124W::AYR1::Subcellular location of Ayr1p: lipid particles and endoplasmic reticulum of the yeast |             |             | 1           | 1.56128804  | 1.367931463 | 1.749287929 |
| 1.742916233 | 1                                                                                                    | 1.543517456 | 1.537685298 | 1.779989283 | 1.636917632 | 1           |             |
| 1.187885594 | 1.48800587                                                                                           | 1.842184376 | 1.34034506  | 1           | 1.533201546 |             |             |
| 1.226811065 | 1.644500951                                                                                          | 1.937020795 | 1           | 1.620401718 | 1.497919991 |             |             |
| 2.522578694 | 2.222649265                                                                                          | 1           | 0.990150668 | 1.354263371 | 1.33723054  |             |             |
| 1.023086086 | 1.024935416                                                                                          | 1           | 1.081903122 | 1.47911099  | 1.342959544 |             |             |
| 0.953712356 | 1.41314573                                                                                           | 1           | 1.355782405 | 1.333123855 | 1.034712481 |             |             |
| 1.434999377 | 1.947101782                                                                                          | 1.168082408 |             |             |             |             |             |
| YIL138C     | YIL138C::TPM2::Tropomyosin isoform 2                                                                 |             |             | 1           | 0.774382643 |             |             |
| 0.880408225 | 0.847116708                                                                                          | 1.175502931 | 1           | 0.738023359 | 0.886344244 |             |             |
| 1.149693295 | 1                                                                                                    | 0.843404732 | 0.929262271 | 0.927150144 | 0.929244069 | 1           |             |
| 0.874102822 | 0.755737442                                                                                          | 0.766327041 | 0.897490538 | 1           |             |             |             |
| 1.238594057 | 1                                                                                                    | 0.869510542 | 1.08653734  | 1.19269419  | 0.997289704 |             |             |
| 1.326440347 | 1                                                                                                    | 1.028926686 | 1.436990767 | 1.362150514 | 1.417636039 |             |             |
| 1.342797819 | 1                                                                                                    | 1.452931907 | 1.08230323  | 1.15029121  | 1.091923479 |             |             |
| 1.706591177 |                                                                                                      |             |             |             |             |             |             |
| YIL140W     | YIL140W::AXL2::involved in polarity establishment/cellular polarization during budding               |             |             | 1           | 1.233507518 | 1.05386796  | 1.679554737 |
| 1.160475473 | 1                                                                                                    | 1.381495648 | 1.541590772 | 0.942056827 | 0.93590728  | 1           |             |
| 1.277630214 | 0.788527459                                                                                          | 0.58173685  | 1.377640334 |             |             |             |             |
| 1.427727286 | 1.049353153                                                                                          |             |             |             | 1           | 0.699066034 |             |
| 0.622599242 | 0.890174102                                                                                          | 0.870730354 | 0.619947873 | 1           | 0.766381316 |             |             |

0.860410357 0.936708351 0.837959243 0.578774996 1 0.891389575  
 0.877041737 0.961048512 0.861381033 1.028028153 0.62957364  
 YIL142W YIL142W::CCT2::cytoplasmic chaperonin of the Cct ring complex  
 related to Tcp1p; subunit beta 1 1.052685888 0.855966624 1.245409124  
 0.957010296 1 1.1107146 1.174759093 0.962794954 1.126827542 1  
 0.815841055 0.895886156 0.666041759 1.015941062 1 1.07735078  
 1.088740732 0.877828834 0.713294405 1 0.7422593  
 0.952640957 1 0.938501936 0.995770851 1.1077722 0.928524225  
 0.857362542 1 1.143172157 1.103305998 0.772605768 0.709270488  
 0.668989833 1 1.158175982 1.132020873 1.051065274 0.885243957  
 0.785809098 0.980698884  
 YOR296W YOR296W::YOR296W::molecular\_function unknown 1 0.992712066  
 1.050821837 1.106014668 0.96034478 1 1.059027826 1.186357086  
 1.176565543 1.025539653 1 1.185159662 1.077585282 0.772581944  
 1.10341875 1 0.90741095 0.711754973 0.746633657 1  
 1.065332989 0.76705639 0.990214021 0.609279933 1 1.060855401  
 0.935013343 1.059834447 1.079354765 1.035458783 1 1.0417497  
 1.022608285 0.964306869 1.054948738 0.832338324 1 0.759950076  
 1.006899601 1.049788798 0.674637588 0.800099385 0.820459668  
 YIL144W YIL144W::TID3::Product of gene unknown 1 0.952969209  
 1.083852591 1.258106 1.186402699 1 0.96724265 1.026318218  
 1.041282847 0.866286392 1 0.839017808 1.020424448 0.872758014  
 1.130183113 0.959958721  
 0.358754234 1 0.714783821 0.880243134 0.680415982 0.588266197  
 0.947471391 1 0.940896016 1.022422948 0.87836651 1.205477204  
 1.256087363 1 1.346337079 1.507058765 1.287238113 1.759896415  
 0.929037055  
 YIL146C YIL146C::ECM37::ExtraCellular Mutant 1 1.267701194  
 0.914308486 1.336767427 0.943853493 1 1.249364045 1.24510753  
 1.062221622 1.041096544 1 1.129980198 1.022249039 0.985989184  
 1.070866571 1 1.42639121 1.056014379  
 1 1.19909168 0.969805751 1.471356287 1.09443071 0.950730499 1  
 0.847658239 0.880214807 0.72585105 0.729566221 0.699494027 1  
 0.940959484 0.858832142 0.968569417 0.903294348 0.937636066 0.875624  
 YOR310C YOR310C::NOP58::part of small (ribosomal) subunit (SSU) processosome  
 (contains U3 snoRNA); 57 kDa nucleolar protein involved in the pre-rRNA  
 processing steps that lead to formation of 18 S rRNA; interacts with Nop1p 1  
 0.884575222 0.606803583 0.899185217 1 0.801718813 0.687176036  
 0.649182369 0.815231332 1 0.539009557 0.3048442 0.24807601  
 0.877430219 1 0.38466238 0.223821065 0.227653507 0.319753393 1  
 0.44984843 0.181427453 0.133185391 0.376165879 1 0.810722311  
 0.601256155 0.791674967 1.024930119 0.982270193 1 0.740603766  
 0.463382317 0.352606454 0.555529212 0.454093063 1 0.745380061  
 0.438283623 0.678081879 0.776348826 0.380675595 0.621693021  
 YIL148W YIL148W::RPL40A::Homology to rat L40 1 1.235451366  
 1.442658082 0.973916105 1.77147323 1 1.07859594 1.014859644  
 1.439957301 1.376066805 1 0.841051393 1.002489111 0.991535806  
 0.856596755 1 0.771674791 0.39124537 0.24847184 0.669940449 1  
 1.439575282 1.423829248 0.754376502 0.766280535 1 0.881845168  
 0.74505415 0.518796151 0.744412411 0.926362811 1 1.314454568  
 1.938876518 0.906311779 0.924996494 2.177208796 1 1.239374562  
 1.754662766 1.09460681 2.272101452 1.344824655 1.239007927  
 YOR312C YOR312C::RPL20B::Homology to rat L18a 1 1.314114137  
 1.386088929 0.952941281 1.821742656 1 1.140708732 1.009095809  
 1.51252761 1.516128129 1 0.956801763 0.843549917 0.960887362  
 0.946611108 1 0.480361948 0.189861955 0.130796456 0.321371501 1  
 1.27528087 0.499363556 0.765480391 1 1.218952659 0.904959648



0.758694953 0.932721838 1.198605171 1 1.107985938 1.494669339  
 0.883547185 0.716705971 1.279296438 1 1.266295654 1.714363476  
 0.879186738 1.966923444 1.005826839 1.215366122  
 YIL162W YIL162W::SUC2::invertase (sucrose hydrolyzing enzyme) 1  
 1.221496541 0.944660399 1.074786798 0.748964546 1 1.373009948  
 1.266126128 0.70796826 0.697920792 1 1.189288167 1.034485965  
 0.678972261 0.683135441 1 2.108034872 1.597772895 1.69993481  
 1.71092056 1 0.809989462 0.492998299 1 1.32769483  
 1.252943914 1.385884656 1.570136494 0.930422805 1 0.805999843  
 0.744007353 0.708042289 0.7711176 0.622503426 1 1.461395224  
 0.997692152 1.081257687 0.818623773 1.113245587 0.732021686  
 YOR314W YOR314W::YOR314W::molecular\_function unknown 1 1.223391826  
 1.367376649 1.743954012 1 1.602811139 1.339800442 1  
 1.225645572 1.066684451 1.380949214 1.517376997  
 0.704718399 0.428330789 1 1.081200701  
 0.965011635 0.986639681 1.363144393 1.115941389 1 0.96727179  
 0.701164477 0.729244577 1.075362464 1 0.713085737 0.553878069  
 0.683513 0.637570812 0.843862847 1.705715512  
 YIL164C YIL164C::NIT1::nitrilase 1.051519064 1.05568427  
 0.969432564 0.882051091 1.006114932 0.928132821 1.010959755  
 1.065562378 1.339457082 1.157142379 1.099620588 0.852699411 1  
 1.300745723 0.896666432 1.028039695 1.18321825 1 1.499880726  
 1.722911858 1.319135122 1 0.928779382 0.91297669 0.874915817  
 0.778546702 0.997176147 1 1.136877086 1.146078626 0.93146991  
 0.997340358 1.31852469 1 1.211959507 1.165624542 1.455793875  
 1.366599595 1.119047469  
 YOR316C YOR316C::COT1::Protein involved in cobalt accumulation; dosage  
 dependent suppressor of cobalt toxicity 1 0.79868163 0.775731042  
 0.807330223 0.781932486 1 0.782317565 0.869985097 0.680494844  
 0.767545311 1 1.430390003 1.373070747 0.899269249 0.742769433 1  
 1.853693851 1.238973576 1.136735162 0.986840858 1 2.067225877  
 1.215633332 1.326939804 1.497194324 1 1.73670413 2.249332672  
 2.663939386 1.013461875 1.417344079 1 1.828080564 2.178172722  
 2.361773609 1.478692754 0.510663496 1 1.856529519 1.995521963  
 1.353038699 0.898920629 0.778742585 1.093654335  
 YIL166C YIL166C::YIL166C::molecular\_function unknown 1 1.361795947  
 1.309075697 1.509732919 1.791732083 1 1.464806906 1.638751829  
 1.422647426 1.372094242 1 1.600782863 1.530575263 1.42363773  
 1.407033125 1.35419182 1.175965316 1  
 1.445552384 1 0.939706221 1.199765186 1.033188042  
 1.183901316 1 0.904271577 1.076766203 0.776230684 0.833167801  
 0.8392745 1 1.199179899 1.101619338 1.037567167 1.302512953  
 1.315139353 1.659307463  
 YOR318C YOR318C::YOR318C::molecular\_function unknown 1 1.955304449  
 1.895968473 1.892237463 1.889542921 1 1.776401199 1.597460424  
 1.498363799 1 1.530768879 1.418433015 1.537154459 1.359424127  
 1 1.165777418  
 0.969521695 0.877614058 1.047950811 1.114204098 1 1.20002972  
 1.043951717 0.947130301 1.467851175 0.882695418 1 1.202587857  
 1.177312878 0.822528027 1.212973811 0.947698833 1.787148487  
 YOR320C YOR320C::GNT1::GlcNAc transferase 1 0.842410295 0.773309448  
 0.907306391 0.858758835 1 0.899699951 0.978519679 0.964230295  
 0.841355258 1 0.772338858 0.861885775 0.566935238 1.118834373 1  
 1.394670568 0.820311139 0.736867874 1.662531136 1 1.268907535  
 0.882740954 0.652967292 0.985268242 1 1.074740093 1.174539274  
 1.416152328 1.16894262 1.222306502 1 1.075525869 1.23428701

0.942831465 0.988087915 0.933115301 1 1.089058705 1.020128173  
 1.156565664 1.256649218 0.837422542 1.068261305  
 YOR334W "YOR334W::MRS2::mitochondrial magnesium ion transporter similar to  
 bacterial CorA, essential for splicing of group II introns" 1 1.129155767  
 1.048332774 1.436600222 1.402475638 1 1.177934736 1.487903456  
 1.241290865 1.284773182 1 1.025653105 0.89981912 1.104275953  
 1.213377103 1 1.262897976 1.101557597 1.52976834 1  
 0.843996127 1.189765695 0.865853663 1 0.88877518 0.760886282  
 0.614747374 1.140881887 0.933521294 1 0.977141856 0.74503042  
 0.680109919 0.944546718 1.137480626 1 0.851500156 0.76597476  
 0.982168465 0.972849985 1.332235041 0.795066585  
 YOR336W "YOR336W::KRE5::appears to function early in (1,6)-beta-D-glucan  
 synthesis pathway" 1 1.287175065 1.05474915 1.345771352 1.002083444 1  
 1.267070685 1.31442982 1.037321859 0.967188253 1 1.250681763  
 1.294864146 0.819762684 1.214195349 1 1.002596535 0.982628946  
 1.196147235 1.017750396 1 0.938148428 1.037303403 0.580772581  
 0.708462688 1 0.965041857 0.909455773 1.230824162 1.249731617  
 0.87680338 1 0.942741989 0.827013419 0.979434866 1.201907027  
 0.623424235 1 0.934636455 0.967155092 1.341373352 1.064643756  
 0.975829962 3.082196463  
 YOR338W YOR338W::YOR338W::molecular\_function unknown 1  
 1 1 1  
 0.431777174 1.149519837 1.138299635 1 0.697528386  
 1 0.74431378 0.631629576 0.917570528 0.822028492 0.767498134 1  
 2.227913702 1 0.923248901 1.055497219 1.438189054  
 0.918495645 1.679446817  
 YIL168W YIL168W::SDL1::L-serine dehydratase 1 1.186079685 1.34758338  
 0.946782691 1 1.315191023 1 3.110858383  
 3.029585258 1.700737077 1 1.85369582 1.300375309 1.105895767  
 1.647904931 1 4.641766165 4.003174589 2.834139945 2.481338359  
 0.892466108 1.195600922 0.8941385 0.668023405 0.63919048 1  
 3.255401264 3.613086025 3.136305682 3.135804119 1.545848822 1  
 4.785588104 3.054178944 1.967475324 0.946549518  
 YIL170W YIL170W::HXT12::molecular\_function unknown 1 1.631550905  
 1.374288107 1.354010853 1.339450981 1 1.670031317 1.807071243  
 1.444027475 1.321032645 1 1.610980805 1.133612366 1.256357118 1  
 1.054405582 1.009586462 0.822316036 1  
 1.014550591 0.998218484 1.215147939 0.92274914 1.032769288 1  
 1.309389443 1.681299024 1.103141026 1 1.212194994 1.230375751  
 1.043183574 0.664720784 0.855484646  
 YIL172C YIL172C::YIL172C::alpha-glucosidase 1 0.925248993 0.94251189  
 1.421483858 1.012771461 1 1.108041296 0.926095055 1.183599679 1  
 1.094611033 1.065929838 0.978528557 1.494729846 1.106003727  
 1.57512637 1 1.044108589  
 1.215109813 1.276627191 1.167721752 1.180765147 1 1.039747093  
 1.109363413 1.243745896 1.1415603 0.827635888 1 1.403177376  
 1.181600934 1.175757044 0.932558327 1.220907041 0.718011674  
 YIR009W YIR009W::MSL1::involved in splicing 1 1.180831182 1.602815987  
 1.374261337 1.877705396 1 1.272074397 1.364350861 1.719544364  
 1.654632135 1 1.23909701 1.658310611 1.62556024 1.647031138 1  
 0.686319881 0.744780824 1.171309185 1 0.875406301 1.34241812  
 0.923609678 1 1.040452257 1.271604068 1.152280833 1.101035492  
 1.20606847 1 1.388466012 1.65044882 1.16581793 1.521283638  
 1.633709573 1 1.565140971 1.140632771 1.691298374 0.79465395  
 1.966170497 0.712757945  
 YIR011C YIR011C::STS1::restores protein transport when overexpressed and  
 rRNA stability to a sec23 mutation 1 1.208154419 1.120188525 1.234281343

1.285128036 1 1.086532733 1.053737138 1.113440915 1.209729457 1  
1.024860077 1.175282759 1.033085803 0.981995783 1 1.400167983  
1.424762164 1.687439153 1.499549104 1 0.662126539 0.615879138  
0.553125047 0.555923535 1 0.911956702 1.208522552 0.722048157  
0.74474227 0.912692394 1 0.989168997 1.320288263 0.810381007  
0.9171615 1.343863267 1 1.410483471 1.251383598 1.24304073  
1.243559822 1.449381566 1.106788787  
YOR340C YOR340C::RPA43::DNA-dependent RNA polymerase I subunit A43 1  
0.735137082 0.68941267 0.76500255 0.815277409 1 0.787237466  
0.660711912 0.714684808 0.888979153 1 0.534458484 0.357763917  
0.313660912 0.814039782 1 0.444415048 0.205405631 0.280276635  
0.724018281 1 0.927498208 0.590627853 0.343197191 0.818007459 1  
0.756267557 0.688588519 0.658038154 0.841977979 0.871498664 1  
0.868340598 0.625867064 0.533249088 0.829953673 1.324442936 1  
0.666497608 0.710174207 0.943645073 1.413400278 0.699738569 1.72147675  
YIR013C YIR013C::GAT4::very short and so far mRNA can't be detected 1  
1.473631452 1.473994887 1 1.320717922 1.432521914  
1 1.226573158 1.425817805 1.758527052 1.348741171  
0.49510766 0.188595055 1 0.952820912  
1.046971548 1.076565111 1.151104134 1.012518952 1 0.803238967  
0.851632901 0.704991448 1.140362303 1 1.054056043 0.830815429  
1.021245182 1.259632558 1.279506089  
YOR342C YOR342C::YOR342C::molecular\_function unknown 1 0.591483378  
0.684610633 0.804932069 0.769236063 1 0.685465728 0.675377593  
0.891997322 0.848586639 1 0.385554603 0.415193696 0.773954607 1  
0.527526033 0.380031936 0.629130064 1.116004006 1 0.498848225  
0.845880634 0.967078026 1.056126887 1 0.824241963 0.750901368  
1.000773622 0.99199584 1.113394471 1 0.61082068 0.702592441  
0.720006802 0.913335432 1.205009369 1 0.495824074 0.632856597  
0.93012195 0.946912279 0.81926863 1.337077805  
YIR015W YIR015W::RPR2::RNase P Ribonucleoprotein - name given to subunits  
that are unique to RNase P (not subunits of RNase MRP) 1 1.168224411  
1.136310114 1.175708725 1.157323614 1 1.175564185 1.154927265  
1.109052792 1 1.02147518 1.170184262 1.066440002 1.228181978 1  
1.204758831 0.628584459 1  
0.796961527 1.128636221 1.015959554 1.117594418 1.062882831 1  
1.019520243 0.799181318 0.76584701 1.452148497 0.890526225 1  
0.792750754 0.719710282 0.918339881 0.893397521 0.877334681 0.933415171  
YOR344C YOR344C::TYE7::may be involved in glycolytic gene expression 1  
0.731156634 0.7908461 0.978132975 1.405522413 1 0.817864057  
0.867823576 1.033655786 0.959193669 1 0.696702882 0.918947749  
0.648504936 1.186086144 1 1.536645684 0.921796241 0.958184138  
1.437344226 1 1.14766183 1.397716016 1.050139972 1.128340317 1  
1.39009472 1.020449833 0.612716756 0.748653338 0.898237996 1  
1.913609779 1.867544736 1.914438257 2.310027411 1.955876609 1  
2.326304718 1.859433254 1.133570712 1.351863384 1.565353771 2.209199354  
YIR017C YIR017C::MET28::Transcriptional activator of sulfur amino acid  
metabolism 1 1.993353353 1.958881937 1.136670298 1.351164468 1  
1.517905672 1.502085103 1.253676265 1 2.447399253 2.5083363  
1.936152402 1.177843191 1 2.483940275 1.335426592 1.980162251 1  
1.607430723 1.384946066 1 1.213931805 0.921419648  
1.506630438 1.25120022 0.99659752 1 1.721336082 1.271136973  
1.522282262 1.592545542 1.380204517 1 3.044469675 2.915714573  
2.524250175 1.841505496 2.668076497 1.14969428  
YOR358W YOR358W::HAP5::Regulates respiratory functions; subunit of a  
heterotrimeric complex required for CCAAT binding 1 1.093850205  
1.371211212 1.103563132 1.039729024 1 1.199200182 1.407598226

|             |                                                                                                    |             |             |             |             |
|-------------|----------------------------------------------------------------------------------------------------|-------------|-------------|-------------|-------------|
| 1.269396623 | 1                                                                                                  | 1.178589133 | 1.555332421 | 1.051239276 | 1           |
| 1.322957386 |                                                                                                    | 1.239017549 | 1.437841711 | 0.894080264 | 1.200967207 |
| 0.696636636 | 0.4696419                                                                                          | 1           | 0.87386736  | 1.052168098 | 0.882569176 |
| 0.987067047 | 1.047422958                                                                                        | 1           | 0.917962524 | 1.151560397 | 1.057729941 |
| 1.106226809 | 1.28819905                                                                                         | 1           | 1.045477676 | 0.943448052 | 0.96492284  |
| 0.792875554 | 1.370566817                                                                                        | 1.315187225 |             |             |             |
| YIR019C     | YIR019C::MUC1::Required for invasion and pseudohyphae formation in response to nitrogen starvation |             |             |             |             |
|             | 1                                                                                                  | 1.99421831  | 1.722423585 |             |             |
| 1.640589022 | 1                                                                                                  | 1.946032903 | 1.836846453 | 1.624602969 | 1.745569999 |
| 1.620162896 | 1.843162552                                                                                        | 1.531350333 | 1.716290715 |             |             |
|             | 1.007515345                                                                                        |             | 1           | 0.996611966 | 1.175741905 |
| 1.105485057 | 1.193863972                                                                                        | 0.967845548 | 1           | 0.584680573 | 0.49580713  |
| 0.664926236 | 0.756557636                                                                                        | 0.456439896 | 1           | 0.672745042 | 0.663723558 |
| 0.640479671 | 0.576997196                                                                                        |             |             |             |             |
| YIR019C     | YIR019C::MUC1::Required for invasion and pseudohyphae formation in response to nitrogen starvation |             |             |             |             |
|             | 1                                                                                                  | 1.36417792  | 1.530786323 |             | 1           |
|             | 1.240494326                                                                                        | 1           | 1.013757714 | 1.337955032 | 1.57077325  |
|             | 0.799485069                                                                                        | 0.852117547 | 0.585877373 | 0.467995146 |             |
|             | 1                                                                                                  | 1.210727605 | 1.069585478 | 1.271171481 | 1.396271489 |
|             | 1.168363222                                                                                        | 1           | 1.68363222  | 1           | 1.171031993 |
| 1.084561612 | 2.151305911                                                                                        | 1.287436152 | 1.523448807 | 1           | 1.171031993 |
| 1.769137009 | 0.906099021                                                                                        | 1.204875975 | 1.058789268 | 3.479729756 |             |
| YOR360C     | YOR360C::PDE2::low-Km (high-affinity) cAMP phosphodiesterase                                       |             |             |             |             |
|             | 1                                                                                                  |             |             |             | 1           |
| 1.425477439 | 1.002228686                                                                                        | 1.420615472 | 1.224374433 | 1           | 1.509728159 |
| 1.331516112 | 0.95912748                                                                                         | 0.987519244 | 1           | 1.084939608 | 0.926921764 |
| 0.735819246 | 1.056939512                                                                                        | 1           | 0.871798805 | 0.775135531 | 0.714814226 |
| 0.820360215 | 1                                                                                                  | 0.765891234 | 0.618061085 | 0.487012752 | 0.876547729 |
| 0.923242154 | 0.772595333                                                                                        | 0.76283206  | 0.882169084 | 0.952198709 | 1           |
| 0.838616212 | 0.836424816                                                                                        | 0.574911448 | 0.612918064 | 0.726686914 | 1           |
| 0.904075181 | 0.960587782                                                                                        | 0.880630327 | 1.285741726 | 0.982618358 | 2.02531828  |
| YIR033W     | YIR033W::MGA2::Product of gene unknown                                                             |             |             |             |             |
|             | 1                                                                                                  |             |             |             | 0.760688992 |
| 0.827500344 | 1.154672296                                                                                        | 0.774633555 | 1           | 1.059071259 | 1.147744383 |
| 0.807730509 | 0.752289853                                                                                        | 1           | 1.046721235 | 0.999660073 | 0.484799451 |
| 1.29134931  | 1                                                                                                  |             | 0.754844561 | 0.785287317 | 0.881274453 |
| 0.812945211 | 0.890362752                                                                                        | 1           | 1.027678656 | 1.3605002   | 1.133524499 |
| 1.114115573 | 0.987588173                                                                                        | 1           | 1.609610536 | 1.518591452 | 1.648562853 |
| 1.114344018 | 1.477701321                                                                                        | 1           | 1.500771637 | 1.618926648 | 1.115065416 |
| 1.316997479 | 0.764082315                                                                                        | 0.742529143 |             |             |             |
| YOR362C     | YOR362C::PRE10::proteasome component YC1 (protease yscE subunit 1)                                 |             |             |             |             |
|             | 1                                                                                                  | 0.840887281 | 1.063290015 | 1.158109309 | 1.0003892   |
|             | 1                                                                                                  | 1.003810378 |             |             |             |
| 1.044911629 | 1.517582825                                                                                        | 1.155290898 | 1           | 0.966164494 | 1.364736064 |
| 1.687396254 | 1.168172585                                                                                        | 1           | 2.003679179 | 2.03472181  | 2.383351154 |
| 1.969626695 | 1                                                                                                  | 1.405927105 | 1.800582839 | 1.926279248 | 1.574119167 |
| 1.185377476 | 1.474649949                                                                                        | 1.629889786 | 0.918115059 | 1.179945381 | 1           |
| 1.057796008 | 1.280061345                                                                                        | 1.025370436 | 0.90615156  | 0.577982126 | 1           |
| 1.963534105 | 1.444297387                                                                                        | 1.473074866 | 1.027498895 | 1.288542812 | 1.809039171 |
| YOR364W     | YOR364W::YOR364W::molecular_function unknown                                                       |             |             |             |             |
|             | 1                                                                                                  |             |             |             | 1.30709886  |
| 1.428264337 | 1                                                                                                  |             |             |             | 1.224795826 |
| 1.629286886 | 1.768603346                                                                                        | 1           | 0.608413309 | 1.1739549   |             |
| 1.203747119 | 1                                                                                                  | 0.980464453 | 2.991495015 | 1.193759013 | 1.18487739  |
| 0.850726609 | 0.878039779                                                                                        | 1.037301482 | 0.952928293 | 1.114433008 | 1           |
| 0.936348769 | 1.02648872                                                                                         |             | 1.099363335 | 1           |             |
| 1.210529056 | 1.023174215                                                                                        | 5.253744    |             |             |             |
| YOR366W     | YOR366W::YOR366W::molecular_function unknown                                                       |             |             |             |             |
|             | 1                                                                                                  |             |             |             | 1.48391491  |
| 1.520988982 | 1                                                                                                  | 1.549794218 | 1.929898077 | 2.018968823 | 1           |
| 1.257400491 | 1.706558023                                                                                        | 2.329153282 | 1.593498257 | 1           | 1.594912083 |
| 2.636714267 | 2.343923811                                                                                        | 1           | 1.150626322 | 3.736245536 | 1.381673431 |

1.148442037 1 0.987376539  
1

YOR368W YOR368W::RAD17::DNA Damage checkpoint control 1 1.327345196  
1.17932908 1.183683514 1.451838278 1 1.189198724 1.061535571  
1.323912745 1.254555019 1 0.869870457 0.946561116 0.913978071  
1.028060162 1 0.673478126 0.534139249 0.467123716 1  
1.414009887 0.997462757 1.085416801 1 0.928882534 1.01622421  
0.762120439 0.962421191 1.186140001 1 0.797061239 0.88723768  
0.658742582 0.583661243 0.960993118 1 0.947602013 1.041361099  
0.856622503 1.376725185 0.967617431

YOR382W "YOR382W::FIT2::FIT1, FIT2, and FIT3 code for mannoproteins that are incorporated into the cell wall via glycosylphosphatidylinositol anchors." 1  
1.25525446 1.542679453 1.124295875 2.002885895 1 1.225841177  
1.280824118 2.377727466 2.431119748 1 5.126862949 7.274871906  
9.122517203 2.091793744 1 6.685126706 7.806882352 5.180586258  
5.821827379 1 5.849939988 12.84165243 5.219310851 3.130831021 1  
10.02582003 30.35783939 33.69730636 3.930191769 4.66868345 1  
16.8134416 122.6699417 139.8871521 77.98344072 2.788837368 1  
33.8111761 126.6172596 81.23288399 1.667955527 1.182019954 5.691556

YIR035C YIR035C::YIR035C::molecular\_function unknown 1 1.147557726  
1.058028601 0.796650193 0.829888589 1 1.0168623 1.038760556  
1.272536208 1.295625817 1 1.031487013 1.062497902 1.133765366  
1.173380936 1.011688304 0.723392879 0.738071505 0.843058254 1  
1.202879652 1.404215847 1.041125921 0.579715146 1 0.8021477  
0.766058958 0.804090657 0.712142013 0.686310846 1 0.903328147  
0.936143649 0.920992212 1.036766776 1.341180175 1 1.294027078  
1.413394598 1.291570692 1.150153659 1.049364466 1.292420981

YIR037W YIR037W::HYR1::Hydroperoxide resistance conferring gene 1  
1.425057711 1.572499258 1.31167856 2.570256104 1 1.192024925  
1.457225063 2.072416226 2.418142407 1 1.262774119 1.587916206  
3.433183306 1.796139922 1 1.426103538 1.377451933 2.117456109  
2.90753114 1 1.413315924 2.425203733 3.391807118 2.15347623 1  
1.011650139 1.129957713 1.268266833 0.983910299 0.956267946 1  
1.298419692 2.3365703 2.339516873 2.131249066 2.178526626 1  
1.23097254 1.677946854 1.437557864 1.669956825 1.712532867 1.073514981

YIR039C YIR039C::YPS6::Gpi-anchored aspartic protease (Yapsin 6)  
0.687058181 0.818810121 1.087956047 0.705836664 0.806344858  
1.137923767 1.00830975 0.911923138 1.042871691 1.54426686  
2.129127283 1.280517581 1 3.795713997 3.450391594 7.123998515  
3.694761419 1 1.933258122 2.10049035 3.2157909 3.482420726 1  
1.113944924 1.574005672 1.761747394 1.147089318 1.298037095 1  
1.529715799 2.635123934 2.863544073 2.061746439 1 1.030199366  
1.262070326 1.874828378 1.199419748 1.016599476

YIR041W YIR041W::YIR041W::molecular\_function unknown 1 2.267568287  
1.852337841 1.921423678 2.017836732 1 2.01270317 1.766880171  
1 1.831800732 1.859957017  
1 0.786331208 0.598200761 0.826190056  
0.686964242 0.666933173 1 1.606493222 0.804813822 1  
1.350983357 1.088191774 0.882642084 1.37586475 0.793923385 4.143452658

YIR043C YIR043C::YIR043C::molecular\_function unknown 1 1.632168156  
1.382259619 1.203526904 1.644545454 1 1.319488507 1.211847044  
1.402950577 1.560639258 1 1.339921034 1.484730815 1.967767371  
1.223872768 1 2.51279644 2.026912509 2.733245329 2.536313934 1  
1.330983803 1.551487993 1.903707431 1.239789669 1 1.066887555  
1.087291585 1.434610836 1.336039534 1.142921422 1 0.857205316  
1.207864939 0.944128768 0.673323464 0.760793353 1 1.435135059  
1.280304709 0.99846103 0.941650962 1.490011022 0.915902707

YOR384W YOR384W::FRE5::similar to FRE2 1 1.16037697 0.870037436  
 1.100046377 0.592542158 1 1.293772134 1.354542578 0.68572587  
 0.554521254 1 1.634178124 1.254345054 0.411247605 0.781708366 1  
 1.740061954 2.0794966 0.463005174 1  
 1.175814935 1.190076287 1.639442149 0.986923249 0.97204139 1  
 1.443145778 0.953942456 1.506855806 1.124284957 0.316926706 1  
 1.246519365 0.983609131 0.714806816 0.719028239 0.624498243  
 YJL013C YJL013C::MAD3::checkpoint protein required for cell cycle arrest in  
 response to loss of microtubule function 1 0.99191682 1.138285846  
 1.328915438 1.404480515 1 1.258327912 1.29996398 1.304594236  
 1.296980566 1 1.143616109 1.416205087 1.290051865 1.486053393 1  
 1.485332938 1.466218082 1.156707494 1.120455505 1 1.278650848  
 1.070942737 0.950050592 0.840099103 1 0.860607642 0.695553194  
 0.705366855 0.901766429 1 1.340695683 1.02609252 0.671248725  
 0.946996277 1.196696102 1 1.559872443 1.100867509 1.261269002  
 0.977701886 1.612107766 1.164579958  
 YOR386W YOR386W::PHR1::photolyase 1 0.861184414 1.175049271  
 1.2892236 0.863230022 1 1.1570208 1.203050502 0.722164328 1  
 1.196678432 1.761570553 0.726952827 1.185270701 1.655743805  
 1.556278882 1.282479986 0.8155523 1.363239561 1.160711308  
 0.594662288 1 1.134461886 1.619682934 1.368814301 1.03104767  
 1.281908717 1 1.416826376 0.875921348 2.053853007 1.461703912  
 0.821779466 1 1.530767536 1.274850232 1.623930041 1.039489275  
 2.560159757 1.738113653  
 YJL015C YJL015C::YJL015C::molecular\_function unknown 1 1.243871715  
 1.835893864 1.253616341 1.920182352 1 1.285972301 1.215902598  
 2.014038239 1.748856286 1 1.340319039 2.738726343 10.57218088  
 2.287628701 1 1.897670068 1.761639229 4.312050036 3.606860031 1  
 1.632089388 4.615926657 5.494740342 1.706464133 1 0.738859097  
 0.859759695 0.639296095 0.567167849 0.744118949 1 1.004986478  
 1.756447017 1.422173686 1.487180081 2.321974191 1 1.388988849  
 1.764188233 1.435766403 2.139036662 1.935544589 0.976320768  
 YOR388C YOR388C::FDH1::Protein with similarity to formate dehydrogenases 1  
 1.508262853 1.258461861 1.352185787 1.365031354 1 1.293749882  
 1.33401035 1.275549777 1 1.121767513 1.286000181 1.129918268  
 1.150732139 1 1.077084301 0.669813155  
 1 0.741790245 0.626983742 0.741878798 1  
 0.614669792 0.766326065 1.645744521 1 0.680469274 0.829032217  
 1.003705362 0.943649442 1.986993902  
 YJL017W YJL017W::YJL017W::molecular\_function unknown 1 0.9004513  
 0.881617509 1.305662721 0.876866514 1 1.150799908 1.335113255  
 0.916164915 0.857966003 1 1.075084628 1.78520359 2.086393035  
 1.645499533 1 1.010266517 1.016453058 2.131681559 1.631589745 1  
 1.22995411 2.44079993 1.563043967 1.497308109 1 0.975706223  
 0.941921676 1.425694038 1.181220173 1.018780162 1 0.804491955  
 0.708702358 1.072631122 0.931581382 0.637714877 1 1.019037603  
 0.750830127 1.192669398 0.960505991 1.238306597 0.88002116  
 YOR390W YOR390W::YOR390W::molecular\_function unknown 1 1.128830052  
 0.705226565 0.915957188 0.801946877 1 1.061762823 0.80541584  
 0.624953067 0.721805862 1 0.731538106 0.602966964 0.523800974  
 0.592489507 1 0.600044495 0.507023508 1 0.515003778  
 0.423206093 1 0.811581629 0.630733634 0.747567107  
 1.233612283 0.756064053 1 0.548359 0.421947227 0.414921764  
 0.47651859 0.502008654 1 0.471817088 0.391749279 0.758197115  
 0.817815899 0.80134285 0.915902707  
 YJL019W YJL019W::MPS3::MonoPolar Spindle 1 0.809737787 0.811411866  
 1.018422015 0.560163709 1 1.034418445 1.067574653 0.882777832

0.654581144 1 0.951628373 0.785960982 0.385619071 1.227013745 1  
0.944676145 0.465240746 0.874240142 0.646728259 1 0.631786274  
0.797041112 0.356143884 0.597462612 1 0.87668061 0.807418528  
1.161815889 1.187527733 1.118037465 1 0.86688211 0.473738533  
0.692648535 0.921954408 0.470163334 1 1.079518177 0.76448155  
1.442259732 0.846686015 1.057251149 0.67072796  
YOR392W YOR392W::YOR392W::molecular\_function unknown 1.122933745  
1.231668587  
1 0.914533216 1.4364803 1.769806852 1 0.726059674  
0.97235437 0.820384688 1.642426176 0.779850678  
1 1.265444456 1.333195482 1.473493579  
1.079027374 3.900904853  
YOR392W YOR392W::YOR392W::molecular\_function unknown  
1.41099546 0.991220815  
0.724536148 0.772422296  
1 0.649752227 0.822917733 0.96002899 0.881119007  
0.869592861 1 0.430870718 0.587755263 0.750609192 0.852651331  
1.066398233 1 0.694262503 1.324501859 0.983707401 1.33997755  
YJL021C YJL021C 1 0.984413021 1.239204374 1.065782362 1.133368536 1  
1.141457569 1.264772114 1.107471473 1.089660411 1 1.16168952  
1.524355617 2.160948969 1.063253545 1 2.196845662 2.171893452  
3.516623381 2.053793341 1 0.831251636 1.516770722 1.240240614  
0.876578964 1 1.013437885 1.444331638 1.438163856 1.058652272  
0.763089655 1 0.96767332 1.425826267 1.485980841 1.171411137  
1.270379353 1 1.07120229 1.641334959 1.201775418 1.09946807  
1.2136378 0.948300744  
YPL012W YPL012W::RRP12::Required for normal pre-rRNA Processing 1  
0.791978002 0.517851183 0.956388801 0.767313344 1 0.716996134  
0.692143471 0.664320464 0.773833237 1 0.461235959 0.311217411  
0.250060429 0.842843911 1 0.29793434 0.257855498 1  
0.247299529 0.17619396 1 0.673166832 0.428316153  
0.70129433 1.050881783 0.730921344 1 0.684707531 0.366443807  
0.334192829 0.741842572 0.516293555 1 0.364996818 0.379221235  
0.710114705 0.778246411 0.325165352 0.836220905  
YPL014W YPL014W::YPL014W::molecular\_function unknown 1 0.852763497  
0.621845079 0.653331897 1 0.790942496 0.819358249 0.722136164 1  
1.123757124 1.247064861 0.997357832 0.596722025 1 2.007614487  
1.697372619 2.471140631 1.069127738 1 1.783345819 2.085675164  
1.936128901 0.895958807 1 1.152206917 0.948169766 0.925842006  
1.204201812 1.008907738 1 1.050332021 0.795289611 0.601717227  
0.949900745 0.610012437 1 0.935113673 0.738313541 0.874319402  
0.834366183 0.540434529 6.810603365  
YPL014W YPL014W::YPL014W::molecular\_function unknown 1.244831203  
0.75161991 1.32053042 1.00490422 1.122546355 0.898336405  
0.726069267 1.199603846 0.894828599 0.548057468 0.762632416  
1 1.527719389  
1.600142338 1.200757153 1.101964773 1.484975175 1 1.105426146  
1.05926609 1.316479281 1.178106612 1.263034102 1 1.282907248  
1.287529566 1.11084992 0.921172675 1.439168762 0.919405158  
YPL016W "YPL016W::SWI1::Global transcription activator that acts in complex  
with Snf2p, Snf5p, Snf6p, and Swi3p to assist gene-specific activators; involved  
in the regulation of expression of many genes, including ADH1, ADH2, GAL1, HO,  
INO1 and SUC2" 0.913614934 1.035185539 0.778229594 0.985821753  
0.829348683 0.769965755 1.057334011 0.924313386 0.669125769  
0.8271347 1.153374629 0.728367833 1 1.087925514 1.126825935  
1.11657754 1.188560344 1 1.26242809 1.371172957 1.402736096  
1.498101149 1.335275321 0.712390364 1.097214001 0.736861791

|             |                                                                                                                                                       |             |             |             |   |             |  |
|-------------|-------------------------------------------------------------------------------------------------------------------------------------------------------|-------------|-------------|-------------|---|-------------|--|
| 0.771238827 | 1                                                                                                                                                     |             |             | 1           |   | 1.432542105 |  |
| 1.315330755 |                                                                                                                                                       | 9.806988633 |             |             |   |             |  |
| YPL018W     | YPL018W::CTF19::Chromosome Transmission Fidelity                                                                                                      |             |             |             |   | 1           |  |
| 1.848892935 | 1.732337238                                                                                                                                           | 1.670244893 | 1.554343072 | 1           |   | 1.75402349  |  |
| 1.857908213 | 1.54860533                                                                                                                                            | 1.576706486 | 1           | 1.586138575 |   | 2.294385315 |  |
| 3.923507369 | 1.54287517                                                                                                                                            |             | 0.608688249 | 0.638504932 |   | 1           |  |
| 1.696167324 | 2.509882551                                                                                                                                           |             | 1           | 0.874924742 |   | 1.091746054 |  |
| 1.080501852 | 1.293441237                                                                                                                                           | 1.249566196 | 1           | 0.694611509 |   | 0.730178215 |  |
| 0.974408185 | 1.489918387                                                                                                                                           | 0.887099189 | 1           | 0.604107003 |   | 0.650290161 |  |
| 1.278260358 | 0.618227564                                                                                                                                           | 1.011035896 | 2.099746354 |             |   |             |  |
| YPL020C     | YPL020C::ULP1::Ubl (ubiquitin-like protein)-specific protease 1; initially processes Smt3; also acts as a deconjugating enzyme for Smt3               |             |             |             |   | 1           |  |
| 0.9804764   | 1.296222067                                                                                                                                           | 1.333057696 | 1.264024287 | 1           |   | 1.250068609 |  |
| 1.087127964 | 1.013357837                                                                                                                                           | 0.997787468 | 1           | 0.985811242 |   | 1.338340428 |  |
| 1.064591162 | 1.193580407                                                                                                                                           |             |             | 0.60896278  |   | 1           |  |
| 1.213769175 | 1.165863448                                                                                                                                           |             |             | 0.884477248 |   | 1.111844357 |  |
| 0.993150438 | 0.668023405                                                                                                                                           | 0.970268264 | 1           | 1.274291816 |   | 2.074726785 |  |
| 1.823778344 | 1.54489853                                                                                                                                            | 1.146286743 | 1           | 1.877932906 |   | 2.30496958  |  |
| 1.467055922 | 1.32051473                                                                                                                                            | 2.001712248 | 1.164579958 |             |   |             |  |
| YJL023C     | YJL023C::PET130::Nuclear gene encoding mitochondrial protein                                                                                          |             |             |             |   | 1           |  |
| 0.849792049 | 1.026508                                                                                                                                              | 1.062204575 | 1.137733936 | 1           |   | 1.01929151  |  |
| 1.103318498 | 1                                                                                                                                                     | 0.803393245 | 0.934525847 | 1.07997398  |   | 1.146494168 |  |
| 1.212574263 | 1.052261025                                                                                                                                           | 2.083819733 | 1           | 1.315304668 |   | 2.691849142 |  |
| 2.06356306  | 2.05534777                                                                                                                                            | 1           | 1.033338841 | 1.214678074 |   | 0.990006639 |  |
| 0.996626992 | 1.149053562                                                                                                                                           | 1           | 1.00915489  | 1.191672224 |   | 1.170556887 |  |
| 1.429868887 | 2.147882003                                                                                                                                           | 1           | 1.039610544 | 1.048965407 |   | 1.292498574 |  |
| 1.143314915 | 1.219760063                                                                                                                                           | 1.003465128 |             |             |   |             |  |
| YJL037W     | YJL037W::YJL037W::molecular_function unknown                                                                                                          |             |             |             |   | 1           |  |
|             | 1                                                                                                                                                     |             | 1           |             |   | 2.098202078 |  |
| 2.000801203 | 1                                                                                                                                                     | 0.901471005 |             | 2.320556816 |   | 0.1268942   |  |
|             | 1                                                                                                                                                     | 0.99834816  | 1.076552418 | 1.107999912 |   | 0.902646829 |  |
| 0.939910703 | 1                                                                                                                                                     | 0.888533841 | 1.307213607 | 1.418037182 |   | 1.337008399 |  |
| 1.178949594 |                                                                                                                                                       | 0.884022725 | 0.95298414  | 0.95823306  |   | 0.911020622 |  |
| 1.183487623 | 1.20660989                                                                                                                                            |             |             |             |   |             |  |
| YJL039C     | YJL039C::NUP192::large yeast nucleoporin                                                                                                              |             |             |             |   | 1.297776523 |  |
| 1.059100748 | 1.581058482                                                                                                                                           | 1.042602041 |             | 1.647800738 |   | 1.673934221 |  |
| 0.902311372 | 0.893337765                                                                                                                                           |             | 1.38285985  | 1.243875191 |   | 0.424189464 |  |
| 1.214925404 |                                                                                                                                                       |             | 0.621635137 |             |   |             |  |
| 1           | 0.958139966                                                                                                                                           | 0.937037704 | 1.106217388 | 1.348607799 |   | 0.977411516 |  |
| 0.903834429 | 0.832403141                                                                                                                                           | 0.611895646 | 0.763086638 | 0.509982858 |   | 1           |  |
| 0.777799416 | 0.772335806                                                                                                                                           | 0.908916905 | 0.765214057 | 0.702735157 |   | 0.87825089  |  |
| YJL042W     | YJL042W::MHP1::Similar to a 250 kD Drosophila microtubule-associated protein (MAP) (which can rescue MHP1 null mutant) and to mammalian MAP4 proteins |             |             |             |   |             |  |
| 1           | 0.95921061                                                                                                                                            | 0.858591376 | 1.069678638 | 0.710669898 | 1 | 1.099809224 |  |
| 1.098485487 | 0.790458243                                                                                                                                           | 0.681767705 | 1           | 1.180141008 |   | 1.241607138 |  |
| 0.760316322 | 0.870399433                                                                                                                                           |             | 1.637129392 | 1.776495447 |   | 1.33089571  |  |
| 0.497802888 | 0.471779924                                                                                                                                           |             | 1           | 1.079679747 |   | 1.053928148 |  |
| 1.352897293 | 1.567000564                                                                                                                                           | 1.330739222 | 1           | 1.239263712 |   | 0.907688838 |  |
| 0.923138947 | 1.182394239                                                                                                                                           | 0.723340524 | 1           | 1.034613533 |   | 0.874950186 |  |
| 0.990485746 | 0.732815711                                                                                                                                           | 0.930097515 | 1.085773768 |             |   |             |  |
| YJL044C     | YJL044C::GYP6::GTPase-activating protein for Ypt6                                                                                                     |             |             |             |   | 1           |  |
| 1.098744665 | 1.015013882                                                                                                                                           | 1.058652289 | 0.901801426 | 1           |   | 1.110122636 |  |
| 1.068078038 | 1.17245193                                                                                                                                            | 1.02233001  | 1           | 0.935578797 |   | 1.040954138 |  |
| 0.916794055 | 1.03139769                                                                                                                                            | 1           | 1.263834222 | 1.020817377 |   | 0.998317356 |  |
| 1.794109165 | 1                                                                                                                                                     | 1.118367163 | 1.216243266 | 1.765544347 |   | 1.187743689 |  |
| 0.994614785 | 0.913812561                                                                                                                                           | 0.911638123 | 0.903793418 | 1.084555285 |   | 1           |  |



0.966537977 0.826292048 0.91152469 0.831295538 1.141576517 1  
0.92340527 1.118291235 1.064385577 1.169078635 1.159226126 0.851982143  
YJL046W YJL046W::YJL046W::molecular\_function unknown 1 0.784187374  
1.019645872 0.986970081 1.026195112 1 0.863134 1.002924614  
1.083362699 1.006803457 1 0.923658129 1.082832568 0.916976425  
0.925330938 1 1.054727125 0.831367444 0.836993828 1.295063574 1  
1.433938336 2.368489539 2.0892081 0.774551141 1 1.001310641  
1.228374889 0.746628928 0.753442201 1.057331674 1 1.255927187  
1.583435694 0.800594126 0.903719019 1.35568485 1 1.686841529  
1.031017068 1.214878049 1.56664543 1.157574951  
YJL048C YJL048C::YJL048C::molecular\_function unknown 1 1.034573889  
1.188167519 1.189957676 1.263389866 1 1.525949159 1.171473851  
1.231701598 1.156112631 1 1.4579619 1.833934144 2.00443215  
0.955514947 1 2.098366484 1.635841649 2.290704519 2.346408826 1  
2.331133194 2.539951224 4.183332958 1.561807301 1 0.765777072  
0.624175167 0.532364797 0.7632355 0.921571512 1 0.655278575  
0.668616757 0.414363006 0.87926932 1.830724691 1 0.805257457  
0.623088451 1.19981228 1.181437425 1.745239447 1.336202244  
YJL062W YJL062W::LAS21::Local Anesthetics Sensitive: involved in the  
attachment of glycosylphosphatidylinositol (GPI) anchors to proteins. 1  
0.780039803 0.720736289 0.806313215 0.679850109 1 0.860778732  
1.035396714 0.633331703 0.73853815 1 0.954350994 0.791608073  
0.568951882 0.653763226 1 0.923426551 0.671379186 0.872597247  
0.657911468 1 0.893336545 0.648880851 0.611770326 0.644341645 1  
0.96962861 1.030907913 1.095676405 1.240361867 0.843615557 1  
0.882076491 0.692410325 0.844865836 0.729864203 0.475177138 1  
0.873459474 0.779291629 0.933818435 0.769645279 1.060377016 0.633951756  
YJL064W YJL064W::YJL064W::molecular\_function unknown 1 1.255039104  
1.589253027 1.28553213 1.785864756 1 1.317565637 1.20518448  
1.621375933 1 1.322863061 1.449121214 1.709590574 1.441047655 1  
0.884609512 0.611349951 0.545189551 0.995296151 1 1.541462672  
1.08509653 2.137042436 1.396457113 1 1.194593483 1.021732229  
0.76488727 0.817794856 0.917334709 1 1.059103824 1.086444649  
1.232357258 0.870516623 1.30295507 1 1.045267881 1.256616536  
1.037169831 1.388771502 1.306788682 2.161039975  
YJL066C YJL066C::MPM1::mitochondrial membrane protein 1 1.101606417  
1.420578334 1.296567005 1.42228489 1 1.287746837 1.521550725  
1.357337072 1.569022505 1 1.205745542 1.543840502 2.289973389  
1.349544311 1 1.895057802 1.549124972 1.951437667 2.27339015 1  
1.495148466 2.014878846 2.584473626 1.798109679 1 1.160576969  
1.245485884 0.958862624 0.793485705 1.002142966 1 1.199777892  
1.521994905 1.666030014 1.05506817 1.372048286 1 1.513027799  
2.021021241 1.098338911 1.609186442 1.31080911  
YJL068C YJL068C::YJL068C::not yet annotated 1 1.054771052 1.090173115  
1.190769632 0.814566203 1 1.143425681 1.326541718 1.248225464  
1.313700778 1 1.124503766 1.435870564 2.456107722 1.278585749 1  
1.313040755 1.277411107 1.7255988 2.502674393 1 1.252181119  
1.588587157 1.964304274 2.208510961 1 1.349611732 0.927226936  
1.81610818 1.29977375 1.076116359 1 1.249137828 1.181996626  
2.158516092 1.614631718 0.545593666 1 1.278186836 1.406120005  
0.83752465 1.019917619 1.139186823  
YJL070C YJL070C::YJL070C::molecular\_function unknown 1 1.612197959  
1.908469327 1.5484807 1.862338899 1 1.600886285 1.693044324  
1.683634703 1.729573774 1 1.569725262 1.832941303 2.713674803  
1.422473741 1 1.09641571 1.22170808 1  
2.274902205 1 0.632765654 0.669074521 0.692654011  
0.726138379 0.758745318 1 0.943662823 0.604323401 0.559953501

|         |                                                                                                                                   |             |             |             |             |             |
|---------|-----------------------------------------------------------------------------------------------------------------------------------|-------------|-------------|-------------|-------------|-------------|
|         | 1.08256025                                                                                                                        | 1           | 0.897705205 | 0.66564953  | 0.436210083 | 1.408014414 |
|         | 0.65869353                                                                                                                        |             | 0.964937646 |             |             |             |
| YJL072C | YJL072C::YJL072C::molecular_function                                                                                              | unknown     | 1           | 1.05929529  |             |             |
|         | 1.043512953                                                                                                                       | 1.02229415  | 1           | 0.992301148 | 0.960611116 | 1.197907592 |
|         | 1.256437176                                                                                                                       | 1           | 1.204161673 | 0.969199108 | 0.972022485 | 1.024641517 |
|         | 1.014907779                                                                                                                       | 0.769107509 | 0.846139503 | 1.252373464 | 1           | 0.983578549 |
|         | 1.49505538                                                                                                                        | 0.947098057 | 0.98477824  | 1           | 1.056708991 | 1.272659444 |
|         | 0.869542234                                                                                                                       | 0.86196186  | 1.04435324  | 1           | 0.833570547 | 0.953097742 |
|         | 0.916217586                                                                                                                       | 0.806448983 | 0.995362901 | 1           | 1.268904308 | 1.122408307 |
|         | 1.148628716                                                                                                                       | 0.803167418 | 1.209236781 |             |             |             |
| YJL086C | YJL086C::YJL086C::molecular_function                                                                                              | unknown     |             | 0.889756387 |             |             |
|         |                                                                                                                                   | 0.109493142 | 0.501372186 | 0.44009567  | 1           | 0.330173507 |
|         | 0.417721594                                                                                                                       | 1           | 0.626792629 | 0.714808268 | 0.698484638 | 0.857716589 |
|         | 0.96291705                                                                                                                        | 1           | 0.816847317 | 0.536801343 | 0.817064886 | 1.244250491 |
|         | 0.50645115                                                                                                                        |             | 0.513316177 |             |             |             |
| YJL088W | YJL088W::ARG3::Sixth step in arginine biosynthesis                                                                                |             | 1           |             |             |             |
|         | 2.103642428                                                                                                                       | 1.573753169 | 0.780280531 | 1           | 1.059230815 | 1.002476448 |
|         | 0.602367069                                                                                                                       | 0.636763023 | 1           | 2.124050593 | 0.96990714  | 0.862665963 |
|         | 0.434975315                                                                                                                       | 1           | 1.678437877 | 1.940493088 | 1.120039811 | 1.185864151 |
|         | 1.754492759                                                                                                                       | 1.948686188 | 1.225655323 | 1.056484117 | 1           | 0.909894662 |
|         | 0.971428988                                                                                                                       | 1.101823025 | 0.989143405 | 1           | 0.964877508 | 0.678293157 |
|         | 1.721605657                                                                                                                       | 1.817812294 | 1.257937888 | 1           | 0.943376788 |             |
|         | 1.065567694                                                                                                                       |             | 0.935166396 |             |             |             |
| YJL090C | "YJL090C::DPB11::Part of the DNA polymerase II complex, acts in a checkpoint pathway during S-phase"                              |             | 1           | 0.908489954 | 0.953117307 | 1.223253296 |
|         | 1.093085706                                                                                                                       | 1           | 1.103583805 | 1.114338079 | 1.11357355  | 1           |
|         | 0.91676804                                                                                                                        | 0.838540165 | 0.78768573  | 1.032593305 | 1           | 0.967973265 |
|         | 1.053346276                                                                                                                       | 0.704690179 |             | 0.462174316 |             | 1           |
|         | 1.053738393                                                                                                                       | 0.894585968 | 0.896210005 | 0.876335981 | 1.111132567 | 1           |
|         | 0.923075497                                                                                                                       | 0.830247821 | 1.127693332 | 0.967340932 | 0.797845963 | 1           |
|         | 0.903253824                                                                                                                       | 0.958480366 | 1.164402174 | 1.040319199 | 0.983829895 | 1.042868171 |
| YJL092W | YJL092W::HPR5::Required for proper timing of committment to meiotic recombination and the transition from Meiosis I to Meiosis II |             | 1           |             |             |             |
|         | 0.862281511                                                                                                                       | 0.987173779 | 1.063337806 | 1.138630615 | 1           | 0.897759365 |
|         | 0.955010308                                                                                                                       | 1.135772    | 1.114219558 | 1           | 0.799933067 | 0.751853663 |
|         | 0.690329044                                                                                                                       | 1.007369749 | 1           |             | 0.643185304 | 0.656689552 |
|         | 1.589827016                                                                                                                       |             | 1.527474924 | 1.010479775 | 1           | 0.791327724 |
|         | 0.627016349                                                                                                                       | 0.822103959 | 0.937316378 | 1           | 0.893714269 | 0.85493024  |
|         | 0.837549953                                                                                                                       | 0.893914966 | 1.397821459 | 1           | 0.917851224 | 0.872075284 |
|         | 0.987115667                                                                                                                       | 0.966767087 | 1.095046642 | 0.746907259 |             |             |
| YJL094C | YJL094C::KHA1::putative K+/H+ antiporter                                                                                          |             | 1           | 1.000287617 |             |             |
|         | 0.897100826                                                                                                                       | 1.07567879  | 0.816847888 | 1           | 1.038998977 | 0.87698276  |
|         | 0.760111183                                                                                                                       | 1           | 1.14074128  | 0.985892036 | 0.657230956 | 0.931466846 |
|         | 0.917000511                                                                                                                       | 0.774631051 | 0.675191716 | 0.73217757  | 1           | 0.972509926 |
|         | 1.161489212                                                                                                                       | 0.704640722 | 0.974985734 | 1           | 1.764402547 | 1.488335274 |
|         | 1.380718201                                                                                                                       | 1.280639054 | 1.068024553 | 1           | 1.29767603  | 0.81875721  |
|         | 1.153159273                                                                                                                       | 0.803131411 | 0.444277654 | 1           | 1.13665551  | 0.931648921 |
|         | 0.9693263                                                                                                                         | 0.668837806 | 0.845191055 | 0.797693476 |             |             |
| YJL096W | YJL096W::MRPL49::mitochondrial ribosomal protein of the large subunit                                                             |             | 1           | 0.686103953 | 1.243109626 | 0.883441768 |
|         | 0.845827265                                                                                                                       | 0.924920179 |             | 1.454253672 | 1           | 0.725703394 |
|         | 1.443229843                                                                                                                       | 0.965850373 | 1           | 0.6717897   | 0.520792584 | 0.407830635 |
|         | 1.276760686                                                                                                                       | 1           | 1.389702854 | 2.530934502 | 3.039285076 | 1.50332961  |
|         | 1.18914821                                                                                                                        | 1.168424805 | 0.667228952 | 0.727851578 | 1.130014988 | 1           |
|         | 1.256932074                                                                                                                       | 1.733538605 | 1.323503283 | 0.971193668 | 2.015592684 | 1           |
|         | 1.232578864                                                                                                                       | 1.760319563 | 1.061784653 | 2.0400059   | 1.548908802 | 1.407127762 |

YJL110C YJL110C::GZF3::Dal80 homolog 1 0.617390469 0.800950687  
0.844296946 0.968714994 1 0.806756249 0.992648667 0.802535361  
0.837524564 1 0.724005279 0.704016653 0.658535484 0.855064069 1  
0.70185324 0.687214421 0.808092447 0.955099456 1 0.562488901  
0.798245459 0.915479968 0.778029968 1 0.939031957 0.899080484  
0.742928939 0.754224536 0.893229977 1 0.861239854 0.871456511  
0.943280637 1.002806651 1.115470194 1 0.822710798 0.983220609  
1.004246804 1.054925734 1.011207876 0.880002116  
YDL066W YDL066W::IDP1::Mitochondrial form of NADP-specific isocitrate  
dehydrogenase 1 1.236692641 1.266414721 1.794406023 1.176660815 1  
1.253666901 1.329940033 1.221980423 1.386100997 1 1.875930229  
2.077766133 1.534235036 1.203847583 1 1.32155911 1.062890669  
1.303898583 1 0.560952197 0.499306657 0.36322754 0.490760949  
1.527457437  
0.570906857  
YCL073C YCL073C::YCL073C::not yet annotated 1 1.158715049 0.958709396  
0.900666906 0.897227216 1 0.924101027 0.884746998 0.99308337  
1.125833067 1 1.132203486 1.010960442 1.089359691 0.903015597 1  
1.278724759 0.951900957 1.282738587 1.148896289 1 1.330144533  
1.361273385 1.127553997 1.064466774 1 1.087147894 0.892108141  
1.065612964 1.177215117 1.039151951 1 0.717923413 0.956300145  
0.674708745 0.752384957 0.771679039 1 0.994511441 0.971480548  
0.951638503 1.155762916 1.041558368 0.992957567  
YDL068w YDL068w::YDL068W::molecular\_function unknown 1 1.396267378  
1.405982154 1.221362015 1.809431808 1 1.503462665 1.210824194  
1.469151794 1 1.244146481 1.287612559 1.481337965 1.24664796 1  
1.233562984 0.878402888 0.889967518 1.054698234 1 1.115737536  
1.074547424 1.191982119 0.97134157 0.999744621 1.020724679  
0.674897751 0.679658031 1.034378604 1 0.519339941 1.274212406  
1.373613552 1.112296866 2.160829107 1 0.884541827 0.948714762  
0.953893037 1.140449365 1.781903926 0.887882787  
YER119CA YER119CA::YER119C-A::molecular\_function unknown 1 1.168198558  
0.959583507 0.901201269 0.583954031 1 1.165752736 1.130836834  
0.791593875 0.824042635 1 0.99776133 1.053201159 0.872682739  
0.811114964 1 0.684183656 0.356993327 0.732376942 0.771001013 1  
1.029621259 0.757013112 0.502075557 1 0.7033956 0.693031515  
1.024916186 1.023584923 0.82772041 1 0.944277839 0.749608722  
0.742116653 0.905809483 0.526458736 1 0.969268336 0.608470346  
1.010988402 0.626086756 1.024199626 0.682111082  
YDL070w "YDL070w::BDF2::bromodomain protein, homolog of BDF1" 1  
0.597800848 0.752392417 0.907610623 0.669063239 1 0.856723351  
0.764820224 0.706660013 1 0.508851145 0.817710723 0.666474202  
0.777776556 1 0.986886357 0.922217583 1.212657205 1.353834922 1  
1.348895683 1.414148386 1.438582895 0.965723419 1 0.998464576  
1.304796358 1.381357879 1.200319845 1.467788916 1 0.888167351  
0.817508532 1.496095858 0.854310342 0.779551871 1 1.100043403  
1.023333425 1.162257977 1.05322665 1.340472541 0.870370271  
YMR060C YMR060C::TOM37::Translocase of the Outer Mitochondrial membrane 1  
0.841000841 1.185749895 1.017495044 1.386813759 1 0.938956078  
1.117655479 1.440867054 1.235445422 1 0.807916073 0.972745042  
1.304710061 0.997220552 1 0.894633496 0.709125239 1.142676651  
1.481450224 1 1.790351199 1.162565004 1.17778129  
1.194680478 0.915355374 0.716501167 1.087006628 1 1.161804837  
1.368770413 0.93641179 0.996983327 1.475879506 1 1.380063959  
1.404554681 1.034468516 1.663759505 1.360438166 1.315187225  
YDL072c YDL072c::YDL072C::molecular\_function unknown 1 1.391117858  
1.701746054 1.191844582 1.855258671 1 1.332725899 1.277647233

1.666296374 1.622975629 1 1.374388378 1.732621217 2.832269833  
1.204165721 1 2.191297683 1.745271847 2.188769769 2.200967392 1  
1.901103332 3.127537977 3.03137236 1.270863513 1 1.513632607  
1.971916458 1.775971638 1.143782181 1.06598311 1 1.119645114  
2.251309435 2.308860024 0.973688762 1.401839454 1 1.468508834  
1.72971987 1.214917538 1.469856592 1.528348475 1.337077805  
YMR031WA YMR031WA::YMR031W-A::molecular\_function unknown 1 1.376951647  
1.452577664 2.085855184 1.381966123 1 1.626714812 1.974218635  
1.531119751 1 1.635499958 1.952556174 0.958327728 1.454981435 1  
0.864922038 0.71004262 1  
0.997972936 1.072426471 1.18294152 0.873149684 1.055154745 1  
1.351586495 1.020906825 1.209278317 0.6139665 1 1.293899696  
1.11594884 1.173127223 0.803284199 0.751951742 0.942171402  
YDL086w YDL086w::YDL086W::not yet annotated 1 1.124246547 1.128607061  
0.866539689 1.00237783 1 1.02245046 1.182426181 1.067904958  
1.091740121 1 1.080436236 1.151566274 1.834280288 0.865373178 1  
1.245093645 1.270393332 1.510903282 1.634978541 1 1.27189156  
1.650738369 1.977596564 1.17182331 1 1.25353236 1.129483229  
1.410154623 1.38471974 0.93478251 1 0.967791411 0.898600396  
1.11474586 0.941050403 1 0.816882459 0.777727599 0.874075962  
0.818878908 0.84652918 0.974569543  
YDL088C YDL088C::ASM4::Suppressor of thermosensitive mutations in the DNA  
polymerase delta gene 1 0.733826164 0.946554691 0.917119281 0.859906349 1  
0.901201221 0.852761359 0.789617344 1 0.813053706 0.87290431  
0.684624631 0.843418577 1 0.986379089 0.770497556 1.033325015  
1.003907507 1 1.0782964 1.000110256 1.031189655 1.04529353 1  
0.980942661 1.04633437 0.937666051 0.760934366 0.995758805 1  
1.111750036 0.944037889 1.372581033 0.766368697 1 1.084295519  
0.886043456 1.020411148 1.041491445 1.113051673 0.970191427  
YDL090C YDL090C::RAM1::essential for processing of ras proteins 1  
0.820854345 0.841796192 0.968176261 1.024726585 1 0.985926983  
0.990410747 0.881000651 1.017631484 1 0.892237435 0.853008655  
0.863785441 0.980267722 1 0.925634129 0.511780553 0.797352002  
0.826923802 1 1.267060794 1.45957215 1.190858777 1.222155239 1  
1.103889739 1.123631536 1.177540053 0.977261024 1.162165106 1  
1.057818986 0.865794555 1.392619062 0.945210262 0.693168472 1  
1.167560692 0.900285001 1.076452934 0.918979077 0.91801842 0.809076598  
YDL092W YDL092W::SRP14::Signal recognition particle subunit 1  
0.721637452 1.246240872 0.847317728 1.614814738 1 0.923018934  
1.254309272 1.36724781 1 0.696940864 1.072736318 1.235990173  
1.081421258 1 0.972296812 0.715723183 0.740341738 1.333503164 1  
1.472832845 1.896452975 2.054724906 1.293127014 1.322721544  
1.420178727 1.279337876 1 1.084625481  
1 1.133272624 1.29925695 1.147894392 1.747507235 1.363486737  
1.242510482  
YDL094c YDL094c::YDL094C::molecular\_function unknown 1 1.154905956  
1.213185714 1.038613446 1.317813743 1 1.075055821 1.02649922  
1.286472669 1.198790714 1 0.970468429 0.958431736 1.267462164  
1.079649887 1 0.864509381 0.635945558 0.725570923 0.984349486 1  
0.93415269 2.029467978 0.611049295 1 0.845767011 0.78869472  
0.648171035 0.746592935 0.80003261 1 0.79352621 0.771509013  
0.733604125 0.592288703 0.86048475 1 0.942626314 1.35584409  
0.933573954 1.425696918 1.043841263 1.330072903  
YDL096c YDL096c::YDL096C::molecular\_function unknown 1 1.074659442  
0.745713009 1.263516693 0.522393567 1 1.212953355 1.209578972  
0.623850556 0.683851191 1 1.222564957 0.936080045 0.398389124  
0.985056416 1 0.730363996 0.533198691 0.559251536 0.438298124 1

0.675764434 0.628898952  
 1.081265355 1 0.725233549 0.687968356 0.777886576 0.338514341  
 0.598051217  
 YJL112W YJL112W::MDV1::WD repeat protein that regulates steps in the Dnmlp-  
 dependent process of mitochondrial fission. 1 0.625515139 0.755337135  
 0.95008735 0.704951225 1 0.794641323 0.945473945 0.697286095 1  
 0.707738378 0.728669253 0.553157157 0.825060776 1 0.695092852  
 0.648781707 0.643331476 1.076073302 1 0.995449368 1.185126019  
 1.339601515 1.125469038 1.085339183 1.038212347 1.032553127  
 1.013184933 1.183650653 1 0.80994826 0.589306788 0.730977107  
 0.864041311 0.604500228 1 0.863024369 0.757018057 1.135802567  
 0.964859756 1.010019862 0.674230463  
 YJL114W YJL114W 1 1.218743318 1.716514281 1.373658132 1  
 1.649110348 1.553522575 1 1.544599805 1.665888081  
 1.667438155 1 0.870133016 1.858505895 1 0.818872246  
 2.779152317 1.191637965 1 0.692206587 0.893718284 0.864948582  
 1.03550064 0.993116799 1 0.454684401 0.473479055 0.783320582  
 0.836111162 0.57791427 1 0.785455425 0.750036456 0.610821761  
 0.97241752 0.563901851  
 YJL116C "YJL116C::NCA3::With NCA2, regulates proper expression of subunits 6  
 (Atp6p) and 8 (Atp8p ) of the Fo-F1 ATP synthase" 1 1.080077662  
 1.01251886 1.505183138 1.285205806 1 0.945319565 1.058928498  
 1.315235668 1.892061648 1 0.747619675 0.8346631 1.823409207  
 2.054273842 1 1.0261064 1.620954079 2.600114834 2.182382747 1  
 0.702277901 1.437455299 0.569894155 0.808049323 1 1.067491297  
 1.100109606 1.151931914 1.44335085 1.408426028 1 0.617248962  
 0.747119714 0.736724655 1.7947111 1.482723695 1 0.971158705  
 0.683382996 0.965782749 0.989648939 1.259184441 0.776678509  
 YJL118W YJL118W::molecular\_function unknown 1 1.087991455  
 1.477395531 1.037811631 1.078429184 1 1.258534305 1.247303141  
 1.015504613 0.983023544 1 1.373333053 1.772557557 2.351355978 1  
 2.285120447 1.668864582 3.450583371 2.878613866 1 1.714715259  
 3.513680893 3.294849316 1.192817042 1 1.249866916 1.422980522  
 1.068804609 0.959027526 0.928645147 1 1.482175839 0.814360281  
 1.048124837 0.895872158 1.186575781 1 2.188607438 1.05473086  
 1.0389706 1.260494371 1.209236781  
 YJL120W YJL120W::molecular\_function unknown 1 1.513811551  
 1.323147313 0.879871316 1 1.318681568 1.21733101 0.986864795  
 1 1.203959886 1.230268249 1.141609287 1.04130835 1 0.917433326  
 0.458103752 0.349436623 0.89903925 1 1.120949137 0.93931848  
 0.698968462 0.669297724 1 1.086064856 1.091104443 1.004316145  
 1.189444792 1.036515766 1 0.841614965 0.713793726 0.973606003  
 1.129750943 0.957887661 1 1.100729857 0.872440424 0.909507316  
 1.293947394 1.113442804 0.997335787  
 YJL134W YJL134W::LCB3::Protein involved in incorporation of exogenous long  
 chain bases in sphingolipids 1 1.170657589 0.970639849 0.882327049 1  
 1.113322014 0.984522384 0.8090736 0.887478027 1 1.071006025  
 0.825331221 0.873482669 0.722375307 1 1.289313343 0.818363392  
 1.028887044 0.832313654 1 0.881384934 1.236546048 0.850543024  
 0.625195788 1 0.959240767 0.882070082 0.922726625 0.98294496  
 0.78850646 1 0.854325597 0.904497165 1.296302459 0.840660227  
 0.629897966 1 1.051306014 0.987119183 0.849542586 0.915395117  
 0.786973721 0.991206341  
 YJL136C YJL136C::RPS21B::Homology to rat S21 1 0.954429269  
 1.224279635 0.691822956 1.682530341 1 0.963825114 0.843747813  
 1.236954607 1.080173037 1 0.757964688 0.804079312 0.740483193  
 0.837868473 1 0.845018416 0.347345155 0.215534975 0.731476336 1

|             |                                                            |             |             |             |             |
|-------------|------------------------------------------------------------|-------------|-------------|-------------|-------------|
| 1.410949036 | 1.03103574                                                 | 0.66392652  | 0.792758366 | 1           | 1.201335849 |
| 1.314086361 | 0.821984036                                                | 1.306152115 | 1.454622573 | 1           | 1.566508833 |
| 2.244326786 | 0.862344205                                                | 0.819954545 | 1.972395748 | 1           | 1.195660875 |
| 1.532979805 | 0.969974992                                                | 2.191669533 | 1.193750505 | 1.027106933 |             |
| YJL138C     | YJL138C::TIF2::translation initiation factor eIF4A         |             |             |             | 1           |
| 1.069097077 | 0.713082976                                                | 0.777366454 | 1.025368161 | 1           | 0.984164855 |
| 0.745285593 | 0.868928828                                                | 1           | 0.94799562  | 0.648653348 | 0.446121396 |
| 0.665759908 | 1                                                          | 1.034073402 | 0.627024108 | 0.45894915  | 0.846552938 |
| 0.828225428 | 0.415820352                                                | 0.457267751 | 0.709272516 | 1           | 1.175754271 |
| 1.216023342 | 1.241948427                                                | 1.541936324 | 1.24334988  | 1           | 0.923179105 |
| 0.763502806 | 0.826094496                                                | 0.479442255 | 0.509340248 | 1           | 1.049088068 |
| 0.706632888 | 0.800787161                                                | 0.816936052 | 0.667999757 | 0.820459668 |             |
| YJL140W     | YJL140W::RPB4::fourth-largest subunit of RNA polymerase II |             |             |             | 1           |
| 0.651082898 | 0.943117399                                                | 0.712236007 | 1.167525975 | 1           | 0.679609324 |
| 0.650501692 | 1.095132576                                                | 1.421226103 | 1           | 0.722846198 | 0.795930003 |
| 1.149325909 | 0.813939907                                                | 1           | 1.074357436 | 0.808857396 | 0.689825095 |
| 1.299379153 | 1                                                          | 1.974340337 | 2.282919632 | 1.838402234 | 1.478261905 |
| 0.818590508 | 0.989214015                                                | 0.723908122 | 0.679977208 | 0.848294411 | 1           |
| 1.020453692 | 1.349207948                                                | 1.377139196 | 1.160931747 | 1.588771716 | 1           |
| 1.105692108 | 1.192448876                                                | 1.008622287 | 1.167159199 | 1.262176045 | 1.063007524 |
| YJL142C     | YJL142C::YJL142C::molecular_function unknown               |             |             |             | 1           |
| 1.810637612 | 0.905879804                                                | 1.641882922 | 1           | 1.132899675 | 1.293429326 |
| 1.259268564 | 1                                                          | 1.373515713 | 1.518136779 | 3.169145786 | 1.055794921 |
| 1.407339896 | 1.056055088                                                | 1.147342835 | 1.548345342 | 1           | 1.957217645 |
| 3.624719875 | 3.780724584                                                | 1.297630577 | 1           | 1.092556963 | 0.983829821 |
| 0.720533078 | 0.704472098                                                | 0.976249588 | 1           | 1.20864781  | 1.387527726 |
| 1.444680841 | 0.795760893                                                | 1.558892885 | 1           | 1.289711285 | 1.526787237 |
| 0.885297586 | 1.661474816                                                | 1.38612582  | 1.187346097 |             |             |
| YMR062C     | YMR062C::ECM40::ExtraCellular Mutant                       |             |             |             | 1           |
| 1.26123224  | 0.917714168                                                | 0.579921316 | 1           | 0.921979493 | 0.958072054 |
| 0.814466828 | 0.735037508                                                | 1           | 2.334061946 | 2.560764413 | 0.687218532 |
| 0.51689696  | 1                                                          | 2.039653812 | 1.356682774 | 0.670611873 | 0.704435018 |
| 3.340889787 | 2.316554616                                                | 1.18557473  | 1.012904994 | 1           | 0.973392321 |
| 1.048594735 | 1.193869231                                                | 1.112613774 | 0.928898883 | 1           | 1.406347576 |
| 1.634144266 | 1.414277384                                                | 0.953995987 | 0.906811028 | 1           | 2.194526147 |
| 2.250147558 | 1.604632927                                                | 1.226293563 | 1.03144994  | 1.447406469 |             |
| YMR033W     | YMR033W::ARP9::involved in transcriptional regulation      |             |             |             | 1           |
| 0.721006121 | 0.875943175                                                | 0.962235226 | 0.756159492 | 1           | 0.855852907 |
| 0.95588748  | 0.934473311                                                | 0.853809767 | 1           | 0.747913283 | 0.864891763 |
| 0.678607714 | 0.935123158                                                | 1           | 0.780797069 | 0.567426536 | 0.758678878 |
| 0.964802301 | 1                                                          | 1.042047318 | 0.59454082  | 0.863598185 | 0.660586673 |
| 0.808595529 | 0.944718765                                                | 0.955615382 | 0.810911845 | 0.955336832 | 1           |
| 1.134047895 | 0.756909942                                                | 0.775438756 | 1.017232298 | 0.686472955 | 1           |
| 1.093890354 | 0.891991536                                                | 1.129534998 | 0.685759135 | 1.051479186 | 0.824837783 |
| YDL110c     | YDL110c::YDL110C::molecular_function unknown               |             |             |             | 1           |
| 1.977473952 | 1.415048749                                                | 1.911760807 | 1           | 1.276495843 | 1.686679418 |
| 1.913070062 | 1.735339515                                                | 1           | 1.243989012 | 2.325566193 | 4.699568172 |
| 1.706721958 | 1                                                          | 3.129741723 | 2.265179615 | 3.178781701 | 3.560823568 |
| 3.437933209 | 4.038193208                                                | 6.329384578 | 2.6951426   | 1           | 1.15217865  |
| 1.894453669 | 1.435405675                                                | 0.85781107  | 1.192017227 | 1           | 1.458741044 |
| 2.239843291 | 1.61722546                                                 | 2.020612624 | 1           | 1.557110879 | 1.823628661 |
| 2.062304764 | 3.045852057                                                | 1.706591177 |             |             |             |
| YDL112w     | YDL112w::TRM3::Trna ribose methylase                       |             |             |             | 1           |
| 0.741728442 | 1.206752219                                                | 0.817659714 | 1           | 1.151347469 | 1.00903764  |
| 0.761940952 | 0.770313747                                                | 1           | 0.903140282 | 0.707884315 | 0.358536475 |
| 1.055689666 | 0.841367249                                                |             | 0.954328648 | 0.860937156 | 1           |
| 0.479024092 | 0.63649614                                                 |             | 0.355065857 | 1           | 0.825509212 |
|             |                                                            |             |             | 0.630913985 |             |

|         |                                                                                                                  |             |             |             |             |             |             |
|---------|------------------------------------------------------------------------------------------------------------------|-------------|-------------|-------------|-------------|-------------|-------------|
|         | 0.792323437                                                                                                      | 0.974173177 | 0.825207542 | 1           | 0.984550595 | 0.646166263 |             |
|         | 0.761062446                                                                                                      | 1.009992589 | 0.510013002 | 1           | 0.769171588 | 0.71922957  |             |
|         | 0.930317358                                                                                                      | 0.831771558 | 0.589967629 | 0.748658537 |             |             |             |
| YDL114w | YDL114w::YDL114W::molecular_function unknown                                                                     |             |             |             |             |             | 1           |
|         | 1.104934597                                                                                                      | 3.128582226 |             | 1           | 0.444374685 | 2.32280152  |             |
|         |                                                                                                                  |             | 1.058300381 |             | 0.85530924  | 1.722091744 |             |
|         | 1.778381179                                                                                                      | 1.089052929 |             | 1           |             |             |             |
|         | 0.746031646                                                                                                      |             |             |             |             |             |             |
| YDL116W | "YDL116W::NUP84::component of nuclear pores; Part of complex with Nup120p, Nup85p, Sec13p, and a Sec13p homolog" |             |             |             |             |             | 1           |
|         | 0.988611307                                                                                                      | 0.87270441  | 1           | 1.052790433 | 0.963118304 | 0.812515502 |             |
|         | 0.711564426                                                                                                      | 1           | 0.841034425 | 0.861397729 | 0.504272669 | 1.015661333 |             |
|         | 0.734198871                                                                                                      | 0.490956457 | 0.662760292 | 0.642170914 | 1           | 0.597135593 |             |
|         | 0.680073196                                                                                                      | 0.845872354 | 0.64976865  | 1           | 0.935496015 | 0.788089557 |             |
|         | 0.740065138                                                                                                      | 0.859970402 | 0.928983898 | 1           | 1.042506627 | 0.746323821 |             |
|         | 0.82057398                                                                                                       | 0.878562313 | 0.833275463 | 1           | 0.901194374 | 0.714549196 |             |
|         | 0.927645629                                                                                                      | 0.831882214 | 0.971578813 | 1.016599476 |             |             |             |
| YDL118w | YDL118w::YDL118W::molecular_function unknown                                                                     |             |             |             |             | 1           | 0.985620949 |
|         | 0.935425851                                                                                                      | 1.341965181 | 0.998150774 | 1           | 1.305105103 | 1.169488906 |             |
|         | 1.040195748                                                                                                      | 0.979537536 | 1           | 1.088541114 | 1.171611714 | 1.003607862 |             |
|         | 1.124289967                                                                                                      | 1           | 0.904371955 | 0.831162448 | 1.176694789 | 0.755651856 |             |
|         | 0.76035343                                                                                                       | 1.270565571 | 1.137958331 | 0.692008047 | 1           | 0.91168941  |             |
|         | 0.886262998                                                                                                      |             | 1.015762126 | 1           | 0.648373887 | 0.482503397 |             |
|         | 0.799438358                                                                                                      | 0.768699748 | 0.434770928 | 1           | 0.844001342 | 0.568538773 |             |
|         | 0.916732568                                                                                                      | 0.746031646 |             |             |             |             |             |
| YDL120w | YDL120w::YFH1::Yeast Frataxin Homologue                                                                          |             |             |             |             | 1           | 1.064345603 |
|         | 1.445723115                                                                                                      | 1.058260487 | 1.699887543 | 1           | 1.074075276 | 1.064504334 |             |
|         | 1.529900653                                                                                                      | 1.347784579 | 1           | 1.007176443 | 1.093166193 | 1.83297773  |             |
|         | 1.286060348                                                                                                      | 1           | 0.79078778  | 0.752850952 | 0.953894856 | 1.612527424 |             |
|         | 1.148761146                                                                                                      | 1.581957549 | 2.408636535 | 1.190185217 | 1           | 0.810874164 |             |
|         | 0.526280813                                                                                                      | 0.360190248 | 0.742428034 | 0.75433728  | 1           | 0.812511087 |             |
|         | 0.719978525                                                                                                      | 0.606900989 | 0.753425645 | 1.821121938 | 1           | 0.879317067 |             |
|         | 0.685148575                                                                                                      | 0.859607253 | 1.341258035 | 1.529134659 | 1.203983    |             |             |
| YDL134C | YDL134C::PPH21::serine-threonine protein phosphatase 2A                                                          |             |             |             |             | 1           |             |
|         | 1.121256065                                                                                                      | 0.959178895 | 1.189345834 | 0.99561648  | 1           | 1.220803784 |             |
|         | 1.149248623                                                                                                      | 0.891629795 | 1.001890486 | 1           | 1.028539268 | 1.082591824 |             |
|         | 1.021016328                                                                                                      | 1.095519323 | 1           | 1.583554272 | 1.359290935 | 1.542567844 |             |
|         | 1.064506601                                                                                                      | 1           | 0.86730954  | 0.595055762 | 0.936109106 | 0.987573519 |             |
|         | 1.126430713                                                                                                      | 0.98335382  | 1.090879546 | 0.956955972 | 0.959225417 | 1           |             |
|         | 1.030481372                                                                                                      | 1.001134095 | 1.253330379 | 0.84642524  | 0.938182622 | 1           |             |
|         | 1.238450506                                                                                                      | 1.124720535 | 1.088448147 | 1.076897151 | 1.153586448 | 0.822210945 |             |
| YDL136w | YDL136w::RPL35B::Homology to rat L35                                                                             |             |             |             |             | 1           | 0.946733625 |
|         | 1.362404426                                                                                                      | 0.900357451 | 1.77098268  | 1           | 0.908935505 | 0.932322572 |             |
|         | 1.605972889                                                                                                      | 1.377266176 | 1           | 0.906569596 | 0.94647408  | 1.006045566 |             |
|         | 1.078733103                                                                                                      | 1           | 0.729007913 | 0.303232965 | 0.199153034 | 0.458228657 |             |
|         | 1.601685263                                                                                                      | 1.292501989 | 0.938672285 | 0.903208838 | 1           | 0.816810434 |             |
|         | 0.895070063                                                                                                      | 0.550151663 | 0.618804005 | 0.91218081  | 1           | 1.479708249 |             |
|         | 1.918575501                                                                                                      | 1.212236416 | 1.126817186 | 2.503921468 | 1           | 1.123240721 |             |
|         | 1.473081904                                                                                                      | 1.053688115 | 1.684582928 | 1.224283627 | 1.147943055 |             |             |
| YDL140C | YDL140C::RPO21::RNA polymerase II large subunit                                                                  |             |             |             |             | 1           | 1.047459412 |
|         | 0.803770423                                                                                                      | 1.224754341 | 0.485667781 | 1           | 1.220896014 | 1.334183648 |             |
|         | 0.676524432                                                                                                      | 0.636861621 | 1           | 1.204452711 | 1.10897552  | 0.398437862 |             |
|         | 0.869546699                                                                                                      | 1           | 1.256604032 | 1.132976699 | 0.4676454   | 1           |             |
|         | 0.489446225                                                                                                      | 0.598844831 | 0.351197492 | 0.524206853 | 1           | 0.895126237 |             |
|         | 0.827081302                                                                                                      | 1.030823399 | 1.034660985 | 0.830746843 | 1           | 0.88217827  |             |

|         |                                                                            |             |             |             |             |             |             |
|---------|----------------------------------------------------------------------------|-------------|-------------|-------------|-------------|-------------|-------------|
|         | 0.560239072                                                                | 0.703645738 | 0.630735746 | 0.460121114 | 1           | 0.740288673 |             |
|         | 0.633072689                                                                | 0.869654029 | 0.578083332 | 0.647842213 | 0.735524137 |             |             |
| YDL142c | YDL142c::CRD1::Cardiolipin synthase                                        | 1           | 0.964305954 | 1.071532677 |             |             |             |
|         | 0.750153125                                                                | 1.010152259 | 1           | 0.887537693 | 0.817411766 | 1.144648433 |             |
|         | 0.986463032                                                                | 1           | 1.039306412 | 1.11790873  | 1.37277727  | 0.873000169 | 1           |
|         | 1.033167045                                                                | 1.262904248 | 1.35840244  | 1           | 2.17278477  | 2.589460756 |             |
|         | 2.303078888                                                                | 2.10885678  | 1           | 1.304836982 | 1.357547705 | 1.282726037 |             |
|         | 0.99449059                                                                 | 0.89015932  | 1           | 1.287045059 | 1.40471995  | 1.408419247 |             |
|         | 0.988492709                                                                | 1.456188072 | 1           | 1.528785052 | 1.496726139 | 1.075896186 |             |
|         | 1.084082351                                                                | 1.146077965 | 1.403625311 |             |             |             |             |
| YJL144W | YJL144W::YJL144W::molecular_function unknown                               | 1           | 1.373182302 |             |             |             |             |
|         | 1.858840069                                                                | 3.038876912 | 1.252742948 | 1           | 2.146496095 | 1.910330123 |             |
|         | 2.729264919                                                                | 1           | 1.397111627 | 2.872549002 | 4.402752149 | 2.235978425 | 1           |
|         | 0.815316583                                                                | 1.873466338 | 1.914674745 | 0.89508917  | 1           | 0.724338948 |             |
|         | 0.414962213                                                                | 0.488423617 | 0.403426816 | 1           | 1.61636778  | 1.608852541 |             |
|         | 1.370274722                                                                | 2.726631609 | 2.008487126 | 1           | 0.908319798 | 0.324989138 |             |
|         | 0.763024981                                                                | 1.316445062 | 0.289909992 | 1           | 0.527635345 | 0.323954647 |             |
|         | 0.446958248                                                                | 0.226577039 | 0.500757224 | 0.364259592 |             |             |             |
| YJL158C | YJL158C::CIS3::cik1 suppressor                                             | 1           | 1.628295009 | 1.26220281  |             |             |             |
|         | 0.604755723                                                                | 0.88347119  | 1           | 1.235246049 | 1.230887253 | 0.659618983 |             |
|         | 0.859244245                                                                | 1           | 1.241161737 | 1.068301781 | 1.343054534 | 0.702980643 | 1           |
|         | 0.783234737                                                                | 0.630339752 | 0.712328836 | 0.861952303 | 1           | 0.595380903 |             |
|         | 0.680055542                                                                | 0.508145399 | 0.665563466 | 1           | 0.81174412  | 0.615129622 |             |
|         | 0.679173095                                                                |             | 0.687317614 |             | 0.709678438 | 0.731432639 |             |
|         |                                                                            | 1.057872949 |             |             | 0.605860918 | -12.258736  |             |
| YJL158C | YJL158C::CIS3::cik1 suppressor                                             |             |             |             |             |             |             |
|         |                                                                            |             |             | 1           | 1.367829968 | 1.049650907 |             |
|         | 1.181552545                                                                | 1.506265771 | 1.116980423 | 1           | 0.923344031 | 1.056358992 |             |
|         | 0.852120529                                                                | 0.988547662 | 0.68839496  | 1           | 0.848433453 | 0.778063734 |             |
|         | 0.776428281                                                                | 0.860627955 | 0.832814054 | 2.284502988 |             |             |             |
| YJL160C | YJL160C::YJL160C::molecular_function unknown                               | 1           | 1.602498348 |             |             |             |             |
|         | 1.713239709                                                                |             | 1.688539427 | 1           | 1.713406723 | 1.544809093 | 1.608548453 |
|         | 1.753453689                                                                | 1           | 1.495293161 | 1.709648454 | 1.946056993 | 1.721112355 | 1           |
|         | 1.27546891                                                                 | 1.524477739 | 1.666512224 |             | 1           | 0.953479457 | 1.583545497 |
|         | 0.771006062                                                                | 1           | 0.742686394 | 0.832452432 | 0.753720413 | 0.932323982 |             |
|         | 0.977696038                                                                | 1           | 0.626966192 | 0.759198136 | 0.79057596  | 0.732534826 |             |
|         | 1.193493409                                                                | 1           | 1.067911494 | 1.166087071 |             | 0.989331756 | 1.812083521 |
| YJL162C | YJL162C::YJL162C::molecular_function unknown                               | 1           | 0.71273133  |             |             |             |             |
|         | 0.865725979                                                                | 0.960449255 | 1.069156823 | 1           | 0.763562454 | 0.875891222 |             |
|         | 0.817381564                                                                | 0.93287596  | 1           | 0.776941583 | 0.721867661 |             | 0.905909001 |
|         | 0.795997103                                                                | 0.686773627 | 0.826014167 | 0.860743465 | 1           | 1.011686737 |             |
|         | 1.388523364                                                                | 0.91444233  | 0.7961092   | 1           | 1.036302637 | 1.085689107 |             |
|         | 1.048999855                                                                | 0.950675945 | 1.280380042 | 1           | 1.255389169 | 1.251301236 |             |
|         | 1.253440823                                                                | 1.062402639 | 1.351647932 | 1           | 0.923057289 | 1.135461635 |             |
|         | 0.932765322                                                                | 1.25054422  | 0.882162209 | 0.83446968  |             |             |             |
| YJL164C | YJL164C::TPK1::putative catalytic subunit of cAMP-dependent protein kinase | 1           | 1.270677637 | 1           |             |             |             |
|         | 1.378870662                                                                | 1.409654005 | 1.486152791 | 1.084196847 | 1           | 1.385854459 |             |
|         | 2.109118949                                                                | 2.413817648 | 1.138311596 | 1           | 2.594974975 | 1.978072441 |             |
|         | 2.060243953                                                                | 1.800348773 | 1           | 2.693179861 | 2.907636736 | 2.265954807 |             |
|         | 1.455235834                                                                | 1           | 1.127452352 | 1.629890721 | 1.75785045  | 1.199424212 |             |
|         | 1.241580615                                                                | 1           | 1.364947082 | 1.348395698 | 2.401732571 | 1.272190028 | 1           |
|         | 2.084442534                                                                | 1.63670058  | 1.34406463  | 1.342530121 | 1.887487534 | 0.943047067 |             |
| YJL166W | YJL166W::QCR8::Ubiquinol cytochrome-c reductase subunit 8 (11 kDa protein) | 1           | 1.328817549 | 2.262307733 | 1.315743997 | 2.645328285 | 1           |
|         | 1.53273905                                                                 | 1.646469076 | 2.207307015 | 1.939203082 | 1           | 0.932509997 |             |



1.232399385 2.325265849 1.210242239 1 0.975996336 0.437717087  
0.868166402 1.945577042 1 1.971657366 1.795740714 3.247599979  
2.021338202 1 0.561475738 0.339114353 0.234843738 0.781835463 1  
0.648068944 0.289399901 0.269243545 0.484922414 2.019717589 1  
0.549160662 0.297029585 0.506878085 2.282924096 1.77995679 0.993833232  
YJL168C YJL168C::SET2::Contains a 'SET' or 'TROMO' domain at the N-terminus  
of the protein<br> Methyltransferase activity is important for transcriptional  
repression activity 1 0.887232947 0.994819342 1.156563107 1.000691242 1  
1.136564788 1.039692999 0.855700838 0.787266258 1 1.014411022  
1.034298381 0.560681402 0.959015345 1 0.967504805 1.146163595  
0.988589262 0.746894151 1 0.77222991 0.902284665 0.574594147  
0.638218743 1 0.973537612 0.979236183 1.066387033 1.147055754  
1.09371043 1 0.93154187 0.879918787 0.921483876 0.984197702 1  
0.917783675 1.046611674 1.151177127 1.045232575 0.911480818 1.157574951  
YJL182C YJL182C::YJL182C::molecular\_function unknown 1 1.832327616  
1.930041239 1.70621252 1 1.803761895 1  
1.301162359 1.120160249 1 0.819703304  
0.797474162 1 0.733553346 0.625061927  
0.850407537 1 0.726981292 0.626645473 0.540644936  
1.796216987 0.498825176 0.403734298 0.733011782 0.914103562  
0.473712592  
YJL184W YJL184W::YJL184W::molecular\_function unknown 1 1.029990731  
1.677091384 1.167224727 1.674882239 1 0.975470435 1.131202728  
1.659764715 1.64237088 1 1.314298617 1.391665211 1.573534735  
1.397821474 1 0.875358834 0.535170893 0.613319698 1.014089967 1  
1.943444254 2.309505841 1.57897264 1.107510646 1 1.221006309  
1.313304957 1.040198573 0.942393096 1.150460112 1 1.34036731  
1.701432752 1.435133399 1.924272572 1 0.892139214 1.181417215  
1.275538207 1.57224607 1.082747571 1.408878988  
YJL186W YJL186W::MNN5::mannan synthesis 1 1.517029795 1.18651548  
1.488582643 1.301947709 1 1.476682584 1.230669013 1.272739193  
1.33190211 1 1.093296495 0.991232886 0.975940128 1.167054735 1  
0.702069491 0.57245295 0.634945848 0.8563765 1 0.590721052  
0.652517056 0.855706299 0.633488231 1 1.050049962 0.983428706  
1.127750684 1.069729647 1.177979349 1 0.840428738 0.89326169  
0.917778772 0.571723901 1 0.748655788 0.651109156 0.840931871  
0.687929098 0.730450593 1.405376537  
YDL144c YDL144c::YDL144C::molecular\_function unknown 1 0.991502932  
1.204125637 0.948325093 0.657434586 1 1.093572477 1.221905551  
1.146734528 1.062227184 1 1.171411395 1.288936531 1.418054178  
1.012150238 1 1.057323666 0.931381318 1.263133081 1.05697857 1  
1.176166784 1.131060339 1.186981434 1.394980902 1 0.963775033  
1.172992246 1.436614191 0.989817236 0.761017045 1 1.030316289  
1.179439709 1.127514173 0.992568439 0.840541037 1 0.76661289  
1.153392127 1.047226213 0.765399617 0.788013303 0.938668951  
YDL158c YDL158c::YDL158C::molecular\_function unknown 1 1.611464674  
1.971939162 1.388178897 2.376220187 1 1.24251664 1.184215244  
2.194982034 2.052589329 1 1.130704135 1.43715396 1.724760736  
1.87204068 1 0.928422909 0.569225305 0.689623518 1.617103134 1  
1.580984739 2.037057742 1.169529166 0.942012763 1 0.733491313  
0.850496274 0.675099419 0.635069629 0.959072216 1 0.907286032  
1.474287483 1.258591404 1.017243244 1.696830607 1 1.027351932  
1.616265155 1.263211471 1.833509025 1.146348595 2.469259622  
YDL160C YDL160C::DHH1::Putative RNA helicase of DEAD box family 1  
1.190881864 0.904457664 1.481799446 0.587225228 1 1.316246327  
1.249268949 0.890889167 0.867663787 1 1.325282069 1.138095974  
0.722688209 1.092534448 1 1.132831343 0.873246924 1

|             |                                                                                                                                          |             |             |             |             |             |
|-------------|------------------------------------------------------------------------------------------------------------------------------------------|-------------|-------------|-------------|-------------|-------------|
| 0.356167902 | 0.634425913                                                                                                                              | 0.44359541  | 0.541483953 | 1           | 0.743007131 |             |
| 0.676356511 | 0.854723918                                                                                                                              | 0.985691746 | 0.650856251 | 1           | 0.849130472 |             |
| 0.474642444 | 0.723245122                                                                                                                              | 0.850064785 | 0.337896073 | 1           | 0.733791103 |             |
| 0.653886039 | 0.942549818                                                                                                                              | 0.571333679 | 0.750568096 | 0.764419775 |             |             |
| YDL162c     | YDL162c::YDL162C::molecular_function                                                                                                     | unknown     |             | 1           | 1.304723999 |             |
| 1.228760699 | 1.360686376                                                                                                                              | 1.250633673 | 1           | 1.239237737 | 1.233201508 |             |
| 1.298549481 | 1                                                                                                                                        | 1.027315309 | 1.251698359 | 0.909866531 | 1.340262507 | 1           |
|             | 0.86261416                                                                                                                               |             | 0.467995146 |             |             | 1           |
| 1.133154334 | 1.300518065                                                                                                                              | 1.044912039 | 1           | 0.941297814 | 0.654689836 |             |
| 0.889892534 | 1                                                                                                                                        | 0.850597237 |             |             | 0.913023971 |             |
| 0.80995221  |                                                                                                                                          |             |             |             |             |             |
| YDL164C     | "YDL164C::CDC9::essential for mitosis and meiosis, dispensable for intragenic recombination, but required for haploidization and spores" |             |             | 1           |             |             |
| 1.013444765 | 0.929449331                                                                                                                              | 1.23446899  | 0.747659235 | 1           | 1.238467446 |             |
| 1.233294285 | 1.068278245                                                                                                                              | 0.940141554 | 1           | 0.958933035 | 0.863258535 |             |
| 0.738705882 | 1.212549805                                                                                                                              | 1           | 0.665761051 | 0.431302466 | 0.737614625 |             |
| 0.747088991 | 1                                                                                                                                        | 0.679591761 | 0.782216765 | 0.533432297 | 0.817480673 | 1           |
| 0.828597858 | 0.805825171                                                                                                                              | 1.036440607 | 0.958176866 | 0.896603371 | 1           |             |
| 1.010120068 | 0.823501558                                                                                                                              | 0.851307151 | 0.948050608 | 0.709651339 | 1           |             |
| 0.897063193 | 0.726527025                                                                                                                              | 0.86093306  | 0.565411818 | 0.846350329 | 0.767922225 |             |
| YDL166c     | YDL166c::FAP7::Nuclear protein involved in oxidative stress response                                                                     |             |             |             |             |             |
| 1           | 0.847386268                                                                                                                              | 1.118588711 | 0.938117492 | 1.225169893 | 1           | 0.931035113 |
| 0.722796247 | 1.310005944                                                                                                                              | 1.217016675 | 1           | 0.853102884 | 0.824763262 |             |
| 0.834426401 | 1.248391464                                                                                                                              |             | 0.6179954   | 0.704938997 | 0.508903527 | 1           |
| 1.198963634 | 1.130224003                                                                                                                              | 1.317371827 |             | 1           | 0.941827727 | 1.056844602 |
| 0.620645951 | 0.681007011                                                                                                                              | 0.86507737  | 1           | 0.98681952  | 1.514262143 |             |
| 1.028028107 | 1.929322012                                                                                                                              | 1           |             | 1.148423616 | 1.504564838 | 1.105848931 |
| 1.794136622 | 1.235113031                                                                                                                              | 1.482431396 |             |             |             |             |
| YDL168W     | YDL168W::SFA1::Long-chain alcohol dehydrogenase (glutathione-dependent formaldehyde dehydrogenase)                                       |             |             | 1           | 1.104336807 | 1.032982206 |
| 1.006272106 | 0.870069675                                                                                                                              | 1           | 1.042806313 | 0.980667058 | 1.226095734 |             |
| 1.310350253 | 1                                                                                                                                        | 1.488356958 | 1.401482067 | 1.070660306 | 1.230466845 | 1           |
| 1.205886949 | 1.123470072                                                                                                                              | 1.005861345 | 1.477259491 | 1           | 1.940647512 |             |
| 1.331281982 | 1.220158482                                                                                                                              | 1.538831802 | 1           | 1.296116546 | 1.336176305 |             |
| 1.462535657 | 1.116182035                                                                                                                              | 0.84180222  | 1           | 1.254455384 | 1.526978557 |             |
| 1.251406996 | 0.854700113                                                                                                                              | 0.66098678  | 1           | 1.058272283 | 1.535829845 |             |
| 1.069812203 | 0.649204256                                                                                                                              | 0.647397762 | 1.225873579 |             |             |             |
| YDL182w     | "YDL182w::LYS20::homocitrate synthase, highly homologous to YDL131W"                                                                     |             |             |             |             |             |
| 1           | 1.361191715                                                                                                                              | 1.015403562 | 0.909613937 | 0.527741922 | 1           | 1.00148301  |
| 0.930006715 | 0.780261561                                                                                                                              | 0.761105147 | 1           | 2.810481874 | 1.932666291 |             |
| 0.676739496 | 1.021086739                                                                                                                              | 1           | 2.486768671 | 4.793445957 | 4.63673335  |             |
| 1.624454623 | 1                                                                                                                                        | 1.973114938 | 2.690186241 | 3.287356377 | 3.159638432 | 1           |
| 1.374149531 | 1.029251845                                                                                                                              | 1.235975224 | 1.221615816 | 0.901228682 | 1           |             |
| 1.22234831  | 1.389943936                                                                                                                              | 1.062187133 | 0.788007275 | 0.859320777 | 1           |             |
| 1.71718776  | 1.508845238                                                                                                                              | 1.972761038 | 0.927478115 | 0.691239748 | 1.485058286 |             |
| YDL184C     | YDL184C::RPL41A::Homology to human L41                                                                                                   |             |             | 1           | 1.128891619 |             |
| 2.057628152 | 1.068343948                                                                                                                              | 2.355675307 | 1           | 1.085645748 | 1.139835479 |             |
| 2.558629855 | 1.435587995                                                                                                                              | 1           | 0.939362121 | 1.49015604  | 1.944586239 |             |
| 1.131010336 | 1                                                                                                                                        | 0.707525809 | 0.441027487 | 0.363006274 | 0.474170686 | 1           |
| 2.313144655 | 1.830200366                                                                                                                              | 0.977599028 | 0.875749173 | 1           | 0.894591552 |             |
| 0.952129215 | 0.546373847                                                                                                                              | 0.673523539 | 1.277138516 | 1           | 1.435084551 |             |
| 2.610926125 | 1.40764757                                                                                                                               | 1.588958985 | 3.368380013 | 1           | 1.172049393 |             |
| 2.422652964 | 1.700717522                                                                                                                              | 3.089552336 | 2.129732356 | 1.261774171 |             |             |
| YDL186w     | YDL186w::YDL186W::molecular_function                                                                                                     | unknown     |             | 1           | 1.986228617 |             |
| 1.761331067 | 1.340571936                                                                                                                              | 2.198612503 | 1           | 1.557390453 | 1.586095219 |             |
| 1.840981557 | 1                                                                                                                                        | 1.642465246 | 1.348510304 | 2.291369788 | 1.912199444 |             |
| 0.497933084 |                                                                                                                                          | 1           |             | 1.696880003 | 1.685632475 | 1           |

|          |                                                                                                                                                        |             |             |             |             |             |             |
|----------|--------------------------------------------------------------------------------------------------------------------------------------------------------|-------------|-------------|-------------|-------------|-------------|-------------|
|          | 0.914420501                                                                                                                                            | 0.843787056 | 0.543564234 | 0.802444738 | 0.855903626 | 1           | 0.942143    |
|          | 1.310687214                                                                                                                                            | 0.843570459 | 0.765304094 | 1.846331666 | 1           | 0.924696811 |             |
|          | 1.211900151                                                                                                                                            | 0.868386518 |             | 1.210713119 | 1.323943457 |             |             |
| YJL188C  | YJL188C::BUD19                                                                                                                                         | 1           | 0.893599163 | 1.766873205 | 0.802420884 |             |             |
|          | 2.183041795                                                                                                                                            | 1           | 0.885223697 | 0.932228205 | 1.770984651 | 1.322868563 | 1           |
|          | 0.734853025                                                                                                                                            | 1.159309797 | 1.159200327 | 1.012158233 | 1           | 0.554963894 |             |
|          | 0.273587345                                                                                                                                            | 0.159069684 | 0.680581083 | 1           | 1.643501555 | 1.758835715 |             |
|          | 0.862309467                                                                                                                                            | 0.656968316 | 1           | 0.514677675 | 0.629323426 | 0.285466881 |             |
|          | 0.347552073                                                                                                                                            | 0.902013468 | 1           | 2.065703691 | 2.944771427 | 1.395504021 |             |
|          | 1.740653481                                                                                                                                            | 3.479087486 | 1           | 0.9712176   | 1.781799636 | 1.405349807 |             |
|          | 3.101217188                                                                                                                                            | 1.877003961 |             |             |             |             |             |
| YJL190C  | YJL190C::RPS22A::Homology to rat S15a                                                                                                                  | 1           |             |             | 1.658242486 |             |             |
|          | 1.680641659                                                                                                                                            | 0.959606647 | 1.768316586 | 1           | 1.432220077 | 1.213336921 |             |
|          | 1.732562403                                                                                                                                            | 1.305833633 | 1           | 1.118581807 | 1.114748547 | 1.019818196 |             |
|          | 0.945202948                                                                                                                                            | 1           | 0.603291989 | 0.212564955 | 0.138533651 | 0.499466285 | 1           |
|          | 0.896529847                                                                                                                                            | 0.71660661  | 0.3263899   | 0.526582149 | 1           | 1.165671064 |             |
|          | 1.079062425                                                                                                                                            | 0.666687576 | 1.086013767 | 1.023183591 | 1           | 1.294252757 |             |
|          | 1.804358558                                                                                                                                            | 0.975911674 | 0.580473627 | 1.445330609 | 1           | 1.047251863 |             |
|          | 1.126843972                                                                                                                                            | 0.962749424 | 1.872294661 | 1.163257738 | 2.006930256 |             |             |
| YJL192C  | YJL192C::YJL192C::molecular_function unknown                                                                                                           |             |             |             |             |             | 0.919771363 |
|          | 0.952051877                                                                                                                                            | 0.837491368 | 1.242311713 |             | 0.881409966 | 0.827081669 |             |
|          | 1.049384154                                                                                                                                            | 1.027152549 |             | 0.69926654  | 0.841942736 | 0.980426858 |             |
|          | 0.997589843                                                                                                                                            | 1           | 0.887849906 | 0.597542386 | 0.612053538 | 0.964236731 | 1           |
|          | 1.198364576                                                                                                                                            | 0.802368429 | 1.231444007 | 1.158951649 | 1           | 1.078405676 |             |
|          | 1.298894291                                                                                                                                            | 1.062885673 | 1.059506916 | 1.170798429 | 1           | 1.140908823 |             |
|          | 1.353982836                                                                                                                                            | 1.264194531 | 1.113295817 | 1.058723668 | 1           | 0.910670296 |             |
|          | 0.925425082                                                                                                                                            | 0.875693496 | 1.083265383 | 0.788934944 | 1.784521806 |             |             |
| YJL206CA | YJL206CA                                                                                                                                               | 1           | 1.525561541 | 1.69248303  | 1.503580718 | 1.772992799 | 1           |
|          | 1.424802287                                                                                                                                            | 1.531644509 | 1.534538254 | 1.696947633 | 1           | 1.332589858 |             |
|          | 1.27268979                                                                                                                                             | 1.687644974 | 1.451905352 | 1           | 1.103494761 | 0.638650543 |             |
|          | 1.058434743                                                                                                                                            | 1.055489733 | 1           | 0.866286891 | 1.607742853 | 1.128057397 |             |
|          | 0.656521576                                                                                                                                            | 1           | 1.149052056 | 1.017927028 | 0.657282663 | 1.094315965 |             |
|          | 1.019726304                                                                                                                                            | 1           | 0.98465358  | 1.354640431 | 0.875438009 | 0.7407954   |             |
|          | 1.152211313                                                                                                                                            | 1           | 1.051770688 |             | 0.998405241 | 1.993795805 |             |
| YJL208C  | YJL208C::NUC1::mitochondrial nuclease                                                                                                                  | 1           |             |             |             | 1.369429873 |             |
|          | 1.147892782                                                                                                                                            | 1.294197648 | 1.691605685 | 1           | 1.268526659 | 1.185462429 |             |
|          | 1.284660591                                                                                                                                            | 1.5632481   | 1           | 0.843227165 | 0.626632473 | 0.788457004 |             |
|          | 1.373450782                                                                                                                                            | 1           | 0.551374576 | 0.379494439 | 0.477674694 | 0.772611862 | 1           |
|          | 0.450552433                                                                                                                                            | 0.644393152 | 0.521622865 | 0.855880537 | 1           | 0.996295664 |             |
|          | 0.823155618                                                                                                                                            | 0.873768638 | 1.094993195 | 1.057303436 | 1           | 0.977072254 |             |
|          | 0.883567635                                                                                                                                            | 0.878773985 | 0.984362211 | 0.81307017  | 1           | 0.756656008 |             |
|          | 0.660967366                                                                                                                                            | 0.767209565 | 1.014386671 | 0.664222228 | 1.96840267  |             |             |
| YJL210W  | YJL210W::PEX2::Required for peroxisome biogenesis                                                                                                      |             |             |             |             |             | 1           |
|          | 1.38832097                                                                                                                                             | 1.439104339 | 1.044858955 | 0.952365598 | 1           | 1.171832526 |             |
|          | 1.197681973                                                                                                                                            | 1.095463672 | 1.272830898 | 1           | 1.457879185 | 1.430875587 |             |
|          | 1.473803756                                                                                                                                            | 1.005699193 |             | 0.650570485 | 0.6832003   | 0.468976946 | 1           |
|          | 2.40961386                                                                                                                                             | 2.269225956 | 1.891656518 | 1.819702355 | 1           | 0.913713923 |             |
|          | 1.083113807                                                                                                                                            | 1.201415505 | 1.183416816 | 1.025033257 | 1           | 1.141078458 |             |
|          | 1.063469227                                                                                                                                            | 1.14198227  | 0.872413385 | 0.996466913 |             | 1.245358446 |             |
|          | 1.092793179                                                                                                                                            | 0.995769888 | 1.191571773 | 1.06113897  | 0.80732532  |             |             |
| YJL212C  | "YJL212C::OPT1::Oligopeptide transporter; Opt1p transports tetra- and pentapeptides, including the endogenous opioid pentapeptide leucine enkephalin." | 1           | 1.404465013 | 0.943974086 | 0.912734854 | 0.535396515 | 1           |
|          | 1.27302044                                                                                                                                             | 1.138070464 | 0.586149941 | 0.587197363 | 1           | 2.409318468 |             |
|          | 2.391999686                                                                                                                                            | 0.760165857 | 1.026712192 | 1           | 1.204742414 | 0.519483174 |             |
|          | 0.652306311                                                                                                                                            | 0.295021514 | 1           | 1.034735662 | 0.479532615 | 0.347538745 |             |
|          | 0.270113794                                                                                                                                            | 1           | 1.020358414 | 1.229051343 |             | 1.039721931 | 1           |

|         |                                                                                                                       |             |             |             |             |             |
|---------|-----------------------------------------------------------------------------------------------------------------------|-------------|-------------|-------------|-------------|-------------|
|         | 1.392906385                                                                                                           | 0.775056279 | 0.845239543 | 1.009890598 | 0.642208331 | 1           |
|         | 1.257149035                                                                                                           | 0.750109767 | 0.830192947 | 0.860907364 | 0.562421101 | 0.648837381 |
| YJL214W | YJL214W::HXT8::High-affinity hexose transporter                                                                       | 1           | 1.497490775 |             |             |             |
|         | 1.242975643                                                                                                           | 1.811668987 | 1.234423846 | 1           | 1.590679801 | 1.669442444 |
|         | 1.266516467                                                                                                           | 1.387627395 | 1           | 1.466289173 | 1.181964629 | 1.065873719 |
|         | 1.500314181                                                                                                           | 1.353489765 | 0.726157868 |             | 0.527367662 |             |
|         | 1                                                                                                                     | 1.046457003 | 0.909440629 | 1.041903878 | 1.212498207 | 1.024732188 |
|         | 0.945855435                                                                                                           | 0.631800937 | 0.62591591  | 0.736717032 | 1.335151385 | 1           |
|         | 1.002210001                                                                                                           | 0.658333785 | 0.904785504 | 1.06334429  | 0.949197836 | 0.913275817 |
| YJL216C | YJL216C::YJL216C::alpha-glucosidase                                                                                   |             | 1.047825251 | 0.840447656 |             |             |
|         | 1.405509488                                                                                                           | 0.916314974 | 1.142927239 | 1.320255188 | 1.025534505 |             |
|         | 1.216723524                                                                                                           | 0.825857923 | 0.872616512 | 0.841367553 | 0.932976526 | 1           |
|         | 1.280660154                                                                                                           | 2.017734679 | 1.011050659 |             | 0.356235095 |             |
|         | 0.141750412                                                                                                           | 1           | 0.887177632 | 0.837693218 | 1.02880014  | 0.903193254 |
|         | 1.012277911                                                                                                           | 1           | 0.724560784 | 0.800310195 | 0.768587875 | 0.744192822 |
|         | 0.908754435                                                                                                           | 1           | 0.843921564 | 0.81318736  | 0.986754858 | 1.067936649 |
|         | 0.839686271                                                                                                           | 0.718887286 |             |             |             |             |
| YJR006W | YJR006W::HYS2::Putative role in DNA replication                                                                       | 1           | 0.850899791 |             |             |             |
|         | 1.029655212                                                                                                           | 1.001305913 | 1.027012507 | 1           | 1.134182699 | 0.993095254 |
|         | 0.905473894                                                                                                           | 0.887167966 | 1           | 0.916487519 | 0.94719141  | 0.775028893 |
|         | 1.034550562                                                                                                           | 1           | 1.289070209 | 0.846796527 | 0.996125086 | 1.031515687 |
|         | 1.684998175                                                                                                           | 1.45782815  | 0.961988682 | 1.527464082 | 1           | 1.019446101 |
|         | 1.194630452                                                                                                           | 1.268966189 | 1.078995748 | 1.205369896 | 1           | 1.021779749 |
|         | 1.07935847                                                                                                            | 1.175622819 | 0.91953364  | 0.804482881 | 1           | 1.232058865 |
|         | 0.898863146                                                                                                           | 0.982168465 | 0.998663636 | 0.9406909   | 0.87825089  |             |
| YDL188C | YDL188C::PPH22::serine-threonine protein phosphatase 2A                                                               |             | 1           |             |             |             |
|         | 0.761087632                                                                                                           | 0.74200253  | 0.867718456 | 0.637852119 | 1           | 0.850861955 |
|         | 0.858631221                                                                                                           | 0.769050854 | 0.748244759 | 1           | 0.741799377 | 0.872736313 |
|         | 0.812919759                                                                                                           | 0.817525868 | 1           | 0.911396727 | 1.193210377 | 1.90105275  |
|         | 1.005767136                                                                                                           | 1.045102363 | 1.18983408  | 1.110086152 | 1           | 0.963615699 |
|         | 0.950697347                                                                                                           | 1.193430064 | 1.048718134 | 0.834284668 | 1           | 0.911357499 |
|         | 0.898739815                                                                                                           | 0.873325484 | 0.757150573 | 1.020617045 | 1           | 1.193737176 |
|         | 0.961125747                                                                                                           | 1.072542267 | 1.044480822 | 1.123564275 | 0.864240878 |             |
| YDL190C | YDL190C::UFD2::Ubiquitin fusion degradation protein                                                                   |             | 1           |             |             |             |
|         | 2.372946834                                                                                                           | 2.16711711  | 1.912581388 | 1           | 1.954226679 | 2.170094793 |
|         | 2.013009507                                                                                                           | 1.912474825 | 1           | 2.418608032 | 2.344833044 | 2.635789569 |
|         |                                                                                                                       |             |             |             | 1           | 0.829947945 |
|         | 0.963944446                                                                                                           | 0.95032563  | 0.992737936 | 0.895568273 | 1           | 1.01971238  |
|         | 1.103261951                                                                                                           | 0.804965546 | 0.9283811   | 1.019819589 | 1           | 0.869127442 |
|         | 0.806051515                                                                                                           | 0.867943953 | 0.895601735 | 0.761885504 | 0.891385238 |             |
| YDL192W | YDL192W::ARF1::implicated in signal transduction and intracellular protein transport to or within the Golgi apparatus |             | 1           | 0.933129829 |             |             |
|         | 0.919246066                                                                                                           | 0.8026224   | 1.370803261 | 1           | 0.858934287 | 0.853882749 |
|         | 1.233581054                                                                                                           | 1.233151669 | 1           | 0.799195695 | 0.925668968 | 0.898652213 |
|         | 0.952472515                                                                                                           | 1           | 0.889061869 | 0.712160301 | 0.807520927 | 1.265314577 |
|         | 1.856896107                                                                                                           | 1.676935833 | 1.973252079 | 1.454934096 | 1           | 1.128166756 |
|         | 1.31204509                                                                                                            | 0.95929904  | 1.046458372 | 0.923971389 | 1           | 1.240358335 |
|         | 1.765553732                                                                                                           | 1.167255375 | 0.865592551 | 1.661603088 | 1           | 1.492247057 |
|         | 1.778531294                                                                                                           | 1.079750619 | 1.84230632  | 1.593767942 | 1.377356512 |             |
| YDL206w | YDL206w::YDL206W::molecular_function unknown                                                                          |             | 1           | 0.997036453 |             |             |
|         | 0.936192405                                                                                                           | 1.122918091 | 0.815124552 | 1           | 1.009161062 | 1.108870208 |
|         | 0.865320766                                                                                                           | 0.754658389 | 1           | 1.183187424 | 1.134846418 | 0.930820028 |
|         | 0.99953889                                                                                                            | 1           | 1.787779215 | 2.014405521 | 1.175813571 | 1           |
|         | 2.130347501                                                                                                           | 2.930454552 | 2.244411499 | 2.030316032 | 1           | 1.202893877 |
|         | 1.643304768                                                                                                           | 1.293482281 | 1.295584073 | 1.073925805 | 1           | 1.115157941 |
|         | 1.034634159                                                                                                           | 1.288102597 | 0.920397909 | 0.946809625 | 1           | 1.427471257 |
|         | 1.186004141                                                                                                           | 1.207761006 | 1.010097371 | 1.471684964 | 0.829215951 |             |

YDL208W YDL208W::NHP2::HMG-like nuclear protein 1 0.825135315  
0.90042854 0.77626876 1.460294159 1 0.77516781 0.706415661  
1.041233209 1.255637322 1 0.647516781 0.560935936 0.473242351  
1.080847375 1 0.182890111 0.177794762 0.548550854 1  
1.165788803 0.640376039 0.602159159 1 0.761229296 0.652283757  
0.491573886 0.637287593 0.78304678 1 0.809234183 0.997475579  
0.621351692 0.961362197 1.883637035 1 0.933073546 0.975657865  
1.014880509 1.690312624 0.835683267 1.136559933  
YDL210W YDL210W::UGA4::GABA-specific transport protein 1 1.687605571  
1.562538431 1.322508055 1 1.444448017 1.318473768 1.615753495  
1.75639555 1 1.224293704 1.43263629 1.459608241 1  
1.001019786 0.152505874 0.289177647 1  
0.821189175 0.943057463 1.070269414 1.097455298 0.932109556 1  
1.180281607 1 0.849472668  
0.906270811  
YDL212W YDL212W::SHR3::Protein required for appearance of amino acid  
permeases on the cell surface 1 1.452564334 0.976645606 0.967024138  
1.415489664 1 0.994425152 0.931729075 1.171978151 1  
1.101376237 0.824929451 2.708729566 1 0.76138982 0.838390065  
0.397285595 0.596607003 1 1.191337772 0.758839905 0.66465721  
0.740957367 1 1.397912554 1.06339059 1.13440464 1.391261875  
1.442423337 1 1.075566021 1.087222303 0.789511101 0.730981798  
1.207388724 1 0.751703018 0.843766536 0.479797451 0.97065022  
0.59007276 0.790688469  
YDL214c YDL214c::PRR2 1 1.660625808 1.629052574 1.851395773  
1.503117989 1 1.888855816 2.04918305 1.580483142 1.548697117 1  
1.451143642 1.697476841 1.168501578 1.717668349 1 2.918054733  
1.708377804 1.14349102 1 1.550454244 1.079591122 1  
0.680574569 1.090931646 0.865150594 1.619860083 1.127086132 1  
0.848025985 1.002454446 1 0.702914314 0.854420626 0.736776135  
0.733916069 0.975445103  
YDL216c YDL216c::RRI1::Hypothetical ORF 0.827424853 1.069350114  
0.981905928 0.991586239 0.975363229 0.882186527  
1.230950305 1.460707221 1.229331485 0.869342243 1 0.766098462  
0.898513397 1.334124822 0.415607611 0.863265085 0.803252331  
0.54574124 1 0.954311613 1.091926888 0.830035867 1.028735076 1  
1.091830361 1.149865228 1.808369998 1.048537395 1.240281729 1  
1.024235563 1.294010768 1.008190337 0.639028062 1.318227977 0.83184279  
YDL230W YDL230W::PTP1::phosphotyrosine-specific protein phosphatase 1  
1.038448242 1.253114097 1.155475412 1.267241362 1 1.160125566  
1.243151783 1.521349527 1.232969117 1 1.458473159 1.554241055  
0.9088787 1.389042612 1 1.154676829 0.585154069 1.397826171  
1.358225887 1 1.881580836 2.574526332 2.343085938 1.526804371 1  
1.10175345 1.164833961 1.032792273 1.046696298 1 1.404558781  
1.35347364 1.964628458 1.309066281 0.867009206 1 1.223974046  
0.904285199 0.876839965 0.713339501 0.972149951 1.230251695  
YJR008W YJR008W::YJR008W::molecular\_function unknown 1 1.212097695  
1.37833899 1.316577488 1.519957429 1 1.342706398 1.521890326  
1.224510617 1.274001095 1 1.264424704 1.794280055 2.367905787  
1.317591465 1 2.380821795 2.516305623 2.555216127 2.153161318 1  
2.617576683 2.050690096 2.9393529 1.907098327 1 1.201898673  
1.660915323 1.591696648 1.270817645 1.289599903 1 0.806397213  
1.110444268 1.265093857 1.003122176 1.096629541 0.95447181  
1.161271137 1.030178683 1.176156888 1.263484747 1.073514981  
YJR010CA YJR010CA::SPC1::Homolog of the SPC12 subunit of mammalian signal  
peptidase complex. Protein is important for efficient signal peptidase activity.  
1 1.420635022 1.560415071 1.414362914 1.491704896 1 1.373898197

1.382938263 1.652740159 1.520157572 1 1.248228977 1.580670026  
1.421586469 1 0.55803514 0.50442267 0.505065362 1  
0.877715259 1.094900149 1.186277032 0.518925872 1 0.984171257  
1.142680607 0.890593328 1.321988639 1.216571176 1 0.700112196  
0.563235744 0.614564589 0.653076201 0.431038251 1 0.922176075  
0.555797527 0.818354925 0.755367693 0.919507614  
YJR011C YJR011C::YJR011C::molecular\_function unknown 1 1.143361918  
1.308806889 0.92103335 1.429900578 1 0.900739453 0.925152425  
1.217336994 1.119415798 1 1.061586278 1.209822558 1.23193002  
1.02672592 1 1.279414562 0.717647145 0.910283838 1.436742071 1  
1.626178609 1.749024148 1.678994206 1.150919414 1 1.157558604  
1.160398349 0.855265273 0.909582964 1.24465745 1 1.389201729  
1.663901704 1.378812677 1.142724862 1.365141508 1 1.439172984  
1.794148056 0.911537931 2.023694107 1.54970102 3.101460256  
YJR013W YJR013W::YJR013W::molecular\_function unknown 1 1.779563174  
1.517359834 1.591152417 1.449135048 1 1.655523261 1.33599575  
1.377771837 1.422354534 1 1.418524151 1.30335108 1.280155472  
1.254593673 1 1.349352307 1.208728697 0.754855396 1.299601339 1  
0.80980806 1.110446942 0.714231197 0.715310812  
0.913320783 0.670767248 1 1.228580296 1.308650379 1.023730188  
0.950213786 1.134264278 1 0.97834444 0.820268113 0.564785225  
1.112914882 0.474511772 2.640006452  
YJR015W YJR015W::YJR015W::molecular\_function unknown 1 1.473879933  
1.120132618 1.157883375 1.185115575 1 1.341258744 1.159743612  
1.053591791 1 1.123222201 1.1633902 0.795733272 1.01046428 1  
0.97475234 0.68334372 0.74623308 0.690773736 1 0.659514092  
0.490083378 0.575375178 0.586765497 1 1.285838108 1.1889163  
1.21444546 1.150362039 1.114713394 1 0.985915321 0.809640944  
0.958418572 0.700389413 0.419255275 1 0.998214919 0.865003169  
0.865549881 0.834426067 0.597680526 0.784559128  
YJR029W YJR029W::YJR029W::molecular\_function unknown 1 0.985232071  
0.919630496 1.254022368 0.83201296 1 1.154956981 1.128696257  
0.925999094 0.807742885 1 1.291082331 1.252477459 0.646676661  
1.143928587 1 0.920744125 1.166367184 0.816023561 0.530219728 1  
0.408624221 0.44290564 0.458022628 0.633384678 1.115011995  
0.801188501 0.276892859 1  
1.061319032 0.926958404  
YJR029W YJR029W::YJR029W::molecular\_function unknown  
1 1.012295425  
0.888876638 1.269694501 1.36393225 0.941549327 1 0.853170183  
1.154364542 2.420942465 4.802376269 1.619248764 1 1.039784598  
1.767863613 1.637933121 1.33064939 0.768948483 0.801195979  
YJR031C YJR031C::GEA1::component of a complex guanine nucleotide exchange  
activity for the ADP-ribosylation factor ARF 1 1.716523172 1.258423074  
1.362411033 1.123576635 1 1.577109929 1.310196391 0.95185052  
1.134918023 1 1.616056698 1.092690179 1.029045526 1.068673356 1  
0.91659361 0.605796212 0.667596981 0.47561653 1  
0.478730444 1 1.026486468 0.86670852 1.30541917 1.361192696  
0.902144119 1 1.00310813 0.903925439 0.956410645 1.384657915  
0.8059167 1 0.743693283 0.629444395 0.677354401 0.798314352  
0.650254443 1.595386951  
YJR033C YJR033C::RAV1::Regulator of (H<sup>+</sup>)-ATPase in vacuolar membrane  
1.077376125 1.262386776 0.796880776 1.197410019 1.180760702  
0.898336405 0.686420429 1.007908382 1.057717 0.708151003  
1.059266115 1 1.256186916 1.0019144 1  
1 0.875018547 0.872941535 0.92109695 0.974991972 1.006197912 1

|                           |                                                                     |             |             |             |             |             |             |
|---------------------------|---------------------------------------------------------------------|-------------|-------------|-------------|-------------|-------------|-------------|
|                           | 1.103639385                                                         | 1.276509848 | 0.813085926 | 1.11234702  | 1.24171956  |             |             |
|                           | 0.924928676                                                         | 0.88837273  |             | 0.718798121 | 0.950052073 |             |             |
| YJR035W                   | YJR035W::RAD26::May be involved in transcription-coupled DNA repair |             |             |             |             |             |             |
|                           | 1                                                                   | 1.469292018 | 1.30325439  | 1.731648984 | 1.468231451 | 1           | 1.614498507 |
|                           | 1.491544307                                                         |             | 1           | 1.375784927 |             | 1.661369729 |             |
|                           |                                                                     |             |             | 0.842021681 |             | 1           | 0.763896909 |
|                           | 0.842023672                                                         | 1.006598562 | 0.945697785 | 0.921739311 | 1           | 0.959678143 |             |
|                           | 0.924091565                                                         | 1.027641519 |             | 1           | 0.864464082 | 0.816688665 |             |
|                           | 0.940175793                                                         | 0.62436837  | 1.203107335 |             |             |             |             |
| YJR037W                   | YJR037W::YJR037W::molecular_function unknown 1                      |             |             |             |             |             |             |
|                           | 1                                                                   |             |             | 1           | 2.150703644 |             | 1           |
|                           | 0.911825724                                                         | 1.476431002 | 1.626721252 | 1           | 0.922878482 |             |             |
|                           | 0.508143613                                                         | 1           | 1.033965326 | 1.336000685 | 1.264593005 | 0.557539278 | 1           |
|                           | 1.492179478                                                         | 1.203590503 |             | 1           | 0.84967511  | 0.434227974 |             |
|                           | 0.339310843                                                         | 1.239014671 |             |             |             |             |             |
| YDL232W                   | YDL232W::OST4::May be subunit or accessory component of             |             |             |             |             |             |             |
| oligosaccharyltransferase | 1                                                                   | 1.395736623 | 1.523174687 | 1.140205774 |             |             |             |
|                           | 2.050736462                                                         | 1           | 1.114024144 | 1.151309126 | 1.50049376  | 1           |             |
|                           | 1.496268239                                                         | 1.240790329 | 1.320943651 | 1.162365634 | 0.638471166 |             |             |
|                           | 2.478974029                                                         | 0.296950049 | 0.457974573 | 1           | 1.921489825 | 2.264712424 |             |
|                           | 2.147808296                                                         | 1.719219289 | 1           | 0.964275138 | 0.945482668 | 0.633349843 |             |
|                           | 0.786392822                                                         | 1.073777951 | 1           | 0.916938078 | 1.636055549 | 1.152519413 |             |
|                           | 0.940403068                                                         | 2.203386724 | 1           | 0.728957544 | 1.379566207 | 0.841068202 |             |
|                           | 1.496097963                                                         | 1.359600399 | 1.752123561 |             |             |             |             |
| YDL234C                   | YDL234C::GYP7::GTPase-activating protein 1 0.627763724              |             |             |             |             |             |             |
|                           | 0.762378012                                                         | 0.931956099 | 0.724810511 | 1           | 0.730002874 | 0.811598508 |             |
|                           | 0.705882524                                                         | 0.71776835  | 1           | 0.989729774 | 1.033991923 | 0.560384054 | 1           |
|                           | 1.359359918                                                         | 1.214576748 | 1.230010843 | 1           | 2.422766171 | 2.104713166 |             |
|                           | 2.212991326                                                         | 2.083408743 | 1           | 1.174771017 | 1.400004998 | 1.377224791 |             |
|                           | 1.032774907                                                         | 1.271133759 | 1           | 1.458438421 | 1.074102798 | 1.913471812 |             |
|                           | 1.247612618                                                         | 0.867268493 | 1           | 1.121054689 | 1.063872085 | 1.029870167 |             |
|                           | 0.578156742                                                         | 1.180078983 | 0.625195524 |             |             |             |             |
| YDL236W                   | YDL236W::PHO13::p-nitrophenyl phosphatase 1 0.994217468             |             |             |             |             |             |             |
|                           | 0.842688553                                                         | 0.78597631  | 0.769529704 | 1           | 0.810196251 | 0.796493786 |             |
|                           | 1.006585459                                                         | 1           | 0.819686695 | 0.84187778  | 0.876243308 | 0.831592515 | 1           |
|                           | 1.290494823                                                         | 0.784750998 | 0.815536005 | 1.19871895  | 1           | 1.771062525 |             |
|                           | 1.138167593                                                         | 1.070396518 | 1.272309875 | 1           | 1.132519046 | 1.056175658 |             |
|                           | 0.712995158                                                         | 1.006209879 | 1.100864043 | 1           | 0.87969293  | 0.889772231 |             |
|                           | 0.664720145                                                         | 0.604578529 | 0.63858629  | 1           | 1.386563248 | 1.500686914 |             |
|                           | 0.934976142                                                         | 1.48715783  | 1.290881038 | 4.343095073 |             |             |             |
| YAL034C                   | YAL034C::FUN19::Function unknown now 1 1.2401837                    |             |             |             |             |             |             |
|                           | 1.095466316                                                         | 1.120196159 | 0.882582012 | 1           | 1.212947911 | 1.234243903 |             |
|                           | 0.913937238                                                         | 1           | 1.362560772 | 1.278659644 | 1.304287774 | 1.034626833 | 1           |
|                           | 1.203695433                                                         | 0.962644008 |             | 1           | 0.825433779 | 0.800142357 |             |
|                           | 0.854286958                                                         | 1.102378422 | 1           | 1.429245345 | 1.361193182 | 1.448401652 |             |
|                           | 1.573681768                                                         | 1.239060519 | 1           | 1.041743489 | 0.871365013 | 1.489441169 |             |
|                           | 1.013141416                                                         | 1.146849583 | 1           | 0.713303664 | 0.909047042 | 0.822894938 |             |
|                           | 1.194044451                                                         | 0.922379695 | 1.101535006 |             |             |             |             |
| YDL238c                   | YDL238c::YDL238C::molecular_function unknown 1 0.956469347          |             |             |             |             |             |             |
|                           | 0.909384111                                                         | 2.242821561 | 0.610235305 | 1           | 1.586680926 | 1.458841027 |             |
|                           | 1.608622029                                                         | 1           | 1.162488902 | 1.428273759 | 1.994273803 | 1           |             |
|                           | 0.63853275                                                          | 1.290942939 | 1.527206836 | 0.561343144 | 1           | 0.674634467 |             |
|                           | 0.543331995                                                         | 0.269352393 | 0.25155233  | 1           | 1.23504823  | 1.371929403 |             |
|                           | 1.608722265                                                         | 2.275646387 | 2.477004239 | 1           | 0.753958897 | 0.280284939 |             |
|                           | 0.490727035                                                         | 0.816240578 | 0.27940042  | 1           | 0.52455388  | 0.463042674 |             |
|                           | 0.555508723                                                         | 0.315610267 | 0.496945329 | 0.324856497 |             |             |             |

YAL048C YAL048C::YAL048C::molecular\_function unknown 1 1.069022405  
 0.992308872 1.71027557 0.766085548 1 1.304162668 1.222164158  
 1.17805453 0.838845409 1 1.337721796 1.277479179 0.581147955  
 1.346046928 1 0.878982422 1.339730395 1.083004446 0.400248257 1  
 0.471275447 0.276427495 0.224892269 0.388855909 1 0.974621912  
 0.814766841 1.121072791 1.153858012 0.87785395 1 0.88641816  
 0.678328063 1.361499796 1.75996088 0.78013463 1 0.864557833  
 1.043786755 1.306628276 0.750153539 0.904364257 0.50611068  
 YDL240W YDL240W::LRG1::Expressed most highly in sporulating cells; may also  
 play a role during mating 1 0.769006653 0.635900122 0.920303934  
 0.683468588 1 0.801127676 0.915902901 0.598994065 1  
 0.776590734 0.652746772 0.358210375 0.844768535 1 0.772624912  
 0.430846365 0.381699758 1 0.890961449 0.826286237 0.64382099 1  
 0.804688227 0.676614937 0.828091882 1.044091578 0.909153228 1  
 0.862082084 0.618195377 0.84556081 0.845513863 0.531616865 1  
 0.588918919 0.672380566 0.709492033 0.399468361 0.640929353 0.607683061  
 YAL059W YAL059W::ECM1::putative transmembrane domain protein involved in  
 cell wall biogenesis 1 1.003482038 0.814962139 0.872814276 1.250551657 1  
 0.757685808 0.722009888 1.16212617 1.2702272 1 0.511445106  
 0.519438203 0.569409488 1.072858628 1 0.391071763 0.372344616  
 0.380175503 0.724724922 1 0.625493108 0.479911939 0.310919861  
 0.470132626 0.938116572 0.93562055  
 1.088970566 0.905467365 1.568208881 1 0.725307847  
 0.67674048 1.149266316 0.695017917 0.926410164  
 YDR006C YDR006C::SOK1::gene dosage suppressors of the conditional growth  
 defect of several temperature-sensitive A kinase mutants 1 0.738266669  
 0.741228204 0.870292054 0.652691619 1 0.882085233 0.888045122  
 0.722494331 0.698052102 1 0.949296997 0.856762789 0.561409199  
 0.908913755 1 0.753215698 0.906363349 1.089449941 0.541221627 1  
 1.291047282 0.959085603 0.862079002 0.576083801 1 1.016878199  
 0.656071314 0.746887267 0.492319051 0.658411076  
 0.722090661 1 0.862303599 1.137533137 0.351309333  
 0.496478783  
 YAL061W YAL061W::YAL061W::molecular\_function unknown 1 1.394155143  
 1.58848647 1.649416235 0.946367758 1 1.65639172 2.209948572  
 1.161191243 1.092079348 1 2.149488451 3.198387314 5.001343525  
 1.53419493 1 4.13261901 5.548657894 8.338157575 4.10504735 1  
 1.898664944 1.958818466 3.484885268  
 1.310456045 0.602034893  
 0.964489187 2.889309729 0.809076598  
 YDR008C YDR008C::YDR008C::molecular\_function unknown 1 1.092492374  
 1.12561302 0.853452615 1.289370986 1 0.784188539 0.757704172  
 1.25300075 1 1.100210081 1.05691292 1.982238423 1.131463827 1  
 1.510941109 1.00242468 1.433315745 1.810861139 1 2.452717406  
 2.991084665 2.744385888 1.223803343 1 0.73635081 0.945217922  
 0.612029259 0.67274647 0.834147523 1 0.942309948 1.308432174  
 0.947940688 0.712411324 1.634847861 1 1.131773156 1.593262129  
 0.907440928 1.688919474 1.384149782 1.656680573  
 YAR014C YAR014C::BUD14 1 1.136344434 1.160026021 1.286902754  
 0.799234338 1 1.191601682 1.140103098 0.980530693 0.996885891 1  
 1.186586185 1.178671174 0.757938494 1.474243621 1 1.291927633  
 1.015425051 0.759969145 1 0.91613699 0.558582792 0.729985936 1  
 0.893094024 0.888286471 1.047051598 1.233603405 1.137580028 1  
 0.990476423 0.936093538 0.599401927 0.880195275 0.972185852 1  
 0.843303814 0.94513379 0.954194374 1.165045686 0.932297409 0.941295842  
 YDR010c YDR010c::YDR010C::molecular\_function unknown 1 0.916182255  
 0.743725982 1.015601359 0.770691017 1 0.902020709 0.910046371



|         |                                                         |             |             |             |             |             |               |
|---------|---------------------------------------------------------|-------------|-------------|-------------|-------------|-------------|---------------|
|         | 0.943627316                                             | 1.010298269 | 1           | 1.18895902  | 0.969646538 | 1.228063078 |               |
|         | 1.04628732                                              | 1           | 0.62575844  | 0.851393007 | 1.023248608 | 1           |               |
|         | 1.28799621                                              | 2.136635068 | 1.812713827 | 0.734196746 | 1           | 1.180667789 |               |
|         | 1.088847727                                             | 1.096857462 | 1.105696236 | 1.147133292 | 1           | 1.037851225 |               |
|         | 1.076521918                                             | 1.124747261 | 1.103651473 | 0.951806515 | 1           | 0.950714757 |               |
|         | 1.245022608                                             | 1.345543415 | 1.09305064  | 0.921156488 |             |             |               |
| YAR018C | YAR018C::KIN3::protein kinase                           | 1           |             | 0.824670895 | 0.8785017   |             |               |
|         | 0.787134571                                             | 0.761702026 | 1           | 0.899467775 | 0.861917518 | 0.967983435 |               |
|         | 0.882823631                                             | 1           | 1.152245529 | 1.318364797 | 1.030228301 | 0.79798983  | 1             |
|         | 0.94866337                                              | 0.703857088 | 0.561104185 | 0.47011372  | 1           | 1.779173246 |               |
|         | 2.274413806                                             | 1.057394839 | 0.879588699 |             | 0.851380697 | 1.066744795 |               |
|         | 0.822405375                                             | 0.923016381 | 1.266898529 |             |             | 0.613612723 |               |
|         | 1.126925006                                             | 2.905461045 | 1           | 0.742933729 | 0.85775879  | 0.952297426 |               |
|         | 0.98320737                                              | 2.225532317 | 1.221495463 |             |             |             |               |
| YDR012W | YDR012W::RPL4B::Highly similar to ribosomal protein L4A |             |             |             |             |             | 1             |
|         | 1.240484764                                             | 0.722686555 | 0.7544079   | 0.642598498 | 1           | 0.902903919 |               |
|         | 0.870123555                                             | 0.593796839 | 0.713926388 | 1           | 1.152718658 | 0.692056491 |               |
|         | 0.511367033                                             | 0.807913613 | 1           | 0.746650274 | 0.32650837  | 0.598308731 | 1             |
|         | 0.92569843                                              | 0.410519367 | 0.277265459 | 0.676697332 | 1           | 1.160106714 |               |
|         | 0.707230547                                             | 1.150783418 | 1.500525133 | 1.084704641 | 1           | 0.931076999 |               |
|         | 0.52996804                                              | 0.574612041 | 0.491816565 | 0.50363234  | 1           | 0.96583536  |               |
|         | 0.488807268                                             | 0.671459022 | 0.488289772 | 0.435649637 | 0.46495636  |             |               |
| YAR020C | "YAR020C::PAU7::similar to Pau3, member of Pau1 family" |             |             |             |             |             | 1             |
|         | 1.397004003                                             | 1.559077683 | 1.242745054 | 1.321821774 | 1           | 1.18094264  |               |
|         | 1.22077868                                              | 1.489884672 | 1.326888561 | 1           | 1.261465457 | 1.316407197 |               |
|         | 1.728329043                                             | 1.422439512 | 1           | 0.564254263 | 0.535056111 | 0.60419303  |               |
|         |                                                         | 1.211542    | 1           | 1.012355939 | 0.987382033 | 0.893529398 |               |
|         | 0.808595776                                             | 0.960499229 | 1           | 1.185465843 | 1.153687534 | 1.102960751 |               |
|         | 1.418543598                                             | 0.794256925 | 1.132738704 | 0.978044182 | 0.941850392 |             |               |
|         | 1.085843941                                             | 1.267903512 |             |             |             |             |               |
| YDR014w | YDR014w::RAD61::Affects radiation sensitivity           |             |             |             |             |             | 1 0.789028227 |
|         | 0.77531564                                              | 1.047639395 | 0.867834306 | 1           | 0.966070456 | 1.044809462 |               |
|         | 0.874300577                                             | 0.768032538 | 1           | 0.929860892 | 0.86210755  | 1.217275152 |               |
|         | 0.893020686                                             | 1           | 0.396317047 | 0.366868328 | 0.473553292 | 0.508619858 | 1             |
|         | 0.969984933                                             | 1.44344123  | 1.160123113 | 1.476320364 | 1           | 0.835266718 |               |
|         | 0.894064984                                             | 0.630391596 | 0.763416257 | 0.90293548  | 1           | 0.951031188 |               |
|         | 1.307197125                                             | 1.80867521  | 1.284115022 | 1.038178366 | 1           | 0.771302667 |               |
|         | 0.806797774                                             | 0.921894819 | 0.442159916 |             |             |             |               |
| YAR027W | YAR027W::UIP3::Ulp1 Interacting Protein 3               |             |             |             |             |             | 1 1.309178957 |
|         | 1.154815637                                             | 1.249700297 | 1.153737263 | 1           | 1.163448214 | 1.337142938 |               |
|         | 1.173713256                                             | 1.100781454 | 1           | 1.256918811 | 1.441059187 | 1.631430442 |               |
|         | 1.402263059                                             | 1.196900788 | 1.128148415 | 1.311529395 | 1.065856692 | 1           |               |
|         | 1.24355278                                              | 1.061159983 | 1.145099015 | 1.214145931 | 1           | 1.240129113 |               |
|         | 1.737786651                                             | 1.555904795 | 1.223703955 | 1.295859636 | 1           | 1.113152165 |               |
|         | 1.194175863                                             | 1.595066964 | 0.90526204  | 1.215445914 | 1           | 1.34740128  |               |
|         | 1.425976084                                             | 1.118213212 | 1.360675367 | 1.405902835 | 1.389615299 |             |               |
| YAR029W | YAR029W::YAR029W::molecular_function unknown            |             |             |             |             |             | 1 1.317849608 |
|         | 1.227953322                                             | 1.017092862 | 1.276591485 | 1           | 0.943689703 | 1.309042622 |               |
|         | 1.233994437                                             | 1           | 1.139898774 | 1.02673504  | 1.176234679 | 1.162215991 | 1             |
|         | 0.859316476                                             | 0.843989582 |             |             | 0.537845168 |             |               |
|         | 0.696852864                                             | 1           | 0.938186576 | 0.91863303  | 0.959529463 | 1.021140791 |               |
|         | 1.091070866                                             | 1           | 1.050129059 |             | 1.007630969 | 1           |               |
|         | 0.989595484                                             |             | 1.53315152  | 1.154948061 |             |             |               |
| YAR031W | YAR031W::PRM9::pheromone-regulated membrane protein     |             |             |             |             |             | 1             |
|         | 1.513685597                                             | 1.50622815  | 1.336982107 | 1.402583884 | 1           | 1.403253473 |               |
|         | 1.383888002                                             | 1.38868808  | 1           | 1.270147974 | 1.538049507 | 2.108412386 |               |
|         | 1.571764285                                             | 1           | 1.541587755 | 1.543245654 | 1.565847774 | 1.460938782 | 1             |

1.456121875            1.700353498            1            1.080190836 1.028645192  
0.954101298 1.085653905 1.076568953 1            0.874951566 1.13871215  
0.956261813 0.984017838 1.493567515 1            1.09866779 1.147049634  
1.072761211 0.956517611 1.295364324 1.223246689  
YDR016c            YDR016c::DAD1::Duo1 And Dam1 interacting; localized to intranuclear  
spindles and spindle pole bodies            1            1.271074088 1.456162119 1.349155132  
2.045814476 1            1.172749599 1.063927694 2.162714196 1.762864612 1  
1.117302417 1.570485955 3.695353585 2.163981138            0.578905332  
1.2597863            0.401312934            0.855662762 1.129401179  
0.531608518 1            1.164615249 1.40885344 1.003427574 0.981342282  
1.414721468 1            1.07064769 1.917971946 2.045995934 1.823773695  
2.456230791 1            0.944789857 1.612578445 1.109486678 1.543438135  
1.63622211            1.581376939  
YDR030c            "YDR030c::RAD28::Protein involved in the same pathway as Rad26p, has  
beta-transducin (WD-40) repeats"            1            1.329594835 1.179520141  
1.20638796 1            1.192978313 1.328629335 1.355640535 1.623651992 1  
1.219858632            1.098427192 1.308797323 1            0.608413309 0.957142884  
0.86263449 1            0.745165486 1.411832599 1.185885949 1.305630147  
0.839968098 0.665449914 0.490008124 0.84545194 0.723395215 1  
1.109249464            1            0.507656485 0.604169182 0.618205728  
0.631884989 0.540047704 0.693494204  
YDR032c            YDR032c::PST2::Protoplasts-Secreted protein; the gene product was  
detected among the proteins secreted by regenerating protoplasts 1  
1.155904036 1.116218964 1.059810789 1.203858113 1            0.984743439  
1.004150226 1.557396            1.696689002 1            1.10064004 1.306167  
1.958322021 0.803854393 1            1.115424399 2.271939944 1.820829331  
1.872998364 1            2.153141166 2.236576668 3.727303972 2.868639903 1  
1.311621644 1.563693933 2.850074503 1.567925802 1.479317588 1  
1.385744218 2.166506913 3.679444555 2.230972422 1.284802594 1  
1.239028336 1.727491427 1.51489133 0.971711905 1.885123332 1.569993817  
YAR062W            YAR062W::YAR062W::molecular\_function unknown 1            1.058688942  
0.804550798 1.096127286 0.700556527 1            1.037696558 0.899298875  
0.767964658 0.72493092 1            0.922182715 0.951929077 0.699705504  
0.951668372 1  
0.968983661 0.802183894 1.2401474            1.306513844 1.089393241 1  
0.733091695 0.567155305 0.722471045 0.746294423 0.400735726 1  
0.809475713 0.654666572 0.974330437 -0.126928749            1.012227073  
0.537633156  
YDR034C            YDR034C::LYS14::Transcriptional activator of lysine pathway genes  
with 2-aminoadipate semialdehyde as co-inducer; saccharopine reductase synthesis  
1            0.847409481 0.696683944 0.795921471 0.771713969 1            0.773178752  
0.69875321 0.831050413 0.753955452 1            1.119087582 0.770976536  
1.166437468 0.775711825 1            1.058933918 0.820923289 1.57700479  
1.109022448 1            1.631510056 2.243917671 2.671251377 1.037895908 1  
1.086010492 0.960096076 1.061427183 0.97834566 1.209990059 1  
1.043724476 0.917793398 0.907360742 0.757210152 0.992839725 1  
1.000955118 0.903366548 1.012837155 0.982742824 1.17695241  
YAR068W            YAR068W::YAR068W::molecular\_function unknown 1            0.978236132  
0.826453767 1.279908475 0.853070858 1            1.09336966 1.170815781  
0.776916258 1.096501292 1            1.057600505 1.022514801 1.103788213 1  
1.304294172 1.814185661 1.54493526 1.174643218 1            0.73685  
0.690773149            0.586044943 1            1.131646472 1.110755007  
0.816355737 1            0.985768517 1.517850721 2.031754745 1.095302691  
0.48827258 1            1.541503576 2.491822776 1.939103493 1.080467879  
1.479602992 0.784559128  
YDR036c            YDR036c::YDR036C::molecular\_function unknown            1.084763825  
1.120596943            1.010295955            1.060597712 1.212613698 0.961935495

|             |                                                                               |             |             |             |             |             |
|-------------|-------------------------------------------------------------------------------|-------------|-------------|-------------|-------------|-------------|
| 1.037064777 |                                                                               | 1.332223383 | 1.178296699 | 1.065732193 | 0.965283155 | 1           |
| 1.001817548 | 0.786721                                                                      | 1.210330768 | 0.933573375 | 1           | 1.111520884 |             |
| 1.005306148 | 0.949044423                                                                   | 1.0152422   | 1           | 1.059050868 | 1.31198044  |             |
| 1.064141644 |                                                                               | 1.15978808  | 1           | 1.365801032 | 0.94401612  |             |
| 0.692746291 | 0.61928598                                                                    | 1           | 0.859662069 | 0.799688014 | 0.665347329 |             |
| 0.517358873 | 0.578982424                                                                   | 0.58841932  |             |             |             |             |
| YAR070C     | YAR070C::YAR070C::molecular_function unknown                                  |             |             |             | 1           | 2.058495449 |
| 1.938146371 | 2.113658336                                                                   | 2.299964544 | 1           | 2.15518288  | 1.904557506 |             |
| 1.856568895 | 1.93731204                                                                    | 1           | 1.752174511 |             | 1.888047237 | 1.65632219  |
|             |                                                                               | 0.552870212 |             | 0.351578418 |             |             |
| 1.140119754 |                                                                               | 0.985067874 |             | 1.047774867 | 1           | 1.021344609 |
| 1.01341846  | 0.810609997                                                                   | 0.721764014 | 1.016234354 |             | 1.145366226 |             |
| 1.007195796 | 0.947806098                                                                   | 1.134536642 | 0.921143898 | 1.098908116 |             |             |
| YDR038C     | YDR038C::ENA5::Na(+) ATPase                                                   |             |             |             | 1           | 0.820400691 |
| 0.7697081   | 0.410147255                                                                   | 1           | 0.856357343 | 0.782438364 | 0.540899302 |             |
| 0.619167862 | 1                                                                             |             | 0.618659975 | 0.3937289   | 0.840695506 | 1           |
| 0.679402453 | 0.426474676                                                                   | 0.652824199 | 0.437752107 | 1           | 0.618648924 |             |
| 0.354977139 | 0.423062651                                                                   | 0.802724099 | 1           | 0.910303048 | 0.851987288 |             |
| 1.160022139 | 1.385916253                                                                   | 1.229200391 | 1           |             | 0.470828598 | 0.513924352 |
| 0.916839608 | 0.177254881                                                                   | 1           | 0.508772002 | 0.426989291 | 0.777074639 |             |
| 0.348795006 | 0.501399019                                                                   | 0.50348379  |             |             |             |             |
| YAR073W     | YAR073W::IMD1::IMP dehydrogenase homolog                                      |             |             |             | 1           | 1.04366312  |
| 0.60063901  | 0.881116905                                                                   | 0.652028992 | 1           | 0.99183321  | 1.040630342 |             |
| 0.548224227 | 1                                                                             | 0.934181258 | 0.680286756 | 0.24458777  | 0.617438612 | 1           |
| 0.640963809 | 0.444343137                                                                   | 0.226931368 | 0.386575    | 1           | 0.766994599 |             |
| 0.152688583 | 0.138548876                                                                   | 0.466052445 | 1           | 0.834146748 | 0.702111057 |             |
| 0.969659082 | 1.106830835                                                                   | 0.839422141 | 1           | 1.02848301  | 0.632319244 |             |
| 0.699283217 | 0.541750016                                                                   | 0.629137356 | 1           | 0.88782053  | 0.611495014 |             |
| 0.747906539 | 0.686330881                                                                   | 0.900586624 | 0.668976735 |             |             |             |
| YDR040C     | YDR040C::ENA1::Plasma membrane Na+ pump; P-type ATPase                        |             |             |             | 1           |             |
| 0.875496614 | 0.561723555                                                                   | 0.94981     | 0.474243128 | 1           | 0.842806468 |             |
| 0.779505164 |                                                                               | 0.655705626 | 1           | 0.979135574 | 0.68175289  | 0.511383665 |
| 0.78776449  | 1                                                                             | 0.765891764 | 0.622949118 | 0.7261642   | 0.641434832 | 1           |
| 0.680860112 | 0.518497055                                                                   | 0.451055546 | 0.884537823 | 1           | 0.909102323 |             |
| 0.644545331 | 1.129818877                                                                   | 1.272002762 | 1.051196624 | 1           | 0.893998534 |             |
| 0.590112583 | 0.788683532                                                                   | 0.76855628  | 0.357503562 | 1           | 0.741481686 |             |
| 0.608110362 | 0.986726685                                                                   | 0.554326412 | 0.55083485  | 0.556896844 |             |             |
| YBL001C     | YBL001C::ECM15::ExtraCellular Mutant                                          |             |             |             | 1           | 1.118064461 |
| 1.283328521 | 0.840923529                                                                   | 1.635854197 | 1           | 0.824181038 | 0.863245588 |             |
| 1.525154712 | 1.390259921                                                                   | 1           | 0.75219781  | 1.01033223  | 1.285766986 |             |
| 1.202649717 | 1                                                                             |             | 0.712314967 | 1.210723171 | 1.393510785 | 1           |
| 1.691542905 | 2.629963316                                                                   | 2.667939535 | 1.558931032 | 1           | 0.789834656 |             |
| 0.89466702  | 0.676748124                                                                   | 0.742668324 | 0.845619003 | 1           | 0.917278335 |             |
| 1.419377061 | 1.026362342                                                                   | 1.252341352 | 1.856739447 | 1           | 0.991248849 |             |
| 1.423536941 | 1.074429878                                                                   | 1.923455826 | 1.377279876 | 1.344082811 |             |             |
| YDR054c     | "YDR054c::CDC34::ubiquitin-conjugating enzyme, E2"                            |             |             |             |             |             |
| 0.95547874  | 1.102375818                                                                   | 1.190825554 | 0.959389639 |             | 1.153823795 |             |
| 1.208220226 | 1.00830975                                                                    | 1.120079485 |             | 1.233361538 | 1.118006912 |             |
| 0.99561823  | 1.283454569                                                                   | 1           | 1.093688092 | 1.008690972 | 0.976099602 |             |
| 1.180493217 | 1                                                                             | 1.605448581 | 1.114027309 | 1.542034608 |             | 1           |
| 0.95045044  | 1.125684438                                                                   | 1.31379674  | 0.975863981 | 1.223795345 | 1           |             |
| 1.23502689  | 1.001942738                                                                   | 0.73637532  | 0.887371074 | 0.755597258 | 1           |             |
| 0.758537393 | 0.922128913                                                                   | 0.765511877 | 0.676695447 | 0.598355862 | 1.034111939 |             |
| YBL003C     | YBL003C::HTA2::Histone H2A (HTA1 and HTA2 code for nearly identical proteins) |             |             |             | 1           | 1.518305382 |
| 1.27530649  | 1.106381328                                                                   | 1.622027783 | 1.527848377 | 1           | 0.954692967 |             |
| 1.136133929 | 0.984369247                                                                   | 1.183924414 | 1           | 1.061932398 | 0.472206473 |             |

|                                                          |                                                                      |             |             |             |             |              |             |
|----------------------------------------------------------|----------------------------------------------------------------------|-------------|-------------|-------------|-------------|--------------|-------------|
|                                                          | 0.335531053                                                          | 0.604170913 | 1           | 1.275769398 | 0.903444437 | 1.333068036  | 1           |
|                                                          | 0.824900365                                                          | 0.844843648 | 0.667539112 | 1.063369043 | 0.990762728 | 1            |             |
|                                                          | 0.431369768                                                          | 0.763085864 | 0.538896091 | 0.746940712 | 1.107332438 | 1            |             |
|                                                          | 0.632131173                                                          | 0.878956071 | 1.13393375  | 1.521432855 | 1.289568971 | 1.429894006  |             |
| YDR056c                                                  | YDR056c::YDR056C::molecular_function unknown                         |             |             |             |             | 1            | 0.896867771 |
|                                                          | 0.948351595                                                          | 0.93113697  | 1.18037454  | 1           | 0.840612552 | 0.81367802   |             |
|                                                          | 1.362110758                                                          | 1.378720234 | 1           | 0.82461793  | 1.034902636 | 1.500736353  |             |
|                                                          | 1.139939323                                                          | 1           | 0.733051304 | 2.258968051 | 2.032734505 | 0.767078901  | 1           |
|                                                          | 0.631783223                                                          | 0.486571561 | 0.440698191 | 0.404303324 | 1           | 1.086552545  |             |
|                                                          | 1.43855223                                                           | 0.919164391 | 1.049738722 | 1.145722911 | 1           | 1.061281335  |             |
|                                                          | 1.399133138                                                          | 1.422628806 | 1.165453772 | 1.794023231 | 1           | 1.07175575   |             |
|                                                          | 1.107050809                                                          | 0.929608606 | 0.958687355 | 0.936111179 | 1.073514981 |              |             |
| YBL015W                                                  | YBL015W::ACH1::Mannose-containing glycoprotein which binds           |             |             |             |             |              |             |
| concanavalin A                                           | 1                                                                    | 1.30523413  | 1.26095299  | 1.115801907 | 0.640010037 | 1            |             |
|                                                          | 1.50361803                                                           | 1.659921754 | 0.793016358 | 0.892738448 | 1           | 1.257223436  |             |
|                                                          | 1.329418204                                                          | 1.232021308 | 0.881158558 |             |             |              |             |
|                                                          | 0.719455172                                                          |             |             | 1.111588188 | 0.965500672 |              |             |
|                                                          | 1.15086182                                                           | 1.043947315 | 1           | 0.981582244 | 0.720337509 | 0.56969499   |             |
|                                                          | 0.703576234                                                          | 1.222631163 | 1           | 0.95336422  | 0.741050275 | 0.772710151  |             |
|                                                          | 1.262916516                                                          | 0.841474686 |             |             |             |              |             |
| YDR058c                                                  | YDR058c::TGL2::Triglyceride Lipase                                   |             |             |             |             | 0.699371039  | 0.830198291 |
|                                                          | 0.894516813                                                          | 1.082739662 |             | 0.688904239 | 0.876508812 | 1.156011293  |             |
|                                                          | 0.853587461                                                          | 1.0841599   | 1.764534649 | 1.369605659 | 1           | 1.345747005  |             |
|                                                          | 1.892963053                                                          | 1.948475461 |             | 0.671724385 | 0.773807517 | 0.675110205  | 1           |
|                                                          | 1.218468878                                                          | 1.425929003 | 1.489861201 | 1.15352434  | 1.259158279 | 1            |             |
|                                                          | 1.004079703                                                          | 1.523470296 | 1.649640924 | 1.294477541 | 1.313266732 | 1            |             |
|                                                          | 1.352748839                                                          | 1.763430401 | 1.324858621 | 1.192215645 | 1.524033969 | 1.161077402  |             |
| YBL017C                                                  | YBL017C::PEP1::vacuolar protein sorting receptor for                 |             |             |             |             |              |             |
| carboxypeptidase Y and proteinase A; related to Sortilin |                                                                      |             |             |             |             | 0.95547874   |             |
|                                                          | 0.805144346                                                          | 0.999622517 | 0.844850223 |             | 1.078758615 | 0.942060813  |             |
|                                                          | 0.80412786                                                           |             |             | 0.711656726 |             | 0.984697499  |             |
|                                                          | 1                                                                    | 0.845361647 | 1.232632156 |             | 1           | 0.849392958  |             |
|                                                          | 0.639172024                                                          | 0.737427229 | 0.724385406 | 0.867973554 | 1           | 0.884809979  |             |
|                                                          | 0.86468347                                                           |             | 1           | 0.658954016 | 1.123267518 | 0.463388475  |             |
|                                                          | 0.912756963                                                          |             | 3.843989243 |             |             |              |             |
| YBL017C                                                  | YBL017C::PEP1::vacuolar protein sorting receptor for                 |             |             |             |             |              |             |
| carboxypeptidase Y and proteinase A; related to Sortilin |                                                                      |             |             |             |             | 0.867358349  |             |
|                                                          | 0.896838387                                                          | 0.964526992 | 1           | 2.22859414  | 1.551509514 |              |             |
|                                                          | 2.440786791                                                          |             | 0.805619674 | 0.927304916 | 1.002026077 | 1.045130179  |             |
|                                                          | 0.81879456                                                           | 1.346709701 |             |             |             |              |             |
| YBL019W                                                  | "YBL019W::APN2::AP endonuclease 2, homolog of human HAP1 and E. coli |             |             |             |             |              |             |
| exoIII"                                                  | 1                                                                    | 1.041235877 | 0.981750121 | 0.872074958 | 0.980190473 | 1            |             |
|                                                          | 0.908008882                                                          | 0.950075699 | 1.116625583 | 0.943601031 | 1           | 0.908847736  |             |
|                                                          | 0.850500545                                                          | 0.909140295 | 0.903572391 | 1           | 0.869856088 | 0.566555825  |             |
|                                                          | 0.585354925                                                          | 0.735316498 | 1           | 1.388948997 | 1.099087402 | 0.846447145  |             |
|                                                          | 0.964666941                                                          | 1           | 0.911659194 | 1.019597071 | 1.152071318 | 1.1903217    |             |
|                                                          | 1.1300169                                                            | 1           | 1.010453523 | 0.923602887 | 1.152641789 | 1.255201212  |             |
|                                                          | 1.095110284                                                          | 1           | 0.822044305 |             | 0.845514276 | -0.146234677 |             |
|                                                          | 1.051007867                                                          | 1.036738829 |             |             |             |              |             |
| YBL021C                                                  | YBL021C::HAP3::Regulates respiratory functions; encodes divergent    |             |             |             |             |              |             |
| overlapping transcripts                                  | 1                                                                    | 0.995026177 | 1.125263901 | 1.127494471 | 1.252028395 | 1            |             |
|                                                          | 0.988513704                                                          | 1.136367104 | 1.310789463 | 1.175544367 | 1           | 1.073447704  |             |
|                                                          | 1.220366773                                                          | 1.338511727 | 1.248553471 | 1           | 1.170453587 | 0.757640239  |             |
|                                                          | 1.269070613                                                          | 1           | 1.59204387  | 2.26056853  | 1.800903178 | 1.18197125   | 1           |
|                                                          | 1.169794583                                                          | 1.031213722 | 0.900851646 | 0.928675162 | 0.87740682  | 1            |             |

|         |                                                                                                                                                                               |             |             |             |             |                                                                 |
|---------|-------------------------------------------------------------------------------------------------------------------------------------------------------------------------------|-------------|-------------|-------------|-------------|-----------------------------------------------------------------|
|         | 1.233162583                                                                                                                                                                   | 1.264498982 | 1.207957693 | 1.21560269  | 1.176734018 | 1                                                               |
|         | 1.246032868                                                                                                                                                                   | 1.065441291 |             | 0.091555618 | 1.141260632 | 1.061256299                                                     |
| YMR290C | YMR290C::HAS1::Helicase Associated with SET1                                                                                                                                  |             |             |             |             | 1 1.107389412                                                   |
|         | 0.839884231                                                                                                                                                                   | 0.964014043 | 0.869444413 | 1           | 0.939031412 | 0.732098695                                                     |
|         | 0.830373319                                                                                                                                                                   | 0.900917874 | 1           | 0.684611403 | 0.479762472 | 0.357070066                                                     |
|         | 1.109284576                                                                                                                                                                   | 1           | 0.390346077 | 0.175522644 | 0.183936279 | 0.365366867 1                                                   |
|         | 0.883427004                                                                                                                                                                   | 0.510707031 | 0.164579914 | 0.690021687 | 1           | 0.980081155                                                     |
|         | 0.714814893                                                                                                                                                                   | 0.796978164 | 1.319111577 | 0.84274353  | 1           | 0.910406898                                                     |
|         | 0.572468707                                                                                                                                                                   | 0.439619842 | 0.686889119 | 0.897668425 | 1           | 0.743580167                                                     |
|         | 0.548260146                                                                                                                                                                   | 0.737053851 | 0.905260295 | 0.426689244 | 0.767922225 |                                                                 |
| YMR293C | YMR293C::YMR293C::amidase                                                                                                                                                     |             |             | 1           | 0.904638759 | 1.237410982                                                     |
|         | 1.017365234                                                                                                                                                                   | 1           | 0.956341712 | 1.074118929 |             | 1.245840794 1                                                   |
|         | 1.013915182                                                                                                                                                                   | 0.886278778 | 0.932591188 | 1.080410017 | 1           | 0.592701052                                                     |
|         | 1.083745587                                                                                                                                                                   | 1.026736326 | 1           | 1.301991282 | 2.456296099 | 1.998775188                                                     |
|         | 1.115078342                                                                                                                                                                   | 1           | 1.117810873 | 1.148956557 | 1.029450748 | 1.226867934                                                     |
|         | 1.045428906                                                                                                                                                                   | 1           | 0.975475154 | 0.775975619 | 0.911196141 | 0.805592961                                                     |
|         | 0.930240468                                                                                                                                                                   | 1           | 1.224406319 | 0.941220022 | 1.163272899 | 0.904770934                                                     |
|         | 1.232094402                                                                                                                                                                   |             |             |             |             |                                                                 |
| YMR309C | "YMR309C::NIP1::Protein required for nuclear import with some similarity to Nsr1p, another protein involved in nuclear transport"                                             |             |             |             |             | 1                                                               |
|         | 0.790957091                                                                                                                                                                   | 0.540290876 | 0.886880604 | 0.703881093 | 1           | 0.796303539                                                     |
|         | 0.785699796                                                                                                                                                                   | 0.674092915 | 0.614414287 | 1           | 0.55868744  | 0.452540312                                                     |
|         | 0.257146163                                                                                                                                                                   | 0.696094408 | 1           | 0.483831245 |             | 0.580255948 0.381572856 1                                       |
|         | 0.472960957                                                                                                                                                                   |             | 0.531509545 | 0.715396673 | 1           | 0.72539464 0.735709735                                          |
|         | 0.838651175                                                                                                                                                                   | 1.085554943 | 0.706710868 | 1           | 0.688817666 | 0.54838693                                                      |
|         | 0.512046196                                                                                                                                                                   | 0.535139351 | 0.470710814 | 1           | 0.805392943 | 0.676333237                                                     |
|         | 0.986702927                                                                                                                                                                   | 0.848058926 | 0.772733268 | 0.698747933 |             |                                                                 |
| YDR060w | YDR060w::MAK21::essential for 60s ribosome biogenesis; involved in nuclear export of pre-ribosomes                                                                            |             |             |             |             | 1 0.718500371 0.585230509 0.936913249                           |
|         | 0.781540425                                                                                                                                                                   | 1           | 0.726917499 | 0.657854851 |             | 0.706666735 1                                                   |
|         | 0.557697563                                                                                                                                                                   | 0.360559609 | 0.312680469 | 0.911456947 | 1           | 0.464282749                                                     |
|         | 0.37296795                                                                                                                                                                    | 0.323140046 | 1           | 0.446217829 |             | 0.505376915                                                     |
|         | 0.886759808                                                                                                                                                                   | 0.531071397 | 0.787043938 | 0.830908629 | 1.08796343  | 1                                                               |
|         | 1.150089127                                                                                                                                                                   | 0.908136226 | 0.850666803 | 1.306122663 | 1.284915086 |                                                                 |
|         | 0.751078451                                                                                                                                                                   | 0.897345879 | 1.125063585 | 0.610430037 | 0.656447415 | 1.296799097                                                     |
| YMR311C | YMR311C::GLC8::Homolog of mammalian protein phosphatase inhibitor 2.                                                                                                          |             |             |             |             | 1 0.627413102 1.239379468 0.911126612 1.181525079 1 0.788456245 |
|         | 0.821441872                                                                                                                                                                   | 1.475447035 | 1.100792016 | 1           | 0.957258826 | 1.4055011                                                       |
|         | 2.032753616                                                                                                                                                                   | 1.148220693 | 1           | 1.617247452 | 1.537382022 | 1.530957857                                                     |
|         | 1.42173648                                                                                                                                                                    | 1           | 2.223783722 | 2.487030511 | 2.759415849 | 1.535663484 1                                                   |
|         | 0.972722852                                                                                                                                                                   | 1.425230188 | 0.700709889 | 0.428834793 | 0.889857826 | 1                                                               |
|         | 1.597316811                                                                                                                                                                   | 2.564264846 | 2.240634801 | 2.15120259  | 2.761010288 | 1                                                               |
|         | 2.271992238                                                                                                                                                                   | 2.09376679  | 2.007728211 | 1.787687907 | 2.813324988 | 1.58925761                                                      |
| YDR062W | "YDR062W::LCB2::Serine palmitoyltransferase catalyses the committed step in sphingolipid synthesis, the condensation of serine with palmitoyl-CoA to form 3-ketosphinganine." |             |             |             |             | 1 0.91537156 0.623409603 0.972713298                            |
|         | 0.720146728                                                                                                                                                                   | 1           | 0.924669636 | 0.862884302 | 0.67565293  | 0.701486961 1                                                   |
|         | 0.962203219                                                                                                                                                                   | 0.746687825 | 0.494599521 | 0.829485365 | 1           | 0.691007039                                                     |
|         | 0.487508316                                                                                                                                                                   | 0.701749092 |             | 1           | 0.766100487 | 0.399830881 0.434146366                                         |
|         | 0.74174682                                                                                                                                                                    | 1           | 0.964760088 | 0.918181063 | 1.1991452   | 1.446940378                                                     |
|         | 0.990983255                                                                                                                                                                   | 1           | 0.755535856 | 0.568614112 | 0.793362073 | 0.666206315                                                     |
|         | 0.328611556                                                                                                                                                                   | 1           | 0.819469761 | 0.652994726 | 0.831132791 | 0.54610104                                                      |
|         | 0.768750794                                                                                                                                                                   | 0.572658082 |             |             |             |                                                                 |
| YMR313C | YMR313C::YMR313C::molecular_function unknown                                                                                                                                  |             |             |             |             | 1 1.45455044                                                    |
|         | 1.536943545                                                                                                                                                                   | 1.547442756 | 1.477538676 | 1           | 1.575784557 | 1.37487102                                                      |
|         | 1.465130215                                                                                                                                                                   | 1.37859426  | 1           | 1.581572712 | 1.512848807 | 1.444663827                                                     |
|         | 1.615408077                                                                                                                                                                   |             |             | 0.731616088 | 0.702777758 | 1                                                               |

|         |             |                                                                                                                                   |             |             |             |             |             |
|---------|-------------|-----------------------------------------------------------------------------------------------------------------------------------|-------------|-------------|-------------|-------------|-------------|
|         | 1           | 0.953414592                                                                                                                       | 0.845610741 | 0.924121371 | 1.002116868 | 1.05319131  | 1           |
|         | 0.875002086 | 0.843238085                                                                                                                       | 0.767683492 | 0.699003344 | 1           | 1.141676092 |             |
|         | 0.957133391 | 1.031976412                                                                                                                       |             | 1.036793097 | 1.267027951 |             |             |
| YMR313C |             | YMR313C::YMR313C::molecular_function unknown                                                                                      |             |             |             |             |             |
|         |             |                                                                                                                                   |             |             | 1           | 0.913978908 |             |
|         | 0.606145765 | 0.433310245                                                                                                                       | 0.75774621  | 0.655448758 |             |             |             |
|         |             | 1.112414173                                                                                                                       |             | 1.196196275 |             |             |             |
| YDR064W |             | YDR064W::RPS13::Homology to rat S13 1 0.814228834 0.756405547                                                                     |             |             |             |             |             |
|         | 0.648004483 | 0.934621248                                                                                                                       | 1           | 0.751146246 | 0.670221993 | 0.719517309 |             |
|         | 0.762372055 | 1                                                                                                                                 | 0.668786242 | 0.618387891 | 0.676371658 | 0.5880803   | 1           |
|         | 0.921673751 | 0.496657788                                                                                                                       | 0.373641232 | 0.370586138 | 1           | 1.459856218 |             |
|         | 0.913457822 |                                                                                                                                   | 0.837429586 | 1           | 1.091522506 | 1.006168403 |             |
|         | 1.195268286 | 1.075119751                                                                                                                       | 1           | 1.229977053 | 1.500013415 | 0.981695723 |             |
|         | 0.715863671 | 1.396531253                                                                                                                       | 1           | 0.925260886 | 0.991176452 | 0.764777367 |             |
|         | 0.870836178 | 0.868938976                                                                                                                       | 1.025355707 |             |             |             |             |
| YMR315W |             | YMR315W::YMR315W::molecular_function unknown 1 1.047515604                                                                        |             |             |             |             |             |
|         | 1.223115511 | 1.31569594                                                                                                                        | 1.231069893 | 1           | 1.056435995 | 1.292440109 |             |
|         | 1.654283146 | 1.519938392                                                                                                                       | 1           | 1.297969259 | 1.760342458 | 2.691568116 |             |
|         | 1.29641836  | 1                                                                                                                                 | 2.362374693 | 2.816475684 | 4.602509769 | 3.490830235 | 1           |
|         | 1.692954108 | 1.867363685                                                                                                                       | 3.948405909 | 2.92734024  | 1           | 1.145212636 |             |
|         | 1.416301065 | 1.880939692                                                                                                                       | 1.03385047  | 0.949816025 | 1           | 1.171265718 |             |
|         | 1.454947664 | 2.156056556                                                                                                                       | 1.701590112 | 0.975384259 | 1           | 1.328935214 |             |
|         | 1.510761252 | 1.417925672                                                                                                                       | 0.842424737 | 1.877473037 | 1.345834036 |             |             |
| YBL023C |             | YBL023C::MCM2::Member of complex that acts at ARS's to initiate replication 1 1.006185956 1.016739143 1.220578411 1 1.116381202   |             |             |             |             |             |
|         | 1.152115473 | 1.134463668                                                                                                                       | 0.994375584 | 1           | 0.894051375 | 1.128812165 |             |
|         | 0.880817317 | 1.038822172                                                                                                                       |             | 1.264843014 | 0.618645937 |             | 1           |
|         |             | 1                                                                                                                                 | 0.877008288 | 0.982109157 | 0.992003245 | 1.030118518 |             |
|         | 0.950912086 | 1                                                                                                                                 | 1.062504733 | 0.804846983 | 0.988139799 | 0.950906446 |             |
|         | 0.981935156 | 1                                                                                                                                 | 0.658426973 | 0.875968542 | 0.978357623 | 0.733434002 |             |
|         | 0.884951444 | 0.956181415                                                                                                                       |             |             |             |             |             |
| YDR078c |             | YDR078c::SHU2::Suppressor of hydroxy-urea sensitivity 1                                                                           |             |             |             |             |             |
|         | 1.351581586 | 1.035924544                                                                                                                       | 1.346887364 | 1           | 1.051292497 | 1.081486963 |             |
|         | 1.474460097 | 1.336232948                                                                                                                       | 1           | 1.054834588 | 1.332214005 | 2.390759014 |             |
|         | 1.324919204 | 1                                                                                                                                 | 1.172140855 | 1.569566401 | 1           | 1.737887913 |             |
|         | 2.918643345 | 2.530916702                                                                                                                       | 1.765787886 |             | 0.95865921  | 1.007839121 |             |
|         | 0.858777124 | 0.82218263                                                                                                                        | 1.013327463 | 1           | 0.875948864 | 1.040631038 |             |
|         | 1.210296879 | 1.595959445                                                                                                                       | 1           | 0.705572318 | 1.210052201 | 1.256349024 |             |
|         | 0.560058326 | 1.411274225                                                                                                                       | 1.01484825  |             |             |             |             |
| YMR317W |             | YMR317W::YMR317W::molecular_function unknown 1                                                                                    |             |             |             |             |             |
|         | 1.126585455 | 1.443204155                                                                                                                       | 0.993748851 | 1           | 1.449483178 | 1.262275195 |             |
|         | 1.206409659 | 1.228766085                                                                                                                       | 1           | 1.115543088 | 1.285819998 | 1.006479738 |             |
|         | 1.329843798 | 1                                                                                                                                 | 1.047579753 | 1.608453185 | 1.21184364  | 0.627387128 |             |
|         | 1.424940381 | 1.023170409                                                                                                                       | 0.798406153 | 0.742512553 | 1           | 0.870360015 |             |
|         | 0.758368984 | 0.797512369                                                                                                                       | 0.809541635 | 0.726730169 | 1           | 1.05797833  |             |
|         | 1.162067251 | 0.90781386                                                                                                                        | 0.683977302 | 0.92105448  | 1           | 0.820042611 |             |
|         | 1.111272661 | 0.8561411                                                                                                                         | 1.370618814 | 0.899860351 | 1.06651008  |             |             |
| YBL025W |             | YBL025W::RRN10::subunit of UAF (upstream activation factor); involved in promoting high level transcription of rDNA 1 0.958383271 |             |             |             |             |             |
|         | 1.081699867 | 0.998914885                                                                                                                       | 1.060552307 | 1           | 0.942380989 | 0.98464205  |             |
|         | 1.059881928 | 1.132351174                                                                                                                       | 1           | 0.945842533 | 1.121968123 | 1.214351626 | 1           |
|         |             | 1.083957594                                                                                                                       | 1.072075486 | 1.039298546 | 1           | 1.080023956 | 1.369363983 |
|         | 1.029061411 | 1                                                                                                                                 | 0.978247167 | 0.985262842 | 0.969300641 | 1.107454021 |             |
|         | 0.883215316 |                                                                                                                                   | 0.944525281 | 1.146322921 | 1.099915433 | 1           |             |
|         | 1.278219754 | 1.487896607                                                                                                                       | 0.730282149 | 1.304936534 | 0.840599021 |             |             |

YDR080w YDR080w::VPS41::vacuolar protein sorting 0.981335728  
0.928136667 0.785133124 0.966160917 0.945706904 0.752588665  
0.750849764 0.880111383 0.839030382 0.994652856  
1 0.69507491 0.645008092 1 1.14884914  
1.055904576 1.00718727 1.105724409 1 1.183218541  
0.914350562 0.652937267 1 0.968588905 1.317062448 0.738005099  
1.051518745 0.912309412 1.166331183  
YDR080w YDR080w::VPS41::vacuolar protein sorting  
1 0.90315391  
0.974683934 1.158001947 1 1.020230927 0.913813689  
1.047112605 1.178709629 1 1.161146578 0.779255626 1.461147044  
2.5769615  
YNL006W YNL006W::LST8::Required for amino acid permease transport from the  
Golgi to the cell surface 1 1.112607035 1.013300105 1.162442589  
1.142996357 1 1.047979945 1.074799713 1.085788894 1.112459796 1  
0.990765219 1.219090482 1.027647681 1.030184568 1 1.344313587  
1.256347131 1.704993147 1.510140858 1 1.457345238 1.010138723  
0.766580917 1.259320431 1 1.53841379 1.405201914 1.301332756  
1.17726566 1.144211329 1 1.332306061 0.948956954 0.930452685  
0.749964667 0.776726173 1 1.436578615 1.015519219 1.081332782  
1.020923714 1.18202003 1.056002518  
YBL039C YBL039C::URA7::Last step in pyrimidine biosynthesis pathway; URA7 is  
very similar to URA8 CTP synthase 1 1.428162426 0.918892655 1.502242122  
1.054483533 1 1.158521693 0.9302947 1.356939112 1.268911863 1  
0.818464616 0.563498235 0.404961661 1.230466904  
1.056229641 1 0.688464616 0.414276746  
0.666027698 1.229309779 0.807083583 1 0.70794653 0.295320771  
0.326553054 0.634896558 0.417101686 1 0.648416441 0.346963006  
0.73101487 0.651361363 0.268531913 0.757414768  
YDR082w "YDR082w::STN1::involved in telomere length regulation, function in  
telomere metabolism during late S phase" 0.844662869 0.796033783  
1.255677987 0.967221348 0.916521131 0.933624726 1.041434298  
1.064323368 0.852381845 0.859923946 0.726848027 1.323593126 1  
0.914703605 0.808502212 0.793330311 1 0.889534989  
1.170918618 0.838826851 0.774977649 0.90727275 0.827999943  
1.116669677 1 0.858303892 1.080804038 1.115147942 1.170599811  
1.754913483 1 0.997375056 0.964561634 0.149699685 1.452991081  
0.972818213  
YNL008C "YNL008C::ASI3::Amino acid Sensor-Independent (ASI) genes encode  
membrane proteins Asilp, Asi2p and Asi3p. Asilp and Asi3p have conserved  
ubiquitin ligase-like RING domains at their C-termini" 1 1.461733932  
1.25819854 1.423929988 1.324691242 1 1.496813816 1.184120477  
1.202733255 1 1.336819431 1.271128829 1.135888864 1.216816737 1  
1.187283076 1.337530102 1.424792866 0.751700518 1 0.437908671  
0.408607197 0.208984342 1 1.349320442 1.014891427 1.331863521  
1.06693223 0.970509728 0.957799463 1.18668311 0.798084597  
1.042495232 1 0.983725842 1.266404596 0.722163998 0.91475375  
0.57666506  
YNL008C "YNL008C::ASI3::Amino acid Sensor-Independent (ASI) genes encode  
membrane proteins Asilp, Asi2p and Asi3p. Asilp and Asi3p have conserved  
ubiquitin ligase-like RING domains at their C-termini"  
1 1.155612437  
1.301188742 1.360192355 1.295330203 1.113256263 1 1.243728435  
1.089196002 1.622385103 0.992577941 0.767685025 1 1.025224025  
1.089917877 1.305850956 0.910089927 0.823779597 0.868618994

YBL041W YBL041W::PRE7::proteasome subunit 1 0.920401938 0.798849761  
0.844251469 0.871101893 1 0.838144454 0.856911712 0.757524725  
0.856696953 1 1.011228369 0.842894482 0.995790079 0.89980197 1  
1.090255617 1.268406116 1 1.009636025 1.443643734  
1.607174993 1.696804927 1 1.082652797 1.334693523 1.066459348  
0.858062974 0.844402636 1.422266602 1.127848648  
1.226239876 1 1.241705455 1.441120723 1.048159128 0.990089854  
1.17102708 1.208361116  
YDR084c YDR084c::YDR084C::molecular\_function unknown 1 1.013515888  
0.966859624 0.782999177 0.926109828 1 0.738217124 0.81888046  
0.881323626 0.859634676 1 1.052543729 1.04848631 1.17780002  
0.832973184 1 1.22476242 1.007588997 1.018259708 1  
1.78392189 1.641600099 2.14668232 1.393456566 1 1.175531362  
1.430783162 1.263056148 1.197790461 1.063204192 1 0.914556311  
1.281276702 1.22549874 0.977457383 0.928082838 1 1.129225383  
1.253293061 1.006416091 0.945886597 1.151194328 1.107664347  
YBL043W YBL043W::ECM13::ExtraCellular Mutant 1 1.515921  
1.395746305 1.305152776 1.292337968 1 1.248343334 1.428607137  
1.205963513 1.367050326 1 1.206231997 1.343381096 1.38349121  
1.353581653 1 1.311931848 1.016046382 0.736457721 1  
0.778664467 0.727901115 0.943328691 0.911867567 0.712279813  
0.915259926 0.895632182 1 1.078083567 0.881755993  
2.1505863 1 1.336758995 0.967769111 1.199150725  
1.034111939  
YDR086C YDR086C::SSS1::involved in transfer of secretory precursors through  
the endoplasmic reticulum membrane 1 0.903993274 1.2403738 0.797729462  
1.575146029 1 0.74377272 0.77983114 1.365253488 1.253837926 1  
0.892105597 1.120344189 1.279508873 0.979408748 1 0.969801657  
1.697139888 0.676883923 1.234770684 1 1.945760606 2.220507627  
2.051459226 1.53364258 1 0.866319903 0.986278856 0.656568946  
0.717211435 0.955900448 1 0.843540645 1.197593371 0.846214427  
0.950668431 1.52582838 1 0.97139612 1.397531999 0.986822025  
1.556567631 1.35831721 1.407127762  
YBL045C YBL045C::COR1::44 kDa core protein of yeast coenzyme QH2 cytochrome  
c reductase 1 0.931120592 0.915656762 1.174205183 0.780303927 1  
1.294348275 1.435793932 0.695704489 0.803648768 1 0.769976795  
0.684995447 0.599605106 0.826163651 1 0.38306809 0.674177198  
0.65758573 1 0.686691787 0.362951601 0.753768033 1.073552553 1  
0.595073721 0.301905481 0.380252155 0.927983339 0.698712332 1  
0.448772487 0.113491144 0.110229072 0.229506 0.524456939 1  
0.398322687 0.154406079 0.374920729 0.639546979 1.30439548 0.694369817  
YDR088C YDR088C::SLU7::Involved in 3' splice site choices and acts in  
concert with Prp18 during the 2nd step of splicing. 1 0.602236469  
0.878360084 0.986041547 1 0.677591498 0.696506374 0.857852291  
0.801230587 1 0.80704134 0.921928892 0.957669298 1  
0.9723449 1.133062498 0.984819117 1 1.840441778 1.57721099  
1.670322314 1 0.923014755 1.026025951 0.847305325 0.884035514  
1.09527173 1 0.981667496 1.04419966 0.995792466 1.258673214  
1.249793709 1 1.035925481 1.134438738 1.180335065 1.071581591  
1.36300985 1.169833634  
YBL047C YBL047C::EDE1::EH domain protein involved in endocytosis  
1.116777315 0.986216384 1.141627097 0.711710461 0.785762459  
0.986347038 0.95928549 1.03656268 0.854221753  
1.07003503  
0.912937119 0.807691497 0.833327833 0.784265007 0.906338929 1  
1.173138793 1.321298927 1.074890277 0.823235852 1.211965049 1  
0.910086151 1.235367117 0.967234954 1.33313658 0.900771805 1.163704293



YDR102C YDR102C::YDR102C::molecular\_function unknown 0.980104457  
0.988493991 1.014158428 0.988758681 1.101677169 0.996384926  
0.985025691 0.999468923 1.010119717 0.709319554 1.161080944 1  
0.818333687 1.777763965 1.583508699 1.453709562 1 0.749566705  
0.699967832 1 0.78530074 0.92120314 0.827583681 0.823692535  
0.934248566 1 0.967918645 1.132202354 1.791775217 1  
1.201952639 0.699811482 1.644834315 0.90276836  
YBL049W YBL049W::YBL049W::molecular\_function unknown 1 1.134340238  
1.133944663 1.118331422 1.046582654 1 1.082696055 1.139671775  
1.094654515 1 1.031656209 1.119015129 1.477831869 1.118408453 1  
1.168998898 1.085044269 1.126348112 1.232686378 1 1.55519208  
1.277082936 1.521448411 1.650798735 1 0.821975729  
1.014523314 1 0.781937639 1.103936959 1.281426269 1.620916643  
0.6633797 0.897756952 1.36860028  
YBL063W YBL063W::KIP1::Mitotic spindle assembly 1 1.181098396  
1.080777268 1.48714369 0.943505186 1 1.151767857 1.272801558  
1.293507316 1 1.179728209 1.389982554 0.851962811 1.399746292 1  
1.473431595 1.274372669 0.525401841 1 0.543286162 0.551568737  
0.260204326 0.371557773 1 0.859721246 0.902184692 0.851867112  
0.975884866 1.051701701 0.814132559 0.943106915  
0.712010268 1 0.935565008 0.86559239 1.040519483 0.732668496  
0.919142604 0.740777918  
YBL065W YBL065W::YBL065W::molecular\_function unknown 1 0.963032355  
1.113724358 1.113413932 1.139814383 1 1.007694957 1.29892938  
1.094081183 1 1.084626383 1.242798917 1.633784267 1.177018924 1  
1.375476137 1.176817633 1.531289152 1.620546684 1 2.042747817  
2.391785433 2.891398348 1.740491797 1 0.985691624 0.832283912  
0.892126186 0.920755949 0.924426572 1 0.718647631 0.723173111  
0.829180663 0.957960258 0.991516683 0.841980512 0.89306598  
1.05833135 0.092489398 1.038786826 1.137435598  
YNL010W YNL010W::YNL010W::molecular\_function unknown 1 1.034292023  
0.978060725 0.84567824 1.633420437 1 0.952429333 0.86060444  
1.045078766 1.121152997 1 0.750412576 0.859723621 0.666220684  
0.905312317 1 1.486182473 0.96663357 0.811213314 0.958393368 1  
1.497978695 1.094299269 1.041428195 1.288156467 1 1.190685897  
1.154636511 0.91041947 1.103724813 0.960472246 1 0.988047535  
1.386864541 0.995260526 0.864454902 1.612796088 1 1.072692708  
1.265956082 0.866180912 1.684512826 1.417709715 1.293296646  
YNL012W "YNL012W::SPO1::dispensable for mitosis, premeiotic DNA synthesis,  
synaptonemal complexes, and recombination, but required for meiotic spindle pole  
body duplication/separation, meiosis I, meiosis II, and spore formation" 1  
1.579499983 1.275939106 1.449621405 1.394767854 1 1.544865509  
1.503442518 1.417613541 1.214052142 1 1.260305988 1.475206578  
1.543693516 1.070145443 1 0.708004787 1.423478846  
0.329459252 1 1.229479623 1.023271868  
1.055880911 1 0.844694425 0.915834345 0.983311335 0.994248371  
1.021113437 1 0.987861463 1.203394052 1.169257022 1.368726908  
1.128679366  
YNL014W YNL014W::HEF3::Translational elongation factor EF-3B 1  
1.368668292 1.323759455 1.235618067 1.553839422 1 1.418391634  
1.213820706 1.472533375 1 1.052639029 0.980006574 0.869519303  
1.280859197 1 0.761246737 0.423344873 0.479386098 0.840062263 1  
0.965543516 1.103416345 0.783549171 0.88791637 1 0.806749321  
0.521512609 0.87120341 1.170732005 1.031716585 1 0.937314416  
0.627496895 0.648420522 0.573680478 0.644448698 1 1.139014939  
0.870956625 0.853095101 1.299705731 0.747602391 0.92816139

YNL016W YNL016W::PUB1::poly(A)+ RNA-binding protein 1 1.281881205  
1.326035101 1.4241708 1.441688202 1 1.313068037 1.322045109  
1.340436395 1.309035605 1 1.206181489 1.322007861 1.265704809  
1.447204616 1 0.5419172 0.621510773 0.510848575 0.702519513 1  
0.766436033 0.80703225 0.570686131 1.355577435 1 1.080512059  
0.816107458 1.350202536 1.705602563 1 1.163845351 0.970851503  
1.030184872 0.691972258 0.367812501 1 1.536686391 1.436426969  
1.443276463 1.421381622 0.980029174 0.996460122  
YDR104C YDR104C::SPO71::Product of gene unknown 1 1.028908549  
0.99577958 1.055780375 1 0.995165654 1.168284413 0.995424309  
1.007125211 1 1.074818272 1.227526238 0.969835629 1.459819175 1  
0.640090173 1.010161163 0.716648915 0.519218493  
1 1.108230238 1.171509618 1.11988396 1.273919597 1.226919265 1  
0.950249572 0.903377506 0.923288794 1.001526711 0.577438454 1  
0.823705629 0.906488872 0.970213853 0.759624818 1.013655872 0.83446968  
YNL030W YNL030W::HHF2::Histone H4 (HHF1 and HHF2 code for identical  
proteins) 1 1.159555101 1.578733774 0.971250331 2.382146704 1  
1.049898969 1.100247052 1.778681669 1.746641123 1 0.944986927  
1.013110926 1.049223155 1.364322213 1 0.912619926 0.463340424  
0.361792528 1.011881606 1 1.848476659 1.826309522 1.020317207  
1.125400569 1 0.80347481 0.798500089 0.523668812 0.773959932  
1.190840912 1 0.59754482 0.981963796 0.77691497 1.16219355  
1.5761764 1 0.619568102 1.144974332 1.16689059 2.019441801  
1.744200155 1.736362427  
YDR106W YDR106W::ARP10::actin-related protein 1 1.219372798  
1.161049642 1 0.964253181 1.031757111 1.139592954 1  
1.225185929 1.419581469 1.189282114 1 0.61311149 1.594021576  
1.322524946 1 1.74871553 0.779481295  
0.862415715 0.919396686 1 0.978238749 1.46295903  
1.215058002 1.709932581 1 0.793611711 0.919511937 0.357745083  
0.847604027  
YNL032W YNL032W::SIW14::Synthetic interaction with Whi2 1 0.742955792  
0.914358931 0.805799981 1.120032765 1 0.74040951 1.103749271  
1.001878664 1 0.826632231 0.814790739 0.925873288 0.856982134 1  
1.216826617 0.930576395 1.104973941 1.275694133 0.617008477  
1.019815729 0.643328824 0.487036047 1 1.008948489 1.036669477  
0.695923792 0.717796811 0.965302059 1 0.771116462 1.000552352  
0.980669648 0.819059332 1.307866507 0.92833746 1.142725022  
0.93112307 1.029375375 1.119923134  
YDR108W YDR108W::GSG1::Probably has role late in meiosis following DNA  
replication 1 0.819732075 0.671498482 1.134375642 0.69804605 1  
0.856143107 0.858671196 0.84502575 1 0.885500868 0.754978272  
0.620826088 0.909286853 1 0.596628083 0.607551355 0.58752305  
0.699857459 1 0.933644615 1.269398868 0.710148335  
1.03055868 1.172590919 0.903231438 1.008543107 1 1.006709116  
0.990729877 1.1615168 0.98366964 0.939101953 1 1.03070412  
0.888491096 0.921289083 0.673124068 0.938397528 0.815205939  
YNL034W YNL034W::YNL034W::molecular\_function unknown 1 1.468823748  
1.443627778 1.357961777 1.481595355 1 1.531304518 1.190204665  
1.54394497 1 1.36024377 1.314976237 1.348655677 1.302930067  
0.658946932 0.622511538 0.851041655 0.533616028 1 0.848006714  
0.807552979 0.782905034 0.905674609 1.029667445 1  
0.738424492 0.624957332 0.743679757 0.855461083 0.96998889 1  
0.930898286 0.597628513 0.529752537  
YBL067C YBL067C::UBP13::similar to Ubp9p 1 0.949229474 0.781697756  
1.193901735 0.940362173 1 1.120555139 0.853561986 0.976395247  
0.90922366 1 1.088501856 0.968038798 0.692518516 1.151260957 1

|             |                                                                                                                             |             |             |             |             |             |             |
|-------------|-----------------------------------------------------------------------------------------------------------------------------|-------------|-------------|-------------|-------------|-------------|-------------|
| 0.711626247 |                                                                                                                             | 0.8420466   |             | 0.779991909 |             | 1           |             |
| 0.805821407 | 0.6999282                                                                                                                   | 0.84244038  | 0.873722403 | 0.801998569 | 1           |             |             |
| 0.893856035 | 0.693063373                                                                                                                 | 0.753905747 | 0.729539469 | 0.578937328 | 1           |             |             |
| 1.057107489 | 0.787952521                                                                                                                 | 1.021097801 | 0.451360561 | 0.801838057 | 0.696996707 |             |             |
| YDR110W     | YDR110W::FOB1::The gene product is essential for both DNA replication fork blocking and recombinational hotspot activities. |             |             |             |             | 1           |             |
| 0.738565105 | 0.688764797                                                                                                                 |             | 0.719410129 | 1           | 0.715907603 | 0.751738421 |             |
| 0.804181787 | 0.949262257                                                                                                                 | 1           | 0.634064656 | 0.575066362 | 0.611248934 |             |             |
| 0.940679233 | 1                                                                                                                           | 0.374970615 |             | 0.496207951 | 1           | 0.711884913 |             |
| 0.662037087 | 0.40503978                                                                                                                  | 0.820731636 | 1           | 0.823502959 | 0.772705307 |             |             |
| 0.977618111 | 1.139202834                                                                                                                 | 1.235408026 | 1           | 0.765527575 | 0.668791568 |             |             |
| 0.767946286 |                                                                                                                             | 0.715880667 | 1           | 0.619493981 | 0.556343626 | 0.819619847 |             |
| 0.577564548 | 0.792511092                                                                                                                 | 0.619066183 |             |             |             |             |             |
| YNL036W     | YNL036W::NCE103::endogenous substrate for nonclassical export (Cleves et al. J Cell Biol 1996 133:1017-26).                 |             |             |             |             | 1           |             |
| 1.320195921 | 1.895011902                                                                                                                 | 1           | 1.820113025 |             | 1.433790543 | 2.645468369 |             |
| 4.151622586 | 3.559333306                                                                                                                 | 6.492832197 | 1.465154799 | 1           | 3.954686419 |             |             |
| 7.207107246 | 3.814183813                                                                                                                 | 2.143862749 | 1           | 11.75364165 | 16.93461281 |             |             |
| 15.17667632 | 5.569253775                                                                                                                 | 1           | 3.341626741 | 4.755595647 | 1.87099777  |             |             |
| 1.216413561 | 0.904603194                                                                                                                 | 1           | 1.415296476 | 3.900729558 | 3.403342603 |             |             |
| 3.9151907   | 4.851270082                                                                                                                 | 1           | 1.994371816 | 3.393153371 | 5.37829154  |             |             |
| 4.709946145 | 8.394237608                                                                                                                 | 1.096281225 |             |             |             |             |             |
| YBL069W     | YBL069W::AST1::Protein involved in targeting of plasma membrane [H+]ATPase                                                  |             |             |             |             | 1           |             |
| 1.09279265  | 0.966318094                                                                                                                 | 0.982944226 | 0.857900175 | 1           | 0.967792317 |             |             |
| 0.959716195 | 0.785773967                                                                                                                 | 0.903180443 | 1           | 0.858035883 | 0.753192546 |             |             |
| 0.735643751 | 0.714116547                                                                                                                 | 1           | 1.264846504 |             | 0.874609375 | 0.911270806 |             |
| 1.049888249 | 0.894751291                                                                                                                 | 0.916252802 | 1.154899661 | 0.895423499 | 1           |             |             |
| 1.047204913 | 0.873323451                                                                                                                 | 0.763052409 | 0.850883067 | 0.681863552 | 1           |             |             |
| 0.950589359 | 0.878559067                                                                                                                 | 0.898970484 | 0.52284403  | 0.96857646  | 0.843225912 |             |             |
| YDR112W     | YDR112W::YDR112W::molecular_function unknown                                                                                |             |             |             |             | 1           | 1.125396287 |
| 0.91333202  | 1.396564302                                                                                                                 | 0.669614811 |             | 1.372965484 | 1.22469594  |             |             |
| 0.858587043 | 0.80536687                                                                                                                  |             | 1.481721695 | 0.996369384 | 0.518843311 |             |             |
| 1.125837327 | 1                                                                                                                           | 0.398066097 |             | 0.349443214 | 1           | 0.695354501 |             |
| 0.724336755 | 0.672496803                                                                                                                 | 0.638147296 | 1           | 0.854106821 | 0.690388572 |             |             |
| 1.185627059 | 1                                                                                                                           | 1.079346271 | 0.464462455 | 0.621426084 | 0.887043131 |             |             |
| 0.553787543 |                                                                                                                             | 0.916974711 | 0.37662847  | 1.05937409  |             | 0.80350104  |             |
| 0.593673049 |                                                                                                                             |             |             |             |             |             |             |
| YNL038W     | YNL038W::GPI15::Glycosyl Phosphatidyl Inositol                                                                              |             |             |             |             | 1           | 1.048335962 |
| 1.180082083 | 0.906727734                                                                                                                 | 1.374272866 | 1           | 0.932776988 | 0.857627254 |             |             |
| 1.220282254 | 1.09866583                                                                                                                  | 1           | 0.814935265 | 1.005986849 | 1.044681104 |             |             |
| 0.931109228 | 1                                                                                                                           | 1.018944614 | 0.772994487 | 0.773315739 | 1.237269974 | 1           |             |
| 1.461397768 | 1.30266833                                                                                                                  | 1.10911526  | 0.826506618 | 1           | 0.891096442 |             |             |
| 1.036224796 | 0.71444145                                                                                                                  | 0.708163626 | 0.972672887 | 1           | 0.994644605 |             |             |
| 1.256540723 | 1.284871577                                                                                                                 | 1.387840825 | 1.733465341 | 1           | 1.106826463 |             |             |
| 1.470156863 | 1.297086044                                                                                                                 | 2.017810258 | 1.487988505 | 1.534093225 |             |             |             |
| YBL071C     | YBL071C::YBL071C::molecular_function unknown                                                                                |             |             |             |             | 1           | 1.213334656 |
| 1.17585426  | 1.074123885                                                                                                                 | 1.431874972 | 1           | 0.894431381 | 0.947582005 |             |             |
| 1.563509238 | 1.589552682                                                                                                                 | 1           | 1.001252816 | 0.891523042 | 1.293477501 |             |             |
| 1.281432984 | 1                                                                                                                           | 0.833058268 | 0.705244884 | 0.738490942 | 1.217160869 | 1           |             |
| 1.182120942 | 1.295910329                                                                                                                 | 1.427463928 | 0.905917833 | 1           | 0.807990218 |             |             |
| 0.757353021 | 0.721606827                                                                                                                 | 0.7720396   | 0.746237929 | 1           | 0.673265183 |             |             |
| 1.056382015 | 0.78383321                                                                                                                  | 1.315807966 | 1.586618349 | 1           | 0.655321085 |             |             |
| 0.980104605 | 1.002875169                                                                                                                 | 1.170495115 | 0.686985989 | 1.25914728  |             |             |             |
| YDR126W     | YDR126W::SWF1::Spore Wall Formation                                                                                         |             |             |             |             | 1           | 1.119876476 |
| 0.883758435 | 1                                                                                                                           | 0.945372765 | 0.855524137 | 0.793565831 | 0.891941438 | 1           |             |
| 0.96939048  | 0.944613506                                                                                                                 | 1.054915998 | 1.00786513  | 1           | 0.838025183 |             |             |

|         |                                                             |             |             |             |             |             |             |
|---------|-------------------------------------------------------------|-------------|-------------|-------------|-------------|-------------|-------------|
|         | 0.750303314                                                 | 0.840481124 | 1           | 1.146832301 | 1.645047934 |             |             |
|         | 1.016972934                                                 | 1           | 1.113776485 | 1.009623677 | 1.085768012 | 1.183695724 |             |
|         | 0.950503556                                                 | 1           | 0.765443936 | 0.804134009 | 1.110838567 | 0.553747323 |             |
|         | 0.842513027                                                 | 1.127201329 | 0.557512642 | 0.962868298 | 0.805574095 |             |             |
| YNL040W | YNL040W::YNL040W::molecular_function unknown                |             |             |             |             | 1           | 0.813569744 |
|         | 0.73785055                                                  | 1.043141472 | 0.897380418 | 1           | 0.908791702 | 0.961716856 |             |
|         | 0.814239094                                                 | 0.93957687  | 1           | 0.782171825 | 0.924301004 | 0.637104806 |             |
|         | 1.147933069                                                 | 1           | 1.473640254 | 1.292545309 | 1.188440835 | 1.271344518 |             |
|         | 1.603710205                                                 | 1.080566354 | 0.78433469  | 1.528577321 | 1           | 1.012520638 |             |
|         | 0.893539371                                                 | 0.989082244 | 1.195359124 | 1.147521472 | 1           | 1.00113873  |             |
|         | 0.694807322                                                 | 0.842391253 | 0.73534983  | 0.846505201 | 1           | 0.878960913 |             |
|         | 0.779141407                                                 | 1.048638503 | 0.860942194 | 1.083518292 | 1.12167436  |             |             |
| YBL073W | YBL073W::YBL073W::molecular_function unknown                |             |             |             |             | 1           | 1.113200234 |
|         | 1.059745375                                                 | 0.936913249 | 0.920962498 | 1           | 0.955320943 | 1.029945068 |             |
|         | 1.006350273                                                 | 0.93349752  | 1           | 0.98321457  | 1.057503936 | 0.83639148  |             |
|         | 0.85619367                                                  | 1           | 0.782958118 | 0.474625538 | 0.75290328  | 0.73102205  |             |
|         | 1.180664595                                                 | 1.410513546 | 0.935998666 | 0.951360683 | 1           | 0.926423727 |             |
|         | 0.904002667                                                 | 0.899761555 | 0.920761091 | 0.911544352 |             |             |             |
|         | 0.938488374                                                 | 1.126711553 | 1           | 1.095340689 | 1.138711397 | 1.373162626 |             |
|         | 0.647143341                                                 | 1.149775936 | 0.999087012 |             |             |             |             |
| YDR128W | YDR128W::YDR128W::molecular_function unknown                |             |             |             |             | 1           | 0.81063402  |
|         | 0.721835043                                                 | 0.911918225 | 0.508272032 | 1           | 0.960359951 | 0.999556873 |             |
|         | 0.695561368                                                 | 0.557519136 | 1           | 1.071945282 | 0.877126184 | 0.460930371 |             |
|         | 0.907848844                                                 | 1           | 0.756146641 | 0.823913285 | 0.594082472 | 1           |             |
|         | 0.615888692                                                 | 0.773746757 | 0.681821284 | 0.848838872 | 1           | 0.831542161 |             |
|         | 0.850043941                                                 | 1.087253726 | 0.992692358 | 1           | 0.91913387  | 0.640915421 |             |
|         | 1.078668048                                                 | 1.415995943 | 0.601450588 | 1           | 0.844348972 | 0.741567274 |             |
|         | 1.056388253                                                 | 0.37955174  | 0.802548461 | 0.692618592 |             |             |             |
| YBL087C | YBL087C::RPL23A::Homology to E. coli L14 and rat L23        |             |             |             |             | 1           |             |
|         | 1.738701196                                                 | 1.939361828 | 1.344706402 | 1.597803811 | 1           | 1.271760874 |             |
|         | 1.170304595                                                 | 1.503593328 | 1.531159196 | 1           | 1.157391515 | 1.278409308 |             |
|         | 1                                                           | 0.791128675 | 0.366038485 | 0.47637775  | 1           | 1.044251139 |             |
|         | 1.159810505                                                 | 0.613569678 | 1           | 1.361608313 | 1.121953238 | 1.140573755 |             |
|         | 1.276373042                                                 | 1.538292752 | 1           | 1.092743764 | 1.241727507 | 0.854248928 |             |
|         | 0.537281152                                                 | 1.256280323 | 1.129458364 | 1.102779582 | 0.901927725 |             |             |
|         | 1.51528464                                                  | 0.999964678 | 1.093654335 |             |             |             |             |
| YDR130C | YDR130C::FIN1::Cell cycle-dependent filament between nuclei |             |             |             |             | 1           |             |
|         | 0.655959601                                                 | 0.978120364 | 0.908770617 | 1.007145051 | 1           | 0.824034413 |             |
|         | 0.830505962                                                 | 0.82770188  | 1           | 0.97228856  | 1.052663999 | 0.699750814 |             |
|         | 1.214553411                                                 | 1           | 1.109658139 | 0.753074408 | 1           |             |             |
|         | 0.72756112                                                  | 1.327631257 | 0.947250932 | 1.059090178 | 1.055699906 |             |             |
|         | 0.788054251                                                 | 0.839634627 | 1.029594248 | 1           | 1.178458234 | 1.119045223 |             |
|         | 1.368783478                                                 | 1.467456595 | 1.500483126 | 1           | 0.885871962 | 0.827709337 |             |
|         | 0.983054594                                                 | 0.363331233 | 1.277410937 | 0.93253961  |             |             |             |
| YBL089W | YBL089W::YBL089W::not yet annotated                         |             |             |             |             | 1           | 1.428411575 |
|         | 1.003668813                                                 | 1           | 1.058885641 | 1.134129706 | 1           | 1.311327777 |             |
|         | 1.231016096                                                 | 1.031694259 | 1.173619667 | 1           |             | 0.814565772 |             |
|         | 0.472651788                                                 |             |             | 0.973495616 | 0.73171881  |             |             |
|         | 1.295325447                                                 | 0.879365396 | 1           | 1.149058002 | 1.095267322 | 1.431587585 |             |
|         | 1.014994479                                                 | 1.233466923 | 1           | 0.94184602  | 1.313491555 | 1.119107408 |             |
|         | 0.695671496                                                 | 1.13486083  | 0.972818213 |             |             |             |             |
| YDR132C | YDR132C::YDR132C::molecular_function unknown                |             |             |             |             | 1           | 0.845893115 |
|         | 0.781312602                                                 | 0.929062852 | 1           | 0.764510139 | 0.74340091  |             |             |
|         | 0.855798543                                                 | 1           | 2.578570655 | 2.064393104 | 1.011619421 | 1           |             |
|         | 3.692251406                                                 | 1.580905918 | 1.532392183 | 1           | 3.053873859 | 4.070877725 |             |
|         | 2.108339158                                                 | 1.846932635 | 1           | 3.010074557 | 3.19614566  | 2.162499116 |             |
|         | 1.189314759                                                 | 1.177179115 | 1           | 3.44881571  | 3.798050121 | 3.944451244 |             |

2.86221448 1.261412624 1 4.030839903 3.700352884 1.818966486  
 0.968210945 1.16851816 1.09453  
 YBL091C YBL091C::MAP2::methionine aminopeptidase 2 1 0.862056018  
 0.913944768 0.806786405 0.717301997 1 0.75973978 0.767983173  
 0.869674623 0.983983489 1 0.745317292 1.010357857 0.837726644  
 1.07460781 1 0.501015158 0.383930807 0.459301594 0.526133399 1  
 1.922530579 0.92124439 1.907568054 1.541733245 1 1.249572303  
 1.167674815 1.598003705 1.216408736 1.400986886 1 1.100325634  
 1.199886057 1.405908484 1.110681449 0.675735942 1 1.035384063  
 1.052406823 1.156302486 0.766563041 0.899772055 0.857235872  
 YDR134C YDR134C::YDR134C::molecular\_function unknown 1 1.598285521  
 1.372588409 0.791876996 1.340277807 1 0.993855569 0.900593685  
 0.996064452 1.02060402 1 1.244224869 1.045508566 1.719340392  
 0.837922466 1 0.767536811 1.246507726 1.040119258 1  
 0.969572726 0.8640629 0.795323569 0.525163106 1 1.001006332  
 0.644069688 0.786912289 1.003165169 0.835005053 1 0.685885103  
 0.761418756 0.438882612 0.304317295 0.636677255 1 0.981769985  
 0.934291631 0.703349425 1.419141962 1.150573378 1.183843646  
 YBL093C YBL093C::ROX3::RNA polymerase II holoenzyme/mediator subunit  
 0.966560327 0.862085259 0.715613424 0.826249818 0.760337209  
 0.668914668 0.895686479 0.914401158 0.658275077 0.918098325  
 0.739702297 0.953535264 0.600311802  
 1 0.928321847 1.011584714 0.970945683 1.030602967  
 1.178682033 1 0.856399459 1.347919623 1.076625551 1.194736385  
 1.46039497 1 1.032162852 1.261532193 1.228534943 1.186682695  
 0.907065661 0.800320314  
 YBL095W YBL095W::YBL095W::molecular\_function unknown 1.212817713  
 0.93724723 0.960368595 1.032750966 0.887492687 1.07190884  
 1.144860055 1.104358922 0.982619114 1.026000973 1.166954919 1  
 1.275578998 1.190807635 1.115358287 0.927978313 1 0.935468327  
 0.999493001 0.703484851 1.000786969 1 0.855580149 0.827837955  
 0.938422201 0.892535982 0.912508182 1 0.64992611 0.717128752  
 0.540719893 0.759038331 0.803188401 1 0.839075574 0.871890233  
 0.90268902 0.993580014 0.830493828 0.887882787  
 YBL097W "YBL097W::BRN1::BaRreN, a gene with sequence similarity to  
 Drosophila barren and Xenopus XCAP-H, and a functional homolog of human BRRN1"  
 1 0.940963152 1.033754181 1.307774677 1.003531608 1 1.167132306  
 1.196245413 1.164192082 0.757021263 1 1.168065972 1.045275577  
 1.398477574 0.985512807 1 0.580693519 0.508595775 0.53564253 1  
 1.044597407 0.939964593 0.968606824 0.839865095 1 0.998048152  
 1.067015386 1.227540755 1.260305606 1 0.692102146 0.721455938  
 0.812224853 1.227555836 1.093475093 1 0.519979093 0.530561272  
 0.758255278 0.492296511 0.689613298 0.995584457  
 YNL054W YNL054W::VAC7::Integral 128-kDa vacuolar membrane protein; may  
 function to regulate Fab1 kinase activity. 1 1.150083407 1.091821984  
 1.41771685 1.086095365 1 1.431184135 1.168746367 1.075221736 1  
 1.141782658 1.291631123 0.93361868 1.354467558 1 0.988991654  
 0.986430121 0.566155154 1 1.001560732  
 1.027030689 1.135397648 0.998139466 0.943285434 1 1.202033857  
 1.071254144 0.908040543 1.036841281 0.87699413 1 0.994263616  
 0.975736256 1.145562523 0.933808037 0.924670386 0.95793264  
 YNL056W YNL056W::YNL056W::molecular\_function unknown 1 1.245689258  
 1.363849909 1.045366273 1.689384757 1 1.074836691 1.093473732  
 1.634990736 1.4337852 1 1.029709033 1.283821907 1.980361108  
 1.239698741 1 1.408488008 1.110598632 1.226309711 1.590607927 1  
 1.179972163 2.288649438 1.716227453 0.969135146 1 0.991601557  
 1.012817889 0.725740157 0.87501222 0.937418728 1 0.894583666

1.000863491 0.821072978 1.719153812 1 1.265083105 1.185984859  
1.009108195 1.800377915 1.503780876 1.507824531  
YNL058C YNL058C::YNL058C::molecular\_function unknown 1 0.965580407  
1.071678953 0.987362492 1.154722368 1 0.993679255 0.984069411  
1.036208075 0.919739284 1 1.041302965 1.088532185 1.187546578  
0.692006191 1 1.548054482 1.4517557 1.854036392 1.022689366 1  
0.617752129 1.067491908 0.952661942 0.43300579 1 1.116100379  
1.206278149 0.68730918 0.833983048 0.733594115 1 0.9451331  
0.671569568 0.389194114 0.626889298 2.124033298 1 1.120806756  
1.066575081 1.200850541 1.267364361 1.521374093 0.980698884  
YDR136C YDR136C::VPS61::Vacuolar Protein Sorting 1 1.618378072  
1.59039118 1.553734371 1 1.569474534 1.907476118  
1.4107315 1 1.616350772 1.793411114 1.712571877  
0.398346451 0.638012252 0.558371378 1  
0.712570363 0.674074419 0.740785322 0.778790172  
0.78863285 0.772494567 0.948649097 0.823022556 1 0.868973028  
0.843268729 1.03696184 0.844657555 0.784206449 1.029733823  
YNL062C YNL062C::GCD10::First identified as negative regulator of GCN4  
expression 1 0.862779997 0.543151094 0.784413731 0.716358565 1  
0.675337403 0.611774351 0.67414122 0.870226639 1 0.531694342  
0.393901671 0.434228326 0.997805519 1 0.357177948 0.357610841  
0.70312922 1 0.736416334 0.461655306 0.982410957 1  
0.858773125 0.519843118 0.84700515 1.012812304 0.874194463 1  
0.788537511 0.648950257 0.530802382 0.902890398 0.739922386 1  
0.553183273 0.714238565 0.970242867 0.714531026 0.540235914 0.757414768  
YDR150W "YDR150W::NUM1::May function in nuclear migration during mitosis and  
meiosis by affecting astral microtubule functions, perhaps by being involved in  
polymerization and stabilization of microtubules" 1 1.374572806  
1.005146524 0.992856476 1 1.209345399 1.192530127 0.929134746  
0.93058224 1 1.333612542 1.233494651 0.828406026 1.229216371  
1 0.985812356  
0.707848929 0.831018628 1.147575961 0.831923176 1 0.90918925  
1.043055263 0.766026988 0.507963925 1.143368293 1 0.788615853  
0.986427913 0.591188006 1.24837893 0.866306262  
YNL064C YNL064C::YDJ1::yeast dnaJ homolog (nuclear envelope protein); heat  
shock protein 1 1.027434999 0.880984283 1.104080394 0.990480137 1  
0.856633067 0.948039605 0.858004244 0.878808823 1 0.676972678  
0.68861289 0.715071947 1.016879692 1 0.61274364 0.545691145  
0.913571228 1.242444483 1 0.833181451 0.622002971 1.005382119  
1.556099568 1 1.166390423 0.767620015 0.683974823 0.828646554  
0.867231028 1 1.563168081 0.678233425 0.293362586 0.348109214  
0.779797587 1 1.44698043 0.661386562 0.613640175 0.876176142  
0.794917019 1.181216756  
YDR152W YDR152W::YDR152W::molecular\_function unknown 1 0.836988134  
0.963713819 1.119077205 1 0.730073943 0.746643716  
1.134457624 1 0.788327815 0.746391506 0.810563734 1.054815208 1  
0.621053462 0.524084024 0.643771895 1 0.888994614 0.956964995  
0.762759097 0.939471125 1 1.002590526 0.854650525 0.728447114  
0.676985152 0.973012303 1 0.992242122 1.091604195 0.922350749  
1.222384393 1.552889959 1 1.037784725 0.965526604 0.868375493  
1.049395505 0.807888962 1.029733823  
YNL078W YNL078W::NIS1 1 0.748990584 0.670450573 0.722256535  
0.426730012 1 0.838571521 0.874045616 0.553615192 0.638964427 1  
0.686186611 0.779574907 0.698520976 0.564562794 1 0.795032401  
0.985950888 0.75404524 0.596477984 1 0.543378973 0.592339487  
0.678167389 1 0.832360514 0.924121331 0.861935655 0.839144301 1

|         |                                                                                                                                                                                  |             |             |             |             |             |             |
|---------|----------------------------------------------------------------------------------------------------------------------------------------------------------------------------------|-------------|-------------|-------------|-------------|-------------|-------------|
|         | 0.661005845                                                                                                                                                                      | 0.638389462 | 0.726231845 | 0.586006223 | 0.999811957 | 1           |             |
|         | 0.540598029                                                                                                                                                                      | 0.591118072 | 1.115952579 | 0.331979291 | 0.75911303  | 0.626946802 |             |
| YBL109W | YBL109W::YBL109W::molecular_function unknown                                                                                                                                     |             |             |             |             | 1.106926999 |             |
|         | 0.912193217                                                                                                                                                                      | 0.724437069 | 0.960107283 | 0.786441535 | 0.849312144 |             |             |
|         | 0.723591173                                                                                                                                                                      | 1.025992845 | 1.082044493 | 1.445516129 | 0.76654838  | 1           |             |
|         | 1.041995264                                                                                                                                                                      | 1.067680191 | 1.703743435 | 0.808618643 | 1           | 0.409242121 |             |
|         | 0.787329216                                                                                                                                                                      | 1           | 0.72328526  | 0.727974705 | 0.757095389 |             |             |
|         | 0.893677748                                                                                                                                                                      | 0.861611404 | 1           | 0.711733782 | 0.588880692 | 0.562187173 |             |
|         | 0.771573283                                                                                                                                                                      | 0.766450287 | 1           | 0.770271712 | 1.142450556 | 0.578366525 |             |
|         | 0.970799876                                                                                                                                                                      | 0.945673958 |             |             |             |             |             |
| YDR154C | YDR154C::YDR154C::molecular_function unknown                                                                                                                                     |             |             |             |             | 1           | 1.427397952 |
|         | 1.655922366                                                                                                                                                                      | 0.873066569 | 1.283091435 | 1           | 0.966256848 | 1.099755839 |             |
|         | 1.528975853                                                                                                                                                                      | 1.368911191 | 1           | 1.520932307 | 1.580132573 | 3.461978168 |             |
|         | 1.198616488                                                                                                                                                                      | 1           | 1.202510981 | 1.778759913 | 2.292011062 | 2.675963765 | 1           |
|         | 1.121393865                                                                                                                                                                      | 2.646577814 | 3.486765223 | 2.081533335 | 1           | 0.860597574 |             |
|         | 0.979210489                                                                                                                                                                      | 1.078328631 | 0.750967537 | 0.683680833 | 1           | 1.104446711 |             |
|         | 2.043883793                                                                                                                                                                      | 1.300043899 | 0.712983847 | 1.050498984 | 1           | 1.146140136 |             |
|         | 2.115775728                                                                                                                                                                      | 1.268850289 | 1.289922951 | 1.217838797 | 1.496441408 |             |             |
| YNL080C | YNL080C::YNL080C::molecular_function unknown*                                                                                                                                    |             |             |             |             | 1           | 1.577918597 |
|         | 1.024725348                                                                                                                                                                      | 1.048420039 | 1.005449929 | 1           | 0.999223375 | 0.85658787  |             |
|         | 1.00411471                                                                                                                                                                       | 1           | 1.370913069 | 1.10572673  | 3.972902341 | 1.199607037 | 1           |
|         | 0.641626961                                                                                                                                                                      | 3.046282608 | 0.658821502 | 0.52425366  | 1           | 1.267333836 |             |
|         | 1.126972925                                                                                                                                                                      | 1           | 1.034831945 | 0.832324913 | 1.012150873 | 1.093408773 |             |
|         | 0.803887056                                                                                                                                                                      | 1           | 0.801025773 | 0.855222059 | 0.953738262 | 0.773023714 |             |
|         | 0.880363762                                                                                                                                                                      | 1           | 0.827590541 | 0.780338769 | 0.812040343 | 0.663939254 |             |
|         | 0.732095331                                                                                                                                                                      | 0.846728415 |             |             |             |             |             |
| YBL111C | YBL111C::YBL111C::molecular_function unknown                                                                                                                                     |             |             |             |             | 1           | 0.872400702 |
|         | 0.744634002                                                                                                                                                                      | 1.050642663 | 0.385423282 | 1           | 1.228110035 | 1.322389502 |             |
|         | 0.637163454                                                                                                                                                                      | 0.495524349 | 1           | 0.927633201 | 0.898720405 | 0.215075837 |             |
|         | 0.829117261                                                                                                                                                                      | 1           | 0.662316333 | 0.508990305 | 0.638776016 | 0.45054082  | 1           |
|         | 0.566949283                                                                                                                                                                      | 0.42868998  | 0.327424674 | 0.775006301 | 1           | 0.697863094 |             |
|         | 0.716913632                                                                                                                                                                      | 1.154694659 | 1.076729136 | 0.989118145 | 1           | 0.959326965 |             |
|         | 0.383743314                                                                                                                                                                      | 0.990611497 | 1.003470805 | 0.492447152 | 1           | 0.557827516 |             |
|         | 0.447853339                                                                                                                                                                      | 0.694948662 | 0.472146157 | 0.48998263  | 0.67072796  |             |             |
| YDR156W | YDR156W::RPA14::14 kDa subunit of RNA polymerase I                                                                                                                               |             |             |             |             | 1           |             |
|         | 0.93810465                                                                                                                                                                       | 0.978182659 | 0.464839191 | 0.465572554 | 1           | 0.83333046  |             |
|         | 0.873268955                                                                                                                                                                      | 0.720144577 | 0.672425303 | 1           | 1.090178686 | 0.782765532 |             |
|         | 1.273098327                                                                                                                                                                      | 0.656407365 | 1           | 0.313249649 | 0.258194035 | 0.496759613 |             |
|         | 0.716238167                                                                                                                                                                      | 1           | 0.811426105 | 1.042221267 | 0.897469897 | 1           |             |
|         | 1.011909117                                                                                                                                                                      | 1.046308724 | 1.208757971 | 1.229124102 | 1.205916071 | 1           |             |
|         | 0.810960264                                                                                                                                                                      | 0.649454996 | 0.469105605 | 1.016492053 | 0.933871707 | 1           |             |
|         | 0.697756176                                                                                                                                                                      | 0.560790059 | 0.985555673 | 0.72055227  | 0.703785798 | 0.789812857 |             |
| YNL082W | "YNL082W::PMS1::Required for mismatch repair in mitosis and meiosis, low levels of postmeiotic segregation, and high spore viability, dispensable for homeologous recombination" |             |             |             |             |             |             |
|         | 0.948620943                                                                                                                                                                      | 0.872934907 | 0.816097794 | 0.822812569 | 0.942898758 |             |             |
|         | 0.675153923                                                                                                                                                                      | 0.648380495 |             | 0.948399654 | 0.218986284 |             |             |
|         |                                                                                                                                                                                  | 1.235632016 | 1           | 0.854504037 | 0.96653792  |             |             |
|         | 0.92404021                                                                                                                                                                       | 0.865616208 | 1.194377659 | 1           | 1.17488256  | 1.3257613   |             |
|         | 1.340568046                                                                                                                                                                      | 1.354845662 | 1.273586672 | 1           | 1.199863496 | 1.220953679 |             |
|         | 1.195556564                                                                                                                                                                      | 0.963586716 | 1.119006616 |             |             |             |             |
| YBL113C | YBL113C::YBL113C::molecular_function unknown                                                                                                                                     |             |             |             |             | 1           | 0.94068217  |
|         | 0.931180674                                                                                                                                                                      | 0.974311033 | 0.698801286 | 1           | 1.05818044  | 1.10500323  |             |
|         | 0.846661589                                                                                                                                                                      | 0.881161885 | 1           | 1.019769628 | 0.950515374 | 0.890707366 |             |
|         | 0.842714696                                                                                                                                                                      | 1           | 0.819121576 | 0.921761986 | 0.800506844 | 0.701553233 | 1           |
|         | 0.758388122                                                                                                                                                                      | 0.59372212  | 0.466402661 | 1.038665244 | 1           | 0.818620003 |             |
|         | 0.916366683                                                                                                                                                                      | 1.332581659 | 1.083364162 | 1.068213235 | 1           | 1.078770921 |             |

0.722969122 1.337997952 1.668453521 1.056023742 1 0.653225198  
 0.616487754 0.821683491 0.695996385 0.689986609 0.612061177  
 YDR158W YDR158W::HOM2::threonine and methionine pathway 1 1.44534603  
 1.079332447 1.433934188 1.111649084 1 1.370179014 1.335633736  
 1.074682201 0.865694689 1 1.613886744 1.413182286 0.707503526  
 1.231717362 1.397004759 2.354717682 2.230353089 1.036975457 1  
 0.220550277 0.268404516 0.606924891 1 1.224522445 0.990211336  
 1.39278521 1.306670895 0.930746869 1 0.899946818 0.878313385  
 1.737511976 1.946771966 1.100650039 1 0.917725978 1.443234342  
 2.067987831 1.22800494 1.190127128 0.959683866  
 YNL084C YNL084C::END3::Required for endocytosis and organization of the  
 cytoskeleton 1 0.949413867 1.200269512 1.153123992 1.211745488 1  
 1.229758963 1.12129347 1.070736759 1 0.903728888 1.182967477  
 1.633329788 1 0.937954796 1.016815796 1.26239226  
 0.955781084 1.119464838 0.746861033 1 0.870525762 1.231480948  
 0.730946085 0.580211134 0.949525598 1 1.064843044 1.688193899  
 1.564434482 1.023806057 1.787273378 1 1.339499651 1.652307488  
 1.064568668 1.13261427 1.473619563 1.408878988  
 YBR002C YBR002C::RER2::cis-prenyltransferase involved in dolichol synthesis  
 1 0.904200557 1.143652007 1.028148258 1.204327522 1 0.920766153  
 0.962865832 1.182297297 1.092638104 1 0.723927392 0.869681813  
 0.968159198 1.023084856 1 0.839159669 0.874521971 0.658520308  
 0.969630444 1 1.218389856 1.204141794 1.11520383 0.914327572 1  
 1.128838456 1.260897769 1.326310093 1.129126627 1.395432619 1  
 1.094109159 0.953386451 0.860759532 0.965148229 1.209515757 1  
 0.762955843 0.875968492 0.795435212 1.156000243 0.807047422 1.165455518  
 YDR160W "YDR160W::SSY1::Ssy1p controls expression of several transporter  
 genes, including BAP2, TAT1, PTR2 and YDR046c" 1 0.717231143 0.687936597  
 0.765716499 0.516431275 1 0.754968775 0.872194702 0.756131884  
 0.634647561 1 1.021126925 0.810459215 0.509098656 0.850289442 1  
 0.792528449 0.630962349 0.759380452 0.773643996 1 1.872928793  
 1.918382258 2.117058872 0.860510803 1.02992868 0.771889063  
 1.064571438 1.172168223 1 0.752563524 0.622896192 0.913892999  
 0.820021196 0.666579948 1 0.816658439 0.63663754 0.935331111  
 0.616735695 0.938161753 1.197853659  
 YBR004C YBR004C::YBR004C::not yet annotated 1 1.469491269 1.112879141  
 1.200783357 1.315931509 1 1.010713215 0.999142165 1.05650249  
 1.093588477 1 1.059100852 0.73783259 0.918418998 0.900713983 1  
 0.908954848 1.22281199 0.943980336 1 0.66301572  
 0.501451075 0.782929076 1 0.982857748 0.867910402 1.173717783  
 1.169595359 0.942945627 1 0.731478206 1.039575789 0.991335861  
 0.884132068 1.08508854 1 0.987557327 0.835368963 0.786306898  
 0.985179497 0.754964247 0.760917271  
 YDR174W YDR174W::HMO1::High mobility group (HMG)-like protein 1  
 1.05186667 1.189065861 1.008889675 1.120428327 1 0.995995965  
 1.053372384 1.36754017 1.108495439 1 0.998380722 1.134390643  
 1.378220071 0.886534289 1 1.102463228 1.110598656 1.045292082  
 0.892279576 1 1.25827542 1.763059356 1.944772353 1.167259368 1  
 0.922926491 1.051738191 0.699609666 0.782148495 1 0.90792064  
 1.15150351 1.045584978 0.664629934 0.691627415 1 0.921890674  
 1.14228855 1.289410875 0.964464088 1.135354884 1.757377341  
 YBR006W YBR006W::UGA2::involved in utilization of GABA as a nitrogen source  
 1 0.946654325 1.088741158 1.397894523 1.0886356 1 1.137253281  
 1.337693543 1.179611929 1.194206889 1 1.08410496 1.499131123  
 1.795562539 1.35264098 1 1.505207556 1.168375461 1.92838345  
 1.479343939 1 1.220286076 1.429074996 1.695166538 0.947905396 1  
 1.094109688 1.295323 1.124834859 1.09167234



|         |                                                                                                                                                                                                                |             |             |             |             |
|---------|----------------------------------------------------------------------------------------------------------------------------------------------------------------------------------------------------------------|-------------|-------------|-------------|-------------|
|         | 1.14942814                                                                                                                                                                                                     | 0.461913433 | 1           | 0.928871819 | 1.084277323 |
|         | 0.933260854                                                                                                                                                                                                    | 0.866867768 |             |             |             |
| YDR176W | YDR176W::NGG1::Involved in glucose repression of GAL4p-regulated transcription                                                                                                                                 |             |             |             |             |
|         | 1                                                                                                                                                                                                              | 1.395182838 | 1.241380454 | 2.056051729 | 1.140886667 |
|         | 1.407254746                                                                                                                                                                                                    | 1.177038185 | 2.071736936 | 1.388712299 | 1           |
|         | 1.387148186                                                                                                                                                                                                    | 1.343876035 | 1.73996296  | 2.830828405 | 2.043145546 |
|         | 1                                                                                                                                                                                                              |             | 0.517081474 | 1.043112525 | 1.004157455 |
|         | 0.898179813                                                                                                                                                                                                    | 1.205156895 | 1.177909381 | 1           | 0.788420226 |
|         | 0.755160488                                                                                                                                                                                                    | 0.95263939  | 0.566666903 | 1           | 0.666389596 |
|         | 0.78762449                                                                                                                                                                                                     | 0.59784742  | 0.84174145  | 1.227624805 |             |
| YBR018C | YBR018C::GAL7::galactose-1-phosphate uridyl transferase                                                                                                                                                        |             |             |             |             |
|         | 1                                                                                                                                                                                                              |             |             |             | 1           |
|         | 0.964756901                                                                                                                                                                                                    | 1.145081626 | 1.252113141 | 1.203822989 | 1           |
|         | 1.219010157                                                                                                                                                                                                    | 1.298446175 | 1.12620705  | 1           | 1.091839581 |
|         | 1.282636116                                                                                                                                                                                                    | 1.208193547 | 1           | 1.01357645  | 1.097636688 |
|         | 1.35942639                                                                                                                                                                                                     | 1           | 1.04621113  | 1.284767551 | 0.944417198 |
|         | 0.818284146                                                                                                                                                                                                    | 0.911196999 | 1.085090125 | 0.720379337 | 0.827694289 |
|         | 1.159182082                                                                                                                                                                                                    |             | 1.836742421 | 1           | 0.837479592 |
|         | 0.881079836                                                                                                                                                                                                    | 0.570616395 | 0.80995221  |             | 0.902163758 |
| YDR178W | "YDR178W::SDH4::Yeast succinate dehydrogenase (SDH) is a tetramer of non-equivalent subunits--Sdh1p, Sdh2p, Sdh3p, Sdh4p--that couples the oxidation of succinate to the transfer of electrons to ubiquinone." |             |             |             |             |
|         | 1                                                                                                                                                                                                              |             |             |             | 2.272999305 |
|         | 2.263822353                                                                                                                                                                                                    | 1.605439857 | 2.163954015 | 1           | 1.788565642 |
|         | 2.110580066                                                                                                                                                                                                    | 2.195361654 | 1           | 1.849437821 | 1.345574289 |
|         | 1.60857916                                                                                                                                                                                                     | 1           | 2.466960502 | 0.898150885 | 2.158744857 |
|         | 1.151862537                                                                                                                                                                                                    | 0.570636206 | 1.48382323  | 1           | 0.633334535 |
|         | 0.251843331                                                                                                                                                                                                    | 1.122549439 | 0.74515389  | 1           | 0.276637774 |
|         | 0.148106814                                                                                                                                                                                                    | 0.234768978 | 1.193060027 | 1           | 0.429721786 |
|         | 0.383468628                                                                                                                                                                                                    | 1.248686511 | 2.104824981 | 1.311684775 |             |
| YBR020W | YBR020W::GAL1::Haploid specific protein localized in the Golgi and plasma membrane                                                                                                                             |             |             |             |             |
|         | 1                                                                                                                                                                                                              | 1.15371589  | 1.078460676 | 0.964959971 | 0.861492715 |
|         | 1.070283556                                                                                                                                                                                                    | 1.095086831 | 1.067933872 | 1.039542797 | 1.275558618 |
|         | 1.065120987                                                                                                                                                                                                    | 1.191937298 | 1.000526714 | 1           | 1.212363897 |
|         | 1.198575322                                                                                                                                                                                                    | 1.019936897 | 1           | 1.323513205 | 1.642879827 |
|         | 0.363386412                                                                                                                                                                                                    | 1           | 1.124492682 | 1.202237002 | 2.082983811 |
|         | 0.877045159                                                                                                                                                                                                    | 1.019867787 | 0.620187125 | 1.290421432 | 1.180303715 |
|         | 0.739975276                                                                                                                                                                                                    | 0.930454568 | 0.892439491 | 1.038582214 | 0.963127378 |
| YBR022W | YBR022W::YBR022W::molecular_function unknown                                                                                                                                                                   |             |             |             |             |
|         | 1                                                                                                                                                                                                              |             |             |             | 1.068461982 |
|         | 1.111095158                                                                                                                                                                                                    | 1.071674688 | 1.24954447  | 1           | 1.018658336 |
|         | 1.237974581                                                                                                                                                                                                    | 1.203174961 | 1           | 0.914732752 | 1.126666659 |
|         | 1.131580002                                                                                                                                                                                                    | 1           | 1.711995243 | 1.505723604 | 2.109974181 |
|         | 1.881898507                                                                                                                                                                                                    | 1.818902715 | 2.41372884  | 1.38451401  | 1           |
|         | 0.670081619                                                                                                                                                                                                    | 0.476636324 | 0.726841678 | 0.991210216 | 1           |
|         | 0.863400105                                                                                                                                                                                                    | 0.613459226 | 0.818945718 | 1.9480278   | 1           |
|         | 0.642719396                                                                                                                                                                                                    | 0.936122681 | 1.502184888 | 1.623053131 | 0.931663945 |
| YBR024W | YBR024W::SCO2::Originally identified as a multicopy suppressor of a respiratory defective mutant; homolog of Scolp                                                                                             |             |             |             |             |
|         | 1                                                                                                                                                                                                              |             |             |             | 0.937230952 |
|         | 1.111287045                                                                                                                                                                                                    | 1.404315199 | 1           | 0.957546007 | 1.059017318 |
|         | 1.449187005                                                                                                                                                                                                    | 1           | 0.962468832 | 1.157268034 | 1.93807358  |
|         | 2.141197076                                                                                                                                                                                                    | 1.453130494 |             | 2.145346901 | 1           |
|         | 2.025120575                                                                                                                                                                                                    | 1.447457537 |             | 0.906161268 | 1.005077899 |
|         | 0.96470723                                                                                                                                                                                                     | 1.045861148 |             | 1.2450176   | 0.980684594 |
|         | 1.235171865                                                                                                                                                                                                    | 1           | 1.058823883 | 1.283539198 | 1.203569165 |
|         | 1.100659341                                                                                                                                                                                                    |             |             |             | 1.560246298 |
| YNL086W | YNL086W::YNL086W::molecular_function unknown                                                                                                                                                                   |             |             |             |             |
|         |                                                                                                                                                                                                                |             |             |             | 1.164797477 |
|         | 1.0124092                                                                                                                                                                                                      | 1.033166932 | 1.140498848 | 0.849931083 | 0.769965755 |
|         | 1.098408415                                                                                                                                                                                                    |             | 1.150172923 | 0.957233855 | 1.894245546 |
|         | 0.719860963                                                                                                                                                                                                    | 0.71854258  | 0.817697032 | 0.8166973   | 1           |
|         |                                                                                                                                                                                                                |             |             |             | 0.189151693 |

1.19477053 1 0.950528614 0.886543889 0.802250735 0.837095004  
0.988012478 1 0.962594975 1.085366581 1.050739445 0.764604049  
1.158725344 1 0.910525969 0.918900343 0.998762265 0.989780584  
1.317814116  
YNL088W "YNL088W::TOP2::dispensable for premeiotic DNA synthesis and  
recombination, but required for meiosis I" 1 1.147861313 0.79995721  
0.685707299 1 1.09710637 1.030574567 0.816379539 0.869104498 1  
0.900123528 1.069903049 1.130752472 1 0.640869855 1.39862099  
1.135824964 0.555468491 1 0.587134843 0.355651364 0.262393373  
0.26426306 1 1.040357879 0.925469964 1.303911776 1.142019424  
0.988574264 1 0.943789131 1.1349324 1.107072932 1.013869813  
0.932359375 1 0.788075507 0.890165229 0.85427914 0.633911244  
0.879188386 1.021853256  
YNL088W "YNL088W::TOP2::dispensable for premeiotic DNA synthesis and  
recombination, but required for meiosis I"  
0.691292715 0.803143007 0.724700724 1.072426161  
0.54741275  
YNL102W "YNL102W::POL1::Required for mitotic DNA synthesis, premeiotic DNA  
synthesis, recombination, and full sporulation" 1 1.133663357  
1 1.254382646 1.111764992 0.959979036 1 1.290835667  
1.342043134 0.806203783 0.677750011 0.816892609  
0.935834012 0.815475265 0.740740019  
1.144418893 1 1.267280601 0.955414601 1.21408511 1.096103371  
0.884410717 1 0.932076139 1.036460641 1.043348386 0.860982812  
0.865602321 1.152321171  
YNL102W "YNL102W::POL1::Required for mitotic DNA synthesis, premeiotic DNA  
synthesis, recombination, and full sporulation"  
1 1.070718495 0.851209302  
1.093703877 0.801815729 1 1.242038633 1.40966547 1.470708047  
1.054357754 1.533515135 1 1.13431729 1.46904018 0.676243187  
0.981202034 0.599717324  
YNL104C YNL104C::LEU4::leucine biosynthesis 1 1.031715986 0.71928763  
0.901825623 0.432697186 1 0.902935846 0.930619587 0.548476668  
0.539367984 1 1.518951126 1.224547712 0.474366436 0.607226445 1  
1.274452289 1.22969651 0.91310752 0.412118454 1 0.772459513  
0.329383926 0.257432016 0.37832432 1 0.95530677 0.703209089  
1.107709019 1.263515809 0.715368718 1 0.79265167 0.365305415  
0.419095099 0.340149535 1 0.88473845 0.477800999 0.706586714  
0.528329282 0.710215813 0.559523735  
YDR180W YDR180W::SCC2::Sister chromatid cohesion protein 1  
1.711368336 1.628119432 1.189948227 1.431024744 1 1.399550895  
1.422219973 1.371637332 1 1.303330371 1.694927331 2.551536411  
1.119695028 1 1.04993553 1.211924807 0.825429689 1  
1.083840706 1.863266284 1 1.16027027 1.112284614  
1.054071385 1.005335691 1.083959138 1 0.953554283 1.287419552  
1.081264077 0.8719228 0.900831896 1 1.079529813 1.514936004  
0.97395866 1.430404845 0.993330466 1.227624805  
YNL106C YNL106C::INP52::Synaptojanin-like protein 1 0.998391858  
0.92957746 1.197166973 0.79697863 1 1.031528497 1.084446564  
0.980522834 1 1.162926772 1.14849825 1.101872409 1.059833696 1  
0.833568589 1.120505952 1.068041791 0.830203313 1 0.834748356  
0.612900091 0.596126361 0.701722098 1 0.980890789 0.995668399  
1.055687597 1.199811695 1.030220738 1 0.810754569 0.669717603

|         |                                                                                                                      |             |             |             |             |             |
|---------|----------------------------------------------------------------------------------------------------------------------|-------------|-------------|-------------|-------------|-------------|
|         | 0.602973443                                                                                                          | 0.686821072 | 0.520360073 | 1           | 0.929271206 | 0.837540655 |
|         | 1.05170699                                                                                                           | 0.682859719 | 1.052593349 | 0.611185564 |             |             |
| YNL106C | YNL106C::INP52::Synaptojanin-like protein                                                                            |             |             |             |             |             |
|         |                                                                                                                      |             |             |             | 0.777198734 |             |
|         | 0.551676801                                                                                                          |             |             |             |             |             |
|         | 0.316459394                                                                                                          |             |             |             |             |             |
| YDR182W | "YDR182W::CDC1::Protein that affects bud emergence, intrachromosomal recombination, and nuclear division"            |             |             |             |             |             |
|         |                                                                                                                      |             | 1           | 0.940851374 | 0.948915635 |             |
|         | 1.196992855                                                                                                          | 0.845900134 | 1           | 1.086872001 | 1.119403235 | 0.909714435 |
|         | 0.894681239                                                                                                          | 1           | 1.032743608 | 1.017689076 | 0.960603869 | 1.024245942 |
|         | 1.216826617                                                                                                          | 0.765167043 | 1.028272995 | 1.000922928 | 1           | 1.079319138 |
|         | 0.753779526                                                                                                          | 0.860480959 | 0.635115389 | 1           | 0.965518042 | 0.891311473 |
|         | 0.845913694                                                                                                          | 1.095240328 | 1.032583423 | 1           | 1.016732873 | 0.709512787 |
|         | 0.793851822                                                                                                          | 0.731211395 | 0.693340228 | 1           | 1.183537575 | 0.796334966 |
|         | 1.096536455                                                                                                          | 1.085891962 | 1.116352166 | 0.989455116 |             |             |
| YNL108C | YNL108C::YNL108C::molecular_function unknown                                                                         |             |             |             |             |             |
|         |                                                                                                                      |             |             |             | 1.065063267 |             |
|         | 1.004437509                                                                                                          | 0.771520737 | 1.034770273 | 0.869302698 | 0.865525002 |             |
|         | 0.956635564                                                                                                          | 0.89829388  | 0.802950922 | 0.966404108 | 0.782212235 | 1           |
|         | 1.040915795                                                                                                          | 0.825642029 | 0.94790009  | 1           | 1.454286511 | 1.050430187 |
|         | 1.136099115                                                                                                          | 0.956730888 | 1           | 0.980115447 | 1.04117201  | 1.02347553  |
|         | 0.940093468                                                                                                          | 0.863291997 | 1           | 0.976227045 | 1.20448502  | 1.002810871 |
|         | 0.990047238                                                                                                          | 0.814536239 | 1           | 0.846290122 | 0.924886274 | 0.843937366 |
|         | 0.673611988                                                                                                          | 0.622905749 | 1.060380634 |             |             |             |
| YDR184C | "YDR184C::ATC1::interacts with AIP3, localized to the nucleus"                                                       |             |             |             |             |             |
|         |                                                                                                                      |             |             |             |             | 1           |
|         | 0.852638709                                                                                                          | 0.760823166 | 1.017699744 | 1.274074411 | 1           | 0.810000934 |
|         | 0.801830194                                                                                                          | 0.979681568 | 1.241655337 | 1           | 0.425355449 | 0.392027015 |
|         | 0.434208013                                                                                                          | 0.995764168 | 1           |             | 1           | 0.287187442 |
|         | 1.390182041                                                                                                          |             |             | 1.031221422 |             | 0.862489653 |
| YNL110C | YNL110C::NOP15::Nucleolar protein 15                                                                                 |             |             |             |             |             |
|         |                                                                                                                      |             |             |             | 1           | 0.508048169 |
|         | 0.547449393                                                                                                          | 0.584544278 | 0.816372757 | 1           | 0.50684043  | 0.45980964  |
|         | 0.680287985                                                                                                          | 0.85455079  | 1           | 0.395233181 | 0.330500769 | 0.721612448 |
|         | 0.399206323                                                                                                          | 0.190077444 | 0.310254996 | 0.464861577 | 1           | 0.751975514 |
|         | 0.264074096                                                                                                          | 0.335135314 | 1.148501068 | 1           | 0.670527449 | 0.560186536 |
|         | 0.476344822                                                                                                          | 0.510826168 | 0.877046331 | 1           | 0.728405023 | 0.835730002 |
|         | 0.542226698                                                                                                          | 1.096732051 | 2.243107068 | 1           | 0.51633098  | 0.759006806 |
|         | 1.087660611                                                                                                          | 0.996243547 | 0.715163136 | 1.217117347 |             |             |
| YBR026C | YBR026C::MRF1'::May be transcriptional regulator of genes involved in assembly of mitochondrial respiratory proteins |             |             |             |             |             |
|         |                                                                                                                      |             |             |             | 1           | 0.820287746 |
|         | 1.028494097                                                                                                          | 1.234635353 | 1.19905559  | 1           | 1.0552793   | 1.178194597 |
|         | 1.187981663                                                                                                          | 1.171510396 | 1           | 0.790093593 | 1.186303007 | 1.581135434 |
|         | 1.239510458                                                                                                          | 1           | 1.771836883 | 2.135360231 | 3.027162323 | 3.31996299  |
|         | 1.45507879                                                                                                           | 1.641475489 | 2.776202483 | 2.582135947 | 1           | 1.104061687 |
|         | 1.359620515                                                                                                          | 1.74140548  | 0.942659855 | 1.111516306 | 1           | 1.067645228 |
|         | 1.304056322                                                                                                          | 1.107932857 | 1.137608867 | 0.791245045 | 1           | 1.4496033   |
|         | 1.369759496                                                                                                          | 1.542657395 | 1.100285365 | 1.677857249 | 1.61377508  |             |
| YDR198C | YDR198C::YDR198C::molecular_function unknown                                                                         |             |             |             |             |             |
|         |                                                                                                                      |             |             |             | 1           | 0.893998207 |
|         | 0.958552476                                                                                                          | 1.047138307 | 0.974331668 | 1           | 0.924975488 | 0.907859162 |
|         | 1.143899751                                                                                                          | 1           | 0.694811393 | 0.786020974 | 0.807475506 | 1.004974045 |
|         | 0.41740276                                                                                                           | 0.845059309 | 0.982789992 | 1           | 0.910718433 | 1.228262841 |
|         | 0.901723746                                                                                                          | 0.887432471 | 1           | 1.03630409  | 0.993229568 | 0.910650785 |
|         | 0.846100317                                                                                                          | 1.041732536 | 1           | 0.771362257 | 0.906700623 | 0.696378616 |
|         | 0.760164062                                                                                                          | 0.673616682 | 1           | 0.770552762 | 0.741722099 | 0.799297049 |
|         | 0.757621609                                                                                                          | 0.951803299 |             |             |             |             |
| YNL112W | YNL112W::DBP2::ATP-dependent RNA helicase of DEAD box family                                                         |             |             |             |             |             |
|         |                                                                                                                      |             |             |             |             | 1           |
|         | 0.991378184                                                                                                          | 0.422589614 | 0.809408522 | 0.580373757 | 1           | 0.776503787 |

|             |                                                                                        |             |             |             |             |             |   |
|-------------|----------------------------------------------------------------------------------------|-------------|-------------|-------------|-------------|-------------|---|
| 0.671977014 | 0.917207251                                                                            | 1           | 0.496754392 | 0.191249625 | 0.563201605 |             |   |
| 0.790089261 | 1                                                                                      | 0.154045073 | 0.13418036  | 0.042274302 | 0.08352776  | 1           |   |
| 0.409874949 | 0.121260192                                                                            | 0.069655635 | 0.250940248 | 1           | 0.70418194  |             |   |
| 0.264858877 | 0.472615211                                                                            | 1.069946613 | 0.730008105 | 1           | 0.580188452 |             |   |
| 0.350375187 | 0.253979933                                                                            | 0.417741685 | 0.883675883 | 1           | 0.627453616 |             |   |
| 0.334567585 | 0.559369743                                                                            | 0.913581952 | 0.2741299   | 0.586668095 |             |             |   |
| YBR028C     | YBR028C::YBR028C::molecular_function                                                   | unknown     | 1           | 1.144780726 |             |             |   |
| 1.359457518 | 1.212853411                                                                            | 1.347305608 | 1           | 1.17291629  | 1.137202862 |             |   |
| 1.409830964 | 1.114998968                                                                            | 1           | 1.066957583 | 1.046537365 | 0.961723882 |             |   |
| 1.23383807  | 1                                                                                      | 0.805088307 | 0.923645299 | 0.765246853 | 0.984099503 | 1           |   |
| 1.153619404 | 0.903809959                                                                            | 1.271337974 | 1.395966472 | 1           | 0.910159904 |             |   |
| 1.053611931 | 1.118075638                                                                            | 1.178297416 | 1.033198093 | 1           | 0.707894466 |             |   |
| 0.694216545 | 0.932267253                                                                            |             | 0.919659453 | 1           | 0.626406405 | 0.625792491 |   |
| 0.730708482 | 0.661965271                                                                            | 0.65629036  | 0.980698884 |             |             |             |   |
| YDR200C     | YDR200C::VPS64                                                                         | 1           | 0.86936472  | 1.009938723 | 1.24010218  |             |   |
| 1.18151558  | 1                                                                                      | 1.080147825 | 1.178471826 | 0.969331734 | 1.010532883 | 1           |   |
| 0.971759146 | 1.081979961                                                                            | 0.818866873 | 1.192990802 | 1           | 1.138824847 |             |   |
| 0.907247141 | 1.122469088                                                                            | 1           | 0.998038018 | 0.92407707  |             |             |   |
| 1.050177571 |                                                                                        | 0.674810261 | 1.059257298 |             | 1.085710217 | 0.976054835 |   |
| 0.896312886 |                                                                                        | 1.205823771 | 1           | 0.804497158 | 1.153654234 | 0.77804478  |   |
| 1.35690717  |                                                                                        | 0.783683463 |             |             |             |             |   |
| YNL126W     | YNL126W::SPC98::Involved in microtubule organization by the SBP                        | 1           |             |             |             |             |   |
| 0.717678389 | 0.534339833                                                                            | 0.839269648 | 0.684596461 | 1           | 0.821492937 |             |   |
| 0.850317549 | 0.617096606                                                                            | 0.593380166 | 1           | 0.645905272 | 0.52487645  |             |   |
| 1.057787668 |                                                                                        | 1.410034727 | 0.611439231 | 0.843510282 | 0.874690133 | 1           |   |
| 0.753740393 | 0.648133984                                                                            | 0.635749538 | 0.704949871 | 1           | 0.848703205 |             |   |
| 0.721157809 | 0.919961218                                                                            | 0.972738764 | 1.030107564 | 1           | 0.663661973 |             |   |
| 0.532271661 | 0.600340074                                                                            | 0.787178228 | 0.545006694 | 1           | 0.778269396 |             |   |
| 0.779286718 | 1.036825658                                                                            | 0.485731937 | 0.941176469 | 0.723265402 |             |             |   |
| YBR042C     | YBR042C::YBR042C::molecular_function                                                   | unknown     | 1           | 1.500997283 |             |             |   |
| 1.344381722 | 1.260922438                                                                            | 1.46870445  | 1           | 1.396434975 | 1.390720301 |             |   |
| 1.339076346 | 1.39016301                                                                             | 1           | 1.221900542 | 1.3935865   | 1.221032092 |             |   |
| 1.219985935 | 1                                                                                      | 1.029345129 | 0.891202224 | 0.628303351 | 0.892379707 | 1           |   |
| 1.030553523 | 0.556312006                                                                            | 0.387169329 | 0.690013371 | 1           | 0.988167413 |             |   |
| 1.07038324  | 0.996096201                                                                            | 1.034817905 | 0.998888935 | 1           | 0.889749931 |             |   |
| 1.1026322   | 0.795710594                                                                            | 0.75942558  | 0.911174613 | 1           | 1.090765274 |             |   |
| 1.04828585  | 1.088524427                                                                            | 1.308809918 | 0.865760456 | 1.519207653 |             |             |   |
| YDR202C     | YDR202C::RAV2::Regulator of (H <sup>+</sup> )-ATPase in Vacuolar membrane              |             |             |             |             |             | 1 |
| 0.881796873 | 1.310969585                                                                            | 1.045827862 | 1.563652444 | 1           | 1.049332958 |             |   |
| 1.041931566 |                                                                                        | 1.263121192 | 1           | 1.036909278 | 1.310100235 | 1.58450755  |   |
| 1.060878044 | 1                                                                                      | 1.674826564 | 1.30910218  | 1.648905529 | 2.142710079 | 1           |   |
| 1.726556184 | 2.416287657                                                                            | 2.978594771 | 1.389822603 | 1           | 1.442629618 |             |   |
| 1.779390936 | 1.294455585                                                                            | 0.987120231 | 1.490044786 | 1           | 1.330098866 |             |   |
| 1.73129462  | 2.552184447                                                                            | 1.591645621 | 2.70361723  | 1           | 1.422059146 |             |   |
| 1.361630301 | 0.675449635                                                                            | 1.472741456 | 0.793650016 | 1.190848653 |             |             |   |
| YNL128W     | "YNL128W::TEP1::Similar to human tumor suppressor gene known as TEP1, MMAC1 and PTEN1" | 1           | 1.109631995 | 1.220128158 | 1.222965093 | 1           |   |
| 0.899980249 |                                                                                        | 1           | 1.023373116 |             | 0.786643649 | 1.031797781 | 1 |
| 0.440534123 | 0.849867703                                                                            | 0.858854454 | 1.110163945 | 1           | 1.771928141 |             |   |
| 3.724808355 | 2.645277931                                                                            | 1.448505393 | 1           | 0.663119884 |             |             |   |
| 0.690269435 | 0.899430573                                                                            | 1           | 0.982366603 | 0.91601     | 1.030254922 |             |   |
| 1.41094019  | 1                                                                                      |             | 0.315768604 |             | 1.238132366 |             |   |
| YBR044C     | YBR044C::TCM62::mitochondrial protein; (putative) chaperone                            | 1           |             |             |             |             |   |
| 0.940904768 | 0.993897204                                                                            | 1.081229941 | 1.031886392 | 1           | 1.060376912 |             |   |
| 1.011487793 | 1.068148433                                                                            | 0.926511563 | 1           | 1.058383687 | 1.041215048 |             |   |
| 0.933674258 | 1.004831115                                                                            | 1           | 0.971471937 | 0.829427154 | 0.718655978 |             |   |
| 0.843921022 | 1                                                                                      | 0.99208023  | 0.929738696 | 0.839024426 | 0.863319423 | 1           |   |

0.96726605 1.179072006 1.151190151 1.243088511 1.098558769 1  
 0.985759919 0.658391074 0.865341725 0.85184443 0.696748572 1  
 0.782039162 0.557057125 0.683866504 0.542207951 0.85673106 0.637454259  
 YDR204W YDR204W::COQ4::Involved in ubiquinone biosynthesis. 1  
 1.112471123 1.26973736 1.194848876 1.054980675 1 1.191100758  
 1.192359703 1.189517288 1 1.235166865 1.568031679 2.26753072  
 1.092641319 1 3.348829333 3.132428667 3.770765891 2.481801591 1  
 1.815893452 2.134078001 2.948511374 1.757264485 1 1.180380113  
 1.356272279 1.658728805 1.187441742 1.181219967 1 1.01309825  
 1.405959214 2.004719313 1.189776843 0.829177334 1 1.044691629  
 1.040309113 1.064091435 0.849489023 0.988836654 1.010470134  
 YBR046C "YBR046C::ZTA1::Zeta-crystallin homolog, has similarity to E. coli  
 quinone oxidoreductase and human zeta-crystallin which has quinone  
 oxidoreductase activity" 1 1.104887352 1.111243487 1.130940715  
 1.165865388 1 1.110901758 1.091368606 1.160616026 1.167791626 1  
 1.060371999 1.149019575 1.404158641 1.130982376 1 1.615893333  
 1.498196318 1.329132371 1.47906451 1 1.337499702 0.924167472  
 0.986945767 0.934244201 1 1.007978375 1.140142922 1.252797562  
 1.19861327 0.800957269 1 1.435490262 1.784494386 2.08772118  
 1.51948275 1 0.657728655 0.96092242  
 YDR206W YDR206W::EBS1::EST1-like bcy1 Suppressor 1 1.069281715  
 1.010074164 1.415725811 1.085903543 1 1.246674054 1.212376157  
 0.986062797 1.054401447 1 0.902497522 0.866686117 0.68248416  
 1.098726386 0.625101354 1 0.441967361  
 1 0.783756089 0.764944295 0.884555886 0.902690462 1.025740404 1  
 0.840825069 0.44160865 0.855623601 0.746394125 0.505842798 1  
 0.747055227 0.510904995 0.907314987 0.838196763 0.700658465 0.833594067  
 YBR048W "YBR048W::RPS11B::Homology to rat S11, human S11, and E. coli S17"  
 1 1.256503334 1.222913005 0.792450695 1.08242216 1 1.056429037  
 1.13013137 0.894380737 0.903640544 1 1.000060599 0.86845417  
 0.848970931 0.749737037 1 0.969319751 0.31413065 0.230261902  
 0.517275418 1 0.947157931 0.73765536 0.444477236 0.72092402 1  
 1.335034527 0.836334861 0.914049105 1.305515684 1.174863507 1  
 1.142190411 1.113198066 0.638498526 1.634002242 1 0.910927832  
 1.071738498 0.697508238 1.60269356 0.608966641 1.12430125  
 YDR208W YDR208W::MSS4::Involved in actin cytoskeleton organization;  
 multicopy suppressor of stt4 mutation 1 1.87535061 1.774241428  
 2.062302342 1 1.668075662 1.776819663 1.72192921 1  
 1.415621819 1.55915854 1.503787433 1.95380005 0.445354106  
 0.638012252 0.731659075 0.765980018 1  
 1.094487241 0.945985489 0.948158084 1.021728518 1 0.855939313  
 0.790182206 1.096616467 0.79314645 0.810091729 1 0.848897438  
 0.942161678 0.843814558 1.0296394 0.888870092 0.853733421  
 YBR050C YBR050C::REG2::Possible regulatory subunit for the PP1 family  
 protein phosphatase Glc7p 1 1.218451923 1.38457583 1.233673161  
 1.250856405 1 1.340411149 1.345130814 1.341310066 1.486051903 1  
 1.231165571 1.092511128 1 1.212023416 1.190099413  
 1.336729423 1 1.025722796 1.390229056 1.452366681  
 0.984908215 1.006918677 1.056801 1.001550308 0.978880058 1  
 0.914149174 1.037195218 1.116216468 0.861021256 1.321092169 1  
 0.828971673 0.820560928 0.950730386 1.071138316 1.016599476  
 YDR222W YDR222W::YDR222W::molecular\_function unknown 1 0.722440921  
 0.705882325 0.856357535 0.880021597 1 0.697805163 0.64731232  
 0.836752039 1 0.435857545 0.455153226 0.516505529 0.80633233 1  
 1.245905085 1.215210008 1.079551576 1.189904873 1 0.856230178  
 1.045588394 0.739013473 0.729985936 1 0.969099563 0.708402383  
 0.744019114 0.825654683 0.807093572 1 0.658484761 0.503011671

0.700424122 0.72114032 0.556687289 1 0.859875381 0.684099853  
 0.712493284 0.861608245 0.79947212 0.833594067  
 YBR052C YBR052C::YBR052C::molecular\_function unknown 1 1.043179463  
 1.422516445 1.34464392 1.388424319 1 1.097151284 1.334511294  
 1.942890017 1.843767315 1 1.118724198 1.634691891 2.765223072  
 1.426430111 1 2.021316225 2.039152878 2.553301869 2.671552602 1  
 2.615751037 2.926412411 3.829294387 2.235181488 1 1.247785373  
 1.925942571 0.967496802 1.348765978 1.443266361 1.74399822  
 1.467191828 1.009613987 0.734978272 1 1.38363985 1.489231008  
 1.37142587 1.009041437 1.696799598 1.302052878  
 YBR066C YBR066C::NRG2::homologue of NRG1 1 1.788031944  
 1.197065879 1.747307002 1 1.185869024 1.231306819 1.877678021  
 1.395019073 1 0.80425222 1.578092541 1.663623123 1.653365264 1  
 1.45008413 1.050890385 0.923535007 3.079137764 1 1.423408797  
 0.870794612 0.941263957 1.534934708 1 1.377535927 1.359422189  
 1.42536498 1.264659224 1.189746302 1 1.445930569 2.51058026  
 3.948720076 2.947320484 2.754039081 1 1.292346312 1.579668582  
 1.593562786 1.156870681 1.505266181 0.958808305  
 YBR068C YBR068C::BAP2::contains 12 predicted transmembrane domains 1  
 1.17513836 0.845546024 0.94531605 0.509833279 1 0.952619097  
 0.934384912 0.69401381 0.585675512 1 2.114665274 1.191508373  
 0.582227563 0.649627675 1 0.744946955 0.64670579 0.501188025  
 0.466332361 1 1.071442324 0.751097853 0.806281742 0.584399014 1  
 1.590077023 1.602345173 2.679591016 1.076116359 1 1.140152183  
 0.813152995 1.303611287 1.005269286 0.354507968 1 1.109896655  
 0.645380484 0.899648975 0.588485374 0.620210892 0.605931783  
 YAR066W YAR066W::YAR066W::molecular\_function unknown 1 1.148156323  
 1.060678133 1.120115426 0.922562163 1 1.061086486 1.030263494  
 0.97618025 0.878791813 1 1.215709977 1.252653849 1.141069503  
 0.999014189 1 1.562566989 1.314658207 1.306730504 0.981976471 1  
 1.209406116 0.899750565 1.153517973 1.248447862 1 0.978831505  
 0.753278733 0.962719406 0.920630676 0.743172 1 0.788016285  
 0.468658755 0.490052018 0.336570565 0.095630613 1 0.843986146  
 0.517817842 0.560967533 0.265486598 0.593979858 0.585792482  
 YER044CA YER044CA::MEI4::Functions in early recombination  
 1.051519064 1.36088757 1.068055141 1.046069019 1.159891386  
 1.116958133 1.115209614 1.151853799 0.997955332 1.104299613 1  
 0.686038458 0.400726716 0.591762855 1 1.347080711 2.37924502  
 1.708325384 0.604913108 1 0.907859505 0.966461784 0.879786069  
 0.974884576 1.0027281 1 0.853628241 0.909032803 0.847752123  
 1 0.955652258 0.928124613 1.071076156 1.197487096 1.076280196  
 0.794190973  
 YMR286W YMR286W::MRPL33::essential for mitochondrial function 1  
 1.015706594 1.543227866 0.991835814 2.015378746 1 1.016238353  
 1.185350757 1.686390346 1.684391034 1 0.980609427 1.185779952  
 1.721972829 1.079133665 0.757602834 0.377689834 0.429286482  
 0.910447939 1 1.513090595 2.245721115 2.485314379 1.474680404 1  
 0.816558358 0.900662785 0.468707859 0.566503766 0.832168777 1  
 1.28664814 1.799904323 1.291821336 1.520050683 2.785011933 1  
 1.23845302 1.576834603 1.103066756 1.670233614 1.664922967 1.448282134  
 YMR316CB YMR316CB::YMR316C-B::molecular\_function unknown 1 1.536017103  
 1.527552879 1.475018224 1.76922995 1 1.363671976 1.490184087  
 1.83831215 1.761346497 1 1.757081879 1.653424387 1.587397502  
 1.461858178 0.846020825 0.546235447 0.558395207 0.446972159 1  
 1.011625728 1.254638768 0.637631775 0.653892746 1.339840442  
 1.342865051 1.179050498 1.095597145 1 1.164557412 1.377723138

1 1.134191015 0.936023495 1.69936776  
 1.200480549  
 YNL130C YNL130C::CPT1::Phospholipid biosynthesis 1 1.299029337  
 0.933193126 0.976166492 0.936058199 1 0.999948604 0.897014059  
 0.867858915 0.847043514 1 1.109347675 0.843283969 1.480076944  
 1.160374141 1 0.898252912 0.322020911 0.761814696 0.843656952 1  
 0.819872975 0.755335794 0.691764322 1.084219461 1 1.157731646  
 1.214219699 1.05324541 1.118615347 0.939369165 1 1.193087625  
 1.258260912 1.365215945 0.84816507 0.749595963 1 1.061692657  
 1.216569614 1.00136481 0.847321852 1.079166845 0.782807851  
 YNL132W YNL132W::KRE33::Killer toxin REsistant 1 0.900088516  
 0.549599793 0.8242902 0.73923299 1 0.819222573 0.68958582  
 0.657455022 0.578819826 1 0.709984495 0.373204413 0.999379673  
 0.736223348 1 0.414186715 0.272065768 1 0.238365867  
 0.173176754 1 0.779999976 0.511350133  
 0.721279786 1 0.771671927 0.512274629 0.583126551 0.894788192  
 0.599490238 1 0.472377056 0.79069012 0.644674005 0.432634767  
 0.46495636  
 YNL134C YNL134C::YNL134C::molecular\_function unknown 1 0.837473196  
 0.873242514 0.984626412 0.515215848 1 0.892374795 1.15470175  
 0.966305149 1 4.365144745 5.696529424 1.243594943 1.678599876 1  
 3.207371361 2.661534863 4.4535051 3.460453086 1 5.323728331  
 6.091209713 8.341113997 4.409426035 1 3.097311313 7.547722014  
 11.49727554 1.941256131 1.268510119 1 3.984560645 9.062146406  
 9.732504442 4.745613004 1.607682682 1 4.739966715 6.59209988  
 6.941721483 0.789098566 1.121157088 4.094417928  
 YNL136W YNL136W::YNL136W::molecular\_function unknown 1  
 0.959432015 0.862292153 1 0.942117269 0.879869387 1  
 0.956296892 0.926827477 0.863203396 1 0.948269109  
 0.802229659 1.116775226 1 1.342389924 1.647835088 1.200325564  
 0.963931772 1 0.753334813 0.899519818 0.759984911 0.79193433  
 0.951521948 1 1.052163224 1.055694779 1.093860886 1.176451184 1  
 1.109341119 1.066464385 1.07960072 0.862140419 1.183307618 1.220619903  
 YNL150W YNL150W::YNL150W::molecular\_function unknown 1 1.138555153  
 1.283128505 0.745765531 1.591143097 1 0.70873126 0.692753827  
 1.487732969 1.375174509 1 0.938395295 1.11777968 1.646564472  
 1.144885714 1 0.817012198 0.495939754 0.542564769 1.006067761 1  
 2.126335481 2.396944001 1.973486082 1.456132852 1 0.959954914  
 1.38058165 0.909654246 0.793994881 0.904912754 1 1.072501289  
 1.738579551 1.388492196 0.963156219 1.578644087 1 1.047127364  
 1.724238316 1.101872416 1.05819725 0.88345592 1.192599878  
 YNL152W YNL152W::YNL152W::molecular\_function unknown 1 0.967154619  
 0.930817884 0.830001681 0.9601975 1 0.853913646 0.82097716  
 0.907249664 0.887884497 1 0.892463655 0.989587379 0.97632142 1  
 1.09727875 2.51991004 0.961210383 1 1.154020179 1.249550978  
 0.797015457 1 0.875910608 0.722692156 0.688448373 0.852548453  
 0.78981914 1 0.822540276 0.906385856 0.827097987 1.016545047  
 1.216499613 1 0.927157317 0.912995545 1.101029596 1.090090114  
 1.09167445 1.098908116  
 YNL154C YNL154C::YCK2::membrane-bound casein kinase I homolog 1  
 1.302306261 1.08940677 1.110367072 0.971007788 1 1.19945924  
 1.064924174 1.018353117 0.880941652 1 1.178825273 1.198278725  
 0.925602449 1.122894542 1 0.946849258 0.689519185 0.913987711  
 0.827799988 1 1.374196014 1.636748515 1.329056383 1.072809815 1  
 0.951314467 0.848046152 0.848291055 0.998304866 0.783125478 1  
 0.994268906 0.655059635 0.788374437 0.657354042 0.708830129 1  
 1.044670954 0.947794799 1.120684907 0.981929081 1.140816637 0.881753341

YBR070C YBR070C::YBR070C::not yet annotated 1 1.125991165 1.180205308  
0.900738955 1.273198383 1 0.923093838 0.932197602 1.093076585  
1.290735922 1 1.044023174 0.882856829 1.019486824 1.189820808 1  
0.769899803 0.713331327 1.207855569 1 1.187538297 1.567133795  
0.960300006 1.501090658 1 1.115649293 1.30063142 1.290559057  
0.979042682 1.022303344 1 1.075654631 1.447668348 1.342086226  
1.346661513 1.364624889 1 1.387615466 1.685304789 1.102285489  
1.304728083 1.200782214 1.195226768  
YNL156C YNL156C::YNL156C::molecular\_function unknown 1 1.350309914  
1.287071706 1.355151299 1.081476285 1 1.269328966 1.182469061  
1.262451943 1 1.34965286 1.735688327 1.784423117 1.010623459 1  
1.672793367 0.920412903 1.570176384 1.64992991 1 1.850225323  
1.651020644 2.333330508 1.769379421 1 1.036637083 1.09593871  
1.298491445 1.24824757 1.041492744 1 0.917949565 0.619702048  
0.641866921 0.694383913 0.565575629 1 1.194555574 1.01872829  
1.648233295 1.206594617 1.662187472 0.999962573  
YBR072W YBR072W::HSP26::heat shock protein 26 0.491283499  
0.654820336 0.829664314 1.057286562 0.433440636 0.596421407  
1.00830975 1.300977241 0.396652923 0.724536148 1.693252135  
1.06514009 1 1.60203502 2.307987629 7.603397636 13.07596705 1  
1.2017874 2.954724319 7.154195423 6.229086205 1 1.08286543  
1.937893313 3.0273434 1.400562937 1.825602421 1 3.048947052  
6.626672712 10.16412353 18.26063629 5.677570459 1 2.596299018  
4.21046964 3.378703937 1.682470141 10.85618339 2.235468049  
YNL158W YNL158W::YNL158W::molecular\_function unknown 1 0.748017767  
0.583386379 0.796934465 0.573679875 1 0.716000675 0.769350741  
0.584113639 0.63472029 1 0.74446958 0.74817854 0.94662867 1  
0.947995818 0.591563501 0.692752829 1 1.349952504 0.746654943  
0.725601431 1.593098795 1 1.028752414 1.069062199 1.137403626  
1.228183273 1.217816627 1.183521918 0.727781536 1.059577687  
1.304277053 0.800054475 1 1.293379441 0.986076773 1.872558531  
0.976095019 1.610131953 0.810827823  
YBR074W YBR074W::YBR074W::molecular\_function unknown 1 1.077621061  
0.896916939 1.298547242 0.853142802 1 1.27967828 1.256143191  
0.821243909 1 1.259683899 1.016410954 0.267935059 1.09861488 1  
0.552717285 0.522361673 0.416966699 0.58629591 1 0.419915928  
0.659078733 1 0.860424563 0.780651912 0.882059556  
1.157127389 0.80220701 1 0.812948655 0.418950161 0.663657635  
0.913476839 0.270712454 1 0.813868152 0.434173402 0.923557745  
0.511160361 0.598161925 0.477215095  
YNL160W YNL160W::YGP1::may be involved in cellular adaptations prior to  
stationary phase 1 0.957886706 0.894704361 1.607364886 1.291399363 1  
1.077778454 1.57219871 1.760178666 1 1.501426708 2.297819935  
4.099899856 2.147860886 1 3.067096168 4.629392749 8.508892661  
3.86074747 1 2.165549851 1.961150446 4.277435399 3.999168574 1  
1.461965613 1.727074524 1.828029849 0.971653241 0.966967435 1  
1.064552281 1.21148548 1.57587811 1.824306198 5.274632391 1  
2.008921198 2.277293885 1.532613199 1.399024375 3.564927776 1.876462133  
YBR076W YBR076W::ECM8::ExtraCellular Mutant 1 1.229152309 1.309841546  
1.005665156 1.607541189 1 1.034925009 0.960080157 1.49360927  
1.304099541 1 1.025277932 1.153860261 1.186205511 1  
0.854074598 0.491640435 0.396781294 1.024565494 1 1.316653198  
1.253293165 0.712450908 0.903554308 1 0.98084322 0.805908476  
0.723020788 0.906699512 0.867969157 0.842181958 0.896312886  
1.319056427 1.05015131 1 0.860634022 1.469267016 1.329217245  
1.480063037 1.493981668 1.142689274



YBR089W YBR089W::YBR089W::molecular\_function unknown 1 1.350035376  
1.407339616 1.51915259 2.042659056 1 1.427388658 1.361396972  
1.722424643 2.092303731 1 1.195905095 1.671711855 1.885474198  
3.051486292 1 0.462553016 0.360191469 1.32339912 1  
0.523960423 0.410393115 0.505026851 2.014626603 1 0.862436113  
0.856566568 0.745232847 0.861695529 1.064208256 1 0.888301957  
1.268038896 1.065303506 0.913153547 1.092354763 1 1.112292117  
1.14816208 0.968069933 1.437005581 1.494405546 1.308182219  
YBR090CA YBR090CA 1 1.594669311 2.011794101 1.338731666 2.027224772 1  
1.255726663 1.477253965 1.800871198 1.741355711 1 1.738687129  
2.351233922 1.128581146 1 0.628241523 0.576615306 0.440331924  
1.022406531 1 1.983815682 3.111819855 2.238581817 2.060766448 1  
1.333180556 1.434414339 1.074024977 0.990803216 1.108162857  
1.098751807 2.294093998 1.231608337 0.89322661 1.602661078 1  
1.260813434 1.557340624 1.33189145 1.664261327 1.545013456 1.619028756  
YMR006C YMR006C::PLB2::Phospholipase B 2 1 1.03779687 0.623345842  
0.919426662 0.655107517 1 1.076275475 0.939338351 0.625999953  
0.746525388 1 0.993349207 0.63032005 0.42225117 1.038684919 1  
0.780905815 0.43445485 0.540692614 0.376608269 1 0.442733884  
0.400124648 0.397452656 0.443158163 1 1.78422744 1.412865099  
1.266482858 2.636745393 1.094437358 1 1.044581794 1.317029295  
1.511937976 0.94179227 0.985056198 1 1.227268874 1.423483232  
1.222858212 1.689942084 0.463537235 0.912400256  
YBR092C "YBR092C::PHO3::Acid phosphatase, constitutive" 1 1.165498902  
0.726686396 0.94309068 0.641812841 1 1.045704306 0.872817915  
0.828397102 0.771234726 1 0.709373703 0.600916457 0.33786435  
0.512018465 0.885110893 0.628329095 1 0.292143051  
1 0.831672494 0.54672536 0.578486922 1.205282542  
0.718543822 1 0.706037463 0.664797752 0.29380223 0.551342627  
1.126506298 1 1.024479828 0.929149294 0.967894724 1.688155699  
0.737569545 1.036738829  
YOL053CA YOL053CA 1 1.909997365 3.988211677 2.878005309 5.523316424 1  
2.112218673 3.011205286 4.702790449 5.276188988 1 1.958271154  
3.313319121 18.43333439 3.832326178 1 3.226005343 5.64828864  
11.79295547 13.29741683 1 2.388377448 10.33988846 18.80156846  
5.575845804 1 1.252566268 1.942191666 1.540223319 1.005659346  
1.059612849 1 1.211381774 1.501883064 1.874081566 1.447215889  
1.478516571 1 1.431904388 1.337842809 1.252570542 1.395636286  
2.24627091 2.372941073  
YBR094W YBR094W::YBR094W::molecular\_function unknown 1 1.093270949  
0.92700616 1.111900923 1.027761979 1 1.152649213 1.033755349  
1.036784053 0.935861739 1 1.022011601 0.934558549 0.791202741  
1.172481174 1 1.071737283 0.714161714 0.884020732 1.253206185 1  
0.535252582 1 1.017436802 1.023849919 1.165083479  
1.02910518 1.119700568 1 1.166817097 0.978603536 0.773567198  
1.104227126 0.903710002 1 1.064274389 0.996093667 1.190883996  
1.116547577 0.925581793 0.745156034  
YBR096W YBR096W::YBR096W::molecular\_function unknown 1 1.645645744  
1.447679102 1.289591523 1.80589543 1 1.380939727 1.301791573  
1.682219806 1.432953672 1 1.115850416 1.727064044 2.101659092  
1.22578829 1 1.614293766 1.408864128 1.375846901 1.814484312 1  
1.200137288 1.607495277 1.488831341 1.07612784 1 1.160099364  
1.163078137 1.133082946 1.042314276 0.930879457 1 0.825294736  
1.221087228 1.039900768 0.74747898 1.01073326 1 0.955173383  
1.295533774 1.135616784 1.344671753 1.447297718 1.390490964  
YBR098W YBR098W::MMS4::endonuclease 0.970254141 0.94066364  
1.235551351 0.897714569 1.071494268 1.151104312 0.824137532

0.888381651 0.956066155 0.974157361 0.629857044 0.932976526  
0.984908215  
0.959057893 0.863828749 0.876477705 1.073610364 0.993093197  
1.207287701 1.5452408 1 1.19525656 1.286785301 1.206495253  
1.039999138 1.179175093 0.850230918

YLL018CA YLL018CA::COX19::cytochrome oxidase gene 19. Clone containing this region complements respiratory deficient mutants of group G188 (Dr. A. Tzagoloff). Defect affects specifically cytochrome oxidase activity in mitochondria.

1 0.695009814 0.524755753 0.352619336 0.574798822 0.733117534 1  
0.718220179 0.638619822 0.419638895 0.692529084 1.662220078 1  
0.751620451 0.712017209 0.693451002 1.431941518 2.210932197 1.401873981

YNL174W YNL174W::YNL174W::molecular\_function unknown 1 0.578332125  
0.478107854 0.560851169 0.647720436 1 0.504787357 0.479602456  
0.497871576 0.621483403 1 0.527830788 0.286430575 0.764677676 1  
0.340479672 0.101102776 0.185409774 0.297282302 1 0.708442569  
0.623115172 0.654833816 1 0.889398671 0.787389831 0.7735461  
1.082249275 1.012024208 1 0.937525595 0.564658548 0.61227556  
0.910261446 1 1.00323478 0.732680188 1.189497425 0.901159956  
0.739164205 0.794190973

YNL176C YNL176C::YNL176C::molecular\_function unknown 1 0.725885876  
0.606620616 0.799722352 0.693588322 1 0.853257899 0.852147904  
0.571937291 1 1.187007579 0.845921442 0.514933768 0.854002628 1  
1.077210444 0.822522549 0.885590782 0.584242107 1 0.883501781  
0.712736194 0.769129992 0.74928081 1.814605028 1.713786651  
1.145709627 1.312777443 0.998974396 1 0.904712157 0.853902831  
0.89206683 0.841301881 0.660298228 1 1.141676128 1.125576071  
0.944935977 0.559656168 0.906104927 0.688240476

YNL178W "YNL178W::RPS3::Homology to mammalian S3. The AP endonuclease activity of Rps3p is affected by pH, KCl, and beta-mercaptoethanol, but not Triton X-100 or EDTA." 1 1.386514228 1.164367831 0.945392161 1.583675672 1  
1.049682703 0.971714728 1.289399159 1.409322103 1 0.877656506  
0.954454069 0.671973275 1.149425641 1 0.900245522 0.443006177  
0.246759688 0.601899202 1 1.758069568 0.779929815 0.394443933  
0.961083754 1 1.077810786 0.974187844 1.033668309 1.237218974  
1.071190875 1 1.236203178 1.659325228 0.944707884 0.616882518  
1.36285987 1 1.649993808 1.720083616 1.187332572 2.53526411  
1.643570572 1.330948463

YNL180C YNL180C::RHO5::Rho family of small GTPases 1 1.218040797  
1.350170824 1.199808252 1.327163016 1 1.285524379 1.340692815  
1.196389449 1.28457954 1 1.519852205 1.006653901 1.094614315  
1.263524126 1 1.639137006 1.460223211 1.155658999 1.193430532 1  
1.636812193 1.482614396 1.369651628 1.428274458 1 1.425611999  
1.244069382 0.811638576 1.108736587 1 1.141078427 1.325491377  
1.209337324 1.377220949 1.516843525 1 1.395381976 1.240606117  
1.527051763 0.885361141 1.629597717 1.234629811

YNL182C YNL182C::YNL182C::molecular\_function unknown 1 0.805772943  
0.431377864 0.790237313 0.523055021 1 0.637959379 0.544764592  
0.600516383 0.799880177 1 0.424700786 0.263467226 0.26265974  
0.876585972 1 0.369272879 1 0.373725819  
0.205185832 0.502197505 1 0.681608792 0.497140803 0.619435717  
0.816680528 1 0.603638569 0.600375266 0.463773763 0.936708606  
0.876465358 1 0.574279809 0.521012972 0.97094529 0.604318369  
0.41742307 0.717136061

YNL184C YNL184C::YNL184C::molecular\_function unknown 0.967791598  
1.032907932 0.88009312 0.818452127 0.885295886

|             |                                                                                               |             |             |             |             |             |
|-------------|-----------------------------------------------------------------------------------------------|-------------|-------------|-------------|-------------|-------------|
| 0.977591483 | 0.887345154                                                                                   | 0.979445941 | 1.313468129 | 0.918291705 | 1           |             |
| 0.78317032  | 0.887885051                                                                                   | 1.0982944   | 1           | 1.077272053 |             |             |
| 1.048538975 | 0.992515804                                                                                   | 1           | 1.154111111 | 1.155431577 | 1.235790726 |             |
| 1.217323877 | 1                                                                                             | 0.798218308 | 0.983378523 | 0.674944407 | 0.919048639 | 1           |
| 0.919776016 | 0.87620069                                                                                    | 0.868457094 | 0.636685275 | 0.81673103  | 0.950927634 |             |
| YNL198C     | YNL198C::YNL198C::molecular_function unknown                                                  |             |             |             | 0.833581282 |             |
| 0.825643077 | 0.820376022                                                                                   | 0.967371702 | 0.874312076 |             |             |             |
| 0.883425537 | 0.84635369                                                                                    | 0.893770895 | 0.590125824 | 1.410723134 |             |             |
| 0.547261008 | 0.992819797                                                                                   | 1.01242753  | 0.693150707 | 1           | 0.724001214 |             |
| 1.245239137 | 0.557617708                                                                                   | 0.817658812 |             |             | 0.751682562 |             |
| 1           | 0.80298778                                                                                    | 0.741877197 | 1.043482643 | 1           |             |             |
| 0.670954577 | 1.272264529                                                                                   | 0.81638696  |             |             |             |             |
| YBR112C     | YBR112C::CYC8::General repressor of transcription (with Tup1p); mediates glucose repression   |             |             |             |             | 1           |
| 0.954938808 | 1                                                                                             | 1.119524783 | 1.083041249 | 1.087794212 | 0.921534157 | 1           |
| 1.011494745 | 1.038468039                                                                                   | 0.877783208 | 0.874170076 | 1           | 1.023620602 |             |
| 0.84351706  | 0.749497183                                                                                   | 0.952569881 | 1           | 0.808911308 | 0.914911031 |             |
| 0.570351888 | 0.841428066                                                                                   | 1           | 0.694050748 | 0.683281489 | 0.687305502 |             |
| 0.604679419 | 0.969859549                                                                                   | 1           | 0.898224999 | 0.819587794 | 0.670825028 |             |
| 0.718194079 | 0.784311634                                                                                   | 1           | 0.870481868 | 0.818292246 | 1.139188279 |             |
| 0.970390825 | 0.858398965                                                                                   | 0.961435195 |             |             |             |             |
| YNL200C     | YNL200C::YNL200C::molecular_function unknown                                                  |             |             |             | 1           | 1.276253617 |
| 1.49704989  | 1.427576682                                                                                   | 1.490602943 | 1           | 1.348835606 | 1.57893461  |             |
| 1.516218746 | 1.626436247                                                                                   | 1           | 1.680658198 | 2.482781132 | 4.999689265 |             |
| 2.016521408 | 1                                                                                             | 3.805283391 | 4.306657065 | 5.127195251 | 3.633395468 | 1           |
| 3.119394364 | 2.506785566                                                                                   | 3.712394153 | 2.664226556 | 1           | 1.200922074 |             |
| 1.657840164 | 1.863765635                                                                                   | 1.12502111  | 1           | 0.999892954 | 1.48785263  |             |
| 2.736910017 | 2.154180092                                                                                   | 1.523118367 | 1           | 1.645225723 | 1.900014286 |             |
| 1.686375423 | 1.392846133                                                                                   | 3.497155134 | 1.136559933 |             |             |             |
| YBR114W     | YBR114W::RAD16::Nucleotide excision repair protein with DNA helicase domain of Snf2p family   |             |             |             |             | 1           |
| 1.084939909 | 1.112092826                                                                                   | 1.038731293 | 1.031646333 | 1           | 1.068893587 |             |
| 1.224228501 | 0.859238509                                                                                   | 1.038853819 | 1           | 1.611420772 | 1.37031524  |             |
| 1           | 0.674973469                                                                                   | 1.271331872 | 1           | 0.912786631 | 1.042081676 |             |
| 1.076164572 | 0.9993352                                                                                     | 0.987153612 | 1           | 1.288415398 | 1.038660904 |             |
| 1.039448188 | 1.263928872                                                                                   | 0.864019012 | 1           | 0.989096474 | 1.001816788 |             |
| 1.134269291 | 0.853741463                                                                                   | 1.156818311 | 0.871245884 |             |             |             |
| YNL202W     | YNL202W::SPS19::late sporulation specific gene which may function during spore wall formation |             |             |             |             | 1           |
| 1.30030651  | 1                                                                                             | 1.146637147 | 1.228366463 | 1.597475009 | 1.785122429 | 1           |
| 1.091198651 | 1.603827081                                                                                   | 2.770691891 | 2.005570634 | 1           | 1.123472243 |             |
| 2.430005408 | 2.188137949                                                                                   | 1           | 1.531217265 | 1.716265405 | 3.283618442 | 1           |
| 0.689257649 | 0.727235584                                                                                   | 0.713124783 | 0.986106509 | 0.85177769  | 1           |             |
| 0.650972366 | 0.771010572                                                                                   | 0.82608573  | 1.106571021 | 1.410248011 | 1           |             |
| 0.620169751 | 0.757403088                                                                                   | 1.141287871 | 1.070786264 | 1.144078575 | 1.213614897 |             |
| YBR116C     | YBR116C::YBR116C::molecular_function unknown                                                  |             |             |             | 0.592249055 |             |
| 0.750481039 | 0.676478351                                                                                   | 0.829186746 | 0.504873571 | 0.632668005 |             |             |
| 0.863886973 | 1.344343257                                                                                   | 0.405092347 | 0.527800797 | 4.115689539 |             |             |
| 0.861510315 | 0.169390309                                                                                   | 0.227598103 | 0.664909877 | 1.067232055 | 1           |             |
| 0.859914793 | 1.75739406                                                                                    | 3.35443498  | 0.818284146 | 0.893709385 |             |             |
| 1.109337998 | 1.373859489                                                                                   | 0.75784262  | 1           | 0.754378591 | 1.221791757 |             |
| 1.297940817 | 1.231908197                                                                                   | 1.952320202 | 1           | 0.873651465 | 1.134872278 |             |
| 0.963598241 | 1.120006167                                                                                   | 1.090151884 |             |             |             |             |
| YNL204C     | YNL204C::SPS18::sporulation-specific protein                                                  |             |             |             |             |             |
| 0.994188143 | 0.91729393                                                                                    | 0.904413791 | 0.760080313 | 0.960610532 |             |             |
| 0.95652809  | 0.783660771                                                                                   | 0.898001709 | 0.858896027 | 1           |             |             |
| 0.502088657 | 1.31955625                                                                                    | 1.346900852 | 1           | 0.798347866 | 2.051136303 |             |

|         |                                                                                                                                                                             |             |             |             |             |             |             |             |
|---------|-----------------------------------------------------------------------------------------------------------------------------------------------------------------------------|-------------|-------------|-------------|-------------|-------------|-------------|-------------|
|         | 1.057120678                                                                                                                                                                 | 0.906141508 | 1           | 0.893118174 | 1.006699296 | 1.306163369 |             |             |
|         | 1.338077157                                                                                                                                                                 | 1           | 0.847402076 | 0.682917005 | 1.001147625 | 1           |             |             |
|         | 1.141676158                                                                                                                                                                 | 1.335841487 | 1.649174582 | 1.081197854 | 1.609032343 |             |             |             |
| YBR118W | YBR118W::TEF2::translational elongation factor EF-1 alpha                                                                                                                   |             |             |             |             |             | 1           |             |
|         | 1.232889391                                                                                                                                                                 | 0.833655993 | 1.003252421 | 0.885524916 | 1           | 1.246562008 |             |             |
|         | 1.054696145                                                                                                                                                                 | 0.787314988 | 0.965820611 | 1           | 0.941990943 | 0.856350014 |             |             |
|         | 0.614375521                                                                                                                                                                 | 0.856948273 | 1           | 0.910079591 | 0.697611974 | 0.647528582 |             |             |
|         | 0.892939292                                                                                                                                                                 | 1           | 0.838411859 | 0.379558407 | 0.242513783 | 0.662482737 | 1           |             |
|         | 0.811334885                                                                                                                                                                 | 0.75697503  | 0.9152621   | 1.209705833 | 1.185619227 | 1           |             |             |
|         | 1.939998805                                                                                                                                                                 | 0.970868289 | 0.875988537 | 0.63982332  | 0.57927294  | 1           |             |             |
|         | 1.00591703                                                                                                                                                                  | 0.90754993  | 0.831623125 | 1.028625294 | 1.041463487 | 0.795066585 |             |             |
| YBR120C | YBR120C::CBP6::Translational activator of COB mRNA                                                                                                                          |             |             |             |             |             |             |             |
|         | 0.677207865                                                                                                                                                                 | 1.045434904 | 0.949305928 | 1.417547067 |             | 0.825716473 |             |             |
|         | 0.903968401                                                                                                                                                                 | 1.355454543 | 1.201855255 |             | 0.708911615 | 0.881078266 |             |             |
|         | 1.263219811                                                                                                                                                                 | 0.865426279 | 1           | 0.976517278 |             | 0.700113141 | 1.233613259 |             |
|         | 1.628118864                                                                                                                                                                 | 2.303027161 |             | 1           | 0.629925257 | 0.834831925 |             |             |
|         | 0.424348183                                                                                                                                                                 | 0.632268725 | 0.768760055 | 1           | 1.028518556 | 0.987409823 |             |             |
|         | 1.162644267                                                                                                                                                                 | 1           | 1.031336526 | 0.925444873 | 1.184715107 | 1.529468315 |             |             |
|         | 2.497706706                                                                                                                                                                 | 1.316938451 |             |             |             |             |             |             |
| YBR122C | YBR122C::MRPL36::Mitochondrial ribosomal protein MRPL36 (YmL36)                                                                                                             |             |             |             |             |             | 1           |             |
|         | 1.265209622                                                                                                                                                                 | 1.377780967 | 1.318253372 | 1.610367605 | 1           | 1.119497822 |             |             |
|         | 1.17385332                                                                                                                                                                  | 1.653647798 | 1.489909018 | 1           | 1.065161013 | 1.34807666  |             |             |
|         | 1.561504123                                                                                                                                                                 | 1.338402624 | 1           | 1.713896323 | 1.353518599 | 1.227370489 |             |             |
|         | 1.830397015                                                                                                                                                                 | 1           | 1.71192906  | 1.554794415 | 2.022956188 | 1.583021281 | 1           |             |
|         | 1.036609599                                                                                                                                                                 | 1.378096999 | 0.814621138 | 0.837648219 | 1.078772033 |             |             |             |
|         |                                                                                                                                                                             | 0.804550532 | 1.443160578 | 1           | 1.370273431 | 1.544423978 | 1.122778856 |             |
|         | 1.354214358                                                                                                                                                                 | 1.752346442 | 1.088400659 |             |             |             |             |             |
| YBR136W | "YBR136W::MEC1::Required for mitotic growth, DNA repair and mitotic recombination, regulates phosphorylation of Rad53p, required for dmc1 arrest and meiotic recombination" |             |             |             |             |             | 1           |             |
|         | 1.186094405                                                                                                                                                                 | 1.08824455  | 1.480297299 | 1.518562194 | 1           | 1.259842215 |             |             |
|         | 1.308106334                                                                                                                                                                 | 1.274695585 | 1.285562459 | 1           | 1.225080391 | 0.819812458 |             |             |
|         | 0.520678372                                                                                                                                                                 | 0.815407726 | 1           | 1.754200265 | 1.451850433 | 0.677948288 |             |             |
|         | 0.910511082                                                                                                                                                                 |             | 0.882194755 | 0.892788996 | 1.158843877 | 1.053906297 |             |             |
|         | 0.914769604                                                                                                                                                                 | 1           | 0.919186901 | 1.139224555 |             | 0.917483363 | 1           |             |
|         | 1.12355426                                                                                                                                                                  | 1.153449186 |             | 1.588364587 | 1.331301924 |             |             |             |
| YBR138C | YBR138C::HDR1::High-Dosage Reductional segregation defective. Converts reductional segregation to equational when borne on a 2um plasmid                                    |             |             |             |             |             | 1           |             |
|         | 1.34043403                                                                                                                                                                  | 1.475563619 | 1.544640692 | 1.561409997 | 1           | 1.335678851 |             |             |
|         | 1.504900961                                                                                                                                                                 | 1.727489682 | 1.565317946 | 1           | 1.398315035 | 1.88548108  |             |             |
|         | 2.273997358                                                                                                                                                                 | 1.311231138 | 1           | 1.595650038 | 1.537640785 | 1.588009848 |             |             |
|         | 1.512534715                                                                                                                                                                 | 1           | 1.90676202  | 2.876078664 | 4.323712362 | 1.731584339 | 1           |             |
|         | 0.964337941                                                                                                                                                                 |             | 0.867455602 | 0.764692507 | 0.945749935 | 1.065061081 |             |             |
|         | 0.979705939                                                                                                                                                                 | 0.681548391 | 0.939412016 |             | 1           | 1.275852497 | 1.268881778 |             |
|         | 1.211376261                                                                                                                                                                 | 2.264928977 | 1.083146878 |             |             |             |             |             |
| YBR140C | "YBR140C::IRA1::Inhibitory regulator of the RAS-cAMP pathway, negatively regulates cAPK by antagonizing CDC25"                                                              |             |             |             |             |             | 1           | 1.356930826 |
|         | 1.309850084                                                                                                                                                                 | 1.277344503 | 1.222799255 | 1           | 1.324822195 | 1.414827878 |             |             |
|         | 1.446392894                                                                                                                                                                 | 1.34450205  | 1           | 1.141986946 | 1.350061328 | 1.307575297 |             |             |
|         | 1.048317069                                                                                                                                                                 | 1           | 1.018738579 | 0.928346156 | 0.731576654 | 0.642442437 | 1           |             |
|         | 0.85095206                                                                                                                                                                  | 0.993936041 | 0.780426158 | 0.794644512 | 1           | 0.901394932 |             |             |
|         | 0.962349235                                                                                                                                                                 | 1.010773845 | 1.091884024 | 1.058064218 | 1           | 0.860336876 |             |             |
|         | 0.850606896                                                                                                                                                                 | 0.591211145 | 0.820711878 | 0.687146147 | 1           | 0.938442787 |             |             |
|         | 0.786456134                                                                                                                                                                 | 1.012249323 | 0.985681074 | 0.886962026 | 1.068261305 |             |             |             |
| YBR142W | YBR142W::MAK5::Necessary for maintenance of dsRNA killer plasmids. Is predicted to encode an DEAD-box RNA helicase                                                          |             |             |             |             |             | 1           | 1.169848623 |
|         | 1.034600888                                                                                                                                                                 | 1.048694068 | 1           | 1.00968124  | 0.954157105 | 0.90501589  |             |             |

|             |                                                |             |             |             |             |             |  |
|-------------|------------------------------------------------|-------------|-------------|-------------|-------------|-------------|--|
| 0.975465752 | 1                                              | 0.810329883 | 0.794920705 | 0.546427526 | 0.919448414 |             |  |
| 1.35419182  | 1.051872323                                    | 0.655226783 | 1           | 0.717539861 |             |             |  |
| 1           | 0.867936808                                    | 0.612310072 | 0.696009561 | 0.825530089 | 0.882568258 | 1           |  |
| 0.866216012 | 0.609318986                                    | 0.42225639  | 0.65760268  | 0.691179156 | 1           |             |  |
| 0.874746269 | 0.799409611                                    | 0.863825116 | 0.997992883 | 0.678482518 | 0.797693476 |             |  |
| YHR110W     | YHR110W::ERP5::Emp24p/Erv25p related protein 5 |             |             |             | 1           | 0.919897071 |  |
| 1.243814611 | 0.966699529                                    | 1.520864009 | 1           | 1.045275822 | 1.052021667 |             |  |
| 1.56265483  | 1.275246519                                    | 1           | 0.868613435 | 1.08607576  | 1.596089141 |             |  |
| 1.440286503 | 1                                              | 1.209932504 | 1.002435449 | 0.922491043 | 1.601970877 | 1           |  |
| 1.517035472 | 2.119505778                                    | 2.119747347 | 1.503336379 | 1           | 0.868893106 |             |  |
| 0.776312768 | 0.928515142                                    | 1.302645322 | 1.077587009 | 1           | 0.673997609 |             |  |
| 0.576662952 | 0.458443546                                    | 0.716962611 | 0.498493514 | 1           | 0.705044769 |             |  |
| 0.64514677  | 0.971729911                                    | 0.801842691 | 0.695697733 | 0.961435195 |             |             |  |
| YHR112C     | YHR112C::YHR112C::molecular_function unknown   |             |             |             | 1           | 0.824932804 |  |
| 0.902351971 | 1.087738262                                    | 0.873639879 | 1           | 1.010163067 | 1.045944456 |             |  |
| 0.99067865  | 1.202010463                                    | 1           | 0.910058912 | 1.258553644 | 1.272491711 |             |  |
| 1.14826081  | 1                                              | 1.600452224 | 0.612685645 | 1.516174724 | 1.610035217 | 1           |  |
| 1.193707256 | 2.046265713                                    | 1.324396957 | 1.354776405 | 1           | 0.85540538  |             |  |
| 0.708150544 | 0.927879079                                    | 1.129460547 | 1.000624933 | 1           | 0.517757517 |             |  |
| 0.621330083 | 0.412041164                                    | 0.634133251 | 0.60618942  | 1           | 0.893745411 |             |  |
| 0.663070751 | 1.083280529                                    | 0.949875585 | 0.744715838 | 0.891385238 |             |             |  |
| YHR114W     | YHR114W::BZZ1::Associated with Beelp           |             |             |             | 1           | 0.561051577 |  |
| 0.796074278 | 0.724684318                                    | 0.581392656 | 1           | 0.760666781 | 0.80122262  |             |  |
| 0.74832705  | 0.611284674                                    | 1           | 0.710422523 | 0.857598874 | 0.656895745 |             |  |
| 0.758156693 | 1                                              | 1.247992558 | 1.060361131 | 1.403516543 | 1.475705826 | 1           |  |
| 1.043435466 | 1.260033576                                    | 0.837883776 | 0.779914002 | 1           | 0.971876262 |             |  |
| 0.844260405 | 1.433138114                                    | 1.111881717 | 0.821062505 | 1           | 0.717525006 |             |  |
| 0.295930577 | 0.208480509                                    | 0.272411847 | 0.375336377 | 1           | 0.868138606 |             |  |
| 0.362439247 | 0.56339663                                     | 0.682949958 | 0.634930249 | 0.855484646 |             |             |  |
| YHR116W     | YHR116W::YHR116W::molecular_function unknown   |             |             |             | 1           | 0.975947589 |  |
| 1.441212889 | 1.288441906                                    | 1.451490951 | 1           | 1.104809434 | 1.371018143 |             |  |
| 1.339680745 | 1.317144777                                    | 1           | 1.255948227 | 1.158221256 | 1.735714662 |             |  |
| 1.236335588 | 1                                              | 1.634249384 | 1.506948918 | 1.745793093 | 1.745707434 | 1           |  |
| 1.2785442   | 1.379442132                                    | 1           | 1.205648225 | 1           | 0.787573248 | 0.988564393 |  |
| 1.004374002 | 0.826151315                                    | 0.901911651 | 1           | 1.018538985 | 0.937901329 |             |  |
| 0.896569239 | 1.00710978                                     | 1.804353242 | 1           | 1.007824482 | 0.719996709 |             |  |
| 0.95492365  | 0.802891952                                    | 1.7064565   | 0.895763354 |             |             |             |  |
| YHR130C     | YHR130C::YHR130C::molecular_function unknown   |             |             |             | 1           | 1.3028495   |  |
| 1.392270683 | 1.26946948                                     | 1.717579044 | 1           | 1.106243354 | 1.082121104 |             |  |
| 1.659650548 | 1.539584167                                    | 1           | 0.979188597 | 1.14036549  | 1.143676203 | 1           |  |
| 2.111725724 | 1.809524552                                    | 1.47512265  | 1           | 1.018888772 | 1.267503135 |             |  |
| 1.044834474 | 1                                              | 1.023723418 | 1.133124091 | 1.443188212 | 1.050448903 |             |  |
| 1.066824385 | 1                                              | 0.874976024 | 0.542298032 | 0.727574857 | 0.795952606 |             |  |
| 0.391596775 | 1                                              | 0.900246405 | 0.599391898 | 1.125666989 | 0.867238212 |             |  |
| 0.981956809 | 0.87825089                                     |             |             |             |             |             |  |
| YHR132C     | YHR132C::ECM14::ExtraCellular Mutant           |             |             |             | 1           | 0.859918924 |  |
| 0.907602365 | 0.971676552                                    | 1           | 0.950222921 | 0.892034087 | 0.813828554 |             |  |
| 0.921696653 | 1                                              | 0.848401271 | 0.968089124 | 0.824976362 | 0.875246141 | 1           |  |
| 1.299157799 | 0.800537472                                    | 1           | 1.066062663 | 1           | 1.282502043 | 1.020856555 |  |
| 1.238362683 | 0.795648752                                    | 1           |             |             | 0.291452163 | 1           |  |
| 0.862094894 | 0.688106017                                    |             |             | 1.435116601 |             |             |  |
| 2.568205269 |                                                |             |             |             |             |             |  |
| YHR134W     | YHR134W::WSS1::weak suppressor of smt3         |             |             |             | 1           | 0.866441059 |  |
| 1.154577595 | 0.842539701                                    | 1.363839178 | 1           | 0.948005712 | 0.893546286 |             |  |
| 1           | 0.841032017                                    | 0.911017144 | 1.045705927 | 1.088107113 | 1           | 0.984560718 |  |
| 0.844981279 | 0.762727111                                    | 1           | 1.635822277 | 3.15959646  |             |             |  |
| 1.571857586 | 1                                              | 1.063691867 | 1.082498127 | 0.752480433 | 0.60054651  |             |  |

0.895834661 1 1.128325032 1.427119294 1.552812036 1.498223897  
 1.871981737 1 0.803902065 1.224188311 0.62128664 1.189360184  
 0.604609775 0.472836979

**YHR136C** YHR136C::SPL2::Suppressor of *plc1*-delta. Isolated as a dosage suppressor of the temperature-sensitive phenotype of a *plc1* null mutant. Also suppresses the hyperosmotic-sensitive phenotype of the *plc1* null mutant. 1  
 1.320686754 1.563942659 1.1808797 1.715977133 1 1.076646209  
 1.27479927 1.81717023 1.394869199 1 1.052219648 1.229542153  
 1.731208197 1.209824576 0.655728571  
 0.552463152 0.347882872 1 1.289614053 0.974750101 1.423233733  
 1.992201264 1.272779121 1 0.935232166 0.555057273 0.957321199  
 1.21010282 0.421498825 1 0.824543902 0.519242921 0.655075959  
 0.669924348 0.436221666 0.673354851

**YHR138C** YHR138C::YHR138C::molecular\_function unknown 1 1.214551832  
 1.59614307 1.016542493 1.633172261 1 1.236466215 1.401332706  
 1.537588351 1 1.638637812 2.213293109 3.265050584 1.082870291 1  
 2.237794191 2.462255408 2.721770179 3.682366237 1 3.149820523  
 6.957453275 5.788532212 3.15149655 1 1.062346332 1.305019636  
 1.024371542 1.132488497 1 1.333553348 2.065730057 2.278327421  
 2.554314776 2.330530779 1 1.11929031 1.23947203 0.888445204  
 1.345343958 1.279362729 2.176801317

**YHR140W** YHR140W::YHR140W::molecular\_function unknown 1 1.195948343  
 1.380719092 1.288733756 2.072499212 1 1.138712433 1.38240724  
 1.9598833 1.762822286 1 1.397813468 1.90821234 3.600914596  
 1.823099886 1 1.591234861 1.635518499 2.583365579 1.953681374 1  
 1.882248256 1.422727718 3.362763187 1.910913377 1 1.056908169  
 0.833377955 1.168477594 0.956252134 0.813741966 1 1.138720807  
 0.675490287 0.888316483 0.785780412 0.412834693 1 1.05237543  
 0.699164881 0.876610655 0.61381072 0.716892977 0.575284973

**YNL206C** "YNL206C::RTT106::Regulator of Ty1 Transposition - same phenotype as RTT101 - RTT105, disruption causes increase in Ty1 transposition. Isolated from the same screen as the other named RTT genes." 1 1.100497041 0.988072821  
 1.158848727 1.171683074 1 1.033196167 1.022178929 1.009436706  
 1.257621738 1 0.897017364 0.964221073 1.382311746 1  
 0.987026588 0.89923503 0.770029323 1.127912795 1 1.03948865  
 0.909252726 1 0.817202835 0.823819328 0.906954881 0.856808936  
 0.935007202 1 0.928381756 0.847982175 0.876647819 0.979880867  
 0.878273175 1 0.838983876 0.877115981 1.03053787 0.986421627  
 0.903830817 1.128679366

**YNL208W** YNL208W::YNL208W::molecular\_function unknown 1 1.092201893  
 1.10927782 1.147208689 1.004414221 1 1.038279622 1.099181649  
 1.599907181 1 1.006834957 1.327191321 2.360155273 1.729936075 1  
 0.852762576 1.018831552 1.681533742 2.389360435 1 1.752097091  
 1.962210271 3.208861215 3.346151159 1 1.163351364 1.27045534  
 2.195466022 1.311561159 0.930639933 1 1.011395809 1.68237659  
 3.035883271 1.995980887 1.235637022 1 1.20963301 1.53721093  
 1.952904263 0.7575062 1.219544369 1.58663072

**YNL222W** "YNL222W::SSU72::functionally related to TFIIB, affects start site selection in vivo" 1 1.023728531 1.143850386 0.838990736 1.360101228 1  
 0.880969378 0.831286287 1.209671212 1 0.908545618 0.99949379  
 1.211943763 1 1.041521124 1.973762916 1.132471972 1.990076793 1  
 1.693189068 2.412913763 2.498886527 1.258548132 1 1.063832614  
 0.935405255 0.573381122 0.801341974 0.947420958 1 0.823487617  
 0.906428127 0.952108909 0.802630164 1 0.994868894 1.109500498  
 1.022795875 1.320650866 1.357625992 1.339704695

**YNL224C** YNL224C::YNL224C::molecular\_function unknown 1 0.695120992  
 0.75139364 1.033029066 0.814229475 1 0.968546559 0.952675573

|             |                                                                                                                                               |             |             |             |             |             |
|-------------|-----------------------------------------------------------------------------------------------------------------------------------------------|-------------|-------------|-------------|-------------|-------------|
| 0.77049451  | 1                                                                                                                                             | 0.830022996 | 0.906756549 | 0.654282246 | 1.247904206 | 1           |
| 0.487272086 | 0.57074147                                                                                                                                    | 0.697065934 | 0.615026868 | 1           | 0.765611315 |             |
| 1.055949897 | 0.986922856                                                                                                                                   | 0.844685344 | 1           | 1.007913148 | 1.131411846 |             |
| 1.204683429 | 0.970929876                                                                                                                                   | 1.14717548  | 1           | 1.070837899 | 1.811882064 |             |
| 1.428296453 | 0.970958261                                                                                                                                   | 1           | 1.289635349 | 1.382632372 | 0.557468534 |             |
| 0.977992771 | 0.888758347                                                                                                                                   |             |             |             |             |             |
| YNL226W     | YNL226W::YNL226W::molecular_function unknown                                                                                                  |             |             |             | 0.864363501 |             |
|             | 1.10231914                                                                                                                                    | 1.180459829 | 1.297155383 | 1.535153168 |             |             |
| 0.870466307 |                                                                                                                                               | 1.608478934 | 1           |             |             | 1           |
| 0.859275071 |                                                                                                                                               | 1.005768993 | 0.761221082 |             |             |             |
| 1.018032704 | 1                                                                                                                                             | 0.772590903 | 0.942745107 |             |             | 1           |
|             | 1.036753396                                                                                                                                   | 1.464692588 |             |             |             |             |
| YNL228W     | YNL228W::YNL228W::molecular_function unknown                                                                                                  |             |             |             | 1           | 0.49321059  |
| 0.834140785 | 0.701999413                                                                                                                                   | 1.1123994   | 1           | 0.614632034 | 0.598004776 |             |
| 1.210390077 | 1                                                                                                                                             | 0.5795209   | 0.548195865 | 0.698308997 | 1.15003644  | 1           |
| 0.464092039 |                                                                                                                                               | 0.608457675 | 0.865586641 | 1           | 0.782937029 | 1.361673955 |
| 0.809976829 | 1.092368837                                                                                                                                   | 1           | 0.576418708 | 0.476812294 | 0.511633183 |             |
| 0.94647322  | 1                                                                                                                                             | 0.722963078 | 0.867180707 | 1.690872256 | 1.694104495 | 1           |
| 0.775277772 | 0.834114671                                                                                                                                   | 0.430626852 | 1.226612929 | 0.723265402 |             |             |
| YNL230C     | "YNL230C::ELA1::similar to mammalian elongin A, interacts with elongin C"                                                                     |             |             |             | 1           | 0.740119914 |
| 0.858893442 | 0.633842234                                                                                                                                   | 0.603764539 | 0.573110636 | 1           | 0.740119914 |             |
| 1           | 0.6733572                                                                                                                                     | 1           | 0.972272802 | 1.023141579 | 0.790357881 |             |
| 1           | 0.494017027                                                                                                                                   | 0.585592533 | 1.109315742 | 0.797830058 | 1           |             |
| 2.228655772 | 1.216349501                                                                                                                                   | 0.952182946 | 1           | 1.198392035 | 1.074194594 |             |
| 1.25140513  | 1.086383533                                                                                                                                   | 1.099132012 | 1           | 0.790892874 | 0.918376839 |             |
| 1.299181818 | 0.935207459                                                                                                                                   | 1.06450549  | 1           | 0.90472449  | 1.1208791   |             |
| 1.137695691 | 0.288982437                                                                                                                                   | 1.266272938 | 0.739902305 |             |             |             |
| YBR144C     | YBR144C::YBR144C::molecular_function unknown                                                                                                  |             |             |             |             |             |
| 0.941478941 |                                                                                                                                               |             | 1.150082601 | 1.118840474 |             |             |
|             | 0.87521616                                                                                                                                    | 1           | 0.450805308 | 0.727438675 | 0.768892653 |             |
| 0.308504238 | 0.625084438                                                                                                                                   |             | 1           | 0.968730158 | 0.999358899 |             |
| 1.046012311 | 1.168799115                                                                                                                                   | 0.845528063 | 0.973620815 |             |             |             |
| 0.884270796 | 0.856752113                                                                                                                                   | 0.861680253 | 0.970745315 | 0.784618415 |             |             |
| 1.299954067 | 0.977196433                                                                                                                                   |             |             |             |             |             |
| YNL232W     | "YNL232W::CSL4::Represses the replication of double-stranded RNA viruses, protecting the host from the otherwise lethal effects of the virus" |             |             |             | 1           |             |
| 0.617816725 | 0.594556223                                                                                                                                   | 0.647785004 | 0.670218608 | 1           | 0.620918142 |             |
| 0.593732323 | 0.834502643                                                                                                                                   | 0.858174689 | 1           | 0.549274264 | 0.490351188 |             |
| 0.56835948  | 0.844420394                                                                                                                                   | 1           | 0.677093099 | 1.260119413 | 0.586823051 | 1           |
| 0.797322973 | 0.968416598                                                                                                                                   | 0.717029094 | 0.662284352 | 1           | 0.912311576 |             |
| 0.733127698 | 1.136861817                                                                                                                                   | 0.994911424 | 1.015629433 | 1           | 0.780434214 |             |
| 0.603366297 | 0.614502497                                                                                                                                   | 0.819647631 | 0.811293784 | 1           | 0.807824731 |             |
| 0.725031394 | 1.052029856                                                                                                                                   | 0.905816088 | 0.927591641 | 0.981574549 |             |             |
| YBR146W     | YBR146W::MRPS9::Probable mitochondrial ribosomal protein S9                                                                                   |             |             |             | 1           |             |
| 1.444786582 | 1.487326675                                                                                                                                   | 1.503946386 | 1.988870558 | 1           | 1.32242545  |             |
| 1.492788009 | 1.589872286                                                                                                                                   | 1.552467547 | 1           | 1.156955004 | 1.241120331 |             |
| 1.23808258  | 1.219010008                                                                                                                                   | 1           | 1.133974455 | 0.598935131 | 1           |             |
| 1.086542939 | 1.607329033                                                                                                                                   | 1.881930898 | 1           | 1.030461196 | 1.163621237 |             |
| 0.9403882   | 1.000365518                                                                                                                                   | 0.888134987 | 1           | 1.143569832 | 1.456370792 |             |
| 0.776187059 | 0.814052514                                                                                                                                   | 1.702458817 | 1           | 1.305396431 | 1.353921748 |             |
| 0.92678978  | 1.277353609                                                                                                                                   | 1.925585077 | 1.130430592 |             |             |             |
| YNL246W     | YNL246W::VPS75                                                                                                                                |             |             |             | 1           |             |
| 0.87284325  | 1                                                                                                                                             | 0.992459109 | 1.048262716 | 1.024635726 | 1.100199583 | 1           |
| 0.969634963 | 0.893977198                                                                                                                                   | 1.074844532 | 0.938771    | 1           | 0.608413309 |             |
| 0.451425305 | 0.525915749                                                                                                                                   | 0.670469958 | 1           | 1.203357215 | 1.147756814 |             |
| 1.299750376 | 1.008678572                                                                                                                                   | 1           | 0.813911848 | 0.903517115 | 1.020613882 |             |
| 0.996510786 | 0.914431228                                                                                                                                   | 1           | 0.874858139 | 0.764790915 | 0.781248467 |             |

|         |                                                                                                       |             |             |             |             |             |   |
|---------|-------------------------------------------------------------------------------------------------------|-------------|-------------|-------------|-------------|-------------|---|
|         | 0.88612124                                                                                            | 0.685409375 | 1           | 0.969082275 | 0.693426754 | 0.902563602 |   |
|         | 0.483318448                                                                                           | 0.885963393 | 0.598051217 |             |             |             |   |
| YNL246W | YNL246W::VPS75                                                                                        | 1           | 1.154367538 | 1.159984569 | 0.963120666 |             |   |
|         | 0.950317922                                                                                           | 1           | 1.135092875 | 0.986858373 | 1.059758273 | 1.173723378 | 1 |
|         | 0.956058289                                                                                           | 0.909003891 | 1.17773209  | 1.008657769 | 1           | 0.527228579 |   |
|         | 0.436116659                                                                                           | 0.649306736 | 0.924845611 | 1           | 1.22149327  | 1.110372051 |   |
|         | 1.112726997                                                                                           | 1.350146085 | 1           | 1.36314763  | 1.195174453 | 1.413223569 |   |
|         | 1.492977187                                                                                           | 1           | 0.913845321 | 0.905452414 | 0.706944162 | 0.977152545 | 1 |
|         | 0.78288954                                                                                            | 0.881568471 | 0.867419619 |             | 0.731659547 | 1.058629408 |   |
| YBR160W | YBR160W::CDC28::Catalytic subunit of the main cell cycle cyclin-dependent kinase                      | 1           | 1.184216979 | 1.256480998 | 1.143232046 | 1.511915405 | 1 |
|         | 1.190456491                                                                                           | 1.168834032 | 1.438433689 | 1.248033037 | 1           | 0.962984308 |   |
|         | 1.09080465                                                                                            | 1.481294921 | 1.481014524 | 1           | 0.969974214 | 0.881859339 |   |
|         | 0.841231473                                                                                           | 1.398053546 | 1           | 1.322451546 | 1.270256282 | 0.928930362 |   |
|         | 1.507970645                                                                                           | 1           | 1.206899295 | 1.321530458 | 1.151044495 | 0.938641457 |   |
|         | 1.044244639                                                                                           | 1           | 1.111183675 | 1.205173057 | 1.412632201 | 0.938683188 | 1 |
|         | 1.024626353                                                                                           | 0.983664488 | 0.891659818 | 1.016585    | 1.245962275 | 1.182967981 |   |
| YNL248C | YNL248C::RPA49::49-kDa alpha subunit of RNA polymerase A                                              | 1           |             |             |             |             |   |
|         | 0.849549687                                                                                           | 0.593193896 | 0.768436608 | 0.721512093 | 1           | 0.722276745 |   |
|         | 0.629044939                                                                                           | 0.866317164 | 0.834615309 | 1           | 0.624708401 | 0.398068254 |   |
|         | 0.352944122                                                                                           | 0.839667708 | 1           | 0.174973077 | 0.231482942 | 0.345365405 | 1 |
|         | 0.39904761                                                                                            | 0.412890611 | 0.327496198 | 0.490463416 | 1           | 0.788940481 |   |
|         | 0.56369612                                                                                            | 0.68058362  | 0.943598189 | 0.681994724 | 1           | 0.706233762 |   |
|         | 0.614036095                                                                                           | 0.405730306 | 0.804114158 | 1.046652152 | 1           | 0.726975432 |   |
|         | 0.575034053                                                                                           | 0.745808092 | 0.963632367 | 0.466428026 | 0.726767905 |             |   |
| YBR162C | YBR162C::TOS1::Target of SBF                                                                          | 1           | 1.175083161 | 0.73865736  |             |             |   |
|         | 0.810713514                                                                                           | 0.760153589 | 1           | 0.946164747 | 0.873275844 | 0.776114922 |   |
|         | 0.845252854                                                                                           | 1           | 1.110982776 | 0.692853922 | 0.473302878 | 0.767162388 | 1 |
|         | 1.161751906                                                                                           | 0.751125339 | 0.690591414 | 0.427019712 | 1           | 0.384125592 |   |
|         | 0.313073232                                                                                           | 0.189566594 | 0.308701475 | 1           | 0.927731087 | 0.754320462 |   |
|         | 1.100382693                                                                                           | 1.448036347 | 0.669564505 | 1           | 0.668156363 | 0.747424413 |   |
|         | 0.910864366                                                                                           | 0.574536344 | 0.363030506 | 1           | 0.883207902 | 0.727301204 |   |
|         | 0.840659699                                                                                           | 1.030194533 | 0.715397716 | 0.641832375 |             |             |   |
| YBR163W | YBR163W::DEM1::weak similarity to Ptalp (pre-tRNA processing protein)                                 | 1           | 1.089374299 | 0.964446453 | 1.275583384 | 1.15777597  | 1 |
|         | 1.148387361                                                                                           | 1.123902634 | 0.949167942 | 0.977710903 | 1           | 0.939347712 |   |
|         | 0.891547969                                                                                           | 0.671790619 | 1.106103342 | 1           | 0.982967773 | 0.910658972 |   |
|         | 0.779167384                                                                                           | 1           | 0.918646163 | 0.53852989  | 0.558833902 | 1           |   |
|         | 0.912194998                                                                                           | 0.789073417 |             | 0.949180898 | 1.038859167 | 1           |   |
|         | 0.884886516                                                                                           | 0.871829139 | 0.703348916 |             | 0.905611962 | 0.857400439 |   |
|         | 0.84562239                                                                                            |             | 0.952907493 | 0.844977137 |             |             |   |
| YBR165W | YBR165W::UBS1::General positive regulator of CDC34; Suppress some cdc34 mutations when over-expressed | 1           | 1.286905303 | 1.281483603 | 1.268173994 |             |   |
|         | 1.343092264                                                                                           | 1           | 1.203840104 | 1.129841185 | 1.713348558 | 1.258759257 | 1 |
|         | 1.028614765                                                                                           | 1.262846446 | 1.271869283 | 1.280880665 | 1           | 1.122999005 |   |
|         | 1.121929989                                                                                           | 1.223993216 | 1           | 1.298292491 | 1.684552008 | 1.373520032 |   |
|         | 1.101863191                                                                                           | 1           | 1.006793716 | 0.956877441 |             | 1.169192359 |   |
|         | 1.20417112                                                                                            | 1.019867787 | 1.080396684 | 0.885836923 | 0.950622986 | 1           |   |
|         | 1.25665973                                                                                            | 1.229429492 | 1.204895392 | 1.233819477 | 1.308747208 | 1.141813714 |   |
| YBR167C | YBR167C::POP7::Processing of Precursors                                                               | 1           | 1.234515096 |             |             |             |   |
|         | 1.804669023                                                                                           | 1.248025714 | 2.157186788 | 1           | 1.16162899  | 1.175030479 |   |
|         | 1.66957188                                                                                            | 1.717786151 | 1           | 1.305187826 | 1.439357377 | 1.67429067  |   |
|         | 1.293086073                                                                                           | 1           | 0.85710785  | 0.848253643 | 0.808566716 | 1.620895608 | 1 |
|         | 1.819025836                                                                                           | 2.657651389 | 1.901444797 | 1.261754705 | 1           | 0.760297335 |   |
|         | 0.742790759                                                                                           |             | 0.915545346 |             | 0.783580654 | 1.232847352 |   |
|         | 1.255714632                                                                                           | 1.319980179 | 2.507347903 | 1           | 0.891135531 | 1.120677142 |   |
|         | 1.446750577                                                                                           |             | 1.510451421 |             |             |             |   |



YBR169C "YBR169C::SSE2::HSP70 family member, highly homologous to Sselp" 1  
1.297814662 1.487483463 2.355001269 1.635021373 1 1.948645593  
2.346691002 1.504578056 1.627767079 1 1.533613363 2.209681467  
2.944128902 1.798374665 1 4.670515286 5.0226226 6.644617585  
2.360280939 1 1.16494939 1.628116268 1.257983406 1  
1.206815179 1.536686934 1.329588123 0.867763367 0.979058573 1  
1.636252892 1.078388196 2.294738524 1.474695549 1.156210196 1  
1.582368314 1.525080464 1.136723952 1.067505954 3.038209282 0.754787878  
YBR183W YBR183W::YPC1::Yeast Phyto-ceramidase 1 1.814714642  
1.878649498 1.800630097 1.578334458 1 1.884051457 1.966021175  
1.727288796 1.358003512 1 1.497289116 2.186022403 2.77137529 1  
3.689418383 2.563874347 3.696674527 2.481348322 1 2.776712298  
1.339607537 2.136156547 1.246510468 1 1.014848242 1.113169811  
0.978779314 0.85425171 0.90259981 0.816184533 0.753339115  
1.093545554 1.420664431 2.051814483 1 1.412123976 1.137505977  
1.262139151 1.884261626 3.426058009 1.23112736  
YBR185C YBR185C::MBA1::involved in assembly of mitochondrial respiratory  
complexes 1 1.840018913 1.850425775 1.901181548 2.327161498 1  
1.885814514 1.860858906 1.753068651 1 2.005690636 1.526728366  
1.753436696 1.407103193 1 1.685628092 1.258789439 0.997226061  
1.29644065 1 0.845842637 0.966125699 1.588635266  
1.528786073 0.970923312 1.042271671 1.028637446 1 1.257188107  
1.248989054 1.142968153 0.664064167 1.259821555 1.171500577  
1.241162017 0.699645665 1.391965466 1.502299775 1.627784988  
YHR153C YHR153C::SPO16::Early meiotic protein required for efficient spore  
formation 1 1.314131864 1.272816107 1.460220761 1.549733553 1  
1.226376194 1.189759596 1.60209376 1.624652521 1 0.93988747  
0.824575787 1.213106058 1.532891709 1 0.695704511 1.705619712  
1.513627565 0.631364165 1 0.581435961 0.508017756 0.239592551  
0.435790197 1 0.814968051 1.049430929 0.402039466 0.552297436  
1.048417344 1 0.941105349 1.372268005 1.384571168 1.608218457  
2.064683811 1 0.99153625 1.31876154 1.099944332 1.609504887  
1.336196454 1.520958878  
YHR155W YHR155W::YHR155W::molecular\_function unknown 1 1.642873024  
1.626797619 1.522013732 1.489048657 1 1.472842827 1.509895794  
1.551636819 1.469741825 1 1.815554621 1.615946045 1.333074587  
1.836640724 0.654642339  
1 0.931334651 0.73172197 0.86277296 0.832855447 0.888039853 1  
0.737034747 0.795055767 0.740617885 0.808300779 0.841285338 1  
0.763925934 0.688785705 0.944986467 1.007143047 0.723072449 1.793278037  
YHR157W "YHR157W::REC104::meiosis-specific recombination gene, dispensable  
for mitotic recombination and axial elements in meiosis, required for tripartite  
synaptonemal complexes, meiotic recombination and spore viability; classified as  
an early recombination gene" 1 1.078177341 1.049839243 1.5851784 1  
0.951335632 0.824050865 1.321471301 1 0.754653856 0.888626576  
1.265776375 1.135397678 1 0.984920182 0.952088855 1.810173163 1  
1.040949488 1.977617366 0.78179229 1 1.082549443 0.70403903  
1.042250338 1.33245397 1.037469863 1 0.872174108 0.723350742  
0.671643716 0.604652954 0.406893832 1 0.948828619 0.573361191  
0.845829821 0.743685035 0.432198706 0.608558674  
YHR159W YHR159W::YHR159W::molecular\_function unknown 1 0.727912684  
0.929507784 1.191833188 0.728506578 1 1.046752178 1.371314648  
0.90001847 1 1.276755264 1.295491217 0.963014658 1.28699017 1  
0.844019716 0.391481984 0.602693455 1.139528739 1 1.743931053  
2.203670544 1.393808891 0.884169833 1 0.931641527 0.568351905  
0.847075213 1.135193135 0.99753841 1 0.742301571 0.797815753

0.515892718 1.06668343 0.910214393 1 0.493984276 0.588267502  
 0.602453405 0.784234855 0.482905097 0.75216104  
 YHR161C "YHR161C::YAP1801::Yeast Assembly Polypeptide, member of AP180  
 protein family, binds Pan1p and clathrin" 1 1.116001344 1.08271707  
 1.241658059 0.966731314 1 1.327584264 1.464767055 1.115261688  
 0.961238664 1 1.580282458 1.669314767 1.359863499 1.373804162 1  
 1.86651412 1.658969882 1.558624075 1.05264392 1 1.853872497  
 1.52799579 1.434781847 1.502660158 1 1.279818034 1.187363683  
 1.517444881 1.506519802 1.137866843 1 1.375119589 1.696119229  
 1.432800229 1.026741162 0.840559597 1 1.37108142 1.456075409  
 1.158732474 1.286596893 0.785243438 0.922032049  
 YHR163W YHR163W::SOL3::weak multicopy suppressor of los1-1 1  
 1.380428088 1.171271543 0.882150843 1.103801651 1 0.951325344  
 0.941402668 1.170883105 1.118671052 1 1.007651999 1.058579478  
 1.231727331 0.974575652 1 1.648325384 1.394563086 2.324463024  
 2.215717237 1 1.162332726 1.654083196 2.223683998 1.886610687 1  
 0.92544319 0.744825665 0.912063272 1.164870847 0.848764772 1  
 0.798568821 0.554780608 0.496273746 0.939106327 0.435546786 1  
 0.542529085 0.548886264 0.860214293 0.624193223 0.402168731 0.726767905  
 YHR177W YHR177W::YHR177W::molecular\_function unknown 1 1.125003534  
 0.936772869 1.023645763 0.75848546 1 0.982820545 1.174960414  
 0.859257526 0.890684467 1 1.198343992 1.154356655 0.896949422  
 1.090510665 1 1.229222222 1.269327881 0.921934965 1  
 1.554318993 1.584092568 1.331521703 0.638283169 1 1.233935072  
 1.104197027 1.53448426 1.070478872 0.99463321 1 1.052719203  
 1.42540617 1.10220115 0.913027026 0.995331224 1 0.989223402  
 1.239116495 0.999261119 1.167832093 0.761904481 0.862489653  
 YHR179W "YHR179W::OYE2::NAPDH dehydrogenase (old yellow enzyme), isoform 2"  
 1 1.094244193 0.869480242 0.625587831 0.558005994 1 0.979506877  
 0.771288202 0.670542159 0.597751863 1 2.709751969 2.547704087  
 0.72951075 0.838311802 1 4.075381198 4.496951699 1.489873385  
 1.27659401 1 3.370881284 2.004919765 0.91897337 1.234443109 1  
 0.811921535 0.761220906 0.831134822 0.943079033 0.950168031 1  
 0.741742319 0.742780246 0.596673342 0.94438544 0.742635186 1  
 0.690469101 0.719066801 0.87736057 0.936701307 0.592960465 0.964937646  
 YHR181W YHR181W::YHR181W::molecular\_function unknown 1.29900772  
 1.068211311 0.837491368 1.105255951 0.915310347 0.978658332  
 1.136832814 1.020957425 1.293643081 0.924444672 1.083260666  
 0.848783447 0.806000053 0.572070904 0.465867296 0.554245493 1  
 1.509467247 1.612442833 1.127561738 1.068088108 0.984908215  
 1.828836776 1.530643876 0.868721307 1.128152107 1 1.36324417  
 2.129560979 3.281620605 1.98482515 1.636095297 1 1.151613889  
 1.252117452 0.876525369 0.837454953 2.646078503 1.01222136  
 YHR183W "YHR183W::GND1::6-phosphogluconate dehydrogenase, decarboxylating;  
 converts 6-phosphogluconate + NADP to ribulose-5-phosphate + NADPH + CO2" 1  
 1.302517628 0.813127853 0.863310975 0.497331983 1 0.899163745  
 1.006263543 0.752119561 0.663987792 1 1.023290404 0.819111612  
 0.590935422 0.706589719 1 1.588634739 1.22588706 2.640723566  
 1.844903416 1 1.334332789 0.995784882 1.578077721 2.591525111 1  
 1.308088917 0.86813098 0.8554427 1.333153979 1.100554406 1  
 0.844991304 0.657343251 0.438729667 0.514875876 1.123422555 1  
 0.780670352 0.743751144 0.614034425 1.12489323 0.530840554  
 YNL250W "YNL250W::RAD50::coiled-coil protein, contains a purine-binding  
 domain, two heptad repeats and a hydrophobic tail" 1 0.766790786  
 0.748893038 0.88778039 0.882595445 1 0.764077392 0.889563335  
 1.013856412 0.886131503 1 0.754467542 0.9327564 0.831313059  
 0.98941707 1 0.970872257 1.12232656 0.950048577 1

|             |                                                                                  |             |             |             |             |
|-------------|----------------------------------------------------------------------------------|-------------|-------------|-------------|-------------|
| 1.27005607  | 2.201733337                                                                      | 0.7016373   | 1           | 0.908787796 | 1.091594583 |
| 0.87626511  | 0.706490507                                                                      | 0.801593375 | 1           | 1.113567659 | 1.182171351 |
| 0.933950606 |                                                                                  | 1           | 1.411927979 | 1.638174836 | 1.401199847 |
| 1.051783889 | 1.084945864                                                                      | 1.316938451 |             |             |             |
| YNL252C     | YNL252C::MRPL17::mitochondrial ribosomal protein of the large subunit            |             |             |             |             |
| 1           | 0.929977274                                                                      | 1.235203685 | 1.052726115 | 1.556280977 | 1           |
| 0.967991761 | 1.129988506                                                                      | 1.602113341 | 1.352544682 | 1           | 0.872717106 |
| 0.962597197 | 1.298748211                                                                      | 1.089190997 | 1           | 0.945507153 | 0.720905813 |
| 1.157951207 | 1.437652793                                                                      | 1           | 1.501524283 | 2.679360199 | 1.259272257 |
| 1.007741908 | 1.026519085                                                                      | 0.665340631 | 0.675648103 | 0.839686394 | 1           |
| 1.179686368 | 1.21536238                                                                       | 0.993681691 |             | 1.828285834 | 1           |
| 1.070962909 | 0.99919668                                                                       | 1.168356042 | 1.435462105 | 1.167206744 |             |
| YNL254C     | YNL254C::YNL254C::molecular_function unknown                                     |             |             |             |             |
| 1           |                                                                                  |             |             | 1           | 0.689818868 |
| 0.635227745 | 0.984784764                                                                      | 1.066981583 | 1           | 0.850097565 | 0.909603996 |
| 1.115085244 | 1.411043462                                                                      | 1           | 0.697567424 | 0.675383261 | 0.557478509 |
| 1.278967006 | 1                                                                                | 0.652457622 | 0.442975542 | 0.511681367 | 0.547346732 |
| 1.173402768 | 1.092648097                                                                      | 1.055159064 | 1.006850904 | 1           | 0.834628918 |
| 0.893813647 | 0.97079509                                                                       | 0.905143419 | 0.953727523 | 1           | 0.781427776 |
| 0.520826423 | 0.654247895                                                                      | 1.442413966 | 0.864269958 | 1           | 0.629600829 |
| 0.559776653 | 1.055349703                                                                      | 0.256870608 | 0.732968273 | 0.625195524 |             |
| YNL256W     | YNL256W::FOL1::folic acid synthesis                                              |             |             |             |             |
| 1           |                                                                                  |             |             | 1           | 0.987908268 |
| 0.920675503 | 0.889244742                                                                      | 1           | 0.879985922 | 0.773606651 | 0.88028939  |
| 0.815986079 | 1                                                                                | 0.765980758 | 0.652036944 | 0.435276942 | 0.839503958 |
| 0.370078818 | 0.243969526                                                                      | 0.2384398   | 0.311295261 | 1           | 0.866118996 |
| 0.581018531 | 0.581959406                                                                      | 1.095415241 | 1           | 0.72611509  | 0.577169474 |
| 0.62970626  | 0.826190234                                                                      | 0.888380193 | 1           | 0.895212494 | 0.708137789 |
| 0.666370331 | 0.765730867                                                                      | 0.762581474 | 1           | 0.613394092 | 0.713630764 |
| 0.831294378 | 0.918406652                                                                      | 0.710022247 | 1.327446012 |             |             |
| YNL270C     | YNL270C::ALP1::Homologous to permeases Canlp and Lyp1p                           |             |             |             |             |
| 1           |                                                                                  |             |             |             | 1           |
| 1.561255193 | 1.135851935                                                                      | 1.400254188 | 0.927790273 | 1           | 1.323109329 |
| 1.603797118 | 1.418522022                                                                      | 1.823734791 | 1           | 1.780885767 | 1.660562926 |
| 1.348842638 | 1                                                                                | 1.127757106 | 1.574560206 | 0.890939781 | 1           |
| 1.331079794 | 1.468600173                                                                      | 0.687390882 | 1           | 1.10569069  | 1.552196203 |
| 2.231130347 | 0.970288691                                                                      | 0.927048643 | 1           | 1.029469315 | 1.221582817 |
| 2.052842135 | 1.351191099                                                                      | 1           | 1.010559241 | 1.150356763 |             |
| 0.994618407 | 0.960559531                                                                      |             |             |             |             |
| YNL272C     | YNL272C::SEC2::Protein with coiled-coil domain essential for vesicular transport |             |             |             |             |
| 1           | 0.94365866                                                                       | 1.117123127 | 1.254389542 | 1.061680537 | 1           |
| 1.110122636 | 1.185320439                                                                      | 1.047993824 | 0.962815304 | 1           | 1.133761906 |
| 1.04659922  | 0.775844723                                                                      | 1.264428833 | 1           | 1.496711663 | 0.736198389 |
| 0.780715456 | 1                                                                                | 1.376920338 | 1.118545639 | 0.702366595 | 1.275961924 |
| 1.086798533 | 1.119679507                                                                      | 1.103444997 | 0.951417167 | 1.168012979 | 1           |
| 1.479308693 | 1.283440979                                                                      | 1.443692306 | 1.257319218 | 1.080894266 | 1           |
| 0.982417066 | 1.231843219                                                                      | 1.013018203 | 0.909332745 | 1.393260489 | 0.95705708  |
| YBR187W     | YBR187W::YBR187W::molecular_function unknown                                     |             |             |             |             |
| 1           |                                                                                  |             |             | 1           | 1.972699622 |
| 1.299383373 | 1.149546083                                                                      | 1.320616006 | 1           | 1.381432181 | 1.127921617 |
| 1.055105521 | 1.244368195                                                                      | 1           | 1.273879316 | 0.808336559 | 1.054160607 |
| 0.962265892 | 1                                                                                | 0.671565086 | 0.21174575  | 0.259369538 | 0.588737985 |
| 0.938263959 | 0.515404156                                                                      | 0.2535407   | 0.523639146 | 1           | 1.038824034 |
| 0.616898468 | 0.638943265                                                                      | 1.385634957 | 1.140970179 | 1           | 0.843615888 |
| 0.437910094 | 0.43413771                                                                       | 0.455606715 | 0.8264368   | 1           | 0.758563316 |
| 0.473525366 | 0.539057417                                                                      | 1.248523455 | 0.540326777 | 1.071763756 |             |
| YNL274C     | YNL274C::YNL274C::not yet annotated                                              |             |             |             |             |
| 1           |                                                                                  |             |             | 1           | 0.817132799 |
| 1.410826036 | 1.291178996                                                                      | 1           | 1.088761296 | 1.476239498 | 2.105913626 |
| 1.530525313 | 1                                                                                | 0.914408124 | 1.592647423 | 3.797711085 | 1.273461603 |
| 2.901663601 | 4.69544622                                                                       | 9.413730677 | 7.79397884  | 1           | 2.612524712 |
| 3.924114276 | 11.19772651                                                                      | 6.969659503 | 1           | 1.038966573 | 2.048207026 |

|         |                                                                                |             |             |             |             |             |   |             |
|---------|--------------------------------------------------------------------------------|-------------|-------------|-------------|-------------|-------------|---|-------------|
|         | 2.277322628                                                                    | 0.906506506 | 1.140545682 | 1           | 1.059444828 | 2.011715339 |   |             |
|         | 3.319035854                                                                    | 1.571239852 | 1.460218617 | 1           | 1.27981808  | 2.318509869 |   |             |
|         | 1.732174168                                                                    | 0.928564137 | 3.821957099 | 2.3580555   |             |             |   |             |
| YBR189W | YBR189W::RPS9B::Homology to rat S9 and E. coli S4                              |             |             |             |             |             | 1 |             |
|         | 1.333294513                                                                    | 1.281610641 | 1.072405383 | 1.421002602 | 1           | 1.154957057 |   |             |
|         | 1.131325888                                                                    | 1.168296187 | 1.161187507 | 1           | 1.238684229 | 1.2994211   |   |             |
|         | 1.438613513                                                                    | 0.875840072 | 1           | 0.932973788 | 0.591899174 | 0.541801674 |   |             |
|         | 0.721832643                                                                    | 1           | 1.337825738 | 1.667559698 | 0.989878234 | 0.897258664 | 1 |             |
|         | 1.35120222                                                                     | 1.175857218 | 1.04772223  | 1.318508405 | 1.267229072 | 1           |   |             |
|         | 1.249497059                                                                    | 1.227152783 | 1.098360887 | 0.580264625 | 1.273658132 | 1           |   |             |
|         | 1.034944687                                                                    | 1.026997546 | 0.728937079 | 1.38740676  | 0.974600333 | 1.021853256 |   |             |
| YNL276C | YNL276C::YNL276C::molecular_function unknown                                   |             |             |             |             |             | 1 | 2.679287095 |
|         | 3.414692131                                                                    | 1.770045467 | 2.216057305 | 1           | 1.576360272 | 1.730263073 |   |             |
|         | 2.466403017                                                                    | 2.092373551 | 1           | 4.162103349 | 6.293943302 | 6.793871607 |   |             |
|         | 2.231246743                                                                    | 1           | 0.924484793 | 0.887372284 | 1.5796203   | 1           |   |             |
|         | 1.580182104                                                                    | 2.02925216  | 2.377355591 | 1.595916584 | 1           | 0.963995784 |   |             |
|         | 0.970768046                                                                    | 0.848863608 | 0.869437736 | 0.966288722 | 1           | 2.59857014  |   |             |
|         | 1.936893755                                                                    | 1.224855874 | 1.849851428 | 3.411188537 | 1           | 1.777241838 |   |             |
|         | 1.184293156                                                                    | 0.967058224 | 0.995478308 | 1.066848813 | 1.836183426 |             |   |             |
| YBR191W | YBR191W::RPL21A::Homology to rat L21                                           |             |             |             |             |             | 1 | 2.001280465 |
|         | 1.91996612                                                                     | 1.508091679 | 2.290894914 | 1           | 1.70385314  | 1.572361549 |   |             |
|         | 2.108085938                                                                    | 2.198984037 | 1           | 1.222000094 | 1.234383499 | 1.33307465  |   |             |
|         | 1.328311269                                                                    | 1           | 0.550231714 | 0.143163088 | 0.65094369  | 1           |   |             |
|         | 1.093478633                                                                    | 0.963169493 | 0.382581685 | 1           | 1.295606848 | 1.109217088 |   |             |
|         | 0.775001107                                                                    | 1.063628292 | 1.015824173 | 1           | 1.174824523 | 1.538498243 |   |             |
|         | 1.199482179                                                                    | 0.631006764 | 1.789000311 | 1           | 1.111904564 | 1.379772236 |   |             |
|         | 0.802957986                                                                    | 1.763051116 | 1.295933453 | 1.188221762 |             |             |   |             |
| YNL278W | YNL278W::CAF120::CCR4 Associated Factor 120 kDa                                |             |             |             |             |             | 1 | 1.219769123 |
|         | 0.924452087                                                                    | 1.163831071 | 0.786499614 | 1           | 1.113278484 | 1.18002764  |   |             |
|         | 0.938353186                                                                    | 0.856742356 | 1           | 1.093458251 | 0.792229244 | 0.72734186  |   |             |
|         | 1.105013555                                                                    | 1           | 0.65603266  | 0.620078134 | 0.780040383 | 0.541968701 | 1 |             |
|         | 0.698062341                                                                    | 0.877346421 | 0.474052156 | 0.774511756 | 1           | 0.940387904 |   |             |
|         | 0.803920999                                                                    | 0.910413233 | 0.977702236 | 0.980152388 | 1           | 0.895602763 |   |             |
|         | 0.599175694                                                                    | 0.677710852 | 0.927465048 | 0.557284995 | 1           | 0.802663139 |   |             |
|         | 0.529962692                                                                    | 0.848639325 | 0.510635815 | 0.86113684  | 0.718887286 |             |   |             |
| YNL280C | YNL280C::ERG24::sterol C-14 reductase                                          |             |             |             |             |             | 1 | 1.148863111 |
|         | 0.8591914                                                                      | 0.808134374 | 0.745945136 | 1           | 0.930622168 | 1.007437855 |   |             |
|         | 0.929977635                                                                    | 0.839660285 | 1           | 0.901550305 | 0.806831496 | 1.024022975 |   |             |
|         | 0.79988521                                                                     | 1           | 0.796768488 | 1.26315798  | 1.290892523 | 1           |   |             |
|         | 1.008391029                                                                    | 0.569047401 | 0.715426577 | 0.814903048 | 1           | 0.883918914 |   |             |
|         | 0.872977244                                                                    | 1.37990713  | 1.356520051 | 0.928819514 | 1           | 1.009334053 |   |             |
|         | 0.961778162                                                                    | 0.872823065 | 1.419264736 | 1.389256198 | 1           | 0.858719503 |   |             |
|         | 0.961369545                                                                    | 1.005819249 | 0.742586632 | 1.015723811 |             |             |   |             |
| YBR193C | YBR193C::MED8::Member of RNA Polymerase II transcriptional regulation mediator |             |             |             |             |             | 1 |             |
|         | 1.227065307                                                                    | 1.27783203  | 1.310706112 | 1.328260032 | 1           | 1.242552425 |   |             |
|         | 1.417744062                                                                    | 1.5212859   | 1.218588406 | 1           | 1.071582009 | 1.109278006 |   |             |
|         | 0.846974527                                                                    | 1           | 1.24127007  | 1.427121814 | 1.453255532 | 0.90447668  | 1 |             |
|         | 1.125313778                                                                    | 1.365560675 | 1.217847317 | 0.97391826  | 1.311400612 | 1           |   |             |
|         | 1.087319371                                                                    | 1.257227063 | 1.332301334 | 1.024969748 | 1.032288718 | 1           |   |             |
|         | 1.290029573                                                                    | 1.098426956 | 1.091410076 | 1.109775271 | 1.175087415 |             |   |             |
| YBR207W | YBR207W::FTH1::FTS3 Homolog                                                    |             |             |             |             |             | 1 | 1.550488336 |
|         | 1.381549984                                                                    | 1.873855473 | 1           | 1.580004912 | 1.362329906 | 1.3088503   |   |             |
|         | 1.458564276                                                                    | 1           | 2.140294911 | 1.717478099 | 1.283420001 | 1.36255092  | 1 |             |
|         | 1.24142811                                                                     | 1.089395565 | 0.835676588 | 0.984329117 | 1           | 1.324609516 |   |             |
|         | 1.118149464                                                                    | 0.908976178 | 0.792680724 | 1           | 1.97758121  | 2.119873126 |   |             |
|         | 1.89958286                                                                     | 1.076512015 | 1.097682113 | 1           | 2.436752506 | 2.129802713 |   |             |

2.933827003 1.134885278 0.766295112 1 2.491976188 2.21287808  
 1.010018248 1.065725913 1.220005518 1.015723811  
 YBR209W YBR209W::YBR209W::molecular\_function unknown 1 1.899239567  
 2.008199247 1.649056313 2.663521551 1 1.412091982 1.342272091  
 1.787959864 2.049274775 1 1.667701551 1.913604237 2.049028089  
 1.669849753 0.488625878 0.403525291 0.570230149 0.59137858 1  
 2.185870879 2.39152028 1.830807029 1 1.131114566 1.434463009  
 1.062675903 1.169938471 1.155819714 1 0.61518389 1.180628417  
 1.08894568 1.053947649 1 1.001170845 0.859898917  
 1.440005195 0.951741021 1.390490964  
 YBR211C YBR211C::AME1::associated with microtubules and essential 1  
 1.744299427 1.584999899 1.586003611 1.788311616 1 1.478747093  
 1.427326565 1.724138503 1.583695921 1 1.333403822 1.667405848  
 1.543423315 1.484207197 0.912101698 0.695035306 1.173130027  
 1 1.142967147 1.147817831 0.929127946  
 0.883387297 1.17804067 1 1.081147869 1.338212644 1.459833632  
 0.95456362 1.193377943 1 1.358301866 1.310277401 1.109430648  
 1.614342831 1.300221968 1.539347006  
 YBR213W YBR213W::MET8::Protein involved in the expression of PAPS reductase  
 and sulfite reductase 1 2.262252242 1 2.13201251  
 1 1.83102229 1.945572541 2.328487769  
 0.427249305 1 0.974435878  
 0.959628187 1.102679569 1.396511892 1.298066108 1 0.725996949  
 0.572284425 0.745024325 0.764527788 0.423661197 1 0.928366464  
 0.629956173 0.647918251 0.865796041 0.522747531  
 YBR215W YBR215W::HPC2::Protein required for normal cell-cycle regulation of  
 histone gene transcription 1 0.847350149 1.012956779 1.153123917  
 1.256166965 1 1.05650948 1.170862867 0.769929748 1.024685541 1  
 1.001850518 1.025775861 0.964096982 1.070773179 1  
 1.019994334 1 0.841618666 0.50186588 1.078500716 1  
 0.87188436 0.987316396 0.681144851 0.924699392 1 1.048090485  
 1.01811802 1.161472347 1.284380465 0.903028647 1 1.142303107  
 1.120903858 1.047853486 1.247579592 0.971942653  
 YBR217W YBR217W::APG12::autophagy 1 1.12186596 0.963499097  
 0.971024135 1.169716032 1 0.864285776 0.846635112 0.973943062 1  
 1.029835107 1.026104308 0.906674589 0.89099341 1 1.308427846  
 1.062834834 1.075903776 1.18646443 1 1.163378902 1.115732109  
 1.34004031 0.879545136 1 0.958940954 0.846821279 0.828991245  
 0.699030009 1.008228583 1 0.95271776 1.007740559 1.219329537  
 1.033284216 1.339322289 1 1.178721671 1.199153648 1.152101946  
 1.180572411 1.375187825 0.976320768  
 YHR185C YHR185C::PFS1::Prospore Formation at Selected spindle poles 1  
 1.736253581 1.49261613 2.431599746 1.511320868 1 1.782264198  
 1.860401655 1.501176893 1.363395789 1 1.865171314 1.874289972  
 1.112509773 1.827347063 1.290903059 2.004093477 1.421271804 1  
 0.363579291 0.635403389 0.452694981 1.037406226 0.890948163  
 0.544565688 1.08784069 1.128152107 1 1.276437919 0.985890402  
 1.241072223 0.948427449 0.807454477 1 0.840131767 0.863483564  
 0.681414055 0.815972204 0.57932334 2.527050792  
 YHR187W YHR187W::IKI1::RNA polymerase II Elongator associated protein 1  
 1.391277907 1.183430731 1.069287134 1.430686215 1 1.186490537  
 1.219431084 1.282769292 1.329939813 1 1.000703758 0.953062703  
 0.934583756 1.197628661 0.492764953 1.042476664  
 0.9632007 1 0.965253536 0.964314504 0.770735958  
 0.790707897 1.122007235 1 0.90075455 0.920739188 0.939096155  
 0.976276817 1.253525718 1 0.778690291 0.900018859 1.059636933  
 0.91437114

|         |                                                                                                |               |                                                 |
|---------|------------------------------------------------------------------------------------------------|---------------|-------------------------------------------------|
| YHR201C | YHR201C::PPX1::Cytosolic exopolyphosphatase                                                    | 1             | 0.910262468                                     |
|         | 1.254576198                                                                                    | 0.99612338    | 1.290921979 1 1.061002396 1.010449141           |
|         | 1.289069236                                                                                    | 1.256904623   | 1 0.961398259 1.096042458 1.094427834           |
|         | 1.132375148                                                                                    | 1 0.867789513 | 0.620101065 0.802345382 0.913234636 1           |
|         | 1.156289186                                                                                    | 1.441153369   | 1.173062822 1 1.023576762                       |
|         | 1.642264035                                                                                    | 1.163607068   | 1.104316674 1 1.176905062 0.829273818           |
|         | 0.840904991                                                                                    | 0.792014502   | 0.883342117 1 0.965260798 0.817357548           |
|         | 0.758169963                                                                                    | 0.986749951   | 0.561677903 1.615526305                         |
| YHR203C | YHR203C::RPS4B::Homology to rat S4 and human S4                                                | 1             | 1.25402629                                      |
|         | 1.023530334                                                                                    | 0.79749163    | 1.326142873 1 1.08453736 1.021153204            |
|         | 1.128726633                                                                                    | 0.94179634    | 1 0.904386739 0.77549397 0.634123375            |
|         | 0.855467481                                                                                    | 1 0.7004782   | 0.297162895 0.184390686 0.419200118 1           |
|         | 1.071062903                                                                                    | 0.446768298   | 0.833039153 1 0.990827174                       |
|         | 0.946119381                                                                                    | 0.911819485   | 1.039662127 1 1.140696695 0.938800584           |
|         | 0.973411149                                                                                    | 0.923769896   | 0.976227597 1 1.021468839 0.98357801            |
|         | 1.033118138                                                                                    | 1.088228163   | 0.925217513 1.006092019                         |
| YHR205W | "YHR205W::SCH9::protein kinase involved in growth control, may be redundant with cAMP pathway" | 1             | 0.707866891 0.721813889 0.884683905             |
|         | 0.555070621                                                                                    | 1 0.984037207 | 1.061641808 0.613193437 0.632180459 1           |
|         | 0.703094232                                                                                    | 0.590351796   | 0.825939488 1 0.542501845 0.677926819           |
|         | 0.515282676                                                                                    | 1 0.493432014 | 0.314559648 0.367499433 1                       |
|         | 1.176882044                                                                                    | 0.982100766   | 1.403796847 0.7951396 0.754132188 1             |
|         | 1.495572003                                                                                    | 1.404717895   | 1.251215069 1.437685783 0.888787415 1           |
|         | 1.049208206                                                                                    | 1.096783723   | 0.795648419 0.848476238 0.426239172 1.323943457 |
| YHR207C | YHR207C::SET5                                                                                  | 1             | 0.870831857 0.782939536 0.781468875             |
|         | 0.865659837                                                                                    | 1 0.825939544 | 0.753470914 0.920991799 0.81230016 1            |
|         | 0.853603144                                                                                    | 0.689417175   | 0.559266915 0.950460342 1 0.945549498           |
|         | 0.408331525                                                                                    | 0.497584089   | 0.989406536 1 1.613942488 1.397759638           |
|         | 0.977484286                                                                                    | 0.769457206   | 1 1.209897739 1.005586951 1.024697028           |
|         | 1.035721415                                                                                    | 1.241856066   | 1.078102606 1.168344934 0.600463852             |
|         | 0.68631576                                                                                     | 1.08460343    | 1 1.331473697 0.730612107 0.709924036           |
|         | 0.801201758                                                                                    | 0.454448851   |                                                 |
| YHR209W | YHR209W::YHR209W::molecular_function unknown                                                   | 1             | 1.025042539                                     |
|         | 0.910248171                                                                                    | 1.261746675   | 1 0.965930262 0.964405766 1.368598304 1         |
|         | 0.870382944                                                                                    | 1.255466087   | 1.982389436 1.137611514 1 1.43170271            |
|         | 0.584021677                                                                                    | 2.140674729   | 2.814848946 1 1.693501052 2.691384728           |
|         | 3.002975529                                                                                    | 1 1.046670189 | 1.017357019 1.380947118 1.745321952             |
|         | 1.231732226                                                                                    | 1 1.010881122 | 0.755070663 0.743853503 0.717037357             |
|         | 0.697209314                                                                                    | 1 0.750613714 | 0.715179843 0.705103821 0.840723185             |
|         | 0.45591006                                                                                     | 0.942171402   |                                                 |
| YHR211W | "YHR211W::FLO5::Flocculin, similar to flocculation protein Flo1p"                              | 1             |                                                 |
|         | 0.956995601                                                                                    | 0.743363838   | 1.103069621 0.696145912 1 1.138827741           |
|         | 1.125445182                                                                                    | 0.778289955   | 0.78756719 1 1.108708589 0.878872497            |
|         | 0.667320514                                                                                    | 0.866772716   | 1 1.21394767 1.071879322 1.215841972            |
|         | 0.682078679                                                                                    | 1 0.975293842 | 0.998432035 0.999958353 0.672583258 1           |
|         | 1.080651145                                                                                    | 1.21885026    | 1.320391377 1.326591376 1.027895673 1           |
|         | 1.150317898                                                                                    | 1.044273089   | 0.761542616 0.912069208 0.728757268 1           |
|         | 0.841082922                                                                                    | 0.880605343   | 1.03968953 0.93451755 0.748113875 0.938668951   |
| YIL006W | YIL006W::YIL006W::molecular_function unknown                                                   | 1             | 1.194970622                                     |
|         | 1.022305811                                                                                    | 1.127698364   | 0.964989752 1 0.978962383 1.327408707           |
|         | 0.83950706                                                                                     | 0.985684595   | 1 0.987944594 1.013875331                       |
|         |                                                                                                |               | 1 1.074603011                                   |
|         | 1.289969096                                                                                    | 1.33160841    | 0.954773784 1 0.933943874 0.639592182           |
|         | 0.782629188                                                                                    | 0.768792092   | 0.753091631 1 1.029021733 0.69383177            |
|         | 1.08004772                                                                                     | 0.518552962   | 1.009678287 0.671603625                         |
| YIL008W | YIL008W::URM1::ubiquitin-like protein                                                          | 1             | 0.741881289                                     |
|         | 1.127430951                                                                                    | 0.658547087   | 1.368421887 1 0.688445317 0.750113994           |

|             |                                                                                   |             |             |             |             |             |
|-------------|-----------------------------------------------------------------------------------|-------------|-------------|-------------|-------------|-------------|
| 1.033213235 | 1.067006177                                                                       | 1           | 0.87591262  | 0.895500179 | 0.832003872 |             |
| 0.853503023 | 0.752018554                                                                       |             | 0.405616566 | 0.654642339 | 1           |             |
| 1.649906023 | 1.768306246                                                                       | 0.878964928 | 1.043828964 | 1           | 0.700688571 |             |
| 0.895024797 | 0.377974577                                                                       | 0.571886946 | 0.805136025 | 1           | 1.111193021 |             |
| 1.449707954 | 1.6937646                                                                         | 3.15635312  | 1           |             | 0.948601236 |             |
| 1.089859215 | 2.123712189                                                                       | 1.173360493 | 1.147943055 |             |             |             |
| YNL294C     | YNL294C::RIM21::Regulator of IME2                                                 | 1           |             | 1.274472636 | 1.182970306 |             |
| 1.27998885  | 1.100159686                                                                       | 1           | 1.195008654 | 1.017801722 | 1.338798201 |             |
| 1.196984205 | 1                                                                                 | 1.23454727  | 1.248610389 | 0.924443208 | 1.451227066 | 1           |
| 1.047340034 | 0.818587768                                                                       | 0.882923664 | 0.844454758 | 1           | 1.424764912 |             |
| 1.285590163 | 1.59776984                                                                        | 1.215985548 | 1           | 1.092006832 | 1.170324065 |             |
| 1.247072307 | 1.263748882                                                                       | 1.079361958 | 1           | 0.982996993 | 0.911986689 |             |
| 0.982136542 | 0.913419535                                                                       | 0.933030162 | 1           | 1.104701036 | 0.824188863 |             |
| 1.046080306 | 0.825726467                                                                       | 1.120180267 | 1.594511286 |             |             |             |
| YNL296W     | YNL296W::KRE25::Killer toxin REsistant                                            | 1           |             | 1.147507629 |             |             |
| 1.659978709 | 0.792365179                                                                       | 1           | 1.944544368 | 1.250225846 |             | 1           |
| 1.49558314  |                                                                                   | 1.618899384 | 1           | 0.703786202 | 0.856392617 |             |
| 1.035978258 | 0.749604319                                                                       | 1           | 0.721905743 |             | 0.492899319 | 1           |
| 0.845276767 | 0.831402388                                                                       | 1.079898955 | 1.245649647 | 0.887507203 | 1           |             |
| 0.973025604 | 0.462007075                                                                       | 0.728571311 |             | 0.591930318 | 1           | 0.657433418 |
| 0.876033953 | 0.660786109                                                                       | 0.732897299 |             |             |             |             |
| YNL298W     | YNL298W::CLA4::Involved in localizing cell growth with respect to the septin ring | 1           | 0.819072268 | 0.819476329 | 0.990553377 | 0.662184336 |
| 0.954471783 | 1.149562666                                                                       | 0.843260941 | 0.781622408 | 1           | 0.996723996 |             |
| 0.809321397 | 0.671771721                                                                       | 0.737340848 | 1           | 0.667036466 |             | 0.816882317 |
| 0.554875791 | 1                                                                                 | 0.646138456 | 0.969744195 | 0.685223466 | 0.580428634 | 1           |
| 1.03605001  | 1.022371248                                                                       | 1.093097125 | 1.116691634 | 0.906969628 | 1           |             |
| 0.881014322 | 0.699578256                                                                       | 0.739109608 | 0.941013708 | 0.834154145 | 1           |             |
| 1.063167211 | 0.86530889                                                                        | 1.117489511 | 0.772375385 | 0.961748504 | 0.820459668 |             |
| YNL300W     | YNL300W::TOS6::molecular_function unknown                                         | 1           |             | 1.106478005 |             |             |
| 1.040175004 | 0.674073175                                                                       | 0.825389493 | 1           | 0.90526885  | 1.150917124 |             |
| 0.890706747 | 0.842597568                                                                       | 1           | 1.049958629 | 0.865176901 | 1.126136442 |             |
| 0.825406355 | 1                                                                                 | 0.665452061 | 0.570388984 | 0.662233713 | 0.89048857  | 1           |
| 0.783407805 | 0.908045718                                                                       | 0.688375222 | 0.662330214 | 1           | 0.890566656 |             |
| 0.714859264 | 0.614917356                                                                       | 0.907469013 | 0.729202864 | 1           | 0.862533596 |             |
| 0.842437364 | 0.60998503                                                                        | 0.568189404 | 0.920539729 | 1           | 0.792925307 |             |
| 0.994111345 | 0.839159515                                                                       | 1.121928282 | 1.084400358 | 1.126052476 |             |             |
| YNL302C     | YNL302C::RPS19B::Homology to rat S19                                              | 1           |             | 1.018282197 |             |             |
| 1.236280581 | 0.756362257                                                                       | 1.506009405 | 1           | 0.908813315 | 0.858037135 |             |
| 1.421027472 | 1.220696813                                                                       | 1           | 0.872103298 | 0.805498169 | 0.803218004 |             |
| 0.968779061 | 1                                                                                 | 0.722072893 | 0.318155568 | 0.244010594 | 0.320379749 | 1           |
| 1.6312273   | 0.982343796                                                                       | 0.65690088  | 0.838471229 | 1           | 0.904620447 |             |
| 0.933680237 | 0.749382246                                                                       | 0.903904253 | 0.934522639 | 1           | 1.163007591 |             |
| 1.473407589 | 0.874792503                                                                       | 0.750746684 | 1.706853154 | 1           | 1.046794302 |             |
| 1.131702149 | 0.865940813                                                                       | 1.455075455 | 0.900129041 | 1.188221762 |             |             |
| YNL304W     | YNL304W::YPT11::similar to Ypt1 and other Ras-like GTP-binding proteins           | 1           |             | 1.190783776 | 1           |             |
| 1.029977596 | 1.069061012                                                                       | 1.307972525 | 1.161041147 | 1           | 1.169592255 |             |
| 0.985505917 | 1.183464291                                                                       | 1.254470925 | 1           | 1.038321239 |             | 0.747620029 |
| 1.034378474 | 1                                                                                 | 1.782251351 |             | 2.528000684 | 1           | 1.035194684 |
| 1.121926705 | 0.822954713                                                                       | 0.701892786 | 0.992977291 | 1           | 1.351644779 |             |
| 1.744192592 | 1.337554491                                                                       | 0.853796778 | 1.53170201  | 1           | 1.09764457  |             |
| 1.516327158 | 1.089494499                                                                       | 1.111478141 | 1.610217311 | 0.857235872 |             |             |
| YNL318C     | YNL318C::HXT14::High-affinity hexose transporter                                  |             |             | 0.895784541 |             |             |
| 1.821794412 | 1                                                                                 |             |             | 1.873997467 |             | 0.251460079 |
| 0.222862468 | 1                                                                                 | 0.912796773 | 0.908065027 | 0.636780965 |             |             |

|          |                                                                                                                |             |             |             |             |             |
|----------|----------------------------------------------------------------------------------------------------------------|-------------|-------------|-------------|-------------|-------------|
|          | 0.932132043                                                                                                    | 1           |             |             |             | 0.755951    |
|          | 0.959966046                                                                                                    |             |             |             |             |             |
| YNL320W  | YNL320W::YNL320W::molecular_function unknown                                                                   |             |             | 1           |             | 2.012558334 |
|          | 1.503813562                                                                                                    | 1.543042402 | 1.62602748  | 1           | 1.338645569 | 1.334239016 |
|          | 1.41241365                                                                                                     | 1.519417756 | 1           | 1.671743341 | 1.333788322 | 1.579790294 |
|          | 1.295994651                                                                                                    |             | 0.979286965 | 0.91667191  |             |             |
|          | 1.036588998                                                                                                    |             | 1           | 0.920697184 | 0.758518208 | 1.365274076 |
|          | 1.321413455                                                                                                    | 1.276409818 | 1           | 0.931034452 | 0.792422897 | 0.822299528 |
|          | 0.732266867                                                                                                    | 1.145834719 | 1           | 0.877815243 | 0.801305313 | 0.81594169  |
|          | 1.262309527                                                                                                    | 0.901350367 | 2.415846671 |             |             |             |
| YNL322C  | YNL322C::KRE1::cell wall beta-glucan assembly                                                                  |             |             | 1           |             | 0.876173786 |
|          | 0.703467601                                                                                                    | 0.390704483 | 0.485596208 | 1           | 0.728243326 | 0.652393824 |
|          | 0.531309986                                                                                                    | 0.450174117 | 1           | 1.078685025 | 0.901601703 | 1.128134353 |
|          | 0.411290248                                                                                                    | 1           | 0.894413112 | 0.734032257 | 1.026924205 | 0.844110456 |
|          | 0.658234432                                                                                                    | 0.810103187 | 0.786437136 | 0.953869363 | 1           | 1.011895976 |
|          | 0.888056946                                                                                                    | 0.896562556 | 0.935483612 | 0.798035957 | 1           | 0.613565234 |
|          | 0.908443256                                                                                                    | 0.934296099 | 0.86288077  | 0.896767272 | 1           | 0.775886824 |
|          | 0.954365788                                                                                                    | 0.957744792 | 0.776077611 | 1.171316069 | 1.288042866 |             |
| YNL324W  | YNL324W::YNL324W::molecular_function unknown                                                                   |             |             | 1           |             | 1.19194464  |
|          | 1.172311014                                                                                                    | 1.298902524 | 1.009832288 | 1           | 1.401446073 | 1.051347467 |
|          | 0.950373082                                                                                                    | 1           | 1.20792632  | 1.206323843 | 0.705935506 | 1.572263282 |
|          |                                                                                                                | 0.482505085 | 0.701085636 |             | 0.325966761 | 0.722079051 |
|          | 0.428330789                                                                                                    | 1           |             | 0.910242888 |             | 1.132422503 |
|          | 1.037413177                                                                                                    | 0.71185984  |             | 1.3211488   | 1           | 0.596535987 |
|          | 1.151156316                                                                                                    |             |             |             |             |             |
| YIL010W  | YIL010W::DOT5::Derepression Of Telomeric silencing<br> homologous to<br>4 other S.c. thioredoxin peroxidases   |             |             | 1           |             | 0.977730829 |
|          | 1.026791531                                                                                                    | 1.211365147 | 1           | 0.984998231 | 1.118335498 | 1.447995615 |
|          | 1.361129275                                                                                                    | 1           | 1.036649308 | 1.379657735 | 2.187456925 | 1.290082525 |
|          | 1.262655223                                                                                                    | 1.600097567 | 1.845085542 | 1.798078501 | 1           | 1.526154465 |
|          | 1.868735731                                                                                                    | 2.713090594 | 1.451411241 | 1           | 1.168447412 | 1.491649578 |
|          | 1.71955808                                                                                                     | 1.132967468 | 1.195970715 | 1           | 0.972967816 | 1.458452898 |
|          | 1.325442605                                                                                                    | 1.34186182  | 1.281260701 | 1           | 0.941762339 | 1.297320344 |
|          | 1.187995615                                                                                                    | 0.887138152 | 1.564804819 | 1.422013335 |             |             |
| YIL012W  | YIL012W::YIL012W::molecular_function unknown                                                                   |             |             |             |             |             |
|          | 0.930999495                                                                                                    |             |             | 1.11388436  |             | 0.87287754  |
|          | 1.335670946                                                                                                    |             |             |             |             |             |
|          | 0.320704516                                                                                                    |             |             |             | 1           | 0.681114533 |
|          | 0.900412302                                                                                                    | 1.36234895  |             | 1           | 1.139240891 |             |
|          | 0.796426316                                                                                                    |             |             |             |             |             |
| YER056CA | YER056CA::RPL34A::Homology to rat L34                                                                          |             |             | 1           |             | 0.909180845 |
|          | 1.448142041                                                                                                    | 0.870972169 | 2.047128026 | 1           | 0.998126559 | 1.052602742 |
|          | 1.479754602                                                                                                    | 1.494887146 | 1           | 0.900605998 | 0.910969822 | 0.806874604 |
|          | 1.084927849                                                                                                    | 1           | 1.031156991 | 0.434059258 | 0.213746845 | 0.649621077 |
|          | 1.179202926                                                                                                    | 0.85754206  | 0.514047429 | 0.731761621 | 1           | 0.942040565 |
|          | 0.895184909                                                                                                    | 0.655374374 | 0.834584069 | 1.080914896 | 1           | 1.472930338 |
|          | 1.813356505                                                                                                    | 1.286518065 | 1.093346291 | 1.723277736 | 1           | 1.103084339 |
|          | 1.162873482                                                                                                    | 0.909927635 | 1.710241832 | 1.022197573 | 1.738989213 |             |
| YIL014W  | YIL014W::MNT3::MaNnosylTransferase; involved in adding the 4th and<br>5th mannose residues of O-linked glycans |             |             | 1           |             | 0.833814082 |
|          | 0.945430634                                                                                                    | 0.697996034 | 1           | 0.934252369 | 0.882701809 | 0.86799246  |
|          | 0.65595401                                                                                                     | 1           | 0.818277536 | 0.829073529 | 0.599068477 | 0.922477281 |
|          | 0.707778647                                                                                                    | 0.399654972 | 0.707010246 | 0.745927765 | 1           | 0.961021942 |
|          | 0.739364204                                                                                                    | 1.149727369 | 0.901761258 | 1           | 0.817452229 | 0.809002069 |
|          | 0.77122256                                                                                                     | 1.112134865 | 1.090732857 | 1           | 0.841572504 | 0.601666821 |
|          | 0.634618358                                                                                                    | 0.675381423 | 0.832932749 | 1           | 0.891262749 | 0.53834678  |
|          | 0.910625962                                                                                                    | 0.855986813 | 1.014191205 | 0.745156034 |             |             |



YIL074C      YIL074C::SER33::catalyzes the first step in serine biosynthesis;  
isozyme of SER3           1.257144061 1.153622647 1.02981247 0.91239909  
1.059387      1.051151593 0.844012292 0.90324992           1.281586772  
1.771675925 1.016652426 0.693124216 1      2.311095169 1.504308694  
1.133415302 1.196563059 1      1.515621955 1.612267303 1.13138052  
1.010243641 1      1.086514858 1.09087416 0.817493112 0.767504766  
0.86902944 1      1.429858581 1.618971945 1.142462751 0.920548268  
2.194901272 1      1.35904027 1.37572254 0.874611662 1.233471362  
2.095689337 1.357217158  
YIL016W      YIL016W::SNL1::Suppressor of nup116-C lethal. Snl1p is the first Bag  
domain protein identified in *S. cerevisiae*.      1      1.138747729 1.616356663  
1.08350513 2.322772671 1      1.131811175 1.059657721 1.72953096  
1.723271805 1      1.006783157 1.18019775 1.155676441 1.268134231 1  
0.898765005 0.598790478 0.488845488 1.000514936 1      1.897794868  
1.489824996 1.138772307 0.953972802 1      1.026486468 1.14993434  
0.629961415 0.770032551 0.979221606 1      1.196624217 1.501701109  
1.163593204 1.039749795 2.05169381 1      1.009121959 1.258925113  
0.913257252 1.808402023 0.97505575 1.248639823  
YML067C      YML067C::ERV41::ER vesicle protein 1      0.962858409 0.885241058  
0.907732416 1.297507064 1      0.920826727 0.888616345 1.033655849  
1.035890975 1      0.837167233 0.884307104 0.948664341 0.936195096 1  
1.022433372 0.653511275 0.692520864 1.213910108 1      1.304103827  
1.497821845 1.597525121 1.141596663 1      1.089045921 1.232490086  
1.155113338 1.109584235 1.013715368 1      1.118385042 1.345514415  
1.300495296 0.95674074 1.073903761 1      1.082027414 1.244679024  
1.059688255 1.204095126 1.165963243  
YIL030C      YIL030C::SSM4::Protein involved in mRNA turnover      1  
0.753920601 0.60651033 0.833822494 0.508104779 1      0.844422805  
0.944776266      0.454254783 1      0.945486751 0.734836998 0.240829249  
0.610056773 1      0.940802553 0.806417917      0.551182067 1  
0.593230244 0.537021097 0.30024679 0.636076216 1      1.181253088  
0.991058575 1.3103826      1.421574057 0.848441282 1      0.840963153  
0.777444228 0.803858018 0.719219069 0.459337934 1      0.850214643  
0.742584905 0.97849913      0.673789573 0.522071102  
YMR324C      YMR324C::YMR324C::molecular\_function unknown      1      1.24290613  
1.232819888 1.285897709 1.299258394 1      1.348113197      1.125125159  
1.252460084 1      1.522108807 1.455816907 1.383311337 1.513997302 1  
0.628490076 0.597689188 0.570126865 0.668152539 1      1.685602562  
0.571331179 1      1.263297019 1.473633452 1.389635827 1.235885498 1  
0.838210107 0.918813361 1.077297695 0.888353021 0.764103595 1  
1.130061298 1.128879943      0.858290586 1.223755004 1.01222136  
YIL032C      YIL032C::YIL032C::molecular\_function unknown      1      1.599680903  
1.575933063 1.326505194 1.394776891 1      1.607128626 1.377430203  
1.727013529 1.541570721 1      1.416687964      1.544568808 1.400329462 1  
0.79524886 0.686020012 1.085445921 0.752738889 1      0.747970424  
0.664495126 0.671219526      0.807250499      1.020982454 1  
0.78735282 0.913049281 0.89349934 0.840961773 1.325013161 1  
0.904869768      1.164080353 0.844101524  
YIL034C      YIL034C::CAP2::capping - addition of actin subunits      1  
0.820307827 0.916554104 0.897916884 1.002387644 1      1.029647045  
1.220916132 0.816375264 0.970612333 1      0.98757828 1.222062176  
1.571673582 0.817684906 1      2.000864363 2.128022139 2.584899304  
1.164734677 1      0.897309436 0.726659536 0.902567162 0.797615445 1  
1.181499195 1.207454286 1.302832531 1.088053355 0.933549967 1  
1.225104738 1.157370092 1.071677539 0.903426815 0.822783101 1  
0.939230542 1.006925884 1.002989676 0.897864293 1.201166081 0.975445103

YIL036W YIL036W::CST6::Chromosome STability; contains an ATF/CREB-like bZIP domain; transcriptional activator; interacts with the STB locus on 2-micron plasmid 1 0.711665391 0.877932658 0.824086507 0.779200769 1  
0.929459797 1.009905345 0.668486833 0.60411672 1 1.090997905  
1.151820873 0.642397544 0.764201361 1 1.965427321 1.841938419  
1.351550215 1.064760804 1 1.270996582 0.967063679 0.781741802  
0.986856264 1 1.218321577 1.408681639 1.133168084 0.904452599  
1.013016937 1 1.258651011 1.149967062 1.085754886 0.895984013  
1.002967784 1 1.299499864 1.201693461 1.030127249 1.080890467  
1.130627776 0.970191427  
YIL038C YIL038C::NOT3::General negative regulator of transcription; may inhibit RNA polymerase II transcription machinery 1 0.789360882  
0.811375714 0.925289026 0.606570135 1 0.996867831 1.052049099  
0.629952784 0.583075475 1 0.813021762 0.837163223 0.516711944  
0.779601071 1 0.595270948 0.419996366 0.664449673 0.521488452 1  
0.578576652 0.571619372 0.519725861 0.502106095 1 0.697097688  
0.569426289 0.577422981 0.797934885 0.855856016 1 0.71898564  
0.449773411 0.488564647 0.594198602 0.645390671 1 0.750270118  
0.527737444 0.884236739 0.831430822 0.831999785 0.529752537  
YIL040W YIL040W::YIL040W::molecular\_function unknown 1 1.431039855  
1.451471443 0.955256447 2.064325577 1 1.04657405 0.928669161  
1.392794777 1.449415664 1 1.182139132 1.022424015 1.526252488  
1.038978645 1 0.887548034 0.63410175 0.653087212 1.118859332 1  
0.905654929 1.287629074 1.195164228 1.027095942 1 0.946253442  
0.905885516 0.733712116 0.854481102 0.839142431 1 0.740300861  
1.143983173 0.930152422 0.772008322 1.179166913 1 1.012982089  
1.177512426 0.995441422 1.4926179 1.052209348 1.228500469  
YNL326C YNL326C::YNL326C::molecular\_function unknown 1 1.137447365  
0.94394088 1.128945091 0.783129067 1 0.876597525 0.773413938  
1.14974541 0.9631635 1 0.896882907 0.818397682 1.017186696  
1.010566829 1 0.887123878 0.813950966 1.106509884 1  
1.078307165 1.617645067 1.699218871 1 0.828242099 0.864733222  
0.843750551 0.979738951 0.888609945 1 0.678717223 0.774447622  
0.746247565 0.71652938 0.972192633 1 1.062980309 0.763891728  
1.203931041 0.941718339 1.291466287 1.824800513  
YNL328C "YNL328C::MDJ2::Protein of the mitochondrial inner membrane with similarity to E. coli DnaJ and other DnaJ-like proteins, function partially overlaps that of Mdj1p" 1 0.84791856 0.772907384 1.104934466 0.7735319 1  
1.209675952 1.342272091 0.811325412 1 1.078606972 1.278893985  
1.425315231 1 0.949167671 0.673596286 1 0.611732149  
1.52136627 0.320193198 1 0.873539996 0.914760956 1.02867029  
0.887745508 0.865805016 1 1.029257814 1.002572123 1.044313204  
1.222514028 1 1.076421637  
YNR003C YNR003C::RPC34::34-kDa subunit of RNA polymerase III (C) 1  
1.008646552 1.032470033 1.194127958 0.800933529 1 1.004407355  
0.929499043 1.284531434 1 0.968806529 0.675994018 0.627636087  
1.368544186 1 0.369114486 0.423132067 0.285066452 0.598589095 1  
0.827309879 0.734683011 0.800058537 1.151561804 1 0.810975413  
0.789365204 1.047326082 1.198903056 1 0.898133365  
1.638927092 0.843595839 1 0.383602698 0.327421873  
0.875624  
YNR005C YNR005C::YNR005C::molecular\_function unknown  
1.054544078 1.153789845 1.381378396  
0.780602068 1.249189986 1 0.611293334 0.689174933 0.560702577 1  
1.210611979 0.838283957 0.571851119 1  
0.945371088 0.930109891 1 1.290680966 0.715591794 1.235248211  
1.16468583 1.024669649

YNR007C YNR007C::AUT1::Protein involved in autophagocytosis during  
starvation 1 0.841339851 1.158872533 1.112280387 1 1.042266941  
1.166875796 1.448576558 1.234717225 1 1.190615573 1.285104326  
1.405795461 1.289060658 1 1.584994779 0.668126734 1.558134765  
1.874151175 1 5.325312482 6.524139393 7.216657054 2.374390458 1  
1.196546165 1.815065538 1.318321195 1.137567899 1.258848218 1  
1.27910392 1.211698658 1.214052328 1.21560269 1.489015706 1  
1.514339436 1.272814335 1.193998091 1.141796506 1.274908518  
YNR009W YNR009W::YNR009W::molecular\_function unknown 1 1.123876259  
0.985230682 0.893437037 1.394120072 1 0.827361909 0.869103349  
1.043248932 1.254994341 1 0.830911179 0.652885178 0.914413725  
1.112463934 1 0.737971008 0.5473442 0.756184126 0.681317853 1  
0.872447222 1.043814761 0.505308362 0.653501198 1 1.10435213  
0.91899466 0.799020771 0.977320408 0.902760646 1 0.726179092  
0.89621355 0.936849666 1.099085795 1.093944253 1 0.807343458  
0.828728311 1.06343006 0.98733365 1.234331528 1.179465531  
YNR011C YNR011C::PRP2::Dead-box protein required for the first catalytic  
event of pre-mRNA splicing. 0.994879931 1.152483776 1.244496537  
1.01127497 1.133241395 1.31366485 1.162007426 1.08414775  
1.100742001 1.016466064 0.725679477 1.263874807 1 0.680998801  
0.37192785 0.709924265 0.738754751 1 1.575753668 2.103791316  
1.247320231 1.61352131 1 0.952937588 0.929276018 1.00154282  
0.972354729 1 1.13206085 0.858736177 0.941003413 1.219528198  
0.95776841 1 0.779402491 0.793465274 1.037159427 0.807740857  
0.934730508 0.920280823  
YNR013C YNR013C::PHO91::Low-affinity phosphate transporter 1  
0.79357128 0.599785279 0.648785827 0.530744542 1 0.835800788  
0.956303982 0.525148067 0.494030141 1 1.164478586 0.801931259  
0.49931648 0.558137929 1 0.656054194 0.579226853 0.961478143  
0.426787015 1 0.409030834 0.424612766 0.391897126 1  
1.037132903 0.822113997 0.907934009 1.199914854 0.778073181 1  
0.758331335 0.557336587 0.568185493 0.740565879 0.412622852 1  
0.761779291 0.59912093 0.699645558 0.583611779 0.536534281 0.680359857  
YNR027W YNR027W::BUD17 1 0.835433499 0.84841132 0.881379215  
0.65717667 1 0.870947754 0.959067332 0.832136465 0.920087916 1  
0.901084674 0.773587486 0.758241318 0.814821638 1 0.785770867  
0.474993152 1.043844391 0.766861109 1 1.064479386 1.199020669  
0.929120608 0.424401522 1 0.862542258 0.898880095 1.136053888  
1.061696732 1 0.98681558 0.770017984 0.788537409 0.898959097  
0.747759372 1 0.915281442 0.661882988 0.981364705 0.690312691  
0.833776127 0.844101524  
YNR029C YNR029C::YNR029C::molecular\_function unknown 1 0.756814335  
0.907912636 0.90659246 1.215841032 1 0.805462897 0.867732741  
1.165875809 1 0.846753361 0.800232319 0.865084019 1.037999046 1  
0.54426751 0.450932186 0.810059286 1.048400453 1 1.186492599  
2.148645523 1.781370383 1.113891564 1 0.984751301 1.049022172  
0.808434779 0.740354917 0.989778937 1 1.041243766 1.392666374  
1.008524458 1.153472209 1.343398526 1 1.052406823  
0.889093608 1.046370726  
YIL054W YIL054W::FYV2::Function required for Yeast Viability on toxin  
exposure 1 1.613200249 1 1.371846964 1.650181633  
1.423457833 1.726290238 1 0.981548636 1.185157475 1  
1.031100484 0.766549267 1 0.791179253  
0.771125323 0.749808483 0.812302124 0.944346548 0.774109463 1  
0.705183009 0.541007504 0.538326378 0.646103026 0.710257421  
0.602034893

YMR143W YMR143W::RPS16A::Homology to rat S16 1.045362635  
1.064794833 0.628398026 1.30986058 0.805134146 0.69747256  
0.991220815 0.79210023 0.691746901 0.791119166 0.73913669 1  
0.890620015 0.429188267 0.280628298 0.531352392 1 1.427849643  
0.764357268 0.520084267 0.795143065 1 1.244387789 1.047503532  
0.680830332 1.003627169 1.34424802 1 1.14725186 0.900204332  
0.71864108 0.531790903 1.530342877 1 1.089835281 1.471863702  
0.832494993 1.56479944 0.916095906 1.207485451  
YIL056W YIL056W::YIL056W::molecular\_function unknown 1 1.310519943  
1.09560282 1.192668728 0.976701836 1 1.317861988 1.30667354  
0.928993172 0.874424185 1 1.845832766 1.18778381 1.128251378  
0.87882461 1 1.814356076  
1 1.215975014 0.943106554 0.971026066 1.315431933 1.0013578 1  
0.687749682 0.670065357 0.84013238 0.713884438 0.724220458 1  
0.865894631 0.640377425 0.98596679 0.829972463 0.907146476  
YMR173WA YMR173WA::YMR173W-A::molecular\_function unknown 1  
1.199609322 1.677520859 1.47067096 1 1.456516728 1.382720314  
1.786930276 1.819323059 1 2.41731037 3.659065287 3.473690383  
2.062496959 1 2.436039281 3.059215028 2.879494103 2.242309623 1  
3.587012618 2.569479505 3.900465363 4.101079035 1 2.188282583  
3.211635024 4.698492378 1.44284407 1.060153393 1 3.578146502  
8.687306396 9.052638465 6.671017956 2.517799398 1 6.08893935  
10.78465134 9.300159034 2.779328834 2.666210327 2.566453939  
YIL058W YIL058W::YIL058W::molecular\_function unknown 1 1.165379619  
1.050817105 1.071585811 1 1.141813812 1.10044864 0.851021109  
1.125067581 1 1.175180797 1.254664595 1.074302197 1.004078716 1  
0.901512073 1.155664554 1.228928624 1 0.743029118 1.177956131  
0.745113324 0.385666483 1 0.669906377 0.907814114  
0.850911397 1 0.819059808 1.01200139 1.09452753 1.175481024  
1.231616559 1 1.081587875 0.908899604 0.630783388  
0.983325775  
YFL015C YFL015C::YFL015C::molecular\_function unknown 1 1.206784739  
1.498164173 1.418489807 1.477070766 1 1.189977547 1.256956115  
1.653445655 1.380276596 1 1.566683853 1.398718527  
0.567736773 1.464308003 0.767416881 0.564621012 0.587064948  
0.723290577 0.425069397 1 0.837340898 0.852690219 0.793953529  
0.819689575 0.948843516 1 1.044818661 0.775742076 0.919967062  
1.419771753 1 0.683771399 0.601254456 0.739204145 0.612828797  
0.9762846 1.045495061  
YMR117C YMR117C::SPC24::Spindle Pole Component of molecular weight 24kDa 1  
1.025661321 1.013594302 1.102962453 0.976266061 1 1.082359994  
1.152601317 1.024796653 1 1.035119035 0.92060647 0.472341772  
1.420139841 1 0.693415996 1 0.802367571  
0.845171794 1 0.91778648 0.853143042 0.831339321 0.872048627  
1.108686116 1 0.984127113 0.741035906 0.901798324 1.462750502  
0.875132692 1 0.534131398 0.866666144 0.513580249 0.548897683  
1.37035161  
YIL060W YIL060W::YIL060W::molecular\_function unknown 1 1.116336202  
1.521658163 1.421625477 1.618593795 1 1.113697947 0.966805801  
1.342783123 1 1.123351007 1.311245284 2.239406159 1.243405594 1  
1.468583897 1.216739443 1.136839488 1.674073179 1 1.000940477  
1.63723353 0.992752131 1 0.70068004 0.770063402 0.524728936  
0.485212537 0.855704342 1 1.048365812 1.608673912 1.754972772  
1.65479778 2.11905506 1 1.381419205 2.036528972 1.524444069  
2.135213909 1.485598911 2.094492573  
YFL017C YFL017C::GNA1::involved in UDP-N-acetylglucosamine biosynthesis 1  
1.062831221 1.652492045 0.975579544 1.86193828 1 1.038643739

|             |                                                                                                                                   |             |             |             |             |
|-------------|-----------------------------------------------------------------------------------------------------------------------------------|-------------|-------------|-------------|-------------|
| 1.152632116 | 1.852133803                                                                                                                       | 1.562244783 | 1           | 0.995787524 | 1.215468079 |
| 1.701875147 | 1.328122993                                                                                                                       | 1           | 1.278332882 | 0.91409364  | 0.916628066 |
| 1.65315137  | 1                                                                                                                                 | 1.67505046  | 2.387457294 | 1.975814719 | 1.266048645 |
| 0.896996513 | 0.921894673                                                                                                                       | 0.687802623 | 0.709586737 | 0.870707067 | 1           |
| 1.187491336 | 1.525007522                                                                                                                       | 1.096822236 | 1.209419489 | 2.828330677 | 1           |
| 0.951948284 | 0.966681463                                                                                                                       | 1.07092737  | 1.487461871 | 1.445833146 | 1.301177213 |
| YMR175W     | YMR175W::SIP18::Salt-Induced Protein                                                                                              |             |             |             | 0.344760361 |
| 0.509051642 | 0.594853678                                                                                                                       | 0.907504249 |             | 0.376536395 | 0.448139848 |
| 2.442120192 |                                                                                                                                   | 0.399064192 | 0.564820856 | 3.30587321  | 2.069582826 |
| 1.888978551 |                                                                                                                                   | 2.967360318 | 6.515894007 | 1           | 1.187830086 |
| 2.245255598 |                                                                                                                                   | 0.78404628  | 1.048336793 |             | 0.946285691 |
| 1.208004676 | 1.358355328                                                                                                                       | 1.604323166 | 1.843861678 |             | 2.658603951 |
| 0.810178995 | 1.376799428                                                                                                                       | 1.024527582 | 0.773508533 | 1.175155734 | 1.581376939 |
| YIL062C     | YIL062C::ARC15::Arp complex subunit                                                                                               |             |             |             | 1           |
| 1.060068227 | 1.748414749                                                                                                                       | 1           | 1.151217373 | 1.205187242 | 1.812194128 |
| 1.482156571 | 1                                                                                                                                 | 0.974920345 | 1.543983209 | 2.069108889 | 1.240703683 |
| 1.322027769 | 1.193592738                                                                                                                       | 1.133021618 | 2.163394088 | 1           | 2.213223912 |
| 2.385496333 | 2.882421359                                                                                                                       | 1.956903102 | 1           | 1.243252901 | 1.60295334  |
| 1.374755326 | 1.013330232                                                                                                                       | 1.077003457 | 1           | 1.268990659 | 2.047092276 |
| 1.804772511 | 1.17174838                                                                                                                        | 1.465700849 | 1           | 1.172625227 | 1.562927373 |
| 1.170713342 | 1.328000789                                                                                                                       | 1.274587832 | 1.437774573 |             |             |
| YFL019C     | YFL019C::YFL019C::molecular_function                                                                                              |             |             |             | unknown     |
| 1.159018248 | 1.239909048                                                                                                                       | 1.123473436 | 1           | 1.00239398  | 1.09180435  |
| 1.384883148 | 1.148054906                                                                                                                       | 1           | 1.064418794 | 1.151766128 | 1.320626947 |
| 1.187067438 | 1                                                                                                                                 | 1.339229328 |             | 1.537410342 | 1           |
|             | 0.707935827                                                                                                                       |             | 0.603727051 |             | 0.865812621 |
|             | 1.075795936                                                                                                                       |             | 1           | 1.96935985  | 0.763583835 |
| 2.39563824  | 1.171617156                                                                                                                       |             |             |             |             |
| YFL019C     | YFL019C::YFL019C::molecular_function                                                                                              |             |             |             | unknown     |
|             |                                                                                                                                   |             |             | 1           | 0.950752508 |
| 0.973484846 | 1.035589343                                                                                                                       | 1.022504249 | 0.946607558 | 1           | 1.276835627 |
| 1.211547689 | 1.015780848                                                                                                                       | 1.28804979  |             | 0.982878751 | 1.221189297 |
| 0.970745315 | 0.704460911                                                                                                                       | 0.931731763 | 0.904519585 |             |             |
| YPR084W     | YPR084W::YPR084W::molecular_function                                                                                              |             |             |             | unknown     |
| 0.836576624 | 0.959653841                                                                                                                       | 0.872857061 | 1           | 0.898266241 | 1.000771859 |
| 0.875243699 | 0.865839213                                                                                                                       | 1           | 0.909197321 | 0.918976432 | 0.966802657 |
| 0.951720424 | 1                                                                                                                                 | 0.532759846 | 0.414745122 | 0.723577495 | 0.882564711 |
| 0.659509873 | 1.346406236                                                                                                                       | 1.168830503 | 0.825225204 | 1           | 0.8709391   |
| 0.937804533 | 0.953349341                                                                                                                       | 1           | 1.021801905 | 1.096380384 | 1.175518571 |
| 0.948724476 | 0.84842139                                                                                                                        | 1           | 1.016532852 | 0.936283916 | 1.045763772 |
| 0.558019028 | 0.98660969                                                                                                                        | 0.821335332 |             |             |             |
| YIL064W     | YIL064W::YIL064W::molecular_function                                                                                              |             |             |             | unknown     |
| 0.927228012 | 0.704158081                                                                                                                       | 1.255377382 | 1           | 0.861358808 | 0.627074645 |
| 1.024104998 | 1.167703592                                                                                                                       | 1           | 0.794197513 | 0.53232469  | 0.473158515 |
| 1.000882966 | 1                                                                                                                                 | 0.711353704 | 0.338769899 | 0.279031965 | 0.623138043 |
| 0.894835816 | 0.459103758                                                                                                                       | 0.185634744 | 0.417812238 | 1           | 1.122128725 |
| 0.988382932 | 0.755133028                                                                                                                       | 1.131868082 | 1.017290861 | 1           | 1.083246304 |
| 1.058941882 | 0.928630831                                                                                                                       | 0.895626969 |             | 1           | 1.044461701 |
| 0.935592797 | 1.954113512                                                                                                                       | 0.675089272 | 1.081395653 |             |             |
| YFL021W     | YFL021W::GAT1::activator of transcription of nitrogen-regulated genes; inactivated by increases in intracellular glutamate levels |             |             |             | 1           |
| 0.556671652 | 0.574892341                                                                                                                       | 0.467849    | 0.323968458 | 1           | 0.67698408  |
| 0.756217085 | 0.374394213                                                                                                                       | 0.457831651 | 1           | 0.757336841 | 0.708678165 |
| 1.011545712 | 0.387280526                                                                                                                       | 1           | 0.84928079  | 0.666258116 | 1.164301385 |
| 1.000543714 | 1                                                                                                                                 | 0.738542952 | 0.925672298 | 1.062289161 | 0.956010803 |
| 0.842665294 | 0.79334467                                                                                                                        | 1.131871147 | 0.865863872 | 1.004844307 | 1           |

|         |                                                                                                |             |             |             |             |             |
|---------|------------------------------------------------------------------------------------------------|-------------|-------------|-------------|-------------|-------------|
|         | 0.467638375                                                                                    | 0.423731551 | 0.571945405 | 0.5673592   | 0.836138521 | 1           |
|         | 0.495406633                                                                                    | 0.474284077 | 1.029653132 | 0.406068827 | 0.97693767  | 0.829215951 |
| YPR086W | YPR086W::SUA7::transcription factor TFIIB homolog                                              |             |             |             |             | 1           |
|         | 0.702590039                                                                                    | 0.811493785 | 0.799086274 | 0.891477103 | 1           | 0.668221407 |
|         | 0.625231313                                                                                    | 0.799176961 | 0.911214104 | 1           | 0.81902896  | 0.790326255 |
|         | 0.708070957                                                                                    | 0.915223304 | 1           | 0.92501711  | 0.605901124 | 0.853946338 |
|         | 1.325383867                                                                                    | 0.990875026 | 1.077018558 | 0.783865946 | 1           | 1.137737644 |
|         | 1.156035096                                                                                    | 0.890235234 | 1.080512962 | 1           | 1.038521702 | 1.103729616 |
|         | 1.227743101                                                                                    | 1.361636342 | 0.878369708 | 1           | 1.028508613 | 1.132712195 |
|         | 1.153425344                                                                                    | 0.698359589 | 0.865397779 | 0.884380232 |             |             |
| YIL078W | "YIL078W::THS1::Threonyl-tRNA synthetase, cytoplasmic"                                         |             |             |             |             | 1           |
|         | 0.849443258                                                                                    | 0.770324693 | 0.950376985 | 0.599099319 | 1           | 1.019634631 |
|         | 0.953027949                                                                                    | 0.670075377 | 0.696814326 | 1           | 0.853946965 | 0.759667588 |
|         | 0.390671185                                                                                    | 0.786333861 | 1           | 1.030922607 | 0.752566201 | 0.602588088 |
|         | 0.661792802                                                                                    | 1           | 0.91492103  | 0.600433503 | 0.478195573 | 0.794802116 |
|         | 0.887317701                                                                                    | 0.821811824 | 0.899623967 | 0.995833526 | 0.970276937 | 1           |
|         | 0.984544535                                                                                    | 0.685045822 | 0.736500745 | 0.584781846 | 0.58050984  | 1           |
|         | 0.960414825                                                                                    | 0.795957615 | 0.854833106 | 0.879619769 | 0.896318448 | 0.746031646 |
| YFL023W | YFL023W::BUD27::Function required for yeast viability on toxin exposure                        |             |             |             |             |             |
|         | 1                                                                                              | 0.768920415 | 0.851118359 | 0.806927753 | 1           | 0.7717427   |
|         | 0.795639358                                                                                    | 1.003475187 | 1           | 0.725174532 | 0.65824821  | 0.634859092 |
|         | 0.95609175                                                                                     | 1           | 0.506023869 | 0.403017767 | 0.573934657 | 1           |
|         | 1.078485295                                                                                    | 1.51389251  | 0.830193738 | 0.925756612 | 1           | 0.847030758 |
|         | 0.779354418                                                                                    | 0.659298094 | 0.775238966 | 0.945651947 | 1           | 0.775144746 |
|         | 0.922953908                                                                                    | 0.70298116  | 1.113298483 | 1.220610373 | 1           | 0.684500542 |
|         | 0.866807129                                                                                    | 0.97038636  | 0.801820659 | 0.682538076 | 1.01309692  |             |
| YIL080W | YIL080W                                                                                        |             |             |             |             |             |
|         | 1                                                                                              | 1.230181151 | 1.419441605 | 1.037345966 | 1.559884531 | 1           |
|         | 1.145583316                                                                                    | 1.201458917 | 1.434649298 | 1.369022276 | 1           | 1.186748025 |
|         | 1.332671835                                                                                    | 1.66500507  | 1.09736209  | 1           | 1.285622482 | 1.020202658 |
|         | 1.120846081                                                                                    | 1.397799571 | 1           | 1.652689409 | 1.215573517 | 0.675751816 |
|         | 0.870354245                                                                                    | 0.87070336  | 0.665364915 | 0.713719403 | 1           | 0.71190466  |
|         | 1.015067384                                                                                    | 0.789503628 | 1.524851304 | 1           | 0.973996951 | 1.221046954 |
|         | 1.040456163                                                                                    | 1.397893289 | 1.196102433 |             |             |             |
| YFL025C | YFL025C::BST1::Negatively regulates COPII vesicle formation 1                                  |             |             |             |             |             |
|         | 0.853447895                                                                                    | 0.592613217 | 0.640897899 | 1           | 0.894240976 | 0.898073732 |
|         | 0.623689507                                                                                    | 0.669890747 | 1           | 0.979862048 | 0.729441494 | 0.375154351 |
|         | 0.8730358                                                                                      | 1           | 0.697449439 | 0.760637115 | 0.810062346 | 1           |
|         | 0.519933332                                                                                    | 0.955709908 | 1.004328386 | 1           | 0.870081981 | 0.872356764 |
|         | 1.299666439                                                                                    | 1.574377089 | 0.942187155 | 1           | 0.965236865 | 0.799069895 |
|         | 0.837847626                                                                                    | 0.874076689 | 0.446127891 | 1           | 0.898314536 | 0.809322445 |
|         | 0.983198906                                                                                    | 0.695748465 | 0.790267961 | 0.680359857 |             |             |
| YIL083C | YIL083C::YIL083C::molecular_function unknown                                                   |             |             |             |             | 1           |
|         | 0.855396789                                                                                    | 0.794876488 | 0.808708442 | 1           | 0.774718219 | 0.757427694 |
|         | 0.898005165                                                                                    | 0.96683654  | 1           | 0.705821684 | 0.604205078 | 0.795683521 |
|         | 0.982519644                                                                                    | 1           | 0.80838677  | 0.535810848 | 0.640846601 | 0.936689363 |
|         | 1.655825533                                                                                    | 1.391930287 | 1.098689802 | 1.477767445 | 1           | 1.103841263 |
|         | 1.061533831                                                                                    | 1.189161406 | 1.183941571 | 0.930645391 | 1           | 0.956248069 |
|         | 0.909358699                                                                                    | 1.031066481 | 1.109469135 | 1.243019248 | 1           | 1.039512702 |
|         | 1.013322943                                                                                    | 1.10858324  | 1.105307086 | 0.834289207 | 0.98245011  |             |
| YFL039C | "YFL039C::ACT1::Involved in cell polarization, endocytosis and other cytoskeletal functions" 1 |             |             |             |             |             |
|         | 1                                                                                              | 1.287800791 | 0.740774623 | 0.875664624 | 0.735667639 | 1           |
|         | 0.966821789                                                                                    | 1.00308105  | 0.639597299 | 0.913065132 | 1           | 1.138173534 |
|         | 0.909816336                                                                                    | 0.944155287 | 0.72060033  | 1           | 1.160433231 | 1.929093011 |
|         | 0.887302456                                                                                    | 1           | 0.732303839 | 0.519904978 | 0.58317557  | 0.772301417 |
|         | 1.272684281                                                                                    | 0.768592252 | 1.759435376 | 1.486868163 | 0.708322617 | 1           |
|         | 0.992503669                                                                                    | 1.060913879 | 1.111651169 | 0.699392562 | 0.471414607 | 1           |
|         | 1.180470944                                                                                    | 1.006629254 | 0.910333494 | 0.707994319 | 0.946763564 | 0.790688469 |

YIL085C YIL085C::KTR7::Putative mannosyltransferase of the KRE2 family 1  
0.856104792 0.857134041 0.839841763 0.828641662 1 0.887795414  
0.845430335 0.947951673 0.963288877 1 0.772850463 0.681311433  
0.696553961 1 1.112377977 0.669613576 0.839159904 0.667526988 1  
1.055546902 1.034192708 0.68518844 0.734692996 1 0.93287941  
0.872446829 0.967103383 1.145862896 0.931097816 1 0.804256333  
0.681234064 0.597970202 0.63886002 0.911157464 1 0.949393859  
0.751907884 0.836279152 0.976840892 0.798381889 0.893136463  
YFL041W YFL041W::FET5::ferrous iron transport 1 0.896112564  
0.793279433 0.899970324 0.735839231 1 0.838925952 0.831643971  
0.847162629 1 1.353229122 1.179440044 0.673508372 0.976646629 1  
1.342446684 1.005678416 1.058345143 1 1.325287605 1.2897522  
1.20840693 1.361515584 1 1.905158831 2.23185105 2.702894823  
1.300398886 0.884050599 1 1.911325612 2.238982482 2.670137917  
1.402564893 0.488001165 1 1.90737865 2.151338117 1.068683496  
0.680661501 0.83684031 0.979823219  
YFL043C YFL043C 1 1.220202496 1.523105285 1.264620695 1  
1.073017503 1.032446858 1.522998087 1.364302062 1 1.790548709  
1.998388088 3.489830161 1.302769949 1 1.73194976 2.475702748  
2.834970264 1 1.922775103 6.442336388 4.002042309 1.83181867 1  
1.710250785 2.342605233 1.796616917 1.104690059 1.197291296  
0.930298239 1.660023419 1.623882227 1.020698463 1.279832039 1  
1.740588237 3.041738527 1.25946564 0.490881532 2.075532296 1.454411476  
YFL045C YFL045C::SEC53::involved in synthesis of GDP-mannose and dolichol-  
phosphate-mannose; required for protein assembly in endoplasmic reticulum 1  
1.126935232 0.810034913 0.60528779 0.973371746 1 0.832375074  
0.737402254 0.910923283 0.947647602 1 0.85755934 0.711000528  
0.706068461 0.775385483 1 0.835666522 0.49747614 0.378071796  
0.943458251 1 1.031364003 0.895868823 0.650012478 0.945137405 1  
1.225193481 1.054929646 0.853029341 1.05188746 1.219799756 1  
1.070254907 1.381373975 0.894052031 0.67757304 1.080310027 1  
1.005882033 1.209587251 0.820476861 1.234200851 1.416341076 1.485933951  
YPR088C YPR088C::SRP54::Signal recognition particle subunit (homolog of  
mammalian SRP54) 1 0.754090596 0.753845383 0.907102402 0.668167171 1  
0.834647935 0.82915406 0.69439398 0.743729147 1 0.769603362  
0.743668432 0.571473977 0.961255665 1 0.995944007 0.770988702  
0.793947572 0.728556948 1 0.963431972 0.53140876 0.521428322  
0.916143087 1 0.998798951 1.01391533 1.093912906 1.02537585  
0.950918085 1 1.136117942 0.886097721 1.172367073 1.122641446  
0.641048726 1 0.972824608 0.796334998 0.960342456 0.590689558  
0.651353354 0.751285375  
YIL087C YIL087C::YIL087C::molecular\_function unknown 1 1.417251964  
1.367736321 1.194975331 1.449186944 1 1.249742034 1.528991284  
1.68297792 1 1.478110249 1.631063986 0.759279252 2.420637905 1  
1.337580374 2.373049729 1.537288569 0.620501002 0.82971848  
1.190945762 1 1.160966023 1.195987042 1.491959945 1.234703411  
1.145107823 1 0.881083938 1.074775905 1.446421739 1.091804458  
0.827151986 1 0.911688273 0.870300973 0.997517749 0.61280052  
1.303216265 1.082271213  
YIL089W YIL089W::YIL089W::molecular\_function unknown 1 1.325358243  
1.079019257 1.367893395 1.28975536 1 1.208022618 1.032210908  
1.286150634 1.327299569 1 1.229359155 1.325327702 0.870700144  
1.273375469 1 1.136511706 1.021283406 1.42740781 1  
1.328049344 2.013999576 1.655260091 2.092243482 1 0.99566507  
1.037499278 0.903974152 1.237489428 1.256131654 1 0.792289134  
0.769746558 0.910088463 0.973405278 1.318992716 1 0.679833065  
0.758915023 1.00492683 0.645590587 3.578957585 0.893136463

YIL103W YIL103W::YIL103W::molecular\_function unknown 1 0.934367903  
0.628653319 0.684333401 0.795416152 1 0.758943929 0.681541679  
0.668752598 0.724203959 1 0.665536159 0.436792797 0.91316866  
0.532131123 2.090211741 0.416375616  
1 0.865619173 0.79420273 0.702260737 0.797570231 0.845654825 1  
0.720950222 0.816338183 0.645134293 0.715199722 1.223814866 1  
0.642637119 0.924661004 0.766273526 0.9399622 0.749741198 1.185594872  
YFL047W YFL047W::RGD2::specific GTPase activating protein (RhoGAP) 1  
0.777281959 0.875792642 0.894595617 0.686172286 1 0.855946691  
0.867143466 0.964800785 0.747466931 1 0.792114065 0.805416887  
0.527172522 0.912197954 1 0.791788664 0.703324676 0.74226384 1  
1.068025988 0.667215668 0.99306138 1.15232649 1 0.918262617  
0.765243144 0.923127094 1.113609152 1 0.868837272 0.525690997  
0.76669642 0.831295538 0.685286756 1 0.823702646 0.580458507  
0.9151853 0.547768667 0.964636941 0.795942198  
YIL105C YIL105C::YIL105C::molecular\_function unknown 1 0.953901298  
0.931898863 1.113574373 0.872562979 1 1.025043132 1.041231245  
0.783941523 0.8545917 1 1.119254605 1.05684999 1.36751487  
1.420877287 1 0.874392203 0.799956333 0.784238132 0.932454913 1  
1.103789688 1.677753421 1.185202112 1.252184112 1 0.857507122  
0.798344973 0.635210461 0.758489464 1.156684732 1 1.438869882  
1.048356428 1.114656367 0.978359038 1.064945452 1 0.983317285  
0.984748897 1.109272603 0.933563685 1.129657423 1.363346604  
YFL049W YFL049W::YFL049W::molecular\_function unknown 1 0.498069762  
0.557404646 0.75082283 0.535171424 1 0.617089327 0.649959407  
0.574948308 1 0.651417209 0.693742325 0.598976422 0.767132414 1  
0.685740295 0.454994895 0.648076763 0.707011418 1 1.102671014  
1.26264051 1.349944828 1.206460145 1 0.890328881 0.944776328  
0.745134231 0.711309271 0.955526647 1 1.070736772 0.712882563  
0.996268443 1.017074205 0.760438419 1 0.856650733 0.670898488  
0.94023249 0.247810529 0.982571021 0.678608579  
YIL107C YIL107C::PFK26::6-Phosphofructose-2-kinase 1 0.927559116  
1.0336458 1.356159582 0.908702785 1 1.3272786 1.21792924  
0.933011368 1 1.028135825 1.122055531 0.992519266  
1.29861856 1 0.878988967  
1.02222517 1.109359448 0.932154797 1.136126716 1 1.158487434  
1.121851562 2.141364826 1.727157853 1.287707133 1 1.496405086  
1.353409131 1.45848804 0.801272765 2.317686091 1.01309692  
YFL063W YFL063W::YFL063W::molecular\_function unknown 1 0.938990664  
0.879328865 0.753580975 0.661648232 1 1.069887961 0.919305631  
1.096329298 0.80906419 1 1.153879463 0.987106816 1.785659988  
0.844575277 1 1.106492611 1.233425232 1.851238031 1.243748529 1  
0.720296665 1.630656155 1.414455896 0.729677854 0.818284146  
0.729877977 0.613728331 0.934863942 1 0.695650309 0.847463102  
0.869011881 1.109779484 1.616295356 1 0.720291159 0.684665037  
1.176093409 1.028040306 1.119047469  
YIL109C YIL109C::SEC24::The Sec23p-Sec24p complex is one of three cytoplasmic  
COPII factors involved in ER to Golgi transport 1 1.171537836 0.79160334  
0.816672839 0.476680382 1 1.032798289 0.515216389 0.455145444 1  
1.351453454 1.11558292 0.365928757 0.955906884 2.45429817  
1.551456486 1 0.824608068  
0.68603537 1.034109591 0.946044816 0.691379423 1 0.781517817  
0.441700386 0.689537503 0.653444846 0.346151781 1 0.642985659  
0.590283325 0.910870315 0.515196414 0.785550793 0.713633558  
YFL065C YFL065C::YFL065C::molecular\_function unknown 1 0.71004594  
0.446954762 0.860856409 0.3176284 1 0.887678164 0.936220844  
0.390811248 0.399766928 1 0.78088786 0.7073676 0.25182447



|             |                                                                                  |             |              |             |             |             |
|-------------|----------------------------------------------------------------------------------|-------------|--------------|-------------|-------------|-------------|
| 0.705397011 | 1                                                                                | 0.529223958 | 0.332987725  | 0.669816574 | 1           |             |
| 0.584204476 | 0.578899689                                                                      | 0.441557819 | 0.816445469  | 1           | 0.803375566 |             |
| 0.854152349 | 1.032067857                                                                      | 1.078823055 | 1.121643063  | 1           | 0.732818384 |             |
| 0.369734716 | 0.859158215                                                                      | 1.147386973 | 0.399685892  | 1           | 0.621704819 |             |
| 0.400217481 | 0.942536006                                                                      | 0.188107016 | 0.834045776  | 0.695245482 |             |             |
| YIL111W     | YIL111W::COX5B::Cytochrome-c oxidase chain Vb                                    | 1           |              | 0.935645319 |             |             |
| 1.516344645 | 1.219504535                                                                      | 2.045754771 | 1            | 0.981631298 | 1.088028259 |             |
| 2.256404416 | 1.832613248                                                                      | 1           | 0.801631455  | 1.593148957 | 2.434027924 |             |
| 1.934539719 | 1                                                                                | 1.840450289 | 1.39935421   | 1.585997139 | 1.699184118 | 1           |
| 1.99143593  | 2.582329626                                                                      | 3.086508985 | 1.56742982   | 1           | 0.972814024 |             |
| 1.460890562 | 1.168862606                                                                      | 0.910806389 | 1.650405977  | 1           | 1.179541778 |             |
| 2.327955895 | 3.152237172                                                                      | 3.532227887 | 4.720256304  | 1           | 1.708924044 |             |
| 2.893851432 | 2.022814135                                                                      | 2.610582931 | 4.963492824  | 1.128679366 |             |             |
| YFL067W     | YFL067W::YFL067W::molecular_function unknown                                     | 1           |              | 0.596936555 |             |             |
| 0.454522206 | 0.789013412                                                                      | 0.306836319 | 1            | 0.798640438 | 0.911509155 |             |
| 0.434335655 | 0.507343067                                                                      | 1           | 0.848667332  | 0.737856004 | 0.409271843 |             |
| 0.725161903 | 1                                                                                | 0.838175057 | 0.786527932  | 0.937766268 | 0.491200434 | 1           |
| 0.458359783 | 0.211509447                                                                      | 0.227462284 | 1            | 0.924628055 | 0.876700934 |             |
| 1.264744518 | 1.144330705                                                                      | 1.046904794 | 1            | 0.886659098 | 0.533416809 |             |
| 0.935936744 | 1.148966082                                                                      | 0.394706263 | 1            | 0.857878088 | 0.572359232 |             |
| 1.317224212 | 0.530481265                                                                      | 0.87683259  | 0.678608579  |             |             |             |
| YIL113W     | YIL113W::SDP1::Hypothetical ORF                                                  | 1           | 1.460419922  | 1.736358515 |             |             |
| 1.40109169  | 1.305354576                                                                      | 1           | 1.659996881  | 1.652660651 | 1.384267499 | 1           |
| 2.045809354 | 2.938074941                                                                      | 1.824162487 | 1            | 3.031926251 |             |             |
| 4.524721873 | 1.633254534                                                                      | 0.515725968 | 0.948249701  | 0.902598796 | 1           |             |
| 1.368118906 | 2.119572686                                                                      | 1.858232519 | 0.986791833  | 1.028506097 | 1           |             |
| 1.277891449 | 1.60052458                                                                       | 2.42712895  | 1.349618172  | 1.151762556 | 1           |             |
| 1.705899121 | 1.637616535                                                                      | 1.455421568 | -0.120357884 | 1.545408512 |             |             |
| 0.973693878 |                                                                                  |             |              |             |             |             |
| YFR001W     | YFR001W::LOC1::Localization of mRNA                                              | 1           | 0.604327431  | 0.801652022 |             |             |
| 0.939906633 | 1                                                                                | 0.530358487 | 0.46055756   | 0.963367595 | 1           |             |
| 0.646138568 | 0.574208782                                                                      | 0.566242245 | 1            | 0.489830848 |             |             |
| 0.2804339   | 0.62760952                                                                       | 1           | 2.437662058  | 1.89871349  | 1.715854827 | 1           |
| 0.629292882 | 0.605001363                                                                      | 0.391373083 | 0.404921651  | 0.71584955  | 1           |             |
| 1.198164949 | 1.198814625                                                                      | 1.012374191 | 1.920503055  | 2.732479538 | 1           |             |
| 1.008039627 | 1.10720372                                                                       | 1.140397028 | 1.717225555  | 1.212220096 | 1.042868171 |             |
| YIL127C     | YIL127C::YIL127C::molecular_function unknown                                     | 1           |              | 0.625252962 |             |             |
| 0.690718412 | 0.643741507                                                                      | 0.943222749 | 1            | 0.547881587 | 0.571642216 |             |
| 0.926057759 | 0.952091618                                                                      | 1           | 0.472260826  | 0.492841151 | 0.610937414 |             |
| 0.852783578 | 1                                                                                | 0.394613471 | 0.208314028  | 0.453130205 | 1           |             |
| 0.722928933 | 0.487113559                                                                      | 0.641460891 | 0.774593275  | 1           | 0.721581405 |             |
| 0.605136966 | 0.437989651                                                                      | 0.530630082 | 0.885447453  | 1           | 0.990400972 |             |
| 1.16432581  | 0.961242398                                                                      | 1.870152968 | 2.140294716  | 1           | 0.623415269 |             |
| 0.936741487 | 1.211915458                                                                      | 0.978199505 | 1.141841658  | 1.132181817 |             |             |
| YFR003C     | YFR003C::YFR003C::molecular_function unknown                                     | 1           |              | 0.891096909 |             |             |
| 1.444781876 | 0.945241342                                                                      | 1.508126691 | 1            | 0.862691591 | 1.05261075  |             |
| 1.452336057 | 1.361196335                                                                      | 1           | 1.195800263  | 1.671456098 | 2.331128459 |             |
| 1.187324584 | 1                                                                                | 1.655621608 | 3.194972764  | 1.685847887 | 1.961540183 | 1           |
| 3.044453057 | 4.059258758                                                                      | 4.205767522 | 1.707238484  | 1           | 1.227574849 |             |
| 1.619846945 | 1.066037465                                                                      | 0.876021522 | 0.953762863  | 1           | 1.225648183 |             |
| 1.706036783 | 1.493998011                                                                      | 1.179231265 | 1.25771103   | 1           | 1.334733372 |             |
| 1.787394277 | 1.275783582                                                                      | 1.115448979 | 1.647925736  | 1.350212256 |             |             |
| YIL129C     | YIL129C::TAO3::Identified in a hunt for mutants that activate OCH1 transcription | 1.049056522 | 0.749342235  | 0.811774008 | 0.829186746 |             |
|             | 0.865211936                                                                      |             | 1.022812347  |             | 0.932976526 | 1           |
|             | 1.10233959                                                                       |             |              |             | 1           | 1.202109614 |
| 1.261292971 | 1.326891169                                                                      | 1.025107338 | 1.177986696  | 1           | 1.041121007 |             |

|         |                                                                                                                                                                         |             |             |             |             |             |
|---------|-------------------------------------------------------------------------------------------------------------------------------------------------------------------------|-------------|-------------|-------------|-------------|-------------|
|         | 1.269327808                                                                                                                                                             | 1.133955847 | 1.012011936 | 1.156953078 | 1           | 0.912372866 |
|         | 1.163737829                                                                                                                                                             | 1.00711738  | 0.549924041 | 0.945866506 | 1.138311158 |             |
| YFR005C | YFR005C::SAD1::Product of gene unknown                                                                                                                                  |             |             |             | 1           | 0.95559736  |
|         | 0.734465762                                                                                                                                                             | 0.856279538 | 1           | 0.830404428 | 0.801064687 |             |
|         | 0.915024263                                                                                                                                                             | 1           | 0.754391029 | 0.660070005 | 0.746704051 | 1           |
|         | 0.840538847                                                                                                                                                             | 0.332672038 | 0.887865062 | 0.84367672  | 1           | 1.216100445 |
|         | 1.621437868                                                                                                                                                             | 1.051644115 | 1.124815531 | 1           | 0.815424483 | 0.799343541 |
|         | 0.989384711                                                                                                                                                             | 1.015810302 | 0.918329037 | 1           | 0.900026068 | 0.673005444 |
|         | 0.569901139                                                                                                                                                             | 0.62982574  | 0.637113035 | 1           | 0.934098666 | 0.742142856 |
|         | 0.80455617                                                                                                                                                              | 0.772396486 | 0.863744454 | 0.858987149 |             |             |
| YFR019W | YFR019W::FAB1::May regulate vacuole homeostasis; mutation causes pleiotropic effects on nuclear migration and orientation and separation of mitotic chromosomes         |             |             |             | 0.467889054 | 0.564853719 |
|         | 0.478237573                                                                                                                                                             | 0.59202787  | 1.02288458  | 1.340626153 |             | 1.152246558 |
|         | 0.722420741                                                                                                                                                             | 1.786737465 | 1.414639156 | 1           | 0.807893092 |             |
|         | 4.662230914                                                                                                                                                             | 1           | 1.04441843  | 1.728809851 | 8.705915222 | 5.094333368 |
|         | 1.111677846                                                                                                                                                             | 1.069994601 | 0.96311885  | 1.032220809 | 1.063213778 | 1           |
|         | 0.940105732                                                                                                                                                             | 1.012747199 | 0.790241125 | 0.758225074 | 0.838973367 | 1           |
|         | 1.120571787                                                                                                                                                             | 1.136807391 | 1.050769937 | 1.187702572 | 1.038936994 | 1.588381945 |
| YFR019W | YFR019W::FAB1::May regulate vacuole homeostasis; mutation causes pleiotropic effects on nuclear migration and orientation and separation of mitotic chromosomes         |             |             |             | 1           | 0.963921021 |
|         | 1.062971372                                                                                                                                                             | 0.999522747 | 0.90329963  | 0.925325742 | 1           | 1.068152925 |
|         | 0.965694426                                                                                                                                                             | 0.777947531 | 0.92811802  | 1.433302604 | 0.707399485 |             |
|         | 0.825219923                                                                                                                                                             | 1.028723687 | 1           | 2.13765781  |             | 0.976761295 |
|         | 1.032012652                                                                                                                                                             | 1.210002726 | 1.306207644 | 0.860311779 | 0.988057742 | 1           |
|         | 1.76401403                                                                                                                                                              | 2.420888366 | 1.886136352 | 1.898454697 | 1.590366422 | 1           |
|         | 0.979249675                                                                                                                                                             | 1.627026569 | 0.953481945 | 1.135957422 | 1.211767812 | 1.068261305 |
| YFR021W | YFR021W::AUT10::Required for cytoplasm to vacuole targeting of proaminopeptidase I and starvation induced autophagy (AUT10). Needed for pre-Meiotic Replication (NMR1). |             |             |             | 1           | 0.818287322 |
|         | 0.789330431                                                                                                                                                             | 0.956580989 | 0.751260769 | 1           | 1.144745947 | 0.941207279 |
|         | 0.860845924                                                                                                                                                             | 1           | 1.615812089 | 1.069237392 | 0.706304065 | 1           |
|         | 0.902875729                                                                                                                                                             | 2.947082907 | 1.051872843 | 1.335581455 | 1           | 1.084589522 |
|         | 0.846386205                                                                                                                                                             | 1.356405846 | 1.043324402 | 1           | 0.886238101 | 0.679085162 |
|         | 0.902262686                                                                                                                                                             | 0.911553545 | 0.656051737 | 1           | 0.729731129 | 0.674832291 |
|         | 0.918040587                                                                                                                                                             | 0.546875719 | 0.738254707 | 0.73902664  |             |             |
| YBL106C | YBL106C::SRO77::Suppressor of defect in the small GTPase Rho3p                                                                                                          |             |             |             |             | 1           |
|         | 1.084365978                                                                                                                                                             | 0.884816909 | 1.126126988 | 0.757948572 | 1           | 1.082782752 |
|         | 1.082238739                                                                                                                                                             | 0.942664848 | 0.864603578 | 1           | 0.9487944   | 0.882429568 |
|         | 0.635763596                                                                                                                                                             | 0.917394767 | 1           | 1.113411478 | 2.340838168 | 1.494783152 |
|         | 0.810920022                                                                                                                                                             | 1           | 0.546563828 | 0.412800633 | 0.252002606 | 1           |
|         | 1.020181275                                                                                                                                                             | 1.074968969 | 1.046031953 | 1.460199378 | 1.18734644  | 1           |
|         | 0.914798836                                                                                                                                                             | 0.692236828 | 0.607562569 | 1.010248876 | 1           | 0.64929119  |
|         | 0.489647335                                                                                                                                                             | 0.72280223  | 0.628818717 | 0.577911863 |             |             |
| YBL108W | YBL108W::YBL108W::molecular_function unknown                                                                                                                            |             |             |             |             | 1           |
|         | 1.256408949                                                                                                                                                             | 1.449376386 | 1.167055339 | 1           | 1.323447298 | 1.313594163 |
|         | 1.169098319                                                                                                                                                             | 1.066515102 | 1           | 1.327060642 | 1.426103117 | 1.137903764 |
|         | 1.359727997                                                                                                                                                             | 1           | 1.272620053 | 1.624710783 | 0.795656281 | 1           |
|         | 0.432299034                                                                                                                                                             |             | 0.148870466 | 1           | 1.113450516 | 1.267431111 |
|         | 1.189171318                                                                                                                                                             | 1.095008065 | 1.118442877 | 1           | 1.070521407 | 1.218780092 |
|         | 1.133293886                                                                                                                                                             | 1.655698084 | 1.31212206  |             | 0.861297226 | 0.820308208 |
|         | 0.828939362                                                                                                                                                             | 0.722958828 | 0.868204573 | 0.638329872 |             |             |
| YBR009C | YBR009C::HHF1::Histone H4 (HHF1 and HHF2 code for identical proteins)                                                                                                   |             |             |             |             |             |
|         | 0.871751201                                                                                                                                                             | 1.043157298 | 0.691014195 | 1.324545101 |             |             |
|         | 0.636842956                                                                                                                                                             | 0.605208481 | 1.07190884  | 1.074235522 |             | 0.602816    |
|         | 0.783768293                                                                                                                                                             | 0.604148645 | 1.039686353 | 1           | 0.657222565 | 0.343596804 |

|          |                                                                                                                                                                                                             |             |             |             |             |             |
|----------|-------------------------------------------------------------------------------------------------------------------------------------------------------------------------------------------------------------|-------------|-------------|-------------|-------------|-------------|
|          | 0.242751984                                                                                                                                                                                                 | 0.617250814 | 1           | 3.521131131 | 2.456296099 | 1.014359724 |
|          | 1.850627075                                                                                                                                                                                                 | 1           | 0.776525291 | 0.680596591 | 0.528583363 | 0.796826164 |
|          | 1.079414847                                                                                                                                                                                                 | 1           | 0.476512121 | 0.969849078 | 0.568803321 | 1.027590082 |
|          | 1.363148996                                                                                                                                                                                                 | 1           | 0.690968348 | 1.376888885 | 1.172634405 | 1.505198401 |
|          | 1.701915022                                                                                                                                                                                                 | 1.484182726 |             |             |             |             |
| YBR011C  | YBR011C::IPP1::Inorganic pyrophosphatase                                                                                                                                                                    | 1           |             |             | 0.990541498 |             |
|          | 0.89439104                                                                                                                                                                                                  | 0.853584642 | 0.884833083 | 1           | 0.849070882 | 0.856337264 |
|          | 1.005150578                                                                                                                                                                                                 | 0.924554994 | 1           | 0.920370827 | 0.946913591 | 1.021587654 |
|          | 1.030767439                                                                                                                                                                                                 | 1           | 1.145248626 | 1.14750883  | 1.015206244 | 0.950567879 |
|          | 0.612453118                                                                                                                                                                                                 | 0.389474249 | 0.713584583 | 0.752208423 | 1           | 1.351846022 |
|          | 1.075450246                                                                                                                                                                                                 | 1.691678541 | 1.555932022 | 1.363962602 | 1           | 1.295699337 |
|          | 1.241571452                                                                                                                                                                                                 | 1.018741556 | 0.847595484 | 0.840149344 | 1           | 1.04943618  |
|          | 1.178899431                                                                                                                                                                                                 | 1.120125049 | 0.932136857 | 0.951563239 | 0.919405158 |             |
| YIL131C  | YIL131C::FKH1::forkhead protein                                                                                                                                                                             |             |             |             | 0.898839533 | 0.753897517 |
|          | 0.900107538                                                                                                                                                                                                 | 0.87030344  |             | 0.719440179 |             | 0.93174752  |
|          | 0.765576309                                                                                                                                                                                                 | 0.719247568 | 0.649722689 | 1.245273964 |             |             |
|          |                                                                                                                                                                                                             |             | 1           | 0.911813917 | 0.782046485 | 0.948143217 |
|          | 1.057429936                                                                                                                                                                                                 | 1.086536137 | 1           | 0.930113904 | 0.714304778 | 0.681430406 |
|          | 0.813608397                                                                                                                                                                                                 | 0.688369525 | 1           | 0.655372483 | 0.77652312  | 1.16668428  |
|          | 0.777327059                                                                                                                                                                                                 | 1.090997377 | 0.946549518 |             |             |             |
| YBR012WA | YBR012WA                                                                                                                                                                                                    | 1           | 1.142479207 | 0.852940755 | 1.522342768 | 0.709470655 |
|          | 1.293504452                                                                                                                                                                                                 | 1.220105621 | 1.076742163 | 0.875394741 | 1           | 1.601240155 |
|          | 1.851670501                                                                                                                                                                                                 | 0.709862221 | 1.381368589 | 1           | 0.932630516 | 0.969470482 |
|          | 0.833800978                                                                                                                                                                                                 | 0.511648324 | 1           | 0.403686907 | 0.283849836 | 0.378606349 |
|          | 1.060383044                                                                                                                                                                                                 | 1           | 0.870736495 | 0.908767087 | 1.237227909 | 1.181084235 |
|          | 0.896574223                                                                                                                                                                                                 | 1           | 1.068211719 | 1.39305891  | 2.549351591 | 5.232948338 |
|          | 1.971237128                                                                                                                                                                                                 | 1           | 0.885271332 | 1.687552418 | 2.128728195 | 0.942837058 |
|          | 0.951484122                                                                                                                                                                                                 | 0.761792884 |             |             |             |             |
| YIL133C  | YIL133C::RPL16A::Homology to rat L13a                                                                                                                                                                       | 1           |             |             | 1.557126986 |             |
|          | 0.976954546                                                                                                                                                                                                 | 0.764650096 | 1.349796774 | 1           | 0.998386299 | 0.94713543  |
|          | 0.942808403                                                                                                                                                                                                 | 0.991509089 | 1           | 0.88060115  | 0.763184548 | 0.635936593 |
|          | 0.804035267                                                                                                                                                                                                 | 1           | 0.916198899 | 0.300402292 | 0.276158352 | 0.413822466 |
|          | 0.931976513                                                                                                                                                                                                 | 0.433131126 | 0.276731236 | 0.621992692 | 1           | 1.057399295 |
|          | 0.904829102                                                                                                                                                                                                 | 0.828230563 | 1.021123437 | 0.998618146 | 1           | 1.122966166 |
|          | 1.301958094                                                                                                                                                                                                 | 0.764367912 | 0.596714824 | 1.233407499 | 1           | 1.169597596 |
|          | 1.226961792                                                                                                                                                                                                 | 0.80281598  | 1.196684725 | 0.897221666 | 1.018350701 |             |
| YBR013C  | YBR013C::YBR013C::molecular_function unknown                                                                                                                                                                | 1           |             |             | 1.276861315 |             |
|          | 1.192097832                                                                                                                                                                                                 | 0.976520348 | 1.45883286  | 1           | 0.832591084 | 0.900228352 |
|          | 1.275299796                                                                                                                                                                                                 | 1.209216235 | 1           | 1.095631397 | 1.2402735   | 2.666286918 |
|          | 0.50258666                                                                                                                                                                                                  |             | 0.555167467 | 0.574874999 | 1           | 1.455263309 |
|          | 2.595494406                                                                                                                                                                                                 | 2.127289837 | 1           | 1.04658744  | 1.252564303 | 1.122256565 |
|          | 0.956293537                                                                                                                                                                                                 | 1.103328482 | 1           |             | 2.108123706 | 2.965518774 |
|          | 3.695886361                                                                                                                                                                                                 | 1           | 0.950007932 | 1.494436019 | 1.440195179 | 1.030659753 |
|          | 1.587530473                                                                                                                                                                                                 | 1.536720116 |             |             |             |             |
| YIL135C  | YIL135C::YIL135C::molecular_function unknown                                                                                                                                                                | 1           |             |             | 1.341388748 |             |
|          | 1.20704106                                                                                                                                                                                                  |             | 0.984855869 | 1           | 1.141883034 | 1.085255032 |
|          | 0.945986836                                                                                                                                                                                                 | 1           | 1.463502876 | 1.364027828 |             | 1.32405528  |
|          | 0.858120144                                                                                                                                                                                                 | 1.376660888 |             | 0.764666236 |             |             |
|          | 1.618371743                                                                                                                                                                                                 | 1.637872907 | 1.16765546  | 1.170936248 | 1.119758861 | 1           |
|          | 0.806719202                                                                                                                                                                                                 | 0.884318073 | 1.145993915 | 0.694706157 | 0.844701917 | 1           |
|          | 1.22760873                                                                                                                                                                                                  | 1.140557229 | 1.116362945 | 0.969259003 | 1.019333312 | 0.986828225 |
| YBR015C  | "YBR015C::MNN2::Probable type II membrane protein involved in mannan synthesis. Catalyzes addition of first mannose to branches on poly 1,6-mannose backbone of outer chain of cell wall N-linked mannans." | 1           |             |             | 0.851051029 |             |
|          | 0.696379235                                                                                                                                                                                                 | 0.884446137 | 0.606653375 | 1           | 0.983829101 | 0.918716501 |
|          | 1                                                                                                                                                                                                           | 0.821644995 | 0.675935266 |             | 1           | 0.72660614  |
|          | 0.549948142                                                                                                                                                                                                 | 0.520061114 | 1           | 0.785775028 | 0.37218988  | 0.422936175 |

|             |                                                                                                   |             |             |             |             |             |             |
|-------------|---------------------------------------------------------------------------------------------------|-------------|-------------|-------------|-------------|-------------|-------------|
| 0.749929442 | 1                                                                                                 | 0.90825822  | 0.778827091 | 0.958605999 | 1.467181855 |             |             |
| 1.170064303 | 1                                                                                                 | 0.760548756 | 0.36451734  | 0.677228617 | 0.775311677 |             |             |
| 0.301249439 | 1                                                                                                 | 0.428227306 | 0.287672565 | 0.747731914 | 0.382291357 |             |             |
| 0.460265183 |                                                                                                   | 0.472836979 |             |             |             |             |             |
| YFR023W     | YFR023W::PES4::Suppressor of DNA polymerase epsilon mutation                                      |             |             |             |             | 1           |             |
|             |                                                                                                   |             | 1           |             |             | 1           |             |
|             | 1                                                                                                 | 1.100272319 | 1.8243325   | 2.335435136 | 1           | 1.338022629 |             |
| 3.303795684 | 3.272703937                                                                                       | 1.785987807 | 1           |             |             | 1.091527942 |             |
| 1.223199283 |                                                                                                   | 0.591474638 |             |             | 1           | 0.514744172 |             |
| YIL137C     | YIL137C::YIL137C::molecular_function unknown                                                      |             |             |             |             | 1           | 1.18333012  |
| 0.779804677 |                                                                                                   | 0.625266308 | 1           | 1.316290658 | 1.27221979  | 0.680459214 |             |
| 0.707018327 | 1                                                                                                 | 1.295059945 | 1.160527464 | 0.864516127 | 0.891855753 |             |             |
| 1.971256516 |                                                                                                   |             |             | 0.677545214 |             | 1           |             |
| 1.050977331 | 1.091475185                                                                                       | 0.705105929 | 0.965223989 | 0.89635235  | 1           |             |             |
| 0.851201311 | 0.660424121                                                                                       | 0.924750858 | 0.750424501 | 0.504224992 | 1           |             |             |
| 0.921987639 | 0.960651348                                                                                       | 0.990904585 | 0.784296864 | 0.708899649 | 0.865116491 |             |             |
| YBR017C     | "YBR017C::KAP104::Karyopherin of 103,613 Da. Similar to yeast karyopherin beta (Kap95p; YLR347c)" |             |             |             |             | 1           | 1.213032352 |
| 0.862933576 | 1                                                                                                 | 1.086055923 | 1.117408337 | 0.941216183 | 0.792784339 | 1           |             |
| 1.219014532 | 0.915894474                                                                                       |             | 1           | 0.814704286 |             | 0.519936261 |             |
| 1           | 0.790800664                                                                                       | 0.786992333 | 0.57432437  | 0.867518869 | 1           | 0.96326501  |             |
| 0.853794797 | 0.965705116                                                                                       |             | 1.149770245 | 1           | 1.065351894 | 0.751155186 |             |
| 0.921014877 | 0.940034676                                                                                       | 0.482922515 | 1           | 0.773257953 |             | 1.018937869 |             |
| 0.656267197 | 0.642980202                                                                                       | 0.739902305 |             |             |             |             |             |
| YFR025C     | YFR025C::HIS2::Histidinolphosphatase                                                              |             |             |             |             | 1           | 0.983830361 |
| 1.135418441 | 1.323010999                                                                                       | 0.932205294 | 1           | 1.234223889 | 1.366937232 |             |             |
| 1.471879337 | 1                                                                                                 | 1.220503963 | 1.297631762 | 1.26561036  | 1.167587829 | 1           |             |
| 1.744059914 | 1.416915715                                                                                       | 1.119063147 | 1.071881724 | 1           | 1.232302011 |             |             |
| 1.245672811 | 1.100308963                                                                                       | 1.101193414 | 1           | 1.14236127  | 1.064767683 |             |             |
| 1.248582557 | 1.025179221                                                                                       | 1.23159025  | 1           | 1.09437787  | 1.111844339 |             |             |
| 1.4754379   | 1.028110408                                                                                       | 0.825566822 | 1           | 1.173907722 | 1.118892105 |             |             |
| 1.286856412 | 0.955831973                                                                                       | 1.22592867  | 0.922907714 |             |             |             |             |
| YIL151C     | YIL151C::YIL151C::molecular_function unknown                                                      |             |             |             |             |             | 1.231287    |
| 1.017512889 | 0.829186746                                                                                       |             | 0.854773932 | 0.765572283 | 0.734038947 |             |             |
| 0.837581575 | 1.003085845                                                                                       |             | 1.212971494 | 1.200240466 |             |             |             |
| 1.590726159 |                                                                                                   |             |             |             |             | 0.871923402 |             |
| 0.83664449  | 0.898179813                                                                                       | 1.283690821 | 1.073610364 | 1           | 1.164663897 |             |             |
| 0.795155604 | 1.111112995                                                                                       | 0.865356307 | 0.870448294 | 1           | 0.792406949 |             |             |
| 0.908460296 | 0.612293488                                                                                       | 0.670676056 | 0.81392947  | 0.47896632  |             |             |             |
| YBR031W     | "YBR031W::RPL4A::Homology to rat L4, Xenopus L1, Drosophila L1"                                   |             |             |             |             | 1           |             |
| 1.155267163 | 0.777524569                                                                                       | 1.167093102 | 0.855739362 | 1           | 1.073354671 |             |             |
| 0.913535255 | 0.916436317                                                                                       | 1           | 1.128701696 | 1.042745285 |             | 1           |             |
| 0.870820613 | 0.609369111                                                                                       | 0.660896821 | 1           | 0.900156505 | 0.445045032 |             |             |
| 0.360347185 | 0.681241389                                                                                       | 1           | 1.152327317 | 0.693639326 | 1.168353528 |             |             |
| 1.324418304 | 1.199840175                                                                                       | 1           | 1.077742855 | 0.637826283 | 0.756408655 |             |             |
| 0.423590094 | 0.367804711                                                                                       | 1           | 0.906034197 | 0.298912307 | 0.655407555 |             |             |
| 0.522054236 | 0.476590434                                                                                       | 0.604180558 |             |             |             |             |             |
| YFR027W     | YFR027W::ECO1::Establishment of Cohesion                                                          |             |             |             |             | 1           | 1.03935832  |
| 1.570599462 | 1.35054306                                                                                        | 1.681907462 | 1           | 1.17981345  | 1.100332694 |             |             |
| 1.485231519 | 1.427333532                                                                                       | 1           | 0.972803653 | 1.035961365 | 1.27218395  |             |             |
| 1.429164496 | 1                                                                                                 | 0.694669361 |             | 0.47808271  | 0.751096092 | 1           |             |
| 1.137167718 | 1.262144031                                                                                       | 1.27801728  | 1.548157376 | 1           | 0.839961995 |             |             |
| 0.998206372 | 0.805597092                                                                                       | 1.008957969 | 1           | 0.914280185 | 1.16920415  |             |             |
| 1.431781684 | 1.373444787                                                                                       | 1.449226948 | 1           | 1.142294878 | 1.123414998 |             |             |
| 1.135660001 | 0.688362605                                                                                       |             | 0.978071994 |             |             |             |             |

YIL153W YIL153W::RRD1::Resistant to Rapamycin Deletion 1 1.170320271  
0.9311101713 0.362089599 1 1.000142945 0.984498459 0.494553857  
0.635504625 1 1.378592041 1.315989714 0.861463863 0.884113274  
0.269426936 1.22004699 1  
0.862843731 0.669906189 0.956304556 0.78164511 1 0.821539446  
0.985325709 1.049612462 1.073756713 1.028725538 1 0.978579556  
0.896359819 0.974226396 0.608115519 1.22768654 0.883504567  
YBR033W YBR033W::EDS1::Expression dependent on Slt2 1 1.318386762  
1.275995474 1.24063048 1.282081225 1 1.183326126 1.18140789  
1.200197563 1.307141198 1 1.263139593 1.112016937 1  
1.176078404 0.976208175 0.948870503 1 0.851706665 1.166921669  
1.049841587 0.897627553 1 1.210661592 1.026228216 0.857411474  
0.981465044 1.107927017 1 1.087703131 1.045188793 1.340997107  
0.865626325 1.185606757 1 1.29369558 1.393116933 1.766120772  
1.557012873 0.888758347  
YFR029W "YFR029W::PTR3::Regulator of expression of the PTR2, GAP1, and BAP2  
genes; involved in the the control of peptide transport" 1.009655331  
1.190064761 0.954896653 0.962326508 1.109026858 1.06323377  
1.099733378 0.95528908 1.191164387 1.1106028 1.173240204  
0.939829419 1 1.366799648 0.813237553 1.284503374 1.191164046 1  
0.861126486 1.784773356 1.278999122 0.624579166 1 1.018555525  
1.102870205 1.030082474 0.946163097 0.862540979 1 1.127494092  
1.40711423 1.283316172 1.240015796 0.939409789 1 1.079003468  
1.119465859 1.004365021 1.116690196 1.153255473 1.135684372  
YIL157C YIL157C::YIL157C::molecular\_function unknown 1 1.285232497  
1.320791335 1.027253216 1.22597673 1 1.284283447 1.109289711  
1.524614068 1.529045114 1 1.043212345 1.207434199 0.721807653  
1.126492779 1.058224059 0.559768316 1.038249262 0.913198501 1  
2.30831615 1.439314668 1.732956326 1.557028636 1 1.104213162  
1.14524217 1.167573297 1.037654004 1.227861821 1 1.024967526  
1.144505065 1.064922947 0.886936622 1.162111135 1 1.086682112  
0.858937061 0.873038685 0.795297588 1.414324493 0.983325775  
YFR042W YFR042W::YFR042W::molecular\_function unknown 1 1.487673632  
1.595903623 1.706578486 1.427340755 1 1.552502592 1.4227982  
1.412311303 1 1.225569192 1.324042058 1.28946672  
1 1.10710051  
1.054621956 0.80812884 1.067915973 1 1.136103283 0.97335251  
1.497758495 0.892486068 1.102988368 1 1.259303362 1.249039395  
0.83811706 1.335006254 1.18281587 1.269654842  
YIL159W "YIL159W::BNR1::Bni1p-related protein, helps regulate reorganization  
of the actin cytoskeleton, potential target of Rho4p" 1 1.276408682  
0.853649551 1.23708934 0.923826781 1 1.166451555 1.036513626  
0.820733418 0.917245227 1 1.039643048 1.000597669 1.127501314  
0.932810485 1 1  
0.936653944 0.701295646 0.930986727 1.056226921 1.017303949 1  
1.007491671 1.039910855 0.736914644 0.742263896 0.823602342 1  
0.62549589 0.995235186 0.891545386 0.596369419 0.889692425 0.770549116  
YFR044C YFR044C::YFR044C::molecular\_function unknown 1 1.051502346  
0.739858618 0.878730443 0.731897456 1 0.96168019 0.90690456  
0.722912256 0.868485622 1 0.972393665 0.857140836 0.85575989  
0.649506702 1 2.147638347 1.254433191 1.816727306 0.921440539 1  
0.753300713 0.624479268 0.634888358 0.499002418 1 1.049759034  
0.87006772 1.011732071 0.941247577 0.715691005 1 1.393253403  
1.022678302 0.919103395 0.654854445 0.523113417 1 1.255742741  
1.051922591 0.701209834 1.05993234 1.049290858 0.789812857  
YIL161W YIL161W::YIL161W::molecular\_function unknown 1 0.597484581  
0.816594787 0.785635512 0.860028867 1 0.661765858 0.695465635

|             |                                                                                                                                                                                                                                                                    |             |             |             |             |
|-------------|--------------------------------------------------------------------------------------------------------------------------------------------------------------------------------------------------------------------------------------------------------------------|-------------|-------------|-------------|-------------|
| 0.875988548 | 0.896272194                                                                                                                                                                                                                                                        | 1           | 0.687253574 | 0.853842274 | 1.473484462 |
| 0.952761935 | 1                                                                                                                                                                                                                                                                  | 0.676014812 | 0.646885035 | 1.337459603 | 1           |
| 1.306568979 | 2.015349999                                                                                                                                                                                                                                                        | 2.391793058 | 1.761469681 | 1           | 0.778224685 |
| 0.955323379 | 0.58398452                                                                                                                                                                                                                                                         | 0.603461065 | 1.010170093 | 1           | 0.812048423 |
| 0.975367151 | 1.550115653                                                                                                                                                                                                                                                        | 1.871533674 | 1           | 1.1400839   |             |
| 0.807890076 | 2.372282816                                                                                                                                                                                                                                                        | 1.108540012 |             |             |             |
| YFR046C     | YFR046C::YFR046C::molecular_function                                                                                                                                                                                                                               | unknown     | 1           | 1.203041132 |             |
| 1.281599894 | 1.78834179                                                                                                                                                                                                                                                         | 1.407074579 | 1           | 1.456939922 | 1.284798908 |
| 1.649126832 | 1.606558675                                                                                                                                                                                                                                                        | 1           | 0.947541432 | 1.499234394 | 1.536639629 |
| 1.565776688 | 1                                                                                                                                                                                                                                                                  | 0.626443469 | 2.110609915 | 1.720746113 | 0.641285741 |
| 0.610667344 | 0.308428636                                                                                                                                                                                                                                                        | 0.19658956  | 0.337039096 | 1           | 1.15204661  |
| 1.167115862 | 1.089775674                                                                                                                                                                                                                                                        | 1.651723888 | 1.926403561 | 1           | 0.893802975 |
| 0.404406402 | 0.765375236                                                                                                                                                                                                                                                        | 0.667594306 | 0.258819273 | 1           | 0.739074811 |
| 0.433846547 | 0.375986667                                                                                                                                                                                                                                                        | 0.481091576 | 0.698069666 | 0.422926401 |             |
| YIL175W     | YIL175W::YIL175W::molecular_function                                                                                                                                                                                                                               | unknown     |             | 0.956710011 |             |
| 0.759591601 | 0.651014406                                                                                                                                                                                                                                                        | 0.940735668 | 0.833671942 | 0.829437463 |             |
| 0.859884051 | 1.230950305                                                                                                                                                                                                                                                        | 0.926560078 | 1.027938403 | 1           |             |
| 0.979752257 | 1.317338269                                                                                                                                                                                                                                                        | 1.075636202 | 1           | 0.840272154 | 0.77994554  |
| 1.410497578 | 0.569641143                                                                                                                                                                                                                                                        | 1           | 1.262345862 | 1.244436105 | 1.823320503 |
| 1.597344766 | 1.3508446                                                                                                                                                                                                                                                          | 1           | 1.680366549 | 0.838555812 |             |
| 1.156702474 | 1                                                                                                                                                                                                                                                                  | 1.315154465 | 1.474152979 | 0.940225103 |             |
| 1.082271213 |                                                                                                                                                                                                                                                                    |             |             |             |             |
| YFR048W     | YFR048W::RMD8::Required for Meiotic nuclear Division                                                                                                                                                                                                               | 1           |             |             |             |
| 0.712481536 | 0.764542404                                                                                                                                                                                                                                                        | 0.953918612 | 0.822421478 | 1           | 0.893487169 |
| 0.870238413 | 0.723516102                                                                                                                                                                                                                                                        | 0.781566791 | 1           | 0.755263342 | 0.763716478 |
| 0.638104965 | 0.907518108                                                                                                                                                                                                                                                        | 1           | 0.867269229 | 0.868887997 | 1.232290805 |
| 0.890003707 | 1                                                                                                                                                                                                                                                                  | 0.899791719 | 1.227841092 | 1.132181062 | 1.151378687 |
| 0.872127616 | 0.871408396                                                                                                                                                                                                                                                        | 0.931168929 | 0.94791964  | 1.05014862  | 1           |
| 1.016230344 | 0.94996428                                                                                                                                                                                                                                                         | 1.06416631  | 0.923970591 | 0.746360106 | 1           |
| 0.964744316 | 1.08187246                                                                                                                                                                                                                                                         | 1.167296889 | 0.901892695 |             |             |
| YFR050C     | "YFR050C::PRE4::B-type subunit of proteasome, euk. & archae. multicatalytic proteinase complex likely involved in an ATP/ubiquitin-dependent nonlysosomal proteolytic pathway. eukary: the proteasome is composed of ~24 subunits forming a ring-shaped structure" | 1           | 1.2739028   | 1.346979152 |             |
| 1.274143398 | 1.369724994                                                                                                                                                                                                                                                        | 1           | 1.222467464 | 1.267465321 | 1.407324835 |
| 1.316028967 | 1                                                                                                                                                                                                                                                                  | 1.168313047 | 1.636633669 | 2.057923777 | 1.065506012 |
| 1.103356979 | 1.128488453                                                                                                                                                                                                                                                        | 1.362925688 | 1.192863718 | 1           | 1.329839253 |
| 1.187584566 | 1.643846647                                                                                                                                                                                                                                                        | 1.197492207 | 1           | 1.431896811 | 1.470875658 |
| 1.186842533 | 0.842980346                                                                                                                                                                                                                                                        | 0.962353252 | 1           | 1.677664944 | 1.940041792 |
| 1.952664504 | 0.95933642                                                                                                                                                                                                                                                         | 0.900452397 | 1           | 1.345793992 | 1.78813399  |
| 0.478319324 | 1.226536955                                                                                                                                                                                                                                                        | 0.981434743 | 1.432520897 |             |             |
| YFR052W     | YFR052W::RPN12::Part of 26S proteasome complex that may activate Cdc28p                                                                                                                                                                                            | 1           | 0.796273134 | 1.08391272  | 1.000575345 |
| 1.39344911  | 1                                                                                                                                                                                                                                                                  |             |             |             |             |
| 0.919543523 | 1.074924767                                                                                                                                                                                                                                                        | 1.182814419 | 1.102089946 | 1           | 0.845734846 |
| 1.164661231 | 1.645743746                                                                                                                                                                                                                                                        | 0.937047879 | 1           | 1.474596691 | 1.553334816 |
| 2.04424275  | 2.414242367                                                                                                                                                                                                                                                        | 1           | 1.694154715 | 3.294616288 | 3.606757811 |
| 1.843410736 | 1                                                                                                                                                                                                                                                                  | 1.25857057  | 1.436348384 | 1.114176836 | 0.692253768 |
| 0.945505236 | 1                                                                                                                                                                                                                                                                  | 1.258638771 | 2.233112126 | 2.04889387  | 1.000674802 |
| 1.60860628  | 1                                                                                                                                                                                                                                                                  | 1.400144204 | 1.865543838 | 1.166832446 | 1.407854253 |
| 1.355490423 | 1.802909829                                                                                                                                                                                                                                                        |             |             |             |             |
| YBR035C     | YBR035C::PDX3::pyridoxine (pyridoxiamine) phosphate oxidase                                                                                                                                                                                                        | 1           |             |             |             |
| 1.286192794 | 1.426790649                                                                                                                                                                                                                                                        | 1.413431218 | 1.364543453 | 1           | 1.319030017 |
| 1.321577123 | 1.693992088                                                                                                                                                                                                                                                        | 1.707175045 | 1           | 1.543336881 | 2.080975861 |
| 1           | 1.473953594                                                                                                                                                                                                                                                        | 0.870782936 | 0.998932489 | 1           | 1.070073466 |
| 1.62404805  | 1.12371259                                                                                                                                                                                                                                                         | 1.23927174  | 1           | 1.317118277 | 1.593837493 |
| 1.42548515  | 1.116852623                                                                                                                                                                                                                                                        | 1.195565354 | 1           | 1.212621205 | 1.516033547 |

1.523366333 1.30452432 1.223207785 1 1.102272151 1.153492257  
1.040034055 0.728689025 1.348426028 1.28541608  
YBR037C YBR037C::SCO1::inner mitochondrial membrane protein 1  
0.910337598 1.096722223 0.851064831 0.768330158 1 0.889399487  
1.066109918 0.950722601 0.832674469 1 0.962222396 1.03365773  
1.351330833 0.862997153 1 1.51708254 1.192762025 1.118012219  
1.503847496 1 2.029786362 1.569249566 1.728550985 2.327736052  
0.847663501 0.976341855 0.972181983 1 0.802492267 0.946738386  
1 0.896918462 0.856473174 0.825945299 0.53412372  
1.093191384 1.242510482  
YBR039W YBR039W::ATP3::participates in catalysis of ATP hydrolysis/synthesis  
and in the assembly/stability of F1 1 0.841606798 0.769512186 0.855442542  
0.994373556 1 0.87691355 0.918447138 1.017780536 1  
0.725768259 0.709206504 0.700414316 0.952783859 1 1.628124248  
1.266685111 1.158068987 1.553459118 1 1.181575979 0.54090221  
0.899732779 1.431229298 1 0.927342918 0.730920334 0.610836746  
0.807389431 1.081469068 1 1.140766764 0.821974067 0.653323321  
0.633405864 0.754218787 1 0.834639188 0.683921518 0.510598229  
0.768457463 0.864133137 0.923783274  
YBR041W YBR041W::FAT1::Putative membrane-bound long-chain fatty acid  
transport protein homologous to mouse fatty acid transport protein 1  
0.878830698 0.681046529 0.962413978 0.808717775 1 0.94699301  
0.9955024 0.774464198 1 0.961337678 0.948818659 0.709694315  
0.984869683 1 1.225546992 0.912402639 1.057701022 0.812802839 1  
1.229835312 0.78683465 0.888681802 1.068308534 1 0.92753026  
1.155399781 1.029010282 1.091629234 1.248239259 1 0.670327529  
0.70482814 0.741352055 0.613705561 1.156991238 0.864390835  
0.830863071 1.127018987 0.729394796  
YIL177C YIL177C::YIL177C::molecular\_function unknown 1 0.922498423  
0.646678905 0.945768753 0.437283673 1 1.091199262 1.163054402  
0.517334514 0.544613772 1 0.867948288 0.890467237 0.381299007  
0.841245543 1 0.867097321 0.736093386 0.738407359 0.503262676 1  
0.598240181 0.407782623 0.362766153 0.695568927 1 0.836603214  
0.981875266 1.325009724 1.13110115 1.085400517 1 0.777985967  
0.746130481 0.894062574 1.098763028 0.539391358 1 0.766302137  
0.893110267 1.099981085 0.786365195 1.029570467 0.760041607  
YBR055C YBR055C::PRP6::RNA splicing factor 1 0.955103413 0.875108735  
1.087654231 0.883237876 1 0.978078078 1.026284333 1.055261361  
0.928983929 1 1.176505259 1.093588976 1.01672778 1.264984961 1  
1.416377527 1.41205565 1.295070229 0.937500806 1 0.772602746  
0.67788079 0.710140442 0.744801662 1 1.224527272 1.031444628  
1.049242916 0.915715246 1.16737918 0.827052493 0.85800331  
0.917131883 1.146322921 1.28681396 0.838323585  
1.052837713 0.797618831 0.95705708  
YIR002C YIR002C::MPH1::Mutator PHenotype; Similar to ATP-dependent RNA  
helicases 0.886526675 0.965263435 0.943510168  
0.729786297 0.97415069 1.035504914 0.649722689 1.35687879  
1.340231093 0.936038225 1 0.582759016  
0.532790656 1 0.917116086 0.901341863 0.874428027 0.936895721  
1.068876101 1 0.979185 1.031428885 0.919620616 0.951002139  
0.925237792 1 1.115258398 1.285490899 1.033887391 0.780703955  
1.037871227 0.95530575  
YBR057C YBR057C::MUM2::Muddled Meiosis 0.959172554 0.922442583  
0.90122567 0.990716593 1.059938601 1.048216015  
0.892167691 1.054543827 0.871750227 1.118005399 1 0.850082669  
0.605271582 0.692705363 0.90739271 1.215390382 0.716778349  
1.029810729 0.886014207 1 0.908141512 0.968271381 0.802200088

1.217848989 1 1.029676958 1.196759227 0.875698621 1.033502569  
1.420282332 1 0.985895999 1.264609692 1.296339889 1.206242853  
1.387492473 1.123425585  
YIR004W YIR004W::DJP1::DnaJ-like protein required for Peroxisome biogenesis;  
Djp1p is located in the cytosol 1 0.602368338 0.872245554 0.826345827  
0.899266958 1 0.706781814 1.000383262 1.012532455 0.792084712 1  
0.702761181 0.966098872 0.762245382 1.019869351 1.455639834  
0.770348718 1 0.948020601 1 1.0541397  
1.104378714 1.032101566 0.753645481 0.974713207 1 1.188837132  
1.272949924 1.341877466 1.108058564 1.110808178 1 1.31964537  
1.496108839 1.3336028 0.671821546 1.354625445 0.956181415  
YBR059C YBR059C::AKL1::Ark-family kinase-like protein. This protein is the  
third member (After Ark1p and Prk1p) of the Ark-family kinases in *S. cerevisiae*.  
1 0.903460889 0.868154132 1.077089469 0.776978648 1 1.058015237  
1.084375913 0.978315267 0.809773653 1 1.252494032 1.264580469  
0.917761494 0.995383264 1 1.353856591 1.028830436 1.401897125  
1.107600125 1 1.894982395 1.97723624 1.018703889 1  
1.016448415 1.096084106 1.046458352 0.943156151 1 1.047181164  
0.732914417 0.982945403 1.162389668 0.622122528 1 1.015966029  
0.926905269 1.120006269 0.494566841 1.170187934 0.826589061  
YGL009C YGL009C::LEU1::leucine biosynthesis 1 1.081106664 0.872008089  
1.367494639 0.825530418 1 1.292934134 1.305138352 0.836210461  
0.886888378 1 0.638372561 0.577966884 0.653121202 1.176361313 1  
0.536098573 0.195983507 0.588905988 0.888293758 1 0.367992614  
0.278302073 0.337873177 0.770024958 1 0.346823747 0.306773743  
0.449407522 0.997390741 0.78618507 1 0.118093153 0.074032788  
0.066117134 0.079073904 0.34929215 1 0.155891534 0.070518823  
0.160407712 0.710651479 0.668743227 0.745156034  
YIR006C YIR006C::PAN1::Involved in actin organization and endocytosis 1  
1.013435336 0.872865793 1.006429547 0.624986317 1 1.121218502  
1.01819748 0.788098409 0.7266255 1 1.376046156 1.010927042  
0.7785577 0.960209356 1 0.886466485 0.877007284 0.970651743  
0.918023486 1 0.879841647 0.873938014 0.906724012 1.156876512 1  
1.012818219 0.821224089 0.949859834 1.003262378 1.197563199 1  
0.90156377 0.661641621 0.746407928 0.716254685 0.646721278 1  
0.894509125 0.932615011 1.041646036 0.663524799 0.915286901 0.83446968  
YBR061C YBR061C::TRM7::tRNA methyltransferase 0.938240724  
0.737954066 1.322766683 0.895756656 0.960107283 0.769965755  
1.336904745 1.345582193 0.567852655 0.756267627 0.844873206  
1.334362042 1 0.539966818 1.321174236 1.6179849 0.415373449 1  
0.79878414 0.329884918 0.226065652 0.416127131 1 0.96448983  
0.762125189 0.945032852 0.850987687 1 0.956170152 0.88377446  
0.724866477 1.01430458 1.151558479 1 0.745342979 0.520877395  
0.682508166 0.517876968 0.654908472 0.759165994  
YGL011C YGL011C::SCL1::Proteasome subunit YC7alpha/Y8 (protease yscE subunit  
7) 1 0.787714061 1.056253249 0.838770065 1.194122076 1 0.792090413  
0.995889141 1.087442975 1.062866314 1 0.763664634 1.066214392  
1.39049329 0.884979449 1 1.360708086 1.369358743 1.728214379  
1.947918376 1 1.433076058 2.023353049 3.074448809 1.490751468 1  
1.108019965 1.358092572 1.078063166 0.719306919 0.94127147 1  
1.470868469 2.490931497 2.373356352 1.037518334 1.542922438 1  
1.332299626 1.810978157 1.281930198 1.499335968 1.403604253 1.45266025  
YIR008C YIR008C::PRI1::p48 polypeptide of DNA primase 1 0.888739826  
0.794490257 0.871221881 1 0.818789529 0.842806284 0.811127354  
0.900080803 1 0.900461501 0.832237383 0.904258445 1.001288977 1  
0.878051035 0.775794342 0.717533284 0.977364647 1 0.999588226  
0.756122943 0.827515504 1.145423056 1 1.04530191 1.009085602



0.997555431 0.976836575 1.036800856 1 1.116763717 1.053849636  
 1.216067687 0.944812779 0.903477157 1 1.015535851 0.962312679  
 0.938761773 0.567029036 0.955134058 0.854609034  
 YBR063C YBR063C::YBR063C::molecular\_function unknown 1 1.034058174  
 0.747357467 0.95711909 0.878022423 1 0.830246066 0.77409913  
 0.761151675 0.914465067 1 0.70749746 0.711236236 0.660183467  
 0.978600636 0.754810666 0.604659147 1 0.822672369  
 0.987190776 0.917639778 0.760775499 1.135807099 1  
 0.904837562 0.902050881 0.7929358 0.869662986 0.9245648 1  
 0.82955902 0.780778724 0.946400998 0.473849639 1.076340661 0.626946802  
 YGL013C YGL013C::PDR1::general positive regulator of permeability genes 1  
 0.690176305 0.722855315 1.062586925 0.773742984 1 0.926386619  
 1.02718637 0.791379885 0.881086857 1 0.878187182 0.98915722  
 0.588506926 0.941629912 1 1.018663772 1.059087134 1.193670697  
 1.106388057 1 0.71235986 1.205704251 0.881846413 0.875787503 1  
 0.872092404 1.006687167 0.837479769 0.643900992 0.761789017 1  
 1.343231391 1.114510615 1.572293988 0.900671567 0.719606969 1  
 1.328114907 1.41499224 0.979084769 0.85445377 1.162500352 0.922032049  
 YIR022W YIR022W::SEC11::signal peptidase subunit 1 1.336129811  
 1.319491981 0.947373249 1.403789488 1 0.935207055 0.936499256  
 1.469673114 1.375988394 1 1.200340293 1.28065171 1.842759153  
 1.202338296 1 1.284968901 0.937192069 1.099062075 1.239475493 1  
 2.135486576 1.974543268 2.016006089 1.427318933 1 1.346663928  
 1.457420284 1.108297937 1.1318294 1.024524946 1 1.011341666  
 1.393360619 1.325660915 0.965845383 1.400507039 1 1.062288095  
 1.548897967 0.984047584 1.261618265 1.217245807 1.386988408  
 YBR065C YBR065C::ECM2::ExtraCellular Mutant 1 0.802220104 0.708162324  
 0.961811487 0.700802745 1 0.821776226 0.913105777 0.755082673  
 0.745951231 1 0.953543508 0.898491227 0.727624542 0.985826764 1  
 0.974075863 0.989036221 1.252131029 0.895633775 1 0.954603144  
 1.074176999 0.962254763 1.059388913 1 0.874726665 0.847386492  
 0.9283119 0.938302837 1.065639841 1 1.218430293 0.859592594  
 1.056469629 1.083602679 0.580024671 1 1.012156141 0.65046236  
 0.904013769 0.401620259 0.703102581 0.852857756  
 YGL015C YGL015C::YGL015C::molecular\_function unknown 1 2.157006151  
 2.1081928 1.631972148 2.958783173 1 1.653853329 1.521792454  
 2.24058171 1 1.496534105 1.230484708 1.974261782 1.442221616 1  
 0.552658408 0.523652382 0.379931022 0.541337659  
 1 0.755477297 0.593770726 0.818712318 0.801861334 1  
 0.708641239 0.667179491 0.603763436 0.613534102 1.16266923 1  
 0.857350631 0.922650193 0.974056856 1.592333046 1.044645916 0.980698884  
 YIR024C YIR024C::GIF1::G1 Factor needed for normal G1 phase  
 0.640269217 1.037463213 1.164973166 0.710697351 0.841360582  
 1.133708817 1.021170307 1.080986727 1.557698413 1.097446719 1  
 1.300987497 1.416783704 1.702215525 1 2.105202907 2.56178804  
 3.129302549 1.771578446 1 0.954052954 1.192520638 0.745662885  
 1.072331056 1 1.189022881 1.678182708 1.476407031 1.591570039  
 2.404447508 1 1.284385612 1.342910361 1.171988211 0.301158647  
 1.586473706 1.400998421  
 YGL017W YGL017W::ATE1::arginyl-tRNA-protein transferase 1 1.124919976  
 1.125446163 1.303684786 1.141413546 1 1.149415064 1.1940335  
 1.05589586 1.145016772 1 1.133169383 0.960784056 0.936161509  
 1.146583104 1 0.973748922 0.472459357 0.650118073 0.938358934 1  
 1.581079575 1.319825522 0.823766374 0.875640944 1 0.968866625  
 0.871725413 0.930445502 0.941848796 0.910740819 1 1.097048624  
 0.842339577 1.098956586 0.88271583 0.885527751 1 0.95412282  
 0.948756718 0.906559321 1.017751054 0.902038161 0.637454259

|             |                                                                    |                         |
|-------------|--------------------------------------------------------------------|-------------------------|
| YIR026C     | YIR026C::YVH1::nitrogen starvation-induced protein phosphatase     | 1                       |
| 0.877872062 | 0.690678863 0.662810213 1 0.66277444 0.549809932                   |                         |
| 1.075935817 | 1 0.859580789 0.436944529 0.394219558 1.135286392 1                |                         |
| 0.367897307 | 0.155002678 0.419799297 1 0.712586016 0.370703331                  |                         |
| 0.263728164 | 0.699085823 1 1.124551579 0.806346855 1.044103909                  |                         |
| 0.993803666 | 1 1.187505675 0.91041205 0.997555025 1.33463265                    |                         |
| 1.080510098 | 1 0.940717837 0.694761666 0.943416282 0.533393246                  |                         |
| 0.415114149 | 0.775802844                                                        |                         |
| YGL019W     | YGL019W::CKB1::beta (38kDa) subunit of casein kinase II (CKII)     | 1                       |
| 1.081122162 | 1.186745421 1.101862769 1.157655076 1 1.093076465                  |                         |
| 0.991647598 | 1.255646481 1.339425084 1 1.158195057 1.279486978                  |                         |
| 1.481153462 | 1.125328425 1 1.120411445 0.986605858 0.920471378                  |                         |
| 1.169242341 | 1 1.326619418 1.629819156 1.645592497 1.084981335 1                |                         |
| 0.957828942 | 1.143723481 1.080100636 0.926551648 0.966333949 1                  |                         |
| 1.37992802  | 1.523127772 1.343905877 0.904861506 0.987199073 1                  |                         |
| 1.335938845 | 1.21258353 1.076325931 1.273637093 0.98977514 1.302928543          |                         |
| YIR028W     | YIR028W::DAL4::allantoin transport                                 | 1.017043031 0.882583923 |
| 1.284749808 | 1.12803826 1.125035599                                             |                         |
| 1.044077308 | 0.976272768 1.183757371 1.363731684 1 0.882627761                  |                         |
| 1.501413581 | 1 1.312925166 2.065420765 1.000885868                              |                         |
| 0.824679321 | 0.84642154 1.019068735 1 1.118341752                               |                         |
| 1.443159531 | 1.765335396 0.94676342                                             |                         |
| 0.967024669 | 0.985077                                                           |                         |
| YGL033W     | YGL033W::HOP2::HOmologous Pairing                                  | 1 1                     |
| 0.879664269 | 0.978475695 1.441815658 1.120053072 1 1.503309534 1.325429023 1    |                         |
| 1           | 1 1.208972943 0.993405546 1.10056012 1.10997796 0.763109501        |                         |
| 0.954647176 | 0.896695501 0.87142238 0.914709459 1.10997796 1.109270822 1        |                         |
| 1.075340261 | 0.867932084 1.050850233 1.113063414 1.038635282 0.999073118 1      |                         |
| YIR030C     | YIR030C::DCG1::Product of gene unknown                             | 1 1.142286241           |
| 1.345676231 | 1 0.894617141 1.228488987 1.275977589 1                            |                         |
| 0.945651321 | 1.138826914 1.268606751 1 0.851497622                              |                         |
| 1.302693724 | 1.343368154 1 1.335878462 2.248825188 1.165700459                  |                         |
| 1.243196348 | 1 0.980918159 1.292046111 0.905534576 0.82009246                   |                         |
| 0.976264658 | 1 1.09610981 1.767220211 1.568429464 1.702005942                   |                         |
| 2.313188801 | 1 1.549417627 1.908578748 1.442912193 1.424002852                  |                         |
| 2.080441812 | 1.166331183                                                        |                         |
| YGL035C     | YGL035C::MIG1::Transcription factor involved in glucose repression | 1                       |
| 1           | 0.622360493 0.750740241 0.789649865 0.632818505 1 0.775735149      |                         |
| 0.799150674 | 0.651796084 0.64479578 1 0.50038895 0.683722254                    |                         |
| 0.820265693 | 0.781282022 1 0.977878783 0.890488516 1.188456263                  |                         |
| 1.268446482 | 1 0.743283414 0.89124661 1.109699463 0.781824751 1                 |                         |
| 0.834916658 | 0.953418224 0.954064706 0.879881454 0.992056397 1                  |                         |
| 0.63771083  | 0.796092344 1.012864275 0.803300542 0.811038651 1                  |                         |
| 1.135455979 | 0.775272974 1.047886416 1.086591899 0.819584055                    |                         |
| YGL037C     | YGL037C::PNC1::NAD(+) salvage pathway gene                         | 1 0.790535639           |
| 1.71726845  | 1.547036766 1.541666768 1 1.377747984 1.871440677                  |                         |
| 1.833206732 | 1.604491957 1 1.132045301 2.341486199 4.944853956                  |                         |
| 1.374287771 | 1 4.177059787 5.154574797 7.423982311 7.360554977 1                |                         |
| 4.193241632 | 4.469983422 10.70104384 4.415070423 1 1.099902286                  |                         |
| 1.729955265 | 1.740628968 0.661124002 1.115811702 1 1.828179293                  |                         |
| 2.353450635 | 3.523850904 1.906914356 1.296518253 1 2.503624003                  |                         |
| 2.414932177 | 1.676595194 1.336704146 2.207251746 1.17421175                     |                         |
| YGL039W     | YGL039W::YGL039W::molecular_function unknown                       | 1 1.166847235           |
| 0.968121653 | 1.044044714 1.147730106 1 1.204310473 0.996889306                  |                         |
| 0.87479104  | 1.163388987 1 1.70120077 4.433236223 4.05914135                    |                         |
| 3.513183256 | 1 0.941519608 0.968087746 0.900255615 1.074351855 1                |                         |

0.969803726 0.741241758 0.892037687 0.781092295 1 1.508091409  
 2.324750435 2.503646311 1.390200819 1.581280668 1 1.562343368  
 3.010959832 4.393188046 1.332563694 1.150495364 1 1.996022796  
 3.189177663 1.726442614 1.664925215 0.846560524 1.594511286  
 YBR079C YBR079C::RPG1::Exhibits significant sequence similarity with a  
 subunit of the mammalian translation initiation factor 3 1 0.844603799  
 0.517578192 0.483498549 1 0.920791663 0.998401097 0.47634248  
 0.607578398 1 0.795621894 0.6332689 0.342829675 0.734905257 1  
 0.686523302 0.798645566 0.390464785 0.426747306 1 0.393246366  
 0.512930599 0.344872946 0.477451726 1 0.929213464 0.690209078  
 0.759910021 0.954686714 0.950067688 1 0.819408771 0.433573769  
 0.51938783 0.597667087 0.344963378 1 0.715857752 0.434708953  
 0.847946413 0.427753618 0.541222264 0.721514177  
 YBR081C YBR081C::SPT7::Transcription factor 1 1.019719301 1.014151679  
 0.914035105 0.797402582 1 0.93545343 1.027370374 0.873977777  
 0.900578656 1 1.036062067 1.070748449 1.171577565 0.905203933 1  
 1.0676928 0.832139017 0.897082241 0.867836147 1 1.0549494  
 1.321444733 1.049712695 0.995575972 1 0.947033114 0.83403897  
 0.997208898 1.021200541 1.130330228 1 0.812239405 0.68602055  
 0.886010666 0.873488716 0.572932305 1 0.797908599 0.772276576  
 1.179525347 0.842256413 0.77610979 0.845852802  
 YBR083W "YBR083W::TEC1::transcription factor of the TEA/ATTS DNA-binding  
 domain family, regulator of Ty1 expression" 0.949322311 0.965717653  
 1.067829411 0.928062626 0.98795403 1.062135402 0.922186053  
 0.779347364 0.684798998 0.882135969 0.661408338 0.670607467 1  
 1.335027462 0.813484001 0.732500393 1 0.415065407 0.506630112  
 1 0.796676047 0.663406409 0.74224014 1  
 0.757670167 0.948570885 0.90847315 0.784652685 1.304228687 1  
 0.825618904 0.88345336 0.649118527 0.68386236  
 YBR084W YBR084W::MIS1::mitochondrial C1-tetrahydroflavate synthase 1  
 0.996074901 0.74343553 1.023790656 0.511565467 1 1.009877946  
 0.9931442 0.629799183 0.583279947 1 0.982667826 0.670349039  
 0.162896781 0.929934649 1 0.868389549 0.277239448 0.496722814 1  
 0.43412144 0.576820549 0.796288098 1 0.93046339 0.607907215  
 0.825413012 1.340295502 0.882378521 1 0.795138581 0.43362117  
 0.450986747 0.460759005 0.336272968 1 0.666709619 0.450235582  
 0.657465258 0.572863359 0.431134221 0.524498756  
 YJL002C YJL002C::OST1::Oligosaccharyltransferase catalyzes the transfer of  
 oligosaccharide from dolichol-oligosaccharide donor to consensus glycosylation  
 acceptor sites (asparagines) in newly synthesized proteins in ER lumen 1  
 0.77924903 0.572540798 0.773780113 0.549436473 1 0.783742706  
 0.74855347 0.624337142 0.693762311 1 0.810552389 0.712498622  
 0.570601268 0.661396077 1 1.638141385 0.192893443 1.36751694  
 0.630679413 1 0.931245696 0.390102347 0.443133878 0.668403997 1  
 0.982163178 0.965133865 1.015732436 1.339309205 0.929897739 1  
 0.857259246 0.820877272 0.708790083 0.556324097 0.388658241 1  
 0.952072326 0.759958002 0.903414199 0.667182216 1.002502141 0.743404756  
 YBR086C YBR086C::IST2::Similar to calcium and sodium channel proteins 1  
 1.089193144 0.708809403 1.018686533 0.586468658 1 1.037096192  
 1.104081399 0.585521473 0.520546284 1 1.284113332 0.941414066  
 0.390027907 0.722056712 1 1.10312778 0.324194475 1  
 0.584493464 0.380983223 0.377831945 0.367665589 1 0.931765541  
 0.954048014 1.245045863 1.574410752 0.918477627 1 0.79374555  
 0.543914579 0.714052829 0.695804261 0.379207247 1 0.635082935  
 0.526094884 0.890687148 0.613975014 0.737173733 0.598051217  
 YJL004C YJL004C::SYS1::Multicopy suppressor of ypt6 null mutation 1  
 1.28386181 0.987397482 0.852885112 0.901220425 1 0.852989827

|             |                                                                                                                                                                                                                                                                    |             |             |             |             |
|-------------|--------------------------------------------------------------------------------------------------------------------------------------------------------------------------------------------------------------------------------------------------------------------|-------------|-------------|-------------|-------------|
| 0.833682691 | 0.971858161                                                                                                                                                                                                                                                        | 1           | 1.175568977 | 0.982656628 | 1.028558099 |
| 0.941702647 | 1                                                                                                                                                                                                                                                                  | 1.110627233 | 0.430320294 | 0.891489889 | 1.077967191 |
| 1.439611036 | 0.882040996                                                                                                                                                                                                                                                        | 1.455642677 | 1.244122068 | 1           | 1.253095897 |
| 1.017120253 | 1.386364287                                                                                                                                                                                                                                                        | 1.409487332 | 1.221409314 | 1           | 0.810422627 |
| 0.894326809 | 0.840022034                                                                                                                                                                                                                                                        | 0.61362641  | 0.849636699 | 1           | 1.005839381 |
| 0.86491459  | 0.964547003                                                                                                                                                                                                                                                        | 0.766364068 | 1.026872921 | 1.20135611  |             |
| YBR088C     | "YBR088C::POL30::Accessory factor for DNA polymerase delta, mRNA increases in G1, peaks in S in mitosis, & increases prior to DNA synthesis in meiosis; required for DNA replication & repair, required for viability in cdc44, rad50, rad52 or rad57 backgrounds" |             |             |             |             |
|             | 1.007359144                                                                                                                                                                                                                                                        | 0.629578537 | 0.609602018 | 0.948685707 | 1.004850073 |
|             | 0.717351074                                                                                                                                                                                                                                                        | 0.896944005 | 1.122991956 | 1.634911588 | 1           |
|             | 0.465808479                                                                                                                                                                                                                                                        | 1.790709334 | 1           | 0.795215269 | 0.591647159 |
|             | 1.96422839                                                                                                                                                                                                                                                         | 1           | 0.911743325 | 0.876191053 | 1.035006714 |
|             | 1.112853254                                                                                                                                                                                                                                                        | 1           | 0.989587507 | 1.607424237 | 1.027926798 |
|             | 1.049606147                                                                                                                                                                                                                                                        | 1           | 1.123367464 | 1.155917152 | 0.954042216 |
|             | 0.981631695                                                                                                                                                                                                                                                        | 1.677695592 |             |             | 1.211731124 |
| YJL006C     | YJL006C::CTK2::cyclin-related subunit of the kinase complex that phosphorylates the RPO21 CTD (carboxy-terminal domain); also called CTDK-I beta subunit                                                                                                           |             |             |             |             |
|             | 1                                                                                                                                                                                                                                                                  | 0.720091738 | 0.693505139 | 0.817245128 | 1           |
|             | 0.632956315                                                                                                                                                                                                                                                        | 0.906978259 | 1           | 0.625284417 | 0.630114562 |
|             | 0.944577747                                                                                                                                                                                                                                                        | 1           | 1.083348237 | 2.131610915 | 1.44029766  |
|             | 0.46450262                                                                                                                                                                                                                                                         | 0.86773797  | 0.438114999 | 1           | 1.019697543 |
|             | 1.126283123                                                                                                                                                                                                                                                        | 1.068144241 | 1.185089217 | 1           | 0.808008542 |
|             | 0.86748268                                                                                                                                                                                                                                                         | 0.969584397 | 1.151582642 | 1           | 0.945109284 |
|             | 1.020316451                                                                                                                                                                                                                                                        | 1.124126091 | 1.127886909 | 1.184719311 |             |
| YBR101C     | YBR101C::YBR101C::molecular_function unknown                                                                                                                                                                                                                       |             |             |             |             |
|             | 1.078460676                                                                                                                                                                                                                                                        | 0.827228833 | 0.843877448 |             | 0.919771363 |
|             | 0.94280423                                                                                                                                                                                                                                                         | 1.363397249 | 1.187263094 | 0.973115083 | 0.77686927  |
|             | 0.745412052                                                                                                                                                                                                                                                        | 0.543665998 | 0.967259446 | 1           | 1.361898186 |
|             | 1.438253669                                                                                                                                                                                                                                                        | 0.940093147 | 0.807532079 | 1.141861714 | 1           |
|             | 1.085264911                                                                                                                                                                                                                                                        | 0.705438381 | 0.751582238 | 1.064447506 | 1           |
|             | 0.858350539                                                                                                                                                                                                                                                        | 0.70461176  | 0.953351791 | 0.660164585 | 1.274032958 |
| YGL041C     | YGL041C::YGL041C::molecular_function unknown                                                                                                                                                                                                                       |             |             |             |             |
|             | 1.153622647                                                                                                                                                                                                                                                        | 0.767048144 | 1.317692231 | 0.845088161 | 0.828180037 |
|             | 1.23753134                                                                                                                                                                                                                                                         | 1.11016733  | 0.75352     | 1.02915863  | 1.299445379 |
|             | 0.858573328                                                                                                                                                                                                                                                        | 1           | 1.14960819  | 0.672087377 | 0.818885165 |
|             | 2.270054234                                                                                                                                                                                                                                                        | 3.04819202  | 2.515106742 | 1.11039479  | 1           |
|             | 1.219884854                                                                                                                                                                                                                                                        | 0.632083088 | 0.873512124 | 1           | 1.151787148 |
|             | 1.292023704                                                                                                                                                                                                                                                        | 0.954675142 | 1.705752933 | 1           | 1.41603245  |
|             | 1.154576722                                                                                                                                                                                                                                                        | 1.995051034 | 1.498141658 | 1.356341598 | 1.346361796 |
| YJL008C     | YJL008C::CCT8::Required for assembly of microtubules and actin in vivo                                                                                                                                                                                             |             |             |             |             |
|             | 1                                                                                                                                                                                                                                                                  | 0.63372464  | 0.595334824 | 0.875054662 | 0.527592954 |
|             | 0.744202074                                                                                                                                                                                                                                                        | 0.673710931 | 0.69316061  | 1           | 0.68646943  |
|             | 0.48812772                                                                                                                                                                                                                                                         | 0.731464486 | 1           | 0.874489126 | 0.74163386  |
|             | 0.590754702                                                                                                                                                                                                                                                        | 1           | 1.041125974 | 0.639083293 | 0.111907844 |
|             | 0.850150315                                                                                                                                                                                                                                                        | 0.952154944 | 1.196118592 | 1.000028466 | 0.729344983 |
|             | 1.143515964                                                                                                                                                                                                                                                        | 0.872119356 | 0.977818347 | 0.674359315 | 0.977155705 |
|             | 1.075699864                                                                                                                                                                                                                                                        | 0.813942369 | 0.85373526  | 0.569455773 | 0.39065185  |
| YBR103W     | YBR103W::SIF2::Sir4p-Interacting Factor                                                                                                                                                                                                                            |             |             |             |             |
|             | 1                                                                                                                                                                                                                                                                  | 0.695831749 |             |             |             |
|             | 0.739091337                                                                                                                                                                                                                                                        | 0.834643691 | 1           | 0.705903107 | 0.7298423   |
|             | 0.815224585                                                                                                                                                                                                                                                        | 1           | 0.799143276 | 0.853549299 | 0.857752383 |
|             | 0.743953203                                                                                                                                                                                                                                                        | 1.053687858 | 1           | 1.239613191 | 0.640403606 |
|             | 1.258788048                                                                                                                                                                                                                                                        | 1           | 0.99422204  | 1.174778137 | 1.044322323 |
|             | 1.170231428                                                                                                                                                                                                                                                        | 1           | 1.006280687 | 1.145291534 | 1.26556197  |
|             | 1.122120594                                                                                                                                                                                                                                                        | 1           | 0.988117404 | 1.037902682 | 1.113961521 |
|             | 1.006696461                                                                                                                                                                                                                                                        | 1.146191829 |             |             | 1.132989974 |
|             |                                                                                                                                                                                                                                                                    |             |             |             | 0.925853694 |
|             |                                                                                                                                                                                                                                                                    |             |             |             | 1.179000806 |
|             |                                                                                                                                                                                                                                                                    |             |             |             | 1.176935063 |
|             |                                                                                                                                                                                                                                                                    |             |             |             | 1.179000806 |
|             |                                                                                                                                                                                                                                                                    |             |             |             | 0.966671972 |

YGL043W YGL043W::DST1::Transcription elongation factor S-II<br>Meiotic DNA recombination factor 1 0.886217585 1.052104887 1.039558804 1.099462342 1 0.900980018 0.968622926 0.974356528 0.870007281 1 0.870107287 0.881113988 0.831944483 0.871939272 1 0.777382662 0.69623281 0.671843226 0.940195692 1 1.168861585 0.919475816 1.05613483 1.039092854 1 1.098340513 1.085502528 1.004134884 0.945082668 1.067194972 1 1.237157864 1.138787923 1.044887769 0.979937777 1.221352124 1 0.945960218 1.048128525 1.036560173 1.175133354 0.873068731 1.04199261

YJL010C YJL010C::YJL010C::molecular\_function unknown 1.04043755 0.729982307 1.288104137 0.743037474 0.985532605 0.902870033 0.855937117 0.835103555 1.12485469 0.838769563 0.43120084 1.289328544 1 0.86557769 0.920892689 0.640139347 0.565375164 1 0.391209348 0.328084187 0.336181899 0.563491964 1 0.857849395 0.780532935 0.813211063 0.92899875 0.876448833 1 1.051784342 0.824030247 1.051145858 1.787900892 1.234895778 1 0.687460917 1.202208986 1.444293561 0.758579848 0.786310354

YBR105C YBR105C::VID24::also involved in vacuolar protein targeting 1 1.373409767 1.215038384 1.289787856 1 1.279911718 1.116649954 1 1.214861797 1.011668705 1.007496871 1.375538053 1 1.132617119 0.988061612 1 1.148791292 1.239114851 1.211303598 1.146651122 0.95036754 1 1.471142431 2.009498686 2.159668563 2.032208328 2.139147975 1 1.683456806 1.798226467 1.269561602 1.386050435 2.408681235 1.045495061

YGL057C YGL057C::YGL057C::molecular\_function unknown 1 1.342544133 1.212026462 1.216529456 1.706722999 1 1.143632119 1.128636102 1.564048079 1.356856265 1 0.961637206 1.069300943 1.45419942 1.160270508 1 1.020708044 0.798334811 1.334513496 1.682816973 1 0.843105689 1.97529848 1.360225946 0.999768045 1 0.945310195 1.031981641 0.726357312 0.754885637 0.841613336 1 0.892558412 1.164125004 0.921211447 0.840278133 1.121271855 1 1.301218094 1.196340279 1.89233541 1.535110604 1.144440604

YJL012C YJL012C::VTC4::Phosphate metabolism; transcription is regulated by PHO system 1 0.83395491 1.071605157 0.501373522 1 0.967709009 1.026867279 0.560130606 0.692759559 1 0.890564036 0.953591182 0.52233725 1.082870291 1 0.607594734 0.621361721 0.583619897 0.418523462 1 0.729312242 0.265244407 0.272523666 0.577829028 1 0.847448169 0.76570637 1.102758828 1.270278067 1.088993109 1 0.842266952 0.496373096 0.83304225 0.761912838 0.283951108 1 0.912292325 0.568314404 1.037622995 0.48485704 0.646876574 0.719762951

YBR107C YBR107C::IML3::Increase Minichromosome Loss 1 1.560079606 1.267975367 1.039039704 1 1.189719155 1.047249712 0.994154155 1.01617819 1 1.085220301 1.221990423 1.041546691 1 0.969477153 0.889470644 0.951779669 1 0.821831472 1 1.139162255 0.962912665 1 0.919690454 0.965670272 0.939646806 1.068932958 1.142332534 1 0.968694913 0.750380505 0.837380955 0.329216903 0.886644711 0.852857756

YGL059W YGL059W::YGL059W::molecular\_function unknown 1 1.025500836 1.154773825 1.165213571 1 1.107382293 1.109967562 0.990668562 1 2.367321084 1.48958904 1.064100312 1.113844335 1 1.07387903 0.612149174 1.021527943 1.112015612 1 1.255852931 1.998898423 2.23072592 1.114422436 1 1.194955629 1.101793315 0.940836151 1 1.521133959 1.174923201 1.340561805 1.196368078 1.098556493 1 1.606254289 1.220357442 1.460355534 1.155465842 1.594788789 1.86332789

YJL026W YJL026W::RNR2::small subunit of ribonucleotide reductase 1 1.023840276 0.65102841 0.82873911 0.616786334 1 0.863477534 0.794770182 0.601723905 0.74100583 1 1.085407373 0.767882768

0.586749187 1.018344449 1 0.929506737 0.655415549 0.629766991  
0.957625052 1 0.795090159 0.393684812 0.422267981 0.973145929 1  
1.17331636 1.053999813 1.399380996 1.853103332 1.167854463 1  
1.35885314 1.36177658 2.397941461 3.302996611 1.050996861 1  
1.475585721 1.45035719 1.089326922 1.049197851 1.094321693 0.810827823  
YGL061C YGL061C::DUO1::Death Upon Overexpression 1 0.89748763  
1.141673674 0.958424021 1.404126618 1 0.825566548 1.035396806  
1.166866978 1.341450602 1 0.752510253 0.82523411 0.956680264  
1.153039593 1 0.644202331 0.416729287 0.874039207 1  
1.049690751 0.938354889 0.88266504 0.883516362 1 0.863934359  
0.9492218 0.657333661 0.702412579 1.03058202 1 1.00443364  
1.303354061 1.174727446 1.290162154 1.415161759 1 1.066311806  
0.954038021 1.084796946 1.43643595 1.186533961 4.313323928  
YJL028W YJL028W::YJL028W::molecular\_function unknown 1.013349218  
0.825270862 1.000061298 0.909460306 0.879708433  
1.209248921 1.106632033 1.491979284 0.44115939  
0.390584929 1 0.807065468 1.012949316 1 1.07369679  
0.931181755 0.989919014 1.283435605 1.297181827 0.608513  
0.85138766 0.923709 1 0.74782283 0.603684523  
0.281056374 0.913040194 0.732897299  
YGL063W YGL063W::PUS2::pseudouridine synthase 2 1 1.155086479  
1.011287381 0.85343683 0.754901786 1 1.150071671 1.058459535  
0.832992573 0.903100656 1 0.969399929 1.081324338 1.035727163 1  
0.805629934 0.989380365 1 0.707825781 1.313385339  
0.922273899 1 1.139468895 1.143416492 1.18682406 1.485409056 1  
0.768991346 0.752639363 0.896653137 0.921446438 0.662184204 1  
0.859439384 0.717528182 0.772543542 0.812220249 0.817097998  
YJL030W YJL030W::MAD2::spindle checkpoint complex subunit 1  
0.975410397 1.111997348 1.127905149 1.174482648 1 0.955867065  
0.932170931 1.141520707 1 1.018326923 1.142346398 1.247919485  
1.142905503 1.570117926 0.778419213  
0.759906667 1 0.976915333 1.408982238 0.798094005 1.121164986 1  
1.385364396 1.683236737 1.624432344 1.404724623 1.161357237 1  
1.226818099 1.493330631 1.203905493 0.780533262 1.227430985 1.186470537  
YJL032W YJL032W::YJL032W::molecular\_function unknown 1 0.933295762  
1.547492451 1.163436712 1.455752965 1 0.929392294 0.932462591  
1.672638547 1.471922623 1 1.138158222 1.709876679 2.443071154  
1.270942792 1 1.41852882 1.40302578 1.639816731 1.807850686 1  
3.105796563 4.689442766 5.121501538 2.37343543 1.006592235  
1.384283057 0.817353749 0.585611193 0.91572652 1 1.243794174  
2.204875326 1.592951442 1.250344717 2.108744425 1 1.524343169  
2.520036341 1.375580038 0.403292789 2.047524913 1.831805415  
YGL065C YGL065C::ALG2::glycosyltransferase 1 1.065399517 1.058081208  
1.053602545 1.031567397 1 1.075824701 1.007157329 0.943756592  
0.982963796 1 1.038314811 1.035242195 0.744730674 1.058370166  
1.240644377 0.987898747 0.912368277 1.276277435 1 0.96724428  
0.790963726 0.783293327 0.731340918 1 1.145139424 1.01254374  
1.327658514 1.112330817 1.161402732 1 1.121646642 0.767654222  
1.148288017 0.787253356 0.562765 1 1.011496952 0.71983373  
0.742551128 0.8824005 0.764532595 3.168007659  
YGL067W YGL067W::NPY1::hydrolyzes the pyrophosphate linkage in NADH and  
related nucleotides 1 0.941428167 0.864159453 0.906511995 0.865463134 1  
0.984563347 0.93845201 1.027256432 0.954491273 1 0.873139379  
0.922008807 0.911765526 0.917909804 1 1.168454579 1.842900988  
1.749613366 0.724314328 1 0.573961042 0.543058656 0.468470119  
0.493210366 1 1.211152125 1.241756932 1.348105015 1.240775376 1

|         |                                                                                                                               |             |             |             |             |             |             |
|---------|-------------------------------------------------------------------------------------------------------------------------------|-------------|-------------|-------------|-------------|-------------|-------------|
|         | 0.925149437                                                                                                                   | 1.126940182 | 0.843531176 |             | 0.830193259 | 1           | 0.8961995   |
|         | 0.907646508                                                                                                                   | 0.844614134 | 0.950395395 | 0.884465386 | 0.910648927 |             |             |
| YGL081W | YGL081W::YGL081W::molecular_function                                                                                          | unknown     |             |             |             | 1           | 1.343532825 |
|         |                                                                                                                               | 1           | 1.568034152 | 1.583081232 |             | 2.162742369 | 1           |
|         | 1.319637279                                                                                                                   | 1.898398344 | 2.150976306 | 1.728810214 |             | 0.802277181 |             |
|         | 0.995213063                                                                                                                   | 0.76054031  | 1           | 1.246803903 | 1.557773117 | 1.837371202 |             |
|         | 1.068007112                                                                                                                   | 1           | 0.878277203 | 1.138609217 | 0.783345239 | 0.779714088 |             |
|         | 0.917710363                                                                                                                   | 1           | 0.728919422 | 0.838045485 | 1.104707794 | 1.083203319 |             |
|         | 0.765563203                                                                                                                   | 1           | 1.007550083 | 1.044232886 | 1.22254854  | 1.157911878 |             |
|         | 1.524201064                                                                                                                   | 2.251229391 |             |             |             |             |             |
| YGL083W | YGL083W::SCY1::Suppressor of GTPase mutant                                                                                    |             |             |             |             | 1           | 0.751232197 |
|         | 0.77743275                                                                                                                    | 0.837949267 | 0.832368166 | 1           | 0.992530635 | 1.00163056  |             |
|         | 0.705544306                                                                                                                   | 0.67505513  | 1           | 0.837913466 | 0.849446429 | 0.48407007  |             |
|         | 0.805396499                                                                                                                   | 1           | 1.153628742 | 0.635735438 | 1.349689957 | 0.736009227 | 1           |
|         | 1.023590308                                                                                                                   | 1.519848908 | 0.494894924 | 0.804514936 | 1           | 0.995655675 |             |
|         | 1.064780981                                                                                                                   | 0.984981171 | 1.067720373 | 0.90853907  | 1           | 0.936716648 |             |
|         | 0.635992113                                                                                                                   | 0.728311082 | 0.838468055 | 0.642042632 | 1           | 0.881444628 |             |
|         | 0.816518146                                                                                                                   | 1.041950277 | 0.86153293  | 0.861178906 | 0.906270811 |             |             |
| YBR109C | YBR109C::CMD1::master regulator of calcium mediated signalling                                                                |             |             |             |             |             | 1           |
|         | 0.998248707                                                                                                                   | 0.816543075 | 0.865649134 | 0.824882284 | 1           | 0.874911913 |             |
|         | 0.820493365                                                                                                                   | 0.773678873 | 0.843102539 | 1           | 0.948069271 | 0.92097652  |             |
|         | 0.944112736                                                                                                                   | 0.844168218 | 1           | 1.05956418  | 0.945318951 | 0.857151269 |             |
|         | 0.946357059                                                                                                                   | 1           | 0.936336927 | 0.611162431 | 0.644108981 | 0.882481871 | 1           |
|         | 1.192914688                                                                                                                   | 1.18027531  | 1.045597647 | 0.985159606 | 1.10460952  | 1           |             |
|         | 1.055821498                                                                                                                   | 1.744866303 | 1.253271062 | 1.05911929  | 1.392187986 | 1           |             |
|         | 1.067867613                                                                                                                   | 1.389369124 | 0.869435979 | 1.038225066 | 1.091512206 | 1.372102836 |             |
| YBR111C | YBR111C::YSA1::Protein with weak homology to D. melanogaster serendipity protein and X. laevis basis fibroblast growth factor |             |             |             |             |             |             |
|         | 0.675976594                                                                                                                   | 0.829059487 | 0.807301415 | 0.982884826 |             | 0.629578537 |             |
|         | 0.716145075                                                                                                                   |             | 1.162206417 |             | 0.630545538 | 0.873674216 | 1.304119722 |
|         | 1.041644306                                                                                                                   | 1           | 1.118037825 | 1.231212802 | 1.234443521 | 1.626612255 | 1           |
|         | 1.853006117                                                                                                                   | 1.740838413 | 3.651015572 | 2.714489956 | 1           | 1.222240777 |             |
|         | 1.333026287                                                                                                                   | 1.395030448 | 0.963514992 | 1.185817856 | 1           | 1.146907419 |             |
|         | 1.954194655                                                                                                                   | 1.939395786 | 1.735367854 | 1.924291705 | 1           | 1.243323712 |             |
|         | 1.319789014                                                                                                                   | 1.29334836  | 1.333562363 | 1.798056376 | 1.393993415 |             |             |
| YBR125C | YBR125C::PTC4::Phosphatase type Two C                                                                                         |             |             |             |             | 1           | 0.934601023 |
|         | 0.674145572                                                                                                                   | 1.219504535 | 0.687453319 | 1           | 1.058642173 | 1.073123732 |             |
|         | 0.782100353                                                                                                                   | 0.670417031 | 1           | 1.270954016 | 1.23433165  | 0.479669978 |             |
|         | 1.110907443                                                                                                                   | 1           | 1.161090189 | 1.43493864  | 1.010427059 | 0.564208701 | 1           |
|         | 0.402783577                                                                                                                   | 0.351959059 | 0.269423172 |             |             | 1.121859541 |             |
|         | 0.923437938                                                                                                                   | 0.94143792  | 0.865969133 | 1           | 1.113785261 | 1.159325389 |             |
|         | 1.230379384                                                                                                                   | 0.929487602 |             | 1.190817223 | 0.820308208 | 0.897756952 |             |
|         | 0.581141736                                                                                                                   | 0.721150948 | 0.896639019 |             |             |             |             |
| YBR127C | "YBR127C::VMA2::vacuolar H-ATPase regulatory subunit (subunit b), 60 kDa subunit of V1 sector"                                |             |             |             |             | 1           | 1.225079999 |
|         | 0.841354747                                                                                                                   | 1           | 1.248902706 | 1.202720199 | 0.857964325 | 1.08351367  | 1           |
|         | 1.141197609                                                                                                                   | 1.086516349 | 0.937681798 | 1.195190374 | 1           | 1.448822638 |             |
|         | 1.250003659                                                                                                                   | 1.207729261 | 0.702658226 | 1           | 0.514691259 | 0.519686552 |             |
|         | 0.382684402                                                                                                                   | 0.495397618 | 1           | 1.026486468 | 0.929473468 | 1.390070682 |             |
|         | 1.430677763                                                                                                                   | 0.887909026 | 1           | 0.875974117 | 0.833450421 | 1.059187349 |             |
|         | 0.965760042                                                                                                                   | 0.608485516 | 1           | 1.0807171   | 0.74895579  | 1.017279792 |             |
|         | 0.723017009                                                                                                                   | 0.954812457 | 0.724141067 |             |             |             |             |
| YJL034W | YJL034W::KAR2::Involved in translocation of nascent polypeptides across the ER membrane                                       |             |             |             |             | 1           | 0.871948957 |
|         | 0.864490382                                                                                                                   | 0.998457833 | 0.641073623 | 0.617652168 | 1           | 0.819311644 |             |
|         | 0.818043796                                                                                                                   | 0.632214171 | 0.634431462 | 1           | 1.993771181 | 1.883341363 |             |
|         | 2.967905105                                                                                                                   | 1.546758729 | 1           | 0.803403597 | 0.36905273  | 0.57904936  |             |

1.130117052 1 1.196251594 1.030817457 1.163859856 0.98608579  
0.863951347 1 1.739888292 1.156362363 0.585066909 0.487311184  
0.409956763 1 1.621180191 1.089386266 0.607634931 0.750806963  
0.742984014 0.829215951  
YBR129C YBR129C::OPY1::imparts Far- phenotype 0.988723428  
1.015825678 0.971668894 1.232521916 0.92499619 0.78094963  
1.160682463 0.90201091 0.676359539 0.80386491 0.96874121  
1.012274664 1 0.734687801 0.89021311 0.733182811 1.007885232 1  
1.673673585 1.375660027 1.278966111 1.708055391 1 0.782775215  
0.843181838 0.7835353 1.052063499 1 0.748850072 1.166291459  
1.015281067 1.02138704 2.294076799 1 0.896514799 0.957252411  
0.96019173 1.050377144 1.479396331 1.400122756  
YJL036W YJL036W::SNX4::Sorting NeXin 1 0.793161905 0.878075069  
0.837943568 0.764452896 1 0.85493343 0.857699581 0.707974804 1  
1.13116097 1.238917856 0.851594257 1.056198905 1 2.095546755  
1.992878334 1.534526644 1.310329993 1 2.960836844 1.562346633  
1.927075415 2.122902424 1 1.245578442 1.822552331 1.334943469  
0.865154982 1.153191033 1 1.597307778 1.688678324 1.673033361  
1.243082774 1.212339167 1 1.420850464 1.529332127 1.189220225  
0.964770761 1.317412179 1.15144561  
YBR131W YBR131W::CCZ1::Calcium Caffeine Zinc sensitivity 1  
1.118780627 1.026708127 1.259759503 1.066036739 1 1.12150287  
1.170181101 1.082116001 1.124352225 1 1.216241404 1.358711482  
1.25734734 1.256426061 1 0.715508823 0.835664997 0.881304095 1  
1.453529666 1.456431698 1.160867276 1 0.798024129 0.792701969  
0.971746453 0.893714421 0.932806719 1 0.830687262 0.873963323  
0.914068027 1.215627414 1.059203936 1 0.869848458 0.79607931  
1.178251777 0.608256215 1.070079036 0.934290836  
YJL051W YJL051W::YJL051W::molecular\_function unknown 1 0.908991734  
0.749343548 0.974691973 0.776468314 1 0.91631292 0.976019212  
0.660314016 0.701204079 1 1.141588539 0.837140331 0.539920436  
0.766561036 1 0.94705849 0.318655827 0.745126106 0.469027083 1  
0.767293967 0.687613141 0.549639802 1 1.191704988 0.969679367  
1.063475284 1.34022013 0.950011935 1 0.97322137 0.544468162  
0.436462836 0.55396821 0.617318345 1 0.884876358 0.616350374  
0.940705097 0.76811201 0.908671208 0.75216104  
YBR133C YBR133C::HSL7::Histone Synthetic Lethal<br> Negative regulator of  
Swel kinase 1 1.278986707 1.040983248 1.232440941 0.931022958 1  
1.20872342 1.23981388 0.945065732 1.013890114 1 1.498631018  
1.219548895 0.845639007 1.16380244 1 0.839339508  
0.833654536 1 0.961276345 0.749776744 0.631828351 0.820050659 1  
0.871377349 0.794373817 0.992681841 0.977802294 0.953414756 1  
0.923288358 0.684665728 0.753614687 0.687114218 0.516599559 1  
0.765399318 0.774158519 0.987233527 0.853918158 0.914361382 0.892260903  
YGL085W YGL085W::YGL085W::molecular\_function unknown 1 1.17121564  
1.248569082 1.107141165 1.328646052 1 1.133084489 1.088867938  
1.405761158 1.297019728 1 1.005950755 1.120955449 1.288079474  
1.133416035 1 1.355755561 1.116827897 1.555031046  
0.7613652 0.754797838 0.421616604 0.583790959 1 1.028933438  
1.147527469 1.110175613 0.928175735 0.959117371 1 1.041980512  
1.144066315 0.960727764 0.705366611 1.088085157 1 1.157532718  
1.134777343 0.961461794 1.351904402 1.14666035 1.45003336  
YJL053W YJL053W::PEP8::Plays a role in delivery of proteins to the vacuole  
1 0.849331074 0.92628637 0.763447101 0.894944757 1 0.753438674  
0.82889505 0.772134616 1 1.075735583 1.051297192 1.002718234  
0.891530819 1 1.469814884 1.466892876 1.297203436 1.190309637 1  
1.569685762 1.755813329 1.434291628 1.232951791 1 1.162955778



|         |                                                                        |             |             |             |             |             |             |
|---------|------------------------------------------------------------------------|-------------|-------------|-------------|-------------|-------------|-------------|
|         | 1.438428266                                                            | 1.224932685 | 0.844828602 | 0.960137181 | 1           | 1.2994322   |             |
|         | 1.682017777                                                            | 1.489030428 | 1.121061437 | 1.394418754 | 1           | 1.308306976 |             |
|         | 1.315551554                                                            | 1.139123432 | 1.154948712 | 1.449462341 | 1.28629164  |             |             |
| YBR135W | YBR135W::CKS1::subunit of the Cdc28 protein kinase                     |             |             |             |             | 1           |             |
|         | 1.080606505                                                            | 1.070180509 | 0.8936536   | 1.009669909 | 1           | 0.95285563  |             |
|         | 1.053429122                                                            | 0.965034568 | 1           | 1.189431837 | 1.100579412 | 1.212351282 |             |
|         | 1.10836708                                                             | 1           | 1.072516063 | 1.00719082  | 0.840786592 | 0.897333316 |             |
|         | 1.222869715                                                            | 1.443888294 | 1.272633583 | 1.275260436 | 1           | 1.048079246 |             |
|         | 0.823819375                                                            | 1.217507565 | 0.835360547 | 1.583412595 | 1           | 1.273891015 |             |
|         | 1.385130232                                                            | 0.995433339 | 0.894153459 | 0.992048349 | 1           | 0.913340839 |             |
|         | 1.126721471                                                            | 1.268545455 | 1.022938854 | 0.786180683 | 0.986828225 |             |             |
| YGL087C | YGL087C::MMS2::Member of error-free postreplication DNA repair pathway |             |             |             |             | 1           |             |
|         | 1.048931816                                                            | 1.123455188 | 1.499143598 | 1.449956068 | 1           | 0.919798332 |             |
|         | 1.363610989                                                            | 1.840460125 | 1.143118938 | 1           | 1.271766971 | 1.428241947 |             |
|         | 1.202003009                                                            | 1.593614665 | 1           | 1.730929182 | 1.756925444 | 1.888955068 |             |
|         | 1.839073417                                                            | 1           | 1.158300233 | 1.327554032 | 0.94455357  | 0.84735969  |             |
|         | 1.016409308                                                            | 1           | 1.111591763 | 1.675921008 | 1.468511573 | 1.597335789 |             |
|         | 1.781959336                                                            | 1           | 1.039852423 | 1.409834258 | 1.20789909  | 1.426114465 |             |
|         | 1.362827068                                                            | 2.085736341 |             |             |             |             |             |
| YJL055W | YJL055W::YJL055W::molecular_function unknown                           |             |             |             |             | 1           | 0.868643489 |
|         | 1.152846911                                                            | 1.638021623 | 1           | 0.892242472 | 1.01541254  |             |             |
|         | 1.892807027                                                            | 1           | 1.116142019 | 1.206670646 | 1.863317298 | 1.590556548 |             |
|         | 1.589934861                                                            | 0.257764947 | 1.364570102 | 1.265954817 | 1           | 2.212913061 |             |
|         | 1.872192966                                                            | 2.462016615 | 1.980462358 | 1           | 1.299744179 | 1.516370656 |             |
|         | 1.386266942                                                            | 1.19560872  | 1.200149226 | 1           | 1.197769931 | 1.697227251 |             |
|         | 1.295327187                                                            | 1.061631737 | 1.723171938 | 1           | 1.576066344 | 1.845494575 |             |
|         | 1.118312746                                                            | 1.507230073 | 1.622471353 | 1.338829134 |             |             |             |
| YBR149W | YBR149W::ARA1::D-arabinose dehydrogenase                               |             |             |             |             | 1           | 1.089216024 |
|         | 1.071234712                                                            | 1.366580438 | 1.226523135 | 1           | 1.067798391 | 1.260355536 |             |
|         | 1.378756819                                                            | 1           | 1.354465881 | 1.668123435 | 1.995742076 | 1.406807684 |             |
|         | 1.158736924                                                            | 3.062466548 | 2.141430195 | 1           | 1.7213168   | 1.5213318   |             |
|         | 2.833136917                                                            | 2.108265951 | 1           | 1.117702743 | 1.333956937 | 1.920800251 |             |
|         | 1.120024555                                                            | 1.036032509 | 1           | 1.04509216  | 1.635951407 | 2.143669201 |             |
|         | 1.834546868                                                            | 1.563672516 | 1           | 1.674458411 | 2.002726548 | 2.512383849 |             |
|         | 1.69860751                                                             | 3.154273071 | 1.263525396 |             |             |             |             |
| YGL089C | YGL089C::MF (ALPHA) 2::alpha mating factor                             |             |             |             |             | 1           | 1.754270479 |
|         | 1.506514322                                                            | 0.933704683 | 0.98322972  | 1           | 1.337597122 | 1.129953554 |             |
|         | 1.31363704                                                             | 0.940424866 | 1           | 2.124228221 | 3.15812713  | 2.687662957 |             |
|         | 1.276820099                                                            | 0.535161689 |             | 0.59137858  | 1           | 0.932034903 |             |
|         | 1.206724918                                                            | 1           | 1.339917458 | 1.157498572 | 1.065953218 |             |             |
|         | 1.342466735                                                            | 1.104817863 | 1           | 0.820843363 | 1.075824637 | 0.92484537  |             |
|         | 0.761610973                                                            | 1.207234195 | 1           | 0.876361435 | 1.300636335 | 1.33491952  |             |
|         | 1.034513252                                                            | 2.79324061  |             |             |             |             |             |
| YJL057C | YJL057C::IKS1::ira1* kinase suppressor                                 |             |             |             |             | 1           | 1.223400894 |
|         | 1.272312911                                                            | 0.908754635 | 1.057866161 | 1           | 0.972911867 | 0.955557406 |             |
|         | 1.289193329                                                            | 0.95593887  | 1           | 1.250353349 | 1.354844159 | 1.470079151 |             |
|         | 1.032112963                                                            | 1           | 1.256163726 | 5.431996257 | 0.718482567 | 1.147050126 |             |
|         | 2.220696068                                                            | 2.09535084  | 1.64055033  | 1.04145737  | 1           | 0.890247996 |             |
|         | 0.926344961                                                            | 0.735085349 | 0.677484012 | 0.999485955 | 1           | 1.417589353 |             |
|         | 1.566057133                                                            | 1.64994352  | 1.12512823  | 1.446139295 | 1           | 1.509723231 |             |
|         | 1.987128494                                                            | 1.136624488 | 1.785027908 | 1.621364287 | 1.520083213 |             |             |
| YBR151W | YBR151W::APD1::actin patches distal                                    |             |             |             |             | 1           | 1.064247522 |
|         | 1.128234839                                                            | 1           | 1.069326533 | 1.193971037 | 0.996866796 | 1.072495562 |             |
|         | 1.257465059                                                            | 1.340064101 | 1.379058617 | 1.109760455 | 1           | 0.401660981 |             |
|         | 0.876584669                                                            | 0.558233582 | 1           | 2.445369879 | 1.955881803 | 2.569212215 |             |
|         | 2.910119331                                                            | 1           | 0.850983768 | 1.138894269 | 1.18422567  | 1.045418066 |             |

|         |                                                                                                                                       |             |             |             |             |             |             |             |
|---------|---------------------------------------------------------------------------------------------------------------------------------------|-------------|-------------|-------------|-------------|-------------|-------------|-------------|
|         | 0.94191432                                                                                                                            | 1           | 1.00473398  | 0.853480082 | 1.132685458 | 0.765493841 |             |             |
|         | 0.713044348                                                                                                                           | 1           | 1.414369491 | 1.126027808 | 1.148852074 | 0.794138079 |             |             |
|         | 1.356436829                                                                                                                           |             | 0.859862762 |             |             |             |             |             |
| YGL091C | YGL091C::NBP35::NBP35 encodes an essential evolutionary conserved protein with homology to bacterial partitioning ATPases             |             |             |             |             |             | 1           | 1.01909989  |
|         | 1.063141869                                                                                                                           | 1.185144331 | 1.392048647 | 1           | 1.069624571 | 1.039148144 |             |             |
|         | 1.316881298                                                                                                                           | 1.348532288 | 1           | 1.44669985  | 1.431773743 | 1.407543908 |             |             |
|         | 1.182541096                                                                                                                           | 1           | 1.267204835 | 0.85545122  | 1.233431385 | 1.47549334  | 1           |             |
|         | 0.99055691                                                                                                                            | 1.76667469  | 1.527848153 | 0.713075876 | 1           | 1.393994036 |             |             |
|         | 1.684065524                                                                                                                           | 1.088219556 | 0.974924082 | 0.996407583 | 1           | 1.614540701 |             |             |
|         | 1.812912529                                                                                                                           | 1.736735875 | 1.058350841 | 0.904964237 | 1           |             | 1.655149615 |             |
|         | 1.086176321                                                                                                                           | 1.229649573 | 1.044704228 | 2.161915745 |             |             |             |             |
| YJL059W | YJL059W::YHC3::Homolog of human CLN3                                                                                                  |             |             |             |             |             | 1           | 1.764203118 |
|         | 1.280000592                                                                                                                           | 1.205815839 | 1.432417627 | 1           | 1.244358386 | 1.276259407 |             |             |
|         | 1.350044498                                                                                                                           | 1.107204848 | 1           | 1.501594791 | 1.254445912 | 1.498323436 |             |             |
|         | 1.13381394                                                                                                                            |             |             | 0.670289466 | 0.829305277 | 1           |             |             |
|         | 1.148826629                                                                                                                           | 1           | 1.134537744 | 1.216859561 | 1.443930061 | 1.135411752 |             |             |
|         | 1.080654658                                                                                                                           | 1           | 0.898431036 | 1.091499249 | 1.207762004 | 0.883728177 |             |             |
|         | 0.823068257                                                                                                                           | 1           | 1.274686958 | 1.134970753 | 1.122236096 | 1.02920241  |             |             |
|         | 1.116989767                                                                                                                           |             | 1.28366475  |             |             |             |             |             |
| YGL105W | YGL105W::ARC1::associated with tRNA and amino acyl-tRNA synthetases; has affinity for quadruplex nucleic acids                        |             |             |             |             |             | 1           | 1.033993476 |
|         | 0.946220337                                                                                                                           | 1.07833414  | 1           | 1.201486649 | 1.099140813 | 0.868816804 |             |             |
|         | 0.905274281                                                                                                                           | 1           | 1.052590444 | 0.958667994 | 0.771656661 | 0.92171839  | 1           |             |
|         | 1.041961998                                                                                                                           | 0.708712723 | 0.727548434 | 0.876616627 | 1           | 1.227682371 |             |             |
|         | 0.793905334                                                                                                                           | 0.784555535 | 1.000928467 | 1           | 1.082060577 | 1.192543665 |             |             |
|         | 1.133487515                                                                                                                           | 1.137736487 | 1.062553776 | 1           | 0.930527709 | 1.206103117 |             |             |
|         | 0.751960144                                                                                                                           | 0.645164811 | 0.837239462 | 1           | 0.943431562 | 0.965602487 |             |             |
|         | 0.891717631                                                                                                                           | 1.094976804 | 0.76785481  | 0.813454714 |             |             |             |             |
| YJL061W | YJL061W::NUP82::Interacts with nuclear pore complex and participates in nucleocytoplasmic transport; required for poly(A)+ RNA export |             |             |             |             |             | 1           |             |
|         | 0.799891188                                                                                                                           | 0.681343023 | 0.832521798 | 0.771549055 | 1           | 0.843052782 |             |             |
|         | 0.765678732                                                                                                                           | 0.872097111 | 0.58416859  | 1           | 0.856388234 | 0.682195997 |             |             |
|         | 0.364571542                                                                                                                           | 0.838591132 | 1           | 0.590986118 | 0.549475769 | 0.542158445 |             |             |
|         | 0.839961642                                                                                                                           | 1           | 0.749525345 |             | 0.769021169 | 1.070262155 | 1           |             |
|         | 0.904181705                                                                                                                           | 1.018769119 | 0.807406876 | 0.779277493 | 0.884812326 | 1           |             |             |
|         | 1.055257336                                                                                                                           | 0.796557999 | 0.84031386  | 0.68264228  | 0.728470436 | 1           |             |             |
|         | 1.054451301                                                                                                                           | 1.004274477 | 1.128873104 | 1.008001295 | 1.19205407  |             |             |             |
| YJL075C | YJL075C::YJL075C::molecular_function unknown                                                                                          |             |             |             |             |             | 1           | 1.349286193 |
|         | 1.583227189                                                                                                                           | 0.970675873 | 1.698477588 | 1           | 1.093698606 | 1.035051272 |             |             |
|         | 1.443623171                                                                                                                           | 1.537035741 | 1           | 1.208925989 | 0.970115911 | 1.601060531 |             |             |
|         | 1.290820092                                                                                                                           | 1           | 0.485981071 | 0.432663999 | 0.599342385 | 0.6922787   | 1           |             |
|         | 0.846671326                                                                                                                           |             | 1.282252493 | 0.893774905 | 1           | 0.737314038 | 0.709400953 |             |
|         | 0.675508236                                                                                                                           | 0.801950341 | 0.627709538 | 1           | 0.979196616 | 1.279919741 |             |             |
|         | 1.046463864                                                                                                                           | 1.077996436 | 1.775558527 | 1           | 0.860031414 | 1.003970361 |             |             |
|         | 0.930604222                                                                                                                           | 1.17238227  |             | 1.045495061 |             |             |             |             |
| YGL107C | YGL107C::RMD9::Required for Meiotic nuclear Division                                                                                  |             |             |             |             |             | 1           |             |
|         | 0.787569484                                                                                                                           | 0.821297418 | 1.058497447 | 0.828121741 | 1           | 0.927367111 |             |             |
|         | 0.923865518                                                                                                                           | 0.859151522 | 0.905453592 | 1           | 0.757664453 | 0.737438065 |             |             |
|         | 0.590486451                                                                                                                           | 0.857100078 |             | 0.586834018 | 0.65845446  | 0.855435949 |             |             |
|         | 0.393488445                                                                                                                           | 0.738024569 | 0.517328417 | 0.278306317 | 1           | 1.008354219 |             |             |
|         | 0.985443999                                                                                                                           | 0.781195395 | 0.876327566 | 0.953546363 | 1           | 1.060307042 |             |             |
|         | 0.845296421                                                                                                                           | 0.725518439 | 0.700651492 | 0.664407707 | 1           | 1.124803987 |             |             |
|         | 0.955601997                                                                                                                           | 0.966793479 | 1.003720835 | 1.262891557 | 1.016599476 |             |             |             |
| YJL077C | YJL077C::ICS3::Increased Copper Sensitivity                                                                                           |             |             |             |             |             | 1           | 1.39554962  |
|         | 1.764702239                                                                                                                           | 0.943117985 | 1.567251565 | 1           | 1.271470913 | 1.179392356 |             |             |
|         | 1.645115128                                                                                                                           | 1.375100248 | 1           | 1.560487774 |             | 2.705661971 | 1.284792185 |             |

|             |                                                                                                                         |                                                                                                       |             |             |             |   |
|-------------|-------------------------------------------------------------------------------------------------------------------------|-------------------------------------------------------------------------------------------------------|-------------|-------------|-------------|---|
| 0.64643913  | 0.496841898                                                                                                             | 0.591739489                                                                                           | 0.814754313 | 1           | 1.777801363 |   |
| 4.146462664 | 2.681730369                                                                                                             | 1.240707766                                                                                           | 1           | 0.780504237 | 0.575230699 |   |
| 0.695479247 | 0.770092753                                                                                                             | 0.824959527                                                                                           | 1           | 0.981636765 | 1.241835877 |   |
| 0.93332815  | 1.707088555                                                                                                             | 4.361474866                                                                                           | 1           | 0.801511904 | 1.023668617 |   |
| 1.077248986 | 1.551813825                                                                                                             | 1.869457232                                                                                           |             |             |             |   |
| YGL109W     | YGL109W::YGL109W::molecular_function                                                                                    | unknown                                                                                               | 1           | 1.018879681 |             |   |
| 1.445450281 | 1.152563577                                                                                                             | 1.523221836                                                                                           | 1           | 1.009755992 | 1.104995741 |   |
| 1.564326555 | 1.385343866                                                                                                             | 1                                                                                                     | 1.168900652 | 1.38386289  | 1.661375759 |   |
| 1.197935121 | 1                                                                                                                       | 1.101177799                                                                                           | 1.289421167 | 1.081143755 | 1.503352096 | 1 |
| 1.562036654 | 3.031504874                                                                                                             | 1.973729929                                                                                           | 0.953436686 | 1           | 1.084316666 |   |
| 1.454546248 | 0.874589052                                                                                                             | 0.814730882                                                                                           | 1.111156419 | 1           | 0.978067223 |   |
| 1.252975771 | 1.239908208                                                                                                             | 1.083888681                                                                                           | 1.488161084 | 1           | 1.187747093 |   |
| 1.139432563 | 1.131620259                                                                                                             | 1.428095609                                                                                           | 1.489776411 | 2.313398573 |             |   |
| YGL111W     | YGL111W::NSA1::Nop                                                                                                      | seven associated                                                                                      | 1           | 1.131002469 | 0.877044096 |   |
| 1.193028976 | 1.214996919                                                                                                             | 1                                                                                                     | 1.197012437 | 0.907516515 | 0.8655713   |   |
| 1.282908954 | 1                                                                                                                       | 0.691795864                                                                                           | 0.595796877 | 0.569470199 | 1.157817248 | 1 |
| 0.371632998 | 0.237517705                                                                                                             | 0.293153168                                                                                           | 0.503606901 | 1           | 0.48308915  |   |
| 1           | 0.959831565                                                                                                             | 0.741828811                                                                                           | 0.699438555 | 0.958121023 | 0.938881252 | 1 |
| 0.883814318 | 0.682595472                                                                                                             | 0.629367424                                                                                           | 0.871350054 | 0.849920243 | 1           |   |
| 0.656739938 | 0.670547515                                                                                                             | 0.745272604                                                                                           | 0.958126325 | 0.423586725 | 0.915027042 |   |
| YGL113W     | YGL113W::SLD3::synthetic                                                                                                | lethality with dpb11-1; Sld3p interacts with Cdc45 and is required for initiation of DNA replication. | 1           |             |             |   |
| 0.907631246 | 1.087053792                                                                                                             | 1.206592329                                                                                           | 1.171690974 | 1           | 1.114567268 |   |
| 1.254913206 | 1.048710556                                                                                                             | 1.196736629                                                                                           | 1           | 0.90237151  | 0.923406694 |   |
| 0.86933619  | 1.128482253                                                                                                             | 1                                                                                                     | 0.572582169 | 0.560837231 | 0.606772105 | 1 |
| 0.649109252 | 1.323548652                                                                                                             | 0.909164336                                                                                           | 0.802133454 | 1           | 0.845103353 |   |
| 0.810676435 | 0.801969491                                                                                                             | 0.945221545                                                                                           | 0.983832591 | 1           | 0.802304655 |   |
| 0.742142007 | 0.679646487                                                                                                             | 1.247822043                                                                                           | 0.73926219  | 1           | 0.736779346 |   |
| 0.806983595 | 1.102465                                                                                                                | 0.847946657                                                                                           | 0.985016612 | 2.253856072 |             |   |
| YGL115W     | "YGL115W::SNF4::involved in release from glucose repression, invertase expression, and sporulation"                     | 1                                                                                                     | 0.945444189 | 0.976095688 |             |   |
| 0.886472277 | 1.322055325                                                                                                             | 1                                                                                                     | 0.941278666 | 1.025776752 | 1.055538348 | 1 |
| 0.911858785 | 1.006073586                                                                                                             | 0.992620229                                                                                           | 0.813733718 | 1           | 1.54766141  |   |
| 1.230872033 | 1.225687827                                                                                                             | 1.42606222                                                                                            | 1           | 1.838272412 | 1.925271322 |   |
| 1.529887627 | 1.057384448                                                                                                             | 1                                                                                                     | 1.264684049 | 1.294823546 | 1.210460876 |   |
| 1.110184991 | 1.098972555                                                                                                             | 1                                                                                                     | 1.096128459 | 1.326935143 | 1.097500967 |   |
| 0.753965728 | 1.213201487                                                                                                             | 1                                                                                                     | 1.394631275 | 1.41926683  | 1.100683005 |   |
| 1.647589762 | 1.479662009                                                                                                             | 1.246888598                                                                                           |             |             |             |   |
| YBR153W     | "YBR153W::RIB7::Protein involved in the biosynthesis of riboflavin, second step in the riboflavin biosynthesis pathway" | 1                                                                                                     | 1.153820739 |             |             |   |
| 1.092547972 | 1.146223715                                                                                                             | 0.982826328                                                                                           | 1           | 1.06844139  | 0.962586941 |   |
| 0.934656692 | 1                                                                                                                       | 1.33128629                                                                                            | 1.307025492 | 1.102858254 | 1.090839491 | 1 |
| 1.044821933 | 0.223605061                                                                                                             | 0.905448348                                                                                           | 1.285542072 | 1           | 2.029236115 |   |
| 3.336900428 | 1.877496452                                                                                                             | 1                                                                                                     | 0.822045487 | 0.873589143 | 0.886925256 |   |
| 0.967528422 | 0.953974454                                                                                                             | 1                                                                                                     | 0.824454235 | 0.884052687 | 0.762620012 |   |
| 0.933761346 | 1.12094885                                                                                                              | 1                                                                                                     | 0.901255549 | 0.929774864 | 1.055904805 |   |
| 0.94707995  | 1.147411232                                                                                                             | 0.912400256                                                                                           |             |             |             |   |
| YBR155W     | YBR155W::CNS1::cyclophilin                                                                                              | seven suppressor                                                                                      | 1           | 0.821255061 |             |   |
| 0.852675305 | 0.857971521                                                                                                             | 1.096757367                                                                                           | 1           | 0.73781038  | 0.73566993  |   |
| 1.118838802 | 1.069277594                                                                                                             | 1                                                                                                     | 0.732464917 | 0.544344186 | 0.53300227  |   |
| 1.124972305 | 1                                                                                                                       | 0.343629949                                                                                           | 0.373853892 | 0.255300973 | 0.621965877 | 1 |
| 0.655023501 | 0.62881878                                                                                                              | 0.913074045                                                                                           | 1           | 0.828543564 | 0.810170684 |   |
| 0.592191349 | 0.635425639                                                                                                             | 0.850801496                                                                                           | 1           | 1.03572862  | 1.243902091 |   |
| 0.96746556  | 1.295489523                                                                                                             | 1.890489826                                                                                           | 1           | 0.847173383 | 1.002421663 |   |
| 0.916909886 | 1.011789239                                                                                                             | 0.573190574                                                                                           | 0.839723408 |             |             |   |
| YBR157C     | YBR157C::ICS2::Increased                                                                                                | Copper Sensitivity                                                                                    | 1           | 1.345545865 |             |   |
| 1.567459351 | 1.712325807                                                                                                             | 1                                                                                                     | 1.21893006  | 1.044582734 | 1.667445042 |   |

|            |                                      |                              |             |             |             |             |             |
|------------|--------------------------------------|------------------------------|-------------|-------------|-------------|-------------|-------------|
|            | 1.44479623                           | 1                            | 1.743876455 | 1.545090495 | 2.08862849  | 2.233242814 | 1           |
|            | 0.413696185                          |                              | 1.119662446 | 1           | 0.609519262 | 0.746216506 |             |
|            | 0.937508269                          | 0.808438998                  | 1           | 1.130979153 | 1.071727937 | 1.440891577 |             |
|            | 1.269953441                          | 1.150270153                  | 1           | 0.79116103  |             | 0.935207459 |             |
|            | 0.721535249                          | 0.737564119                  | 0.948848837 | 0.4146608   |             | 0.647086156 |             |
| YPL022W    | YPL022W::RAD1::UV                    | endonuclease                 |             | 1           | 0.933725481 | 0.781305667 |             |
|            | 1.330703193                          | 0.758503763                  | 1           | 1.12302637  | 1.219768678 | 0.928417815 |             |
|            | 0.678910638                          | 1                            | 0.987059154 | 1.072049031 | 0.457511912 | 0.989567642 | 1           |
|            | 1.029232549                          |                              | 1.332967767 | 0.637889791 |             | 0.853334388 |             |
|            | 1                                    | 0.973470079                  | 1.146237126 | 1.249239485 | 0.93433781  | 1.150043466 | 1           |
|            | 1.033390165                          | 0.793688957                  | 0.941911386 | 0.857911218 |             | 0.588266284 | 1           |
|            | 0.988447859                          | 1.170060494                  | 1.090289805 | 0.978020152 | 1.015574913 | 1.451784585 |             |
| YBR159W    | YBR159W::YBR159W::molecular_function | unknown                      |             | 1           |             | 1.259394061 |             |
|            | 0.982213757                          | 1.260784461                  | 1.264620717 | 1           | 1.216447778 | 1.029715587 |             |
|            | 1.165048751                          | 1.118308716                  | 1           | 1.10064004  | 0.956032199 | 1.007870969 |             |
|            | 1.126662061                          | 1                            | 0.937585315 | 0.95028292  | 0.714547957 | 0.766506103 | 1           |
|            | 1.058252524                          | 0.416831874                  | 0.65401973  | 1.188587984 | 1           | 1.150619681 |             |
|            | 1.454492046                          | 1.376815447                  | 1.237092247 | 1.129841603 | 1           | 0.925581435 |             |
|            | 1.139115268                          | 1.165864194                  | 0.749157269 | 1.032923409 | 1           | 1.193192874 |             |
|            | 1.01819604                           | 1.041038299                  | 1.014508283 | 1.16768206  | 1.011345695 |             |             |
| YPL036W    | YPL036W::PMA2::plasma membrane       | ATPase                       |             | 1           |             | 1.443249627 |             |
|            | 0.824160237                          | 1.487546099                  | 0.761636569 | 1           | 1.416884466 | 1.419091281 |             |
|            | 0.984840586                          | 1                            | 1.018120422 | 0.801116827 | 0.600625062 | 0.846891228 | 1           |
|            | 0.888903251                          | 1.03328899                   | 1.130290996 | 0.356531679 | 1           | 0.404696087 |             |
|            | 0.28089384                           | 0.171708891                  | 0.338372172 | 1           | 1.037955529 | 0.659032982 |             |
|            | 1.272968594                          | 1.818391884                  | 0.89189342  | 1           | 0.585989862 | 0.404772726 |             |
|            | 0.628539727                          | 0.488657212                  | 0.213691996 | 1           | 0.846539218 | 0.455507635 |             |
|            | 0.768009777                          | 0.705723606                  | 0.508780377 | 0.660220503 |             |             |             |
| YBR172C    | YBR172C::SMY2::partial suppressor of | myo2-66                      |             | 1           |             | 0.835034342 |             |
|            | 0.841471142                          | 1.105077114                  | 0.78737298  | 1           | 0.961333197 | 0.965498135 |             |
|            | 0.846591395                          | 0.802088116                  | 1           | 0.63856663  | 0.706454061 | 0.720452934 |             |
|            | 1.037048961                          |                              | 0.761741453 | 0.796298116 | 1           | 0.557059946 |             |
|            | 0.583493611                          | 0.928927267                  | 1           | 0.870446979 | 0.831239093 | 0.760128439 |             |
|            | 0.788211589                          | 0.932773749                  | 1           | 0.704560238 | 0.728984117 | 0.774054161 |             |
|            | 0.835373795                          | 0.838488861                  | 1           | 0.834101271 | 0.898004032 | 0.994068112 |             |
|            | 0.932118374                          | 1.061119234                  | 0.675106128 |             |             |             |             |
| YPL038W    | YPL038W::MET31::Involved in          | methionine metabolism        |             | 1           |             |             |             |
|            | 0.984280675                          | 1.388262484                  | 1.113834385 | 1.535526583 | 1           | 1.039476651 |             |
|            | 1.009516478                          |                              | 1.575200919 | 1           | 0.99197219  | 1.145322443 | 1.384331025 |
|            | 1.223058445                          | 1                            | 0.812195161 |             | 0.615197268 | 1.416799199 | 1           |
|            | 1.015273208                          | 1.321992027                  | 1.149891691 | 0.936778777 | 1           | 0.865275435 |             |
|            | 0.814571333                          | 0.65435564                   | 0.752794148 | 1.073962436 | 1           | 0.918010505 |             |
|            | 1.262714264                          | 0.983641382                  | 1.294862666 | 1.457736005 | 1           | 1.011078538 |             |
|            | 1.15306955                           | 1.207434969                  | 1.535480462 | 1.259076611 | 1.17596308  |             |             |
| YBR174C    | YBR174C::YBR174C::molecular_function | unknown                      |             | 1           |             | 1.119125239 |             |
|            | 0.98604247                           | 1.197166903                  | 0.870423584 | 1           | 1.003217131 | 1.062240285 |             |
|            | 1.119474749                          | 1.061271709                  | 1           | 1.151930468 | 1.070920154 | 0.943802389 |             |
|            | 1.093748291                          | 1                            |             | 0.285082178 | 0.402432693 | 0.386503429 |             |
|            | 0.47971594                           | 0.313789382                  | 0.501168769 |             | 0.818284146 | 0.88358494  |             |
|            | 1.02675876                           | 0.807599951                  | 1           | 0.793088085 |             |             |             |
|            | 0.864706011                          |                              | 0.966574543 |             |             |             |             |
| YPL040C    | YPL040C::ISM1::nuclear encoded       | mitochondrial isoleucyl-tRNA |             | 1           |             |             |             |
| synthetase | 1                                    | 1.086262945                  | 1.089730194 | 1.607754509 | 0.997488046 | 1           |             |
|            | 1.42978626                           | 1.59045845                   | 1.123639538 | 1.140138748 | 1           | 1.156716305 |             |
|            | 1.183490094                          | 0.814981443                  | 1.441120839 | 1           | 0.90602942  | 1.441555601 |             |
|            | 1.320037024                          | 0.8723859                    | 1           | 0.503077588 | 0.514143185 | 0.421730378 |             |
|            | 0.984339317                          | 1.158973189                  | 1.156661371 | 1.330596002 | 1.517236198 | 1           |             |

|             |                                                                                                                                                                                                                                                                   |             |             |             |             |
|-------------|-------------------------------------------------------------------------------------------------------------------------------------------------------------------------------------------------------------------------------------------------------------------|-------------|-------------|-------------|-------------|
| 1.033210401 | 0.780012339                                                                                                                                                                                                                                                       | 0.975383556 | 0.948055111 | 0.571332779 | 1           |
| 0.757486137 | 0.541629371                                                                                                                                                                                                                                                       | 0.668441063 | 0.756673439 | 0.606800319 | 0.515742524 |
| YBR176W     | YBR176W::ECM31::ExtraCellular Mutant                                                                                                                                                                                                                              |             | 1           | 1.858811831 |             |
| 1.653475472 | 1.361360333                                                                                                                                                                                                                                                       | 1.56010085  | 1           | 1.592684533 | 1.281576658 |
| 1.756887238 | 1.716607278                                                                                                                                                                                                                                                       | 1           | 1.493184171 | 1.517220435 | 1.835671369 |
| 1.558420195 | 0.575182461                                                                                                                                                                                                                                                       |             | 1           |             | 2.333864938 |
| 1           | 1.159161543                                                                                                                                                                                                                                                       | 1.057792883 | 1.049869669 | 0.942247531 | 1.0157907   |
| 1.129783933 | 1.219858243                                                                                                                                                                                                                                                       | 1.297141098 | 1.037615016 | 1.205346382 | 1           |
| 1.189696144 | 1.153052856                                                                                                                                                                                                                                                       | 1.11154061  | 0.83873834  | 1.061456365 | 2.073477659 |
| YPL042C     | "YPL042C::SSN3::Component of RNA polymerase II holoenzyme, involved in RNA pol II carboxy-terminal domain phosphorylation. Activity of the kinase (SSN3)/cyclin (SSN8) pair required, along with SSN6 & TUP1, for transcriptional repression of a-specific genes" | 1           | 0.957540316 | 0.906834786 | 1.355768601 |
| 0.823511375 | 1                                                                                                                                                                                                                                                                 | 1.169646497 | 1.133296991 | 0.967998296 | 0.960844523 |
| 0.970602829 | 1.135363707                                                                                                                                                                                                                                                       | 0.718051408 | 1.296413511 | 1           | 0.900841117 |
| 0.744788782 | 0.82803617                                                                                                                                                                                                                                                        | 1           | 0.753438501 | 0.676526727 | 0.914201545 |
| 0.819283816 | 1                                                                                                                                                                                                                                                                 | 0.849943489 | 0.824427699 | 0.854439498 | 0.854086724 |
| 1.008660766 | 1                                                                                                                                                                                                                                                                 | 1.359097593 | 0.964556473 | 1.581297598 | 1.358124843 |
| 0.844324903 | 1                                                                                                                                                                                                                                                                 | 1.119090997 | 0.830834976 | 0.974072746 | 0.802749243 |
| 0.819580542 | 0.710131055                                                                                                                                                                                                                                                       |             |             |             |             |
| YGL129C     | YGL129C::RSM23::mitochondrial ribosome small subunit component                                                                                                                                                                                                    |             |             |             | 1           |
| 0.589409012 | 0.836690694                                                                                                                                                                                                                                                       | 0.866031347 | 0.957142811 | 1           | 0.829499925 |
| 0.924816056 | 0.755942289                                                                                                                                                                                                                                                       | 0.817671065 | 1           | 0.751540405 | 0.758193884 |
| 0.805362282 | 0.745520491                                                                                                                                                                                                                                                       | 1           | 0.863721892 | 0.5502603   | 0.758350084 |
| 1.197013824 | 1                                                                                                                                                                                                                                                                 | 0.849206142 | 1.313511871 | 1.248202759 | 0.732516138 |
| 1.108896266 | 1.375168776                                                                                                                                                                                                                                                       | 0.923739515 | 0.876166929 | 1.082152128 | 1           |
| 1.311787955 | 1.157336752                                                                                                                                                                                                                                                       | 0.977963085 | 0.760630484 | 0.778217139 | 1           |
| 1.253937492 | 1.219766656                                                                                                                                                                                                                                                       | 1.041815386 | 1.204953938 | 1.532166907 | 1.722352415 |
| YBR178W     | YBR178W::YBR178W::molecular_function unknown                                                                                                                                                                                                                      |             | 1           | 1.499088152 |             |
| 1.236535262 | 1.51147648                                                                                                                                                                                                                                                        | 0.837989614 | 1           | 1.77105757  | 1.717329833 |
| 1.029821582 | 0.979011989                                                                                                                                                                                                                                                       | 1           | 1.748037355 | 1.691986736 | 1.060632066 |
| 0.936595775 | 1                                                                                                                                                                                                                                                                 | 0.367775225 |             | 0.38699581  | 0.5820835   |
| 0.300048976 | 1                                                                                                                                                                                                                                                                 | 1.063970471 |             | 1.32644466  | 1.235358405 |
| 0.866727976 | 1.132467189                                                                                                                                                                                                                                                       |             | 1           | 0.821959091 |             |
| 1.463629627 | 0.667225509                                                                                                                                                                                                                                                       |             |             |             |             |
| YPL044C     | YPL044C::YPL044C::molecular_function unknown                                                                                                                                                                                                                      |             | 1           | 0.63977411  |             |
| 0.629930725 | 0.901070495                                                                                                                                                                                                                                                       | 0.758991366 | 1           | 0.811410915 | 0.741850145 |
| 0.678579316 | 0.781421513                                                                                                                                                                                                                                                       | 1           | 0.47365264  | 0.422638307 | 0.401595409 |
| 0.971382848 | 1                                                                                                                                                                                                                                                                 | 0.288984599 |             | 0.336231416 | 0.45540247  |
| 0.427111491 | 0.391268414                                                                                                                                                                                                                                                       | 0.321966411 | 0.564167396 | 1           | 0.647464871 |
| 0.520405584 | 0.568030118                                                                                                                                                                                                                                                       | 0.789849846 | 0.863690886 | 1           | 0.747641258 |
| 0.496583112 | 0.617574086                                                                                                                                                                                                                                                       | 1.161700375 | 0.729880205 | 1           | 0.461019698 |
| 0.493272669 | 0.88401402                                                                                                                                                                                                                                                        | 0.761132409 | 0.457798236 | 0.881753341 |             |
| YGL131C     | YGL131C::SNT2::Hypothetical ORF                                                                                                                                                                                                                                   |             | 1           | 1.024026201 | 0.923414635 |
| 1.231371651 | 1.149431326                                                                                                                                                                                                                                                       | 1           | 1.345931024 | 1.314789479 | 1.063331545 |
| 0.916969768 | 1                                                                                                                                                                                                                                                                 | 1.229832122 |             | 0.397746137 | 1.132131384 |
| 0.841945743 |                                                                                                                                                                                                                                                                   | 0.651226586 | 0.479790324 |             | 0.945303577 |
| 0.305308589 | 0.531608518                                                                                                                                                                                                                                                       | 1           | 0.835385251 | 0.944087566 | 1.023265614 |
| 0.911913366 | 1                                                                                                                                                                                                                                                                 | 1.129474202 | 0.778444251 | 1.067453206 | 1.015401651 |
| 0.709767915 | 1                                                                                                                                                                                                                                                                 | 0.840872255 | 0.762750861 | 0.952323665 | 0.745355164 |
| 0.73092567  | 0.72238979                                                                                                                                                                                                                                                        |             |             |             |             |
| YBR180W     | YBR180W::DTR1::dityrosine transporter MFS-MDR                                                                                                                                                                                                                     |             | 1           | 1.392651847 |             |
| 1.080754604 | 1.141336305                                                                                                                                                                                                                                                       | 1           |             | 1.152787358 | 1.218973625 |
| 1.30676567  | 1.047983877                                                                                                                                                                                                                                                       | 1.354955115 | 1           |             | 1.187190936 |
| 0.606119197 | 1                                                                                                                                                                                                                                                                 | 1.45492591  | 0.971801461 |             |             |
|             |                                                                                                                                                                                                                                                                   | 1.304651904 |             |             |             |
| 1.130548299 | 1.154072396                                                                                                                                                                                                                                                       |             |             |             |             |

YPL046C "YPL046C::ELC1::similar to mammalian elongin C, interacts with elongin A" 1 1.080267334 1.365397512 1.734681566 1  
1.063819408 1.348134056 1 0.961193899 1.004883758 1.45290205  
1.094150467 0.629164015 0.468729075 0.457260063 1  
1.418321149 1.606036876 2.156798026 1.578517915 1 1.13480915  
1.143997193 1.018313674 1.044048173 1.138511414 1 1.010262448  
1.100240169 1.178634262 1.136072468 1.104027324 1 1.138670138  
1.070334582 1.158534605 1.17771991 1.290947437 1.118171805

YGL133W YGL133W::ITC1::Imitation switch Two Complex 1 1 0.971163821  
0.953157663 1.09870533 1.093417424 1 1.07403044 1.105254252  
0.905971986 0.983126785 1 0.938386528 0.97530683 0.778024114  
1.081403581 1 1.071861687 1.228114955 1.060065105 1.10675944 1  
1.193983279 1.163294349 0.738024202 0.820254021 1 1.094034336  
1.189713098 1.130827034 1.094415847 0.983011954 1 0.904535895  
0.95878191 0.979003832 0.905778206 0.903538017 1 0.973765533  
1.237176366 1.022588195 1.168114632 0.923960684 0.941295842

YBR182C "YBR182C::SMP1::Second MEF2-like Protein 1<br>Transcription factor of the MADS (Mcm1p, Agamous, Deficiens, SRF) box family; closely related to RLM1" 0.906525293 1.012708194 1.177907218  
0.987503711 1.081782864 1 1.065893877 0.989915682  
0.874580984 1 0.510586753 0.706597221 1  
1.330114265 0.260281151

YGL135W "YGL135W::RPL1B::Homology to rat L10a, eubacterial L1, and archaeobacterial L1; identical to S. cerevisiae L1A (Ssmlp)" 1 1.279327833  
0.909385643 0.679262128 0.95728374 1 1.048981931 0.825556352  
0.80269116 0.892852552 1 0.886972507 0.711681835 0.479788905  
0.598827242 1 0.455510299 0.200422408 0.131642269 0.493478984 1  
1.281141409 0.620818991 0.398484928 0.815950005 1 1.367884834  
1.006155685 1.673422856 1.680834744 1.371646738 1 1.223752304  
1.128910313 0.794948258 0.468135695 0.700764659 1 1.31755711  
1.07018522 1.023660594 1.325839311 0.807277859 1.387864073

YPL060W YPL060W::LPE10::mitochondrial protein with homology to MRS2 1  
1.148877015 1.248159083 1.646150435 1 1.198473  
1.390133139 1 1.532451244 1.674916763 1.890887098 1  
1.951635613 1.753358653 2.032335202 1 1.093892347  
1 1.05993092 1.10482142 1.021455268 0.920131542 0.946920994 1  
0.985891793 1.285530841 1.50565335 1.124861633 1.196903386 1  
1.234366685 1.392718967 1.135468851 1.207766918 1.293296646

YPL062W YPL062W::YPL062W::molecular\_function unknown 1 1.1895078  
1.250328015 1.193186561 1.606812193 1 1.186057305 1.224881065  
1.421418772 1 0.928510314 0.981423429 1.258509893 1.353513555 1  
1.135598664 1.096864078 0.990546251 0.429577609 0.767098222  
0.605771 1.093328043 0.900152164 1.10423033 1  
1.080411692 1.192819588 1.459636106 1 0.848293874  
0.917714679

YGL137W YGL137W::SEC27::Involved in endoplasmic-to-Golgi protein trafficking  
1 0.876906646 0.775495849 1.160527037 0.68729614 1 1.149345868  
1.235478433 0.733440359 0.786230479 1 0.981733697 1.087989775  
0.514725153 1.00948681 2.350988637 1.894600353 1.732208675  
0.893944317 1 0.470083544 0.694022017 1 1.025437977  
1.097582919 1.16119305 1.159762394 0.871190382 1 1.021453046  
0.82699552 0.883412607 0.882600192 0.496102717 1 0.804181875  
0.814553731 1.095325178 0.778535532 0.798675208 0.663723006

YPL064C YPL064C::CWC27::Complexed with Cef1p 1 0.737111759  
1.134404849 0.808060407 1.249562918 1 0.811118456 0.80664941  
1.150335893 1.09023171 1 0.775914299 0.935860848 1.108118157

1.014394252 1 1.123646176 0.987170046 1.089836458 1.986390763 1  
1.541364587 2.032551781 1.784267994 1.419162929 1 0.943616143  
1.122794179 0.806989717 0.778179002 1.157094415 1 0.994305901  
1.289701751 1.346302185 1.191205089 1.614722333 1 1.2202431  
1.196043816 1.103971454 1.598777654 1.201084774 1.188221762  
YGL139W YGL139W::YGL139W::molecular\_function unknown 1  
0.708459499 0.869701709 0.744433222 1 0.883842035 0.847169995  
0.654427006 0.822843572 1 0.958704252 0.880150741 0.568708921  
0.833073248 1 0.845404812 0.459558092 0.52179994 0.599359517 1  
0.961901233 0.902208836 0.42933962 0.420458472 1 0.933436674  
0.714089231 0.850623777 1.184088934 0.722675772 1 0.793990384  
0.62125309 0.676509318 0.618604993 0.490013583 1 0.894214365  
0.864896267 0.839945076 0.743100598  
YGL153W YGL153W::PEX14::Peroxisomal peripheral membrane protein (peroxin)  
involved in import of peroxisomal matrix proteins 1 0.684405653  
1.047663631 0.912176276 1.110871861 1 0.895071934 0.919340186  
1.117551175 1.070180399 1 0.894638622 1.162205011 0.974852263  
1.001700265 0.811584332 0.558538035 0.632632727 0.803174604 1  
1.982732388 2.574503091 1.732008946 1.639121682 1 1.135356235  
1.69435022 1.254078684 0.952426862 0.969307969 1 1.04475365  
1.436846959 1.316062231 1.206008357 1.273038849 1 1.183517597  
1.504280961 1.344449054 1.511874913 1.20471139 0.935166396  
YGL155W YGL155W::CDC43::may participate in a ras-like C-terminus  
modification of proteins involved in nuclear division and bud growth 1  
1.064258442 0.949775614 0.969748962 0.895040982 1 1.076117091  
0.950457653 1.070016225 1.044264874 1 0.90636492 0.840722362  
0.752672819 0.962140732 1 0.852615921 0.755345871 0.604923761  
0.754698098 1 1.631445484 1.147307888 0.770956146 1.128369113 1  
1.054229343 0.902151541 0.871002209 0.863631177 0.974451754 1  
1.096381813 1.000314748 0.884718147 0.645259636 0.99206805 1  
1.147603793 0.99579088 0.949735491 1.077576996 1.237254514 0.79331536  
YGL157W YGL157W::YGL157W::molecular\_function unknown 1 1.13797241  
1.087383673 1.243511149 1.489338784 1 1.24873179 1.430980208  
1.311243399 1.502114183 1 1.230050964 1.603251795 1.802176815  
1.428050158 1.225753001 1.118306315 1.104955409 1.016345992 1  
1.466973655 1.10710117 1.385445369 1 0.972507446 1.241756975  
1.220504119 0.7051566 0.611351996 1 0.92540204 1.375703869  
1.407648933 1.060586926 1.065058205 1 1.142201061 1.399792169  
1.103039109 0.944243575 1.415163204 1.470172714  
YGL159W YGL159W::YGL159W::molecular\_function unknown 1 1.360914858  
1.304225333 1.446976281 1.586622328 1 1.349871464 1.274567391  
1.448037474 1.343855128 1 1.266737333 1.121182011 1  
1.148989582 1.119883344 1 1.289567473 1.027896647  
1.062836259 1 0.931544808 1.119698117 0.945305392 0.892924612  
1.006734743 1 1.025777737 1.06076193 0.847816495 0.609954638  
1.126171419 1 1.338228389 1.226880901 0.894145063 1.276496634  
1.622210457 1.234629811  
YBR196C YBR196C::PGI1::Phosphoglucosomerase 1 0.916092604  
0.589541497 0.919862098 0.52800564 1 0.997969719 1.031429641  
0.605092749 0.777656006 1 1.190200805 0.922782582 0.719364457  
0.775524129 1 1.892257371 1.798364038 1.986423799 0.631722305 1  
0.799199829 0.388193784 0.398761187 0.498850373 1 1.016332341  
0.969285131 1.211081027 1.297878118 0.7909849 1 0.783934453  
0.834577128 0.882442415 0.995597019 0.422057765 1 1.317907966  
0.937644378 1.351862268 0.783070223 1.101103154 1.432520897  
YBR198C YBR198C::TAF5::TAF(II) complex (TBP-associated protein complex)  
component required for activated transcription by RNA polymerase II 1

|             |                                                                                                             |             |             |             |               |
|-------------|-------------------------------------------------------------------------------------------------------------|-------------|-------------|-------------|---------------|
| 1.025647075 | 0.943008318                                                                                                 | 1.496856698 | 0.7759021   | 1           | 1.06222988    |
| 1.136906146 | 1.132427325                                                                                                 | 0.930716328 | 1           | 1.050627976 | 1.087516147   |
| 0.952666064 | 1.213095543                                                                                                 | 1           | 0.89407074  | 1.328382963 | 1.010048626   |
| 0.729932679 | 0.811827006                                                                                                 | 0.468866747 | 0.572919629 | 1           | 0.895736235   |
| 0.895512891 | 0.826658182                                                                                                 | 0.911008916 | 0.939178688 | 1           | 0.864023836   |
| 0.785735292 | 0.685017134                                                                                                 | 0.908510724 | 0.897569943 | 1           | 0.912047274   |
| 0.82024765  | 1.162402723                                                                                                 | 0.892141417 | 1.132908675 | 0.901892695 |               |
| YBR200W     | "YBR200W::BEM1::SH3-domain protein that binds Cdc24p, Ste5p and Ste20p, and the Rsr1p/Bud2p/Bup5p GTPase" 1 |             |             |             |               |
| 1.047138312 | 0.975318838                                                                                                 | 1           | 1.051310497 | 1.012503095 | 1.186646199   |
| 1.043398057 | 1                                                                                                           | 1.06964388  | 1.195755255 | 0.807593324 | 1.076979368 1 |
| 1.123748445 | 0.957269706                                                                                                 | 0.973632249 | 1.164054532 | 1           | 1.329800358   |
| 0.885954331 | 1.045031619                                                                                                 | 1.324195103 | 1           | 0.958479074 | 1.255468536   |
| 0.927533409 | 0.868437652                                                                                                 | 0.921224582 | 1           | 0.940576442 | 1.110084875   |
| 1.005012335 | 1.114329623                                                                                                 | 1.183299993 | 1           | 1.036975501 | 1.249996742   |
| 1.181694431 | 0.998522748                                                                                                 | 1.100881846 | 1.051624402 |             |               |
| YPL066W     | YPL066W::YPL066W::molecular_function unknown 1 0.818910654                                                  |             |             |             |               |
| 0.892405201 | 0.9247718                                                                                                   | 1.380149917 | 1           | 0.886308666 | 0.978992858   |
| 0.743345806 | 0.944022607                                                                                                 | 1           | 0.938216582 | 0.83076669  | 0.829008869   |
| 0.870805575 | 1                                                                                                           | 1.258427613 | 1.180907162 | 1.128926329 | 1.026595258 1 |
| 0.818531913 | 0.929863058                                                                                                 | 0.72570346  | 1.200942251 | 1           | 1.128953792   |
| 1.129867172 | 0.936013085                                                                                                 | 0.763427747 | 1.014218458 | 1           | 0.799300876   |
| 1.075353439 | 1.121998269                                                                                                 | 0.777201696 | 1.059334375 | 1           | 1.031267141   |
| 1.106020827 | 1.115549333                                                                                                 | 1.153644725 | 1.203909221 | 0.816957217 |               |
| YBR202W     | YBR202W::CDC47::Essential for initiation of DNA replication 1                                               |             |             |             |               |
| 1.149757823 | 1.193856791                                                                                                 | 1.319753049 | 0.903177191 | 1           | 1.368731452   |
| 1.325143748 | 1.072280676                                                                                                 | 0.848455237 | 1           | 1.130304797 | 0.93500436    |
| 0.517951467 | 0.94707561                                                                                                  | 1           | 0.645574902 | 0.562044739 | 0.466552033   |
| 0.678110598 | 1                                                                                                           | 0.665224673 | 0.614606417 | 0.52312104  | 0.874211127 1 |
| 0.842272631 | 0.843295516                                                                                                 | 1.085938459 | 1.014073205 | 1.081158088 | 1             |
| 0.905617767 | 0.559376269                                                                                                 | 0.73141502  | 0.837777387 | 0.953596247 | 1             |
| 0.715470218 | 0.555669478                                                                                                 | 0.938829549 | 0.838689544 | 0.901026895 | 0.789812857   |
| YPL068C     | YPL068C::YPL068C::molecular_function unknown 1 0.916182255                                                  |             |             |             |               |
| 1.104903328 | 0.855077592                                                                                                 | 0.92593155  | 1           | 0.929628336 |               |
| 1.205614757 | 1                                                                                                           | 0.673102428 | 0.695723849 | 0.876091451 | 0.858892534 1 |
| 0.495238778 | 0.568687935                                                                                                 | 0.555793477 | 0.635732243 | 1           | 0.532097763   |
| 1.497212463 | 0.871016888                                                                                                 | 1           | 0.686616337 | 0.52680601  | 0.615668267   |
| 0.731018773 | 0.920762538                                                                                                 | 1           | 0.528350671 | 0.796468119 | 0.619995032   |
| 1.251824495 | 1.688803412                                                                                                 | 1           | 0.37618447  | 0.556519177 | 1.083772144   |
| 0.770122163 | 0.671270594                                                                                                 | 0.93078828  |             |             |               |
| YBR204C     | YBR204C::YBR204C::molecular_function unknown 1 1.713172698                                                  |             |             |             |               |
| 1.833541015 | 1.679087079                                                                                                 | 2.025161294 | 1           | 1.822800558 | 1.764186368   |
| 1.835842116 | 1.675986698                                                                                                 | 1           | 1.693808722 | 1.862618278 | 1.942492698   |
| 1.788392254 | 1                                                                                                           | 1.159710182 | 0.965272405 | 1.194630604 | 1             |
| 1.925737816 | 1.070602308                                                                                                 | 1.599234878 | 1.649360536 | 1           | 1.253448298   |
| 1.939595209 | 1.411026474                                                                                                 | 0.929016612 | 1.240144895 | 1           | 1.097983532   |
| 1.493927799 | 1.790871623                                                                                                 | 1.048939948 | 1.466596189 |             | 1.129458364   |
| 1.308213285 | 0.92590962                                                                                                  | 0.983470638 | 1.545827718 | 1.873835452 |               |
| YPL070W     | YPL070W::YPL070W::molecular_function unknown 1 0.687450972                                                  |             |             |             |               |
| 0.904327039 | 0.977094684                                                                                                 | 1.06312228  | 1           | 1.045263559 | 1.000257822   |
| 0.887249304 | 0.894850776                                                                                                 | 1           | 0.998595394 | 1.087452949 | 0.915658959   |
| 1.052847235 | 1                                                                                                           | 0.980725909 | 0.874246312 | 1.236941656 | 1.057824741 1 |
| 0.946821046 | 1.622416369                                                                                                 | 1.64833456  | 1           | 1.197136566 | 1.46383436    |
| 1.253208678 | 0.723778345                                                                                                 | 1.00480389  | 1           | 1.673840066 | 1.578746948   |
| 2.02077794  | 1.576497662                                                                                                 | 1.35695752  | 1           | 1.827018679 | 1.699787696   |
| 1.311875748 | 1.235854616                                                                                                 | 1.467936324 | 1.203107335 |             |               |



YBR206W YBR206W::YBR206W::molecular\_function unknown 1 2.048632707  
1.787234526 1.182660966 2.181848863 1 1.399080409 1.21267779  
1.781361737 1.736007549 1 1.447014829 1.287646801 2.020522739  
1.376710915 1 1.047036835 0.439519154 0.492736159 0.844156048 1  
1.252656868 1.691260468 1.147034326 0.797486519 1 1.232013357  
1.100079941 1.016464618 1.107131085 0.913588861 1 1.037771601  
1.269099986 0.986112811 0.687364222 1.554917491 1 1.053052939  
1.531581361 1.023727563 1.848880161 1.15965951 1.053375628  
YPL084W YPL084W::BRO1::BCK1-like resistance to osmotic shock 1  
0.986961197 1.064254884 1.073813776 0.906444171 1 1.226420267  
1.109466233 0.713466647 1 0.967550154 1.136177061 0.643831879  
0.903653385 1.535681378 1.559969688 1.13938447 1.111241631 1  
1.297228773 0.729635901 1.248860934 1.267422188 1 0.984608955  
1.103522088 0.962173472 0.90266129 0.949644789 1 1.072683428  
0.786029882 1.186884996 0.934155517 0.688490184 1 1.21821307  
0.998310472 1.082762988 0.840744553 1.075263929 0.857235872  
YBR220C YBR220C::YBR220C::molecular\_function unknown 1 1.313376003  
0.985898581 1.495104384 0.774516384 1 1.3924363 1.453407695  
1.083430254 1.110232651 1 1.366767245 0.922371593 0.704464267  
1.266966509 1 0.696613266 0.488633671 0.403288949 1  
0.729825573 1 0.966773991 1.058684781 1.100028749 1.301228718  
0.951235006 1 0.701829333 0.482509659 0.705603695 0.688065568  
0.533049219 1 0.805368441 0.650031557 1.000542865 0.653144094  
0.941950767 0.765295387  
YPL086C YPL086C::ELP3::elongator protein; histone and other protein  
acetyltransferase; has sequence homology to known HATs and NATs 1  
0.820498545 0.588319485 0.886010083 0.838379743 1 0.831561685  
0.782662149 0.651272514 0.790503958 1 0.585449896 0.386612967  
0.266763544 0.875859885 1 0.457995085 0.346075332 0.339564331  
0.446112185 1 0.440665663 0.272301174 0.273366376 0.605196443 1  
0.735172946 0.526228727 0.560217225 1.066023007 0.844137963 1  
0.978067223 0.523045998 0.421009789 0.768863542 0.979608366 1  
0.853756884 0.508861362 0.82787731 1.276755577 0.632154507 0.897514579  
YGL161C YGL161C::YGL161C::molecular\_function unknown 1 1.459053901  
1.59791945 1.352703062 1.475559273 1 1.380665768 1.33968482  
1.66861902 1.507131394 1 1.53425788 1.66592433 1.643522649  
1.56134183 1.137334955 0.936227832 0.642315885 0.954457514 1  
1.701354741 1.43110548 1.207463254 1 1.040943995 1.49456013  
1.473032926 1.135561329 1.093157452 1 1.171224379 1.345328344  
1.43639268 0.927141268 1.119505075 1 1.360938547 1.314743821  
1.077711302 1.194947422 1.368586113 1.026231372  
YBR222C "YBR222C::FAT2::Fatty acid transporter, very similar to FAT1" 1  
1.376173224 1.092085532 1.634710547 0.567491035 1 1.693529284  
1.876160217 1.062107303 0.991539929 1 1.686401155 1.657326967  
1.430235166 1.26535974 1 1.312399236 1.706783737 1.514283592 1  
0.664323431 0.659989153 0.453495015 0.602412415 1 1.135121161  
0.969982952 0.737966455 1.444624869 0.992618462 1 0.698155566  
0.446543255 0.643657933 0.567444745 0.349231016 1 0.876781391  
0.64180712 0.869141991 0.537669017 0.977270545 1.048121951  
YPL088W YPL088W::YPL088W::molecular\_function unknown 1 0.762019556  
0.914963377 1.075182548 1 0.889398146 0.893116591 1.316935236  
1.403042976 1 0.748633511 0.998839447 1.136116533 1.222880802 1  
0.82469311 0.916444245 1.278134859 1.875736445 1 1.196216762  
1.899460236 2.131482415 0.964548884 1 0.989183095 1.163952623  
0.969072943 1.162731546 0.99437486 1 0.801368034 1.19141675  
1.421457776 1.273383979 1.455154449 1 0.936661372 0.952384524  
0.821890947 1.117720162 1.19263295 1.467545823

YGL163C "YGL163C::RAD54::Required for X-ray damage repair, mitotic recombination, and full meiotic recombination. mRNA increases in meiosis." 1  
1.518499836 1.233897616 1.187360285 1.319604248 1 1.372255974  
1.147106216 1.292578374 1.273927393 1 1.259113825 1.315859962  
1.177831343 1.170363568 1 0.93526712 0.728172939 0.679267266  
0.938835729 1 1.109927041 1 1.002614681  
0.884524569 0.934548612 0.941902693 1.119723006 1 1.039813906  
1.190688347 0.737094438 0.914215165 1.039600048 1 0.951034406  
1.135801306 1.140105359 1.522264817 0.962126721 1.239883592  
YBR224W YBR224W::YBR224W::molecular\_function unknown 1 1.324988017  
1.535117294 1.333277553 1 1.473100998 1.183050982 1  
1.535945566 1.520627082 1.320151068 0.954914637  
1 0.740025137 1.037742007  
1.075918066 1.035508257 1 0.543407143 0.881739222 1.256566944  
1.656047365 1 0.751558625 0.555059231 1.065737554 0.144264377  
YGL177W YGL177W::YGL177W::molecular\_function unknown 1  
1 1.956749726 1.643612583 1  
2.060495296 2.011545896 0.403000026  
0.528917576 0.394629648 1 0.757994224 0.600165098 0.673323578  
0.808973647 0.742655857 1 1.14454674 1.096561948 0.960469199  
1.225715527 1 1.094238543 1.047043204 1.043243839  
1.028858158  
YBR226C YBR226C::YBR226C::molecular\_function unknown 1 1.509398556  
1.77809946 1.230254136 1.948783087 1 1.232017262 1.184058954  
1.727481534 1.558285934 1 1.355265657 1.599337913 2.803707556  
1.441381822 1 1.656955361 1.184095278 1.655057566 1.220397986 1  
1.596889561 2.440951794 1.928046778 1.105403737 1 0.90667574  
1.03414457 0.936237324 0.874215956 0.965101597  
1 1.357578109 1.227727081 1.523288543 1.668222374  
0.887007122  
YPL090C "YPL090C::RPS6A::Homology to rat, mouse, and human S6" 1  
1.325870974 1.232999847 0.956651571 1.722388029 1 1.11850292  
0.950083158 1.240883044 1 0.760502125 0.825284844 0.675236018  
1.02654116 1 0.822883515 0.399740977 0.226142746 0.798262018 1  
1.191669258 0.717420196 0.36936067 0.715307063 1 1.205748118  
1.251222835 1.082528483 1.228301342 1.079827286 1 1.377058201  
1.666448612 1.157894371 1.076926363 1.419288399 1 1.228726161  
1.120400423 0.77371092 1.674328733 0.910698007 1.360719714  
YPL092W YPL092W::SSU1::putative sulfite pump 1 1.378077823  
0.913338911 0.896759842 0.738265069 1 1.173908995 0.913778702  
0.9595498 0.719324736 1 41.21694374 31.82373825 20.32458419  
21.74410771 1 22.90363285 24.50260434 17.72772576 10.21711856 1  
1.545211954 0.582048883 0.420416554 0.886527617 1 4.296920126  
10.13620133 20.69978095 18.24204009 10.30767805 1 2.634902437  
6.09878399 18.15417513 5.83269679 11.07556602 1 1.095731707  
1.129743551 1.234584033 1.83929235 2.739198837 15.05985665  
YGL179C YGL179C::TOS3::not yet annotated 1 1.272228631 1.245721143  
1.421939135 1.114387313 1 1.193900569 1.299147402 1.392240956  
1.160047348 1 1.12066124 1.497554705 1.550600711 1.554898771  
0.488625878 0.669213509 1  
1.613799234 1.726512652 1.523816732 1.0001273 0.993639308 1  
1.525848427 2.206537039 1.99463737 1.466912767 1.480171776 1  
2.070899389 2.431735272 1.69591907 1.497048914 1.324033246 0.844101524  
YPL094C YPL094C::SEC62::membrane component of ER protein translocation apparatus 1 1.068156291 0.971086461 0.915196688 1.014956038 1  
0.872281566 0.972160592 0.805579507 1 0.951122487 0.689653986  
0.688438825 0.911758727 1 0.920039597 0.704924189 0.530709921

0.937412872 1 0.952659968 0.723782814 0.670333146 0.928651043 1  
0.985050291 0.884039797 0.813678973 0.943252584 0.922228255 1  
0.911418656 1.022498221 0.993672402 0.763319019 0.929239802 1  
0.977204758 0.834778741 0.772287979 1.047972764 0.817903456 0.940420177  
YGL181W YGL181W::GTS1::Putative zinc-finger transcription factor 1  
1.153094311 1.201213043 1.296522564 1.045875471 1 1.427744449  
1.465796871 1.18532624 1.125226235 1 1.469274755 1.663076073  
1.396744409 1.19910207 1 2.669057747 1.534795014 2.50173232  
1.690529868 1 2.410436826 1.478201938 1.478523137 1  
1.367352495 1.733024407 1.246046971 0.831308981 0.9975613 1  
1.796232447 1.542924267 1.315264821 1.038553101 0.996588067 1  
2.094492878 1.702611696 1.073707197 0.89191759 1.10704108 0.971942653  
YPL108W YPL108W::YPL108W::molecular\_function unknown 1 0.88468705  
1.01816026 0.887842293 1.299882076 1 0.898335816 0.849728806  
1.312609332 1 0.849027144 0.758896473 0.969619907 1.014148535 1  
0.897517507 0.663059151 0.735747398 1.122204995 1 0.700378236  
0.949661715 0.642505133 0.515340855 1 0.727498097 0.940103726  
0.99016123 0.929636739 0.985474721 0.790101417 0.879909786  
0.905078735 1.118611567 1.452092567 1 0.861897839 1.078357195  
1.286437983 1.403933349 1.194478735 0.899265805  
YGL183C YGL183C::MND1::needed for Meiotic Nuclear Divisions 1  
1 1 1.745467424  
1 0.776232339 1 0.906268182  
0.961555264 1 0.888526701 1.163160801 0.907459982 1  
0.801051567 0.834750708 0.827486616 1.041797312  
0.023122349  
YGL185C YGL185C::YGL185C::molecular\_function unknown 1 1.504113413  
1.338724764 1.50661144 1.511385177 1 1.278330819 1.422669643  
1.478263836 1.566808259 1 1.037972481 1.332664568 1.242781308  
1.535454349 1.244367304 1.219890246  
1.124142101 0.939603187 0.803761091 0.844917992 1  
1.060098676 1.095267322 1.040189964 0.941241045 0.897684585 1  
1.48194037 1.504604692 1.068986674 1.282453021 1.172460524  
YGL187C YGL187C::COX4::subunit IV of cytochrome c oxidase 1  
1.644077986 1.640699458 1.341634291 1.997724106 1 1.609725349  
1.472877282 1.455751534 1.636755042 1 0.798897869 0.899844275  
1.348844255 0.811940771 1 1.519370929 0.662131871 0.969793764  
1.694909931 1 1.014297986 1.631727253 1.46677766 1  
0.557873064 0.327419786 0.370242583 0.829241159 0.71579269 1  
0.505745682 0.196350444 0.14915993 0.271044272 1.041551947 1  
0.64005447 0.226013759 0.493635111 1.610939964 1.707907175 1.449157695  
YGL201C YGL201C::MCM6::Member of the MCM/P1 family of proteins involved in  
DNA replication 1 1.443339857 1.933462497 1.14868715 1  
1.988194942 1.893120779 1.430086121 1.349486942 1 1.411810875  
1.206420952 1 0.889213617 0.285220921  
1 0.884256794 0.843685375 0.835822956 0.888742378 0.859856556 1  
0.98898515 0.76923422 0.575155981 0.748552596 0.653755327 1  
1.069521326 0.701359265 1.057257838 0.863610911 0.892840778 0.784559128  
YGL203C YGL203C::KEX1::Killer toxin and alpha factor precursor processing.  
Kex1p can cleave lys and arg residues from the C-terminus of peptides and  
proteins. 1 1.467168803 1.448899242 1.650673907 1.20386484 1  
1.492418526 1.547353007 1.271603848 1.145475326 1 1.448983514  
1.494722404 1.155787336 1.660735334 1 1.06237116 0.872811395  
1 1.167778076 0.668574623 1 0.903225209 1.019134543  
0.888545962 0.832450037 0.957908387 1 1.008803405 0.978488013  
1.063585258 0.844357419 1.104524714 1 1.027912766 0.945451489  
1.065133664 1.026276582 1.080977292 0.774051619

YER060wA YER060wA::FCY22::identical to FCY2 1 1.5248633 1.170287793  
1.389165475 1.140157824 1 1.258973033 1.204487168 1.227557972 1  
1.254832144 1.209575442 0.82828401 1.171136246  
0.5597467 0.345757588 1 0.829609112  
0.853801532 1.034778151 0.994072316 0.900091498 1 0.936398073  
1.04082793 0.826234143 1.015262628 1.115729029 1 0.807575227  
0.701188493 0.891633233 1.070090982 0.904680233 1.112042463  
YER093CA YER093CA::YER093C-A::molecular\_function unknown 1 1.028536625  
1.268882135 1.065395942 1.286686952 1 0.989478777 1.209646873  
1.430117726 1.399731219 1 1.309082295 1.502167479 2.202735188  
1.339799558 1 1.449455161 1.031893643 1.572137375 1.860879013 1  
1.642226422 3.612114906 2.455027931 1.448639835 1 1.495907186  
2.097748668 1.492614313 1.018441738 1.158315886 1 1.446517471  
2.006135415 1.631594446 1.245133435 1.478348119 1 1.272294701  
1.872199909 1.15195753 1.342881828 1.58772256 0.927285829  
YER066CA YER066CA::YER066C-A::molecular\_function unknown 1 1.160071199  
1.289343835 1.281467959 1 1.456621158 1.243100056  
1.234396028 1 1.403170718 1.902359093 2.565864535 1.132933816 1  
4.495639983 1.975234453 2.418966194 2.121582269 1 2.463949522  
2.957046624 4.367814714 1.685610404 1 1.388110995 1.897191808  
2.080883949 1.339274659 1.358075897 1 1.38602189 1.951601988  
2.495398933 0.825492416 1.14032842 1 2.23564686 1.745130585  
1.036702316 1.476743622 2.871421702 1.171584964  
YBR228W YBR228W::SLX1 1 1.227887294 1.426311938 1.238770801  
1.487505801 1 1.130583969 1.045118715 1.434689483 1.529883639 1  
1.406836964 1.455806511 1.601479875 1.275237395 1 1.731212365  
1.422116616 1 1.89881607 1.789084772 1.216881923 1  
1.137222569 1.050810037 0.935470349 1.050503766 0.872697962  
1.19146842 0.818515516 0.985597532 1.233895878 1 1.19344322  
1.359624808 1.187589276 1.292577894 1.278411073  
YBR230C YBR230C::YBR230C::molecular\_function unknown 1 1.38995069  
2.221246155 1.41057488 2.262645537 1 1.53300601 1.756339535  
2.137179092 1.955277687 1 1.69772953 3.22753173 6.633815288  
1.809242073 1 2.839262199 2.526408718 4.44018106 3.786862279 1  
2.783815938 4.141501964 6.723970453 2.811206863 1 1.059978587  
1.284827923 0.718000541 0.690564116 0.822694027 1 0.968916903  
1.207981915 1.076318494 0.651555961 1.795333165 1 1.356710285  
1.31000971 1.112064774 1.064623034 2.602739118 1.486809512  
YBR244W YBR244W::GPX2::Glutathione peroxidase paralogue 1 1.155661523  
1.412783928 1.065322628 1.573965985 1 0.880597262 0.940597231  
1.670030693 1.238462601 1 2.786222144 3.260186157 1.739626022  
1.100688325 1 5.467327915 8.058905046 2.987917314 1.395060909 1  
8.564359911 12.67823643 5.872015526 1.151219626 1 1.961590662  
4.130103864 1.120384533 0.305217023 0.468104826 1 2.450294313  
6.74840787 2.412565429 0.723244534 1.302420444 1 3.376734235  
6.890521305 1.55994723 0.697098206 0.958016192 3.045420207  
YPL110C YPL110C::YPL110C::molecular\_function unknown 1 0.850291345  
0.917844345 1.136404285 0.870693934 1 1.098313526 0.933027022  
0.866633553 1 0.989886437 0.979225365 0.586044455 1.096644901 1  
0.942848397 0.867850697 1 0.619850149 1.135331136  
1.138374672 1 1.078680716 1.026144914 1.096624013 1.016897339  
0.982200616 1 1.002457977 0.745655826 1.095544268 0.84479229 1  
1.094167482 0.825236725 0.886297131 1.087028244 0.870161377 1.070012531  
YBR246W YBR246W::YBR246W::molecular\_function unknown 1 1.146351096  
0.921703924 1.416016654 0.871045081 1 1.201503726 1.221326581  
0.915373191 0.85468033 1 1.52298204 1.403274682 0.487107872  
1.28121848 1 1.307492102 1.581645694 1.22392285 0.634615979 1

|             |                                                                                                        |             |             |             |             |
|-------------|--------------------------------------------------------------------------------------------------------|-------------|-------------|-------------|-------------|
| 0.445634974 | 0.363868864                                                                                            | 0.221678131 | 0.539789401 | 1           | 0.857327701 |
| 0.763502274 | 0.976788267                                                                                            | 1.055766763 | 0.847747702 | 1           | 1.01790967  |
| 0.755604908 | 1.16104748                                                                                             | 1.834093647 | 0.863144912 | 1           | 0.890825544 |
| 1.238288152 | 1.359806814                                                                                            | 0.801798629 | 0.894433099 | 0.772300393 |             |
| YPL112C     | YPL112C::PEX25::required for regulation of peroxisome size and maintenance                             |             |             |             |             |
| 1           | 1.03662893                                                                                             | 0.954234664 | 0.956989969 | 1.215793693 | 1           |
| 0.935987112 | 0.773534491                                                                                            | 1.065391612 | 1           | 0.886347126 | 0.782879595 |
| 0.625963666 | 0.996092268                                                                                            | 1           | 0.915517189 | 0.756994236 | 0.677647741 |
| 1.505533919 | 1                                                                                                      | 1.203251829 | 1.335756742 | 1.831111284 | 1.86228288  |
| 1.332883916 | 1.162363                                                                                               | 0.831360711 | 0.818485311 | 1.107333564 | 1           |
| 1.072235623 | 1.233074567                                                                                            | 1.110186164 | 0.925884996 | 1.334291311 | 1           |
| 1.195051323 | 1.237582903                                                                                            | 1.008844583 | 1.698337206 | 1.069344058 | 1.363346604 |
| YBR248C     | "YBR248C::HIS7::glutamine amidotransferase:cyclase, also called imidazole glycerol phosphate synthase" |             |             |             |             |
| 1           | 1.533244586                                                                                            | 1.217827292 |             |             |             |
| 1.354764953 | 0.94941494                                                                                             | 1           | 1.391791581 | 1.144759627 | 1.23186768  |
| 1.107093539 | 1                                                                                                      | 2.163864664 | 1.609799629 | 0.515268356 | 1.215275924 |
| 1.018403342 | 0.957786268                                                                                            | 0.419054101 | 0.608965985 | 1           | 1.489075826 |
| 0.342013027 | 0.991229704                                                                                            | 1           | 0.980746674 | 1.024288652 | 0.938853067 |
| 0.989526733 | 0.945367437                                                                                            | 1           | 0.952639295 | 0.883739371 | 0.71692322  |
| 0.943987431 | 1.765700073                                                                                            | 1           | 1.294999016 | 1.041498794 | 1.029148537 |
| 1.069006083 | 1.650653734                                                                                            | 0.934290836 |             |             |             |
| YPL114W     | YPL114W::YPL114W::molecular_function unknown                                                           |             |             |             |             |
| 1.103514621 | 0.942597072                                                                                            | 1.05826546  | 0.92499619  | 0.849049288 |             |
| 1.003611063 | 0.83429731                                                                                             | 0.912809745 | 1.203622947 | 0.87032122  | 1           |
| 1.07383833  | 1.457030727                                                                                            | 1.280293715 | 1           | 1.493576923 | 2.601685628 |
| 1.230532603 | 1.807082686                                                                                            | 1           | 1.47189112  | 1.861253811 | 1.377031308 |
| 0.964027047 | 1.052533073                                                                                            | 1           | 0.934551525 | 1.273944456 | 1.602433349 |
| 0.880609674 | 0.818682229                                                                                            | 1           | 1.04152907  | 1.234870758 | 0.997343878 |
| 1.06114623  | 0.979013769                                                                                            | 1.14706739  |             |             |             |
| YBR250W     | YBR250W::YBR250W::molecular_function unknown                                                           |             |             |             |             |
| 1           | 1                                                                                                      | 1.079736607 |             |             |             |
| 1.375497596 | 1.148346459                                                                                            | 1.464729041 | 1           | 1.071724225 | 1.021604449 |
| 1.569031523 | 1.76450185                                                                                             | 1           | 1.162678263 | 1.058784396 | 1.439049139 |
| 1.313192234 | 1                                                                                                      | 0.546040022 | 0.423810079 | 0.746333714 | 0.850529984 |
| 1.091910604 | 2.557383097                                                                                            | 1.603336261 | 0.67604774  | 1           | 0.67481126  |
| 0.712014874 | 0.631621056                                                                                            | 0.660097775 | 0.852922386 | 1           | 0.949319335 |
| 0.814460544 | 1.207524162                                                                                            | 1.942398399 | 1           | 1.022599902 | 0.984504095 |
| 1.471345832 | 0.984201335                                                                                            |             |             |             |             |
| YPL116W     | "YPL116W::HOS3::Protein with similarity to Hdalp, Rpd3p, Hos2p, and Hos1p"                             |             |             |             |             |
| 1           | 1.139407948                                                                                            | 1.015718795 | 1.151823723 | 1.174416401 | 1           |
| 1.164832311 |                                                                                                        | 1.518502144 | 1           | 1.10655457  | 0.993637266 |
| 0.702825578 | 0.917564609                                                                                            | 2.052228709 |             | 0.852685387 | 1           |
|             | 1                                                                                                      | 0.766209305 | 0.629722904 | 0.694700011 | 0.799999062 |
| 0.826313618 | 1                                                                                                      | 0.850988567 | 0.559410694 | 0.661826587 | 0.735204879 |
| 0.679128641 | 1                                                                                                      | 0.959058988 | 0.747165286 | 1.24451952  | 0.848903563 |
| 0.938740627 | 0.881753341                                                                                            |             |             |             |             |
| YBR252W     | YBR252W::DUT1::dUTP metabolism                                                                         |             |             |             |             |
| 1           | 1                                                                                                      | 1.353236911 | 1.612976437 |             |             |
| 1.151276025 | 1.941525436                                                                                            | 1           | 1.292623373 | 1.049238297 | 2.075919689 |
| 1.756954761 | 1                                                                                                      | 1.243346702 | 1.082064197 | 1.564339991 | 1.643858439 |
| 0.83019869  | 0.340782032                                                                                            | 0.344289912 | 0.660143505 | 1           | 1.235643822 |
| 1.246904573 | 0.767468313                                                                                            | 1           | 0.982357142 | 0.940021583 | 0.80680686  |
| 0.977998451 | 0.773772654                                                                                            | 1           | 0.884753455 | 1.289744982 | 0.979143802 |
| 0.900325368 | 1.416156734                                                                                            | 1           | 0.935863776 | 0.947069874 | 0.854330683 |
| 1.227462948 | 0.964914252                                                                                            | 1.032360714 |             |             |             |
| YPL118W     | YPL118W::MRP51::Mitochondrial Ribosomal Protein                                                        |             |             |             |             |
| 1           | 1                                                                                                      | 0.714847257 |             |             |             |
| 0.949233438 | 0.973250556                                                                                            | 1.06535102  | 1           | 0.95812877  | 0.998495785 |
| 1.148114893 | 1                                                                                                      | 0.811140365 | 0.910433148 | 1.069482004 | 0.931233818 |
| 1.33365635  | 0.939650302                                                                                            | 1.102256262 | 1.144714681 | 0.9848853   |             |

|         |                                                                                                                                      |             |             |             |             |             |             |
|---------|--------------------------------------------------------------------------------------------------------------------------------------|-------------|-------------|-------------|-------------|-------------|-------------|
|         | 0.769334698                                                                                                                          | 1.158234116 | 0.796869201 | 1           | 0.858002413 | 0.98806465  |             |
|         | 0.843194977                                                                                                                          | 0.65527751  | 0.93168078  | 1           | 1.388670928 | 1.072018715 |             |
|         | 1.180311911                                                                                                                          | 0.9812817   | 1.061677257 | 1           | 1.475662855 | 1.2696809   |             |
|         | 1.087940374                                                                                                                          | 1.180565882 | 1.40106549  | 1.20135611  |             |             |             |
| YGL205W | YGL205W::POX1::fatty-acyl coenzyme A oxidase                                                                                         |             |             | 1           |             | 1.524815494 |             |
|         | 1.310318447                                                                                                                          | 1.689543847 | 1           | 1.945598313 |             | 1           |             |
|         | 1.515328738                                                                                                                          |             | 1           | 2.261759564 |             | 1.844593216 |             |
|         | 0.962540145                                                                                                                          |             |             |             |             | 1.054779571 |             |
|         | 1.093172749                                                                                                                          | 1.058300381 | 1           | 1.274773304 |             | 1.088385675 |             |
|         | 1                                                                                                                                    | 0.779651105 | 1.320157978 | 1.064653631 | 1.190107425 | 1.285638588 |             |
| YBR254C | YBR254C::TRS20::Trapp subunit of 20 kDa                                                                                              |             |             | 1           |             | 1.287789403 |             |
|         | 1.405608279                                                                                                                          | 1.230119958 | 1.680423571 | 1           | 1.102071023 | 1.079262502 |             |
|         | 2.028752758                                                                                                                          | 1.697345964 | 1           | 1.128320399 | 1.300725678 | 1.526857175 |             |
|         | 1.429643189                                                                                                                          | 1           | 1.281178105 | 0.631008568 | 0.892681388 | 1.286317774 | 1           |
|         | 1.127512119                                                                                                                          | 1.386624203 | 1.279703167 | 1.173493707 |             | 1.255387127 |             |
|         | 1.295924601                                                                                                                          | 0.902221125 | 1.061662753 | 0.971225066 | 1           | 1.04225291  |             |
|         | 0.85463114                                                                                                                           | 1.16208192  | 1           | 1.249356193 | 1.180647111 | 1.044577693 |             |
|         | 0.887370774                                                                                                                          | 1.456924468 | 1.363346604 |             |             |             |             |
| YGL207W | YGL207W::SPT16::global regulator of transcription                                                                                    |             |             | 1           |             |             |             |
|         | 1.103362859                                                                                                                          | 0.98604247  | 1.465228222 | 0.87270215  | 1           | 1.280792606 |             |
|         | 1.310224194                                                                                                                          | 0.922101762 | 0.855073528 | 1           | 1.073357872 | 1.139852938 |             |
|         | 0.715331519                                                                                                                          | 1.141599775 | 1           | 0.949297404 | 1.10652459  | 0.858953988 |             |
|         | 0.654832119                                                                                                                          | 1           | 0.923239391 | 0.649741155 | 0.475362266 | 0.628059253 | 1           |
|         | 0.915456123                                                                                                                          | 0.897190176 | 1.173722386 | 0.911813288 | 0.945518778 | 1           |             |
|         | 0.976122665                                                                                                                          | 0.685902961 | 0.897891954 | 0.768493861 | 0.5170976   | 1           |             |
|         | 0.86554762                                                                                                                           | 0.796138143 | 0.953975471 | 0.728779424 | 0.770480244 | 0.801195979 |             |
| YBR268W | YBR268W::MRPL37::Probable mitochondrial protein L37                                                                                  |             |             | 1           |             |             |             |
|         | 1.048491827                                                                                                                          | 1.667971142 | 1.199705947 | 2.254142574 | 1           | 1.020675148 |             |
|         | 1.232748717                                                                                                                          | 2.398713192 | 2.019426804 | 1           | 1.205281881 | 1.385260886 |             |
|         | 2.15733841                                                                                                                           | 1.452217661 | 1           | 1.07617189  | 0.763150453 | 0.799748216 |             |
|         | 1.31230722                                                                                                                           | 1           | 1.62175291  | 2.25033128  | 1.952005215 | 1.407066007 | 1           |
|         | 1.024724283                                                                                                                          | 1.115627189 | 0.710595174 | 0.723837817 | 0.834046203 | 1           |             |
|         | 1.016215039                                                                                                                          | 1.726559089 | 1.279916718 | 0.997914963 | 2.306642781 | 1           |             |
|         | 1.109341119                                                                                                                          | 1.578617113 | 0.960913144 | 1.52013419  | 1.503920819 | 1.266152286 |             |
| YPL132W | YPL132W::COX11::Mitochondrial membrane protein required for insertion of Cu(B) and magnesium during assembly of cytochrome c oxidase |             |             |             |             |             | 1           |
|         | 0.99491765                                                                                                                           | 1.239118388 | 1.191872422 | 1           | 1.19138826  | 1.10150528  |             |
|         | 1.32728094                                                                                                                           | 1.442783437 | 1           | 0.946163011 | 0.940134489 | 1.265019045 |             |
|         | 1.123728805                                                                                                                          | 1           | 1.121950253 | 0.995329906 | 0.860005865 | 1.355234923 | 1           |
|         | 1.336354039                                                                                                                          | 2.324153577 | 1.887850286 | 0.937273105 | 1           | 1.141321703 |             |
|         | 1.251207156                                                                                                                          | 0.921167598 | 0.91485471  | 1.037485211 | 1           | 0.794138648 |             |
|         | 0.832758609                                                                                                                          | 0.804307345 | 0.576879881 | 0.812140635 | 1           | 1.176853789 |             |
|         | 1.06320755                                                                                                                           | 0.881548875 | 1.18178551  | 1.360150562 | 1.25652039  |             |             |
| YBR270C | YBR270C::YBR270C::molecular_function unknown                                                                                         |             |             |             |             |             | 1.203980739 |
|         | 1.437413351                                                                                                                          | 1.649375462 | 1.313066758 | 1           | 1.371677862 | 1.34962791  |             |
|         | 1.535371857                                                                                                                          | 1.388663973 | 1           | 1.109224421 | 1.285184695 | 1.841035974 |             |
|         | 1.749302548                                                                                                                          | 1           | 1.253584978 |             | 1.309942229 | 1.352304908 | 1           |
|         | 0.603719057                                                                                                                          | 0.66305382  | 0.680644306 | 0.550660017 | 1           | 0.832051442 |             |
|         | 0.964492641                                                                                                                          | 0.876662636 |             | 0.902041492 | 0.915203521 | 1.076013727 |             |
|         | 1                                                                                                                                    |             | 1.258193362 |             | 1.742528408 | 1.006092019 |             |
| YPL134C | YPL134C::ODC1::Oxodicarboxylate carrier                                                                                              |             |             | 1           |             | 1.056687447 |             |
|         | 1.034463289                                                                                                                          | 1.123102323 | 0.927925491 | 1           | 1.072644634 | 1.184147961 |             |
|         | 1.043750905                                                                                                                          | 1.25642108  | 1           | 0.95488233  | 0.99579348  | 1.589109724 |             |
|         | 1.242484172                                                                                                                          | 1           | 1.475475661 | 1.344262737 | 1.846651989 | 1.958776338 |             |
|         | 0.715962716                                                                                                                          | 0.612783987 | 0.495520689 | 0.759906667 | 1           | 0.850655958 |             |
|         | 0.944787619                                                                                                                          | 0.989347376 | 0.934654381 | 1           | 0.924110147 | 0.61699213  |             |

0.610669726 0.774454853 0.973460913 1 0.855759011 0.615387692  
 0.842870805 0.883879211 1.192334286 1.182967981  
 YGL209W "YGL209W::MIG2::Involved in repression, along with Mig1p, of SUC2  
 (invertase) expression by high levels of glucose; binds to Mig1p-binding sites  
 in SUC2 promoter" 1 1.189276187 1.156011149 1.070364921 1.045544226 1  
 1.226027429 1.237948684 1.064574992 1.099181604 1 1.177847441  
 1.263695617 1.814539165 1.304547822 1 0.825325873 0.736624973  
 0.930631048 1.15441849 1 0.643613963 0.922212666 1.232930373 1  
 0.81820032 0.740459245 0.899623967 1.005355413 0.832449056 1  
 0.538950326 0.534604763 0.724259399 0.834485464 0.605458841 1  
 0.727079857 0.663579536 0.947436713 0.732400695 0.97302513 0.971942653  
 YGL209W "YGL209W::MIG2::Involved in repression, along with Mig1p, of SUC2  
 (invertase) expression by high levels of glucose; binds to Mig1p-binding sites  
 in SUC2 promoter"  
 0.967789317 0.74276359 0.87453862 0.497573422 1  
 1 0.658161296 0.706472188  
 5.794879659  
 YPL136W YPL136W::YPL136W::molecular\_function unknown 1 1.364633968  
 1.227090937 1.852873257 1.111197686 1 1.831884167 1.282254275  
 1.116148581 1 0.749230249 1.525307293 1  
 0.837557549 0.252624231 1 0.898572099  
 0.858530156 0.960191628 0.913821843 1 0.955736943 0.689168198  
 0.741160581 0.884437666 0.901896368 1 0.554879165 0.615284418  
 0.97960572 0.862007691 0.846987232 0.711882332  
 YGL211W YGL211W::YGL211W::molecular\_function unknown 1 0.80835476  
 0.721086566 0.951401584 0.558984192 1 0.838783861 0.786569414  
 0.876732681 0.96863042 1 0.615504711 0.647805802 0.492608829  
 1.080781205 1 0.444861329 0.420849746 0.450396691 0.861444989  
 0.499427632 0.599365399 0.610617178 0.6914172 1 0.846263638  
 0.764644224 1.041509327 1.248636664 1.085890675 1 0.884984159  
 0.535965341 0.548385176 0.935797916 0.589668528 1 0.699019635  
 0.469899115 0.978727346 0.49293442 0.615988337 0.833594067  
 YPL138C YPL138C::SPP1::likely involved in chromatin remodeling<br>member of  
 Set1p complex 1 0.885076163 1.012360679 1.007062864 1.331417173 1  
 1.017064146 1.049639712 1.125156495 1 0.774330454  
 0.826322466 1.187785786 1 1.185837853 1.04722536 1.390534444 1  
 1.409711347 1.034753601 1 1.066860779 1.265930997  
 1.071184128 1.006130012 1.065799977 1 1.064935004 1.100071136  
 1.153708772 1.251500871 1.450540743 1 0.870357374 1.01970641  
 1.150613214 1.125972294 1.155588977 1.093654335  
 YGL225W YGL225W::VRG4::May regulate Golgi function and glycosylation in  
 Golgi 1 2.082732847 1.114896585 1.66987256 1.406219185 1 1.478600827  
 1.339833138 1.393443007 1.500800265 1 1.286826903 0.79282765  
 0.757684138 1.403457776 1 0.538471055 0.404341075 0.33217965  
 0.483762814 1 0.266421163 0.266844215 1 0.952226005  
 0.570086187 0.893740466 1.411089632 0.697497609 1 0.58672869  
 0.533880295 0.512756163 0.412326397 0.612843842 1 0.910435257  
 0.52694911 0.622144153 0.868300429 0.793027159 0.633076143  
 YPL140C "YPL140C::MKK2::Member of MAP kinase pathway involving PKC1, BCK1,  
 and SLT2. Shows functional redundancy with MKK1" 1 0.951594677  
 1.023778634 1.09474448 1.128027463 1 1.033882088 1.107282066  
 1.063797793 1.147354331 1 0.963148045 0.999578446 0.973311787  
 0.990841949 1 0.64186011 0.538958162 0.577204914 0.754298608 1  
 1.193039273 1.24700186 1.073869848 1.471526164 1 0.954582793  
 0.919819956 1.168823867 0.96788974 1.05397361 1 0.984025831

0.800717566 1.0513387 0.851553389 0.706596834 1 0.875050122  
 0.806657843 1.0832146 0.877981025 0.974071995 1.036738829  
 YGL227W YGL227W::VID30::vacuole import and degradation (VID); TOR inhibitor  
 (TIN) 1 1.39506667 1.473745209 1.395531474 1 1.366856231  
 1.345588222 1.427685659 1.162315075 1 1.444336003 1.513403357  
 1.222764849 1.3225697 1 1.636480138 1.202081197 1.065896954 1  
 1.513090595 1.838601984 1 1.062600961 1.459638431  
 1.152192145 0.93577067 1.250782882 1 1.520319241 1.233786368  
 1.321101139 1.163813767 0.93387447 1 1.520703343 1.311308919  
 1.046943709 1.076172544 1.309655849 1.251266714  
 YGL229C "YGL229C::SAP4::SAP4 is related to SAP155, SAP185, and SAP190, all  
 of which associate with the SIT4 protein phosphatase" 1 1.20077867  
 1.122629002 1.219037035 1.071897502 1 1.214829621 1.265807178  
 0.974943634 0.860805026 1 1.184248636 1.361691653 0.964075928  
 0.92371189 1.478907712 0.989833538  
 1 1.237617575 1.503326804 1.33664131 1.052594545 1.001558003 1  
 0.95305274 1.296953367 1.33036951 0.833421586 0.7929747 1  
 1.859743986 1.770674295 1.158257562 1.233446135 1.953987652 0.833594067  
 YGL231C YGL231C::YGL231C::molecular\_function unknown 1 0.898499934  
 1.184928762 0.994826865 1.444529588 1 0.875136383 0.893804068  
 1.409129156 1.142305928 1 0.888104818 1.056716991 1.335586367  
 1.147083646 1 0.840398255 0.669706683 0.642606026 1.235370491 1  
 1.349361771 1.139991043 1.83106207 1.383611119 1 1.072152213  
 1.208130928 0.797985631 0.790241308 1.042091524 1 0.888862404  
 1.547169142 1.351220768 1.187822921 1.917648521 1 1.325770509  
 1.584143238 1.26732492 1.818303944 1.422341414 1.439525903  
 YGL233W YGL233W::SEC15::Protein involved in vesicle traffic between Golgi  
 and plasma membrane. The Exocyst complex is required for exocytosis. 1  
 1.216387031 1.130683381 1.365176871 1.059344867 1 1.304128969  
 1.38869778 1.083945498 1.012091998 1 1.371865739 1.269109251  
 0.785066959 1.088489973 1.351399652 0.932810485 1  
 1 1.015341132 0.895251458 0.80314611 1.086983519  
 0.998941772 1 0.860462207 0.717229569 0.598833222 0.873723261  
 0.567218729 1 0.839543354 0.960444609 1.237591274 1.079636325  
 0.971705606 0.80995221  
 YGL235W YGL235W::YGL235W::molecular\_function unknown 1 1.01637453  
 0.872645818 0.774553224 1 1.399346643 1.134986266  
 1.2118773 1 1.087832158 0.975236163 0.882094262 1.037841199 1  
 0.358281689 0.689860719 0.891818272 1 1.398160172  
 1.12366678 0.538403148 1 0.912180907 1.125128843 1.29124735  
 1.016258689 1 0.904585478 0.597762508 0.761661971 0.596980635 1  
 0.931844282 0.735262737 1.032767496 0.648251267 1.07438414 0.863365265  
 YML100WA YML100WA::YML100W-A::molecular\_function unknown 1 1.055742192  
 1.220897489 0.889425866 1.325955417 1 0.879687259 0.943046298  
 1.368767911 1.380949036 1 0.918884284 1.004044589 1.653843197  
 1.207992645 1 0.652623267 0.662304257 0.995362611 1.235012422 1  
 1.635516774 3.191934602 1.760765129 0.935822393 1 0.751499282  
 0.938323103 0.76283206 0.723614774 0.802377185 1 0.830035444  
 1.111844339 0.84752399 0.863648673 1.260075617 1 0.833082064  
 1.30629563 0.942434008 1.411474265 0.890303452 1.189097427  
 YML102CA YML102CA::YML102C-A::molecular\_function unknown 1 1.388277065  
 1.55425743 1.046344737 1.32690845 1 1.123242459 1.197194778  
 1.621813619 1.729226974 1 1.303184357 1.876855754 1.328247961 1  
 1.190083121 0.811528461 1.455587353 1 1.378513407 2.388965024  
 1.35004455 0.99189629 1 0.879509602 1.044042979 1.001360838  
 0.984925455 0.932607641 1 0.944874862 1.188191571 0.921413071



1.168891827 1.48609334 1 0.838281376 1.331384003 1.136157174  
1.359278206 0.913901719 1.436023347  
YMR304CA YMR304CA::YMR304C-A::molecular\_function unknown 1 1.56957736  
1.502957212 0.898430207 1.660027261 1 1.06577466 0.837477247  
1.717074533 1.690971303 1 1.069268381 0.796670801 1.282345108  
1.329604043 1 0.816774042 0.367226765 0.404652566 1.354716752  
0.424920966 0.677640721 0.242308404 0.427243669 1 0.625749568  
0.527552245 0.413097366 0.490641112 0.522852977 1 0.819485702  
1.220270708 0.705642356 0.462332873 1.136903048 1 0.982590092  
1.494107227 1.104894811 2.456523578 1.409704152 1.364222164  
YBR272C YBR272C::HSM3::Involved in DNA mismatch repair pathways 1  
1.206912999 1.386340921 1.348319378 1.26491381 1 1.437338069  
1.647243274 1.282168908 1 1.282267987 1.535405748 1.125279397  
0.461513039 1 1.310041003 0.852513512 0.747009439 1.345766781 1  
2.219321844 2.07045332 2.099986434 1.837317655 1 1.127776373  
1.176506203 1.329726532 0.948654601 1.004599222 1 1.245722429  
1.281546824 1.569962207 1.167215518 1.252606259 1 1.226214998  
1.055681383 0.414845083 1.379371996 0.981574549  
YBR274W YBR274W::CHK1::checkpoint kinase 1; homolog of the S. pombe and  
mammalian Chk1 checkpoint kinases 1 1.248919338 1.40673953  
0.85507306 1 1.334854219 1.31190621 1.061528882 1.053378981 1  
1.047142414 1.053427853 0.622712036 1.103342638  
0.852685387 1 1.097006447 1.226539805 1.840157395 1  
1.010160608 1.023688209 0.90781602 0.850377408 0.89571697 1  
1.006777699 1.062044971 0.998656332 0.791438929 1.128119545 1  
1.129400052 1.100483562 1.003712772 1.069182613 1.018062339 1.272281628  
YBR276C YBR276C::PPS1::Protein Phosphatase S phase 1 1.155984337  
1.148021873 1.60482489 0.958159143 1 1.463478886 1.550678189  
0.957839394 0.96549748 1 1.055495173 1.132053587 0.522493507  
1.26723163 1 1.136458281 0.799859449 0.539980257  
0.395816784 0.639234791 1 0.977606206 0.912592821  
1.092626876 1.048534681 1.034818528 1 1.211496141 0.774298595  
0.704319587 0.896202249 0.823800127 0.845987432 0.87273238  
0.783076945 0.854087467 0.949176408  
YPL142C YPL142C::YPL142C::molecular\_function unknown 1 1.525396849  
1.583851123 1.555100813 1.573125506 1 1.530266861 1.462242517  
1.450552867 1.503935363 1 1.418083352 1.326933207 1.30493788  
1.335497334 1 0.665510606 0.487485052 0.442553553 0.86999341 1  
0.91798781 0.995531191 0.637437159 0.685504512 1 0.935636491  
0.816419477 0.74995459 0.928180486 1.022876966 1 0.899208471  
1.006959063 0.872373053 0.828502812 0.893728584 1 0.95235292  
1.155686167 1.020153664 1.291977039 1.042764696  
YBR278W YBR278W::DPB3::C and C' subunits of DNA polymerase II 1  
1.406692823 1.636110765 1.442884914 1.654064113 1 1.426951046  
1.396592719 1.563886918 1.579685168 1 1.267441411 1.394023688  
1.590382723 1.460389885 1 1.116504973  
1.192021437 0.331575878 1 0.966279097 1.208325064 0.775906571  
0.676676203 1.002977983 1 1.208280859 1.264916308 1.330304485  
2.127156895 1 1.123696941 1.431521802 1.238752455 1.796788998  
1.296809292 1.25827172  
YPL156C YPL156C::PRM4::pheromone-regulated membrane protein 1  
1.298174978 1.370491381 1.057900499 1.762018424 1 1.005865768  
1.643479618 1.545038736 1 1.086582322 1.196127431 1.381619379  
1.277618702 1 1.110412049 0.919937971 1.832262469 1  
1.595217178 1.900553572 1.054052972 1.834209016 1 1.227018537  
1.176106281 1.10382158 0.784337716 0.926396108 1 1.338907581

1.440861367 2.169687486 1.461829167 1.425675651 1 1.39222648  
1.394576739 1.151310706 1.270559868 0.933070484 1.404500872  
YBR292C YBR292C::YBR292C::molecular\_function unknown 1.073682238  
0.972550541 0.827428051 1.01127497 0.842666664 0.945706904  
1.038784293 1.051933046 0.972945002 0.979445941 1.168566  
0.958430204 1 1.427182378 0.536864019 1.092397923 1.037720838 1  
1.570931449 2.397910561 1.854530566 1.023476442 1 0.897664529  
0.736314081 0.626328491 0.744368233 0.857212328 1 0.994584641  
1.066201101 0.79816852 0.790181998 1.363053467 0.853343261  
0.814601704 0.852443929 0.844676016 1.182092421  
YPL158C YPL158C::YPL158C::molecular\_function unknown 1 0.586971852  
0.616668022 0.841240055 0.733538288 1 0.752542301 0.818986311  
0.61139188 0.680017598 1 0.55337316 0.654204273 0.511363441  
0.537300871 1 0.969814058 0.862297418 1.097148108 0.755731856 1  
0.815156783 1.900734715 1.37626783 0.824501944 1 0.784333082  
0.798359987 0.606711702 0.580934451 0.833187383 1 0.722558549  
0.875099041 0.651553733 0.470291867 1.390870503 1 0.936934375  
0.924270764 0.884748566 1.026388666 1.290650666  
YBR294W YBR294W::SUL1::Putative sulfate permease 1 0.959802764  
0.736073209 1.052721316 0.669348155 1 0.882492523 0.977660895  
0.669641895 0.710144683 1 0.788646978 0.904399782 0.457730502  
0.802014417 1 1.277605291 0.874266614 0.596273185 1  
1.085647309 1.010600344 1.231587376 1.14989222  
1.072653561 1 1.169822898 0.891162267 0.888193972 0.799311971 1  
0.818417488 0.654261589 0.918674754 0.846218816 0.72238979  
YPL160W YPL160W::CDC60::cytosolic leucyl tRNA synthetase 1  
0.96329135 0.815796484 1.207792823 0.822844667 1 1.177438345  
1.044338051 0.743216638 0.707912975 1 0.914955074 0.784333754  
0.384561701 0.993724274 1 0.51916416 0.407419027 0.398450593 1  
0.473880657 0.393764462 0.315729924 0.470620727 1 0.84338859  
0.651864995 0.922996804 1.153328614 0.742124019 1 1.016554045  
0.562156033 0.818245877 0.755206047 0.398826318 1 0.955843645  
0.632366357 0.979349577 0.702333027 0.580590328  
YBR296C YBR296C::PHO89::Probable Na<sup>+</sup>/Pi symporter 1.886331617  
1.08301589 1.172935182 0.786112081 1.29063603 0.994035679  
0.865211936 0.897054796 1.628808773 0.915982918 0.543383194  
0.571729568 0.61219052 0.534991309 1 0.762075468  
2.638132863 1 1.298071996 0.770199078 1.501987933 1  
0.428224822 0.442082523 1.433672301 2.340939618 1 0.68509842  
0.388758912 0.494261083 1.028770983 0.832165088 0.249552837  
YGL249W YGL249W::ZIP2::Required for 'ZIPpering' up meiotic chromosomes  
during chromosome synapsis 1 1.923030274 1.159964208 1.392476609  
1.248001624 1 1.408495809 1.293278508 1 1.135338178  
1.199322216 1.039048568 1.041067823 1  
1 0.699050243 1.01224432 1.139182419  
1.032769347 1 0.703437538 0.89671638 1.657463252 1  
0.758334575 1.192567629 0.511552849 1.110709851 1.144440604  
YBR298C "YBR298C::MAL31::Part of the complex locus MAL3; functional in  
S288C; highly homologous to MAL61 from *S. cerevisiae*, MAL61 from *S.*  
*carlsbergensis* strains JM1901 and CB11, and MAL1T from strain 4059"  
1.294082636 0.990771665 1.033166932 0.837018514 1.081180112  
0.943510168 0.916886123 0.77563026 0.968122464 1.125410899  
1.029506625 0.724451869 0.819030076 0.803174604  
0.618172698 1.047677578 0.95169467 1.162885249  
0.837695542 0.975052619 1 0.800048646 0.778856758 1.230293156  
0.680870626 1.171433211 1 0.6923823 0.874084244  
1.207972577 0.830967177

YPL162C YPL162C::YPL162C::molecular\_function unknown 1 1.079550089  
0.765122712 0.945430634 0.771076853 1 0.906584452 0.569241568  
0.854155922 1 0.902768604 0.749308411 0.459315495 0.702484705 1  
0.690861838 0.864366339 0.649072695 0.459845977 0.554636615  
0.562048299 1 1.10450389 0.962664961 1.135652554 1.279193971  
1.054075149 1 0.765009735 0.635240142 0.712901194 0.671148067  
0.479193564 1 0.890669294 0.782182318 0.864515852 0.829653573  
0.68642957 1.245137372  
YBR300C YBR300C::YBR300C::molecular\_function unknown 1 1.778588575  
1.784003934 1.539796493 1.71905192 1 1.671701867 1.464561153  
1.814973025 1.597926159 1 1.436268153 1.572181427 1.898720924  
1.610306653 1 0.966474664 0.877338075 0.671355334 0.922698129 1  
1.317316307 2.226298809 1.267065787 0.929601521 1 0.87764595  
0.91641661 0.719705731 0.785715833 0.817609066 1 0.924596537  
1.215023145 1.068101636 0.941125011 1.500172447 1 0.973548666  
1.3264326 0.987185187 1.180490455 0.992661488 1.443028354  
YPL164C YPL164C::MLH3::Mutl Homolog 1 1.282480381 1.292192782  
1.485072607 1 1.412535424 1.7173761 1.530264486 1  
1.420620861 1.457128581 1.363345748 1.358640593 0.686868385  
0.725160671 1 1.015784025 1.864102588 0.857652322  
1.032841172 1.055699906 1.041646124 1.02675876 1.011413743 1  
1.054460619 1.065455311 0.994281757 1.216937912 0.785495012 1  
1.137792887 1.108368274 0.947870498 1.053616301 1.239646795 2.643508903  
YGL251C YGL251C::HFM1::DNA helicase that functions in meiotic crossing over  
1 1.321320481 1.142248547 1.256804035 1 1.099372266  
1.059461283 1.264545382 1.196522683 1 1.232440181 1.218782897  
1.236834953 1.288586167 0.711067023 0.801549975 0.653267017 1  
0.825339802 1.130510772 0.866550041 0.89158067 1 0.947282279  
1.033945744 0.86851883 0.877431627 0.96423681 1 0.80287605  
0.891235968 0.755986192 1 1.170847895 1.008875985  
1.099967826 0.991170218 1.216341058 0.892260903  
YBR302C "YBR302C::COS2::Protein with similarity to members of the  
Cos3/Cos5/Cos1/Cos4/Cos8/Cos6/Cos9 family, coded from subtelomeric region" 1  
1.526502571 1.092822471 1.40749593 1.141710966 1 1.599240302  
1.308822213 1.241232596 1.218825555 1 1.360204364 1.216119274  
1.239875585 1.198821009 1 1.175942342 1.159625134 1.245637595  
1.595333816 1 1.293867897 0.79794773 1.515150641 2.415375767 1  
1.053206278 1.176212239 1.346323982 1.135933177 0.982923101 1  
0.951235274 1.100113633 1.216496741 0.733452776 0.933919393 1  
1.297409042 1.178667592 0.96914836 1.141154481 1.306921214 1.120798695  
YPL166W YPL166W::YPL166W::molecular\_function unknown 1 0.757360249  
0.89666077 1.102312455 0.875286325 1 1.031491921 1.19080268  
0.921671078 0.885080564 1 1.265313783 1.485383459 0.781140741  
1.066862979 1 1.558667097 1.280969234 0.812588582  
0.554636615 1 1.146091913 1.518923926  
1.197027487 1 1.231124703 0.95924445 1.301209633 1.043152255  
1.234507757 1 1.09673934 0.835710991 1.275731761 0.855373119  
YGL253W YGL253W::HXK2::Glucose phosphorylation 1 1.164115386  
0.896472328 1.228422551 0.786529381 1 1.251531038 1.178853653  
0.84812429 0.766709945 1 1.170435656 0.956022265 0.763413685  
0.835208008 1 3.053794973 2.518295105 2.426046421 1.196913746 1  
1.843391873 0.835780722 0.791767356 1.314729265 1 1.138300153  
0.663748644 1.256791347 1.121205417 0.801472038 1 1.341596634  
0.839734306 0.676712947 0.545056995 0.377854404 1 1.524859399  
0.955601997 0.870228848 0.594602867 0.753594342 1.182092421  
YPL180W YPL180W::SHD7::molecular\_function unknown 1 0.866298353  
0.947434912 1.140541626 0.933304202 1 1.113287517 1.13787069

|             |                                                                                                                                      |             |             |             |             |
|-------------|--------------------------------------------------------------------------------------------------------------------------------------|-------------|-------------|-------------|-------------|
| 0.978367436 | 0.871743293                                                                                                                          | 1           | 1.05821067  | 1.04732468  | 0.632617119 |
| 1.052180758 | 1                                                                                                                                    | 0.631879867 | 0.77169439  | 0.8038942   | 0.823766923 |
| 0.819675774 | 0.849535198                                                                                                                          | 0.582315841 | 0.81699575  | 1           | 0.911965431 |
| 0.976120046 | 0.985918601                                                                                                                          | 0.928281004 | 0.97427743  | 1           | 1.033986959 |
| 1.045643564 | 1.042492544                                                                                                                          | 1.088665358 | 0.800248961 | 1           | 1.040598804 |
| 0.937571755 | 1.087686973                                                                                                                          | 0.641406095 | 0.928689077 | 0.897514579 |             |
| YGL255W     | YGL255W::ZRT1::High-affinity zinc transport protein 1                                                                                |             |             |             |             |
| 1.872373359 | 0.918892634                                                                                                                          | 4.70191633  | 32.52315795 | 1           | 1.333865513 |
| 1.482790319 | 4.934323848                                                                                                                          | 38.00967738 | 1           | 1.721114207 | 0.738565659 |
| 1.214884957 | 19.47479584                                                                                                                          | 1           | 1.204270973 | 0.595108715 | 0.583062806 |
| 0.77817788  | 1                                                                                                                                    | 0.749377338 | 0.173967944 | 0.233331196 | 0.701991586 |
| 1.74300205  | 0.92330945                                                                                                                           | 1.165201686 | 2.092122756 | 1.58676637  | 1           |
| 2.186735702 | 1.283748341                                                                                                                          | 0.860510386 | 1.150071538 | 0.804463829 | 1           |
| 2.287777477 | 1.407475867                                                                                                                          | 1.021928997 |             | 0.919348899 | 0.751285375 |
| YPL182C     | YPL182C::YPL182C::molecular_function unknown 1 1.142636778                                                                           |             |             |             |             |
| 1.024502243 | 1.459873577                                                                                                                          | 1.116277064 | 1           | 1.410423911 | 1.271415012 |
| 1.048089603 | 1.330242299                                                                                                                          | 1           | 1.042950863 | 1.429271368 | 0.908499873 |
| 1.262481909 | 1                                                                                                                                    | 0.971889463 | 0.637458956 | 1           | 1.114964954 |
| 0.711174711 | 1                                                                                                                                    | 0.877554222 | 0.825555298 |             | 1.040261463 |
| 1.064612619 | 0.761315871                                                                                                                          | 1.019754191 | 1.088305898 | 1.023471495 | 1           |
| 0.928029103 | 0.673392026                                                                                                                          | 1.12831309  | 0.8589437   |             | 0.80995221  |
| YGL257C     | YGL257C::MNT2::MaNnosylTransferase; involved in adding the 4th and 5th mannose residues of O-linked glycans 1 1.12600527 0.992151312 |             |             |             |             |
| 1.101958915 | 1.068012574                                                                                                                          | 1           | 1.046737907 | 1.126365415 | 1.044050667 |
| 1.03132513  | 1                                                                                                                                    | 0.909866344 | 0.906234747 | 0.66401386  | 1.0593424   |
| 1.237003608 | 0.643176104                                                                                                                          | 0.723060842 | 0.837115672 | 1           | 1.431562505 |
| 0.890869514 | 0.675307948                                                                                                                          | 1.023015015 | 1           | 0.733027744 |             |
| 0.890983345 | 0.889709829                                                                                                                          | 1           | 1.1217096   |             | 1.190432083 |
| 0.925096073 | 1                                                                                                                                    | 1.015448916 | 1.261960214 | 1.298637245 | 0.75594865  |
| 7.932277829 |                                                                                                                                      |             |             |             |             |
| YGL257C     | YGL257C::MNT2::MaNnosylTransferase; involved in adding the 4th and 5th mannose residues of O-linked glycans                          |             |             |             |             |
|             |                                                                                                                                      |             | 1           | 0.985883784 | 0.811465354 |
| 0.890373462 | 1.071280072                                                                                                                          | 1           | 1.063581277 | 0.988733071 | 0.731771151 |
| 0.724998694 | 0.89106532                                                                                                                           | 1           | 1.037468681 | 0.997527024 | 0.905529916 |
| 1.19031541  | 0.839275871                                                                                                                          | 1.041116945 |             |             |             |
| YPL184C     | YPL184C::YPL184C::molecular_function unknown 1 1.047941013                                                                           |             |             |             |             |
| 0.834182956 | 0.978515299                                                                                                                          | 0.784629583 | 1           | 1.012612334 | 0.999531987 |
| 0.676814895 | 0.794257134                                                                                                                          | 1           | 0.997135969 | 0.85676347  | 0.66938023  |
| 0.816517049 | 1                                                                                                                                    | 0.908891944 | 0.638650543 | 1.072225348 | 0.813101663 |
| 0.440381909 | 0.489308888                                                                                                                          | 0.303057999 | 0.433471077 | 1           | 0.945611768 |
| 0.857104925 | 1.316266229                                                                                                                          | 1.351234964 | 0.632875481 | 1           | 0.804464179 |
| 0.562387676 | 0.82280253                                                                                                                           | 0.806923203 | 0.509566649 | 1           | 0.655588278 |
| 0.647229805 | 0.993228781                                                                                                                          | 0.766489694 | 0.758039773 | 0.723265402 |             |
| YGL259W     | YGL259W::YPS5::Gpi-anchored aspartic protease (Yapsin 5) 1                                                                           |             |             |             |             |
| 1.252557128 | 1.383937219                                                                                                                          | 1.251887418 | 1           | 1.359283004 | 1.554975011 |
| 1.378708209 | 1.13828862                                                                                                                           | 1           | 1.297438472 | 1.842069587 | 1.729531117 |
| 1.628559213 | 1.240644377                                                                                                                          |             |             |             |             |
| 1           | 1.045520653                                                                                                                          | 1.234629909 | 1.515334613 | 1.180441938 | 1.098884829 |
| 0.811422027 | 1.168517675                                                                                                                          |             | 1.573901863 | 1           | 0.906029998 |
| 0.883481044 | 0.961700401                                                                                                                          | 1.284069679 |             |             |             |
| YGR010W     | YGR010W::NMA2::NAD(+) salvage pathway 1 1.006552206                                                                                  |             |             |             |             |
| 1.038021154 | 1.116297866                                                                                                                          | 0.84430312  | 1           | 1.1097523   | 1.269413303 |
| 1.107515093 | 0.977427932                                                                                                                          | 1           | 1.215959    | 1.356438869 | 1.050806942 |
| 1.073407271 | 1                                                                                                                                    | 1.181680824 | 1.039609975 | 1.349769468 | 1.270657498 |
| 1.282059076 | 1.086410031                                                                                                                          | 1.261941084 | 1.030826403 | 1           | 1.207107413 |

|             |                                                                                                                    |             |             |             |             |
|-------------|--------------------------------------------------------------------------------------------------------------------|-------------|-------------|-------------|-------------|
| 1.468976471 | 1.476246718                                                                                                        | 0.833146878 | 0.771057676 | 1           | 1.349558592 |
| 2.346537035 | 1.760079552                                                                                                        | 0.746192578 | 0.693436683 | 1           | 1.642919497 |
| 2.509212876 | 1.321555319                                                                                                        | 0.97796978  | 1.231166725 | 0.917653933 |             |
| YGR012W     | YGR012W::YGR012W::not yet annotated                                                                                | 1           | 0.913555471 | 1.032151982 |             |
| 0.888229504 | 0.999489305                                                                                                        | 1           | 0.917666282 | 0.924256605 | 1.103158885 |
| 0.944619404 | 1                                                                                                                  | 0.828101223 | 0.889098293 | 0.903361683 | 1.031695798 |
| 1.143619162 | 1.061840592                                                                                                        | 0.903457725 | 1.156325274 | 1           | 1.505580527 |
| 1.847212558 | 1.267793121                                                                                                        | 1.412836921 | 1           | 1.047778211 | 1.096252706 |
| 1.087288615 | 0.989146883                                                                                                        | 0.880371958 | 1           | 0.932513409 | 1.025250183 |
| 0.856432177 | 0.959595964                                                                                                        | 1.145198633 | 1           | 1.132825934 | 1.163019559 |
| 1.153223229 | 1.141401311                                                                                                        | 0.970050549 | 1.25914728  |             |             |
| YGR014W     | YGR014W::MSB2::putative integral membrane protein                                                                  | 1           |             |             |             |
| 1.134450397 | 0.855172177                                                                                                        | 1.206871257 | 0.707330229 | 1           | 1.175689853 |
| 1.233311544 | 0.750341346                                                                                                        | 0.759954037 | 1           | 0.998447634 | 0.862807435 |
| 0.538331097 | 0.921112175                                                                                                        | 1.114997725 | 1.088816834 | 0.82380407  | 1           |
| 0.427010158 |                                                                                                                    | 1           | 0.992127021 | 0.73431644  | 1.027347079 |
| 1.412791681 | 0.571840213                                                                                                        | 1           | 0.623796616 | 0.461653413 | 0.501086633 |
| 0.716484679 | 0.324678592                                                                                                        | 1           | 0.816014598 | 0.827098048 | 0.992147505 |
| 0.627352484 | 0.796683379                                                                                                        | 0.666349844 |             |             |             |
| YGR016W     | YGR016W::YGR016W::molecular_function unknown                                                                       | 1           | 1.258813858 |             |             |
| 1.254693425 | 1.147240695                                                                                                        | 1.364367461 | 1           | 1.252583697 | 1.140378713 |
| 1.579559181 | 1.168354095                                                                                                        | 1           | 1.28412706  | 1.245441317 | 1.014844773 |
| 1.35124161  | 1                                                                                                                  | 1.077647153 | 0.95155692  | 1.122330093 |             |
| 0.346921775 |                                                                                                                    | 1           | 1.253549615 | 1.477972437 |             |
| 1.190506158 | 1.298847154                                                                                                        | 1           | 1.048446683 | 1.13003775  | 0.971503734 |
| 1.133025027 | 1.91390808                                                                                                         | 1           | 1.379795122 | 1.073020011 | 1.148648231 |
| 1.58347474  | 1.188221762                                                                                                        |             |             |             |             |
| YCL014w     | YCL014w::BUD3::cell cycle regulated protein required for axial bud formation; co-assembles with Bud4p at bud sites | 1           | 1.113350066 | 1.124518979 |             |
| 1.353319148 | 1.090964143                                                                                                        | 1           | 1.31849452  | 1.306157093 | 1.117699183 |
| 0.982270613 | 1                                                                                                                  | 1.358864001 | 1.442814161 | 1.447283196 | 1           |
| 1.270615561 | 0.7585958                                                                                                          | 0.828387851 |             | 0.828600275 |             |
| 0.622927797 | 1                                                                                                                  | 0.896323728 | 0.943905883 | 0.918087594 | 1.018588741 |
| 0.86152838  | 1                                                                                                                  | 1.196063181 | 1.020857051 | 0.818038746 | 0.915515029 |
| 0.795218484 | 1                                                                                                                  | 1.021037906 | 0.845446171 | 1.02449952  | 0.705224535 |
| 0.842515639 | 0.983325775                                                                                                        |             |             |             |             |
| YCL017c     | YCL017c::NFS1::Nifs-like protein                                                                                   | 1           | 1.321064128 | 1.138053297 |             |
| 1.10279733  | 0.806351868                                                                                                        | 1           | 1.268830124 | 1.23191685  | 1.008006928 |
| 0.986731802 | 1                                                                                                                  | 1.722810203 | 1.532785262 | 0.911202289 | 1.067799026 |
| 1.203705377 | 1.256090637                                                                                                        | 1.088117568 | 0.900059774 | 1           | 1.343249272 |
| 1.086839017 | 0.859606472                                                                                                        | 1.257385371 | 1           | 1.3185042   | 1.346426101 |
| 1.937556814 | 1.408308397                                                                                                        | 0.873006655 | 1           | 1.285773728 | 1.518298899 |
| 1.915441025 | 1.434918785                                                                                                        | 0.853194344 | 1           | 1.450128949 | 1.585964003 |
| 1.369904895 | 0.876756609                                                                                                        | 0.814280405 | 0.890509573 |             |             |
| YCL019W     | YCL019W                                                                                                            | 1           | 0.803725168 | 0.690116121 | 1.438831065 |
| 1.18545789  | 1.180229042                                                                                                        |             | 0.624542514 | 1           | 1.466847299 |
| 0.346421911 | 1.348569758                                                                                                        | 1           | 0.917851011 | 1.164320082 | 0.77309894  |
| 0.541683061 | 1                                                                                                                  | 0.456200117 | 0.300491848 | 0.342409778 | 0.779654758 |
| 1.040580063 | 1.071264013                                                                                                        | 1.195683329 | 1.095548537 | 1.19642905  | 1           |
| 1.144360544 | 1.519162751                                                                                                        | 2.040613799 | 2.955097556 | 1.564523539 | 1           |
| 1.361897908 | 1.760830131                                                                                                        | 2.373601513 | 1.386334347 | 1.274021576 | 0.777554122 |
| YPL186C     | YPL186C::UIP4::Ulp1 Interacting Protein                                                                            | 4           | 1           | 1.328990127 |             |
| 2.299867458 | 2.953658871                                                                                                        | 3.200539128 | 1           | 1.905176587 | 3.492497916 |
| 1           | 1.195140796                                                                                                        | 2.517632708 | 7.335410058 | 3.698352786 | 1           |
| 6.060195575 | 9.469962083                                                                                                        | 11.1495025  | 1           | 3.377666903 | 4.585957378 |
| 12.26447958 | 5.775322506                                                                                                        |             | 1.140376805 | 0.995732937 |             |

|         |                                                                                                                                                  |             |             |             |             |             |             |
|---------|--------------------------------------------------------------------------------------------------------------------------------------------------|-------------|-------------|-------------|-------------|-------------|-------------|
|         | 0.978880058                                                                                                                                      | 1           | 0.965614936 | 0.964697206 | 1.52253987  | 1.440334919 |             |
|         | 1.30517889                                                                                                                                       | 1           | 1.067652683 |             | 2.447722856 | 1.430769567 |             |
| YCL021W | YCL021W                                                                                                                                          | 1           | 1.042839632 | 1.358048277 | 0.962167027 | 1.417274315 | 1           |
|         | 0.988511776                                                                                                                                      | 0.804998492 | 1.390023096 | 1.382401905 | 1           | 1.056509656 |             |
|         | 1.24700147                                                                                                                                       | 1.922692238 | 1.147551356 | 1           | 1.007001728 | 1.316479517 |             |
|         | 1.41771571                                                                                                                                       | 1           | 0.917623959 | 2.279192903 | 1.333093985 | 0.946922976 | 1           |
|         | 0.653886611                                                                                                                                      | 0.768585755 | 0.604883777 | 0.570665764 | 0.980321273 | 1           |             |
|         | 1.262022216                                                                                                                                      |             | 2.039822144 | 2.68997858  | 3.333904459 | 1           | 1.185699646 |
|         | 2.397602991                                                                                                                                      | 1.70388416  | 1.996074585 | 1.513228594 | 1.80378539  |             |             |
| YPL188W | YPL188W::POS5::involved in oxidative stress                                                                                                      |             |             |             |             | 1           | 1.39600083  |
|         | 1.020206436                                                                                                                                      | 1.138176123 | 1.103853138 | 1           | 1.183570786 | 1.116921786 |             |
|         | 1.117076141                                                                                                                                      | 1.209952336 | 1           | 1.349453363 | 1.244072761 | 0.884871421 |             |
|         | 0.93474973                                                                                                                                       | 1           | 1.407669373 | 1.04678826  | 0.963535919 | 0.7905761   |             |
|         | 0.803275227                                                                                                                                      | 0.415977478 | 0.378001112 | 0.666413116 | 1           | 0.831144071 |             |
|         | 0.997310823                                                                                                                                      | 0.895287181 | 1           | 0.938425627 | 0.466517705 | 0.577715332 |             |
|         | 0.803728652                                                                                                                                      | 0.693068833 | 1           | 0.762873198 | 0.441979702 | 0.847461782 |             |
|         | 0.713372323                                                                                                                                      | 0.784377709 | 1.003465128 |             |             |             |             |
| YCL023C | YCL023C::YCL023C::molecular_function unknown                                                                                                     |             |             |             |             | 1           | 1.312389158 |
|         | 1.923045201                                                                                                                                      | 1.277381689 | 1           | 1.657823915 | 2.236128847 |             | 1.540744305 |
|         |                                                                                                                                                  | 1.386785186 | 1.098570887 | 1.611380774 | 1           |             |             |
|         | 0.644023313                                                                                                                                      |             |             |             |             | 1           |             |
|         | 2.482273144                                                                                                                                      |             |             |             |             |             | 1           |
| YPL190C | YPL190C::NAB3::May be required for packaging pre-mRNAs into ribonucleoprotein structures amenable to efficient nuclear RNA processing            |             |             |             |             |             | 1           |
|         | 0.649598947                                                                                                                                      | 0.694809153 | 0.814354068 | 0.672266528 | 1           | 0.866592828 |             |
|         | 0.899320144                                                                                                                                      | 0.615915601 | 0.658590603 | 1           | 0.718059669 | 0.729137141 |             |
|         | 0.692125614                                                                                                                                      | 0.690380114 | 1           | 0.952200785 | 0.791271317 | 0.862814687 |             |
|         | 0.960312071                                                                                                                                      | 1           | 0.959074397 | 1.169340126 | 1.111148165 | 0.964886268 | 1           |
|         | 0.797305117                                                                                                                                      | 0.778974976 | 0.761800658 | 0.857129076 | 0.837818301 | 1           |             |
|         | 0.769667507                                                                                                                                      | 0.522529901 | 0.711541538 | 0.788248831 | 0.376282779 | 1           |             |
|         | 0.745841137                                                                                                                                      | 0.581033074 | 0.82624292  | 0.575396384 | 0.780570423 | 1.020101927 |             |
| YCL025C | YCL025C::AGP1::broad substrate range permease which transports asparagine and glutamine with intermediate specificity                            |             |             |             |             | 1           | 0.781803074 |
|         | 0.765830044                                                                                                                                      | 0.846990164 | 0.585603326 | 1           | 1.120203826 | 1.128147079 |             |
|         | 0.636297764                                                                                                                                      | 0.750655134 | 1           | 1.270623157 | 0.833620582 | 0.619359601 |             |
|         | 0.693590445                                                                                                                                      | 1           | 0.643993621 | 0.768926695 | 0.485458391 | 1           |             |
|         | 1.066224061                                                                                                                                      | 0.825920789 | 0.538536694 | 0.573022382 | 1           | 0.988599994 |             |
|         | 0.986339812                                                                                                                                      | 1.234684434 | 1.359872853 | 1.046269652 | 1           | 0.7061931   |             |
|         | 0.415577455                                                                                                                                      | 0.679108954 | 0.670120076 | 0.590531731 | 1           | 1.112402367 |             |
|         | 0.623549325                                                                                                                                      | 1.136571244 | 0.695666219 | 1.531086874 | 1.027106933 |             |             |
| YCL039W | YCL039W::YCL039W::molecular_function unknown                                                                                                     |             |             |             |             | 1           | 1.256904717 |
|         | 1.273297576                                                                                                                                      | 1.164614987 | 1.067906611 | 1           | 1.306586753 | 1.343486905 |             |
|         | 1.081006494                                                                                                                                      | 0.925702025 | 1           | 1.563806795 | 1.753350197 | 1.330810141 |             |
|         | 1.114912199                                                                                                                                      | 1           | 1.272396033 | 1.060373782 | 1.787136593 | 1.035895405 | 1           |
|         | 1.238495844                                                                                                                                      | 2.278657061 | 1.329368117 | 1.58675674  | 1           | 1.158394793 |             |
|         | 1.272704121                                                                                                                                      | 1.281336773 | 1.062554552 | 1.052676756 | 1           | 0.975945629 |             |
|         | 1.078636367                                                                                                                                      |             | 1.020636152 | 0.916683065 | 1           | 1.106038564 | 1.091431776 |
|         | 1.187799701                                                                                                                                      | 0.968657433 | 1.081871098 | 0.95705708  |             |             |             |
| YPL204W | "YPL204W::HRR25::Similar to YCK1 and YCK2, two other casein kinase I isoforms; found primarily in nucleus; may be involved in DNA-damage repair" |             |             |             |             |             | 1           |
|         | 0.842168178                                                                                                                                      | 0.923166562 | 1.159157779 | 0.983399583 | 1           | 1.053417323 |             |
|         | 1.073388052                                                                                                                                      | 0.818466655 | 0.936794994 | 1           | 0.959708222 | 1.106817899 |             |
|         | 0.748033463                                                                                                                                      | 1.149389649 | 1           | 1.220023207 | 1.290142892 | 1.008796732 |             |
|         | 1.031297205                                                                                                                                      | 1           | 0.893113571 | 0.712954261 |             | 1           | 0.936945829 |
|         | 0.992363273                                                                                                                                      | 0.992890348 | 0.865774883 | 0.947324405 | 1           | 0.885168312 |             |

0.738029531 0.782881617 0.909508749 0.867432451 1 0.737239236  
 0.678290036 1.03075618 0.93131415 0.9682778 1.013972585  
 YCL041C YCL041C::YCL041C::molecular\_function unknown 1 0.888000142  
 0.871022785 1.205360664 0.640071253 1 1.039765267 1.03813276  
 1.113994863 1.147546775 1 0.842040026 1.158285085 1.369494723  
 0.946655959 1 1.997095814 3.022842447 0.429334507 1  
 0.730215092 0.354107002 0.164191016 0.23916723 1 1.294991671  
 1.565535847 1.611583662 2.742751116 1.771908139 1 0.686272258  
 0.346614054 0.548171473 0.970054055 0.269739594 1 0.541387062  
 0.401275695 0.585159167 0.306427932 0.730211535 0.312597762  
 YPL206C YPL206C::YPL206C::molecular\_function unknown 1 1.070581991  
 1.096934122 0.886645081 1.105899346 1 1.017963559 0.868871784  
 0.980950388 1.053607725 1 0.986001685 1.07344953 1.388262531  
 0.946729151 1 1.581874537 1.375155004 1.462408462 1.754341344 1  
 1.305088284 1.332496159 1.680482225 1.131678398 1 1.083135777  
 1.270082475 1.020052468 0.953863321 1.012630702 1 0.980960818  
 1.021817362 1.293422096 1.011655432 0.954688963 1 1.172977417  
 1.025927682 0.865731827 1.031053901 1.212153169 1.545476347  
 YCL043c YCL043c::PDI1::Catalyzes the formation and isomerization of  
 disulfide bonds during the folding of secretory proteins. 1 0.864527787  
 0.726692574 0.747327948 0.354014595 1 1.055375455 1.044766426  
 0.542527092 1 1.017853185 1.027666705 0.738275903 0.618505064 1  
 0.821257317 1.150142748 0.671282668 1 0.849022273 0.641398944  
 0.471984422 1.000921819 1 0.888887763 0.983936154 1.473928289  
 1.144028132 0.782960422 1 0.838343345 0.786524929 0.981081613  
 0.845079787 0.451867822 1 0.850996272 0.82126242 0.99233482  
 0.489659978 0.803522488 0.794190973  
 YPL208W YPL208W::YPL208W::molecular\_function unknown 1 1.193553775  
 0.982300426 1.528716974 1.439536497 1 1.375386013 1.282564315  
 1.079124267 1.099271244 1 0.977677153 0.928482579 0.725456819  
 1.222424672 1 0.737906687 0.547018956 0.631249722 0.930424648 1  
 0.773746257 0.963067549 0.474956131 0.852369886 1 1.042694134  
 0.969877563 0.873327133 0.913356209 0.982942815 1 1.006403656  
 1.064558801 1.116058432 0.860041224 0.793109154 1 1.207691452  
 1.181501107 0.987068142 0.932450421 1.102950612 1.102410567  
 YCL045C YCL045C::YCL045C::molecular\_function unknown 1 0.843541371  
 0.638407027 0.802121503 0.690672512 1 0.797554475 0.829185703  
 0.626682452 0.613778986 1 0.924445961 0.722540152 0.639687736  
 0.920270645 1.5124135 0.25343356 1.292163079 0.884317266 1  
 0.684846618 0.56072929 0.580334005 0.575962522 1 0.79070722  
 0.949702424 1.139148098 1 1.574654533 1.46035643  
 1.176954474 1 0.659318784 0.656697918 0.702907882  
 0.989455116  
 YPL210C YPL210C::SRP72::part of the signal recognition particle (SRP)  
 ribonucleoprotein (RNP) complex that functions in protein targeting to the  
 endoplasmic reticulum (ER) membrane 1 0.734531247 0.829472658 0.961795544  
 1.105177217 1 0.985474244 0.741660666 0.991539952 1  
 0.770821008 0.733284814 0.579095237 0.940969972 1 0.691149466  
 0.528148817 0.507373538 0.698507278 1 0.826352751 0.836771788  
 0.799885625 1.031066606 1 0.842531967 0.913900333 0.825045207  
 0.819380352 1.045551167 1 0.889152012 0.714186663 0.815784247  
 0.735799567 0.694701126 1 0.989090801 1.031323254 1.239687236  
 1.09145296 1.016549691 1.160201842  
 YPL212C YPL212C::PUS1::Involved in tRNA biogenesis 1 1.676810035  
 1.621194454 1.497088775 1 1.727273205 1  
 1.418560489 1.487082499 1.438851384 1.500737929  
 1 1 0.887247031 0.870492089 0.924008047

1.071033447 1.061547904 1 1.075401495 0.852932835 0.841292421  
1.03048522 0.744482506 1 0.879770733 0.795729452 0.773673822  
1.03777864 0.627214685 15.2192212  
YPL214C YPL214C::THI6::thiamin biosynthetic bifunctional enzyme 1  
0.784280853 0.830613267 0.944938158 1.06796368 1 0.963438951  
0.933162721 1.012634654 1 0.920446 0.928979534 0.880615856  
1.020558491 1 1.446671598 1.463245483 1.660627688 1.508387947 1  
1.449359592 1.866865759 1.287152663 1.389324307 1 1.213851844  
1.130976843 1.189577775 1.177705051 1.063995274 1 1.172856175  
1.266078245 1.020403343 0.844435075 1.166495654 1 1.010036337  
0.978139849 0.971873226 1.240351558 1.19069313 1.359844049  
YPL228W "YPL228W::CET1::Interacts with Cegl1, the mRNA capping enzyme alpha  
subunit; removes gamma-phosphate from triphosphate-terminated RNA" 1  
1.223807269 1.078886956 1.185912693 1.617187161 1 1.012966019  
1.357036482 1.071881885 1.113025859 1 0.998084443 1.011369151  
0.927703562 1.234161952  
1 0.852773427 1.113601328 0.784644249 0.708539559 0.996357653 1  
0.992800578 1.134610669 0.886701721 0.832258845 0.890200151 1  
1.392288015 1.170746924 1.099406255 1.142966045 1.454793851 0.889634012  
YCL047C YCL047C::YCL047C::molecular\_function unknown 1 0.992591911  
1.044029178 0.997717741 1 0.863455737 0.977228349 1.029139246  
1 0.993193031 0.994574092 2.00645489 1.146361942 0.563083198  
0.466943188 1 1.544219965 1.705221309 1.994163345 1.802548626 1  
1.044489755 1.34430383 0.83481237 1.010008585 1  
1 0.691924946 0.705956733 0.519980162 0.654109198  
0.682442149 1.631287543  
YCL049C YCL049C::YCL049C::molecular\_function unknown 0.837275169  
0.845002938 0.934770084 0.958410624 0.826927258 0.921542483  
1.05441114 0.906635233 1.058774766 0.802804815 1.130732267 1  
1.516018916 2.75726474 2.07470594 1 1.626696943 2.184820171  
2.699949536 1.537235151 1.056807685 0.971943451 0.644588  
0.847391082 0.764540752 1 0.932764782 1.138363001 0.71775754  
1.101974615 1 0.801373304 1.030827679 0.672658527 1.07699535  
0.77444358 0.999962573  
YCL063W YCL063W::YCL063W::molecular\_function unknown 1 1.072175484  
0.749519968 0.887469763 1 0.979385855 0.997844887 0.67868296  
1 1.108095136 0.766677158 0.769098795 0.76543465 1  
0.488123167 1 0.878424911 0.840313444  
0.971322153 1.168676557 0.975516761 1 0.698500207 0.50371078  
0.730329227 0.958259541 0.804429199 1 0.722035688 0.474734243  
0.761191065 0.2611183 0.940760452 0.814330326  
YPL230W YPL230W::YPL230W::molecular\_function unknown 1 0.915258413  
1.609607242 1 1.217709656 1.77778776 0.937516639 1  
1.353918596 2.337577915 4.196849202 1.267635208 1 1.874005874  
1.583896597 3.167645413 1.966219518 0.338772607 0.86773797  
0.845656333 0.173941436 1 0.99979295 1.358782457 0.865863842  
0.990856298 1 0.811980362 2.19549647 2.221211943 2.291689525 1  
1.060816613 1.037563904 1.496248613 0.511240081 0.715384783  
YCL065W YCL065W::YCL065W::molecular\_function unknown 1 1.644243969  
1.368844135 0.856118096 1.493670706 1 1.021218884 0.952404788  
1.363606816 1 1.176076187 1.256663998 1.300676597 1.267877457  
0.575182461 0.61219052 1 1.839538072 2.667724085  
1 0.927058746 0.78548612 0.438243262 0.704896044 0.79665078 1  
0.797437812 0.743586534 0.835039887 0.949927409 1.010977195 1  
0.768757258 0.717001244 0.914883188 0.580401131 1.747745549  
YPL232W YPL232W::SSO1::SSO1 and SSO2 encode syntaxin homologs (post-Golgi t-  
SNAREs); act in late stages of secretion 1 0.760760302 0.988505724



|             |                                                                                                                                                                                                                                 |             |             |             |             |             |   |
|-------------|---------------------------------------------------------------------------------------------------------------------------------------------------------------------------------------------------------------------------------|-------------|-------------|-------------|-------------|-------------|---|
| 0.946377023 | 1.083598997                                                                                                                                                                                                                     | 1           |             | 0.888331456 | 1.099008616 | 1.17686044  | 1 |
| 0.67121191  | 0.893241716                                                                                                                                                                                                                     | 1.060483029 | 1.06796978  | 1           |             | 0.884682638 |   |
| 1.065463441 | 1.026279862                                                                                                                                                                                                                     | 1.521333434 | 1           | 1.138755076 | 1.320594386 |             |   |
| 1.541126196 | 0.845923329                                                                                                                                                                                                                     | 1           | 0.957329487 | 1.148137094 | 0.909593908 |             |   |
| 0.937515178 | 0.960041457                                                                                                                                                                                                                     | 1           | 1.092285937 | 1.188402281 | 0.911203982 |             |   |
| 1.071636016 | 1.594923318                                                                                                                                                                                                                     | 1           | 1.146523947 | 0.972340214 | 1.099917459 |             |   |
| 1.142703825 | 1.18201988                                                                                                                                                                                                                      | 1.007843244 |             |             |             |             |   |
| YCL067c     | "YCL067c::HMLALPHA2::Homeobox-domain containing protein which, in haploid cells, acts with MCM1 to repress a-specific genes. In diploid cells alpha2 acts together with a1 to repress transcription of haploid-specific genes." |             |             |             |             |             |   |
| 1           | 0.716051879                                                                                                                                                                                                                     | 1.1754149   | 0.923262885 | 1.406995183 | 1           |             |   |
| 0.744406718 | 0.82283187                                                                                                                                                                                                                      | 1.357265876 | 1.057452025 | 1           | 0.941979259 |             |   |
| 1.394568428 | 1.337105995                                                                                                                                                                                                                     | 1.045217823 | 1           | 1.274587317 | 1.535740514 |             |   |
| 1.499347064 | 1                                                                                                                                                                                                                               | 1.609908297 | 1.841714186 | 2.453297219 | 1.059836614 | 1           |   |
| 0.869285276 | 1.319861933                                                                                                                                                                                                                     | 0.73062033  | 0.554867778 | 1.028532829 | 1           |             |   |
| 1.291618812 | 2.001007464                                                                                                                                                                                                                     | 1.903969902 | 2.350037622 | 3.269331161 | 1           |             |   |
| 1.108348143 | 1.490816923                                                                                                                                                                                                                     | 1.206251344 | 1.303823315 | 2.280584346 | 1.323067897 |             |   |
| YCL069W     | YCL069W::YCL069W::not yet annotated                                                                                                                                                                                             |             |             |             |             |             |   |
| 1.037707084 | 0.986743317                                                                                                                                                                                                                     | 1.303780356 | 1.204333276 |             |             |             |   |
| 0.922308463 | 0.929733252                                                                                                                                                                                                                     | 1.038855172 | 1.157165038 | 1           | 0.926901952 |             |   |
| 0.894843688 | 1.438018283                                                                                                                                                                                                                     | 1.348558876 | 1           | 1.212430932 | 2.041012993 |             |   |
| 0.728444537 | 0.732431076                                                                                                                                                                                                                     | 1           | 1.101055306 | 0.887036379 | 0.888090111 |             |   |
| 1.032402635 | 1                                                                                                                                                                                                                               | 0.68171194  | 0.975455917 | 0.7321864   | 0.906136323 |             |   |
| 0.966032588 | 1                                                                                                                                                                                                                               | 0.785964886 | 1.285629441 | 1.030845626 | 0.869323921 |             |   |
| 1.34178893  | 1.112918128                                                                                                                                                                                                                     |             |             |             |             |             |   |
| YPL234C     | YPL234C::TFP3::vacuolar ATPase V0 domain subunit c' (17 kDa)                                                                                                                                                                    |             |             |             |             |             |   |
| 2.134068114 | 1.80354316                                                                                                                                                                                                                      | 1.306235899 | 2.586820868 | 1           | 1.460696181 |             | 1 |
| 1.023462751 | 2.026963023                                                                                                                                                                                                                     | 1.966550145 | 1           | 1.387479547 | 1.461808409 |             |   |
| 1.649540931 | 1.613392335                                                                                                                                                                                                                     | 1           | 0.951164628 | 0.592587988 | 0.601870435 |             |   |
| 1.186451358 | 1                                                                                                                                                                                                                               | 1.934680755 | 1.640578949 | 1.389050465 | 1.166118712 | 1           |   |
| 1.188780915 | 1.305532993                                                                                                                                                                                                                     | 1.195153591 | 1.35681282  | 1.007114778 | 1           |             |   |
| 1.077451509 | 1.422964177                                                                                                                                                                                                                     | 1.040985222 | 0.685818815 | 1.141862241 | 1           |             |   |
| 1.295650468 | 1.381032291                                                                                                                                                                                                                     | 0.875165093 | 1.573267228 | 1.11857368  | 1.288042866 |             |   |
| YCL074W     | YCL074W                                                                                                                                                                                                                         |             |             |             |             |             |   |
| 0.89109581  |                                                                                                                                                                                                                                 | 1.182030799 |             | 1.248106005 | 1.267894155 |             |   |
| 1.116047446 | 1                                                                                                                                                                                                                               | 0.91414862  |             | 0.921628155 | 1           | 1.288838774 |   |
|             | 1.183825766                                                                                                                                                                                                                     |             |             |             |             |             |   |
| 0.949280245 |                                                                                                                                                                                                                                 | 1.186683729 |             | 0.782894176 | 1.389530769 |             |   |
| 0.93112307  | 1.206986658                                                                                                                                                                                                                     |             | 0.767922225 |             |             |             |   |
| YPL236C     | YPL236C::YPL236C::molecular_function unknown                                                                                                                                                                                    |             |             |             |             |             |   |
| 1.056518664 | 0.943036859                                                                                                                                                                                                                     | 1.07442496  | 1           | 1.038359601 | 1.200669278 |             |   |
| 1.14795602  | 1.021915172                                                                                                                                                                                                                     | 1           | 0.944191815 | 1.09944912  | 1.054678025 |             |   |
| 0.992951959 | 1                                                                                                                                                                                                                               | 1.744993555 |             | 1.421829027 | 1.685968119 | 1           |   |
| 1.915329844 |                                                                                                                                                                                                                                 | 0.991400376 | 1           | 0.992096575 | 1.121153105 | 0.953002112 |   |
| 0.905691101 | 1.020536867                                                                                                                                                                                                                     | 1           | 1.159009603 | 0.87073754  |             | 0.860390854 |   |
| 1.191981893 | 1                                                                                                                                                                                                                               | 1.430421719 | 0.953931287 | 1.123350385 | 1.014492376 |             |   |
| 1.3624915   | 0.978071994                                                                                                                                                                                                                     |             |             |             |             |             |   |
| YCL076W     | YCL076W::YCL076W::molecular_function unknown                                                                                                                                                                                    |             |             |             |             |             |   |
| 0.97837775  | 0.816460138                                                                                                                                                                                                                     |             | 0.842666664 | 1.077512749 |             | 1.048216015 |   |
|             | 1.196277971                                                                                                                                                                                                                     | 1.847502811 | 1.29813939  | 1           |             | 2.620909293 |   |
| 1.987562069 |                                                                                                                                                                                                                                 | 0.37136928  | 1.000805984 | 0.327116353 |             |             |   |
| 0.968930563 |                                                                                                                                                                                                                                 |             | 0.859271058 |             |             | 0.903033272 |   |
| 0.82764329  | 0.712010268                                                                                                                                                                                                                     | 1           |             | 1.55043651  |             | 1.408780951 |   |
| 0.933415171 |                                                                                                                                                                                                                                 |             |             |             |             |             |   |
| YPL238C     | YPL238C::YPL238C::molecular_function unknown                                                                                                                                                                                    |             |             |             |             |             |   |
| 0.983491885 | 0.945752071                                                                                                                                                                                                                     | 1.485816503 | 1           |             | 0.97570406  | 1.023814079 |   |
| 1.241433379 | 1                                                                                                                                                                                                                               | 0.70882132  | 0.708604947 | 0.90064336  | 0.892862373 | 1           |   |

0.982330315 0.429503945 0.377495177 1 1.351082716 0.333394812  
 0.365644753 0.753037454 1 0.628868535 0.849305434 0.635514431  
 0.686190642 0.844600008 1 1.112874173 0.883280084 0.734523934  
 0.961312408 0.599429229 1 1.016888298 0.726701955 0.890905464  
 0.826035161 1.007923997 0.920280823  
 YCR002c YCR002c::CDC10::cell division cycle blocked at 36 degree C  
 1.056444222 1.113763987 0.913525251 1.051412707 0.889885097  
 1.000626017 1.053359122 1.008567177 1.00067454 1.233298031  
 1.1942744 1.094509732 1 1.700978239 1.320233263 1.047533685  
 1.359818581 1 1.764262853 1.038117752 1.228119007 1.006818647 1  
 0.956183695 0.903280444 1 0.983902941 1.488674874  
 0.916684803 0.851135508 1.39500599 1 1.683292133  
 1.303432768 0.731630757 1.449157695  
 YPL252C YPL252C::YAH1::Yeast Adrenodoxin Homologue 1; This protein is  
 targeted to the mitochondrial matrix as shown by using a specific polyclonal  
 antibody 1 1.179913009 1.168129893 0.514316508 1 0.926313132  
 1.26980033 0.658210813 1 1.294892129 0.773568078 0.918243333  
 0.459314238 1 0.746222608 0.918562453 0.667734756 1.518618084 1  
 0.562166529 0.761401134 0.525068038 0.653925212 1 0.91925389  
 0.68326339 0.61668279 0.897083526 0.798872687 1 0.668833987  
 0.684050196 0.350158627 0.663543074 1.29412272 1 0.785068676  
 0.741761017 0.822976333 1.016899385 0.978128475 1.043743836  
 YCR004C YCR004C::YCP4::Protein with similarity to S. pombe brefeldin A  
 resistance protein obr1 and E. coli WrbA protein which stimulates binding of Trp  
 repressor to DNA 1 1.142099369 1.061773233 1.091951676 1.095286278 1  
 0.926209889 1.034576194 1.289189016 1.292937523 1 1.106773759  
 1.369243797 2.166446192 1.334029769 1 1.740696149 1.87386795  
 2.657973922 1.87838973 1 1.682757718 1.386818396 2.035868417  
 1.572753675 1 1.074480613 0.98029291 1.306717633 0.916150301  
 0.746491211 1 0.97709795 1.223356108 1.241192588 1.085874674  
 1.090301674 1 1.150497062 1.411253377 1.293947345 1.208623529  
 1.926979636 1.217117347  
 YPL254W YPL254W::HFI1::Transcription factor involved in global regulation of  
 gene expression 1 0.626425416 0.598534295 0.825423923 0.654471564 1  
 0.673605811 0.709110111 0.735299072 1 0.495333319 0.587675908  
 0.372010978 0.737398067 1 0.42791608 1.049386818 0.961932505  
 0.658315976 1 0.712585416 0.502409594 0.52203583 0.631036141 1  
 0.804098262 0.995564423 0.81757402 1.089842183 1.049688672 1  
 0.880914389 0.65381284 0.745000195 0.854320855 0.672335533 1  
 0.733201586 0.678302175 0.787335797 0.652719288 0.968227844 0.939544512  
 YPL256C YPL256C::CLN2::role in cell cycle START 1 0.641818832  
 0.696139665 0.800353384 0.672382644 1 0.773633812 0.811791189  
 0.775738051 0.668473289 1 0.420481959 0.456123951 0.37886395  
 0.973156664 1 0.267640395 0.230301238 0.255043994 0.766907722  
 0.644948541 0.450693635 2.02533068 1 0.56111779 0.586527183  
 0.713637649 0.767378892 0.904912826 1 0.523705144 0.511026151  
 0.370874299 0.397966611 0.775384771 1 0.536649102 0.687986053  
 1.005671247 0.917390365 1.061425638 0.72501668  
 YPL258C YPL258C::THI21::THI for thiamine metabolism. Transcribed in the  
 presence of low level of thiamine (10-8M) and turned off in the presence of high  
 level (10-6M) of thiamine. Under the positive control of THI2 and THI3. 1  
 0.956111099 1.056435634 1.012964795 0.998780251 1 1.004195675  
 1.036564032 1.001328438 1.01947318 1 0.919105839 0.9582202  
 1.16240867 0.897995754 1 0.864973156 0.921884586 1.272279297  
 1.005809847 1 1.405697084 1.824886134 1.689791145 1.4833113 1  
 0.890207739 0.814542926 0.911638123 0.924334191 0.934357757 1

|         |                                                                   |             |             |             |             |               |
|---------|-------------------------------------------------------------------|-------------|-------------|-------------|-------------|---------------|
|         | 1.099315247                                                       | 0.915524517 | 0.831268632 | 0.863683668 | 0.831092485 | 1             |
|         | 1.032523661                                                       | 0.856337953 | 0.889010514 | 0.840442723 | 1.133761776 | 0.980698884   |
| YPL260W | YPL260W::YPL260W::molecular_function                              | unknown     |             |             |             | 1 0.658194912 |
|         | 0.830133846                                                       | 0.947616134 | 0.926976047 | 1           | 0.892358333 | 0.927631329   |
|         | 0.748278552                                                       | 0.722543833 | 1           | 0.863746303 | 0.959486325 | 0.740823922   |
|         | 0.880861479                                                       | 1           | 1.7020869   | 1.311221407 | 1.190623173 | 1.029413521 1 |
|         | 1.724395894                                                       | 1.03367668  | 1.197487079 | 1.048678095 | 1           | 1.074204198   |
|         | 1.263683382                                                       | 1.028572114 | 0.88147617  | 0.989969906 | 1           | 1.074287911   |
|         | 1.100003623                                                       | 1.027689432 | 0.788158006 | 0.88391514  | 1           | 1.619850279   |
|         | 1.38899774                                                        | 1.068417589 | 0.957694141 | 1.740073972 | 0.999087012 |               |
| YKR015C | YKR015C::YKR015C::molecular_function                              | unknown     |             |             |             | 1 1.006824299 |
|         | 0.792284693                                                       | 0.819214481 | 0.680394006 | 1           | 0.792516976 | 0.856800808   |
|         | 0.721367807                                                       | 0.745396919 | 1           | 1.249747055 | 0.85752262  | 0.679384575   |
|         | 0.730227192                                                       | 1           |             | 1.058992276 | 1           | 1.947746239   |
|         | 4.997652146                                                       | 2.543144804 | 1.465195721 | 1           | 1.228014176 | 1.111968742   |
|         | 1.260398873                                                       | 1.446024157 | 1.23504437  | 1           | 0.972528909 | 0.88936202    |
|         | 0.885602976                                                       | 0.811525176 | 0.755592622 | 1           | 0.941497883 | 0.779947947   |
|         | 0.70650525                                                        | 0.57177866  | 0.684159507 |             |             |               |
| YKR017C | YKR017C::YKR017C::molecular_function                              | unknown     |             |             |             | 0.944397153   |
|         | 0.936108426                                                       | 1.043230249 | 1.199237048 |             | 0.984321892 | 1.129136693   |
|         | 0.907611303                                                       | 0.945376852 |             | 0.833091694 | 0.927617782 | 0.885773047   |
|         | 0.943745383                                                       |             |             |             |             |               |
|         | 0.692745419                                                       | 0.835724101 | 1.102265626 | 1.039362986 | 0.910942165 | 1             |
|         | 0.890415281                                                       | 1.08210013  | 0.973180158 | 0.717730576 | 0.750502913 | 1             |
|         | 0.88275721                                                        | 1.176684969 | 0.870646752 | 0.953963707 | 0.954731487 | 0.446568232   |
| YKR019C | YKR019C::IRS4::Increased rDNA silencing                           |             |             |             |             | 1 0.714749334 |
|         | 0.846482831                                                       | 0.84446097  | 0.821963501 | 1           | 0.819434909 | 0.788338722   |
|         | 0.999539463                                                       | 1.008628279 | 1           | 0.811875108 | 0.758250748 | 0.887520296   |
|         | 1.114888962                                                       | 1           | 0.763672341 |             | 0.612855516 | 0.871060877   |
|         | 0.339936759                                                       | 0.789462581 | 0.140538868 | 0.254389353 | 1           | 1.149835002   |
|         | 1.149139733                                                       | 1.258902718 | 1.268324875 | 1.154257707 | 1           | 0.954341321   |
|         | 0.841423574                                                       | 1.039588614 | 0.87357161  | 1           | 1.003349089 | 1.115669371   |
|         | 1.192129201                                                       | 1.120751201 | 1.054644297 | 0.913275817 |             |               |
| YKR021W | YKR021W::YKR021W::molecular_function                              | unknown     |             |             |             | 1 0.872714613 |
|         | 0.823759964                                                       | 1.028107644 | 0.857364633 | 1           | 0.951010251 | 1.004602789   |
|         | 0.850356182                                                       | 0.844515506 | 1           | 0.939983823 | 0.94173541  | 1.270753613   |
|         | 0.986654822                                                       | 1           | 1.051082882 |             | 0.979418271 | 0.774299434 1 |
|         | 0.802782995                                                       | 0.962723122 | 0.54977039  | 0.62894171  | 1           | 0.945955506   |
|         | 1.014444524                                                       | 0.795254976 | 0.916373756 | 1.029916386 | 1           | 1.100648165   |
|         | 0.835177452                                                       | 1.173448214 | 1.036377652 | 0.969578685 | 1           | 0.745520765   |
|         | 0.87335761                                                        | 0.940782631 | 0.795566659 | 0.840762854 | 1.068261305 |               |
| YKR023W | YKR023W::YKR023W::molecular_function                              | unknown     |             |             |             | 1 0.559682133 |
|         | 0.770615278                                                       | 0.888005803 | 0.925245191 | 1           | 0.80071626  | 0.962496231   |
|         | 1                                                                 | 0.791010952 | 0.97155021  | 1.155550302 | 0.759018809 | 1 0.893089786 |
|         | 0.634455147                                                       | 0.867867375 | 0.630012245 | 1           | 1.721492858 | 2.363363722   |
|         | 2.1964668                                                         | 2.054567672 | 1           | 0.776691257 | 0.981987102 | 0.683106299   |
|         | 0.547285719                                                       | 1.104842748 | 1           | 1.169095982 | 1.251000683 | 1.50690365    |
|         | 1.705454743                                                       | 1.659717159 | 1           | 1.096592545 | 1.286899555 | 1.197310165   |
|         | 0.748324537                                                       | 1.341270025 | 1.023604482 |             |             |               |
| YKR037C | YKR037C::SPC34::Spindle Pole Component of molecular weight 34 kDa |             |             |             |             | 1             |
|         | 0.82435508                                                        | 0.831866748 | 0.949621117 | 1.084285757 | 1           | 0.819347031   |
|         | 0.884037878                                                       | 1.167719046 | 1.164935397 | 1           | 0.787248573 | 0.892835692   |
|         | 1.745828385                                                       | 0.867850878 | 1           | 0.973027854 | 0.259959262 | 0.461576373   |
|         | 0.643657666                                                       | 1           |             | 1.614989517 | 1.651848342 | 1 1.076113024 |
|         | 1.081666061                                                       | 0.8301024   | 1.05955014  | 1.138761743 | 1           | 0.943368602   |
|         | 1.006625938                                                       | 1.058267389 | 1.004558929 | 0.954832144 | 1           | 0.97550224    |
|         | 0.922117338                                                       | 0.91680823  | 0.939308871 | 0.911206756 | 0.725892293 |               |

YKR039W YKR039W::GAP1::general amino acid permease 1 0.632342029  
0.570861781 0.956146097 0.72567596 1 1.171174784 1.444854667  
0.806349555 0.843347689 1 0.778155172 0.66882427 0.619273888  
0.81389631 1.617584441 3.092153922 1.692992996 1  
1.421695507 1.248597544 1 0.750077895 0.930949463  
1.392722981 0.838180732 1 0.715145928 0.711334868 1.250136575  
1.272865438 0.761858839 1 0.928535136 0.703012183 1.626659756  
2.535917159 1.355465933  
YKR041W YKR041W::YKR041W::molecular\_function unknown 1  
1 1.002841859 1.032358849 0.850193673 1.029856913 1  
0.92787073 1.187134364 0.993603162 1 0.901141818  
0.88763498 1 1.073737782 1 1.089941995  
0.914133817 1.041998195 1.071827117 1.140219174 1 1.034349884  
1.088264341 0.940716297 1.152332928 1.170371858 1 0.772193108  
0.747176371 0.687987293 0.619582995 1.338829134  
YJR039W YJR039W::YJR039W::molecular\_function unknown 1 1.153412461  
1.170594524 1.398616289 0.979407994 1 1.221907788 1.704401417  
1.079666285 0.953838271 1 1.468326447 1.549535865 0.984294237  
1.062211667 1 1.672195635 1.914203262 0.969479414 1  
1.293272752 0.79774144 0.851370936 0.793105936  
0.997672138 1.000888116 1 1.103677566 0.924576252 1.171097886  
0.748992538 1 0.797718659 0.673988132 0.747519135 0.757538443  
0.837567777 1.011345695  
YJR053W YJR053W::BFA1::Byr four alike 1 1.138740451 1.579664245  
1.139108794 1 1.445261299 1.500824097 1.020969129 1  
1.040958981 0.994152268 1.656506917 1 0.486248414  
0.58904601 0.439424721 1 0.749882263 0.827695103 0.650749001 1  
1.034059988 1.422090821 1.638433298 1 0.996300166  
1.181313647 0.674916101 1 0.80128749 0.792353295  
1.084507985 0.962273549 1.048495441 0.699623598  
YKR043C YKR043C::YKR043C::molecular\_function unknown 1 1.455543006  
1.091993922 0.82474758 1.081209811 1 0.819212011 0.856619304  
0.910851905 1.010174079 1 1.019704878 0.807221072 0.712535015  
1.506829165 0.641239993 0.947581025 1.72762379  
1.22737423 1 0.901746529 0.731077725 0.794918753 1.071050498  
0.886987285 1 0.989440107 0.92382565 0.993169089 0.855089287  
0.748786501 1 0.976624804 0.800987746 0.801233698 0.888683862  
0.632181457 0.814330326  
YJR055W YJR055W::HIT1::Protein required for growth at high temperature 1  
1.620687615 1.674640149 2.047506717 1 1.286084752 1.559889013  
2.220445839 2.184717397 1 0.857095412 0.964787648 1.125649613  
1.89252917 0.343434193 0.673896523 1 1.080385156  
0.864767989 1 0.881373228 0.908719362 1.045357957 1  
1.097547062 0.895065466 2.043858057 1.086279822  
0.958690643 0.774719383 1.398131438 2.548941476  
YKR045C YKR045C::YKR045C::molecular\_function unknown 1 0.768803994  
0.677708524 0.605221876 1 0.783965905 0.736620802  
0.662843819 1 0.768584469 0.815343853 0.741351901 0.825593839 1  
0.788397632 0.792549957 0.892239474 0.848458065 1 0.887615653  
1.389924808 1.119739527 1.24158173 1 0.809140643 0.72495357  
1.030021365 0.731557436 1.004246423 0.883565986 1.057595615  
0.710037578 0.810092769 0.703078203 1 0.81827267 1.225897364  
0.820809278 0.841284234 0.693333344 1.230251695  
YJR057W "YJR057W::CDC8::essential for mitotic DNA synthesis. Required for  
premeiotic DNA synthesis, synaptonemal complexes, recombination, meiosis I,  
meiosis II, and spores" 1 0.697025345 0.959713561 0.617735182 1.031451713 1  
0.647525701 0.643806535 0.932799796 0.996473962 1 0.692169398

|                          |                                                                      |             |             |             |                         |
|--------------------------|----------------------------------------------------------------------|-------------|-------------|-------------|-------------------------|
| 0.676794713              | 0.863910507                                                          | 0.741027631 | 1           | 0.860725889 | 0.590160405             |
| 0.506807492              | 0.990265299                                                          | 1           | 1.005617244 | 1.11912503  | 0.670967266             |
| 1.041313509              | 1                                                                    | 0.840647582 | 1.181366214 | 0.870976991 | 0.763390827             |
| 1.052200225              | 1                                                                    | 1.152430212 | 1.726800257 | 1.383030053 | 1.40092986              |
| 1.712920991              | 1                                                                    | 1.225296622 | 1.432688761 | 0.981352804 | 1.558848006             |
| 1.151983505              | 1.15144561                                                           |             |             |             |                         |
| YPL262W                  | YPL262W::FUM1::Fumarase converts l-malate to fumarate as part of the |             |             |             |                         |
| TCA cycle                | 1                                                                    | 0.942567723 | 0.841208827 | 0.962382733 | 1 0.98691091            |
| 1.201819798              | 0.772844528                                                          | 0.877934719 | 1           | 0.769924414 | 0.834650936             |
| 0.84131797               | 0.814736363                                                          | 1           | 1.409261675 | 1.29192635  | 1.7771283               |
| 1.65055481               | 1                                                                    | 0.678514318 | 0.752001209 | 0.640266212 | 0.804206234 1           |
| 1.121837871              | 1.04205575                                                           | 1.353173621 | 1.205989576 | 0.867167335 | 1                       |
| 0.943242066              | 0.740964915                                                          | 0.905430827 | 0.98055086  | 0.720325357 | 1                       |
| 0.934621503              | 1.098821888                                                          | 1.061720517 | 0.951917032 | 1.018264026 | 0.909773366             |
| YJR059W                  | YJR059W::PTK2::Putative serine/threonine protein kinase that         |             |             |             |                         |
| enhances spermine uptake | 1                                                                    | 1.00406172  | 1.210008886 | 0.815211074 |                         |
| 0.843973112              | 1                                                                    | 1.042727564 | 1.102525472 | 0.957996464 | 0.684998314 1           |
| 1.526784857              | 1.421700756                                                          | 1.220418164 | 0.823693953 | 1           | 1.229833082             |
| 1.558785941              | 1.503544385                                                          | 0.721793975 | 1           | 1.139975493 | 1.033371999             |
| 0.854122892              | 0.682015536                                                          | 1           | 1.135866202 | 1.018802948 | 1.171545674             |
| 1.192684794              | 1.012815413                                                          | 1           | 0.946516635 | 0.838527248 | 0.780407553             |
| 0.829507775              | 0.695180803                                                          | 1           | 0.819664867 | 0.848454939 | 0.999839838             |
| 0.892537936              | 0.922602255                                                          | 0.767046613 |             |             |                         |
| YJR061W                  | YJR061W::YJR061W::molecular_function unknown 1 1.810902535           |             |             |             |                         |
| 1.453632825              | 1.486086273                                                          | 1.371120295 | 1           | 1.333048677 | 1.738443908             |
| 1.458843635              | 1.309035574                                                          | 1           | 1.309543478 | 1.200258423 | 1.47426016              |
| 1.237732126              | 1                                                                    | 0.8261398   | 0.91450518  | 0.846812367 | 1                       |
| 1.85300724               | 0.987323058                                                          | 1           | 1.212650246 | 0.755897374 | 1.242908261             |
| 1.063336178              | 1                                                                    | 0.905984232 | 1.074691567 | 1.017463241 | 1.102788035             |
| 1.271144689              | 1                                                                    | 0.821281052 | 0.90044805  | 0.694925605 | 1.058454672             |
| 0.916547465              | 1.043743836                                                          |             |             |             |                         |
| YPL276W                  | YPL276W::YPL276W::molecular_function unknown 1 1.900138905           |             |             |             |                         |
| 1.714533185              | 1.447497328                                                          | 1.829433834 | 1           | 2.100138793 | 1.399759437             |
| 1                        | 1.260957123                                                          | 1.141323075 | 1.512768603 | 1           |                         |
|                          |                                                                      |             | 1           | 1.125717206 | 1.144390339 1.006326192 |
| 1.121205409              | 0.919804443                                                          | 1           | 1.110706069 | 0.855031812 |                         |
| 1.036323667              | 0.856622497                                                          | 1.169312727 | 0.517244217 | 3.19360552  | 0.936917726             |
| YJR063W                  | YJR063W::RPA12::A12.2 subunit of RNA polymerase I 1                  |             |             |             |                         |
| 1.253590362              | 1.30456038                                                           | 0.987284879 | 1.951822079 | 1           | 1.078381739             |
| 0.899146317              | 1.649000688                                                          | 1           | 0.741758466 | 0.53367321  | 0.711433382             |
| 1.160532497              | 1                                                                    | 0.246013611 | 0.16397747  | 0.168378989 | 0.630254289 1           |
| 0.432589278              | 0.569753483                                                          | 0.927869023 | 1           | 0.830926645 | 0.700880983             |
| 0.482016365              | 0.740379634                                                          | 0.851116292 | 1           | 0.752690278 | 0.901644885             |
| 0.483082528              | 0.79108339                                                           | 1.620004479 | 1           | 0.610536668 | 0.90747816              |
| 0.706805375              | 1.889283071                                                          | 0.687858128 | 1.392242189 |             |                         |
| YPL278C                  | YPL278C::YPL278C::molecular_function unknown 0.932084295             |             |             |             |                         |
| 0.972550541              | 0.684305339                                                          |             | 0.727647541 | 0.78094963  | 0.973860319             |
| 1.23654798               |                                                                      | 0.881078266 | 1.082092115 | 1.013253582 | 1                       |
| 0.910186341              | 1.170953895                                                          | 1.246291295 | 2.021040151 | 1           | 1.683237503             |
| 3.970676672              | 1.937213545                                                          | 1.234370448 | 1           | 1.187373582 | 1.318964612             |
| 1.05843203               | 1.018945542                                                          | 1           | 1.20689304  | 1.445225665 | 1.286692622             |
| 1.498110144              | 1.125316431                                                          |             | 0.872659976 | 1.05416064  | 0.750705612             |
| 2.062970097              |                                                                      |             |             |             |                         |
| YJR077C                  | YJR077C::MIR1::Product of gene unknown 1 1.6651357                   |             |             |             |                         |
| 1.121790234              | 1.33828081                                                           | 0.807014574 | 1           | 1.430139284 | 1.659614766             |
| 1.299366945              | 1                                                                    | 1.490796728 | 0.88958993  | 1.062078781 | 0.941876722 1           |
| 0.984610366              | 0.909105998                                                          | 0.807301288 | 0.93390924  | 1           | 0.476826191             |

|         |                                                          |             |             |             |             |             |             |
|---------|----------------------------------------------------------|-------------|-------------|-------------|-------------|-------------|-------------|
|         | 0.319226616                                              | 0.228564534 | 0.65738605  | 1           | 0.840012437 | 0.444067287 |             |
|         | 0.728844278                                              | 1.235215347 | 0.618009627 | 1           | 0.587580102 | 0.262722156 |             |
|         | 0.315918372                                              | 0.447758863 | 0.316399705 | 1           | 0.620829566 | 0.295235725 |             |
|         | 0.33961151                                               | 0.467635457 | 0.418214203 | 0.873872775 |             |             |             |
| YPL280W | YPL280W::YPL280W::molecular_function unknown             |             |             |             |             |             | 1           |
|         | 0.47912548                                               | 0.717102066 | 1.471120738 | 2.318772185 | 1           | 1.177456979 |             |
|         | 3.246606196                                              | 1.983714357 |             |             |             |             |             |
|         |                                                          |             | 0.347700449 | 0.507877797 |             | 1.201134042 |             |
| YJR079W | YJR079W::YJR079W::molecular_function unknown             |             |             |             |             | 1           | 1.303946995 |
|         | 1.6256655                                                | 1.420596917 | 2.186406478 | 1           | 1.284114504 | 1.523949139 |             |
|         | 1.872307158                                              | 2.082356551 | 1           | 1.201446155 | 1.43024717  | 2.138053214 |             |
|         | 1.549651073                                              | 1           | 0.809382407 | 0.747821581 | 0.770156426 | 1.220415316 |             |
|         | 2.534170359                                              | 1.822370239 | 1.961200196 | 1           | 1.178719658 | 1.080398709 |             |
|         | 1.291202981                                              | 1.246487534 | 1.270296528 | 1           | 1.427016056 | 1.319707342 |             |
|         | 1.047542768                                              | 1.499057524 | 1.402486664 | 1           | 1.029899133 | 1.224922784 |             |
|         | 0.966419701                                              | 1.637344772 | 1.332531852 | 1.611148189 |             |             |             |
| YPL282C | YPL282C::YPL282C::molecular_function unknown             |             |             |             |             | 1           | 1.256912869 |
|         | 0.94333604                                               | 1.028464444 | 1.202335218 | 1           | 1.098171744 | 1.278916507 |             |
|         | 0.921428659                                              | 1.092218689 | 1           | 0.857660796 | 0.884029369 | 0.791529946 |             |
|         | 1.319993288                                              | 1           |             |             | 1           |             |             |
|         | 0.415130511                                              | 1           | 0.982458291 | 0.980014089 | 1.080217921 | 1.053725445 |             |
|         | 1.113770893                                              | 1           | 1.082820722 | 1.069336495 | 0.717071845 | 0.865971901 |             |
|         | 1.118568106                                              | 1           | 0.982555355 | 0.996621494 | 1.021552372 | 1.280420076 |             |
|         | 0.769221271                                              | 1.585755055 |             |             |             |             |             |
| YJR082C | YJR082C::EAF6::Esalp-Associated Factor-6                 |             |             |             |             | 1           | 1.239190895 |
|         | 1.674707992                                              | 1.351415981 | 1.75006171  | 1           | 1.196244171 | 1.196290269 |             |
|         | 1.653149452                                              | 1           | 1.21337121  | 1.38855744  | 1.54123884  | 1.463663293 |             |
|         | 0.694825625                                              | 1.35772244  | 1.545305138 | 1           | 1.846610515 | 2.976818694 |             |
|         | 1.859931161                                              | 1.585726867 | 1           | 0.869812237 | 0.948092374 | 0.654277963 |             |
|         | 0.660921099                                              | 1.068100974 | 1           | 0.951930333 | 1.53429846  | 1.011077618 |             |
|         | 1.321186948                                              | 1.74432123  | 1           | 1.060127849 | 1.164165949 | 1.105848895 |             |
|         | 1.802854447                                              | 1.224234921 | 1.711844958 |             |             |             |             |
| YPR001W | YPR001W::CIT3::Mitochondrial isoform of citrate synthase |             |             |             |             | 1           |             |
|         | 1.622715363                                              | 1.244721795 | 1.237461494 | 1           | 1.311696452 | 1.342118159 |             |
|         | 1.350074623                                              | 1.361045331 | 1           | 1.350816829 | 1.356253122 | 1.498388781 |             |
|         | 1.112991878                                              | 1           | 0.87347824  |             | 1.487575101 |             |             |
|         | 0.686586491                                              | 1           | 1.109715062 |             | 1.077569202 | 1.066491854 |             |
|         | 1.030249416                                              | 1           | 0.533283166 | 0.650154792 | 0.712278082 | 0.840373686 |             |
|         | 1.537993855                                              | 1           | 0.97318453  | 1.079611453 | 1.488830789 | 1.140921652 |             |
|         | 1.685807198                                              | 1.027106933 |             |             |             |             |             |
| YPR003C | YPR003C::YPR003C::molecular_function unknown             |             |             |             |             | 1           | 0.871517131 |
|         | 0.842303384                                              | 0.941657147 | 0.650697785 | 1           | 0.996511043 | 0.988699576 |             |
|         | 0.808542109                                              | 0.673735284 | 1           | 0.932641245 | 0.903480816 | 0.698220356 |             |
|         | 0.857692558                                              | 1           | 0.695993801 | 0.587034182 | 0.868180351 | 0.785657192 |             |
|         | 1.50769984                                               | 1.154858973 | 1.829312644 | 1.318114903 | 1           | 0.60109565  |             |
|         | 0.577249153                                              | 0.56733561  | 1.084168545 | 0.92732141  | 1           | 0.76128662  |             |
|         | 0.391517192                                              | 0.323798227 | 0.45907365  | 0.869828307 | 1           | 0.605875339 |             |
|         | 0.489982899                                              | 1.006096656 | 0.867278431 | 1.200994802 | 0.971942653 |             |             |
| YPR017C | YPR017C::DSS4::dominant suppressor of sec4               |             |             |             |             | 1           | 1.345639895 |
|         | 1.321248048                                              | 1.172342764 | 1           | 1.094261071 | 1.228710209 | 1.709933184 |             |
|         | 1.678868044                                              | 1           | 1.043029762 | 1.157464975 | 1.248639543 | 1.204525519 |             |
|         | 0.98375291                                               | 0.471215897 | 1           |             |             | 1           |             |
|         | 1.201658619                                              | 1.333538936 | 0.97884877  | 1.068259524 | 1.081414291 | 1           |             |
|         | 0.915358631                                              | 0.974735559 | 0.960634344 | 1.217112154 | 1.747242443 | 1           |             |
|         | 1.223806618                                              | 1.165585715 | 1.364250789 | 1.163195962 | 1.359844049 |             |             |

YPR019W YPR019W::CDC54::essential for initiation of DNA replication; homolog of *S. pombe* CDC21 1 0.756802392 0.728462438 0.90104371 0.633121657 1  
0.933702997 0.919647918 0.675824842 0.713862302 1 0.855514871  
0.762769762 0.505325075 0.69720178 1 0.712239761 0.601346651  
0.758987607 0.609241757 1 0.735493534 0.513228407 0.572387319  
0.750596418 1 0.808011281 0.851610355 0.837341871 1.117312259  
0.791586292 1 1.253405475 0.705250868 0.737512939 0.866223887  
0.535572572 1 0.806661831 0.58061892 0.902575277 0.603604515  
0.857837231 0.723265402

YPR021C YPR021C::YPR021C::molecular\_function unknown 1 1.053805571  
1.004710546 1.428969609 1.101302146 1 1.326246595 1.615833265  
1.217889317 0.932288434 1 1.108187545 1.014644032 0.790481307  
1.227367408 1 0.778175473 0.763426814 0.75067044 0.598190016 1  
0.74786675 1 0.799979953 0.805419114 0.731897331  
1.021617656 1.076448844 1 0.955878786 0.491975799 0.395518934  
0.587639938 0.517901433 1 1.264645778 0.703700108 0.926489951  
0.985131184 1.558604528 0.813454714

YKR047W YKR047W::YKR047W::molecular\_function unknown 1 1.580223301  
1.715206724 1.00976553 1.40621925 1 1.186934169 1.10841756  
1.708498666 1.584523237 1 1.311640938 1.485678942 2.491283102  
1.449266089 1 1.258454933 0.778829974 1.151231419 1.414803867 1  
1.531935296 2.351630108 2.013511888 1.038485639 1 0.969779802  
0.833263928 0.86872896 0.667100872 0.788115213 1 1.031860883  
1.589506696 1.098283093 1.200182885 1.917735746 1 0.62155771  
1.544538443 1.067211915 1.323549545 0.955248728 1.351963482

YLR176C "YLR176C::RFX1::DNA binding protein, homologous to a family of mammalian RFX1-4 proteins which have a novel highly conserved DNA binding domain" 1 0.883582835 0.970637098 0.959649252 0.721593743 1  
0.882164565 1.064594005 0.840805826 0.788360604 1 1.084785478  
1.12375482 0.826693028 0.772204014 1 1.048879125  
0.506412648 1 1.099888866 1.197821384 1.148337049  
1.009432858 1 1.251925337 1.447825715 1.194098038  
1.038844923 1 1.52371568 1.37391031 1.092487293 1.114906404  
0.883504567

YLR178C YLR178C::TFS1::(putative) lipid binding protein; supressor of a *cdc25* mutation 1 0.77185739 1.815663521 1.785041728 1.258057708 1  
1.176402783 2.237765295 2.644047102 2.451810563 1 1.06564277  
2.928477416 16.01087036 1 3.970697463 5.646517267 10.44622252  
8.062962623 1 3.575572764 5.821995366 13.21962036 6.018945395  
0.666496414 1.279357377 1.984280251 0.901686157 0.742532694 1  
1.170435909 2.914657008 6.299905909 4.446052236 2.593300078 1  
1.475800615 2.311694994 1.997104719 1.106492729 4.443809567 1.722352415

YLR180W YLR180W::SAM1::S-adenosylmethionine synthetase 1 1.109283479  
0.752340656 0.541701676 0.323096707 1 0.916617719 0.84197265  
0.463885567 0.391656498 1 0.994760121 0.910455383 0.571340099  
0.306729812 1 1.154464182 0.663486919 0.518115826 0.441278405 1  
1.171700428 0.424267323 0.36028605 0.589167896 1 0.75866843  
0.429811165 0.582024451 1.678655587 0.793051492 1 0.694607882  
0.353618286 0.134615622 0.536784578 1.410237101 1 0.789340634  
0.409217123 0.61572196 1.09553405 1.105669329 0.850230918

YLR182W YLR182W::SWI6::Involved in cell cycle dependent gene expression  
0.932084295 0.96913413 0.930297491 1.086655604 0.952842937  
0.806212418 0.944710739 0.961484204 0.767987613 0.79328775  
0.625182841 1.071992983 1 0.860322948 0.468315487  
0.991870282 0.645212388 1 0.856033165 0.974418401  
0.794504159 0.814445395 0.902488799 1 0.818803392 0.876003989

|         |                                                                                                                                      |             |             |             |             |             |             |
|---------|--------------------------------------------------------------------------------------------------------------------------------------|-------------|-------------|-------------|-------------|-------------|-------------|
|         | 0.876544671                                                                                                                          | 0.787501228 | 0.915156006 | 1           | 1.027165674 | 1.074702651 |             |
|         | 0.995335178                                                                                                                          | 1.263660936 | 0.945673958 |             |             |             |             |
| YLR184W | YLR184W::YLR184W::molecular_function unknown                                                                                         |             |             |             |             | 1           |             |
|         | 1                                                                                                                                    |             | 1.704634349 | 1           | 1.533208838 |             |             |
|         | 2.541052797                                                                                                                          | 1.892886404 | 1           | 0.791942941 | 1.238083938 | 0.702142212 |             |
|         | 0.610173535                                                                                                                          |             | 0.840943752 |             |             |             |             |
|         |                                                                                                                                      |             | 1           |             |             |             |             |
|         | 0.950927634                                                                                                                          |             |             |             |             |             |             |
| YLR186W | YLR186W::EMG1::Essential for Mitotic Growth                                                                                          |             |             |             |             | 1           | 0.836710276 |
|         | 0.792748756                                                                                                                          | 0.94309068  | 0.936578023 | 1           | 0.845036099 | 0.847533526 |             |
|         | 1.17488422                                                                                                                           | 1.309729983 | 1           | 0.712704119 | 0.51326254  | 0.619776595 |             |
|         | 1.084433392                                                                                                                          | 1           | 0.21173856  | 0.152696766 | 0.174746752 | 0.381002545 |             |
|         | 0.468127869                                                                                                                          | 0.337238643 | 0.303358521 | 0.886446709 | 1           | 0.803523622 |             |
|         | 0.736547577                                                                                                                          | 0.720446663 | 1.116834176 | 0.999407799 | 1           | 0.727677088 |             |
|         | 0.65979125                                                                                                                           | 0.516119727 | 0.774544621 | 0.556025335 | 1           | 0.93413646  |             |
|         | 0.626624271                                                                                                                          | 0.956430521 | 0.800080462 | 0.663136846 | 0.784559128 |             |             |
| YJR084W | YJR084W::CSN12::COP9 signalosome (CSN)                                                                                               |             |             |             |             | 1           | 1.018104971 |
|         | 1.238742632                                                                                                                          | 1.085237249 | 1.172003814 | 1           | 1.120220979 | 1.047842095 |             |
|         | 1.411945721                                                                                                                          | 1.255976184 | 1           | 1.120836909 | 1.175079352 | 1.330522152 |             |
|         | 1.285659284                                                                                                                          | 1           | 1.004773791 | 0.838281741 | 0.925547781 | 0.938573476 |             |
|         | 1.922277019                                                                                                                          | 2.004260957 | 1.855388625 | 0.885913763 | 1           | 1.081253223 |             |
|         | 1.123133762                                                                                                                          | 1.174685958 |             | 1.220116216 | 1           | 1.19262895  |             |
|         | 1.123775265                                                                                                                          | 0.993528381 | 0.992941976 | 1           | 0.814624916 | 0.932294606 |             |
|         | 0.869781905                                                                                                                          | 0.992545804 | 0.746181895 | 1.198729219 |             |             |             |
| YLR200W | YLR200W::YKE2::Yeast nuclear gene encoding a protein showing<br>homology to mouse KE2 and containing a putative leucine-zipper motif |             |             |             |             | 1           |             |
|         | 0.991388245                                                                                                                          | 1.610076691 | 0.958276089 | 1.963897249 | 1           | 1.158236022 |             |
|         | 1.074744042                                                                                                                          | 1.587582591 | 1.509956238 | 1           | 1.118809544 | 1.299105619 |             |
|         | 1.744628809                                                                                                                          | 1.147634164 | 1           | 0.749101164 | 0.797701414 | 0.727577236 |             |
|         | 1.072282106                                                                                                                          | 1           | 1.399124039 | 1.722358045 | 1.495809224 | 1.192033619 |             |
|         | 0.772085769                                                                                                                          | 0.97373542  | 0.504764617 | 0.459695186 | 0.948668938 | 1           |             |
|         | 1.433833224                                                                                                                          | 1.713683598 |             | 2.006136724 | 2.90992138  | 1           |             |
|         | 1.189462332                                                                                                                          | 1.345289882 | 1.594561479 | 1.728974247 | 1.366849055 |             |             |
| YJR086W | YJR086W::STE18::gamma subunit of G protein coupled to mating factor<br>receptors                                                     |             |             |             |             | 1           |             |
|         | 1.052706343                                                                                                                          | 0.967631102 | 1.71856424  | 1.448858765 | 1           | 1.086331693 |             |
|         | 1.464484607                                                                                                                          | 1.946585553 | 1.293675845 | 1           | 1.671814008 | 1.35669531  |             |
|         | 1.158956753                                                                                                                          | 1.985704111 | 1           | 1.876861418 | 2.375608611 | 2.028466948 |             |
|         | 0.761682744                                                                                                                          | 0.932617482 | 0.561913427 | 0.524071734 | 0.828211197 | 1           |             |
|         | 0.920299536                                                                                                                          | 1.423178348 | 0.885694026 | 0.653523596 | 0.947209064 | 1           |             |
|         | 1.408776391                                                                                                                          | 1.759850885 | 0.924011089 | 2.231834048 | 0.964215029 | 1.872084122 |             |
| YLR202C | YLR202C::YLR202C::molecular_function unknown                                                                                         |             |             |             |             | 1           | 1.504585819 |
|         | 1.817589766                                                                                                                          | 1.256653463 | 1.521776503 | 1           | 1.49757939  | 1.652617301 |             |
|         | 1.923064725                                                                                                                          | 1.631458088 | 1           | 1.52935967  | 1.52988597  | 2.991880744 |             |
|         | 1.023761482                                                                                                                          |             | 0.47094228  | 0.337091227 | 0.440045564 | 0.482729964 |             |
|         | 1.470520645                                                                                                                          | 3.864335585 | 2.504885845 | 1.622597429 | 1           | 0.809267356 |             |
|         | 0.942724841                                                                                                                          | 0.633241429 | 0.647169932 | 0.819980891 | 1           | 0.920907429 |             |
|         | 1.754916949                                                                                                                          | 0.936486975 | 0.986488712 | 1.711332008 | 1           | 1.535405502 |             |
|         | 1.412556931                                                                                                                          | 1.702537334 | 2.352972185 | 1.550730128 |             |             |             |
| YJR088C | YJR088C::YJR088C::molecular_function unknown                                                                                         |             |             |             |             | 1           | 1.145219311 |
|         | 0.991919527                                                                                                                          | 1.15627518  | 1.228706362 | 1           | 1.083171235 | 1.004729139 |             |
|         | 1.374860026                                                                                                                          | 1.186096641 | 1           | 0.944676089 | 1.208789275 | 1.082739382 |             |
|         | 1.222946482                                                                                                                          | 1           | 1.89237524  | 1.872831133 | 1.429285086 | 2.252765075 |             |
|         | 1.231137218                                                                                                                          | 0.710978545 | 0.655777987 | 0.814141651 | 1           | 1.163666609 |             |
|         | 1.261467295                                                                                                                          | 1.157186361 | 1.119865819 | 1.288978642 | 1           | 1.365628013 |             |
|         | 1.253619288                                                                                                                          | 1.011194655 | 1.012689401 | 0.903918024 | 1           | 1.229497363 |             |
|         | 1.197565307                                                                                                                          | 1.003994431 | 1.250966633 | 0.75139091  | 1.61465064  |             |             |



|         |                                                     |             |                                     |                           |                         |
|---------|-----------------------------------------------------|-------------|-------------------------------------|---------------------------|-------------------------|
| YLR204W | YLR204W::QRI5::Product of gene unknown              | 1           | 1.311187673                         |                           |                         |
|         | 1.751225335 1.294336145 2.083140741                 | 1           | 1.445017424 1.53530622              |                           |                         |
|         | 2.047521708 2.273261085                             | 1           | 1.151604335 1.674526788 2.504265167 |                           |                         |
|         | 1.420268116                                         | 0.864635183 | 0.744526922 0.645015247 1           |                           |                         |
|         | 2.527862103 2.904470396 2.41489288                  | 1.490457863 | 1                                   | 1.044297587               |                         |
|         | 1.302616256 0.788386631 0.847360478                 | 0.969105501 | 1                                   | 1.086116025               |                         |
|         | 1.107871077 1.05760311 1.142194311                  | 1.72714232  | 1                                   | 0.947513513               |                         |
|         | 0.999481697 1.181868641 1.469794703                 | 1.750247228 | 1.517456427                         |                           |                         |
| YJR102C | YJR102C::VPS25::vacuolar protein sorting (putative) | 1           |                                     |                           |                         |
|         | 1.517532311 1.590920284 1.315731698                 | 1.513654858 | 1                                   | 1.404265178               |                         |
|         | 1.338777777                                         | 1           | 1.106030341 1.272643178             | 1.868714833 1.366275547 1 |                         |
|         | 1.115975516                                         | 1.150547426 | 0.957672218                         | 1                         | 1.482436286 2.211363205 |
|         | 1.264738605 1.142205637                             | 1           | 1.071476634                         | 0.985384937 0.932826106   |                         |
|         | 0.773477971 0.94005443                              | 1           | 1.248656384                         | 2.168439823 1.219142314   |                         |
|         | 1.18465605 1.514028116                              | 1           | 1.188818995                         | 1.525188874 1.053288989   |                         |
|         | 1.227188702 1.297321759                             |             |                                     |                           |                         |
| YJR104C | "YJR104C::SOD1::Cu, Zn superoxide dismutase"        | 1           | 1.038514788                         |                           |                         |
|         | 1.551613859 1.100525788 1.459502664                 | 1           | 1.11643956                          | 1.396449448               |                         |
|         | 1.72294888 1.638544009                              | 1           | 1.794096036                         | 2.343455472 3.385929097   |                         |
|         | 1.182491546                                         | 1           | 2.124500139 2.451910275             | 3.468019716 1.750568256 1 |                         |
|         | 2.536491487 4.456451788 4.598306476                 | 1.822666667 | 1                                   | 2.150733655               |                         |
|         | 3.051174234 3.792100276 1.227789141                 | 0.844247935 | 1                                   | 1.80057049                |                         |
|         | 5.859957848 5.698096608 2.620479801                 | 1.554443021 | 1                                   | 1.652368507               |                         |
|         | 3.200443112 2.48464804                              | 0.921278437 | 1.043891206                         | 1.894850366               |                         |
| YPR023C | YPR023C::EAF3::Esalp-Associated Factor              | 1           | 0.806262926                         |                           |                         |
|         | 0.777487736 0.993459548 0.83224469                  | 1           | 0.996011143                         | 0.940396924               |                         |
|         | 0.924765575                                         | 1           | 0.888278104 0.960980761             | 0.936367299 0.894574578 1 |                         |
|         | 1.190347683 0.702405606 0.903678277                 | 0.808334946 | 1                                   | 1.583990004               |                         |
|         | 1.183367228 1.585100484 1.332124486                 | 1           | 0.959666957                         | 1.169750808               |                         |
|         | 1.132074675 1.042347773 0.992973187                 | 1           | 1.144760417                         | 1.075026234               |                         |
|         | 0.887906499 0.933713886 0.872459124                 | 1           | 1.158140277                         | 0.975682585               |                         |
|         | 0.903902578 0.806635084 0.863989871                 | 0.825713448 |                                     |                           |                         |
| YJR106W | YJR106W::ECM27::ExtraCellular Mutant                | 1           | 1.134887542                         |                           |                         |
|         | 0.923166562 1.118848656 0.937615668                 | 1           | 1.204411095                         | 1.230704096               |                         |
|         | 0.999200597 0.853497496                             | 1           | 1.421354988                         | 1.274798628 0.587496566   |                         |
|         | 0.948127212                                         | 1           | 0.644460927 1.53988485              | 0.519362584 0.569045089 1 |                         |
|         | 1.079369249                                         | 0.622327174 | 0.928172567                         | 1                         | 1.226895707 0.993405593 |
|         | 0.547395233 0.954062784 1.203873002                 | 1           | 0.761517163                         | 0.951606867               |                         |
|         | 0.756399228 0.681261095 1.49417372                  | 1           | 0.731247975                         | 1.194502476               |                         |
|         | 0.77862864 1.574329323 0.967836106                  | 0.992082006 |                                     |                           |                         |
| YPR025C | YPR025C::CCL1::essential for cell proliferation     | 1           | 0.759244989                         |                           |                         |
|         | 0.92308749 0.799758735 0.896563221                  | 1           | 0.690374487                         | 0.78198114                |                         |
|         | 0.663278524 0.814335358                             | 1           | 0.89131112                          | 0.886278778 0.773837431   |                         |
|         | 0.807329067                                         | 1           | 0.742130501 0.506271343             | 0.585183743 1             |                         |
|         | 1.568474163 1.616071456 1.159672057                 | 1           | 1.017393513                         | 1.059241405               |                         |
|         | 0.701216475 0.6686278 0.98177468                    | 1           | 1.172110356                         | 1.13671665                |                         |
|         | 0.768376393 1.514445562                             | 1           | 1.361057057                         | 1.217924092 1.206505161   |                         |
|         | 1.075060504 1.906683154                             | 1.245137372 |                                     |                           |                         |
| YJR108W | YJR108W::ABM1::aberrant microtubules                | 1           | 1.521016601                         |                           |                         |
|         | 1.805751564 1.36955964 1.163256982                  | 1           | 1.258219984                         | 1.12710904                |                         |
|         | 1.268192067                                         | 1           | 1.437316661                         | 1.023460096 0.734568938 1 |                         |
|         | 0.891695749 0.561682075 1.038241265                 |             | 0.254952569                         |                           |                         |
|         | 0.40876237                                          | 1           | 0.970776474 0.889973596             | 0.831068976 0.928220363 1 |                         |
|         | 1.097273661 1.256099568 1.361154255                 |             | 1.686262576                         | 1                         | 1.071605038             |
|         | 1.157340223 0.952305042 1.111213911                 | 1.005655105 | 1.624282537                         |                           |                         |
| YPR027C | YPR027C::YPR027C::molecular_function unknown        | 1           | 1.145019504                         |                           |                         |
|         | 1.027792303 0.814233997 1.016922649                 | 1           | 1.155896381                         | 0.787207643               |                         |

|         |                                                                                         |             |             |             |             |             |             |             |
|---------|-----------------------------------------------------------------------------------------|-------------|-------------|-------------|-------------|-------------|-------------|-------------|
|         | 0.866372481                                                                             | 0.953785135 | 1           | 0.788011317 | 1.05980991  | 0.631475054 | 1           |             |
|         | 1.131564577                                                                             | 0.699674177 | 1.107467037 | 1           |             |             | 1           |             |
|         | 1.025431511                                                                             | 1.077125271 | 0.752752115 | 0.969739608 | 0.853564932 | 1           |             |             |
|         | 0.894741933                                                                             | 0.821408728 | 2.235214961 | 1           | 1.056642879 | 0.913597534 |             |             |
|         | 1.038692088                                                                             | 0.881255421 | 1.251295817 | 1.17596308  |             |             |             |             |
| YJR110W | YJR110W::YJR110W::molecular_function unknown                                            |             |             |             |             |             | 1           |             |
|         | 0.889869776                                                                             | 1.137536996 | 0.969598611 | 1           | 1.239327897 | 1.063233943 |             |             |
|         | 0.897449984                                                                             | 0.903701411 | 1           | 1.368230507 | 1.109271843 | 0.781022426 |             |             |
|         | 1.02494998                                                                              | 1           | 0.920595429 |             | 0.767718928 | 1           | 1.424918786 |             |
|         | 2.293138099                                                                             | 1.554448515 | 1.438599759 | 1           | 1.105352188 | 1.17964427  |             |             |
|         | 0.923991955                                                                             | 0.972548845 | 1.11687039  | 1           | 1.063946329 | 0.932312942 |             |             |
|         | 1.173714784                                                                             | 0.865763869 | 0.899069992 | 1           | 1.262891113 | 1.065319218 |             |             |
|         | 1.021778543                                                                             | 0.94841067  | 1.470958131 | 1.032360714 |             |             |             |             |
| YPR041W | "YPR041W::TIF5::eIF5 mediates hydrolysis of eIF2-GTP (SUI2,SUI3,GCD11) at start codons" |             |             |             |             |             |             |             |
|         | 0.806376443                                                                             | 1           | 1.003731162 | 0.92816049  | 0.891239412 | 1.00076811  | 1           |             |
|         | 0.775608364                                                                             | 0.687970357 | 0.671810367 | 0.869895284 | 1           | 0.890504771 |             |             |
|         | 0.565167301                                                                             | 0.566977403 | 0.869991074 | 1           | 0.736601241 | 0.609497621 |             |             |
|         | 0.562233247                                                                             | 0.90851428  | 1           | 0.879313279 | 0.82182823  | 0.696794817 |             |             |
|         | 0.848308669                                                                             | 0.843459585 | 1           | 0.814805221 | 0.925079706 | 0.507468865 |             |             |
|         | 0.565280988                                                                             | 0.926625979 | 1           | 0.730672751 | 0.858767693 | 0.83346087  |             |             |
|         | 1.148188841                                                                             | 0.841598207 | 1.031485049 |             |             |             |             |             |
| YJR112W | YJR112W::NNF1::Involved in nuclear function                                             |             |             |             |             |             | 1           | 0.94242127  |
|         | 1.226554211                                                                             | 0.808704023 | 1.345091039 | 1           | 1.04737206  | 1.238775014 |             |             |
|         | 1.288340148                                                                             | 1           | 0.907424982 | 0.642681678 | 0.577189645 | 1.070722108 | 1           |             |
|         | 0.320311718                                                                             |             | 0.328907701 | 0.782692996 | 1           | 0.759627179 | 1.44539363  |             |
|         | 0.865829239                                                                             | 1.246451429 | 1           | 0.730918113 | 0.602376872 | 0.600774934 |             |             |
|         | 0.863890165                                                                             | 0.947420958 | 1           | 0.800337221 | 0.930853654 | 0.879265419 |             |             |
|         | 1.408323558                                                                             | 1           | 0.572917624 | 0.591376663 | 1.046692239 | 1.022669922 |             |             |
|         | 0.85260456                                                                              | 1.170709299 |             |             |             |             |             |             |
| YPR043W | YPR043W::RPL43A::Homology to human L37a                                                 |             |             |             |             |             | 1           | 1.021629336 |
|         | 1.532639398                                                                             | 0.859709486 | 1.710474434 | 1           | 0.844463122 | 1.392097561 |             |             |
|         | 1.497870576                                                                             | 1.328200773 | 1           | 0.986233553 | 0.9320781   | 1.15010392  |             |             |
|         | 0.917694563                                                                             | 1           | 0.63867187  | 0.337118062 | 0.198629867 | 1           |             |             |
|         | 1.629970494                                                                             | 1.736673995 | 0.814889726 | 0.829275687 | 1           | 0.945548313 |             |             |
|         | 0.950708224                                                                             | 0.790703917 | 0.97963906  | 0.996363828 | 1           | 1.046722047 |             |             |
|         | 1.782470651                                                                             | 1.147980088 | 0.838477371 | 1.886212183 | 1           | 1.049359097 |             |             |
|         | 1.507616352                                                                             | 1.095792961 | 1.996612027 | 1.34361078  | 1.170709299 |             |             |             |
| YJR126C | YJR126C::VPS70                                                                          |             |             |             |             |             | 1           | 0.888917918 |
|         | 0.856279792                                                                             |             |             |             |             | 0.749334788 | 1           |             |
|         | 1.019169724                                                                             | 0.919291139 | 0.809297498 | 0.793918124 | 1           | 0.946133805 |             |             |
|         | 0.956813083                                                                             | 0.83234333  | 1.060633209 | 1           | 1.019616742 | 0.717333162 |             |             |
|         | 0.791442339                                                                             | 0.651028414 | 1           | 1.086025441 | 1.16843329  | 0.836792636 | 1           |             |
|         | 1.009210364                                                                             | 0.936977861 |             | 1.179039082 | 1.345883411 | 1           | 0.821179292 |             |
|         | 0.616018385                                                                             | 0.737832609 | 0.781502189 | 0.692504349 | 1           | 0.880922936 |             |             |
|         | 0.784537448                                                                             | 0.961420347 | 0.664461133 | 0.92178101  | 0.704001714 |             |             |             |
| YPR045C | YPR045C::YPR045C::molecular_function unknown                                            |             |             |             |             |             | 1           | 0.621962588 |
|         | 0.75796232                                                                              | 0.912628693 | 0.674891166 | 1           | 0.861806969 | 1.018851962 |             |             |
|         | 0.877609437                                                                             | 1           | 0.804965681 | 0.937410251 | 1.065942895 | 0.831971267 | 1           |             |
|         | 0.45617159                                                                              | 0.47858434  | 0.703324676 | 0.776331453 | 1           | 1.213369954 |             |             |
|         | 1.501615707                                                                             | 1.398892566 | 0.998699593 | 1           | 1.031929127 | 1.18601168  |             |             |
|         | 1.136140111                                                                             | 1.05052731  | 1.111623464 | 1           | 1.098265849 | 0.795669941 |             |             |
|         | 1.206009162                                                                             | 1.178973217 | 0.812604778 | 1           | 1.235991294 | 1.131154534 |             |             |
|         | 1.226188032                                                                             | 1.039701857 | 1.356147586 | 0.876499665 |             |             |             |             |
| YPR047W | YPR047W::MSF1::alpha subunit of yeast mitochondrial phenylalanyl-tRNA synthetase        |             |             |             |             |             |             |             |
|         | 1                                                                                       | 0.687810658 |             | 0.84888866  | 1           | 1.089636631 |             |             |
|         | 1.474769882                                                                             | 1.020105654 | 1           | 1.056438409 | 1.157568928 | 1.143421187 |             |             |
|         | 0.844438081                                                                             | 1           | 1.11404617  | 0.733954384 | 1.313783235 | 1.316263342 | 1           |             |

|          |                                                                                           |             |             |             |             |             |
|----------|-------------------------------------------------------------------------------------------|-------------|-------------|-------------|-------------|-------------|
|          | 2.026529283                                                                               | 3.137873109 | 2.569980691 | 1.344351786 | 1           | 1.063543781 |
|          | 1.718436273                                                                               | 1.256460443 |             | 1           | 1.273791745 | 1.357615426 |
|          | 1.378492727                                                                               | 1.142487273 | 1.285124125 | 1           | 1.097364524 | 1.392495415 |
|          | 1.118207044                                                                               | 1.014863403 | 1.662384244 | 1.096281225 |             |             |
| YPR049C  | "YPR049C::CVT9::Oligomeric, coiled-coil, peripheral membrane protein"                     |             |             |             |             |             |
|          | 1                                                                                         | 1.357732835 | 0.995183606 | 1.247593264 | 1.024034745 | 1           |
|          | 1.071216202                                                                               | 1.202801598 | 1.10589172  | 1.043600898 | 1           | 0.985259337 |
|          | 0.964649355                                                                               | 0.939688957 | 1.153129343 | 1           | 0.631420544 | 0.52826651  |
|          | 0.59004408                                                                                | 1           | 0.77108935  | 1.068017158 | 0.771433677 | 1           |
|          | 0.984180098                                                                               | 0.989454917 | 1.343367174 | 1.275914956 | 0.886777738 | 1           |
|          | 0.941555672                                                                               | 0.916852744 | 0.855597899 | 1.407748187 | 0.97817156  | 1           |
|          | 0.645766681                                                                               | 0.944461556 | 0.921892646 | 1.087381121 | 0.771681388 | 1.457913927 |
| YPR051W  | YPR051W::MAK3::N-acetyltransferase                                                        |             |             |             |             |             |
|          | 1                                                                                         | 1.159879438 | 1.453577981 |             |             |             |
|          | 1.091125688                                                                               | 1.671159066 | 1           | 1.097979884 | 1.160444639 | 1.549240428 |
|          | 0.977277351                                                                               | 1.164273086 | 1.588855938 | 1.210086496 | 1           | 1.291687325 |
|          | 1.365565974                                                                               | 1.384621288 | 1.407891429 | 1           | 1.054090275 | 1.130411753 |
|          | 1.109891478                                                                               | 0.626504125 | 1           | 0.92718394  | 0.730342851 | 0.702322567 |
|          | 0.972916517                                                                               | 1.137566673 | 1           | 1.128454695 | 0.947756635 | 0.689504293 |
|          | 1.209157186                                                                               | 1.873954425 | 1           | 1.127935354 | 0.892595281 | 1.169899178 |
|          | 1.423192402                                                                               | 1.269233337 | 1.483307061 |             |             |             |
| YPR065W  | YPR065W::ROX1::The ROX1 gene encodes a heme-induced repressor of hypoxic genes in yeast.  |             |             |             |             |             |
|          | 1                                                                                         | 1.329653789 | 1.47386737  | 1.304875837 | 1.338731488 | 1           |
|          | 1.679096922                                                                               | 1.344079355 | 1.145031877 | 1.105015472 | 1           | 2.147132584 |
|          | 1.465431195                                                                               | 1.089033892 | 1.195272041 | 1           | 2.638592363 | 1.355897869 |
|          | 0.939000122                                                                               | 1.12774219  | 1           | 2.432656297 | 1.118931768 | 1           |
|          | 2.178154264                                                                               | 1.477320662 | 1.231327089 | 0.87323032  | 1.022740212 | 1           |
|          | 1.431611338                                                                               | 1.099308847 | 0.636788668 | 0.939680937 | 0.800875096 | 1           |
|          | 1.183745492                                                                               | 0.950745052 | 0.618559547 | 0.884287974 | 0.750965663 | 2.125139488 |
| YLR206W  | YLR206W::ENT2::epsin N-terminal homology-containing protein                               |             |             |             |             |             |
|          | 1                                                                                         | 1.048809393 | 1.015485371 | 0.881790558 | 1           | 1.205269957 |
|          | 1.10863321                                                                                | 0.9931346   | 0.819215475 | 1           | 1.363218375 | 1.469623581 |
|          | 1.119752078                                                                               | 1.032945953 | 1           | 1.898416712 | 1.455069683 | 1.538371628 |
|          | 0.709036076                                                                               | 1           | 1.367230659 | 1.193644709 | 1           | 1.089763056 |
|          | 1.205846193                                                                               | 1.063284632 | 0.838202011 | 1.098398204 | 1           | 1.128441924 |
|          | 1.11083319                                                                                | 1.396356089 | 0.809815053 | 0.818974581 | 1           | 1.094640771 |
|          | 1.092116542                                                                               | 1.186099281 | 0.759077217 | 1.01442477  | 0.991206341 |             |
| YFL013WA | YFL013WA::YFL013W-A::molecular_function unknown                                           |             |             |             |             |             |
|          | 1                                                                                         | 1.2592546   |             |             |             |             |
|          | 1.200721266                                                                               | 1           | 1.21983905  | 1.341601653 | 1.285988676 | 1           |
|          | 1.242172908                                                                               | 1.530236629 | 0.999868341 | 1.438642589 | 1           |             |
|          | 0.910672805                                                                               | 1.026261792 | 1           | 0.880225083 | 5.184151119 | 1.265588842 |
|          | 0.843611648                                                                               | 1           |             | 1           |             |             |
|          | 2.851505537                                                                               | 1           | 2.012474834 |             | 0.937793286 |             |
| YLR208W  | YLR208W::SEC13::cytoplasmic protein involved in release of transport vesicles from the ER |             |             |             |             |             |
|          | 1                                                                                         | 1.068480927 | 1.015866713 | 0.964039937 | 0.92442986  | 1           |
|          | 1.01110007                                                                                | 0.993119946 | 0.994008071 | 1.060167    | 1           | 0.751477092 |
|          | 0.918848035                                                                               | 0.93118427  | 0.971950108 | 1           | 1.135488016 | 1.433559015 |
|          | 1.05059909                                                                                | 1.060898387 | 1           | 1.537796342 | 1.361615884 | 1.352146191 |
|          | 1.305655835                                                                               | 1           | 1.112891111 | 1.127940849 | 1.248341765 | 1.227327684 |
|          | 0.869334481                                                                               | 1           | 1.035600617 | 1.149697404 | 1.045119517 | 0.781552688 |
|          | 0.872322791                                                                               | 1           | 0.996276424 | 1.038640465 | 0.961426269 | 0.981272768 |
|          | 0.976049551                                                                               | 1.14706739  |             |             |             |             |
| YHR039CB | YHR039CB                                                                                  |             |             |             |             |             |
|          | 1                                                                                         | 0.987929625 | 1.417430791 | 0.889694825 | 1.491543508 | 1           |
|          | 1.006416421                                                                               | 0.972839596 | 1.506310393 | 1.185531471 | 1           | 1.237987514 |
|          | 1.421102154                                                                               | 1.08305075  | 0.908434861 | 1           | 1.042414758 | 0.579043138 |
|          | 0.290707516                                                                               | 0.629327431 | 1           | 1.63144557  | 2.108061747 | 2.041445958 |
|          | 0.924977718                                                                               | 1           | 1.050753264 | 1.163474372 | 1.323335966 | 1.292611008 |
|          | 0.953215965                                                                               | 1           | 0.818617562 | 0.83939811  | 0.802148866 | 0.818721315 |

0.930255734 1 1.030305954 0.805833541 0.93285569 0.882173433  
 0.982557469 0.70049921  
 YLR210W YLR210W::CLB4::Involved in mitotic induction 1.004730173  
 1.021519763 0.959369246 0.926104654 1.023065195 1.084103021  
 0.963260457 0.985025691 1.087480076 1.378205223 0.983932581  
 1.163038897 1 0.806618041 0.954201274 1.025090035 1  
 1.917020513 1.321789345 1 0.735505186 0.840283876  
 0.923590039 0.846693595 1 0.786723444 0.697712728 0.676009427  
 0.776189435 1.157628101 1 0.989192007 0.827970207 0.834521826  
 1.230596136  
 YMR166C YMR166C::YMR166C::molecular\_function unknown 1 1.130465993  
 1.157350316 1.130988194 1.038258472 1 1.130430863 1.310845144  
 1.022991106 1.041166962 1 1.180513379 1.202806919 1.081273537  
 0.969139213 1 1.11235154 1.303129708 1.063798209  
 0.796290246 0.608311169 1 1.111168741 1.244064198  
 1.251135347 1.133565986 1.099548212 1 0.81652722 0.916347253  
 0.706654849 0.70900203 0.692323359 1 0.835034755 1.025205842  
 1.089509859 1.085816369 1.199358701 1.150569945  
 YLR224W YLR224W::YLR224W::molecular\_function unknown 1 0.941790208  
 0.902532898 1.021886562 0.963290497 1 0.940404083 1.079707031  
 1.077530873 1.144588692 1 0.804367749 0.875839697 0.946868306  
 1.036742024 1 1.216826617 0.995196816 1.134963721 0.954665426 1  
 1.600400948 0.867280861 0.658625007 1.181987316 1 0.795374361  
 0.895359114 0.922616519 0.860194077 0.856985057 1 0.697047178  
 0.665541313 0.773059181 0.733386041 0.765850392 1 0.954128111  
 0.833675128 1.197469368 1.126411634 1.160025983 0.977196433  
 YLR226W YLR226W::BUR2::bypass UAS Requirement 1 0.993548453  
 1.132946753 1.24560717 1.110479613 1 1.026217444 1.184222583  
 1.069151083 1.11501548 1 0.801168064 0.842221007 0.615796084  
 1.013771956 1 0.698437477 0.516002722 0.756035462 1  
 1.342236819 0.919904886 1.362880606 1.233095142 1 0.819657099  
 1.119964161 0.993972349 1.022658301 1.027631182 1 1.017189912  
 1.000541521 0.833665096 1.182686379 1.102411013 1 1.096525174  
 1.099752211 1.136429983 1.002792736 1.171335046 0.98245011  
 YLR228C YLR228C::ECM22::involved in cell wall biogenesis (putative) 1  
 0.968685063 0.888778043 0.931892223 0.731495205 1 0.96555889  
 0.929230607 0.847244061 0.753335249 1 1.041619384 0.827383478  
 0.497451567 0.983845925 1 1.119109615 0.641484883 0.35413504 1  
 1.696794379 1.03289926 0.51976436 1 1.276736021 1.093194578  
 1.14564282 1.183072794 1.037431962 1 1.007705684 0.649277778  
 0.738650801 0.567647735 1 1.009605575 0.727141892 0.757680821  
 0.585285207 0.619876779 0.706628552  
 YLR230W YLR230W::YLR230W::molecular\_function unknown 1 1.054987823  
 0.864550934 0.676268209 0.858842148 1 0.840004707 0.84423327  
 0.771104092 0.867443933 1 0.948504715 0.852960059 0.826397162  
 0.710062664 1.464016225 0.819353171 0.790790925 1.093362728 1  
 1.547157997 0.637544225 0.638749055 0.92621035 1 1.188922522  
 1.308908738 1.129857227 1.448389271 1.008277725 1 0.977127633  
 0.944812728 0.739821438 0.670785998 0.657457748 1 1.06788849  
 1.034384485 0.880769375 0.827611548 1.071938721 1.01484825  
 YJR128W YJR128W::YJR128W::molecular\_function unknown 0.950553582  
 0.906499132 0.916879712 0.877156251 0.946789302 0.853442825  
 1.007328167 0.91989723 0.899059475 1.097283486 1.1072366 1  
 0.635629451 1.481958573 1.193520629 0.710928537 1 0.916257707  
 0.913468706 0.810244735 0.566012898 1 0.911933273 0.874030226  
 0.791401133 0.998944181 1.161018141 1 0.686131495 0.548557146

|         |                                                    |             |             |             |             |             |
|---------|----------------------------------------------------|-------------|-------------|-------------|-------------|-------------|
|         | 0.587011485                                        | 0.794847472 | 1           | 0.807474476 | 0.557660113 |             |
|         | 1.254570755                                        | 0.979823219 |             |             |             |             |
| YLR232W | YLR232W::YLR232W::molecular_function unknown       |             |             | 1           | 0.960661151 |             |
|         | 0.889830364                                        | 1.364073454 | 0.990906686 | 1           | 1.247849723 | 1.086421782 |
|         | 0.899188796                                        | 0.976709428 | 1           | 0.948993784 | 1.127991186 | 0.767414067 |
|         | 1.155893137                                        |             |             |             |             |             |
|         | 0.800254281                                        | 0.821483909 | 1.016330846 | 1.245920326 | 1.220185274 | 1           |
|         | 0.79347154                                         | 0.455639884 | 0.809742831 | 1.552518388 | 0.563959879 | 1           |
|         | 0.694014059                                        | 0.476646871 | 1.131997921 | 0.313005448 | 0.907928357 | 0.535006265 |
| YJR130C | YJR130C::STR2::Sulfur TRansfer                     |             |             | 1           | 1.179572951 | 1.064794833 |
|         | 0.871282396                                        | 1.135662892 | 1.359796955 |             | 1.092820968 |             |
|         | 2.742812915                                        | 1.546382267 | 0.944201361 | 1.098425637 | 1           | 0.939982498 |
|         | 1.151448279                                        | 0.949674402 | 0.755383277 | 1           | 4.258852673 | 5.053294078 |
|         | 1.078646561                                        | 3.096314752 | 1           | 0.915248567 | 1.033378037 | 1.276445413 |
|         | 1.184263624                                        | 0.943281636 | 1           | 1.079701768 | 1.111526318 | 1.28687058  |
|         | 1                                                  | 0.903082795 | 0.796910019 | 0.781637516 | 0.56286694  | 0.58318677  |
|         | 0.667225509                                        |             |             |             |             |             |
| YLR234W | YLR234W::TOP3::DNA Topoisomerase III               |             |             | 1           | 0.755454803 |             |
|         | 0.665598358                                        | 0.846319173 | 0.623017071 | 1           | 0.850158787 | 0.977399259 |
|         | 0.702835289                                        | 0.652950931 | 1           | 0.968474578 | 0.852585534 | 0.499291164 |
|         | 0.580319363                                        | 1           | 0.49479058  | 1.256280314 | 0.619485191 |             |
|         | 0.473712925                                        | 0.478338957 | 1           | 0.85724496  | 0.975206944 | 1.117930852 |
|         | 0.906912178                                        | 1           | 0.940449276 | 0.757023001 | 1.11328123  | 1.45006534  |
|         | 0.554686894                                        | 1           | 0.698232923 | 1.031970829 | 0.240755269 |             |
|         | 0.691742979                                        |             |             |             |             |             |
| YLR248W | YLR248W::RCK2::Serine/threonine protein kinase     |             |             | 1           | 0.766002374 |             |
|         | 0.812155459                                        | 0.977443628 | 0.798012861 | 1           | 1.070622974 | 0.968499871 |
|         | 0.839927155                                        | 0.860641147 | 1           | 0.925864907 | 0.93353512  | 0.778206444 |
|         | 0.695696563                                        | 1           | 0.80409046  | 0.844139386 | 0.80425233  | 1           |
|         | 1.04803089                                         | 0.93188567  | 1.19164556  | 1.242647243 | 1           | 0.988007396 |
|         | 1.094352484                                        | 1.385621704 | 1.168179829 | 0.912829962 | 1           | 1.084981437 |
|         | 0.958913226                                        | 1.081929458 | 0.922165886 | 0.627637889 | 1           | 1.08747026  |
|         | 0.760552545                                        | 1.198921825 | 0.711105904 | 0.958113109 | 0.646210491 |             |
| YJR132W | YJR132W::NMD5::Involved in nuclear import          |             |             | 1           | 0.780991682 |             |
|         | 0.527094697                                        | 0.380932857 | 1           | 0.725444845 | 0.759676574 | 0.499290176 |
|         | 0.5270753                                          | 1           | 0.83032685  | 0.563207883 | 0.732666284 | 1           |
|         | 0.608781028                                        | 0.471260248 | 1           | 0.483234074 | 0.41116039  | 0.372388848 |
|         | 0.539480233                                        | 1           | 0.896852806 | 0.797967517 | 1.20147688  | 1.344033646 |
|         | 1.011475117                                        | 1           | 1.27124997  | 0.665933148 | 0.880799793 | 0.95336684  |
|         | 0.52957648                                         | 1           | 0.612280639 | 0.527035763 | 0.83255585  | 0.389319852 |
|         | 0.438297806                                        | 0.599802442 |             |             |             |             |
| YJR134C | YJR134C::SGM1::involved in carbohydrate metabolism |             |             | 1           |             |             |
|         | 0.757499289                                        | 0.737485792 | 0.83889499  | 0.788596036 | 1           | 0.753456672 |
|         | 0.862234281                                        | 0.767152946 | 1           | 0.946425961 | 0.892126021 | 0.713375561 |
|         | 0.910769711                                        | 1           | 0.907117564 | 0.713191379 | 1           | 0.702730848 |
|         | 0.753644998                                        | 0.559441888 | 1           | 0.958301973 | 1.101784317 | 0.897744501 |
|         | 0.72354756                                         | 1.175585926 | 1           | 1.195236746 | 1.60687254  | 1.386721216 |
|         | 1.525864962                                        | 1.556309458 | 1           | 1.555237287 | 1.833512847 | 1.574781977 |
|         | 1.4326898                                          | 1.924119315 | 0.882629006 |             |             |             |
| YJR136C | YJR136C::YJR136C::molecular_function unknown       |             |             | 1           | 0.853609252 |             |
|         | 0.813610621                                        | 0.894552774 | 1           | 0.740043244 | 0.768252268 |             |
|         | 0.873181405                                        | 1           | 0.943225784 | 0.792986307 | 0.810126923 | 0.948107185 |
|         | 0.991106403                                        | 1.160146002 | 1.37221158  | 1.114063653 | 1           | 1.083194458 |
|         | 1.188274956                                        | 0.794768943 | 0.862338517 | 1           | 0.944619439 | 0.966657388 |
|         | 0.883632008                                        | 0.901473627 | 0.932801192 | 1           | 0.798364939 | 1.013515361 |
|         | 0.921001104                                        | 0.881411987 | 1.301091217 | 1           | 1.072540257 | 1.0119059   |
|         | 0.971630589                                        | 0.865241436 | 1.138814661 | 1.070012531 |             |             |

YPR067W YPR067W::ISA2::Iron Sulfur Assembly -- IscA/NifA homolog 1  
1.125663651 1.478747808 1.05945663 1.803561455 1 1.105188665  
1.234247836 1.448436567 1.371662439 1 2.047199295 2.066027434  
2.045862943 1.21552749 1 1.834134849 1.460306129 1.425157903  
1.658753621 1 2.116228248 3.43357788 3.474659945 1.12305082 1  
2.122106549 2.450788195 1.375718619 0.992067004 1.042094007 1  
2.176256313 4.040545481 2.269661034 2.065701893 2.560462647 1  
2.651339847 3.808059625 1.740833746 1.730208817 2.103735184 1.473675164  
YJR150C YJR150C::DAN1::Delayed Anaerobic 1 1.372764961 1.220532683  
1.674615674 1.087367116 1 1.582401039 1.166493512 1.35552443 1  
1.619371322 1.479585001 1.675308665 1.562951814 1 0.853608445  
1.266203392 1.517700507 0.70571201 1 0.570072082 0.615173642  
0.435410007 1 1.32103062 1.371811732 1.443260099 2.323377665  
1.804012364 1 0.916441002 0.507562892 0.683464329 1.094032171 1  
0.7603034 0.57642731 0.847080869 0.379887833 0.904318969 0.370388959  
YPR069C YPR069C::SPE3::biosynthesis of spermidine 1 1.04855573  
0.861822339 0.778891945 0.852427877 1 0.851111229 0.854255476  
1.042570535 0.918451691 1 0.862918497 0.765729438 0.75434818  
0.756935719 1 1.023430575 0.975573769 0.839880808 1.455145917 1  
0.964830411 1.009556256 0.964765585 1.197640703 1 0.946904925  
1.027821315 1.320195661 1.069974295 0.928332003 1 1.065442461  
1.205093595 0.945661549 0.8797941 0.694031531 1 1.5743032  
1.584338094 1.648409315 1.286005435 1.18281269 1.246888598  
YJR152W YJR152W::DAL5::allantoate permease 1 1.292444296 1.208697235  
1 1.176493042 1.266765761 1 1.212263098  
1.143230978 1.37689778 1.475288486 1 1.105426998 0.484801401  
1.139627223 0.293370089 1 1.048068357  
1.03452549 1.009024848 0.853713864 1.241766143 0.86291685  
1.103842588 1.20311928 0.995758255 1.208375822 1 1.226760332  
1.182848834 1.121464268 0.797493249 1.367811627  
YPR071W YPR071W::YPR071W::molecular\_function unknown 1 1.054171723  
0.903465193 1.041140605 0.91254044 1 0.961740671 0.953739062  
1.102168042 1.040711355 1 1.033428614 0.945221146 0.92351335  
1.139706969 1 0.858694251 0.637722313 0.963145502 1.487855229 1  
0.916763279 1.241473398 1.163262047 1.145561358 1 1.048667457  
1.227346796 1.124717496 1.171455428 1.193325905 1 1.161034377  
1.530662501 1.139387534 1.622570008 1.187833928 1 1.044795091  
0.938111719 1.140034469 1.010209353 1.210210063 1.085773768  
YJR154W YJR154W::YJR154W::molecular\_function unknown 1 1.237063587  
0.939270777 1.850092838 1 1.587204611 1.771873119 1.348606093  
0.876647078 1 2.067963899 1.395167388 0.331898955 1.886023283 1  
0.468513049 0.571922379 1 0.486964223 0.653726311 0.62163777  
0.574981598 1 0.782141968 0.758288006 0.960676505 0.742818576  
1.066512161 0.698810478 0.481942293 0.959733683 0.700526228 1  
0.519670475 0.705659871 0.799674054 0.319958445 0.67047349 0.594548714  
YPR073C YPR073C::LTP1::Homologous to mammalian phosphotyrosine phosphatase  
1 1.3390773 1.57168054 1.265810687 2.182263457 1 1.189666639  
1.330756618 1.801215558 1.656786963 1 1.272837822 1.759103582  
1.826404623 1.45383439 1 1.245798635 0.818815712 0.85642934  
1.376080464 1 1.57629145 1.42195993 1.609588715 1.444307022 1  
1.200681013 0.702349905 0.743904087 0.989573114 1 1.283713169  
2.035371783 1.302490586 1.492868157 1.958565855 1 1.473130491  
1.964048454 1.309960342 1.91044419 2.046292631 1.239883592  
YJR156C "YJR156C::THI11::thiamine regulated gene, homologous to S. pombe  
NMT1A. Proposed biosynthetic enzyme involved in pyrimidine biosynth. pathway  
above the hydroxymethyl-pyrimidine precursor leading to the thiamine moiety.  
Three copies THI5, THI11 & THI12" 0.837275169 0.79831139 0.831900644

|             |                                      |             |             |                           |
|-------------|--------------------------------------|-------------|-------------|---------------------------|
| 0.947641987 | 0.687693527                          | 0.693079023 | 1.003611063 |                           |
| 0.815007231 | 0.813384366                          | 1.438504684 | 1.550718568 | 1 0.90190844              |
| 0.720660141 | 1.6682876                            | 1           | 0.849390897 | 1.721318668 1.618853348   |
| 1.58015231  | 1                                    | 0.910844265 | 0.862418519 | 1.312488352 1.119922859 1 |
| 0.823715969 | 1.401599943                          | 1.921379191 | 2.386078042 | 2.101112189 1             |
| 1.32953316  | 1.686862365                          | 1.761038388 | 1.203983    |                           |
| YPR075C     | YPR075C::OPY2::imparts Far-          | phenotype   | 1           | 0.934627065               |
| 0.999674403 | 1.125995417                          | 0.956080189 | 1           | 1.020240323 0.97050099    |
| 1.147670748 | 1                                    | 1.101849073 | 1.086244106 | 1.379928714 1.263018934 1 |
| 1.222210817 | 0.741952415                          | 0.97874167  | 1.24015702  | 1 1.334374136             |
| 0.815239877 | 0.786175201                          | 1.059219139 | 1           | 1.10341287 1.251450634    |
| 1.36946347  | 1.328495667                          | 1.123670846 | 1           | 0.917051828 0.844396045   |
| 1.071502518 | 1.153287112                          | 0.484357734 | 1           | 1.084913094 0.956841413   |
| 1.013675918 | 0.903978135                          | 0.812542888 | 0.789812857 |                           |
| YJR158W     | YJR158W::HXT16::hexose transporter   | 1           | 0.979411042 | 1.08969009                |
| 0.911784902 | 1                                    | 1.082636234 | 1.034667757 | 1.001357005 1             |
| 1.266295153 | 1.105321128                          | 1.150421131 | 1.462836436 | 1 0.848169386             |
| 1.551188537 | 1.116180128                          | 1           | 0.624984977 | 0.922949292 1             |
| 0.875227612 | 0.879848696                          | 0.962255266 | 1           | 0.695006899 0.628477016   |
| 0.925587634 | 0.810258317                          | 1           | 0.935663872 | 0.898951661 1.116835722   |
| 0.024162495 | 1.493660265                          | 0.711882332 |             |                           |
| YPR089W     | YPR089W::YPR089W::molecular_function | unknown     | 1           | 0.932314764               |
| 0.897170775 | 1.183851662                          | 1.041946589 | 1           | 1.121218502 1.146618769   |
| 1.117599794 | 1.034751428                          | 1           | 0.950926218 | 0.794019432 0.494460047   |
| 1.129177116 | 1                                    | 0.45705195  | 0.949488315 | 0.811328122 1             |
| 0.691938413 | 0.864170709                          | 1.288856082 | 0.925207263 | 1 1.084749446             |
| 0.714213172 | 0.930288554                          | 1.111434558 | 1.097783705 | 1 0.977102615             |
| 0.680491487 | 0.504726345                          | 0.905898947 | 0.655711637 | 1 0.678322205             |
| 0.58488353  | 0.936428327                          | 0.450638439 | 0.829324576 |                           |
| YPR091C     | YPR091C::YPR091C::molecular_function | unknown     | 1           | 0.7835298                 |
| 0.892579291 | 1.046809547                          | 0.900203857 | 1           | 1.021548296 0.843151365   |
| 0.77091035  | 1                                    | 1.13976021  | 1.154981531 | 0.668671534 0.893698884 1 |
| 1.753556436 | 1.069538423                          | 1.699787603 | 0.986427432 | 1 1.369133385             |
| 1.335305685 | 0.943121984                          | 0.764877149 | 1           | 1.114248833 1.347476415   |
| 1.292269718 | 1.238233549                          | 0.920252593 | 1           | 0.963087851 0.847598782   |
| 1.010987726 | 0.75191051                           | 0.577276059 | 1           | 1.013498407 0.98928511    |
| 0.865288459 | 0.877527608                          | 0.947467729 | 0.719762951 |                           |
| YPR093C     | YPR093C::YPR093C::molecular_function | unknown     | 1           | 0.789552787               |
| 0.994181729 | 0.93762268                           | 1           | 0.879306672 | 1.091371746 1.286962676 1 |
| 1.043563889 | 1.279578494                          | 1.24130793  | 1.125170179 | 1 1.28733815              |
| 1.158405913 | 1.457884961                          | 1.964787934 | 1           | 2.008166195 4.732728795   |
| 2.793907544 | 1.039614649                          | 1           | 1.000620107 | 1.350451842 1.390798637   |
| 1.197042825 | 1.02614902                           | 1           | 1.14888102  | 1.337558028 1.623960682   |
| 1.892729799 | 1.363752275                          | 1           | 1.209215498 | 1.270330903 1.427850109   |
| 1.150599242 | 1.305735318                          |             |             |                           |
| YPR095C     | YPR095C::SYT1::Suppressor of Ypt3    | 1           | 1.180456185 | 0.974244793               |
| 1.447733581 | 0.95898127                           | 1           | 1.084958329 | 1.44023731 0.985086356    |
| 0.879000815 | 1                                    | 1.038023389 | 1.033798281 | 0.781532206 1.240680507 1 |
| 1.253551804 |                                      | 1.163143327 | 0.456353452 |                           |
| 0.93076907  | 0.90946823                           | 1.068451353 | 1.062721574 | 0.820975962 1             |
| 0.954343416 | 1.032473623                          | 0.854558631 | 0.931197672 | 0.892594337 1             |
| 0.907823723 | 1.142944099                          | 1.032112924 | 1.291105201 | 0.902255759               |
| YPR097W     | YPR097W::YPR097W::molecular_function | unknown     | 1           | 0.741517276               |
| 0.76118631  | 0.954371283                          | 0.769344589 | 1           | 0.869562258 0.89748676    |
| 0.794986598 | 0.69274788                           | 1           | 0.777160673 | 0.776182044 0.519554825   |
| 0.931675621 | 1                                    | 0.712474864 | 0.691962968 | 1 0.729402924             |
| 0.952933575 | 0.676806948                          | 0.753777146 | 1           | 0.988984325 1.06806645    |

|         |                                                                                                                                                                                                |             |             |             |             |             |             |
|---------|------------------------------------------------------------------------------------------------------------------------------------------------------------------------------------------------|-------------|-------------|-------------|-------------|-------------|-------------|
|         | 1.032980552                                                                                                                                                                                    | 1.032257922 | 1.00258408  | 1           | 1.129971419 | 0.803342337 |             |
|         | 0.980184236                                                                                                                                                                                    | 0.804640767 | 0.648964394 | 1           | 1.149187171 | 1.161496579 |             |
|         | 1.147586369                                                                                                                                                                                    | 0.911967287 | 1.008345999 | 0.791564082 |             |             |             |
| YLR250W | YLR250W::SSP120::secretory_protein                                                                                                                                                             | 1           |             | 0.990170396 | 1.404133814 |             |             |
|         | 1.026517337                                                                                                                                                                                    | 1.672244684 | 1           | 1.038319538 | 1.241549563 | 1.680236674 |             |
|         | 1.992787815                                                                                                                                                                                    | 1           | 1.325488967 | 1.606008546 | 1.432597917 | 1.171283357 | 1           |
|         | 1.500931529                                                                                                                                                                                    |             | 1.143289864 | 1.30301283  | 1           | 3.50539482  |             |
|         | 3.432999044                                                                                                                                                                                    | 1.998698075 | 1           | 1.149664842 | 1.731516656 | 1.293312939 |             |
|         | 0.922683729                                                                                                                                                                                    | 0.988349187 | 1           | 1.233847068 | 2.169377901 | 1.939990201 |             |
|         | 1.53783504                                                                                                                                                                                     | 1.689244286 | 1           | 1.68308101  | 1.9091221   | 1.384688801 |             |
|         | 1.525195582                                                                                                                                                                                    | 1.570876258 | 1.566491366 |             |             |             |             |
| YLR252W | YLR252W::YLR252W::molecular_function_unknown                                                                                                                                                   | 1           |             | 1.427164907 |             |             |             |
|         | 1.447956839                                                                                                                                                                                    | 1.872367586 | 1           | 1.460805498 | 1.789450235 | 1.752441757 | 1           |
|         | 1.653086017                                                                                                                                                                                    | 2.358328883 | 2.064177192 | 2.031630865 |             | 0.32481989  |             |
|         | 0.494564532                                                                                                                                                                                    | 0.342138096 | 0.422216808 | 1           | 7.605122849 |             | 1           |
|         | 1.281529792                                                                                                                                                                                    | 1.866453729 | 1.125560078 |             | 1.073419599 | 1           | 1.212468565 |
|         | 1.529624417                                                                                                                                                                                    | 1.707761743 | 0.951068521 | 1.538225138 |             | 1.010149362 |             |
|         | 0.721542143                                                                                                                                                                                    |             | 1.85875787  | 1.661934354 |             |             |             |
| YLR254C | YLR254C::YLR254C::molecular_function_unknown                                                                                                                                                   |             |             | 0.733847071 |             |             |             |
|         | 1.085293564                                                                                                                                                                                    | 1.14441479  |             | 0.885042176 | 0.760080313 | 1.225606516 |             |
|         | 1.080430646                                                                                                                                                                                    |             | 0.911457771 | 1.03444721  | 0.857727476 | 0.743052654 | 1           |
|         | 0.86346863                                                                                                                                                                                     |             | 1.083558186 | 1           | 1.879615218 | 2.34436373  |             |
|         | 3.16563666                                                                                                                                                                                     | 1.766468487 | 1           | 1.140265703 | 1.245746491 | 0.705078645 |             |
|         | 1.28059257                                                                                                                                                                                     | 1           | 1.407078524 | 1.851155947 | 1.787701508 | 2.147652885 |             |
|         | 5.256508036                                                                                                                                                                                    | 1           |             | 1.149643438 | 1.139143824 | 2.049178653 |             |
|         | 1.193475543                                                                                                                                                                                    |             |             |             |             |             |             |
| YLR256W | YLR256W::HAP1::Activator of CYC1 and CYP3 transcription; positive regulator of cytochrome C genes CYC1 and CYC7                                                                                | 1           |             | 1.103487525 | 0.898521595 |             |             |
|         | 0.868187473                                                                                                                                                                                    | 1           | 1.135471845 | 1.023249202 |             | 0.793159488 | 1           |
|         | 1.148261629                                                                                                                                                                                    | 1.229780587 | 0.821035637 | 1.077104395 | 1           | 1.152723876 |             |
|         | 1.080725918                                                                                                                                                                                    | 1.254543962 | 0.80265427  | 1           |             | 0.921705286 | 0.778121626 |
|         | 1                                                                                                                                                                                              | 0.87775882  | 0.849256769 | 0.938108705 | 0.629499556 | 1.075523092 | 1           |
|         | 1.091045272                                                                                                                                                                                    | 1.303115097 | 1.402688487 | 1.407440977 | 1.080126277 | 1           |             |
|         | 0.916103041                                                                                                                                                                                    | 1.496981399 | 1.365883095 | 0.93262037  | 0.916701009 | 1.072639421 |             |
| YLR258W | YLR258W::GSY2::Highly similar to GSY1. GSY2 is the predominantly expressed glycogen synthase. Activity is probably regulated by cAMP-dependent and SNF1 protein kinases and type 1 phosphatase | 1           |             | 1.24428063  | 1.222762982 |             |             |
|         | 1.519149105                                                                                                                                                                                    | 1.038764879 | 1           | 1.859047274 | 1.930119772 |             | 0.916468571 |
|         | 1.768306616                                                                                                                                                                                    | 2.241676617 | 1.725422819 | 1.191306288 | 1           | 5.38959236  |             |
|         | 5.633964732                                                                                                                                                                                    | 5.682761457 | 1.501118197 | 1           | 2.685458015 | 0.848914759 |             |
|         | 1.302659225                                                                                                                                                                                    | 1.283420964 | 1           | 1.071731058 | 1.494897429 | 2.104073305 |             |
|         | 0.929704707                                                                                                                                                                                    | 1.013564978 | 1           | 1.471196589 | 1.295240693 |             | 1.10839405  |
|         | 0.557822416                                                                                                                                                                                    | 1           | 1.093717034 | 1.188637491 | 1.298555711 | 0.62527211  |             |
|         | 1.517989675                                                                                                                                                                                    | 0.810827823 |             |             |             |             |             |
| YLL051C | YLL051C::FRE6::similar to FRE2                                                                                                                                                                 | 1           |             | 0.72004275  | 0.511054514 |             |             |
|         | 0.51894779                                                                                                                                                                                     | 1           | 0.635859776 | 0.622297025 |             | 0.587300075 | 1           |
|         | 1.928292775                                                                                                                                                                                    | 1.214090598 | 0.365444185 | 0.895134615 |             |             |             |
|         | 1.194255675                                                                                                                                                                                    | 1.115367475 | 1           | 2.011032414 | 1.249571399 | 0.98334854  |             |
|         | 0.909329109                                                                                                                                                                                    | 1           | 2.356995972 | 1.904818229 | 2.07500563  | 1.366394656 |             |
|         | 1.089505879                                                                                                                                                                                    | 1           | 2.138869466 | 1.502582155 | 1.931868687 | 1.514673855 |             |
|         | 0.484266431                                                                                                                                                                                    | 1           | 2.200873697 | 1.689562406 | 1.076858246 | 0.337637937 |             |
|         | 0.71610329                                                                                                                                                                                     | 1.007843244 |             |             |             |             |             |
| YLL053C | YLL053C::YLL053C::molecular_function_unknown                                                                                                                                                   | 1           |             | 1.265637269 |             |             |             |
|         | 0.999782882                                                                                                                                                                                    | 0.728958768 | 0.967125247 | 1           | 0.749022075 | 1.078426573 |             |
|         | 1.267397662                                                                                                                                                                                    | 1           | 1.828761976 | 1.051266255 | 1.274778789 | 1.001406242 | 1           |
|         | 1.856494005                                                                                                                                                                                    | 1.38260868  | 1.001996834 | 1.89968223  | 1           | 3.209495767 |             |
|         | 3.147443067                                                                                                                                                                                    | 1.363223746 | 1.223240205 | 1           | 1.618371743 | 1.133826479 |             |



1.345979451 1.251811661 1.104720764 1 1.145852854 1.231602992  
0.824167557 1.131292392 0.969366386 1 1.958523993 2.045148275  
1.157232837 1.542335517 0.944626877 1.415883994  
YJR160C "YJR160C::MPH3::Maltose Permease Homologue. Maltose transporter  
family member, able to transport hexoses. Capable of transporting maltose,  
maltotriose, alpha-methylglucoside and turanose."  
0.835255039 0.783660771  
1 1  
0.885615095 0.971150487 0.881558417 0.991098185 1 1.016548506  
0.920503327 1.127293967 0.915787864 0.946286308 1 0.778090689  
0.920832421 0.791882954 0.671395963 0.692748797  
YLL055W YLL055W::YLL055W::molecular\_function unknown 1 1.327474533  
1.173072468 1.096813136 0.732796448 1 1.088885145 1.084789009  
1.320591189 1 5.145383201 3.530934553 1.989655237 1.12437331 1  
7.735032272 2.315624563 1.030477687 1 5.394492806 2.012511509  
0.966030667 1.411699728 1 1.28229854 1.856759633 1.747206435  
1.04673341 1.186435895 1 1.460945164 1.072289707 1.4633087  
1.1812536 0.81749305 1 1.882903659 1.11042949 0.935702728  
0.746525649 0.971974601 0.777554122  
YLL057C YLL057C::YLL057C::molecular\_function unknown 1 1.192735231  
1.016011698 1.035478645 0.860123835 1 0.912453907 0.926736593  
0.876169326 1 0.98335791 0.963123746 1.118394271 0.960665105 1  
0.988063257 1.104471156 1.545438757 0.954180329 0.287549242  
0.23590807 1 0.90986528 0.805655771 0.912615215 1.214138428  
0.959342678 1 0.806696478 0.650607529 0.679322179 0.810690829  
0.885305182 1 0.695084423 0.623977541 0.773908203 0.806232945  
1.228197343 0.926410164  
YKL011C YKL011C::CCE1::cruciform cutting endonuclease 0.911152392  
1.088709974 0.845318356 1.116024646 0.813609205 0.760080313  
1.074235522 0.84997054 0.869443402 1.107800584 1.150312028 1  
0.767900286 0.656891617 0.919987781 1 1.144992931 1.339502109  
0.869482668 1 0.995426771 0.789467269 0.768254449 1.130302881 1  
0.903170164 1.205040718 1.093830091 1.161754274 1.487158199 1  
0.96939617 1.225172145 0.956803133 0.69940896 1.480187116 1.339704695  
YLL059C YLL059C::YLL059C::molecular\_function unknown  
0.919357272 2.100210924  
1 0.898470788 1.532593475 1.156206217 1 1.174440674  
1.61239301 1.08601058 1 1.096793692 1.300726126 1.685487615  
1.185030413 1.29567748 1 0.81794898 1.597745783 1  
1.414716424 1.51110339 1.116108122 0.977196433  
YKL013C YKL013C::ARC19::Arp complex subunit 1 1.317280179 1.76874208  
1.194564365 1.728477635 1 1.168474193 1.272058835 1.64550893  
1.538761602 1 1.484661498 1.81054101 2.554561066 1.297849577 1  
1.473523224 1.316007222 1.177126166 1.102318595 1 2.250415326  
2.085238823 2.377449411 1.376848201 1 1.195662414 1.42336506  
1.04330699 0.816695893 1.013026404 1 1.143882071 1.990049531  
1.649982334 1.084564963 1.448832976 1 1.573164648 1.843707963  
1.087890552 1.090120793 1.675626917 1.366849055  
YKL015W YKL015W::PUT3::Positive regulator of PUT (proline utilization) genes  
1 0.862255427 0.73019698 0.701411264 1 0.866481676  
1.076857081 0.802364057 0.740282184 1 1.252281458 0.957352399  
0.56289937 1 1.185547304 0.877028861 0.469458009 1  
1.588216014 2.17403666 1.273651606 1.6612586 1 0.940732646  
0.927962999 0.971038031 0.811157456 1.048436907 1 1.392095618  
1.068389543 0.992162595 1.128368914 0.662235621 1 0.997852928  
0.957199974 1.231013724 0.799444563 0.963273811 0.633951756

|         |                                                                                                                   |             |             |             |
|---------|-------------------------------------------------------------------------------------------------------------------|-------------|-------------|-------------|
| YKL017C | YKL017C::HCS1::DNA helicase                                                                                       | 1           | 0.888989218 | 0.819948993 |
|         | 0.979495882                                                                                                       | 0.852681991 | 0.937103459 | 0.898476496 |
|         | 0.755805878                                                                                                       | 1.021170307 | 0.875789686 | 0.595968649 |
|         | 1.306622606                                                                                                       | 1.27658867  | 0.864326727 | 1           |
|         | 1.246812911                                                                                                       | 1           | 1.00151787  | 1.068358409 |
|         | 1.239788409                                                                                                       | 1           | 0.953676542 | 1.026983806 |
|         | 0.665810907                                                                                                       | 1           | 1.214052298 | 1.123662874 |
|         | 1.382649098                                                                                                       | 0.802947204 |             | 1.326875952 |
|         |                                                                                                                   |             |             | 1.100113345 |
| YPR099C | YPR099C::YPR099C::molecular_function unknown                                                                      | 1           | 1.048267586 |             |
|         | 1.655027336                                                                                                       | 1.242537409 | 2.264948737 | 1           |
|         | 1.755372728                                                                                                       | 1.800658139 | 1           | 1.240714928 |
|         | 1.38326998                                                                                                        | 1           | 1.462727084 | 1.233147472 |
|         | 1.669246402                                                                                                       | 2.101119618 | 1.885019869 | 1.130651989 |
|         | 0.967248176                                                                                                       | 0.515887564 | 0.538974531 | 0.813574846 |
|         | 1.507237156                                                                                                       | 0.890863302 | 1.101466601 | 2.26276121  |
|         | 1.591472444                                                                                                       | 1.109349877 | 2.072851254 | 1.793767055 |
|         |                                                                                                                   |             |             | 0.972818213 |
| YKL019W | YKL019W::RAM2::CAAX farnesyltransferase alpha subunit                                                             | 1           |             |             |
|         | 1.267963984                                                                                                       | 1.134018    | 1.095781126 | 0.941555437 |
|         | 0.989712555                                                                                                       | 1.15255312  | 1           | 1.257649784 |
|         | 1.180534883                                                                                                       | 1           | 1.29948409  | 0.315242493 |
|         | 1.245281324                                                                                                       | 1.453475214 | 1.19335143  | 0.966732454 |
|         | 0.721680986                                                                                                       | 1.021159343 | 1.280116326 | 0.801587027 |
|         | 0.990707218                                                                                                       | 1.160271162 | 0.867999518 | 0.813981854 |
|         | 0.734481645                                                                                                       | 0.786325457 | 0.877452763 | 0.648324842 |
|         |                                                                                                                   |             |             | 0.985077    |
| YPR113W | YPR113W::PIS1::phosphatidylinositol synthase                                                                      | 1           | 1.179876421 |             |
|         | 0.980241082                                                                                                       | 0.714961042 | 1.265695521 | 1           |
|         | 0.907729401                                                                                                       | 0.926109797 | 1           | 0.907503018 |
|         | 0.829769766                                                                                                       | 1           | 1.520400833 | 0.72397112  |
|         | 1.274616998                                                                                                       | 1.130646667 | 1.025671382 | 1.01953924  |
|         | 1.071463507                                                                                                       | 0.926607521 | 1.481452598 | 0.908925066 |
|         | 0.903192351                                                                                                       | 0.734634287 | 0.607057178 | 1.132203482 |
|         | 1.199585471                                                                                                       | 1.04516962  | 1.763013809 | 1.768838384 |
|         |                                                                                                                   |             |             | 1.182967981 |
| YKL021C | YKL021C::MAK11::essential for cell growth and replication of M dsRNA virus; contains four beta-transducin repeats | 1           | 1.01731992  | 0.923166562 |
|         | 1.112166734                                                                                                       | 1           | 0.819848854 | 0.727720705 |
|         | 0.748267052                                                                                                       | 0.600814562 | 0.495273296 | 1.095974038 |
|         | 0.296825136                                                                                                       | 0.549198494 | 1           | 1.191454188 |
|         | 0.918013688                                                                                                       | 1           | 0.828806212 | 0.680114244 |
|         | 0.841634058                                                                                                       | 1           | 0.8826254   | 0.763282137 |
|         | 1.212802904                                                                                                       | 1           | 0.833233537 | 0.715783784 |
|         | 0.524669517                                                                                                       | 0.933415171 |             | 0.8459867   |
|         |                                                                                                                   |             |             | 1.11715702  |
| YPR115W | YPR115W::YPR115W::molecular_function unknown                                                                      | 1           | 1.303493522 |             |
|         | 1.327282738                                                                                                       | 1.683614168 | 1.202915091 | 1           |
|         | 1.171694978                                                                                                       | 0.949361313 | 1           | 1.532278769 |
|         | 1.369479355                                                                                                       | 1           | 1.266474538 | 1.047642343 |
|         | 1.024562467                                                                                                       | 0.823633049 | 0.76678682  | 0.941597528 |
|         | 1.05767734                                                                                                        | 1.366503889 | 1.04952586  | 1.104993964 |
|         | 1.211177522                                                                                                       | 1           | 1.417792353 | 0.570649865 |
|         | 1.280222452                                                                                                       | 0.993070374 |             | 1           |
|         |                                                                                                                   |             |             | 1.248110027 |
|         |                                                                                                                   |             |             | 1.311308919 |
| YKL035W | YKL035W::UGP1::EC:2.7.7.9<br>UDP-glucose pyrophosphorylase or UTP-glucose-1-phosphate uridylyltransferase         | 1           | 1.04024254  | 1.139561192 |
|         | 1.380850152                                                                                                       | 0.707306261 | 1           | 1.428110136 |
|         | 0.930948512                                                                                                       | 1           | 1.241206008 | 1.66024674  |
|         | 2.102454622                                                                                                       | 1.440664877 | 2.786312571 | 1.511334529 |
|         | 1.054849581                                                                                                       | 2.353723187 | 2.18039785  | 1           |
|         | 1.47114623                                                                                                        | 1.356774794 | 1.184088484 | 1           |
|         |                                                                                                                   |             |             | 1.00390664  |
|         |                                                                                                                   |             |             | 0.632297182 |

1.132775455 0.635266006 0.597768561 1 1.310120057 0.715918181  
0.941164286 0.768483493 1.880897244 0.781056625  
YPR117W YPR117W::YPR117W::molecular\_function unknown 1 1.423909403  
1.405208624 1.657245536 1.479058409 1 1.334826574  
1.36708268 1 1.271423221 1.277819776 1.42850204 1.264178311  
0.401637614 1 1.210085721  
1.183426867 1.381548968 0.971306258 1.039066736 1 1.170925529  
1.4123635 0.679013514 1.701618998 1 1.09229411  
0.935479616 1.09162321 1.125147793 3.099708927  
YKL037W YKL037W::YKL037W::molecular\_function unknown 1 1.4544588  
1.328005281 1.154927206 1 1.433835832 1.461931966  
1.34366395 1 1.513505263 1.678170445 2.029019497 1.35188475  
0.535161689 0.369078015 0.767120977 0.289877581 0.721251234  
0.296827796 0.254389353 1 1.006923364 0.83155024 0.747757872  
1.248437252 1.007297476 1 0.790093379 0.778956798 0.707406745  
1.055138758 0.957150703 1 0.912253593 0.673016848 0.943879485  
0.764082533 0.907341041 0.851982143  
YPR119W YPR119W::CLB2::Involved in mitotic induction 1 0.618202584  
0.539266902 0.715984517 0.544123204 1 0.737317559 0.689188642  
0.508017844 0.472287661 1 0.507471508 0.531648868 0.234815501  
0.525503348 1 0.428341777 0.390345215 0.485453258 0.320695408 1  
0.5510682 0.885551534 0.852608254 0.375680462 1 0.996203567  
0.833733061 1.02150044 1.259724351 0.986716739 1 0.652772563  
0.413984989 0.366123744 0.595638105 0.48873011 1 1.097482197 1.559789  
1.409253381 0.726111517 1.283699068 0.682111082  
YKL039W YKL039W::PTM1::Putative membrane protein 1 1.171465517  
0.965474233 1.291152521 0.796139807 1 1.221210839 1.325784902  
0.974223913 0.961161044 1 1.436201018 1.398838191 1.054126223  
0.981668196 1 1.560522973 2.073565543 2.502249138 0.636651804 1  
1.035697011 0.536725453 0.451335204 0.574200444 1.01686352  
0.992192231 1.161874876 0.988946082 0.992276207 1 1.23164023  
0.92699581 1.152494026 0.900855305 0.412711034 1 0.981419008  
0.745556711 0.797229619 0.467397466 0.738280123 0.577036198  
YPR121W YPR121W::THI22::THI for thiamine metabolism. Transcribed in the  
presence of low level of thiamine (10-8M) and turned off in the presence of high  
level (10-6M) of thiamine. Under the positive control of THI2 and THI3. 1  
0.89869956 0.846715291 1.149063699 0.712758615 1 0.995804232  
0.939298161 1.005575743 0.9212203 1 0.878879779 0.966936862  
0.710766965 1.168699233 1 1.042761767 0.913893849 1.235519519  
1.56250126 1 1.07123634 1.625804721 1.64152065 1.047613257 1  
1.1058059 0.913443945 1.092528479 1.070241545 1.06113144 1  
0.868815013 0.981079889 0.816165709 0.853404441 0.901572809 1  
0.874065704 0.926595518 1.070613305 1.142818647 0.75216104  
YPR123C YPR123C::YPR123C::molecular\_function unknown 1 0.980709837  
1.172958114 1.292729809 1.762250654 1 1.19458959 1.172674027  
1.312308518 1.861761997 1 0.994328145 1.424020929 1.652471726  
4.037037653 1 0.787830105 0.479621121 1.608261399 3.008152631 1  
1.833335001 2.745732257 2.631787548 5.320036944 1 1.652358069  
1.376280576 1.701324578 1.126396107 1.128396114 1 1.910210042  
1.275958628 1.332754082 1.029624958 0.301659113 1 1.404223781  
0.948805404 0.93190356 0.503787424 0.842938799 2.541060805  
YPR137W "YPR137W::RRP9::part of small (ribosomal) subunit (SSU) processosome  
(contains U3 snoRNA); Rrp9p is an ortholog of the human U3-55k protein; the  
human cDNA partially complements a yeast rrp9 null mutant. (Pluk et al. (1998)  
Mol. Cell. Biol. 18, 488-498.)" 1 1.29784773 1.151488197 1.173624564  
1.32899308 1 1.32994882 1.411424215 1.339022077 1  
1.549240792 1.370130657 1.389163051 1.563808976 1 1.485081585

|             |                                                                                |             |             |             |             |
|-------------|--------------------------------------------------------------------------------|-------------|-------------|-------------|-------------|
| 1.345251764 | 1.187659583                                                                    | 1.064544266 | 1           | 1.09762835  | 0.728755831 |
| 1.177891243 | 1.007576201                                                                    | 0.538675195 |             | 0.705947585 | 1.1265135   |
| 1.057784467 | 0.866926049                                                                    | 1           | 1.250240392 | 1.559330335 | 1.179086468 |
| 1.567074154 | 1.665821662                                                                    | 1           | 0.723061529 | 0.756680773 | 0.610058013 |
| 0.974595032 | 0.612720555                                                                    | 1.594511286 |             |             |             |
| YPR139C     | YPR139C::VPS66                                                                 | 1           | 0.847142988 | 0.985969581 | 0.864925677 |
| 1.352733378 | 1                                                                              | 0.866736834 | 0.84541571  | 1.050382933 | 1.09653991  |
| 0.76345696  | 0.839525535                                                                    | 0.949965884 | 1.015981912 | 1           | 1.066419655 |
| 0.847577074 | 0.937330501                                                                    | 1.12129248  | 1           | 1.118886685 | 1.316892726 |
| 1.348274706 | 0.886747583                                                                    | 1           | 0.969834131 | 1.019295883 | 0.905137071 |
| 0.748288788 | 1.132065492                                                                    | 1           | 0.902831272 | 1.103165861 | 1.015743576 |
| 1.296900922 | 1.116599694                                                                    | 1           | 0.73612032  | 0.761884247 | 0.670746767 |
| 1.076979557 | 0.546165485                                                                    | 1.036738829 |             |             |             |
| YPR141C     | YPR141C::KAR3::kinesin-like nuclear fusion protein                             | 1           |             |             |             |
| 0.67243145  | 0.75358207                                                                     | 0.973462679 | 1.074734083 | 1           | 0.909275787 |
| 0.893206184 | 0.802825318                                                                    | 0.851502309 | 1           | 0.625740004 | 0.701602245 |
| 0.546876809 | 1.036511251                                                                    | 1           | 0.717320377 | 0.591058109 | 0.739657092 |
| 0.877337266 |                                                                                | 1.025668327 | 1           | 0.751634885 | 0.953747681 |
| 0.670366714 | 0.590896325                                                                    | 1.014271039 | 1           | 1.132671986 | 0.984758249 |
| 0.903199687 | 1.804246768                                                                    | 0.947513183 | 1           | 1.068468497 | 1.039160211 |
| 1.180284673 | 1.023540283                                                                    | 0.922907714 |             |             |             |
| YLL061W     | YLL061W::MMP1::S-MethylMethionine Permease                                     | 1           |             |             | 1.575215604 |
| 0.90575923  | 0.670900313                                                                    | 0.323094411 | 1           | 0.749747808 | 0.69170556  |
| 0.478237988 | 0.45660599                                                                     | 1           | 1.279470431 | 0.994211096 | 0.442905092 |
| 0.360206252 | 1                                                                              | 1.861787765 | 0.457528211 | 0.616341065 | 0.667131596 |
| 1.434890987 | 0.463836786                                                                    | 0.463061256 | 0.860012189 | 1           | 0.994607974 |
| 0.682152175 |                                                                                | 1.45341436  | 1.017445257 | 1           | 1.710129683 |
| 0.342039136 | 0.6104036                                                                      | 1.135533682 | 1           | 1.817385806 | 0.687158087 |
| 0.734685384 | 0.671547685                                                                    | 0.523337105 | 0.751285375 |             |             |
| YLR008C     | YLR008C::molecular_function unknown                                            | 1           |             |             | 1.21018419  |
| 1.212051005 | 1.078916588                                                                    | 1.406798356 | 1           | 0.962678407 | 1.073492086 |
| 1.885732887 | 1.554735348                                                                    | 1           | 0.978597883 | 0.911100453 | 1.114662687 |
| 1.146003222 | 1                                                                              | 0.717460347 | 0.60288395  | 0.590272454 | 0.870904291 |
| 1.12097531  | 1.089880724                                                                    | 1.283726789 | 1.05958349  | 1           | 1.055526063 |
| 1.117021172 |                                                                                | 0.967512728 | 1.080829761 | 1           | 1.037601707 |
| 1.060836874 | 0.914941393                                                                    | 1.85732295  | 1           | 0.778085002 | 1.150374314 |
| 0.848571299 | 1.081869231                                                                    | 1.021405757 | 1.062131964 |             |             |
| YLR010C     | YLR010C::TEN1::protein involved in Telomeric pathways in association with Stn1 | 1           |             |             |             |
| 0.716825461 |                                                                                | 1.328434792 | 1           | 0.924512189 | 0.910931924 |
| 1.722767789 | 1                                                                              | 0.687104005 |             | 1.100470132 | 1.341468625 |
| 3.183926589 |                                                                                | 1.969212488 | 1           | 1.074998164 | 1.128225989 |
| 1           | 0.788160796                                                                    | 0.95643057  |             | 1.14993093  | 1.637026784 |
| 1.055150705 | 1.082502892                                                                    | 1.073644278 | 0.193212447 | 1.276359564 | 1.165455518 |
| YLR012C     | YLR012C::molecular_function unknown                                            |             |             |             | 1.088457712 |
| 1.08301589  |                                                                                | 0.620666349 |             | 0.877777829 | 0.905066769 |
| 1.11512337  |                                                                                |             | 1.217432291 | 0.950044185 | 0.273630504 |
|             |                                                                                |             |             | 0.295700464 | 0.63682367  |
| 0.674653915 |                                                                                |             | 1           |             | 1           |
|             | 1.638137868                                                                    |             |             |             |             |
| YLR014c     | YLR014c::PPR1::Positive regulator of URA1 and URA3                             |             |             |             |             |
| 1.103233186 | 0.904221526                                                                    | 1.383146589 | 1.051412707 |             | 1.124766336 |
| 1.182957438 | 1.240181266                                                                    | 1.152294189 |             | 0.787277693 | 0.748863641 |
| 0.671925436 | 1.678966168                                                                    | 1           | 0.403404479 |             | 0.784359914 |
|             | 0.786595969                                                                    | 1           | 0.818682997 | 0.709094179 | 0.978976437 |
| 1.144397475 | 1.057634244                                                                    | 1           | 0.776114417 | 0.708881323 | 0.546927341 |

0.962917329 0.649665416 1 0.634352153 0.882183717 -0.045275982  
 0.597008855 0.713633558  
 YLR016C YLR016C::YLR016C::molecular\_function unknown 1 0.793627687  
 0.824700542 0.926079118 1 0.717257673 0.801664626  
 1.371740166 1 0.859371984 0.847178269 1.071095816 1.094985578 1  
 0.719387918 0.59866997 0.923493146 1 2.131139378  
 2.133585397 1.715337585 1 0.916354482 1.136426826 1.236208352  
 1.074766982 1 1.023710357 1.018598652 1.232641046 1.327301944  
 0.946746499 1 1.075712563 1.004974699 1.244371031 0.931010424  
 1.079578217 0.973693878  
 YLR018C YLR018C::POM34::nuclear pore integral membrane protein 1  
 0.848736255 0.703724144 0.749155043 0.88851535 1 0.705466464  
 0.629860599 0.819874006 0.867594478 1 0.800684771 0.651832295  
 0.664220414 1.058678234 1 0.724114169 0.950922488 0.685127419  
 0.807158141 1 0.95506736 0.73591392 1.108887601 1  
 1.168870083 1.096662739 1.128570784 1.134600929 1.044799771 1  
 0.883676479 1.00063941 0.933544221 0.919926259 1.218005407 1  
 0.963407796 1.141325284 1.212392483 1.281246343 0.960800312 1.030609488  
 YLR032w YLR032w::RAD5::putative ATPase/DNA helicase 1 0.869515868  
 0.771933142 0.701127374 1 0.815629205 0.884637507  
 0.718992654 1 0.756910554 0.694031246 0.520270609 1  
 1.043732453 0.879529166 1  
 0.90541377 0.879843188 1.095123371 1.102358947 1 0.702176559  
 0.577747947 0.757157915 0.950656738 0.632642111 1 1.038897576  
 0.971296197 1.34715608 0.862965592 0.934687315 0.98245011  
 YKL041W YKL041W::VPS24::involved in secretion 0.821268424  
 1.007853919 0.939810219 0.711908063 0.633766438 0.975185282  
 1.046977005 1.427468306 1.342242929 1.548350006 1.089614792 1  
 1.272377391 0.954581988 1.165072632 1.235201787 1 2.553829813  
 2.620015037 2.640525994 1.692967801 1.37407824 1.437666395  
 0.843512855 1.095618422 1 1.403607611 1.512800217 1.313001059  
 1.385875359 2.02546451 1 1.295234915 1.644827603 1.3247042  
 1.139219956 1.373262909 1.457913927  
 YLR034C "YLR034C::SMF3::Putative metal transporter, Nramp homolog, homolog  
 of SMF1 and SMF2" 1 1.264812285 0.837864618 0.985021786 1.058274706 1  
 0.89858485 0.923897049 0.718295727 1.007547714 1 2.323893398  
 1.394836664 0.798160777 1.281538949 1 1.81461568 1.261726773  
 0.956602824 1 1.384044291 0.717403208 1.066558874 1 1.827261  
 1.138567061 1.738530424 1.459521253 1.02577819 1 2.186505653  
 1.021344285 1.692419552 1.157630588 0.438142586 1 2.099210976  
 1.108190022 0.771653504 0.661161215 0.801994156 0.958808305  
 YKL043W YKL043W::PHD1::protein similar to StuA of Aspergillus nidulans 1  
 1.381786044 1.529707742 0.938112866 0.749923504 1 1.319745318  
 1.29862818 0.898621773 1 2.848274776 1.033802766 1.099518772  
 0.781448892 1 2.249827772 1.223542567 0.978366222 1  
 1.53950854 1.866001455 0.703070225 0.764608916 1 2.27672393  
 1.466854487 0.996528226 0.971011461 0.895453597 1 1.908257073  
 1.222410253 0.910258049 0.8859402 0.380640186 1 2.283352208  
 1.864932736 0.636916609 1.207734063 0.887882787  
 YLR036C YLR036C::YLR036C::molecular\_function unknown 1 0.846337111  
 0.824968687 0.742126989 1.134367823 1 0.681416124 0.624246761  
 0.80086974 1 0.708008804 0.709523307 0.86309866 0.735424905 1  
 0.966683167 0.748762705 1.027936052 1.454678912 1 1.769177345  
 2.322730386 2.451812931 1.710225217 1 0.976542124 1.392802889  
 1.118155326 1.083082168 1.159275916 1 0.854286951 1.010054628  
 1.165127142 1.064989642 1.602203129 1 1.092614552 1.140396114  
 1.073198751 1.298774776 1.225951017 1.516580762

YKL045W YKL045W::PRI2::p58 polypeptide of DNA primase 1 0.868878904  
0.877206113 1.102848507 0.888487676 1 0.961931399 0.971360165  
1.154364303 0.973156746 1 0.581788901 0.652429332 0.573340075  
1.340171156 1 0.584916632 0.354864156 0.42245714 1.034227544 1  
0.622270737 0.653917682 1.296675409 1 0.885175004 1.079471541  
1.063842133 0.759681142 1.276744073 1 1.01811744 1.160180805  
1.276208508 1.366979575 1.070386094 1 1.194634228 1.178266634  
1.237511172 1.078736728  
YKL059C YKL059C::MPE1::Protein required for cell viability 1  
1.189565282 1.137857074 1.273847327 1.085531672 1 1.094496314  
1.17148987 1.27483007 1.159378616 1 1.435658591 1.195218247  
1.269511629 1.432310039 0.53900932  
1 1.263746244 1.302729472 1.182967644 1.075700699  
1.320336928 1 1.184683884 1.160983331 1.159915158 1.026649948  
0.720586317 1 0.996984568 0.852327298 0.877585684 0.622484162  
1.12148252 2.149656853  
YKL061W YKL061W::YKL061W::molecular\_function unknown 1 1.720893962  
1.523360591 1.553450515 2.335311579 1 1.42593219 1.258852141  
1.82977089 1.609933247 1 1.482190334 1.416636433 1.938855503  
1.720533419 0.695096897 0.738071505 0.722031942 1  
1.531678282 2.190978791 1.111588188 0.690052686  
0.750435559 1.20757243 0.762931518 1.260838952  
2.636224245 1 0.84551855 1.341627355 1.190790142 1.35559727  
2.042830744  
YKL063C YKL063C::YKL063C::molecular\_function unknown 1 0.857299775  
1.190742647 0.863087698 1.460782352 1 0.870600328 0.81750522  
1.423566579 1.212225629 1 0.794570735 1.114832049 1.385975696  
1.248095388 1 1.170734636 1.052805706 1.307693374 1  
1.904552007 2.203641908 2.724922076 1.414671778 1 0.768458161  
0.967215554 0.528722385 0.544945037 0.928710685 1 1.181034479  
1.607490051 1.303448332 1.660090822 2.600612434 1 1.171592108  
1.327710276 1.281946272 1.985806732 1.431965722 1.566491366  
YKL065C YKL065C::YET1::Yeast homolog of human BAP31 protein 1  
0.988366515 1.441776321 1.069183335 1.650239503 1 1.033244481  
1.105969912 1.79874761 1.418583346 1 1.035686919 1.768088893  
2.64126616 1.446229413 1 2.082991415 1.675802289 2.168873157  
2.462393263 1 2.738767562 4.988796981 2.203875087 1  
1.434498595 1.819160829 1.178477558 0.865467082 1.233044377 1  
1.348687043 2.333470589 1.914857514 1.212959535 2.116132416 1  
1.71935874 2.502439806 1.291343544 2.394412473 1.967198714 1.816044072  
YKL067W YKL067W::YNK1::Nucleoside diphosphate kinase 1 1.022437974  
1.24771332 1.081831529 1.696652298 1 0.998067661 1.102436848  
1.75119691 1.613319014 1 0.975697363 1.372456901 2.625771829  
1.578656673 1 2.18259792 2.029999572 2.575371123 3.248573138 1  
2.983648324 3.007022263 5.002432924 2.971034695 1 1.330519159  
1.852317848 1.73882515 1.106044122 1.145838949 1 1.340704463  
2.209070001 2.372739236 1.601203123 1.547615494 1 1.660779355  
2.455060535 1.337318171 1.97468082 2.327725911 1.617277531  
YKL069W YKL069W::YKL069W::molecular\_function unknown 1 1.460140375  
1.712366013 1.212826256 2.313160939 1 1.255215494 1.201138207  
1.72649078 1.8036536 1 1.299159033 1.554743288 1.634700974  
1.800513731 1 1.381379765 0.984533696 0.765898063 1.394950605 1  
1.78781718 1.946859714 1.624760596 1.530003231 1 0.960543404  
0.929075095 0.700529751 0.797802994 0.728081087 1 1.085381586  
1.207007721 1.007942066 1.168934275 1.487653519 1 1.049939599  
1.284043761 1.179620432 1.345679325 1.362785031 1.943009745

YKL083W YKL083W::YKL083W::molecular\_function unknown 1 1.855748769  
1.489184392 1.474320155 1.63881341 1 1.811922225  
1.617975019 1 1.22888132 1.592232362 1.764912109 1  
0.888361835 1 1.850539604 1 1.224767658  
1.203009709 1.221977747 1.215425942 1.179065591 1 1.381542547  
2.1038008 1.86144685 1 0.983289121 1.205750155  
0.985169009 1.233218473 1.595386951  
YLR038c YLR038c::COX12::essential during assembly for full cytochrome c  
oxidase activity 1 1.229998949 1.420915099 1.726463646 1  
1.02400016 1.072786084 1.41292618 1 0.977071464 1.208939709  
1.526879275 0.956175334 0.629164015 0.941148882 0.441121456  
0.987464675 1 1.738646564 2.071348423 1.984729022 1.529204819  
  
YLR040C YLR040C::YLR040C::molecular\_function unknown 1 1.044375104  
0.97570008 0.793214918 0.929331661 1 0.8754897 0.865771449  
0.862749919 0.705933996 1 1.098019452 0.792032388 0.9671468  
0.603071367 0.584489668 0.450275156 0.677820775 1.021847117 1  
0.833014812 1.201332343 1.184375255 1.281881937 1 1.223269872  
1.108966034 0.741623068 1.075390154 0.751545818 1 0.708255557  
0.678827235 0.817883018 0.964815818 0.984742136 1 0.727349644  
0.920332387 0.615986226 0.830340866 1.154948061  
YLR042C YLR042C::YLR042C::molecular\_function unknown 1 1.321841953  
1.339070096 1.074430081 1.4988098 1 1.119825603 1.162002925  
1.647734035 1 1.283214052 0.796313575 1.069152535 1.02848355 1  
0.629107619 0.670188841 0.599261316 0.605475411 1 1.579947773  
2.182683206 1.254083439 2.375648296 1 0.996662887 0.757359833  
0.583299576 0.582740608 0.718751606 1 0.849796182 0.970637183  
0.832062448 0.629283564 1 1.112421704  
1.680322482  
YLR056w YLR056w::ERG3::C-5 sterol desaturase 1 1.471959621  
0.86823957 0.868755576 0.964580789 1 0.932977632 0.831415231  
0.89565211 1 0.754648049 0.541775213 0.487985769 0.878205113 1  
0.487914106 0.194834721 0.278593681 1.240054047 1 0.674859297  
0.403900105 0.505984614 1.618019817 1 0.9472916 0.614123089  
1.681265554 2.612264332 1.357361216 1 0.446595176 0.471684468  
0.726988237 1.690907587 0.985359877 1 0.774322899 0.583309094  
2.066650498 1.395725771 0.730838832 0.785434741  
YLR058c YLR058c::SHM2::serine hydroxymethyltransferase 1 1.136004953  
0.653667948 0.596140615 0.462711237 1 1.020898456 0.920352662  
0.616233828 0.422588872 1 1.986703545 1.658972938 0.659254585  
0.364253737 1 2.585330482 1.637738773 0.685593795 0.387820858 1  
2.777028564 0.943785632 1.534316316 1 1.493620878 1.261873682  
1.093407469 1.945734342 1.959574603 1 0.764709123 0.600859415  
0.532458322 0.676886439 2.031305405 1 0.688786606 0.470577226  
0.885483702 1.543240547 5.185910329 0.845852802  
YLR060w "YLR060w::FRS1::Phenylalanyl-tRNA synthetase, alpha subunit,  
cytoplasmic" 1 0.857048315 0.741624475 0.888423866 0.86994392 1  
0.9201596 0.781492442 0.771364862 1 0.850710924 0.693474296  
0.445775934 0.854131157 1 0.477167776 0.604298565 0.653127493  
0.434379452 1 0.693990908 0.4250357 0.350161226 0.566926755 1  
1.029505568 0.972303775 1.185789673 1.101175139 1.036988185 1  
1.03626308 0.840896185 0.835640674 0.768270211 0.606132076 1  
0.940095396 0.723940918 0.960025001 0.817274176 0.760313456 1.439525903  
YLR062C YLR062C::BUD28 1 1.254844969 1.785403355 1.046591612  
2.019812536 1 1.181557929 1.040875005 1.905442104 1.503742983 1  
1.070351271 1.056852276 1.21229459 1.196287272 1 0.672370512

|             |                                      |                                                                                                                            |             |             |               |
|-------------|--------------------------------------|----------------------------------------------------------------------------------------------------------------------------|-------------|-------------|---------------|
| 0.281804462 | 0.200949909                          | 0.56462573                                                                                                                 | 1           | 1.641402558 | 1.136961973   |
| 0.786232253 | 0.841081635                          | 1                                                                                                                          | 0.992149786 | 0.811805828 | 0.524753432   |
| 0.608745179 | 0.940189841                          | 1                                                                                                                          | 1.275409798 | 1.557178214 | 1.014178136   |
| 0.750639451 | 2.191214243                          | 1                                                                                                                          | 0.980472318 | 1.783667055 | 1.163150857   |
| 2.107028537 | 1.319960332                          | 1.857198549                                                                                                                |             |             |               |
| YLR064W     | YLR064W::YLR064W::molecular_function | unknown                                                                                                                    | 1           | 1.176131786 |               |
| 1.0368671   | 0.88245451                           | 1.108322066                                                                                                                | 1           | 0.995234451 | 1.016427436   |
| 1.113325449 | 1                                    | 1.175593214                                                                                                                | 1.027158209 | 1.528559767 | 0.868965568 1 |
| 1.129910493 | 0.924957961                          | 1.316392233                                                                                                                | 1.576039749 | 1           | 1.148524787   |
| 1.461048413 | 1.955885297                          | 1.29633921                                                                                                                 | 1           | 1.088447424 | 1.385004511   |
| 1.104359074 | 1.04663376                           | 0.906530477                                                                                                                | 1           | 1.09819653  | 1.227783719   |
| 0.804436681 | 0.665950813                          | 0.847312199                                                                                                                | 1           | 1.13636604  | 1.256357377   |
| 1.043856449 | 1.251859511                          | 0.913851145                                                                                                                | 0.885255897 |             |               |
| YKL085W     | YKL085W::MDH1::mitochondrial         | malate dehydrogenase                                                                                                       | 1           |             |               |
| 1.270924354 | 1.4640576                            | 1.46392693                                                                                                                 | 1.213903635 | 1           | 1.69149728    |
| 1.926060621 | 1.327343137                          | 1.504972262                                                                                                                | 1           | 1.195561919 | 1.479513807   |
| 1.956347932 | 1.5033527                            | 1                                                                                                                          | 2.702170827 | 2.00232954  | 2.483246935   |
| 2.29196405  | 1                                    | 2.191592655                                                                                                                | 1.257120396 | 1.829445959 | 2.155808007 1 |
| 1.246905524 | 1.296015922                          | 1.204818972                                                                                                                | 1.019023104 | 1.117436637 | 1             |
| 1.054635389 | 1.195301112                          | 1.082610358                                                                                                                | 0.582604147 | 0.769487352 | 1             |
| 1.615091147 | 1.70670518                           | 0.975009572                                                                                                                | 1.431105929 | 2.726526058 | 1.199604884   |
| YLR066W     | YLR066W::SPC3::signal                | peptidase subunit                                                                                                          | 1           | 1.104205808 |               |
| 1.535818913 | 1.036422007                          | 1.959592496                                                                                                                | 1           | 1.062561434 | 0.944414219   |
| 1.839487134 | 1.499623157                          | 1                                                                                                                          | 0.92768496  | 1.236735402 | 1.55513811    |
| 1.376568053 | 1                                    | 0.942875636                                                                                                                | 0.469738179 | 0.680431715 | 1.34774606 1  |
| 1.696103897 | 2.122053266                          | 2.091213232                                                                                                                | 1.147088507 | 1           | 0.997190452   |
| 1.363070158 | 0.878794435                          | 0.945756322                                                                                                                | 0.99006792  | 1           | 1.060976247   |
| 1.768385238 | 1.554270608                          | 1.341083466                                                                                                                | 2.088314512 | 1           | 1.389463809   |
| 1.752260019 | 1.252358879                          | 2.077654286                                                                                                                | 1.377824457 | 1.287167305 |               |
| YKL087C     | YKL087C::CYT2::links                 | heme covalently to apocytochrome c1                                                                                        | 1           |             |               |
| 0.951206413 | 1.207961831                          | 1.126462241                                                                                                                | 1.525605535 | 1           | 1.018887362   |
| 1.130491065 | 1.400613695                          | 1.606810539                                                                                                                | 1           | 1.382482195 | 1.223115972   |
| 1.683817494 | 1.26721501                           | 1                                                                                                                          | 1.175257956 | 0.919116114 | 0.818652421   |
| 1.011837975 | 1                                    | 2.31163682                                                                                                                 | 1.678987246 | 2.829726888 | 1.71116929 1  |
| 1.396771599 | 1.276722663                          | 0.981333917                                                                                                                | 1.071146478 | 1.091520848 | 1             |
| 1.399081737 | 1.058495761                          | 0.939999651                                                                                                                | 1.063540017 | 1.078122281 | 1             |
| 1.583230315 | 1.075468494                          | 1.14012151                                                                                                                 | 1.09730281  | 1.418149363 | 1.960522208   |
| YLR080W     | YLR080W::EMP46::Evidence             | suggests that Emp46p and Emp47p are required for the export of specific glycoprotein cargo from the endoplasmic reticulum. | 1           | 0.813192837 | 1.326982635   |
| 1.18180959  | 1.33738754                           | 1.616781276                                                                                                                | 1           | 1.115450411 | 1.871032997   |
| 2.966382017 | 2.008053667                          | 1                                                                                                                          | 1.451594828 | 1.149519579 | 1.90547469    |
| 2.30867414  | 1                                    | 1.441392989                                                                                                                | 3.693557382 | 4.167922752 | 1.716396084 1 |
| 0.999096069 | 1.217037444                          | 1.244726081                                                                                                                | 1.082636251 | 1           | 0.828944788   |
| 1.344117205 | 1.524126517                          | 1.122597087                                                                                                                | 1           | 1.035299425 | 1.177572478   |
| 1.347366702 | 1.089455795                          | 1.35420396                                                                                                                 | 0.992957567 |             |               |
| YKL089W     | YKL089W::MIF2::centromere            | protein required for normal chromosome segregation and spindle integrity                                                   | 1           | 0.864515773 | 1.010577654   |
| 1.208800802 | 1                                    | 0.871747065                                                                                                                | 0.915727765 | 1.297119746 | 1.040809135 1 |
| 0.932802948 | 0.86178362                           | 0.805716622                                                                                                                | 1.150084696 | 1.172702151 |               |
| 0.746767812 | 0.75743782                           | 1                                                                                                                          | 1.643012994 | 1.381732086 | 1             |
| 1.000760014 | 1.063325698                          | 0.76865363                                                                                                                 | 0.770418903 | 1.30282515  | 1             |
| 0.868445769 | 1.106179099                          | 1.251368668                                                                                                                | 1.013497304 | 0.949565313 | 1             |
| 0.978029505 | 0.962047893                          | 1.186036952                                                                                                                | 1.011649241 | 1.182684375 | 1.334451019   |
| YKL091C     | YKL091C::YKL091C::molecular_function | unknown                                                                                                                    | 1           | 1.185631687 |               |
| 1.88845041  | 1.675087404                          | 1.933141725                                                                                                                | 1           | 1.444878674 | 2.04451309    |
| 2.184214791 | 1.611752075                          | 1                                                                                                                          | 1.75905306  | 2.784857492 | 4.993949428   |



1.501035857 1 2.134199712 2.356132483 3.239139718 2.402120437 1  
3.82395246 4.035297483 8.471568422 2.714878484 1 1.630202558  
2.448054546 2.115354961 0.820329084 1.240627677 1 1.563145296  
1.947799677 2.80198181 1.433423124 1.444224647 1 2.093072824  
2.534422712 1.296272639 1.512340089 2.800873297 2.710931866  
YKL093W YKL093W::MBR1::Involved in mitochondrial biogenesis 1  
1.26546421 1.352329475 1.314606434 0.953592413 1 1.279207546  
1.242476154 1.504005117 1.245840788 1 1.295921857 1.276795381  
2.039408754 1.115110663 1.096161627 1.862154808 1  
1 0.761949155 0.981873505 1.143810931 1.369246463  
1.091858139 1 0.897038227 0.739785826 0.907457101 1.084547827 1  
0.612983752 0.993986487 1.362686414  
YKL106W "YKL106W::AAT1::aspartate aminotransferase, mitochondrial" 1  
1.222878583 0.906132917 1.206243843 0.96446065 1 0.935707339  
1.064549537 1.272067389 1.193789204 1 1.295117503 0.798133873  
0.668337378 1.088532872 1 1.027334726 0.9378899 0.989173055  
0.945497982 0.922020259 0.619493348 0.631213416 0.981681999 1  
0.811432061 0.786084695 0.999503091 0.954939707 0.961647454 1  
0.836504878 0.761746072 0.735877437 0.829732972 0.514812466 1  
1.078339876 0.891713968 0.97760459 0.972324431 0.809310953  
YKL108W YKL108W::SLD2::Synthetically lethal with dpb11-1; required for DNA  
replication 1 1.422252485 1.507726634 1.575637493 1.399598524 1  
1.444357502 1.364063128 1.551384859 1 1.274664557 1.006452113  
1.091644644 1.462965664  
1 0.700260594 0.842958268 0.736104178 0.606850281 0.929020847 1  
1.26376194 1.514766081 1.476964776 2.215136218 1.649782966 1  
1.361008853 1.393838262 1.613550971 1.092778775  
YKL110C YKL110C::KTI12::Protein involved in resistance to K. lactis killer  
toxin; RNA polymerase II Elongator associated protein 1 1.188378743  
1.016892998 0.976645571 1.297209934 1 0.953425567 0.846069734  
1.581042488 1.326510794 1 0.802923857 0.69956617 0.715283112  
1.185018726 1 1.018957744 0.604949223 0.818470801 1.270986924 1  
1.210962228 1.369629419 1.710777795 1.215645245 1 1.048717344  
0.867592883 0.752132109 0.835097352 0.960319829 1 1.079994385  
1.039411113 0.648298099 0.994421144 1.341857465 1 0.944797558  
0.77193866 0.968921514 1.302616931 0.68097105 1.089276219  
YKL112W YKL112W::ABF1::transcriptional activator and ARS1 binding protein 1  
0.781731407 0.711267343 0.966732888 0.796713151 1 0.846796518  
0.94114093 0.768265188 0.745074183 1 0.663799086 0.736139181  
0.565983249 1.067078408 1 1.039721897 1.494724138 1.579735765  
0.700903868 1 0.666409966 0.357808863 0.411732732 0.528270773 1  
0.890582571 0.78466086 0.833980194 0.835312379 0.98235671 1  
0.810616026 0.717037827 0.687784917 0.718084094 0.717156993 1  
0.722374147 0.792412123 1.158317213 0.930815467 0.744280421  
YKL114C YKL114C::APN1::major apurinic/aprimidinic endonuclease/3'-repair  
diesterase 1 1.025440273 0.884582498 0.998462247 0.997925163 1  
0.946609798 0.855412907 0.915731247 0.99020589 1 0.825872619  
0.947736044 0.838600153 1.172585974 1 1.230175215 0.911023435  
0.874689024 0.951984979 1 1.107378703 0.611395857 0.627601486  
0.802439827 1 1.063046208 1.2270146 1.405402858 1.075128388  
1.183676206 1 1.109806857 1.484198943 1.235659708 1.213578308  
1.301457427 1 1.091553781 1.182460305 1.170865482 1.192042535  
0.809795809 0.963186421  
YDR224C YDR224C::HTB1::Histone H2B (HTB1 and HTB2 code for nearly identical  
proteins) 1 1.098843197 1.414480739 0.911734542 2.603593781 1  
1.054667043 0.895619007 1.47767995 1.239379472 1 0.871617725  
1.030440116 0.92791779 1.276297587 1 0.608413309 0.348902327

|         |                                                                                                              |             |             |             |             |             |             |
|---------|--------------------------------------------------------------------------------------------------------------|-------------|-------------|-------------|-------------|-------------|-------------|
|         | 0.389950531                                                                                                  | 0.832778357 | 1           | 1.170213719 | 0.809648761 | 1.170527075 |             |
|         | 0.795631609                                                                                                  | 1           | 1.018307236 |             | 0.642016855 | 0.832094206 | 1.081801876 |
|         | 0.611538349                                                                                                  | 0.915052073 | 0.690080342 | 1.025022577 | 1.336522258 | 1           |             |
|         | 0.551569242                                                                                                  | 0.809439206 | 1.123530705 | 1.688231037 | 1.078115273 | 1.253893604 |             |
| YDR226W | YDR226W::ADK1::adenylate kinase                                                                              |             |             | 1           | 1.041793819 | 1.091718988 |             |
|         | 0.871706854                                                                                                  | 1.279018367 | 1           | 0.941406373 | 0.919228925 | 1.206469323 |             |
|         | 1.317082389                                                                                                  | 1           | 0.931276569 | 1.018300746 | 1.205121255 | 1.016625056 | 1           |
|         | 1.42902932                                                                                                   | 1.227916685 | 1.077287598 | 1.743259086 | 1           | 1.278519349 |             |
|         | 1.216817198                                                                                                  | 1.357950439 | 1.275882097 | 1           | 1.538964865 | 1.069650506 |             |
|         | 1.753787672                                                                                                  | 1.436086056 | 1.215928169 | 1           | 2.022763671 | 1.697805094 |             |
|         | 1.983633177                                                                                                  | 1.028968644 | 0.999266606 | 1           | 1.018758489 | 0.878874879 |             |
|         | 0.881807618                                                                                                  | 0.673693865 | 1.158450512 |             |             |             |             |
| YDR228C | "YDR228C::PCF11::pre-mRNA cleavage and polyadenylation factor I component, interacts with Rna14p and Rna15p" |             |             | 1           | 0.657766889 | 0.74582843  |             |
|         | 0.918627743                                                                                                  | 0.89653008  | 1           | 0.863635863 | 0.735677471 | 0.775755894 | 1           |
|         | 0.783013802                                                                                                  | 0.824502899 | 0.760760826 | 0.816499418 | 1           | 1.055270509 |             |
|         | 1.067758408                                                                                                  | 1.048032567 | 1           | 1.033206717 | 1.260251607 |             |             |
|         | 1.119788746                                                                                                  | 0.711005632 |             | 0.883024937 | 0.7601311   | 0.970268264 | 1           |
|         | 1.159140017                                                                                                  | 1.01385198  | 1.102288783 | 0.945554941 | 0.671612593 | 1           |             |
|         | 0.818461921                                                                                                  | 0.852514853 | 0.963930341 | 1.096193926 | 0.808253352 | 0.800320314 |             |
| YDR230W | YDR230W::YDR230W::molecular_function unknown                                                                 |             |             | 1           | 1.204041634 |             |             |
|         | 2.028524941                                                                                                  | 1.29867152  | 2.033832192 | 1           | 1.271962701 | 1.481348519 |             |
|         | 2.015741012                                                                                                  | 1.803901751 | 1           | 1.472597227 | 1.849458143 | 3.487597302 |             |
|         | 1.574784106                                                                                                  | 1           | 1.747498222 | 1.188468151 | 1.492611195 | 2.652165774 | 1           |
|         | 2.555033957                                                                                                  | 3.855204432 | 4.009450853 | 1.254041732 |             | 1.314732615 |             |
|         | 1.637393419                                                                                                  | 1.094183002 |             | 1.109971488 | 1           | 1.449587179 | 1.597642002 |
|         | 1.535492103                                                                                                  | 2.388430603 |             | 1.374894003 |             | 0.91548272  | 1.509118667 |
|         | 1.284660477                                                                                                  | 1.663685579 |             |             |             |             |             |
| YDR232W | YDR232W::HEM1::First enzyme in heme biosynthetic pathway                                                     |             |             | 1           |             |             |             |
|         | 1.365330745                                                                                                  | 0.850153052 | 0.933295762 | 0.411730815 | 1           | 1.231879811 |             |
|         | 1.058938599                                                                                                  | 0.618338456 | 0.792680205 | 1           | 1.049223798 | 0.710905047 |             |
|         | 0.833610066                                                                                                  | 0.793389826 | 1           | 0.518910342 |             | 0.629762641 | 0.639877436 |
|         | 0.446332776                                                                                                  | 0.340710316 |             | 0.485246856 | 1           | 0.641971975 | 0.427401667 |
|         | 0.441779676                                                                                                  | 0.989931424 | 0.792658894 | 1           | 0.50664585  | 0.361582855 |             |
|         | 0.412557414                                                                                                  | 0.566837789 | 0.536951129 | 1           | 0.547235873 | 0.47308068  |             |
|         | 0.72679748                                                                                                   | 0.922602371 | 0.676428538 | 0.632200531 |             |             |             |
| YLR082C | YLR082C::SRL2::Suppressor of Rad53 null Lethality                                                            |             |             | 1           |             |             |             |
|         | 0.701069685                                                                                                  | 1.245078767 |             | 1           | 1.069491707 | 1.278514022 |             |
|         | 1.108247889                                                                                                  | 1           | 1.017522073 | 1.266417642 |             | 1.411330716 | 1           |
|         | 0.464095547                                                                                                  | 0.357434048 | 0.473273387 | 0.989953366 | 1           | 1.017245744 |             |
|         | 2.149612362                                                                                                  | 1.100949786 | 1           | 1.066544458 | 1.360884862 | 1.235267313 |             |
|         | 1.318707669                                                                                                  | 1.592535941 | 1           | 1.17313503  | 1.164007974 | 1.241924485 |             |
|         | 1.310106083                                                                                                  | 1           | 1.076145431 | 0.806147605 | 1.052611485 | 0.556236118 |             |
|         | 0.900053074                                                                                                  | 1.140938049 |             |             |             |             |             |
| YLR084C | YLR084C::RAX2::Involved in the maintenance of bipolar pattern                                                |             |             | 1           |             |             | 1           |
|         | 1.257493157                                                                                                  | 0.947626397 |             | 1           |             | 0.905909121 | 1           |
|         | 0.976638553                                                                                                  | 1.011487135 | 0.882872352 | 1.128211999 | 1           | 0.779232984 |             |
|         | 0.82278015                                                                                                   | 0.640390173 | 1           | 0.692726656 |             | 1           |             |
|         | 0.897763041                                                                                                  | 0.802106619 | 0.839567048 | 1.087957772 | 0.878167581 | 1           |             |
|         | 0.981260002                                                                                                  | 0.743685311 |             | 1           | 1.141676171 | 1.032196044 |             |
|         | 1.060130982                                                                                                  | 0.977497402 | 0.672479238 |             |             |             |             |
| YDR260C | YDR260C::SWM1::Spore Wall Maturation                                                                         |             |             | 1           | 1           | 0.957134141 |             |
|         | 0.80190204                                                                                                   | 0.950082711 | 0.790645301 | 1           | 0.955412604 | 1.034010642 |             |
|         | 0.740148591                                                                                                  | 0.826599482 | 1           | 1.004133592 | 1.055348022 | 0.903462857 |             |
|         | 0.843372276                                                                                                  | 1           | 1.013148087 | 0.948663844 | 1.281344425 | 0.986876445 | 1           |
|         | 1.165800867                                                                                                  | 0.719605654 | 0.701303694 | 1.072253689 | 1           | 1.011077305 |             |
|         | 0.96453632                                                                                                   | 1.189939618 | 1.203346604 | 1.165741379 | 1           | 0.916712489 |             |

0.811346529 1.026139558 0.94862784 0.589003422 1 0.832920936  
 0.9003093 1.195678503 0.903962945 0.817749625 1.04024128  
 YDR262w YDR262w::YDR262W::molecular\_function unknown 1 1.017845956  
 1.074624124 0.850682364 1.036607949 1 0.966230198 1.000300558  
 0.973597743 0.895407761 1 0.998727558 1.114493228 1.278883514  
 0.968764663 1 1.382305032 0.92264032 1.221109699 1.711667791 1  
 1.636089894 1.121352527 1.518122092 1.050752591 1 0.939496103  
 1.100977764 1.116419344 1.00651249 1 1.046683063 1.288013531  
 1.295665456 1.255345174 1.424165972 1 1.070787763 1.135167751  
 1.222254095 1.668604562 1.049396817 1.309933549  
 YLR086W YLR086W::SMC4::Stable Maintenance of Chromosomes 1  
 0.903560578 0.990153195 1.177900956 0.908808124 1 1.258883198  
 1.291034274 0.807634127 1 1.07754596 0.624107672  
 1.48005971 1 1.155707487 1.00199678 0.714305172  
 1 0.822059054 0.912024826 0.822082951 0.911771165  
 0.957280872 1.056366687 0.731432639 0.772494567 1.06318908  
 0.62651796 1 1.136372163 0.97391489 1.288568545 0.568438845  
 1.059836726 1.004340689  
 YDR263C YDR263C::DIN7::DNA-damage inducible gene 1 0.974721502  
 0.853109415 0.871424349 0.901676602 1 0.857798107 0.770937974  
 1.001328438 1.013620871 1 1.129805451 0.985198256 1.021109269  
 1.016372087 1 1.068260492 0.649927275 1.16822828 1  
 1.276199992 3.086622813 1.643446585 1.586147131 1 1.190498073  
 1.141412974 1.535810797 1.142311584 1.197310638 1 1.040732333  
 1.12553855 1.095130307 0.854271058 0.970899529 1 0.943078564  
 1.026097254 0.843460292 0.816725326 0.746029014 0.904519585  
 YLR088w YLR088w::GAA1::ER protein essential for attaching GPI  
 (glycosylphosphatidylinositol) to protein 1 1.029673011 0.827633229  
 0.928564569 0.894202203 1 0.994400379 0.903950331 0.90246832  
 0.707209961 1 0.923200335 0.780978324 0.584588199 0.913713056 1  
 1.488532553 0.911628649 1.065506827 0.797224969 1 0.865165896  
 0.669046899 0.595242351 0.724217798 1 0.898615551 0.813646461  
 0.901449577 1.115225574 1.113423699 1 0.620368941 0.621421188  
 0.862283824 0.807674843 0.517860385 1 0.907726137 0.69189759  
 1.091536895 0.703879017 0.777248104 1.215366122  
 YDR264C YDR264C::AKR1::Negative regulator of pheromone response pathway;  
 required for endocytosis of pheromone receptors; involved in cell shape control  
 1 0.888143848 0.739094384 1.058196584 0.837107446 1 1.057170072  
 0.988857883 0.650324741 0.724612545 1 1.702224921 1.448449144  
 0.56193492 1.040653793 1 1.428921067 1.017146809 0.809260229  
 0.745476624 1 1.537196842 0.750734969 0.302514415 1.130391968 1  
 1.702126436 1.871389917 2.098818773 1.40619682 1.368870787 1  
 1.352518688 1.137199416 1.80007122 1.545471326 0.379850667 1  
 1.393170557 0.957116493 1.223084298 0.54654465 0.655637047 0.72501668  
 YLR090w "YLR090w::XDJ1::Homolog of E. coli DnaJ, closely related to Ydj1p"  
 1 0.768155324 1.016739119 1.118977148 0.846264519 1 0.985693685  
 1.047956116 1.112646956 1.098271153 1 0.960590541 1.008190532  
 0.98022995 1.003000674 1 0.681372158 0.628118596 0.742194529  
 1.000286671 1 1.098125264 1.504265636 1.15579921 1.250753194 1  
 1.037617049 1.198868988 1.113454908 1.025445164 1.205934515 1  
 1.083589552 0.813191508 1.042167977 0.888193972 0.751353237 1  
 0.970700467 0.605592312 0.991974287 0.731895416 0.912600391 1.731108646  
 YDR265W YDR265W::PEX10::C3HC4 zinc-binding integral peroxisomal membrane  
 protein 1 0.74077006 0.760448782 0.914369641 0.60633895 1  
 0.835315254 0.897581513 0.97225136 1 0.824509981 1.003994349  
 0.919789341 0.960845802 1 1.229981461 0.765102041 0.95297321  
 1.35260855 1 1.95020241 2.520820884 2.524006184 2.28172865 1

1.09872506 1.261959637 1.181025735 0.909662577 1.172269491 1  
1.238736577 1.099009645 1.078209857 0.953433441 0.813519849 1  
1.476739863 1.1176992 1.033542331 0.965820543 1.056625218 0.943047067  
YLR104W YLR104W::YLR104W::molecular\_function unknown 1 1.201604066  
1.450174759 1.059049412 1.819280928 1 1.094534727 1.531079319  
1.444220736 1 1.292664723 1.26632971 1.662726248 1.219913983  
0.566806069 0.497025057 0.441121456 0.693150707  
0.928041139 1.194760241 1 0.998951986 1.019697417 0.833642798  
0.833685964 1.10258105 1 0.869987634 1.222289583 1.194340159  
0.899509112 1.172216373 1 1.001080816 1.150704005 0.954522234  
1.184557263 0.769407413 1.722352415  
YLR106C "YLR106C::MDN1::midasin, a large protein with an N-terminal domain,  
a central AAA domain (with similarity to dynein) composed of 6 tandem AAA  
protomers, and a C-terminal M-domain containing MIDAS (Metal Ion Dependent  
Adhesion Site) sequence motifs" 1 1.287890413 1.293409896 1.40696329  
1.445280825 1 1.404412017 1.402442197 1.265049958 1.516691097 1  
1.319470031 1.312838111 1.638596024 1.240232513 1 1.14204443  
1.211831575 1.342613781 1.121411701 1 1.664826091 1  
1.064400483 1.063392396 2.235126374 1.127340546 0.996036123 1  
1.154354357 1.200553317 1.360019371 0.77802155 0.57187263 1  
1.167129527 1.250232984 1.418509825 0.754616174 1.118387609 1.900104147  
YLR108C YLR108C::YLR108C::molecular\_function unknown 1 0.977533989  
1.035668268 0.956389619 0.606694862 1 0.967871591 0.951568144  
0.529323298 1 3.213027851 2.660775709 1.020941442 0.847236175 1  
12.66287519 9.53500316 5.156027985 3.104595935 1 12.29998817  
7.11430219 6.189331995 2.768776766 1 2.981325038 3.070756546  
2.151041297 0.813689738 0.730639898 1 4.087024519 2.727120989  
2.65710511 2.160889271 0.87035935 1 3.825675311 3.116215364  
1.988787228 0.896284506 1.081496281 1.926372842  
YKL116C YKL116C::PRR1 1 1.289645008 1.122167404 1.524025089  
1.146793382 1 1.316500038 1.391125249 1.120163898 1  
1.138158222 1.120967758 0.900248417 1.29927595 1 1.416923733  
0.734589356 1 0.914061804 0.958715206  
0.83082915 0.882845429 0.866378814 1 1.044878074 0.919877363  
0.852496191 0.815470185 0.973456936 1 1.282375632 1.076734586  
1.075927865 1.17070117 1.141786863  
YLR110C YLR110C::CCW12 1 1.54757398 1.346459502 0.790256786  
1.359767463 1 1.052189861 1.053016129 1.096470112 1.312949676 1  
1.164937534 0.909234199 1.655090883 0.751028235 1 0.611279808  
0.482157066 0.615512636 0.551707287 1 1.069525451 1.154493485  
1.058406319 0.652335107 1 1.006628826 0.650444113 0.592966419  
1.159487251 0.837588237 1 0.866418694 0.848868728 0.614839362  
0.375137365 0.819479694 1 0.854331188 0.781504514 0.605825204  
1.183036163 0.93476888 0.971066988  
YKL130C YKL130C::SHE2::Required for mother cell-specific HO expression 1  
1.219159867 1.187778562 1.048048597 1.42258277 1 0.973361299  
0.928644103 1.565314294 1.382708659 1 0.882804209 1.019353621  
1.187931102 1.351173353 1 0.740315408 0.485363269 0.583814417  
0.939425781 1 1.835503965 1.654031436 1.290752645 1.059969707 1  
1.124916709 1.08247801 1.079599373 1.266262441 1.097505095 1  
1.043129481 1.170514724 0.79792333 0.931921281 1.492723064 1  
1.159157639 1.274698804 1.098239431 1.57800448 1.129114483 1.107664347  
YLR112W YLR112W::YLR112W::molecular\_function unknown 1 1.552059688  
1.229441475 1.108001738 1.543104726 1 1.217387125 1.069743225  
1.245840767 1 0.951655767 1.032707475 1.138097275 1.021228123 1  
0.667469247 0.422990512 0.744603363 0.850332856 1 1.125732022  
1.753252307 1.949782126 0.649517514 1 1.015936772 0.960564253

|         |                                                                                                                                     |             |             |             |             |             |             |             |             |
|---------|-------------------------------------------------------------------------------------------------------------------------------------|-------------|-------------|-------------|-------------|-------------|-------------|-------------|-------------|
|         | 0.851749298                                                                                                                         | 1.084459283 | 0.913712531 | 1           |             | 0.701355396 | 0.49462918  |             |             |
|         | 1.261897313                                                                                                                         | 1           | 0.839003337 | 0.786429472 | 1.070887735 | 1.04093002  |             |             |             |
|         | 1.216241787                                                                                                                         |             |             |             |             |             |             |             |             |
| YKL132C | YKL132C::RMA1::Similar to folyl-polyglutamate synthase                                                                              |             |             |             |             |             |             | 1           |             |
|         | 1.414420918                                                                                                                         | 1.151606272 | 1.374139451 | 1.08951943  | 1           | 1.387335807 |             |             |             |
|         | 1.139034754                                                                                                                         | 1.215670865 | 1           | 1.184633177 | 1.124134809 | 0.992551274 |             |             |             |
|         | 1.353163047                                                                                                                         | 1           | 1.308188972 | 0.940087432 | 1           | 0.987403923 |             |             |             |
|         | 0.773178704                                                                                                                         | 0.51937755  | 1           | 1.155328159 | 1.098455306 | 1.104250642 |             |             |             |
|         | 1.166740918                                                                                                                         | 1.347348477 | 1           | 0.880843822 | 0.844858282 | 0.667537565 |             |             |             |
|         | 1                                                                                                                                   | 1.065564319 | 0.746785219 | 1.140770481 | 0.745726117 | 1.304599741 |             |             |             |
|         | 0.740777918                                                                                                                         |             |             |             |             |             |             |             |             |
| YKL134C | YKL134C::1-Oct::mitochondrial protein import machinery component involved in the biogenesis of the oxidative phosphorylation system |             |             |             |             |             |             | 1           |             |
|         | 1.137024284                                                                                                                         | 1.045987993 | 1.377650573 | 1.336012157 | 1           | 1.319136192 |             |             |             |
|         | 1.409119787                                                                                                                         | 1.23504084  | 1.024378421 | 1           | 1.350944041 | 1.043606378 |             |             |             |
|         | 0.912531706                                                                                                                         | 1.248669132 | 1           |             | 0.618354475 |             |             |             |             |
|         |                                                                                                                                     | 1           | 0.84548188  | 0.969012136 | 0.91926134  | 1.043018749 |             |             |             |
|         | 0.912559146                                                                                                                         | 1           | 1.039069278 | 0.707028056 | 0.94613523  | 0.854627126 |             |             |             |
|         | 0.526424188                                                                                                                         | 1           | 0.933044992 | 0.693660376 | 0.736543244 | 0.708891225 |             |             |             |
|         | 0.816013773                                                                                                                         | 2.289756768 |             |             |             |             |             |             |             |
| YKL136W | YKL136W::YKL136W::molecular_function unknown                                                                                        |             |             |             |             |             |             | 1           | 1.2305773   |
|         | 1.558826136                                                                                                                         | 1.264117742 | 1.463693484 | 1           | 1.171309222 | 1.160979265 |             |             |             |
|         | 1.858140252                                                                                                                         | 1.583057904 | 1           | 1.565454218 | 1.408912675 | 2.253565219 |             |             |             |
|         | 1.50755681                                                                                                                          |             |             | 0.753134187 | 0.733034357 |             |             |             |             |
|         | 1                                                                                                                                   | 0.833406667 | 0.986191716 | 0.915479258 | 0.725626014 | 0.94021158  | 1           |             |             |
|         | 1.215306728                                                                                                                         | 1.259883413 | 1.421939448 | 1.472085939 | 1.139800581 | 1           |             |             |             |
|         | 0.937907875                                                                                                                         | 1.109824334 | 1.070295388 | 0.968691277 | 1.201631212 | 1.777516695 |             |             |             |
| YKL138C | YKL138C::MRPL31::15.5 kDa mitochondrial ribosomal protein YmL31                                                                     |             |             |             |             |             |             | 1           |             |
|         | 0.77069806                                                                                                                          | 1.23136271  | 1.050521038 | 1.687252468 | 1           | 0.877806608 |             |             |             |
|         | 1.093952186                                                                                                                         | 1.65037628  | 1.462495204 | 1           | 0.948214744 | 1.04283705  |             |             |             |
|         | 1.704736935                                                                                                                         | 1.073281554 | 1           | 1.091415515 | 0.781824759 | 0.689610826 |             |             |             |
|         | 1.62027413                                                                                                                          | 1           | 2.803530491 | 4.005456249 | 3.33691676  | 1.617842695 | 1           |             |             |
|         | 0.978765537                                                                                                                         | 1.329724475 | 0.769049026 | 0.592397365 | 0.991288714 | 1           |             |             |             |
|         | 1.298951697                                                                                                                         | 2.16542818  | 1.376037015 | 1.221932985 | 2.540178191 | 1           |             |             |             |
|         | 1.078851395                                                                                                                         | 1.938403266 | 1.033730703 | 1.802543486 | 2.207035246 | 1.491187628 |             |             |             |
| YKL140W | YKL140W::TGL1::triglyceride lipase-cholesterol esterase                                                                             |             |             |             |             |             |             | 1           |             |
|         | 1.134266142                                                                                                                         | 1.089322166 | 1.299543883 | 1.146435713 | 1           | 1.211581315 |             |             |             |
|         | 1.391617561                                                                                                                         | 1.048358085 | 0.900607766 | 1           | 1.544235761 | 1.20128149  |             |             |             |
|         | 0.809577469                                                                                                                         | 1.218112867 |             |             | 2.030234584 | 0.752288541 |             |             |             |
|         |                                                                                                                                     |             |             |             | 0.990614515 | 1.215849703 | 1.217442873 | 1.133409824 |             |
|         | 1.119540199                                                                                                                         | 1           | 1.084310944 | 0.833989455 | 1.245505613 | 0.973828649 |             |             |             |
|         | 0.595573909                                                                                                                         | 1           | 1.279402165 | 0.922231746 | 1.057623956 | 0.806367671 |             |             |             |
|         | 1.377147008                                                                                                                         | 0.804698482 |             |             |             |             |             |             |             |
| YKL154W | YKL154W::SRP102::Signal recognition particle receptor beta subunit                                                                  |             |             |             |             |             |             |             |             |
|         | 1                                                                                                                                   | 0.796241984 | 1.010366059 | 0.787007092 | 1.33659748  | 1           | 0.803236739 |             |             |
|         | 0.746027031                                                                                                                         | 1.458963468 | 1.111485375 | 1           | 0.80936385  | 0.841443456 |             |             |             |
|         | 1.075925145                                                                                                                         | 1.037452505 | 1           | 0.733640136 | 0.571547453 | 0.66645137  |             |             |             |
|         | 0.960139053                                                                                                                         | 1           | 1.194602627 | 1.830461309 | 1.994610539 | 0.831558924 | 1           |             |             |
|         | 0.928248461                                                                                                                         | 1.042073341 | 0.686864007 | 0.752823196 | 1.069918078 | 1           |             |             |             |
|         | 1.176759018                                                                                                                         | 2.355059809 | 1.232993717 | 1.079851704 | 2.074906294 | 1           | 1.401516    |             |             |
|         | 1.608072942                                                                                                                         | 1.219889917 | 2.146972408 | 1.295573116 |             |             |             |             |             |
| YKL156W | YKL156W::RPS27A::Homology to mammalian S27                                                                                          |             |             |             |             |             |             | 1           | 0.922865206 |
|         | 1.124946393                                                                                                                         | 0.740290429 | 1.561569832 | 1           | 0.863246594 | 0.834861217 |             |             |             |
|         | 1.246454396                                                                                                                         | 1.357280648 | 1           | 0.714799616 | 0.66267636  | 0.716404531 |             |             |             |
|         | 0.836303595                                                                                                                         | 1           | 0.433449465 | 0.25411655  | 0.188108129 | 0.613900177 | 1           |             |             |
|         | 0.947898254                                                                                                                         | 0.700798364 | 0.786188566 | 0.82214046  | 1           | 1.01886167  |             |             |             |
|         | 0.876262987                                                                                                                         | 0.614250389 | 0.82508596  | 1.221039575 | 1           | 0.992526504 |             |             |             |

|         |                                      |             |             |             |             |             |             |   |
|---------|--------------------------------------|-------------|-------------|-------------|-------------|-------------|-------------|---|
|         | 1.324267189                          | 0.600831148 | 0.79618272  | 1.7219108   | 1           | 1.13783215  |             |   |
|         | 1.399619138                          | 0.925362196 | 2.346690869 | 1.066603924 |             |             |             |   |
| YKL158W | YKL158W                              | 1           | 0.71838883  | 1.325310342 | 0.886600065 | 1           |             |   |
|         | 1.091805972                          | 1.335892925 | 0.797411819 | 0.724102945 | 1           | 1.010219233 |             |   |
|         | 1.082774738                          | 0.32563321  | 1.147109611 | 1           | 0.812115116 | 1.072103319 |             |   |
|         | 1                                    | 0.719584003 |             |             | 1.297765379 | 1.122472127 |             |   |
|         | 1.427184963                          | 1.049688587 | 1           | 1.076903507 | 0.594903069 | 0.987150811 |             |   |
|         | 1.56021048                           | 0.459337922 | 1           | 0.763604748 | 0.834850548 | 0.998193244 |             |   |
|         | 0.645621165                          | 0.992313082 | 0.570031244 |             |             |             |             |   |
| YDR266C | YDR266C::YDR266C::molecular_function | unknown     |             |             | 1           | 0.722573646 |             |   |
|         | 0.764765669                          | 0.945369136 | 0.816592825 | 1           | 0.923844373 | 0.99677184  |             |   |
|         | 0.761524709                          | 0.81894163  | 1           | 0.741252915 | 0.744698112 | 0.548789673 |             |   |
|         | 0.803283146                          | 1           | 0.647086569 | 0.598833904 | 0.759207449 | 0.761275014 | 1           |   |
|         | 0.644734973                          | 1.008906565 | 0.894629318 | 0.725677165 | 1           | 0.901800255 |             |   |
|         | 0.923717416                          | 0.713627038 | 0.928707156 | 1.127261585 | 1           | 0.876916022 |             |   |
|         | 0.544436481                          | 0.673583317 | 0.671830993 | 0.44918576  | 1           | 0.751613332 |             |   |
|         | 0.641376955                          | 0.7558461   | 0.731698641 | 0.711753908 | 0.795942198 |             |             |   |
| YDR273W | YDR273W::DON1::prospore              | membrane    | localizing  | protein     |             |             |             |   |
|         | 0.824962311                          | 1.042018494 | 1.301521982 | 0.959389639 |             | 0.785762459 |             |   |
|         | 1.119251317                          |             | 1.219201618 | 0.638984926 |             | 1.988899358 |             |   |
|         | 1.151291063                          | 1           | 0.699078865 | 1.516974853 | 1.558334736 | 1           |             |   |
|         | 0.895004956                          | 1.167355437 | 2.451122625 | 1.170095421 | 1           | 0.948824657 |             |   |
|         | 0.975795878                          | 0.966510753 | 0.808939859 | 1.021067676 | 1           | 0.930696393 |             |   |
|         | 1.21072285                           | 1.047920407 | 1.312073305 | 1.84847519  | 1           | 0.997419281 |             |   |
|         | 1.109339262                          | 1.047605358 | 1.226082291 | 0.691742979 |             |             |             |   |
| YDR274C | YDR274C::YDR274C::molecular_function | unknown     |             |             | 1           | 0.924294734 |             |   |
|         | 0.944408445                          | 1.049471432 | 0.73770193  | 1           | 1.019132237 | 1.003542429 |             |   |
|         | 0.983195097                          | 1.029885482 | 1           | 0.950114673 | 1.216858765 | 1.359051102 | 1           |   |
|         | 0.703212592                          |             | 1.303604072 | 1.172932562 | 1           | 1.024794531 |             |   |
|         | 0.807601686                          |             | 1           | 1.009583282 | 1.488373336 | 1.236565723 | 1.392928048 |   |
|         | 1.022977699                          | 1           | 1.252789021 | 1.53337427  | 2.137544479 | 1.475549585 |             |   |
|         | 1.602616484                          | 1           | 1.337454903 | 1.18943916  | 1.345724316 | 1.330967109 |             |   |
|         | 0.810788232                          | 0.681235469 |             |             |             |             |             |   |
| YDR275W | YDR275W::YDR275W::molecular_function | unknown     |             |             | 1           | 1.028639277 |             |   |
|         | 0.945697714                          | 0.895003597 | 0.959728267 | 1           | 0.841037769 | 0.77214473  |             |   |
|         | 1.003173528                          | 1.156881615 | 1           | 0.771221019 | 0.942662326 | 1.205944737 |             |   |
|         | 1.129354923                          | 1           | 0.500694194 | 0.332237868 | 0.6871828   | 1.047896582 | 1           |   |
|         | 1.804679031                          | 4.280728809 | 3.394722495 |             | 1           | 1.262633016 | 1.496052915 |   |
|         | 1.203569825                          | 1.370693548 | 1.047189737 | 1           | 1.153498292 | 2.082746368 |             |   |
|         | 1.529257495                          | 1.150618566 | 3.022151892 | 1           | 0.971907815 | 1.205991901 |             |   |
|         | 0.998420319                          | 1.52741166  | 0.827217986 | 1.002589463 |             |             |             |   |
| YLR114C | YLR114C::YLR114C::molecular_function | unknown     |             |             | 1           | 0.786289837 |             |   |
|         | 0.830029984                          | 0.961303308 | 0.790104131 | 1           | 0.954384878 | 0.944311611 |             |   |
|         | 0.866053652                          | 0.803347357 | 1           | 0.851522353 | 0.854455512 | 0.645156403 |             |   |
|         | 0.972738965                          | 1           | 0.805423369 | 0.586362047 | 0.798589789 | 0.806756911 | 1           |   |
|         | 1.088300018                          | 0.965203148 | 1.00674463  | 0.673007965 | 1           | 0.943705307 |             |   |
|         | 0.880293133                          | 0.968393374 | 1.09809819  | 1.047047306 | 1           | 0.96727179  |             |   |
|         | 0.854695364                          | 0.692238094 | 0.912039473 | 0.618534503 | 1           | 0.775732685 |             |   |
|         | 0.762223205                          | 1.021339178 | 0.819019356 | 0.734470296 | 0.940420177 |             |             |   |
| YDR276C | YDR276C::PMP3::plasma                | membrane    | protein     | involved    | in          | salt        | tolerance   | 1 |
|         | 1.468762392                          | 1.477738499 | 1.258977214 | 1.946775402 | 1           | 1.396684023 |             |   |
|         | 1.227136947                          | 1.547758703 | 1.649225059 | 1           | 1.276804892 | 1.603303083 |             |   |
|         | 1.99742047                           | 1.243284358 | 1           | 1.506440353 | 1.121762536 | 1.134143507 |             |   |
|         | 1.164438337                          | 1           | 1.64854311  | 2.18332839  | 0.981857159 | 1.04407297  | 1           |   |
|         | 0.979716117                          | 0.893350296 | 0.891285926 | 0.963017742 | 1.00098553  | 1           |             |   |
|         | 0.856633765                          | 1.2489891   | 1.241623866 | 1.1308312   | 1.345159597 |             |             |   |
|         | 0.751078451                          |             | 0.98430031  | 1.137619583 | 0.859969606 | 1.616401866 |             |   |

YDR278C YDR278C::YDR278C::molecular\_function unknown 0.796642707  
0.941802511 1.354074768 0.805691501 1.008536429 0.897378063  
1.352804617 1.204333276 0.707705999 1.190768816 0.92220761  
0.564944606 0.639088145 0.613383367 1 1.226839953  
1.002829425 1.139566438  
1.17218677 0.651086164 0.747622672 1.001141092  
0.931663945

YLR128W YLR128W::YLR128W::molecular\_function unknown 1 0.862753839  
1.07040235 1.212555856 1.229252985 1 1.002727038 1.200459967  
1.747394285 1.482069033 1 0.992650167 1.159869184 1.487189451  
1.531247693 1 0.470646139 0.941037554 0.886027368 0.808101948 1  
0.714451022 1.00339473 0.812824616 0.485807602 1 1.114288588  
1.53079211 1.437274565 1.342656516 1.209983768 1 1.393509172  
1.479940813 1.204054836 1 1.004057083 1.167174405 1.313101738  
0.756309889 0.851106531

YDR280W YDR280W::RRP45::Ribosomal RNA Processing 1 0.658046505  
0.776493905 0.727143411 0.970000198 1 0.721499422 0.675329327  
1.007869355 0.962997038 1 0.489428888 0.698684517 0.5775484  
0.883590235 1 0.524951485 0.390771662 0.366089514 0.729604976 1  
1.414266501 1.202184335 0.832977353 1.093818396 1 1.03804599  
1.004033203 0.923046017 1.039976911 1.043818139 1 1.011363134  
1.268878832 1.160256084 1.024969748 1.400003384 1 0.931041305  
1.18524284 1.057933363 1.546414713 0.97249397 1.099783781

YLR130C YLR130C::ZRT2::Low-affinity zinc transport protein 1  
1.233331705 0.88993312 1.646543021 1.359787448 1 1.048670211  
1.134936286 1.612965333 1.462155837 1 0.997965895 0.862389885  
1.033265607 1.617406283 1 1.590394594 1.081446585 1.33972621  
1.656040076 1 1.799483097 1.376738671 1.359167909 1.244025403 1  
1.337849881 0.985035284 1.109287532 1.375277739 1.042108012 1  
1.117420176 0.731793652 0.502655714 0.532617657 0.595513352 1  
1.039992468 0.826671569 0.791739815 0.957424984 0.727557287 0.601553668

YDR294C YDR294C::DPL1::dihydrosphingosine phosphate lyase (also known as  
sphingosine phosphate lyase) 1 0.856146695 0.840200885 1.064104112  
0.603849671 1 0.988302679 1.106886864 0.79711032 0.845647157 1  
0.954203225 1.122676309 0.908017404 0.882265941 1 1.85462656  
1.486164653 1.727486175 1.204616085 1 0.95404874 0.892591361  
0.994305816 0.813783408 1 1.041396341 1.060002614 1.44176702  
1.191637471 0.878911721 1 1.056986503 0.820209197 1.030814163  
0.927764933 0.626748452 1 1.065136158 0.846735911 1.214149839  
0.817612149 0.960910684 0.838847796

YLR132C YLR132C::YLR132C::molecular\_function unknown 1 0.79849705  
0.929582696 0.841104009 0.751421553 1 1.039605784 1.05409604  
0.854477224 0.742050779 1 0.860154364 1.203965299 0.795765923  
0.761149935 1 1.100686983 0.932449284 0.741465937 0.816156042 1  
1.432855871 0.967656263 1.104907307 0.950187871 1 1.158897105  
1.629224215 1.193702332 0.85966448 0.955362575 1 1.398194524  
1.462354185 1.165528705 0.944124808 1 1.372820872 1.333994727  
1.107411391 0.864495675 1.332747317 0.969315762

YDR296W YDR296W::MHR1::Involved in mitochondrial homologous DNA  
recombination. Binds to activation domains of acidic activators. Presence in RNA  
pol II holoenzyme may help recruit an Ssn3-active form of the holoenzyme to  
target promoters. 1 0.671563129 1.108264621 0.9701109 1.128174018 1  
0.886679569 1.096693155 1.215125821 1.365192868 1 0.905485226  
0.980489477 1.417342 1.066835222 1 1.404443038 0.997311881  
1.079773837 1.522821991 1 1.878814962 1.505579478 1.177131031  
1.384605986 1 1.307918534 1.483657574 1.290302818 1.067095537  
1.195955827 1 1.482721015 1.671157222 1.24899547 0.925250322

1.111665455 1 1.244706841 1.153003393 0.954194374 1.252302856  
1.231964478 1.626909427  
YLR134w YLR134w::PDC5::pyruvate decarboxylase 1 0.908248315  
0.562372697 0.582882904 0.45586856 1 0.974574944 0.937703574  
0.421338688 0.472296181 1 1.026780187 0.795471529 0.459082058  
0.489497195 1 0.977477882 0.970903375 1.482386107 0.773524026 1  
0.63051532 0.268452914 0.354554849 0.783492846 1 0.908264359  
0.768248292 1.266974119 1.660079268 0.959762566 1 1.008260124  
0.692610575 0.662328334 0.67965604 0.32763814 1 1.017078381  
0.866412446 1.285112838 0.700600174 1.053019251 0.892260903  
YDR298C YDR298C::ATP5::Subunit 5 of the mitochondrial ATP synthase complex;  
homologous to bovine OSCP and E. coli delta. 1 1.289285276 1.289614173  
0.964354181 1.902579842 1 1.24228951 1.196330063 1.299131108  
1.558024873 1 0.917228363 0.933250302 1.429820944 1.085739731 1  
1.176908119 0.815143717 0.921323492 1.486872613 1 1.483226561  
1.406877203 1.696189973 1.561364438 1 1.294128707 1.099551677  
0.767486893 0.968348459 1.013761306 1 0.913777731 0.786262823  
0.651824937 0.497303841 0.905784512 1 0.978440245 0.975178957  
0.585751878 1.430489791 1.293512149  
YLR136c "YLR136c::TIS11::Zinc finger containing homolog of mammalian TIS11,  
glucose repressible gene" 1 1.246408419 0.991070115 3.30014443 1  
0.744740722 1.042711702 3.234625046 1 11.60876273 11.80851287  
2.812965611 4.926609663 1 2.351388935 1.119120954 0.79743153  
1.278915017 1 2.597744569 0.924153888 0.980041543 1.444348294 1  
7.854231299 6.034275278 4.477105251 0.729239252 2.090128542 1  
18.65313925 14.13788963 14.80175449 4.08013438 0.925706593 1  
12.39473287 5.573455224 1.357843258 -0.530692957 0.832036349  
2.655767585  
YLR138W YLR138W::NHA1::Putative Na+/H+ antiporter 1 1.199474696  
0.885705648 1.495506529 0.830298107 1 1.095593435 1.258314113  
1.028987153 1.212640861 1 0.9814732 0.947525687 0.766876818  
1.121536656  
0.921889621 1 0.905908434 1.009641012 0.886442288 1.048418082  
0.850971027 1 0.954570124 0.838718193 0.867660819 0.872069764  
0.652912775 1 0.869397986 0.904126231 0.966612952 0.821471407  
0.752095577 0.675981741  
YLR152C YLR152C::YLR152C::molecular\_function unknown 1 1.756951606  
1.396269831 1.270344114 0.945751284 1 1.529193313 1.710773245  
1.048181071 1.000031429 1 2.319047345 1.638312332 1.208111862  
0.960246716 1 1.519539641 1.25964789 1.703634258 1.333108961  
0.958109457 0.608311169 1.304830761 0.856661579 1 1.208759777  
1.009652854 1.177301093 1.610641172 1.307048392 1 0.919570367  
0.677336376 1.385983817 1.367262356 0.789830418 1 0.806613889  
0.643811589 1.032425336 0.501484598 0.971523292 0.622568686  
YKL160W YKL160W::YKL160W::molecular\_function unknown 1 0.793722048  
1.055217862 0.797657419 1.407473147 1 0.832339557 0.883144546  
1.31616195 1.425828373 1 0.87688471 1.046462282 1.337759835  
1.030022205 1 0.89593664 0.979718984 1.209759879 1  
1.776336908 2.22847971 1.830353377 1.159518149 1 0.903425306  
1.144480026 0.785942799 0.763353713 0.939253418 1 1.219514759  
1.842248737 1.32169376 1.315928058 2.275868835 1 1.049018332  
1.310144165 0.949461179 1.418625603 1.147758505 1.366849055  
YLR154C YLR154C::YLR154C::molecular\_function unknown 1 0.757262311  
1.436668037 0.772496733 1.733129177 1 0.867543775 0.994698736  
1.300414352 1.314379322 1 0.89484598 0.79246657 1.02961917  
1.143637361 1 0.637918286 0.435734818 0.345781702 0.992250734 1  
1.014484974 0.740613865 0.982705529 1 0.754475897 0.790269947



0.54788269 0.62188234 0.879472066 1 1.014484617 1.230719349  
 1.679172885 2.041671637 1 0.989614996 1.27848381  
 1.248800801 1.199604884  
 YKL162C YKL162C::YKL162C::molecular\_function unknown 1 0.922049595  
 0.953249914 0.74579924 1 1.080868276 1  
 1.175982804 1.176217278 0.927626221 0.989622204 1 1.637048818  
 1.629654217 1.653863706 1.023861916 1 0.951266268 0.94218596  
 1.062452381 0.756871529 1 1.392876942 1.376938647 1.833196974  
 2.403174497 1.804610279 1 0.938064511 0.617067794 0.805627988  
 1.173843752 0.396871727 1 0.769045758 0.339153391 0.557601448  
 0.285793421 0.678371548  
 YLR156W YLR156W::YLR156W::molecular\_function unknown 1 1.58100091  
 1.194882283 1.575195675 1 1.233046932 1.340024299 1  
 1.83113294 1.752379562 1.999477735 1.491213866 1 0.635546687  
 0.744909732 0.875838283 0.61221028 1 0.743867023 0.841130892  
 1 0.950327789 1.054825722 0.992751499 0.87767473 1  
 0.825209595 1.036968847 0.954843099 1.111845988 1 1.000728453  
 1.045558343 0.881167848 1.140673602 0.937793286  
 YKL164C YKL164C::PIR1::Protein containing tandem internal repeats 1  
 1.754999297 1.126916621 1.980466261 1 1.275205809 1.432017165  
 1.7740274 1.619012122 1 1.178000336 1.205121181 1.197482273  
 0.620787568 0.317407063 0.379794802 0.517735396  
 1 1.035259831 0.856140093 1.01486601 0.959005031 1.118097848 1  
 1.056792984 1.165495911 1.089701774 0.781395156 1.225110051 1  
 1.641159438 3.215202664 1.296826134 1.583771764 1.298990701 1.306430994  
 YKL178C YKL178C::STE3::The a factor receptor encoded by the STE3 gene allows  
 yeast cells of the Alpha mating type to recognize cells of the a mating type 1  
 0.79604107 0.5999396 0.639406817 0.603908467 1 0.774139941  
 0.674317785 0.624205953 0.709999991 1 0.711582972 0.671290333  
 0.445954505 0.494855363 1 0.991665766 1.262661584 2.060003317 1  
 5.813040746 15.2562232 2.994245692 6.991110162 1 1.36864854  
 0.978458445 1.47666885 1.609656355 1.298133616 1  
 0.779217156 1 0.834628016 0.712796722 0.724375634  
 0.655120742 1.139186823  
 YKL180W "YKL180W::RPL17A::Homology to rat L17, human L17, and E. coli L22"  
 1 1.05938217 1.060853089 0.755811601 1.509525197 1 0.913607097  
 0.83602989 1.105261019 1.293400816 1 0.823977737 0.754574821  
 0.650950661 0.890885557 1 0.754237138 0.415947484 0.260520511  
 0.690775605 1 1.1433967 0.616732854 0.458429149 0.731027385 1  
 1.336459213 0.998020657 1.197905303 1.257937722 1.390420258 1  
 1.203185543 1.505053877 0.849930701 0.692881971 1.421653145 1  
 0.946963491 1.196061127 0.654168772 1.483861015 0.62717928 1.088400659  
 YKL182W "YKL182W::FAS1::pentafunctional enzyme consisting of the following  
 domains : acetyl transferase, enoyl reductase, dehydratase and malonyl/palmityl  
 transferase" 1 1.281094875 1.006954841 1.247492248 0.870146699 1  
 1.312950883 1.29408708 0.966077978 0.970803633 1 1.325563935  
 1.109072672 0.68703567 0.989132295 1 0.886444042 0.587272452  
 0.659162413 0.518515644 1 0.432902526 0.271717006 0.163778784 1  
 1.003268329 0.86233123 1.012573024 1.339217536 0.963098438 1  
 0.739224328 0.714041671 0.625446157 0.694430311 0.493597946 1  
 0.590483474 0.786468971 1.111514721 1.009700061 0.727575718 0.972818213  
 YKL184W YKL184W::SPE1::Rate limiting step of polyamine biosynthesis pathway  
 1 1.197637768 0.941990433 0.909663389 0.670129362 1 1.078708421  
 1.128199575 0.705642067 0.656313315 1 1.393048204 1.003792193  
 0.739605788 0.55856951 1 0.957810125 0.549263471 0.850487765  
 0.434861371 1 0.571393097 0.48807888 0.367091683 0.458458447 1  
 1.058684961 0.946248929 1.174380085 1.2287461 0.87359937 1

|         |                                                                                                                                                                               |             |             |             |             |             |             |   |
|---------|-------------------------------------------------------------------------------------------------------------------------------------------------------------------------------|-------------|-------------|-------------|-------------|-------------|-------------|---|
|         | 0.973539125                                                                                                                                                                   | 0.839197858 | 0.764693961 | 0.972731247 | 0.701766248 | 1           |             |   |
|         | 0.795963748                                                                                                                                                                   | 0.663164744 | 0.788469592 | 0.747661358 | 0.590535262 | 0.882629006 |             |   |
| YKL186C | YKL186C::MTR2::mRNA transport regulator                                                                                                                                       |             |             |             |             | 0.736309614 |             |   |
|         | 1.060239551                                                                                                                                                                   | 0.887807957 | 1.167909977 | 0.766390844 | 0.898476496 |             |             |   |
|         | 1.064323368                                                                                                                                                                   | 0.790894614 | 0.846173613 | 1.103126311 | 1.111152506 | 1           |             |   |
|         | 0.609934322                                                                                                                                                                   | 0.609201641 | 0.916080426 | 1.238426547 | 1           | 1.00472314  |             |   |
|         | 1.591735856                                                                                                                                                                   | 2.549522271 | 1.358621093 | 1           | 1.007702518 | 0.967741627 |             |   |
|         | 0.864701724                                                                                                                                                                   | 0.840132925 | 1.066305643 | 1           | 1.273872898 | 1.784484247 |             |   |
|         | 1.072698357                                                                                                                                                                   | 1.536882898 | 2.40872314  | 1           | 1.00360026  | 1.013096895 |             |   |
|         | 1.320147442                                                                                                                                                                   | 0.987115607 |             |             |             |             |             |   |
| YKL188C | YKL188C::PXA2::Homolog of the human adrenoleukodystrophy transporter; forms a heterodimer with Pxa1p of two half ATP-binding cassette transporters in the peroxisome membrane |             |             |             |             | 1           | 1.69515945  | 1 |
|         | 1.588143529                                                                                                                                                                   | 1           | 1.530208089 | 1.870116901 | 2.01752716  |             |             |   |
|         | 1.456211497                                                                                                                                                                   | 0.476526615 | 0.648347032 | 0.767120977 | 0.715155454 | 1           |             |   |
|         | 1.971845597                                                                                                                                                                   | 3.889984059 | 3.732127302 | 1.679661932 | 1           | 1.103429182 |             |   |
|         | 1.245282644                                                                                                                                                                   | 1.233814835 | 1.439548698 | 1.373800178 | 0.636863069 |             |             |   |
|         | 1.120880951                                                                                                                                                                   | 0.681548391 | 0.629969521 | 1           | 0.864145132 | 1.148015861 |             |   |
|         | 1.060497696                                                                                                                                                                   | 1.328022362 |             |             |             |             |             |   |
| YKL202W | YKL202W::YKL202W::molecular_function unknown                                                                                                                                  |             |             |             |             | 1           | 1.093847931 |   |
|         | 1.504696547                                                                                                                                                                   | 1.110635743 | 1.790088038 | 1           | 1.088445692 | 1.171225331 |             |   |
|         | 1.430445776                                                                                                                                                                   | 1.885543545 | 1           | 1.091869282 | 1.504286181 | 1.686763963 |             |   |
|         | 1.385819057                                                                                                                                                                   | 0.906517363 | 0.607748425 | 0.578837415 | 0.771542725 | 1           |             |   |
|         | 1.33391689                                                                                                                                                                    | 1.454497944 | 1.503178568 | 1           | 0.935028053 | 0.944984827 |             |   |
|         | 0.64962955                                                                                                                                                                    | 1.062720373 | 1           | 0.892671314 | 0.865758452 |             |             |   |
|         | 1.121619942                                                                                                                                                                   | 1           | 0.958167474 | 0.763309109 | 1.204845715 |             |             |   |
|         | 1.291761655                                                                                                                                                                   |             |             |             |             |             |             |   |
| YDR300C | YDR300C::PRO1::catalyzes first step in proline biosynthesis                                                                                                                   |             |             |             |             | 1           |             |   |
|         | 0.833826299                                                                                                                                                                   | 0.685911707 | 0.896784745 | 0.935624576 | 1           | 0.835961808 |             |   |
|         | 0.744680148                                                                                                                                                                   | 0.762890584 | 0.955067216 | 1           | 0.817393417 | 0.519058993 |             |   |
|         | 0.377441958                                                                                                                                                                   | 0.859264597 | 1           | 0.708512173 | 0.33905698  | 0.541505741 |             |   |
|         | 0.79503731                                                                                                                                                                    | 1           | 0.599118445 | 0.411954813 | 0.705337767 | 1           |             |   |
|         | 1.13300865                                                                                                                                                                    | 1.070917747 | 0.994447587 | 1.072578672 | 0.983444873 | 1           |             |   |
|         | 0.985266486                                                                                                                                                                   | 1.099874134 | 0.903159067 | 0.833043823 | 0.753488109 | 1           |             |   |
|         | 1.26511588                                                                                                                                                                    | 1.137009208 | 0.900965371 | 0.93839561  | 0.791546949 | 1.006967579 |             |   |
| YDR302W | YDR302W::GPI11::Glycosylphosphatidylinositol (GPI) assembly                                                                                                                   |             |             |             |             | 1           |             |   |
|         | 1.811364982                                                                                                                                                                   | 1.537980518 | 1.345038374 | 1.811483735 | 1           | 1.354573698 |             |   |
|         | 1.230623023                                                                                                                                                                   | 1.709491031 | 1.63398616  | 1           | 1.218768332 | 1.091062856 |             |   |
|         | 1.311111468                                                                                                                                                                   | 1.222698812 | 1           | 0.790835409 | 0.484960776 | 0.428827765 |             |   |
|         | 1.218296087                                                                                                                                                                   | 1           | 1.333024482 | 1.230551572 | 1.145254799 | 1           |             |   |
|         | 1.308973715                                                                                                                                                                   | 1.167223373 | 0.855204699 | 1.029076671 | 1.009766941 | 1           |             |   |
|         | 0.911895895                                                                                                                                                                   | 1.177488472 | 0.902946651 | 0.68337272  | 1.048303664 | 1           |             |   |
|         | 1.034678491                                                                                                                                                                   | 1.0802457   | 0.884679171 | 1.400668281 | 1.049542393 | 1.534093225 |             |   |
| YDR304C | "YDR304C::CPR5::Cyclophilin D, Peptidyl-prolyl cis-trans isomerase D"                                                                                                         |             |             |             |             | 1           | 1.426069266 |   |
|         | 1.465298339                                                                                                                                                                   | 1.70915902  | 1.921581815 | 1           | 1.360251384 | 1.500454451 |             |   |
|         | 2.048507895                                                                                                                                                                   | 1.583056826 | 1           | 1.039944553 | 0.822367049 | 0.913088213 |             |   |
|         | 1.291101547                                                                                                                                                                   | 1           | 1.337524299 | 1.623950794 | 1.909448248 | 1.451820177 | 1           |   |
|         | 1.334727373                                                                                                                                                                   | 1.169202179 | 1.185513215 | 1.1063491   | 1.148758122 | 1           |             |   |
|         | 1.10724586                                                                                                                                                                    | 1.605014292 | 1.469866164 | 0.660853828 | 1.09056642  | 1           |             |   |
|         | 1.245464966                                                                                                                                                                   | 1.549529123 | 1.133816468 | 1.453990511 | 1.236844709 | 1.821297853 |             |   |
| YDR318W | YDR318W::MCM21::Involved in minichromosome maintenance                                                                                                                        |             |             |             |             | 1           |             |   |
|         | 1.026719847                                                                                                                                                                   | 1.103261641 | 0.842768205 | 1.275131012 | 1           | 0.994838165 |             |   |
|         | 0.912553097                                                                                                                                                                   | 1.008071688 | 1.155092534 | 1           | 1.19978826  | 1.047225331 |             |   |
|         | 1.34545735                                                                                                                                                                    | 0.992119846 | 1           | 1.09149808  | 0.939770455 | 1.369770907 |             |   |
|         | 1.387281595                                                                                                                                                                   | 1           | 1.465627096 | 3.301433281 | 2.303652544 | 0.952804071 | 1           |   |
|         | 1.227031469                                                                                                                                                                   | 1.240223873 | 0.925547482 | 0.754160554 | 0.878969602 | 1           |             |   |

1.092812563 1.238447503 1.386066993 1.024490542 1.327974145 1  
1.318209027 1.531506547 1.179100058 1.468332423 1.68688779 1.571745042  
YDR320C YDR320C::SWA2::auxilin-like protein 1 0.766168867 0.851161289  
0.849942477 0.714383065 1 0.915180652 1.035299669 0.670818288  
0.719293445 1 0.88490093 0.898993386 0.765976614 0.814773374 1  
1.029032919 0.563591863 1.125319535 0.740468562 1 0.924423135  
1.065916181 1.025612973 0.969734661 1 1.076155236 0.968990112  
0.977815583 0.839899422 0.973674672 1 1.064501041 0.914420836  
1.115683418 1.16574695 0.635595501 1 0.72049385 0.583177073  
0.770876406 0.653008691 0.570575596 1.008718805  
YLR158C YLR158C::ASP3-3::nitrogen catabolite-regulated cell-wall L-  
asparaginase II 1 1.446698757 1.292540415 0.984578159 1.292387674 1  
1.374157128 1.306637398 1.408518051 1.386468181 1 1.321797189  
1.506251203 1.811992743 1.122874396 1 1.466638742 1.059874834  
1.192391615 1.166964878 1 1.591424519 1.8054294 1.661494701  
1.271775578  
  
YDR322W YDR322W::MRPL35::Mitochondrial ribosomal protein MRPL35 (YmL35) 1  
0.666359831 0.813115441 0.990639644 1.061266331 1 0.875685862  
1.05183163 0.806419453 0.996421905 1 0.603692349 0.655346985  
0.739788625 0.817010211 1 0.668550892 0.639322088 0.64637833  
0.839481478 1 1.182232817 1.553024914 0.786127262 1.215129655 1  
1.043759075 1.021862405 1.038692395 0.885674398 1.060285003 1  
1.200515745 1.274516903 1.297017322 0.926329356 1.052994946 1  
1.217787886 1.160134322 1.09420845 1.155724648 1.105983613 1.020101927  
YLR160C YLR160C::ASP3-4::nitrogen catabolite-regulated cell-wall L-  
asparaginase II 1 1.0478949 1.056679625 0.769647672 1.019183748 1  
0.859072959 0.889267171 1.17048836 1.074518841 1 1.141827988  
1.219836091 1.526026642 0.8905671 1 1.596043098 1.05485883  
1.406649352 1.188456036 1 2.420152527 2.215440977 2.462600061  
1.704087329 1 1.261569085 1.328114201 1.334749702 1.23174253  
0.905014699 1 0.933982449 1.378842801 1.264167738 0.936732438  
1.502237266 1 1.026863551 1.114329196 1.041727502 1.049794058  
1.330072903  
YDR324C YDR324C::UTP4::part of small (ribosomal) subunit (SSU) processosome  
(contains U3 snoRNA) 1 0.661057058 0.499387301 0.834873165 0.683385353 1  
0.75907325 0.688637245 0.688589426 0.807652534 1 0.368651403  
0.287695857 0.196663175 0.694421915 1 0.338973135 0.328427505  
0.459954911 1 0.379237487 0.644194764 0.336396838 0.835445471 1  
0.651737459 0.56503227 0.685569826 0.955915153 0.922517312 1  
0.592197658 0.503450054 0.47809318 0.715000296 0.576297391 1  
0.602019321 0.564729977 1.000333349 0.941946582 0.467724048 0.640081149  
YLR162W YLR162W::YLR162W::molecular\_function unknown 1 1.354127151  
1.216649155 4.644747456 0.481923017 1 2.59962862 1.578404768  
3.549937854 3.22620847 1 0.891518422 2.541404259 2.129675178  
4.01337286 1 0.25866975 0.811854309 0.973633428 0.395206534 1  
0.696256613 0.526261229 0.284970195 0.357083136 1 1.547947644  
1.899086813 2.579334584 3.518659302 2.267482466 1 0.808182655  
0.252276803 0.498331383 1.036896013 0.151040952 1 0.659883016  
0.278587552 0.711322702 0.243281243 0.687907393 0.338866483  
YDR326C YDR326C::YDR326C::molecular\_function unknown 1 0.97959835  
0.792900114 1.188044618 0.957292097 1 0.90362754 1.103474333  
0.734807335 0.708545148 1 1.103950822 0.87622816 0.475448256  
0.843990354 1 1.274854463 0.63687311 0.817157561 0.639201303  
1.265449543 0.70895085 0.742675217 0.829483254 1 1.082395332  
0.97212341 1.024536522 1.261525658 0.960955509 1 0.979080812

0.772929596 0.897209422 0.991524569 0.729466691 1 0.980118227  
 0.930059236 1.211272569 0.965980647 0.85492012 0.775802844  
 YKR061W YKR061W::KTR2::May be involved in extracellular matrix assembly;  
 involved in N-linked glycosylation of cell wall mannoproteins 1  
 0.765762533 0.755965925 0.829688745 0.890475285 1 0.75523093  
 0.690264527 0.898620324 1 1.390735139 1.257531095 0.863837658  
 1.059112969 1 1.416210314 1.085221452 1.247342104 1.748252224 1  
 2.363695046 2.033512106 1.311148009 1 1.512135953 1.999866573  
 1.8548949 0.967380086 1.135182515 1 2.15552005 3.587528479  
 2.914873237 2.798465934 0.942718335 1 1.757852749 2.280536051  
 1.180649674 0.989924829 0.810190017 1.074390646  
 YDR328C YDR328C::SKP1::Involved in kinetochore function and ubiquitin-  
 mediated proteolysis 1 0.788262587 1.173319167 1.038491902 1.048386608 1  
 0.966611573 0.974352952 1.451503183 1.405013878 1 0.7769926  
 1.139501334 1.537432632 1.319403786 1 1.261611091 1.038130924  
 1.117490758 1.630214838 1 1.622397555 1.493432086 1.823845229  
 1.237285448 1 1.153409032 1.631365299 1.776707811 1.373442932  
 1.275664328 1 1.102632367 1.781100942 1.660576751 1.256746281  
 1.130740447 1 1.144032498 1.183408013 1.381725487 1.13004419  
 1.197877748 1.058629408  
 YKR063C YKR063C::LAS1::May regulate expression of genes involved in bud  
 formation and morphogenesis 1 1.056406624 1.109195901 1.151522451  
 1.34472215 1 1.196577111 1.079251179 1.379712974 1.467678582 1  
 1.516192376 1.933148347 1.784248993 1.59995764 1 1.515468422  
 1.476049981 1.286569545 1.222474096 1 1.416825814 1.522295194  
 1.472119674 1.019869816 1 0.997331765 0.978710177 0.923649086  
 1.158046041 1 0.884226888 1.015099325 0.897897824 0.876876532 1  
 0.83569031 1.224597261 1.037327375 0.775612325 0.813749312 1.163704293  
 YDR342C YDR342C::HXT7::Hexose transporter 1 1.35502535 1.182825687  
 1.743337155 1.228156887 1 1.616400796 1.920178722 1.082390022  
 1.194364479 1 1.231116762 0.882575638 1.50828974 0.707204309 1  
 6.579644918 2.986831116 4.502727889 3.584571456 1 3.646628441  
 1.129204194 1.953534618 1.928065982 1 1.14901476 0.776413185  
 1.337068168 1.190702289 1.148919205 1 0.774722011 0.339402991  
 0.965844862 0.42254786 0.44209005 1 2.099120892 0.52102505  
 0.942625537 1.345588987 3.997867002 0.666349844  
 YKR065C YKR065C::YKR065C::molecular\_function unknown 1 1.252897968  
 1.021561923 0.940727034 1.06515858 1 0.914003868 0.91785513  
 0.995735924 1.084687209 1 1.203490531 1.127991218 1.404305624  
 0.997284846 1 1.403201309 1.333590837 1.356793432 1.782146094 1  
 1.645370697 1.476593518 1.891569383 1.577560893 1 1.426399404  
 1.34471139 1.282355249 1.054647668 0.933817509 1 1.255305153  
 1.88407297 1.151664534 0.925347214 1.471054756 1 1.074262863  
 1.455245331 0.868049867 1.156449194 0.981639422 1.642670665  
 YKR067W YKR067W::GPT2::Encodes a Glycerol-3-phosphate acyltransferase  
 0.953016124 0.858668781 0.675488608 1.063019209 1.179662269  
 0.702527707 1.481721695 1.344358336 1.027169523 1.061224068 1  
 1.374669776 1.313823092 1.4718949 0.754853708 1 1.731435926  
 1.54557767 1.35238621 0.969427564 1 1.123016957 1.257655766  
 1.215637818 1.029132858 1.102304619 1 1.014908101 0.873019892  
 1.084364582 0.87573901 0.641845214 1 1.272493239 1.194502596  
 1.002781951 0.695533116 1.240847397 0.865116491  
 YKR069W YKR069W::MET1::Methionine metabolism 1 1.364994962  
 1.309309931 0.880203644 1 1.021613472 1.406381648 1.239644978  
 1.118398715 1 1.528098478 1.905748317 0.797631124 1.690163788  
 0.699338874 1 1 1.073259869  
 0.923671458 0.696087981 1.079321294 1.067322192 1 1.022954351

|                                             |                                                                                                                                                                                                              |              |             |             |             |                         |
|---------------------------------------------|--------------------------------------------------------------------------------------------------------------------------------------------------------------------------------------------------------------|--------------|-------------|-------------|-------------|-------------------------|
|                                             | 0.837323943                                                                                                                                                                                                  | 0.9944449477 | 0.859406978 | 1           | 0.803837609 |                         |
|                                             | 0.737632618                                                                                                                                                                                                  | 0.633955951  | 0.852101421 | 1.046370726 |             |                         |
| YKL204W                                     | YKL204W::EAP1::Translation initiation factor eIF-4E associated                                                                                                                                               |              |             |             |             |                         |
| protein                                     | 1                                                                                                                                                                                                            | 0.664653182  | 1.062605066 | 0.664784646 | 0.64634259  | 1                       |
|                                             | 1.074644916                                                                                                                                                                                                  | 1.174721465  | 0.706302636 | 0.598921765 | 1           | 1.130024157             |
|                                             | 1.18645562                                                                                                                                                                                                   | 1.225181364  | 0.662844496 | 1           | 1.213379561 | 1.087862017             |
|                                             | 1                                                                                                                                                                                                            | 0.82994077   | 1.160384609 | 0.752461012 | 1           | 0.801693926             |
|                                             | 0.875968121                                                                                                                                                                                                  | 0.582038316  | 0.639671386 | 0.838124399 | 1           | 1.105988758             |
|                                             | 1.053485924                                                                                                                                                                                                  | 0.8302693    | 1.385115049 | 1           | 0.64517973  | 0.792260712             |
|                                             | 0.848674721                                                                                                                                                                                                  | 0.561895985  | 1.015254368 |             |             |                         |
| YKR071C                                     | YKR071C::DRE2::Protein required for cell viability 1                                                                                                                                                         |              |             |             |             |                         |
|                                             | 0.88453829                                                                                                                                                                                                   | 0.729628831  | 0.83800942  | 1.158475895 | 1           | 0.924762705             |
|                                             | 0.760177185                                                                                                                                                                                                  | 0.842565791  | 0.888616863 | 1           | 3.290057891 | 2.950891355             |
|                                             | 0.775227371                                                                                                                                                                                                  | 1.865301276  | 1           | 3.109390943 | 1.412414349 | 1.08449683 1            |
|                                             | 4.770847653                                                                                                                                                                                                  | 1.306714223  | 2.147183476 | 2.243415968 | 1           | 3.440863005             |
|                                             | 4.0987088                                                                                                                                                                                                    | 2.970556896  | 1.592714648 | 1.329890486 | 1           | 3.076513136             |
|                                             | 2.680217751                                                                                                                                                                                                  | 2.321800022  | 2.907335314 | 2.567067237 | 1           | 4.256101294             |
|                                             | 3.305961089                                                                                                                                                                                                  | 3.671897473  | 1.920835233 | 1.283418623 | 1.542849457 |                         |
| YKL206C                                     | YKL206C::YKL206C::molecular_function unknown 1 1.314808791                                                                                                                                                   |              |             |             |             |                         |
|                                             | 1.348438255                                                                                                                                                                                                  | 1.041173344  | 1.391749687 | 1           | 1.093359606 | 1.069068189             |
|                                             | 1.589175769                                                                                                                                                                                                  | 1.468673971  | 1           | 1.24429443  | 1.317258851 | 1.683679284             |
|                                             | 1.174195532                                                                                                                                                                                                  | 1            | 1.030346935 | 0.849044114 | 1.027768529 | 1.411185469 1           |
|                                             | 1.54265932                                                                                                                                                                                                   |              | 1.677623652 | 1.544220472 | 1           | 1.199789386 1.481702907 |
|                                             | 1.231652687                                                                                                                                                                                                  | 1.027514226  | 1.013056893 | 1           | 0.954233394 | 1.259359722             |
|                                             | 0.978992849                                                                                                                                                                                                  | 0.645229376  | 1.106888231 | 1           | 1.087918876 | 1.361900031             |
|                                             | 0.929938836                                                                                                                                                                                                  | 1.293929268  | 0.901531357 | 1.178589866 |             |                         |
| YKR085C                                     | YKR085C::MRPL20::22.3 kDa mitochondrial ribosomal large subunit                                                                                                                                              |              |             |             |             |                         |
| protein YmL20; homologous to L17 of E. coli | 1                                                                                                                                                                                                            | 0.764234088  | 1.107895679 |             |             |                         |
|                                             | 1.151151093                                                                                                                                                                                                  | 1.335455382  | 1           | 0.905035548 | 1.046326829 | 1.896854301             |
|                                             | 1.708600652                                                                                                                                                                                                  | 1            | 0.818261356 | 1.017579351 | 1           | 0.556770792             |
|                                             | 1.620185973                                                                                                                                                                                                  | 0.54195174   | 0.87042263  | 0.779991909 |             | 0.953483555             |
|                                             | 0.883839967                                                                                                                                                                                                  | 1            | 1.437972385 | 1.207613155 | 1.417654773 | 0.975533437             |
|                                             | 1.326458576                                                                                                                                                                                                  | 1            | 1.049983928 | 1.398819848 | 1.041888436 | 0.732555666             |
|                                             | 1.149643821                                                                                                                                                                                                  | 1            | 1.291836361 | 1.722674187 | 0.875142398 | 1.099410551             |
|                                             | 0.943479839                                                                                                                                                                                                  | 1.69608372   |             |             |             |                         |
| YKL208W                                     | YKL208W::CBT1::Subunit of complex involved in processing of the 3' end of cytochrome b pre-mRNA 1                                                                                                            |              |             |             |             |                         |
|                                             | 0.903249738                                                                                                                                                                                                  |              | 1.262480957 | 1           | 0.831876221 | 0.974803746             |
|                                             | 1.108806048                                                                                                                                                                                                  | 1.164251303  | 1           | 0.693804689 | 0.745774063 | 0.934240773             |
|                                             | 1.338419331                                                                                                                                                                                                  | 1            | 2.359291816 | 5.218163473 | 4.113707096 | 2.154862089 1           |
|                                             | 1.449324839                                                                                                                                                                                                  | 1.367482621  | 1.348584943 | 1.421160988 | 1.110119615 | 1                       |
|                                             | 0.987123404                                                                                                                                                                                                  | 1.452468737  | 1.035824284 | 0.892017725 | 0.988852482 | 1                       |
|                                             | 1.393010753                                                                                                                                                                                                  | 1.373863856  | 1.032415756 | 1.264142555 | 1.064186137 | 0.883504567             |
| YKL210W                                     | "YKL210W::UBA1::ubiquitin activating enzyme, similar to Uba2p" 1                                                                                                                                             |              |             |             |             |                         |
|                                             | 0.68983021                                                                                                                                                                                                   | 0.629218489  | 0.998221289 | 0.580124371 | 1           | 0.776186391             |
|                                             | 0.888696231                                                                                                                                                                                                  | 0.692026489  | 0.851812222 | 1           | 0.726306923 | 0.841667385             |
|                                             | 0.675226808                                                                                                                                                                                                  | 0.880871119  | 1           | 1.557144125 | 1.66052543  | 2.094794404             |
|                                             | 1.007376766                                                                                                                                                                                                  | 1            | 0.830860316 | 1.011534934 | 0.672735595 | 0.932608658 1           |
|                                             | 1.155776717                                                                                                                                                                                                  | 1.02268531   | 1.608178932 | 1.160512534 | 0.960282746 | 1                       |
|                                             | 0.988417131                                                                                                                                                                                                  | 0.847238545  | 1.227162618 | 1.005471759 | 0.291643121 | 1                       |
|                                             | 0.734575195                                                                                                                                                                                                  | 0.773668379  | 0.89657201  | 0.563471196 | 0.609763348 | 0.705752939             |
| YKL212W                                     | "YKL212W::SAC1::Inactivation of Sac1p leads to specific increase in cellular levels of phosphatidylinositol 4-phosphate, accompanied by changes in vacuole morphology and accumulation of lipid droplets." 1 |              |             |             |             |                         |
|                                             | 0.617672486                                                                                                                                                                                                  | 0.803824681  | 0.565400735 | 1           | 0.820434414 | 0.837156948             |
|                                             | 0.666671426                                                                                                                                                                                                  | 0.664481922  | 1           | 0.703647457 | 0.638778837 | 0.435446112             |
|                                             | 0.815676762                                                                                                                                                                                                  | 1            | 0.893548046 | 0.559114724 | 0.688481111 | 0.604382057 1           |

0.772539762 0.441106754 0.596602545 1.043197344 1 1.215359994  
 0.912986977 1.008418874 1.616528977 1.034736584 1 0.919316912  
 0.669021136 0.693282308 0.903031697 0.393468385 1 1.092982551  
 0.774075228 1.056582909 0.759163653 0.645302225 0.643583653  
 YKR001C YKR001C::VPS1::involved in vacuolar protein sorting and normal  
 organization of intracellular membranes; probably required for membrane-protein  
 retention in a late Golgi compartment 1 0.771883451 0.779056896  
 0.964571261 0.709812063 1 0.98734882 1.014595469 0.793747918  
 0.786312452 1 0.814512573 0.901813229 0.60700756 0.931552709 1  
 1.679313373 1.284925445 1.279908137 1.131785452 1 1.357570622  
 0.960058389 1.092350625 1 0.98722193 0.968072824 1.25333746  
 1.044552169 1.000789238 1 0.981672954 0.78940002 1.016105174  
 0.728628579 0.377842464 1 0.840366101 0.764896158 0.831753995  
 0.650659436 0.632461884 0.726767905  
 YKR003W YKR003W::OSH6::Oxysterol Binding Protein 1 0.7162065  
 0.87933549 0.888205222 0.91311071 1 0.903836511 0.998221444  
 0.981206164 0.905912064 1 0.81558983 1.076002044 1.010102856  
 1.010964639 1 2.468320625 1.457230993 2.051864615 1.444610059 1  
 1.749062422 1.792934668 1.578029999 1.909938629 1 1.153000209  
 1.449296166 1.239676975 1.265648691 1 1.277777652 1.285868717  
 1.425076082 1.044098823 0.863068772 1 1.542633335 1.320555499  
 1.125444795 1.049839459 1.054644297 1.316938451  
 YKR005C YKR005C::YKR005C::molecular\_function unknown 1 1.212486681  
 1.057542083 1.221190336 1.180195758 1 1.153222762 1.06194535  
 1.217765812 1.203839448 1 0.909485134 1.113529749 1.320890989  
 1.096085421 0.700829168 0.684024553 0.78218366 1  
 1.797703361 1.734126357 1.545751433 0.9004549 0.694902751  
 0.891107561 0.993233124 1 0.951788713 0.987391799  
 1 0.883162504 0.773118256 0.859449816 0.738618902 0.93253961  
 YKR007W YKR007W::YKR007W::molecular\_function unknown 1 0.647008322  
 1.205545434 0.883165909 1.27696431 1 0.748632189 0.94675125  
 1.235824163 1 0.862703457 1.170535058 1.681297326 1.087687753 1  
 1.214472878 0.787115331 0.712847405 1.384207388 1 1.779129952  
 2.046936403 2.296246541 1.538820661 1 1.214186885 1.357654271  
 1.365675467 0.822217323 1.273748915 1 1.636992419 1.67846163  
 1.626445866 1.694979279 1.299344747 1 1.20563026 1.210005134  
 1.23532782 1.085803301 1.071226014 1.58663072  
 YKR009C YKR009C::FOX2::peroxisomal multifunctional beta-oxidation protein 1  
 1.519506732 1.550407556 1.545115882 1.580567419 1 1.593109817  
 1.785449723 1.753860638 1.556327085 1 1.866915521 1.948815737  
 2.160400308 1.35897725 1 1.399558251 0.999107376 1.644291413  
 1.488170753 1 1.124769775 2.044653228 2.044079861  
 0.997462129 0.913958166 0.836549937 0.967615915 0.913812744 1  
 0.869794062 0.975367151 1.038863799 1 0.642756198  
 0.66626419 0.682691261 0.714973939 1.232878585  
 YDR344C YDR344C::YDR344C::molecular\_function unknown 1 1.237065471  
 1.252166978 1 1.612109682 1.344335333 1  
 1.470736455 1.855068213  
 0.330623439 0.761221082 0.91027661 0.938592874  
 0.933681465 0.855443562 1 0.726513948 0.70424111 0.854867578  
 0.828305304 0.720813577 1 0.79245041 1.048214156  
 1.077592185 0.603304945  
 YDR346C YDR346C::SGI1::mutant Suppressor of Growth Inhibition by  
 phosphorylated sphingoid bases 1 0.98527212 0.819230377 1.035324274  
 1.234398172 1 1.019925956 0.912461091 0.86628322 1.059342966 1  
 0.814238815 0.673495849 0.486956787 1.062096397 1 0.828731732  
 0.591134148 0.528701329 0.90080378 1 0.853401438 0.594983317

|             |                                                                                         |             |             |             |             |
|-------------|-----------------------------------------------------------------------------------------|-------------|-------------|-------------|-------------|
| 0.595590137 | 0.827582969                                                                             | 1           | 1.100269283 | 0.975032382 | 1.267394184 |
| 0.972119806 | 0.973512138                                                                             | 1           | 1.182611409 | 1.151724345 | 0.973042092 |
| 0.952500599 | 1.55423988                                                                              |             | 0.979469899 | 1.242588621 | 0.995769888 |
| 1.496786814 | 0.774090273                                                                             | 0.971066988 |             |             |             |
| YDR346C     | YDR346C::SGI1::mutant Suppressor of Growth Inhibition by phosphorylated sphingoid bases |             |             |             |             |
|             | 1                                                                                       | 1.876262352 | 1.817690401 | 1.770185625 |             |
| 2.038032684 | 1                                                                                       | 1.568867264 | 1.810162677 | 1.78569043  | 1.924805614 |
| 1.470628891 | 1.635302005                                                                             | 1.938825445 | 1.533546589 |             |             |
| 0.720857038 |                                                                                         |             |             | 1           | 1.006052945 |
| 0.872428763 | 1.035344214                                                                             | 0.878175475 | 1.169020747 | 1           | 1.216087808 |
| 0.970725773 | 1.031174334                                                                             | 0.800375966 | 0.759054682 | 1           | 0.847377371 |
| 0.761933313 | 1.098626714                                                                             | 1.009707739 |             |             |             |
| YDR348C     | YDR348C::YDR348C::molecular_function unknown                                            |             |             |             |             |
|             | 1                                                                                       | 1.675744093 |             |             |             |
| 1.544018318 | 2.000800341                                                                             | 2.01789078  | 1           | 1.510276699 | 1.407931733 |
| 1.370110888 | 1                                                                                       | 1.788108804 | 1.656085689 | 1.505869172 | 0.982625723 |
| 0.854132103 | 1.108327625                                                                             | 0.791156865 | 0.857357338 | 1           | 1.439506452 |
| 1.529597393 |                                                                                         | 1.699118312 | 1           | 1.269778797 | 1.209801533 |
| 0.987436764 | 1.434986352                                                                             | 0.823086558 |             |             |             |
| YDR350C     | YDR350C::TCM10::Product of gene unknown                                                 |             |             |             |             |
|             | 1                                                                                       | 0.77027303  |             |             |             |
| 0.826830069 | 1.051793617                                                                             | 0.748025144 | 1           | 0.938932472 | 1.032366577 |
| 0.935773738 | 0.827920263                                                                             | 1           | 0.953331393 | 0.997365506 | 0.756826583 |
| 0.932070374 | 1                                                                                       | 0.69875776  | 0.510338683 | 0.519742276 | 0.90425409  |
| 1.729029162 | 1.483881179                                                                             | 1.377955858 | 1           | 1.148516329 | 1.130799705 |
| 1.210566737 | 1.036701169                                                                             | 1.099373736 | 1           | 1.009215894 | 0.802265894 |
| 1.075093247 | 0.872772112                                                                             | 0.915506326 | 1           | 0.993253108 | 0.707996657 |
| 0.850181771 | 0.692542977                                                                             | 1.504775707 | 0.873872775 |             |             |
| YDR352W     | YDR352W::YDR352W::molecular_function unknown                                            |             |             |             |             |
|             | 1                                                                                       | 1.382043982 |             |             |             |
| 1.446742921 | 1.759297159                                                                             | 1.158718273 | 1           | 1.631105899 | 1.487564982 |
| 1.09514346  | 1.149247594                                                                             | 1           | 1.416708115 | 1.339198842 | 0.949237572 |
| 1.378791482 |                                                                                         |             |             |             |             |
| 1.090258609 | 1.102794879                                                                             | 1.412477744 | 1.106470322 | 1.036471043 | 1           |
| 0.978067223 | 0.955804091                                                                             | 0.903846503 | 0.771982467 | 0.62396342  | 1           |
| 1.210437511 | 1.0746801                                                                               | 1.177106285 | 0.894228042 | 0.934078018 | 0.817832829 |
| YKR087C     | YKR087C::YKR087C::molecular_function unknown                                            |             |             |             |             |
|             | 1                                                                                       | 1.051182365 |             |             |             |
| 1.199544987 | 0.945752071                                                                             | 1.03891075  | 1           | 1.091054497 | 0.912755445 |
| 1.026432496 | 1.068807998                                                                             | 1           | 0.90419388  | 0.882098209 | 2.057623689 |
| 0.779682649 | 0.85160516                                                                              |             | 0.619721829 | 0.844433617 | 1           |
| 1.597567757 | 1.427868249                                                                             | 1.658300156 | 1.063691863 | 1           | 0.965098562 |
| 0.869229853 | 0.884665017                                                                             | 0.836995684 | 0.998174953 | 1           | 0.883753563 |
| 0.772554647 | 0.721094995                                                                             | 0.869891436 | 1.102205995 | 1           | 0.960851685 |
| 1.016440026 | 1.040054728                                                                             | 1.2393734   | 1.054763144 | 1.191724213 |             |
| YDR366C     | YDR366C::YDR366C::molecular_function unknown                                            |             |             |             |             |
|             | 1                                                                                       | 1.277599996 |             |             |             |
| 1.568878632 | 1.203956138                                                                             | 1.713239994 | 1           | 1.125576678 | 0.936655261 |
| 1.737740249 | 1.417703914                                                                             | 1           | 1.327437825 | 1.364384053 | 1.955168564 |
| 1.194140715 | 1                                                                                       | 0.984646565 | 0.907275134 | 0.83066758  | 0.851457801 |
| 0.854263257 | 2.146830015                                                                             | 0.898501435 | 0.783567147 | 1           | 0.510966203 |
| 0.56560357  | 0.519268214                                                                             | 0.510693993 | 0.765947732 | 1           | 0.816572383 |
| 2.126856222 | 2.096062952                                                                             | 3.20338753  | 3.557198312 | 1           | 1.078249662 |
| 2.065644748 | 1.640254435                                                                             | 2.482277404 | 1.504389006 | 1.792402268 |             |
| YKR089C     | YKR089C::YKR089C::molecular_function unknown                                            |             |             |             |             |
|             | 1                                                                                       | 1.058866409 |             |             |             |
| 0.94659202  | 0.803400568                                                                             | 1           | 0.985470644 | 0.981428663 |             |
| 0.793498843 | 1                                                                                       | 1.292248417 | 1.022161338 | 0.935468434 | 0.977991276 |
| 1.150364922 |                                                                                         |             |             |             | 1           |
| 1.027677273 | 0.910429702                                                                             | 1.038385843 | 0.944887983 | 0.998423601 | 1           |
| 0.907663715 | 0.9800399                                                                               | 1.027610347 | 0.607591449 | 0.938514331 | 1           |
| 0.984855271 | 1.080022663                                                                             | 0.831554673 | 0.931368469 | 0.846188789 | 1.235505476 |

YDR368W YDR368W::YPR1::homologous to the aldo-keto reductase protein family  
1.148790806 0.929275471 1.005213242 0.894777641  
0.855937117 0.960888693 0.8006918 0.980426858 1.088635757  
1 0.990626674  
0.765478978 1.261889713 0.901561207 0.886948938 1 1.21967692  
0.795924578 1.078564272 1 1.098379097 0.901813631 0.721014914  
1.198245602

YKR091W YKR091W::SRL3::Suppressor of Rad53 null Lethality 1  
0.734801313 1.038465722 0.940311923 1.029583639 1 1.15188077  
1.095074995 0.931674355 0.946557749 1 0.826987168 1.22278608  
0.786170338 0.304517004 0.731542788 0.815536765 1  
1.841358413 1 0.882286967 0.932932815 0.871141146  
1.03527694 1 0.944974783 1.200951044 1.287631118 1.20006572  
1.588687553 1 0.839928175 0.852586778 0.977803288 0.924163431  
1.085334678 0.98770389

YDR370C YDR370C::YDR370C::molecular\_function unknown 1 0.87989875  
0.802941498 0.927204312 1.041306552 1 0.898848038 0.874573482  
1.096417079 1.016683533 1 0.61241269 0.677796616 0.637215702  
0.912118112 1 0.926975761 0.826604074 1.454625385 1  
1.381762047 1.78572213 1.261511135 1.293263389 1 0.810838081  
0.762909493 0.650782242 0.731185512 1.014929768 1 0.708022743  
0.838224425 0.677261238 0.870027181 1.142399924 1 0.873630481  
0.937320953 1.050683057 1.536283429

YKR093W YKR093W::PTR2::Functions in transport of small peptides into the  
cell 1 1.144002587 0.774628381 1.089266585 0.738370084 1 1.210632453  
1.197283372 0.906597682 1 1.420257032 1.108699545 1.224891528  
0.913791026 1 0.622592429 0.519546334 1  
0.185765903 1 0.634862596 0.449895431 0.976894011 1.165656862  
0.677174154 1 0.548870028 0.388803353 0.681490364 0.786717013  
0.287086201 1 0.612283211 0.403332492 0.918845686 0.551756283  
0.922273072 0.412418892

YDR372C YDR372C::VPS74 1.169722635 1.21853532 0.910170856  
0.989164742 0.908361938 0.992410037 0.95900611 0.855998694  
0.991080804 1.189600196 0.737178738 0.797673397 1  
1.037406226 0.785102039 0.730465688  
0.920107696 0.989405685 1 0.884860298 1.282330234 0.754229786  
0.920803793 1.478067465 1 0.890920395 1.237097193 0.979968974  
1.917009969 1.099553548 1.346709701

YKR095W YKR095W::MLP1::involved in translocation of macromolecules between  
the nucleoplasm and the NPC 1.078607396 0.805144346  
0.821487606 0.935464624 0.877700078 0.982619114  
1.310866258 1  
0.981856649 0.873358438 1.163207312 1.047127448 1.088457921 1  
0.785838887 1.154836826 0.642375095 0.788138049 0.745217532 1  
0.790245042 1.279966058 0.985473203 0.644266169 0.847015984 1.147943055

YKR095W YKR095W::MLP1::involved in translocation of macromolecules between  
the nucleoplasm and the NPC  
0.48962527  
0.579979498 3.082196463

YDR374C YDR374C::YDR374C::molecular\_function unknown 1 1.542299394  
1.566974276 1.714398704 1 1.618791315 1.821628075 1  
1.334563726 1.486193462 1.48175699 1.598684374  
1 1.225294317 1.33080921  
1.161905734 1.124701507 1 1.125796121 1.209357644 1.105524901  
0.974174424 0.979382562 1.121504399 0.934438024  
0.905850308 1.166331183



YLL003w YLL003w::SFI1::Product of gene unknown 1 0.81344673  
0.744032457 0.869480031 0.866810654 1 0.941472598 0.95447695  
0.986730295 0.727985836 1 0.79759946 1.047683961 0.701536306  
1.234492424 1 0.691986587 0.66503354 0.626036265 0.659460098 1  
1.885444595 2.669298823 1 0.67858973 0.701426965  
0.661656001 0.755125911 1 1.335061716 1.405592973 1.138960282  
1.330072778 1.010543383 1 0.949258776 1.240902084 0.919283016  
0.750790356 0.879083816 0.93253961  
YLL005C YLL005C::SPO75::Sporulation 1 0.944169736 0.728744226  
0.895652828 0.862586798 1 0.80962996 0.771079543 0.760818732  
0.798444332 1 0.903880376 0.877711096 0.922519813 0.930716  
1.191027935 0.303310401 1  
0.933798374 1.036471015 1.443908584 1.103576398 1.143655225 1  
0.749066809 0.812463059 0.889012013 0.782181832 0.472404424 1  
0.851438175 0.818692333 0.982452768 0.540927497 0.973897762 1.046370726  
YLL007C YLL007C::YLL007C::molecular\_function unknown 1 1.172094754  
1.019783128 1.026025165 1.093364708 1 0.868073664 1.142488248  
1.040943523 1 1.182370123 1.087652538 1.090399862 1  
1.057434073 1.13568103 1.017910835 1.450526602 1 1.783865711  
2.744829777 2.431247254 1.441581254 1 1.031568019 0.890335609  
1.080791212 0.964865643 1.009762101 1 0.95630824 1.056281159  
0.855581728 0.817425214 1.044878847 1 0.914305914 1.281203372  
0.919803618 0.83781701 0.879178095 1.281037964  
YKR011C YKR011C::TOS5::molecular\_function unknown 1 0.734235589  
1.271895937 0.820259534 1.11916983 1 0.857595729 0.97704541  
1.206257906 1.08582446 1 1.416690191 1.810889395 1.864640731  
1.003080506 1 1.258897789 1.144311869 1.322474934 1.690480817 1  
2.343959513 4.09622829 5.09098179 1.236400139 1 1.570025346  
2.456206803 1.822171671 0.879618487 1.332798508 1 2.680467887  
2.931236501 2.499172809 1.279199782 0.972655676 1 2.39951353  
2.359618525 1.353905921 1.248931285 1.714242991 1.677695592  
YLL009c YLL009c::COX17::Involved in copper metabolism and assembly of  
cytochrome oxidase 1 0.592864075 1.196239581 0.876758275 1.557637786 1  
0.664384577 0.870124693 1.338162181 1 0.791311349 1.19925036  
1.848303852 0.944082122 1 1.24512497 1.066067888 1.158577564  
1.982764983 1 2.384586341 3.676728745 3.389932787 1.912426672 1  
0.878454257 1.389416849 0.619894869 0.462500177 0.88922027 1  
1.639948962 3.25511557 1.6640654 1.700214415 3.289116994 1  
1.019016697 2.516681729 1.344912398 2.309712498 4.005191583 1.338829134  
YKR025W YKR025W::RPC37::RNA Polymerase C (III) 37 kDa subunit; interacts  
with C53 subunit. C37 is an RNA polymerase III specific subunit. 1  
1.088377707 0.919297005 0.852226587 1.093413112 1 0.816002226  
0.756079173 1.034006241 1.075024624 1 0.738592767 0.625668174  
0.789826643 0.992069831 1 0.477440697 0.60090521 0.296646329  
0.687500584 1 0.903300849 0.758369861 0.983050968 1  
0.886725661 0.913134956 0.688854413 0.791021102 1.006324647 1  
0.975057764 1.128967822 0.977010228 1.087931384 1.533482002 1  
0.874582126 0.971990964 0.901141697 1.206904857 0.633113605 1.302052878  
YLL011w YLL011w::SOF1::part of small (ribosomal) subunit (SSU) processosome  
(contains U3 snoRNA); 56 kDa nucleolar snRNP protein that shows homology to beta  
subunits of G-proteins and the splicing factor Prp4 1.031818505  
0.94066364 1.142745162 1.157141398 0.903203078 0.891886158  
1.444228244 1.400099374 0.600404731 0.466453212 0.466257821  
1.291286497 1 0.164687417 0.152600548 0.230857479 0.545729776 1  
0.434954215 0.499306641 0.438459644 0.863295118 1 0.632458093  
0.513184641 0.542079213 0.673437295 0.837275301 1 0.63210192

0.803001846 0.531521772 0.977951397 1.13103811 1 0.519883563  
 0.822089712 0.948709472 0.960412765 0.531118954 0.823086558  
 YKR027W YKR027W::YKR027W::molecular\_function unknown 1 0.905484864  
 0.909188935 0.712818561 1 1.030126887 0.953159121 0.673834723  
 0.629121588 1 0.797080508 0.835902611 1.132921352  
 1.505898516 0.856260935 1.094743905 1  
 0.864607789 1.080844599 1.105349326 1.077800946 1.116308328 1  
 1.008940528 0.948678505 1.331003291 1.070607875 0.75976347 1  
 1.115067969 0.982017042 1.082283991 0.814282625 0.559523735  
 YKR029C YKR029C::SET3 0.769554375 0.982799906 1.068055141  
 0.937103459 1.054446696 1.040781808 0.924719768 1.069351926  
 0.944201361 1.310866258 1 0.864258906 1.293636516 1  
 2.439715554 1.711742587 1.3901856 1.066487036 1 0.942668206  
 1.049150361 1.038826794 0.861318744 1.072431987 1 1.149148297  
 1.442282657 1.261117817 1.171495642 1.322680992 1 1.110276887  
 1.438133685 1.00385035 0.81956045 0.931052038 1.021853256  
 YKR031C "YKR031C::SPO14::Catalyzes the hydrolysis of phosphatidylcholine,  
 producing choline and phosphatidic acid. Dispensable for mitosis, premeiotic DNA  
 synthesis, recombination, meiosis I. Required for commitment to meiosis, meiosis  
 II and sporulation." 1 1.3847993 1.09504791 1.129590822 1.113900679 1  
 1.267713377 1.317679115 1.207824921 1.075686677 1 1.202113289  
 1.12211543 1.337995925 1 1.763401161 1.053833969 1.10242847 1  
 1.395954161 1.317538609 1.526031261 0.960941771 0.901072554  
 0.93051025 0.873569077 0.956872 1 1.690850368  
 2.243359165 1 1.410994767 1.069307176 0.493621621  
 1.052671324 1.540222567  
 YKR033C YKR033C::YKR033C::molecular\_function unknown  
 0.89397216 1.004422216 1.00830975  
 0.39183144 0.537741913  
 0.427674308 0.134804614 1 1.065435184 1.128777824 1.029956129  
 0.838959922 0.938593944 0.742282382 1.38063635 1  
 1.352999283 1.55627146 1.208693447  
 YKR035C YKR035C::YKR035C::molecular\_function unknown 1 0.782814484  
 0.941113893 0.886554183 0.920780577 1 0.693657007 0.752388272  
 0.961633309 1 0.929401682 1.044701115 1.063613654 1.070506221 1  
 1.292094144 0.924446045 1.024775431 1.246605905 1 1.869776168  
 1.275840494 1.801981064 1.958161525 1 0.967830077 1.23606283  
 0.920258679 0.677337271 1.019108359 1 1.304569069 1.932824743  
 1.392159217 1.276283172 2.007914663 1 1.505355251 1.660743799  
 1.192683455 1.119977081 1.342482408 1.633914433  
 YLR164W YLR164W::YLR164W::molecular\_function unknown 1 1.183438956  
 1.296369283 0.942162073 1.022495962 1 0.900821014 0.921641655  
 1.195744305 1.123990335 1 1.372426755 1.437410137 2.408132784  
 1.067323809 1 1.670601529 0.958370089 1.52387011 1.67820669 1  
 1.124312065 1.368540996 1.346583638 0.534009155 1 1.010300132  
 1.289077474 1.505775536 1.348753356 1.075518686 1 1.298341101  
 1.445642427 1.617026294 1 1.372052604 1.415096408  
 1.261724797 1.026609731 1.734535053 1.191724213  
 YLR166C "YLR166C::SEC10::100 kD component of the Exocyst complex; required  
 for exocytosis. The Exocyst complex contains the gene products encoded by SEC3,  
 SEC5, SEC6, SEC8, SEC10, SEC15 and EXO70." 1 0.596472607 0.626588396  
 0.765752969 0.66562411 1 0.745794705 0.736687229 0.726572883  
 0.583464145 1 0.614432662 0.674950357 0.452583577 0.76133068 1  
 1.015205375 1.028314867 0.848677711 0.783871491  
 0.439789753 0.837093159 1 0.982065417 1.126599357 1.085216055  
 1.037802344 1 0.954267245 1.055924052 1.19978961 0.880421926

1.047215976 1 1.235873829 1.132702824 1.37399905 1.240535831  
0.867743381  
YLR168C YLR168C::YLR168C::not yet annotated 1 0.767015616 1.174004721  
0.853060644 1.314624789 1 0.93216791 1.036769593 1.278478626  
1.147224078 1 0.644949065 0.700139083 1.024730527 0.842825781 1  
0.888495218 0.71555943 0.703324676 1.474632972 1 1.554403963  
1.11373744 1.825331816 1.896821402 1 0.689670616 0.70279995  
0.623955776 0.72519325 1.06683643 1 0.643428522 0.612567371  
0.722039542 1.358327893 1 0.686475904 0.833343271 0.693476768  
1.573684843 1.082271213  
YDR376W YDR376W::ARH1::adrenodoxin oxidoreductase homolog 1  
1.122368802 1.063366125 1.315859976 1.004488968 1 1.230970221  
1.265645351 1.24183927 1.187342392 1 1.000356521 1.117428163  
1.018764433 1.200148581 0.97352894 0.83167534 0.917324427  
0.912466687 0.783867692 1 0.779477289 1.000734945  
1.038683755 1.081894683 1.02378196 1 0.895227983 0.899194397  
1.045905948 1.069722914 0.824509323 1 1.107604887 1.016505307  
1.104347604 0.985538941 1.028363388 0.992957567  
YDR390C YDR390C::UBA2::Protein with homology to mammalian ubiquitin  
activating (E1) enzyme 1 1.104492632 1.028144949 1.183128349 1.094860571 1  
1.337217543 1.26532583 1.084118062 0.964966556 1 1.049342519  
0.984345567 0.616207855 1.285494736 1  
0.371573901 1 0.840061982 0.682844098  
0.851302651 0.830988243 1 0.823751639 0.630334153 0.466755132  
0.84940794 0.893828144 1 0.920140488 0.866100373 0.982231371  
0.961128824 1.202458347 0.858987149  
YBR231C YBR231C::AOR1::Actin Overexpression Resistant 1 1.273471248  
1.595115042 1.192013421 1.161407042 1 1.394504202 1.39875379  
1.450984387 1.433950373 1 1.245270194 1.614606826 1.775739138  
1.195272041 0.881388077 0.829523556 1 0.829150307  
1.202122547 1 0.936469217 1.160378204 1.377860193  
1.048431875 1.010370734 1 1.101669067 1.197572483 1.362135975  
1.366613331 1.067582082 1 1.076847599 1.010278872 0.937296058  
0.699551914 0.869494607  
YDR392W YDR392W::SPT3::Transcription factor 1 0.70017331 0.939682066  
0.915480625 0.934671109 1 0.780206316 0.836137393 1.072731781  
1.032545942 1 0.828643919 0.964479877 1.007959875 0.989198896 1  
1.273345853 1.33378563 1.19526759 1.665433315 1 1.718674104  
1.712534251 1.417522991 0.823156984 1 0.971496081 1.093004737  
0.882350251 0.759149423 1.087327797 1 1.601361325 2.050209177  
1.701495687 1.437131575 2.577565869 1 1.220659993 1.400347589  
1.114268155 1.365901899 1.420736802 1.506948866  
YBR233W YBR233W::PBP2::Overexpression confers resistance to the antimalarial  
drug mefloquine 1 0.958544621 1.154556274 1.120309053 0.977372176 1  
1.118096711 1.160558206 0.930699064 1 1.157811614 1.133934022  
0.991660943 0.977392143 1 0.902365785 0.802106195 1  
1.282626981 1.303142796 1.233221912 1.518414407 1 1.054788282  
1.047307133 1.063866522 0.761077431 1.054125625 1 0.995712763  
1.045867343 1.566851933 1.096550865 1 1.120364861 1.09932451  
1.152131652 0.978025626 1.272168605 0.866867768  
YDR394W YDR394W::RPT3::probable 26S protease subunit and member of the  
CDC48/PAS1/SEC18 family of ATPases 1 0.790154484 0.925002094 1.048645823  
0.885810389 1 0.965651731 1.050249275 0.952313753 0.854186941 1  
0.964903108 1.182997992 1.094860543 0.934293284 1 1.430401773  
1.471984641 2.021602976 1.335748653 1 1.085336038 0.91517125  
1.459300716 1.060907142 1 1.17411601 1.417556296 1.400857265  
0.89654441 1.014396162 1 1.270011939 1.20621033 1.27727118

|         |                                                                                          |             |             |             |             |             |             |             |
|---------|------------------------------------------------------------------------------------------|-------------|-------------|-------------|-------------|-------------|-------------|-------------|
|         | 0.907437945                                                                              | 0.829085194 | 1           | 1.165967099 | 1.080135304 | 0.942695997 |             |             |
|         | 0.763423458                                                                              | 1.053129512 | 0.931663945 |             |             |             |             |             |
| YBR235W | YBR235W::YBR235W::molecular_function unknown                                             |             |             |             |             |             | 1           | 1.568144975 |
|         | 1.115225193                                                                              | 1.949986584 | 1.0417237   | 1           | 1.657102913 | 1.54427267  |             |             |
|         | 1.079572582                                                                              | 1.125778908 | 1           | 1.681116394 | 1.451757184 | 0.824477624 |             |             |
|         | 1.43302848                                                                               | 1           | 0.904656469 |             | 0.942676052 | 0.650744349 | 1           |             |
|         | 0.936139005                                                                              | 1.255509322 |             | 1           | 1.181846631 | 1.092746047 |             |             |
|         | 1.177896759                                                                              | 1.375479916 | 1.000204591 | 1           | 0.808713196 | 0.575334999 |             |             |
|         | 1.16165621                                                                               | 0.794097485 | 0.469168098 | 1           | 0.892405796 | 0.777401192 |             |             |
|         | 0.920658984                                                                              | 0.725668986 | 0.827505851 | 0.714509171 |             |             |             |             |
| YDR396W | YDR396W::YDR396W::molecular_function unknown                                             |             |             |             |             |             | 1           | 1.194618492 |
|         | 1.481574813                                                                              | 1.188752722 | 2.024523783 | 1           | 1.168950908 | 1.098541214 |             |             |
|         | 1.702898264                                                                              | 1.705615319 | 1           | 1.002623584 | 1.04954064  | 1.647272702 |             |             |
|         | 1.457131835                                                                              | 1           | 0.926414554 | 0.840695089 | 0.646252968 | 1.057819454 | 1           |             |
|         | 2.437577246                                                                              | 1.357371756 |             | 1           | 0.787806187 | 0.892218111 | 0.616758482 |             |
|         | 0.561043071                                                                              | 0.854556513 | 1           | 1.019152909 | 1.440334018 | 1.587906284 |             |             |
|         | 1.257128388                                                                              | 2.180113165 | 1           | 1.055932946 | 1.296256421 | 1.037945934 |             |             |
|         | 1.610959802                                                                              | 1.267144912 | 1.617277531 |             |             |             |             |             |
| YBR237W | YBR237W::PRP5::RNA helicase homolog                                                      |             |             |             |             |             | 1           | 1.313621736 |
|         | 1.63655623                                                                               | 1.273054436 | 1           | 1.396569617 | 1.20422767  | 1.122839141 | 1           |             |
|         | 1.052858394                                                                              | 1.497753605 | 1.015720597 | 1.344990874 | 1           | 0.775032735 |             |             |
|         | 1                                                                                        | 1.104033615 |             | 1           | 0.893780497 | 0.998894013 |             |             |
|         | 0.974990655                                                                              | 0.84121381  | 1.100289255 | 1           | 1.085200845 | 0.903313209 |             |             |
|         | 1.270763894                                                                              | 1.214805496 | 1.09063155  | 1           | 0.970454931 | 0.908505529 |             |             |
|         | 1.175895606                                                                              | 0.935691616 | 1.299156976 | 0.983325775 |             |             |             |             |
| YDR398W | YDR398W::UTP5::part of small (ribosomal) subunit (SSU) processosome (contains U3 snoRNA) |             |             |             |             |             | 1           | 0.748180725 |
|         | 0.753792129                                                                              | 0.753864528 | 0.891556879 | 1.005729481 | 1           | 0.4474682   |             |             |
|         | 0.30191915                                                                               | 0.257412572 | 0.977716731 | 1           | 0.232545304 | 0.159459548 |             |             |
|         | 0.474632429                                                                              | 1           | 0.366877645 | 0.264468536 |             | 0.53808948  | 1           |             |
|         | 0.60670417                                                                               | 0.485460522 | 0.713793452 | 0.93328041  | 0.79290549  | 1           |             |             |
|         | 0.58090413                                                                               | 0.563461256 | 0.500181534 | 0.853519516 | 0.645529112 | 1           |             |             |
|         | 0.494045379                                                                              | 0.495849141 | 0.801876391 | 0.817002923 | 0.408889601 | 0.695245482 |             |             |
| YBR239C | YBR239C::YBR239C::molecular_function unknown                                             |             |             |             |             |             | 1           | 1.20062525  |
|         | 1.208978812                                                                              | 1.247835832 | 1.196565371 | 1           | 1.342178339 | 1.292294674 |             |             |
|         | 0.964699726                                                                              | 1           | 1.294809094 | 1.05359988  | 0.781306985 | 1.059871224 |             |             |
|         | 1.0470555                                                                                | 0.942379127 | 0.982302165 |             | 0.537845168 |             |             |             |
|         | 1                                                                                        | 0.894931568 | 0.879803393 | 0.766905294 | 0.821869727 | 0.863642548 | 1           |             |
|         | 0.906661707                                                                              | 0.688092993 | 0.96243097  | 0.981423808 | 0.964124271 | 1           |             |             |
|         | 0.737758327                                                                              | 0.762526413 | 1.028890499 | 0.920310926 | 0.859559247 | 0.605056171 |             |             |
| YDR400W | YDR400W::URH1::uridine nucleosidase (uridine ribohydrolase); EC 3.2.2.3                  |             |             |             |             |             | 1           | 1.263611646 |
|         | 1.044442087                                                                              | 1.084574769 | 0.99620775  | 1.056858914 | 1           | 0.964830734 |             |             |
|         | 0.75316632                                                                               | 0.688806448 | 1.281538949 | 1           | 0.718353638 | 0.493796622 |             |             |
|         | 0.512355692                                                                              | 0.893085273 |             | 1.066376982 |             | 0.874733327 | 0.834918919 |             |
|         | 0.933169483                                                                              | 0.796898556 | 0.846302258 | 1.234961737 | 0.950182622 | 1           |             |             |
|         | 0.862372285                                                                              | 0.856082511 | 0.734873899 | 0.952321253 | 0.984295538 | 1           |             |             |
|         | 0.915027555                                                                              | 0.832511997 | 0.876424399 | 1.202727791 | 0.963733735 | 0.84847964  |             |             |
| YBR241C | YBR241C::YBR241C::molecular_function unknown                                             |             |             |             |             |             | 1           | 1.132107511 |
|         | 1.072799758                                                                              | 1.065949219 | 0.736791525 | 1           | 1.321265989 | 1.424617834 |             |             |
|         | 0.756214754                                                                              | 0.966707759 | 1           | 1.612116339 | 2.032603406 | 1.81467275  |             |             |
|         | 1.075737545                                                                              | 1           | 1.676816525 | 1.747895645 | 1.690248084 | 1.353996597 | 1           |             |
|         | 1.069420375                                                                              | 1.628783546 | 0.803448203 |             | 0.854804504 | 0.773136816 |             |             |
|         |                                                                                          | 0.911899025 | 1           |             | 1.556209205 | 1.565673205 | 0.658365936 |             |
|         | 0.988560125                                                                              | 0.931584815 | 1.189710465 |             | 0.930555349 | 0.87299711  |             |             |
| YDR414C | YDR414C::ERD1::Protein required for retention of luminal ER proteins                     |             |             |             |             |             | 1           | 0.937824941 |
|         | 1                                                                                        | 1.174831869 | 0.907807107 | 0.874840312 | 1.15231845  | 1           |             |             |

|             |                                                                                                                                                               |             |             |             |             |
|-------------|---------------------------------------------------------------------------------------------------------------------------------------------------------------|-------------|-------------|-------------|-------------|
| 0.927021855 | 0.896453237                                                                                                                                                   | 0.871615608 | 1           | 1.114796753 | 0.769759697 |
| 0.697373482 | 0.751527381                                                                                                                                                   | 1           | 0.767603845 | 0.822962984 | 1.022215549 |
| 0.98443182  | 1                                                                                                                                                             | 0.797841429 | 0.889346516 | 0.941358614 | 0.841628573 |
| 0.992720499 | 0.944544414                                                                                                                                                   | 1.018039001 | 1.067112163 | 0.846081409 | 1           |
| 0.791338438 | 0.833887133                                                                                                                                                   | 0.680182517 | 0.577875176 | 0.954743968 | 1           |
| 0.851566247 | 0.878283998                                                                                                                                                   | 0.890035857 | 0.91114497  | 0.963348751 | 0.80732532  |
| YBR255W     | YBR255W::YBR255W::molecular_function                                                                                                                          | unknown     | 1           | 1.07045372  |             |
| 1.109491857 | 1.155018191                                                                                                                                                   | 0.928092869 | 1           | 1.187168245 | 1.367282365 |
| 0.992114049 | 0.865383734                                                                                                                                                   | 1           | 1.364238441 | 1.284494101 | 1.077199637 |
| 1.098539517 | 1                                                                                                                                                             | 1.026697458 | 1.027951394 | 1.193755745 | 0.886919873 |
| 0.490472972 | 0.642227136                                                                                                                                                   | 0.493578566 | 0.398965694 | 1           | 1.065267546 |
| 1.177738805 | 0.977382938                                                                                                                                                   | 0.886462652 | 1.028298457 | 1           | 1.204179521 |
| 1.177706788 | 1.369159277                                                                                                                                                   | 1.34862057  | 1.19619244  | 1           | 1.151258582 |
| 1.222001891 | 1.269988642                                                                                                                                                   | 0.898833212 | 1.309576113 | 0.783683463 |             |
| YDR416W     | YDR416W::SYF1::SYnthetic lethal with cdcForty                                                                                                                 | 1           | 0.971156406 |             |             |
| 0.852395352 | 1.200888812                                                                                                                                                   | 0.831675342 | 1           | 1.068624236 | 1.138408536 |
| 0.814005484 | 0.916320128                                                                                                                                                   | 1           | 0.945530697 | 0.921275914 | 0.761801886 |
| 0.967389531 | 1                                                                                                                                                             |             |             |             | 1           |
| 0.99288817  | 1.053017356                                                                                                                                                   | 1.141540302 | 1.154529397 | 1.196738033 | 1           |
| 1.102015854 | 0.776024696                                                                                                                                                   | 0.953166662 | 1.238323908 | 0.870519468 | 1           |
| 0.748022679 | 0.937226086                                                                                                                                                   | 0.83081297  | 0.701374823 |             |             |
| YBR257W     | YBR257W::POP4::Required for normal 5.8S rRNA processing and for tRNA processing; associated with RNase MRP and RNase P                                        | 1           | 1.023876207 |             |             |
| 1.189167821 | 1.228808693                                                                                                                                                   | 1.619396052 | 1           | 1.071535006 | 1.084001975 |
| 1.275575254 | 1.306428778                                                                                                                                                   | 1           | 0.944201892 | 1.112562701 | 1.133922071 |
| 1.239193656 | 1                                                                                                                                                             | 0.839573383 | 0.872208103 | 1.437369823 | 1           |
| 1.861937428 | 2.563628638                                                                                                                                                   | 1.697743806 | 1.453429988 | 1           | 0.715526108 |
| 0.49532901  | 0.844013616                                                                                                                                                   | 1           | 0.994615352 | 0.726917169 | 0.836224202 |
| 1.533017618 | 0.819255014                                                                                                                                                   | 0.841707533 | 1.043588709 |             |             |
| 1.299425988 |                                                                                                                                                               |             |             |             |             |
| YDR418W     | YDR418W::RPL12B::Homology to rat L12(a) and E. coli L11                                                                                                       |             |             |             |             |
| 1.067525809 | 1.043157298                                                                                                                                                   | 0.969432564 | 1.071971083 | 0.832980892 |             |
| 0.89953289  | 0.746286229                                                                                                                                                   | 0.919156092 | 0.837861831 | 0.801791997 |             |
| 0.503359429 |                                                                                                                                                               |             |             | 1           |             |
| 0.554843255 | 0.571796662                                                                                                                                                   | 0.617118225 | 1.178203936 | 1           | 1.635022098 |
| 2.032182809 | 1.544514043                                                                                                                                                   | 1.161810642 | 1.857413205 | 1           | 1.174040442 |
| 1.31150071  | 1.001562228                                                                                                                                                   | 1.719897329 | 1.171621051 | 1.226749244 |             |
| YBR259W     | YBR259W::YBR259W::molecular_function                                                                                                                          | unknown     | 1           | 1.20474671  |             |
| 1.347594731 | 1.290825609                                                                                                                                                   | 1.54673078  | 1           | 1.259365944 | 1.177128127 |
| 1.419971582 | 1.399455385                                                                                                                                                   | 1           | 1.135309067 | 1.197448719 | 1.433442606 |
| 1.303754953 | 1                                                                                                                                                             | 1.010344318 | 0.6521319   | 0.823582233 | 1.218128292 |
| 1.264528609 | 1.646394486                                                                                                                                                   | 1.235104788 | 0.855236923 | 1           | 0.893805244 |
| 0.944964418 | 0.634913111                                                                                                                                                   | 0.73876612  | 0.838091605 | 1           | 1.00965171  |
| 1.163647805 | 1.027510415                                                                                                                                                   | 0.752550645 | 1.36466373  | 1           | 1.061087282 |
| 1.555195405 | 1.068188434                                                                                                                                                   | 1.639922752 | 1.172749237 | 1.070888195 |             |
| YBR261C     | YBR261C::YBR261C::molecular_function                                                                                                                          | unknown     | 1           | 1.298418096 |             |
| 1.530345759 | 1.260371409                                                                                                                                                   | 1.464811561 | 1           | 1.223253188 | 1.205223696 |
| 1.478409078 | 1                                                                                                                                                             | 1.425989705 | 1.585655299 | 1.267247462 | 1.449495642 |
| 1.304216886 | 1.162472983                                                                                                                                                   | 1.310741383 | 0.869616137 | 1           | 1.035286674 |
| 0.803808046 | 0.483966748                                                                                                                                                   | 0.664243807 | 1           | 1.131251555 | 1.233222529 |
| 1.053927064 | 1.271213146                                                                                                                                                   | 0.972435687 | 1           | 1.062224065 | 1.305586261 |
| 1.327578927 | 1.460219032                                                                                                                                                   | 1.317041891 | 1           | 0.820607072 | 0.876517665 |
| 0.942480348 | 0.817727329                                                                                                                                                   | 0.803411282 | 0.690867314 |             |             |
| YDR420W     | YDR420W::HKR1::cell surface protein that may regulate cell wall beta-glucan synthesis and bud site selection; Hanenula mrakii killer toxin-resistance protein | 1           | 1.031715986 | 0.823895512 | 1.137747123 |
| 1.129795074 | 1.236006992                                                                                                                                                   | 0.639789476 | 0.623127379 | 1           | 1.086766227 |

|             |                                                                                                                                                                                         |             |             |             |             |
|-------------|-----------------------------------------------------------------------------------------------------------------------------------------------------------------------------------------|-------------|-------------|-------------|-------------|
| 0.88274426  | 0.560357337                                                                                                                                                                             | 0.764696932 | 1           |             | 0.280793549 |
|             |                                                                                                                                                                                         | 1           | 0.95376212  | 0.876873651 | 0.954102541 |
| 1.266040397 | 0.825655695                                                                                                                                                                             | 1           | 0.768018682 | 0.75746489  | 0.522443855 |
| 0.767591696 | 0.593184715                                                                                                                                                                             | 1           | 0.848774217 | 0.754281307 | 1.081979373 |
| 0.65259094  | 0.824536382                                                                                                                                                                             | 0.816957217 |             |             |             |
| YDR422C     | YDR422C::SIP1::SNF1 protein kinase substrate                                                                                                                                            | 1           |             |             | 1.779906975 |
| 1.553362922 | 1.596686174                                                                                                                                                                             | 1.454300826 | 1           | 1.428803554 | 1.477130962 |
| 1.868734099 | 1                                                                                                                                                                                       | 1.228071926 | 1.373393821 | 1.823780873 | 1.537300912 |
|             |                                                                                                                                                                                         |             |             | 1           | 0.928473563 |
| 0.995541912 |                                                                                                                                                                                         | 0.97724415  | 1           | 1.177700102 | 0.943730324 |
| 0.842923823 | 1.182033884                                                                                                                                                                             |             | 0.720398988 | 0.887359476 | 0.912354625 |
| 0.525648076 | 1.423479135                                                                                                                                                                             | 0.867743381 |             |             |             |
| YBR263W     | "YBR263W::SHM1::Serine hydroxymethyltransferase, mitochondrial"                                                                                                                         |             |             |             | 1           |
| 1.16334434  | 0.876550883                                                                                                                                                                             | 1.243146121 | 0.932923014 | 1           | 1.204320759 |
| 1.250248223 | 0.768927151                                                                                                                                                                             | 0.991525748 | 1           | 1.218891436 | 1.097348854 |
| 0.674585974 | 1.11733774                                                                                                                                                                              | 1           | 0.771428151 | 0.576234981 | 0.51123258  |
| 0.774712321 | 1.06521283                                                                                                                                                                              | 0.676522516 | 0.447058983 | 1.037125832 | 1           |
| 0.933771572 | 0.803136298                                                                                                                                                                             | 0.877940117 | 1.280645581 | 0.717663676 | 1           |
| 0.883763232 | 0.512180801                                                                                                                                                                             | 0.788482761 | 0.832440558 | 0.44367866  | 1           |
| 0.810016028 | 0.566776997                                                                                                                                                                             | 0.785572162 | 0.535499954 | 0.571566434 | 0.654966775 |
| YDR424C     | YDR424C::DYN2::putative light chain of dynein                                                                                                                                           | 1           |             |             | 1.352526941 |
| 1.170156335 | 1.365021085                                                                                                                                                                             | 1.159189897 | 1           | 1.36993076  | 1.428226049 |
| 1.226917926 | 1.065481818                                                                                                                                                                             | 1           | 1.091331736 | 1.036363939 | 0.741875265 |
| 1.323275861 | 1                                                                                                                                                                                       | 1.024010409 | 0.873508124 | 1           |             |
| 0.592618566 |                                                                                                                                                                                         | 1           | 1.005054274 | 0.834205911 | 0.822840367 |
| 0.830841894 | 0.973186525                                                                                                                                                                             | 1           | 0.869636504 | 1.016771108 | 0.673604507 |
| 0.924385709 | 0.829431547                                                                                                                                                                             | 1           | 0.996168404 | 0.913443069 | 1.095577896 |
| 1.121963644 | 0.925786865                                                                                                                                                                             | 0.841474686 |             |             |             |
| YBR265W     | YBR265W::TSC10::catalyzes the second step in the synthesis of phytosphingosine                                                                                                          | 1           |             |             | 1.668767089 |
| 1.649513096 | 1.514015269                                                                                                                                                                             | 1.169547803 | 1.620702572 | 1           | 1.093118871 |
| 1.143367301 | 1.341674838                                                                                                                                                                             | 1.343181427 | 1           | 0.638977246 | 0.497958274 |
| 0.697214069 | 1                                                                                                                                                                                       | 0.754530734 | 1.156388538 | 1           | 1.090144558 |
| 0.905197239 | 1.139916318                                                                                                                                                                             | 0.907342687 | 1           | 0.848561751 | 0.759688887 |
| 0.731803478 | 0.746182129                                                                                                                                                                             | 0.831864837 | 1           | 0.945630747 | 0.964368349 |
| 1.106005583 | 1.116092667                                                                                                                                                                             | 1.225873579 |             |             |             |
| YDR438W     | YDR438W::YDR438W::molecular_function unknown                                                                                                                                            | 1           |             |             | 1.379228691 |
| 1.07657246  | 1.084329662                                                                                                                                                                             | 1.014373528 | 1           | 1.002665383 | 1.073744847 |
| 1.115398794 | 1.143472733                                                                                                                                                                             | 1           | 1.014928889 | 0.870784408 | 1.229086776 |
| 0.969458851 | 1                                                                                                                                                                                       | 1.246361334 | 0.497110958 | 1.454756137 | 1           |
| 1.429637206 | 1.847009583                                                                                                                                                                             | 1.331203144 | 1.151567812 | 1           | 1.153368359 |
| 1.148648254 | 1.08682026                                                                                                                                                                              | 1.193483002 | 0.948813728 | 1           | 0.854707407 |
| 0.836744744 | 0.909711309                                                                                                                                                                             | 0.701733234 | 1.168001089 |             | 0.822663798 |
| 0.881652973 | 0.79244515                                                                                                                                                                              | 0.861692934 | 1.027022547 | 0.871245884 |             |
| YBR279W     | "YBR279W::PAF1::RNA polymerase II-associated, nuclear protein that may serve as both a positive and negative regulator of a subset of genes, perhaps operating in parallel with Gal11p" | 1           |             |             | 1.793289118 |
| 2.116536603 | 1.866798321                                                                                                                                                                             | 1           | 2.421775187 | 1.809941385 | 1.874081061 |
| 2.116888177 | 1                                                                                                                                                                                       | 2.960308319 | 3.080991493 | 2.282890764 | 1.537797967 |
|             |                                                                                                                                                                                         |             |             | 1           | 0.998116221 |
| 0.922477742 |                                                                                                                                                                                         | 0.849829069 | 1           | 1.016447024 | 1.100812991 |
| 1.180838828 | 1.247995534                                                                                                                                                                             | 0.815470134 | 1           |             | 0.807600253 |
| 0.743807675 | 1.267027951                                                                                                                                                                             |             |             |             |             |
| YDR440W     | YDR440W::DOT1::involved in meiosis and transcriptional silencing                                                                                                                        |             |             |             | 1           |
| 1.219852449 | 1.119822401                                                                                                                                                                             | 1.300656034 | 1.238885902 | 1           | 1.120413839 |
| 1.10848357  | 1.288185068                                                                                                                                                                             | 1           | 1.008733635 | 1.085691498 | 1.153394059 |
| 1.123102616 | 1                                                                                                                                                                                       | 1.273865386 | 0.992713459 | 1           |             |

|         |                                                                                        |             |             |             |             |             |   |
|---------|----------------------------------------------------------------------------------------|-------------|-------------|-------------|-------------|-------------|---|
|         | 1                                                                                      | 1.11574612  | 0.953813281 | 0.825310301 | 0.88363379  | 1.126733056 | 1 |
|         | 0.924579178                                                                            | 1.322021854 | 0.779388626 | 0.883251485 | 1.10498285  | 1           |   |
|         | 1.017092451                                                                            | 1.03936669  | 0.928325819 | 1.377956609 | 1.062901647 | 1.020977592 |   |
| YBR281C | YBR281C::YBR281C::molecular_function                                                   | unknown     | 1           | 1.255479796 |             |             |   |
|         | 1.138970079                                                                            | 1.501515977 | 1.017308509 | 1           | 1.572679989 | 1.49775013  |   |
|         | 0.947002447                                                                            | 1.062380019 | 1           | 1.261671195 | 1.248788765 | 0.789600055 |   |
|         | 1.186884198                                                                            | 1           | 0.579620084 | 0.956467029 | 0.740227513 | 0.415296937 | 1 |
|         | 0.45037511                                                                             | 0.626152573 | 0.411347212 | 0.463194026 | 1           | 1.137164714 |   |
|         | 0.992355406                                                                            | 0.963473106 | 1.064710529 | 0.988918543 | 1           | 1.178394286 |   |
|         | 0.766567171                                                                            | 0.881345071 | 0.902315319 | 0.610018898 | 1           | 1.118898124 |   |
|         | 0.927701236                                                                            | 0.991058169 | 0.883314991 | 1.000834416 | 1.812541622 |             |   |
| YDR442W | YDR442W::YDR442W::molecular_function                                                   | unknown     | 1.023199461 |             |             |             |   |
|         | 0.993049272                                                                            | 0.937006347 | 0.847787151 | 0.966160917 | 1.175268798 |             |   |
|         | 1.009634792                                                                            | 1.097777008 | 1.004291461 | 1.070409567 | 1.355536521 |             |   |
|         | 0.909480801                                                                            | 1           | 0.821507318 | 0.764739158 | 1.577012778 | 0.969667506 | 1 |
|         | 0.985354451                                                                            | 1.057501634 | 0.695092754 | 0.584306016 | 1           | 1.257912573 |   |
|         | 1.001433106                                                                            | 1.422008147 | 1.466098706 | 1           | 0.834178541 | 0.726667767 |   |
|         | 0.843885019                                                                            | 0.967180451 | 0.378732958 | 1           | 0.835127609 | 0.744520627 |   |
|         | 0.877859779                                                                            | 0.654481622 | 0.9895101   | 0.721514177 |             |             |   |
| YBR283C | YBR283C::SSH1::SEC61 homolog involved in co-translational pathway of protein transport | 1           | 1.261615317 | 0.748932766 | 1.172427085 | 0.799584549 | 1 |
|         | 1.310706788                                                                            | 1.142611289 | 0.710493916 | 0.758991893 | 1           | 1.204278854 |   |
|         | 1.043882628                                                                            | 0.606198477 | 0.88064149  | 1           | 0.921536669 | 0.698969925 |   |
|         | 0.745993992                                                                            | 0.677190446 | 1           | 0.526604112 | 0.345342762 | 0.346154503 |   |
|         | 0.522582548                                                                            | 1           | 1.016332341 | 0.799548537 | 1.137533569 | 1.238277691 |   |
|         | 0.663281882                                                                            | 1           | 0.927600023 | 0.768915857 | 0.983246156 | 0.582994291 |   |
|         | 0.465680532                                                                            | 1           | 0.909590064 | 0.795680932 | 0.781611637 | 0.696490129 |   |
|         | 0.654520317                                                                            | 0.668101122 |             |             |             |             |   |
| YDR444W | YDR444W::YDR444W::molecular_function                                                   | unknown     | 1           | 0.787082286 |             |             |   |
|         | 0.876518592                                                                            | 0.925322546 | 0.833825119 | 1           | 0.909902713 | 0.95071476  |   |
|         | 1.102210968                                                                            | 0.94508365  | 1           | 0.734231465 | 0.819579437 | 0.551156598 |   |
|         | 1.183954354                                                                            | 1           | 1.069769379 | 0.794062571 | 1.338872422 | 0.921763742 | 1 |
|         | 1.077947202                                                                            | 1.745938174 | 1.360857651 | 0.616469917 | 1           | 1.373741691 |   |
|         | 1.429392716                                                                            | 1.715376799 | 2.29635529  | 1.953038127 | 1           | 0.754436637 |   |
|         | 0.353433977                                                                            | 0.547934964 | 1.070140541 | 0.248692426 | 1           | 0.529395489 |   |
|         | 0.299884485                                                                            | 0.556945506 | 0.289571758 | 0.626073818 | 0.401035796 |             |   |
| YBR285W | YBR285W::YBR285W::molecular_function                                                   | unknown     | 1           | 1.687338445 |             |             |   |
|         | 3.238757203                                                                            | 3.198428165 | 4.83690926  | 1           | 2.133925669 | 2.715720392 |   |
|         | 4.161968675                                                                            | 4.444317175 | 1           | 1.448146866 | 3.366113213 | 11.06500165 |   |
|         | 4.182375176                                                                            | 1           | 2.820825303 | 2.725065304 | 3.400371262 | 4.747818866 | 1 |
|         | 2.754388561                                                                            | 4.890493559 | 8.469135048 | 2.289585873 |             | 0.905019953 |   |
|         | 1.155103251                                                                            | 1.007295001 | 0.84642154  | 0.926252091 |             | 0.841180866 |   |
|         | 0.972403804                                                                            | 1.48801089  | 1.404961415 |             |             | 0.947277636 |   |
|         | 0.930080392                                                                            | 1.5281813   |             |             |             |             |   |
| YDR446W | YDR446W::ECM11::ExtraCellular Mutant                                                   | 1           |             |             |             |             |   |
|         | 1.395270514                                                                            | 1           | 1.370608147 | 1.747266297 | 1           |             |   |
|         | 1.234712406                                                                            | 1.525634135 | 1.247471723 | 1           | 0.944913759 |             |   |
|         | 2.387263911                                                                            | 1.33095365  | 1           | 0.747958932 | 0.613656627 | 0.691075305 | 1 |
|         | 0.923712467                                                                            | 0.831881128 | 0.957539416 | 0.956165645 | 1.050843867 | 1           |   |
|         | 0.970666988                                                                            | 0.871517876 | 0.783418764 | 0.640061055 | 1           | 0.999822584 |   |
|         | 0.795925576                                                                            | 1.115873583 | 0.747200849 | 0.727241066 | 1.253017939 |             |   |
| YBR287W | YBR287W::YBR287W::molecular_function                                                   | unknown     | 1           | 1.401427426 |             |             |   |
|         | 1.139820848                                                                            | 1.654304714 | 1.163235405 | 1           | 1.555135984 | 1.48412149  |   |
|         | 1.332330974                                                                            | 1           | 1.409356414 | 1.385743738 | 1.378022974 | 1.046430772 | 1 |
|         | 1.819321444                                                                            | 1.192258141 | 1.673474934 | 0.638422832 | 1           | 0.724370312 |   |
|         | 0.657211686                                                                            | 0.381102794 | 0.488205759 | 1           | 1.300001662 | 1.255164922 |   |
|         | 1.065395075                                                                            | 1.306706083 | 0.786897574 | 1           | 0.862333051 | 0.747119739 |   |

1.087545929 0.700782812 0.539091491 1 1.082548634 0.648693355  
0.724649392 0.582488302 0.849641078 0.742529143  
YDR448W "YDR448W::ADA2::transcription factor, member of ADA and SAGA, two  
transcriptional adaptor/HAT (histone acetyltransferase) complexes" 1  
0.813445406 1.065653982 1.223944457 1.050735654 1 1.107142027  
1.177838589 1.232154875 1.262644037 1 0.821022106 1.00000935  
0.920298169 1.357069837 1 0.460770499 0.405650975 0.534712366  
0.5516832 1 0.735865552 0.628240243 0.458801346 1  
0.829590115 0.940757006 0.735961977 0.745664797 0.826156841 1  
0.767478611 0.767211201 0.83418542 1.159836266 0.729665983 1  
0.935001965 1.106552252 1.047646449 1.165992877 0.950553965 0.672479238  
YBR289W YBR289W::SNF5::Involved in global regulation of transcription 1  
1.045810454 1.177150145 1.377211259 1.127344699 1 1.211289114  
1.240967316 0.950969601 1.087841402 1 1.173068825 1.30157068  
1.187882386 1 0.888476632 0.992872369 1.110186249 0.948193103 1  
0.721575906 0.862885945 0.369292225 0.852521943  
0.90615781 1 0.981963971 0.968722554 0.795569144 0.952760235 1  
1.194644634 1.221615387 1.298154178 1.209425081 1.093654335  
YDR462W YDR462W::MRPL28::Mitochondrial ribosomal protein MRPL28 (YmL28) 1  
1.676020594 1.360455012 1.418539363 1.536816884 1 1.601181878  
1.454452915 1.462462372 1.5447925 1 1.237417171 1.582132207  
1.443181153 1.355655003 0.79855431 0.762761206 0.531497551 1  
0.547974561 1 1.053010721 0.910193952 1.191666864  
1.063583877 1.017424633 1 0.867241137 0.935013736 0.698632188  
0.825808454 0.629126206 1 1.130803018 0.96925346 1.149639396  
0.958790767 0.873068731 1.569118256  
YCL001w "YCL001w::RER1::Protein involved in retention of membrane proteins,  
including Sec12p, in the ER; localized to Golgi, where it may function in  
returning membrane proteins to the ER" 1 1.63311825 1.464118854  
1.257064502 2.08439989 1 1.318666134 1.227136883 1.465419837  
1.512955684 1 1.280964799 1.236633539 1.395755489 1.314971348 1  
0.914956362 0.626333166 0.515339259 0.874181014 1 1.141660113  
1.067213401 1.285313778 1.034538947 1 1.311244894 1.246677966  
1.007153901 1.191147001 1.074380229 1 0.849604691 1.012441163  
1.024379909 0.787456093 0.812411133 1 1.213394364 1.182739975  
0.918988034 1.433991469 1.151917607 1.31080911  
YCL003w YCL003w 1 1.57889391 1.492695624 1.652982613 1.473600552 1  
1.695646302 1.516938364 1.274773824 1.497975232 1 1.444950911  
1.523435152 1 1.825239979 1.695404453 1 1.559926458  
1.813933147 0.998603375 1.017043123  
1.017154901 1 1.012207363 0.903078967 0.891222762  
0.874932498 0.807468596 0.923824203 0.64742578 1.065844695 1.024480042  
YOR237W YOR237W::HES1::Protein implicated in ergosterol biosynthesis 1  
0.912951304 1.188223729 0.97543055 1 1.237701935  
0.806935802 0.880353033 1 1.120107107 0.87751457 0.680208226  
1.199540405 1 1.935998527 1.420680796 0.981992999  
1 0.836210894 0.948984935 1.251520797 2.034780017  
1.360232798 1 0.57924373 0.576580871 1.164889903 0.760608141 1  
1.130803041 0.93512477 1.008983242 1.207707578 0.985016608 0.65934489  
YOR251C YOR251C::YOR251C::not yet annotated 1 1.590399957 1.402544959  
1.481383669 1.62201637 1 1.427941543 1.524659812 1.667429237  
1.510288213 1 1.414306971 1.210690283 1.392995188 1.509063302 1  
0.630448961 0.518834501 0.607190317 1 1.061716849 0.879601872  
0.945670402 1 1.172935491 1.123649099 1.24056843 1.156263443  
1.242522526 1 1.019802935 0.942864651 0.718087773 0.95390781  
0.817050583 1 0.950486344 0.855012317 0.823747439 1.080712816  
0.745596304 0.948300744



YOR253W      YOR253W::ARD2            1            1.163267143 1.229021397 0.971812546  
1.53364509 1            0.985420738 0.825416538 1.504686015 1.310393572 1  
0.949432409 0.888818226 0.988980634 1.152901639 1            0.823056584  
0.638890665 0.530171131 0.903602911 1                            1.035287422 1.17126665  
1.604295708 1            0.807628568 0.938585486 0.657225978 0.652578192  
0.88798591 1            0.821651838 1.105819021                    0.753611847 1.263400517 1  
1.365945397 1.512371855 1.013249579 1.847891763 1.018234242 1.305555433  
YOR255W      YOR255W::YOR255W::molecular\_function unknown    1  
0.995070928 0.671795433 0.805966236 1            0.91791345 1.044138123  
0.863202649 1            0.827585746 1.045731534 0.944099342 0.833206997 1  
0.777259817 0.705724422 1.054441841 0.882312987 1            0.465105086  
1.341969042 0.794261389 0.516499407 1            0.98443765 0.890673872  
1.176955876 1.095839423 1.028621695 1            1.015788819 1.146560802  
0.722606078 1.014501125 0.7434188 1            0.785859587 0.994062703  
1.038997051 1.08848666 1.050277749 0.890509573  
YOR257W      "YOR257W::CDC31::Required for spindle pole body duplication and  
mitosis in meiosis II; calcium-binding protein component of spindle pole bodies,  
localizes to half-bridges and interacts with KAR1"            0.669820164  
1.247005743 0.731267466                            0.720383195 0.78863827 1.33425482  
1.143620971            0.793305847 0.998484854 1.528484291 0.935913455 1  
1.168688405 0.8059941            0.856355766 1.19937759 1            2.438273838  
3.487571672 2.662483284 1.011970272 1            0.901039119 1.325772362  
0.664398462 0.582910311 0.998746163 1            1.267172349 1.981145313  
1.455966472 2.051343934 2.404769137 1            0.934536562 1.321512848  
0.976919145 1.609265414 1.135886229 1.501695189  
YOR259C      YOR259C::RPT4::Proteasome Cap Subunit            0.801567865  
0.833614768 1.111437144 0.803733529            1.009747142 1.025888805  
0.973860319 0.877230413                            0.765576309 1.001658027 0.78410779  
0.91731267 1                            1.30011063 1.222209038 1.037812101 1  
1.331718002 0.631462031 0.99634368 1.50794169 1            0.916193761  
1.391472348 1.24803905 0.803397989 0.931140426 1            1.083139567  
1.503332602 1.07965266 0.864547384 0.943611307 1            1.176164314  
1.396074828 1.076020149 0.995436881 0.832339069 1.14969428  
YOR261C      "YOR261C::RPN8::Regulatory Particle Non-ATPase, homolog of mammalian  
proteasomal subunit S12/p40" 1            0.82464192 0.993665877 0.967885584  
1.217367381 1            0.918669748 0.895360794 1.135127558 0.954850374 1  
0.789569221 1.15205772 1.20458775 0.995608004 1            1.806545549  
1.866794009 1.94494809 2.677027374 1            1.527603035 1.740771126  
2.465071221 1.525268847 1            0.833561576 1.279385976 0.905934762  
0.562066071 0.932727537 1            1.164777859 1.895601646 0.992346135  
0.884893605 1.402403404 1            1.518782999 2.270908933 1.265411105  
1.531255541 1.452732001 1.630411878  
YOR275C      YOR275C::RIM20::Regulator of IME2            1            1.095281384 1.035638507  
1.438672444 1.107980734 1            1.400732386 1.403065201 1.127761969  
0.964394867 1            1.126721532 1.213907846 0.839943757 1.374960862 1  
0.991530182 1.257736972 0.978107788 1            0.93953785 0.736888887  
0.648058022 0.923844181 1            0.902281614 1.052182063 0.951429218  
0.821469782 0.941541384 1            1.061436795 1.031509565 0.809801592  
0.888328274 0.723385603 1            1.329511518 1.102887423 1.22513745  
0.975706595 1.041045107 0.98245011  
YNR031C      YNR031C::SSK2::Suppressor of Sensor Kinase (SLN1)    1  
0.782071639 0.778508378 1.146565131 0.773746722 1            0.922164177  
1.05338007 0.847525619 0.696950486 1            1.157317574 1.006789892  
0.808279608 0.94853982 1            1.065387488                    1.270489072 0.531309953 1  
0.714067676 1.027255998                    0.594536781 1            1.0488014 1.064791618  
1.172116221 1.085847996 1.015514947 1            1.304893669 0.927803495

0.910725669 0.950198473 0.569216559 1 1.104105025 1.046901552  
 1.055431391 0.623143544 1.069088073 0.87825089  
 YOR277C YOR277C::YOR277C::molecular\_function unknown 1 1.256002075  
 1.513499186 0.966242719 1.806074607 1 1.0250752 0.91875207  
 1.639268266 1.560009358 1 0.920617179 1.014211202 1.168181664  
 1.219767244 1 1.238067978 0.619715735 0.510392744 1.358647882 1  
 1.347585931 1.317359118 0.945315287 0.870567236 1 1.085114462  
 1.055433321 0.802276926 0.919323282 0.976448653 1 1.09855378  
 1.292551455 0.74315745 0.197927508 1.713007051 1 1.102843605  
 1.410650522 0.95380953 1.657689591 1.064086031 1.138311158  
 YNR033W "YNR033W::ABZ1::para-aminobenzoate synthase, PABA synthase" 1  
 0.94068217 0.942206471 1.10225086 0.704832888 1 1.040064603  
 0.993826169 0.981940846 0.819000669 1 1.087683472 0.987753942  
 0.852651739 0.984890509 1 1.144443037 0.985242289 1.301489945  
 0.994435765 1 1.389688963 1.313651981 1.304972456 1.237520898 1  
 0.925269195 0.89132754 1.085213717 0.832094254 0.85806958 1  
 1.000078523 0.920581899 0.93014949 0.799572929 0.619117431 1  
 1.035264001 0.863108346 0.621483822 0.707718139 0.799444701  
 YOR279C YOR279C::RFM1::Repression Factor of MSE 0.754778901  
 1.109208706 0.966078169 1.190426266 0.846852552 1.425678447  
 1.240265084 0.742669308 0.81444207 1.360210864 1.188492633 1  
 0.885728812 0.779788817 0.849041154 1.445416784 1 1.364787161  
 2.661897779 1.428216865 0.828411381 1 0.949978158 1.077731864  
 0.931296219 0.951128827 1.200621125 1 0.992938365 1.286138375  
 0.765823236 0.891576594 1.242361327 1 0.842478296 1.136836888  
 1.00188715 1.48828755 1.018982749 1.336202244  
 YNR035C YNR035C::ARC35::Arp complex subunit 1 0.997175273 1.145915011  
 1.061016783 1.182083845 1 1.079463869 1.232495624 1.425351791  
 1.218034535 1 0.977868754 1.143002918 1.500810121 1.167779384 1  
 1.42906374 1.289064453 1.692257037 1.497326501 1 1.128295105  
 1.154498021 1.58340479 1.444144138 1 1.089332585 1.226698652  
 0.979675315 0.799313439 0.775875279 1 0.967550336 1.36399865  
 1.11817285 0.854048492 1.124771713 1 1.438651248 1.629770394  
 1.293433636 1.283378173 1.443598323 1.194351103  
 YNR037C YNR037C::RSM19::mitochondrial ribosome small subunit component 1  
 0.930681625 1.773690339 1.192755807 1.716284601 1 1.087089215  
 1.362329906 2.063634598 2.09595303 1 1.126270759 1.407030094  
 2.470952434 1.532483499 1 1.377020612 0.956088555 1.199018919  
 1.602011525 1 2.349594984 3.082797099 3.50252135 1.726145113 1  
 1.080869887 1.404583367 1.369698875 1.120380395 1.158160827 1  
 1.063328442 1.606755815 1.251368668 1.270236186 1.537323488 1  
 0.88284699 1.367792123 1.172325881 1.287760757 1.411804043 1.470172714  
 YNR051C YNR051C::BRE5::protein of unknown function 1 0.665653443  
 0.762002269 0.847642914 0.680353143 1 0.824847916 0.76668215  
 0.8895888 0.787600499 1 0.792957938 0.755990972 0.669952279  
 0.792769102 1 0.424449895 0.431117428 0.515825541 0.500619061 1  
 0.631983809 0.716470242 0.830739243 0.720993819 1 0.82829117  
 0.925739917 0.814411352 0.70998645 0.625228416 1 0.948428872  
 0.935540853 0.786275567 0.99109947 0.753601302 1 0.976563481  
 1.028837227 1.109374142 0.804082399 0.87080825 0.811703436  
 YDR464W YDR464W::SPP41::appears to control expression of spliceosome  
 components PRP4 and PRP3 1 1.370964858 1.496874803 1.730661708  
 1.621549172 1 1.403016952 1.361837035 1.445222383 1.522158724 1  
 1.561247894 1.535987969 1.528400169 1.899250627 0.959568213  
 1 0.95879386 0.956712181  
 1.023660122 0.814540566 0.925770725 1  
 0.911889994 0.98104873 0.730575012 0.891385238

YNR053C YNR053C::NOG2::Nuclear/Nucleolar GTP-binding protein 2 1  
0.726748977 0.61608756 1.1029178 0.623905963 1 0.810188541  
0.735804895 1.134212271 1.380080054 1 0.310836707 0.280361318  
0.31058956 1.047190838 1 0.18974931 0.174855414 0.493423871 1  
0.336019411 0.194455733 0.725811069 1 0.52612627 0.5034059  
0.671790086 1.044339984 0.80280043 1 0.388974921 0.399477419  
0.316835837 0.741684415 0.709077342 1 0.441411774 0.595255677  
1.034311218 0.961079044 0.466413594 0.720638564  
YDR466W YDR466W::YDR466W::molecular\_function unknown 1  
1.532772507 1.548244779 1 1.629558535 1.478348368  
1.448875146 1 1.204420287 1.479315567 1.748372535 1.476863484  
0.87312525 1 0.98489034  
0.937134222 1.104594927 1.14189641 1 0.864372362  
1.711393142 1 1.043012792 1.309528705 1.034712492 1.898621083  
1.146825452 1.451784585  
YCL005W YCL005W::YCL005W::molecular\_function unknown 1 1.906991251  
1.54948656 1.7821132 1.371355997 1 1.688219044 1.331949862  
1.557721531 1 1.558956315 1.583734153 1.360676606 1.495769011 1  
0.852553671 1.565424445 1.438903636 0.747863195 1 0.586909219  
0.337946448 0.320042538 0.4701944 1 1.112026944 1.089689856  
0.872891695 1.173671101 1.012564265 1 0.803412346 0.92264371  
0.855958201 0.878410861 1.041356153 1 0.757854315 0.73129667  
0.849645288 0.740377171 0.885142443 0.864240878  
YNR055C YNR055C::HOL1::Putative ion transporter similar to the major  
facilitator superfamily of transporters 1 0.837127521 0.840264725  
0.502659293 1 0.881723092 1.000414072 0.688013426 0.749678361 1  
0.943337926 0.685689108 0.537445563 0.676330513 1 0.923988911  
0.803315815 0.956617104 0.625153012 1 1.244647377 0.824981194  
0.621271157 1 1.201232145 1.03036421 1.015265908 1.336092473  
0.89557128 1 0.724281177 0.576983969 0.587800589 0.441184294  
0.464591809 1 0.839919997 0.659992786 0.751342347 0.713133239  
0.859650903 0.809076598  
YDR468C YDR468C::TLG1::member of the syntaxin family of t-SNAREs 1  
0.605095242 0.946290114 0.792172719 1.061602305 1 0.72074725  
0.733898248 1.14308805 0.964249215 1 0.650427923 0.846105158  
1.005429015 0.859012356 1 0.992257808 0.639458198 0.588962915  
1.144630431 1 1.223222209 2.259506475 1.721814736 0.99827598 1  
0.834662541 1.304834752 0.866265291 0.790566894 1.050192811 1  
0.925591023 1.281562781 1.157219157 1.161536226 1.666148744 1  
0.935196065 1.102372272 1.297752352 1.222159712 1.324756932 1.215366122  
YCL007c YCL007c::CWH36::calcofluor white hypersensitivity 1  
1.190974168 1.765974579 1.043809324 1.902092213 1 1.126831997 1.366631  
1 1.211924003 1.436485395 2.009251566 1.1795415 1  
1.192392371 0.697642369 0.813483934 1.121091108 1 1.639064108  
1.764190664 1.224279352 1.320012953 1 0.904252631 0.957782741  
0.935771845 1.190658983 1.140145629 1 0.931793044 1.220104249  
1.302093083 1.122695938 1.337265968 1 0.72731419 1.095245837  
0.973600654 0.97337233 0.89865126 1.101535006  
YNR057C YNR057C::BIO4::dethiobiotin synthetase 0.951784853  
1.060239551 0.839727632 1.125814327 0.751862078 0.886394254  
1.08118366 1.216723524 0.858409999 0.966753311 1.016652426 1  
0.387667616 0.531154018 1  
0.973162456 1.033901526 0.887083173 1.20142627 0.993835597 1  
0.813910085 0.927801119 0.820605315 0.750941829 1 0.912430691  
0.871326168 0.906185328 0.902897088 1.109579187 0.837096518  
YDR470C YDR470C::UGO1::outer membrane protein required for for mitochondrial  
fusion 1 1.183147632 1.263150151 1.23122487 1.112855035 1

|             |                                                                                                                                                                              |             |             |             |             |
|-------------|------------------------------------------------------------------------------------------------------------------------------------------------------------------------------|-------------|-------------|-------------|-------------|
| 1.241323005 | 1.243549273                                                                                                                                                                  | 1.267085765 | 1.166373593 | 1           | 1.139095017 |
| 1.154958657 | 1.26928283                                                                                                                                                                   | 1.157888017 | 1           |             | 1.096313189 |
| 0.861163995 | 1                                                                                                                                                                            | 1.478689813 | 1.8747292   |             | 1.428808336 |
| 1.11490524  | 1.105269542                                                                                                                                                                  | 1.049369079 | 1.034017301 | 1.296174198 | 1           |
| 0.818670444 | 1.131695247                                                                                                                                                                  | 0.768555773 | 0.874611372 | 1.327853213 | 1           |
| 0.910539196 | 1.077250722                                                                                                                                                                  | 0.97373263  | 1.252672158 | 0.854486825 | 1.714471744 |
| YCL009C     | YCL009C::ILV6::acetolactate synthase regulatory subunit                                                                                                                      |             |             |             | 1           |
| 1.246980037 | 0.814328063                                                                                                                                                                  | 0.584690195 | 0.386247684 | 1           | 1.065976512 |
| 0.980037191 | 0.423637677                                                                                                                                                                  | 0.52202759  | 1           | 1.94543159  | 1.780054328 |
| 1.07854957  | 0.41786532                                                                                                                                                                   | 1           | 0.838812448 | 0.748194388 | 0.607049875 |
| 0.739128169 | 1                                                                                                                                                                            | 0.773184699 | 0.399587801 | 0.231149156 | 0.417629782 |
| 1.11311378  | 0.972071089                                                                                                                                                                  | 1.067044359 | 1.200451665 | 0.827839885 | 1           |
| 0.834479974 | 0.709508253                                                                                                                                                                  | 0.797848963 | 0.78149438  | 0.714408028 | 1           |
| 0.887839149 | 0.65913808                                                                                                                                                                   | 0.964946915 | 0.562720433 | 0.975441507 | 0.725892293 |
| YNR059W     | YNR059W::MNT4::MaNnosylTransferase                                                                                                                                           |             |             |             | 1           |
| 0.746354636 | 0.679275393                                                                                                                                                                  | 1           | 0.785226164 | 0.611340013 | 0.879038518 |
| 0.827879114 | 1                                                                                                                                                                            | 0.686525123 | 0.758952222 | 0.671740845 | 0.895125801 |
| 1.134608584 | 0.449932174                                                                                                                                                                  | 1.199453655 | 0.911188418 | 1           | 2.243064138 |
| 3.318414695 | 1.442835857                                                                                                                                                                  | 1.410461437 | 1           | 0.915167839 | 0.965091624 |
| 0.936198869 | 1.103928082                                                                                                                                                                  | 0.866923211 | 1           | 0.837942952 | 0.828511626 |
| 0.864614613 | 0.815415888                                                                                                                                                                  | 1.195506987 | 1           | 1.145370869 | 1.25310718  |
| 1.450556588 | 1.004340689                                                                                                                                                                  |             |             |             |             |
| YDR472W     | YDR472W::TRS31::targeting complex (TRAPP) component involved in ER to Golgi membrane traffic                                                                                 |             |             |             | 1           |
| 0.955691443 | 1                                                                                                                                                                            | 0.870960202 | 0.82269463  | 1.00193749  | 0.918023019 |
| 0.970156949 | 0.891028392                                                                                                                                                                  | 0.853223902 | 0.849325487 | 1           | 0.827742547 |
| 1.566752492 | 1.285087075                                                                                                                                                                  | 1.08994634  | 1           | 0.761914809 | 1.169781228 |
| 0.691696583 | 0.826928238                                                                                                                                                                  | 1           | 1.22751079  | 1.330649604 | 1.001568572 |
| 1.114605115 | 0.897281448                                                                                                                                                                  | 1           | 0.99921456  | 1.285705652 | 0.6760647   |
| 0.697239758 | 0.870052245                                                                                                                                                                  | 1           | 1.141117345 | 1.018747528 | 0.936369191 |
| 1.118968287 | 0.897941771                                                                                                                                                                  | 0.978071994 |             |             |             |
| YCL011c     | "YCL011c::GBP2::binds single-stranded telomeric repeat sequences in vitro; similar to Gbplp, a single-stranded telomeric DNA-binding protein from Chlamydomonas reinhardtii" |             |             |             | 1           |
| 0.969248265 | 1                                                                                                                                                                            | 1.318057686 | 1.158090842 | 1.005163461 | 1.088650254 |
| 0.9805069   | 0.952012974                                                                                                                                                                  | 0.751274458 | 0.900034589 | 1           | 0.685298308 |
| 0.393595213 | 0.424871834                                                                                                                                                                  | 0.714503132 | 1           | 1.216231398 | 0.628487573 |
| 0.631988454 | 0.926329196                                                                                                                                                                  | 1           | 0.961882404 | 0.968946642 | 0.713312894 |
| 0.789722331 | 0.950918174                                                                                                                                                                  | 1           | 0.915078972 | 1.058040003 | 0.86439226  |
| 0.808245291 | 1.247977583                                                                                                                                                                  | 1           | 0.99434626  | 1.081098312 | 0.93729237  |
| 1.340470841 | 0.917372536                                                                                                                                                                  | 1.772262914 |             |             |             |
| YNR061C     | YNR061C::YNR061C::molecular_function unknown                                                                                                                                 |             |             |             | 1           |
| 0.998896342 | 0.827820611                                                                                                                                                                  | 1.145228587 | 1           | 1.012173101 | 0.956074154 |
| 1.062062579 | 0.91494396                                                                                                                                                                   | 1           | 1.32274136  | 0.959123637 | 0.927743875 |
| 0.801582719 |                                                                                                                                                                              | 0.8143765   | 0.540084153 | 0.644467669 | 0.712404891 |
| 1.775217596 | 1.1375044                                                                                                                                                                    | 1.711053154 | 1.51817384  | 1           | 1.349241152 |
| 1.263703367 | 1.206770389                                                                                                                                                                  | 1.270975988 | 0.983741466 | 1           | 0.887741954 |
| 1.260783402 | 0.730385804                                                                                                                                                                  | 0.578494822 | 0.776632453 | 1           | 1.347047624 |
| 1.177040078 | 1.038413567                                                                                                                                                                  | 1.258964874 | 0.924046704 | 1.415008433 |             |
| YDR486C     | YDR486C::VPS60::vacuolar protein sorting (putative)                                                                                                                          |             |             |             | 1           |
| 2.009588176 | 1.704449493                                                                                                                                                                  | 1.388019663 | 1.256680218 | 1           | 1.786457573 |
| 1.53237177  | 1.190592674                                                                                                                                                                  | 1.115104428 | 1           | 1.472811244 | 1.402528746 |
| 1.056636701 | 0.893504073                                                                                                                                                                  | 1           | 0.741528284 | 0.7781913   | 0.943519443 |
| 1.339332233 | 0.730055341                                                                                                                                                                  |             | 0.564264513 | 1           | 1.092235309 |
| 1.183116986 | 0.908526485                                                                                                                                                                  | 1.135146237 | 1           | 1.176122397 | 1.866967378 |
| 1.302051869 | 1.201400801                                                                                                                                                                  | 1.589525825 | 1           | 1.259521632 | 1.645444814 |
| 1.13925512  | 1.460224783                                                                                                                                                                  | 1.223207957 | 1.239007927 |             |             |



|             |                                                                                                           |             |             |             |             |
|-------------|-----------------------------------------------------------------------------------------------------------|-------------|-------------|-------------|-------------|
| 1.101918806 | 1.255231558                                                                                               | 1.2359531   | 1           | 0.933250158 | 1.084033465 |
| 1.236273978 | 1.043525202                                                                                               | 1           | 1.282699851 |             | 1.262710747 |
| 1.29438828  | 1.33736144                                                                                                | 1.071947115 | 1           | 1.039555135 | 1.15744002  |
| 0.989704726 | 0.788275435                                                                                               | 1.128595362 | 1           | 1.252990268 | 1.377596589 |
| 1.004661587 | 1.218256974                                                                                               | 1           | 1.262601355 | 0.943694161 | 0.877934136 |
| 1.359033686 | 1.309673198                                                                                               | 1.081395653 |             |             |             |
| YCL034W     | YCL034W::LSB5::LAs17 Binding protein                                                                      |             | 1           |             | 1.232327358 |
| 1.46204369  | 1.061561008                                                                                               | 1.345570765 | 1           | 1.250313477 | 1.457224942 |
| 1.563372206 | 1                                                                                                         | 1.174158317 | 1.512116024 | 1.896766604 | 1.40076539  |
| 1.426391168 | 1.261742145                                                                                               | 1.301932164 | 1.710172498 | 1           | 1.919684326 |
| 2.53479055  | 2.384976131                                                                                               | 1.456824744 | 1           | 1.114054071 | 1.220178237 |
| 1.038782539 | 0.994383418                                                                                               | 0.867983147 | 1           | 1.086295952 | 1.449882608 |
| 1.402381739 | 1.101296213                                                                                               | 1.44719684  | 1           | 1.180027041 | 1.331916606 |
| 1.250678615 | 1.30468733                                                                                                | 1.549148687 | 1.592760061 |             |             |
| YCL036W     | YCL036W::GFD2::Great for FULL DEAD box protein activity                                                   |             |             |             | 1           |
| 0.963450169 | 0.930408602                                                                                               | 1.113534874 | 0.983124487 | 1           | 1.058817784 |
| 1.03065712  | 0.993795059                                                                                               | 1.220955006 | 1           | 0.957248941 | 0.948240834 |
| 1.001164637 | 1.054832191                                                                                               | 1           | 0.76910532  | 0.862822278 | 0.995657235 |
| 0.865122601 | 0.942990042                                                                                               | 0.598337211 | 0.586280913 | 1           | 0.582025182 |
| 0.69054517  | 0.862264994                                                                                               | 0.782752112 | 1           | 0.53024431  | 0.533788985 |
| 1.133107161 | 1                                                                                                         | 0.401881568 | 0.515462456 | 0.768075034 | 0.660906604 |
| 0.540309232 | 0.868618994                                                                                               |             |             |             |             |
| YOR281C     | YOR281C::PLP2::Phosducin-like protein                                                                     |             | 1           |             | 0.772313076 |
| 1.043660102 | 0.906932028                                                                                               | 1.41653147  | 1           | 0.827823218 | 0.839361605 |
| 1.218073119 | 1                                                                                                         | 0.833575187 | 0.825505374 | 0.927685113 | 0.996560971 |
| 0.877005563 | 0.560997117                                                                                               | 0.526635818 | 0.831063137 |             | 0.9848853   |
| 0.866252498 | 0.926238166                                                                                               | 1           | 0.980187288 | 1.030926909 | 0.745769694 |
| 0.647560888 | 1.011182305                                                                                               | 1           | 1.543010551 | 1.672326037 | 1.099442136 |
| 1.126591527 | 2.805731878                                                                                               | 1           | 0.870486189 | 1.140557269 | 0.719936878 |
| 1.344426758 | 0.918578601                                                                                               | 1.179465531 |             |             |             |
| YOR283W     | YOR283W::YOR283W::molecular_function unknown                                                              |             | 1           |             | 1.174460181 |
| 1.154231783 | 1.0190536                                                                                                 | 1.751834413 | 1           | 0.949172839 | 0.854793239 |
| 1.393101612 | 1.298461825                                                                                               | 1           | 0.819246271 | 0.66288795  | 0.690777936 |
| 1.229343137 | 1                                                                                                         | 0.612447016 | 0.534077576 | 0.439869357 | 0.960630928 |
| 1.217444994 | 0.897009445                                                                                               | 1.384860618 | 1           | 1.194884704 | 1.005588419 |
| 0.74319868  | 1.008799312                                                                                               | 1.152366314 | 1           | 1.032828777 | 1.283516348 |
| 0.810204637 | 1.026130435                                                                                               | 2.413318302 | 1           | 1.059862189 | 1.185942539 |
| 0.849719637 | 1.938962717                                                                                               | 0.968973971 | 1.25914728  |             |             |
| YOR285W     | YOR285W::YOR285W::molecular_function unknown                                                              |             | 1           |             | 1.229173544 |
| 1.919883606 | 1.385196993                                                                                               | 2.547230204 | 1           | 1.19408783  | 1.552269359 |
| 2.531201962 | 2.098754858                                                                                               | 1           | 1.447658562 | 2.145727429 | 4.525691521 |
| 1.948729765 | 1                                                                                                         | 1.269050965 | 1.221872193 | 2.109974073 | 2.064317734 |
| 1.731212415 | 3.175673906                                                                                               | 4.390751096 | 2.695710051 | 1           | 1.213011014 |
| 1.800280713 | 1.944212084                                                                                               | 1.017219699 | 1.09371043  | 1           | 1.145205255 |
| 3.053577365 | 3.158057228                                                                                               | 2.804306929 | 2.62920077  | 1           | 1.276193875 |
| 2.220114591 | 1.447503316                                                                                               | 1.487986265 | 1.681967955 | 1.987666463 |             |
| YOR299W     | YOR299W::BUD7::bud site selection                                                                         |             | 1           |             | 1.087585099 |
| 1.700387024 | 1.381548613                                                                                               | 1           | 1.587095697 | 1.641935845 | 1.352013765 |
| 1.155021703 | 1                                                                                                         | 1.404406363 | 1.476595108 | 1.050243518 | 1.618291037 |
| 0.776635358 |                                                                                                           |             |             |             | 1           |
| 1.102033057 | 1.130133256                                                                                               | 1.15203381  | 1.234168136 | 1           | 1.190910842 |
| 0.812938055 | 0.950347066                                                                                               | 0.85713891  | 0.538472537 | 1           | 1.212272505 |
| 0.969451289 | 0.999059861                                                                                               | 0.930785952 | 1.019849112 | 0.794190973 |             |
| YOR301W     | YOR301W::RAX1::A rax1 mutation converts the budding pattern of an axl1 null mutant from bipolar to axial. |             | 1           |             | 0.641171733 |
| 0.621730439 | 0.46009934                                                                                                | 1           | 0.781403782 | 0.777967619 | 0.513085244 |
| 0.505772511 | 1                                                                                                         | 0.802721915 | 0.659312034 | 0.437689482 | 0.508171735 |

|             |                                                                                                                                                               |             |             |             |               |
|-------------|---------------------------------------------------------------------------------------------------------------------------------------------------------------|-------------|-------------|-------------|---------------|
| 0.538834976 | 0.527051901                                                                                                                                                   | 0.419791188 | 0.518766793 | 1           | 0.803096197   |
| 0.667918756 | 0.390369312                                                                                                                                                   | 0.642949474 | 1           | 1.038880901 | 0.945970697   |
| 1.164078518 | 1.152520887                                                                                                                                                   | 0.926771618 | 1           | 1.106572368 | 1.040903722   |
| 1.134389606 | 1.823995921                                                                                                                                                   | 0.811385227 | 1           | 0.755622002 | 0.868206413   |
| 1.022012023 | 0.859832007                                                                                                                                                   | 0.76715138  | 0.662847393 |             |               |
| YOR303W     | "YOR303W::CPA1::Carbamoyl phosphate synthetase, arginine specific"                                                                                            |             |             |             |               |
| 1           | 1.394744617                                                                                                                                                   | 0.888125447 | 0.770369879 | 0.439683838 | 1 0.806412587 |
| 0.775210466 | 0.643666135                                                                                                                                                   | 0.790243844 | 1           | 2.70834525  | 0.999386359   |
| 0.572144193 | 0.737308032                                                                                                                                                   | 1           | 2.583221699 | 2.446189337 | 1.368552652   |
| 1.00018115  | 1                                                                                                                                                             | 1.776360251 | 2.111294241 | 1.220546495 | 1.407780604 1 |
| 1.485568285 | 1.027517431                                                                                                                                                   | 1.223802984 | 1.394620475 | 1.074720223 | 1             |
| 1.050135328 | 0.764381295                                                                                                                                                   | 0.995454936 | 1.463080209 | 0.614062302 | 1             |
| 0.983219756 | 0.714221578                                                                                                                                                   | 1.32113807  | 0.793165261 | 0.513526554 | 1.030609488   |
| YOR305W     | YOR305W::YOR305W::molecular_function unknown 1 0.63639622                                                                                                     |             |             |             |               |
| 0.894000601 | 0.76467891                                                                                                                                                    | 1.002884962 | 1           | 0.647116045 | 0.649241052   |
| 0.945472227 | 0.989912228                                                                                                                                                   | 1           | 0.680191889 | 0.724334129 | 0.79590721    |
| 0.972927304 | 1                                                                                                                                                             | 0.817319832 | 0.562659733 | 1.193414939 | 1             |
| 1.339536594 | 1.622543935                                                                                                                                                   | 1.278344053 | 1.113585189 | 1           | 0.842954696   |
| 0.830813075 | 0.647452305                                                                                                                                                   | 0.556293339 | 0.97740378  | 1           | 1.033481829   |
| 1.663068906 | 1.335302915                                                                                                                                                   | 1.315236744 | 1.800591706 | 1           | 0.840841678   |
| 1.395085104 | 0.928192934                                                                                                                                                   | 1.519242197 | 1.103992456 | 1.335326579 |               |
| YOR307C     | YOR307C::SLY41::multicopy suppressor of ypt1 deletion 1                                                                                                       |             |             |             |               |
| 0.90515176  | 0.615166507                                                                                                                                                   | 0.90441456  | 0.671086947 | 1           | 0.862733292   |
| 0.570139832 | 0.78962971                                                                                                                                                    | 1           | 0.769202414 | 0.551862233 | 0.555851962   |
| 0.817535211 | 1                                                                                                                                                             | 0.654724083 | 0.398743608 | 0.600674643 | 0.721993776 1 |
| 0.71878791  | 0.524368356                                                                                                                                                   | 0.724366353 | 0.767873625 | 1           | 0.868231929   |
| 0.814725382 | 1.079524027                                                                                                                                                   | 1.01109758  | 0.937889733 | 1           | 0.735556468   |
| 0.727848537 | 0.657108905                                                                                                                                                   | 0.916925825 | 0.453266451 | 1           | 0.654345452   |
| 0.698561062 | 0.853038516                                                                                                                                                   | 0.665771545 | 0.682539162 | 0.760917271 |               |
| YNR075W     | "YNR075W::COS10::Protein with strong similarity to subtelomerically-<br>encoded proteins such as Cos5p, Ybr302p, Cos3p, Cos1p, Cos4p, Cos8p, Cos6p,<br>Cos9p" |             |             |             |               |
| 1           | 0.946239346                                                                                                                                                   | 0.665154597 | 1           | 0.841264788 |               |
| 0.811122466 | 0.618868509                                                                                                                                                   | 0.713067365 | 1           | 0.922811262 | 0.819095333   |
| 0.357626189 | 1.135622324                                                                                                                                                   | 1           | 0.325716214 | 0.759270978 | 0.391626947 1 |
| 1.384598492 | 1.66059135                                                                                                                                                    | 1           | 1.279644188 | 1.185286092 |               |
| 1.668266964 | 1.095988098                                                                                                                                                   | 1           | 1.161923867 | 0.941201567 | 1.551047018   |
| 0.898266942 | 0.791506159                                                                                                                                                   | 1           | 0.848328788 | 0.92123765  |               |
| 0.602296634 |                                                                                                                                                               |             |             |             |               |
| YOR309C     | YOR309C::YOR309C::molecular_function unknown 1 1.422758044                                                                                                    |             |             |             |               |
| 1.19045786  | 0.885808921                                                                                                                                                   | 1.865453094 | 1           | 0.908074312 | 0.782621568   |
| 1.338478572 | 1.489781683                                                                                                                                                   | 1           | 0.911316657 | 0.506976282 | 0.599821723   |
| 1.114017181 | 1                                                                                                                                                             | 0.49811614  | 0.210697963 | 0.205650486 | 0.517341887 1 |
| 0.71750023  | 0.301946811                                                                                                                                                   | 0.301064053 | 0.410573122 | 1           | 0.728004604   |
| 0.56950556  | 0.509140646                                                                                                                                                   | 0.656144936 | 0.693617935 | 1           | 0.768162339   |
| 0.736846506 | 0.45178075                                                                                                                                                    | 0.634542949 | 1.386053886 | 1           | 0.612314715   |
| 0.751597076 | 0.850673162                                                                                                                                                   | 1.336506268 | 0.588796485 | 1.12167436  |               |
| YOR323C     | YOR323C::PRO2::second enzyme in proline biosynthesis 1                                                                                                        |             |             |             |               |
| 0.957446802 | 0.802782006                                                                                                                                                   | 0.813400007 | 0.692234651 | 1           | 0.850108968   |
| 0.66728925  | 0.721247789                                                                                                                                                   | 1           | 0.906831634 | 0.903958235 | 0.691272398   |
| 0.730667506 | 1                                                                                                                                                             | 1.477152635 | 1.165933095 | 0.933016613 | 0.845126036 1 |
| 1.173232106 | 0.534012158                                                                                                                                                   | 0.316451669 | 0.878372411 | 1           | 1.096931655   |
| 0.876534301 | 1.626531322                                                                                                                                                   | 1.222578057 | 1.184888281 | 1           | 1.039839878   |
| 0.934907668 | 0.919113775                                                                                                                                                   | 0.686514888 | 0.505491523 | 1           | 0.973996988   |
| 1.059339098 | 0.87236964                                                                                                                                                    | 0.726604996 | 0.600822412 | 0.837972183 |               |
| YNR077C     | YNR077C::YNR077C::molecular_function unknown 1 1.388537974                                                                                                    |             |             |             |               |
| 1.532151469 | 1.017555245                                                                                                                                                   | 0.949949839 | 1           | 1.325662769 | 1.34236098    |
| 1.403850003 | 1.044699546                                                                                                                                                   | 1           | 1.416520285 | 1.324563725 | 2.34140536 1  |

1.292878323 1.342053104 2.074807853 1.045133177 1 0.809978986  
2.014924923 1.498195074 0.895249718 1 1.03648936  
1 1.17277048 1 0.812810869  
1.017475036  
YOL002C YOL002C::YOL002C::molecular\_function unknown 1 1.36232826  
1.042281256 0.93924973 1 1.172607909 0.98920698 1.449380889  
1.306165074 1 1.011478841 0.884068635 0.996253595 1.172165528 1  
0.621132755 0.335327926 0.367591284 0.745544729 1 0.983408229  
0.609585334 0.721665814 1.038396728 1 1.010814888 1.18172284  
1.283305964 1.299197109 1.052259716 1 0.912142259 1.507959318  
1.423053443 0.663199337 1.252393751 1 1.070177146 1.33639483  
0.958755141 1.326662439 0.588622036 1.437774573  
YOL004W YOL004W::SIN3::DNA binding protein involved in transcriptional  
regulation 1 0.907998452 0.881696443 1.013150275 0.538373134 1  
1.133968733 1.227793839 0.809487997 0.636926084 1 1.137848674  
1.220293899 0.630059709 0.779032231 1 0.864258878 1.054155444  
0.920453621 0.565242077 1 0.665523677 0.699608551 0.548062724  
0.685564612 1.21544303 0.805350875 0.941623813  
0.957468138 1.415401223 0.903983012 0.976360451 1.226239876 1  
1.375372922 1.072074674 1.035398777  
YOL004W YOL004W::SIN3::DNA binding protein involved in transcriptional  
regulation  
1 0.988137072 1.146395799 1.171263438 1.287982188 1.201467978 1  
1.010050391 0.642371958 0.753107218 0.997905398 0.484533673 1  
0.769204856 0.630674769 0.889736657 0.496157479 0.960129496 0.851106531  
YOL006C YOL006C::TOP1::topoisomerase I 1 0.621982631 0.809136359  
0.846406392 0.860648853 1 0.855691736 0.760649248 0.922537644  
0.90633613 1 0.693057379 0.761026462 0.60343643 0.891483177 1  
0.50167413 0.565937221 0.58678939 0.812289819 1 1.112594481  
1.42235753 1.494615432 1.229502167 1 0.823564907 0.860568297  
0.819337178 0.86784396 0.989280922 1 0.886534129 0.900629941  
0.716513097 1.033219122 0.95514277 1 0.877822099 0.885524509  
0.982459433 0.865960189 0.92460227 0.79331536  
YDR496C YDR496C::PUF6::member of the PUF protein family 1 0.718550823  
0.597951496 0.983148237 0.935624576 1 0.748114978 0.742109313  
0.937590496 0.985033976 1 0.425157435 0.366394583 0.320916828  
0.96848668 1 0.207448814 0.185763611 1 0.336647501  
0.232264532 0.47448984 1 0.633923462 0.539268623 0.586136416  
0.798646544 0.970091324 1 0.751722409 0.672821809 0.383127557  
1.065121873 0.588756311 1 0.547191283 0.536069424 0.840388423  
0.827474228 0.471343599 0.635703034  
YOL008W YOL008W::YOL008W::molecular\_function unknown 1 1.059492993  
1.207473893 0.977753106 1 1.084723156 1.099703456 1.581355954  
1.337681616 1 1.033531994 1.030583187 1.26412198 1.121092093 1  
0.705406772 1.285985496 1.269608709 1.056841672 1 0.751648633  
1.025542819 0.833792993 0.569505864 1 1.166806669 1.334531929  
1.279145649 1.402580707 1.262344342 1 0.93021815 0.972662777  
0.8152193 0.770637197 1.261655853 1 0.8960343 0.741818148  
0.863219635 0.816694284 1.087524994  
YDR510W YDR510W::SMT3::may be involved in function and/or structure of the  
eukaryotic kinetochore homologous to SUMO-1 1 1.109707468 1.968237773  
1.262708164 2.322691353 1 1.17663225 1.395437559 2.071776735  
2.022585258 1 1.383323969 1.76298652 2.577963835 1.596329316 1  
1.348150796 1.149209052 1.283663595 1.24784688 1 1.719479424  
2.41553387 2.399207419 1.334950788 1 0.940866676 1.179995152  
1.048522348 0.767790721 0.940404001 1 1.468752954 2.438449776



|         |                                                                                        |             |             |             |             |             |
|---------|----------------------------------------------------------------------------------------|-------------|-------------|-------------|-------------|-------------|
|         | 2.120475666                                                                            | 2.343635573 | 2.663306463 | 1           | 0.958837849 | 1.339978113 |
|         | 1.38905811                                                                             | 1.416142606 | 1.193025683 | 1.522710103 |             |             |
| YCL050c | "YCL050c::APA1::diadenosine 5',5'''-P1,P4-tetraphosphate phosphorylase I"              |             |             |             |             |             |
|         | 1                                                                                      | 1.195316669 | 1.151897617 | 1.228694801 | 1.126147227 | 1           |
|         | 1.123184518                                                                            | 1.021591486 | 1.146701676 | 1.053032048 | 1           | 1.003003388 |
|         | 1.038212292                                                                            | 1.156808844 | 1.000779733 | 1           | 0.815837431 | 1.483269754 |
|         | 1.218134758                                                                            | 0.706534223 | 1           | 0.486690167 | 0.394923888 | 0.257375915 |
|         | 0.439991276                                                                            | 1           | 0.855989254 | 0.614050455 | 0.864265532 | 0.823436108 |
|         | 0.814622788                                                                            |             | 0.944426612 | 0.770377478 | 0.721416746 | 1           |
|         | 0.717150472                                                                            | 0.704127803 | 0.766570545 | 0.976874046 | 0.647405023 | 0.815205939 |
| YOL117W | YOL117W::RRI2::Hypothetical ORF                                                        |             |             |             |             |             |
|         | 1                                                                                      | 1.751529506 | 1.777298998 | 1.631726362 | 1.64074718  | 1           |
|         | 1.871870545                                                                            | 1           | 1.751529506 | 1.777298998 | 1.631726362 | 1.64074718  |
|         | 1.697758843                                                                            | 2.251777192 | 1.531088949 | 1.618359374 | 1           | 1.512583088 |
|         |                                                                                        | 0.646112693 |             | 1           | 1.032189097 | 1.25555419  |
|         | 1.010950249                                                                            | 1.07189305  | 1.229999623 | 1           | 1.209120319 | 1.003832833 |
|         | 1.124483868                                                                            | 1.677356523 | 1           |             | 0.582472512 | 0.722214055 |
|         | 0.597726909                                                                            | 0.760285289 | 1.111166903 |             |             |             |
| YDR512C | YDR512C::EMI1::Early Meiotic Induction                                                 |             |             |             |             |             |
|         | 1                                                                                      |             |             | 1           | 0.966635608 |             |
|         | 1.472956018                                                                            | 1.143764266 | 1.39252232  | 1           | 1.057779156 | 1.338694809 |
|         | 1.715799146                                                                            | 1.654572182 | 1           | 1.351332313 | 2.183633076 | 2.694055448 |
|         | 1.214486838                                                                            | 1           | 2.385830337 | 2.40565595  | 2.226682979 | 2.304524219 |
|         | 2.092884743                                                                            | 3.325809983 | 3.505794725 | 2.129512516 | 1           | 1.016471946 |
|         | 1.492127494                                                                            | 0.999591318 | 0.657226867 | 0.914168813 | 1           | 1.093048336 |
|         | 2.05525618                                                                             | 1.350035439 | 1.395388983 | 1.549923747 | 1           | 1.643355639 |
|         | 1.866146161                                                                            | 1.315904192 | 1.592430273 | 1.357736035 | 1.525336994 |             |
| YCL052c | YCL052c::PBN1::Protease B Non-derepressible                                            |             |             |             |             |             |
|         | 1                                                                                      |             |             | 1           | 0.875162022 |             |
|         | 1.081228569                                                                            | 0.987021772 | 1.088624686 | 1           | 1.020798263 | 1.04970568  |
|         | 1.093652395                                                                            | 0.892284325 | 1           | 1.013988659 | 1.267687249 | 1.163058116 |
|         | 0.956009479                                                                            | 1           | 2.169815276 | 1.280664157 | 1.948309443 | 1.663861815 |
|         | 2.175634141                                                                            | 1.748945045 | 2.081481746 | 1.084721175 | 1           | 1.059554474 |
|         | 1.181196927                                                                            | 1.156330151 | 0.886095076 | 1.171396179 | 1           | 1.236185864 |
|         | 1.229873223                                                                            | 0.853440489 | 0.843125075 | 0.891341408 | 1           | 0.981853572 |
|         | 0.978318437                                                                            | 0.896559518 | 1.001453079 | 1.059009971 | 1.20135611  |             |
| YOL119C | YOL119C::MCH4::monocarboxylate permease homologue                                      |             |             |             |             |             |
|         | 1                                                                                      |             |             |             |             | 1           |
|         | 0.866539745                                                                            | 0.824966363 | 0.769991924 | 0.429004598 | 1           | 0.843741857 |
|         | 0.847056926                                                                            | 0.715537752 | 0.641843232 | 1           | 2.728752946 | 2.110187542 |
|         | 0.923691296                                                                            | 0.800106498 | 1           | 2.604723002 | 1.801152931 | 1.857189885 |
|         | 1.727738012                                                                            | 1           | 3.161040203 | 2.451460663 | 2.645707008 | 1.30652923  |
|         | 1.531478211                                                                            | 1.774128593 | 2.068724546 | 1.380977394 | 1.025297586 | 1           |
|         | 2.084405387                                                                            | 1.452376245 | 1.930913062 | 2.18347566  | 0.621235667 | 1           |
|         | 1.700471046                                                                            | 1.15670171  | 1.526159927 | 0.727028515 | 0.608465947 | 0.866867768 |
| YDR514C | YDR514C::YDR514C::molecular_function unknown                                           |             |             |             |             |             |
|         | 1                                                                                      |             |             | 1           | 0.708735172 |             |
|         | 0.900857419                                                                            | 0.879907702 | 0.978879334 | 1           | 0.846237337 | 0.811066388 |
|         | 1.067746982                                                                            | 1           | 0.590864227 | 0.638399032 | 0.718756058 | 0.954748877 |
|         | 0.479596138                                                                            |             | 0.545248439 | 0.970786629 | 1           | 0.83396762  |
|         | 0.666848646                                                                            | 1           |             | 0.921210376 | 1.048197183 | 0.80208193  |
|         | 1.022199525                                                                            | 1.299628174 |             | 1.149620855 | 1.090927552 | 1           |
|         | 1.001181768                                                                            | 0.994804583 | 1.22105114  | 0.872258146 | 1.035863164 |             |
| YCL054W | YCL054W::SPB1::Suppressor of PaB1 mutant; involved in 60S ribosomal subunit biogenesis |             |             |             |             |             |
|         | 1                                                                                      | 0.853905168 | 0.835672432 | 1.14532481  | 0.877830142 | 1           |
|         | 0.856928272                                                                            | 0.882542576 | 0.961154912 | 0.987226821 | 1           | 0.484864732 |
|         | 0.560362604                                                                            | 0.445429944 | 1.083336865 | 1           | 0.460722152 | 0.420921035 |
|         | 0.495501046                                                                            | 1           | 0.872337791 |             | 1           | 0.590520053 |
|         | 0.596562058                                                                            | 0.610558165 | 0.784767864 | 0.84790748  | 1           | 0.631282663 |
|         | 0.608900823                                                                            | 0.389523059 | 0.90426649  | 0.740198208 | 1           | 0.673654011 |
|         | 0.623828161                                                                            | 1.149251779 | 0.742219827 | 0.578004877 | 0.802947204 |             |

YOL121C YOL121C::RPS19A::Homology to rat S19 1 0.896680871  
1.151435867 0.719626862 1.483311029 1 0.824636515 0.811516484  
1.221117763 1.145477423 1 0.759694115 0.736700139 0.692495046  
0.799591568 1 0.958981301 0.334115014 0.240804279 0.748886533 1  
1.645635588 1.169579276 0.685386772 0.777666685 1 1.00674635  
0.947656665 0.87928715 1.011505845 1.035731115 1 1.233744524  
1.484973501 0.819373829 0.773518797 1.890480544 1 0.972770623  
1.335224649 0.856295392 2.048114422 0.944536469 1.432520897  
YDR516C YDR516C::EMI2::Early Meiotic Induction 1 1.137311058  
1.634687235 1.666322087 0.955175135 1 1.80599507 2.044541768  
1.203362446 1.092200918 1 1.593298743 2.273691703 2.814266485  
1.072185317 1 6.159712421 3.316810199 4.228685027 2.479338113 1  
6.15619336 3.801863404 3.176309031 1.688591011 1 1.290912302  
1.857081797 2.238473173 1.079530606 1.556544175 1 1.744219811  
1.6895512 2.414150205 1.09453912 0.61883025 1 2.688881836  
1.783288773 1.398694951 1.254771195 2.151007294 1.157574951  
YCL056C YCL056C::YCL056C::molecular\_function unknown 1 1.301194008  
1.78740957 1.181629365 1.770672912 1 1.182939868 1.129835876  
1.729544945 1.584418113 1 1.051683482 1.618781488 2.710960582  
1.183023502 0.383454992 0.389992422 0.383022543 0.562497304 1  
1.870105451 3.43639063 3.090774473 1 0.78289736 1.027344647  
0.682168883 0.527416302 0.777994172 1 1.015261344 1.831101959  
1.554169335 1.087709288 1.837351803 1 1.125427559 1.360763143  
1.691515754 1.726546071 1.520958878  
YOL123W YOL123W::HRP1::Putative polyadenylated-RNA-binding protein located  
in nucleus; similar to vertebrate hnRNP A/B protein family 1 0.861126451  
0.881829509 1.182017333 0.898329313 1 0.989213177 1.067317275  
0.953056597 0.879472343 1 0.712759452 0.734718061 0.965854153  
0.912282725 1 0.575239183 0.701615361 0.912765039 1  
0.52991843 0.486488159 0.47045953 0.580847192 1 0.736012667  
0.761787064 1.214203787 0.950904068 1.242436186 1 0.871256591  
0.562461273 0.625665424 0.739012714 0.632211482 1 0.715893005  
0.605254846 1.13197014 0.913755667 0.66747019 1.293296646  
YDR518W YDR518W::EUG1::ER protein functionally likely involved in  
interacting with nascent polypeptides in the ER 1 0.895572003 0.801753841  
0.956231029 0.922619848 1 0.918269652 0.98487219 0.897334763  
0.738513822 1 0.823797318 0.74374321 0.592543823 0.989447548 1  
1.346637819 1 0.750693853 0.933270349 0.262760359  
1.372568466 1 1.079607501 1.101263892 1.603052919 1.777280199  
1.363664261 1 0.885463 1.018365592 1.02492789 1.259324329  
0.779408511 1 1.035816456 0.957284374 1.196431774 1.09071543  
1.04605989 0.835345293  
YCL058C YCL058C::FYV5::Function required for Yeast Viability on toxin  
exposure 1 1.148514034 1.674411871 1.118992705 1.976445484 1  
1.085312096 1.257236495 2.159697947 1.982375569 1 0.941600595  
1.198984764 2.446055187 1.457987235 1 1.228946538 0.772185721  
1.005950477 1.948515553 1 1.505325561 3.051458845 2.664190329  
1.295290115 1 0.651337562 0.763265155 0.485818412 0.560984836  
0.943612679 1 1.51974257 1.833419402 1.636855048 2.624870797  
1.73057902 1 0.744336879 0.877347995 1.027298412 1.174010604  
2.165485414 1.515705097  
YDR520C YDR520C::YDR520C::molecular\_function unknown 1 1.001104623  
0.923824942 1.029574969 1.06728427 1 1.045704306 1.006319645  
1.137063418 1.018805646 1 0.799294347 0.881409061 0.84143285  
1.034854189 1 1.054127383 0.876516663 1.118997487 0.87883614 1  
0.902181829 2.277765892 0.953645595 1 1.013233736 1.09406758  
1.051640017 1.094154917 1.174795339 1 1.090254303 0.962784521

|         |                                                                                                                                                 |             |             |             |             |             |             |   |             |
|---------|-------------------------------------------------------------------------------------------------------------------------------------------------|-------------|-------------|-------------|-------------|-------------|-------------|---|-------------|
|         | 0.848324364                                                                                                                                     | 1.015064741 | 1.068116369 | 1           | 0.878296641 | 0.79198091  |             |   |             |
|         | 0.870275069                                                                                                                                     | 1.050372066 | 0.946749781 | 1.306430994 |             |             |             |   |             |
| YCL060C | YCL060C                                                                                                                                         | 1           | 0.614343916 | 0.662105617 | 1.050382925 | 0.66644618  | 1           |   |             |
|         | 0.821659499                                                                                                                                     | 0.970666258 | 0.756333523 | 0.664483301 | 1           | 0.708597833 |             |   |             |
|         | 0.720800318                                                                                                                                     | 0.518815329 | 1.040394783 | 1           | 0.534877328 | 0.528988749 |             |   |             |
|         | 0.718536497                                                                                                                                     | 0.921915545 | 1           | 1.118303131 | 1.499729558 | 1.61100426  |             |   |             |
|         | 1.034335427                                                                                                                                     | 1           | 1.020302821 | 1.16794972  | 1.001781027 | 1.118833491 | 1           |   |             |
|         | 1.101401253                                                                                                                                     | 1.199654969 | 1.237701753 | 1.25669463  | 1.166866558 | 1           |             |   |             |
|         | 0.815406914                                                                                                                                     | 1.283046057 | 1.001247124 | 1.028211636 | 0.991904867 | 1.015723811 |             |   |             |
| YDR534C | "YDR534C::FIT1::FIT1, FIT2, and FIT3 code for mannoproteins that are incorporated into the cell wall via glycosylphosphatidylinositol anchors." |             |             |             |             |             |             | 1 |             |
|         | 1.054719665                                                                                                                                     | 0.896789078 | 0.827241111 | 0.681292536 | 1           | 0.990738641 |             |   |             |
|         | 0.994227089                                                                                                                                     | 0.815648683 | 0.87963484  | 1           | 1.324434556 | 1.163920134 |             |   |             |
|         | 1.47256205                                                                                                                                      | 0.743492832 | 1           | 2.198769917 | 2.48814352  |             | 1           |   |             |
|         | 1.182671746                                                                                                                                     | 1.856112515 | 1.226056879 | 1.200172787 | 1           | 0.944014022 |             |   |             |
|         | 1.245913919                                                                                                                                     | 2.255501368 | 0.948368505 | 1           | 1.239582499 | 3.38537166  |             |   |             |
|         | 7.351022802                                                                                                                                     | 12.2027063  | 1.633474388 | 1           | 1.510772236 | 2.449449823 |             |   |             |
|         | 3.096657659                                                                                                                                     | 1.377761952 | 1.322058469 | 1.263525396 |             |             |             |   |             |
| YCLX01W | YCLX01W                                                                                                                                         | 1           | 1.184493002 | 1.538638053 | 1.308595489 | 1.894025583 | 1           |   |             |
|         | 1.055291412                                                                                                                                     | 1.28041749  | 2.098666474 | 1           | 0.795986272 | 1.101772551 |             |   |             |
|         | 1.825857822                                                                                                                                     | 1.519150528 | 1           | 0.530656437 | 0.62390669  | 0.632361399 |             |   |             |
|         | 1.159075217                                                                                                                                     | 1           | 0.926160552 | 1.562919996 | 0.787702901 | 1           |             |   |             |
|         | 0.727243623                                                                                                                                     |             | 0.7575986   | 1.138525318 | 1           | 1.015813335 |             |   |             |
|         | 0.99829699                                                                                                                                      |             | 1           | 0.547480305 | 1.016466414 |             |             |   |             |
|         | 0.450201472                                                                                                                                     | 0.931663945 |             |             |             |             |             |   |             |
| YDR536W | YDR536W::STL1::sugar transporter-like protein                                                                                                   |             |             |             |             |             |             | 1 | 1.115368585 |
|         | 1.045114155                                                                                                                                     | 1.163605211 | 1.200353691 | 1           | 1.160721925 | 1.171465627 |             |   |             |
|         | 1.268021082                                                                                                                                     | 1           | 1.040122764 | 1.193111446 | 1.407622676 | 1.312286898 | 1           |   |             |
|         | 0.55771219                                                                                                                                      | 0.329732899 | 0.933077371 | 1.306603627 |             | 0.1268942   |             |   |             |
|         | 0.054519392                                                                                                                                     | 0.116323339 | 1           | 1.04354722  | 1.199333103 | 1.298889652 |             |   |             |
|         | 1.334645077                                                                                                                                     | 1.21348016  | 1           | 0.857158265 | 1.000972776 | 1.063390944 |             |   |             |
|         | 1.193725687                                                                                                                                     | 1.332130645 | 1           | 0.841507983 | 0.784668052 | 0.890063374 |             |   |             |
|         | 1.245785875                                                                                                                                     |             |             |             |             |             |             |   |             |
| YCLX03C | YCLX03C                                                                                                                                         | 1           | 1.166459938 | 1.313447228 | 1.080869192 | 1.179501582 | 1           |   |             |
|         | 1.041767414                                                                                                                                     | 1.26681067  | 1.148604519 | 1.296089129 | 1           | 1.173199524 |             |   |             |
|         | 1.074655579                                                                                                                                     | 1.407935742 | 1.112304259 | 1           | 0.93876771  | 0.660915759 |             |   |             |
|         | 1.313757379                                                                                                                                     | 1.406044604 | 1           | 1.23357264  | 2.691976224 | 2.173403506 |             |   |             |
|         | 1.000375029                                                                                                                                     | 1           | 0.757912556 | 0.935570253 | 1.166397258 | 1.039290808 |             |   |             |
|         | 0.936094613                                                                                                                                     | 1           | 0.8218122   |             | 1           | 0.715167567 |             |   |             |
|         | 0.891993755                                                                                                                                     | 0.917906815 |             | 0.687364863 |             |             |             |   |             |
| YDR538W | YDR538W::PAD1::Phenylacrylic acid decarboxylase                                                                                                 |             |             |             |             |             |             | 1 | 0.908271343 |
|         | 0.88832937                                                                                                                                      | 0.76374835  | 0.78119485  | 1           | 0.925672129 | 0.872007271 |             |   |             |
|         | 0.818627425                                                                                                                                     | 0.870553432 | 1           | 0.990565181 | 0.769890036 | 0.643960293 | 1           |   |             |
|         | 0.902979576                                                                                                                                     | 0.829712655 |             | 1.073148887 | 1           | 1.19662583  | 1.331989305 |   |             |
|         | 0.786252014                                                                                                                                     | 0.873928508 | 1           | 1.297417847 | 1.035053865 | 1.452599714 |             |   |             |
|         | 1.278356285                                                                                                                                     | 1.088865726 |             | 1.130268839 | 0.952931349 | 1.193257578 |             |   |             |
|         | 0.817482456                                                                                                                                     | 0.603549879 | 1           | 1.105341389 | 0.671082322 | 0.88005806  |             |   |             |
|         | 1.004006267                                                                                                                                     | 0.790983223 | 0.981574549 |             |             |             |             |   |             |
| YCLX05C | YCLX05C                                                                                                                                         | 1           | 1.230711637 | 1.296853009 | 1.180176999 | 1.217054126 | 1           |   |             |
|         | 1.204141524                                                                                                                                     | 1.301329471 | 1.176111455 | 1.350893008 | 1           | 1.175091734 |             |   |             |
|         | 1.261040518                                                                                                                                     | 1.753482661 | 1.237769284 | 1           | 1.113645365 | 1.232206772 |             |   |             |
|         | 1.117710401                                                                                                                                     | 1.139571635 | 1           | 1.925131249 | 1.44632333  | 1.704069426 |             |   |             |
|         | 1.130775044                                                                                                                                     | 1           | 1.146403068 | 1.131507435 | 1.328046678 | 1.265285482 |             |   |             |
|         | 1.092893593                                                                                                                                     | 1           | 0.939172205 | 0.995407796 | 0.945941392 | 0.687774073 |             |   |             |
|         | 0.952313106                                                                                                                                     | 1           | 0.933250182 | 0.874883528 | 0.889690572 | 0.900310733 |             |   |             |
|         | 1.234625676                                                                                                                                     | 0.960559531 |             |             |             |             |             |   |             |

|         |                                                                                                 |             |             |             |             |             |             |
|---------|-------------------------------------------------------------------------------------------------|-------------|-------------|-------------|-------------|-------------|-------------|
| YCLX07W | YCLX07W                                                                                         | 1           | 1.229768624 | 1.143093633 | 1.493205482 | 1.077857256 | 1           |
|         |                                                                                                 | 1.31038193  | 1.318898252 | 1.070572118 | 0.979492869 | 1           | 1.210158483 |
|         |                                                                                                 | 1.284576669 | 1.037444436 | 1.0473617   | 0.91489381  |             | 1           |
|         |                                                                                                 |             | 0.82768128  | 1           | 0.99641769  | 0.934035326 | 1.12167177  |
|         |                                                                                                 | 0.949564007 | 0.811958408 | 1           |             | 1.536436131 | 1           |
|         |                                                                                                 | 0.934160041 | 1.047258246 | 1.298858205 | 0.528192944 | 0.733772912 |             |
| YOR325W | YOR325W::YOR325W::molecular_function unknown                                                    |             |             |             |             |             | 1.286694862 |
|         |                                                                                                 | 0.974828215 | 0.898989406 | 0.787091096 | 1.035172463 | 1.077512749 |             |
|         |                                                                                                 | 0.889620662 | 0.991029536 | 0.912809745 | 0.872918777 | 0.682355359 | 1           |
|         |                                                                                                 | 1.109390797 | 0.620535664 | 0.827520128 | 0.697143667 | 1           | 0.894730546 |
|         |                                                                                                 | 0.584360648 | 0.506735542 | 0.469268145 | 1           | 0.819431146 | 0.729379587 |
|         |                                                                                                 | 0.808423032 | 0.855453997 | 0.702597598 | 1           | 1.007245812 | 0.871770047 |
|         |                                                                                                 | 0.671921713 | 1.047551412 | 1.035976912 | 1           | 0.713924132 | 0.911477863 |
|         |                                                                                                 | 0.847699784 | 0.916757295 | 0.729795968 | 0.892260903 |             |             |
| YOR327C | YOR327C::SNC2::mediate the targeting and transport of secretory proteins                        | 1           | 0.978851171 | 1.433717789 | 0.885808903 | 1.8765083   | 1           |
|         |                                                                                                 | 0.863573448 | 1.040530934 | 1.585508425 | 1.77437926  | 1           | 1.105396878 |
|         |                                                                                                 | 1.374098328 | 1.649198497 | 1.168774021 | 1           | 1.284742489 | 0.770561281 |
|         |                                                                                                 | 0.711502862 | 1.252382515 | 1           | 2.164753699 | 2.30394357  | 2.14300447  |
|         |                                                                                                 | 1.279388928 | 1           | 0.847134272 | 1.19717025  | 0.750714693 | 0.582105393 |
|         |                                                                                                 | 0.883270387 | 1           | 1.222964321 | 2.049154774 | 2.249809465 | 2.236611635 |
|         |                                                                                                 | 2.071663952 | 1           | 1.383849905 | 2.167782074 | 1.717283634 | 1.589200811 |
|         |                                                                                                 | 1.497725086 | 1.459665256 |             |             |             |             |
| YOR329C | YOR329C::SCD5::Multicopy suppressor of clathrin deficiency and of ts mutants of IPL1            | 1           | 0.706344485 | 0.744722087 | 0.863044841 | 0.546863007 | 1           |
|         |                                                                                                 | 0.866669493 | 0.971789534 | 0.699152356 | 0.613388017 | 1           | 1.03038327  |
|         |                                                                                                 | 1.121558409 | 1.243984032 | 0.794113748 | 1           | 1.318632968 | 1.379360822 |
|         |                                                                                                 | 1.836770299 | 0.992166909 | 1           | 0.890011783 | 1.048900626 | 1.077317434 |
|         |                                                                                                 | 0.648391246 | 1           | 1.244006284 | 1.222961412 | 1.13704543  | 0.850049439 |
|         |                                                                                                 | 0.946618433 | 1           | 0.945110591 | 0.880975885 | 1.062214973 | 1.019240616 |
|         |                                                                                                 | 0.868747768 | 1           | 0.802049605 | 1.055606809 | 1.087237597 | 0.54178539  |
|         |                                                                                                 | 1.127042275 | 1.28629164  |             |             |             |             |
| YOR331C | YOR331C::YOR331C::molecular_function unknown                                                    | 1           |             |             |             |             | 0.931033192 |
|         |                                                                                                 | 1.056773027 | 0.762269315 | 0.966004721 | 1           | 0.844295338 | 0.858793997 |
|         |                                                                                                 | 0.930055163 | 0.915255836 | 1           | 0.77095676  | 0.985402119 | 1.095114267 |
|         |                                                                                                 | 0.91205666  | 1           | 1.053730275 | 0.859180365 | 0.824396378 | 1.119959589 |
|         |                                                                                                 | 1.528864506 | 1.051141337 | 1.476837046 | 1.362561342 | 1           | 1.203070897 |
|         |                                                                                                 | 1.216863946 | 1.30136496  | 1.179620081 | 1           | 1.403799604 | 1.49139823  |
|         |                                                                                                 | 1.61307039  | 1.407294743 | 1.053620933 | 1           | 1.076022534 | 0.99207541  |
|         |                                                                                                 | 1.247578889 | 0.663665677 | 1.061111124 | 1.171584964 |             |             |
| YOR333C | YOR333C::SWF5::Spore Wall Formation                                                             | 1           |             |             |             |             | 0.937351734 |
|         |                                                                                                 | 0.849304911 | 1           | 1.033046969 | 1.269413303 | 0.995153307 | 1           |
|         |                                                                                                 | 0.905501411 |             | 1.281486293 | 0.138676688 | 0.286190999 |             |
|         |                                                                                                 | 0.240677321 | 1           | 1.01240818  | 0.939778038 | 1           |             |
|         |                                                                                                 | 0.907628476 | 1.303361992 | 1           | 1.162039535 | 0.637838978 |             |
|         |                                                                                                 | 1.018988207 | 1           | 1.119280284 | 1.156763105 | 6.56718     |             |
| YOR347C | "YOR347C::PYK2::Pyruvate kinase, glucose-repressed isoform"                                     | 1           |             |             |             |             |             |
|         |                                                                                                 | 1.083757175 | 1.33087454  | 1.261820092 | 0.82650107  | 1           | 1.230691927 |
|         |                                                                                                 | 1.540111008 | 0.901618624 | 0.862766967 | 1           | 1.475200364 | 1.939084144 |
|         |                                                                                                 | 1.387865012 | 0.935134162 | 1           | 3.089387776 | 2.457359097 | 1.900539558 |
|         |                                                                                                 | 0.958975204 | 1           | 1.454842825 | 1.261060845 | 1.251530487 | 1.162458779 |
|         |                                                                                                 | 0.86393461  | 1.184556033 | 0.950163918 | 0.805686231 | 1           |             |
|         |                                                                                                 | 1.176148668 | 2.985646364 | 2.229151078 | 1.015843497 | 1.109005388 |             |
|         |                                                                                                 | 0.961543937 | 0.369957592 | 1.323482625 | 0.819584055 |             |             |
| YOR349W | "YOR349W::CIN1::Protein involved in chromosome segregation, required for microtubule stability" | 1           |             |             |             |             |             |
|         |                                                                                                 | 0.934488648 | 1           | 0.914452637 | 0.966263508 | 1.144997897 | 0.994841881 |

|             |                                                                                                                                                                                                                                                           |             |             |             |             |
|-------------|-----------------------------------------------------------------------------------------------------------------------------------------------------------------------------------------------------------------------------------------------------------|-------------|-------------|-------------|-------------|
| 0.908259735 | 0.952081391                                                                                                                                                                                                                                               | 1.097296484 | 0.947830659 | 1           | 0.737074149 |
| 0.913762789 | 1.172207743                                                                                                                                                                                                                                               | 1.20194129  | 1           | 1.026313144 | 1.877869731 |
| 1.552972703 | 0.799648277                                                                                                                                                                                                                                               | 1           | 0.881738661 | 0.907580047 | 0.727336467 |
| 0.756006452 | 1.049520737                                                                                                                                                                                                                                               | 1           | 0.796101225 | 0.800031415 | 0.853727711 |
| 0.9569565   | 1.016030271                                                                                                                                                                                                                                               | 1           | 0.78899274  | 0.916038824 | 0.978692959 |
| 0.679045569 | 0.949882282                                                                                                                                                                                                                                               | 9.366549534 |             |             |             |
| YOR349W     | "YOR349W::CIN1::Protein involved in chromosome segregation, required for microtubule stability"                                                                                                                                                           |             |             |             |             |
| 1           | 0.983963008                                                                                                                                                                                                                                               | 0.972831236 | 0.899254137 |             |             |
| 0.939192274 | 1                                                                                                                                                                                                                                                         | 0.942820138 | 0.857575872 | 1.073711391 | 0.981295649 |
| 1           | 0.911781323                                                                                                                                                                                                                                               | 0.964003623 | 1.150901794 | 1.051117557 | 1           |
| 0.877519227 | 0.937233342                                                                                                                                                                                                                                               | 1.247048786 | 1.414257982 | 1           | 1.15265173  |
| 1.982340486 | 1.656532669                                                                                                                                                                                                                                               | 1.489847542 | 1           | 0.920579114 | 1.037143907 |
| 1.023081939 | 0.945213644                                                                                                                                                                                                                                               | 1.114344793 | 1           | 0.702728971 | 0.936499571 |
| 0.943066382 | 0.952933193                                                                                                                                                                                                                                               | 1           | 0.647336458 | 0.898737426 | 0.982263469 |
| 0.954616111 | 0.84977337                                                                                                                                                                                                                                                | 1.165455518 |             |             |             |
| YOR351C     | "YOR351C::MEK1::Disp. for chr. pairing & chr. condensation seen by in situ hybrid. Required for full double strand breaks, normal length synaptonemal complexes, meiotic recomb. & spore viability. mek1 is rescued by spo13 & in early recomb. function" |             |             |             |             |
| 1           | 1                                                                                                                                                                                                                                                         |             |             |             |             |
| 1           | 1.23610677                                                                                                                                                                                                                                                | 1.437724652 | 1           | 0.737289076 |             |
| 1.46208382  | 0.215370898                                                                                                                                                                                                                                               | 0.330750968 | 0.388106831 |             |             |
| 1.109337998 |                                                                                                                                                                                                                                                           | 0.736300753 |             |             |             |
| 0.939464615 |                                                                                                                                                                                                                                                           | 3.276585098 |             |             |             |
| YOR353C     | YOR353C::YOR353C::molecular_function unknown                                                                                                                                                                                                              |             |             |             |             |
| 1           | 0.832495788                                                                                                                                                                                                                                               |             |             |             |             |
| 0.843061712 | 0.965212676                                                                                                                                                                                                                                               | 0.845956354 | 1           | 0.87222     | 0.861775724 |
| 0.956923574 | 0.804129508                                                                                                                                                                                                                                               | 1           | 0.850022637 | 0.880542363 | 0.628479868 |
| 0.956587347 | 1                                                                                                                                                                                                                                                         | 1.006898889 | 2.382770562 | 0.399616304 | 0.84702872  |
| 1           | 1.649301207                                                                                                                                                                                                                                               | 1.005286053 | 0.690805447 | 1.061003879 | 1           |
| 1.021289058 | 1.104482528                                                                                                                                                                                                                                               | 1.142225665 | 1.03210816  | 1.317107714 | 1           |
| 1.070908002 | 0.791832285                                                                                                                                                                                                                                               | 1.040533995 | 0.952411413 | 0.803587854 | 1           |
| 0.907765824 | 0.849085866                                                                                                                                                                                                                                               | 1.127721276 | 0.932248983 | 0.963685035 | 1.062131964 |
| YOL125W     | YOL125W::YOL125W::molecular_function unknown                                                                                                                                                                                                              |             |             |             |             |
| 1           | 0.864013048                                                                                                                                                                                                                                               |             |             |             |             |
| 0.714768888 | 0.906632749                                                                                                                                                                                                                                               | 0.729064008 | 1           | 0.931555703 | 0.882733597 |
| 0.823169019 | 0.774702929                                                                                                                                                                                                                                               | 1           | 0.757664367 | 0.652914451 | 0.372304556 |
| 0.867876836 | 1                                                                                                                                                                                                                                                         | 0.600372628 | 0.477919953 | 0.523779464 | 1           |
| 0.657230206 |                                                                                                                                                                                                                                                           | 1           | 1.094000377 | 1.042298008 | 1.260009514 |
| 1.559152723 | 1.232622967                                                                                                                                                                                                                                               | 1           | 0.850831916 | 0.624205444 | 0.567233014 |
| 0.949001076 | 0.431899609                                                                                                                                                                                                                                               | 1           | 0.675119951 | 0.649849697 | 0.775132911 |
| 0.707625113 | 0.578320195                                                                                                                                                                                                                                               | 0.640081149 |             |             |             |
| YOR355W     | YOR355W::GDS1::involved in nuclear control of mitochondria                                                                                                                                                                                                |             |             |             |             |
| 1           |                                                                                                                                                                                                                                                           |             |             |             |             |
| 1.263562285 | 0.893478151                                                                                                                                                                                                                                               | 1.348640418 | 0.778306893 | 1           | 1.150007788 |
| 1.291481087 | 0.781730011                                                                                                                                                                                                                                               | 0.940990843 | 1           | 1.061928343 | 0.920579225 |
| 1.031277683 |                                                                                                                                                                                                                                                           | 0.679103503 | 0.681048515 | 1           |             |
| 1           | 0.953664715                                                                                                                                                                                                                                               | 0.890589477 | 1.041185715 | 0.91357467  | 0.774493347 |
| 1           | 0.583710512                                                                                                                                                                                                                                               | 0.743029343 | 0.665823356 | 0.69828822  | 0.577847113 |
| 1           | 1.589263107                                                                                                                                                                                                                                               | 2.097160173 | 1.631640279 | 1.60131038  | 0.846728415 |
| YOL127W     | YOL127W::RPL25::Homology to E. coli L23 and rat L23a                                                                                                                                                                                                      |             |             |             |             |
| 1           |                                                                                                                                                                                                                                                           |             |             |             |             |
| 1.120596943 | 0.792765504                                                                                                                                                                                                                                               |             | 0.84795092  |             |             |
| 0.717351074 | 0.828192403                                                                                                                                                                                                                                               | 0.992112507 | 0.752842535 | 0.5016559   |             |
| 0.460725176 | 1                                                                                                                                                                                                                                                         | 1.535464844 |             |             |             |
| 0.712869645 | 1                                                                                                                                                                                                                                                         | 1.758424334 | 1.385492536 | 1           |             |
| 1.030241678 |                                                                                                                                                                                                                                                           | 3.44558039  |             |             |             |
| YOL141W     | YOL141W::PPM2::carboxy methyl transferase; homolog of PPM1                                                                                                                                                                                                |             |             |             |             |
| 1           |                                                                                                                                                                                                                                                           |             |             |             |             |
| 0.92821408  | 0.833045883                                                                                                                                                                                                                                               | 1.208888088 | 1.015519348 | 1           | 0.962519712 |
| 0.976340006 | 0.87443384                                                                                                                                                                                                                                                | 0.877539926 | 1           | 0.625322468 | 0.604409981 |
| 0.439943223 | 1.105713093                                                                                                                                                                                                                                               | 1           | 0.449696815 |             | 0.440138373 |
| 0.398145123 |                                                                                                                                                                                                                                                           | 1           | 0.745226254 | 1.008848471 |             |

|                                                                                  |                                                                    |             |             |             |             |             |
|----------------------------------------------------------------------------------|--------------------------------------------------------------------|-------------|-------------|-------------|-------------|-------------|
|                                                                                  | 1.259122222                                                        | 0.984995669 | 1           | 0.565714074 | 0.470526842 | 0.380245095 |
|                                                                                  | 1.145192735                                                        | 0.362876968 | 1           | 0.42109648  | 0.637760475 | 0.90112772  |
|                                                                                  | 0.787875924                                                        | 0.454820729 | 0.956181415 |             |             |             |
| YOL143C                                                                          | YOL143C::RIB4::catalyzes synthesis of immediate precursor to       |             |             |             |             |             |
| riboflavin                                                                       | 1                                                                  | 0.993320771 | 1.38839426  | 0.959408143 | 1.319561424 | 1           |
|                                                                                  | 0.880523071                                                        | 1.166737576 | 1.44209029  | 1.112980984 | 1           | 0.956858277 |
|                                                                                  | 0.972459516                                                        | 1.30593976  | 0.931589964 | 1           | 1.120919171 | 0.855728835 |
|                                                                                  | 1.060184005                                                        | 1.853438141 | 1           | 1.739294234 | 2.166308834 | 2.517320877 |
|                                                                                  | 1.878054361                                                        | 1           | 1.066859668 | 1.085875976 | 1.030239393 | 0.788873926 |
|                                                                                  | 0.816635893                                                        | 1           | 1.392010612 | 1.416074661 | 1.051005397 | 1.085511072 |
|                                                                                  | 2.1114727                                                          | 1           | 0.848602213 | 1.213114191 | 0.89199351  | 1.451891227 |
|                                                                                  | 0.775936506                                                        | 1.712720518 |             |             |             |             |
| YOL145C                                                                          | YOL145C::CTR9::CTR9 is required for normal CLN1 and CLN2 G1 cyclin |             |             |             |             |             |
| expression                                                                       | 0.918540092                                                        | 1.029491454 | 1.250087262 | 0.986800768 |             |             |
|                                                                                  | 1.098130302                                                        | 1.045659688 | 1.02818451  | 0.811561995 | 0.94280423  |             |
|                                                                                  | 1.08944848                                                         | 0.865907402 | 1.074929971 | 1           | 0.997497334 | 0.821105441 |
|                                                                                  | 0.806652637                                                        | 0.552742644 | 1           | 0.903910664 | 0.627275132 | 0.676454615 |
|                                                                                  | 0.662001137                                                        | 1           | 1.129552955 | 1.06709099  | 1.172580874 | 1.250685819 |
|                                                                                  | 1.277532427                                                        | 1           | 1.17016515  | 0.943420273 | 0.787371194 | 1.0105737   |
|                                                                                  | 0.53510806                                                         | 1           | 0.95566737  | 0.749468422 | 0.849089984 | 0.854874261 |
|                                                                                  | 0.823385485                                                        |             |             |             |             |             |
| YDR540C                                                                          | YDR540C::YDR540C::molecular_function unknown                       |             |             |             |             |             |
|                                                                                  | 1                                                                  | 1.74582913  |             |             |             |             |
|                                                                                  | 1.514368551                                                        | 1.397308422 | 1.766064349 | 1           | 1.511065223 | 1.42364305  |
|                                                                                  | 1.670641367                                                        | 1.449113714 | 1           | 1.564584279 | 1.437025607 | 1.802929349 |
|                                                                                  | 1.130868902                                                        | 1           | 0.897437707 | 0.851529825 | 1           | 0.741635308 |
|                                                                                  |                                                                    | 1           | 0.984658275 | 1.086765282 | 1.316041876 | 1.25332976  |
|                                                                                  | 1.141202566                                                        | 1           | 0.786964267 | 1.04874501  | 1.23623122  | 1.347828651 |
|                                                                                  | 1.393622334                                                        | 1           | 1.016955179 | 1.082480234 | 1.216091427 | 1.315408874 |
|                                                                                  | 1.570728948                                                        | 1.39486908  |             |             |             |             |
| YOL147C                                                                          | YOL147C::PEX11::May promote peroxisomal proliferation by           |             |             |             |             |             |
| participating in peroxisomal elongation or fission or segregation of peroxisomes |                                                                    |             |             |             |             |             |
| to daughter cells                                                                | 1                                                                  | 2.079123268 | 1.532943504 | 1.414275884 | 1.246036704 | 1           |
|                                                                                  | 1.637454977                                                        | 1.30354127  | 1.659002265 | 1.634277735 | 1           | 1.676656611 |
|                                                                                  | 1.415350034                                                        | 1.550648461 | 1.645300967 | 1           | 1.783799984 | 2.074057976 |
|                                                                                  | 1.567782555                                                        | 1.725709956 | 1           | 1.168612751 | 1.290960553 | 1.279842357 |
|                                                                                  | 1.411243609                                                        | 1           | 1.133523666 | 0.976313629 | 1.066015945 | 1.191223839 |
|                                                                                  | 0.743974455                                                        | 1           | 0.79591041  | 0.938144242 | 0.691602612 | 0.702974743 |
|                                                                                  | 0.911354139                                                        | 1           | 1.065968145 | 1.001227573 | 0.930932434 | 1.121556337 |
|                                                                                  | 0.867441673                                                        | 1.248639823 |             |             |             |             |
| YDR542W                                                                          | YDR542W::YDR542W::molecular_function unknown                       |             |             |             |             |             |
|                                                                                  | 1                                                                  | 1.609648145 |             |             |             |             |
|                                                                                  | 1.82729997                                                         | 1.409257546 | 1.894165627 | 1           | 1.57224785  | 1.334702325 |
|                                                                                  | 1.781311101                                                        | 1           | 1.683000058 | 1.759686344 | 2.636827776 | 1.654237691 |
|                                                                                  | 1.398936722                                                        | 1.039476536 | 1.516693358 | 1.62071693  | 1           | 2.182683385 |
|                                                                                  | 2.078622009                                                        | 1.380989149 | 1.245115706 | 1.318934604 | 1.161874876 |             |
|                                                                                  | 1.000580707                                                        | 0.987491852 | 1           | 1.08159088  | 1.752773747 | 1.825788681 |
|                                                                                  | 1.319829368                                                        | 2.11527649  | 1           | 1.115971168 | 1.640423962 | 1.21506268  |
|                                                                                  | 1.488428256                                                        | 1.312490094 | 1.514829537 |             |             |             |
| YCLX09W                                                                          | YCLX09W                                                            |             |             |             |             |             |
|                                                                                  | 1                                                                  | 1.196049216 | 1.042229983 | 1.070437436 | 0.911656651 | 1           |
|                                                                                  | 1.270845261                                                        | 1.226769547 | 0.98391017  | 1           | 1.566747181 | 1.013648192 |
|                                                                                  | 1.117533504                                                        | 0.824240912 | 1           | 1.24902129  | 0.700875643 | 1.157523587 |
|                                                                                  | 0.599035857                                                        | 1           | 1.338259195 | 1.33365678  | 0.964788367 | 0.712123234 |
|                                                                                  | 0.937226797                                                        | 0.840926328 | 1.277475077 | 1.512010507 | 1.317608618 | 1           |
|                                                                                  | 0.60621422                                                         | 0.328930118 | 0.57181943  | 0.656670385 | 0.393482364 | 1           |
|                                                                                  | 0.726078752                                                        | 0.477800999 | 1.063722761 | 0.53871856  | 0.875624    |             |
| YOL149W                                                                          | YOL149W::DCP1::Decapping protein involved in mRNA degradation      |             |             |             |             |             |
|                                                                                  | 1                                                                  |             |             |             |             | 1           |
|                                                                                  | 0.892505891                                                        | 1.128716464 | 0.958179888 | 1.608522004 | 1           | 0.884000096 |
|                                                                                  | 0.810096072                                                        | 1.152223831 | 1.07093083  | 1           | 0.853527008 | 0.905278472 |

|                         |                                                                      |             |             |             |             |             |
|-------------------------|----------------------------------------------------------------------|-------------|-------------|-------------|-------------|-------------|
| 0.93347506              | 1.033406036                                                          | 1           | 0.926739179 | 0.38005643  | 0.52724618  |             |
| 1.091238852             | 1                                                                    | 1.558593981 | 1.187173729 | 1.139890895 | 1.109364694 | 1           |
| 0.752756744             | 0.812176135                                                          | 0.465821005 | 0.557011226 | 0.943603831 | 1           |             |
| 1.208601853             | 1.431332559                                                          | 0.91046956  | 1.264914072 | 2.165358657 | 1           |             |
| 1.153999039             | 1.095757003                                                          | 1.00307988  | 1.81137716  | 1.310353648 | 0.924658939 |             |
| YDR544C                 | YDR544C::YDR544C::molecular_function                                 | unknown     | 1           | 1.173929123 |             |             |
| 1.131680131             | 0.924729733                                                          | 0.883229997 | 1           | 1.097600891 | 1.042428047 |             |
| 0.92831385              | 0.940995928                                                          | 1           | 1.095608372 | 0.995767088 | 1.399347122 |             |
| 0.787242785             | 1                                                                    | 0.848137293 | 0.655815695 | 1.001492227 | 0.831779452 | 1           |
| 0.751227148             | 1.27947974                                                           | 0.892393625 | 0.843533112 | 1           | 0.880450241 |             |
| 0.771943024             | 0.773156505                                                          | 0.936058065 | 1           | 0.748999215 | 0.712281707 |             |
| 1.019412937             | 1.050438795                                                          | 0.915673644 | 1           | 0.747795656 | 0.719210356 |             |
| 0.916843386             | 0.827721894                                                          | 0.765945262 | 0.795942198 |             |             |             |
| YCLX11W                 | YCLX11W                                                              | 1           | 1.38267359  | 1.136103265 | 0.631766614 | 0.707491624 |
| 1.072005524             | 0.935895408                                                          | 0.687025782 | 0.68879416  | 1           | 1.76453246  |             |
| 1.60791706              | 1.736268662                                                          | 0.491790965 | 1           | 0.970701015 | 0.73277358  |             |
| 0.849573687             | 0.65940879                                                           | 1           | 0.770543748 | 1.108571723 | 0.744370287 |             |
| 0.29498668              | 1                                                                    | 1.151639772 | 1.087116092 | 1.102864149 | 1.172485991 |             |
| 0.944394813             | 1                                                                    | 0.824678729 | 1.023857821 | 0.695057504 | 0.651120474 |             |
| 0.911593572             | 1                                                                    | 1.035324772 | 1.203350742 | 1.124073992 | 1.119458429 |             |
| 1.349174279             | 0.805574095                                                          |             |             |             |             |             |
| YOL151W                 | YOL151W::GRE2::induced by osmotic stress; similar to dihydroflavonol |             |             |             |             |             |
| 4-reductase from plants | 1                                                                    | 1.046484926 | 1.116200943 | 1.293285202 | 1.234635522 | 1           |
| 1.261369033             | 1.313714071                                                          | 1.423537326 | 1.484053677 | 1           | 5.288673245 |             |
| 4.942499516             | 2.280704427                                                          | 1.654042791 | 1           | 12.86359554 | 13.86784005 |             |
| 9.822903724             | 6.927890502                                                          | 1           | 13.09137836 | 7.936479189 | 8.835316892 |             |
| 7.043886765             | 1                                                                    | 3.060747335 | 4.475498851 | 2.806617564 | 0.865235767 |             |
| 0.672375906             | 1                                                                    | 3.638409899 | 4.468690466 | 1.942062146 | 0.516381211 |             |
| 0.229668957             | 1                                                                    | 3.787629844 | 3.763441762 | 1.333483398 | 0.416015892 |             |
| 0.394721718             | 5.345684537                                                          |             |             |             |             |             |
| YEL013w                 | YEL013w::VAC8::An armadillo repeat-containing protein localized on   |             |             |             |             |             |
| the vacuolar membrane   | 1                                                                    | 1.100697007 | 1.018959935 | 1.161155184 | 0.726501165 | 1           |
| 1.420481692             | 1.3234529                                                            | 0.787704577 | 1           | 1.191314805 | 1.128459676 |             |
| 0.815967565             | 0.867208924                                                          | 1           | 1.763639022 | 1.399867334 | 1.717829062 |             |
| 1.193315616             | 1                                                                    | 7.230024433 | 9.473201986 | 8.473848148 | 1           |             |
| 0.908607399             | 0.954874029                                                          | 1.131281717 | 1.076767359 | 0.852769413 | 1           |             |
| 0.98867734              | 0.776624398                                                          | 1.10475752  | 0.645196796 | 0.525475289 | 1           |             |
| 1.085106522             | 0.821301137                                                          | 0.985353896 | 0.821849128 | 0.948810571 | 0.687364863 |             |
| YCR013C                 | YCR013C::YCR013C::molecular_function                                 | unknown     | 1           | 1.619726663 |             |             |
| 1.325949584             | 0.954059372                                                          | 1.383241709 | 1           | 1.098035463 | 0.974491075 |             |
| 1.249545037             | 1.264840497                                                          | 1           | 1.233391891 | 1.212985546 | 2.440862783 |             |
| 0.769913069             | 1                                                                    | 1.725681284 | 1.547039438 | 2.813298704 | 1.324039598 | 1           |
| 1.999033482             | 3.319960285                                                          | 4.910835508 | 1.210640816 | 1           | 1.283419931 |             |
| 1.367994668             | 2.285600227                                                          | 1.431515957 | 1.049919367 | 1           | 1.449778143 |             |
| 2.480019288             | 1.856686409                                                          | 1.120097105 | 1.611437428 | 1           | 1.355188885 |             |
| 2.08253285              | 1.264084361                                                          | 1.51131238  | 1.529744542 | 2.147905732 |             |             |
| YOL165C                 | YOL165C::AAD15::high degree of similarity with the AAD of P.         |             |             |             |             |             |
| chrysosporium           | 1                                                                    | 1.405585405 | 1.332149363 | 1.05194018  | 1.621096932 | 1           |
| 1.100871476             | 0.942222473                                                          | 1.613670615 | 1.48226272  | 1           | 3.564773534 |             |
| 3.95929699              | 2.567146914                                                          | 1.156557702 | 1           | 2.766831973 | 2.699903567 |             |
| 3.739901088             | 2.77560525                                                           | 1           | 3.624390099 | 7.177820237 | 6.180518886 |             |
| 1.800030415             | 1                                                                    | 2.203464463 | 3.987027064 | 3.897352371 | 1.183085706 |             |
| 0.962336131             | 1                                                                    | 2.574076612 | 7.029875177 | 6.250882597 | 5.297335333 |             |
| 2.743535066             | 1                                                                    | 3.5562556   | 8.151449918 | 4.43744473  | 1.76244572  |             |
| 1.338263989             | 2.801996842                                                          |             |             |             |             |             |
| YEL015w                 | YEL015w::YEL015w::molecular_function                                 | unknown     | 1           | 0.729248957 |             |             |
| 0.872753497             | 0.848022029                                                          | 0.849868686 | 1           | 0.872999756 | 0.847877071 |             |

|             |                                                                                                                                                                              |             |             |             |             |
|-------------|------------------------------------------------------------------------------------------------------------------------------------------------------------------------------|-------------|-------------|-------------|-------------|
| 0.838460561 | 0.769292876                                                                                                                                                                  | 1           | 0.684342035 | 0.785374171 | 0.589911974 |
| 0.844438085 | 1                                                                                                                                                                            | 0.666480308 | 0.614043646 | 0.550427978 | 0.865670855 |
| 0.839482634 | 1.18798055                                                                                                                                                                   | 1.238774981 | 0.926059506 | 1           | 1.083163595 |
| 0.952389917 | 0.8863153                                                                                                                                                                    | 1.092961441 | 1           | 1.067622747 | 0.862015929 |
| 1.020606509 | 0.893728188                                                                                                                                                                  | 0.756111786 | 1           | 1.01759223  | 0.846092363 |
| 1.071943788 | 1.033952653                                                                                                                                                                  | 0.971847248 | 1.01484825  |             |             |
| YCR015C     | YCR015C::YCR015C::molecular_function                                                                                                                                         | unknown     | 1           | 0.878200281 |             |
| 0.906209719 | 1.137826858                                                                                                                                                                  | 0.971070787 | 1           | 0.9878506   | 0.987818373 |
| 0.95528093  | 1                                                                                                                                                                            | 0.945008191 | 1.012335992 | 0.749904502 | 1.266366788 |
| 0.821822243 |                                                                                                                                                                              | 0.624025462 | 0.873314852 | 1           | 1.278448736 |
| 1.177086318 | 1.175901072                                                                                                                                                                  | 1           | 0.864120014 | 1.016487375 | 0.851467616 |
| 0.919976243 | 1.182516287                                                                                                                                                                  | 1           | 0.944037993 | 0.958819872 | 0.896466222 |
| 1.003898996 | 1                                                                                                                                                                            | 0.74782283  | 0.803985418 | 0.968856896 | 0.56662166  |
| 0.835345293 |                                                                                                                                                                              |             |             |             |             |
| YOR001W     | YOR001W::RRP6::Ribosomal RNA Processing                                                                                                                                      |             | 1           | 0.832597435 |             |
| 0.764365614 | 0.938513422                                                                                                                                                                  | 0.849015332 | 1           | 0.822160804 | 0.823680245 |
| 0.8684579   | 0.844923314                                                                                                                                                                  | 1           | 0.609927423 | 0.486658632 | 0.419759864 |
| 0.838524857 | 1                                                                                                                                                                            | 0.527816747 | 0.305189599 | 0.624133878 | 1           |
| 0.629542681 | 0.809114719                                                                                                                                                                  | 0.446437474 |             | 1           | 0.929253341 |
| 0.951213471 | 1.115678563                                                                                                                                                                  | 1.108307658 | 1           | 0.64816067  | 0.499924657 |
| 0.364193542 | 0.727306164                                                                                                                                                                  | 0.462587136 | 1           | 0.801479676 | 0.692914867 |
| 0.830709454 | 0.841456258                                                                                                                                                                  | 0.415327337 | 1.377356512 |             |             |
| YCR017C     | YCR017C::CWH43                                                                                                                                                               |             | 1           | 2.040084547 | 1.679976862 |
| 1.882841218 | 1.898347399                                                                                                                                                                  |             | 1           | 1.765247404 | 1.939081704 |
| 1.681723711 |                                                                                                                                                                              |             |             |             |             |
| 1.013186906 | 0.874641552                                                                                                                                                                  | 0.984713605 | 1.038446664 | 1.064397141 | 1           |
| 0.763280764 | 1.29366566                                                                                                                                                                   | 0.813604274 | 0.951967455 | 1.050037362 | 1           |
| 1.0405074   | 1.028177943                                                                                                                                                                  | 1.331154214 | 1.073565167 | 1.140062488 |             |
| YEL018w     | YEL018w::EAF5::Esalp-Associated Factor-5                                                                                                                                     |             | 1           | 1.199259548 |             |
| 1.351152768 | 1.14111228                                                                                                                                                                   | 1.693171952 | 1           | 1.141661694 | 1.063256376 |
| 1.227254963 | 1.48187602                                                                                                                                                                   | 1           | 0.869191409 | 0.999904226 | 1.230227939 |
| 1.128804385 | 1                                                                                                                                                                            | 0.906170371 | 0.828381836 | 0.956221982 | 1           |
| 1.049564621 | 1.311796397                                                                                                                                                                  | 0.798370366 | 1.155275992 | 1           | 0.773635455 |
| 0.82139846  | 0.58041803                                                                                                                                                                   | 0.635382042 | 0.85245878  | 1           | 0.853135737 |
| 1.262897361 | 1.000864799                                                                                                                                                                  | 1.135498059 | 1.254061218 | 1           | 1.203976576 |
| 1.134659502 | 1.107570877                                                                                                                                                                  | 1.763674539 | 1.23875061  | 1.076141872 |             |
| YCR019w     | YCR019w::MAK32::Protein necessary for structural stability of L-A double-stranded RNA-containing particles                                                                   |             | 1           | 0.981517196 | 1.0580886   |
| 1.077270268 | 0.980992405                                                                                                                                                                  | 1           | 0.979417272 | 1.053515052 | 1.250955366 |
| 1.08605616  | 1                                                                                                                                                                            | 1.271505074 | 1.390129961 | 1.326443399 | 1.288760439 |
| 2.211725865 |                                                                                                                                                                              | 1.689375404 | 1.376444682 | 1           | 2.155226353 |
| 1.014272919 | 1                                                                                                                                                                            | 1.065874893 | 1.217691841 | 1.111596273 | 0.854810437 |
| 1.060790159 | 1                                                                                                                                                                            | 1.130184555 | 1.165800904 | 1.231742345 | 1.26562978  |
| 0.976720943 |                                                                                                                                                                              | 1.006740511 | 0.89021277  | 0.930080392 | 0.881732321 |
| 1.150547545 | 0.978947659                                                                                                                                                                  |             |             |             |             |
| YEL020c     | YEL020c::YEL020C::molecular_function                                                                                                                                         | unknown     | 1           | 0.773023128 |             |
| 0.808226371 | 0.912866096                                                                                                                                                                  | 0.625950298 | 1           | 0.947390726 | 1.018475193 |
| 0.769374635 | 0.821951507                                                                                                                                                                  | 1           | 0.796806696 | 1.006140733 | 0.956929318 |
| 0.961213717 | 1                                                                                                                                                                            | 1.770369746 | 1.384464308 | 1.779765865 | 1.728921674 |
| 1.361349682 | 1.275946732                                                                                                                                                                  |             | 1.27786729  | 1           | 1.022603215 |
| 1.341879444 | 1.052396682                                                                                                                                                                  | 1.177548149 | 1           | 1.159978256 | 1.096590092 |
| 1.329108624 | 1.315213883                                                                                                                                                                  | 0.588041288 | 1           | 0.996015978 | 0.88910019  |
| 1.010136032 | 0.937256236                                                                                                                                                                  | 1.11823976  | 1.019226366 |             |             |
| YCR020Ca    | "YCR020Ca::MAK31::Like Sm protein; member of the Sm protein family, though slightly divergent because Mak31/Lsm9p does not contain a glycine or cysteine at amino acid 107." |             | 1           | 1.228146004 | 1.66396802  |
| 2.056574815 | 1                                                                                                                                                                            | 1.117382373 | 1.084116527 | 1.791765544 | 1.614568321 |



|             |                                                                                                                                                                                                                    |             |             |             |             |
|-------------|--------------------------------------------------------------------------------------------------------------------------------------------------------------------------------------------------------------------|-------------|-------------|-------------|-------------|
| 1.198961302 | 1.553353462                                                                                                                                                                                                        | 1.392081325 | 1.364752795 | 1           | 0.875746434 |
| 0.48044703  | 0.567835702                                                                                                                                                                                                        | 1.290179645 | 1           | 1.969608868 | 2.411936766 |
| 1.543788983 | 1                                                                                                                                                                                                                  | 0.97480977  | 1.251228725 | 0.860892024 | 1.067611056 |
| 1.137346075 | 1                                                                                                                                                                                                                  | 0.922853788 | 1.735014538 | 1.43031799  | 1.42603579  |
| 2.491167464 | 1                                                                                                                                                                                                                  | 0.98945263  | 1.296227892 | 0.992447768 | 1.816944164 |
| 1.057463027 | 1.575247598                                                                                                                                                                                                        |             |             |             |             |
| YEL022w     | YEL022w::GEA2::Guanine-nucleotide Exchange on ARF                                                                                                                                                                  |             |             |             | 1           |
| 1.111276142 | 0.916255169                                                                                                                                                                                                        | 1.35875725  | 1.055976083 | 1           | 1.163381918 |
| 1.283228055 | 0.937613639                                                                                                                                                                                                        | 0.81222411  | 1           | 1.081839228 | 1.083597015 |
| 0.562652224 | 1.095788908                                                                                                                                                                                                        | 1           | 1.032823197 | 0.690498124 | 0.744645003 |
|             | 0.505610882                                                                                                                                                                                                        | 0.523485719 | 1           | 0.818485168 | 0.99978002  |
| 0.968564156 | 0.967470398                                                                                                                                                                                                        | 1.042012372 | 1           | 1.140153246 | 0.791924319 |
| 1.027527312 | 0.859603021                                                                                                                                                                                                        | 0.371484985 | 1           | 1.104156258 | 0.822356112 |
| 0.823361548 | 0.811492339                                                                                                                                                                                                        | 0.745837956 | 0.703126049 |             |             |
| YEL036c     | "YEL036c::ANP1::Mannan 8; Protein of the endoplasmic reticulum with a role in retention of glycosyltransferases in the Golgi, also involved in osmotic sensitivity and resistance to aminonitrophenyl propanediol" |             |             |             | 1           |
| 0.727886368 | 0.656844482                                                                                                                                                                                                        | 0.856509648 | 1           | 0.965001957 | 0.881277123 |
| 0.735134041 | 0.822494965                                                                                                                                                                                                        | 1           | 0.766562    | 0.670913839 | 0.570513855 |
| 0.869218705 | 1                                                                                                                                                                                                                  | 0.955172645 | 0.701304776 | 0.677159348 | 0.678293054 |
| 0.80880139  | 0.791243673                                                                                                                                                                                                        | 0.401498648 | 1           | 0.892325613 | 0.858871445 |
| 0.934498632 | 0.989558741                                                                                                                                                                                                        | 1.070787601 | 1           | 1.031154601 | 0.789962786 |
| 0.858199346 | 0.806823127                                                                                                                                                                                                        | 0.554628324 | 1           | 0.88118671  | 0.740974764 |
| 0.880508476 | 0.923491842                                                                                                                                                                                                        | 0.875624    |             |             |             |
| YCR022C     | YCR022C::YCR022C::molecular_function unknown                                                                                                                                                                       |             |             |             | 1           |
| 1.24943886  | 1.169552534                                                                                                                                                                                                        | 1.304457562 | 1           | 1.073679244 | 1.11016761  |
| 1.19006261  | 1.231190465                                                                                                                                                                                                        | 1           | 1.081496555 | 1.100332583 | 1.218304826 |
| 1.065180341 | 1                                                                                                                                                                                                                  | 0.915682437 | 0.905429584 | 0.907477613 | 1.212797913 |
| 1.455399233 | 1.442996253                                                                                                                                                                                                        | 1.634744774 | 0.794910827 | 1           | 0.796050739 |
| 1.053692734 | 0.800375805                                                                                                                                                                                                        | 0.79524089  | 0.961403599 | 1           | 1.203036367 |
| 1.109092581 | 1.008241532                                                                                                                                                                                                        | 0.680892829 | 1.190219968 | 1           | 0.987859329 |
| 0.912515277 | 0.880630283                                                                                                                                                                                                        | 1.165560839 | 1.145855104 | 0.940420177 |             |
| YCR034w     | "YCR034w::FEN1::Involved in synthesis of 1,3-beta-glucan, a component of the cell wall, and elongation of fatty acids up to 24 carbons"                                                                            |             |             |             | 1           |
| 1.552221289 | 0.929519124                                                                                                                                                                                                        | 1.004438538 | 1.017978083 | 1           | 1.091032894 |
| 0.877858894 | 0.855171716                                                                                                                                                                                                        | 0.907256416 | 1           | 1.113743905 | 0.611811782 |
| 0.480759217 | 0.777817665                                                                                                                                                                                                        | 1           | 0.820181522 | 0.396337104 | 0.38158279  |
| 0.594061304 | 1                                                                                                                                                                                                                  | 0.514708964 | 0.299976982 | 0.269275069 | 0.232530989 |
| 0.918780358 | 0.67979395                                                                                                                                                                                                         | 0.704755028 | 1.024020599 | 0.805673228 | 1           |
| 0.670984783 | 0.767831036                                                                                                                                                                                                        | 0.377194617 | 0.430298545 | 0.646880923 | 1           |
| 1.04764272  | 0.829206942                                                                                                                                                                                                        | 0.800962141 | 1.343207513 | 0.742198553 | 1.01309692  |
| YCR036w     | YCR036w::RBK1::ribokinase                                                                                                                                                                                          |             |             |             | 1           |
| 1.067276984 | 1.126438239                                                                                                                                                                                                        | 1           | 0.997339228 | 1.037640767 | 1.290688285 |
| 1.305513679 | 1                                                                                                                                                                                                                  | 0.920889028 | 1.255081386 | 1.646365644 | 1.081658884 |
| 1.545628715 | 1.22687335                                                                                                                                                                                                         | 1.553300015 | 1.922413712 | 1           | 1.839038832 |
| 2.190235925 | 2.723069937                                                                                                                                                                                                        | 1.517468009 | 1           | 0.915554952 | 1.398020341 |
| 1.395813859 | 1.255297669                                                                                                                                                                                                        | 1.31080361  | 1           | 1.112476448 | 1.089891766 |
| 1.447105406 | 0.955734849                                                                                                                                                                                                        | 1.018715687 | 1           | 0.958476871 | 0.887820938 |
| 0.746346532 | 0.868057257                                                                                                                                                                                                        | 0.985016656 | 1.031485049 |             |             |
| YOR357C     | YOR357C::GRD19::Functions in Golgi retention.                                                                                                                                                                      |             |             |             | 1           |
| 0.97917489  | 0.786794222                                                                                                                                                                                                        | 1.139090796 | 1           | 0.801215943 | 0.876426744 |
| 1.086252205 | 1.119604998                                                                                                                                                                                                        | 1           | 0.839170761 | 0.939656965 | 1.414220089 |
| 0.948018787 | 1                                                                                                                                                                                                                  | 1.45584617  | 1.051637917 | 1.320731477 |             |
| 1.026795328 | 0.830836684                                                                                                                                                                                                        | 0.96317591  | 0.446812089 | 1           | 0.790535722 |
| 1.31738456  | 0.934606298                                                                                                                                                                                                        | 0.763256678 | 0.986609276 | 1           | 0.921797717 |
| 1.235039911 | 1.390460418                                                                                                                                                                                                        | 1.23737821  | 1.827021479 | 1           | 1.167046741 |
| 1.52058075  | 0.942269076                                                                                                                                                                                                        | 1.461864816 | 1.736394305 | 1.467545823 |             |

YOR371C "YOR371C::GPB1::Gpa2 interacting partner; Homolog of GPB2<br>
 Functions, with Gpb2, in the cAMP-PKA pathway via interactions with Gpa2 and
 another unknown target." 1 0.952845135 0.694974613 1.076288768  
 0.572850301 1 0.973616265 1.096246511 0.621633079 0.592031749 1  
 1.319129314 1.010797264 1.021999351 1 1.080534918 0.551065923  
 0.907216694 1 0.584488957 1 1.076430735  
 1.046192104 1.342717233 1.137794593 0.932269392 1 1.024107137  
 0.863890507 0.978187714 0.803617515 0.754136929 1 0.905443803  
 1.235957452 1.183209434 1.156301379 0.993827102  
 YOR373W YOR373W::NUD1::Spindle pole body protein 0.993648586  
 0.965717653 0.874390178 0.750869242 0.990375527 0.96108425  
 0.8281125 0.80041083 1.115209614 1.01858147 0.826176182  
 0.952556287 1 1.047622887 1.06122946 0.964649607  
 0.785812739 0.922530662 0.673617345 1 0.922565328 0.93986973  
 0.895576728 0.949524045 1.00289589 1 0.889977602 0.76983972  
 0.750800818 0.940128124 0.622686483 0.879477612 0.824588107  
 1.0739717 0.821614158 1.056433244 0.857235872  
 YOR375C YOR375C::GDH1::NADP-specific glutamate dehydrogenase 1  
 1.97371755 1.623977023 1.224000478 1.409615768 1 1.55639031  
 1.274774214 1.43585504 1 1.828015742 1.78540212 1.881286486  
 1.438516838 1 1.107112766 0.562519178 1.189502707 1  
 1.031057841 1.447786282 1 1.09046418 0.880581097  
 1.538026397 1.491662136 0.96553922 1 1.102026217 1.494777498  
 1.076036475 1.363221849 0.834026615 1.535046313 0.906098497  
 1.311808007 0.779972412  
 YOR377W YOR377W::ATF1::Alcohol acetyltransferase 1 0.809031946  
 0.633439956 0.763060583 0.555354661 1 0.736449896 0.740998188  
 0.489601432 0.516682126 1 0.827469913 0.68604032 0.472095486  
 0.848334344 1 1.103453298 0.999698308 1.248726913 0.914647555 1  
 1.105038719 0.89592501 1.215525183 0.818417896 1 1.250156641  
 1.058687672 1.136193802 1.672840271 1.540447104 1 1.084033364  
 0.933884511 0.934830694 0.677285198 0.767636774 1 1.051167724  
 0.846618235 0.658603827 0.494012704 0.668550957 0.919405158  
 YOR379C YOR379C::YOR379C::molecular\_function unknown 1.097076684  
 1.001021031 0.845829238 0.941946381 0.880902349 0.940735772  
 0.942898758 0.86564377 0.867327932 0.905638622 1.276601676  
 1.018883011 1 0.521002092 1  
 1.132833011 1.180208193 1.061281395 1 1.102047625 1.078298426  
 1.333335642 1.503357092 0.892797656 1 0.678940225 1.134930942  
 0.858226135 0.395498845 0.664443114 11.78765019  
 YOR381W YOR381W::FRE3::similar to FRE2 1 1.310773646 0.822972113  
 1.119372375 0.987649763 1 1.146200364 1.177823795 1.024425148  
 1.006107805 1 2.012631523 1.90132137 1.640510824 0.985134235  
 1.436094772 1.019096554 0.465666807  
 2.210445236 2.210703589 2.409483129 1.169337945 1.532202021 1  
 2.005301197 1.899512192 1.772170562 1.095459547 0.37728385 1  
 1.922599575 1.666086834 1.078803123 0.220711073 1.016507898 14.50996456  
 YPL001W YPL001W::HAT1::histone acetyltransferase 0.892683104  
 0.89397216 0.925824898 1.257975132 0.800291224 0.738112694  
 1.070583877 1.003611063 0.788483309 0.815499836 0.82267046  
 1.083740816 0.890695228 1.145372053 0.939265966 1.170379464 1  
 0.758862593 0.956139907 1.008835871 1 0.806357159 0.682899916  
 0.745853979 0.95168706 1 0.864160144 0.992241068 0.93973349  
 0.894596894 1.311659205 1 0.856422594 1.091879183 1.08104959  
 1.043318273 1.079920845 9.405952681  
 YPL003W YPL003W::ULA1::Required for activation of RUB1 (ubiquitin-like
 protein) together with UBA3. Related to AOS1 and to N-terminus of UBA1.

Collaborates with UBC12 in conjugation of RUB1 to other proteins. Required for modification of CDC53/cullin with RUB1

|             |                                                                                 |             |             |              |             |
|-------------|---------------------------------------------------------------------------------|-------------|-------------|--------------|-------------|
|             | 1                                                                               | 1.203192334 | 1.147196201 |              |             |
| 1.117288512 | 1.346328178                                                                     | 1           | 1.131113373 | 1.145979266  | 1.414688505 |
| 1.144608999 | 1                                                                               | 1.117957325 | 1.401842556 | 1.867458007  | 1.091854775 |
| 1.637313077 | 1.5339302                                                                       | 2.224026665 | 1.728654584 | 1            | 2.350298241 |
| 2.503049847 | 2.514065012                                                                     | 1.408850071 | 1           | 1.278115373  | 1.368992652 |
| 1.355417908 | 0.899194096                                                                     | 1.249101631 | 1           | 1.264784985  | 1.37047411  |
| 1.705674895 | 0.868218591                                                                     | 1           | 1.164303897 | 1.14844418   | 1.108680383 |
| 0.872546145 | 1.270760148                                                                     | 1.307306659 |             |              |             |
| YOR003W     | YOR003W::YSP3::subtilisin-like protease III                                     | 1           | 1.338350764 |              |             |
| 1.20023595  | 1.281524968                                                                     | 1.279605486 | 1           | 1.266029213  | 1.459869706 |
| 1.246949852 | 1.363810303                                                                     | 1           | 1.076571825 | 1.698337171  | 2.014595587 |
| 1.356409501 | 1                                                                               | 1.700868139 | 3.699254852 | 3.079582084  | 1           |
| 2.426057426 | 5.198371392                                                                     | 4.261287324 | 2.40904247  | 1            | 1.112489355 |
| 1.122056048 | 1.258699071                                                                     | 1.156053645 | 1.166517653 | 1            | 0.989167612 |
| 1.269294733 | 1.114195618                                                                     | 1.181425057 | 1.20482083  | 1            | 0.982694602 |
| 1.115564505 | 0.915991687                                                                     | 1.113704624 | 0.932539819 | 1.621655646  |             |
| YPL005W     | YPL005W::YPL005W::molecular_function unknown                                    | 1           | 1.488051813 |              |             |
| 1.446318838 | 1                                                                               | 1.547865789 | 1.457652726 | 1.281415342  | 1           |
| 1.469409754 | 1.462669812                                                                     | 1.663888917 | 1.438412905 |              |             |
|             |                                                                                 | 1           | 0.999130906 | 1.087325215  | 1.780536477 |
| 0.900821831 | 1.104198263                                                                     | 1           | 3.595245672 | 4.186397088  |             |
| 3.094981524 | 1                                                                               | 1.672555518 | 2.814247777 | 2.793723646  | 1.417166591 |
| 1.22930076  |                                                                                 |             |             |              |             |
| YOR005C     | YOR005C::DNL4::DNA ligase IV homolog                                            | 1           | 1.109208641 |              |             |
| 1.155200141 | 1.273329021                                                                     | 1           | 1.198262659 | 1.257860414  |             |
| 1.348590506 | 1                                                                               | 1.026585048 | 1.209985848 | 1.280552228  | 1.373628655 |
| 1.176521582 | 1.293496174                                                                     |             | 0.450532623 | 0.4942528    |             |
| 1           | 1.089993871                                                                     | 1.083924135 | 1.25752069  | 1.494154024  | 1.280094996 |
| 0.91464644  | 0.784553216                                                                     | 0.890199086 | 1.091549172 | 0.728332159  | 1           |
| 0.730302977 | 0.713799867                                                                     | 0.697724007 | 0.701252024 | 0.751324421  | 0.608558674 |
| YOR007C     | YOR007C::SGT2::small glutamine-rich tetratricopeptide repeat containing protein | 1           | 1.233876543 | 1.123482394  | 1.541475458 |
| 1.211560663 | 1.254602317                                                                     | 1.406532397 | 1.45909278  | 1            | 0.866877331 |
| 1.384810591 | 1.323190558                                                                     | 1.399517506 | 1           | 1.106145805  | 1.096831908 |
| 1.20821683  | 2.088944079                                                                     | 1           | 1.081729277 | 0.753438391  | 1.061640747 |
| 1.939766388 | 1                                                                               | 1.125039439 | 1.322269892 | 1.598756925  | 1.125399396 |
| 1.06989926  | 1                                                                               | 1.272214961 | 1.819237846 | 1.129680741  | 0.661679467 |
| 0.704139201 | 1                                                                               | 1.414955648 | 1.406464586 | 1.123292395  | 1.031011897 |
| 0.962218005 | 1.357217158                                                                     |             |             |              |             |
| YOR009W     | YOR009W::TIR4                                                                   | 1           | 1.279770222 | 1.240651166  | 1.152130654 |
| 1.256193744 | 1                                                                               | 1.200919143 | 1.212103072 | 1.3244446616 | 1.154262891 |
| 1.189676243 | 1.106151922                                                                     | 1.572955481 | 0.927089892 | 1            | 1.553006968 |
| 1.741283418 | 2.245147434                                                                     | 1.331010046 | 1           | 1.168179978  | 1.541362319 |
| 1.553848039 | 1.229847306                                                                     | 1           | 1.22544032  | 1.301054242  | 1.342658418 |
| 0.994814118 | 1                                                                               | 1.191279084 | 1.722487816 | 1.438223324  | 2.256579036 |
| 1.543709188 | 1                                                                               | 0.766797383 | 0.978184624 | 0.742734363  | 1.069787412 |
| 0.731166546 | 2.445617817                                                                     |             |             |              |             |
| YOR023C     | YOR023C::AHC1::Ada Histone acetyltransferase complex component                  | 1           |             |              |             |
| 1.093803875 | 1.214480474                                                                     | 1.218826977 | 0.813992589 | 1            | 1.222323115 |
| 1.31630459  | 0.865718018                                                                     | 0.917232281 | 1           | 1.241754698  | 1.472970305 |
| 1.160951439 | 0.870727303                                                                     | 1           | 0.971396257 | 0.658289909  | 1.065086984 |
| 0.832139482 | 1                                                                               | 1.116206555 | 1.133337777 | 0.688540599  | 0.909856745 |
| 1.309065929 | 1.368423536                                                                     | 1.427655095 | 1.232703761 | 1.114095003  | 1           |
| 1.117364739 | 0.903623402                                                                     | 0.62296649  | 0.723895218 | 0.648353395  | 1           |
| 0.903645091 | 0.832651922                                                                     | 0.95022186  | 0.852341972 | 0.764925014  | 1.119923134 |

YEL038w YEL038w::UTR4::Product of gene unknown 1 1.345827515  
1.319158498 0.892850444 0.825370586 1 1.160133744 1.152718848  
1.034650808 0.999653533 1 1.077733832 1.263605288 1.816537448  
0.696452355 1 1.479965336 1.248401244 1.478919528 1  
1.273889774 1.168564357 1.288241338 0.799690138 1 1.237821934  
0.902686108 1.134414416 1.045888359 0.98908101 1 0.940035197  
0.844553136 0.83996842 0.642836017 0.716135793 1 1.008266816  
0.839641325 0.759641719 0.944371669 0.695045476 1.048997512  
YOR025W YOR025W::HST3::Homolog of SIR2 1 0.796361777 0.960454043  
0.801697675 0.728641489 1 0.909639807 0.880933458 0.837318963  
0.701800432 1 0.810809093 0.870599687 0.679213182 0.727892594 1  
0.737592387 0.65470594 0.886699798 0.61122799 1 0.959782919  
0.905687316 1.067856025 0.716118414 1 1.026486468 0.884567989  
0.99174959 1.101127413 1.093276431 1 0.872084745 0.818342137  
0.623825738 0.735211851 0.840223397 1 0.731983734 0.716701447  
0.760253742 1.000431295 0.760677873 1.626033762  
YEL040w YEL040w::UTR2::(alias: <u>C</u>ongo <u>R</u>ed  
<u>H</u>ypersensitivity) 1 0.951125095 0.694755954 0.89065443  
0.576684572 1 0.947205493 0.505613659 0.664081147 1  
0.663305316 0.480693578 0.331918994 0.427383997 1 0.570101909  
0.429757152 0.396559742 0.436275546 1 0.33186387 0.2046131  
0.215077659 0.368185969 1 0.959748995 0.66807977 1.219128121  
1.394917807 1.094231053 1 0.62734291 0.447836265 0.565517347  
0.561436713 0.257271233 1 0.786731908 0.387447583 0.791890779  
0.568395547 0.346650091 0.64270804  
YCR038c YCR038c::BUD5::GTP/GDP exchange factor for Rsr1 protein 1  
0.948161516 0.967674616 0.945710574 0.996484499 1 0.938283478  
1.114793309 1.047675178 0.913909002 1 1.039861787 1.04023331  
1.123966498 1.151516742 1 0.870976813 0.673609756 1.284261085  
1.303711227 1 1.367029328 2.075281436 1.121632657  
1.208595416 1.185476477 1.095193375 0.895868844 1.163556315 1  
0.92101334 0.951839513 1.067114944 0.88968417 1.331533153 1  
0.774260706 0.826588194 1.039423059 0.831546357 1.65396194 0.964937646  
YOR027W YOR027W::STI1::Heat shock protein also induced by canavanine and  
entry into stationary phase 1 0.689940117 1.071421455 1.058741025  
0.564640295 1 1.05532013 1.400949664 0.846702557 0.577492385 1  
0.956007275 1.41036321 1.391439331 0.59682089 1 1.819094343  
2.276204977 2.890024891 1.756304957 1 1.370251171 1.264385595  
2.066549362 2.178784697 1 1.161779079 1.227242159 1.197707507  
0.940589325 1.061492039 1 2.582304594 1.02572657 0.386097093  
0.506914349 0.285567223 1 1.247706531 0.675938749 0.537776717  
0.438217897 0.618667031 0.890509573  
YEL042w YEL042w::GDA1::converts nucleoside diphosphates to nucleoside  
monophosphates to recycle nucleosides and promote transport of additional  
nucleotide sugars into golgi 1 1.220667023 0.812241365 0.988584874  
0.706767788 1 1.189728757 1.127216542 0.69789554 1  
1.126904283 0.758086535 0.456466321 0.716171827 1 0.522688775  
0.420254414 0.737421577 1 0.526631049 0.448734074 0.260771417  
0.524503323 1 0.985357061 0.666928283 0.780119682 0.998432545  
0.854771446 1 0.833517518 0.40555681 0.598004148 0.673716584  
0.439045894 1 0.809835362 0.500362439 0.919026567 0.709670766  
0.525066564 0.723265402  
YCR040w YCR040w::MATALPHA1::transcription factor involved in the regulation  
of alpha-specific genes 1 1.266925843 1.304038213 0.907786426 1.286757261 1  
1.025002041 0.678342824 1.105908552 1.034166138 1 0.955259126  
0.987305372 1.249318123 0.790559051 1 0.829984679  
0.735333548 1 0.729135075 1.380456058 0.900347969 1

|         |                                                                                                            |             |             |             |             |             |
|---------|------------------------------------------------------------------------------------------------------------|-------------|-------------|-------------|-------------|-------------|
|         | 0.991790713                                                                                                | 0.900862399 | 0.784360405 | 0.902243173 | 0.840774644 | 1           |
|         | 0.848731105                                                                                                |             | 1.668136739 | 1           | 0.811665965 | 1.149031456 |
|         | 0.640686625                                                                                                |             | 1.304679768 |             |             |             |
| YOR029W | YOR029W::YOR029W::molecular_function                                                                       | unknown     |             | 1           |             | 1.956407466 |
|         | 2.423922858                                                                                                | 1           | 1.902693536 | 1.559379484 | 1.701615201 | 1           |
|         | 1.678808331                                                                                                | 2.129275586 | 2.116775605 | 1.706996331 | 0.593796819 |             |
|         | 0.565247907                                                                                                | 0.282892582 |             | 0.359841354 | 1           | 0.780772719 |
|         | 0.845431821                                                                                                | 0.826385758 | 1.11200831  | 0.852939631 | 1           | 1.353373303 |
|         |                                                                                                            | 1           | 1.13150853  | 0.700288507 | 1.079635595 | 0.754702902 |
|         | 1.472261485                                                                                                |             |             |             |             |             |
| YEL044w | YEL044w::IES6::Ino Eighty Subunit 6                                                                        |             | 1           | 1.217763118 | 1.211636255 |             |
|         | 1.143564757                                                                                                | 1.014671277 | 1           | 1.21708473  | 1.176844354 | 1.186333587 |
|         | 1.089259659                                                                                                | 1           | 1.115607219 | 1.07515787  | 1.05504232  | 1.074595541 |
|         |                                                                                                            |             | 1.00933277  | 0.701123284 |             | 1           |
|         | 1.21840023                                                                                                 | 1.027415038 | 1.321163951 | 1.116608367 | 1.023665385 | 1           |
|         | 0.839661553                                                                                                | 0.703657623 | 1.074490877 | 1.224200373 | 0.835258419 | 1           |
|         | 1.009864803                                                                                                | 0.728374181 | 1.045750475 | 0.839712721 | 0.608336022 | 1.17683864  |
| YCR042c | YCR042c::TAF2::TATA binding protein-associated factor (TAF)                                                |             |             | 1           |             | 1           |
|         | 0.977475894                                                                                                | 0.97985169  | 1.158041572 | 0.97719654  | 1           | 0.955480948 |
|         | 1.024329877                                                                                                | 0.787339306 | 0.9104578   | 1           | 0.856539374 | 0.958648312 |
|         | 0.760109342                                                                                                | 1.045116991 | 1           | 1.099609439 | 1.05391164  | 1           |
|         | 0.852336141                                                                                                |             | 1           | 0.898794367 | 0.958759325 | 0.892946125 |
|         | 0.947732725                                                                                                | 0.902967847 | 1           | 1.021490923 | 0.780349068 | 0.916271868 |
|         | 0.826023066                                                                                                | 0.863079495 | 1           | 0.950091766 | 0.796990422 | 0.937947694 |
|         | 0.916400501                                                                                                | 0.989070256 | 0.838847796 |             |             |             |
| YOR031W | YOR031W::CRS5::Metallothionein-like protein                                                                |             |             | 1           |             | 0.843001235 |
|         | 0.941692733                                                                                                | 0.824032118 | 0.961352882 | 1           | 0.761144745 | 0.847772857 |
|         | 1.062798312                                                                                                | 0.838065562 | 1           | 0.938297821 | 0.88239584  | 0.977016107 |
|         | 0.869727618                                                                                                | 1           | 2.583673012 | 2.225394242 | 2.032897338 | 1.884287736 |
|         | 0.874892034                                                                                                | 1.325402014 | 1.759883183 | 1.030846049 | 1           | 1.037502458 |
|         | 0.686499803                                                                                                | 0.675555309 | 0.967335884 | 0.986588599 | 1           | 0.984694949 |
|         | 0.727350801                                                                                                | 0.644362211 | 0.728288909 | 0.847084972 | 1           | 0.837726646 |
|         | 0.81569688                                                                                                 | 0.86641954  | 1.149970517 | 0.828186566 | 0.739902305 |             |
| YEL046c | YEL046c::GLY1::L-threonine aldolase that catalyzes cleavage of L-allo-threonine and L-threonine to glycine |             |             | 1           |             | 0.694960807 |
|         | 0.425082603                                                                                                | 1           | 0.974705424 | 0.92980543  | 0.544226907 | 0.658205656 |
|         | 1.881780963                                                                                                | 1.012890032 | 0.511979625 | 0.722272228 | 1           | 0.943845854 |
|         | 0.397294436                                                                                                | 0.560085758 | 1           | 0.784308035 | 0.38839961  | 0.263423056 |
|         | 0.434094327                                                                                                | 1           | 1.209147255 | 0.784457766 | 1.511886833 | 1.342345549 |
|         | 0.78735509                                                                                                 | 1           | 0.821246362 | 0.524988936 | 1.051021563 | 0.937224357 |
|         | 0.17055586                                                                                                 | 1           | 0.905641359 | 0.462745914 | 0.796883077 | 0.462333134 |
|         | 0.267898391                                                                                                | 0.598926829 |             |             |             |             |
| YCR044C | YCR044C::PER1::Protein Processing in the ER                                                                |             |             | 1           |             | 1.006698649 |
|         | 0.897776561                                                                                                | 0.8733013   | 0.860871639 | 1           | 0.878699221 | 0.86946989  |
|         | 0.871164251                                                                                                | 0.870034284 | 1           |             | 0.949891416 | 0.925976714 |
|         | 1.566614638                                                                                                | 0.90901179  | 1.222227075 | 0.818506411 | 1           | 1.124464441 |
|         | 1.014410625                                                                                                | 0.736948714 | 0.491395475 | 1           | 1.00738314  | 1.307490975 |
|         | 1.280775727                                                                                                | 1.185812982 | 0.942861216 | 1           | 1.006534873 | 1.138531505 |
|         | 0.914358249                                                                                                | 0.86672498  | 0.561041632 | 1           | 0.97775062  | 0.862105969 |
|         | 0.792501662                                                                                                | 0.789823946 | 0.790015852 | 1.074390646 |             |             |
| YOR033C | YOR033C::EXO1::Protein that complements a drug-hypersensitive mutation                                     |             |             | 1           |             | 0.844980031 |
|         | 0.998422686                                                                                                | 1.120248233 |             | 1.040549464 | 1           | 0.81366075  |
|         | 0.885010938                                                                                                | 1.27315276  | 1           | 0.726715885 | 0.846874968 | 0.646490349 |
|         | 0.973959171                                                                                                | 1           | 1.012370245 | 1.119324816 |             | 0.992990789 |
|         | 1.083992745                                                                                                | 1.142045396 | 1.454714645 | 1.150517923 | 1.221049711 | 1           |

0.871185647 0.982353142 0.650631099 0.818440414 0.788451162 1  
 0.723685417 0.870560158 0.695159614 0.974508701 0.600698706 1.346709701  
 YEL060c "YEL060c::PRB1::dispensable for haploidization and sporulation, but  
 needed for full protein degradation during sporulation, and proper spore  
 morphology" 1 0.985670078 1.116600923 1.199562534 0.763091255 1  
 1.197012437 1.63275946 0.95383167 0.918018399 1 1.627340547  
 2.145857589 2.082594843 1.281378823 2.297007028 2.488570539  
 1.227032041 1 1.004171537 1.23275872  
 0.796218284 0.757738352 1 1.180237545 1.034079262 2.199931288  
 2.055792237 1 1.114274689 0.47003865 1.454002155  
 0.652339884  
 YCR058C YCR058C 1 0.873833842 1.454654885 0.617182281 1  
 1.080253162 1.081732213 0.969822831 0.853950356 1 0.524970463  
 0.504830441 1.393047259 1 0.138446998 0.313132877 1  
 0.196670692 1 0.56711135 0.435640681  
 1.139637899 0.79853949 1 0.579904595 0.358856472 0.294603638  
 0.884786676 0.236756586 1 0.342770601 0.784710876 0.420606254  
 0.334551365 0.471085701  
 YEL062w YEL062w::NPR2::Putative post-transcriptional regulator of nitrogen  
 permeases 1 2.047275417 1.51567471 1.720818264 1.224018879 1  
 2.013091725 2.07130833 1.646706458 1.340138226 1 1.715338716  
 1.57626767 1.412883306  
 1 1.16819402 1.323388323 1.308260782 1.136091234  
 1.102259628 1 0.995003423 0.8356747 1.294539898 0.914065228  
 0.76183476 1 1.172240686 1.006768148 1.226378716 0.860182256  
 1.24344775  
 YCR060W YCR060W::YCR060W::molecular\_function unknown 0.835596453 1.000292503  
 1 0.38083748 0.766586703 1.541210184 1 1.509913938  
 1.130961321 1.326809686 1.11119437 1 0.856835009 1.039985856  
 0.800719274 0.846138124 0.796712325 1 0.988621909 1.880602958  
 1.507546551 1.526035367 2.545910719 1 1.039818846 1.187833674  
 1.248918258 1.444544154 1.147730357 1.429018341  
 YEL064c YEL064c::YEL064C::molecular\_function unknown 1 1.266196932  
 0.943391066 1.042049816 1.274719013 1 1.026017567 1.041933335  
 1.185919902 1.092765147 1 1.483759562 1.169535522 0.972206749  
 1.2992146 1 0.874248014 0.553330879 1.007765708 1  
 1.428902043 2.132047208 0.987516921 1.072663197 1 1.271950601  
 1.226331387 1.38988912 1.176031367 1 0.947632297 1.301307637  
 1.280412336 0.834822913 0.870598042 1 1.50869726 1.59015201  
 1.093196242 0.968664575 1.072639421  
 YEL066w YEL066w::HPA3::Histone and other Protein Acetyltransferase; Has  
 sequence homology to known HATs and NATs 1 1.11163759 1.296952729  
 1.024336445 1.493282621 1 0.926971656 1.072664512 1.71810902  
 1.922864557 1 1.106261128 1.343461275 1.54803972 1.835590866 1  
 1.1937672 0.844086266 0.805850165 1.800699573 1 1.577414994  
 2.456173945 1.706135511 1.778762161 1 1.295074842 1.5613109  
 1.572602349 1.177039767 0.993304678 1 1.146504299 1.944852434  
 1.966517372 2.157037508 1.997555009 1 1.078144797 1.442090222  
 1.567717646 1.339747089 1.002925965 1.081395653  
 YCR062W YCR062W 1 1.501392472 1.643101257 1.406262213 1.335908294 1  
 1.368111296 1.460292965 1.647359383 1.619593058 1 1.899212221  
 2.365098371 4.653346135 1.371873037 0.592753861  
 1 1.017982995 1.193262296 1.294790617  
 1.04499147 1 0.868999651 1.017134047 0.888190837 1  
 0.938637548 0.965353079 1.042555828 1.011471609 1.097015602 0.922907714

|           |                                                                 |               |               |                                     |
|-----------|-----------------------------------------------------------------|---------------|---------------|-------------------------------------|
| YEL068c   | YEL068c::YEL068C::molecular_function                            | unknown       | 1             | 1.029860406                         |
|           | 1.352404516                                                     | 1.009372339   | 1.715831863   | 1 0.923258185 1.011394755           |
|           | 1.491612421                                                     | 1.497548372   | 1 0.890301149 | 1.165233452 1.651893994             |
|           | 1.351448089                                                     | 0.673838363   | 0.388762178   | 0.578837415 1.036975457 1           |
|           | 1.400426281                                                     | 1.327970923   | 2.103678601   | 1.264804353 1 1.14831691            |
|           | 1.169634649                                                     | 0.822666405   | 1.040512564   | 1.180121523 1 0.924828688           |
|           | 1.720404314                                                     | 0.904831301   | 1.203633177   | 2.421703698 0.854479523             |
|           | 0.962970542                                                     | 0.921738847   | 1.325681422   | 0.959966046 1.073514981             |
| YCR064C   | YCR064C::YCR064C::molecular_function                            | unknown       | 1             | 1.268022195                         |
|           | 1.268503614                                                     | 1.370305787   | 1.143254797   | 1 1.318228544 1.211062902           |
|           | 1.301354131                                                     | 1.226257915   | 1 1.167498926 | 1.076006135 0.897075663             |
|           | 1.237835021                                                     | 1 1.064858221 |               | 0.356235095                         |
|           | 0.157634425                                                     | 1 1.011148152 | 0.854481013   | 0.941099036 1.164736146             |
|           | 1.01199526                                                      | 1 0.756796126 | 0.468955051   | 0.709390528 0.788714023 1           |
|           | 0.802574904                                                     | 0.91689739    | 0.844750209   | 1.051291169 0.673553238 0.855484646 |
| YCR066w   | "YCR066w::RAD18::Zn finger protein, putative ATPase"            |               | 1             |                                     |
|           | 1.411075438                                                     | 1.42971234    | 1.59407749    | 1 1.342193617 1.516526064           |
|           | 1.346806603                                                     | 1 1.208097156 | 1.305053066   | 1.170955367 1.37423279              |
|           |                                                                 |               |               | 0.86393461                          |
|           | 1.044655126                                                     | 0.917376      | 0.921077238   | 0.977923141 1 1.046778871           |
|           | 1.018322076                                                     | 0.773952386   | 1.043910127   | 0.998341457 1 1.116754584           |
|           | 1.123043725                                                     | 1.117489444   | 1.122092036   | 1.09903447 1.087524994              |
| YCR068W   | YCR068W::CVT17::Cytoplasm to vacuole targeting mutant           |               | 1             |                                     |
|           | 1.022213381                                                     | 1.060958327   | 1.280859092   | 0.683219007 1 1.265441896           |
|           | 1.461665386                                                     | 1.015269646   | 0.760891757   | 1 1.83035773 2.12123832             |
|           | 0.726640562                                                     | 1.485195209   | 1 2.212687171 | 1.956012412 1.540890641 1           |
|           | 0.879580383                                                     | 0.915851841   | 0.799376464   | 0.67882522 1 1.123111673            |
|           | 1.226576514                                                     | 1.434176867   | 1.43280356    | 0.963749716 1 1.208886375           |
|           | 0.701023316                                                     | 1.211778715   | 1.883543339   | 0.425667733 1 0.872563679           |
|           | 0.709379914                                                     | 1.123356027   | 0.353948081   | 0.906975654 0.741653531             |
| YPL007C   | YPL007C::TFC8::Transcription factor for RNA polymerase III      |               | 1             |                                     |
|           | 0.89148276                                                      | 0.789791289   | 1.134756608   | 0.861110144 1 0.935693961           |
|           | 0.880143065                                                     | 0.786857008   | 0.789990005   | 1 0.930529612 1.017499643           |
|           | 1.135892213                                                     | 1 1.230329326 | 0.393714077   | 0.814424317 0.874391997 1           |
|           | 1.80739704                                                      | 1.445517481   | 1.342419166   | 1.454357364 1 1.25896032            |
|           | 1.301831353                                                     | 1.508735092   | 1.198893042   | 1.314982844 1 1.094796313           |
|           | 1.085635535                                                     | 1.103802115   | 0.876202188   | 0.855488015 1 1.349430139           |
|           | 1.613797294                                                     | 1.323811634   | 1.588326511   | 1.535821883 1.032360714             |
| YPL009C   | YPL009C::YPL009C::molecular_function                            | unknown       |               | 0.948090967                         |
|           | 0.840447656                                                     | 1.415572872   | 0.835060543   | 1.0388046 1.28730376                |
|           | 0.836342565                                                     | 1.217688309   | 1.1106028     | 0.670756885 1.252126974             |
|           | 0.967944604                                                     | 1.080168306   | 0.790796909   | 0.570441841                         |
|           | 1 0.978590992                                                   | 1.058719543   | 1.022429708   | 0.943255106 0.862466435 1           |
|           | 0.994828416                                                     | 0.894321117   | 0.933427374   | 0.846379535 0.614688631 1           |
|           | 0.925895361                                                     | 1.094931266   | 1.08724813    | 0.79379666 0.870412312              |
| YPL011C   | YPL011C::TAF3::TAF(II) complex (TBP-associated protein complex) |               |               |                                     |
| component | 1 0.594117671                                                   | 0.710181015   | 0.689847981   | 0.746670035 1                       |
|           | 0.61723493                                                      | 0.638910464   | 0.8081308     | 1 0.665188068 0.651861942           |
|           | 0.570853249                                                     | 0.821614446   | 1 0.675271916 | 0.750985872 1.192132586 1           |
|           | 1.513744774                                                     | 1.487682726   | 1.791271294   | 1.247116064 1 1.204064266           |
|           | 1.181502926                                                     | 0.772603154   | 0.890446259   | 1.14479798 1 0.876400913            |
|           | 0.927656599                                                     | 0.801038659   | 0.932107062   | 1.245605893 1 0.836453664           |
|           | 0.948647113                                                     | 0.862109791   | 0.994969588   | 0.953186395 1.082271213             |
| YPL025C   | YPL025C::YPL025C::molecular_function                            | unknown       |               | 1.055212951                         |
|           | 0.852974697                                                     | 1.089074178   | 0.650035391   | 0.940735668 1.040167783             |
|           | 0.805587814                                                     | 0.822713233   | 0.863232537   | 0.907521165 0.980426858             |
|           | 0.929060562                                                     | 1 2.925441598 |               | 0.477308466                         |

|         |                                                                                                                                          |             |             |             |             |             |             |
|---------|------------------------------------------------------------------------------------------------------------------------------------------|-------------|-------------|-------------|-------------|-------------|-------------|
|         | 1                                                                                                                                        | 0.961043387 | 0.771150086 | 0.812161253 | 0.829836111 | 1.028298457 | 1           |
|         | 0.778703347                                                                                                                              | 0.927274745 | 0.663710639 | 0.749088722 | 1.017403397 | 1           |             |
|         | 0.826576083                                                                                                                              | 0.857302314 | 1.330905453 | 0.663405151 | 1.051127378 |             |             |
| YPL027W | YPL027W::SMA1::Spore Membrane Assembly                                                                                                   |             |             |             |             |             |             |
|         |                                                                                                                                          |             |             |             | 1.326322399 |             |             |
|         | 0.237332576                                                                                                                              | 0.311255769 | 0.451098084 | 1           | 0.800130513 |             |             |
|         | 0.730581667                                                                                                                              |             | 0.8265201   | 0.685001001 | 0.867751707 | 0.934863942 | 1           |
|         | 0.764898665                                                                                                                              | 0.755021514 | 0.756603274 | 0.767349674 | 0.998856108 | 1           |             |
|         | 0.920837972                                                                                                                              | 1.027220921 | 1.100739065 | 0.784910234 | 1.58952569  |             |             |
| YPL029W | YPL029W::SUV3::putative ATP-dependent helicase 1 0.621354052                                                                             |             |             |             |             |             |             |
|         | 0.699551568                                                                                                                              | 0.94990331  | 0.677418238 | 1           | 0.813173777 | 0.868512997 |             |
|         | 0.8244896                                                                                                                                | 0.875363222 | 1           | 0.758102096 | 0.6044206   | 0.456489247 |             |
|         | 0.861540061                                                                                                                              | 1           | 0.827095697 | 0.234685348 | 0.857446714 | 1           |             |
|         | 1.220502418                                                                                                                              | 1.364736461 |             | 0.994011362 | 1           | 0.944510114 | 0.982099377 |
|         | 1.089621813                                                                                                                              | 1.018399297 | 1.054883043 | 1           | 0.976124711 | 0.775497144 |             |
|         | 0.827473067                                                                                                                              | 0.895685916 | 0.770884916 | 1           | 1.03826349  | 1.021386173 |             |
|         | 1.140011382                                                                                                                              |             | 1.213426346 | 0.818708442 |             |             |             |
| YPL031C | YPL031C::PHO85::involved in phosphate and glycogen metabolism and cell cycle progression 0.981335728 1.059100748 0.948187797 0.803733529 |             |             |             |             |             |             |
|         | 0.954053649                                                                                                                              | 1.107169074 | 1.132857925 | 1.025913539 | 0.931953538 |             |             |
|         | 1.131757245                                                                                                                              | 1.321648195 | 1.054371174 | 1           | 1.25738742  | 1.22705473  |             |
|         | 0.997442217                                                                                                                              | 1.247757467 | 1           | 1.6194956   | 1.577971081 | 1.40803455  | 1           |
|         | 1.150458219                                                                                                                              | 1.203764352 | 1.48490015  | 1.157465472 | 1.032145665 | 1           |             |
|         | 1.047786935                                                                                                                              | 1.080767844 | 1.461093882 | 0.983671458 | 0.850149365 | 1           |             |
|         | 0.945343642                                                                                                                              | 1.00847074  | 1.035571184 | 0.739775618 | 1.235971028 | 1.238132366 |             |
| YPL033C | YPL033C::YPL033C::molecular_function unknown                                                                                             |             |             |             |             |             |             |
|         | 1.110347577                                                                                                                              |             | 1.484117036 |             | 1.187182117 |             |             |
|         | 1.035637921                                                                                                                              |             | 1.628981066 |             | 0.540745968 |             |             |
|         | 0.38370844                                                                                                                               | 1           | 1.225702836 |             | 2.369620539 | 1.041712835 |             |
|         | 0.792035141                                                                                                                              |             | 0.688032    | 0.861934394 | 0.914769604 | 1           |             |
|         | 0.833355542                                                                                                                              | 0.675272886 | 0.856595834 | 1           | 1.053285768 |             |             |
|         | 1.591786878                                                                                                                              | 1.20135611  |             |             |             |             |             |
| YPL035C | YPL035C::YPL035C::molecular_function unknown 1 0.715615775                                                                               |             |             |             |             |             |             |
|         | 1.134253428                                                                                                                              |             | 1.545178858 | 1           | 0.932466745 | 1.37334903  | 1.171639562 |
|         | 1.409302182                                                                                                                              | 1           | 1.09119145  | 1.279159313 | 1.232212294 | 1           |             |
|         | 0.59685346                                                                                                                               |             | 0.624832273 |             | 0.41211512  |             |             |
|         | 0.591400928                                                                                                                              | 1           | 0.767593876 | 1.040291995 | 0.80116077  | 0.77751239  |             |
|         | 1.283345476                                                                                                                              | 1           | 1.090760559 | 1.252624378 | 1.270865168 | 1.392981662 |             |
|         | 1.391735077                                                                                                                              | 1           | 1.027369093 | 0.710575819 | 1.413491145 | 0.01891106  |             |
|         | 1.646745784                                                                                                                              | 1.069136866 |             |             |             |             |             |
| YOL022C | YOL022C::YOL022C::molecular_function unknown 1 0.609550964                                                                               |             |             |             |             |             |             |
|         | 0.57928454                                                                                                                               | 0.626374515 | 0.655655937 | 1           | 0.522292002 | 0.746948602 |             |
|         | 0.821022252                                                                                                                              | 1           | 0.566151135 | 0.425288568 | 0.698214439 | 0.523491939 | 1           |
|         | 0.66439918                                                                                                                               |             | 0.719361393 | 0.664761891 | 1.350433681 | 0.845373544 |             |
|         | 0.573059354                                                                                                                              | 1.018644533 | 1           | 0.916144153 | 0.82049023  | 0.880937933 |             |
|         | 0.878928606                                                                                                                              | 0.900532723 | 1           | 0.93682882  | 0.732855357 | 0.840591159 |             |
|         | 0.928826106                                                                                                                              | 0.970461904 | 1           | 0.985619728 | 0.703524765 | 0.800599446 |             |
|         | 0.751503797                                                                                                                              | 0.520617906 | 0.890509573 |             |             |             |             |
| YPL049C | "YPL049C::DIG1::Down-regulator of Invasive Growth, Regulator of Sterile Twelve, binds Fus3 and Ste12" 1 0.86971851 0.891456126           |             |             |             |             |             |             |
|         | 0.715012755                                                                                                                              | 0.465553129 | 1           | 1.059212931 | 0.653473327 | 0.561903313 | 1           |
|         | 0.972114487                                                                                                                              | 0.946918959 | 0.889834064 | 0.679275309 | 1           | 0.796280318 |             |
|         | 0.764736678                                                                                                                              | 0.79630432  | 0.604453209 | 1           | 1.122655266 | 0.772241594 |             |
|         | 1.081064585                                                                                                                              | 1.293754325 | 1           | 1.042633445 | 1.095722589 | 1.001633387 |             |
|         | 1.109167455                                                                                                                              | 1.104328264 | 1           | 0.752490332 | 0.710160249 | 0.712335581 |             |
|         | 0.799461746                                                                                                                              | 0.957453683 | 1           | 0.793263973 | 0.606599497 | 0.903188296 |             |
|         | 0.424561539                                                                                                                              | 0.983792992 | 0.707504217 |             |             |             |             |



YOL024W YOL024W::YOL024W::molecular\_function unknown 0.865594772  
1.253838563 0.961318068  
0.945215463 3.905347581 0.967241108 1 0.670058716 0.249770821  
0.632062698 0.990131341 1 0.985165814 1.691409608 1.111206118  
0.884169882 1 0.793303627 0.965040453 0.848142643 0.832944685 1  
2.769537506 1 1.681223094  
1.848078902  
YOL026C YOL026C::YOL026C::molecular\_function unknown 1 0.983077958  
1.481790155 0.829837469 1.442546452 1 1.033329788 1.595549032  
1.446065215 1 1.13433192 1.268644754 1.90796515 1.373435522 1  
1.003719221 0.653702855 0.801113104 1.324520345 1 1.80910454  
2.51993816 2.21704035 1.452564691 1 1.05766211 1.135134368  
1.062046625 1.239898219 1.004888062 1 0.893629773 1.472363451  
1.310425345 1.291797365 1.413892125 1 0.952734835 1.251287514  
1.14538737 1.14872325 0.959802382 1.088400659  
YOL028C YOL028C::YAP7::basic leucine zipper (bZIP) transcription factor  
1.094614141 1.097820537 1.081247191 0.968200363  
1.2675236 1.316550153 1.110173471 1 0.581351996  
0.622905551 0.929855603 0.641185964 1 0.896210186 1.0924341  
0.681756551 0.33773694 1 0.854958749 0.867824908 0.972780544  
0.903925144 1.081980992 1 1.073885219 1.451583486 1.483726111  
1.588834759 1.477352955 1 0.851438175 1.193465295 0.946065616  
0.974267249 0.761784203 0.931663945  
YOL030W YOL030W::GAS5::Hypothetical ORF 1 1.030671753 0.858618052  
0.861998122 0.767158064 1 0.961095098 1.026547224 0.779852967  
0.831191015 1 1.191199794 0.934719189 0.825547719 0.818650742 1  
1.300053096 1.179026611 1.467692634 0.681912844 1 0.628362211  
0.328717399 0.461512472 0.495792047 1 1.13768156 0.871564412  
1.065731718 1.425569198 0.784362302 1 0.707989445 0.587599015  
0.671671839 0.63563227 0.474135798 1 0.78824318 0.629054588  
0.800926004 0.529259935 1.052336468 0.645334878  
YOL032W YOL032W::YOL032W::molecular\_function unknown 1 0.861130145  
1.351705959 1.033732578 1.401934224 1 0.890298964 1.022776635  
1.464999988 1.257724786 1 1.186887164 2.021955453 3.044894886  
1.120266126 1 2.040908747 1.31737117 2.11259834 2.432102469 1  
2.597409448 4.079174076 4.877677569 2.321651568 1 1.682147951  
1.681681343 1.202506951 0.830957315 1.293214691 1 1.985138098  
1.457950638 1.813018064 1.276387865 1.751840692 1 1.968946566  
1.162797928 0.917751239 0.868494831 1.549514 1.399247195  
YCR083W YCR083W::TRX3::mitochondrial thioredoxin 1 1.702429958  
1.16621519 2.062499665 1 1.29187352 1.267024743 2.037885229  
2.054565215 1 1.079756337 1.391271236 2.727796566 1.604547662 1  
1.237204094 1.762372113 1.521065734 2.727229046 1 1.313435264  
3.188693968 3.344222686 1.925128657 1 0.931144411 1.095879267  
0.866123218 0.809218774 0.7866798 1 1.154164266 1.562514376  
1.25412741 1.426167657 2.380971813 1 1.093717034 1.507692816  
1.111088128 1.745692099 1.226514942  
YOL046C YOL046C::YOL046C::molecular\_function unknown 1 1.087652417  
0.886403574 1.268783698 0.664142066 1 1.266278198 0.989837334  
0.626672903 1 1.347364706 1.258943034 1.192910525 1  
0.646870587 0.758040417 0.756242103 1 0.724183603 1.405302213  
0.672177676 0.51633694 1 1.038118009 0.911481632 0.860666219  
1.271428788 0.763930738 1 0.525618248 0.659886228 0.876550276  
0.513581323 1 0.849266813 0.690223115 0.807153037 0.495055314  
0.855725537 1.023604482  
YCR085W YCR085W::YCR085W::molecular\_function unknown 1 1.147128366  
1.407091862 1.157643666 1.502946409 1 1.117657664 0.999908573

|             |                                                                                                                                                                  |             |             |             |             |             |             |
|-------------|------------------------------------------------------------------------------------------------------------------------------------------------------------------|-------------|-------------|-------------|-------------|-------------|-------------|
| 1.437644655 | 1.485154825                                                                                                                                                      | 1           | 0.933168683 | 1.147655958 | 1.41729409  |             |             |
| 1.120628657 | 1                                                                                                                                                                | 1.023756765 | 1.708610105 | 0.992539343 | 1           |             |             |
| 0.685785866 | 1.32442684                                                                                                                                                       | 0.745875909 | 1           | 0.674523498 | 0.656969929 |             |             |
| 0.464694718 | 0.63842481                                                                                                                                                       | 0.799011371 |             | 1.01013156  |             |             |             |
|             | 0.493143767                                                                                                                                                      | 0.737564119 | 0.784618415 | 1.857581387 | 1.218868573 |             |             |
| YOL048C     | YOL048C::YOL048C::molecular_function unknown                                                                                                                     |             |             |             | 0.627956358 |             |             |
| 1.11148638  | 0.873272046                                                                                                                                                      | 0.994632536 | 0.68527203  | 0.72163698  |             |             |             |
| 1.111658202 | 0.888381651                                                                                                                                                      | 0.899401462 | 1.119064553 | 0.964066936 |             |             |             |
| 1.192408655 | 1                                                                                                                                                                | 1.549484279 | 1.917698278 | 1.410003985 | 1           |             |             |
| 1.971536713 | 4.628527212                                                                                                                                                      | 3.42706574  | 1.138760609 | 1           | 1.406666693 |             |             |
| 1.766273388 | 1.370291116                                                                                                                                                      | 0.696716083 | 1.139552691 | 1           | 1.268681478 |             |             |
| 2.414974587 | 2.6814994                                                                                                                                                        | 1.528016601 | 2.280217382 | 1           | 1.629922942 |             |             |
| 2.257237388 | 1.368388587                                                                                                                                                      | 1.540149427 | 2.039008057 | 1.58487939  |             |             |             |
| YCR087W     | YCR087W::YCR087W::molecular_function unknown                                                                                                                     |             |             |             | 0.985029615 |             |             |
| 1.090987649 | 0.695486789                                                                                                                                                      | 1.09546627  | 0.760337209 | 0.685390382 |             |             |             |
| 1.191157005 | 0.965201235                                                                                                                                                      | 0.845148002 | 0.709728111 | 0.938358467 |             | 1           |             |
| 0.865064111 | 0.389141888                                                                                                                                                      | 0.280980825 | 0.546562338 | 1           | 1.574511665 |             |             |
| 1.518169914 | 0.611850278                                                                                                                                                      | 0.697558798 | 1           | 0.978469033 | 0.945474248 |             |             |
| 0.612763973 | 0.848188501                                                                                                                                                      | 0.929765853 | 1           | 0.951165573 | 1.042548142 |             |             |
| 0.600579512 | 0.902339469                                                                                                                                                      | 1.64355441  | 1           | 0.953194261 | 1.145174883 |             |             |
| 0.794571198 | 1.794759215                                                                                                                                                      | 0.648701927 | 0.958808305 |             |             |             |             |
| YOL050C     | YOL050C::YOL050C::molecular_function unknown                                                                                                                     |             |             |             | 1           | 1.252418043 |             |
| 1.308383585 | 1.628961097                                                                                                                                                      | 1           | 0.947815352 | 0.896632186 | 1.289060369 |             |             |
| 1.479703352 | 1                                                                                                                                                                | 1.025841133 | 1.035895403 | 1.389247672 | 1.333005813 | 1           |             |
| 0.98031673  | 0.915312729                                                                                                                                                      | 1.081379603 | 1           | 0.904138985 | 2.136489127 |             |             |
| 1.243732411 | 0.913922932                                                                                                                                                      | 1           | 1.065202064 | 1.026147721 | 0.879077136 |             |             |
| 0.8711597   | 0.811511777                                                                                                                                                      | 1           | 1.048662557 | 1.315183191 | 1.103876885 |             |             |
| 0.942571313 | 1.290004106                                                                                                                                                      | 1           | 1.17135276  | 1.646002535 | 1.307155108 |             |             |
| 1.07754017  | 1.552530883                                                                                                                                                      | 1.077893097 |             |             |             |             |             |
| YCR089W     | "YCR089W::FIG2::Factor-Induced Gene 2: expression is induced by the mating pheromones, a and alpha factor; required for efficient mating"                        |             |             |             | 1           |             |             |
| 1.44637703  | 1.272312976                                                                                                                                                      | 1.262666275 | 1.337066966 | 1           | 1.367214491 |             |             |
| 1.17722943  | 1.354578233                                                                                                                                                      | 1.119335964 | 1           | 1.377571768 | 1.365463083 |             |             |
| 1.303986374 | 1.089823475                                                                                                                                                      | 0.711997727 | 0.551156497 | 0.554091575 |             | 1           |             |
| 0.839701568 | 1.30237307                                                                                                                                                       | 0.897814429 | 0.452490884 | 1           | 0.963360292 |             |             |
| 0.984994308 | 0.950024761                                                                                                                                                      | 0.844068401 | 1.027476619 | 1           | 1.058045424 |             |             |
| 1.382611695 | 1.065069016                                                                                                                                                      | 1.140021976 | 1.457439296 | 1           | 0.827683759 |             |             |
| 1.176368111 | 1.001545327                                                                                                                                                      | 1.317089858 | 0.915447783 | 0.791564082 |             |             |             |
| YOL052C     | YOL052C::SPE2::S-adenosylmethionine decarboxylase                                                                                                                |             |             |             | 1           |             |             |
| 0.941282827 | 0.77076259                                                                                                                                                       | 0.916603158 | 0.889876541 | 1           | 0.891144182 |             |             |
| 0.791971704 | 0.801536979                                                                                                                                                      | 1.013737861 | 1           | 0.717912646 | 0.54713721  |             |             |
| 0.757673118 | 0.660269376                                                                                                                                                      | 1           | 0.538664263 | 1.193010205 | 0.365262538 | 1           |             |
| 0.982506399 | 0.874284166                                                                                                                                                      | 0.576838066 | 1.239482416 | 1           | 1.22066191  |             |             |
| 0.905034135 | 0.838507468                                                                                                                                                      | 0.923937773 | 0.788029296 | 1           | 0.718376162 |             |             |
| 0.727023501 | 0.691750782                                                                                                                                                      | 0.617104694 | 0.873211126 | 1           | 0.887127309 |             |             |
| 1.050982778 | 0.974997653                                                                                                                                                      | 0.841969604 | 0.842350299 |             |             |             |             |
| YCR091w     | YCR091w::KIN82::Putative serine/threonine protein kinase most similar to cyclic nucleotide-dependent protein kinase subfamily and the protein kinase C subfamily |             |             |             | 1           |             |             |
| 1.649050319 | 1.758203667                                                                                                                                                      | 1.329171356 | 1.100244553 | 1           | 1.388548414 |             |             |
| 2.231586623 | 1.486296319                                                                                                                                                      | 1.588331867 | 0.978182515 | 1.151219476 |             |             |             |
| 0.499427632 |                                                                                                                                                                  | 1           | 0.920096619 | 0.983411107 |             |             |             |
| 1.038092844 | 0.853177422                                                                                                                                                      | 1.001794053 | 1           | 1.239999697 | 1.015696623 |             |             |
| 1.236152766 | 1.338125248                                                                                                                                                      | 1.149980602 | 1           | 1.380048071 | 1.074614732 |             |             |
| 1.295806807 | 0.956899649                                                                                                                                                      | 1.506750743 | 1.449157695 |             |             |             |             |
| YCR093w     | YCR093w::CDC39::Required for Start B in mitosis and spindle pole body separation at meiosis I                                                                    |             |             |             | 1.046593979 | 1.081877086 | 1.105846419 |

|             |                                                                                                                                                                                                                                   |             |             |                                       |
|-------------|-----------------------------------------------------------------------------------------------------------------------------------------------------------------------------------------------------------------------------------|-------------|-------------|---------------------------------------|
| 0.969179319 | 1.013379351                                                                                                                                                                                                                       | 1.064332138 |             | 1.009113999                           |
| 1.086766388 | 1.086677804                                                                                                                                                                                                                       |             | 0.565247907 |                                       |
|             | 1                                                                                                                                                                                                                                 | 1.081022369 | 1.167965048 | 0.947342631 1.048105673               |
| 0.999847574 | 1                                                                                                                                                                                                                                 | 0.91230475  | 1.397871749 | 0.716076991 0.852636833               |
| 1.273286944 | 1                                                                                                                                                                                                                                 | 1.120449837 | 1.250658465 | 1.221558539 1.487110142               |
| 1.299751106 | 0.95530575                                                                                                                                                                                                                        |             |             |                                       |
| YCR106W     | YCR106W::RDS1::Regulator of drug sensitivity                                                                                                                                                                                      |             | 1           | 1.580384748                           |
| 1.515648366 | 1.895345726                                                                                                                                                                                                                       | 1.181166153 | 1           | 1.792383893 1.759402161               |
| 1.531950784 | 1.17577136                                                                                                                                                                                                                        | 1           | 1.700952233 | 2.126442842 1.85946887 1              |
| 1.405683603 |                                                                                                                                                                                                                                   | 0.835538356 |             | 0.613516021 1                         |
| 0.946429281 | 1.027721865                                                                                                                                                                                                                       | 0.997067041 | 0.985713066 | 0.962704402 1                         |
| 1.49179952  | 1.006760883                                                                                                                                                                                                                       | 0.895043217 | 1.199560628 | 0.565058524 1                         |
| 0.843460531 | 1.003102652                                                                                                                                                                                                                       | 1.082363611 | 0.698929576 | 0.957366984 0.880002116               |
| YCRX01W     | YCRX01W                                                                                                                                                                                                                           | 1.018274376 | 0.859807585 | 1.456944208 0.81352321                |
| 1.207095791 | 1.32464866                                                                                                                                                                                                                        | 0.825462574 |             | 1.244212158 1.275606671               |
| 0.704645281 | 1.158143956                                                                                                                                                                                                                       | 1           | 1.422729112 | 1.301687878                           |
| 0.784648587 |                                                                                                                                                                                                                                   | 1           | 0.95687415  | 1.023854729 1.141644031               |
| 1.297047061 | 1.068382133                                                                                                                                                                                                                       | 1           | 1.199001234 | 0.735274626 0.941061955               |
| 1.161492844 | 0.859801289                                                                                                                                                                                                                       | 1           | 1.09663569  | 0.965436637 1.245914436               |
| 0.878459311 | 1.234058543                                                                                                                                                                                                                       | 1.205734225 |             |                                       |
| YCRX03C     | YCRX03C                                                                                                                                                                                                                           | 1           | 1.144069202 | 1.050328584 1.519467076 0.775149504 1 |
| 1.313846721 | 1.316944956                                                                                                                                                                                                                       |             | 0.864356784 | 1 1.410048473 1.437349109             |
| 0.45174408  | 1.351496427                                                                                                                                                                                                                       |             |             | 0.44009567 1                          |
| 0.381581372 |                                                                                                                                                                                                                                   | 0.539493473 | 1           | 0.729285498 0.782666373               |
| 0.938065517 | 0.859682748                                                                                                                                                                                                                       | 1           | 1.129941014 |                                       |
| 1.483575829 | 1                                                                                                                                                                                                                                 | 1.103150452 | 1.215148182 | 0.512447741 1.739466385               |
| 0.906270811 |                                                                                                                                                                                                                                   |             |             |                                       |
| YCRX05W     | YCRX05W                                                                                                                                                                                                                           | 1           | 1.11699167  | 1.019775759 1.275030944 0.865176738 1 |
| 1.194003077 | 1.164637164                                                                                                                                                                                                                       | 0.980976918 | 0.964475028 | 1 1.233667016                         |
| 1.154535372 | 0.851493867                                                                                                                                                                                                                       | 1.188926079 |             | 0.573321053 0.843510282               |
| 1           | 0.660024665                                                                                                                                                                                                                       | 2.183689625 |             | 1 0.856314472 0.926369138             |
| 0.866228793 | 1.17972149                                                                                                                                                                                                                        | 1.060024573 | 1           | 0.875455731 0.486076175               |
| 0.679030252 | 0.88251608                                                                                                                                                                                                                        | 0.727635628 | 1           | 0.758848842 0.767614679               |
| 1.005490717 | 0.681694408                                                                                                                                                                                                                       | 0.99940287  | 0.719762951 |                                       |
| YPL051W     | YPL051W::ARL3::Similar to ADP-ribosylation factor. Part of the carboxypeptidase Y pathway.                                                                                                                                        | 1           | 1.062667507 | 1.355013269 1.543325593 1             |
| 0.962315503 | 0.901945611                                                                                                                                                                                                                       | 1.310063028 | 1.162784688 | 1 0.893322476                         |
| 0.924262194 | 1.190380064                                                                                                                                                                                                                       | 1.092185858 | 1           | 1.501984248 0.433739102               |
| 0.933158354 | 1                                                                                                                                                                                                                                 | 1.459526545 | 1.59421806  | 0.98034323                            |
| 1.152342028 | 0.646608626                                                                                                                                                                                                                       | 0.660266949 | 1.136763901 | 1 1.073611034                         |
| 1.479596348 | 1.267497191                                                                                                                                                                                                                       | 1.083462374 | 1.791890209 | 1 1.462014538                         |
| 1.526862924 | 1.228010377                                                                                                                                                                                                                       | 1.29578582  | 1.688599927 | 1.492063293                           |
| YPL053C     | "YPL053C::KTR6::Similar to KRE2, mannosylphosphate transferase which may recognize any oligosaccharides with at least one alpha-1,2-linked mannobiose unit. Required for the transfer of mannosylphosphate to cell wall mannans." | 1           |             |                                       |
| 1.216045705 | 1.027826029                                                                                                                                                                                                                       | 1.144045731 | 1.339041153 | 1 1.02361709                          |
| 1.06112642  | 1.241508931                                                                                                                                                                                                                       | 1.104923045 | 1           | 0.818043848 0.787859617               |
| 1.055439103 |                                                                                                                                                                                                                                   | 1.156880016 | 0.554847266 | 0.493840845 1.032849531 1             |
| 0.889232223 |                                                                                                                                                                                                                                   | 0.735938369 | 0.81348324  | 1 0.648889127 0.483534164             |
| 0.347075075 | 0.920455656                                                                                                                                                                                                                       | 0.91982354  | 1           | 0.595509131 0.429102803               |
| 0.43353368  | 0.997887303                                                                                                                                                                                                                       | 1           | 0.703336225 | 0.380239527 0.683804111               |
| 1.162287695 | 1.172737041                                                                                                                                                                                                                       |             |             |                                       |
| YPL055C     | YPL055C::LGE1::large cell size mutant                                                                                                                                                                                             |             | 1           | 0.786341082                           |
| 1.136848199 | 0.757614605                                                                                                                                                                                                                       | 0.752239113 | 1           | 0.968478118 1.100554445               |
| 1.005832515 | 0.933691534                                                                                                                                                                                                                       | 1           | 1.092914172 | 1.232358868 1.178459354               |
| 0.950980318 | 1                                                                                                                                                                                                                                 | 0.804675669 | 0.912321523 | 0.824326732 1.22046991 1              |
| 1.276652662 | 2.056299558                                                                                                                                                                                                                       | 1.080648225 | 1.18221403  | 1.063655231                           |

|         |                                                                                                                                                                                                                                                   |             |             |             |             |             |             |             |
|---------|---------------------------------------------------------------------------------------------------------------------------------------------------------------------------------------------------------------------------------------------------|-------------|-------------|-------------|-------------|-------------|-------------|-------------|
|         | 1.177192919                                                                                                                                                                                                                                       | 0.883024937 | 0.932711922 | 1.197046917 | 1           | 0.785039803 |             |             |
|         | 0.862561779                                                                                                                                                                                                                                       | 1.131943507 | 1.648238013 | 1           |             | 0.836014615 | 0.613770998 |             |
|         | 0.924120724                                                                                                                                                                                                                                       | 0.465468606 | 1.183067831 |             |             |             |             |             |
| YPL057C | YPL057C::SUR1::Involved in maintenance of phospholipid levels                                                                                                                                                                                     |             |             |             |             |             | 1           |             |
|         | 0.988027716                                                                                                                                                                                                                                       | 0.767739283 | 1.006088187 | 0.715197033 | 1           | 1.122437136 |             |             |
|         | 1.194160125                                                                                                                                                                                                                                       | 0.784750427 | 0.836422197 | 1           | 0.774391689 | 0.78331263  |             |             |
|         | 0.71337355                                                                                                                                                                                                                                        | 1.103545742 | 1           | 1.626623709 | 1.126811612 | 1.704961906 |             |             |
|         | 0.938314247                                                                                                                                                                                                                                       | 1           | 0.990381439 | 0.284203571 | 0.668875634 | 1.010808789 | 1           |             |
|         | 0.700313182                                                                                                                                                                                                                                       | 0.625133699 | 1.0361099   | 1.083133238 | 1.007834864 | 1           |             |             |
|         | 0.522663414                                                                                                                                                                                                                                       | 0.437793112 | 0.613141744 | 0.549036148 | 0.624350783 | 1           |             |             |
|         | 0.769681281                                                                                                                                                                                                                                       | 0.424712003 | 1.021614762 | 0.776949383 | 0.977535487 | 0.897514579 |             |             |
| YPL059W | "YPL059W::GRX5::Member of a glutaredoxin subfamily in Sc together with GRX3 & GRX4. Significant sequence diff. with the other glutaredoxin subfamily, formed by the previously described GRX1 & GRX2 glutaredoxins (Luikenhuis MBC 9:1081, 1998)" |             |             |             |             |             | 1           |             |
|         | 1.486420103                                                                                                                                                                                                                                       | 1           | 1.059457708 | 1.385424423 | 1.622027783 | 1.494714303 | 1           |             |
|         | 1.483087798                                                                                                                                                                                                                                       | 1.703415195 | 2.001724506 | 1.342459698 | 1           | 1.699361228 |             |             |
|         | 1.351302371                                                                                                                                                                                                                                       | 1.433106629 | 1.65152669  | 1           | 1.981105922 | 1.710598749 |             |             |
|         | 1.866519791                                                                                                                                                                                                                                       | 1.491821468 | 1           | 1.490288915 | 1.295870233 | 1.036898843 |             |             |
|         | 1.182065983                                                                                                                                                                                                                                       | 0.978091033 | 1           | 1.264779461 | 1.350910505 | 1.018837828 |             |             |
|         | 1.112685453                                                                                                                                                                                                                                       | 1.817789201 |             | 1.173773099 | 1.141298417 | 0.88315928  |             |             |
|         | 1.299476062                                                                                                                                                                                                                                       | 1.152900442 | 1.199604884 |             |             |             |             |             |
| YPL073C | YPL073C::YPL073C::molecular_function unknown                                                                                                                                                                                                      |             |             |             |             |             | 1           |             |
|         | 1.113510775                                                                                                                                                                                                                                       | 1.568038147 | 1.402202328 | 1           | 1.279072909 | 1.743320794 |             |             |
|         | 1.42459304                                                                                                                                                                                                                                        | 1.110921071 | 1           | 1.255622692 | 1.20327865  | 0.92225005  |             |             |
|         | 1.370445559                                                                                                                                                                                                                                       | 1           | 0.636493895 |             | 0.688802343 | 0.451696809 |             |             |
|         | 0.451905161                                                                                                                                                                                                                                       | 0.405500978 | 1           | 0.982138783 |             | 1.057140305 |             |             |
|         | 1.176239823                                                                                                                                                                                                                                       | 1           | 0.970641582 | 0.818480698 |             | 0.947604792 | 0.859390369 |             |
|         | 1.228620284                                                                                                                                                                                                                                       | 0.714017231 | 1.132661405 | 0.620686564 | 1.537659058 |             |             |             |
| YPL075W | YPL075W::GCR1::trans-acting positive regulator of the enolase and glyceraldehyde-3-phosphate dehydrogenase gene families                                                                                                                          |             |             |             |             |             | 1           | 1.004028702 |
|         | 0.862584982                                                                                                                                                                                                                                       | 1.366993465 | 1.00914761  | 1           | 1.117657607 | 1.299933131 |             |             |
|         | 1.017704319                                                                                                                                                                                                                                       | 0.994209027 | 1           | 1.135783203 | 1.395763899 | 0.840861401 |             |             |
|         | 1.136617734                                                                                                                                                                                                                                       | 1           |             | 0.907928211 | 0.677622951 | 1           | 0.987857424 |             |
|         | 0.990434817                                                                                                                                                                                                                                       | 0.686407056 | 0.356733634 | 1           | 0.909863075 | 0.944594671 |             |             |
|         | 0.872228176                                                                                                                                                                                                                                       | 0.966855037 | 1.014899013 | 1           | 1.010116866 | 0.857650037 |             |             |
|         | 0.960485018                                                                                                                                                                                                                                       | 1.174146252 | 0.887534319 |             | 0.999922875 | 0.965823751 |             |             |
|         | 0.917568075                                                                                                                                                                                                                                       | 0.832404633 | 1.135253954 | 0.882629006 |             |             |             |             |
| YPL077C | YPL077C::YPL077C::molecular_function unknown                                                                                                                                                                                                      |             |             |             |             |             | 1           | 1.12327873  |
|         | 1.060092701                                                                                                                                                                                                                                       | 1.183391239 | 1.194692078 | 1           | 1.001627338 | 0.95244105  |             |             |
|         | 1.360067104                                                                                                                                                                                                                                       | 1.108949708 | 1           | 1.008618272 | 1.227587457 | 1.093991308 |             |             |
|         | 1.532721125                                                                                                                                                                                                                                       | 1           |             | 0.636810655 | 1.043893227 | 1           | 1.809945281 |             |
|         | 1.989738976                                                                                                                                                                                                                                       | 2.297338568 | 1.582712955 | 1           | 1.038345752 | 1.213595546 |             |             |
|         | 1.258675492                                                                                                                                                                                                                                       | 1.097057366 | 1.167776292 | 1           | 0.810311391 | 0.712720708 |             |             |
|         | 1.220852732                                                                                                                                                                                                                                       | 0.89092069  | 0.750840834 | 1           | 0.820598717 | 0.603538125 |             |             |
|         | 1.331140367                                                                                                                                                                                                                                       |             | 1.083361222 |             |             |             |             |             |
| YPL079W | YPL079W::RPL21B::Homology to rat L21                                                                                                                                                                                                              |             |             |             |             |             | 1           | 1.238059218 |
|         | 1.434040066                                                                                                                                                                                                                                       | 0.905242955 | 1.819667511 | 1           | 1.123082525 | 0.992943853 |             |             |
|         | 1.352595584                                                                                                                                                                                                                                       | 1.433009383 | 1           | 0.923425761 | 0.853823544 | 0.835734643 |             |             |
|         | 1.032899003                                                                                                                                                                                                                                       | 1           | 0.543654489 | 0.267370994 | 0.177448545 | 0.545803097 | 1           |             |
|         | 1.250792871                                                                                                                                                                                                                                       | 0.820043012 | 0.693227226 | 0.969734701 | 1           | 1.063639511 |             |             |
|         | 0.899749413                                                                                                                                                                                                                                       | 0.63525779  | 0.919844442 | 1.116964436 | 1           | 1.236796739 |             |             |
|         | 1.722804806                                                                                                                                                                                                                                       | 1.031733729 | 0.643933555 | 1.731371634 | 1           | 1.153821623 |             |             |
|         | 1.197891163                                                                                                                                                                                                                                       | 0.885422117 | 1.671476206 | 1.166650849 | 1.209236781 |             |             |             |
| YOL053W | YOL053W::YOL053W::molecular_function unknown                                                                                                                                                                                                      |             |             |             |             |             | 1           | 1.008861424 |
|         | 1.336230426                                                                                                                                                                                                                                       | 1.230439787 | 1.548435558 | 1           | 1.152536783 | 1.223253444 |             |             |
|         | 1.398318683                                                                                                                                                                                                                                       | 1.414384015 | 1           | 1.222812758 | 1.457031074 | 0.387326331 |             |             |

|             |                                                                                                                                                                                                                          |             |             |             |             |
|-------------|--------------------------------------------------------------------------------------------------------------------------------------------------------------------------------------------------------------------------|-------------|-------------|-------------|-------------|
| 1.744459304 | 1                                                                                                                                                                                                                        | 1.588740688 | 1.027427231 | 1.972813333 | 1           |
| 1.671580627 | 2.109457048                                                                                                                                                                                                              | 1.907014142 | 1.796097626 | 1           | 1.085564873 |
| 1.325136346 | 1.075426869                                                                                                                                                                                                              | 0.797809495 | 1.139265943 | 1           | 1.075591279 |
| 1.533690836 | 1.88957459                                                                                                                                                                                                               | 1.323826182 | 1.780598227 | 1           | 1.391007706 |
| 1.466354892 | 1.302246886                                                                                                                                                                                                              | 1.085951374 | 1.494690183 |             |             |
| YPL081W     | YPL081W::RPS9A::Homology to rat S9 and E.coli S4                                                                                                                                                                         |             |             |             | 1           |
| 0.839312263 | 0.886139908                                                                                                                                                                                                              | 0.670369876 | 1.162929429 | 1           | 0.785722422 |
| 0.700553893 | 0.875713413                                                                                                                                                                                                              | 1.043139728 | 1           | 0.558456084 | 0.55402965  |
| 0.622340189 | 0.817189288                                                                                                                                                                                                              | 1           | 0.630681105 | 0.315234023 | 0.281495933 |
| 0.661276829 | 1                                                                                                                                                                                                                        | 1.238537601 | 0.693260466 | 0.669986621 | 0.948750743 |
| 1.019889518 | 0.915090817                                                                                                                                                                                                              | 0.907551357 | 1.074928829 | 1           | 1.252243882 |
| 0.942598796 | 1.333578244                                                                                                                                                                                                              | 0.856075955 | 0.626668916 | 1.294727211 | 1           |
| 1.172666183 | 1.111237441                                                                                                                                                                                                              | 0.908870188 | 1.469777488 | 1.108865613 | 1.140938049 |
| YOL055C     | YOL055C::THI20::THI for thiamine metabolism. Transcribed in the presence of low level of thiamine (10-8M) and turned off in the presence of high level (10-6M) of thiamine. Under the positive control of THI2 and THI3. |             |             |             | 1           |
| 0.947393024 | 1.035665722                                                                                                                                                                                                              | 1.163258845 | 0.869591067 | 1           | 1.104720271 |
| 1.008808281 | 1.153001662                                                                                                                                                                                                              | 1           | 0.967721998 | 1.074825984 | 1.443432287 |
| 0.880101332 | 0.582370979                                                                                                                                                                                                              | 1.168974134 | 1.326857976 | 1           | 1.739345428 |
| 1.810818811 | 2.134198045                                                                                                                                                                                                              | 1.590195893 | 1           | 1.160849677 | 1.102156862 |
| 1.158960839 | 1.078846113                                                                                                                                                                                                              | 1           | 0.83545346  | 1.026176015 | 1.039334323 |
| 0.82058556  | 1                                                                                                                                                                                                                        | 1.038002305 | 1.30958744  | 1.039525113 | 1.051410976 |
| 1.035412843 | 0.766171                                                                                                                                                                                                                 |             |             |             |             |
| YOL069W     | YOL069W::NUF2::Protein associated with spindle pole body and critical for nuclear division                                                                                                                               |             |             |             | 0.912383663 |
| 1.080781749 | 1                                                                                                                                                                                                                        | 1.033961679 | 1.010511458 | 1.12490799  | 1.222918648 |
| 0.966916847 | 1.082044493                                                                                                                                                                                                              | 1.001461054 | 1.035770331 | 1           | 0.574612567 |
| 1.953260379 | 0.63112344                                                                                                                                                                                                               | 0.613474842 | 1           | 1.504565898 | 2.130998693 |
| 1.811323412 | 0.86967523                                                                                                                                                                                                               | 1           | 0.575193415 | 0.801368263 | 0.536055447 |
| 0.938380839 | 1                                                                                                                                                                                                                        | 1.012347789 | 0.760568998 | 1.197320585 | 1.347072595 |
| 0.918024712 | 0.849750744                                                                                                                                                                                                              | 1.074509134 | 0.697364329 | 1.629369083 | 1.492063293 |
| YOL071W     | YOL071W::EMI5::Early Meiotic Induction                                                                                                                                                                                   |             |             |             | 1           |
| 1.511237974 | 1.04053494                                                                                                                                                                                                               | 0.956380207 | 1           | 0.855537031 | 1.654249195 |
| 1.540555743 | 1                                                                                                                                                                                                                        | 1.081601855 | 1.350519973 | 2.332839744 | 1.212195735 |
| 1.738046906 | 1.562351008                                                                                                                                                                                                              | 1.953181791 | 2.253324417 | 1           | 3.228110901 |
| 3.611444537 | 4.430511019                                                                                                                                                                                                              | 2.899180063 | 1           | 0.966362121 | 1.386782801 |
| 1.002591332 | 0.750389039                                                                                                                                                                                                              | 1.0366189   | 1           | 1.307633386 | 1.790226265 |
| 1.165649658 | 1.296640322                                                                                                                                                                                                              | 1.772445297 | 1           | 1.382408337 | 1.601719249 |
| 1.112462906 | 1.357169506                                                                                                                                                                                                              | 1.773029887 | 1.243386042 |             |             |
| YOL073C     | YOL073C::YOL073C::molecular_function unknown                                                                                                                                                                             |             |             |             | 1           |
| 1.253676718 | 0.62522911                                                                                                                                                                                                               | 0.396706484 | 1           |             | 0.726551046 |
| 0.652612743 | 1                                                                                                                                                                                                                        | 1.272053657 | 1.464516348 | 1.730791086 | 0.651687234 |
| 1.138172407 | 0.989229267                                                                                                                                                                                                              | 1.125854291 | 1.110979973 | 1           | 1.560715152 |
| 1.120177924 | 1.632238417                                                                                                                                                                                                              | 1.213037907 | 1           | 1.123643636 | 1.203714977 |
| 1.647910928 | 1.277569181                                                                                                                                                                                                              | 1.004671662 | 1           | 1.010943437 | 0.965261815 |
| 1.239891842 | 1.10024406                                                                                                                                                                                                               | 0.634484643 | 1           | 1.038200946 | 0.85311299  |
| 1.263927794 | 0.636371475                                                                                                                                                                                                              | 0.991563571 | 0.662847393 |             |             |
| YOL075C     | YOL075C::YOL075C::not yet annotated                                                                                                                                                                                      |             |             |             | 1           |
| 2.362374967 | 1.283214731                                                                                                                                                                                                              | 1           | 1.549848975 | 2.077595529 | 1           |
| 1.288428619 | 1.776558883                                                                                                                                                                                                              | 1.781498395 | 1.838756404 | 1           | 0.600067455 |
| 1.887560664 | 2.362746384                                                                                                                                                                                                              | 0.624024502 | 1           | 0.376523792 | 0.484817818 |
| 0.179319435 | 0.187994441                                                                                                                                                                                                              | 1           | 1.148657255 | 1.273753074 | 1.433881123 |
| 2.148556513 | 1.599842096                                                                                                                                                                                                              | 1           | 0.813949218 | 0.594907558 | 0.578659805 |
| 1.086892732 | 0.472258179                                                                                                                                                                                                              | 1           | 0.652300023 | 0.453891986 | 0.739482453 |
| 0.422367065 | 0.547040244                                                                                                                                                                                                              | 0.502608177 |             |             |             |
| YCRX07W     | YCRX07W                                                                                                                                                                                                                  |             |             |             | 1           |
|             |                                                                                                                                                                                                                          |             |             |             | 1.134203557 |
|             |                                                                                                                                                                                                                          |             |             |             | 1.059919976 |

|         |                                                                                                 |             |             |             |             |             |             |
|---------|-------------------------------------------------------------------------------------------------|-------------|-------------|-------------|-------------|-------------|-------------|
|         | 0.735659544                                                                                     | 0.738029646 |             | 1           | 1.067499087 | 1.059368041 |             |
|         | 1.101666678                                                                                     | 1.103997618 | 1.054187112 | 1           | 0.84161238  | 0.858940085 |             |
|         | 0.655414659                                                                                     | 0.646162982 | 0.839863915 | 1           | 0.91888406  | 0.821764228 |             |
|         | 0.942979555                                                                                     | 0.925529572 | 0.972324536 | 0.960559531 |             |             |             |
| YOL077C | YOL077C::BRX1::Essential nucleolar protein required for biogenesis of the 60S ribosomal subunit |             |             |             |             |             |             |
|         | 1                                                                                               | 0.944282447 | 0.81777103  | 0.84163392  |             |             |             |
|         | 1.149628807                                                                                     | 1           | 0.866184671 | 0.75168636  | 0.982029776 | 1.262557533 | 1           |
|         | 0.55754687                                                                                      | 0.362397895 | 0.341254202 | 0.941967588 | 1           | 0.411662748 |             |
|         | 0.173048745                                                                                     | 0.149587711 | 0.533944308 | 1           | 0.49626485  | 0.216386721 |             |
|         | 0.111559892                                                                                     | 0.511700603 | 1           | 0.795165555 | 0.650487917 | 0.598852131 |             |
|         | 0.839726618                                                                                     | 0.666055881 | 1           | 0.707395609 | 0.527880676 | 0.364886279 |             |
|         | 0.781665916                                                                                     | 1.094783914 | 1           | 0.71424008  | 0.571434987 | 0.671056779 |             |
|         | 1.215233667                                                                                     | 0.600937347 | 0.819584055 |             |             |             |             |
| YCRX09C | YCRX09C                                                                                         |             |             |             |             |             |             |
|         | 1                                                                                               | 1.581173904 | 1.762226393 | 1.665623458 |             |             | 1           |
|         | 1.433422825                                                                                     | 1.448394215 | 1.543378707 | 1           | 1.402425724 |             |             |
|         | 1.637479624                                                                                     | 1           | 1.288229612 |             | 1.637614256 | 1           | 0.998616545 |
|         | 1.142286912                                                                                     | 0.740271232 | 0.806135928 | 1           | 0.919785905 | 0.893193586 |             |
|         | 0.902740951                                                                                     |             |             | 0.864088434 |             |             | 1           |
|         | 0.865821437                                                                                     |             |             | 0.748658537 |             |             |             |
| YOL079W | YOL079W::YOL079W::molecular_function unknown                                                    |             |             |             |             |             |             |
|         | 1                                                                                               | 1.985480143 |             |             |             |             |             |
|         | 1.768514939                                                                                     | 1.859334239 | 1           | 1.715946426 | 1.61599111  |             | 1           |
|         | 1.667984178                                                                                     | 1.638631063 | 1.914059592 | 0.605896137 |             |             |             |
|         | 0.873635647                                                                                     | 0.79217219  |             |             | 1           |             |             |
|         | 1.106747102                                                                                     | 1.134374507 | 1.052311008 | 0.968076865 | 1           | 1.178158238 |             |
|         | 1.151675961                                                                                     | 0.785786576 | 1.207102944 | 1.026774681 | 1           | 0.964909782 |             |
|         | 0.928595655                                                                                     | 1.191783712 | 1.103986144 | 0.692618592 |             |             |             |
| YDL002C | YDL002C::NHP10::Non-Histone Protein 10                                                          |             |             |             |             |             |             |
|         | 1                                                                                               | 0.829170483 |             |             |             |             |             |
|         | 0.992872377                                                                                     | 0.959904963 | 0.997437865 | 1           | 0.92984473  | 0.904542925 |             |
|         | 1.281864728                                                                                     | 1.108263252 | 1           | 0.89990083  | 1.092895915 | 0.998383771 |             |
|         | 1.074960006                                                                                     | 1           | 1.368656937 | 1.41930835  | 1.051830301 | 1.179888186 | 1           |
|         | 1.536484669                                                                                     | 0.842367685 | 1.207078424 | 1.235030983 | 1           | 0.997684967 |             |
|         | 1.137231951                                                                                     | 1.126975245 | 1.029624269 | 1.144623709 | 1           | 0.976075258 |             |
|         | 0.795239924                                                                                     | 0.852555763 | 1.141973186 | 1.229032991 | 1           | 1.255719749 |             |
|         | 0.955601997                                                                                     | 1.127271996 | 1.014045527 | 1.350146581 | 1.314311665 |             |             |
| YOL093W | YOL093W::YOL093W::molecular_function unknown                                                    |             |             |             |             |             |             |
|         | 1                                                                                               | 0.89871625  |             |             |             |             |             |
|         | 1.11307467                                                                                      | 0.882973309 | 1.12007666  | 1           | 0.824034413 | 0.793645775 |             |
|         | 1.313092138                                                                                     | 1.425414333 | 1           | 0.831945215 | 0.793102983 | 0.87622037  | 1           |
|         | 0.575792657                                                                                     | 0.354982818 | 0.380602125 | 0.743220726 | 1           | 1.171496737 |             |
|         | 1.061433103                                                                                     | 0.832551653 | 1           | 0.917949112 | 0.918164484 | 1.009915308 |             |
|         | 0.865182132                                                                                     | 1.122028243 | 1           | 1.059663475 | 0.985618789 | 0.880810423 |             |
|         | 1.813315396                                                                                     | 1.560931448 | 1           | 0.893203205 | 0.795202192 | 0.994355931 |             |
|         | 0.738692381                                                                                     | 1.077893097 |             |             |             |             |             |
| YDL004W | YDL004W::ATP16::ATP synthase delta subunit                                                      |             |             |             |             |             |             |
|         | 1                                                                                               | 1.149439569 |             |             |             |             |             |
|         | 1.485037178                                                                                     | 1.132907828 | 1.999386661 | 1           | 1.228319829 | 1.2208165   |             |
|         | 1.493786465                                                                                     | 1.572931527 | 1           | 0.70443181  |             | 1.228516902 | 1           |
|         | 1.349917009                                                                                     | 0.967585068 | 1.037129105 | 2.03337382  | 1           | 1.493951466 |             |
|         | 1.780586339                                                                                     | 2.056173081 | 1.571857531 | 1           | 0.968474655 | 0.873973336 |             |
|         | 0.554932209                                                                                     | 0.833032296 | 0.847130216 | 1           | 0.876273579 | 1.116165702 |             |
|         | 0.717561698                                                                                     | 0.72963665  | 1.386379815 | 1           | 1.320305699 | 1.327641643 |             |
|         | 0.689659391                                                                                     | 1.6744393   | 1.845707677 | 1.298550427 |             |             |             |
| YOL095C | YOL095C::HMI1::Helicase in MITochondria                                                         |             |             |             |             |             |             |
|         | 1                                                                                               | 0.99023322  |             |             |             |             |             |
|         | 1.048296672                                                                                     | 1.550585323 | 1.34162305  | 1           | 1.281598543 | 1.444392629 |             |
|         | 1.257100652                                                                                     | 1.03954717  | 1           | 1.189726359 | 0.942605144 | 0.609594368 |             |
|         | 1.173545181                                                                                     | 1           | 0.398210445 | 0.418508494 | 0.445992389 | 0.587462381 | 1           |
|         | 0.598725023                                                                                     | 0.927283749 | 1.862024151 | 1.120381889 | 1           | 0.759783281 |             |
|         | 0.642313566                                                                                     | 0.696143921 | 0.60654095  | 0.882157159 | 1           | 1.064086133 |             |

0.787260548 0.744135064 0.913432195 0.806709123 1 1.110721664  
 0.867205047 1.100557818 0.881038363 1.300787521 0.816081552  
 YDL006W YDL006W::PTC1::serine-threonine protein phosphatase 1  
 1.317613226 1.46994845 1.24169229 1.581290711 1 1.234499067  
 1.135788123 1.587943649 1.288369543 1 1.161491333 1.397300189  
 1.316221697 1.208582594 1 1.555775518 1.418037464 1.257756154  
 1.327272369 1 2.132892654 1.61109802 1.838262992 1.124226727 1  
 1.030859157 1.035899411 0.772266265 0.789394404 1.069614738 1  
 1.137920889 1.34720541 0.92522691 0.799090437 1.600175468 1  
 1.493270527 1.737458243 1.064627291 1.523711828 1.692646001 1.248639823  
 YDL008w YDL008w::APC11::subunit of the Anaphase Promoting Complex; all known  
 APC subunits co-immunoprecipitate with epitope-tagged Apc11p 1  
 1.039496643 1.18739608 0.996265214 1.560168067 1 0.907378786  
 0.920352662 1.63602988 1.280917263 1 1.03459863 1.211114033  
 1.320316673 1.197679215 1 1.416670487 0.827707709 1.193598504  
 1.821046753 1 1.982479592 2.323405119 1.991788414 1.292416205 1  
 1.021249256 1.157987603 0.648312528 0.777873327 0.91186981 1  
 0.901730283 1.378433987 0.883172258 0.827240441 1.276063249 1  
 0.99512919 1.313407297 0.967385301 1.243138894 1.187417308 1.203983  
 YDL010w YDL010w::YDL010W::molecular\_function unknown 1 0.918067491  
 1.45352446 1.117523119 1.610939951 1 1.028458156 1.043911216  
 1.496221311 1.229401188 1 1.209671414 1.504975617 1.314474743 1  
 1.408534281 0.834574829 1.192997944 1.879501093 1 2.081560994  
 1.751330368 1.680864004 1 0.904518897 1.188984971 0.760550011  
 0.524893108 0.94050982 1 1.278281706 2.153376901 1.809732081  
 1.850606197 1.636252217 1 1.410055141 1.740051375 1.385134357  
 1.560374193 1.283461971 1.47980461  
 YDL012c YDL012c::YDL012C::molecular\_function unknown 1 1.000876629  
 1.356154157 0.967464754 1.317375195 1 1.043435319 1.072911093  
 1.283695265 1 0.955315984 1.087377354 1.420847714 1.16025005 1  
 1.114514899 1.018807204 0.987177642 1.235674947 1 1.009157123  
 1.159798058 0.774387049 0.823208428 1 0.963582021 0.903165773  
 0.94921937 0.795936644 0.963726239 1 0.956220342 1.041633061  
 0.915797155 0.895570903 0.927357459 1 1.126495634 0.991092044  
 1.098083272 0.897617328 1.032980312 0.945673958  
 YDL026w YDL026w::YDL026W::molecular\_function unknown 1 0.99572588  
 0.890125891 1.349687721 1.214544633 1 1.230756377 1.115362831  
 0.892194628 1.040883358 1 1.048069804 1.119871633 1.031028724  
 1.11070569 1 1.383074215 1.166909462 1 1.026673527  
 2.213363754 1.357331367 1.225054669 1 1.025230075 1.355749413  
 1.333156342 1.344159294 1 1.058533983 0.852861705 1.142656824  
 0.937254429 0.883546863 1 0.861289075 0.626489351 0.788634128  
 0.595649573 1.483946306 0.488598217  
 YDL028C YDL028C::MPS1::Required for spindle pole body duplication and a  
 mitotic checkpoint function. 1 0.716791456 0.710315171 0.928140661  
 1.045337851 1 0.919499656 1.05823329 0.702725394 0.780594668 1  
 0.718882619 0.754332792 0.588596828 0.940132035 1 0.947943738  
 0.912981233 1 1.118234684 0.918742547 1.008517043

0.925534604

YJL079C "YJL079C::PRY1::Pathogen Related in Sc, contains homology to the  
 plant PR-1 class of pathogen related proteins. The protein sequence is over 60%  
 identical with the Pry2p & Pry3p over 145 resid. PRY1 is >35% identical (50%  
 similar) to tobacco PR-1c protein." 1 0.91223231 0.701501856 0.564223696  
 0.536950079 1 0.953190868 1.004695174 0.695426639 0.720362801 1  
 1.468022511 1.503907084 2.526294681 0.742658453 1 0.792455175  
 0.854386207 1.652301186 1.337344226 1 0.60839906 0.981094962

1.128724947 1.090394251 1 1.28240498 1.266705422 2.360180672  
1.757237614 1.253234889 1 0.765679171 1.058909917 1.475759465  
3.217102389 2.28874809 1 0.837229184 0.892435124 1.252440534  
0.747281804 3.220169777 0.985077  
YJL081C YJL081C::ARP4::54.8 kDa actin-related protein 1 0.698748687  
0.804270766 0.829111235 0.744327123 1 0.875934103 0.797237194  
0.934705889 0.892522357 1 0.72766023 0.669061697 0.616440912  
0.927742107 1 0.636817332 0.452799843 0.451152236 0.836920757 1  
1.42511206 1.228228164 1.361206972 1.131798164 1 0.945448072  
0.960883342 0.924946437 0.871228994 0.935866292 1 1.036986938  
0.924819125 1.007894434 0.888885344 1.043425727 1 0.988792744  
1.001172687 1.007274705 0.802758158 1.232124916 1.443904019  
YJL083W YJL083W::YJL083W::molecular\_function unknown 1 1.072984682  
1.014215225 0.761130499 1 1.211590031 1.264827538  
0.655549554 1 1.422003942 1.384283095 0.83834836 0.657811549 1  
0.425767029 0.600828544 1 0.695909114 0.978982448  
0.728235947 1 0.860848856 1.036766134 1.127717446 0.910519198 1  
0.595167906 1.484749629 1 0.455872941  
0.931241182 0.992630257 0.806449707  
YJL085W YJL085W::EXO70::70 kDa exocyst component protein; the exocyst  
proteins are required for exocytosis late in the secretory pathway 1  
1.509945299 1.579189874 1.66788665 1 1.563089905 1.595686369  
1.956282974 1.273134499 1 1.566596154 1.629514225 1.40764579  
1.70340843 1 0.743188389 0.464466298 0.837980176 1.184967824 1  
1.510336921 1.622908196 2.333883485 1.186016384 1 1.061917425  
1.031940003 0.837025492 0.717247047 0.920902967 1 1.22853256  
1.204653826 0.969698627 1.181482762 1.714430245 1 1.479121493  
1.213760303 1.34056129 1.187762971 1.536540096 0.915027042  
YPL083C YPL083C::SEN54::Trna splicing endonuclease 54kDa subunit 1  
1.213430239 1.157026937 1.459239097 1.388649983 1 1.142961717  
1.117284045 1.37202222 1.189321571 1 0.898462844 0.96626323  
0.890794254 1.266885412 1.411108165 0.873635647 1.041101383  
1 0.856407483 0.851391447 0.838759375  
0.744342714 0.78862094 1 0.935288908 0.945021833 0.919457059  
0.904839562 1.052459101 1 1.028595822 0.985635224 0.97381227  
1.157924326 1.010908514 1.957019548  
YJL099W YJL099W::CHS6::Involved in chitin biosynthesis and/or its regulation  
1 0.751358387 0.916895033 1.143645199 0.942447083 1 1.040954181  
1.069409765 0.98629059 1 1.10355468 1.223450012 0.916366974  
1.104745232 1 0.457916788 0.693277182 1.104533911 1  
1.523191893 2.425203733 2.515607208 1.066801617 1 1.138567704  
1.251153997 0.987311289 0.91352983 0.87273664 1 1.11252437  
0.807486458 0.883347195 0.993499487 0.877172476 1 1.198728563  
1.051634473 1.182845112 0.636196785 1.039866 0.951803299  
YPL097W YPL097W::MSY1::Tyrosyl-tRNA synthetase 1 1.224894413  
1.139522925 1.385228137 1.285621045 1 1.274795096 1.147568676  
1.250348079 1.153396229 1 1.174152147 1.027640867 1.208673046  
1.052410426 1.340231093 1.029727635  
1 1.184852018 1.105648416 0.948629308 0.922132499 1.08258572 1  
1.314006633 1.214650111 1.179835905 0.843938842 1.462720609 1  
1.274275013 1.25027367 0.916234303 1.010957605 1.563671074 0.901892695  
YJL101C YJL101C::GSH1::Glutathione biosynthesis 1 0.997545885  
0.870637164 0.847826424 0.62310836 1 1.060011206 1.058012236  
0.72354274 0.606726216 1 2.682045636 2.227059517 0.878734223  
0.795772046 1 5.503862121 3.310791806 2.800905293 2.073335129 1  
4.699833571 2.163816257 2.395505703 1.681403553 1 2.351560143  
2.284641056 1.511025491 1.077756179 0.761001078 1 2.384038862



1.811102741 1.614759714 1.16232928 0.926878287 1 2.968861858  
2.301460753 1.39069465 0.688362577 0.763659694 1.393993415  
YPL099C YPL099C::YPL099C::molecular\_function unknown 1 1.228710361  
1.653697983 1.133998652 1.489272601 1 1.149097898 1.151185507  
1.514430355 1.281791465 1 1.211282335 1.274922119 1.462403938  
1.223830127 1 1.200964752 0.835676836 0.53698904 0.840442607 1  
1.488418336 2.092350915 1.348692555 1 1.186764469 1.385749373  
1.151809598 0.896077511 1.025654987 1 1.127653965 1.557856643  
1.287747298 1.046454405 1.500954089 1 1.442117258 1.597294818  
1.08377213 1.495408416 1.590328104 1.824800513  
YJL103C YJL103C::YJL103C::molecular\_function unknown 1 0.994392931  
1.237792722 1.16448394 1.19228855 1 1.388041541 1.317507495  
0.918820982 1 1.200777421 1.234377896 1.320728861 1.117064737 1  
1.161614732 0.708349081 1.561831406 1.270172991 1 2.16775509  
3.077400231 3.627349366 1.094351044 1 1.223877026 0.837081645  
0.790117481 1 0.924638775 0.760704079 1.938231965 1  
1.402601266 0.870141673 1.288974153 1.057727941 2.291431615 0.794190973  
YPL101W "YPL101W::ELP4::ELongator Protein 4; 50kD subunit. Homolog of  
ATPases, yet with substitutions of amino acids critical for ATP hydrolysis." 1  
0.887217969 0.775148625 0.99027618 0.725321138 1 0.769155245  
0.8034825 0.93088721 0.831723746 1 0.754598892 0.649606795  
0.607975822 0.892308698 1 0.637029888 0.376073232 0.424296066  
0.508046034 1 0.875582863 0.455607062 0.762006845 1  
0.957349843 0.736458251 0.881517231 1.04091119 0.883183649 1  
0.886104846 0.84310558 0.778145252 0.902152892 0.70939051 1  
0.75173141 0.608499933 0.862859693 0.642446051 0.635181097 0.570906857  
YJL105W YJL105W::SET4 1 1.243672633 0.884412606 1.02480382  
0.899553772 1 1.126787347 1.129288246 0.941782388 1  
0.817841638 0.744939795 0.673288004 0.860326489 1 0.603113546  
0.765815195 0.775303889 1 1.390810619 2.803371142 1.015412931  
0.72332089 1 1.082246189 0.967855016 1.210503932 1.448031388  
1.211272687 1 1 0.447973624  
0.881059496 0.975502948 0.802071592  
YPL103C YPL103C::YPL103C::molecular\_function unknown 1 0.861202259  
0.859410117 0.935933227 0.787688672 1 1.184135803 0.874474799  
0.860099284 1 1.06939525 1.008652085 0.8326966 0.894105036 1  
0.66966758 0.435774364 0.670704407 0.77089566 1 1.389601461  
2.49372915 1.83996802 1.091996845 1 1.234428087 1.132218675  
1.104509036 1.093634768 1.068243069 1 1.137213966 1.006748962  
1.029680306 0.945061179 0.937979963 1 1.189792845 0.79358905  
0.905150442 0.57413004 0.951050536 0.76879789  
YJL107C YJL107C::YJL107C::molecular\_function unknown 1 0.78842926  
0.829225774 1.169300501 0.812413926 1 1.223385794 0.96962702  
0.830560521 1 0.876111515 0.827451559 0.69695741 0.80096772 1  
0.471412438 0.454159884 0.529364027 0.652759874 1 1.280303215  
1.899385212 1.134752688 0.82000888 1 0.910000415  
0.960522116 0.592304383 0.645023745 1  
0.79265706 0.094089798 0.841474686  
YPL105C YPL105C::YPL105C::molecular\_function unknown 1 0.727967304  
0.714247521 0.878940593 0.71305043 1 0.95171649 0.96719696  
0.854273377 0.738759544 1 0.840841171 0.785444696 0.652774007  
0.912002742 1 0.676207997 0.662529563 0.929058424 0.467500435 1  
0.708286543 0.715941115 0.764367321 1 0.830746432 0.90565622  
0.929871309 0.744793553 0.952329817 1 0.807896721 0.73264502  
0.771233488 0.840422946 0.812764302 1 0.88892411 0.850222326  
0.93561738 0.839750651 0.76233872 0.979823219

YJL109C YJL109C::UTP10::part of small (ribosomal) subunit (SSU) processosome  
(contains U3 snoRNA) 1 1.398185181 0.863560791 1.160543021 0.939998129 1  
0.950222975 1.085891185 0.978352527 1.007665285 1 0.987363616  
0.523345626 0.496226408 0.996622512 0.657085468 0.344289912  
1 0.383726559 1 0.686508895 0.47569301  
0.428613849 1.148348116 0.66900593 1 0.64171541 0.319543342  
0.350834842 0.618944814 0.400215221 1 0.568243353 0.491917859  
0.876213308 0.727474144 0.420870743 0.567404354  
YPL107W YPL107W::YPL107W::molecular\_function unknown 1 1.192000456  
1.502919638 1.345139764 1.811971958 1 1.135865598 1.296711115  
1.695072524 1.814997103 1 1.168967968 1.498760756 1.790465926  
1.650876385 1 1.41243338 1.043974656 1.113006823 1  
1.594064282 1.516283269 1.886720616 1.327545234 0.889042301  
1.245302594 1.018408624 0.826060858 0.894675322 1 1.103012619  
1.304391168 1.763077419 2.621633292 0.862433488  
0.944678065 0.877107819 1.256426124 1.179465531  
YPL121C YPL121C::MEI5::Meiotic protein required for synapsis and meiotic  
recombination 1.196456936  
1.077866841 1 1.153770505 1  
1 0.812146895 0.822936651  
1.070012531  
YPL123C YPL123C::RNY1::RiboNuclease from Yeast 1 1.268768231  
1.896011967 2.008370198 1.865473989 1 1.528355989 2.071394289  
2.211749687 1.748405761 1 1.706558438 2.959662236 3.576622324  
2.13323772 1 3.76672132 3.887095123 3.954056958 2.576514793 1  
2.837602782 2.626693495 3.81439131 2.290115715 0.835403044  
0.832962879 0.996181437 0.883264618 0.83630614 1 0.852852313  
1.274436242 1.289100556 1.405989175 1.071570701 1.224905471  
1.04999453 1.146868587 0.757620269 1.538471341  
YOL097C "YOL097C::WRS1::W = IUPAC for tryptophan, RS = convention for  
aminoacyl-tRNA synthetases" 1 0.934437209 0.742278594 0.911430492  
0.85301698 1 0.905958197 0.907836546 0.727734476 0.884776559 1  
0.805977229 0.646027313 0.395037738 0.769738986 1 0.541525822  
0.337057059 0.370401917 0.462252062 1 0.76375748 0.452419301  
0.457391746 0.74981332 1 1.193511775 1.046394322 1.091834188  
1.317470007 1.009027619 1 1.016360309 0.949648589 0.626575771  
0.49430216 0.765250987 1 1.177870628 1.020520627 0.841723144  
1.101286702 0.743045157 0.877375225  
YPL125W YPL125W::KAP120::karyopherin 1.012117947 0.856391107  
1.379792128 0.887924888 1.19377781 1.100578736 0.847987181  
0.880947517 0.822241002 1.013292891 1.194366608 1  
1 0.872684336 0.871940288  
1.081184412 1.041425391 0.963803366 1 0.989710939 0.933585059  
0.976772276 0.631589679 1 1.024219709 0.977722393 0.946330792  
0.946498573 0.808686515 1.591008836  
YOL099C YOL099C::YOL099C::molecular\_function unknown 1 0.84889383  
1.186613133 0.72331647 1.360923842 1 0.812642713 0.761079196  
1.042344054 1.090917639 1 0.792472548 0.878012963 1.543320171  
0.877265501 1 1.034667005 1.030565847 1.09499649 1.173596149 1  
1.268556395 3.402348975 2.464972723 1.216091266 1 0.900426715  
0.849938871 0.598881431 0.636575559 0.747070654 1 0.966074569  
1.392213085 1.488573561 1.355668588 1.58014741 1 1.308214823  
1.573095285 1.014480616 1.526703748 1.818153542 1.196977994  
YOL101C YOL101C::YOL101C::molecular\_function unknown 0.996111202  
0.876889838 0.900107538 1.057286562 0.762277114 0.781738165  
0.749903079 0.80598038 0.881098773 0.964304179

|         |                                                                                                                                                                                             |             |             |             |             |  |             |             |
|---------|---------------------------------------------------------------------------------------------------------------------------------------------------------------------------------------------|-------------|-------------|-------------|-------------|--|-------------|-------------|
|         | 1.3448825                                                                                                                                                                                   |             |             |             | 1           |  | 1.358296491 |             |
|         | 1.266802976                                                                                                                                                                                 | 1.36886699  | 1.487203871 | 1.307407023 | 1           |  | 1.112281513 |             |
|         | 1.703365261                                                                                                                                                                                 | 1.082546519 | 1.003061626 | 1.423657771 | 1           |  | 0.999046537 |             |
|         | 1.201328209                                                                                                                                                                                 | 0.873332077 | 1.254670953 | 1.006537939 | 0.894887689 |  |             |             |
| YOL103W | YOL103W::ITR2::member of sugar transporter superfamily                                                                                                                                      |             |             |             |             |  | 1           |             |
|         | 0.94359029                                                                                                                                                                                  | 0.817063476 | 1.095017364 | 0.660507992 | 1           |  | 1.097973329 |             |
|         | 1.065116435                                                                                                                                                                                 | 0.880082954 | 0.974394591 | 1           | 0.86815716  |  | 0.829039961 |             |
|         | 0.660933699                                                                                                                                                                                 | 1.125364575 | 1           | 0.924700347 | 0.821646611 |  | 0.997857734 |             |
|         | 0.804915965                                                                                                                                                                                 |             | 1.222375294 | 0.896811623 | 0.825060095 |  | 0.849051674 |             |
|         | 0.824649254                                                                                                                                                                                 | 0.810009982 | 0.905315962 | 1.026371853 | 0.843718487 |  | 1           |             |
|         | 0.902578809                                                                                                                                                                                 | 0.736916404 | 0.718075393 | 0.778293492 | 0.593439914 |  | 1           |             |
|         | 0.996107236                                                                                                                                                                                 | 0.87335761  | 0.974177577 | 0.859042744 | 0.973174891 |  | 0.822210945 |             |
| YOR047C | YOR047C::STD1::interacts with the SNF1 protein kinase and TBP in two-hybrid and in in vitro binding studies                                                                                 |             |             |             |             |  | 1           | 0.720437575 |
|         | 0.767948573                                                                                                                                                                                 | 0.820294511 | 1           | 0.893097387 | 0.843263346 |  | 0.99915726  |             |
|         | 0.488704351                                                                                                                                                                                 | 0.69917549  | 0.570758817 | 0.762819438 | 1           |  | 0.858408373 |             |
|         | 0.853520864                                                                                                                                                                                 | 0.680173252 | 0.932714947 | 1           | 1.001835119 |  | 0.933091601 |             |
|         | 0.916045256                                                                                                                                                                                 | 1.119407753 | 1           | 0.97641392  | 0.872426714 |  | 0.808981837 |             |
|         | 0.877365981                                                                                                                                                                                 | 1.097667264 | 1           | 0.89112793  | 0.806846934 |  | 0.902841087 |             |
|         | 0.88209694                                                                                                                                                                                  | 0.895708999 | 1           | 0.903304134 | 0.910597149 |  | 1.129330913 |             |
|         | 1.295137514                                                                                                                                                                                 | 0.980996094 | 0.813454714 |             |             |  |             |             |
| YOR049C | YOR049C::RSB1::Resistance to Sphingoid long-chain Base. Putative transporter or flippase that translocates LCBs from the cytoplasmic side toward the extracytoplasmic side of the membrane. |             |             |             |             |  | 1           | 0.859565403 |
|         | 0.932600636                                                                                                                                                                                 | 0.993037797 | 1           | 1.07986485  | 1.016730171 |  | 0.793285586 |             |
|         | 1.784449317                                                                                                                                                                                 | 1.366643922 | 1.184232682 | 0.967570788 | 1           |  | 4.073603812 |             |
|         | 1.564586299                                                                                                                                                                                 | 2.515984197 | 1.630530241 | 1           | 1.784350733 |  | 2.052425131 |             |
|         | 1.044542036                                                                                                                                                                                 | 0.903956931 | 1           | 0.857570996 | 1.030162566 |  | 0.774225394 |             |
|         | 0.678448791                                                                                                                                                                                 | 0.69555225  | 1           | 0.921292884 | 0.614582749 |  | 0.910658256 |             |
|         | 0.609031845                                                                                                                                                                                 | 0.677695156 | 1           | 0.946785753 | 0.525658268 |  | 0.313109168 |             |
|         | 0.687250547                                                                                                                                                                                 | 0.51430917  | 1.690829939 |             |             |  |             |             |
| YDL030W | "YDL030W::PRP9::involved in pre-spliceosome assembly, important for U2 snRNP addition"                                                                                                      |             |             |             |             |  | 1           | 1.408715125 |
|         | 1.281070374                                                                                                                                                                                 | 1.325106307 | 1.318896304 | 1.454996566 | 1           |  | 1.588185747 |             |
|         | 1.595603694                                                                                                                                                                                 | 1.254417647 | 1           | 1.191929859 | 0.979058476 |  | 1.250155094 |             |
|         | 1.009407258                                                                                                                                                                                 | 1           | 0.888928677 | 1.277178321 |             |  | 0.726983285 |             |
|         | 0.961819006                                                                                                                                                                                 |             | 1.020025537 |             |             |  | 1.757562118 |             |
|         | 1.031738599                                                                                                                                                                                 |             | 1.00515411  | 1.203903718 | 0.921143898 |  | 0.730270408 |             |
| YOR051C | YOR051C::YOR051C::molecular_function unknown                                                                                                                                                |             |             |             |             |  | 1           | 0.825372802 |
|         | 0.846321232                                                                                                                                                                                 | 0.875106441 | 1.048774429 | 1           | 0.913571508 |  | 0.799887652 |             |
|         | 0.904453867                                                                                                                                                                                 | 0.995802929 | 1           | 0.807117591 | 0.677469672 |  | 0.555712328 |             |
|         | 0.885592616                                                                                                                                                                                 | 1           | 0.835201193 | 0.458797166 | 0.481747426 |  | 0.694054859 |             |
|         | 0.934238703                                                                                                                                                                                 | 0.622415216 | 0.48558287  | 0.622737557 | 1           |  | 0.817981372 |             |
|         | 0.779083052                                                                                                                                                                                 | 0.717582468 | 1.000969239 | 1.471985923 | 1           |  | 1.350983327 |             |
|         | 0.968986485                                                                                                                                                                                 | 0.651780048 | 0.956559278 | 0.949088613 | 1           |  | 1.066606987 |             |
|         | 0.637504315                                                                                                                                                                                 | 0.857252191 | 1.386154859 | 0.769662288 | 0.886131457 |  |             |             |
| YDL032w | YDL032w::YDL032W::molecular_function unknown                                                                                                                                                |             |             |             |             |  | 1           | 1.347781393 |
|         | 1.329869938                                                                                                                                                                                 | 1.792032561 | 1.278617794 | 1           | 1.357483245 |  | 1.422894411 |             |
|         | 1.359548427                                                                                                                                                                                 | 1           | 1.114448198 | 1.419452769 | 1.27601774  |  | 1.341143794 |             |
|         |                                                                                                                                                                                             | 0.727282474 |             | 0.242146741 |             |  |             |             |
|         | 0.934692766                                                                                                                                                                                 |             |             |             | 0.783764736 |  |             |             |
|         | 1                                                                                                                                                                                           | 0.93802578  | 0.706370645 | 0.860768897 | 0.584643111 |  | 0.802071592 |             |
| YOR053W | YOR053W::YOR053W::molecular_function unknown                                                                                                                                                |             |             |             |             |  | 1           | 1.216121307 |
|         | 1.387977724                                                                                                                                                                                 | 1.225638429 | 1.335980503 | 1           | 1.177057695 |  | 1.158594934 |             |
|         | 1.185492322                                                                                                                                                                                 | 1.29575119  | 1           | 1.293516435 | 1.362875591 |  | 1.725978841 |             |
|         | 1.260170003                                                                                                                                                                                 | 1           | 1.287236418 | 1.400833835 | 1.296037395 |  | 1.619337682 |             |
|         | 1.45620507                                                                                                                                                                                  | 2.202217797 | 1.655230496 | 0.808025565 | 1           |  | 1.23892776  |             |

1.648094983 0.99526404 0.939129283 1.623553729 1 1.590121754  
1.97193656 1.519146737 1.543340772 1.664025674 1 1.249414197  
2.063925762 1.105051694 1.84820647 1.457284901 1.415883994  
YDL034w YDL034w::YDL034W::molecular\_function unknown 1 1.454288962  
1.238882649 1.824591434 1 1.390806761 1.364170286 1.134246287  
1.375174509 1 1.377145861 1.394484979 1.298485485 1.435227683  
0.638471166 0.994137171 0.49510766 1 1.071926552  
1 0.843279242 0.796732153 0.575806789 0.762577142 0.823158044 1  
0.899394513 0.795157501 1.069869963 1.587384281 1 1.126195857  
1.065739212 1.814827195 0.825410542 0.937793286  
YOR055W YOR055W::YOR055W::molecular\_function unknown 1 1.043643364  
1.287941079 1.322780751 1.160503376 1 1.243189182 1.287429781  
1.176002039 1.330757249 1 1.150365282 1.278188265 1.004630527  
1.35849245 1 0.998158037 1.091571879 1.177659941 1.208856142 1  
1.547492467 1.765443958 1.392912395 1 0.864011912 1.204681974  
1.118338088 1.208028046 1.042273363 1 0.834640444 0.694701372  
0.777042995 0.696173324 0.432150971 1 0.967764846 0.642205628  
0.947199911 0.807715823 0.738232903 0.887007122  
YOR057W YOR057W::SGT1::G2 allele of skp1 suppressor; subunit of SCF  
ubiquitin ligase complex; essential regulator of cell cycle; essential component  
of kinetochore assembly pathway. 1 0.812347835 0.942610566 0.910974368  
1.253606229 1 0.810018574 1.081890116 1 0.842408755  
0.842112045 0.988920094 0.96656833 1 1.294646933 1.041753929  
0.819454995 1.927707365 1 1.811878689 2.484891369 2.219167731  
2.189809275 1 1.126889229 1.477749291 1.598737886 0.950611557  
1.210657391 1 1.422890605 1.434967751 1.966739669 1.319204811  
0.739476575 1.478295075 1.828930608 1.401214378 0.823500286  
0.93253961  
YDL036c YDL036c::YDL036C::molecular\_function unknown 1 0.763490941  
1.118320035 0.886087888 1.132627716 1 0.855618372 0.735716937  
1.07158673 1.087082132 1 0.860289069 0.850900221 1.344968359  
0.910990543 1 1.095694557 0.887924389 0.91973228 1.460430259 1  
0.804309794 1.930162126 1.044269241 0.680598089 1 0.760004038  
0.74947653 0.695804753 0.663639591 0.820311126 1 1.454001694  
1.525550898 3.442590177 3.687018243 3.852594224 1 0.870169698  
1.52444641 1.136884607 1.663966637 0.967265945 1.461416482  
YDL050c YDL050c::YDL050C::molecular\_function unknown 1 1.157316181  
1.186570037 0.936913249 1.740450953 1 0.957148596 0.720276028  
1.369274956 1.519684962 1 0.898948744 0.74498794 0.820224746  
1.326764385 1 0.601350498 0.369437445 0.370907537 0.711180317 1  
0.972122908 0.749561935 0.469808832 0.548409164 1.046495905  
0.864839062 1.03160653 1.25133161  
1.164682873 1.13236239 1.09715689  
YDL052C YDL052C::SLC1::fatty acyltransferase homologous to E. coli plsC  
gene; functionally complements plsC mutants 1 1.19562162 1.121108241  
1.152680264 0.881917672 1 1.220635505 1.119837973 1.196743598 1  
0.992801661 1.012890032 1.325243792 1.062767879 1 1.483450671  
1.181032077 1.524689904 1.487920427 1 1.000414669 1.166843254  
1.326925201 0.840010438 1 1.403706301 1.245149667 1.577844733  
1.339047302 1.154575949 1 0.933943894 1.017622181 1.696834298  
0.776828277 0.846148796 1 1.198708062 1.171718996 1.056210209  
0.983308152 0.931873976 1.103286232  
YDL054c YDL054c::MCH1::Monocarboxylate Permease Homologue 1  
1.029683075 0.82167598 0.982143567 0.737052813 1 0.992500311  
1.004680592 0.748731882 1 1.926881233 1.246029433 0.860504092  
0.783942824 1 2.008258504 1.239685868 1.472979122 1.067152292 1  
1.410279964 1.122085854 1.165005682 0.728273734 1 1.560566494

1.250601399 1.300944433 1.265215901 1.122695296 1 0.985912737  
0.685274241 1.192651607 0.773504975 0.559843681 1 1.154153462  
0.748592254 0.835827147 0.72423163 1.05468295 0.734648524  
YDL056W YDL056W::MBP1::transcription factor 1 0.705604464 0.863568946  
0.838198031 0.882028846 1 0.812164062 0.849356536 0.736319065  
0.786219697 1 0.803043565 0.847926164 0.73506161 0.860439421 1  
1.36563755 0.739818836 1.227012272 1.00412168 1 1.295784882  
1.836155226 1.506065419 0.968034218 1 1.208665887 1.15005643  
1.075558948 1.221081652 1.21248225 1 0.705382974 0.864869475  
0.952972289 0.662920384 1 0.691672357 0.656831033 0.846273917  
0.840355108 0.934687304 0.779305347  
YDL058W "YDL058W::USO1::involved intracellular protein transport, coiled-  
coil protein necessary for protein transport from ER to Golgi" 1  
0.863501456 0.77979458 1.21650599 0.924857803 1 1.091678681  
0.933994241 0.889714237 0.823789627 1 1.050148929 0.915179168  
0.536990501 1.044843173 1 0.871627591 0.591092013 0.578636962 1  
0.790166094 0.677786225 0.486699507 0.534534561 1 0.86771337  
0.883424191 1.018768123 0.944196542 0.977250821 1 1.004366045  
0.764303067 1.260103186 1.045239684 0.811634189 1 1.00244733  
1.013870355 1.096621645 0.94597393 0.790415752 0.76879789  
YDL060w YDL060w::TSR1 1 0.56700183 0.481789237 0.646779805  
0.655131169 1 0.565605727 0.591122386 0.722419898 1  
0.372186045 0.308624631 0.260070917 0.699824965 1 0.371968334  
0.342272757 0.373328758 0.582884257 1 0.340263828 0.330623492  
0.234020944 0.58299953 0.943822872 0.726196366 1.003489393  
0.934863942 0.912429598  
0.907332196 1.146960125 0.731738813 0.806449707  
YJL123C YJL123C::YJL123C::molecular\_function unknown 1 0.575196056  
0.86128976 0.816105373 0.903237161 1 0.754749914 0.798265104  
0.976337099 0.967895799 1 0.646615307 0.807352315 0.869255239  
1.031096324 1 0.924580697 0.869772742 1.242176041 1  
1.623733811 1.097377267 1.654141855 1.662986115 1 0.937312902  
1.210593121 0.940296494 0.717167393 1.079124362 1 1.257339166  
1.319831544 1.381798254 1.291383622 1.317346466 1 1.156335576  
1.123458162 1.154724728 1.048453686 1.10734691 1.219744238  
YJL125C YJL125C::GCD14::General Control Derepression 1.109389615  
1.03632441 1.131563713 1.238395771 0.949210727 0.957789081  
1.501202361 1.683836294 0.726996078 0.633572459 0.583114449  
1.251147939 1 0.242700377 0.211930778 0.610588713 1  
0.480528175 0.708351625 0.695202056 0.866337316 1 0.567638905  
0.549703518 0.398997931 0.745045133 0.798590566 1 0.609845166  
0.57031671 0.594439305 0.925369661 1.03028278 1 0.601653408  
0.57898877 0.88589197 0.797502752 0.705017571 0.845852802  
YJL127C YJL127C::SPT10::chromatin maintenance and transcriptional regulation  
1 1.829576421 1.510417168 1.479430695 1.432781138 1 1.360381838  
1.309530382 1.433773607 1.40206527 1 1.368125586 1.306628182  
1.359635014 1.353123026 0.964221788 0.654498326 0.808005392  
0.840307691 1 1.242340569 1.102770113 0.714262098  
0.85023945 0.842166935 1.0335635 0.898777472 1.00758619 1  
0.879147677 0.96926309 0.921286197 0.768238984 0.509568944 1  
0.981257604 0.875624  
YJL129C YJL129C::TRK1::180 kDa high affinity potassium transporter 1  
0.93986547 0.85347697 1.079487015 0.906060301 1 1.015539439  
1.037540389 1.009084602 0.823252208 1 0.968388187 0.790861574  
0.50174399 1.05723345 1 0.508469558 0.449295393 0.472255121  
0.475721761 1 0.545003094 0.575337834 0.657351941 1  
0.869518711 0.706244029 0.829183553 1.042247202 0.875360364 1

0.623982143 0.469532358 0.574192295 0.79551826 0.69966666 1  
 0.585219606 0.595862258 1.121753117 0.956003616 0.957527789 1.272281628  
 YPL127C YPL127C::HHO1::Histone H1 1 1.135687378 1.156423966  
 1.039804286 1.28767167 1 1.08264614 1.392419879 1.075797418  
 1.239402346 1 0.82618708 0.740855802 0.996871932 1.123423657 1  
 0.904187808 0.733921056 0.566858667 0.757186577 1 1.102347942  
 0.843388985 0.793069397 1.011502825 1 0.997247792 0.99963754  
 1.207311806 0.919953604 0.831748812 1 0.982523119 1.281138336  
 1.23207942 1.37002806 0.793901221 1 0.897408328 1.14238427  
 1.011976253 0.90884703 1.040416123 1.506948866  
 YJL131C YJL131C::YJL131C::molecular\_function unknown 1 0.720825554  
 1.292669932 1.156775557 1.434968571 1 0.913040347 1.089697566  
 1.337202432 1 0.878217266 1.276241491 1.861711467 1.203123221 1  
 1.076195766 0.571372637 1.11573645 1.881201321 1 1.867701865  
 4.424059066 4.23536081 1.830245116 1 1.086707048 1.604901844  
 0.99232155 0.937161584 1.123423527 1 1.344842391 1.429932277  
 1.373709904 2.177070288 1 1.547711624 1.347438891 1.291658885  
 1.103828332 2.115106889 1.39574464  
 YPL129W YPL129W::TAF14::Protein required for actin cytoskeleton assembly or  
 function 1 1.12323919 1.405187467 1.184741875 1.469914753 1  
 1.022670613 1.162316326 1.767403226 1.592465742 1 1.033030632  
 1.145014992 1.448210703 1.386590622 1 1.069370008 0.858278469  
 0.92821669 1.199329302 1 1.601038574 1.461839337 1.614482352  
 1.663511048 1 0.966159561 0.991758935 0.717280348 0.634718974  
 0.902661604 1 1.005790189 1.481466925 1.173943731 0.935914306  
 1.675645858 1 1.333304924 1.424931355 1.118232446 1.371232987  
 1.223935515 1.312560335  
 YJL133W YJL133W::MRS3::mitochondrial carrier protein 1 0.938365608  
 0.77885695 0.792976539 0.630103705 1 0.798396339 0.855294755  
 0.86745976 0.78378766 1 0.870254818 0.762650821 0.839808251  
 0.808714043 1 0.898133939 0.560086385 1.024286355 1.271855109 1  
 1.367117279 1.576382417 0.897108959 1.175498797 1.094356799  
 1.122472127 1.404885196 1.053516025 1 0.776538783 0.752814788  
 0.721964207 1.000787303 1 0.951149369 0.92080765 0.949103093  
 0.688810213 0.772642447 0.979823219  
 YPL131W YPL131W::RPL5::Homology to rat ribosomal protein L5; required for  
 assembly of stable 60S ribosomal subunits 1 1.669712986 1.348952893  
 1.166574436 1.290992758 1 1.530211443 1.465129675 1.158157363  
 1.545733261 1 1.195942031 1.06279392 0.815512923 1.039670309 1  
 0.572514636 0.236029721 0.132041805 0.302435445 1 0.885824438  
 0.539090522 0.190627064 0.655472785 1 1.009883663 0.802804822  
 0.81861426 0.866529293 0.828563736 1 1.292819642 1.371112413  
 0.82541289 0.687614805 1.010354378 1 1.096341752 0.882495843  
 0.88238921 1.155546462 0.882747101 1.043743836  
 YJL147C YJL147C::YJL147C::molecular\_function unknown 1 1.221648968  
 0.978125607 1.247377816 1.268496571 1 1.156428056 1.038277016  
 1.203422748 1.238501448 1 0.89863383 1.076848247 0.846491176  
 1.217781662 0.653097675  
 1 1.056606348 1.046457157 1.000444583 1.029672485 1.104085455 1  
 0.914934781 0.820090958 0.745215342 2.305812662 1 0.799173312  
 0.758316439 0.983435805 0.626187907 1.406985023 0.967564537  
 YPL145C YPL145C::KES1::Homologous to human oxysterol-binding protein;  
 implicated in ergosterol biosynthesis and regulation of Golgi-derived transport  
 vesicle biogenesis 1 1.407127579 0.908677652 1.195622261 0.930372779 1  
 1.373160371 1.401311131 0.872420399 0.888163899 1 1.54987189  
 1.113852305 0.696151913 0.985432014 1 0.903428069 0.640488375  
 0.609716744 0.437877386 1 0.676961634 0.383628513 0.339149141

0.630727017 1 0.886511041 0.835216183 1.129015029 1.107548373  
0.797742212 1 0.833483375 0.683351572 0.634542167 0.60419525  
0.439366707 1 0.904099307 0.702745112 0.792035039 0.699007408  
0.765447026 0.689116088  
YJL149W YJL149W::YJL149W::molecular\_function unknown 1 0.911829465  
0.823094067 0.815480918 0.950441763 1 0.885269435 0.917267721  
0.862128422 0.850280507 1 1.356741414 1.253663671 0.95181017  
1.145686155 1 1.313512478 0.480042252 1.091788943 1.043652168 1  
1.297874267 1.704975904 0.96755808 1 1.895871212 1.740499765  
1.420242323 0.96668637 1 1.765092954 1.707812579 2.110511884  
1.156042092 1.014147591 1 1.960157101 1.68811304 1.015549314  
0.704179724 1.029921779 1.102410567  
YPL147W YPL147W::PXA1::Pxa1p and Pxa2p appear to be subunits of a  
peroxisomal ATP-binding cassette transporter necessary for transport of long-  
chain fatty acids into peroxisomes 1 1.26286552 1.300992114 1.132743475  
1.305523337 1 1.186342647 1.352868102 1.149657102 1.241018517 1  
1.173068825 1.187758873 1.412560152 1.067973571 1 1.126306603  
1.174955401 1.595346243 1.42749897 1 1.074876324 1.177783083  
1.543430009 1.376111233 1 0.779979202 0.818732522 0.749631011  
0.731369882 0.863007716 1 0.702515598 0.669418886 0.720989049  
0.630485466 1 0.937488314 0.916961759 1.113361836 1.038967236  
1.245134577 1.06738564  
YJL151C YJL151C::SNA3::Homology to PMP3/SNA1 (Sensitivity to Na+) 1  
1.47455299 1.519222913 0.896983921 1.565676204 1 1.096327769  
1.06323846 1.507334639 1.531227364 1 1.234712344 1.266690678  
2.202739735 1.284779795 1 1.344109771 0.942190183 1.409592183  
1.692751734 1 1.987351738 2.792041415 3.006655521 1.81952419 1  
1.22065825 1.170654317 0.980264717 1.058406715 0.87472118 1  
0.979089224 1.309285113 1.040725091 1.014580101 1.796313603 1  
1.21073503 1.479522739 1.404951813 2.067081049 1.51061231 1.383485958  
YPL149W YPL149W::APG5::Involved in autophagy 1 1.346389296  
1.105321763 1.072765591 1.483365901 1 1.178498351 1.1105588  
1.948356508 1 0.978228868 0.970475231 1.320235402 1.491599212 1  
0.885756867 0.846453315 0.814110926 1.3367577 1 1.578398551  
1.943353549 1 1.030859157 1.154036084 1.037430425 0.962132459  
0.997207234 1 0.98757224 1.316662398 0.781990286 1.137477221 1  
0.914620014 1.117813343 1.136270733 1.089974669 1.466670158  
YJL153C YJL153C::INO1::involved in the rate limiting step of inositol  
biosynthesis 1 0.887927974 1.136581258 1.762096972 0.779044107 1  
1.352652342 1.750785863 1.151567414 1 0.622678238 0.760213288  
0.993229403 0.459657173 1 1.439416879 1.524642448 1.420684661  
2.011375927 1 1.21694934 1.040126219 0.96535865 2.162280445 1  
1.071246009 1.116618567 1.602146224 1.479187153 1.209651096 1  
0.8831493 0.715158736 1 0.640305122 0.576394869  
0.732021686  
YPL151C "YPL151C::PRP46::protein required for pre-mRNA splicing in vivo, WD-  
protein homologous to Arabidopsis thaliana pleiotropic regulators PRL1 and PRL2"  
1 0.95844402 1.069005108 1.058186068 0.902042027 1 1.002868474  
1.115309786 1.070309862 1 0.995175863 0.945160954 1.130577647  
0.980990795 1 0.73708558 1.03386899 1.178375187 1  
1.408467288 2.297397339 1.550218506 1.278902056 1 0.997262668  
1.094945828 1.176053137 0.904116863 1.026031245 1 1.138926949  
1.029662462 1.058194179 0.90049985 1.150676439 1 1.118402253  
0.949283955 1.123261568 0.831155153 1.098008577  
YPL153C "YPL153C::RAD53::Required for DNA damage-induced checkpoint arrest in  
G1, S/M, and G2/M in mitosis, dispensable for sporulation but required for wild-  
type spore viability; Mec1p and Tel1p regulate rad53p phosphorylation" 1

|             |                                                                                                                         |             |             |             |             |             |             |   |
|-------------|-------------------------------------------------------------------------------------------------------------------------|-------------|-------------|-------------|-------------|-------------|-------------|---|
| 0.952254585 | 1.007576993                                                                                                             | 1.425737568 | 0.892643447 | 1           | 1.134211551 |             |             |   |
| 1.100993299 | 0.987477796                                                                                                             | 1.005958323 | 1           | 0.882216302 | 0.827927469 |             |             |   |
| 0.644664973 | 1.38892457                                                                                                              | 1           |             | 0.877414913 | 0.89458853  |             |             |   |
| 0.60071014  |                                                                                                                         |             | 1           | 0.854128682 | 1.308684126 | 1.458019792 |             |   |
| 1.013051506 | 1.12718292                                                                                                              | 1           | 1.595717525 | 1.118051485 | 1.967830018 |             |             |   |
| 1.469898618 | 0.668872461                                                                                                             | 1           | 1.182493161 | 1.127429519 | 1.038833374 |             |             |   |
| 0.677505178 | 0.820329334                                                                                                             | 0.921156488 |             |             |             |             |             |   |
| YPL155C     | YPL155C::KIP2::kinesin-related protein                                                                                  | 1           |             | 0.947895559 |             |             |             |   |
| 0.79631221  | 1.028067301                                                                                                             | 0.730613391 | 1           | 1.057226072 | 1.096668959 |             |             |   |
| 0.803992947 | 0.843472945                                                                                                             | 1           | 1.102425886 | 0.744047507 | 0.779793268 |             |             |   |
| 0.811260712 | 1                                                                                                                       | 1.527994453 | 1.175974334 | 1.321349054 | 0.78177324  | 1           |             |   |
| 1.446199292 | 0.860662335                                                                                                             | 0.696101177 | 0.701366835 | 1           | 1.199261354 |             |             |   |
| 0.731822785 | 1.284032012                                                                                                             | 1.619518794 | 1.255050922 | 1           | 0.826737564 |             |             |   |
| 0.465577799 | 0.649645969                                                                                                             | 0.533437174 | 0.387145551 | 1           | 1.918494373 |             |             |   |
| 0.677745226 | 0.821925535                                                                                                             | 0.841857997 | 1.424306969 | 0.90276836  |             |             |             |   |
| YOR071C     | YOR071C::YOR071C::not yet annotated                                                                                     | 1           |             | 1.085669146 | 0.727132929 |             |             |   |
| 1.158892763 | 0.721368938                                                                                                             | 1           | 1.074037728 | 1.088314634 | 0.636275051 |             |             |   |
| 0.859811876 | 1                                                                                                                       | 1.054423073 | 0.858848606 | 0.513092919 | 0.956883975 |             |             |   |
| 1.085214864 | 1.205014725                                                                                                             | 1           | 0.575953644 | 0.864221823 |             |             |             |   |
| 1           | 0.91667088                                                                                                              | 0.848347467 | 0.980352637 | 1.147018883 | 0.996327782 | 1           |             |   |
| 0.814432639 | 0.557057571                                                                                                             | 1.389608275 | 0.989448322 | 0.483051348 | 1           |             |             |   |
| 0.892447515 | 0.756986702                                                                                                             | 1.080970229 | 1.128374863 | 0.713847378 | 0.762668497 |             |             |   |
| YPL169C     | "YPL169C::MEX67::Involved in nuclear mRNA export, binds both poly(A)"                                                   | 1           |             | 0.855626951 | 0.949862446 | 1.061405724 | 0.911438346 | 1 |
| 1.019137486 | 1.060566769                                                                                                             | 1.084788208 | 0.893114126 | 1           | 0.913015951 |             |             |   |
| 0.933993662 | 0.667354882                                                                                                             | 1.027033489 | 1           | 1.043991789 | 0.760841881 |             |             |   |
| 0.57399203  | 1                                                                                                                       | 0.670623147 | 0.767339587 | 0.64786414  | 0.601297877 | 1           |             |   |
| 0.915778268 | 1.004976633                                                                                                             | 1.025543448 | 1.1007827   | 0.862126258 | 1           |             |             |   |
| 1.025739113 | 0.687767408                                                                                                             | 0.893189148 | 0.854255799 | 0.762142741 | 1           |             |             |   |
| 1.086289652 | 1.00943875                                                                                                              | 1.239468883 | 0.924280373 | 1.061783187 | 0.832718402 |             |             |   |
| YOR073W     | YOR073W::YOR073W::molecular_function unknown                                                                            | 1           |             | 0.630338595 |             |             |             |   |
| 0.793052154 | 0.818220711                                                                                                             | 1.057612344 | 1           | 0.749245435 |             |             |             |   |
| 0.777950839 | 1                                                                                                                       | 0.583621701 | 0.577315467 | 0.691482968 | 0.795989378 | 1           |             |   |
| 0.545794969 | 0.455243721                                                                                                             | 0.56539872  | 0.776499835 | 1           | 0.865498994 |             |             |   |
| 1.268396377 | 1.317831775                                                                                                             | 1.160811982 | 1           | 1.038020029 | 1.094482407 |             |             |   |
| 0.989267498 | 0.892733918                                                                                                             | 1.369934364 | 1           | 0.856950966 | 1.007235851 |             |             |   |
| 0.930638582 | 0.860934948                                                                                                             | 1.02037585  | 0.968677046 | 1.339554837 |             |             |             |   |
| 1.017611096 | 0.937793286                                                                                                             |             |             |             |             |             |             |   |
| YOR075W     | YOR075W::UFE1::t-SNARE that resides on the endoplasmic reticulum and mediates retrograde traffic from the Golgi complex | 1           |             | 1.001612848 |             |             |             |   |
| 1.092181011 | 1.278625681                                                                                                             | 1.206507396 | 1           | 1.127509267 | 1.026547214 |             |             |   |
| 1.067522061 | 0.899131296                                                                                                             | 1           | 1.236647639 | 1.348225077 | 0.642817904 |             |             |   |
| 1.235906661 | 1                                                                                                                       | 0.956021185 | 1.133180596 | 0.898027767 | 0.720172791 | 1           |             |   |
| 0.363054969 | 0.251005858                                                                                                             | 0.325336476 | 0.525844897 | 1           | 1.076784331 |             |             |   |
| 0.894892805 | 0.845109013                                                                                                             | 1.033377573 | 0.848592158 | 1           | 1.183872866 |             |             |   |
| 1.371827773 | 1.938630559                                                                                                             | 2.243998122 | 1.574083855 | 1           | 1.308114307 |             |             |   |
| 1.671738709 | 1.940085751                                                                                                             | 1.630589401 | 1.298452206 | 0.67072796  |             |             |             |   |
| YOR077W     | YOR077W::RTS2::similar to mouse KIN7 protein                                                                            |             |             | 0.919771363 |             |             |             |   |
| 1.001021031 | 1.147217822                                                                                                             | 1.163994151 |             | 1.024275907 | 0.968772956 |             |             |   |
| 1.075474532 |                                                                                                                         | 0.931953538 | 0.887424549 | 0.768916419 | 1.074929971 | 1           |             |   |
| 0.697236756 |                                                                                                                         | 1.032080897 | 1           | 1.188726975 |             | 1           |             |   |
| 1.015177382 | 0.854992809                                                                                                             | 1.137841193 | 1.187000494 | 1           | 0.931850815 |             |             |   |
| 0.960465136 | 1.192004488                                                                                                             | 1.298099921 | 0.777341072 | 1           | 0.949762438 |             |             |   |
| 0.771516698 | 0.906674705                                                                                                             | 0.857708258 | 1.12642389  | 0.761792884 |             |             |             |   |
| YOR079C     | YOR079C::ATX2::Multi-copy suppressor of SOD-linked defects                                                              | 1           |             |             |             |             |             |   |
| 1.375621263 | 1.240747795                                                                                                             | 0.997705328 | 1.449604458 | 1           | 1.193896384 |             |             |   |
| 1.215196661 | 1                                                                                                                       | 1.321253627 | 1.035119452 | 0.945525697 | 0.873537571 | 1           |             |   |



|             |                                                                                      |             |             |             |             |
|-------------|--------------------------------------------------------------------------------------|-------------|-------------|-------------|-------------|
| 1.186610069 | 0.867917036                                                                          | 0.795842543 | 0.796464329 | 1           | 0.693556144 |
| 0.668677587 | 0.873164579                                                                          | 0.872041306 | 1           | 1.484040597 | 1.325511844 |
| 1.336430446 | 1.138010684                                                                          | 1.201364223 | 1           | 1.24967824  | 1.427892967 |
| 1.686239403 | 0.94160425                                                                           | 0.802741675 | 1           | 1.450842248 | 1.326296594 |
| 0.978247397 | 1.257438178                                                                          | 0.86568708  | 1.302052878 |             |             |
| YOR081C     | YOR081C::YOR081C::molecular_function                                                 | unknown     | 1           | 0.881549994 |             |
| 0.755394138 | 0.882954886                                                                          | 0.574635667 | 1           | 1.085662819 | 1.01094239  |
| 0.517329005 | 0.610962028                                                                          | 1           | 1.062052435 | 0.893703118 | 0.509573863 |
| 0.999834934 | 1                                                                                    | 1.119594853 | 0.708777834 | 0.8297743   |             |
| 0.683366043 |                                                                                      | 0.55730933  | 0.66858742  | 1           | 0.780551972 |
| 0.741304476 | 0.825745172                                                                          | 0.82602157  | 1           | 0.819269486 | 0.54321013  |
| 0.947879053 | 0.891057484                                                                          | 0.427614648 | 1           | 0.867864813 | 0.773634456 |
| 1.019374656 | 0.805313668                                                                          | 0.716130688 | 0.621693021 |             |             |
| YDL074c     | YDL074c::BRE1::putative coiled-coil protein with RING-finger and myosin-like domains | 1           | 0.619896528 | 0.760982061 | 0.847945833 |
|             |                                                                                      |             |             | 0.995382539 | 1           |
| 0.790278556 | 0.784233284                                                                          | 0.9087034   | 0.818346355 | 1           | 0.684232484 |
| 0.676997775 | 0.659905109                                                                          | 0.823068582 | 1           | 0.90183713  | 0.683290274 |
| 0.573387148 | 0.922215332                                                                          | 1           | 1.199080319 | 0.895326065 | 1.015959525 |
| 1.022552423 | 1                                                                                    | 0.951964057 | 1.075995517 | 0.867220494 | 0.983352289 |
| 1.250650737 | 1                                                                                    | 1.129989251 | 0.962394695 | 1.177297879 | 0.885961199 |
| 0.907478836 | 1                                                                                    | 0.979979482 | 0.876310234 | 0.825327489 | 1.121174317 |
| 1.001081289 | 0.853733421                                                                          |             |             |             |             |
| YOR095C     | YOR095C::RKI1::Ribose-5-phosphate ketol-isomerase                                    | 1           |             |             |             |
| 1.433863367 | 1.042732238                                                                          | 1.059064574 | 1.410156842 | 1           | 1.036306192 |
| 0.936434107 |                                                                                      | 1.409385209 | 1           | 0.597441464 | 0.445521864 |
|             |                                                                                      |             |             | 0.367185389 |             |
| 1.036414749 | 1                                                                                    | 0.36480233  | 0.187797201 | 0.144356689 | 0.545715642 |
| 1           |                                                                                      |             |             |             | 1           |
| 0.443183671 | 0.230617543                                                                          | 0.208667895 | 0.546453541 | 1           | 1.104487011 |
| 0.911712135 | 0.926212489                                                                          | 0.995743456 | 1.030676663 | 1           | 0.899123799 |
| 0.825405356 | 0.69622743                                                                           | 0.8171698   | 1.010777559 |             | 1.179454474 |
| 1.041434817 | 0.986385665                                                                          | 1.717219803 | 0.444690152 | 1.017475036 |             |
| YDL076c     | YDL076c::RXT3::Hypothetical ORF                                                      | 1           | 0.761850653 | 0.909114925 |             |
| 0.894497644 | 0.751799092                                                                          | 1           | 0.989994557 | 0.804185633 | 0.830351608 |
| 1           |                                                                                      |             |             |             | 1           |
| 0.823216867 | 0.945126195                                                                          | 1.028414594 | 0.875603856 | 1           | 1.461657996 |
| 1.195681456 | 1.621883712                                                                          | 1.470958268 | 1           | 1.116680959 | 1.599646322 |
| 1.87590379  | 0.894677836                                                                          |             | 0.780500039 | 0.920107696 |             |
| 1.020025537 | 1                                                                                    | 0.650004367 |             |             |             |
| 1.082313245 | 0.863234404                                                                          | 1.042868171 |             |             |             |
| YOR097C     | YOR097C::YOR097C::molecular_function                                                 | unknown     | 1           | 1.050599269 |             |
| 1.498831134 | 1.060068227                                                                          | 1.772982647 | 1           | 1.120833325 | 1.010703445 |
| 1.533252891 | 1.509795911                                                                          | 1           | 1.22873586  | 1.508590974 | 1.989277087 |
| 1.442710532 | 1                                                                                    | 1.333534929 | 1.092534305 | 1.136820425 | 1.880066484 |
| 1           |                                                                                      |             |             |             | 1           |
| 1.63240146  | 2.381799712                                                                          | 3.059659179 | 1.19999195  | 1           | 1.006864227 |
| 1.351047403 | 0.840321106                                                                          | 0.790782438 | 1.144436795 | 1           | 1.207678319 |
| 1.306933747 | 2.33546291                                                                           | 1.486843661 | 1.176643823 | 1           | 0.833912949 |
| 0.875376115 | 0.963404169                                                                          | 0.952442208 | 0.756191309 | 1.393993415 |             |
| YOR099W     | YOR099W::KTR1::mannosyltransferase involved in O- and N-linked glycosylation         | 1           | 1.186416483 | 0.799579196 | 1.107355041 |
|             |                                                                                      |             |             |             | 1.017454597 |
| 1.052518599 | 1.022839574                                                                          | 0.89601231  | 1.074829538 | 1           | 0.970122313 |
| 0.774883188 | 0.807510978                                                                          | 1.124197273 | 1           | 0.916002779 | 1.031624766 |
| 1.073503155 | 1                                                                                    | 0.529540244 | 0.406711193 | 0.419437354 | 0.611169447 |
| 1           |                                                                                      |             |             |             | 1           |
| 1.17460358  | 1.165362441                                                                          | 1.343257921 | 1.880171857 | 1.348722836 | 1           |
| 1.104121123 | 1.003565742                                                                          | 0.911899254 | 0.872743084 | 0.600639442 | 1           |
| 1.038608114 | 0.707991585                                                                          | 0.878495142 | 0.899442598 | 0.668990465 | 0.744280421 |
| YDL078C     | YDL078C::MDH3::malate dehydrogenase                                                  | 1           | 1.48907455  | 1.467750578 |             |
| 1.535765003 | 1.583083775                                                                          | 1           | 1.526963205 | 1.768595132 | 1.65045509  |
| 1.75102702  | 1                                                                                    | 1.143526531 | 1.624539813 | 1.986586459 | 1.422436647 |
| 1           |                                                                                      |             |             |             | 1           |
| 1.103683145 | 0.67724344                                                                           | 1.090770217 |             | 0.760201048 | 0.706714441 |

1 0.986794173 0.954992449 1.053177437 0.946046305 1.034433295 1  
1.092411366 0.899494957 1.343400073 0.934906344 0.62909323 1  
1.129577432 1.009458229 1.105176155 0.892285096 1.0863652 0.988579451  
YOR101W YOR101W::RAS1::ras proto-oncogene homolog 1 1.344674809  
1.131508972 1.168081994 1.257229297 1 1.132281887 1.040572857  
1.039323296 1.341071882 1 0.94130734 0.814244517 0.964949689  
1.104860413 1 0.713077442 0.827847265 0.906944572 0.82233801 1  
0.581768894 0.568912377 0.610077172 1 0.970685078 0.742019085  
1.039685193 0.983397451 0.907426915 1 0.835545765 0.995365275  
0.979531432 0.874755919 0.813677061 1 1.032245097 0.896816777  
0.867293291 1.264460103 0.636949233 1.076141872  
YDL080c YDL080c::THI3::Positive regulatory factor with thiamin  
pyrophosphate-binding motif for thiamin metabolism 1 0.743103981  
0.708581355 0.939525479 0.632755061 1 0.891920853 0.981082237  
0.842985237 0.837507558 1 0.885350165 0.864863101 0.674310709  
0.920944229 0.806930757 0.606518181 0.957556325 0.964084565 1  
1.244032016 1.254568035 1.000308065 0.914769503 1 1.047599342  
0.78486495 0.853537548 1.111200031 0.931448034  
1.065056367 1.120459072 0.56399377 1 0.83496343 0.634258431  
0.882471708 0.540747915 0.66637951 0.816957217  
YDL082w YDL082w::RPL13A::Homology to rat L13 1 1.161706684  
1.276953198 0.920759558 1.752645087 1 1.003725423 0.954530211  
1.245687795 1.341123837 1 0.884276807 0.814577193 0.754499353  
0.996558517 1 0.733417777 0.360515387 0.252630997 0.564483002 1  
1.187636679 0.824916115 0.603892536 0.824863976 0.979306674  
1.259001866 1.090824936  
0.871689702 0.904673894 1.14881872  
YDL084w YDL084w::SUB2::<u>Su</u>ppressor of the cold-sensitive snRNP  
biogenesis mutant <u>b</u>rr1-1 1 1.152164007 0.957610517 1.050712838  
1.465502579 1 1.085072844 1.097260126 1.06635937 1  
0.90419388 0.84969891 0.748226821 0.922850185 1 1.370698499  
0.988918149 0.982405536 1.062382132 1 0.882945759 0.708893327  
0.810773504 0.777584495 1 1.087990853 0.823561936 0.997901502  
1.129699317 1.012675936 1 1.154951739 0.781834446 1.235788157  
0.657077193 0.695115109 1 0.945197218 0.852617359 0.790329735  
1.114060592 0.826525266 1.060380634  
YDL098c YDL098c::SNU23::23 kD U4/U6.U5 snRNP associated protein 1  
1.041181337 1.354021045 1.186183788 1.566586897 1 1.07808875  
1.11737012 1.532922503 1.6080998 1 1.016397956 1.263015023  
1.402865239 1.308233426 1 0.868138692 1.127182639 1  
1.198776205 2.572957658 1.5456491  
1.606474384  
0.988579451  
YDL100c YDL100c::ARR4::provides low levels of resistance to arsenicals 1  
0.845341506 0.916270489 0.949002416 1.026691217 1 0.883587413  
0.91144602 0.918751743 1 0.850539404 0.983483488 1.018116879  
1.015245465 1 1.321960476 1.165806892 1.152327204 1.390993539 1  
1.060396826 1.413922169 1.145952026 1 1.387029224 1.362625874  
1.849982421 1.199967736 1.49367466 1 1.256552459 1.263769993  
2.194129288 0.900967853 0.506273723 1 1.167888061 1.054331325  
1.339847044 0.95483979 0.822187389 1.113793689  
YDL102W "YDL102W::CDC2::essential for mitotic and meiotic DNA synthesis,  
dispensable for meiotic spindle pole body duplication, but required for  
synaptonemal complexes and full intragenic recombination, spindle pole body  
separation and spindle formation" 1 0.734881484 0.780979773 1.114874421  
0.804255212 1 0.892637187 1.033468606 0.824914213 0.805233821 1  
0.774125178 0.646141784 0.485022032 1.128118941 1 0.729958625

|             |                                                           |             |             |             |             |             |             |  |   |
|-------------|-----------------------------------------------------------|-------------|-------------|-------------|-------------|-------------|-------------|--|---|
| 0.533730528 | 0.614416823                                               | 0.928466088 | 1           | 0.712083284 |             |             |             |  |   |
| 0.639623013 | 1                                                         | 1.19450835  | 1.051023956 | 1.33995486  | 1.263091036 |             |             |  |   |
| 1.251303597 | 1                                                         | 0.734102416 | 0.699685444 | 1.164191908 | 1.12966123  |             |             |  |   |
| 0.826911983 | 1                                                         | 0.739951771 | 0.629272966 | 0.915962257 | 0.645483507 |             |             |  |   |
| 0.565371047 | 0.679484244                                               |             |             |             |             |             |             |  |   |
| YDL104C     | YDL104C::QRI7::similar to H.influenzae sialoglycoprotease |             |             |             | 1           |             |             |  |   |
| 1.098631538 | 1.049883229                                               | 1.002099448 | 1.076636593 | 1           | 1.006114971 |             |             |  |   |
| 1.027799536 | 1.139025892                                               | 1.240209029 | 1           | 1.003071476 | 0.932264973 |             |             |  |   |
| 1.079617404 | 1.098907598                                               | 1           | 1.073241112 | 0.728629307 | 0.97058805  |             |             |  |   |
| 1.093231693 | 1                                                         | 1.367193965 | 2.118279657 | 1.223852696 | 0.653038305 | 1           |             |  |   |
| 0.953392997 | 0.969655406                                               | 0.897465904 | 0.98094226  | 1.009854444 | 1           |             |             |  |   |
| 0.850174152 | 0.941483763                                               | 1.249287618 | 0.882082064 | 0.797564216 | 1           |             |             |  |   |
| 0.964154494 | 0.824735017                                               | 1.056115196 | 0.936801628 | 0.968997835 | 0.87299711  |             |             |  |   |
| YJL155C     | "YJL155C::FBP26::fructose-2,6-bisphosphatase"             |             |             |             | 1           | 1.030136044 |             |  |   |
| 1.264032154 | 1.209522002                                               | 1.06902089  | 1           | 1.115472104 | 1.503853482 |             |             |  |   |
| 1.249638385 | 0.995273477                                               | 1           | 1.164923594 | 1.749484503 | 1.781383232 |             |             |  |   |
| 1.243657225 | 1                                                         | 2.173109131 | 2.439171944 | 2.234090124 | 1.54634748  | 1           |             |  |   |
| 3.055537504 | 2.289063103                                               | 2.703069993 | 1.920703305 |             | 0.801165247 |             |             |  |   |
| 1.016122679 | 0.887066249                                               | 0.626332557 | 0.943475793 | 1           | 1.680527825 |             |             |  |   |
| 1.488584941 | 1.50458447                                                | 1.058402015 | 1           | 1.713710926 | 1.316206541 |             |             |  |   |
| 1.162587351 | 1.55422755                                                | 1.164673727 | 1.267903512 |             |             |             |             |  |   |
| YJL157C     | YJL157C::FAR1::Factor arrest protein                      |             |             |             | 1           | 1.115332234 |             |  |   |
| 1.065250185 | 1.080205919                                               | 0.923233449 | 1           | 1.180255478 | 1.089986333 |             |             |  |   |
| 1.088453863 | 1.049057646                                               | 1           | 0.637824717 | 0.859632485 | 0.68989251  |             |             |  |   |
| 0.843901936 | 0.845090121                                               |             |             | 1           | 0.380561141 |             |             |  |   |
| 0.352359175 | 1                                                         | 0.79547473  | 0.851442293 | 0.800450369 | 0.941315174 |             |             |  |   |
| 0.953541354 | 1                                                         | 0.838634101 | 0.564159537 | 0.554111264 | 0.717111321 |             |             |  | 1 |
| 0.558422494 | 0.900334673                                               | 0.506023409 | 0.827120684 | 0.650588607 |             |             |             |  |   |
| YJL171C     | YJL171C::YJL171C::molecular_function unknown              |             |             |             | 1           | 1.948584286 |             |  |   |
| 1.356110873 | 1.407977309                                               | 1.359040887 | 1           | 1.628076544 | 1.41553319  |             |             |  |   |
| 1.413011033 | 1.438842079                                               | 1           | 1.966085435 | 1.588395841 | 1.476916441 |             |             |  |   |
| 1.427554779 | 1                                                         | 1.713423364 | 1.194022891 | 1.239372097 | 0.861781765 | 1           |             |  |   |
| 0.763511089 | 0.604147075                                               | 0.540238728 | 1           | 1.029378029 | 1.061031807 |             |             |  |   |
| 1.096862691 | 1.330181188                                               | 0.909127985 | 1           | 1.132138479 | 1.060760637 |             |             |  |   |
| 0.888307014 | 0.683854545                                               | 1           | 1.555098253 | 1.100840298 | 0.908322098 |             |             |  |   |
| 0.968344286 | 1.005771766                                               | 0.779305347 |             |             |             |             |             |  |   |
| YJL173C     | YJL173C::RFA3::subunit 3 of replication factor-A          |             |             |             | 1           |             |             |  |   |
| 1.311375266 | 1.648064651                                               | 1.091349453 | 1.945570236 | 1           | 1.038643783 |             |             |  |   |
| 1.083858542 | 1.872738655                                               | 2.034569074 | 1           | 1.160086865 | 1.298576975 |             |             |  |   |
| 1.976255356 | 1.406247865                                               | 1           | 1.043876656 | 0.58377873  | 0.565872911 |             |             |  |   |
| 1.197958356 | 1                                                         | 1.357024107 | 1.417455503 | 1.251154492 | 1.313807332 | 1           |             |  |   |
| 0.882824713 | 1.053328798                                               | 0.730941314 | 0.690289841 | 0.841213586 | 1           |             |             |  |   |
| 0.967354558 | 1.841440664                                               | 1.337138786 | 1.240114489 | 1.960864833 | 1           |             |             |  |   |
| 1.129824775 | 1.858298588                                               | 1.256692232 | 1.918602366 | 1.263820605 | 1.457913927 |             |             |  |   |
| YPL171C     | YPL171C::OYE3::Old yellow enzyme                          |             |             |             | 1           | 1.457503549 | 1.445416594 |  |   |
| 1.030483357 | 1                                                         | 1.164017072 | 1.200006241 | 1.409806841 | 1.080576104 | 1           |             |  |   |
| 8.558229002 | 10.64740292                                               | 4.191963579 | 1.259298639 | 1           | 31.31300625 |             |             |  |   |
| 49.51355172 | 49.79538988                                               | 14.32469193 | 1           | 35.06393916 | 38.68200109 |             |             |  |   |
| 30.02037006 | 13.32149264                                               | 1           | 1.181274058 | 2.358681102 | 2.013967255 |             |             |  |   |
| 1.015659815 | 0.916992622                                               | 1           | 3.823826848 | 7.462965467 | 10.24927923 |             |             |  |   |
| 7.689483822 |                                                           | 1.407845922 | 1.992992267 | 1.64849444  | 0.246638394 |             |             |  |   |
| 0.374104409 |                                                           |             |             |             |             |             |             |  |   |
| YJL175W     | YJL175W::YJL175W::molecular_function unknown              |             |             |             | 1           | 0.908984026 |             |  |   |
| 1.172987351 | 1.097128914                                               | 0.811146241 | 1           | 1.18042806  | 1.109669333 |             |             |  |   |
| 0.698566213 | 1                                                         | 1.144164033 | 1.24540286  | 0.520520537 | 1.363119461 |             |             |  |   |
| 1.496591365 | 0.970467223                                               | 1           | 0.806551308 | 0.900265079 |             |             |             |  |   |
| 0.743160604 | 1                                                         | 0.696060792 | 0.709887468 | 0.748075057 | 0.751633859 |             |             |  |   |

0.868967505 1 1.288631703 0.854497348 1.502542859 1  
 0.84500638 0.736175603 1.008755575 0.529904867 0.618830214 1.230251695  
 YPL173W YPL173W::MRPL40::Mitochondrial ribosomal protein MRPL40 (YmL40) 1  
 0.923287167 1.381209014 1.34569384 1.436821579 1 1.153416069  
 1.554926963 1.485011452 1.547381753 1 1.008610528 1.102203374  
 1.323738293 1.200423655 1 1.091019136 1.050947038 0.752199793  
 0.973705263 1 2.625850332 1.6539889 2.194048883 1.582074614 1  
 1.076347418 1.168763806 1.20618815 0.850868986 1.050581982 1  
 1.112437158 1.190463383 1.045095156 0.871694888 1.34474392 1  
 1.309122017 1.150046207 0.925572839 1.028952522 1.837784053 1.429018341  
 YJL177W "YJL177W::RPL17B::Homology to rat L17, human L17, and E. coli L22"  
 1 1.47879288 1.50610036 1.080573193 2.358346658 1 1.386468583  
 1.138169389 1.411833444 1.559031248 1 1.116292187 0.963089582  
 0.902459985 1.05820148 1 0.74301112 0.351720587 0.18617418  
 0.449519625 1 1.001635665 0.530687282 0.366899495 0.730607057 1  
 1.029113907 0.950742153 0.686966979 0.971753799 0.943620972 1  
 1.349160325 1.676609979 0.865709539 0.695402623 1.617648219 1  
 1.249510646 1.38827335 0.885865916 1.75238337 1.122357771 1.207485451  
 YPL175W YPL175W::SPT14::N-acetylglucosaminyl-phosphatidylinositol  
 biosynthetic protein 1 1.046578672 0.87290136 1.074132212 0.976869313 1  
 1.029103777 0.970071612 1.08223407 1.02449092 1 0.768882345  
 0.740516217 0.641803017 1.065518371 1 0.559911455 0.643004139  
 0.603556468 0.741997233 1 0.990441542 1.765087311 1.272342004 1  
 0.982494154 1.055265904 0.899732025 0.979377617 1.081948872 1  
 0.775035353 0.966283774 0.966526242 1.439442275 1 0.976477548  
 0.972396392 1.195556564 1.084383838 0.999087012  
 YJL179W "YJL179W::PFD1::Prefoldin subunit 1; putative homolog of subunit 1  
 of bovine prefoldin, a chaperone comprised of six subunits" 1 1.102174631  
 1.546946219 0.9734757 1.655261006 1 0.880873551 0.829065667  
 1.709562793 1.43153513 1 0.882093854 1.09667987 1.493419572  
 1.273816644 1 0.974437287 0.303197721 0.577328011 0.882212315 1  
 1.219062223 1.705510649 1.203482527 0.776179663 1 0.700925141  
 1.016760499 0.693174028 0.631510482 0.990549211 1 1.577069184  
 1.01607389 1.490182293 2.032737143 1 0.98482418 1.380134655  
 1.684860553 1.205734225  
 YPL177C YPL177C::CUP9::homeobox domain similar human proto-oncogene PBX1 1  
 1.256181203 1.398020533 1.150103137 1.589832342 1 1.32227844  
 1.168351872 1.36284855 1.672311189 1 1.730076056 1.641650107  
 1.962230798 2.315209966 1 1.248620208 0.632301662 0.738407376  
 1.452129908 1 1.208118974 1.454652887 2.270622377 1  
 1.277324244 1.201985343 1.129700922 1.223764537 1.1138309 1  
 1.133514131 1.231222772 1.029584128 1.44271251 1.646582518 1  
 1.43295862 1.177879162 1.263562865 1.397937143 1.66845761 1.716223073  
 YJL181W YJL181W::YJL181W::molecular\_function unknown 1 0.885444521  
 1.030656053 0.866948944 1.029806905 1 0.82015523 0.920352662  
 1.136656744 1.055054514 1 0.836382768 0.803789606 1.012011606  
 0.92773292 1 0.976099445 0.536151094 0.581338857 0.928276359 1  
 1.602491813 1.924054669 1.180482375 0.872206915  
 0.899190126 0.903625242 0.956872 0.950947375 0.877475765  
 0.868919422 0.725111589 1 0.960754728 0.706518845  
 0.917440646 1.113553184 0.727643518  
 YPL179W YPL179W::PPQ1::May play role in regulation of translation 1  
 1.775419426 1.715068027 2.112085536 1.761358993 1 1.699220979  
 2.02899926 1.490203654 1.776653031 1 1.688205773 1.59970778  
 1.4565722 1.446131893 1 0.834842455  
 0.324802609 0.514214371 1 1.109647971 0.910922056  
 1.098814193 1.022838175 1.051085264 1 0.94883484 0.97932996

0.793311238 0.847859368 0.838020059 1 1.005853892 0.974907128  
 1.047646367 0.952582609 0.980373512 1.841437207  
 YPL179W YPL179W::PPQ1::May play role in regulation of translation 1  
 0.902842472 0.717191201 0.776242861 0.626364601 1 0.87917629  
 0.911909053 0.640121424 0.60665497 1 0.993821884 0.755557285  
 0.566628081 0.661111786 1 0.725960768 0.583051606 0.54089459 1  
 0.63793842 0.520087711 0.464303286 0.536208016 1 0.882504152  
 0.83178756 0.990226619 0.936120922 0.6577992 1 0.726875032  
 0.677758922 0.773734627 0.90946589 0.448191196 1 0.667568121  
 0.643645424 0.738262825 0.649781837 0.42383804 0.640956762  
 YJL195C YJL195C::YJL195C::molecular\_function unknown 1 1.302066508  
 1.281323672 1.447836205 1.002711293 1 1.307627887 1.364885729  
 1.218729139 1.098492743 1 0.950121208 1.070815604 0.963904991  
 1.147971031 1 1.106890532 0.37486177  
 1 1.143391807 1.046295181 1.197742557 1.153498108 1  
 0.764397158 0.997535765 0.645271763 1.035069484 0.868030859 1  
 0.891886607 0.8658139 0.711555786 0.985421151 0.809168002 0.818708442  
 YPL193W YPL193W::RSA1::RiboSome Assembly 1 0.810862599 0.720363306  
 1.031864173 1.101077817 1 0.916922043 0.775685017 1.074631471  
 0.964120119 1 0.608012002 0.548081382 0.584256381 1.105341834 1  
 0.412374532 0.393152194 1 1.353411304  
 0.911867567 1.032689903 0.725414063 1.217761121 1.412343025 1  
 0.6301294 1.069256992 1 0.678678272  
 1.155661942 0.727121787 0.767922225  
 YJL197W YJL197W::UBP12::ubiquitin carboxyl-terminal hydrolase 1  
 0.693029699 0.656226888 0.919701582 0.613255327 1 0.835414108  
 0.849047381 0.71738848 0.661728508 1 0.721354638 0.70647465  
 0.527902322 0.810483268 1 1.109932328 0.872419885  
 0.791633568 0.812945211 0.66029041 0.613143587 1 1.064008244  
 1.021288367 1.155473458 1.308073042 1.27186132 1 1.046054801  
 1.222158088 1.08953443 0.848529733 0.838851851 1 0.866909781  
 0.894108934 0.738880593 0.850486607 0.747446316 0.719762951  
 YPL195W "YPL195W::APL5::Delta-like subunit of the yeast AP-3 complex which  
 functions in transport of alkaline phosphatase to the vacuole via the alternate  
 pathway, suppressor of loss of casein kinase 1 function" 1 1.064884509  
 0.917098626 1.347506356 1.183944469 1 1.71828047 1.370406617  
 1.778986629 1.668850332 1 2.193081595 2.144464573 1.305547948  
 1.304725151 1 0.92255819 0.819606256 0.467388666 0.441997773 1  
 1.141494537 0.693185184 0.557649501 0.959457361 1 0.998879235  
 1.232648718 1.17089267 1.080999191 1.229938248 1 0.884806957  
 1.221895374 1.257617135 1.566481813 1.10044012 1 1.095583608  
 1.010504598 1.199479128 0.925120928 1.212610541 1.532342  
 YPL197C YPL197C::YPL197C::molecular\_function unknown 1 1.388962476  
 1.222955981 0.895182972 1.687732482 1 1.049471716 0.915063268  
 1.37342236 1.351450878 1 0.944903394 0.799688373 0.977754188  
 0.865098436 0.452327977 0.248512529 0.162461799 0.309442267 1  
 1.319631951 1.610486935 0.595316419 0.96337677 1 1.061036156  
 0.844702681 0.886987406 0.99408909 0.920100894 1 1.189094881  
 1.600775308 0.901932484 0.729138218 1.702049594 1 1.10204765  
 1.709027017 1.090937497 1.769831345 1.211326205 1.274908518  
 YPL199C YPL199C::YPL199C::molecular\_function unknown 1 0.817914608  
 1.09449571 0.883859134 1.371769655 1 0.793257264 0.819446568  
 1.159714786 1.169539284 1 0.71810763 0.84463438 0.915456605  
 0.89937746 1 0.971188463 0.625124434 0.51031461 0.764700084 1  
 1.822709071 1.523083149 1.425932781 1.378449768 1 1.014119198  
 1.272509974 0.900508039 0.823893325 0.978158378 1 1.18616662

1.469289508 1.125637238 0.954221153 1.637002213 1 1.101191118  
1.348686488 1.056314798 1.407847984 1.251879305 1.105037457  
YOR103C YOR103C::OST2::Oligosaccharyltransferase catalyzes the transfer of  
oligosaccharide from dolichol-oligosaccharide donor to consensus glycosylation  
acceptor sites (asparagines) in newly synthesized proteins in ER lumen 1  
1.590352446 1.59504588 1.106014664 2.019391737 1 1.243780318  
1.149318439 1.408087532 1.618917682 1 1.136701902 1.226379249  
1.655816907 1.179114071 1 0.897055891 0.663954481 0.611728915  
1.359012748 1 1.023693585 0.994296812 1.168707139 1.134305599 1  
1.121077336 1.193254432 1.010032772 1.14090545 1.247391166 1  
1.019091995 1.504556871 1.433576719 0.825748309 1.145060669 1  
1.174928842 1.252488018 0.849547681 1.455013379 0.829545196 1.846690988  
YPL201C YPL201C::YPL201C::molecular\_function unknown  
1.093988463 1.106632033  
0.63693636 0.500608826 1 1.224630877  
1 0.836438537 0.697058832 0.856824535 1  
0.894095768 0.373040578  
YOR105W YOR105W::YOR105W::molecular\_function unknown 1 1.246389817  
1.300959725 1.339902351 1.806176419 1 1.16099158 1.239046197  
1.486043716 1.662088311 1 1.054141804 1.026652124 1.2665235  
1.317083684 1 0.863391531 0.702446894 0.879885426 1.400785217 1  
1.053623424 1.509988884 2.135552245 1.418705988 1 1.290353041  
1.402281259 1.442068756 1.267256422 1.383675707 1 1.050160632  
1.146397721 0.883140298 0.845593002 1.485512326 1 0.881070346  
0.856976408 0.995531873 1.248557271 1.093547046 1.204858665  
YOR119C YOR119C::RIO1::Essential in yeast; plays a role in cell cycle  
progression. 1 1.061584711 0.789632053 0.962907225 1.064700697 1  
1.116060563 0.914801687 0.986854141 1 0.667792666 0.639318098  
0.659073431 0.962802003 1 0.955116333 1.143996998 1  
0.585766617 1 0.705709455 0.652086657 0.711289228  
0.84955529 1.010057953 1 0.881077229 0.945496968 0.936704259  
1.048230646 1.096801165 1 0.713056037 0.781158026 0.743335765  
1.293347188 0.46321795 0.823086558  
YOR121C YOR121C::YOR121C::molecular\_function unknown 1 1.419417142  
1.761051027 1.077743626 2.043029882 1 1.016607161 1.281576658  
1.627742488 1 1.280173413 1.74480355 4.202828859 1.335788651 1  
1.491111264 1.727109512 2.82482864 4.170952429 1 1.996697558  
4.943208911 6.837131659 2.538229137 1 0.738818746 0.647818037  
0.564992423 0.587597849 1.26921503 1 0.929163865 1.755035493  
2.688331393 1.727907258 2.515422077 1 1.278868148 1.740453675  
1.247979961 2.599162181 2.210883631 1.543725122  
YOR123C YOR123C::LEO1::member of the RNA polymerase II-associated Paf1  
complex 1 0.953025755 1.172576493 1.030869211 1.452894447 1  
1.074670816 1.064645242 1.23322986 1 1.047317711 1.007703981  
1.124375593 1.112286435 1 1.014783186 0.87665222 0.959319035  
1.857114794 1 1.346303154 2.065761228 1.307087224 1.211026467 1  
1.05205734 1.161722753 0.850509559 0.798602084 1.01888479 1  
1.083545093 1.308491635 1.466739301 1.421585202 1.133869865 1  
1.224618323 0.923442273 1.045407802 1.259240214 1.068364187 1.068261305  
YOR125C YOR125C::CAT5::may encode a protein involved in one or more  
monooxygenase or hydroxylase steps of ubiquinone biosynthesis 1  
0.992498678 1.515056709 1.312226427 1.172877195 1 1.30519082  
1.330743835 1.681763607 1 0.968865234 1.170043445 1.497371927  
1.29282966 1 1.200245108 0.989687676 0.859619058 1.858391417 1  
2.17279884 2.442282616 3.005090227 2.122007726 1 1.5457075  
1.597823598 1.501428092 1.272523476 1.588104777 1 1.223788619 1.28006

1.607898276 1.134329453 0.909342042 1 1.529179333 1.238097491  
1.192940423 1.399963764 1.542953051 1.005216354  
YOR127W YOR127W::RGA1::putative GTPase-activating protein for the polarity-  
establishment protein Cdc42p or Rho1p; activates the pheromone-response pathway  
1 0.915962475 0.972853914 1.168856419 0.940337616 1 1.146867725  
0.871075683 1 0.951084475 0.928431099 0.566002841 0.76328965 1  
0.55226409 1  
1.027771166 1.028839849 1.013352818 0.986648211 1.166551027 1  
1.10705546 0.709662901 1.211154617 1.234550128 0.485939483 1  
0.934242571 0.852222021 1.064598529 0.889333925 0.711507166 0.839723408  
YOR129C YOR129C::YOR129C::molecular\_function unknown 1 1.077051033  
1.027930587 1.140264581 1.057317039 1 1.149574411 1.113982111  
1.005261792 1.032670916 1 1.003111845 1.070427675 1.11523015 1  
1.019203338 0.901086068 1.373280056 1.450275059 1 0.77752196  
1.742613304 1.484915054 0.713061155 1 0.95045044 0.912154809  
0.876265086 1.22617418 0.894793595 1 0.870922144 0.744121312  
0.798800921 0.842992107 0.704010396 1 0.849644572 0.840387599  
1.077862257 1.055977602 0.733772912  
YOR143C YOR143C::THI80::Thiamin pyrophosphokinase 1 1.211144912  
1.220718255 1.193859415 1.710547249 1 1.257084529 1.214311437  
1.21604681 1.397577799 1 1.079481771 1.004844478 0.987347968  
1.142674419 1 0.57342657 0.499045168 1 1.02785928  
0.781228105 0.543430603 0.877290239 1 0.982206689 0.947144076  
0.680648632 0.73611165 1.071582591 1 0.874507181 1.012585416  
0.896202529 0.911165151 1.265430913 1 1.154951481 1.248208922  
1.74892143 1.320991377 0.988579451  
YOR145C YOR145C::YOR145C::molecular\_function unknown 1 0.834153342  
0.721766885 0.86116284 1.213861377 1 0.706904719 0.652079662  
0.966130182 1.396048567 1 0.430955219 0.361111448 0.349997974  
1.008808345 1 0.438698024 0.361478682 0.282070225 0.767495612 1  
0.489885113 0.292202824 0.335567224 0.862302641 1 0.79188587  
0.604877337 0.63695279 1.030602907 0.946924543 1 0.695791455  
0.749609489 0.587675942 0.987708746 1.687223295 1 0.481731633  
0.647944768 0.848338035 1.586591899 0.597736905 1.029733823  
YJL199C YJL199C::YJL199C::molecular\_function unknown 1 1.455684025  
1.401900385 1.343404817 1.756327292 1 1.044906078 1.181687404  
1.783797433 1.640613464 1 1.322015329 1.513082708 2.483304352  
1.614581073 1 1.600280313 1.358399541 1.542586062 1.47699303 1  
1.470728674 2.843551405 1.317086222 1.226048881 1 1.165945866  
1.43204196 1.171429647 1.370755712 1.293001067 1 0.966644517  
1.469417077 1.554747262 1.857975881 1.416571372 0.902203178  
1.047141321 1.25957067 0.724500298 1.064668211 0.691742979  
YJL201W YJL201W::ECM25::ExtraCellular Mutant 1 1.43766603  
1.216567155 1.551863115 1.372795209 1 1.467697485 1.309367681  
1.218956053 1.245127197 1 1.21851186 1.218252598 1.059916519  
1.592700521 1 1.24788918 0.348085927  
0.558520857 1 1.042976183 1.003213287 1.025502539 0.943843758  
0.975566067 1 1.006534873 0.942704097 0.989187967 0.837344439  
0.982419728 1 0.934850762 0.939279636 1.05849159 0.941154204  
0.994805652 0.956181415  
YJL203W YJL203W::PRP21::RNA splicing factor 1 0.904756082 1.302802248  
1.095897208 1.321821655 1 0.975066059 0.93465862 1.190757215  
1.22916493 1 1.021996404 1.27316466 1.301320207 1.159274023 1  
0.923037989 0.794853273 1.077615537 0.726440223  
0.708811379 0.849098204 1.084232353 0.686011374 0.894675322  
0.725980377 1.001612415 0.911653203 0.964352223 1 0.791468684  
1.15786133 0.97801749 1.027792931 0.977764976 1.020101927

YJL206C YJL206C::YJL206C::molecular\_function unknown 1 0.965477427  
1.088204696 1 1.004620693 1.065388837 2.112447474 1  
1.090800939 1.593232715 2.647925671 1.453898014 1 1.052128679  
0.927165629 1.104264504 1.443043867 1 1.6398878 3.363599046  
3.192076145 1.312185048 1 0.86435318 1.104938579 0.712907471  
0.641265912 1.093806525 1 0.968364185 2.899637986  
4.276672885 0.43292117 0.717591399 1.01662375 1.401126921  
YPL203W YPL203W::TPK2::Involved in nutrient control of cell growth and  
division 1 1.270833323 1.456870421 1.547349555 1.150007745 1  
1.640940568 1.600548445 1.297359422 1.214879859 1 1.902552219  
1.858743591 1.542535705 1.385355609 1 1.986262149 1.544726889  
1.442317238 1.051491226 1 2.105778555 1.358979051 1.623779782  
1.314732776 1 1.355074428 1.593389805 1.407209687 1.190567093  
1.065499582 1 1.477828074 1.132011808 1.477260674 0.924615182  
1.117228411 1 2.017419748 1.464488822 1.443984869 1.122114044  
1.980476814 1.017475036  
YJL219W YJL219W::HXT9::High-affinity hexose transporter 1 1.359514331  
0.956650416 1.496689183 0.87325023 1 1.385612499 1.230243519  
0.8727195 0.921238724 1 1.547297819 0.916569262 0.912230995  
0.810965948 1 2.244616261 1.906138462 1.532826759 1  
1.88234163 0.973803059 1.223078843 1.079395796 1 1.0608116  
0.829156151 1.143134222 1.38444655 1.094987681 1 0.998472025  
0.773846775 0.939481634 0.754987479 1 1.015787873 0.703075954  
0.975616581 1.105615538 2.327408585  
YPL217C YPL217C::BMS1::BMH1 sensitive 1 0.714752533 0.559934912  
0.89373748 0.582144487 1 0.783073473 0.736564894 0.77937303  
0.879520196 1 0.687445611 0.473771114 0.409863862 0.868824238 1  
0.510624998 1.041391976 0.403970822 1 0.55480291 0.395777215  
0.262921404 1 0.73146924 0.673886704 0.853412667 1.028324472  
0.891196481 1 0.89083918 0.618296087 0.610005266 1.136524511  
0.809506774 1 0.624822381 0.518519776 0.869459886 0.735144588  
0.521941956 0.676857354  
YJL221C YJL221C::FSP2::homology to maltase(alpha-D-glucosidase) 1  
1.105409985 1.129311391 1.426365171 0.945521578 1 1.311447589  
1.505562905 1.268826194 1.148709427 1 1.325735875 1.418790852  
1.400172882 1.094897285 1 1.47159974 1.465259775 1.189354017 1  
1.295340551 1.32099081 1.688125159 1.394035637 1 1.01135064  
0.952124607 0.915300369 1.296730032 1 1.014671588  
1.204592903 0.960718838 1 0.791858914 0.782582142 0.899789145  
0.701784747 0.92739731 1.085773768  
YPL219W YPL219W::PCL8::PHO85 cyclin 1 1.196082501 1.141339534  
1.156215234 1.306841722 1 1.156219403 1.047803502 1.251721965  
1.215050977 1 1.079547998 1.019872301 1.193952486 1.170149955 1  
0.917276243 0.771401011 0.934775983 1.027473488 1 1.200248812  
1.266897419 1.168695299 0.723171773 1 1.088003282 0.948463003  
0.961042766 1.239928153 0.976943997 1 0.779187134 0.919895457  
0.820469104 0.746369445 1.188954263 1 1.011084387 1.235241379  
1.208653127 1.619463673 1.544506084 1.131306256  
YJL223C YJL223C::PAU1::member of the seripauperin protein/gene family (see  
Gene\_class PAU) 1 1.778320825 1.92858201 1.377942761 1.888406357 1  
1.44451866 1.263060189 2.022841817 1.72385072 1 1.611145934  
1.567073759 2.65313647 1.523435231  
1 1.089966541 1.441091566 1.284163958 1.158906731  
1.118833459 1 0.907904567 1.764684626 1.37942608 1.266622464  
1.795833325 0.77607654 1.128458805 1.031221422 1.074418571  
1.045845379 1.524461433



YPL221W YPL221W::BOP1::bypass of PAM1 1 0.77706375 0.652031509  
1.002378168 0.571675309 1 0.900336188 0.919495301 1  
0.770956803 0.71336597 0.575768002 1.022783709 1 1.045406041  
0.999918861 0.981802217 0.770467996 1 1.00224191 0.652249811  
0.495407671 1.10371419 1 0.914760036 1.067178792 1.491865704  
1.371350765 1.017742242 1 0.687830797 0.585358599 1.158551969  
0.838847027 0.386838333 1 0.998335724 0.727474193 1.16528659  
0.594328975 1.007486479 0.666349844  
YJR001W YJR001W::YJR001W::not yet annotated 1 1.005545666 0.855552882  
0.880241443 0.544995678 1 1.026366169 1.076588165 0.878430046  
0.701924945 1 1.039786597 1.000414168 0.898917578 0.825113125 1  
0.96314744 1.324770553 1.094729667 0.567287609 1 0.896533699  
0.571333422 0.549022741 0.625746782 1 1.115618485 1.084562554  
1.091677147 1.201563214 0.905808424 1 0.762924214 0.872124396  
0.734782101 0.744252452 0.576968716 1 0.964082082 1.04526339  
1.004533312 0.845156312 0.958263102 0.812579049  
YPL223C YPL223C::GRE1::Induced by osmotic stress 0.666126278  
0.742509347 0.835255039 1.152246558 0.617471268 0.786441535  
1.328954968 2.395037219 0.624517384 0.784825997 0.878761602 1  
1.239360452 1.664245593 2.649021069 1 2.215690251 4.336907655  
3.653173469 2.123210586 1 1.010286484 1.264917411 1.113519707  
0.816189065 1 0.935091479 1.221388968 1.607662603 1.439652678  
1.518946976 1 1.132900111 1.208025142 1.417360842 0.253265491  
1.713144134 1.319565341  
YJR003C YJR003C::YJR003C::molecular\_function unknown 1 0.759122139  
0.717271711 0.758304377 0.772969823 1 0.765108139 0.673334944  
0.933849768 0.826393841 1 0.560857488 0.508350537 0.431453069 1  
0.634372281 0.614429131 0.512020368 0.734814718 1 0.661605788  
0.98580039 0.632571169 0.930015667 1 1.11898583 0.928338933  
1.139595431 1.095790675 1.192402627 1 0.723097526 0.773939965  
0.571995022 0.848019036 0.686311713 1 0.766066162 0.852461594  
0.88280215 0.910357301 0.562573896 0.949176408  
YPL225W YPL225W::YPL225W::molecular\_function unknown 1 1.743781877  
2.050282427 1.302710532 2.349306789 1 1.344134388 1.319094838  
1.965961444 1.903803554 1 1.5369581 1.946687776 1.741278637  
2.148926088 0.255894085 0.36473212 0.248929111 1  
1.84119166 2.4807957 1 1.059138069 1.210486625  
0.935818322 0.69174429 1.207977314 1 1.156650186 1.954793799  
1.575157157 1.270565393 2.181438473 1 1.351489828 1.620526546  
1.135282161 1.560593932 1.689883999 2.46313028  
YJR005W "YJR005W::APL1::beta-adaptin, large subunit of the clathrin-  
associated protein complex" 1 0.863818794 0.877715824 1.087172964  
0.866726313 1 0.966636034 1.056017856 0.963589717 0.737024506 1  
0.824376991 1.029462995 0.641997079 0.992499282 1 1.311468751  
0.930379791 0.958911946 0.62991511 0.956945305 0.963904765  
0.810521634 1 1.063813288 1.058629105 1.281018936 1.06971296  
1.189249568 1 1.159483006 1.010724831 1.122441781 0.98740293  
0.445843579 1 0.991982655 0.806041053 0.902543016 0.790854245  
0.765093218 0.891385238  
YPL227C YPL227C::ALG5::UDP-glucose:dolichyl-phosphate glucosyltransferase 1  
1.305794827 1.086341241 1.339683658 1 1.200559877 1.02310344  
1.182821246 1.149140779 1 0.982828982 0.97250374 1.07442237  
1.619689668 1  
0.973574784 0.917449293 0.76163798 1.018588741 1.072695971 1  
0.872985634 0.946415561 0.723511635 0.821371891 1.475238253 1  
1.155565202 1.039304431 1.079509138 1.411269069 1.368957503 1.132181817

YPL241C YPL241C::CIN2::involvement in microtubule function 1  
1.679932351 1.390545917 1.208124986 1.643287485 1 1.065671532  
1.212480286 1.557300987 1 1.134835175 1.046625294 2.443071154  
0.665153733 0.56099856  
1 0.891390733 0.93289845 1.213049607 1.111450732 1  
0.765805829 0.954280793 1.362794079 1.277839014 1 1.060315368  
1.266809262 0.598163391 1.122239633 1.072639421  
YPL243W YPL243W::SRP68::part of the signal recognition particle (SRP)  
ribonucleoprotein (RNP) complex that functions in protein targeting to the  
endoplasmic reticulum (ER) membrane 1 0.692335737 0.739217973 0.815176167  
0.783866944 1 0.877666758 0.678911495 0.793407704 1  
0.617263885 0.66106487 0.935678514 0.657733168 1 0.8795133  
0.526410351 0.741199703 1 1.036920962 0.720044189 1.305821375 1  
0.869590883 0.841897107 0.916889614 0.95568162 1.055811489 1  
0.998296102 0.830228459 0.920847837 0.836453509 1.07590528 1  
1.157453875 0.898551109 1.049383804 1.003434139 1.076820859 0.899265805  
YOR147W YOR147W::YOR147W::molecular\_function unknown 1 1.094123504  
1.048798412 1.1455181 1.113784627 1 0.99490454 1.069599023  
1.135942378 0.992770944 1 0.864602063 0.930763784 0.676717447  
1.123309122 1 0.694306939 0.512272051 0.474005339 0.707143436 1  
0.931112132 0.474615641 0.433970709 0.778816274 1 1.015092595  
0.963165654 0.797765744 0.954765688 0.949223823 1 1.017947661  
0.87867011 0.896648972 1.000774739 1.148344805 1 0.992476082  
0.947349829 1.047043204 1.524741085 1.160924594 1.146191829  
YPL245W YPL245W::YPL245W::molecular\_function unknown 1 1.025945768  
0.827216831 0.907569212 0.887276067 1 1.034915222 0.751518418  
0.889171855 0.867489765 1 0.812469368 0.542275713 0.708632207  
0.690175847 1 1  
0.788952391 0.576749892 0.80282725 0.972226067 0.782401022 1  
0.689553759 0.437374309 0.463703888 0.522687492 0.648296315 1  
0.659344288 0.379685215 0.719777378 0.608480954 0.565232046 0.892260903  
YOR149C "YOR149C::SMP3::Involved in glycosyl phosphatidyl inositol  
synthesis; most likely an alpha 1,2 mannosyltransferase utilized for addition of  
the fourth, side-branching mannose onto the GPI core structure." 1  
1.546829605 0.996920427 1.318167988 1.21682934 1 1.462445531  
1.342679006 0.93079288 0.930335587 1 1.545212554 1.159963687  
0.616037776 1 1.453814896 0.696009164 0.756123872 0.708025268 1  
1.202817089 0.735450035 1 1.159014082 1.067833211  
1.430273042 1.477979137 1.002061023 1 0.892045456 0.739811202  
0.895914299 0.945351934 0.596896943 0.824936388 0.847414036  
1.023922555 1.034339796 1.009376059 0.666349844  
YOR151C YOR151C::RPB2::second largest subunit of RNA polymerase II 1  
0.866802289 0.746832741 1.057451765 0.755534395 1 1.142041945  
1.097964535 0.700111335 0.602075426 1 0.881234087 0.973524501  
0.376967447 0.807518865 1 0.611663917 0.350909198 0.333813035  
0.585216102 1 0.958489173 0.458142648 0.75474674 1  
0.962083363 0.967675407 1.035904969 1.05723272 0.903839374 1  
1.017121995 0.672182334 0.833744702 0.769237039 0.499410379 1  
0.912253593 0.876423588 1.038666568 0.830460383 0.991771025 0.601553668  
YOR153W YOR153W::PDR5::multidrug resistance transporter 1 1.607284228  
1.397854194 1.688932748 1.497387694 1 1.655523261 1.543817346  
1.457825834 1.156401836 1 1.847915196 1.449662775 1.020036829  
1.301290757 1 1.174900718 0.790049473 0.852104859 0.850053082 1  
0.768688846 0.868712927 0.5881059 0.703621115 1 1.057800423  
0.842004826 0.755237743 1.058916184 0.841430411 1 1.078188881  
0.316914612 0.598086138 0.450080124 0.161719562 1 0.583890577  
0.329559395 0.400861546 0.319055426 0.36995464 0.62957364

|         |                                                      |                         |                         |             |
|---------|------------------------------------------------------|-------------------------|-------------------------|-------------|
| YOR167C | YOR167C::RPS28A::Homology to mammalian S28           | 1                       | 1.262514614             |             |
|         | 1.581908933 0.825871704 1.867840878 1                | 1.073104152             | 1.043066313             |             |
|         | 1.552667294 1.250454988 1                            | 0.962327351 1.003136257 | 1.098110964             |             |
|         | 0.850693139 1                                        | 1.039372714 0.29982132  | 0.330069039 0.851721417 | 1           |
|         | 1.115634053 1.411764623 0.89750989                   | 0.942429104 1           | 0.973560453             |             |
|         | 1.021037579 0.652255815 0.97262416                   | 1.138568709 1           | 1.08044689              |             |
|         | 1.592073846 1.010197971 0.724555555                  | 1.883990772 1           | 0.877483039             |             |
|         | 1.2618708 0.837642506 2.139926848                    | 1.134275098             | 1.439525903             |             |
| YOR169C | YOR169C::YOR169C::molecular_function unknown         | 1                       | 1.450107706             |             |
|         | 1.574267271 0.993041654 1.911500302                  | 1                       | 1.165649713             | 1.70882227  |
|         | 1.368319637 1                                        | 1.027288954 0.820930985 | 1.237864051             | 1.116429709 |
|         | 0.991004518 0.545196549 0.606239947                  | 1.218942773 1           | 0.935785841             |             |
|         | 1.417811508 1.131890782 0.956304939                  | 1                       | 0.829907075             | 0.658961762 |
|         | 0.50391933 0.605569161 0.712304179                   | 1                       | 1.170455073             | 1.128809108 |
|         | 0.885062434 0.780379922 1.463497211                  | 1                       | 0.880203828             | 1.283887073 |
|         | 0.639040514 1.945678095 0.70894392                   | 1.539347006             |                         |             |
| YOR171C | YOR171C::LCB4::involved in sphingolipid biosynthesis | 1                       |                         |             |
|         | 0.991157121 0.940167294 1.210851066                  | 0.993624544 1           | 1.081789476             |             |
|         | 0.901544662 0.901729545 1                            | 1.133083704 1.172631758 | 0.725348977             |             |
|         | 1.099458908 1                                        | 0.967043653 0.66284238  | 0.864063788             | 0.912985037 |
|         | 1.115360576 0.960588685 0.835053881                  | 0.877852465 1           | 0.966691196             |             |
|         | 0.91222922 0.921070939 0.83902933                    | 0.894899672 1           | 1.053494511             |             |
|         | 0.751836079 0.844045741 0.696033905                  | 0.616018909 1           | 1.21077201              |             |
|         | 0.80879162 0.910106203 0.661924082                   | 0.979513699             | 0.885255897             |             |
| YOR173W | YOR173W::HNT5                                        | 1                       | 1.036724327             | 1.943210847 |
|         | 1.482336237                                          | 1.789291237 1.89244819  | 1                       | 1.530040809 |
|         | 5.803667717 1.965163137 1                            | 4.057010606 3.735997935 | 5.859973179             |             |
|         | 6.231976558 1                                        | 4.55552388 3.974399893  | 7.363836017             | 4.107247002 |
|         |                                                      | 1                       | 1.168672021             | 1.268204268 |
|         | 1.770198274 1.470142651 1                            | 1.224875254             | 1.245764566             | 1.307790723 |
|         | 1.055535818 2.611291054 1.387864073                  |                         |                         |             |
| YOR175C | YOR175C::YOR175C::molecular_function unknown         | 1                       | 0.890370871             |             |
|         | 0.750982681 0.999686466 0.96794748                   | 1                       | 1.051010883             | 0.847644806 |
|         | 0.683897315 0.726740424 1                            | 0.9405141               | 0.753336983             | 0.464122326 |
|         | 0.922850178 1                                        | 1.259151038 0.92233529  | 0.735735529             | 1           |
|         | 0.821392276 0.518163389 0.509040443                  | 0.610177425 1           | 1.161703609             |             |
|         | 1.492688048 1.527832806 1.787329234                  | 1.389703853 1           | 1.019009586             |             |
|         | 1.23535967 2.136195548 0.810029824                   | 0.905322947 1           | 1.050854627             |             |
|         | 1.190654871 1.0287284                                | 0.761476983             | 0.790688469             |             |
| YOR177C | YOR177C::MPC54::Meiotic Plaque Component             | 1                       | 1.620625831             |             |
|         | 1.68394356 1.771766205 2.14813516                    | 1                       | 1.582514906             | 1.688315824 |
|         | 1.71491951 2.015330599 1                             | 0.321310084             | 1                       | 0.960627858 |
|         | 0.891940446 0.959985609 0.918352131                  | 0.979645773 1           | 0.641222489             |             |
|         | 0.713514395 1.050762525 0.87544734                   | 1                       | 0.803760661             | 0.850145072 |
|         | 1.151403126 1.221872946 1.365978985                  |                         |                         |             |
| YJR018W | YJR018W::YJR018W::molecular_function unknown         | 1                       | 1.415736139             |             |
|         | 1.369445568 0.881656222 0.712785377                  | 1                       | 1.104902397             | 1.385957062 |
|         | 1.040379222 0.960641676 1                            | 1.304149336             | 1.552797959             | 1           |
|         | 0.786530249 0.758918057 0.854037104                  | 1.153194167 1           | 1.597083539             |             |
|         | 0.940650962 1                                        | 1.06004177              | 1.118134782             | 1.853895614 |
|         | 1.397742698 1                                        | 0.729859645 0.957842309 | 0.809356789             | 1.232827055 |
|         | 0.825508317 1                                        | 0.682040285 0.619392584 | 1.005179771             | 0.709493016 |
|         | 0.735913255 0.901892695                              |                         |                         |             |
| YJR020W | YJR020W::YJR020W::molecular_function unknown         | 1                       | 1.202259193             |             |
|         | 1.014200235 1.208259727 0.796761507                  | 1                       | 1.207131342             | 1.352868102 |
|         | 1.037421449 0.950265631 1                            | 1.229652072             | 1.319732113             | 1.35102817  |

|             |                                                                                          |             |             |             |             |
|-------------|------------------------------------------------------------------------------------------|-------------|-------------|-------------|-------------|
| 1.101592854 | 1                                                                                        | 1.070245202 | 1.313027526 | 1           | 1.198606188 |
| 1.058596964 |                                                                                          | 1.110572596 | 1.419609003 |             | 1.405891075 |
| 1.537350136 | 1.13531381                                                                               | 1           | 0.803150714 | 0.683003815 | 0.763591149 |
| 0.850754778 | 0.53761463                                                                               | 1           | 0.817571156 | 0.679679836 | 1.00093015  |
| 0.675598269 | 0.875686298                                                                              | 0.895763354 |             |             |             |
| YJR022W     | YJR022W::LSM8::Like Sm-B protein                                                         |             |             | 0.948090967 | 1.043157298 |
| 0.921352305 | 1.174762847                                                                              |             | 0.922574765 | 0.889689423 | 1.154057569 |
| 1.303455409 |                                                                                          | 0.907840921 | 0.998484854 | 1.103126311 | 1.025001532 |
|             | 0.596879746                                                                              |             | 0.458681791 | 0.986269191 | 0.408289669 |
| 0.862809762 | 1.05789766                                                                               | 0.629272598 | 0.767760335 | 1.149808663 | 1           |
| 0.833347034 | 1.238421878                                                                              |             | 1           |             | 1.281876207 |
| 1.462309179 | 1.267027951                                                                              |             |             |             |             |
| YGR018C     | YGR018C::YGR018C::molecular_function unknown                                             |             |             | 1           | 1.161557796 |
| 1.476791785 | 0.9847149                                                                                | 1.609897793 | 1           | 1.03864376  | 1.003309578 |
| 1.497290403 | 1.553769634                                                                              | 1           | 1.252465635 | 1.446985729 | 1.78180669  |
| 1.156527278 | 1                                                                                        | 1.63213476  | 1.181863404 | 0.883742743 | 1.415009532 |
| 1.879241715 | 2.157785712                                                                              | 1.051540916 | 1.091484648 | 1           | 1.151956044 |
| 1.035347384 | 0.782351871                                                                              | 0.674312231 | 1.023011922 | 1           | 0.979122298 |
| 1.532429119 | 1.023344715                                                                              | 0.827708495 | 1.425830546 | 1           | 1.316020837 |
| 2.24542938  | 1.350414531                                                                              | 2.293977006 | 2.348512695 | 1.141813714 |             |
| YJR024C     | YJR024C::YJR024C::molecular_function unknown                                             |             |             | 1           | 1.2508062   |
| 1.210907809 | 0.921237724                                                                              | 1.056775847 | 1           | 1.051047423 | 0.941673581 |
| 1.36170198  | 1.369569628                                                                              | 1           | 1.033622003 | 0.931904411 | 0.943875933 |
| 1.088469656 | 1                                                                                        | 1.271556507 | 0.618543109 | 0.704379122 | 0.938127892 |
| 1.513625426 | 1.104952504                                                                              | 0.879442818 | 1.175284266 | 1           | 1.032095679 |
| 0.877598711 | 1.232481697                                                                              | 1.185604841 | 0.872868776 | 1           | 0.879207091 |
| 0.912874032 | 0.816177876                                                                              | 0.747270652 | 0.822013192 | 1           | 1.463265404 |
| 1.195512341 | 1.272540643                                                                              | 1.215386277 | 1.058629408 |             |             |
| YGR020C     | YGR020C::VMA7::vacuolar H-ATPase 14 kDa subunit (subunit F) of the catalytic (V1) sector |             |             | 1           | 1.64856601  |
| 0.986537429 | 1.184376111                                                                              | 1.551073207 | 1.606939392 | 1           | 1.038053507 |
| 1.370356521 | 1.893256202                                                                              | 1.221825122 | 1           | 1.245031181 | 0.855356207 |
| 0.828153166 | 0.921664072                                                                              | 1           | 1.483455714 | 0.939075165 | 1.160810185 |
| 0.857289536 | 1                                                                                        | 0.936344909 | 1.186779746 | 0.836899584 | 0.966815688 |
| 1.04108289  | 1                                                                                        | 1.169871832 | 1.552263544 | 0.884621363 | 1.181618948 |
| 1.271324745 | 1                                                                                        | 1.200983989 | 0.876485599 | 0.979617413 | 1.270565458 |
| 1.176903013 | 0.84847964                                                                               |             |             |             |             |
| YJR026W     | YJR026W::YJR026W::molecular_function unknown                                             |             |             | 1           | 1.084049368 |
| 0.889038464 | 1.52272652                                                                               | 0.771892006 | 1           | 1.428266432 | 1.20141275  |
| 0.976904232 | 0.8125048                                                                                | 1           | 1.506962596 | 1.413825648 | 0.855498818 |
| 0.797383307 | 1                                                                                        | 0.955582093 |             | 0.877400049 | 0.548914145 |
| 0.433733597 | 0.369922778                                                                              | 0.367972905 | 0.574450331 | 1           | 0.910158538 |
| 0.978985671 | 1.672501258                                                                              | 2.126590647 | 0.881412117 | 1           | 0.919383187 |
| 1.117172648 | 3.38039469                                                                               | 4.828164556 | 1.685770236 | 1           | 0.915469951 |
| 1.629201203 | 1.686979339                                                                              | 1.055649859 | 0.717477898 | 1.132181817 |             |
| YGR034W     | YGR034W::RPL26B::Homology to rat L26                                                     |             |             | 1           | 1.117587111 |
| 1.180821681 | 0.761457032                                                                              | 1.442794716 | 1           | 0.880382985 | 0.817840962 |
| 1.210781671 | 1.052178893                                                                              | 1           | 0.788886052 | 0.823360611 | 0.885679356 |
| 0.82834371  | 1                                                                                        | 0.677190485 | 0.372391871 | 0.266040191 | 0.588284367 |
| 1.537596506 | 1.148310729                                                                              | 0.748808923 | 0.868109804 | 1           | 0.95422316  |
| 0.85732832  | 0.72836283                                                                               | 0.937137877 | 0.872320765 | 1           | 0.904609017 |
| 1.473296351 | 0.750610809                                                                              | 0.608213715 | 1.501085415 | 1           | 1.09388505  |
| 1.404512765 | 0.781809512                                                                              | 1.895398556 | 1.270595084 | 1.15144561  |             |
| YJR028W     | YJR028W::YJR028W::not yet annotated                                                      |             |             | 1           | 1.024579642 |
| 1.411850526 | 0.607925795                                                                              | 1           | 1.03854834  | 1.100421735 | 0.78659078  |
| 0.64733656  | 1                                                                                        | 1.536291984 | 1.584267173 | 0.905627201 | 1           |
| 0.968816944 | 0.439562047                                                                              | 0.851506077 | 0.680112926 | 1           | 0.331650012 |

|         |                                                                                                                                                                                      |             |             |             |             |             |             |
|---------|--------------------------------------------------------------------------------------------------------------------------------------------------------------------------------------|-------------|-------------|-------------|-------------|-------------|-------------|
|         | 0.290195315                                                                                                                                                                          | 0.352533831 | 0.612250166 | 1           | 1.146777815 | 1.047732405 |             |
|         | 1.366628682                                                                                                                                                                          | 1.691865171 | 1.271911028 | 1           | 0.964218455 | 0.978955743 |             |
|         | 2.462664063                                                                                                                                                                          | 4.14470702  | 1.796702328 | 1           | 0.783724856 | 1.498450062 |             |
|         | 1.416742902                                                                                                                                                                          | 0.898364318 | 0.614416287 | 0.827464674 |             |             |             |
| YGR036C | "YGR036C::CAX4::CAX4p contains 3 short stretches of amino acids that are characteristic for a wide variety of phosphatases, including lipid phosphatases and a protein phosphatase." |             |             |             |             |             |             |
|         | 1.120348552                                                                                                                                                                          | 0.757273146 | 1           | 1.113801089 | 1.049224888 | 0.919943721 |             |
|         | 0.936567604                                                                                                                                                                          | 1           | 0.953887357 | 0.968646749 | 0.867534217 | 0.88739997  | 1           |
|         | 0.805123809                                                                                                                                                                          | 0.690165582 | 0.73122096  | 0.981163    | 1           | 1.122158371 |             |
|         | 1.061437486                                                                                                                                                                          | 0.804659085 | 0.8945531   | 1           | 0.956163663 | 1.118724742 |             |
|         | 1.08243034                                                                                                                                                                           | 1.186178837 | 0.998533897 | 1           | 0.987935618 | 1.138243016 |             |
|         | 0.872245477                                                                                                                                                                          | 0.784698244 | 0.576747172 | 1           | 1.113946934 | 0.788731802 |             |
|         | 0.865141805                                                                                                                                                                          | 0.765327752 | 0.597939712 | 1.34058036  |             |             |             |
| YJR042W | YJR042W::NUP85::Protein in nuclear pore complex; may function in nuclear envelope integrity; may also be involved in tRNA biogenesis                                                 |             |             |             |             |             |             |
|         | 1.757503955                                                                                                                                                                          | 1.764065714 | 1.655686473 | 1           |             |             | 1           |
|         |                                                                                                                                                                                      | 3.564226171 | 2.113685495 |             | 2.547868582 |             |             |
|         |                                                                                                                                                                                      |             | 1           | 1.072563186 | 0.9960893   | 1.349392037 |             |
|         | 0.892834725                                                                                                                                                                          | 1           | 1.086035713 | 1.104157471 | 1.427942616 | 1.34950575  |             |
|         | 1.485764292                                                                                                                                                                          | 1           | 0.871122671 | 0.985464546 | 0.822111364 | 1.009688117 |             |
|         | 0.609479015                                                                                                                                                                          |             |             |             |             |             |             |
| YGR038W | YGR038W::ORM1::Product of gene unknown                                                                                                                                               |             |             |             |             |             |             |
|         | 1.460734669                                                                                                                                                                          | 0.982247752 | 1.420480703 | 1           | 1.155803788 | 1.144368138 |             |
|         | 1.401615779                                                                                                                                                                          | 1.22544213  | 1           | 1.429415776 | 1.317722518 | 1.622363589 |             |
|         | 0.881654195                                                                                                                                                                          | 1           | 1.800828259 | 1.156696245 | 1.437039921 | 1.520597185 | 1           |
|         | 1.061333356                                                                                                                                                                          | 0.861161986 | 1.007151173 | 0.682036648 | 1           | 1.07377181  |             |
|         | 0.94859738                                                                                                                                                                           | 0.748254466 | 0.946532612 | 0.751615559 | 1           | 1.031716465 |             |
|         | 1.40952125                                                                                                                                                                           | 0.766629873 | 0.726068252 | 1.287648173 | 1           | 1.132424304 |             |
|         | 1.29633534                                                                                                                                                                           | 0.920298804 | 1.419120369 | 1.233745359 | 1.058629408 |             |             |
| YJR044C | YJR044C::VPS55::Vacuolar Protein Sorting                                                                                                                                             |             |             |             |             |             |             |
|         | 1.369863838                                                                                                                                                                          | 1.050015344 | 1.795816123 | 1           | 1.044278513 | 1.144059998 |             |
|         | 1.383703658                                                                                                                                                                          | 1.365072969 | 1           | 1.41562542  | 1.477613226 | 1.314599604 | 1           |
|         | 1.312697776                                                                                                                                                                          |             | 1.157853567 | 1           | 1.698891267 | 1.793695587 |             |
|         | 2.182003431                                                                                                                                                                          | 1.328511972 | 1           | 1.210095678 | 1.648719318 | 0.949082647 |             |
|         | 1.262533749                                                                                                                                                                          | 1.174728611 | 1           | 0.859483875 | 1.504620758 | 1.431740909 |             |
|         | 0.844622948                                                                                                                                                                          | 1.011417902 | 1           | 1.053679045 | 1.388922998 | 1.126298483 |             |
|         | 1.187580502                                                                                                                                                                          | 1.386714143 | 1.463167707 |             |             |             |             |
| YGR040W | YGR040W::KSS1::Recovery from alpha factor arrest                                                                                                                                     |             |             |             |             |             |             |
|         | 0.91720684                                                                                                                                                                           | 0.820012627 | 1.005894743 | 0.773420499 | 1           | 0.940910867 |             |
|         | 1.040706486                                                                                                                                                                          | 0.895498494 | 0.910422034 | 1           | 0.936950538 | 0.91939247  |             |
|         | 0.610092582                                                                                                                                                                          | 0.911356813 | 1           | 1.174204256 | 0.857901556 | 1.15467269  | 1           |
|         | 1.030918992                                                                                                                                                                          | 0.868601368 |             | 0.87789918  | 1           | 1.077597805 | 0.933464605 |
|         | 0.966221304                                                                                                                                                                          | 0.832245604 | 0.904387437 | 1           | 1.100910543 | 1.166014201 |             |
|         | 1.001447044                                                                                                                                                                          | 1.243960197 | 0.874994792 |             | 0.977236758 | 1.13861858  |             |
|         | 0.736832197                                                                                                                                                                          | 1.002317506 | 0.919405158 |             |             |             |             |
| YJR046W | YJR046W::TAH11::Essential protein.                                                                                                                                                   |             |             |             |             |             |             |
|         | 0.544014785                                                                                                                                                                          | 1           | 0.789927879 | 0.796520507 | 0.596604899 | 1           |             |
|         | 0.977773006                                                                                                                                                                          | 0.717024167 | 1.133854892 | 0.487771915 | 1           | 0.597490279 |             |
|         | 0.926954228                                                                                                                                                                          | 0.825175414 | 0.741667078 | 1           | 0.613310172 | 0.621461144 |             |
|         | 1                                                                                                                                                                                    | 1.046737784 | 0.936038731 | 1.135058861 | 0.96888453  | 1           |             |
|         | 1.176678581                                                                                                                                                                          | 0.540289884 | 0.60451357  | 0.640193113 | 0.320084615 | 1           |             |
|         | 1.06445628                                                                                                                                                                           | 0.567796283 | 0.720673913 | 0.466946637 | 0.464633878 | 0.68386236  |             |
| YGR042W | YGR042W::YGR042W::molecular_function unknown                                                                                                                                         |             |             |             |             |             |             |
|         | 1.176839913                                                                                                                                                                          | 1.076794564 | 1.478571323 | 1           | 0.941913037 | 1.031997321 |             |
|         | 1.536700423                                                                                                                                                                          | 1.732487108 | 1           | 0.807546934 | 1.124733222 | 2.392320237 |             |
|         | 1.719719472                                                                                                                                                                          | 1           | 1.202454549 | 1.364652148 | 1.921682337 | 2.251137499 | 1           |

|             |                                                                                                     |             |             |             |             |
|-------------|-----------------------------------------------------------------------------------------------------|-------------|-------------|-------------|-------------|
| 1.315770142 | 1.946994594                                                                                         | 2.565922745 | 1.519277862 | 1           | 0.861026115 |
| 1.120216033 | 0.830349321                                                                                         | 0.703727154 | 0.958722468 | 1           | 0.794124575 |
| 1.576843969 |                                                                                                     | 1           |             |             | 1.500108068 |
| 1.774742995 |                                                                                                     |             |             |             |             |
| YJR048W     | YJR048W::CYC1::iso-1-cytochrome c                                                                   | 1           | 1.586633744 | 1.114934773 |             |
| 1.018862621 | 1.79800855                                                                                          | 1           | 0.995947678 | 0.953994866 | 1.504453548 |
| 1.724009392 | 1                                                                                                   | 0.580282605 | 0.669915702 | 1.963435221 | 0.782829718 |
| 0.982015704 | 0.275767779                                                                                         | 0.379411849 | 0.430816486 | 1           | 1.674328809 |
| 1.322838424 | 1.020337182                                                                                         | 1           | 0.371143101 | 0.253327447 | 0.197799555 |
| 0.403858551 | 0.430320566                                                                                         | 1           | 0.186377761 | 0.130910292 | 0.126252636 |
| 0.191647029 | 1.110734124                                                                                         | 1           | 0.242528183 | 0.22910949  | 0.438666114 |
| 1.14468498  | 1.35803114                                                                                          | 0.969315762 |             |             |             |
| YGR044C     | YGR044C::RME1::mediates cell type control of sporulation; negatively regulates IME1 and sporulation | 1           | 1.454719506 | 1.517233147 | 1.88881714  |
| 1.614339642 | 1                                                                                                   | 1.631298765 | 1.571962296 | 1.645350359 | 1.443098853 |
| 1.244590088 | 1.781420336                                                                                         | 1.69199027  | 1.561872693 | 1           | 1.601488595 |
| 1.604768922 | 1.249369118                                                                                         |             | 1.155120218 |             | 0.676197325 |
| 0.922635305 | 1.238671235                                                                                         | 1.279368485 | 0.909196562 | 1.131023555 | 1           |
| 0.699281016 | 1.119122579                                                                                         |             | 0.845465353 | 1.575711773 | 1           |
| 1.279102026 | 1.662856675                                                                                         | 1.434983131 | 2.185025755 | 1.369475945 |             |
| YGR058W     | YGR058W::YGR058W::molecular_function unknown                                                        | 1           | 1.213334656 |             |             |
| 1.212555626 | 1.348545241                                                                                         | 1.521670527 | 1           | 1.179568891 | 1.207622537 |
| 1.231756199 | 1.340753214                                                                                         | 1           | 1.031140931 | 1.228466266 | 0.98350643  |
| 1.44161207  | 1                                                                                                   | 0.670771497 |             | 0.436412004 | 1           |
| 0.710998592 | 0.789164929                                                                                         | 1           | 1.106839851 | 1.038676512 | 0.952802741 |
| 0.961464853 | 0.972609852                                                                                         | 1           | 0.946656443 | 1.183810545 | 0.805926061 |
| 1.097346966 | 1.406499775                                                                                         | 1           |             | 1.099350678 | 0.974221597 |
| 1.387442238 | 0.854609034                                                                                         |             |             |             | 0.785439418 |
| YGR060W     | YGR060W::ERG25::membrane-bound non-heme di-iron oxygenase involved in lipid metabolism.             | 1           | 2.492602975 | 2.213403807 | 2.227427269 |
| 2.252557362 | 2.215945528                                                                                         | 2.241855002 | 2.076401248 | 1           | 1.76718786  |
| 1.76279138  | 1.9610194                                                                                           | 2.090324855 |             | 0.819030076 |             |
| 0.770167443 |                                                                                                     |             |             | 1           | 1.03806885  |
| 1.434212892 | 2.392291461                                                                                         | 1.052434214 | 1           | 0.596212218 | 1.181236274 |
| 0.496574632 | 1.682081186                                                                                         | 1.805043569 | 1           | 0.727899768 | 0.611077569 |
| 1.689752142 | 1.973001308                                                                                         | 0.871749052 | 1.468421488 |             |             |
| YJR050W     | "YJR050W::ISY1::Interacts with Syf1p, Prp39p and Ypl213wp. May play a role in mRNA splicing."       | 1           | 1.023791908 | 1.050977323 | 1.1168121   |
| 1.276433671 | 1                                                                                                   | 0.972413651 | 0.90621507  |             | 1.272632943 |
| 1.086257183 | 1.290617918                                                                                         | 1.458964939 | 1.334423374 | 1           | 0.988989878 |
| 0.969646363 | 1.196211215                                                                                         | 1           | 1.266567146 | 0.685815791 | 1.48610359  |
| 1.464919679 | 1                                                                                                   | 1.10448698  | 1.323534311 | 1.27469295  | 0.956867961 |
| 1.3995229   | 1                                                                                                   | 1.102410683 | 2.182044208 |             | 1.185723924 |
| 1.338516853 | 1.593219251                                                                                         | 0.947698523 |             | 1.04072101  | 1.562988811 |
| YJR052W     | YJR052W::RAD7::Nucleotide excision repair protein involved in G(sub)2 repair of inactive genes      | 1           | 1.055253243 | 0.850224333 | 1.080597095 |
| 0.934657516 | 1                                                                                                   | 0.901339628 | 0.976343745 | 0.901968167 | 0.909247957 |
| 1.002536979 | 0.999731464                                                                                         |             | 1.198756554 | 1           | 1.399538858 |
| 1.110512578 | 1.068826812                                                                                         | 1           | 1.222534825 | 1.071687861 | 0.966936665 |
| 1.193313817 | 1                                                                                                   | 0.887933152 | 0.833845481 | 1.047203468 | 1.337816285 |
| 1.220386607 | 1                                                                                                   | 1.163853913 | 1.294719443 | 1.140918529 | 0.994422599 |
| 0.867117484 | 1                                                                                                   | 0.892016958 | 0.894634321 | 0.803050222 | 0.807704267 |
| 0.754131991 |                                                                                                     |             |             |             |             |
| YJR066W     | YJR066W::TOR1::Involved in cell cycle signaling and meiosis                                         | 1           |             |             |             |
| 1.252686866 | 1.082329496                                                                                         | 1.163016035 | 0.988560101 | 1           | 1.155263044 |
| 1.299321415 | 1.209021065                                                                                         | 1.235505704 | 1           | 1.22506229  | 1.446385628 |
| 2.011489156 | 1.372134522                                                                                         | 1           | 0.982044728 | 0.694104303 | 1.129405185 |

0.947535187 1 1.158133827 1.405481832 1.112924525 0.763155219 1  
 0.90112354 0.935947363 0.981241082 0.981713718 0.90747162 1  
 0.980889891 1.424005564 1.101372705 0.957249355 1.285881055 1  
 0.829503957 1.334026703 1.105170994 1.077212991 0.941420195 0.941295842  
 YGR062C "YGR062C::COX18::Mitochondrial inner membrane protein, required for  
 export of the Cox2p C terminus from the mitochondrial matrix to the  
 intermembrane space" 1 1.211352265 1.323283804 1.27039086 0.968175013 1  
 1.316178699 1.314586933 1.383929698 1.338942912 1 1.254602018  
 1.242702196 1.467987164 1.199499859 1 1.030866387 1.012927715  
 1 1.13325743 1.310205591 0.706049275 1 1.224580298  
 1.301303124 1.134039259 1.058697595 0.958281122 1 1.065062878  
 0.927856008 0.90010474 0.846370865 1.240569442 1 1.184091284  
 1.149385031 0.990344727 0.903076307 1.466241435 0.942171402  
 YJR068W YJR068W::RFC2::RFC is a DNA binding protein and ATPase that acts as  
 a processivity factor for DNA polymerases delta and epsilon and loads  
 proliferating cell nuclear antigen (PCNA) on DNA 1 0.861996467  
 0.870584194 0.861879072 1.015602748 1 0.72573311 0.71118157  
 0.987665849 1.013481546 1 0.682225971 0.82297311 1.123932972 1  
 1.011558968 0.643598336 0.804884374 0.964556305 1 1.294120911  
 1.174549542 1.107661343 0.974190001 1 0.776478804 0.967588927  
 1.178056301 0.865305936 0.962675846 1 1.020836546 1.246512525  
 0.935048263 1.03601036 0.938233337 1 0.890067045 1.036551712  
 0.6645195 0.818141757 0.605663135 0.949176408  
 YGR064W YGR064W::YGR064W::molecular\_function unknown 0.95547874  
 0.995326947 0.919116042 1.222732235 0.885042176 0.779851196  
 1.278605665 1.179552779 0.869260691 0.845115909 1.048203719  
 0.943745383 1 1.038158053 0.837032419 1.204740336 1  
 1.225996662 1.011769481 0.474748927 1 1.173127333 1.40563506  
 1.378533439 1.493753947 0.983589816 1 0.878681478 1.202401782  
 0.976748026 0.937082487 1.401351447 1 1.060315256 0.996462165  
 0.939269149 1.427046841 0.945615938 1.006967579  
 YJR070C YJR070C::YJR070C::molecular\_function unknown 1 0.930338643  
 0.633113978 0.700648195 0.684767591 1 0.672209438 0.585024188  
 0.721162187 0.935283376 1 0.646540323 0.286691931 0.246067428  
 0.873096518 1 0.374208754 0.123946851 0.153352759 0.422063182 1  
 0.325396474 0.159985033 0.125697937 0.511420203 0.884477248  
 0.335025957 0.727434749 1.258482369 1.00758619 1 0.901668189  
 0.472328448 0.338600168 0.501888763 0.609211425 1 0.588578939  
 0.364246833 0.556063371 0.702205409 0.245623888 0.721514177  
 YGR066C YGR066C::YGR066C::molecular\_function unknown 1 1.031715986  
 1.116989604 1.024475216 1.010993761 1 0.980119896 1.071952779  
 1.123192801 1.034562045 1 0.996057252 1.029160181 1.417266877 1  
 1.472876926 1.515270981 1.096897346 1 1.218421874 1.091077484  
 0.86298061 0.894748601 1.277516599 1.002243376 0.795035093  
 0.870753545 1 1.717343794 1  
 1.057458818 0.956958706 0.984518713 1.983777818 0.762668497  
 YJR072C YJR072C::YJR072C::molecular\_function unknown 0.96902287  
 0.815393711 0.906525293 0.883831463 0.813901058  
 1.146099065 0.713734153 0.710785814 0.718668101 1.328488066 1  
 0.98422483 0.742734005 0.598933181 0.699552276 1 1.728095277  
 2.437514252 1.371600062 1.242724934 1 0.919855206 0.983251809  
 1.182813608 0.904791347 1.073916352 1 1.460033923 1.612828765  
 1.336667453 1.088372547 1.470279643 1 1.093179153 1.442715425  
 0.939269178 1.063504741 0.616706085 1.139186823  
 YGR068C YGR068C::YGR068C::molecular\_function unknown 1.004730173  
 0.818810121 0.967196301 0.831144659 1.05005316 0.817512639  
 0.812801078 0.896990229 0.949829868 0.817455794 1

|             |                                                                                                      |             |             |             |             |
|-------------|------------------------------------------------------------------------------------------------------|-------------|-------------|-------------|-------------|
| 1.469067009 | 1.261138327                                                                                          | 1.173107723 | 0.681613234 | 1           | 1.015202542 |
| 0.645036778 | 1.773632311                                                                                          | 0.71061054  | 1           | 0.769659075 | 0.644611612 |
| 0.642734978 | 0.809568602                                                                                          | 1           | 0.737412314 | 0.474342751 | 0.372148987 |
| 1.158838498 | 0.484920369                                                                                          | 1           | 0.754865975 | 0.521951006 | 0.752211561 |
| 0.489769323 | 0.923933451                                                                                          | 0.781056625 |             |             |             |
| YJR074W     | YJR074W::MOG1::Required for nuclear-protein import                                                   |             |             |             | 1           |
| 1.701193391 | 1.692713925                                                                                          | 1.283088855 | 1.741617804 | 1           | 1.321315086 |
| 1.822479817 | 1.912273791                                                                                          | 1           | 1.233061596 | 1.298463492 | 3.742050785 |
| 1.247054046 | 1                                                                                                    | 0.88339489  | 0.701789007 | 1.219002974 | 1           |
| 1.963269852 | 1.523975279                                                                                          | 1.411208426 | 1.375020063 | 1           | 1.102165776 |
| 1.136335275 | 0.991551713                                                                                          | 1.258976408 | 0.996774754 | 1           | 1.188537373 |
| 1.415683074 | 1.889009268                                                                                          | 1.377308138 | 1.356694194 | 1           | 0.765658688 |
| 1.182528897 | 0.971802445                                                                                          | 0.972168422 | 0.810581693 | 0.988579451 |             |
| YGR082W     | YGR082W::TOM20::Translocase of Outer Mitochondrial membrane                                          |             |             |             | 1           |
| 1.223579002 | 1.165170754                                                                                          | 0.920476125 | 1.101401262 | 1           | 0.959908544 |
| 1.142098413 | 1.141387057                                                                                          | 1.062485995 | 1           | 0.997222216 | 0.915303109 |
| 1.184154972 | 0.73684099                                                                                           | 1           | 0.991910621 | 0.68366111  | 0.866275508 |
| 1.009313177 | 1                                                                                                    | 0.919230703 | 1.044544049 | 0.761949018 | 1           |
| 1.244492701 | 1.113244949                                                                                          | 1.089597788 | 1.009915376 | 0.83523181  | 1           |
| 1.087756952 | 1.128534714                                                                                          | 0.735744586 | 0.571030114 | 0.889877766 | 1           |
| 1.025370562 | 1.037204004                                                                                          | 0.70078519  | 0.891004225 | 1.080198053 | 1.165455518 |
| YJR076C     | YJR076C::CDC11::involved in proper bud growth                                                        |             |             |             | 1           |
| 0.949309645 | 1.059014218                                                                                          | 1.210860636 | 1           | 0.952965402 | 0.903726938 |
| 0.928289646 | 1.030162965                                                                                          | 1           | 0.886385944 | 0.853114815 | 1.204052233 |
| 1.199242206 | 1                                                                                                    | 0.919878734 | 0.60339461  | 0.682567756 | 1           |
| 0.893162106 | 0.94658316                                                                                           | 0.919901398 | 1.073288469 | 1           | 0.920588684 |
| 0.778342368 | 1.04188457                                                                                           | 1.049934246 | 1.135077716 | 1           | 0.853756512 |
| 0.94949433  | 1.029861222                                                                                          | 0.92000692  | 0.940431106 | 1           | 0.870718307 |
| 0.849848704 | 0.786898854                                                                                          | 0.728287632 | 0.894132439 | 0.90539525  |             |
| YGR084C     | YGR084C::MRP13::35 kDa mitochondrial ribosomal small subunit protein                                 |             |             |             |             |
| 1           | 0.84981562                                                                                           | 1.281513506 | 1.188563489 | 1.268857773 | 1           |
| 1.24615239  | 1.293730844                                                                                          | 1.08825157  | 1           | 0.974040551 | 1.008355699 |
| 1.027714467 | 1.045162428                                                                                          | 1           | 0.811217775 | 0.579486584 | 0.587866628 |
| 1.449954253 | 1                                                                                                    | 1.540481809 | 1.103621134 | 1.258921447 | 1.410194919 |
| 1.103443353 | 0.984430176                                                                                          | 0.903478771 | 0.839862282 | 1.027408951 | 1           |
| 1.171654737 | 1.222565377                                                                                          | 1.14044114  | 0.871473223 | 1.544781454 | 1           |
| 1.223465743 | 0.931839251                                                                                          | 0.875829809 | 0.944511703 | 1.606819246 | 1.013972585 |
| YJR091C     | YJR091C::JSN1::benomyl dependent tubulin mutant                                                      |             |             |             | 1           |
| 0.945779385 | 1.16699068                                                                                           | 0.869096832 | 1           | 1.30599431  | 1.32693887  |
| 0.833369832 | 0.707027731                                                                                          | 1           | 1.455227173 | 1.42926478  | 0.858934912 |
| 0.980220028 | 1                                                                                                    | 1.228891418 | 0.500458263 | 1.016134768 | 0.725004234 |
| 0.567587646 | 0.764107102                                                                                          | 0.911048644 |             | 0.941540311 | 1.066744795 |
| 0.86079775  | 0.989915682                                                                                          | 0.857357338 | 1           | 1.30316729  | 0.817964822 |
| 1.29436017  | 0.838350359                                                                                          | 0.633457492 | 1           | 0.706116405 | 0.793119224 |
| 0.796404196 | 0.569490227                                                                                          | 0.50580236  | 0.620817408 |             |             |
| YGR086C     | YGR086C::YGR086C::molecular_function unknown                                                         |             |             |             | 1           |
| 1.154224034 | 1.499341758                                                                                          | 1.175182457 | 1           | 1.436686887 | 1.394306715 |
| 1.02712238  | 1.289979825                                                                                          | 1           | 1.032903865 | 1.320130855 | 1.325092157 |
| 1.061001457 | 1                                                                                                    | 1.370453934 | 1.450508808 | 1.485579566 | 1.537735447 |
| 1.28117694  | 0.754660262                                                                                          | 1.395565885 | 1.47403327  | 1           | 1.017370257 |
| 0.941059071 | 0.859490348                                                                                          | 0.702440565 | 0.815545362 | 1           | 1.075484305 |
| 1.199994166 | 1.456579097                                                                                          | 0.700474177 | 1.206677063 | 1           | 1.071079751 |
| 0.969451289 | 0.965656651                                                                                          | 1.318364043 | 1.283662201 | 0.895763354 |             |
| YJR093C     | YJR093C::FIP1::component of a pre-mRNA polyadenylation factor that interacts with poly(A) polymerase |             |             |             | 1           |
| 1.164925915 | 1                                                                                                    | 1.008939539 | 0.991846182 | 0.804122094 | 0.84169221  |
| 0.972639983 | 0.88530912                                                                                           | 0.8623902   | 0.845441153 | 1           | 0.746689027 |



|             |                                                                |             |             |             |             |
|-------------|----------------------------------------------------------------|-------------|-------------|-------------|-------------|
| 0.497946112 | 0.523820392                                                    | 1           | 1.276300866 | 1.507661909 | 1.45611298  |
| 1.626761456 | 1                                                              | 0.799770816 | 0.716663224 | 0.798785474 | 0.752033046 |
| 0.852999465 | 1                                                              | 0.988268651 | 1.065279521 | 1.095395165 | 1.092497906 |
| 1.220209895 | 1                                                              | 0.858834523 | 0.970234315 | 0.577501211 | 0.98268027  |
| 0.542049204 | 1.408003427                                                    |             |             |             |             |
| YGR088W     | YGR088W::CTT1::cytoplasmic catalase T                          | 1           |             | 0.986858746 |             |
| 1.742515387 | 2.578548221                                                    | 2.293258115 | 1           | 2.298038787 | 3.829467381 |
| 2.238902138 | 1                                                              | 4.282451121 | 10.51974364 | 19.45976085 | 5.421187353 |
| 7.835676062 | 24.67443617                                                    | 8.84192774  | 1           | 3.28593731  | 2.036474907 |
| 9.31604852  | 3.767945354                                                    | 1           | 1.022429262 | 1.006984697 | 0.834190054 |
| 0.800526897 | 1.089408444                                                    | 1           | 0.626411631 | 0.740942517 | 0.789859418 |
| 0.778190696 | 1.372182736                                                    | 1           | 0.92830604  | 0.873399686 | 0.956989808 |
| 0.934206361 | 2.034793105                                                    | 0.830967177 |             |             |             |
| YGR090W     | YGR090W::UTP22::U3 protein                                     | 1           | 1.397284687 | 1.265300167 |             |
| 1.636278391 | 1.315054851                                                    | 1           | 1.631170983 | 1.061090085 | 1           |
| 1.212263136 | 1.113780246                                                    | 0.784870811 | 1.176856045 | 1           | 0.770609656 |
| 0.516802158 | 0.707418529                                                    | 1           |             | 1           |             |
| 0.741961257 | 0.674370663                                                    | 0.80829052  | 0.977751522 | 0.880584707 | 1           |
| 0.814174889 | 0.442053846                                                    | 0.608547089 | 0.755655081 | 0.497616082 | 1           |
| 0.655406665 | 0.618265645                                                    | 0.772800826 | 0.702703491 | 0.648469287 | 0.582289979 |
| YGR092W     | YGR092W::DBF2::kinase required for late nuclear division       | 1           |             |             |             |
| 0.796691883 | 0.88146967                                                     | 0.878130085 | 0.678564075 | 1           | 0.967485857 |
| 0.944338643 | 0.817664179                                                    | 0.743576097 | 1           | 0.849325224 | 0.927341868 |
| 0.729645082 | 0.748256886                                                    | 1           | 1.237137905 | 0.934920222 | 0.934509724 |
| 1.058639928 | 0.944405823                                                    | 0.991548541 | 0.741442264 | 1           | 0.839466165 |
| 0.892111076 | 0.855099238                                                    | 0.862118433 | 0.964880207 | 1           | 0.984167416 |
| 0.799249142 | 0.882581207                                                    | 0.974741551 | 1.156700708 | 1           | 1.138530943 |
| 0.791333179 | 0.908537373                                                    | 0.971103281 | 1.186578689 | 0.931663945 |             |
| YCR006C     | YCR006C::YCR006C::molecular_function unknown                   |             |             | 1.222667955 |             |
| 0.797172586 | 0.83799747                                                     | 0.984321892 | 0.864426635 |             |             |
| 1.001133043 | 0.945215463                                                    | 0.833480983 | 0.695296803 | 1.129753349 | 1           |
| 0.836726371 | 0.481799315                                                    | 0.5560586   | 0.740410186 |             |             |
| 0.496820224 | 1                                                              | 0.751808275 | 0.697524467 | 0.869259539 | 0.92945571  |
| 0.736839855 | 0.734271114                                                    | 0.861190412 | 1.069873608 | 1.559019606 | 1           |
| 0.903172685 | 1.056982207                                                    | 1.390001015 | 0.572057746 | 1.315935799 | 1.161953067 |
| YCR008W     | YCR008W::SAT4::Protein with similarity to Npr1p protein kinase | 1           |             |             |             |
| 1.466122733 | 1.153604338                                                    | 1.616810515 | 1.165681686 | 1           | 1.4950369   |
| 1.412088212 | 1.094286699                                                    | 1.236899324 | 1           | 1.533857689 | 1.057315114 |
| 1.204040187 | 1.339711027                                                    | 1.303002378 | 0.739386273 | 0.937114117 |             |
| 0.610632764 |                                                                |             | 1           | 0.961753095 | 0.871653693 |
| 0.948629308 | 1.036048698                                                    | 1.174658841 | 1           |             | 0.918591489 |
| 1.152455853 | 1                                                              | 0.448527352 | 0.591995001 | 0.644195533 | 0.512262924 |
| 0.572482472 | 0.934290836                                                    |             |             |             |             |
| YCR010C     | YCR010C::ADY2::Accumulation of DYads                           | 1           | 1.413773303 |             |             |
| 1.122716778 |                                                                | 1           | 1.027170398 | 1.072786084 | 1.143182652 |
| 1.288017726 | 1                                                              | 1.324334284 | 1.067689028 | 1.201002244 | 1.027952565 |
| 1.18188805  |                                                                | 0.952447578 | 1           | 0.819942067 | 0.932875081 |
| 0.81505733  | 0.770967059                                                    | 1.002027182 | 0.938809002 | 0.805229813 |             |
| 0.859995309 | 0.927208951                                                    | 1           | 0.834651821 | 1.124204343 | 1.185419616 |
| 0.947698813 | 1.559443079                                                    | 1           | 0.777385646 | 1.031466654 | 0.911692319 |
| 0.84179918  | 0.887868433                                                    | 1.112042463 |             |             |             |
| YCR012w     | YCR012w::PGK1::3-phosphoglycerate kinase                       | 1           | 1.236122762 |             |             |
| 0.692541515 | 0.998462259                                                    | 0.664618195 | 1           | 1.157300561 | 0.991370492 |
| 0.689982152 | 0.779462446                                                    | 1           | 1.034447642 | 1.061871083 | 1           |
| 1.620643703 | 2.033854965                                                    | 1.158673507 | 1           | 1.45647703  | 0.544668505 |
| 0.938099752 | 1.213725071                                                    | 1           | 1.107353225 | 0.996140489 | 1.4444828   |
| 1.447135325 | 1.347280647                                                    | 1           | 1.10892866  | 0.960665633 | 1.428837485 |

1.019140365 0.278834983 1 1.102571145 0.943627046 1.557903555  
0.570616418 0.881824441 1.23200292  
YJR095W YJR095W::SFC1::succinate-fumarate carrier 1 0.982032952  
0.993342662 1.168261699 0.784154501 1 1.082052574 1.124037285  
0.807641639 0.836091901 1 1.068182563 0.889911076 0.522687406  
1.034634342 1 0.647053882 0.433688021 0.565258617 0.433947367 1  
0.995803279 1.167978114 0.800893578 0.57529987 1 1.413795052  
0.888201103 1.098035898 1.160712817 1.097715859 1 1.038750223  
0.763489258 0.801366569 0.901075763 0.603509674 1 0.815552376  
0.94217722 0.898237437 0.991664136 0.654161728 1.331824128  
YCR024ca YCR024ca::PMP1::May regulate plasma membrane H(+)-ATPase 1  
1.92297146 1.093426161 1.289204777 1.708392945 1 1.065460385  
0.945710869 1.196593654 1.495883918 1 1.326219777 0.877660209  
1.374316782 1.142054167 1 1.017937274 0.859920753 0.660683896 1  
0.730561323 0.604486749 0.656507743 0.700563052 1 1.275292183  
1.047404107 1.419585665 2.031829028 1.200310407 1 0.778902766  
1.007092683 0.69191343 0.599031444 0.891847952 1 0.989931351  
0.918339509 0.979560323 1.254638288 0.943633542 1.028858158  
YJR097W YJR097W::YJR097W::molecular\_function unknown 1 1.316592785  
1.224838513 1.322865511 1.769142659 1 1.059914104 1.142885689  
1.615622904 1.899752064 1 0.770480586 0.686535327 0.78040589  
1.504720153 1 0.656937056 0.606239947 0.860430207 1  
0.908634293 1 0.678923194 0.52336087 0.456152733  
0.764677194 0.74108877 1 0.694398183 0.959599802 0.49255988  
1.490974231 1.422421121 0.602226247 0.717591399 0.896714275  
1.598525039 0.5882145 0.649712994  
YCR028C YCR028C::FEN2::Protein with similarity to Dal5p and members of the  
allantoate permease family of the major facilitator superfamily (MFS) 1  
1.11435768 0.69918208 1.030130612 0.596200561 1 0.968298328  
0.799294456 0.701144172 0.758079043 1 1.142246175 0.772691652  
0.551500459 0.79056981 1 0.499866839 0.348465401 0.534826219 1  
0.91834093 1 0.908086396 0.818459738 1.165144791  
1.458503508 0.908503735 1 0.782108481 0.587751545 0.934761822  
0.783604225 0.457108125 1 0.688554968 0.554546254 0.771530944  
0.461167297 0.601829856 0.669852347  
YJR099W YJR099W::YUH1::ubiquitin hydrolase 1 1.236840637 1.465163359  
1.333441433 1.718097127 1 1.26212051 1.168557935 1.473012306  
1.587956436 1 1.696293234 2.102295141 2.307196296 1.559883224 1  
1.970450401 1.965617296 1.515016596 1.814375237 1 3.287277534  
3.739991253 2.564865724 1.771651276 1 1.140128787 1.529159179  
1.128517889 0.865752265 1.025312587 1 1.236084939 1.841124109  
1.355148915 1.281368096 1.835238239 1 1.252770906 1.822172722  
1.428674346 1.887652774 1.26930504 1.868581671  
YCR031c "YCR031c::RPS14A::Homology to mammalian S14, E. coli S11" 1  
1.485920759 1.302147744 0.883051386 1.180181609 1 0.951563284  
0.88693594 1.141863595 1 1.057597075 1.013656168 1.128775641  
1.023837782 1 0.925737721 0.422755693 0.414484984 0.664587578 1  
1.151111789 0.80678115 0.535788887 0.724109672 1 1.346931068  
0.952228108 1.108825903 1.210927634 1.229646619 1 0.849506847  
0.955065536 0.676046373 0.463497233 0.867177889 1 0.952650244  
1.271617924 0.609171623 1.186269149 0.746484253 1.098032451  
YGR106C YGR106C::YGR106C::molecular\_function unknown 1 1.459376784  
1.100949706 0.995686402 1.571978826 1 1.279030054 1.168270443  
1.251459535 1 1.175482591 0.994201996 1.186314369 1.014037882 1  
1.093480806 0.770335495 0.769011 0.837601487 1 1.121882754  
0.580492469 0.683142548 0.682476477 1 1.312424754 1.438028394  
1.151897789 1.581697019 1.226986049 1 1.176697833 1.282504562

|         |                                                                                                                              |             |             |             |             |             |             |             |
|---------|------------------------------------------------------------------------------------------------------------------------------|-------------|-------------|-------------|-------------|-------------|-------------|-------------|
|         | 1.214262314                                                                                                                  | 0.710554695 | 0.971222205 | 1           | 1.436394439 | 1.253778573 |             |             |
|         | 1.037143665                                                                                                                  | 1.589574208 | 1.318292897 | 1.115545019 |             |             |             |             |
| YJR101W | YJR101W::RSM26::mitochondrial ribosome small subunit component                                                               |             |             |             |             |             | 1           |             |
|         | 1.883677545                                                                                                                  | 1.304063018 | 1.560955259 | 1.470872883 | 1           | 1.48767214  |             |             |
|         | 1.613540276                                                                                                                  | 1.432610753 | 1           | 1.235731014 | 1.251406331 | 1.254605528 |             |             |
|         | 1.21036857                                                                                                                   | 1           | 1.084562889 |             | 1.191054564 | 1           | 0.959565264 |             |
|         |                                                                                                                              | 1           | 1.24515456  | 0.930913331 | 0.892163748 | 1.117548971 | 1           |             |
|         | 1.129812512                                                                                                                  | 1.606598007 | 0.904052625 |             | 1.49333415  | 1           | 1.610908806 |             |
|         | 1.330420696                                                                                                                  |             | 1.49969497  | 1.035893223 | 1.578750049 |             |             |             |
| YCR033W | YCR033W::SNT1                                                                                                                |             |             |             |             |             | 1.02491958  |             |
|         | 0.89967254                                                                                                                   |             | 0.889885097 | 1.045659688 |             | 0.895815786 |             |             |
|         | 0.790894614                                                                                                                  | 0.786941467 |             | 1.295202402 |             |             |             |             |
|         | 0.814177018                                                                                                                  |             |             |             | 0.949529172 | 0.915798999 |             |             |
|         | 0.784012999                                                                                                                  | 0.956950774 | 1.056386662 | 1           | 0.870452589 | 1.330185361 |             |             |
|         | 1.055907432                                                                                                                  | 1.513000237 | 1           | 1.158222207 | 1.605704637 | 1.320052317 |             |             |
|         | 0.253514623                                                                                                                  | 1.66268788  | 1.313436    |             |             |             |             |             |
| YGR108W | YGR108W::CLB1::Involved in mitotic induction                                                                                 |             |             |             |             |             | 1           | 0.852460328 |
|         | 0.828968341                                                                                                                  | 1.122607745 | 1.095837428 | 1           | 1.10327341  | 0.95707203  |             |             |
|         | 0.913040457                                                                                                                  | 1.006132666 | 1           | 1.006318745 | 1.158892221 | 0.729645063 |             |             |
|         | 1.426306912                                                                                                                  | 1           | 0.711736044 | 0.619416964 | 0.493748129 | 0.444411446 | 1           |             |
|         | 0.89891779                                                                                                                   | 0.422546465 | 0.71813468  | 0.42863611  | 1           | 0.800009407 |             |             |
|         | 0.762727134                                                                                                                  | 0.672025348 | 0.961124098 | 1.104152533 | 1           | 0.928954882 |             |             |
|         | 0.909212318                                                                                                                  | 0.996648194 | 1.23273315  | 1.538487545 | 1           | 1.271585764 |             |             |
|         | 0.970953008                                                                                                                  | 1.71241791  | 1.619310917 | 1.799138765 |             |             |             |             |
| YJR115W | YJR115W::YJR115W::molecular_function unknown                                                                                 |             |             |             |             |             | 1           | 1.417919909 |
|         | 1.309733844                                                                                                                  | 1.265918487 | 1.443191957 | 1           | 1.289359809 | 1.123781796 |             |             |
|         | 1.335829764                                                                                                                  | 1.313943734 | 1           | 1.339756044 | 1.344426496 | 1.724440415 |             |             |
|         | 1.235584775                                                                                                                  | 1           | 1.415818966 | 1.263784671 | 1.414581641 | 1.047752508 | 1           |             |
|         | 1.218979307                                                                                                                  | 2.09596953  | 1.067620959 | 0.77315553  | 1           | 0.416203784 |             |             |
|         | 0.430656684                                                                                                                  | 0.431020962 | 0.406956003 | 0.857819339 | 1           | 1.806547736 |             |             |
|         | 2.915343779                                                                                                                  | 1.180435044 | 0.603911737 | 1.246291807 | 1           | 1.413141237 |             |             |
|         | 1.716898107                                                                                                                  | 1.003412356 | 2.1063895   | 0.617277061 | 1.745118659 |             |             |             |
| YCR047C | YCR047C::BUD23                                                                                                               |             |             |             |             |             | 1           | 0.998628834 |
|         | 0.617014495                                                                                                                  | 1           | 0.731536423 | 0.785296037 |             | 1.025084376 | 1           |             |
|         | 0.767727319                                                                                                                  | 0.664924393 | 0.695594436 | 1.112083728 | 1           | 0.742264248 |             |             |
|         | 0.624335951                                                                                                                  | 0.774556924 | 1           | 0.765549354 | 0.617183303 | 0.71248484  |             |             |
|         | 0.816156857                                                                                                                  | 1           | 0.918768755 | 0.792067183 | 0.97977147  | 1.129536182 |             |             |
|         | 0.937673838                                                                                                                  | 1           | 0.606192961 | 0.764881173 | 0.62839584  | 0.865966433 |             |             |
|         | 0.953426909                                                                                                                  | 1           | 0.592834466 |             | 1.04647062  | 0.804248616 | 0.558949995 |             |
|         | 0.859862762                                                                                                                  |             |             |             |             |             |             |             |
| YGR110W | YGR110W::YGR110W::molecular_function unknown                                                                                 |             |             |             |             |             | 1           | 0.982566999 |
|         | 0.960023568                                                                                                                  | 1.093546771 | 1.024001578 |             | 0.995218448 | 0.952297176 |             |             |
|         | 0.920861091                                                                                                                  | 1.08290874  |             | 1.146556002 | 1.260798697 | 1.126497608 |             |             |
|         | 0.846825494                                                                                                                  | 1           | 2.436236851 |             | 1.500307609 | 1.010496922 |             |             |
|         | 0.483405245                                                                                                                  | 1           | 0.833265511 | 0.817287069 | 0.879319624 | 0.726707223 |             |             |
|         | 0.847140852                                                                                                                  | 1           | 0.595494559 | 0.649930409 | 0.614935514 | 0.730886217 |             |             |
|         | 0.705619162                                                                                                                  | 1           | 0.756918142 | 0.68935149  | 0.910368531 | 0.770491391 |             |             |
|         | 0.747782872                                                                                                                  |             |             |             |             |             |             |             |
| YJR117W | YJR117W::STE24::zinc metallo-protease that catalyzes the first step of N-terminal processing of the yeast a-factor precursor |             |             |             |             |             | 1           | 1.216398922 |
|         | 0.860392813                                                                                                                  | 1.093238029 | 0.876491518 | 1           | 1.22411305  | 1.425783898 |             |             |
|         | 0.796170923                                                                                                                  | 0.82482459  | 1           | 1.194402946 | 0.975396336 | 1.009455557 |             |             |
|         | 0.864725936                                                                                                                  | 1           | 1.505189189 | 1.244038026 | 1.866985255 | 1.204962404 | 1           |             |
|         | 0.727033992                                                                                                                  | 1.072243734 | 0.688063131 | 0.85452974  | 1           | 1.244887772 |             |             |
|         | 1.064230646                                                                                                                  | 1.281161945 | 1.076145104 | 0.744989465 | 1           | 1.104941444 |             |             |
|         | 0.883211705                                                                                                                  | 0.648180662 | 0.589873783 | 0.374629445 | 1           | 1.248741373 |             |             |
|         | 0.9449546                                                                                                                    | 0.97858152  | 0.849907368 | 0.719967611 | 0.58841932  |             |             |             |

YCR049C YCR049C::YCR049C::molecular\_function unknown 1.239905971  
0.811977233 1.04099392 0.603044901 1.134452108 1.013806562  
0.832087468 0.763240012 1.730081851 1.271375857 0.673093987  
1.153249016 1 0.437908402  
1 0.793107856 0.677878371 0.884363631 1.325804022 0.914729452 1  
0.782823892 0.595817098 0.845239536 1.171835677 0.420444102 1  
0.654876365 0.538763635 0.977193957 0.186916344 0.723562934 0.702250436  
YGR112W YGR112W::SHY1::involved in respiration 1 1.275835358  
1.303626308 1.671556797 1.403992855 1 1.389447268 1.519615067  
1.23485934 1.427301738 1 1.568544188 1.513868286 1.368602259 1  
1.539321366 1 1.267909003 1.12134965 0.874600338  
1 1.390680156 1.396772664 1.492640257 1.180302348 1.145636667 1  
1.383237598 1.013801195 1.410915538 0.99789811 0.594339603 1  
1.380109835 1.155655017 1.335076407 0.945673958  
YJR119C YJR119C::YJR119C::molecular\_function unknown 1 1.670795186  
1.570430816 1.416749381 1.951105334 1 1.507358623 1.432694755  
1.595130155 1 1.21676212 1.180508995 1.383510963 1.849851713 1  
0.685629877 0.913333934 0.826444993 1.764635105 1 1.11676322  
1.31380176 1.455067288 1 1.154264916 1.027068697 1.143754709  
1.189266887 1.193946178 1 1.118908878 0.993042383 1.012409128  
1.954098723 1.024323611 1 0.88717001 0.786789044 1.003581335  
1.172605138 0.937164091 0.98770389  
YGR114C YGR114C::YGR114C::molecular\_function unknown 1 0.76875589  
1.07584063 1.231754665 1.20964101 1 1.138497023 1.157322547  
1.130435038 0.822190134 1 1.129764059 1.238946341 0.729595939  
1.220333086 1 0.961714474 0.771739441 0.39419925 1  
0.512821188 0.518538707 0.409140098 0.118970867 1 0.457917341  
0.711098738 0.571723071 0.477874631 1 1.272511569 0.867325592  
1.35267828 2.281710274 0.989019469 1 0.973672089 1.10251405  
0.984484776 1.10922046 0.746031646  
YJR121W "YJR121W::ATP2::F(1)F(0)-ATPase complex beta subunit, mitochondrial"  
1 1.48816327 1.085575936 1.372472592 1.035736999 1 1.688440575  
1.755391757 0.798362573 1.009037627 1 1.376281836 1.212409403  
0.915900604 0.803029448 1 2.63222567 1.94007932 2.3465683  
1.351560727 1 0.589743488 0.33082717 0.268197153 0.64326123 1  
1.006160023 0.789314809 1.057173482 1.169063196 0.823147881 1  
0.843808558 0.476097734 0.468676484 0.487734286 0.290688012 1  
1.101146382 0.68861504 0.695532895 0.879733151 1.231611398 0.83446968  
YGR116W YGR116W::SPT6::may be involved in transcription elongation by  
mediating interactions between RNA polymerase II and chromatin 1  
1.256700751 1.233667805 1.462285082 1.508984086 1 1.243618412  
1.261542545 1.167290438 1.300176475 1 0.977174636 1.176183013  
1.139747112 0.926062424 0.471189563 0.736995613 0.716530817 1  
1.320539829 1.220300941 1 0.862685421 0.913503963  
0.882354118 0.787711219 0.690011092 1 1.244101503 0.871832793  
1.204372458 1.341156843 1.065663948 1 1.003006777 0.884913606  
0.865862929 0.956163944 0.777218611 1.489436402  
YJR123W "YJR123W::RPS5::ribosomal small subunit protein homologous to  
mammalian S5 (has approx. 70% identity with human, rat and hydrozoan S5). It is  
the least basic of the non-acidic ribosomal proteins. It is phosphorylated in  
yeast." 1 1.170073269 1.043590708 0.837264665 1.156947186 1  
0.96171234 0.879920998 1.003692855 1.043001561 1 0.854890709  
0.760252985 0.656547241 0.791861138 1 0.859199924 0.439745345  
0.286950567 0.617321391 1 1.359093055 0.375740431 0.435141197 1  
1.216092218 1.015551495 1.412277211 1.643006181 1.633573571 1  
1.263195823 1.26486323 0.702903931 0.530705949 0.693377748 1  
1.064467012 0.840457329 0.885446345 1.301579536 0.961684556 1.330948463

YGR130C YGR130C::YGR130C::molecular\_function unknown 1 0.800953471  
0.926002829 1.191931069 1.022213099 1 1.15015465 1.155614357  
0.825112418 0.891992472 1 1.128576247 1.383433934 0.885300575  
1.191150168 1 2.305725411 2.119749668 1.983049574 1.107425909 1  
1.582725703 1.064566667 1.277539766 1 1.030613056 1.465980342  
0.916938883 0.73181968 0.884860177 1 1.371729232 1.210399211  
1.725356444 0.995714997 0.887862756 1 1.53127788 1.337842842  
0.930780183 1.222695579 1.538576485 0.915902707  
YJR125C YJR125C::ENT3::epsin N-terminal homology-containing protein 1  
0.974491967 1.379203791 1.271634372 1.36225098 1 1.17171032  
1.253661474 1.313069617 1.146593533 1 0.988795412 1.574482245  
1.782616291 1.338191357 1 1.860206258 1.647277857 1.468089189  
1.79601177 1 2.197913631 2.283084092 2.40408343 2.001221325 1  
0.990826892 1.409173281 1.292050151 0.999718311 1.014403315 1  
1.219270855 1.44403134 1.072965565 1.17823193 0.829360152 1  
1.190034423 1.074392349 1.019670615 0.966940305 0.982839824 1.319565341  
YGR132C YGR132C::PHB1::antiproliferative protein involved in determination  
of replicative life span 1 0.912567688 1.050659901 1.172985836  
1.221829701 1 0.993187602 1.165538408 1.290889042 1.13221084 1  
0.922719873 1.116571629 1.056260304 1.112049223 1 1.577442509  
1.363457131 1.371716039 1.815940333 1 1.546770552 1.336517449  
1.696023608 1.315344882 1 1.266787052 1.439474576 1.363693792  
1.052594545 1.07725715 1 1.348805879 1.816341161 1.455807486  
0.835441659 1.4075099 1 1.511496105 1.457840878 0.909068821  
1.147271085 1.566298088 1.004340689  
YGR134W YGR134W::CAF130::CCR4 Associated Factor 130 kDa 1 1.266477729  
1.219934726 1.49092631 1.173954414 1 1.328859464 1.249640555  
1.106898941 1.15476505 1 1.297557042 1.139690889 0.960105465  
1.165382358 1 0.887451784 1.144142532 0.829821951 1.236987447 1  
0.71359113 0.745760076 0.701908768 0.440402193 1 1.093408916  
0.81206171 0.761063855 0.977884064 1.0229285 1 0.968412077  
0.707112343 0.939386798 0.650757492 1.016846293 1 1.037254495  
1.035721076 0.877297341 1.437061847 1.036669882 0.83446968  
YGR136W YGR136W::LSB1::LAs17 Binding protein 1 1.033115854  
1.261091662 0.887334424 1.032880999 1 1.18517675 1.215065326  
0.966357705 1 1.106169491 1.403375033 1.57303483 0.977250099 1  
1.946136233 1.729281971 1.778195682 2.704379687 1 1.5903899  
1.041427911 1.536664941 1.886508707 1 1.319053833 1.564926401  
1.473210077 1.084484402 1.067153107 1 1.251706339 1.234329399  
1.337346291 1.273096478 0.904482801 1 1.043076806 1.122832396  
0.884150016 0.820168425 0.813086451 1.147943055  
YCR051W YCR051W::YCR051W::molecular\_function unknown 1 1.056172772  
1.012879404 0.621866869 0.409066965 1 0.779348599 0.774098165  
0.912351701 0.846785207 1 1.019975447 0.792904369 0.869983194  
0.890891114 1 0.867993929 0.547558509 0.426090317 0.817491428 1  
1.497693273 1.106601104 0.694131583 0.98863952 1 0.978419968  
0.746001714 0.921957728 1.102538068 1.043337004 1 0.79970514  
0.721992352 0.696469774 0.945614137 0.958670457 1 0.888250941  
0.609936264 0.9031701 0.585945861 0.570089266 0.849355305  
YCR053w YCR053w::THR4::threonine synthase 1.13894049 0.99646575  
0.811774008 0.703878693 1.058176288 0.98524867 0.702527707  
1.115209614 1.021754644 0.904470071 0.73913669 1 0.687009898  
0.498182402 0.389154767 0.325333281 1 0.508439242 0.47354261  
0.661696708 1 0.928526513 0.750861201 0.768199504 0.710415033 1  
0.882459456 0.912187444 1.006355623 0.768724888 0.893531249 1  
0.763301372 0.928181513 0.927901002 0.749594249 0.895418233 0.924658939

YCR055C YCR055C 1 0.820702157 0.63024228 0.765739158 0.659816532 1  
0.625752079 0.578103504 0.730575163 0.950914579 1 0.365050928  
0.270827303 0.277837937 0.832911074 1 0.241988566 0.124588625  
0.280350471 0.43504421 1 0.219821938 0.195532984 0.240044712  
0.627393741 1 0.718377057 0.481806951 0.570120081 0.945645048  
0.698928272 1 0.486397306 0.603725546 0.3069974 0.663804034  
1.010605351 1 0.464311013 0.592792986 0.836858644 0.773411298  
0.483761054 0.784559128  
YCR057c YCR057c::PWP2::part of small (ribosomal) subunit (SSU) processosome  
(contains U3 snoRNA); Eight WD-repeats with homology with G protein beta  
subunits flanked by nonhomologous N-terminal and C-terminal extensions 1  
0.668815879 0.406381917 0.349340543 1 0.683453121 0.606656861  
0.499438941 0.576442768 1 0.319364356 0.264724257 0.123818318  
0.755330167 1  
0.709742115 0.453339844 0.716590166 1.162731536 1.049162548 1  
0.532068588 0.417396411 0.393727969 0.688010423 0.474370815 1  
0.487313766 0.370485048 0.867017731 0.44073173 0.427421971 0.572658082  
YJR139C YJR139C::HOM6::catalyzes third step in common pathway for methionine  
and threonine biosynthesis 1 1.367286956 1.043085614 1.099439065  
1.041062581 1 1.054603014 0.962613771 1.202269461 1.186515067 1  
1.216386462 1.033238268 1.193976941 1.04526912 1 1.554323863  
1.119847618 1.272619613 1.26204765 1 1.125080559 0.819629025  
0.844442028 0.908730144 1 1.223386609 1.305391918 1.582889194  
1.608800551 1.040295422 1 1.071795086 1.068055714 0.868864255  
0.497154593 0.544113679 1 0.881337477 0.963929701 0.770708643  
0.943686669 0.71762435 1.030609488  
YCR071C YCR071C::IMG2::required for integrity of mitochondrial genome 1  
0.926438864 1.190521313 1.16515303 1 0.801929546 0.843969667  
1.092096795 1.166739691 1 0.929126785 1.056299569 1.826435061  
0.955355698 1 1.002231306 0.738766338 1.094179647 1  
1.244132024 1.868695688 1.715770093 0.98715688 1 0.945660722  
1.224646086 0.754881004 0.677210947 1.00634016 1 1.175786513  
1.70971741 1.27746422 1.386155489 2.013724148 1 1.112022179  
1.192951192 1.01930095 0.82804658 1.440426982 1.282789189  
YJR141W YJR141W::YJR141W::molecular\_function unknown 1 1.192028801  
1.010020761 1.396721468 1.94599112 1 1.04882584 1.018051649  
1.597013031 1.536537 1 0.965147936 1.006267294 1.007782722  
1.354144595 0.437436519 0.568078365 1.02322248 1  
0.987054274 2.061079828 1.208949926 1 0.749619633 0.863140178  
0.791496455 0.846017328 1.210219223 1 0.874838344 1.250566366  
0.677032653 0.886242555 1 1.305946083 1.086223914 0.873038639  
1.285108597 1.123911047 1.063007524  
YCR073C "YCR073C::SSK22::functionally redundant with, and homologous to,  
SSK2" 1.127858903 0.793756176 0.793943849 0.851141795  
0.789736638 0.817512639 0.862362071 0.843942386 0.752036814  
0.8892787 0.914375741 1  
1 0.929979193 0.90389996 0.928136424 0.981054691 1.029827013 1  
0.743999875 0.85889557 0.947131855 0.905898977 0.910333158 1  
0.838073821 0.906113366 0.914591446 0.679874779 0.801616491 0.991206341  
YJR143C YJR143C::PMT4::Transfers mannose residues from dolichyl phosphate-D-  
mannose to specific serine/threonine residues of proteins in the secretory  
pathway 1 1.216156863 0.658368605 1.063405244 0.657610405 1  
1.189238282 1.092597413 0.604730338 0.668933708 1 1.146608217  
0.744342147 0.343709222 0.728656375 1 1.105552131 0.60904226  
0.718486761 0.453896052 1 0.310866145 0.186378997 0.105724397  
0.254878726 1 0.850544257 0.632070618 0.94037044 1.338047182  
0.706025504 1 0.776926183 0.610392265 0.531757812 0.541581834

0.251482107 1 0.890594866 0.618395338 0.797977396 0.651570852  
 0.675698752 0.645334878  
 YCR075c YCR075c::ERS1::Suppressor of ERD1 mutation; seven transmembrane  
 domain protein 1 1.541966844 1.320716123 1.14228734 1.225983657 1  
 1.211138434 1.065408269 1.263896427 1 1.140156927 1.321390335  
 1.665638084 1.187370907 1 1.079994721 0.968947748 2.725736143  
 1.523672926 1 1.729815613 3.489701665 3.17221247 1  
 1.219351151 1.34330844 1.26609546 1.305662102 1 0.998877157  
 1.181122534 1.206966795 0.945796514 0.92459114 1 1.171470822  
 1.001511721 1.323539131 0.723883132 1.444223689 1.063007524  
 YGR138C YGR138C::TPO2::Polyamine transport protein 1 1.188952886  
 0.818874302 1.129128762 0.995316303 1 1.185751213 1.168513364  
 0.779628974 1.112444737 1 0.774540884 0.630681385 0.653156659  
 1.024187062 1.651090229 1.017807054 0.984714112 1  
 0.702630399 0.772043099 0.33552476 1 1.177105346 0.925831121  
 1.231421173 1.45377282 0.887171416 1 0.740960036 0.55759065  
 0.691559653 0.821938956 0.511038305 1 1.266231576 0.720719233  
 0.630665957 0.874923991 0.881800146 0.760917271  
 YJR145C YJR145C::RPS4A::Homology to rat S4 and human S4 1 1.112267089  
 0.973625522 0.791616561 1.185259724 1 0.986278835 0.842590249  
 0.960610007 1.002668618 1 0.81249715 0.747886558 0.51419043  
 0.817679236 1 1.079806735 0.509815573 0.283546095 0.739895151 1  
 1.26242809 0.483750746 0.31167851 0.604496267 1 1.399272496  
 0.936126624 1.440500135 1.472426423 1.423539058 1 1.204969189  
 1.58071552 0.675469198 0.619157859 1.009533927 1 1.528671362  
 1.478859769 1.089729401 1.052905795 1.136559933  
 YCR077C YCR077C::PAT1::Necessary for accurate chromosome transmission during  
 cell; Involved in mRNA turnover 1 1.172221995 1.080475818 1.305116464  
 0.728796008 1 1.243440085 1.357251501 0.910277037 1  
 1.314202173 1.304703461 0.727703311 0.988416548 1 1.498442169  
 0.522788201 0.957322967 0.457293626 0.752561362 1  
 0.84089202 0.793787997 0.760770157 0.884004669 0.623909492 1  
 0.78660598 0.672487287 0.665161008 0.625432289 0.515491261 1  
 0.907098978 0.781166694 0.95156592 0.595488299 0.795309753 0.633076143  
 YGR140W "YGR140W::CBF2::110 kd component (Cbf3a) of the multisubunit 'Cbf3'  
 kinetochore protein complex, which binds to the CDE III element of centromeres"  
 0.915609695  
 0.733024232 0.935021832  
 1.278212325 0.961830374 1  
 0.929081151 0.977075114 0.770345179 1.174071418 1 1.189271114  
 1.230911349 0.918529598  
 YJR147W YJR147W::HMS2::High-copy mep2 suppressor 1 0.938408347  
 0.639855028 0.620372139 0.369874411 1 0.808707834 0.761609686  
 0.47765406 0.485566692 1 1.037628318 0.661846446 0.4010259  
 0.468976406 1 0.72739894 0.51587938 0.816113345 0.651715522 1  
 0.651731542 1.330847935 0.761885052 1 0.898382302 0.757185153  
 1.082854018 0.672852306 1 0.54613539 0.526557083 0.523611117  
 0.640959794 0.366301764 1 0.618112446 0.526768171 0.761875326  
 0.557958512 0.425209041 0.912400256  
 YCR080W YCR080W 0.943165809 0.83817005 1.308230772 0.810586341  
 1.148980873 1.223597507 0.940735772 0.709961915 1.243006614  
 1.240702018 0.655565514 1.243316011 1 0.784226852 1  
 1.08462131 1 0.931941672 1.148262062 1.121949609  
 1.028864364 0.964444649 1 0.879307584 0.483120591 0.978251907  
 1.179570868 0.771531427 1.24497306 0.104821326  
 1.222309771 0.668101122

|         |                                                                |                     |               |                                    |
|---------|----------------------------------------------------------------|---------------------|---------------|------------------------------------|
| YGR154C | YGR154C::YGR154C::molecular_function                           | unknown             | 1             | 1.289242651                        |
|         | 1.289184478                                                    | 1.337403556         | 1.274591827   | 1 1.381667994 1.223308112          |
|         | 1.262640424                                                    | 1.405862948         | 1 1.497204836 | 1.540272337 1.301474594            |
|         | 1.133846797                                                    | 1.170840743         | 1.085589093   | 1.193271147                        |
|         | 1                                                              | 0.968950884         | 1.164245922   | 1.150658639 1.018686064            |
|         | 1.173103219                                                    | 1 0.773277375       | 0.924836665   | 1.312184405 1.137562279            |
|         | 0.939435347                                                    | 1 1.371447474       | 0.919541577   | 1.263764669 1.145539367            |
|         | 1.552237653                                                    | 0.977196433         |               |                                    |
| YJR149W | YJR149W::YJR149W::molecular_function                           | unknown             | 1             | 0.907755101                        |
|         | 1.146809906                                                    | 0.955812467         | 1 1.18462888  | 1.169158836 0.988824314 1          |
|         | 0.904013395                                                    | 1.121436608         | 1.522049965   | 1.035912389 1 1.448848573          |
|         | 1.656985227                                                    | 1.988552962         | 1 2.119348968 | 5.10027678 3.949367493 1           |
|         | 0.904542973                                                    | 1.302133046         | 2.185025853   | 1.304794526 1.331728925 1          |
|         | 0.851159174                                                    | 1.080565791         | 1.309301958   | 1.514743174 1.233121919 1          |
|         | 0.994051992                                                    | 1.294626446         | 1.580659414   | 1.304265995 1.54223255 0.850230918 |
| YCR082W | YCR082W::YCR082W::molecular_function                           | unknown             | 1             | 1.054371931                        |
|         | 1.336250882                                                    | 1.406417071         | 1 0.978502259 | 0.903251457                        |
|         | 1.325810208                                                    | 1 1.129670817       | 1.536016951   | 2.160108544 1.402288792 1          |
|         | 1.184592853                                                    | 1.304178273         | 2.045165471   | 1 1.800694051 2.382562703          |
|         | 2.54386658                                                     | 1.702269851         | 1 1.228323671 | 1.376629402 1.355421318            |
|         | 0.982279459                                                    | 1.203930543         | 1 1.036380215 | 1.448483677 1.285420823            |
|         | 1.206392322                                                    | 1.574695041         | 1 0.871642719 | 1.097523043 1.04534131             |
|         | 1.228488753                                                    | 1.022076667         | 1.369475945   |                                    |
| YGR156W | YGR156W::PTI1::Ptalp                                           | Interacting protein | 1             | 1.089304687                        |
|         | 1.023748357                                                    | 0.767612903         | 0.857545331   | 1 0.90891326 0.855919219           |
|         | 0.964223823                                                    | 0.810326839         | 1 0.826716757 | 0.969288783 1.026405295            |
|         | 0.631725029                                                    | 1 0.835449824       | 0.842663836   | 0.906306165 1.077524942 1          |
|         | 1.189215176                                                    | 1.450180598         | 1.079047172   | 1 0.847130014 1.127755539          |
|         | 1.087233826                                                    | 0.965882063         | 0.926060072   | 1 0.839595302 0.867577301          |
|         | 0.996716143                                                    | 0.779153308         | 0.912707723   | 1 0.861111207 0.989730638          |
|         | 0.670814419                                                    | 0.803382437         | 1.050349349   | 1.23375425                         |
| YKL001C | YKL001C::MET14::adenylylsulfate                                | kinase              | 1             | 1.179895319                        |
|         | 1.835460717                                                    | 1.168311975         | 1.243103966   | 1 0.837464293 0.948766237          |
|         | 1.977538025                                                    | 1.627675575         | 1 0.855635321 | 2.166327016 1.61791563             |
|         | 0.839029803                                                    | 1 1.233633699       | 0.468761914   | 0.549836697 1.465284947 1          |
|         | 1.694187929                                                    | 1.102160441         | 1.084252793   | 1.80120859 1 0.904542973           |
|         | 0.64733189                                                     | 0.461875389         | 0.769763215   | 0.852875896 1 2.128734406          |
|         | 1.651543631                                                    | 0.601288293         | 0.78120306    | 3.631207817 1 1.853419753          |
|         | 1.3447094                                                      | 0.97306347          | 1.908454502   | 1.189097921 1.686451823            |
| YGR158C | YGR158C::MTR3::Involved in mRNA                                | transport           | 1             | 1.201295381                        |
|         | 1.085935828                                                    | 1.001568501         | 1.310206933   | 1 1.143050645 0.988484183          |
|         | 1.094899924                                                    | 1.24531967          | 1 0.775726682 | 0.661651072 0.884562062            |
|         | 0.964406084                                                    | 1 0.497092552       | 0.602155996   | 0.73557758 1                       |
|         | 0.625792599                                                    | 0.685901174         | 0.586777708   | 1 1.001426684 0.759434401          |
|         | 0.757692733                                                    | 0.838476797         | 0.956806629   | 1 1.218694504 1.022094612          |
|         | 0.819843487                                                    | 0.93443606          | 1.281080343   | 1 0.918027886 0.895477116          |
|         | 1.082305106                                                    | 0.734213197         | 1.321316567   |                                    |
| YKL003C | YKL003C::MRP17::Mitochondrial                                  | ribosomal protein   | MRP17         | 1                                  |
|         | 1.02443766                                                     | 1.558415064         | 1.121982621   | 2.054353136 1 1.141524143          |
|         | 1.248238495                                                    | 1.975687687         | 1.757800046   | 1 1.175916672 1.209840915          |
|         | 1.818441921                                                    | 1.290507415         | 1 1.397822491 | 1.195651964 1.900825928 1          |
|         | 1.832019657                                                    | 2.789944009         | 1.792178156   | 1.446399225 1 0.998286318          |
|         | 1.212949394                                                    | 0.80220279          | 0.913446062   | 1 1.188798359 1.735242136          |
|         | 1.2101244                                                      | 1.11261222          | 2.179703803   | 1 1.26607537 1.720822864           |
|         | 1.048321824                                                    | 1.807451053         | 1.80008447    | 1.409754653                        |
| YGR160W | YGR160W::FYV13::Function required for Yeast Viability on toxin | exposure            | 1             | 0.933444496                        |
|         | 1                                                              | 1.15098393          | 0.491466701   | 0.9774189 1                        |



|             |                                                                |             |             |             |             |
|-------------|----------------------------------------------------------------|-------------|-------------|-------------|-------------|
| 0.657394744 | 0.742931132                                                    | 1.06747317  | 1           | 0.362691487 | 0.181587187 |
| 0.156444898 | 1.015366501                                                    | 1           | 0.199388395 | 0.097676458 | 0.082927462 |
| 0.260625737 | 1                                                              | 0.327864642 | 0.092142998 | 0.101607771 | 0.556201856 |
| 0.562398939 | 0.278666579                                                    | 0.645062788 | 1.312985937 | 0.655178217 | 1           |
| 0.479187284 | 0.237325421                                                    | 0.223600842 | 0.679861067 | 0.359477069 | 1           |
| 0.453275122 | 0.228776085                                                    | 0.622616094 | 0.697063095 | 0.157602654 | 0.634827421 |
| YKL005C     | YKL005C::YKL005C::molecular_function                           | unknown     | 1           | 0.782962364 |             |
| 0.876915291 | 0.993387261                                                    | 0.86487579  | 1           | 0.966371209 | 0.945816964 |
| 1.001614177 | 0.950999998                                                    | 1           | 0.692778832 | 0.891533432 | 0.791456278 |
| 0.987291705 | 1                                                              | 0.768348524 | 0.526343449 | 0.878679358 | 1.02329671  |
| 1.17394011  | 1.193714005                                                    | 1.158273759 | 0.857543758 | 1           | 0.845166922 |
| 0.927721877 | 1.014853512                                                    | 0.9183446   | 1.066663353 | 1           | 0.929533138 |
| 0.854237621 | 0.829738917                                                    | 0.984641376 | 0.983587727 | 1           | 0.795977796 |
| 1.046055984 | 1.128152542                                                    | 1.169691015 | 1.077954156 | 0.877375225 |             |
| YKL006W     | YKL006W::RPL14A::Homology to mammalian L14                     |             | 1           | 1.575969891 |             |
| 1.618113511 | 0.84236239                                                     | 2.003073957 | 1           | 1.183570845 | 1.092039303 |
| 1.456530988 | 1.330293797                                                    | 1           | 1.01330864  | 1.057029722 | 0.952211614 |
| 0.857940266 | 1                                                              | 0.996562155 | 0.433181649 | 0.254625271 | 0.777976534 |
| 1.277956096 | 1.097755166                                                    | 0.492877656 | 0.656874036 | 1           | 0.979333409 |
| 0.698153131 | 0.562999315                                                    | 0.932650374 | 1.007629357 | 1           | 1.127291426 |
| 1.954407364 | 1.046620565                                                    | 0.603826615 | 1.761557188 | 1           | 0.843003099 |
| 1.249531968 | 0.578975133                                                    | 1.93548569  | 0.717363839 | 1.541973897 |             |
| YGR162W     | YGR162W::TIF4631::also called eIF4 (eIF-4) gamma               |             | 1           |             |             |
| 0.855796551 | 0.720700839                                                    | 1.159629832 | 0.704284976 | 1           | 1.073506655 |
| 1.053282287 | 0.768358905                                                    | 0.722679292 | 1           | 0.789328769 | 0.679154463 |
| 0.320167002 | 0.936323223                                                    | 1           | 0.548775911 | 0.409436569 | 0.29623198  |
| 0.384019568 | 0.192571035                                                    |             |             | 0.611715911 |             |
|             |                                                                |             |             | 2.6535188   |             |
| YGR162W     | YGR162W::TIF4631::also called eIF4 (eIF-4) gamma               |             |             |             |             |
|             |                                                                |             |             | 1           | 0.841005535 |
| 0.565742553 | 0.616104745                                                    | 0.787200698 | 0.796840736 | 1           | 0.9407483   |
| 0.576364832 | 0.503246769                                                    | 0.759928328 | 0.44728852  | 1           | 0.698675413 |
| 0.537128864 | 0.646551873                                                    | 0.752085767 | 0.516314715 |             |             |
| YGR164W     | YGR164W::YGR164W::molecular_function                           | unknown     | 1           | 1.197739224 |             |
| 1.430568468 | 1.239986929                                                    | 1.736222669 | 1           | 1.096114767 | 1.166686761 |
| 1.460243871 | 1.420067464                                                    | 1           | 1.04007784  | 1.136590658 | 1.535465857 |
| 1.202853754 | 1                                                              | 0.835942568 | 0.972767392 | 0.990209464 | 1           |
| 1.670598932 |                                                                | 0.489791956 | 1           | 1.000166287 | 1.003128734 |
| 0.668642738 | 0.956742494                                                    | 1           | 1.111539527 | 1.467707171 | 1.053397902 |
| 0.875928835 | 1.730224235                                                    | 1           | 0.892500823 | 1.088703758 | 0.818993428 |
| 1.502105629 | 0.831166417                                                    | 1.000838238 |             |             |             |
| YGR178C     | YGR178C::PBP1::Poly(A)-binding protein binding protein         |             |             |             | 1           |
| 0.780181921 | 0.867486058                                                    | 1.094678646 | 0.716910303 | 1           | 1.135012205 |
| 1.075329448 | 0.714533999                                                    | 0.751837413 | 1           | 0.836979148 | 1.008050513 |
| 0.666598233 | 1.043185056                                                    | 1           | 1.115963755 | 0.835597154 | 0.813063275 |
| 0.882301796 | 1                                                              | 1.062929343 | 0.639260389 | 0.68264543  | 1.100648014 |
| 0.795015113 | 0.812042293                                                    | 0.972558253 | 1.026339969 | 0.517280419 | 1           |
| 1.196833442 | 0.565496873                                                    | 0.99622211  | 0.905670596 | 0.431298204 | 1           |
| 0.855120028 | 0.573932291                                                    | 0.829908458 | 0.551238636 | 0.724438544 |             |
| YGR180C     | "YGR180C::RNR4::ribonucleotide reductase, small subunit (alt)" |             |             |             | 1           |
| 1.143005199 | 0.852514226                                                    | 1.198488052 | 1.026409139 | 1           | 1.053111984 |
| 1.12474572  | 0.77208394                                                     | 1.068503437 | 1           | 0.999963179 | 0.924519278 |
| 0.738098517 | 1.288763193                                                    | 1           | 1.194933508 | 0.772071849 | 0.679578492 |
| 0.997290565 | 1                                                              | 0.858837619 | 0.309129582 | 0.256417584 | 0.89605595  |
| 0.866363038 | 0.790208982                                                    | 0.670274397 | 1.38825098  | 1.298963505 | 1           |

1.622634556 1.15555729 1.64502915 2.32483115 0.442481502 1  
1.463687301 0.909175972 0.759696779 0.890412381 0.90073856 0.907146476  
YCR096c "YCR096c::HMRA2::Silenced copy of A2, which encodes a protein of  
unknown function." 1 0.733334806 1.231580599 0.896470988 1.354961309 1  
0.715251439 0.719066885 1.279551894 1.071064551 1 0.972426911  
1.375963753 1.759672042 1.094141789 1 1.432149908 0.891456784  
1.860974323 1 1.389490611 3.118119085 2.900601335 1.178893148 1  
0.738002411 0.956319473 0.593107083 0.523082826 0.861363095 1  
1.046546821 1.286980795 1.332828281 2.009280597 1 1.233535148  
1.395743832 1.510399933 1.131729202 2.864797119 1.196977994  
YCR097wb YCR097wb 0.953016124 0.988493991 0.855618919  
0.864459776 0.914401158 1.021170307 0.917324341  
0.960388215 1 1.628604366 1.137537211 1.042952858 1.798078501 1  
2.00944628 3.158404957 2.943323309 1.940452131 0.878770948  
0.884505384 0.885045563 0.969555 0.874580984 1 1.291646002  
1.994055426 1.509279537 2.173425409 2.781010781 1 1.146542574  
1.291471966 2.001709239 1.969025551 0.788061579  
YCR099C YCR099C::YCR099C::molecular\_function unknown 1 1.525689066  
1.426532633 1.277670878 1 1.451027052 1.634323212  
1.210185408 1 1.808190321 1.828061916 1.129496792 1.430158785 1  
0.775726951 0.606042166 1.866322185 1.024262589 1 0.739184905  
2.357393917 1.093394225 0.732930286 1 1.133134473 1.23745653  
1.010212726 1.019277614 1.121068956 1 1.004240845 1.129205207  
1.277780042 0.995213026 0.844276089 1 0.988741261 1.227100033  
1.070492176 0.492147075 1.063449681 0.711882332  
YCR101C YCR101C::YCR101C::molecular\_function unknown 1.033049777  
0.971411737 1.125972988 1.09691959 1.108267376  
0.726069267 1.579377851 1.775906864 0.919661443 1.111152506 1  
0.88305343 1.184866583 1 1.000184591 1.456606256  
0.560970879 0.96664807 0.856893326 0.918386313 0.969555  
1.036292323 1 1.023824732 0.613819379 0.933251007 0.798886338  
0.784590314 1 0.949104246 1.124782301 1.370320328  
0.764419775  
YKL008C YKL008C::LAC1::Longevity-assurance gene 1 cognate (LAG1 cognate) 1  
1.317501264 0.811099487 0.855401785 0.801427736 1 1.074344138  
0.847644806 0.793809358 0.707014619 1 0.996076165 0.683320963  
0.556163472 0.873631549 1 1.392735827 0.825365179 1.085657714  
1.105270507 1 0.870881203 0.431313163 0.48671302 0.71894345 1  
0.914027597 0.751615115 1.002980512 1.478823798 1.464494307 1  
0.895840307 0.828719987 0.625701678 0.580435541 0.656487415 1  
0.90843048 0.735800169 0.859079792 1.038336617 0.846589297 1.071763756  
YCR103C YCR103C 1.013349218 0.818810121 1.023103614 0.650035391  
0.845088161 0.809507521 0.780413202 0.826430337 1.410589388  
1.0841599 1.117026481 0.724782587 1  
0.988223252 1 1.060757029 1.006829913 1.509716506  
1.268560417 1.199971767 1 1.283488418 1.510640882 1.103405353  
0.90965447 1 1.148175235 0.83773838 1.110597898 0.152824339  
0.882215976 0.818708442  
YKL010C YKL010C::UFD4::Ubiquitin Fusion Degradation 1 1.324082281  
1.14274148 1.175609092 1.047160639 1 1.329616677 1.398083364  
1.064845916 0.967478496 1 1.347417662 1.333040477 0.95514888  
1.056122772 1 1.329314622 1.219269642 1.018803168 1.021898371 1  
0.727315836 0.754204763 0.698951628 0.810743995 1 0.829391914  
0.969332937 0.960156305 0.882695148 0.921774306 1 1.133925456  
0.876466833 0.619451964 0.879291827 0.64445217 1 1.168411834  
0.907036222 1.047124347 0.881289296 0.865754504 0.975445103

YCR105W YCR105W::YCR105W::molecular\_function unknown 1 1.1853758  
1.012242882 1.17612512 0.938726126 1 1.181001142 1.167924715  
1.047793969 1.003488725 1 1.624334238 1.157731417 1.170626595 1  
1.044829371 1  
0.996653159 1.088932143 0.975234839 0.943389502 1.007941425 1  
0.927601844 1.286333556 1.24657262 1.149924818 1.5772107 1  
0.964900479 1.330136281 1.160296473 0.980916706 1.11847048 1.154072396  
YKL024C YKL024C::URA6::uridine-monophosphate kinase (uridylylate kinase) 1  
1.441998978 1.614736434 1.00082914 1.699278954 1 1.10057736  
1.099522787 1.524016437 1.546072416 1 1.225374009 1.269693869  
1.314780205 1.341707067 1 1.298346066 0.890956893 0.857320609  
1.336806792 1 1.552352897 1.795878813 1.332807973 1.166102301 1  
1.100834759 1.23982267 1.145453482 1.238798001 1.139143003 1  
0.906956268 1.612223099 0.92381966 1.211769368 1.723201511 1  
0.967662164 1.121568181 1.022533192 1.353375137 0.730275599 1.205734225  
YCRX12W YCRX12W 1.109389615 0.841586528 0.772406516  
1.0388046 0.969871324 0.86256201 0.836342565 0.81139031  
0.67776826 1.13954323 1 0.55614506  
1 0.796553523 0.676343586 0.849652606 0.907802628  
0.982852139 0.726564525 0.813036836 0.927403788 1.136919529 1  
0.717129906 0.73301871 1.076390929 1.06126488 0.710131055  
YGR182C YGR182C::YGR182C::molecular\_function unknown 1 1.313993487  
1.726783111 0.896438581 1.796773042 1 1.042083396 1.138292176  
1.509903213 1.488364461 1 0.901923776 0.992632215 2.177654065  
0.94499862 1 1.333101198 0.74346284 1.097186558 2.405429517 1  
1.938093947 3.09128081 3.027295483 1.799887607 1 0.516505364  
0.450312253 0.280605608 0.348265184 0.756251941 1 0.650899853  
0.751974546 0.731576217 0.736415371 1.923653878 1 0.893548968  
0.792985184 0.958840132 2.448096524 2.474030224 2.330911036  
YKL026C YKL026C::GPX1::Glutathione peroxidase paralogue 1 1.643376207  
2.305475841 3.284107804 1 1.963761322 2.853093146 3.42186553  
3.374152111 1 1.785923296 3.41850398 6.179205212 2.548824304 1  
2.936525474 3.939069039 6.236624203 7.11892344 1 2.60578098  
5.728766302 10.48514849 3.574464332 1 1.063146714 1.280082826  
0.938951862 1.262501337 1 0.967352918 1.666040443 1.725311667  
1.683406029 1.538314808 1 1.261939191 1.538891524 1.333368112  
0.73753139 2.200296761  
YCRX14W YCRX14W 1 0.833438277 0.645740186 0.811025011 0.409479232 1  
0.835218761 0.805683322 0.507194644 0.501346044 1 1.008573848  
0.776576473 0.510311897 0.67668998 1 0.731318222 0.509822216  
0.871306224 0.62009622 1 0.687883012 0.92049952 0.628289183  
0.494611173 1 0.827463724 0.648354426 0.887873714 0.792414518 1  
1.027026185 0.778773686 0.916557601 0.936271425 0.709387035 1  
0.690287862 0.729513189 1.071882124 0.988123952 0.883504567  
YGR184C YGR184C::UBR1::Ubiquitin-protein ligase 1.04043755  
0.888278007 0.971137232 0.813901058 0.900986409  
0.972635442 0.842736769 0.823961526 1.057552197 0.888922005  
0.891625932 1.31022697 1.00489622 0.702777758 1 0.666706786  
1.127037884 1 1.162702671 1.105418689 1.017464229  
1.190284356 1.089057719 1 0.885194359 0.881847259 0.876869806  
0.813206009 0.682646108 1 1.00954455 0.803998064 0.921856139  
0.806968687 0.86179351 1.308182219  
YKL028W YKL028W::TFA1::Large subunit of transcription factor tFIIE 1  
0.855293966 0.979036924 1.796925195 0.989739776 1 1.31286841  
1.119279766 1.511178934 1.329351252 1 0.865112478 1.279102677  
1.114448661 1.406087591 1 0.975790188 2.050970264 1.652308227  
0.748482473 1 0.59006272 0.460932462 0.333405511 0.400163092 1

|             |                                                                                                                            |             |             |             |             |
|-------------|----------------------------------------------------------------------------------------------------------------------------|-------------|-------------|-------------|-------------|
| 0.994337007 | 1.099154015                                                                                                                | 0.982921293 | 1.080794094 | 1.332357145 |             |
| 0.982464471 | 0.872607651                                                                                                                | 0.648676312 | 0.974512947 | 0.743910337 | 1           |
| 1.053026063 | 0.816627663                                                                                                                | 0.944724425 | 0.898326498 | 1.084152142 | 0.800320314 |
| YCRX16C     | YCRX16C                                                                                                                    | 1.029355963 | 1.075044199 | 0.655233584 | 1.076865923 |
| 0.727647541 | 0.649143785                                                                                                                | 1.029509473 | 1.018479405 | 0.892167691 |             |
| 0.758383097 | 0.899795798                                                                                                                | 0.944724359 | 1           | 0.61263841  | 0.219207612 |
| 0.24787311  | 0.555656237                                                                                                                | 1           | 1.408373619 | 1.322997746 | 0.497422063 |
| 0.589446574 | 1.238268229                                                                                                                | 1.202043701 | 0.746630937 | 1.067480008 |             |
| 1.247761107 | 1                                                                                                                          | 0.846141846 | 0.971986023 | 0.6338641   | 0.893932664 |
| 1.860852598 | 1                                                                                                                          | 0.775138001 | 0.856269688 | 0.897851326 | 1.164329151 |
| 0.640779216 | 0.857235872                                                                                                                |             |             |             |             |
| YGR186W     | YGR186W::TFG1::Transcription factor TFIIF large subunit                                                                    |             |             |             | 1           |
| 0.706992688 | 0.89435742                                                                                                                 | 0.959309628 | 0.797417821 | 1           | 0.950831099 |
| 1.027605015 | 0.771412049                                                                                                                | 1           | 0.868345834 | 0.996622257 | 0.725593473 |
| 1.010682353 | 1                                                                                                                          | 1.214392995 | 0.946574736 | 0.870715974 | 1           |
| 0.944685628 | 0.92380901                                                                                                                 | 0.898683077 | 0.314265141 | 1           | 0.822162216 |
| 1.072658319 | 0.785547014                                                                                                                | 0.71665041  | 0.958533972 | 1           | 1.208559391 |
| 1.178573178 | 1.198827969                                                                                                                | 1.107011989 | 0.912089378 | 1           | 1.183714608 |
| 1.226448475 | 0.996888266                                                                                                                | 0.966509104 | 0.932329673 | 1.328321573 |             |
| YKL030W     | YKL030W::YKL030W::molecular_function unknown                                                                               |             |             |             | 1           |
| 0.777923344 | 0.448634783                                                                                                                | 0.48361512  | 1           | 0.688250133 | 0.652944167 |
| 0.60522026  | 0.598173407                                                                                                                | 1           | 1.225371742 | 0.696272594 | 0.670497439 |
| 0.494616473 | 1                                                                                                                          | 1.045400627 | 0.468913873 | 0.844218663 | 0.798007148 |
| 1.10568366  | 1.139357431                                                                                                                | 0.690701152 | 0.68043494  | 1           | 0.892447453 |
| 0.731749594 | 0.78904424                                                                                                                 | 1.075461741 | 1.089248846 | 1           | 0.813947103 |
| 1.108927091 | 0.508708988                                                                                                                | 1.404342764 | 3.32264841  | 1           | 0.72581322  |
| 0.969942595 | 0.79562048                                                                                                                 | 1.477678909 | 0.979372645 | 1.494690183 |             |
| YCRX18C     | YCRX18C                                                                                                                    | 1           | 0.944348994 | 0.639182874 | 0.886100653 |
| 0.985153897 | 0.608457064                                                                                                                | 0.664803994 | 1           | 1.067891065 | 0.817973778 |
| 0.586005979 | 0.713381998                                                                                                                | 1           | 1.127929792 | 0.340664367 | 0.613419553 |
| 0.236325894 |                                                                                                                            | 1           | 1.098457403 | 0.970043229 | 0.88801233  |
| 1.029491209 | 0.682629429                                                                                                                | 1           | 0.66034631  | 0.525660686 | 0.624690274 |
| 0.587463417 | 1                                                                                                                          | 0.737366285 | 0.77261439  | 0.715272528 | 1.004856691 |
| 0.729394796 |                                                                                                                            |             |             |             |             |
| YGR188C     | YGR188C::BUB1::checkpoint gene involved in permitting entry into mitosis depending upon the assembly state of microtubules |             |             |             | 1           |
| 0.955348109 | 1.088874674                                                                                                                | 1.059586961 | 1           | 1.000284081 | 0.96867925  |
| 1.072654136 | 1                                                                                                                          | 0.77210452  |             | 0.792926199 | 1.100767733 |
| 0.851008453 | 0.899187234                                                                                                                | 0.86347594  |             | 0.641456016 | 0.742497388 |
| 1           | 0.928387338                                                                                                                | 1.146589961 |             | 1.135354161 | 1.180103499 |
| 0.926940977 | 1.038014707                                                                                                                | 0.813543086 | 0.995665361 | 1.094842365 | 1           |
| 0.884897734 | 1.054799439                                                                                                                | 1.131023037 | 1.234408011 | 1.051138873 | 1.027982598 |
| YKL032C     | YKL032C::IXR1::intrastrand crosslink recognition protein                                                                   |             |             |             | 1           |
| 0.821261558 | 0.884523005                                                                                                                | 0.76624212  | 0.706667358 | 1           | 0.910537759 |
| 0.89241021  | 0.744713101                                                                                                                | 0.718072307 | 1           | 0.891369901 | 0.836667336 |
| 0.789645984 | 0.729252017                                                                                                                | 1           | 1.060952116 | 0.87235319  | 0.870436916 |
| 0.692854625 | 1                                                                                                                          | 0.961184487 | 1.194703648 | 1.055242953 | 0.868581732 |
| 0.844533151 | 0.692141528                                                                                                                | 0.723393437 | 0.683536259 | 1.000888116 | 1           |
| 0.828775939 | 1.004646106                                                                                                                | 0.658346372 | 0.801648791 | 0.828905095 | 1           |
| 0.910701188 | 1.088171111                                                                                                                | 0.920475453 | 1.313061717 | 0.988432918 | 1.533217665 |
| YGR202C     | YGR202C::PCT1::phosphorylcholine transferase; or cholinephosphate cytidyltransferase                                       |             |             |             | 1           |
| 1.134101575 | 1.12130308                                                                                                                 | 0.898521045 | 1.029133396 | 1           | 1.186676753 |
| 1.167514259 | 1.164446209                                                                                                                | 1.235840124 | 1           | 1.267793186 | 1.237919468 |
| 1.240024009 | 1                                                                                                                          | 0.953262035 |             | 1.040947409 | 0.813761756 |
| 0.939876702 | 0.883027213                                                                                                                |             | 0.834804929 | 0.987944321 | 1           |
|             |                                                                                                                            |             |             |             | 1.034075272 |

0.875749262 1.002844283 0.961763925 1.021698045 1 1.10273207  
 0.917858368 1.167395326 0.986199993 1.502459936 0.677732966  
 YKL034W YKL034W::TUL1::Transmembrane Ubiquitin Ligase 1 1.049776697  
 0.938574372 1.042495364 0.712597247 1 1.144352812 1.146916592  
 0.806551434 0.714472887 1 1.402591133 1.293540389 0.684555691  
 0.932498316 1 1.234676728 1.519936494 0.870378613 1  
 0.880564947 1.010045339 0.594768902 1 1.333446845 1.562558447  
 1.881011685 1.521599254 1.122729393 1 1.089383213 0.89557774  
 1.058028271 1.127071442 0.621755782 1 1.162096346 1.000662879  
 1.173136773 1.024149275 1.119875815 0.622568686  
 YKL048C YKL048C::ELM1::cell morphology 1 0.786069305  
 1.104931172 1.018927094 1 1.026823497 0.956719213 0.985606861 1  
 0.670408892 0.717463803 0.543647638 1.124499693 1 0.654378607  
 0.540201656 0.882984964 1 0.851792147 0.899067943 1  
 1.054609405 0.91546717 1.044518031 1.154405591 1.103935706 1  
 0.966889322 0.956324837 0.823826824 1.007055111 1.014480613 1  
 0.906474928 0.91270906 1.239737648 0.999718375 0.986828225  
 YGR204W "YGR204W::ADE3::Required for the biosynthesis of purines,  
 thymidylate, methionine, histidine, pantothenic acid and formylmethionyl-tRNA"  
 1 0.897336471 0.79805741 0.842980994 0.350048538 1 1.281368526  
 1.144328729 0.510873762 1 1.315795323 1.553835731 0.481609593  
 0.553903376 1 1.625443169 1.357416404 0.992899708 0.412694554 1  
 0.778432563 0.385420836 0.225569667 0.396108101 1 0.977017263  
 0.902642568 0.93791517 1.306321835 0.925448437 1 0.908387355  
 0.826922071 0.607431764 1.257415768 0.763235223 1 0.673232394  
 0.483005798 0.974607873 0.740102301 1.200046427 0.483344436  
 YKL050C YKL050C::YKL050C::molecular\_function unknown 1 1.051261348  
 1.165999827 1.361630311 1.093355995 1 1.313756707 1.384887847  
 1.298014341 1.125302671 1 1.014320205 1.068571507 1.083834507  
 1.307613835 1 0.195580053  
 1 0.726790006 0.838785974 0.978051959 1.016650835 0.971832847 1  
 0.83037905 0.849927467 0.86186261 1.005867632 0.762500921 1  
 0.787581902 0.774848376 1.051046283 0.90904081 0.996250479 0.753912265  
 YGR206W YGR206W::YGR206W::molecular\_function unknown 1 1.048943162  
 1.759757545 1.148979033 2.060628566 1 1.18576671 1.913538335  
 1.567894914 1 1.207015232 1.463428826 1.958322021 1.319498869 1  
 1.625332745 1.275273607 1.092665123 1.782024244 1 1.41291626  
 2.053125025 1.560320787 1.033158031 1 0.907937168 1.067615031  
 0.631355926 0.682611851 1.005001727 1 1.133934511 1.566537712  
 1.492919733 1.611808078 2.253988879 1 1.134243304 1.543521163  
 1.361394599 2.008620508 1.49445487 1.482431396  
 YGR208W YGR208W::SER2::phosphoserine phosphatase 1 0.837075072  
 0.940981378 0.945588324 1.046255239 1 0.955780375 0.941657101  
 0.944460463 1.026184353 1 0.919018877 1.107848488 0.817100794  
 0.884872764 1 1.426653328 1.113887243 0.782229493 0.737162384 1  
 1.435303679 0.757701702 0.458091978 0.910284569 1 1.061480339  
 1.186358682 1.344721141 1.199066854 1.12470145 1 1.112208165  
 1.241933734 1.255536744 1.106897875 1.410008643 1 1.186174247  
 1.324167532 1.455369096 1.167693637 1.523767452  
 YGR210C YGR210C::YGR210C::molecular\_function unknown 1 0.843751518  
 0.867696793 0.643321795 0.487527276 1 0.818984417 0.74820568  
 0.728162394 0.694375449 1 0.813083339 0.68175289 0.4875984  
 0.642964611 1 0.852553648 0.426444984 0.518533939 0.850365096 1  
 1.460933953 1.003532586 0.6831769 1.024417453 1 1.042724671  
 1.02520946 1.266046352 1.233677819 0.974420794 1 1.036610695  
 0.772718516 0.645341169 0.72448102 0.807415591 1 0.680007999  
 0.749874935 0.838267445 0.836927434 0.573409021 1.175087415

YGR212W YGR212W::YGR212W::molecular\_function unknown 1 1.058427135  
1.283121383 1 1.242667367 1.353722639 1.164117294  
1.221313733 1 1.08704829 1.233333006 1.137601349 1.259668984 1  
1.126792302 1.185874724 1.007891514 1 0.769690389 0.956372479  
0.698133247 1 1.202109495 0.93541227 1.150480503 1.080472829 1  
0.843470808 0.866667968 1.018907898 1.178304198 0.848089524 1  
1.131270139 1.166506289 1.081749364 0.919609397 1.445204032 3.064684  
YCRX20C YCRX20C 1 1.084836394 0.82976925 0.580963741 1  
1.202529597 1.230998025 0.85616735 0.648578417 1 1.278378033  
1.207732261 0.488460165 1.144118315 1.255582362  
0.610632764 1 0.319903248 0.701163709 1 1.027627062  
1.021000184 1.067240476 1.444693985 1.013643973 1 0.696178863  
0.480195788 0.608031115 0.763049453 0.455326241 1 0.610048598  
0.85736589 0.463404654 0.897597973 0.732021686  
YDL001W YDL001W::RMD1::Required for Meiotic Division 1 1.147804541  
1.158389456 1.162192248 1 1.102915434 1.031047032  
1.013520759 1 1.191130187 1.262701481 1.092439567 1.492420547 1  
0.46351975 0.576518375 0.633313349 1  
1.243994801 1.50488016 1.523540692 1.377772065 1.394942504 1  
0.94992143 1.210309812 1.020165612 1.214050313 1.016161256 1  
1.089379478 1.095002726 1.198997666 0.943042283 1.206176798 0.916778372  
YDL015c YDL015c::TSC13::ER protein involved in very long chain fatty acid  
synthesis 1 1.473704134 0.821006215 1.019647833 0.918181708 1  
1.050807453 0.901682002 0.712768398 0.789181173 1 1.212745335  
0.913776712 0.807398859 0.85946696 1 0.847186811 0.828065252  
0.76276975 1 0.843103482 0.324542149 0.636372755 1.060053154 1  
1.359795849 1.180177778 1.531773999 1.797119672 1.02319434 1  
0.813404337 1.120877602 0.784739839 0.526767962 0.595206021 1  
0.990334271 0.857213139 0.765847011 0.964770781 0.900586632 1.032360714  
YDL017W "YDL017W::CDC7::Required for mitotic DNA synthesis but dispensable  
for premeiotic DNA synthesis and spindle pole body duplication; required for  
synaptonemal complexes, meiotic recombination, spindle pole body separation and  
spindles" 1 1.410922878 1.205432273 1.20735406 1 1.333616782  
1.251341181 1 1.398383646 1.227193622 1.506167571  
0.92513172 0.710097988 0.755039185 0.675404245  
0.640905699 1 0.869242828 1.04798605 1.147035459 1.029145641  
0.929197104 0.891173532 0.927373842 1.004790824 0.866439064  
0.770706381 1 1.241984321 1.336304567 1.221200128 1.063707262  
1.030600843 1.082271213  
YKL052C YKL052C::ASK1::<b>A</b>ssociated with <b>S</b>pindles and  
<b>K</b>inetochores 1 0.827052086 1.092079367 0.823492456 0.729336142 1  
0.961855531 1.062665599 1.174600017 0.96321362 1 1.061603744  
1.140531703 1.384571534 0.853691197 1 0.97601677 0.875684536  
0.846489293 1.076232734 1 1.286151569 1.460005215 0.881746142  
0.833928452 1 0.944859599 1.206587422 1.068091728 0.872048627  
0.957205487 1 0.939432564 1.116899414 0.993288237 1.27286731  
1.23667902 1 1.034507304 0.962466948 1.168065558 1.219470064  
0.929538685 0.815205939  
YDL019c YDL019c::OSH2::Oxysterol Binding Protein 1 1.162891287  
1.146444836 1.350493473 0.902323955 1 1.259415995 1.312159995  
0.895818798 1 1.510999436 1.42184444 0.888238919 1.23632623  
1.379321106 1.975797494 1.495509325 0.565247907 0.922530662  
0.538131335 1 1.015752028 1.21740878 1.385054645 1.207188923  
0.969768184 1 1.146662261 0.720092938 0.955603246 0.832214139  
0.43396016 1 0.927611873 0.864592267 0.954106508 0.7575062  
0.805602869 0.743404756

YKL054C YKL054C::DEF1::RNA polymerase II DEgradation Factor 1 1  
 1.459633336 1.343307481 1.615310885 1.510841161 1 1.503013056  
 1.492944602 1.217011959 1 1.342224454 1.577856597 1.125432828  
 1.422930062  
 0.930127712 0.916229468 0.913812744 1 0.859864786  
 0.913046171 0.559205853 1 0.796497164 0.971547679 0.695101079  
 1.079309913 0.686576566 1.604143183  
 YDL021W YDL021W::GPM2::Similar to GPM1 (phosphoglycerate mutase); converts  
 3-phosphoglycerate to 2-phosphoglycerate in glycolysis 1 0.726890818  
 1.782683916 1.545906892 2.250217032 1 1.049074153 1.577149815  
 2.445013624 1.894716086 1 1.281141735 2.53193728 4.942537667  
 3.046337671 1 3.185719857 4.289208714 5.440997894 5.394235874 1  
 4.481619968 7.783388027 10.41187924 4.671364229 1 1.01615264  
 2.252941459 1.825062201 0.984712569 1.550886834 1 3.630281383  
 8.644392382 9.523027128 8.853367882 1 1.407657877 2.654449777  
 1.614651978 1.657991659 6.504639871 1.578750049  
 YKL056C YKL056C::YKL056C::molecular\_function unknown 1 2.03834976  
 1.579049665 0.955135262 1.485038865 1 1.529132967 1.260450643  
 1.529537068 1 1.575090664 1.038540623 0.902986443 0.906729798 1  
 0.673934784 0.385616368 0.283133287 0.621259168 1 1.210720163  
 0.735313976 0.547307995 0.783180751 1 1.247933486 1.017283623  
 1.141585508 1.482170871 1.201204751 1 1.199968689 1.058036906  
 0.748354378 0.450805325 0.760721705 1 1.30378988 0.926448027  
 0.816809015 1.076879139 0.812054396 1.385237183  
 YDL023c YDL023c::YDL023C::molecular\_function unknown 1 1.273957653  
 1.326750542 1.093286281 0.657859906 1 1.720470424 1.871947755  
 0.843266894 0.657869707 1 2.186188627 2.089712499 1.459739321  
 1.037281827 6.145517901 7.179797318 9.930611887 6.139335046 1  
 4.100671066 1.751265244 2.55683557 1 1.190866218 1.352389683  
 1.548382438 0.952421818 0.977640768 1 1.355253756 1.047299394  
 1.690307718 1.013330998 0.473587422 1 1.619973942 0.715396009  
 1.07531643 0.523324855 1.416701508 1.027106933  
 YGR226C YGR226C::YGR226C::molecular\_function unknown 1 1.253088044  
 1.470798643 1.517873213 1.877957629 1 1.385936077 1.510972614  
 1.473012306 1.626786761 1 1.103684377 1.598093194 2.3264711  
 1.693910461 0.427198636 0.657378568 0.534991309  
 0.373697618 0.43130896 1 0.949819484  
 1.068956777 1 0.963970898 0.881556629 0.849456381 0.96124304  
 1.024853177 1 0.864970753 1.064558463 1.203650958 1.082723565  
 1.293225538 0.968440097  
 YKL058W "YKL058W::TOA2::Transcription factor IIA, small chain" 1  
 1.643269347 1.446564442 0.924692637 1.467019425 1 1.093884097  
 1.237335393 1.448966962 1 1.052677699 1.027569617 1.465903362  
 0.929686115 1 1.010536468 0.638354892 0.707720464 1.272702493 1  
 1.940437326 1.845871774 1.65361541 1.509060952 1 1.283985966  
 1.120460332 1.071397815 1.061970268 1.227664914 1 0.9723082  
 1.320984728 1.259979252 0.829663871 0.831676539 1 1.270725524  
 1.253451909 0.92720986 1.287327499 1.216701664 1.195226768  
 YDL025c YDL025c::YDL025C::not yet annotated 1 0.703683218 0.760125403  
 0.940116425 0.633800216 1 0.898299933 0.981709563 0.798980975  
 0.582102268 1 9.687743995 6.391812275 2.549166284 3.152238845 1  
 5.389452249 6.087715039 4.443892055 1.878589373 1 1.890553036  
 1.173039036 1.189494315 1.203894168 1 1.325262099 1.726054082  
 1.207261148 1.369644128 1.448456513 1 1.264105767 0.885660962  
 1.435312536 1.01615239 0.68869736 1 0.961662768 0.713404294  
 0.937667654 0.489713428 1.220085823 1.824800513

YGR228W YGR228W::YGR228W::molecular\_function unknown 1 0.844265481  
1.189039175 0.973103044 1.601862681 1 0.959338213 0.766302238  
1.219815749 1.195638782 1 0.734179379 0.802595823 1.186479797  
1.164161323 1 0.606500084 0.520976994 0.477729998 0.93296533 1  
0.821357549 1.363802856 1.401388576 0.732078119 1 0.582368138  
0.542456291 0.379848492 0.470407261 0.662447473 1 0.8974672  
0.722065107 0.560623393 1.042198232 1.403532539 1 0.925683372  
0.708630543 1.359108725 1.355213912 1.492167131 1.592760061  
YKL072W YKL072W::STB6::binds Sin3p in two-hybrid assay 1 1.091213707  
1.155619147 1.269143808 1.039710707 1 1.4302432 1.149593889  
1.275139725 1 1.204825889 0.977625294 1.052447896 1.033692804 1  
1.121970532 1.329275892 1.333832614 0.734781188 1 0.620658636  
1.011324764 1 1.15237635 1.02642985 1.032412984 1.18114405  
1.333877768 1 1.148612563 0.839858348 0.787232888 0.73611567  
0.762346569 1 1.143342853 0.948626807 0.856469993 1.189309685  
0.779960579 0.851982143  
YDL039c YDL039c::PRM7::pheromone-regulated membrane protein 1  
1.268348156 1.085551412 1.423993591 0.999655556 1 1.135483405  
1.11314829 1.285074622 1.266795253 1 1.357771766 1.000112741  
1.09294736 1.34460814 1 0.650009505 1.767539033 1.519488968  
0.586793181 1 0.734814319 0.636051723 0.140605678 0.356061617 1  
1.364648928 1.170937631 1.201325044 1.725562763 1.311540295 1  
0.853826224 0.466722005 0.584560553 0.27829256 1 0.63465485  
0.414584274 0.68499956 0.326442758 0.71224279 0.415921395  
YGR230W YGR230W::BNS1::bypasses need for SPO12 1 1.462987624  
1.978990146 1.531950547 2.407839146 1 1.340156776 1.319951497  
1.98711949 1.870199677 1 1.336849045 1.727527196 2.614111202  
1.400023207 0.455120117 0.465038269 0.485233611 0.534991309 1  
1.501583684 2.737768829 2.015584036 0.959223607 1 0.904385959  
0.905935883 0.623207072 0.845108675 1 1.0282721 0.926604428  
0.8089499 0.718296192 1.232396548 1 1.229497415 1.065863777  
1.344102956 1.864203451  
YKL074C YKL074C::MUD2::Involved in early pre-mRNA splicing 1  
0.674620647 0.745356332 0.963206392 0.868637377 1 0.902506317  
0.812155589 0.848818853 1 0.746560534 0.798397061 0.562399326  
1.025964613 1 0.536689756 0.723313523 0.753767632 1  
0.598651388 0.729004689 0.775508008 0.801132734 1 0.962058046  
0.905337678 0.805280037 0.857205271 1.101437492 1 1.189714503  
1.044992763 1.666692299 1.794780694 0.969504171 1 0.822097106  
0.964108815 1.161633619 1.032543933 0.900252531 0.841474686  
YDL041w YDL041w::KRE26::Killer toxin REsistant 1 0.944399295  
0.854348204 1.137233263 0.822121424 1 1.057418632 1.071011682  
1.085496375 0.817380688 1 0.961845725 0.758962554 0.626968339  
1.199408312 1 0.272434063 0.615942544 1 0.807499037  
1.025791113 0.888595079 1 0.796050761 0.622903643 1.166221048  
1 0.76829168 0.534252533 1.137952554 1 0.803513875  
0.480335757 1.105076976 0.235540531 1.034111939  
YGR232W YGR232W::NAS6::Interaction with the 19S regulatory particle of the  
26S proteasome detected by coimmunoprecipitation. 1 1.231621489  
1.353791025 1.083065508 1.588057802 1 1.144423751 1.171220459  
1.318047822 1.476324625 1 1.187712576 1.433472201 1.9277734  
1.140892638 1 1.517143188 1.579657351 1.536161764 2.025712426 1  
1.491785299 1.927203982 1.829293524 1.517262536 1 1.201455726  
1.415791051 1.282533453 0.98799144 1.027879358 1 1.1974171  
1.713506021 1.45192558 1.037543273 1.188157416 1 1.259935078  
1.712765249 1.049189242 1.379259683 1.011999357 2.30026433



YKL076C YKL076C::PSY1::Platinum Sensitivity 1 1.463785025 1.619024411  
 1.525463548 2.239355924 1 1.300372726 1.136482464 1.86916758 1  
 1.162444098 1.286925378 2.094370029 1.504171573 1 0.788056247  
 0.685496753 0.787566933 1.219588044 1 1.130574512 2.392867777  
 1.754655318 1.045285257 1 1.139202981 0.888734301 0.822497546  
 0.885064276 1.179940811 1 1.130599189 1.015730064 1.196248855  
 0.856036512 1.099130089 1 1.230432615 1.077723635 1.042067884  
 1.261814872 1.122856064 1.75299933  
 YKL078W YKL078W::DHR2::DEAH-box protein involved in ribosome synthesis  
 1.14632819 1.369728877 1.123856414 1.007325717 1.011609826  
 1.128882957 1.697465626 0.483458424 0.28769904 0.259421655  
 1.334362042 1 0.203531982 0.400737679 1 0.243195019  
 0.369998911 1 0.400131761 0.301602106 0.434332805 0.784363281  
 0.774102822 1 0.532763303 0.317268866 0.389353076 0.959549507  
 0.329028263 1 0.329079023 0.337896934 0.797392681 0.226688759  
 0.646210491  
 YGR234W YGR234W::YHB1::may play a role in the oxidative stress response 1  
 1.106297926 0.712801812 0.651888477 0.674519312 1 0.996155166  
 0.767884658 0.55511146 0.440922579 1 4.75898479 10.38441166  
 6.211184081 7.054183068 1 4.054868864 6.841368027 6.081378582  
 4.691227254 1 1.660179453 0.56477351 0.52355737 1.281661 1  
 2.505236693 4.737528007 8.18747143 10.41709582 7.055552882 1  
 0.905932093 0.768587832 1.085579717 0.876376652 0.779678785 1  
 1.327644947 1.141155799 1.969846533 1.238050302 0.733183918 13.58092844  
 YKL080W YKL080W::VMA5::42 kDa subunit of V1 sector 1 1.017037102  
 0.862108324 0.961669051 1.103729577 1 1.049542725 0.959636003  
 0.754816205 0.989666852 1 0.934247462 0.931313279 0.816962549  
 0.817810303 1 1.509924541 1.003024172 1.034242919 1.044249251 1  
 0.962330892 0.56472601 0.611856246 0.858234245 1 0.943936854  
 0.97980115 0.889655282 1.105306374 0.820016451 1 0.98744715  
 1.061845944 1.055751197 0.721857351 0.633742204 1 1.06793979  
 1.041345227 1.049999177 0.971439048 0.917653933  
 YGR236C YGR236C::SPG1::Hypothetical ORF 1 1.485756351 2.11351155  
 1.740258275 2.071074174 1 1.73343521 1.713301187 1  
 1.392182288 2.801938012 1.633843093 0.416960781  
 0.464791404 0.270086736 0.82412739 1  
 0.801346326 1.216624323 1.038461923 0.891568805 1 0.887648365  
 1.040936101 0.969436671 0.937199002 1.641602232 1 0.820696116  
 1.108947171 1.277950944 1.28916452 1.511258485 0.917653933  
 YKL082C YKL082C::YKL082C::molecular\_function unknown 1 1.981880704  
 1.908469327 1.531095279 1.915025656 1 1.192736354 1.810234748  
 1.629822162 1 1.119783362 1.181161949 1.697332355 1.452131818 1  
 0.874333101 0.603630036 0.880362897 0.962815465 1 1.026756468  
 1.117288148 0.730049229 0.536679512 1 0.675712305 0.733273719  
 0.529573144 0.497228106 0.978948013 1 0.826660244 0.975221069  
 0.995026843 1.408036142 1.359847845 1 0.870734879 0.933529643  
 0.851212686 1.491296414 0.74518647 1.119047469  
 YGR250C YGR250C::YGR250C::molecular\_function unknown 1 1.165885251  
 1.362173464 1.181995112 1.432143397 1 1.194943925 1.251899716  
 1.276175456 1.196491292 1 1.103841902 1.270465326 1.607053499  
 0.94783346 1 1.300861627 1.146356113 1.245389814 2.066300264 1  
 1.223210598 1.628761075 1.653913186 1.428274403 1 1.419229042  
 1.886030745 2.159196291 2.348843906 1.938313498 1 1.045956542  
 0.968989382 1.16825358 0.957456807 0.698463847 1 1.71251425  
 1.411862802 1.345338213 1.174307139 1.212700766 1.67156625  
 YGR252W YGR252W::GCN5::functions in the Ada and SAGA (Spt/Ada) complexes to  
 acetylate nucleosomal histones 1 0.936610316 1.102324776 1.134791071

|             |                                                                                                                                              |             |             |             |             |             |
|-------------|----------------------------------------------------------------------------------------------------------------------------------------------|-------------|-------------|-------------|-------------|-------------|
| 1.214648525 | 1                                                                                                                                            | 1.083147839 | 1.04814961  | 1.097268172 | 1.028509117 | 1           |
| 0.886446724 | 0.977285234                                                                                                                                  | 0.997441767 | 1.009834717 | 1           | 1.330422682 |             |
| 0.936567636 | 1.099501156                                                                                                                                  | 0.876278718 | 1           | 1.144297838 | 0.877666742 |             |
| 0.810202403 | 0.652577808                                                                                                                                  | 1           | 0.944877594 | 1.144575981 | 1.036278697 |             |
| 0.966294889 | 1.157856262                                                                                                                                  | 1           | 1.176047912 | 0.980800475 | 1.003470168 |             |
| 0.960242348 | 1.075073117                                                                                                                                  | 1           | 1.163263791 | 1.031492634 | 1.091227564 |             |
| 1.186505119 | 1.066436156                                                                                                                                  | 0.951803299 |             |             |             |             |
| YGR254W     | YGR254W::ENO1::enolase I                                                                                                                     | 1           | 1.349375976 | 0.874715083 |             |             |
| 0.706794226 | 0.379925881                                                                                                                                  | 1           | 1.474569003 | 1.189192574 | 0.464540647 |             |
| 0.519100312 | 1                                                                                                                                            | 1.195426087 | 1.15760446  | 0.981737768 | 0.445414646 | 1           |
| 1.811614451 | 1.842595135                                                                                                                                  | 2.32227275  | 1.161660334 | 1           | 1.446042466 |             |
| 0.595621259 | 0.723351339                                                                                                                                  | 1.004462035 | 1           | 1.131026815 | 0.990836073 |             |
| 1.878255058 | 1.44890332                                                                                                                                   | 1.326439112 | 1           | 1.049846971 | 0.870077912 |             |
| 0.915952417 | 0.732098953                                                                                                                                  | 0.361551689 | 1           | 1.335196273 | 0.800597586 |             |
| 1.305663622 | 0.612157013                                                                                                                                  | 0.891547856 | 1.302928543 |             |             |             |
| YGR256W     | "YGR256W::GND2::6-phosphogluconate dehydrogenase, decarboxylating; converts 6-phosphogluconate + NADP to ribulose-5-phosphate + NADPH + CO2" | 1           |             |             |             | 1           |
| 1.268924936 | 1.009744153                                                                                                                                  | 1.314533418 | 0.829383665 | 1           | 1.124087831 |             |
| 1.279825515 | 1.091770424                                                                                                                                  | 1.383308877 | 1           | 1.038203118 | 1.049540678 |             |
| 1.537906547 | 1.563363352                                                                                                                                  | 1           | 1.836506806 | 3.144923016 | 7.832084729 |             |
| 6.03521704  | 1                                                                                                                                            | 0.84369424  | 0.68928417  | 3.005058349 | 1           |             |
| 1.067740036 | 0.939390548                                                                                                                                  |             | 1.727604575 | 1.823012919 | 1           | 0.886530216 |
| 0.777920693 | 0.817967983                                                                                                                                  | 0.689549032 | 0.522644113 | 1           | 1.516210119 |             |
| 1.021157788 | 1.571930197                                                                                                                                  | 1.078858539 | 1.083258427 | 1.682949372 |             |             |
| YDL043C     | YDL043C::PRP11::snRNA-associated protein                                                                                                     | 1           | 0.896746456 |             |             |             |
| 0.852675305 | 1.11141598                                                                                                                                   | 1.262271372 | 1           | 0.908766451 | 0.976471734 |             |
| 1.022832819 | 1.049710598                                                                                                                                  | 1           | 0.823183084 | 0.873505348 | 0.731656916 |             |
| 1.034938164 | 1                                                                                                                                            | 0.719737492 | 0.731830498 | 1.005437742 | 0.891122124 | 1           |
| 1.17511322  | 0.649982567                                                                                                                                  | 1.177499511 | 1.370845448 | 1           | 0.908622663 |             |
| 0.885734739 | 1.05100322                                                                                                                                   | 1.000398139 | 0.962157236 | 1           | 0.884759288 |             |
| 0.727690342 | 0.484656816                                                                                                                                  | 0.606831563 | 0.502767645 | 1           | 0.889216999 |             |
| 0.693809328 | 0.737041971                                                                                                                                  | 0.547984011 | 0.88191661  | 0.61556368  |             |             |
| YDL045C     | "YDL045C::FAD1::Flavin adenine dinucleotide (FAD) synthetase, which performs second step in synthesis of FAD from riboflavin"                | 1           | 0.864786663 |             |             |             |
| 0.944585096 | 0.88427766                                                                                                                                   | 0.973293273 | 1           | 0.781954641 | 0.881056718 |             |
| 1.145151278 | 1.089527432                                                                                                                                  | 1           | 0.902386876 | 0.974906644 | 1.119984193 |             |
| 1.084838671 | 1                                                                                                                                            | 0.871093357 | 0.714868091 | 0.779239107 | 0.896185194 | 1           |
| 1.363336439 | 1.455947079                                                                                                                                  | 1.208787014 | 0.749840226 | 1           | 1.079032853 |             |
| 1.176712564 | 1.131572007                                                                                                                                  | 0.902155114 | 1.001007633 | 1           | 1.246433473 |             |
|             | 1.216063997                                                                                                                                  | 1           | 1.187722392 | 1.149443018 | 1.199263059 | 0.973751384 |
| 1.113314256 | 0.950052073                                                                                                                                  |             |             |             |             |             |
| YDL047W     | YDL047W::SIT4::SIT4 suppress mutations in DBF2                                                                                               | 1           | 0.804449858 |             |             |             |
| 0.823277586 | 0.712512669                                                                                                                                  | 0.5169863   | 1           | 0.85220643  | 0.802895051 |             |
| 0.750176817 | 0.710586576                                                                                                                                  | 1           | 0.758547472 | 0.807257424 | 0.730091161 |             |
| 0.716338226 | 1                                                                                                                                            | 0.926187217 | 0.917408204 | 0.929866367 | 0.858052375 | 1           |
| 1.111735069 | 0.842590563                                                                                                                                  | 0.761278004 | 0.645828445 | 1           | 1.045174127 |             |
| 0.953789877 | 1.236047417                                                                                                                                  | 1.179363519 | 1.253469546 | 1           | 0.833732866 |             |
| 0.664589362 | 0.559490256                                                                                                                                  | 0.805389046 | 0.563120552 | 1           | 0.718249864 |             |
| 0.606312973 | 0.87986235                                                                                                                                   | 0.771440837 | 0.715552325 | 0.782807851 |             |             |
| YPR143W     | YPR143W::YPR143W::molecular_function unknown                                                                                                 | 1           | 0.454725459 |             |             |             |
| 0.691665232 | 0.64869074                                                                                                                                   | 1.042679544 | 1           | 0.584648826 | 0.561773687 |             |
| 0.866911094 | 0.978369273                                                                                                                                  | 1           | 0.374732288 | 0.438823109 | 0.53408782  |             |
| 0.826969634 | 1                                                                                                                                            | 0.281137379 | 0.238259248 | 0.307926771 | 0.584511861 | 1           |
| 0.650341766 | 0.875407783                                                                                                                                  | 0.861816502 | 0.609409999 | 1           | 0.583688378 |             |
| 0.685806985 | 0.513010684                                                                                                                                  | 0.488746209 | 0.767826913 | 1           | 0.87338427  |             |
| 0.935516898 | 0.892985649                                                                                                                                  | 1.727140782 | 1.614671629 | 1           | 0.617339622 |             |
| 0.841990097 | 1.157900604                                                                                                                                  |             | 0.81507845  | 1.06475875  |             |             |

YDL049C YDL049C::KNH1::46% identical at amino acid level to Kre9p; located extracellularly 1 1.107484608 1.157462155 1.172001629 1.126524426 1 0.966062014 0.951894802 1.373850002 1.307599173 1 0.746845054 0.705117753 1.127772984 1.651667159 1 0.530796797 0.292345739 1.220917559 1 2.210627296 2.303414016 1.80719453 1.786357738 1 1.107807475 1.398291246 1.214342404 1.132083945 1 1.148311759 1.246732013 1.029733823

YPR145W YPR145W::ASN1::Asn1p and Asn2p are isozymes 1 0.664507536 0.617325874 0.699009484 0.441742064 1 0.880623022 0.840921411 0.555903382 0.573157846 1 1.184593817 0.838867332 0.420438622 0.520154596 1 1.138283871 0.781499558 0.61975685 0.442301877 1 0.830794594 0.581108369 0.420083846 0.463253219 1 1.064899697 0.804603409 1.552946632 1.191135021 0.781018422 1 1.031312037 0.544881714 1.075308977 0.999086301 0.560707724 1 1.254663367 0.800334294 1.688820385 0.695480123 1.059220297 0.564777463

YDL063c YDL063c::YDL063C::molecular\_function unknown 1 0.646996527 0.444623142 0.797292283 0.604573109 1 0.578046816 0.529994017 0.745638563 0.853382675 1 0.289509895 0.191837821 0.159782169 0.803716926 1 0.199440062 0.146223014 0.466522039 1 0.409606429 0.371624455 0.645350806 1 0.798253429 0.568515206 0.784305428 1.075494861 1.15569113 1 0.61454403 0.519681125 0.253085736 0.845638481 0.598526234 1 0.661384765 0.523274475 0.988400149 0.915759633 0.461938831 0.616439293

YPR147C YPR147C::YPR147C::molecular\_function unknown 1 0.889031866 0.84256889 0.910001901 0.803714095 1 0.851523404 0.798944426 1.030469377 1 0.937139523 0.870250314 0.817703639 0.845618731 1 0.975923134 0.915795622 0.671817398 1 1.058433122 1.369486082 1 1.278845272 1.470031198 1.394778597 1.35877348 1.20518351 1 1.054906081 1.280485684 1.246099966 0.903690832 1 1.083889511 0.921613388 0.854168571 1.011356321 0.773999374 1.294172311

YDL065c YDL065c::PEX19::40 kDa farnesylated protein associated with peroxisomes 1 0.787327439 1.171717046 1.08686735 1.161646177 1 0.811851179 0.826078334 1.366100165 1.149863673 1 0.845945386 1.174517906 1.44053268 1.180575937 1 1.102588694 0.675278862 0.87099491 1.251826836 1 1.993928449 1.971894538 1.699347171 1.253813412 1 0.961427443 1.258274787 0.731668397 0.621283465 1.044487051 1.214591979 1.058481964 1.061341686 1 1.523996661 1.725392387 1.421112873 1.441259167 1.464756122 1.136559933

YPR161C YPR161C::SGV1::CDC28/cdc2 related protein kinase 1 0.971026798 1.090072762 1.161772418 0.920659928 1 1.259160097 1.22136211 1.097161408 1.007665269 1 1.108864172 1.136522201 0.892764398 1.209235305 1 0.870625115 0.535248462 0.784629362 0.873813705 1 0.901734329 0.869679407 0.653708945 0.702294889 1 1.101202726 0.9066355 1.194665784 0.974585157 0.937742226 1 0.871960377 1.220141712 1.094942643 0.945185666 1 1.148664709 0.992294566 1.323404187 0.906708102 0.974821164 0.804698482

YDL067C YDL067C::COX9::Plays role in cytochrome c oxidase holoenzyme assembly or stability 1 1.628044409 1.911603062 0.963066758 1.954429002 1 1.157750401 1.264918153 1.781096456 1.897401116 1 1.275629801 1.146777726 1.877931022 1.027746272 1 1.07185762 0.642777734 0.762704831 1.344341997 1 1.931603299 1.600973721 1.907309455 1.302553352 1.176640112 0.512235311 1.268177909 1.240106116 1 0.624524908 0.549497627 0.292678816 0.438000507 1.427418387 1 0.966033622 1.163874189 0.644705416 2.106455771 1.68968241 1.404500872

YPR163C YPR163C::TIF3::Suppressor of translation mutants 1 0.881165189 0.684755561 0.874184332 1.04420329 1 0.904767731 0.652541889 0.822540073 1 0.704118472 0.448845041 0.369811894

|             |                                                                                                                                                                                                         |             |             |             |             |
|-------------|---------------------------------------------------------------------------------------------------------------------------------------------------------------------------------------------------------|-------------|-------------|-------------|-------------|
| 0.77524695  | 1                                                                                                                                                                                                       | 0.706284837 | 0.367390434 | 0.317377712 | 1           |
| 0.732778682 | 0.414822777                                                                                                                                                                                             | 0.331933317 | 0.6614629   | 1           | 0.976238925 |
| 0.672690692 | 1.14892632                                                                                                                                                                                              | 1.272093337 | 1.232582649 | 1           | 1.265120081 |
| 0.641730845 | 0.848246467                                                                                                                                                                                             | 0.754997363 | 0.43752305  | 1           | 0.95347557  |
| 0.42803731  | 0.578888835                                                                                                                                                                                             | 0.622684901 | 0.286393766 | 0.948300744 |             |
| YGR258C     | "YGR258C::RAD2::Incision step of nucleotide excision repair of DNA damaged by UV light; co-purifies with transcription factor, TFIIH mRNA is cell cycle regulated & induced by DNA damage & by meiosis" |             |             |             |             |
|             | 1                                                                                                                                                                                                       | 1.080077662 |             |             |             |
| 1.248366667 | 1.269623921                                                                                                                                                                                             | 1.18033857  | 1           | 1.341604399 | 1.430207104 |
| 1.185919902 | 1.159127427                                                                                                                                                                                             | 1           | 1.390486397 | 1.496854378 | 1.022277501 |
| 1.197840891 | 1                                                                                                                                                                                                       | 1.228624054 |             | 0.878668784 | 0.770782977 |
| 1.139719461 | 0.619493348                                                                                                                                                                                             |             | 1           | 1.008249401 | 1.272223034 |
| 1.12090766  | 0.96611483                                                                                                                                                                                              | 1.107474838 | 1           | 1.240651774 | 1.122244405 |
| 1.171919783 | 1.256157207                                                                                                                                                                                             | 1.086119265 | 1           | 1.093288939 | 1.195323401 |
| 1.23365456  | 1.064478292                                                                                                                                                                                             | 1.034436674 | 0.992082006 |             |             |
| YDL069C     | YDL069C::CBS1::translational activator of cytochrome b                                                                                                                                                  |             |             |             |             |
|             | 1                                                                                                                                                                                                       |             |             |             |             |
| 0.80008072  | 1.23911546                                                                                                                                                                                              | 0.882335803 | 1.61570147  | 1           | 0.815038698 |
| 0.846635112 | 1.403947017                                                                                                                                                                                             | 1.093638484 | 1           | 0.8643259   | 1.049767107 |
| 1.518650203 | 0.907917327                                                                                                                                                                                             | 1           | 0.68833891  | 0.638206641 | 0.96730716  |
| 1.243711083 | 1                                                                                                                                                                                                       | 2.088403361 | 3.371844788 | 3.326018631 | 1.814356059 |
| 0.812417584 | 1.136908729                                                                                                                                                                                             | 0.643406582 | 0.551794749 | 1.104037154 | 1           |
| 1.553712505 |                                                                                                                                                                                                         | 1.317166902 | 2.230270906 | 1           | 0.977274795 |
| 0.994565635 | 1.53849047                                                                                                                                                                                              | 1.888079802 | 1.433396457 |             |             |
| YPR165W     | YPR165W::RHO1::Gtp-binding protein of the rho subfamily of ras-like proteins                                                                                                                            |             |             |             |             |
|             | 1                                                                                                                                                                                                       | 1.131158547 | 1.318683299 | 1.063340086 | 1.487401518 |
| 1.070713968 | 1.006843647                                                                                                                                                                                             |             | 1.284616881 | 1           | 0.782615646 |
| 1.252854277 | 0.925073922                                                                                                                                                                                             | 1           | 1.128490699 | 0.885962862 | 0.948403294 |
| 1.475101291 | 1.266531588                                                                                                                                                                                             | 1.952996539 | 1.402914679 | 1           | 1.327469454 |
| 1.109520287 | 1.057852776                                                                                                                                                                                             | 1.090537871 | 1.159134812 | 1           | 1.414005741 |
| 1.290537862 | 1.088668566                                                                                                                                                                                             | 0.696388129 | 1.055164853 | 1           | 1.283693998 |
| 1.168644134 | 0.951174859                                                                                                                                                                                             | 1.442892546 | 1.255219864 | 0.985952665 |             |
| YGR260W     | YGR260W::TNA1::Transporter of Nicotinic Acid                                                                                                                                                            |             |             |             |             |
|             | 1                                                                                                                                                                                                       | 1.344747951 |             |             |             |
| 0.885920111 | 1.033798618                                                                                                                                                                                             | 0.864105687 | 1           | 1.224304128 | 1.058405531 |
| 0.701459023 | 0.845897568                                                                                                                                                                                             | 1           | 1.15142036  | 0.85707188  | 0.580820528 |
| 0.890224151 | 1                                                                                                                                                                                                       | 1.700773126 | 1.230694001 | 1.34701351  | 1.160401975 |
| 0.912398798 | 0.588773215                                                                                                                                                                                             | 0.624962202 | 0.823366236 | 1           | 1.222904541 |
| 0.863642209 | 1.094512592                                                                                                                                                                                             | 1.453795279 | 1.034348497 | 1           | 0.923894365 |
| 0.683852734 | 0.980154443                                                                                                                                                                                             | 0.914173978 | 0.589784347 | 1           | 1.170531131 |
| 0.717726789 | 0.920250174                                                                                                                                                                                             | 1.022203679 | 0.791395358 | 1.622531311 |             |
| YDL071c     | YDL071c::YDL071C::molecular_function unknown                                                                                                                                                            |             |             |             |             |
|             | 1                                                                                                                                                                                                       | 1.224802497 |             |             |             |
| 0.96756195  | 1.305920977                                                                                                                                                                                             | 0.956628323 | 1           | 1.140591949 | 1.093882826 |
| 1.300945514 | 1.051250636                                                                                                                                                                                             | 1           | 1.35871661  | 1.106610614 | 1.163779339 |
| 1.137666262 |                                                                                                                                                                                                         | 0.604034674 |             | 1           | 1.001310493 |
|             |                                                                                                                                                                                                         | 0.959800524 | 0.796146874 | 1.074266979 | 1           |
| 0.555527496 |                                                                                                                                                                                                         |             |             | 0.827208911 | 0.740417328 |
| 0.618137479 |                                                                                                                                                                                                         |             |             |             |             |
| YGR274C     | YGR274C::TAF1::TAFII complex component required for activated transcription                                                                                                                             |             |             |             |             |
|             | 1                                                                                                                                                                                                       | 1.101426551 | 1.183480178 | 1.419437542 | 1.250148508 |
| 1.42576865  | 1.457915913                                                                                                                                                                                             | 1.326933088 | 1.16446822  | 1           | 1.12398264  |
| 0.82331856  | 1.377039058                                                                                                                                                                                             | 1           | 1.151305244 |             |             |
|             | 1                                                                                                                                                                                                       | 1.023982875 | 1.137772392 | 1.088246848 | 1.308072972 |
| 1.301457344 | 1                                                                                                                                                                                                       | 0.947972897 | 0.79933455  | 0.847677769 | 0.918421777 |
| 0.732069826 | 1                                                                                                                                                                                                       | 0.901323277 | 0.771187591 | 0.939993509 | 0.800933246 |
| 0.86898712  | 0.689991701                                                                                                                                                                                             |             |             |             |             |
| YDL073w     | YDL073w::YDL073W::molecular_function unknown                                                                                                                                                            |             |             |             |             |
|             | 1                                                                                                                                                                                                       | 0.967297678 |             |             |             |
| 0.826562096 | 1.000983638                                                                                                                                                                                             | 0.888584732 | 1           | 0.969244484 | 1.00518205  |
| 0.896760879 | 0.726431765                                                                                                                                                                                             | 1           | 0.923114148 | 0.783509149 | 0.576433751 |

|             |                                                        |             |             |             |             |   |             |             |  |  |
|-------------|--------------------------------------------------------|-------------|-------------|-------------|-------------|---|-------------|-------------|--|--|
| 0.963398277 | 1.370944714                                            | 0.979212905 |             |             |             |   |             |             |  |  |
| 1           | 0.838754715                                            | 0.679092755 | 0.492749456 | 0.967181147 | 1.131259814 | 1 |             |             |  |  |
| 0.822751822 | 0.488874704                                            | 0.604152797 | 0.609200522 | 0.521190849 | 1           |   |             |             |  |  |
| 0.639122735 | 0.51507626                                             | 0.863874829 | 0.446703425 | 0.635999411 | 1.294172311 |   |             |             |  |  |
| YPR167C     | YPR167C::MET16::3'phosphoadenylylsulfate reductase     |             |             |             |             | 1 |             |             |  |  |
| 1.255593676 | 2.377622653                                            | 1.195666291 | 1.387903514 | 1           | 0.845151205 |   |             |             |  |  |
| 1.145203642 | 1.578569091                                            | 1           | 1.923862172 | 3.145684545 | 1.967237055 |   |             |             |  |  |
| 0.893753422 | 1                                                      | 1.067235022 | 0.591733666 | 0.705905651 | 0.790164752 | 1 |             |             |  |  |
| 3.226596918 | 2.726660567                                            | 2.840453963 | 1.923110527 | 1           | 0.743317768 |   |             |             |  |  |
| 0.847698279 | 0.918737268                                            | 0.613070157 | 1           | 0.706071433 | 0.848049904 |   |             |             |  |  |
| 0.978599667 | 1.443287425                                            | 1.005075198 | 1           | 0.851052505 | 0.958738569 |   |             |             |  |  |
| 0.641883986 | 1.040451852                                            | 0.664724612 |             |             |             |   |             |             |  |  |
| YPR167C     | YPR167C::MET16::3'phosphoadenylylsulfate reductase     |             |             |             |             | 1 |             |             |  |  |
| 1.933147023 | 1.647927311                                            | 1.283858842 | 1.279435375 | 1           | 1.461141428 |   |             |             |  |  |
| 1.397805155 | 1.330526658                                            | 1           | 1.665310166 | 1.285557935 | 1.411930113 |   |             |             |  |  |
| 1.167473655 | 1                                                      | 0.696295251 | 0.64638887  |             | 0.587904329 |   |             |             |  |  |
| 0.808472326 | 0.492471712                                            | 1           | 1.081836267 | 1.14334972  | 0.771743317 |   |             |             |  |  |
| 0.931895096 | 1.038886696                                            | 1           | 1.47950386  | 1.724252439 | 1.157610724 |   |             |             |  |  |
| 1.706264278 | 1                                                      | 1.236100507 | 1.482500425 | 1.543900003 | 1.739021385 |   |             |             |  |  |
| 1.741924249 |                                                        |             |             |             |             |   |             |             |  |  |
| YPR169W     | YPR169W::JIP5::Jumonji Interacting Protein             |             |             |             |             | 1 | 0.71348892  |             |  |  |
| 0.709102403 | 0.787839924                                            | 1.123621199 | 1           | 0.772815365 | 0.583299065 |   |             |             |  |  |
| 0.939456215 | 1                                                      | 0.651928155 | 0.518374604 | 0.506552644 | 0.808644597 | 1 |             |             |  |  |
| 0.978861862 | 0.509752475                                            | 0.579438052 | 1           | 0.91303167  | 0.789986655 |   |             |             |  |  |
| 0.671864439 | 1.028510362                                            | 1           | 0.793512559 | 0.757909598 | 0.621836932 |   |             |             |  |  |
| 0.782760372 | 0.851094764                                            | 1           | 0.929980452 | 0.836182805 | 0.725405825 |   |             |             |  |  |
| 0.829753265 | 1.098277894                                            | 1           | 0.916754854 | 0.745067003 | 0.844014126 |   |             |             |  |  |
| 1.024370705 | 0.844151411                                            | 1.077893097 |             |             |             |   |             |             |  |  |
| YGR276C     | "YGR276C::RNH70::RNase H(70), a 70 kDa ribonuclease H" |             |             |             |             | 1 |             |             |  |  |
| 1.063653363 | 1.118625056                                            | 1.071838917 | 1.261906687 | 1           | 1.010393121 |   |             |             |  |  |
| 0.981048901 | 1.131142416                                            | 1.168150447 | 1           | 1.132587696 | 1.052083363 |   |             |             |  |  |
| 1.072728269 | 1                                                      | 0.925689521 | 0.880479199 | 0.783555747 | 1.034894066 | 1 |             |             |  |  |
| 1.196725518 | 1.386903992                                            | 1.177049171 | 1.251934874 | 1           | 1.029765936 |   |             |             |  |  |
| 1.159325821 | 0.955171448                                            | 0.86926251  | 1.008205811 | 1           | 0.999221298 |   |             |             |  |  |
| 1.450602128 | 1.185593618                                            | 1.084068565 | 1.314898574 | 1           | 1.239377964 |   |             |             |  |  |
| 1.454848315 | 1.08714472                                             | 1.325437899 | 1.120478552 | 0.924658939 |             |   |             |             |  |  |
| YPR171W     | YPR171W::YPR171W::molecular_function unknown           |             |             |             |             | 1 | 0.734958947 |             |  |  |
| 0.767833949 | 0.820218814                                            | 0.859251128 | 1           | 0.878133148 | 0.914579768 |   |             |             |  |  |
| 0.663547173 | 0.734926948                                            | 1           | 0.840038865 | 0.79812735  | 0.715945636 |   |             |             |  |  |
| 0.766652864 | 1                                                      | 0.747911399 | 0.767569863 | 0.978243025 | 0.741334878 | 1 |             |             |  |  |
| 0.594937376 | 0.802593724                                            | 0.684586376 | 0.640260884 |             | 0.773774928 |   |             |             |  |  |
| 0.809952876 | 0.931520563                                            | 0.882295075 | 0.812384306 | 1           | 1.053603744 |   |             |             |  |  |
| 1.203189805 | 1.395789481                                            | 1.370364744 | 0.882283607 | 1           | 0.641223548 |   |             |             |  |  |
| 0.611105957 | 0.524370536                                            | 0.716954455 | 0.330397437 | 0.950052073 |             |   |             |             |  |  |
| YGR278W     | YGR278W::CWC22::Complexed with Cef1p                   |             |             |             |             | 1 | 1.202511542 |             |  |  |
| 1.059547264 | 1.432481194                                            | 1.17137618  | 1           | 1.185163768 | 1.296916988 |   |             |             |  |  |
| 1.246199114 | 1.15557466                                             | 1           | 1.135306959 | 1.022262364 | 1.108310178 |   |             |             |  |  |
| 1.172504215 | 1                                                      | 0.608413309 | 0.778108556 | 1.007151527 | 1           |   |             |             |  |  |
| 1.150966034 | 1.431382188                                            | 1.011198596 | 0.907362993 | 1           | 0.924147959 |   |             |             |  |  |
| 0.931213504 | 0.956305863                                            | 0.848337378 | 0.85197406  | 1           | 0.913229041 |   |             |             |  |  |
| 0.974664863 | 0.969492948                                            | 0.798604171 | 1.437366394 | 1           | 1.068080414 |   |             |             |  |  |
| 1.078803588 | 0.943170276                                            | 0.94379628  | 1.253006253 | 0.766171    |             |   |             |             |  |  |
| YPR185W     | YPR185W::APG13::autophagy                              |             |             |             |             | 1 | 0.638374281 | 0.737827868 |  |  |
| 0.870827407 | 0.81297046                                             | 1           | 0.759055351 | 0.913778702 | 0.58120693  | 1 |             |             |  |  |
| 0.943472604 | 0.879156845                                            | 0.588370836 | 0.843016327 | 1           | 0.988671656 |   |             |             |  |  |
| 0.833439985 | 0.656736948                                            | 1           | 1.521788228 | 1.290640577 | 1.276403936 |   |             |             |  |  |
| 1.483829508 | 1                                                      | 0.942566323 | 1.064716757 | 0.889693309 | 0.811187813 |   |             |             |  |  |

1.022815789 1 1.113057699 0.977082939 1.312754949 1.09518229  
0.930778901 1 1.233869692 1.089629893 1.256921116 1.098370894  
1.347804128 0.894012128  
YGR280C YGR280C::PXR1::PinX1-Related gene<br> G-patch Nucleolar protein 1  
0.856054946 0.931489036 1.019863582 1.297015076 1 0.770367033  
0.776188439 0.962781301 1.147795011 1 0.639843781 0.348073157  
0.493470492 1.148063392 1 0.480848898 0.181018898 0.428355788 1  
0.438565414 0.805761175 1 0.636754819 0.405447793  
0.382854933 0.557569542 0.815695867 1 0.9702337 0.731849082  
0.507723966 1.641665946 2.634360905 1 0.684726234 0.524002109  
0.899326042 1.382623112 0.839723408  
YGR282C "YGR282C::BGL2::Cell wall endo-beta-1,3-glucanase" 1  
1.426390452 0.917486251 1.027116694 1.189900914 1 1.151230454  
1.046768235 0.917822295 1.103504677 1 1.071169548 0.878314819  
0.794389987 0.803462799 1 1.395650822 1.080000247 1.193394679  
1.12607705 1 1.272583466 0.474310843 0.467657953 0.708876927 1  
1.339764833 0.928898739 1.922472507 2.111037206 1.047299664 1  
0.90645141 1.026526671 0.912532572 0.704920035 0.538937253 1  
1.053507092 0.742720396 0.715718789 0.728914684 0.948736787 0.836220905  
YGR284C YGR284C::ERV29::ER Vesicle protein of 29 kDa (apparent MW) 1  
1.28157543 0.862460059 0.99228124 0.690073975 1 1.023893579  
0.964077423 0.891523204 0.84090644 1 1.127278271 1.03519009  
1.066525346 0.922969036 1 1.405900651 1.255878738 1.338736751  
1.418905468 1 1.019943204 0.392796146 0.608782764 1.044564554 1  
1.481288827 1.753630375 1.241560793 0.886689631 1 1.061974181  
1.05920134 0.977567648 0.89900937 0.634873458 1 1.406189901  
1.292705145 0.986572761 0.904440574 0.957630501 1.020977592  
YHL002W YHL002W::HSE1::Has Symptoms of class E vps mutant 1  
0.928544436 0.905903328 1.053723234 0.981157489 1 0.907770293  
0.986092148 0.932875666 0.969436686 1 1.00759532 1.056628472  
0.831651041 1.015268398 1 1.440228398 0.841924754 1.191256187  
1.129418112 1 1.373093241 1.300249782 1 0.946956919  
1.102292359 1.015145949 0.819411433 0.870720723 1 1.094050374  
1.016027928 0.928883359 1 1.224579906 0.9669876 0.940400882  
0.857235872  
YHL004W YHL004W::MRP4::Involved in mitochondrial protein synthesis 1  
0.993767806 1.049658143 0.893838165 1 1.105443475 1.221847463  
0.943051446 0.955860568 1 1.024153319 0.975925366 0.922887376  
0.773166933 1 1.255236512 1.080425641 1.05232286 1.022770694 1  
1.074603459 0.612039362 0.707335855 1 1.135697947  
0.96307939 0.994639736 1.001364136 1 1.046758249 0.757858527  
0.581594076 0.674059281 0.590210722 1 0.909841474 0.772170355  
0.772287979 0.681241627 0.974600333 0.835345293  
YDL087c YDL087c::LUC7::Living Under Cap-binding complex expression 1  
0.688134196 0.855489816 0.824095879 0.646666814 1 0.891376306  
0.964508812 1.125889268 0.748129517 1 1.140416904 1.057198057  
0.750720836 0.854265852 1 0.758070989 0.901478763 0.770828453 1  
1.431619499 2.683558664 1.972960002 1.353093779 1.167510005  
1.186122749 1.475662667 1.50420281 1 0.853977641 0.570311027  
0.698532799 0.882564905 0.363220956 1.193089746 0.834574424  
1.36592515 0.812365245 1.392891954 0.841474686  
YDL089w YDL089w::YDL089W::molecular\_function unknown 1 1.116850617  
1.183784896 1.21733211 1.368687208 1 1.127998609 1.204825334  
1.192519218 1.048364869 1 1.376158805 1.193687405 1.365347613  
1.13696293 1 1.659139332 1.058322684 2.157437624 1.456112621 1  
1.287983367 2.616667212 1.861662427 1.38173916 1 1.005651092  
1.144858359 1.051360011 0.959371492 1.03998987 1 1.045812106

1.300728712 1.636406463 0.887674876 1.053892136 1 1.163979897  
0.906596772 0.92612447 1.11563055 1.882591684  
YDL091c YDL091c::YDL091C::molecular\_function unknown 1 0.7930449  
1.139942563 1.134158208 1.270101078 1 0.987171363 1.01835841  
1.263778897 1.082676818 1 1.043604704 1.207378636 1.167322931  
1.270127025 1 1.041481145 0.928671682 1.116884958 1.252046928 1  
1.896633722 1.965449556 3.552246168 1.357682664 1.431223507  
1.035584126 0.871629934 1.130065827 1 0.91341133 1.195315745  
1.290717327 1.06309909 1.752882031 1 1.228097894 1.204972332  
1.115819941 1.086022354 2.026544289 1.47980461  
YPR187W "YPR187W::RPO26::subunit common to RNA polymerases I, II, and III"  
1 0.920663233 1.034858605 0.771001535 1.622550088 1 0.77965373  
0.698786282 1.162907042 1.286936133 1 0.680494902 0.686250594  
0.753636662 0.98076564 1 0.725381001 0.48900811 0.403546933  
0.853484383 1 1.172806558 0.939506766 0.908565504 0.825369566 1  
0.77666068 1.088820922 0.547752649 1.02160556 1.371816476 1  
1.335099524 1.320515138 1.057092646 1.162531616 1.809602416 1  
1.091103515 1.349271965 0.884060421 2.571068624 0.853462929 1.518331988  
YDL093W YDL093W::PMT5::Transfers mannose residues from dolichyl phosphate-D-  
mannose to specific serine/threonine residues of proteins in the secretory  
pathway 1 1.209870142 0.792588326 0.965583815 0.61589322 1  
1.013380473 0.995791391 0.822656931 0.642209315 1 1.017947652  
0.825256284 0.438749728 1.126919362 1 0.869244464  
0.534979596 1 1.722632436 0.717466209 0.642120544 1  
1.145265663 0.890517154 1.168353454 1.446354978 1.401615566 1  
0.670360701 0.54865924 0.847641259 0.429016463 1 0.962589602  
0.751464101 1.155762564 0.700083927 0.788013303 0.695245482  
YPR189W "YPR189W::SKI3::dsRNA virus protection family member, contains 8  
copies of the tetratricopeptide (TPR) domain" 1 0.834552864 0.838452903  
1.056277308 0.727399645 1 1.03500463 0.984563262 0.725181011  
0.665540126 1 1.010219233 0.869252195 0.510866576 0.957997443 1  
1.332460719 0.935842022 1 0.643567739 0.610256348  
0.623229384 0.45815327 1 0.671248068 0.846292966 0.806464365  
0.815578395 1.068035605 1 1.299012552 0.648144859 1.348089691  
1.134593588 0.66550354 1 0.878695685 0.65810326 0.805501685  
0.894952611 0.585434414 1.389615299  
YDL095W YDL095W::PMT1::Transfers mannose residues from dolichyl phosphate-D-  
mannose to specific serine/threonine residues of proteins in the secretory  
pathway; acts in complex with Pmt2p 1 0.840604226 0.593406384 0.789460359  
0.389582761 1 0.868250193 0.854979424 0.548926361 0.584168621 1  
0.931427768 0.710997992 0.415938882 0.702063046 1 1.168692586  
0.872942102 1.062220548 0.627335924 1 0.889061357 0.526709322  
0.286094298 0.5343709 1 0.984612158 0.816885281 1.087056821  
1.426813811 0.915676589 1 0.706926757 0.485652205 0.512128795  
0.646100052 0.233617427 1 0.70654121 0.550026743 0.801300633  
0.508267793 0.513888531 0.711882332  
YPR191W YPR191W::QCR2::40 kDa ubiquinol cytochrome-c reductase core protein  
2 1 1.037338344 1.223344374 1.192202938 1.176798455 1 1.521733761  
1.499648127 0.98770509 1.171158167 1 0.674397023 0.807793606  
1.213946202 0.859426891 1 0.475099619 0.851456448 1.648751769 1  
1.127260758 0.446091015 0.965738944 2.039800606 1 0.624020889  
0.317509273 0.346413981 0.952618309 1 0.440083624 0.127380945  
0.203990913 0.316985903 0.598803225 1 0.36500771 0.134093719  
0.396872439 0.745151174 0.794088958 0.90276836  
YDL097c "YDL097c::RPN6::Regulatory Particle Non-ATPase, homolog of mammalian  
proteasomal subunit S9/p44.5." 1 0.656634156 0.816004388 0.89751029  
0.717565996 1 0.780303393 0.879925915 0.973260816 0.806303407 1

|             |                                                                                                                          |             |             |             |             |
|-------------|--------------------------------------------------------------------------------------------------------------------------|-------------|-------------|-------------|-------------|
| 0.814784234 | 1.066019326                                                                                                              | 1.098124488 | 0.763579418 | 1           | 1.260780463 |
| 1.583990089 | 1.68387883                                                                                                               | 1.574743037 | 1           | 1.830211298 | 1.523182484 |
| 2.109166988 | 1.542963061                                                                                                              | 1           | 1.062128324 | 1.227959537 | 1.62559789  |
| 0.88779389  | 1.057871339                                                                                                              | 1           | 1.072644499 | 1.308379508 | 1.181474835 |
| 0.809728893 | 0.719069716                                                                                                              | 1           | 1.373412969 | 1.485303673 |             |
| 1.071763756 |                                                                                                                          |             |             |             |             |
| YPR193C     | YPR193C::HPA2::Histone and other Protein Acetyltransferase; Has sequence homology to known HATs and NATs 0.897608189     |             |             |             |             |
| 0.962326508 | 0.92499619                                                                                                               | 0.923511095 | 1.022196435 |             |             |
| 0.822241002 | 1.145507452                                                                                                              | 1.131171882 | 1.114089493 | 1           | 0.728545823 |
| 1.185357456 | 0.267758415                                                                                                              |             |             | 1           | 0.700842469 |
| 0.770844687 | 1.087354371                                                                                                              | 1.122988231 | 1           | 0.844498556 | 0.737013592 |
| 1.117854431 | 1.23434422                                                                                                               | 0.737443112 | 0.627714117 | 1.08544134  |             |
| 0.507150204 | 1.176429                                                                                                                 | 1.001713903 |             |             |             |
| YDL111c     | YDL111c::RRP42::Ribosomal RNA Processing 1 0.968976478                                                                   |             |             |             |             |
| 0.839100174 | 0.731624346                                                                                                              | 0.878886976 | 1           | 0.71875978  | 0.711585398 |
| 0.953762905 | 1.028179392                                                                                                              | 1           | 0.704033088 | 0.630489808 | 0.764615118 |
| 0.788639003 | 1                                                                                                                        | 0.620537528 | 0.422510346 | 0.63069878  | 1.167773851 |
| 1.227448952 | 1.389757795                                                                                                              | 1.459412024 | 1.273917205 | 1           | 0.976568854 |
| 0.832961598 | 0.789002983                                                                                                              | 0.926021521 | 0.900971774 | 1           | 0.77783836  |
| 0.793517786 | 0.48176504                                                                                                               | 0.598809693 | 0.966649778 | 1           | 0.796912532 |
| 0.774652549 | 0.836734029                                                                                                              | 1.170557201 | 0.663179496 | 1.111166903 |             |
| YPR195C     | YPR195C::YPR195C::molecular_function unknown 1 1.521705055                                                               |             |             |             |             |
| 1.269498097 | 1.146958719                                                                                                              | 1.194145582 | 1           | 1.485822775 | 1           |
| 0.859729413 | 0.946409794                                                                                                              | 1.133689453 | 1.113106801 |             |             |
|             |                                                                                                                          | 1           | 1.435120581 | 1.930199655 |             |
| 1.823663851 | 1.586218195                                                                                                              | 1           | 0.912498421 | 0.897935633 | 1.600367312 |
| 1.585963294 | 1                                                                                                                        | 0.564663853 | 0.760394242 | 0.570694328 | 0.686078277 |
| 0.491055523 | 0.845852802                                                                                                              |             |             |             |             |
| YHL006C     | YHL006C::SHU1::suppressor of HU sensitivity involved in recombination 1 1.421171784 1.409234069 1.194409299 1.31328615 1 |             |             |             |             |
| 1.106868261 | 1.165678486                                                                                                              | 1.558723622 | 1.473076107 | 1           | 1.026944801 |
| 1.333820245 | 1.833495356                                                                                                              | 1.430112226 | 1           | 0.994521715 | 1.954430994 |
| 1.803841499 | 0.381846787                                                                                                              | 1.036588998 |             | 0.327227333 | 1           |
|             | 1.453414311                                                                                                              | 1.054479237 | 1           | 0.843740418 | 0.7596361   |
| 0.947605552 | 1.593882911                                                                                                              | 1           |             | 0.921084968 | 1.106999177 |
| 1.189097427 |                                                                                                                          |             |             |             |             |
| YDL113c     | YDL113c::CVT20::Cytoplasm to vacuole targeting 1 0.834104472                                                             |             |             |             |             |
| 0.925543856 | 1.045419877                                                                                                              | 0.859573631 | 1           | 0.96139239  | 1.05051387  |
| 0.937136959 | 0.806975555                                                                                                              | 1           | 1.254336806 | 1.377778615 | 1.030408849 |
| 1.050509953 | 1                                                                                                                        | 1.280510991 | 1.475009782 | 1.275459366 | 1           |
| 2.654034779 | 2.453403749                                                                                                              | 1.683499434 | 1.359839494 | 1           | 1.242497937 |
| 0.770750038 | 1.388037431                                                                                                              | 1           | 1.187773029 | 1.220980848 | 1           |
| 1.399817338 | 1.314231157                                                                                                              | 1.408258179 | 0.873691053 | 1.401524878 |             |
| YHL008C     | YHL008C::YHL008C::molecular_function unknown 1 1.161315779                                                               |             |             |             |             |
| 0.946008538 | 1.227679477                                                                                                              | 0.787967627 | 1           | 1.214388656 | 1.184443991 |
| 0.895561578 | 0.825957698                                                                                                              | 1           | 0.995289928 | 1.039085518 | 0.979161011 |
| 0.945580495 | 1                                                                                                                        | 1.33642924  | 1.665136088 | 0.875986954 | 1           |
| 0.895300367 |                                                                                                                          | 0.382343734 | 1           | 0.956379817 | 0.997456157 |
| 1.095835851 | 1.005389426                                                                                                              | 0.881696564 | 1           | 0.862663454 | 0.638829556 |
| 0.751756272 | 0.829208589                                                                                                              | 1           |             | 1.343485746 | 0.879760977 |
| 1.162159445 | 0.727643518                                                                                                              |             |             |             |             |
| YDL115c     | YDL115c::IWR1::Interacts with RNA Polymearse II 1 0.894323498                                                            |             |             |             |             |
| 1.237798918 | 0.894168747                                                                                                              | 1.3159102   | 1           | 0.81684524  | 1.422344841 |
| 1.353117283 | 1                                                                                                                        | 1.068764603 | 1.364934854 | 1.081273444 | 1           |
| 1.297703256 | 0.95243751                                                                                                               | 1.032676113 | 1.689433216 | 1           | 2.465763762 |
| 3.828725819 | 4.355112991                                                                                                              | 1.168859995 | 1           | 1.075600605 | 1.246708023 |



0.847848152 0.88247982 1.056241382 1 1.042848299 1.476477266  
 0.963060814 0.907947508 1 1.22827508 1.256846036 1.192727549  
 1.220083189 1.477319299 1.232878585  
 YDL117w YDL117w::CYK3::involved in CYtoKinesis 1 0.721514049  
 0.749950342 1.042104297 0.681367393 1 0.952712545 0.98690526  
 0.915854666 0.732963698 1 0.773764501 0.841585389 0.514269139  
 0.782847023 1 0.818743664 0.713122759 0.851682191 0.697106599 1  
 0.701585864 0.778359286 0.64469491 0.780618405 1 0.813550168  
 0.798574765 0.825877931 0.872859776 0.873450605 1 0.916833208  
 0.767438563 0.632600688 0.57320894 0.950388249 1 0.872091905  
 0.791296289 0.784894136 0.529764627 1.053574876  
 YHL010C YHL010C::molecular\_function unknown 1 1.189787786  
 1.419561628 1.750345277 1.240577192 1 1.544296719 1.414644266  
 1.324219732 1.245156585 1 1.313118546 1.705393096 1.395344799  
 1.367635889 1 0.85788072 0.837143102 0.706766862  
 0.444711793 1 0.828148399 1.288995177 1.03398913  
 0.869092568 1.001650115 1 1.138206784 0.844434124 0.923778228  
 1.141416225 1.119784946 1 1.281263252 1.410345032 0.861117731  
 1.445198106 0.770549116  
 YHL012W YHL012W::YHL012W::UTP-glucose-1-phosphate uridylyltransferase 1  
 1.293260746 1.038956405 1.325469514 1.392392377 1 1.148411289  
 1.180545866 1.197121172 1.255300939 1 0.684494315 0.568419472  
 0.852190365 1.013889358 1 0.4380576  
 0.492471712 1 0.568299536 0.330181587 0.638524169 0.842540831  
 0.662365254 1 0.591476247 0.581422897 1  
 0.901572743 1.159483394 0.58841932  
 YHL026C YHL026C::YHL026C::molecular\_function unknown 1 1.27697112  
 1.164597158 1.155899605 1.165624363 1 1.274511008 1.252804025  
 1.11612053 1.174697085 1 0.906916575 0.900402701 0.919345063  
 0.976094156 1 1.039852717 1.20085732 1.186855693  
 0.431905948 1 1.122442223 1.008969536  
 1.23307473 0.963754733 1 0.732670872 0.896306927 0.48950923  
 1.240215237 2.508389789 1 0.953600753 0.808018655 1.332142306  
 1.054470496 1.372177602 0.939544512  
 YHL028W YHL028W::WSC4::cell wall integrity and stress response component 4  
 1 1.237751672 1.242922658 1.274816363 1.23105297 1 1.36525155  
 1.418248411 1.092022581 0.997972249 1 1.15174023 1.009116217  
 0.776324381 0.842316647 1 0.975911224 0.823117819 0.872665393  
 0.420858988 1 0.576752872 0.911595268 0.368867967 0.45438244 1  
 1.060739469 1.219033717 1.206082869 1.586396338 1.418343985 1  
 0.910707285 0.423422913 0.632053962 0.922898356 0.448160295 1  
 0.809536702 0.602583828 0.712461848 0.711026306 1.495993937 0.454448851  
 YHL030W YHL030W::ECM29::ExtraCellular Mutant 1 1.47262027  
 1.298411665 1.162434481 1 1.576360251 1.754176521 1.362632615  
 1.132259888 1 1.73377794 1.783162736 1.236923137 1.2381793 1  
 1.120694742 0.978113375 1.165384102 1.151368333 1 1.278539116  
 0.762997157 1 0.981958531 1.31452356 1.252082536 0.877026069  
 0.834114513 1 1.335119173 1.119543072 1.127537012 0.680643549  
 0.531502455 1 1.257894657 1.297501555 0.987004194 0.703304663  
 1.080569178 0.909773366  
 YHL030W YHL030W::ECM29::ExtraCellular Mutant  
 0.698451719  
 1.290477676 1 1.316331614 2.360234377 1  
 0.934933922 0.626058262 3.479729756  
 YHL032C YHL032C::GUT1::Glycerol utilization 1 1.244787794 1.123152015  
 1.518847001 0.807557031 1 1.523309205 1.619191912 0.994718408

|             |                                                                    |             |             |             |             |   |
|-------------|--------------------------------------------------------------------|-------------|-------------|-------------|-------------|---|
| 1.070442849 | 1                                                                  | 1.516897539 | 1.333546783 | 1.357749686 | 1.226645589 | 1 |
| 1.491286816 | 1.59272517                                                         | 0.743671826 | 0.711495183 | 1           | 1.337335645 |   |
| 0.826258148 | 0.653917286                                                        | 1           | 0.986536711 | 0.941497897 | 1.1533368   |   |
| 1.065313439 | 0.965778891                                                        | 1           | 0.957630028 | 0.761782948 | 1.029285938 |   |
| 1.038912672 | 0.898108494                                                        | 1           | 1.044959602 | 0.80909395  | 1.001341575 |   |
| 0.818619112 | 1.295215339                                                        | 0.625195524 |             |             |             |   |
| YHL034C     | YHL034C::SBP1::single stranded nucleic acid binding protein        |             |             |             |             | 1 |
| 1.248133922 | 1.459823833                                                        | 1.323199457 | 1.955060007 | 1           | 1.265818478 |   |
| 1.3264396   | 1.612132039                                                        | 1.944983567 | 1           | 1.205686713 | 1.419969287 |   |
| 1.788341156 | 1.34691259                                                         | 1           | 1.216826617 | 1.07300766  | 1.296523552 |   |
| 1.094225431 | 1                                                                  | 1.127528605 | 0.85782923  | 1.240228824 | 0.90606361  | 1 |
| 1.098177636 | 1.349945296                                                        | 1.221241885 | 0.982785021 | 1.007268841 | 1           |   |
| 1.234519943 | 2.103463122                                                        | 1.621516055 | 1.230131865 | 1.651246167 | 1           |   |
| 1.220530573 | 1.367400451                                                        | 1.134688061 | 1.355020119 | 1.474271176 | 1.073514981 |   |
| YHL036W     | YHL036W::MUP3::methionine uptake                                   |             |             |             |             | 1 |
| 1.111621021 | 1.132216384                                                        | 1           | 1.322359874 | 1.339306645 | 1.270565895 |   |
| 1.150182075 | 1                                                                  | 3.457276807 | 3.021773231 | 2.158808354 | 0.97177644  |   |
| 1.14291929  | 0.858721497                                                        | 0.804777716 | 0.596879746 | 1           | 2.86441369  |   |
| 1.479320011 | 0.643595202                                                        | 1           | 0.531573332 | 2.448035111 | 1.622713139 |   |
| 0.898521562 | 1.068117105                                                        | 1           | 3.467906604 | 2.811888056 | 1.901111645 |   |
| 1.798475838 | 4.347699723                                                        | 1           | 2.129148331 | 1.233486087 | 1.117079683 |   |
| 3.043758872 | 1.773138684                                                        |             |             |             |             |   |
| YDL119c     | YDL119c::YDL119C::molecular_function unknown                       |             |             |             |             | 1 |
| 1.253791825 | 0.868127181                                                        | 1.392423895 | 1           | 0.995226744 | 0.894722572 |   |
| 1.316808634 | 1.299722041                                                        | 1           | 0.906639757 | 0.816722683 | 0.929583213 |   |
| 0.953222419 | 1                                                                  | 0.966848096 | 0.564706947 | 0.382241665 | 0.96158112  | 1 |
| 1.372003111 | 1.872269115                                                        | 0.602292969 | 0.72347716  | 1           | 0.938501955 |   |
| 0.803446306 | 0.625555938                                                        | 0.826110339 | 0.869862261 | 1           | 1.023466858 |   |
| 1.47325054  | 0.778143518                                                        | 0.58467509  | 1.606060492 | 1           | 1.322330471 |   |
| 1.755035591 | 1.057158071                                                        | 2.139415079 | 1.493239185 | 1.56211325  |             |   |
| YDL121c     | YDL121c::YDL121C::molecular_function unknown                       |             |             |             |             | 1 |
| 1.565805452 | 0.986700899                                                        | 1.808346483 | 1           | 0.998152891 | 0.886265523 |   |
| 1.651925956 | 1.608291508                                                        | 1           | 1.146867232 | 1.057540387 | 1.070612487 |   |
| 1.573253981 | 1                                                                  | 0.809781937 | 0.407095252 | 0.292533273 | 0.72877873  | 1 |
| 1.447295527 | 1.268592663                                                        | 0.799027167 | 0.777633986 | 1           | 0.976316052 |   |
| 0.914425106 | 0.567616491                                                        | 0.838803393 | 1.049090394 | 1           | 1.109854345 |   |
| 1.471448851 | 1.072088277                                                        | 1.28043668  | 1.944752867 | 1           | 1.219454628 |   |
| 1.4334031   | 1.009411133                                                        | 1.805067758 | 0.946191183 | 1.253017939 |             |   |
| YDL135C     | YDL135C::RDI1::Rho GDP dissociation inhibitor with activity toward |             |             |             |             |   |
| Rho1p       | 1                                                                  | 0.869530761 | 1.232815655 | 1.024787515 | 1.797712779 | 1 |
| 1.046794733 | 1.297948792                                                        | 1.212376909 | 1           | 0.859420283 | 1.13331284  |   |
| 1.319345012 | 1.260266789                                                        | 1           | 0.985691702 | 0.712432374 | 0.694937465 |   |
| 1.383019461 | 1                                                                  | 1.22317343  | 1.478047043 | 1.973970664 | 1.228746807 | 1 |
| 0.937459    | 1.211242553                                                        | 0.736905991 | 0.68901675  | 0.880794878 | 1           |   |
| 1.067819213 | 1.581050547                                                        | 1.554577838 | 1.517847855 | 2.017033859 | 1           |   |
| 1.255650551 | 1.56841613                                                         | 1.148688366 | 1.51474711  | 1.369356337 | 1.493814518 |   |
| YDL137W     | YDL137W::ARF2::ADP-ribosylation factor 2                           |             |             |             |             | 1 |
| 1.120954676 | 1.002124574                                                        | 1.832845505 | 1           | 1.054838257 | 1.115143198 |   |
| 1.581752298 | 1.520433051                                                        | 1           | 0.942775632 | 1.080152242 | 1.435360959 |   |
| 1.127927995 | 1                                                                  | 1.344994912 | 0.932821189 | 1.054987067 | 1.761569354 | 1 |
| 1.609060905 | 1.929886806                                                        | 1.988517004 | 1.568527446 | 1           | 1.142165657 |   |
| 1.294301045 | 1.062919126                                                        | 0.9691939   | 1.07914585  | 1           | 1.332194985 |   |
| 1.980113959 | 1.481598143                                                        | 1.085188729 | 1.691404437 | 1           | 1.380013776 |   |
| 1.713019688 | 1.191778399                                                        | 1.802181495 | 1.6294238   | 2.118134378 |             |   |
| YDL139c     | YDL139c::SCM3::Suppressor of chromosome missegregation             |             |             |             |             | 1 |
| 1.0973554   | 1.41656379                                                         | 1.285390037 | 1.686086651 | 1           | 1.163435538 |   |
| 1.216126735 | 1.360158942                                                        | 1           | 0.970667436 | 1.354719784 | 1.314599604 |   |

|             |                                                                                                                                                                                                                                    |             |             |             |             |
|-------------|------------------------------------------------------------------------------------------------------------------------------------------------------------------------------------------------------------------------------------|-------------|-------------|-------------|-------------|
| 1.478701475 | 0.537953856                                                                                                                                                                                                                        | 0.613266412 | 0.737160282 |             |             |
| 0.398145123 | 0.35000254                                                                                                                                                                                                                         | 0.296827796 | 1           |             |             |
| 0.928332034 | 1                                                                                                                                                                                                                                  | 1.464136974 | 2.641917528 |             |             |
| 1.082313245 | 1.095255392                                                                                                                                                                                                                        |             |             |             |             |
| YDL141W     | YDL141W::BPL1::Biotin:apoprotein ligase                                                                                                                                                                                            | 1           | 0.907844819 |             |             |
| 0.759769772 | 0.788161641                                                                                                                                                                                                                        | 0.542975341 | 1           | 1.079397311 | 1.021402394 |
| 0.549849703 | 0.577324816                                                                                                                                                                                                                        | 1           | 1.110762318 | 0.954184814 | 0.559189086 |
| 0.547522139 | 1                                                                                                                                                                                                                                  | 1.222019267 | 1.236655635 | 1.216561547 | 0.643267078 |
| 0.76124412  | 0.835482699                                                                                                                                                                                                                        | 0.356040274 | 1           | 0.961599768 | 1.044877411 |
| 1.074454766 | 1.34196089                                                                                                                                                                                                                         | 1.005121825 | 1           | 0.915458692 | 0.610476848 |
| 0.902974465 | 0.822210303                                                                                                                                                                                                                        | 0.497526437 | 1           | 0.711963511 | 0.618103791 |
| 0.882376878 | 0.544924804                                                                                                                                                                                                                        | 0.73235142  | 0.525374421 |             |             |
| YDL143W     | YDL143W::CCT4::cytoplasmic chaperonin subunit required for actin cytoskeleton assembly or function                                                                                                                                 | 1           | 0.927430621 | 0.740725797 | 1.014146517 |
| 0.842834494 | 1                                                                                                                                                                                                                                  | 1.063272254 | 0.967318578 | 0.710368319 | 0.856846615 |
| 0.773278637 | 0.880190427                                                                                                                                                                                                                        | 0.613056627 | 0.813871129 | 1           | 1.263674383 |
| 0.921643697 | 1.237851423                                                                                                                                                                                                                        | 1.012318238 | 1           | 0.914483297 | 0.727175889 |
| 0.553069838 | 0.999109676                                                                                                                                                                                                                        | 1           | 1.107719266 | 1.102543147 | 1.141619533 |
| 0.981054752 | 0.779375543                                                                                                                                                                                                                        | 1           | 0.995226356 | 1.011419141 | 0.904329949 |
| 0.620488554 | 0.794867064                                                                                                                                                                                                                        | 1           | 1.23130574  | 1.162218622 | 0.894387067 |
| 0.838526634 | 0.784970759                                                                                                                                                                                                                        | 1.063883189 |             |             |             |
| YHL050C     | YHL050C::YHL050C::molecular_function unknown                                                                                                                                                                                       | 1           | 0.869241007 |             |             |
| 0.835894498 | 1.006997286                                                                                                                                                                                                                        | 0.461011943 | 1           | 1.167261745 | 1.125982629 |
| 0.715744052 | 0.61311061                                                                                                                                                                                                                         | 1           | 1.034082608 | 0.870576984 | 0.422118605 |
| 0.773482455 | 1                                                                                                                                                                                                                                  | 0.76330602  | 0.668887523 | 0.82016609  | 0.598389656 |
| 0.536876074 | 0.420793851                                                                                                                                                                                                                        | 0.503947038 | 0.734634162 | 1           | 0.835465428 |
| 0.918648767 | 1.410695577                                                                                                                                                                                                                        | 1.023226432 | 1.0941353   | 1           | 0.725801617 |
| 0.662366726 | 0.833334724                                                                                                                                                                                                                        | 1.254992806 | 0.932019247 | 1           | 0.738309231 |
| 0.724390871 | 1.712357294                                                                                                                                                                                                                        | 0.747190497 | 0.946315633 | 0.709255442 |             |
| YDL145C     | YDL145C::COP1::alpha subunit of the coatamer complex; gamma-alpha-COP                                                                                                                                                              | 1           | 0.987050017 |             |             |
| 1.092529886 | 0.570542833                                                                                                                                                                                                                        | 0.528850497 | 1           | 0.952535808 | 0.833008879 |
| 0.380335291 | 0.734643937                                                                                                                                                                                                                        | 1           | 1.013259723 | 0.838239902 | 0.946579845 |
| 0.724977116 | 1                                                                                                                                                                                                                                  | 0.693800828 | 0.559476504 | 0.305702761 | 0.639081133 |
| 1.181205097 | 1.026247124                                                                                                                                                                                                                        | 1.222494499 | 1.494084263 | 0.929122727 | 1           |
| 0.872228763 | 0.53964824                                                                                                                                                                                                                         | 0.701555319 | 0.706888341 | 0.565800002 | 1           |
| 0.766040554 | 0.729372771                                                                                                                                                                                                                        | 1.061651081 | 0.689253092 | 0.694369817 |             |
| YDL159W     | "YDL159W::STE7::Serine/threonine/tyrosine protein kinase of the pheromone pathway, homologous to MAP kinase kinase family"                                                                                                         | 1           | 0.833544789 |             |             |
| 0.927780636 | 0.899807809                                                                                                                                                                                                                        | 0.972982966 | 1           | 0.880898079 | 0.877524378 |
| 0.944239136 | 0.939520152                                                                                                                                                                                                                        | 1           | 0.774168002 | 0.850301117 | 0.777512004 |
| 0.939703072 | 1                                                                                                                                                                                                                                  | 1.142957444 | 0.754517228 | 0.889635852 | 1.587707277 |
| 1.403721661 | 0.856688246                                                                                                                                                                                                                        | 1.445649968 | 1           | 0.985767925 |             |
| 0.83584738  | 0.919393389                                                                                                                                                                                                                        | 1           | 1.084273943 | 1.037963074 | 1.037706051 |
| 0.89038073  | 1.059923379                                                                                                                                                                                                                        | 1           | 1.03788732  | 1.194502432 |             |
| 1.002925951 | 1.243386042                                                                                                                                                                                                                        |             |             |             |             |
| YHR002W     | "YHR002W::LEU5::mitochondrial carrier protein, involved in the accumulation of CoA in the mitochondrial matrix; homologue of human Graves disease protein; LEU5 does not encode an alpha-IPM synthase, as was first hypothesized." | 1           | 0.898732818 | 1           |             |
| 0.932016158 | 0.836504373                                                                                                                                                                                                                        | 0.869552854 | 1           | 0.984614649 | 1.06598514  |
| 1           | 1.557629532                                                                                                                                                                                                                        | 1.313670895 | 0.921461115 | 1.003814461 | 1           |
| 1.220450438 | 1.267032211                                                                                                                                                                                                                        | 0.579908612 | 1           | 1.228673222 | 1.272069195 |
| 1.15655194  | 1.163832625                                                                                                                                                                                                                        | 1.204028302 | 1.060713884 | 1.095323371 |             |
| 0.908005929 | 1.446988464                                                                                                                                                                                                                        | 1           | 1.165071085 | 1.204293506 | 1.220822849 |
| 0.624181236 | 1.643847415                                                                                                                                                                                                                        | 1.056878183 |             |             |             |

YDL161w YDL161w::ENT1::epsin N-terminal homology-containing protein 1  
1.247353913 1.332489787 2.12029381 1.260740895 1 1.639633993  
1.436081788 1.752351803 1.575071932 1 1.146735322 1.710278453  
1.508437247 1.597759363 1 0.784037746 2.186059184 1.577646665 1  
0.79322636 0.388939832 0.137887747 0.366285812 1 1.069842633  
1.139694707 1.119301601 1.545994879 1.341067548 1 0.892790956  
0.6080488 0.747480559 0.994004657 0.561912529 1 0.663208363  
0.532983604 0.815819698 0.544872897 0.772474993 0.694369817  
YHR004C YHR004C::NEM1::Nuclear Envelope Morphology 1 0.902434626  
0.914377151 1.101506122 0.900913118 1 1.028198542 0.978016034  
0.942543335 1 1.144253208 1.227071434 0.836015831 1.250622013 1  
1.806964074 1.30169591 0.894683444 1 1.103483094  
1 1.293616974 1.701606081 1.516132788 1.277545392 1.123267352 1  
0.951725831 1.206846097 1.352152392 1.253757233 1.141621481 1  
1.451701734 1.769853632 0.558013123 1.462016139 0.789812857  
YHR006W YHR006W::STP2::Involved in pre-tRNA splicing and in uptake of  
branched-chain amino acids 1 0.925932412 0.891424227 1.129039758  
0.855598303 1 1.010636739 1.13121826 0.909258514 0.93438057 1  
1.231444423 1.093825071 0.880005415 1.298999251 1 1.410664413  
1.328908618 0.873318994 1 1.35046089 1.212601866 1.318821084 1  
1.001062666 1.043127064 0.949044354 0.860349306 0.857976644 1  
1.124065152 0.914495076 1.423492735 1.151132014 1 1.191892939  
0.823428095 1.184778688 0.522017416 0.970922549 0.750409762  
YHR008C YHR008C::SOD2::Manganese-containing superoxide dismutase  
0.928136667 0.781584055 0.733247794 0.665139926  
0.873513309 0.957271844 0.815499836 0.777317295 1  
2.041026632 1.110577859 0.491278463 1  
1.715332779 1.813706645 1.984237434 1.02827464 0.757010313 1  
1.317972488 2.028050048 1.353196059 1.479888794 1.263494789 1  
1.413895608 1.959414541 1.838572116 0.777663732 1.162852056 1.163704293  
YHR010W YHR010W::RPL27A::Homology to mammalian L27 1 1.12962676  
1.243478673 0.967435922 1.612703737 1 1.070530499 0.899494846  
1.383847315 1.242605657 1 0.819908865 0.846107569 1.626849706  
0.68088165 1 0.684578305 0.641223913 0.20020121 0.530580535 1  
1.390600284 0.716176434 0.643992343 0.984555931 1 0.951818594  
0.892492986 0.670754561 0.968868715 0.95948964 1 0.975808391  
1.392060308 0.853264613 0.600913398 1.658425609 1 0.935900045  
1.140598351 0.849493403 1.50125542 1.19306679 1.349336592  
YHR024C YHR024C::MAS2::53 kDa subunit of the mitochondrial processing  
protease 1 0.894292698 0.721212692 0.979457257 0.624119142 1  
0.977932727 0.697721117 1 0.923570783 0.866603555 0.583939636  
0.678764114 2.074566049 1.245023077 1.39114644  
1.721802961 0.745852068 1.011637544 1.255639739 1 1.274599787  
1.007571764 1.095322668 1.018478187 0.858800213 1 1.107946029  
0.904312837 0.801717716 0.605261249 0.593363381 1 1.300084476  
1.293152959 1.103822025 0.705486088 1.133014159 0.835345293  
YHR024C YHR024C::MAS2::53 kDa subunit of the mitochondrial processing  
protease  
3.052873121  
1.96887415  
YHR026W YHR026W::PPA1::vacuolar ATPase V0 domain subunit c'' 1  
1.28531641 0.899599287 0.762109091 0.856734015 1 0.794165798  
0.847669349 0.888835899 0.884469006 1 0.934427825 0.866155962  
1.00429251 0.754718736 1 0.973983499 0.673065148 0.753634035  
0.920904322 1 1.119290354 0.868881128 0.995119383 0.827197344 1  
1.065774069 1.134041556 1.109872371 1 1.264936834 0.742404081

|         |                                                                                                |             |             |             |             |             |             |
|---------|------------------------------------------------------------------------------------------------|-------------|-------------|-------------|-------------|-------------|-------------|
|         | 0.92006834                                                                                     | 0.93208774  | 0.745230665 | 1           | 0.799509239 | 0.77243489  |             |
|         | 0.873699203                                                                                    | 0.565099699 | 0.788013303 | 0.974569543 |             |             |             |
| YHR028C | YHR028C::DAP2::Dipeptidyl aminopeptidase B (DPAP B)                                            |             |             |             |             | 1           |             |
|         | 0.623173006                                                                                    | 0.888750632 | 0.536321075 | 1           | 0.770034005 | 0.816859201 |             |
|         | 0.690210863                                                                                    | 0.632927128 | 1           | 0.837386497 | 0.869193852 | 0.555251118 |             |
|         | 0.815699098                                                                                    | 1           | 1.276460177 | 1.367983508 | 1.652725786 | 1.218053195 | 1           |
|         | 1.392722011                                                                                    | 0.994901426 | 1.316080658 | 1.361913007 | 1           | 0.907010111 |             |
|         | 0.999512557                                                                                    | 0.625675592 | 0.538239852 | 0.895207884 | 1           | 1.161529341 |             |
|         | 1.731616315                                                                                    | 1.354854201 | 1.22112353  | 1.903650732 | 1           | 1.085464561 |             |
|         | 1.576986698                                                                                    | 1.074326711 | 1.223625969 |             | 1.34320725  |             |             |
| YHR030C | YHR030C::SLT2::Suppressor of <i>lyt2</i>                                                       |             |             |             |             | 0.840969056 | 1.024936173 |
|         | 1.101373826                                                                                    | 0.865408599 | 1.012168639 | 1.012708194 |             | 1.025913539 |             |
|         | 0.993440769                                                                                    | 1.184643045 | 1.216477216 | 1.157165038 | 1           | 0.984271939 |             |
|         | 1.206339913                                                                                    | 1.262787519 | 1.25382543  | 1           | 1.490020804 | 1.45512228  |             |
|         | 1.750502079                                                                                    | 1.100853755 | 1           | 1.303703125 | 1.272866742 | 1.441217289 |             |
|         | 1.246418482                                                                                    | 1.14788698  | 1           | 0.837204295 | 1.047647025 | 0.99951107  |             |
|         | 0.637778388                                                                                    | 0.55232892  | 1           | 1.117513693 | 1.255934077 | 1.043211876 |             |
|         | 0.789978052                                                                                    | 1.009407501 | 0.872121497 |             |             |             |             |
| YHR030C | YHR030C::SLT2::Suppressor of <i>lyt2</i>                                                       |             |             |             |             |             | 1.021910989 |
|         | 0.718798121                                                                                    | 4.019114294 |             |             |             |             |             |
| YDL163w | YDL163w::YDL163W::molecular_function unknown                                                   |             |             |             |             | 1           | 1.225347467 |
|         | 1                                                                                              | 1.77317607  | 1.840705325 |             | 1.179502952 | 1           |             |
|         | 1.139029399                                                                                    | 0.991667232 | 0.6803626   | 1.618293086 |             | 0.575761674 |             |
|         |                                                                                                |             |             |             | 0.981484476 | 0.996794232 |             |
|         | 1                                                                                              | 0.957238013 | 0.771757754 |             | 1.031422226 | 0.608197438 | 1           |
| YDL165W | YDL165W::CDC36::Required for Start B in mitosis and for meiosis I spindle pole body separation |             |             |             |             |             |             |
|         | 1.448968994                                                                                    | 1.553692995 | 2.075031974 | 2.072084333 | 1           | 1.21184306  |             |
|         | 1.488800974                                                                                    | 2.241281105 | 1.563878214 | 1           | 0.851352479 | 0.629578453 |             |
|         | 0.57276005                                                                                     | 1.042318748 | 1           | 1.268281623 | 1.744872187 | 1.027486325 |             |
|         | 1.007616483                                                                                    | 1           | 1.3275409   | 1.270521628 | 1.205203854 | 1.040500934 |             |
|         | 1.161713532                                                                                    | 1           | 1.167089196 | 1.232040109 | 1.305695496 | 1.049623998 |             |
|         | 0.974215277                                                                                    | 1           | 1.193718255 | 1.283664777 | 1.006854752 | 1.263469001 |             |
|         | 0.970985033                                                                                    | 1.28629164  |             |             |             |             |             |
| YDL167C | YDL167C::NRP1::asparagine-rich protein                                                         |             |             |             |             | 1           | 0.731644591 |
|         | 0.613844674                                                                                    | 0.980192404 | 0.821697905 | 1           | 0.741123845 | 0.726677045 |             |
|         | 0.791116915                                                                                    | 0.86057858  | 1           | 0.394927429 | 0.35784737  | 0.249606485 |             |
|         | 0.856800683                                                                                    | 1           | 0.182019387 |             | 0.209164086 | 0.437802313 | 1           |
|         | 0.219832919                                                                                    | 0.323956584 | 0.187047205 | 0.479447754 | 1           | 0.588687367 |             |
|         | 0.493345856                                                                                    | 0.578395585 | 0.78995861  | 0.803929757 | 1           | 0.549911954 |             |
|         | 0.498189321                                                                                    | 0.44516722  | 0.860294218 | 0.552964932 | 1           | 0.493362757 |             |
|         | 0.566513238                                                                                    | 0.932757905 | 0.811684887 | 0.514219329 | 0.661096116 |             |             |
| YDL169C | YDL169C::UGX2::Product of gene unknown                                                         |             |             |             |             | 1           | 1.205257899 |
|         | 1.705628304                                                                                    | 1.622712899 | 1.549613568 | 1           | 1.473916001 | 2.100989895 |             |
|         | 1.777030983                                                                                    | 1           | 1.495721981 | 1.936379918 | 3.274126165 | 1.670948249 | 1           |
|         | 3.045005744                                                                                    | 2.537004622 | 2.558470967 | 3.218299876 | 1           | 1.471901832 |             |
|         | 2.508368955                                                                                    | 2.708989463 | 1.011970272 |             | 0.801165247 | 1.243461706 |             |
|         | 0.57494611                                                                                     | 0.719567719 | 1           | 0.833214179 | 1.315707167 |             | 2.111911485 |
|         | 1                                                                                              | 1.301963149 | 1.639585817 | 1.701861426 |             | 1.433396457 |             |
| YDL183c | YDL183c::YDL183C::molecular_function unknown                                                   |             |             |             |             | 1           |             |
|         | 1.64984492                                                                                     | 1.541090867 | 1.689653281 | 1           | 1.547333041 | 1.520732181 |             |
|         | 1.543936133                                                                                    | 1.793079169 | 1           | 2.520827379 | 1.906741765 | 1.863151153 |             |
|         | 1.663621897                                                                                    | 1           | 1.313282357 | 1.520184382 | 1.323022261 | 1.351299814 | 1           |

|         |                                                                                                                                                                                                                                        |             |             |             |             |             |
|---------|----------------------------------------------------------------------------------------------------------------------------------------------------------------------------------------------------------------------------------------|-------------|-------------|-------------|-------------|-------------|
|         | 2.790113544                                                                                                                                                                                                                            | 5.388292944 | 5.112069119 | 1.99998989  | 1           | 1.419438233 |
|         | 1.170614535                                                                                                                                                                                                                            | 0.940159386 | 0.839930715 | 0.939405122 | 1           | 1.352453266 |
|         | 1.737920808                                                                                                                                                                                                                            |             | 1.371912966 |             |             | 0.846665068 |
|         | 0.77382794                                                                                                                                                                                                                             |             | 1.036738829 |             |             |             |
| YDL185W | YDL185W::TFP1::Encodes a protein with three regions (ABC) that is spliced to yield the extein AC & the intein B; AC is a 69K vacuolar (H+)-ATPase & B is a 50K site-specific endonuclease named VDE (PI-SceI) that is homologous to HO |             |             |             |             |             |
| 1       | 1.066808332                                                                                                                                                                                                                            | 0.817915418 | 1.155435289 | 0.715864374 | 1           | 1.301385631 |
|         | 1.475784068                                                                                                                                                                                                                            | 0.809170895 | 1           | 1.02200018  | 0.905227362 | 0.643258323 |
|         | 0.837052242                                                                                                                                                                                                                            | 1           | 0.974756635 | 0.723429365 | 0.77445263  | 0.495279107 |
|         | 0.562404023                                                                                                                                                                                                                            | 0.432833509 | 0.461200805 | 0.455597447 | 1           | 0.878059919 |
|         | 0.669074529                                                                                                                                                                                                                            | 0.778013146 | 0.941069199 | 0.685107018 | 1           | 1.075333616 |
|         | 0.675141141                                                                                                                                                                                                                            | 0.90672567  | 0.784711506 | 0.496679517 | 1           | 0.839122522 |
|         | 0.716939221                                                                                                                                                                                                                            | 0.686616644 | 0.684253006 | 0.763706411 | 0.774927232 |             |
| YDL187c | YDL187c::YDL187C::molecular_function unknown                                                                                                                                                                                           |             |             |             |             |             |
| 1       | 1.492861896                                                                                                                                                                                                                            | 1.462498773 | 1.583425696 | 1           | 1.504059872 | 1.409390238 |
|         | 1.454508023                                                                                                                                                                                                                            | 1           | 1.022538926 | 1.301625443 | 1.649562201 | 1.320501101 |
|         | 1.239723889                                                                                                                                                                                                                            | 2.212069412 | 1           | 1.210995802 | 1.994056349 |             |
|         | 0.958588638                                                                                                                                                                                                                            | 1           | 0.840286579 |             | 1.044430286 | 0.971723883 |
|         | 0.706418024                                                                                                                                                                                                                            | 1.053944512 | 1.405830563 | 1.378173813 | 1.572036919 | 1           |
|         | 0.901070964                                                                                                                                                                                                                            | 1.432199483 | 1.514732981 | 0.959719608 | 1.693136803 | 1.205734225 |
| YDL189w | YDL189w::RBS1::RNA-Binding Suppressor of PAS kinase                                                                                                                                                                                    |             |             |             |             |             |
| 1       | 0.64776305                                                                                                                                                                                                                             | 0.759191556 | 0.763721638 | 0.592509141 | 1           | 0.837697172 |
|         | 0.856647444                                                                                                                                                                                                                            | 0.628342747 | 0.667897789 | 1           | 0.787279957 | 0.779463423 |
|         | 0.664202847                                                                                                                                                                                                                            | 0.690718122 | 1           | 0.838805129 | 0.766244666 | 0.674279438 |
|         | 1.206889752                                                                                                                                                                                                                            | 1.107961102 | 0.875867796 | 1.492067808 | 1           | 0.98583359  |
|         | 1.044587589                                                                                                                                                                                                                            | 0.997691933 | 0.974699068 | 1.110596318 | 1           | 1.026330443 |
|         | 0.801872472                                                                                                                                                                                                                            | 1.267150057 | 1.187923894 | 1.009572078 | 1           | 0.758958248 |
|         | 1.213585679                                                                                                                                                                                                                            | 0.845075016 | 0.910965752 | 1.056002518 |             |             |
| YHR032W | YHR032W::YHR032W::not yet annotated                                                                                                                                                                                                    |             |             |             |             |             |
| 1       | 0.881903985                                                                                                                                                                                                                            | 0.312029603 | 1           | 0.789540102 | 0.822626293 | 0.567246968 |
|         | 0.662736429                                                                                                                                                                                                                            | 1           | 0.710497775 | 0.43400535  | 0.277663403 | 0.740380926 |
|         | 0.313309368                                                                                                                                                                                                                            | 0.194070121 | 0.323828055 | 0.359702474 | 1           | 0.658706938 |
|         | 0.535700567                                                                                                                                                                                                                            | 0.511506811 | 0.400299717 | 1           | 0.445257015 | 0.517611791 |
|         | 0.485402484                                                                                                                                                                                                                            | 0.363867487 |             | 0.850701175 |             | 1           |
|         | 1.276713069                                                                                                                                                                                                                            | 1.26520097  | 0.960954739 | 0.951446521 |             | 32.8359     |
| YHR032W | YHR032W::YHR032W::not yet annotated                                                                                                                                                                                                    |             |             |             |             |             |
|         |                                                                                                                                                                                                                                        |             |             | 0.817142899 | 0.760251203 |             |
|         | 1.129531538                                                                                                                                                                                                                            | 1           | 0.952604494 | 0.696073402 |             | 2.048731485 |
|         | 0.577232917                                                                                                                                                                                                                            |             | 1.216123699 | 0.539384381 |             |             |
| YDL191W | YDL191W::RPL35A::Homology to rat L35                                                                                                                                                                                                   |             |             |             |             |             |
| 1       | 1.215824645                                                                                                                                                                                                                            | 0.757124157 | 1.637655886 | 1           | 0.868180324 | 0.831498622 |
|         | 1.208144848                                                                                                                                                                                                                            | 1.173080121 | 1           | 0.789873475 | 0.811277853 | 0.837947094 |
|         | 0.87799706                                                                                                                                                                                                                             | 1           | 0.732597523 | 0.270437435 | 0.178671314 | 0.772302418 |
|         | 1.618065312                                                                                                                                                                                                                            | 1.04908678  | 0.785825363 | 0.796421765 | 1           | 0.817981408 |
|         | 0.899627068                                                                                                                                                                                                                            | 0.541681952 | 0.681969325 | 0.878122922 | 1           | 1.424576236 |
|         | 1.778758912                                                                                                                                                                                                                            | 1.229488501 | 1.130009105 | 2.531645018 | 1           | 0.977448845 |
|         | 1.341486293                                                                                                                                                                                                                            | 1.106353226 | 2.048982216 | 1.194994131 | 1.274032958 |             |
| YHR034C | YHR034C::YHR034C::molecular_function unknown                                                                                                                                                                                           |             |             |             |             |             |
| 1       | 0.95521135                                                                                                                                                                                                                             | 0.736488621 | 0.774116206 | 1           | 0.832774177 | 0.92788883  |
|         | 0.918178252                                                                                                                                                                                                                            | 1.091332642 | 1           | 1.002981255 | 0.964293051 | 1.649640792 |
|         | 0.952971632                                                                                                                                                                                                                            | 1           | 1.292405912 |             | 0.767395659 | 1.582160182 |
|         | 1.052472014                                                                                                                                                                                                                            | 2.003766299 | 1.199002165 |             | 0.788611334 | 1.537990075 |
|         | 1.022449876                                                                                                                                                                                                                            | 0.603786215 |             |             |             | 1           |
|         |                                                                                                                                                                                                                                        |             | 3.232803731 |             |             |             |

YHR034C YHR034C::YHR034C::molecular\_function unknown 1 1.302189287  
1.474782716 1.417547087 1.352403164 1.39739922 1 1.01760856  
1.371363178 1.061155819 1.260287473 0.976297842 1 1.574788264  
1.604046222 1.616368736 1.360261146 1.04024128  
YDL193w YDL193w::YDL193W::molecular\_function unknown 1 0.819617347  
0.917760817 0.986275471 0.81944711 1 0.950559675 0.985956262  
0.719121638 1 0.898552444 0.964102825 0.86081202 0.887258208 1  
1.37031138 1.058235617 0.971595818 1.003367675 1 1.84824956  
1.113882577 0.944796345 1.738747472 1 1.257844767 1.274999117  
1.458423878 1.210927634 1.092523718 1 1.158808208 1.234055158  
1.531754869 1.056017383 0.947050991 1 1.118419685 0.941002474  
1.013694783 0.837507811 0.921537751 0.985952665  
YHR047C YHR047C::AAP1':::arginine/alanine aminopeptidase 1 1.003239788  
0.843819005 1.01250289 0.531188618 1 1.052182623 0.920352662  
0.8108635 0.587431997 1 1.246151511 0.984126999 0.3835567  
0.57474042 1 1.169232308 0.802129486 0.651056704 0.480581591 1  
1.169306883 0.643400694 0.474642557 0.621562301 1 1.121856816  
1.232648718 0.937079135 1.070014643 1 0.861944251 1.146210054  
1.420630188 1.185384704 1.855343029 1 1.122819552 1.119173455  
1.311917493 0.318600251 2.300146915 1.346709701  
YHR049W YHR049W::FSH1 1 1.257710937 1.178404081 1.088603964  
1.566371846 1 1.143313263 1.114649361 1.536689476 1.486439651 1  
0.995787524 0.84548184 0.91543782 1.066404666 1 1.134419068  
0.808861913 0.806695159 1.191809969 1 1.292711285 0.907178937  
0.618491408 0.993310234 1 1.193858889 0.877773523 1.045755242  
1.331497449 0.756812638 1 0.588054348 0.764732768 0.58983164  
0.332776155 0.459694238 1 0.867626047 0.838405598 0.867547885  
1.089366364 1.006079884 1.01222136  
YHR051W YHR051W::COX6::subunit VI of cytochrome c oxidase  
1.174647793 1.208285886 1.036521327 1.522296744 1.300321873  
1.075315948 1.208381761 1.281152932 0.64139623 0.77742201  
1.127666159 0.760674463 1 0.91110142 0.624914838 0.786412924  
1.642504365 1 1.612933878 1.036249928 1.607512227 1.609642587 1  
0.765440371 0.795723581 0.740292944 0.772815527 0.904415134 1  
1.079504355 1.320060133 0.905372147 1.092663553 1.483069711 1  
0.996488115 1.135479993 1.04236408 1.600009161 1.007862314 0.951803299  
YAL021C YAL021C::CCR4::carbon catabolite repression; transcriptional  
regulator for some glucose-repressed genes including ADH2 1 1.104860005  
1.093097148 1.053444703 0.753977173 1 1.154549338 1.271780757  
1.070177506 1.052404832 1 1.227592243 1.19493304 1.228822612  
1.154965558 1 0.877174645 0.734204285 0.706026273 0.561755632 1  
0.910947663 0.945470322 0.891324862 1.059723668  
0.912855884 1 0.915384494 0.700729056 0.940348463 0.851503841  
0.536740195 0.837435399 0.94676342 0.722958828 0.877616024  
0.823962171  
YHR053C YHR053C::CUP1-1::copper-binding metallothionein 1 0.936602572  
1.392864888 0.789358382 1.432626961 1 0.852119021 0.884999772  
1.61344811 1.1897433 1 1.464235741 1.489992288 1.306383872  
0.87597897 1 0.99739887 0.540545751 0.340132424 0.633748994 1  
2.643953236 2.470962387 1.759998663 1.690488254 1 0.923657454  
0.95004952 0.92548837 0.936417763 0.851565858 1 1.007098945  
0.989888501 1.159717165 1.814045102 1.558551879 1 0.874625109  
0.772214786 0.852650902 0.861845912 1.044003765 0.679484244  
YHR055C YHR055C::CUP1-2::copper-binding metallothionein 1 0.897089639  
1.320800419 0.668407604 1.214436017 1 0.720039963 0.671184009

|             |                                                                                                 |             |             |             |             |             |
|-------------|-------------------------------------------------------------------------------------------------|-------------|-------------|-------------|-------------|-------------|
| 1.440581961 | 0.983758417                                                                                     | 1           | 1.400755173 | 1.449390021 | 1.25141552  |             |
| 0.728276338 | 1                                                                                               | 0.664508137 | 0.507632387 | 0.359144493 | 0.484588508 | 1           |
| 2.490736434 | 4.850407465                                                                                     | 3.408782931 |             | 1           | 0.809915639 | 0.712993387 |
| 0.646959188 | 0.850205386                                                                                     | 0.969257728 | 1           | 0.690715374 | 0.895401086 |             |
| 0.415678968 | 1.303071018                                                                                     | 1.311795368 | 1           | 0.725613393 | 0.727149074 |             |
| 1.131132236 | 1.386257989                                                                                     | 0.680034823 | 1.313436    |             |             |             |
| YHR057C     | YHR057C::CPR2::Human cyclophilin B protein                                                      |             |             | 1           | 1.558144798 |             |
| 1.619070289 | 1.395770333                                                                                     | 1.820448566 | 1           | 1.320083321 | 1.363555242 |             |
| 1.751786101 | 1.918969186                                                                                     | 1           | 1.150987461 | 1.63271435  | 2.285377942 |             |
| 1.605322212 | 1                                                                                               | 1.502901802 | 1.187698955 | 1.520765008 | 2.063027304 | 1           |
| 1.202657372 | 1.313506984                                                                                     | 1.357155335 | 1.190732769 | 1           | 0.874232517 |             |
| 0.94191328  | 0.810455946                                                                                     | 0.952994773 | 1.011356357 | 1           | 0.816551535 |             |
| 0.89095137  | 0.724757745                                                                                     | 1.180422714 | 0.657869265 | 1           | 1.063598737 |             |
| 0.814386725 | 1.093239696                                                                                     | 0.909586763 | 0.931596754 | 0.781932238 |             |             |
| YHR071W     | YHR071W::PCL5::PHO85 cyclin                                                                     |             | 1           | 1.328248938 | 1.308122982 |             |
| 1.063489607 | 1.450454583                                                                                     | 1           | 0.954022986 | 1.150745595 | 1.060226155 |             |
| 1.336597372 | 1                                                                                               | 2.761711787 | 2.035506467 | 1.658737727 | 0.948518892 | 1           |
| 2.346404617 |                                                                                                 | 1.130967619 | 0.907634264 | 1           | 2.538594732 | 2.016115504 |
| 1.351928999 | 0.446183238                                                                                     | 1           | 0.899788733 | 0.960292014 | 0.944029579 |             |
| 0.846136302 | 1.009163225                                                                                     | 1           | 1.053393715 | 0.977964337 | 0.628928737 |             |
| 0.838298057 | 0.833275481                                                                                     | 1           | 1.138366964 | 1.251423198 | 1.121133442 |             |
| 1.143879172 | 1.074439002                                                                                     | 2.018313378 |             |             |             |             |
| YHR073W     | YHR073W::OSH3::Oxysterol Binding Protein                                                        |             | 1           | 0.812692479 |             |             |
| 0.852947216 | 1.29911667                                                                                      | 0.816628383 | 1           | 1.080232727 | 1.152754641 |             |
| 0.994858978 | 0.801560481                                                                                     | 1           | 1.120835408 | 1.078388378 | 0.629069923 |             |
| 1.107191049 | 1                                                                                               | 1.513211994 | 1.172059582 | 1.114469788 | 0.762784262 | 1           |
| 0.879241809 | 0.659597102                                                                                     |             | 0.66163274  | 1           | 0.941978816 | 1.069555759 |
| 0.862834517 | 0.863433434                                                                                     | 1.016520114 | 1           | 1.15481037  | 1.312535066 |             |
| 1.055783806 | 1.098981723                                                                                     | 1.216995806 | 1           | 1.003519522 | 1.239444183 |             |
| 1.161746474 | 1.098994736                                                                                     | 1.05068443  | 0.851982143 |             |             |             |
| YDL207w     | YDL207w::GLE1::Polyadenylated-RNA-export factor; the HIV Rev protein may mimic function of Gle1 |             | 1           | 0.700500898 | 0.809867079 | 0.864311122 |
| 0.977694245 | 1                                                                                               | 0.866620902 | 0.914409452 | 0.772239942 | 0.918481916 | 1           |
| 0.796805784 | 0.864203609                                                                                     | 0.787664564 | 0.926255519 | 1           | 1.14304509  |             |
| 0.730705842 | 0.93164271                                                                                      | 1.142249457 | 1           | 1.698968629 | 1.262465764 |             |
| 0.815293731 | 1.059902026                                                                                     | 1           | 0.802683951 | 0.92669378  |             |             |
| 0.803618707 | 1                                                                                               | 0.995053813 | 0.837969632 | 1.027341484 |             | 1           |
| 0.888985132 |                                                                                                 | 1.069064917 | 1.037025495 | 0.879126451 |             |             |
| YDL209c     | YDL209c::CWC2::Complexed with Cef1p                                                             |             | 1           | 0.764670986 | 0.9274526   |             |
| 1.01969668  | 1.056491534                                                                                     | 1           | 0.905869322 | 0.931833119 | 0.840168668 | 1           |
| 0.612222255 | 0.639373669                                                                                     | 0.607649812 | 1.015582845 | 1           | 0.488949277 |             |
| 0.620464554 | 0.938127936                                                                                     | 1           | 0.757456881 | 1.055176357 | 0.573923929 |             |
| 0.871923402 |                                                                                                 | 0.875952626 | 1.245878143 | 1.106144049 | 1           |             |
| 0.672179145 | 0.768442422                                                                                     |             | 1.083054336 | 1           | 0.568594689 | 0.504942949 |
| 0.885577408 | 0.634134694                                                                                     | 0.864027423 | 0.682111082 |             |             |             |
| YDL211c     | YDL211c::YDL211C::molecular_function_unknown                                                    |             | 1           | 0.928544388 |             |             |
| 1.022113215 | 0.920493101                                                                                     | 1.073993796 | 1           | 0.870159849 | 0.901376281 |             |
| 1.006067965 | 1.002880342                                                                                     | 1           | 0.713402223 | 0.525371414 | 0.689450493 |             |
| 1.150972739 | 1                                                                                               | 0.375909464 | 0.264710565 | 0.509101114 | 0.889008109 | 1           |
| 0.817038764 | 1.640412315                                                                                     | 0.853357203 | 0.718904482 | 1           | 0.589692804 |             |
| 0.738001065 | 0.761975992                                                                                     | 0.880851926 | 1           | 0.848688828 |             |             |
| 1           | 0.75596314                                                                                      | 0.771168646 | 0.660592684 | 0.540758561 | 1.135684372 |             |
| YAR035W     | "YAR035W::YAT1::Outer carnitine acetyltransferase, mitochondrial"                               |             | 1           |             |             |             |
| 0.961684362 | 0.926475122                                                                                     | 1.009595017 | 0.925689935 | 1           | 0.923492642 |             |
| 0.914774773 | 1.120988739                                                                                     | 1.159009446 | 1           | 0.933075262 | 1.176333699 |             |
| 1.464587482 | 1.118606292                                                                                     | 1           | 1.611225217 | 1.50741967  | 2.108206798 |             |
| 1.581224778 | 1                                                                                               | 1.627242606 | 1.686885566 | 1.778223523 | 1.264457909 | 1           |



1.226564365 1.111267264 1.480134523 1.321375427 1.377025882  
0.866522527 0.672782543 0.849812295 0.756670365 1 0.838519154  
0.901646655 0.815243038 0.877054335 1.263525396  
YDL213c YDL213c::FYV14::Function required for Yeast Viability on toxin  
exposure 1 0.616246555 0.799792073 0.686889181 1.030504886 1  
0.677303547 0.57189543 0.870637263 1.004194013 1 0.685158328  
0.470462054 0.446188009 0.985479911 1 0.629751564 0.284950787  
0.327627869 0.535219416 1 1.231885489 0.683310961 0.417185038  
0.610837789 1 0.947007839 1.04403185 0.711949402 0.772484009  
1.309032907 1 1.435237533 1.110781102 1.243116749 1.822727377  
2.638265336 1 0.820476604 0.777565209 0.620961962 1.085334319  
0.454097785 1.15144561  
YCR027C YCR027C::RHB1::rheb homologue 1 1.030419878 1.030957061  
0.963984865 1.105748704 1 0.976254697 0.921508869 0.945597329 1  
0.835080709 0.896299522 0.870912056 0.910998946 1 1.047474455  
1.004964321 1.060556153 0.71230553 0.67604047 0.745773913 1  
1.110405395 1.199580428 1.252180841 1.135523035 1.161457727 1  
0.806523764 0.959490389 0.6664105 1.017587438 1 1.169086543  
1.195702963 1.08098857 1.053298627 1.508708888 0.970191427  
YDL215C YDL215C::GDH2::NAD-dependent glutamate dehydrogenase 1  
0.918287515 0.934145506 1.252505059 0.789593426 1 1.165179439  
1.144251257 0.918043983 0.860917213 1 0.933418945 1.052132079  
0.936787962 1.093748321 1 1.0619124 0.990833647 1.340216214  
0.675664005 1 1.045544154 1.387515242 1.249921669 1.245767204 1  
0.761404795 0.686074469 0.836321381 0.991835506 0.934725611 1  
0.770598401 0.719557446 1.032729095 1.000577523 1.145560974 1  
0.863309428 0.785865727 0.898680383 1.080199883 1.207919688 1.074390646  
YDL217c YDL217c::TIM22::Mitochondrial inner membrane protein involved in  
import of proteins of the ADP/ATP carrier (AAC) family 1 0.920179115  
1.122431176 1.044806889 0.944639984 1 0.985878527 1.028502171  
1.090653792 1.226077096 1 0.89744502 0.794630681 1.009076581  
1.045872793 1 0.795550426 0.715635083 0.55541518 1.443093017  
0.644948541 0.531866951 0.69033008 1 1.164221189 1.158739273  
1.242429848 1.247719299 1.277590148 1 1.054963515 1.217635071  
1.036438567 1.020486886 1.219621309 1 1.003904267 1.213251642  
0.851378417 1.043000017 0.80896046 1.023604482  
YCR054C YCR054C::CTR86::CTR86 shares a terminator region with THR4. CTR86  
contains aGCN4 responsive site suggesting it may also be involved in amino acid  
biosynthesis. 1 1.30200586 1.208798862 1.427819895 1.335271833 1  
1.163583539 1.309958808 1.409947696 1.326774008 1 0.973102548  
1.136871965 1.357575884 1 1.185815219 1.237646617  
1.027785131 1 0.797708168 1.064980784 0.651188715 0.727838379 1  
0.739929108 0.660671937 0.641147898 0.778038516 0.747089104 1  
0.826722179 0.774313723 0.52834284 0.836923239 0.916232509 1  
0.946191596 0.981743096 0.819435684 1.180050182 0.880227653 0.895763354  
YDL231c YDL231c::BRE4::contains several putative trans-membrane domains 1  
0.963947521 0.922895086 1.367702364 0.936417741 1 1.208655407  
1.176758878 0.974431167 0.907690694 1 1.303102767 1.079995386  
0.67199498 1.122237769 1 1.015223849 1.129729428 1.076465034  
0.48394045 1 0.427108908 0.248585527 0.216344603 0.56100197 1  
1.088748762 1.084332018 1.373506924 1.200853781 1.199254043 1  
1.104975271 1.156523899 1.617048493 2.590592165 1.788026771 1  
0.935087142 1.339549268 1.567727912 1.021480995 0.788013303 1.083146878  
YIR032C YIR032C::DAL3::ureidoglycolate hydrolase 0.810186837  
0.815393711 0.704431975 0.953515784 0.710697351 0.715046707  
1.091581884 0.827063539 0.935021832 1.216477216 1.123879374 1  
1.749188194 1.924374478 3.34226146 1 1.605780816 1.948824396

|             |                                                                                                                                                                           |             |             |             |             |             |
|-------------|---------------------------------------------------------------------------------------------------------------------------------------------------------------------------|-------------|-------------|-------------|-------------|-------------|
| 2.508495144 | 2.305966904                                                                                                                                                               | 1           | 1.062009251 | 1.121236362 | 1.137525816 |             |
| 1.346576312 | 1.30123184                                                                                                                                                                | 1           | 0.836197346 | 0.657907984 | 0.724439501 |             |
| 0.869597478 | 0.601607257                                                                                                                                                               | 1           | 0.743799633 | 0.563142021 | 0.843043439 |             |
| 0.498064412 | 0.893798907                                                                                                                                                               | 0.67072796  |             |             |             |             |
| YDL233w     | YDL233w::YDL233W::molecular_function                                                                                                                                      | unknown     | 1           | 1.04177606  |             |             |
| 1.078295516 | 0.96838056                                                                                                                                                                | 0.950937368 | 1           | 1.061751534 | 1.125761791 |             |
| 0.899725668 | 0.853731631                                                                                                                                                               | 1           | 1.142653233 | 1.142656362 | 1.179660952 |             |
| 0.901187101 | 1                                                                                                                                                                         | 1.182634757 | 1.016914566 | 1.15321991  | 1.098165298 | 1           |
| 1.391301065 | 1.450121047                                                                                                                                                               | 1.005161444 |             | 0.86964091  | 0.785102039 |             |
| 0.969912938 | 0.93562055                                                                                                                                                                | 0.963570075 | 1           | 0.900280851 | 0.831089419 |             |
| 0.852402562 | 0.78685861                                                                                                                                                                | 1.263628383 | 1           | 0.578257724 | 0.655098231 |             |
| 0.74411443  | 0.99617761                                                                                                                                                                | 1.094297668 | 1.158450512 |             |             |             |
| YNR016C     | YNR016C::ACC1::acetyl-CoA carboxylase                                                                                                                                     |             | 1           | 1.144146629 |             |             |
| 0.890619034 | 1.368133697                                                                                                                                                               | 0.748781697 | 1           | 1.486617012 | 1.320352088 |             |
| 0.733031806 | 0.802608954                                                                                                                                                               | 1           | 1.093109032 | 1.074897099 | 0.583730628 |             |
| 0.953874811 | 1                                                                                                                                                                         | 0.609897254 | 0.683919517 | 0.659295396 | 0.563544127 | 1           |
| 0.410119737 | 0.511939213                                                                                                                                                               | 0.262760352 | 0.392261398 | 1           | 0.830308782 |             |
| 0.74830394  | 0.955657357                                                                                                                                                               | 1.238705443 | 0.738835496 | 1           | 0.722228371 |             |
| 0.500922465 | 0.694524637                                                                                                                                                               | 0.634107679 | 0.394597792 | 1           | 0.616922949 |             |
| 0.491687547 | 0.939009857                                                                                                                                                               | 0.624639024 | 0.467379246 | 0.942171402 |             |             |
| YDL235c     | YDL235c::YPD1::Ypd1p is an intermediate protein between Sln1p and Ssk1p in the phosphorelay reaction.                                                                     |             | 1           | 1.073162247 | 1.280070844 | 1.049826738 |
| 1.414625513 | 1                                                                                                                                                                         | 0.924247695 | 0.957325218 | 1.53233059  | 1.364407093 | 1           |
| 0.855135291 | 1.121517759                                                                                                                                                               | 1.396393149 | 1.209870804 | 1           | 1.238491122 |             |
| 1.038096607 | 1.001768025                                                                                                                                                               | 1.635344268 | 1           | 1.44625535  | 1.725298444 |             |
| 1.677978375 | 1.075481443                                                                                                                                                               | 1           | 1.068701265 | 1.1010961   | 0.62154832  |             |
| 0.775783523 | 1.011532701                                                                                                                                                               | 1           | 1.205524632 | 1.487525805 | 0.905847824 |             |
| 0.852561251 | 1.751893489                                                                                                                                                               | 1           | 1.029067709 | 1.031006169 | 0.764140689 |             |
| 1.338076658 | 0.939876306                                                                                                                                                               | 2.021815829 |             |             |             |             |
| YOL016C     | YOL016C::CMK2::Calmodulin-dependent protein kinase                                                                                                                        |             |             |             |             |             |
| 0.922233979 | 1.003298638                                                                                                                                                               | 1.019749153 | 1.009317057 |             | 0.831770108 |             |
| 0.851246024 | 0.927485984                                                                                                                                                               | 0.890859672 |             | 1.048899846 | 1.219547698 |             |
| 1.34151377  | 1.064161055                                                                                                                                                               | 1           | 1.612295238 | 1.683514323 | 1.404304827 |             |
| 2.034825483 | 1                                                                                                                                                                         | 3.178414173 | 4.050948757 | 3.319384034 | 3.254997135 | 1           |
| 1.175130694 | 1.36728974                                                                                                                                                                | 1.371769018 | 0.855370103 | 1.151048706 | 1           |             |
| 1.833229969 | 2.394845461                                                                                                                                                               | 1.364813502 | 1.667425983 | 1           | 1.40097208  |             |
| 1.368616527 | 1.460786035                                                                                                                                                               | 0.87503727  | 0.912225647 | 1.017475036 |             |             |
| YDL237w     | YDL237w::YDL237W::molecular_function                                                                                                                                      | unknown     | 1           | 0.960085048 |             |             |
| 0.918971801 | 0.995667041                                                                                                                                                               | 0.97186065  | 1           | 0.941782288 | 1.052273333 |             |
| 1.00206009  | 1.01378602                                                                                                                                                                | 1           | 0.947999675 | 1.026217564 | 1.02302043  |             |
| 0.968206145 | 1                                                                                                                                                                         | 1.775259643 | 1.214598071 | 1.681090388 | 1.309501042 | 1           |
| 1.205662013 | 0.985016728                                                                                                                                                               | 1.497451477 | 0.961091763 | 1           | 1.038580499 |             |
| 0.988772537 | 1.22322452                                                                                                                                                                | 1.35109745  | 1.221882204 | 1           | 1.516889376 |             |
| 1.035795821 | 0.864521948                                                                                                                                                               | 0.963889031 | 0.53909851  | 1           | 0.929190272 |             |
| 0.746769086 | 0.846268118                                                                                                                                                               | 0.750189219 | 0.809652102 | 1.361595274 |             |             |
| YOL110W     | YOL110W::SHR5::Involved in RAS localization and palmitoylation                                                                                                            |             |             |             | 1           |             |
| 1.196426749 |                                                                                                                                                                           | 0.328599857 | 1           | 1.127679914 | 0.601325395 |             |
| 0.559265759 | 1                                                                                                                                                                         | 1.091353407 | 1.188360017 | 1.59389373  | 0.596955174 | 1           |
|             | 0.820886158                                                                                                                                                               | 1.019259543 |             |             | 1           |             |
| 1.102567184 | 0.796672286                                                                                                                                                               | 1.237996453 | 1.290631948 | 0.996318676 | 1           |             |
| 0.725742296 | 0.797060044                                                                                                                                                               | 0.720110932 | 0.855745382 | 0.85595111  | 1           |             |
| 1.123837373 | 0.846105937                                                                                                                                                               | 0.903049308 | 0.685673687 | 1.004511712 | 1.09190311  |             |
| YPL242C     | "YPL242C::IQG1::Homolog of the mammalian IQGAP1 and 2 genes; probable regulator of cellular morphogenesis, inducing actin-ring formation in association with cytokinesis" |             | 1           | 1.070060838 | 0.956451208 | 1.199161901 |
| 0.950817586 | 1                                                                                                                                                                         | 1.303031216 | 1.036723865 | 0.957411527 | 1           |             |
| 0.909314611 | 0.902748507                                                                                                                                                               | 0.575441874 | 1.004190584 | 1           | 1.024235327 |             |

1.031205597 0.651965171 1 0.396259266 1  
0.910138867 0.6583355 0.755051092 1.006761832 0.82287993 1  
1.085789266 0.688140364 0.581300508 1.019611536 1.13828417 1  
0.897698284 0.773861724 0.966234171 1.095890125 1.044238498 0.860738375  
YBR218C YBR218C::PYC2::converts pyruvate to oxaloacetate 1  
1.547574032 1.132142852 2.054857331 1.01633105 1 1.666169686  
1.762709407 1.09705084 1.080432601 1 1.705387105 1.413539583  
0.862989372 1.557201129 1 0.961174144 0.912565713 0.602287949 1  
0.759929981 0.762330242 0.456262383 0.521736324 1 1.083852525  
0.892805007 1.104293846 1.357326561 1.171740852 1 0.84123421  
0.514721693 0.67327705 0.837847634 0.635832278 1 0.726571807  
0.675777095 1.089061391 0.727164887 1.157214241 0.744280421  
YAL053W YAL053W::YAL053W::molecular\_function unknown 0.959172554  
0.860946388 0.920234173 0.999527376 0.944367805 0.958887514  
0.96458542 0.924313386 0.765576309 0.81973065 0.715162379  
0.885618562  
0.669131525 0.923437938 0.708744711 0.862141694 1 1.07376537  
0.851874626 1.380230871 0.752715386 0.862686932 1 1.078574975  
0.99643975 0.949149755 0.988418164 0.874223323 0.808200933  
YDL239c YDL239c::ADY3::Accumulation of dyads 1 1.000876629  
1.226502678 1.577222117 0.990817687 1 1.222624991 1.468062563  
1.26106846 0.942279888 1 1.482386973 1.564233903 1.290470389  
1.33077671 0.638138718 0.613516021  
0.745852068 0.514214371 1 1.016187995 1.309843353  
1.046695908 0.934510831 1 0.941192212 1.390222696  
0.702218535 0.609168001 0.91548272 0.584224722 1.172460524  
YDL241w YDL241w::YDL241W::molecular\_function unknown 1 1.144471809  
1.17553138 1 0.972911867 0.871317511 1.311943777 1.029690808 1  
1.021259902 1.08605476 0.885525404 0.809104842 1  
0.834048488 1 1.65233347  
0.880589492 1.242933439 1.490774065 1 0.953590056 1.214044978  
0.697168369 2.421223463 0.854479523 0.694432215  
1.174615417 1.228191911 1.043743836  
YDR007W "YDR007W::TRP1::Note that the sequence of TRP1 from strain S228C,  
which is the sequence stored in SGD, contains an ochre mutation at codon 67." 1  
1.099413819 1.147085213 0.967651842 1.334862426 1 0.974548694  
0.96866509 1.387050144 1.400617066 1 0.929348602 0.917682298  
1.277278256 1.219701643 1 1.521033246 0.861022269 1.106643585  
1.455224576 1 1.49481536 1.403642023 1.762629635 1.217994162 1  
1.072356033 1.085787416 0.905426878 1.111124693 1.145442653 1  
1.065070233 1.056724177 0.64680518 0.659835734 1.11017892 1  
1.000164677 0.935782107 0.805006278 1.405789464 1.118395162 1.252142274  
YAL055W YAL055W::PEX22::Product of gene unknown 1 1.360549838  
1.790615682 1.412835444 2.277869822 1 1.370166781 1.417196507  
1.679320569 1 1.483130679 1.516560824 2.566884345 1.586697801 1  
1.336991443 1.213863841 1.443204653 1.68780131 1 1.048596564  
1.589811849 1.562011848 0.816009094 1 1.147850058 1.010785618  
1.006141791 1 0.897861227 1.134366635 1.211124445 1  
1.092380927 1.092588129 1.226777571 0.993310803 1.378232177  
YDR009W YDR009W::GAL3::Involved in galactose induction of GAL genes 1  
1.393748931 1 1.717344816 1  
1.446865213 1.462842988 1.398482481 1 1.079360869  
1.397821035 1 0.694652629 0.697703087 0.514957482 0.377660485 1  
1.014692802 1.174844301 1.293123542 0.994655288 1 0.87037387  
1.032002776 1.078672108 1.208456682 0.612452735 0.834574424  
1.108380495 0.642801323 0.787031036 0.818708442

YDR011W YDR011W::SNQ2::ABC transporter 1 1.006345959 0.926300419  
1.216670722 0.709833351 1 1.181986941 1.162834369 0.692914317  
0.63823808 1 3.370157686 1.475747668 0.677616155 0.901958215 1  
1.826697228 1.614232099 1.371272595 0.59433493 1 0.825081434  
0.690611181 0.427342994 0.472555092 1 0.986836827 0.821620315  
1.012399837 0.83847871 1 1.68278129 0.642297306 1.105593339  
1.107946348 0.523155463 1 0.905226019 0.596372923 0.665691888  
0.479259791  
YAL058W YAL058W::CNE1::Functions in endoplasmic reticulum protein quality  
control 1 1.235056825 0.848208598 1.116612273 0.79967865 1  
1.019856935 0.94226583 0.917843043 0.987389216 1 0.967458622  
0.858708668 1.218531214 1  
1 1.176736396 1.489028443 1.370200798 1.142690575  
1.148332352 1.369860484 0.770706381 1 0.89099064  
1.170518462 0.752555184 0.831791816 0.886131457  
YDR013w YDR013w::YDR013W::molecular\_function unknown 1 0.984992004  
1.24155624 0.848611796 1.752036689 1 0.78477021 0.937250254  
1.531482552 1.283454904 1 0.78517653 0.785392702 1.105001804  
1.137592061 1 0.653531589 0.513259244 0.644845993 1.026319014 1  
1.641524633 1.558942657 1.484786767 1 0.990885745 1.084324169  
0.677599959 0.698647061 1.106396439 1 0.662832302 1.157715803  
0.891401482 1.533941053 1 1.024632542 1.262939667 0.899736097  
1.605977788 1.433380903  
YDR015c YDR015c::YDR015C::molecular\_function unknown 0.882832788  
1.136825333 1.200431904  
1.556529932 1.050455152 1 0.824301904 0.9697299 1  
0.984623592 0.991715089 1 0.665370691 0.896221002  
1.087107326 0.766965871 1 1.351069931 1  
0.43024762 1.158171928 1.24344305 0.908828982  
YOL109W YOL109W::YOL109W::molecular\_function unknown 1 0.997325486  
1.507690696 0.818237535 1.664650945 1 0.960383134 0.715420808  
1.526186467 1.222308224 1 0.837808455 0.869734909 0.877328254  
0.978904761 1 1.219703239 0.707263106 0.517101567 0.896913826 1  
1.878370772 1.664067889 1.169001001 1.340515589 1 0.814366598  
0.792823693 0.480989827 0.849918121 1.088412004 1 1.162511193  
0.976771135 0.491204204 0.782579526 1.867030993 1 0.959538682  
0.70875078 0.523546471 1.637997708 0.655637047 1.650551232  
YDR017C YDR017C::KCS1::Converts inositol hexakisphosphate to  
diphosphoinositol polyphosphates. Contains two leucine heptad repeats. Essential  
for biogenesis of the yeast vacuole and the cell's responses to certain  
environmental stresses. 1 1.103755999 0.957804145 1.374996204 1.074974495 1  
1.285188448 1.217573793 1.052081574 0.875091812 1 0.847727597  
0.910590682 0.68248258 1.145571872 1 0.90504183 0.903559419  
0.904371625 1 0.767383198 1.001129992 0.926952255 1  
0.893521896 0.789234148 0.912486082 0.859397145 0.931097816 1  
1.17030354 0.808723251 0.819796268 1.108393962 1 0.999961756  
0.815660258 0.771887805 0.742952561 1.344082811  
YAL002W YAL002W::VPS8::involved in vacuolar protein sorting; required for  
localization and trafficking of the CPY sorting receptor 1 1.128397993  
1.005682485 1.282091822 0.871892011 1 1.260623382 1.31968412  
1.088845091 0.798308296 1 1.25531737 1.274239096 0.729028731  
1.120425182 1 0.780647932 2.306977114 1.687849883 0.478440895 1  
0.558401793 0.326714851 0.304262057 1 1.100952558  
0.902634145 1.353816552 1.180499884 1 0.920805464 0.604000092  
0.845505583 0.954537608 0.587726979 1 0.901885352 0.614315596  
0.987068238 0.579488954 1.086533647 0.653215497

YDR031w YDR031w::YDR031W::molecular\_function unknown 1 1.581321731  
1.961977788 1.576115797 2.512631046 1 1.396107837 1.526753191  
2.443527923 2.452385191 1 1.33122349 1.714576708 3.303524521  
1.943447824 1 1.540730113 0.682724744 1.110645839 1.891863121 1  
2.906967219 2.901016181 1.510257711 1 1.049891662 1.546016612  
0.899839365 0.775469954 1.054075149 1 0.896208745 2.023004479  
1.502648045 1.528240299 2.442511069 1 1.102871367 2.025739323  
1.018284751 1.771394626 2.134261456 1.580501274  
YAL004W YAL004W::YAL004W::molecular\_function unknown 1 1.654497292  
1.205805582 2.006697742 0.844157583 1 1.84452588 2.262394129  
0.999200615 1.066515159 1 1.77982254 1.893413636 1.385067722  
0.90085086 4.453475918 5.131414465 6.533977089 1  
0.817113036 0.336527375 1.320846644 1 0.944165908 0.707252739  
1.269381312 0.924856809 0.771196451 1 1.27993162 0.573321443  
0.562439606 0.244133034 0.092117398 1 1.034496131 0.501219201  
0.503258571 0.235664753 0.586254211 0.859862762  
YDR033w "YDR033w::MRH1::Membrane protein related to Hsp30p; Localized by  
immunofluorescence to membranes, mainly the plasma membr. punctuate  
immunofluorescence pattern observed in buds. The nuclear envelope, but not  
vacuole or mitochondrial membranes also stained" 1 1.529859722  
0.73479047 1.017832918 0.908213679 1 1.203452349 1.10040086  
0.696633076 0.989585594 1 1.136365174 0.800509816 0.471749777  
0.717025418 1 1.691491368 1.125465872 1.145452099 0.552543301 1  
0.727337995 0.481963065 0.599547082 0.691776894 1 1.253805199  
1.187331575 1.677514832 2.050370306 1.444328565 1 1.201920697  
0.885726759 1.197918696 1.073268912 0.669867816 1 1.332447198  
0.791396464 1.045884281 0.722854569 1.17683864  
YAL007C YAL007C::ERP2::Emp24p/Erv25p related protein 2 1 1.30473275  
1.180167686 0.938218125 1.358398592 1 1.093613759 1.065199221  
1.039094425 1.013619244 1 0.963788554 1.008481535 1.266908921  
0.972263098 0.970736772 0.601597131 0.613266412 0.576250281 1  
1.004331659 1.10158138 0.857182691 1.041617609 1 1.122279344  
1.215626594 1.016801253 1.022044146 0.941744489 1 1.034219315  
1.527429122 1.26609475 1.011785595 1.168722554 1 0.885909201  
1.291544854 1.076016903 1.244543354 1.371166424 1.684700598  
YAL009W "YAL009W::SPO7::dispensable for mitosis, but required for a normal  
mutation rate, required for premeiotic DNA synthesis, recombination, meiosis I,  
meiosis II, glycogen degradation and spores" 1 1.415847497 1.278077121  
1.242529127 1.594641665 1 1.131481417 1.219050358 1.349826189  
1.50171364 1 1.22990452 1.261523711 1.561495657 1.228439761 1  
1.122468424 0.8990707 0.908981798 0.80608526 1 1.086576723  
1.922027298 1.991326811 1 1.216029516 1.270542649 1.250851127  
1.267293714 0.997889677 1 0.883089639 1.197099999 1.29070754  
0.974711191 1.855383571 1 1.0707038 1.096945075 1.048769299  
1.123846064 1.351784964 1.182967981  
YAL011W YAL011W::SWC1::Hypothetical ORF 1 1.231546177 1.159593589  
1.193657021 1.090979873 1 1.171684114 1.16991737 1.156415812  
1.169279033 1 1.187043796 1.210527093 1.055021346 1.232232292 1  
1.119532319 1.079730862 1 1.281608693 1.333192156  
1 0.925344215 1.018744008 0.991590008 0.872962712 1.048286111  
0.907270246 1.098290011 1.166267624 1 0.813059999 0.966249395  
1.026245934 0.576671466 1.142509556 1.030609488  
YAL013W YAL013W::DEP1::Regulator of phospholipid metabolism 1  
0.643974064 0.854573659 0.674176907 0.423638969 1 0.824272527  
0.870399321 0.758713193 0.724862117 1 1.093296495 1.108577376  
1.171611315 0.686740875 1 0.920470415 0.882919749 0.859114895  
0.796568105 1 2.811643848 2.187544571 1.691263758 0.913707802

|         |                                                                                                             |               |               |               |                         |
|---------|-------------------------------------------------------------------------------------------------------------|---------------|---------------|---------------|-------------------------|
|         | 0.833120552                                                                                                 | 1.09014175    | 0.819274003   | 1.052559223   |                         |
|         | 0.724130505                                                                                                 | 2.005372243   | 1             | 0.801343425   | 1.163727707             |
|         | 0.687364863                                                                                                 |               |               |               |                         |
| YLL013C | "YLL013C::PUF3::member of the PUF protein family, which is named for the founding members, PUmilio and Fbf" |               |               |               | 0.998573744 1.121735746 |
|         | 1.518442313                                                                                                 | 0.843871267   | 1.197410019   | 1.437782055   | 1.128882957             |
|         | 1.064323368                                                                                                 | 1.593845536   | 1.30628051    | 1.131171882   | 1.134648289 1           |
|         | 0.872553728                                                                                                 | 0.762053751   | 0.705897833   | 0.52078493    | 1 0.651040337           |
|         | 0.672289882                                                                                                 | 0.762945546   | 0.618294595   | 1 0.752061969 | 0.650644205             |
|         | 1.003372338                                                                                                 | 0.678610399   | 1 0.989270731 | 0.480512437   | 1.074219051             |
|         | 1.14267429                                                                                                  | 0.332796354   | 1 0.698763172 | 0.730681377   | 1.027211179             |
|         | 0.251086767                                                                                                 | 1.067763214   | 0.538508768   |               |                         |
| YLL027W | YLL027W::ISA1::Iron Sulfur Assembly -- IscA/NifA homolog                                                    |               |               |               | 1                       |
|         | 1.148564127                                                                                                 | 1.202311065   | 1.044230193   | 1.176072127   | 1 1.015794888           |
|         | 0.997344838                                                                                                 | 1.413140898   | 1.166472535   | 1 0.881503995 | 0.749401743             |
|         | 1.487014062                                                                                                 | 1.367185386   | 1 0.644991227 | 0.849909335   | 1.228746966 1           |
|         | 1.103138601                                                                                                 | 1.164645799   | 2.01647532    | 1.254377784   | 0.740678376             |
|         | 0.664529525                                                                                                 | 0.531431499   | 1.632730635   | 1.351103207   | 1 0.276321109           |
|         | 0.376067323                                                                                                 | 0.295144267   | 0.57609364    | 2.727118178   | 1 0.427043072           |
|         | 0.454071285                                                                                                 | 0.837179604   | 1.061649154   | 1.291495573   | 0.992957567             |
| YLL029W | YLL029W::YLL029W::molecular_function unknown                                                                |               |               |               | 1 0.969047051           |
|         | 0.935987186                                                                                                 | 0.903188582   | 0.774158701   | 1 1.013348113 | 1.094277619             |
|         | 0.869195873                                                                                                 | 0.920249809   | 1 1.598850852 | 1.454534007   | 1.225878787             |
|         | 1.035308468                                                                                                 | 1 1.472436725 | 1.00958257    | 1.089932048   | 0.882076195 1           |
|         | 1.230617371                                                                                                 | 0.700148768   | 0.88343471    | 0.897961743   | 1 1.061580019           |
|         | 0.846032202                                                                                                 | 0.86672477    | 1.113894439   | 1 1.266002937 | 0.674305941             |
|         | 0.99187281                                                                                                  | 0.926467213   | 0.702958716   | 1 1.133909591 | 0.774511244             |
|         | 0.882710785                                                                                                 | 0.498209981   | 0.951129784   | 1.178589866   |                         |
| YLL031C | YLL031C::GPI13::Glycosylphosphatidylinositol (GPI) biosynthesis                                             |               |               |               |                         |
|         | 1.302701607                                                                                                 | 0.81425484    | 0.788070052   | 1.073915765   | 1.036872614             |
|         | 0.751263623                                                                                                 | 0.667834983   | 1.627603229   | 1.10002564    | 0.538708921             |
|         | 1.148354076                                                                                                 | 1 0.85134487  | 0.809244027   | 0.725891252   | 0.364583671 1           |
|         | 0.612564523                                                                                                 | 0.381005002   | 0.385182771   | 0.371753244   | 1 1.223247008           |
|         | 1.01674618                                                                                                  | 1.21654118    | 1.137377834   | 0.669484549   | 1 0.8422527             |
|         | 0.730934889                                                                                                 | 0.943193915   | 0.804590742   | 0.430778049   | 1 1.282881763           |
|         | 1.135274211                                                                                                 | 1.228355222   | 0.592724874   | 0.937486657   | 0.661096116             |
| YLL033W | YLL033W::YLL033W::molecular_function unknown                                                                |               |               |               | 1.028124619             |
|         | 1.060239551                                                                                                 | 1.206089801   | 0.87051341    | 0.910558674   |                         |
|         | 1.217962534                                                                                                 | 0.794511463   | 0.76684485    | 1.11598051    | 1.080803829 1           |
|         | 0.584605823                                                                                                 | 0.347915412   | 0.562659732   | 1.022168524   | 1 0.983155081           |
|         | 2.499109519                                                                                                 | 1.524365959   | 0.955355864   | 1 0.889322775 | 0.78807285              |
|         | 0.656341437                                                                                                 | 0.687737922   | 0.904236905   | 1 1.005571899 | 1.297318856             |
|         | 1.18133881                                                                                                  | 1.107147279   | 1.609491213   | 1 1.047463671 | 1.402667267             |
|         | 1.413201239                                                                                                 | 1.130430592   |               |               |                         |
| YLL035W | YLL035W::GRC3::Product of gene unknown                                                                      |               |               |               | 1 0.73573768            |
|         | 0.507930494                                                                                                 | 0.57716167    | 1 0.59724522  | 0.621284972   |                         |
|         | 0.633789388                                                                                                 | 1 0.545971673 | 0.416328104   | 0.31152098    | 0.728298127 1           |
|         | 1.809310655                                                                                                 | 0.915925355   | 0.545304303   | 1 0.406972305 | 0.587928158             |
|         | 0.293085358                                                                                                 | 0.266030042   | 1 0.780965532 | 0.561722106   | 0.692137383             |
|         | 1.016280536                                                                                                 | 0.836551947   | 1 0.770907178 | 0.615137156   | 0.618888527             |
|         | 0.982833821                                                                                                 | 0.787493454   | 1 0.554010637 | 0.60889828    | 0.751486297             |
|         | 0.399203469                                                                                                 | 0.484243983   | 0.810827823   |               |                         |
| YLL037W | YLL037W::YLL037W::molecular_function unknown                                                                |               |               |               | 1 1.123494351           |
|         | 1.28938759                                                                                                  | 0.932602268   | 1.47200081    | 1 0.893123965 | 0.88082832              |
|         | 1.600628107                                                                                                 | 1.441060615   | 1 0.855277598 | 0.966478871   | 1.513794938             |
|         | 1.175108476                                                                                                 | 1 1.104504208 | 1.649695659   | 1.020722489   | 1.31859101 1            |
|         | 1.21440094                                                                                                  | 2.632795976   | 1.495877544   | 0.880966365   | 1 0.898317463           |

1.000723465 1.035237247 0.793997892 0.934817949 1 1.030820121  
1.475258088 1.086736559 1.122127812 1.603665226 1 1.561846893  
2.934302024 2.017400884 2.932578369 1.880686125 1.172460524  
YLR170C YLR170C::APS1::Involved in a subset of clathrin functions at the  
Golgi 1 0.821251883 1.271405452 0.970326752 1.351555164 1 0.86542737  
1.014882503 1.598024112 1.442521284 1 1.119743768 1.247870435  
1.286458383 1.324668138 1 1.167584579 0.954657513 1.044867214  
1.443960548 1 2.474120243 2.190136659 2.854335305 1.978756724 1  
0.927534891 1.384699279 0.751811265 0.744566932 0.955457503 1  
1.034698351 1.257773848 1.099117329 1.379810258 1.611007237 1  
1.187219654 1.321948364 1.34019397 1.147736413 2.077925466 1.34058036  
YLR272C YLR272C::YCS4::loss of cohesion 1 0.876414531 0.714532408  
0.759735884 1 0.946402735 0.893880415 0.801295804 1  
0.818442277 0.763066498 0.527601605 1.115245815 1 0.863807414  
0.34796048 0.632790691 0.718716214 1 0.813413896 0.706520203  
0.636628867 1 0.89636848 0.7973434 1.006187616 0.94290853  
0.985588011 1 0.891651645 0.707085242 0.739584594 0.931451681  
0.536124842 1 0.712755955 0.891991536 0.985833657 0.596719779  
0.891730649 0.847604027  
YLR172C YLR172C::DPH5::diphthamide biosynthesis 1 1.171108493  
0.964001642 0.748955236 1 0.957378799 0.828976807 0.763633361  
0.919184802 1 0.985403214 0.708478755 0.551216549 0.943735752 1  
0.910841 0.4714837 0.48327864 0.595416344 1 1.049518574  
0.89501567 0.762474195 0.935629482 1 1.014399207 0.858581944  
0.853570605 1.071103189 0.849727253 1 1.008149141 1.025163016  
0.668884516 0.728333791 1.133071806 1 1.056378493 0.966193649  
0.842933899 1.149531682 0.692908256 0.943047067  
YLR274W YLR274W::CDC46::Member of complex that acts at ARS's to initiate  
replication 1 0.683851238 0.689779855 0.931519857 0.544389537 1  
0.863483865 0.876454285 0.682020168 0.575450057 1 0.748525971  
0.844734516 0.498438078 0.682693258 1 0.606226701 0.750718476  
0.983854287 1 1.284548229 0.751236434 1.157592497 1.227583341 1  
0.993374019 1.059890452 1.031027523 0.835187851 1.005198175 1  
0.973763288 0.933808765 0.878714408 0.813919729 0.967692089 1  
1.259830629 1.101217625 1.149417811 0.711963636 1.00865706 0.709255442  
YLR174W "YLR174W::IDP2::concerts isocitrate and NADP+ to 2-oxoglutarate, CO2,  
and NADPH" 1 1.251837763 1.404931742 1.567116979 1.202386015 1  
1.263980844 1.429994144 1.432079015 1.528555885 1 1.385349463  
1.482423824 2.07952106 1.440220643 1 1.934142859  
1.360708079 1 0.772746515 1.022078465 1.268646485 1.074702881 1  
0.844000018 0.940055972 1.037959474 0.889489606 0.902716951 1  
1.100152212 1.205570904 1.281247326 1.090706951 2.150092537 1  
0.789306991 0.699426527 1.087679959 0.269517657 1.443996278 0.925534604  
YLR276C YLR276C::DBP9::Dead-Box Protein 9 1 0.549829813 0.430910599  
0.629966576 0.586508317 1 0.494612616 0.466033584 0.515482564  
0.569372879 1 0.384632451 0.231011224 0.711814061 1  
0.3632759 0.227548153 0.342395234 0.698282901 1 0.635369836  
0.688353392 0.508413401 0.815825097 1 0.723115168 0.558580227  
0.567683165 0.711820767 0.870061714 1 0.804950185 0.612090054  
0.490841419 0.900009997 1.210250124 1 0.874205045 0.855096332  
1.092537183 1.096323778 0.666982943 0.668976735  
YLR188W YLR188W::MDL1::ATP-binding cassette (ABC) transporter family member  
1 0.939598455 0.749755791 1.09585389 0.623358693 1 1.062798246  
1.123049379 0.851391176 0.820878844 1 1.026254491 0.877486339  
0.49443745 1.029458063 1 0.942905039 0.823943882 0.760280436  
0.593125476 1 0.844795747 0.635013883 0.568983444 0.788086401 1  
0.967392344 1.014057384 1.089881937 1.363854276 1.145074765 1

|         |                                                                                                                                                     |             |             |             |             |             |             |
|---------|-----------------------------------------------------------------------------------------------------------------------------------------------------|-------------|-------------|-------------|-------------|-------------|-------------|
|         | 0.814649521                                                                                                                                         | 0.529879989 | 0.667245114 | 0.977100555 | 0.406645807 | 1           |             |
|         | 0.759592108                                                                                                                                         | 0.570680151 | 0.862191239 | 0.615594843 | 0.773800633 | 0.611185564 |             |
| YLR190W | YLR190W::YLR190W::molecular_function                                                                                                                | unknown     |             |             |             | 1           | 1.194024259 |
|         | 0.967288477                                                                                                                                         | 1.247081497 | 0.873035734 | 1           | 1.407239612 | 1.325761041 |             |
|         | 0.84291891                                                                                                                                          | 0.846467282 | 1           | 1.138742328 | 1.04146852  | 0.687154043 |             |
|         | 0.793379038                                                                                                                                         | 2.041060261 | 1.462779153 | 1.875304191 |             | 1           |             |
|         | 0.42238472                                                                                                                                          | 1           | 0.964367755 | 0.773634244 | 0.874462096 | 1.437842007 |             |
|         | 0.881132528                                                                                                                                         | 1           | 0.688827977 | 0.480474637 | 0.425680076 | 0.69789207  |             |
|         | 0.881175581                                                                                                                                         | 1           | 0.696937703 | 0.484610494 | 0.939812621 | 0.696537966 |             |
|         | 0.820769169                                                                                                                                         | 0.800320314 |             |             |             |             |             |
| YAL027W | YAL027W::YAL027W::molecular_function                                                                                                                | unknown     |             |             |             | 1           | 0.988920593 |
|         | 0.970281195                                                                                                                                         | 0.94741675  | 0.892943908 | 1           | 0.895070659 | 0.943051897 |             |
|         | 0.870006507                                                                                                                                         | 0.973022118 | 1           | 0.900363553 | 0.924035036 | 0.784865562 |             |
|         | 0.903997695                                                                                                                                         | 1           | 0.926537913 | 0.739835946 | 0.769979663 | 0.881411081 | 1           |
|         | 1.308310766                                                                                                                                         | 1.01490872  | 0.901789181 | 1.002610068 | 1           | 1.047897867 |             |
|         | 1.002378772                                                                                                                                         | 1.043248386 | 1.14364945  |             |             | 0.970822957 |             |
|         | 1.077044702                                                                                                                                         | 0.927654906 | 1           | 1.209517678 | 1.082150327 | 1.230851093 |             |
|         | 0.417224902                                                                                                                                         | 1.356613842 | 0.964937646 |             |             |             |             |
| YLR192C | YLR192C::HCR1::High Copy suppressor of RPG1                                                                                                         |             |             |             |             | 1           | 0.80174429  |
|         | 0.90001674                                                                                                                                          | 0.689581229 | 0.565745033 | 1           | 0.798112119 | 0.899435539 |             |
|         | 0.719121627                                                                                                                                         | 0.744164742 | 1           | 0.918381044 | 1.095452941 | 1.08786155  |             |
|         | 0.658256727                                                                                                                                         | 1           | 1.270144917 | 0.833190307 | 0.81224291  | 0.818093353 | 1           |
|         | 1.291635883                                                                                                                                         | 0.85723777  | 0.864609865 | 1.2172804   | 1           | 1.116623511 |             |
|         | 1.385516398                                                                                                                                         | 2.013950726 | 1.089203587 | 1.050140076 | 1           | 1.129722605 |             |
|         | 1.24048258                                                                                                                                          | 1.546756779 | 1.640174183 | 0.69287772  | 1           | 1.130500528 |             |
|         | 1.163855247                                                                                                                                         | 1.701278322 | 0.786776117 | 0.934167241 | 1.058629408 |             |             |
| YAL028W | YAL028W::YAL028W::molecular_function                                                                                                                | unknown     |             |             |             | 1           | 1.043544581 |
|         | 1.267855675                                                                                                                                         | 1.062232803 | 1.141097557 | 1           | 1.095906816 | 1.138423465 |             |
|         | 1.10173708                                                                                                                                          | 1.052748628 | 1           | 1.100302464 | 1.211435741 | 1.455644478 |             |
|         | 0.927944449                                                                                                                                         | 1           | 1.31682044  | 1.139320955 | 1.426186091 | 1.637833037 | 1           |
|         | 0.952312682                                                                                                                                         | 0.842739706 | 1.036787303 | 0.948423779 | 1           | 1.253476477 |             |
|         | 1.107391138                                                                                                                                         | 0.807750544 | 0.834050901 | 0.933767514 | 1           | 1.410426687 |             |
|         | 1.367448373                                                                                                                                         | 0.933095974 | 0.705161058 | 0.655805008 | 1           | 1.488027412 |             |
|         | 1.367190923                                                                                                                                         | 1.287779578 | 1.32368534  | 1.239007927 |             |             |             |
| YLR194C | YLR194C::YLR194C::molecular_function                                                                                                                | unknown     |             |             |             | 1           | 0.89000404  |
|         | 1.162475886                                                                                                                                         | 1.003062461 | 0.950867723 | 1           | 0.907700967 | 1.057401325 |             |
|         | 1.440867054                                                                                                                                         | 1.328736869 | 1           | 0.855898246 | 1.185497503 | 0.889811374 | 1           |
|         | 0.977807112                                                                                                                                         | 1.095040664 | 1.325013383 | 1.320463843 | 1           | 1.761998554 |             |
|         | 2.519228957                                                                                                                                         | 1.868830265 | 2.209636468 | 1           | 1.059746975 | 1.191346702 |             |
|         | 1.352418136                                                                                                                                         | 1.05425324  | 1.012575541 | 1           | 0.878425015 | 1.126588704 |             |
|         | 0.937644397                                                                                                                                         | 0.530424509 | 1.866701774 | 1           | 0.919008822 | 0.824715036 |             |
|         | 0.857249652                                                                                                                                         | 0.91583354  | 0.953579988 | 1.069136866 |             |             |             |
| YAL030W | YAL030W::SNC1::Involved in mediating targeting and transport of secretory proteins; forms a complex with Snc2p and Sec9p                            |             |             |             |             | 1           | 1.265057332 |
|         | 1.681950021                                                                                                                                         | 1.269648775 | 2.122032713 | 1           | 1.169980979 | 1.357305031 |             |
|         | 2.104235607                                                                                                                                         | 1.820247032 | 1           | 1.114073442 | 1.50750219  | 2.560460251 |             |
|         | 1.479626756                                                                                                                                         | 1           | 1.263627691 | 1.07024003  | 1.357957732 | 1.539892887 | 1           |
|         | 1.455812194                                                                                                                                         | 1.882559296 | 1.969572084 | 1.308754039 | 1           | 0.948595904 |             |
|         | 1.102288287                                                                                                                                         | 0.854540984 | 0.6774723   | 0.837317547 | 1           | 1.134800985 |             |
|         | 1.791884578                                                                                                                                         | 1.855852026 | 1.403392048 | 2.007106911 | 1           | 1.217501739 |             |
|         | 2.004608783                                                                                                                                         | 0.957060357 | 1.630332459 | 1.389391897 | 1.358092823 |             |             |
| YLR196W | YLR196W::PWP1::Protein with periodic tryptophan residues that resembles members of beta-transducin superfamily because of presence of WD-40 repeats |             |             |             |             | 1           |             |
|         | 0.695142858                                                                                                                                         | 0.651855474 | 0.748385542 | 0.848386506 | 1           | 0.475397286 |             |
|         | 0.322667471                                                                                                                                         | 0.26463811  | 0.918122612 | 1           |             | 0.340713481 |             |
|         | 0.287977216                                                                                                                                         | 1           | 0.53246754  |             | 0.504366587 | 1           | 0.760533114 |



|         |                                                                                                                                                             |             |             |             |             |             |   |
|---------|-------------------------------------------------------------------------------------------------------------------------------------------------------------|-------------|-------------|-------------|-------------|-------------|---|
|         | 0.571960746                                                                                                                                                 | 0.684293201 | 0.971145042 | 0.752408989 | 1           | 0.740746765 |   |
|         | 0.43910976                                                                                                                                                  | 0.368905519 | 0.765509534 | 0.804367055 | 1           | 0.524461703 |   |
|         | 0.464956848                                                                                                                                                 | 0.660880826 | 0.771632247 | 0.446258428 | 0.660220503 |             |   |
| YAL032C | "YAL032C::PRP45::protein required for pre-mRNA splicing in vivo and in vitro, associated with the spliceosome, weakly associated with U2, U5 and U6 snRNPs" |             |             |             |             |             |   |
|         | 1                                                                                                                                                           | 0.860802913 | 1.043081134 | 0.996957234 | 1.082153876 | 1           |   |
|         | 1.052517218                                                                                                                                                 | 1.013834662 | 1.079346101 | 1.088415841 | 1           | 0.877070598 |   |
|         | 1.081324321                                                                                                                                                 | 1.279894795 | 1.049442895 | 1           | 1.289011239 | 1.298348897 |   |
|         | 1.537777591                                                                                                                                                 | 1           | 0.889404723 | 1.001836795 | 0.799242077 | 0.799133819 | 1 |
|         | 0.889230583                                                                                                                                                 | 0.956507661 | 1.021919859 | 0.943805798 | 0.988507811 | 1           |   |
|         | 1.022524757                                                                                                                                                 | 0.962860673 | 1.222627198 | 1.082131252 | 1.03617572  | 1           |   |
|         | 1.060433178                                                                                                                                                 | 1.131997146 | 1.132287616 | 0.972878453 | 0.98280308  | 0.939544512 |   |
| YLR198C | YLR198C::YLR198C::molecular_function unknown 1.06136938                                                                                                     |             |             |             |             |             |   |
|         | 0.965717653                                                                                                                                                 | 0.721204149 | 1.461600747 | 0.841455951 | 0.601913312 |             |   |
|         | 1.232231409                                                                                                                                                 | 1.334431029 | 0.718556691 | 0.482318952 | 0.551563155 |             |   |
|         | 1.067098043                                                                                                                                                 | 1           | 0.626972337 | 0.181324298 | 0.196818968 | 0.552062557 | 1 |
|         | 0.947752106                                                                                                                                                 | 0.490048542 | 0.245126731 | 0.471209518 | 1           | 0.787908565 |   |
|         | 0.678007911                                                                                                                                                 | 0.529494664 | 0.679584779 | 0.762586277 | 1           | 0.731716547 |   |
|         | 0.710554656                                                                                                                                                 | 0.384583999 | 0.648410523 | 1.071549252 | 1           | 0.834478163 |   |
|         | 0.832793761                                                                                                                                                 | 1.123847382 | 1.484541119 | 0.976841149 | 1.271406067 |             |   |
| YLR212C | YLR212C::TUB4::spindle pole body component that organizes both cytoplasmic and nuclear microtubule arrays 1.05398168 0.848419415                            |             |             |             |             |             |   |
|         | 1.056647962                                                                                                                                                 | 0.867366512 | 1.046069019 | 1.073119212 | 1.077952626 |             |   |
|         | 0.991029536                                                                                                                                                 | 0.845115909 | 0.724510926 | 1.153249016 | 1           | 0.953218994 |   |
|         | 0.758189252                                                                                                                                                 | 0.710141887 | 1           | 1           | 1.128435468 |             |   |
|         | 0.933433682                                                                                                                                                 | 1.248493762 | 1.050364356 | 0.881591582 | 1           | 0.939395719 |   |
|         | 0.710931339                                                                                                                                                 | 0.731055615 | 0.787471054 | 0.585523445 | 1           | 1.022562262 |   |
|         | 0.840270697                                                                                                                                                 | 1.014299549 | 0.697035623 | 0.929103206 | 0.76879789  |             |   |
| YAL035W | YAL035W::FUN12::Functions in general translation initiation by promoting Met-tRNA <sup>i</sup> Met binding to ribosomes. 1 1.209934163 1.102327775          |             |             |             |             |             |   |
|         | 1.149330807                                                                                                                                                 | 1.012914303 | 1           | 1.133599348 | 1.148888296 | 1.237576394 |   |
|         | 1.109655727                                                                                                                                                 | 1           | 1.314239313 | 0.998708184 | 0.86419877  | 1.111460831 | 1 |
|         | 0.626943645                                                                                                                                                 | 0.526625512 | 0.54266674  | 0.498350687 | 1           | 0.681618113 |   |
|         | 0.691957705                                                                                                                                                 | 0.666584894 | 0.564101801 | 1           | 0.782776682 | 0.826536339 |   |
|         | 0.833707219                                                                                                                                                 | 0.770583845 | 0.746295001 | 1           | 1.038488373 | 0.752731986 |   |
|         | 1.014668174                                                                                                                                                 | 1.137815679 | 0.713835944 | 1           | 0.763629375 | 0.70434914  |   |
|         | 0.938924747                                                                                                                                                 | 0.712216759 | 0.790614025 | 0.819584055 |             |             |   |
| YAL049C | YAL049C::YAL049C::molecular_function unknown 1 1.48435154                                                                                                   |             |             |             |             |             |   |
|         | 1.686435978                                                                                                                                                 | 1.389560409 | 1.796488673 | 1           | 1.425330332 | 1.466352251 |   |
|         | 1.637517101                                                                                                                                                 | 1           | 1.098142332 | 1.20899126  | 1.824404764 | 1.324445641 | 1 |
|         | 0.884702251                                                                                                                                                 | 0.704970772 | 0.638779029 | 1.28312243  | 1           | 0.860960307 |   |
|         | 1.025815971                                                                                                                                                 | 1.754427236 | 1           | 1.062257968 | 0.988388291 | 0.7854915   |   |
|         | 0.789468268                                                                                                                                                 | 0.771968996 | 1           | 1.155059626 | 1.074621398 | 1.129243271 |   |
|         | 0.814841976                                                                                                                                                 | 1.501182111 | 1           | 1.159045993 | 1.212015269 | 0.852027791 |   |
|         | 1.329596693                                                                                                                                                 | 1.343873371 | 1.235505476 |             |             |             |   |
| YAL060W | "YAL060W::BDH1::(2R,3R)-2,3-butanediol dehydrogenase"                                                                                                       |             |             |             |             |             |   |
|         | 0.983798344                                                                                                                                                 | 0.895110963 | 1.042112051 | 0.681362404 | 1.063019209 |             |   |
|         | 1.209318529                                                                                                                                                 | 0.975185282 | 0.861123061 | 1.104358922 | 1.481861541 |             |   |
|         | 2.265849486                                                                                                                                                 | 1           | 3.841584009 | 5.052192689 | 5.982768214 | 5.100318664 | 1 |
|         | 2.778086673                                                                                                                                                 | 2.825827546 | 3.658492383 | 3.122849826 | 1           | 1.88023614  |   |
|         | 2.082592916                                                                                                                                                 | 1.288893041 | 1.265723018 | 1           | 1.253892228 | 1.676391738 |   |
|         | 1.092150345                                                                                                                                                 | 1.612962468 | 1           | 1.627690966 | 1.702046189 | 1.169661404 |   |
|         | 1.48868784                                                                                                                                                  | 3.08875903  | 1.464918933 |             |             |             |   |
| YAL062W | YAL062W::GDH3::Involved in glutamate biosynthesis 1                                                                                                         |             |             |             |             |             |   |
|         | 1.033963772                                                                                                                                                 | 0.719314132 | 0.964469532 | 0.582605707 | 1           | 1.397961785 |   |
|         | 1.438677606                                                                                                                                                 | 0.811502829 | 0.9375472   | 1           | 1.262223787 | 1.058128018 |   |
|         | 0.826633741                                                                                                                                                 | 0.699677265 | 1           | 1.680309445 | 1.151395734 | 1.876099465 | 1 |

|         |                                                                                                                                                                        |             |             |             |             |             |
|---------|------------------------------------------------------------------------------------------------------------------------------------------------------------------------|-------------|-------------|-------------|-------------|-------------|
|         | 0.928282962                                                                                                                                                            | 0.675328699 |             |             |             | 1.038393386 |
|         |                                                                                                                                                                        | 0.553746846 | 0.701271664 | 0.758365071 | 1           | 1.113758703 |
|         | 1.216186643                                                                                                                                                            |             | 1.207485451 |             |             |             |
| YAR015W | YAR015W::ADE1::phosphoribosyl amino imidazolesuccinocarboxamide synthetase                                                                                             |             |             |             |             |             |
|         | 1                                                                                                                                                                      | 0.773286193 | 0.64202394  | 0.630369822 | 0.740654293 | 1           |
|         | 0.760374507                                                                                                                                                            | 0.679095179 | 0.620862516 | 0.688437937 | 1           | 1.114183609 |
|         | 1.195185737                                                                                                                                                            | 0.566582518 | 0.651470536 | 1           | 2.359036712 | 1.807233794 |
|         | 0.582565202                                                                                                                                                            | 0.486838263 | 1           | 2.268319883 | 1.478466396 | 0.89577388  |
|         | 0.844768344                                                                                                                                                            | 1           | 1.017576004 | 1.202952098 | 1.364656755 | 1.229346346 |
|         | 1.518075446                                                                                                                                                            | 1           | 0.994560752 | 1.211627976 | 0.774921694 | 1.246242392 |
|         | 4.111190446                                                                                                                                                            | 1           | 0.859199522 | 0.926047237 | 0.58862602  | 2.480234273 |
|         | 3.907571056                                                                                                                                                            | 1.154948061 |             |             |             |             |
| YLR278C | YLR278C::YLR278C::molecular_function unknown                                                                                                                           |             |             |             |             |             |
|         | 1                                                                                                                                                                      |             |             |             | 1           | 1.353509732 |
|         | 0.989480006                                                                                                                                                            | 1.11122266  | 0.945975735 | 1           | 1.123056889 | 0.85203152  |
|         | 0.918899882                                                                                                                                                            | 1           | 1.27417526  | 1.148161449 | 0.920223784 | 1.061579258 |
|         | 1.064092164                                                                                                                                                            | 0.590656057 | 0.895936458 | 0.738629764 | 1           | 0.957604896 |
|         | 1.001294261                                                                                                                                                            | 0.760149544 | 0.553193583 | 1           | 0.955440831 | 1.093575908 |
|         | 1.039930622                                                                                                                                                            | 0.999005565 | 1.018801898 | 1           | 1.515119846 | 1.110009103 |
|         | 1.114788676                                                                                                                                                            | 1.163067248 | 1           | 0.777084869 | 1.201184942 | 1.117245226 |
|         | 0.853834348                                                                                                                                                            | 1.150334022 | 1.068261305 |             |             |             |
| YLR280C | YLR280C::YLR280C::molecular_function unknown                                                                                                                           |             |             |             |             |             |
|         | 1                                                                                                                                                                      |             |             |             | 1           | 1.394428515 |
|         | 1.454740965                                                                                                                                                            | 1           | 1.447038798 | 1.762912532 |             | 1           |
|         | 1.969138227                                                                                                                                                            | 1.046095778 | 1.832882991 | 1           |             | 1.437465051 |
|         | 1.589538397                                                                                                                                                            | 0.429577609 |             | 0.494645984 | 1           | 1.150703839 |
|         | 1.051873307                                                                                                                                                            | 0.983696256 | 0.96030884  | 1.110596318 | 1           | 0.988803406 |
|         | 1.180628417                                                                                                                                                            | 0.968793561 | 0.856845782 | 1.318516633 | 1           | 0.923592277 |
|         | 0.993243267                                                                                                                                                            | 0.698430912 | 1.052223913 | 0.88113304  | 0.556021232 |             |
| YLR282C | YLR282C::YLR282C::molecular_function unknown                                                                                                                           |             |             |             |             |             |
|         | 1                                                                                                                                                                      |             |             |             | 1           | 1.068505863 |
|         | 1.149519946                                                                                                                                                            | 1.45984161  | 1.471442996 | 1           | 1.362692718 | 1.65930994  |
|         | 1.340807984                                                                                                                                                            | 1           | 1.216961825 | 1.134986466 | 1.348054286 | 1.472744917 |
|         | 0.744691958                                                                                                                                                            | 0.432136468 | 0.53717824  | 1.237967187 | 1           | 1.405271641 |
|         | 2.072918893                                                                                                                                                            | 2.294130877 | 2.29289307  | 1           | 1.090271098 | 1.208260636 |
|         | 1.482578258                                                                                                                                                            | 1.004368173 | 1           | 1.11816875  | 1.302480035 | 1.332584863 |
|         | 1.204255172                                                                                                                                                            | 1.391980126 | 1           | 1.168666081 | 0.857330824 | 1.090988669 |
|         | 0.377134834                                                                                                                                                            | 1.249084884 | 1.14969428  |             |             |             |
| YLR296W | YLR296W::YLR296W::molecular_function unknown                                                                                                                           |             |             |             |             |             |
|         |                                                                                                                                                                        |             |             |             | 1           | 0.638258243 |
|         | 267.6358435                                                                                                                                                            | 0.822596271 | 0.541235796 | 1           | 0.879282423 | 0.661541432 |
|         | 1                                                                                                                                                                      | 1.068970454 | 0.769744841 | 1.241788577 | 0.730422705 |             |
| YLR298C | YLR298C::YHC1::U1 snRNP protein required for pre-mRNA splicing                                                                                                         |             |             |             |             |             |
|         | 1                                                                                                                                                                      |             |             |             |             | 1           |
|         | 0.945176232                                                                                                                                                            | 1.201860448 | 0.9725233   | 1.615861925 | 1           | 0.892165511 |
|         | 0.927590014                                                                                                                                                            | 1.43688052  | 1           | 1.114815975 | 1.163894233 | 1.619529676 |
|         | 1.160046977                                                                                                                                                            | 1           | 0.842969994 | 0.542920653 | 0.661883025 | 1.003473115 |
|         | 1.954213113                                                                                                                                                            | 1.90770454  | 2.511484788 | 1.414076367 |             | 1.259108596 |
|         | 0.680959749                                                                                                                                                            | 0.743648704 | 1.167383867 | 1           | 1.231080755 | 2.057326409 |
|         | 1.629560929                                                                                                                                                            | 2.153665258 | 3.620168071 | 1           | 1.326917555 | 1.467462156 |
|         | 1.413931452                                                                                                                                                            | 1.429999769 | 1.23112736  |             |             |             |
| YLR300W | "YLR300W::EXG1::Has a broad specificity for beta-1,3-linkages as well as beta-1,6-linkages, and also for other beta-glucosidic linked substrates, such as cellobiose." |             |             |             |             |             |
|         | 1                                                                                                                                                                      |             |             |             |             | 1           |
|         | 0.927559474                                                                                                                                                            | 0.963140251 | 0.798510349 | 0.932203853 | 1           | 0.698036639 |
|         | 0.559882596                                                                                                                                                            | 0.448968102 | 0.903314463 | 1           | 0.645675909 | 0.597271726 |
|         | 0.500978555                                                                                                                                                            | 0.564039554 | 1           | 0.446958866 | 0.301409145 | 0.279568787 |
|         | 0.658702744                                                                                                                                                            | 1           | 0.785989078 | 0.740557883 | 1.187431995 | 1.100508585 |
|         | 0.953212711                                                                                                                                                            | 1           | 0.690231882 | 0.686346117 | 0.6778623   | 0.581785122 |

0.510282035 1 0.712717184 0.532611094 0.899599924 0.692654155  
 0.925571723 0.72501668  
 YLR302C YLR302C::YLR302C::molecular\_function unknown 1.258375259  
 0.866640472 1.359665492 0.549201599 1.267632277 1.316960019  
 0.772463346 0.750849764 1.197192541 1.714559311 0.853053202  
 0.590330353 0.25687761 0.643639925 1 0.722199867  
 0.897445672 1 0.915691073 0.71614556 0.977955092 1.447877578  
 0.88249873 1 1.294228856 1.200860203 0.695312071 1  
 1.554909108 0.926644374 1.08252339 0.712757945  
 YLR214W YLR214W::FRE1::Ferric (and cupric) reductase 0.322597187  
 0.258511684 0.355570415 0.641224667 0.280888888 0.272398732  
 0.310045317 0.588537343 1.479310462 1.469168975 0.446392211  
 1.805255698 1 3.944374523 3.076053043 1.674866369 2.702197079 1  
 2.408878085 1.06662865 0.978067785 3.45327288 1 2.317244609  
 1.93610883 1.734939917 0.997302235 1.005247522 1 2.739486914  
 2.037901744 1.396867329 1.404163889 0.555707468 1 2.215395328  
 2.080140737 1.379400978 0.755969655 0.696547477 5.180191487  
 YLR304C "YLR304C::ACO1::Aconitase, mitochondrial" 1 0.975148881  
 0.841787984 1.258929225 0.603473613 1 1.297583197 1.424964972  
 0.645055849 0.557331937 1 0.469561818 0.388744219 0.414260442  
 0.69880854 1 0.860928796 0.390586159 1.430901841 0.84002463 1  
 0.311438175 0.110236537 0.375918832 0.672344711 1 0.281433119  
 0.174943658 0.314411881 1.191839961 0.771486331 1 0.200652259  
 0.099417093 0.103721772 0.355359109 0.35883577 1 0.300530693  
 0.171024963 0.528120021 0.829269064 1.321288493 0.52012064  
 YLR216C YLR216C::CPR6::a cyclophilin related to the mammalian CyP-40;  
 physically interacts with RPD3 gene product 1 0.862383951 1.167902737  
 1.124735321 1.00012459 1 0.905071881 1.1480132 1.336692735  
 1.064977212 1 0.890603576 1.339288857 1.905518492 0.855893354 1  
 1.284013315 1.483460951 2.327156165 1.770500636 1 1.333388172  
 1.489994474 3.204646018 2.148205415 1 1.008653877 1.223330514  
 1.191892437 0.663741654 0.839148465 1 1.711617675 1.963435435  
 0.898484315 0.503308069 0.595941976 1 1.446662965 1.406971468  
 0.753909107 0.640030803 0.890846256 1.105037457  
 YLR306W "YLR306W::UBC12::Required for conjugation of RUB1 (ubiquitin-like  
 protein) to other proteins. Collaborates with ULA1/UBA3 RUB1-activating enzyme.  
 Related to ubiquitin-conjugating enzymes (UBC1-8, UBC10-11, UBC13). Related to  
 SMT3-conjugating enzyme UBC9" 1 1.337552985 1.77240589 1.082811569  
 2.051505729 1 1.096333574 1.255340325 1.891356167 1  
 1.203544488 1.27703962 2.004248855 1.4774837 1 1.098304503  
 1.150894867 1.342720918 1 1.516608246 1.55440906 1.657682657  
 1.167025014 1 1.076113024 1.397634816 1.034737656 0.958587812  
 1.157376205 1 1.153855 1.601458441 1.420535443 1  
 1.356872101 1.092998979 1.747725842 1.652781073 1.595386951  
 YLR320W YLR320W::MMS22 1 0.891368348 0.888835418 1.038096019  
 0.89951298 1 0.988152592 1.070399779 0.898093081 0.847378717 1  
 0.896923638 0.928613954 0.731066199 0.864606362 1 0.93028968  
 0.691862069 0.676825735 0.859521047 1 0.817876577 0.658202215  
 0.63389656 0.516052436 1 0.930563444 0.8687408 0.962403112  
 0.956349815 1.003927225 1 0.857118325 0.858510462 0.593396025  
 0.882290368 0.819607361 1 0.826149553 0.71065335 1.000126465  
 1.01457238 0.907711466 0.879126451  
 YLR218C YLR218C::YLR218C::molecular\_function unknown 0.390317981  
 1.134262719 0.769284474 1.259933045 0.644107302 0.897378063  
 1.204406793 1.293543181 0.751108767 1.104256579 1.748174796  
 0.856615375 1 2.012941927 1.192080566 1.459024513 2.263538428 1  
 3.241234048 6.216990687 4.723430156 1.946109333 1.154956092

1.765329102 0.962840687 1.073610364 1 1.495643682 2.043504583  
2.204388814 4.184532792 1 4.089616154 1.313436  
YLR220W YLR220W::CCC1::Functions in the homeostasis of both calcium and  
manganese ions 1 1.461029752 1.193738728 1.155980126 1.039184146 1  
1.321382258 1.713047407 1.170353806 1.248035084 1 0.748656482  
0.745785445 1.389192716 1.030536284 1 0.759000645 0.876819248  
0.850503124 1 0.800848302 0.433571613 0.584922144 1  
0.64102687 0.429224102 0.354676819 1.195215354 0.840132809 1  
0.376532933 0.276387886 0.211805919 0.333689062 1.734647534 1  
0.532315242 0.383999562 0.832332541 1.580489042 1.474503432 1.280162299  
YLR222C YLR222C::UTP13::part of small (ribosomal) subunit (SSU) processosome  
(contains U3 snoRNA) 1 0.788959274 0.547281626 1.013908737 0.768493855 1  
0.887239325 0.80331814 0.85955837 0.920549825 1 0.390629746  
0.336571269 0.205827096 0.996295017 1 0.122064778 0.111412913  
0.238719073 1 0.273327601 0.145013974 0.491576228 1  
0.725588539 0.597559062 0.682339416 0.947278118 0.933371334 1  
0.746332898 0.650141819 0.53795532 0.872650048 0.779441471 1  
0.606363387 0.72464447 0.905638082 0.868815723 0.584459974 0.729394796  
YAR019C "YAR019C::CDC15::Required for mitosis and sporulation, cell division  
cycle blocked at 36 degrees" 1 1.552641282 1.509153057 1.727614405 1  
1.771868254 1.468224628 1.430857074 1.686821087 1 1.278155551  
1.511375145 1.506253554 1.271562999 1 0.901768809 0.697392027  
1 0.859654548 0.8042195  
0.993793852 0.919554016 1 1.019943698 2.028933516 1  
0.735746797 0.644816125 0.502115176 1.188820834 0.682944863 0.742529143  
YLR236C YLR236C::YLR236C::molecular\_function unknown  
1.005576312 1.141627097 0.878135207 1.180760702 0.788363138  
0.814040088 1.003085845 1.216477216 1.172828777  
2.507270011 1 1.07720697  
0.985614068 1.192025963 0.986193436 1 0.82323382 0.885249523  
1.044378086 1.015203339 1 0.75286261 1.081441441  
0.42019159 0.874049495 0.972818213  
YAR023C YAR023C::YAR023C::molecular\_function unknown 1 1.06789464  
0.961157748 1.134038913 1.066283694 1 1.061104224 1.008270262  
1.151839441 0.886299384 1 1.011440764 1.078109389 0.92351335  
0.867923025 1 1.428050165 2.540520873 1.194949455 1  
0.860380941 1.405691329 0.843510924 1 0.999473665 1.099679476  
1.103147848 1.04765561 0.988654051 1 0.956901767 0.880704645  
1.154583078 0.904199551 1.356302353 1 1.006117671 1.155466504  
1.053352497 0.801402567 0.90276836  
YLR238W YLR238W::YLR238W::molecular\_function unknown 0.808955565  
1.433771798 1.043580939 1.048490444 0.786441535  
0.909445118 1.095919463 1.187816218 1 0.598461083  
0.229779023 0.544558896 1 1.764120296 2.371668147  
2.158752391 1 0.925874035 1.007508727 3.895218471 1.074546166 1  
1.130493252 1.529684402 1.463464001 1.920536274 1 1.196252425  
0.814854455 1.07471743 1.916582836 0.887007122  
YAR028W YAR028W::YAR028W::molecular\_function unknown 1 1.635419404  
1.386406171 1.459683746 1 1.516220372 1.500574991 1.723661338  
1.532850593 1 1.465915987 1.485159241 1.642578112 1.619817633 1  
0.841912499 0.586420687 0.824929272 1 1.23571008 1.233453504  
0.88108141 1.214758949 1 1.360691328 1.477877535 1.34505384  
1.283617364 1.406930493 1 1.189702774 1.237196834 1.752821505  
1.045725092 1.145537068 1 1.429701751 1.215774429 0.983065473  
1.23056604 1.459983596 1.34320725  
YLR240W YLR240W::VPS34::phosphatidylinositol 3-kinase 1 0.996516212  
0.850952788 0.759496191 1 1.174420503 1.220279291 0.894709037

|             |                                                                             |             |             |             |             |             |
|-------------|-----------------------------------------------------------------------------|-------------|-------------|-------------|-------------|-------------|
| 0.769489847 | 1                                                                           | 1.371521183 | 1.169887933 | 0.772961204 | 1.265209453 | 1           |
| 1.069614828 |                                                                             | 1.239704015 | 0.845344751 | 1           | 1.10283138  |             |
| 1.097323066 |                                                                             | 1           | 1.04743511  | 0.924512892 | 1.142596043 | 1.013435139 |
| 0.927970146 | 1                                                                           | 1.198460038 | 0.821784024 | 1.287591943 | 1.138095211 |             |
| 0.528714174 | 1                                                                           | 1.227317905 | 0.941049678 | 1.164051496 | 0.506662811 |             |
| 1.14135257  | 0.731146021                                                                 |             |             |             |             |             |
| YAR030C     | YAR030C::YAR030C::molecular_function                                        | unknown     |             | 1           | 1.098498081 |             |
| 1.038691326 | 1.235190767                                                                 | 1.167050426 | 1           | 1.148503636 | 1.026126289 |             |
| 1.025857416 | 1                                                                           | 0.932817989 | 0.912035836 | 0.808422204 | 1.059794423 | 1           |
| 0.789516878 |                                                                             | 0.879840025 | 0.689146809 | 1           | 1.217017051 | 1.474314599 |
| 1.080657078 | 1.156276531                                                                 | 1           | 1.099566007 | 0.934831279 | 0.768380471 |             |
| 0.956101564 | 1.108558582                                                                 | 1           | 0.653209201 | 0.801892136 | 0.675311198 |             |
| 0.817193163 | 1                                                                           | 0.585045008 | 0.905307174 | 0.817258205 | 1.358610545 |             |
| 0.856494304 | 1.290669756                                                                 |             |             |             |             |             |
| YLR242C     | YLR242C::ARV1::similar to Nup120p and C.elegans R05H5.5 protein and Nup120p |             |             |             |             |             |
| 1           | 1.135734278                                                                 | 0.948641265 | 0.816092062 | 0.853952577 | 1           |             |
| 0.916965133 | 0.725060951                                                                 | 0.974910567 | 1           | 0.916658486 | 0.926800353 |             |
| 1.426843127 | 0.933789296                                                                 | 1           | 0.737509421 | 0.723128101 | 0.892453939 |             |
| 1.08224683  | 1                                                                           | 1.408388365 | 1.876704334 | 2.187892935 | 1.121502839 | 1           |
| 0.814641258 | 0.69193584                                                                  | 0.700719841 | 0.811512417 | 0.892128032 | 1           |             |
| 0.883568005 | 0.830710053                                                                 | 0.80318176  | 0.765434474 | 1.254858033 | 1           |             |
| 1.24985128  | 1.242868831                                                                 | 1.209756632 | 0.86995523  | 1.36814578  | 1.189972988 |             |
| YAR033W     | YAR033W::YAR033W::molecular_function                                        | unknown     |             | 1           | 1.549304973 |             |
| 1.392926409 | 1.125553503                                                                 | 1.11895879  | 1           | 1.302154775 | 1.26780117  |             |
| 1.086006627 | 1.170588576                                                                 | 1           | 1.405153889 | 1.768096391 | 1.601815409 |             |
| 1.073561661 | 1                                                                           | 1.046277328 | 0.777045942 | 0.936834046 | 1           |             |
| 1.139350155 | 1.366288211                                                                 | 1.376015177 | 0.797969465 | 1           | 1.386443104 |             |
| 1.488386314 | 1.259784871                                                                 | 1.186919132 | 1.332523235 | 1           | 1.350963195 |             |
| 1.495974924 | 1.696266016                                                                 | 1.326444672 | 1.154241324 | 1           | 1.245898004 |             |
| 1.199362739 | 1.215137735                                                                 | 0.971759741 | 1.317814116 |             |             |             |
| YLR244C     | YLR244C::MAP1::methionine aminopeptidase                                    |             | 1           | 0.788315211 |             |             |
| 0.635637107 | 0.702111289                                                                 | 0.48815891  | 1           | 0.779293352 | 0.680685316 |             |
| 0.599067225 | 0.686483667                                                                 | 1           | 0.780136616 | 0.538278705 | 0.451613027 |             |
| 0.845757651 | 1                                                                           | 0.788585251 | 0.639978955 | 0.571483321 | 0.687886332 | 1           |
| 0.546937527 | 0.279903814                                                                 | 0.369746461 | 0.792047299 | 1           | 0.967285376 |             |
| 0.759053782 | 1.069499615                                                                 | 1.060438371 | 0.875784384 | 1           | 0.988925971 |             |
| 0.752181974 | 0.804686833                                                                 | 0.841184055 | 0.689371154 | 1           | 1.104664235 |             |
| 0.788788695 | 0.976235787                                                                 | 0.655317798 | 0.661263023 | 0.710131055 |             |             |
| YAR064W     | YAR064W::YAR064W::molecular_function                                        | unknown     |             | 1           |             |             |
| 1.550389378 | 1.423424005                                                                 | 1.492503423 | 1           | 1.652403336 | 1.407598203 |             |
| 1.67417751  | 1                                                                           | 1.338079422 | 1.607166777 | 1.199684457 |             |             |
| 0.683145569 | 0.938190009                                                                 |             |             |             |             |             |
| 1.150391107 | 1.013356999                                                                 | 1.043241156 | 0.930079587 | 1           | 1.149058041 |             |
| 1.056971298 | 1.064266297                                                                 | 0.76734974  | 0.98773713  | 1           | 1.357707564 |             |
| 1.487290328 | 1.093595764                                                                 | 1.41489566  | 1.291630784 | 1.50519764  |             |             |
| YAR069C     | YAR069C::YAR069C::molecular_function                                        | unknown     |             | 0.951784853 |             |             |
| 0.935888216 | 0.959389639                                                                 | 0.86662337  | 0.935435841 |             |             |             |
| 0.796922768 | 0.931848658                                                                 | 1.087934939 | 0.873258207 | 1           |             |             |
| 0.20722173  |                                                                             | 0.422895124 | 1           | 0.909271291 | 0.973765024 |             |
| 1.247164837 | 1.043837443                                                                 | 1           | 0.701276362 | 1.04871235  | 1.030285789 |             |
| 1.683982145 | 1                                                                           | 1.082384897 | 1.266856885 | 0.145169549 | 1.234294129 |             |
| 1.034987604 |                                                                             |             |             |             |             |             |
| YAR071W     | "YAR071W::PHO11::Acid phosphatase, secreted"                                |             |             | 1           | 0.928097811 |             |
| 0.698119773 | 0.704104496                                                                 | 0.475131659 | 1           | 0.811591447 | 0.679706344 |             |
| 0.644493397 | 1                                                                           | 0.742576733 | 0.59468922  | 0.331473565 | 0.460226595 | 1           |
| 1.008433059 | 0.67652127                                                                  | 0.775318492 | 0.683128223 | 1           | 0.576906499 |             |
| 0.707859348 | 1.135661584                                                                 | 1           | 1.003104042 | 0.991896977 | 1.199550969 |             |

|         |                                                                                                                        |             |             |             |             |             |
|---------|------------------------------------------------------------------------------------------------------------------------|-------------|-------------|-------------|-------------|-------------|
|         | 1.86824996                                                                                                             | 0.892988684 | 1           |             | 0.797545728 | 1.241079896 |
|         | 0.965653527                                                                                                            | 1           | 0.964154494 | 0.898347673 | 1.421770297 | 1.116502633 |
|         | 0.484498917                                                                                                            | 1.130430592 |             |             |             |             |
| YAR074C | YAR074C                                                                                                                | 1           | 1.362084681 | 0.946113501 | 0.892061002 | 1.021004835 |
|         | 1.031757129                                                                                                            | 0.953641994 | 0.832667172 | 0.899037576 | 1           | 0.957558842 |
|         | 0.775022533                                                                                                            | 0.483330529 | 0.726935418 | 1           | 0.303997645 | 0.376982036 |
|         | 0.403668624                                                                                                            | 1           | 0.899420439 | 0.478634532 | 0.247887116 | 0.482234006 |
|         | 1.007651909                                                                                                            | 0.802521833 | 1.232468067 | 1.412078794 | 1.03434856  | 1           |
|         | 0.991014005                                                                                                            | 1.105811434 | 0.583835781 | 0.532189225 | 1.055758677 | 1           |
|         | 1.021011184                                                                                                            | 1.015812668 | 0.911367168 | 1.255002529 | 1.028261264 | 1.031485049 |
| YBL002W | YBL002W::HTB2::Histone H2B (HTB1 and HTB2 code for nearly identical proteins)                                          | 1           | 1.198911102 | 1.272312835 | 0.850504921 | 1.910778254 |
|         | 1.104042288                                                                                                            | 1.019784723 | 1.225779713 | 1.330921202 | 1           | 1.022198121 |
|         | 0.848912605                                                                                                            | 0.967550402 | 1.26126916  | 1           | 0.877567311 | 0.514638809 |
|         | 0.376264215                                                                                                            | 0.952685596 | 1           | 1.227696215 | 1.290927764 | 1.183364501 |
|         | 0.875708868                                                                                                            | 1           | 0.821656047 | 0.627349621 | 0.654546579 | 0.764467921 |
|         | 0.916908183                                                                                                            | 1           | 0.459377131 | 0.624975466 | 0.449108745 | 0.637089744 |
|         | 0.909982641                                                                                                            | 1           | 0.57156155  | 0.812079983 | 1.097439396 | 1.479128904 |
|         | 1.182019865                                                                                                            | 2.393080427 |             |             |             |             |
| YLR322W | YLR322W::VPS65                                                                                                         | 1           | 1.170304756 | 1.231168464 | 1.563075938 |             |
|         | 1.017546153                                                                                                            | 1           | 1.47210302  | 1.556815458 | 1.186269085 | 1           |
|         | 1.110738566                                                                                                            | 1.344850947 | 0.816779471 | 1.443366948 | 1           | 0.428276138 |
|         | 0.507060136                                                                                                            | 0.630192616 | 1           | 0.954046623 | 0.663461804 | 1           |
|         | 0.888694603                                                                                                            | 0.827837955 | 0.94005451  | 1.004144694 | 1.120317413 | 1           |
|         | 0.99168059                                                                                                             | 0.786856922 | 1.272754342 | 0.92949533  | 1           | 1.034069886 |
|         | 0.735242489                                                                                                            | 1.069252565 | 0.897514579 |             |             |             |
| YLR324W | YLR324W::YLR324W::molecular_function unknown                                                                           | 1           | 0.949178733 |             |             |             |
|         | 0.986377311                                                                                                            | 0.902395425 | 0.664006823 | 1           | 1.129820647 | 1.339839751 |
|         | 0.999200662                                                                                                            | 0.869902854 | 1           | 1.176107822 | 1.326619456 | 1.474925704 |
|         | 0.798724151                                                                                                            | 1           | 1.559835174 | 1.210443063 | 1.901847286 | 1.210950852 |
|         | 1.658960035                                                                                                            | 1.609029396 | 1.6029504   | 0.670054667 | 1           | 0.952103395 |
|         | 1.147160074                                                                                                            | 0.992803765 | 0.842883091 | 0.921087464 | 1           | 1.110052132 |
|         | 1.004822331                                                                                                            | 0.965240464 | 0.840731818 | 1           | 1.098430861 | 0.95017243  |
|         | 1.109155944                                                                                                            | 0.601339504 | 1.126053154 | 0.95705708  |             |             |
| YLR326W | YLR326W::YLR326W::molecular_function unknown                                                                           | 1           | 1.01040694  |             |             |             |
|         | 1.446954844                                                                                                            | 1.141711907 | 1.694240107 | 1           | 1.079095289 | 1.286276039 |
|         | 1.796229939                                                                                                            | 1.443831628 | 1           | 1.067598387 | 1.241705631 | 1.922930812 |
|         | 1.714041172                                                                                                            | 1           | 1.409131629 | 1.023361882 | 1.720941518 | 1.741735439 |
|         | 1.129128235                                                                                                            | 1.571612291 | 2.004703647 | 0.88111888  | 1           | 1.043697019 |
|         | 1.278935278                                                                                                            | 1.167731567 | 0.963953155 | 1.357442429 | 1           | 1.103621456 |
|         | 1.276640232                                                                                                            | 1.365873865 | 1.70207501  | 1.023044053 | 1           | 1.002500379 |
|         | 0.854581212                                                                                                            | 1.006738232 | 0.972066346 | 1.691977187 |             |             |
| YLR328W | YLR328W::NMA1::NAD(+) salvage pathway                                                                                  | 1           | 1.065647042 |             |             |             |
|         | 0.813992562                                                                                                            | 1.047648181 | 0.805119478 | 1           | 1.031171539 | 0.949675267 |
|         | 0.843221758                                                                                                            | 0.824798656 | 1           | 0.972842145 | 0.921802777 | 0.65009049  |
|         | 0.771412987                                                                                                            | 1           | 1.574766565 | 1.627468367 | 1.399801993 | 0.907792103 |
|         | 0.831252617                                                                                                            | 0.613566859 | 0.539690865 | 0.544708299 | 1           | 1.177664491 |
|         | 0.909802089                                                                                                            | 1.115655397 | 1.174243719 | 1.042781703 | 1           | 1.350991063 |
|         | 1.182376248                                                                                                            | 0.761209902 | 0.854630138 | 0.412329661 | 1           | 0.923177357 |
|         | 0.816918209                                                                                                            | 0.676234991 | 0.643152361 | 0.495012587 |             |             |
| YLR330W | "YLR330W::CHS5::Involved in chitin synthase III activity, also required for homozygosis in the first stages of mating" | 1           | 0.638827073 |             |             |             |
|         | 0.816432208                                                                                                            | 0.903551342 | 0.788651076 | 1           | 0.852933591 | 0.919442281 |
|         | 0.913655246                                                                                                            | 0.731156113 | 1           | 0.837352804 | 1.030046967 | 0.668270099 |
|         | 0.85601218                                                                                                             | 1           | 1.710916105 | 1.288846909 | 1.502350154 | 0.894184831 |
|         | 1.18308357                                                                                                             | 0.779821445 | 1.099995659 | 0.781959479 | 1           | 0.962714328 |
|         | 1.105762061                                                                                                            | 0.869634644 | 0.63450135  | 1.283249869 | 1           | 1.03776742  |

0.940223029 0.806819587 1.066649339 0.712868589 1 1.078166312  
 0.90411759 1.013229605 0.815451949 0.801474778 0.964061981  
 YLR344W YLR344W::RPL26A::Homology to rat L26 1 1.092168117  
 1.292192715 0.786860706 1.596797249 1 0.944478887 0.99704873  
 1.299596854 1.134180081 1 0.848426276 0.811268208 0.856765865  
 0.851286548 1 0.71108835 0.281535373 0.247193611 0.623183418 1  
 0.980526726 0.750845181 0.653357729 0.75795075 1 1.130098983  
 1.016336274 0.846858218 1.22414336 1.293992147 1 1.016068036  
 1.249273533 0.70058711 0.645196081 1.2970666 1 0.834551029  
 1.013090009 0.682575514 1.484941144 0.737029484 1.024480042  
 YLR346C YLR346C::YLR346C::molecular\_function unknown 1 0.723264833  
 1.091959236 0.840324205 1.040167265 1 0.669353748 0.692636509  
 2.346347317 0.97398198 1 24.68267417 44.45098893 49.85645584  
 31.62849551 1 10.43206219 10.74917421 11.20173168 10.89810983 1  
 2.2250296 3.09213477 3.202391744 1.576769632 1 2.182118804  
 3.029420116 1.752389413 1.812196522 1.456182355 1 2.377074652  
 3.402260673 2.389139118 2.403391 2.849057975 1 1.726960587  
 1.594051925 1.210512627 1.131094764 1.430731347 2.003427806  
 YLR246W YLR246W::ERF2::Mutation has an Effect on Ras Function. Implicated in  
 signaling pathway. 1 0.950498481 0.82747282 0.958809123 0.982739006 1  
 0.894697151 0.820732697 1.11431963 1.061186548 1 0.966728828  
 0.990931572 1.032153697 1.305636871 1 0.898367904 0.674303044  
 1.143044642 1.314427258 1 1.591757242 1.507364842 1.490360154  
 1.190542279 1 1.155918609 1.286714431 1.210491372 1.110473887  
 1.092724093 1 0.869497977 0.969459572 1.128889738 1.015849579  
 1.105115571 1 1.175913234 1.238314701 1.193857635 0.696699157  
 1.416515287 1.330072903  
 YLR348C YLR348C::DIC1::mitochondrial dicarboxylate transport protein 1  
 1.167237993 1.161794158 1.062628968 0.799439558 1 1.160644484  
 1.302532964 1.290555752 1.344675088 1 1.058732556 1.388253009  
 1.500550463 1.528235258 1 1.128863252 0.910810875 1.429649709  
 1.901754337 1 0.81383713 0.777007074 0.965580581 1.484489821 1  
 0.708139106 0.814280754 1.647228269 0.925603251 0.846546727 1  
 0.706134875 0.715242713 0.881525014 1.062420869 0.356682839 1  
 0.754714783 0.680276084 1.097219537 0.836024006 0.667035469 1.09453  
 YLR350W YLR350W::ORM2::Homologous to ORM1. 1 1.205921307 1.27092397  
 0.936913249 1.104472283 1 1.054360029 1.022167563 1.559483442  
 1.402402015 1 1.269023585 1.384246173 1.774462161 1.313453343 1  
 1.898016609 2.747453391 2.665230257 1.841094691 1 0.954739534  
 1.079317064 1.092480269 0.8126898 1 1.278959469 1.468313065  
 1.474307947 2.046192694 1.466866369 1 0.819749765 0.714267735  
 0.738241682 0.868817106 0.522787318 1 1.112868815 1.104081964  
 1.043472448 0.833714042 1.355215359 0.635703034  
 YLL039c YLL039c::UBI4::involved in stress response system  
 0.794180092 0.874612232 0.913525251 1.034770273 0.868091985  
 0.808409154 1.112983165 1.014762301 0.837914231 1.240702018  
 1.653520845 0.991715868 1 1.330414606 0.771242277 0.993573413 1  
 2.093967681 1.570210558 1.586564303 0.68703912  
 1 1.141413556  
 0.817862343  
 YLL039c YLL039c::UBI4::involved in stress response system  
 1 1.184561372  
 1.547556674 1.815667258 1.18313024 1.162620483 1 1.434498602  
 2.792378402 2.155503168 0.91358544 1.208661958 1 1.583757077  
 2.030378423 1.182332209 1.449853795 1.317601883 1.243386042

YLR352W YLR352W::YLR352W::molecular\_function unknown 1 0.940483426  
0.94069202 1.077041066 0.902682175 1 1.180617382 1.212735446  
0.895692964 0.845521452 1 1.180059631 1.128167089 0.919299646  
0.958223901 1 1.336292468 0.866090206 1.170207 1  
1.684089284 1.536616946 1.351035085 0.985592849 1 1.260126999  
0.938010409 1.278310461 1.219132576 1.170000972 1 0.988171214  
0.845211437 0.7721834 0.911161737 0.727205931 1 1.287039798  
1.055400222 0.963215148 1.016295063 0.965006282 1.210988006  
YLL041c "YLL041c::SDH2::Yeast succinate dehydrogenase (SDH) is a tetramer of  
non-equivalent subunits--Sdh1p, Sdh2p, Sdh3p, Sdh4p--that couples the oxidation  
of succinate to the transfer of electrons to ubiquinone." 1 0.930544331  
0.920504634 0.958279615 0.972755171 1 1.198416093 1.302346339  
0.743102493 0.950598743 1 0.52872364 0.491141961 1.16003233  
0.840889218 1 0.254300905 1.983208764 1.846406358 1  
1.479196235 0.322966165 1.663721654 2.582063458 1 0.37392786  
0.286193307 0.302102967 1.417946378 1.136868054 1 0.176815534  
0.085492144 0.120541028 0.139569497 0.951739321 1 0.249215451  
0.155038677 0.48519316 1.020360589 2.215270544 0.962310756  
YLL043w YLL043w::FPS1::Suppressor of tps1/fdp1 and member of the MIP family  
of transmembrane channels; may be involved in glycerol efflux 1  
0.866676703 0.823629339 0.79505381 0.630833822 1 0.899936075  
0.846346562 0.667653296 0.665194406 1 0.836520263 0.820319614  
0.645793967 0.72557901 1 0.581332571 0.54732016 0.514880036 1  
1.002485123 0.839100059 0.959019907 0.761057625 1 0.874290941  
0.926390102 0.963793256 0.978695184 0.978001217 1 0.876377853  
0.78573528 0.747507074 0.842295714 1 0.938806482  
0.910314473 0.667737534 0.766369977 0.755663491  
YLL045c "YLL045c::RPL8B::Homology to human L7a, mouse L7a, rat L7a" 1  
1.145379641 0.9831159 0.964135966 1.182773341 1 1.014489256  
0.935951859 1.040329968 1.137495839 1 0.873240363 0.825119123  
0.605752142 0.954381567 1 0.691772452 0.395912255 0.206074961  
0.454318769 1 1.016833268 0.345790939 0.216515256 0.64637004 1  
0.911978085 0.924309201 1.196895506 1.152950605 1 1.118164058  
1.156656944 1.058930809 0.589450679 0.891908439 1 1.003576478  
0.921121488 0.775474314 0.681266065 0.821321088 0.858987149  
YBL004W YBL004W::UTP20::U3 protein 1 1.299673317 1.270334167  
1.168591609 1.285936037 1 1.173841395 1.087819607 1.279432614  
1.220652637 1 1.186182749 1.097166257 1.298949174 1.152007879 1  
0.925270157 0.719822608 0.707502872 1.189224177 1 1.003669506  
0.926397705 0.889468292 0.825957444 0.98034323 0.824679321  
0.830487999 0.969555 0.872667264 1 0.852755647 0.91331738  
0.94328487 0.919750482 0.895235136 1 1.084505125 1.139346847  
0.958260156 1.136666663 1.029733823  
YBL004W YBL004W::UTP20::U3 protein  
0.711005632 0.847391082  
0.746196891 0.903410837 1 2.551473151  
0.599664399 0.994736158 0.616879109 2.525299671  
YLL047W YLL047W::YLL047W::molecular\_function unknown 1 1.206583128  
1.30438198 1 1.064510307 0.889154246 1  
1.644507785 0.243847587 0.328696451 1  
0.462890308 0.874345786 1 0.962790428 0.988964271  
1 1.08442307 1  
YBL016W YBL016W::FUS3::Required for the arrest of cells in G(sub)1 in  
response to pheromone and cell fusion during conjugation 1 1.132040541  
1.148592623 0.993546645 0.938865353 1 1.174461292 1.0570148



|             |                                                                                                                          |             |             |             |             |             |             |
|-------------|--------------------------------------------------------------------------------------------------------------------------|-------------|-------------|-------------|-------------|-------------|-------------|
| 0.889929063 | 1.031379339                                                                                                              | 1           | 0.904020121 | 1.102682003 | 0.859117074 | 1           |             |
| 0.767813129 | 0.583138485                                                                                                              |             | 1.010175152 | 1           | 0.885682558 | 1.091976589 |             |
| 1.296165203 |                                                                                                                          |             |             |             | 1.116669677 |             |             |
| 0.823994196 | 1.374479025                                                                                                              |             |             |             |             |             |             |
| 1.155823726 |                                                                                                                          |             |             |             |             |             |             |
| YLL049W     | YLL049W::YLL049W::molecular_function unknown                                                                             |             |             |             |             | 1.130321445 |             |
| 1.081877086 | 0.769284474                                                                                                              | 1.136583022 |             | 0.824505761 | 0.688685486 |             |             |
| 1.062633942 | 1.322040781                                                                                                              |             | 0.892167691 | 0.946656695 | 1.28775973  |             |             |
| 0.950598334 | 1                                                                                                                        | 1.249574169 | 0.968261546 | 1.213384603 | 1.548486883 | 1           |             |
| 1.579699134 | 1.8945572                                                                                                                | 1.674000523 | 1.222402319 | 1           | 0.992786433 |             |             |
| 1.172341943 | 0.803898142                                                                                                              | 0.971866138 | 0.887369094 | 1           | 0.840910761 |             |             |
| 1.328302818 | 1.150146979                                                                                                              | 0.963145047 | 1.60257393  | 1           | 1.097788588 |             |             |
| 1.604747018 | 1.137570717                                                                                                              | 1.070061329 | 1.119153132 | 1.785397366 |             |             |             |
| YBL018C     | YBL018C::POP8::Processing Of Precursors - a group of proteins that appear to be components of both RNase P and RNase MRP |             |             |             |             | 1           | 1.331432397 |
| 1.410916854 | 1.170705387                                                                                                              | 1.811674638 | 1           | 1.093834776 | 0.985480018 |             |             |
| 1.730459211 | 1.649134295                                                                                                              | 1           | 1.109924246 | 1.087630719 | 1.094034691 |             |             |
| 1.472588551 |                                                                                                                          | 0.507240236 |             | 0.284039182 | 1           | 0.77697148  |             |
|             | 1                                                                                                                        |             | 0.678228671 | 0.499978123 | 0.780991344 | 0.84059404  |             |
| 0.81858974  | 1.085976706                                                                                                              | 0.829041146 | 1.115706765 | 2.035849809 | 1           |             |             |
| 0.938232801 | 1.1208791                                                                                                                | 1.048744548 | 1.772858526 | 1.065552635 | 2.723190548 |             |             |
| YLL063C     | YLL063C::AYT1::Transacetylase                                                                                            |             |             |             |             | 1.046593979 | 0.94066364  |
| 0.740100547 |                                                                                                                          | 1.012168639 | 0.970969692 |             | 1.016001311 |             |             |
| 1.063367459 | 1.234355798                                                                                                              | 1.147531804 | 1.226673238 | 1           | 0.445962811 |             |             |
| 0.820639413 | 0.947335274                                                                                                              | 1.087103623 | 1           | 0.768160755 | 1.291224412 |             |             |
| 1.503827948 | 0.937822762                                                                                                              | 1           | 1.081729146 | 1.113799516 | 1.223757172 |             |             |
| 1.068505075 | 1.016827546                                                                                                              | 1           | 0.796729246 | 0.850074294 | 1.216594775 |             |             |
| 1.315807966 | 0.997723565                                                                                                              | 1           |             |             | 1.153389717 |             |             |
| 0.890509573 |                                                                                                                          |             |             |             |             |             |             |
| YBL020W     | YBL020W::RFT1::67 kDa integral membrane protein                                                                          |             |             |             |             |             | 1           |
|             |                                                                                                                          | 0.775421361 | 1           | 0.560355214 | 0.380209372 | 0.514501732 |             |
|             |                                                                                                                          | 1.015377625 | 1.468875811 | 0.944432653 | 1           | 0.855607445 |             |
| 0.718148931 | 0.847212237                                                                                                              | 0.768297847 | 0.526876476 |             | 1.039692564 |             |             |
| 1.240899461 | 0.757620269                                                                                                              |             |             |             |             |             |             |
| YLL065W     | YLL065W::YLL065W::not yet annotated                                                                                      |             |             |             |             | 0.994879931 | 1.005576312 |
| 0.784938517 | 0.728352953                                                                                                              |             | 0.864459776 | 0.851246024 | 0.835103555 |             |             |
| 1.192370075 | 0.905405759                                                                                                              | 1.731814804 | 0.782212235 |             | 0.259669777 |             |             |
| 0.305557314 | 0.371330745                                                                                                              |             | 0.432750747 |             | 1           |             |             |
| 1.03431374  | 0.86751649                                                                                                               | 0.97108248  | 0.875848411 | 1.04158199  |             |             |             |
| 0.800969377 | 1.137919313                                                                                                              |             | 1.208211343 |             | 0.590863498 |             |             |
| 0.971787993 |                                                                                                                          | 1.081138286 | 0.837096518 |             |             |             |             |
| YBL022C     | YBL022C::PIM1::mitochondrial ATP-dependent protease                                                                      |             |             |             |             | 1           |             |
| 0.857801936 | 1.083642981                                                                                                              | 1.497398833 | 0.752716383 | 1           | 1.224073289 |             |             |
| 1.490761391 | 0.959660373                                                                                                              | 0.819770642 | 1           | 1.222762207 | 1.564748268 |             |             |
| 0.935725518 | 1.088550023                                                                                                              | 1           | 1.174659398 | 1.124324665 | 1.0361853   |             |             |
| 1.109111844 | 1                                                                                                                        | 0.665141786 | 0.719224472 | 0.581357274 | 0.73238737  | 1           |             |
| 1.06960726  | 1.181535106                                                                                                              | 1.245764904 | 0.808610629 | 0.899440501 | 1           |             |             |
| 1.212846711 | 0.940185268                                                                                                              | 1.113740293 | 0.771523183 | 0.341708795 | 1           |             |             |
| 1.280157127 | 1.332533775                                                                                                              | 1.02242523  | 0.527744657 | 0.997055696 | 0.952678964 |             |             |
| YLL067C     | YLL067C::YLL067C::molecular_function unknown                                                                             |             |             |             |             | 1           | 0.874694795 |
| 0.680705224 |                                                                                                                          | 0.467207911 | 1           | 0.929238081 | 1.04066019  |             |             |
| 0.60295124  | 1                                                                                                                        | 0.887596919 | 0.859798038 | 0.505579853 | 0.866267131 | 1           |             |
| 1.034686705 |                                                                                                                          | 1.031838831 | 0.669618053 | 1           | 0.653645609 | 0.524124594 |             |
| 0.370253202 | 0.987444743                                                                                                              | 1           | 0.779680952 | 0.972596525 | 1.591996878 |             |             |
| 1.130327473 | 1.021482207                                                                                                              | 1           | 0.878403978 | 0.565687513 | 0.846224667 |             |             |

|          |                                                                                                                                                       |             |             |             |             |             |   |                                                   |
|----------|-------------------------------------------------------------------------------------------------------------------------------------------------------|-------------|-------------|-------------|-------------|-------------|---|---------------------------------------------------|
|          | 1.11614499                                                                                                                                            | 0.431346265 | 1           | 0.754706108 | 0.702614732 | 0.990914667 |   |                                                   |
|          | 0.602627966                                                                                                                                           | 0.818357985 | 0.604180558 |             |             |             |   |                                                   |
| YBL024W  | "YBL024W::NCL1::Nuclear protein 1, similar to NOP2 and human proliferation associated nucleolar protein p120"                                         |             |             |             |             |             | 1 | 0.771081422                                       |
|          | 0.643107446                                                                                                                                           | 0.966396445 | 0.837503435 | 1           | 0.93201762  | 0.894608481 |   |                                                   |
|          | 0.692918805                                                                                                                                           | 0.843991733 | 1           | 0.649048178 | 0.63991802  | 0.425387245 |   |                                                   |
|          | 0.788760816                                                                                                                                           | 1           | 0.680505421 | 0.639627259 | 0.568847011 | 0.623839646 | 1 |                                                   |
|          | 0.486719241                                                                                                                                           | 0.363703654 | 0.318244936 | 0.792407516 | 1           | 0.846811017 |   |                                                   |
|          | 0.695279922                                                                                                                                           | 0.701868008 | 0.941867273 | 0.734990242 | 1           | 0.978067223 |   |                                                   |
|          | 0.685084086                                                                                                                                           | 0.644135431 | 0.743756093 | 0.805568854 | 1           | 0.793424506 |   |                                                   |
|          | 0.707455656                                                                                                                                           | 0.892003526 | 0.873988464 | 0.696521127 | 0.792439695 |             |   |                                                   |
| YBL026W  | YBL026W::LSM2::Like Sm-D1 protein                                                                                                                     |             |             |             |             |             | 1 | 1.078135745 1.461128454                           |
|          | 0.985866644                                                                                                                                           | 1.650113506 | 1           | 0.970316965 | 0.968440772 | 1.388987125 | 1 |                                                   |
|          | 1.020482663                                                                                                                                           | 1.241304767 | 1.165329477 | 1.02390086  | 1           | 0.8230727   |   |                                                   |
|          | 0.627934769                                                                                                                                           | 0.439027294 | 1.009776834 | 1           | 1.609149948 | 1.304756769 |   |                                                   |
|          | 0.988160033                                                                                                                                           | 1           | 0.820816916 | 0.831590616 | 0.449828427 | 0.721041084 |   |                                                   |
|          | 1.002650755                                                                                                                                           | 1           | 0.972878527 | 1.584796542 | 1.203214579 | 1.191817562 |   |                                                   |
|          | 2.252522435                                                                                                                                           | 1           | 1.13830837  | 1.393233867 | 1.333508562 | 1.832080164 |   |                                                   |
|          | 1.544645533                                                                                                                                           | 1.227624805 |             |             |             |             |   |                                                   |
| YBL040C  | YBL040C::ERD2::ER protein retention                                                                                                                   |             |             |             |             |             | 1 | 1.260474428 1.300712756                           |
|          | 1.16138207                                                                                                                                            | 1.552700291 | 1           | 1.159416319 | 1.114831975 | 1.376213853 |   |                                                   |
|          | 1.319379935                                                                                                                                           | 1           | 1.264277391 | 1.283257818 | 1.260378415 | 1.153562729 |   |                                                   |
|          | 0.669184787                                                                                                                                           | 0.457656731 | 0.540104784 | 0.924200916 | 1           | 1.167836963 |   |                                                   |
|          | 1.280745154                                                                                                                                           | 0.986297907 | 1.29270555  | 1           | 1.206957115 | 1.326080835 |   |                                                   |
|          | 1.049042539                                                                                                                                           | 1.009142704 | 0.969522173 | 1           | 1.012998226 | 1.607796295 |   |                                                   |
|          | 1.201937833                                                                                                                                           | 0.972128528 | 1.317652064 | 1           | 1.244529802 | 1.299963087 |   |                                                   |
|          | 1.170343734                                                                                                                                           | 1.322462384 | 1.25656178  | 1.408003427 |             |             |   |                                                   |
| YBL042C  | YBL042C::FUI1::uridine permease                                                                                                                       |             |             |             |             |             | 1 | 1.210621578 0.593614101                           |
|          | 0.925256451                                                                                                                                           | 0.56004556  | 1           | 0.967156894 | 0.808708004 | 0.533528557 |   |                                                   |
|          | 0.822648896                                                                                                                                           | 1           | 0.503538487 | 0.270845694 | 0.225374541 | 0.981694447 | 1 |                                                   |
|          | 0.293446955                                                                                                                                           | 0.440991355 | 0.712582582 | 1           | 0.400529411 | 0.246740941 |   |                                                   |
|          | 1                                                                                                                                                     | 0.750504934 | 0.516236013 | 0.730767849 | 1.487241778 | 0.596784854 | 1 |                                                   |
|          | 0.445686075                                                                                                                                           | 0.368507528 | 0.545993813 | 1.407805771 | 0.63940299  | 1           |   |                                                   |
|          | 0.618407883                                                                                                                                           | 0.711271914 | 1.290509887 | 0.877662378 | 0.413706997 | 0.901892695 |   |                                                   |
| YBL044W  | YBL044W::YBL044W::molecular_function unknown                                                                                                          |             |             |             |             |             | 1 | 1.358261837                                       |
|          | 1.109151369                                                                                                                                           | 1.210445969 | 1.019492947 | 1           | 1.461528891 | 1.440169837 |   |                                                   |
|          | 0.914835785                                                                                                                                           | 1.028286064 | 1           | 1.433326045 | 1.450933976 | 1.496126011 |   |                                                   |
|          | 0.961319811                                                                                                                                           | 1.630614408 | 1.117076071 | 1.301846301 | 1.433061634 | 1           |   |                                                   |
|          | 0.840128063                                                                                                                                           | 0.297627498 | 0.331109963 | 0.653879995 | 1           | 0.899202133 |   |                                                   |
|          | 0.75241964                                                                                                                                            | 1.0028559   | 0.944984007 | 1           | 1.009024787 | 0.861263608 |   |                                                   |
|          | 0.891500545                                                                                                                                           | 0.883919594 | 1           | 0.889382045 | 0.96319819  | 1.065967649 |   |                                                   |
|          | 0.988461793                                                                                                                                           | 1.057753744 |             |             |             |             |   |                                                   |
| YFL011WA | YFL011WA                                                                                                                                              |             |             |             |             |             | 1 | 1.032862391 1.190672867 0.665208423 0.843991929 1 |
|          | 0.771011872                                                                                                                                           | 0.885583804 | 1.107414004 | 1           | 1.040525822 | 1.294951861 |   |                                                   |
|          | 2.262949868                                                                                                                                           | 0.895962203 | 1           | 1.074943702 | 1.314911369 | 1.471155204 | 1 |                                                   |
|          | 1.344472732                                                                                                                                           | 3.269195016 | 2.690952457 | 1.280223608 | 1           | 0.900707264 |   |                                                   |
|          | 1.087450676                                                                                                                                           | 1.063475284 | 0.945398539 | 0.848129217 | 1           | 1.102872662 |   |                                                   |
|          | 1.828297702                                                                                                                                           | 1.527961317 | 1.492651684 | 1.565517003 | 1           | 0.999591354 |   |                                                   |
|          | 1.540079087                                                                                                                                           | 1.332653319 | 1.266948828 | 1.556806752 | 1.366849055 |             |   |                                                   |
| YKL006CA | YKL006CA::SFT1::Required for transport of proteins between an early and a later golgi compartment. possible NSF attachment protein receptor (V-SNARE) |             |             |             |             |             | 1 | 1.232726229 1.555611103 1.800407713 1 1.044742385 |
|          | 0.978903932                                                                                                                                           | 1.653277662 | 1           | 1.116663746 | 1.416636433 | 2.223065186 |   |                                                   |
|          | 1.524833015                                                                                                                                           | 1           | 1.434814271 | 1.733172745 | 1.098239547 | 1.745193805 | 1 |                                                   |
|          | 2.147822355                                                                                                                                           | 3.206477283 | 2.446845527 | 1.443946305 | 1           | 0.9455559   |   |                                                   |
|          | 1.169052599                                                                                                                                           | 0.907812522 | 0.718874414 | 0.946533484 | 1           | 0.87644985  |   |                                                   |

1.587943703 1.13746424 1.11984443 2.035024321 1 1.25506711  
1.878050419 1.070452235 1.765860813 1.513307126 1.549854463  
YLR337C YLR337C::VRP1::Involved in cytoskeletal organization and cellular  
growth 1 1.025682566 0.90177967 0.62649392 1 1.06432381  
1.16362711 0.772275508 1 1.267795516 1.372436347 0.988322701  
0.917213487 1.053570484 1.756954515 0.715962716  
0.760388928 0.837093159 1 1.314067789 1.034242583 1.103618991  
1.074279789 1.131754646 1 0.69823132 0.697725846 0.732280027  
0.780494157 0.460401184 1 0.715520533 1.03156576 0.90844296  
0.667346953 0.83794503 0.682111082  
YMR135WA YMR135WA::YMR135W-A::molecular\_function unknown 1 1.319852864  
1.127601608 1.098692575 0.865866428 1 1.083035852 1.09170963  
0.985197837 1.013258817 1 1.187690152 1.336071826 1.058552472  
1.311759065 1 1.043709031 0.804226592 0.825943792 1  
1.254525551 1.626290757 1.301465629 1 1.171962026 0.968186665  
1.190362219 1.315580719 1.136502248 1 0.884217994 1.026892228  
0.943932263 0.932204262 0.809815422 1 0.958898791 1.006978397  
1.043891299 1.071403052 1.481408481 0.980698884  
YMR169C "YMR169C::ALD3::Expression induced in response to heat shock,  
oxidative and osmotic stress. NAD+ is preferred coenzyme." 1 1.113090763  
1.088633948 2.298736498 1.640589022 1 1.291687746 2.255512239  
1.904579742 2.664227637 1 1.08989849 1.952309944 5.337117062  
2.867623555 1 2.651983328 13.77708632 4.241400361 1  
2.92228713 2.717126382 6.69349302 1 1.149202818 1.437946343  
2.110120442 1.247360601 1.025264439 1 0.940255308 1.155958656  
1.535082714 1.421558201 0.664441757 1 1.085711619 1.351092665  
1.596413562 1.086774128 1.960100297 1.088400659  
YLR354C "YLR354C::TAL1::Transaldolase, enzyme in the pentose phosphate  
pathway" 1 1.055978027 1.017280419 0.98412614 0.992988058 1  
0.966775321 1.024446311 1.030654859 1.095167919 1 0.916324272  
0.988503527 1.001090688 1.015054828 1 1.578514097 1.539486063  
2.090550825 1.992783123 1 1.291540681 0.781285055 1.449680631  
1.802528425 1 1.233789839 1.239060386 1.928438536 1.812270403  
1.526446495 1 1.022616837 1.032907375 1.128006886 1.20563669  
0.704936282 1 1.241531155 0.927741907 1.32559343 1.044585286  
0.98329359 1.592760061  
YLR368W "YLR368W::FLM1::F-box protein, loss of mitochondrial function" 1  
0.739777083 0.824737922 0.898138169 0.899244913 1 0.877791915  
0.924781689 0.967037225 0.849346031 1 0.842011379 0.864953516  
0.636124805 0.99242657 1 1.208134963 0.49730746 0.881308895  
1.522862343 1 1.853595327 2.275002262 1.960779616 2.14765121 1  
1.314711723 1.308024779 1.388818734 1.925595096 1.569716144 1  
0.934620039 0.618916548 0.732453613 1.12671465 0.370127674 1  
0.606524296 0.44556981 0.550357336 0.495988496 0.612185277 0.394906428  
YLR370C YLR370C::ARC18::Arp2/3 complex subunit 1 0.966600648  
1.493584767 0.943483462 1.431201035 1 1.034409099 1.031362974  
1.409188935 1.255159785 1 1.16323979 1.423266739 1.996774343  
1.147055146 1 1.615375742 1.157984472 1.55577192 1.746867388 1  
1.975133647 3.067325641 2.768470742 1.596794091 1 1.222388571  
1.354204272 1.063564504 0.825346941 1.024892112 1 1.015374881  
1.751298521 1.270763894 1.127819467 1.572166802 1 1.128923803  
1.651657887 1.283536304 1.813780952 1.644126559 1.415883994  
YLR372W YLR372W::SUR4::Required for conversion of 24-carbon fatty acids to  
26-carbon species 1 1.985444027 1.262294653 1.634803044 1.439067824 1  
1.723832945 1.411690528 1.379473809 1.744504118 1 1.314080431  
0.777413024 0.683099722 1.399050508 1 0.771696892 0.281823002  
0.39253934 1 0.580142789 0.372565646 0.24872609 0.557963684 1

|                  |                                      |                                           |             |             |             |
|------------------|--------------------------------------|-------------------------------------------|-------------|-------------|-------------|
| 1.19370241       | 0.731371654                          | 0.984355922                               | 1.459981486 | 0.961953202 | 1           |
| 0.759948182      | 0.539434238                          | 0.573484003                               | 0.508341473 | 0.363778253 | 1           |
| 1.12437797       | 0.646117278                          | 0.913714312                               | 0.981210121 | 0.791371338 | 0.717136061 |
| YLR374C          | YLR374C::YLR374C::molecular_function | unknown                                   | 1           | 1.345716471 |             |
| 0.911449695      | 1.30862339                           | 0.446926756                               | 1           | 1.385274043 | 1.535588463 |
| 0.986529579      | 1.114372981                          | 1                                         | 1.463170767 | 1.319784647 | 0.919293807 |
| 1.092262307      | 1                                    | 0.639500101                               | 0.38874213  | 0.785464744 | 0.694877847 |
| 1.034172666      | 1.037204698                          | 0.855158877                               | 0.518122756 |             | 0.92784522  |
| 0.855972937      | 0.771889063                          | 1.472754097                               | 0.87840848  | 1           | 0.814917296 |
| 0.743849647      | 0.763712953                          |                                           | 1           | 0.68767054  | 0.353352401 |
| 0.727656472      | 0.316552748                          |                                           |             |             |             |
| YLR376C          | YLR376C::PSY3::Platinum              | Sensitivity                               | 1           | 0.891552883 |             |
| 1.124558352      | 1                                    | 1.031539531                               | 1.035074478 | 1.767960005 | 1.538398107 |
| 1.008804378      | 1.2065308                            |                                           | 1.575135593 | 1           | 0.505451076 |
| 0.979244362      | 1.212550471                          | 1                                         | 0.876224769 | 1.982444597 | 1.599035109 |
| 0.965606582      | 1                                    | 0.726402537                               |             | 0.667570539 | 0.694252292 |
| 0.858825369      | 1.319407613                          | 1.034774371                               | 1.693960745 | 2.003353352 | 1           |
| 0.806366747      | 0.809930931                          | 1.008253161                               |             | 1.568819117 | 1.500819524 |
| YLR378C          | YLR378C::SEC61::membrane             | component of ER protein translocation     |             |             |             |
| apparatus        | 1                                    | 1.138332101                               | 0.822249884 | 0.76859651  | 0.365807    |
| 0.985457757      | 0.997170664                          | 0.54010843                                | 0.548810356 | 1           | 1.317782013 |
| 0.949685073      | 0.820378149                          | 0.615559486                               | 1           | 1.151326492 | 0.852394824 |
| 1.30960232       | 0.665929751                          | 1                                         | 0.275679709 | 0.209582545 | 0.140457922 |
| 0.244601062      | 1                                    | 0.895388654                               | 0.553809902 | 1.011354905 | 1.250870786 |
| 0.560052308      | 1                                    | 0.671929552                               | 0.422837773 | 0.416388119 | 0.643529714 |
| 0.170866322      | 1                                    | 0.584282365                               | 0.388688531 | 0.559722781 | 0.322053815 |
| 0.464983024      | 0.478090707                          |                                           |             |             |             |
| YLR392C          | YLR392C::YLR392C::molecular_function | unknown                                   | 1           | 0.949352131 |             |
| 1.237564866      | 1.467043502                          | 1.289034232                               | 1           | 1.196358512 | 1.2851423   |
| 1.32791367       | 1.0978172                            | 1                                         | 1.206886564 | 1.623603131 | 1.300549509 |
| 1.30374275       |                                      | 1.16432736                                | 1.27112055  | 1           | 1.181464739 |
| 1.644592718      | 1.604526803                          | 1                                         | 1.087552319 | 1.052972402 | 1.523971365 |
| 1.089443267      | 1.195876759                          | 1                                         | 1.14718548  |             | 1.177935893 |
| 0.785970851      | 1                                    | 1.199143029                               | 1.250619985 | 1.007802983 | 1.011754416 |
| 1.026003901      |                                      |                                           |             |             |             |
| YLR002C          | YLR002C::NOC3::Nucleolar             | Complex 2; involved in the nuclear export |             |             |             |
| of pre-ribosomes | 1                                    | 0.752638119                               | 0.554149796 | 0.671213105 | 1           |
| 0.762367685      | 0.64961494                           | 0.630659181                               | 0.779308699 | 1           | 0.39556653  |
| 0.996439015      | 1                                    | 0.301194701                               | 0.612127902 | 0.22544689  | 0.36940719  |
| 0.438486784      |                                      | 0.405178611                               | 1.137825102 | 1           | 0.806131589 |
| 0.761601071      | 1.017910001                          | 0.910678359                               | 1           | 0.636581283 | 0.475481647 |
| 0.435890446      | 0.834033663                          | 0.732277839                               | 1           | 0.768906598 | 0.794937909 |
| 1.147713881      | 1.101984026                          | 0.543775253                               | 0.874748387 |             |             |
| YLR394W          | YLR394W::CST9::Chromosome            | STability; involved in meiotic chromosome |             |             |             |
| synapsis         | 1                                    | 1.055192152                               | 1.170223194 | 1.022189226 | 1.185743131 |
| 1.161499071      | 1.284084843                          | 0.9320554                                 | 0.875321262 | 1           | 1.143302026 |
| 1.063534534      | 1.108152302                          | 0.878273399                               | 1           | 1.307297048 | 0.739948283 |
| 1.811910873      | 1.124634591                          | 1                                         | 1.024338572 | 1.260467746 | 1.502036492 |
| 1.011710932      | 1                                    | 0.955115263                               | 1.047071121 | 0.903144413 | 0.9567568   |
| 0.885281216      | 1                                    | 1.144626628                               | 1.093864866 | 0.666667797 | 0.777011196 |
| 0.945436236      | 1                                    | 0.792074492                               | 0.979726601 | 0.778755381 | 1.119434029 |
| 0.947163248      | 1.410630213                          |                                           |             |             |             |
| YLR004C          | YLR004C::YLR004C::molecular_function | unknown                                   | 1           | 0.962704882 |             |
| 0.89147005       | 1.12178909                           | 0.94832257                                | 1           | 0.77472144  | 0.817749221 |
| 0.9479223        | 1                                    | 0.817635632                               | 0.848732979 | 0.919123261 | 1.122098004 |
| 1.158882499      |                                      | 1.913808673                               | 1.568731789 |             | 0.296862579 |
| 0.437366664      | 0.494645984                          | 1                                         | 0.93646577  | 1.074878525 | 1.059250263 |

|         |                                                                                                                                      |             |             |             |             |             |             |
|---------|--------------------------------------------------------------------------------------------------------------------------------------|-------------|-------------|-------------|-------------|-------------|-------------|
|         | 0.931530624                                                                                                                          | 1.137388167 | 1           | 0.669419009 | 0.852637561 | 1.09636784  |             |
|         | 1.236953861                                                                                                                          | 1.492728175 | 1           | 0.899377973 | 0.871385334 | 1.166982621 |             |
|         | 0.58127023                                                                                                                           | 1.353512048 |             |             |             |             |             |
| YLR396C | YLR396C::VPS33::vacuolar sorting protein essential for vacuolar morphogenesis and function                                           |             |             |             |             |             |             |
|         |                                                                                                                                      |             |             | 0.965328983 | 0.917887301 | 1.269095699 |             |
|         | 1.075886909                                                                                                                          | 1.192567097 |             | 1.263139274 | 0.853287112 | 0.879708433 |             |
|         | 1.010319615                                                                                                                          | 0.980503644 | 0.821501909 | 0.910459777 | 1           | 1.166304737 |             |
|         | 0.694817683                                                                                                                          | 1.272446152 | 1.150007799 | 1           | 0.908874201 | 1.041913114 |             |
|         | 0.670385648                                                                                                                          | 1.111478479 |             | 0.917573867 | 0.990351453 | 0.864839062 |             |
|         | 1.128152107                                                                                                                          | 1           | 0.76571679  | 0.504877228 | 0.515731718 | 0.985107472 |             |
|         | 0.492498671                                                                                                                          | 1           | 0.48517639  | 0.316324739 | 0.414830967 | 0.289060228 |             |
|         | 0.659327675                                                                                                                          | 0.600678055 |             |             |             |             |             |
| YLR006c | YLR006c::SSK1::Two-component signal transducer that with Sln1p regulates osmosensing MAP kinase cascade(suppressor of sensor kinase) |             |             |             |             |             |             |
|         | 0.93085295                                                                                                                           | 1.047712579 |             | 0.868345527 |             | 1.095708805 | 1.163186555 |
|         | 0.792976622                                                                                                                          | 1.326195229 | 1.453303109 | 1.380076439 | 1.07003503  | 1           |             |
|         | 1.605616443                                                                                                                          | 1.321059713 | 0.924409017 | 1           | 2.028464552 | 1.992552053 |             |
|         | 1.820827131                                                                                                                          | 1.230398208 | 1           | 1.059291724 | 1.104352893 | 1.071726771 |             |
|         | 1.297284635                                                                                                                          | 1.018573189 | 1           | 1.01379124  | 0.600072423 | 0.91018309  |             |
|         | 0.919102661                                                                                                                          | 0.70397049  | 1           | 0.943446374 | 0.713374216 | 0.984417915 |             |
|         | 0.675899235                                                                                                                          | 1.098609135 | 0.678608579 |             |             |             |             |
| YLR020C | YLR020C::YLR020C::molecular_function unknown 1 0.871751649                                                                           |             |             |             |             |             |             |
|         | 0.754649653                                                                                                                          | 1.089978162 | 0.833098263 | 1           | 0.860362872 | 0.798724342 |             |
|         | 0.836421797                                                                                                                          | 0.846981526 | 1           | 0.824153836 | 0.777453679 | 0.562431686 |             |
|         | 1.029443643                                                                                                                          | 1           | 0.856458758 | 0.726123852 | 0.673568651 | 0.69934884  | 1           |
|         | 0.867581202                                                                                                                          | 0.775150762 | 0.585412903 | 0.902100719 | 1           | 1.006289374 |             |
|         | 1.062583612                                                                                                                          | 0.972876619 | 1.071893113 | 0.999100755 | 1           | 1.101917143 |             |
|         | 1.057678211                                                                                                                          | 1.059633603 | 0.992635648 | 1.053215581 | 1           | 1.08894432  |             |
|         | 1.086418998                                                                                                                          | 1.024909516 | 1.11356166  | 0.998501039 | 0.945673958 |             |             |
| YLR022C | YLR022C::YLR022C::molecular_function unknown 0.770785646                                                                             |             |             |             |             |             |             |
|         | 1.007853919                                                                                                                          | 1.135604007 |             | 0.750651366 | 0.722735348 |             |             |
|         | 1.230352782                                                                                                                          | 0.698060923 | 0.78271059  | 0.953549838 | 0.972136049 | 1           |             |
|         | 1.942411716                                                                                                                          | 0.705311443 | 0.97522902  | 1           | 1.513415275 | 1.70555867  |             |
|         | 1.758233171                                                                                                                          | 2.231851081 | 1           | 0.743652008 | 0.908134711 | 0.716055267 |             |
|         | 0.761264762                                                                                                                          | 0.95446217  | 1           | 0.958328246 | 1.014586666 | 0.81496105  |             |
|         | 1.150056739                                                                                                                          | 1.725414104 | 1           | 0.857291217 | 1.051681547 | 0.895813564 |             |
|         | 0.899267162                                                                                                                          | 0.872596248 | 1.28366475  |             |             |             |             |
| YBL046W | YBL046W::YBL046W::molecular_function unknown 1 0.908413356                                                                           |             |             |             |             |             |             |
|         | 1.10667945                                                                                                                           | 1.087733465 | 1.154414524 | 1           | 1.039232873 | 0.957391237 |             |
|         | 0.993784951                                                                                                                          | 1.150883359 | 1           | 1.052106347 | 1.028948078 | 0.912291485 |             |
|         | 1.061402751                                                                                                                          | 1           |             | 0.748770268 | 0.852012609 | 0.69384355  |             |
|         | 0.591537833                                                                                                                          | 0.635973367 | 1           |             | 0.920931298 | 0.82679949  |             |
|         | 0.846924534                                                                                                                          | 0.911031899 |             | 1.230254171 | 1.03934017  | 0.76811161  |             |
|         | 1.267071935                                                                                                                          | 1           | 0.941577631 | 0.819658621 | 0.774410851 | 0.977820563 |             |
|         | 1.130914525                                                                                                                          | 1.016599476 |             |             |             |             |             |
| YLR024C | YLR024C::UBR2::ubiquitin-protein ligase (E3) 1 1.110943244                                                                           |             |             |             |             |             |             |
|         | 1.332020374                                                                                                                          | 1.152755014 | 1.434815389 | 1           | 1.144330005 | 1.248601281 |             |
|         | 1.498611435                                                                                                                          | 1.300408282 | 1           | 1.401549871 | 1.358154113 | 1.373498878 |             |
|         | 1.252864401                                                                                                                          | 1           | 1.420950911 | 0.861375129 | 1.136425969 | 1           |             |
|         | 1.074971655                                                                                                                          | 1.046884962 | 1.116990517 | 0.769921054 | 1           | 1.026486468 |             |
|         | 1.006610322                                                                                                                          | 1.110658241 | 1.024321382 | 1           | 1.153654941 | 1.264269944 |             |
|         | 1.416256915                                                                                                                          | 0.969433649 | 1.352797886 | 1           | 0.865089676 | 1.259772403 |             |
|         | 0.835523452                                                                                                                          | 0.979136442 | 0.652148947 |             |             |             |             |
| YLR024C | YLR024C::UBR2::ubiquitin-protein ligase (E3)                                                                                         |             |             |             |             |             |             |
|         |                                                                                                                                      |             |             |             | 1           | 0.858138334 |             |
|         | 0.846351874                                                                                                                          | 0.894337399 | 1.110859481 | 1           | 1.064659515 | 1.289204316 |             |

1.126372672 1.041230795 1.120011156 1 0.864319841 1.441501359  
1.103284111 0.819034876 0.894862626 1.169833634  
YBL048W YBL048W::YBL048W::molecular\_function unknown 1 1.656738949  
1.651103138 1.574480797 1.732489272 1 1.433334413 1.393895167  
1.686064691 1.664998123 1 1.412630285 1.599714838 2.005045477  
1.46532783 1 1.199710165 0.906587315 0.506412648  
1.109337998  
1.017433767 0.861249297 1.062265328 1.263243972 0.902203178  
1.042691 1.25524978  
YLR026c YLR026c::SED5::Sed5p is a t-SNARE (soluble NSF attachment protein  
receptor) required in ER to Golgi transport. 1 0.659099865 0.742086299  
0.714162528 0.806895866 1 0.685838931 0.718242563 0.82622679 1  
0.659117614 0.715778676 0.821002541 0.876884442 1 0.452716953  
0.481269442 0.510417998 0.989887001 1 0.949565421 1.745092221  
2.224894634 1.491556131 1 0.982180611 0.739297074 0.655008846  
0.942789743 1 1.041592271 1.178669559 1.091018394 1.03516307  
1.192066753 1 1.315564397 1.308136878 1.263453747 0.585881698  
1.326636663 1.084898103  
YBL050W YBL050W::SEC17::peripheral membrane protein required for vesicular  
transport between ER and Golgi<br>similar to alpha-SNAP<br>part of cis-SNARE  
complex<br>required for 'priming' step in homotypic vacuole fusion 1  
1.112634867 1.312612413 1.203997136 1.435206068 1 1.123129948  
0.996701688 1.30781921 1.31066961 1 1.010219233 1.315382139  
1.603874576 1.198916471 1 1.338509279 1.004196462 0.859196605  
1.411734517 1 2.081792401 2.486416713 2.444429151 1.439609918 1  
0.983143571 1.295894598 1.041611396 0.711289905 0.929776061 1  
1.196531568 1.844660842 2.072229357 1.240006913 1.42548069 1  
1.568528094 1.923170336 1.065763043 1.387192234 1.423780692 1.554232579  
YLR028C YLR028C::ADE16::AICAR transformylase/IMP cyclohydrolase 1  
0.689960075 0.754867756 0.849914185 0.351554781 1 0.904888193  
0.893235135 0.679020267 0.713762908 1 0.901079484 1.06669985  
0.834035354 0.876707685 1 1.437338885 1.192428207 1.2838283  
1.172305683 1 1.420231602 0.816574417 1.059413682 1.223679557 1  
1.063557644 1.1185607 1.660138674 1.197845214 1.082500081 1  
1.014257597 0.777286499 1.159197071 1.018218715 0.336658939 1  
1.084799171 0.978972707 1.181449031 0.471378745 0.96253254 0.59104621  
YBL064C YBL064C::YBL064C::molecular\_function unknown 1 1.514924626  
2.198363256 2.146598543 2.520588438 1 1.569889924 1.855267852  
2.557728581 2.641497735 1 2.301765325 3.612427224 2.170190539 1  
1.82911512 2.5612311 2.351881693 6.293274411 1 3.778867942  
6.297445315 10.75565704 6.696112801 1 1.945220246 3.271332202  
2.022026085 0.563699953 0.704917408 1 1.888624739 3.958820024  
2.976599844 1.04961561 1.48666191 1 2.765274621 4.161780549  
1.684066957 0.815420202 2.375086737 4.200368268  
YLR030W YLR030W::YLR030W::molecular\_function unknown 1 1.95910133  
1.347365116 1.591348978 1.276525731 1 1.390648235 1.101320922  
1.291101967 1.349272035 1 1.34506728 1.133573883 1.413732576  
1.397908811 1 0.710415508  
1 0.914889998 0.779189299 1.149027103 0.888276703 0.961793863 1  
0.660027002 0.832972994 0.697144784 0.565433595 1  
0.832390908 0.926703679 0.968440097  
YBL066C YBL066C::SEF1::Suppressor of Essential Function 1 1.163589421  
1.159430993 1.265185071 1.249561387 1 1.22196371 1.267733864  
1.161977601 1.239595939 1 1.233530777 1.354074043 1.500398632  
1.269323767 1 1.028906885 1.142395319 1.127040157 1.039256382 1  
0.898677663 0.769787331 0.726740888 0.775635387 1 1.284608831  
1.292589095 1.369987442 1.703299575 1.563246347 1 0.856431973

|         |                                                                                                  |             |             |             |             |             |             |             |
|---------|--------------------------------------------------------------------------------------------------|-------------|-------------|-------------|-------------|-------------|-------------|-------------|
|         | 0.437660323                                                                                      | 0.878555152 | 1.442268108 | 0.504522529 | 1           | 0.667432012 |             |             |
|         | 0.461272089                                                                                      | 0.864188823 | 0.466846059 | 0.645372106 | 0.605931783 |             |             |             |
| YLR044c | YLR044c::PDC1::pyruvate decarboxylase                                                            |             |             |             |             | 1           | 0.89106314  |             |
|         | 0.600302993                                                                                      | 0.564431385 | 0.455441502 | 1           | 0.844506354 | 0.865678281 |             |             |
|         | 0.451530109                                                                                      | 0.519495685 | 1           | 0.914813946 | 0.760728247 | 0.527240572 |             |             |
|         | 0.488563164                                                                                      | 1           | 0.708676198 | 0.718382179 | 1.275818627 | 0.770524916 | 1           |             |
|         | 0.883574569                                                                                      | 0.512823701 | 0.521356791 | 0.810707932 | 1           | 1.062424732 |             |             |
|         | 0.87855893                                                                                       | 1.305414138 | 1.555185226 | 0.936912424 | 1           | 0.774636363 |             |             |
|         | 0.649599991                                                                                      | 0.72995638  | 0.57911328  | 0.377566598 | 1           | 1.257100853 |             |             |
|         | 0.981429088                                                                                      | 1.515364401 | 0.807740857 | 1.122859783 | 1.117296244 |             |             |             |
| YBL068W | YBL068W::PRS4::ribose-phosphate pyrophosphokinase                                                |             |             |             |             | 4           | 1           |             |
|         | 1.077181477                                                                                      | 0.931591841 | 0.932678604 | 1.115971298 | 1           | 0.912467187 |             |             |
|         | 0.803878664                                                                                      | 0.927067538 | 1.022950206 | 1           | 0.75909132  | 0.601868431 |             |             |
|         | 0.565368655                                                                                      | 1.022376697 | 1           | 0.353937852 | 0.306305434 | 0.261147507 |             |             |
|         | 0.548804858                                                                                      | 1           | 0.692072159 | 0.379723142 | 0.397804513 | 1.035171516 | 1           |             |
|         | 1.098101834                                                                                      | 0.952976271 | 0.942180054 | 1.228642216 | 0.954878036 | 1           |             |             |
|         | 0.92920258                                                                                       | 0.89202177  | 0.803904787 | 0.836569429 | 0.98169358  | 1           |             |             |
|         | 0.867262448                                                                                      | 0.838863556 | 0.8230159   | 1.0046373   | 0.599742006 | 0.988579451 |             |             |
| YBL070C | YBL070C::YBL070C::molecular_function unknown                                                     |             |             |             |             | 1           | 1.140058476 |             |
|         | 0.787983724                                                                                      | 1.106854565 | 1.075780011 | 1           | 1.231187988 | 1.052145412 |             |             |
|         | 0.737940508                                                                                      | 0.966344221 | 1           | 0.792021529 | 0.70436954  | 0.487243601 |             |             |
|         | 0.980849488                                                                                      | 1           | 0.602712004 | 0.402651626 | 0.263629071 | 1           |             |             |
|         | 0.940721328                                                                                      | 0.353277725 | 0.513483027 | 1.218555309 |             |             | 0.963851    |             |
|         | 1.020025537                                                                                      | 1           | 0.879487381 | 0.844178369 |             | 0.871546035 |             |             |
|         | 0.642256092                                                                                      | 1.043101348 |             | 1.104209785 |             | 1.190546106 |             |             |
|         | 0.886131457                                                                                      |             |             |             |             |             |             |             |
| YBL072C | YBL072C::RPS8A::Homology to mammalian S8                                                         |             |             |             |             | 1           | 1.183226759 |             |
|         | 1.165100582                                                                                      | 1.029949445 | 1.24363535  | 1           | 1.095364685 | 1.037488486 |             |             |
|         | 1.170780589                                                                                      | 1.282141541 | 1           | 0.990438717 | 1.129230781 | 1.007919625 |             |             |
|         | 1.065831068                                                                                      | 1           | 0.885630166 | 0.529701099 | 0.434686379 | 0.993674948 | 1           |             |
|         | 1.282560574                                                                                      | 0.679102559 | 0.680317602 | 0.897993642 | 1           | 0.975445769 |             |             |
|         | 0.810114962                                                                                      | 0.813956558 | 0.980452505 | 1.021714184 | 1           | 1.390315323 |             |             |
|         | 1.163925885                                                                                      | 0.941369795 | 0.641710535 | 1.057162867 | 1           | 1.155742665 |             |             |
|         | 0.982332119                                                                                      | 0.884027868 | 1.177987088 | 1.08007411  | 1.213614897 |             |             |             |
| YBL074C | YBL074C::AAR2::splices pre mRNA of the MATa1 cistron                                             |             |             |             |             |             |             |             |
|         | 1.172185251                                                                                      | 0.928136667 | 1.325002946 | 0.897714569 |             | 1.310007717 |             |             |
|         | 1.357600088                                                                                      | 0.832087468 |             | 1.136910998 | 1.194162439 | 0.543383194 |             |             |
|         | 1.174786847                                                                                      | 1.070323378 | 1.406187188 | 0.951100908 |             | 1           |             |             |
|         | 0.926982925                                                                                      | 1.171026963 |             | 0.870782156 |             |             |             |             |
|         | 0.870660392                                                                                      | 1.120497116 |             | 1.149831192 | 0.660845097 | 1.231608337 |             |             |
|         | 1.400342874                                                                                      | 1.008043187 | 1           | 0.769150276 | 0.750109767 | 1.056860432 |             |             |
|         | 0.449524412                                                                                      |             |             |             |             |             |             |             |
| YBL088C | YBL088C::TEL1::Involved in controlling telomere length; ataxia telangiectasia (ATM) gene homolog |             |             |             |             | 1           | 1.505972469 | 1.308224969 |
|         | 1.329670925                                                                                      | 1           | 1.307382153 | 1.171222938 | 1.511335672 | 1.309472399 | 1           |             |
|         | 1.333706643                                                                                      | 1.133931605 | 1.275451688 | 1           | 1.018303962 | 1.038112558 |             |             |
|         | 0.945630448                                                                                      | 1           | 0.868365059 | 1.029341427 |             | 0.426266467 | 1           |             |
|         | 1.174951842                                                                                      | 1.033831802 | 0.929918082 | 1.084974968 | 1.215337689 |             |             |             |
|         | 0.732501205                                                                                      | 0.978488928 |             | 1           | 0.843311544 | 0.823510123 |             |             |
|         | 1.140418482                                                                                      | 0.408111314 |             | 0.686489198 |             |             |             |             |
| YLR398C | YLR398C::SKI2::blocks translation of non-poly(A) mRNAs                                           |             |             |             |             |             | 1           |             |
|         | 1.0478949                                                                                        | 0.943875055 | 1.220586675 | 0.914296926 | 1           | 1.243330666 |             |             |
|         | 1.137951099                                                                                      | 0.958889791 | 0.924236476 | 1           | 0.924917255 | 1.082992059 |             |             |
|         | 0.738209451                                                                                      | 1.06175387  | 1           | 0.933722879 | 0.970736747 | 1.024587208 |             |             |
|         | 0.843389037                                                                                      | 1           | 0.614970635 | 0.367886445 |             | 0.326258013 | 1           |             |
|         | 1.057066971                                                                                      | 1.215039296 | 1.155075266 | 1.887851164 | 1.48454189  | 1           |             |             |

|         |                                                                                               |             |             |             |             |             |             |
|---------|-----------------------------------------------------------------------------------------------|-------------|-------------|-------------|-------------|-------------|-------------|
|         | 0.709967638                                                                                   | 0.323258755 | 0.532744073 | 1.13511934  | 0.268141434 | 1           |             |
|         | 0.51062839                                                                                    | 0.392987364 | 0.47396274  | 0.290865448 | 0.671157945 | 0.383523306 |             |
| YLR400W | YLR400W::YLR400W::molecular_function unknown                                                  |             |             |             |             | 1           | 0.997288415 |
|         | 1.013810099                                                                                   | 0.804797348 | 1.003955662 | 1           | 0.927127381 | 0.8896412   |             |
|         | 1.355212811                                                                                   | 1.319822287 | 1           | 0.753586579 | 0.714608315 | 1.00750825  | 1           |
|         | 0.631228786                                                                                   | 0.552905786 | 0.789481939 | 0.939496031 | 1           | 0.921882082 |             |
|         | 1.262163201                                                                                   | 0.443900298 | 0.388681376 | 1           | 0.738240779 | 0.603736364 |             |
|         | 0.659968887                                                                                   | 0.970177317 | 1           | 0.65707602  | 0.827084611 | 0.578276022 |             |
|         | 0.95616094                                                                                    | 1.475599386 | 1           | 0.75365549  | 1.12798512  | 1.462596468 |             |
|         | 1.623725952                                                                                   | 1.092402802 | 1.020977592 |             |             |             |             |
| YLR402W | YLR402W::YLR402W::molecular_function unknown                                                  |             |             |             |             | 1           | 1.171196892 |
|         | 1.13495175                                                                                    | 0.74020141  | 1           | 1.20062416  | 1.340041397 |             | 1           |
|         | 1.083926237                                                                                   | 0.937629715 | 0.701802094 | 0.97786029  | 1           | 0.536061441 |             |
|         | 0.611502001                                                                                   | 0.841455065 | 0.643096561 | 1           | 0.834046323 |             |             |
|         | 0.800071441                                                                                   | 1           | 1.214937438 | 1.048901818 | 1.356127759 |             | 1           |
|         | 0.755057858                                                                                   |             | 0.883828305 | 0.479539367 | 1           | 0.713937012 |             |
|         | 0.753304977                                                                                   | 0.82341328  | 0.943177558 | 0.739165665 | 0.750409762 |             |             |
| YLR416C | YLR416C::YLR416C::molecular_function unknown                                                  |             |             |             |             | 1           | 0.969610202 |
|         | 1.011676266                                                                                   | 1.310987999 | 0.882773921 | 1           | 1.147843485 | 1.230152013 |             |
|         | 1                                                                                             | 0.904729463 | 0.811957844 | 1.105505471 | 1           | 0.494939386 |             |
|         | 1.252614853                                                                                   | 2.415585233 | 0.904390712 | 1           | 0.434011253 |             |             |
|         | 0.292796993                                                                                   | 1           | 0.870282024 | 0.987806607 | 1.107364463 | 1.332296484 |             |
|         | 1.938521381                                                                                   | 1           | 0.861476476 | 0.625300017 | 1.006776057 | 0.332715806 | 1           |
|         | 0.867780554                                                                                   | 0.547151513 | 1.019331549 | 0.5695012   | 0.64602892  | 0.39665768  |             |
| YLR418C | YLR418C::CDC73::accessory factor associated with RNA polymerase II by affinity chromatography |             |             |             |             |             |             |
|         | 0.829317781                                                                                   | 1           | 0.898837458 | 1.001343751 | 1.036948224 | 0.865859312 | 1           |
|         | 0.803124307                                                                                   | 0.794992077 | 0.728495809 | 0.873631549 | 1           | 0.905221483 |             |
|         | 0.769710463                                                                                   | 0.918648669 | 1.25659706  | 1           | 1.952695446 | 1.457139045 |             |
|         | 1.45037162                                                                                    | 1.6078044   | 1           | 1.04595911  | 1.098175287 | 1.445578033 |             |
|         | 1.188727621                                                                                   | 1.310786755 | 1           | 0.993606571 | 0.827080359 | 0.765850165 |             |
|         | 0.734958433                                                                                   | 0.611735045 | 1           | 0.838332195 | 0.577409443 | 0.742034174 |             |
|         | 0.773544595                                                                                   | 0.607921042 | 1.431645232 |             |             |             |             |
| YLR420W | YLR420W::URA4::Third step in pyrimidine biosynthesis pathway                                  |             |             |             |             |             | 1           |
|         | 0.884047168                                                                                   | 0.860256638 | 0.801990372 | 1           | 0.880341849 | 0.832120466 |             |
|         | 0.864322253                                                                                   | 0.716444191 | 1           | 0.744723592 | 0.701698386 | 0.453165414 |             |
|         | 0.789125881                                                                                   | 1           | 1.364762773 | 0.685795955 | 0.558805899 | 0.887749968 | 1           |
|         | 0.843816235                                                                                   | 0.652208861 | 0.464804552 | 0.76643447  | 1           | 0.879996098 |             |
|         | 1.026723026                                                                                   | 1.038403189 | 1.0511141   | 1.046200348 | 1           | 0.955359196 |             |
|         | 0.730178251                                                                                   | 0.63941977  | 1.018095802 | 1.029320672 | 1           | 0.882026408 |             |
|         | 0.737178697                                                                                   | 0.965830205 | 0.916899024 | 0.814130301 | 1.01309692  |             |             |
| YLR422W | YLR422W::YLR422W::molecular_function unknown                                                  |             |             |             |             | 1           | 1.291625955 |
|         | 1.458469219                                                                                   | 1.498202992 | 1           | 1.313693406 | 1.375580798 |             |             |
|         | 1.183325375                                                                                   | 1           | 1.22281523  | 1.338267267 | 1.356686959 | 1.313002086 |             |
|         |                                                                                               |             |             |             |             | 0.817142899 |             |
|         | 1.375079055                                                                                   | 1.053906297 | 0.659284818 |             | 0.808576987 |             |             |
|         | 0.923709                                                                                      |             | 2.462310155 |             | 1.811154255 | 0.819971044 |             |
|         | 47.283696                                                                                     |             |             |             |             |             |             |
| YLR422W | YLR422W::YLR422W::molecular_function unknown                                                  |             |             |             |             |             |             |
|         |                                                                                               |             |             |             |             | 1           | 0.882999119 |
|         | 0.845640904                                                                                   | 0.829572808 | 0.812036669 | 0.947630705 | 1           | 0.885144867 |             |
|         | 0.707054402                                                                                   | 0.916448361 | 0.947737678 | 0.7595021   | 1           | 1.025800884 |             |
|         | 0.98776163                                                                                    | 1.174125046 |             | 0.872121497 |             |             |             |
| YLR424W | YLR424W::YLR424W::molecular_function unknown                                                  |             |             |             |             | 1           | 0.556518497 |
|         | 0.705047927                                                                                   | 0.689681176 | 0.699414903 | 1           | 0.69046457  | 0.652888952 |             |
|         | 1                                                                                             | 0.587852029 | 0.546710681 | 0.55367226  | 0.686497621 | 1           | 0.845058221 |



|             |                                                                                                                                                                                                                 |             |             |             |             |
|-------------|-----------------------------------------------------------------------------------------------------------------------------------------------------------------------------------------------------------------|-------------|-------------|-------------|-------------|
| 0.88077457  | 1.076061984                                                                                                                                                                                                     | 0.825087734 | 1           | 0.651603747 | 0.577548516 |
| 0.666381882 | 0.870193268                                                                                                                                                                                                     | 1           | 0.869416381 | 0.723466155 | 0.913615533 |
| 0.876747216 | 1.064672468                                                                                                                                                                                                     | 1           | 0.980594571 | 0.826403251 | 1.305898737 |
| 1.166391393 | 0.784850636                                                                                                                                                                                                     | 1           | 0.94353396  | 0.924011786 | 1.241013619 |
| 1.032543933 | 1.065446076                                                                                                                                                                                                     | 0.761792884 |             |             |             |
| YLR046C     | YLR046C::YLR046C::molecular_function                                                                                                                                                                            | unknown     | 1           | 1.42057348  |             |
| 1.082596189 | 0.84060621                                                                                                                                                                                                      | 1.023286169 | 1           | 0.969429497 | 0.937872049 |
| 1.134379128 | 1                                                                                                                                                                                                               | 1.951210217 | 1.264184418 | 1.376789919 | 0.988953945 |
| 1.125914288 | 0.961374277                                                                                                                                                                                                     | 0.923214652 | 0.843236794 | 1           | 0.935712753 |
| 1.704672203 | 1.199558143                                                                                                                                                                                                     | 0.89088199  | 1           | 1.471810786 | 1.718921369 |
| 1.707103099 | 1.149248314                                                                                                                                                                                                     | 0.932263442 | 1           | 1.518153818 | 1.68653125  |
| 1.404668884 | 0.720532253                                                                                                                                                                                                     | 0.779233971 | 1           | 1.262845949 | 1.756778786 |
| 0.904048989 | 1.004458706                                                                                                                                                                                                     | 0.906530481 | 1.96840267  |             |             |
| YLR426W     | YLR426W::YLR426W::molecular_function                                                                                                                                                                            | unknown     | 1           | 0.942337349 |             |
| 1.111402709 | 0.880798664                                                                                                                                                                                                     | 0.789588276 | 1           | 1.048124748 | 1.022723471 |
| 1.224743671 | 1                                                                                                                                                                                                               | 1.078287505 | 0.970641187 | 0.989633311 | 0.851018131 |
| 1.095770052 | 0.921480868                                                                                                                                                                                                     | 1.255850752 | 1.045537879 | 1           | 0.76669444  |
| 0.738382572 | 0.674207853                                                                                                                                                                                                     | 1.113870749 | 0.983908674 | 1.137627123 |             |
| 1.276903966 | 1.107100852                                                                                                                                                                                                     | 1           | 0.794319091 | 0.728947921 | 0.932113327 |
| 0.846702837 | 0.779752214                                                                                                                                                                                                     | 1           | 0.935785281 | 0.769253892 | 1.077128306 |
| 0.801725528 | 0.81518616                                                                                                                                                                                                      | 0.79331536  |             |             |             |
| YLR048w     | YLR048w::RPS0B::Homology to rat Sa; closely related to mammalian p40/laminin receptor precursors (LRPs); required for translation and contributes to the assembly and/or stability of the 40S ribosomal subunit |             | 1           |             |             |
| 1.12859542  | 0.823985813                                                                                                                                                                                                     | 0.682051059 | 0.89255663  | 1           | 0.960474816 |
| 0.888278405 | 0.870359868                                                                                                                                                                                                     | 1           | 0.882108194 | 0.678651042 | 0.545979402 |
| 0.676578127 | 1                                                                                                                                                                                                               | 0.773108662 | 0.420078957 | 0.270793883 | 0.528672888 |
| 0.872413528 | 0.337570781                                                                                                                                                                                                     | 0.27752885  | 0.572770406 | 1           | 1.279465781 |
| 0.911155851 | 1.435190339                                                                                                                                                                                                     | 1.514551548 | 1.339268662 | 1           | 1.135193517 |
| 0.986531387 | 0.65414522                                                                                                                                                                                                      | 0.482421495 | 0.572099543 | 1           | 1.160926137 |
| 0.805630679 | 0.913123664                                                                                                                                                                                                     | 0.843712905 | 0.754285055 | 0.830967177 |             |
| YLR440C     | YLR440C::YLR440C::molecular_function                                                                                                                                                                            | unknown     |             | 0.953016124 |             |
| 1.190064761 | 1.261268711                                                                                                                                                                                                     | 1.122877399 | 1.284582395 | 1.195039681 |             |
| 1.146099065 | 0.95847746                                                                                                                                                                                                      | 1.074640506 | 0.904470071 | 1.080803829 | 1           |
| 0.750609546 | 0.708705431                                                                                                                                                                                                     | 0.825485829 | 0.874927123 | 1           | 0.673294996 |
| 1.153319123 | 1.068558794                                                                                                                                                                                                     | 1.12999092  | 1           | 1.14243912  | 1.052269628 |
| 1.158320043 | 1.076321572                                                                                                                                                                                                     | 1.161507317 | 1           | 0.955838407 | 0.744510221 |
| 1.11345182  | 0.892268695                                                                                                                                                                                                     | 0.571799784 | 1           | 1.025016743 | 0.901564997 |
| 1.014387778 | 0.934206398                                                                                                                                                                                                     | 1.008469436 | 1.073514981 |             |             |
| YLR050C     | YLR050C::YLR050C::molecular_function                                                                                                                                                                            | unknown     | 1           | 1.508800336 |             |
| 1.342477226 | 0.998149443                                                                                                                                                                                                     | 1.881852207 | 1           | 1.115606634 | 1.049683306 |
| 1.766923396 | 1.621764354                                                                                                                                                                                                     | 1           | 1.046534328 | 1.187497721 | 1.779129172 |
| 1.481117623 | 1                                                                                                                                                                                                               | 0.955050624 | 0.904992576 | 0.902849362 | 1.598291916 |
| 1.067480451 | 1.514388855                                                                                                                                                                                                     | 1.368953853 | 1.095822732 | 1           | 1.169878106 |
| 1.143660553 | 1.037410795                                                                                                                                                                                                     | 1.296311207 | 0.900439549 | 1           | 0.889052147 |
| 1.127263924 | 1.291918612                                                                                                                                                                                                     | 2.117468518 | 1.726388136 | 1           | 1.00604446  |
| 1.306099631 | 1.53703127                                                                                                                                                                                                      | 1.723883828 | 1.258367214 | 1.202231775 |             |
| YLR052W     | YLR052W::IES3::Hypothetical ORF                                                                                                                                                                                 |             | 1           | 0.894244583 | 1.038579907 |
| 0.939385284 | 1.307276653                                                                                                                                                                                                     | 1           | 0.865929485 | 0.858429201 | 1.068333034 |
| 0.73567413  | 0.861724849                                                                                                                                                                                                     | 1.024372887 | 1.157959212 | 1           | 0.910945386 |
| 0.851732643 | 0.854499676                                                                                                                                                                                                     | 1           | 1.422906347 | 1.77779775  | 1.449635617 |
| 0.727317146 | 1                                                                                                                                                                                                               | 0.725934282 | 0.947096215 | 0.672401328 | 0.634662138 |
| 0.924243234 | 1                                                                                                                                                                                                               | 0.979325981 | 1.261601313 | 0.869352985 | 1.237849266 |
| 1.704043165 | 1                                                                                                                                                                                                               | 0.909219723 | 1.094657389 | 1.160506137 | 1.301599337 |
| 0.989349979 | 1.000838238                                                                                                                                                                                                     |             |             |             |             |
| YLR054C     | YLR054C::YLR054C::molecular_function                                                                                                                                                                            | unknown     | 1           |             |             |
| 2.2334889   | 1                                                                                                                                                                                                               |             | 1           | 1.511798697 |             |

|             |                                                                        |             |             |             |             |             |   |
|-------------|------------------------------------------------------------------------|-------------|-------------|-------------|-------------|-------------|---|
| 1           |                                                                        |             |             |             |             |             | 1 |
| 0.955644493 | 1.136819789                                                            | 1.258128369 | 1.268769369 | 1.120045707 | 1           |             |   |
| 0.895023825 | 1.164644082                                                            |             | 1           | 1.032167152 | 0.858370619 |             |   |
| 1.093727264 | 0.797800233                                                            | 0.944613719 | 1.12430125  |             |             |             |   |
| YLR068W     | YLR068W::FYV7::Function required for Yeast Viability on toxin exposure |             |             |             |             |             |   |
| 1           | 0.792084005                                                            | 0.982621467 | 0.81041921  | 1.344006586 | 1           |             |   |
| 0.73823242  | 0.716063853                                                            | 1.218757264 | 1           | 0.552499738 | 0.527305424 |             |   |
| 0.957874909 | 1.03055126                                                             | 1           | 0.255947245 | 0.378560035 | 0.744954624 | 1           |   |
| 0.597791189 | 0.574415593                                                            | 0.319246407 | 1           | 0.76397904  |             |             |   |
| 0.60338133  | 0.752041927                                                            | 1.136993769 | 1           | 0.988609269 | 0.90375954  |             |   |
| 3.64032199  | 1                                                                      | 0.889530922 | 0.785978428 | 1.901768028 | 1.310124009 |             |   |
| 1.118171805 |                                                                        |             |             |             |             |             |   |
| YLR070C     | YLR070C::XYL2::XYLitol Dehydrogenase                                   |             |             |             |             |             | 1 |
| 1           |                                                                        | 1           | 1.405320299 | 1.767120171 | 2.477938067 |             |   |
| 1.017840213 | 1                                                                      | 0.513183416 | 0.489529217 | 1.824566881 | 1.339438188 | 1           |   |
| 0.97867134  | 3.120502984                                                            | 2.669789812 | 0.892281568 | 1           | 0.938067779 |             |   |
| 1.077414993 | 1.335560685                                                            | 1.077443682 | 1.02164944  | 1           | 0.675053349 |             |   |
| 0.911259358 |                                                                        | 1           | 0.841483877 | 1.288409791 |             |             |   |
| 1.415731921 | 0.806449707                                                            |             |             |             |             |             |   |
| YLR072W     | YLR072W::YLR072W::molecular_function unknown                           |             |             |             |             |             | 1 |
| 1.301508492 | 1.090802381                                                            | 1.315641444 | 1           | 1.194189472 | 1.0181679   |             |   |
| 1.301517358 | 1                                                                      | 1.221698294 | 1.078948067 | 1.233017593 | 1.162437878 |             |   |
|             |                                                                        |             |             | 1           | 0.903811388 |             |   |
| 0.63489691  | 1.127695221                                                            | 0.879102306 | 1           | 0.676630113 | 0.666736463 |             |   |
| 0.919294201 | 1.272836109                                                            | 0.928716007 | 1           | 0.82089104  | 0.774237768 |             |   |
| 1.101582827 | 0.947399572                                                            | 0.860738375 |             |             |             |             |   |
| YLR074C     | YLR074C::BUD20                                                         |             |             |             |             |             | 1 |
| 1.142655823 | 1                                                                      | 0.770728082 | 1.201118352 | 1.499623108 | 1           |             |   |
| 0.603768414 | 0.491340512                                                            | 0.650483579 | 1.269323681 | 1           | 0.352677956 |             |   |
| 0.253966295 | 0.203847537                                                            | 0.624206791 | 1           | 0.781925276 | 0.917966803 |             |   |
| 0.727019489 | 1.612699269                                                            | 1           | 0.939068395 | 0.754429976 | 0.746761431 |             |   |
| 0.751845217 | 0.865174741                                                            | 1           | 0.933889774 | 0.824901954 | 0.706437924 |             |   |
| 1.283618105 | 1.750260761                                                            | 1           | 0.534401566 | 0.576785497 | 0.817312729 |             |   |
| 1.09845097  | 0.562992713                                                            | 1.311684775 |             |             |             |             |   |
| YLR076C     | YLR076C::YLR076C::molecular_function unknown                           |             |             |             |             |             | 1 |
| 1.528615544 | 0.980790702                                                            | 1.752447337 | 1           | 1.151431316 | 0.822739475 |             |   |
| 1.38426747  | 1                                                                      | 1.135452983 | 1.064511108 | 1.182815659 | 1.088098815 | 1           |   |
| 0.71192813  | 0.403509547                                                            | 0.372420209 | 0.664914473 | 1           | 1.887597756 |             |   |
| 1.585837672 | 1.205965771                                                            | 0.857963277 | 1           | 0.970556053 | 0.930654346 |             |   |
| 0.832264596 | 0.886722541                                                            | 1.078559866 | 1           | 1.077620461 | 1.683973504 |             |   |
| 0.871653293 | 0.64499628                                                             | 1.560518512 | 1           | 1.510452705 | 1.471863702 |             |   |
| 0.979533114 | 2.015538517                                                            | 1.386952104 | 1.383485958 |             |             |             |   |
| YLR442C     | "YLR442C::SIR3::regulator of silencing at HML, HMR, and telomeres"     |             |             |             |             |             |   |
| 1           | 1.355805273                                                            | 1.537772225 | 1.703162016 | 1.515562783 | 1           | 1.559447317 |   |
| 1.507120257 | 1.568879463                                                            | 1           | 1.23366925  | 1.485917259 | 1.310401435 |             |   |
| 1.51864319  |                                                                        |             | 0.385083722 | 0.358563434 |             |             |   |
| 0.477251837 | 1                                                                      | 1.113971097 | 0.863585491 | 0.924208882 | 1.044476449 |             |   |
| 0.978001293 | 1                                                                      | 0.651113353 | 0.707229761 | 0.623598963 | 0.931842791 |             |   |
| 0.808216071 | 1                                                                      | 0.775192148 | 0.961039289 | 1.086889608 | 0.816635012 |             |   |
| 0.855269063 | 0.943922628                                                            |             |             |             |             |             |   |
| YLR444C     | YLR444C::YLR444C::molecular_function unknown                           |             |             |             |             |             | 1 |
| 1.473853934 | 0.889798402                                                            | 1.655910629 | 1           | 1.034895648 | 0.908451546 |             |   |
| 1.469131239 | 1.487192572                                                            | 1           | 1.031991265 | 1.05691292  | 1.450452656 |             |   |
| 1.122035013 | 1                                                                      | 0.51428175  | 0.742192615 | 1.038626961 | 1           |             |   |
| 1.345482617 | 1.930589865                                                            | 2.217040591 | 1.3727901   | 1           | 0.937422372 |             |   |
| 0.988181641 | 0.61563545                                                             | 0.773455876 | 0.851589629 | 1           | 0.813352091 |             |   |

|         |                                                                                                                                                                                                                                 |             |             |             |             |             |             |
|---------|---------------------------------------------------------------------------------------------------------------------------------------------------------------------------------------------------------------------------------|-------------|-------------|-------------|-------------|-------------|-------------|
|         | 1.20721102                                                                                                                                                                                                                      | 0.98867209  | 1.540462502 | 1           | 1.031191265 | 1.257010496 |             |
|         | 1.121494775                                                                                                                                                                                                                     | 0.890509573 |             |             |             |             |             |
| YLR446W | YLR446W::YLR446W::molecular_function unknown                                                                                                                                                                                    |             |             | 1           | 1.495500027 |             |             |
|         | 1.228163197                                                                                                                                                                                                                     | 1.392069794 | 1.014370468 | 1           | 1.371819014 |             | 1           |
|         | 1.188680655                                                                                                                                                                                                                     | 1.336407699 | 0.849429913 | 1.278339921 | 1           | 1.110616571 |             |
|         | 1.590059534                                                                                                                                                                                                                     | 1           |             |             | 1           | 1.023057202 |             |
|         | 0.771603983                                                                                                                                                                                                                     | 1.013960774 | 0.957505507 | 0.994816797 | 1           | 0.963741367 |             |
|         | 1.159437489                                                                                                                                                                                                                     | 1.017626389 | 1.098062815 | 1.4770987   |             | 0.794256925 |             |
|         | 0.627714117                                                                                                                                                                                                                     | 1.038520228 | 0.940308922 | 0.956436804 | 1.054251293 |             |             |
| YLR446W | YLR446W::YLR446W::molecular_function unknown                                                                                                                                                                                    |             |             | 1           | 1.215598362 |             |             |
|         | 1.193934727                                                                                                                                                                                                                     | 1.127433898 | 1.093071803 | 1           | 1.025410795 | 1.086588564 |             |
|         | 1.300234537                                                                                                                                                                                                                     | 1           | 0.960674979 | 1.011375509 | 1.234492457 | 1.095056693 | 1           |
|         | 0.768079788                                                                                                                                                                                                                     | 1.153021021 | 1.099673394 | 0.799697914 | 1           | 1.071472612 |             |
|         | 1.749271584                                                                                                                                                                                                                     | 1.08563448  | 0.643933221 | 1           | 0.719966192 | 0.701362687 |             |
|         | 0.865597255                                                                                                                                                                                                                     | 0.958849726 | 0.718197054 | 1           | 0.840865386 | 1.070498982 |             |
|         | 1.54368941                                                                                                                                                                                                                      | 0.828268202 | 1           | 0.695560348 | 0.853539366 | 0.818208807 |             |
|         | 0.580998608                                                                                                                                                                                                                     | 0.619941796 |             |             |             |             |             |
| YLR448W | YLR448W::RPL6B::Homology to rat and human L6; involved initiation of protein synthesis                                                                                                                                          |             |             | 1           | 1.275502743 | 1.266914686 | 0.978499526 |
|         | 1.10189962                                                                                                                                                                                                                      | 0.970815931 | 1.304439473 | 1.234726914 | 1           | 0.859873333 |             |
|         | 0.789088945                                                                                                                                                                                                                     | 0.76952343  | 0.979875791 | 1           | 0.728252297 | 0.353372292 |             |
|         | 0.251879348                                                                                                                                                                                                                     | 0.743007663 | 1           | 0.934419502 | 0.562056056 | 0.346624524 |             |
|         | 0.607881568                                                                                                                                                                                                                     | 1           | 1.373780957 | 1.436298806 | 0.961727939 | 1.546432852 |             |
|         | 1.506121854                                                                                                                                                                                                                     | 1           | 1.290600945 | 0.738534077 | 0.872397305 | 0.576638074 | 1           |
|         | 1.104942668                                                                                                                                                                                                                     | 0.905177687 | 0.798206756 | 1.096330401 | 0.520271336 | 1.171584964 |             |
| YLR450W | YLR450W::HMG2::Induces cells to assemble peripheral ER membrane arrays and short nuclear-associated membrane stacks.                                                                                                            |             |             | 1           | 1.327711742 |             |             |
|         | 0.967396508                                                                                                                                                                                                                     | 1.45641541  | 1.124652044 | 1           | 1.511239178 | 1.609665026 |             |
|         | 0.779453036                                                                                                                                                                                                                     | 1.095480602 | 1           | 1.605203403 | 1.273796559 | 0.532123337 |             |
|         | 1.126937918                                                                                                                                                                                                                     | 1           | 1.714619374 | 1.557171537 |             | 0.423756779 |             |
|         |                                                                                                                                                                                                                                 | 1           | 0.932045225 | 0.905816143 | 0.939574036 | 1.168144062 |             |
|         | 0.969988801                                                                                                                                                                                                                     | 1           | 1.392591472 | 0.667502008 | 1.008332121 | 0.954384428 |             |
|         | 0.378263814                                                                                                                                                                                                                     | 1           | 0.806114563 | 1.032329915 | 0.98876642  | 0.75229923  |             |
|         | 0.663723006                                                                                                                                                                                                                     |             |             |             |             |             |             |
| YLR464W | YLR464W::YLR464W::molecular_function unknown                                                                                                                                                                                    |             |             | 1           | 0.761504654 |             |             |
|         | 0.5701268                                                                                                                                                                                                                       | 1.008715412 | 0.380851036 | 1           | 1.139790765 | 1.115516711 |             |
|         | 0.424594187                                                                                                                                                                                                                     | 0.448033001 | 1           | 0.823809709 | 0.748457157 | 0.198163551 |             |
|         | 0.732420815                                                                                                                                                                                                                     | 1           | 0.737383469 | 0.461368733 | 0.852968207 | 0.568895558 | 1           |
|         | 0.400004083                                                                                                                                                                                                                     | 0.377960615 | 0.273379215 | 0.41509609  | 1           | 0.989751302 |             |
|         | 0.970043286                                                                                                                                                                                                                     | 0.968185726 | 1.150248172 | 1.056881385 | 1           | 0.987138704 |             |
|         | 0.513464275                                                                                                                                                                                                                     | 0.890494781 | 1.022647718 | 0.380522361 | 1           | 0.725029979 |             |
|         | 0.507663576                                                                                                                                                                                                                     | 0.909917015 |             | 0.788862495 | 0.699623598 |             |             |
| YLR466W | YLR466W::YRF1-4::Y'-helicase protein                                                                                                                                                                                            |             |             | 1           | 1           | 0.889623411 |             |
|         | 0.728532458                                                                                                                                                                                                                     | 1.011716744 | 0.496924926 | 1           | 1.107635984 | 1.079255851 |             |
|         | 0.624915922                                                                                                                                                                                                                     | 0.624785406 | 1           | 0.93964504  | 0.894239422 | 0.358634844 |             |
|         | 0.884167893                                                                                                                                                                                                                     | 1           | 0.712239761 | 0.763120182 | 0.807692688 | 0.631476836 | 1           |
|         | 0.557832181                                                                                                                                                                                                                     | 0.391725306 | 0.341966906 | 0.702241899 | 1           | 0.883649942 |             |
|         | 0.921555476                                                                                                                                                                                                                     | 1.429518438 | 1.053039914 | 1.07275675  | 1           | 0.964387905 |             |
|         | 0.728719293                                                                                                                                                                                                                     | 0.983157407 | 1.393520305 | 0.559832412 | 1           | 0.785250432 |             |
|         | 0.702717068                                                                                                                                                                                                                     | 1.255472142 | 0.834849537 | 0.612151826 | 0.633076143 |             |             |
| YML001W | "YML001W::YPT7::Gtp-binding protein of the rab family; required for homotypic fusion event in vacuole inheritance, for endosome-endosome fusion, and for fusion of endosomes to vacuoles when expressed from high copy plasmid" |             |             | 1           |             |             | 1           |
|         | 1.353901042                                                                                                                                                                                                                     | 1.620524844 | 1.213056076 | 1           | 1.163992923 | 1.257815296 |             |
|         | 1.591319483                                                                                                                                                                                                                     | 1.622871473 | 1           | 0.969455996 | 1.386948592 | 1.683469862 |             |
|         | 1.279397766                                                                                                                                                                                                                     | 1           | 0.907921781 | 0.7809382   | 0.696535834 | 1.536003316 | 1           |
|         | 1.279603966                                                                                                                                                                                                                     | 1.309939999 | 1.43713826  | 1.167665548 | 1           | 1.167872651 |             |

1.322872106 1.061359767 1.00485786 1.01773463 1 1.288009578  
2.060885303 1.80807615 1.158278626 1.659507012 1 1.393255879  
1.619362834 0.976762766 1.888190194 1.667007711 1.269654842  
YML003W YML003W::YML003W::molecular\_function unknown 1.221436684  
1.333948132 0.969179319 1.132431862 1.071757502  
0.717351074 0.915982918 0.983932581 0.742073678 1 1.967097954  
1 0.985513219 1.186973519  
0.965037067 0.950826096 1.011614884 1 1.220494079 0.615168466  
1.133006268 1.089108752 0.58468837 1 1.029056356 0.928796918  
1.055972634 0.866004575 0.99800282 0.758290381  
YLR078c YLR078c::BOS1::necessary for vesicular transport from the ER to the  
Golgi complex 1 0.857856964 0.994435223 0.769681493 1.08584439 1  
0.74118447 0.833623161 1 0.773904065 0.807673139  
0.967219983 0.929443538 1 0.798462736 0.628881587 0.636973311  
1.211912466 1 1.592144598 2.105647348 2.163908684 1.697606054 1  
0.966890629 0.936393266 0.634011423 0.750712534 1.080324247 1  
0.98681952 1.340293556 1.228780361 0.95682679 1.880510951 1  
1.276263911 1.51692105 1.155534052 1.718807853 1.505553826 3.179390781  
YML005W YML005W::YML005W::molecular\_function unknown 1 1.012931225  
1.162722938 1.116685154 1.570507849 1 0.983230462 0.868792337  
1.577657896 1 0.805062689 0.945860593 1.921294992 1.117875171 1  
0.832288352 0.786819056 1.129582001 1.864241521 1 1.341329851  
3.435705401 5.014343543 1.886229096 1 0.944189609 0.791065133  
0.758086574 0.748280092 1.152494491 1 1.005884808 0.92829824  
0.945725924 0.8530473 0.84264206 1 1.038557005 1.072740268  
0.929363692 1.272360576 1.014249345 1.288042866  
YLR092W YLR092W::SUL2::Sulfate uptake 1 1.479892491 1.411888554  
1.15590505 0.631274065 1 1.011133701 1.209548397 0.776074963 1  
2.098404593 2.985205856 0.876602771 0.634904659 1 0.921660657  
0.303603611 0.742304119 0.470100056 1 1.206355829 1.026402858  
1.330474356 0.936531862 1 1.020654165 1.007516407 0.948992188  
1.024657181 0.995605323 1 1.260496316 1.350777722 1.02398629  
0.869135454 1.584487168 1 1.177983864 1.387817824 0.947694274  
1.561585931 1.105446294  
YLR094C YLR094C::GIS3::GIG3 suppressor 1 1.000745202 1.104620601  
0.667968171 0.878007577 1 0.873640838 0.939346872 0.940460889  
0.790824479 1 0.842481153 0.838057257 0.954360543 0.740280922 1  
0.633164997 0.387337481 0.46057613 0.596999777 1 1.092485868  
1.435592345 0.82744242 0.748143709 1 0.781529427 0.710609115  
0.525849816 0.673093458 0.998313592 1 0.892193629 1.120244964  
0.869173577 0.858784258 1.335589183 1 0.837949473 1.205806948  
0.933077257 1.35826755 0.959536717 1.329197238  
YLR096w YLR096w::KIN2::Serine/threonine protein kinase 1 0.796278069  
0.738248366 0.961248657 0.703109633 1 0.958965357 0.978408373  
0.899095253 0.663562407 1 0.830291521 0.836127574 0.534087849  
0.838574267 1 0.610244054 0.79926468 0.536538005 1  
0.876686139 1.050921597 1.098484202 0.650028581 1 0.841571814  
0.761746483 0.756181028 0.927589654 1 0.986260473 0.633075976  
0.589602519 0.654135726 1 0.763194173 0.74961958 0.99285821  
0.805750577 0.663307242 0.836220905  
YLR098c YLR098c::CHA4::Zinc-finger protein with Zn[2]-Cys[6] fungal-type  
binuclear cluster domain 1 0.983852857 0.674686528 1.070528028  
0.582803744 1 1.016232342 1.057140451 0.609478027 0.757244227 1  
0.854867637 0.719530425 0.346575881 0.787893468 1 1.177983015  
1.150670923 1.128722644 0.510543128 1 0.51221739 0.232803721  
1 1.40452044  
0.936291425

YLR098c YLR098c::CHA4::Zinc-finger protein with Zn[2]-Cys[6] fungal-type binuclear cluster domain

1 0.891520253 0.637105702 1.159740725 1.71569524  
0.79835106 1 0.642538131 0.431155821 0.555639895 0.689419198  
0.259017748 1 0.627160767 0.363674822 0.742332289 0.578224614  
0.491720304 0.469334476

YLR100W YLR100W::ERG27::3-keto sterol reductase 1 0.822929522  
0.805295953 0.724115924 0.866209799 1 0.737115442 0.687540085  
0.966814144 0.883979209 1 0.801433312 1.140046463 0.996024896  
0.894483646 1 0.873882093 0.868986478 0.80605751 1.037094001 1  
1.649267652 2.027662093 1.909016809 1.324555377 1 0.881644807  
1.030988362 1.562105338 1.277577998 0.976801301 1 0.868100714  
1.01593441 0.926413015 1.699437696 1.497193279 1 0.947049438  
0.952243058 1.743008532 1.535205931 0.962511835 1.119047469

YLR102C YLR102C::APC9::subunit of the Anaphase Promoting Complex 1  
1.320434968 1.411744463 1.210103319 1.712826433 1 1.280519725  
1.183310627 1.505492549 1 1.231637251 1.786432791 2.272573384  
1.499355718 1 1.582696723 1.727422404 1.348558876 1  
1.70173456 1.956597464 1.578487129 0.740586705 1 1.301922037  
1.581631763 1.288462836 1.028045649 1.251841662 1 1.363884186  
1.495430581 2.186368296 1 1.64694809 1.432251649  
1.652672685 1.156946848 1.646283216 1.45003336

YLR116W YLR116W::MSL5::branchpoint bridging protein -- component of the splicing commitment complex 1 0.767867283 0.762605572 0.698845132  
0.479401617 1 0.948796924 0.971650975 0.677963984 0.662916599 1  
0.908369242 0.889184573 0.759251045 0.716763754 1 0.736283199  
0.505435951 0.778187004 0.706431532 1 0.88593978 0.489344193  
0.148150513 0.636345892 1 0.899535891 0.853189906 1.14954608  
1.139107097 1.078589163 1 0.918000551 0.703103286 0.731300351  
1.041286764 0.52161201 1 0.876130713 0.679539171 1.088517538  
0.807678791 0.841714954

YLR118C YLR118C::YLR118C::molecular\_function unknown 1 1.099916606  
1.09112908 0.919782612 1.361388812 1 0.924597773 1.25388037  
1.330240153 1 0.895130927 1.199156351 1.626426311 1.204507678 1  
1.441636316 1.457513267 1.70159198 1.682073512 1 1.603524698  
1.565164551 2.210891139 1.469721387 1 1.056406435 1.28166393  
1.097186941 0.929728929 0.937828661 1 1.229952973 1.678909665  
1.473765767 1.113708222 1.645436491 1 1.138888105 1.454405176  
1.092417537 1.316209801 1.332117685 1.138311158

YLR120c YLR120c::YPS1::Gpi-anchored aspartic protease (Yapsin 1) 1  
0.897362244 0.91528626 0.921434533 0.648104401 1 0.958812475  
0.854515559 0.733500311 1 1.516801365 1.22046358 0.843087072  
1.050699877 1 1.316852993 1.260575411 0.971632048 0.652933542 1  
0.844586614 0.707401986 0.741188246 1 0.91171055 0.805133519  
1.155070521 0.84721179 0.847931244 1 1.110588857 1.029131876  
1.739857242 1.38957349 0.78811289 1 0.904429027 1.096220631  
1.269773915 0.926348661 1.06232168 0.500856951

YEL070w YEL070w::YEL070W::molecular\_function unknown 1 1.510659283  
1.468996047 1.335746021 1.658650499 1 1.276672615  
1.331563697 1

0.817271316 0.685185666  
0.644459265

YER007w YER007w::PAC2::Required for viability in the absence of the kinesin-related mitotic motor Cin8p; required for normal microtubule stability 1  
0.856498386 0.909945262 0.959644268 0.959606089 1 0.899984676

0.935886014 0.802218029 0.972491722 1 0.773648906 0.908716205  
 0.882071164 0.962221634 1 0.628184508 0.99429495 0.893440537  
 0.910991032 1 0.560180797 0.869789379 0.655097846 0.489677455 1  
 0.978227257 1.08660305 0.877543464 0.900858391 1.268543437  
 0.81509775 0.892080034 1.04752454 1.061341686 0.835782583 1  
 0.934407544 0.905831107 0.915651234 1.356750479 0.902931899 2.51566767  
 YER009w YER009w::NTF2::May coordinate the Ran-dependent (GSP1/GSP2)  
 association and disassociation reactions of nuclear import; human homolog  
 complements yeast mutants 1 1.353747469 1.306031393 0.672061495  
 1.552665853 1 0.934429476 0.942033571 1.08145395 1.063880533 1  
 1.042346359 0.94473768 1.283635181 0.745913226 1 0.958189401  
 0.551888281 0.632137992 0.953636779 1 1.357953059 1.757732904  
 1.510676996 0.923524564 1 1.068695494 1.1059567 0.692471174  
 0.977335346 0.960032736 1 1.039899043 1.791874016 1.077734404  
 0.722207889 1.576224159 1 1.228166761 1.468152186 1.050820981  
 2.01502503 1.102024595 1.511326981  
 YER011w YER011w::TIR1::Cold-shock induced protein of the Srp1p/Tip1p family  
 of serine-alanine-rich proteins. Encodes a stress-response cell wall  
 mannoprotein and this gene is downregulated at acidic pH. 1 2.412734826  
 1.929864702 1.174292621 1.543110019 1 1.567226666 1.432118249  
 1.354173291 1.417632723 1 1.594606099 1.569866006 2.037357336  
 1.3408226 1 0.796506565 0.511149203 0.595214336 1.03412807 1  
 1.219390789 1.867131278 1.050668218 1.120283459 1 1.407752825  
 1.27385676 1.925001363 9.656603797 3.965974596 1 0.719614236  
 0.959068257 1.808725029 6.019355043 6.000547619 1 1.05912845  
 1.206798739 1.138801842 2.905927746 1.196505392 2.697797622  
 YER011w YER011w::TIR1::Cold-shock induced protein of the Srp1p/Tip1p family  
 of serine-alanine-rich proteins. Encodes a stress-response cell wall  
 mannoprotein and this gene is downregulated at acidic pH.  
 0.696169226  
 1 0.752814344  
 0.809138945 0.418363411  
 YML007W YML007W::YAP1::bZip transcription factor required for oxidative  
 stress tolerance and localized to the nucleus in response to the presence of  
 oxidants. 1 0.677196306 0.853117219 1.435250811 0.699613317 1  
 1.031188639 1.164643816 1.238149827 1.067039541 1 0.796119241  
 1.141585395 0.977146302 1.090372636 1 0.466930216 1.289379845  
 1.148416803 0.459095163 1 0.699020072 0.238373018 0.296003495  
 0.419453426 1 1.299780298 1.522799964 1.198120354 1.548580627  
 1.634669981 1 1.062813087 0.800516487 1.021295251 0.914340343  
 0.408534498 1 1.078946607 0.705675291 0.96705815 0.641084948  
 0.730860653 0.448319509  
 YER013w YER013w::PRP22::helicase-like protein 1 1.064921187  
 1.559234166 0.993567932 1 1.320446305 1.097905425 1.324405107  
 1.267644221 1 0.75612254 1.110283322 1.006658819 1.489380756 1  
 0.517309747 1.494311685 1.876448263 0.690668137 1 0.436141421  
 0.906492945 0.522272549 0.246976971 1 1.185259567 1.095843032  
 0.926152862 1.321666099 1.381772755 1 0.969075854 0.739501262  
 0.89545895 1.077542504 0.709651326 1 0.695563318 0.54494437  
 0.664237546 0.652477896 0.791585436 0.558648122  
 YML023C YML023C::YML023C::molecular\_function unknown 1 0.828208532  
 0.634099374 0.801337265 0.681699889 1 0.765992716 0.804285538  
 0.774663834 1 0.775835301 0.593240779 0.516889364 0.705587071 1  
 0.47273927 0.412621473 0.408638985 0.507471633 1 0.979162473  
 0.886956169 1.239523201 1.610043163 1 0.862975403 0.893772027  
 0.964118217 1.027250989 1.086591241 1 0.817976346 0.717988738

|         |                                                                                                                                                                                                                                                 |             |             |             |             |             |             |
|---------|-------------------------------------------------------------------------------------------------------------------------------------------------------------------------------------------------------------------------------------------------|-------------|-------------|-------------|-------------|-------------|-------------|
|         | 0.729145271                                                                                                                                                                                                                                     | 0.701997876 | 0.607837189 | 1           | 0.773802748 | 0.675292072 |             |
|         | 0.755081431                                                                                                                                                                                                                                     | 0.595433677 |             | 0.927285829 |             |             |             |
| YER015w | "YER015w::FAA2::acyl-CoA synthetase (long-chain fatty acid CoA ligase) (fatty acid activator 2), activates endogenous but not imported fatty acids and provides substrates for N-myristoylation"                                                |             |             |             |             | 1           | 0.778553678 |
|         | 0.809238015                                                                                                                                                                                                                                     | 0.88496943  | 0.920515366 | 1           | 1.033237525 | 1.040357557 |             |
|         | 0.889090211                                                                                                                                                                                                                                     | 0.847401984 | 1           | 0.917909684 | 0.975452666 | 0.913816591 |             |
|         | 1.008123855                                                                                                                                                                                                                                     | 1           | 1.469353413 | 1.08679266  | 1.265441268 | 1.10210407  |             |
|         | 1.553461188                                                                                                                                                                                                                                     | 1.077457004 | 0.944733798 | 1.126697905 | 1           | 1.10166192  |             |
|         | 1.105621172                                                                                                                                                                                                                                     | 0.899039242 | 1.056676813 | 1.058898058 | 1           | 1.152482583 |             |
|         | 1.34767468                                                                                                                                                                                                                                      | 1.624583685 | 1.309090967 | 1.159371481 | 1           | 0.926233567 |             |
|         | 0.935723205                                                                                                                                                                                                                                     | 1.095903511 | 1.121529934 | 1.051465038 | 1.071763756 |             |             |
| YML028W | YML028W::TSA1::antioxidant enzyme that provides protection against oxidation systems capable of generating reactive oxygen and sulfur species                                                                                                   |             |             |             |             | 1           |             |
|         | 1.730748057                                                                                                                                                                                                                                     | 1.545823409 | 1.283984667 | 1.676801641 | 1           | 1.316304606 |             |
|         | 1.349614962                                                                                                                                                                                                                                     | 1.58116189  | 1           | 1.778063307 | 2.308407356 | 2.144381354 |             |
|         | 1.059634236                                                                                                                                                                                                                                     | 1           | 1.245798705 | 1.714505082 | 1.816277954 | 1.672937548 |             |
|         | 1.768576488                                                                                                                                                                                                                                     | 2.306487475 | 3.028787878 | 1.349269336 | 1           | 1.762709784 |             |
|         | 1.661954284                                                                                                                                                                                                                                     | 1.78593388  | 0.930626143 | 1           | 1.382815765 | 1.997727119 |             |
|         | 0.743447253                                                                                                                                                                                                                                     | 0.406070595 | 1.012871852 |             | 2.248690173 | 2.007258483 |             |
|         | 1.5223289                                                                                                                                                                                                                                       | 1.160742002 | 1.659941335 | 2.485020964 |             |             |             |
| YER017c | YER017c::AFG3::ATPase family gene                                                                                                                                                                                                               |             |             |             |             | 1           | 0.855756992 |
|         | 0.846103411                                                                                                                                                                                                                                     | 0.74766827  | 1           | 0.967215802 | 1.022423532 | 0.840168707 |             |
|         | 0.884357302                                                                                                                                                                                                                                     | 1           | 0.967852202 | 0.932533772 | 1.001974729 | 0.843246417 |             |
|         | 1.174781748                                                                                                                                                                                                                                     | 0.92191828  | 1.196509647 | 1.079943497 | 1           | 1.232801345 |             |
|         | 1.437099144                                                                                                                                                                                                                                     | 1.070568552 | 0.992913933 | 1           | 1.032846354 | 1.034028118 |             |
|         | 1.204869625                                                                                                                                                                                                                                     | 1.132474551 | 1.037675134 | 1           | 0.95687402  | 0.97541689  |             |
|         | 0.983976083                                                                                                                                                                                                                                     | 0.96729299  | 0.71040615  | 1           | 0.904531251 | 0.881005917 |             |
|         | 0.961635063                                                                                                                                                                                                                                     | 0.915809498 | 0.806043238 |             |             |             |             |
| YML030W | YML030W::YML030W::molecular_function unknown                                                                                                                                                                                                    |             |             |             |             |             | 0.711683897 |
|         | 1.134262719                                                                                                                                                                                                                                     | 0.836373237 | 1.391114953 |             | 0.7772874   | 0.909460306 |             |
|         | 1.199106862                                                                                                                                                                                                                                     | 1.138664931 |             | 0.821035385 | 1.066178753 | 1.424481933 |             |
|         | 1.01619057                                                                                                                                                                                                                                      | 1           | 1.276775163 | 1.424678189 | 1.343246943 | 1.777345982 |             |
|         | 1.143455842                                                                                                                                                                                                                                     | 1.271009996 | 1.432112741 | 0.782636935 | 1           | 0.906481774 |             |
|         | 1.03979646                                                                                                                                                                                                                                      | 0.77877693  | 0.666464245 | 0.836526612 | 1           | 0.885687812 |             |
|         | 1.395269696                                                                                                                                                                                                                                     | 1.216632635 | 0.99716209  | 1.82759014  | 1           | 1.359765621 |             |
|         | 1.27168573                                                                                                                                                                                                                                      | 0.94959747  | 1.840708166 | 1.603304001 | 1.236381036 |             |             |
| YER030w | YER030w::YER030W::molecular_function unknown                                                                                                                                                                                                    |             |             |             |             | 1           | 0.641689202 |
|         | 0.906012852                                                                                                                                                                                                                                     | 0.725675237 | 1.088145741 | 1           | 0.650692816 | 0.712848428 |             |
|         | 1.072460208                                                                                                                                                                                                                                     | 1.075531392 | 1           | 0.699986668 | 0.932788947 | 1.083833237 |             |
|         | 0.821905634                                                                                                                                                                                                                                     | 1           | 0.998999674 | 0.765930156 | 1.123831042 | 1.130537949 |             |
|         | 1.182905136                                                                                                                                                                                                                                     | 1.756840557 | 1.268284187 | 0.850288307 | 1           | 0.910300536 |             |
|         | 1.256800728                                                                                                                                                                                                                                     | 0.821905044 | 0.575932406 | 1.117135428 | 1           | 1.233002123 |             |
|         | 1.474081626                                                                                                                                                                                                                                     | 1.482876507 | 1.577169833 | 1.890883618 | 1           | 1.317520468 |             |
|         | 1.621228308                                                                                                                                                                                                                                     | 1.30413907  | 1.773127204 | 1.396685684 | 1.28629164  |             |             |
| YML032C | "YML032C::RAD52::Required for X-ray damage repair & various types of intra- and interchr. mitotic recombination, including HO switching & plasmid exchange. Disp. for premeiotic DNA synthesis, double strand breaks & heteroduplex formation." |             |             |             |             | 1           | 1.131504933 |
|         | 1.328814626                                                                                                                                                                                                                                     | 1.323195479 |             | 1           | 1.096336257 | 1.349758989 |             |
|         | 1.191044979                                                                                                                                                                                                                                     | 1.180710319 | 1           | 0.808112645 | 0.964463426 | 1.110679165 |             |
|         | 1.104784755                                                                                                                                                                                                                                     | 1.06733582  | 1.341811783 | 0.852154237 | 1           | 0.871769704 |             |
|         | 0.941415789                                                                                                                                                                                                                                     | 0.896427559 | 0.905751059 | 1.065199365 | 1           | 0.76200181  |             |
|         | 0.556868621                                                                                                                                                                                                                                     | 0.794045301 | 0.617513795 | 0.525759878 | 1           | 0.950949063 |             |
|         | 0.812823783                                                                                                                                                                                                                                     | 0.881666253 | 0.828464616 | 0.773180082 | 0.90364392  |             |             |
| YER032w | "YER032w::FIR1::Factor Interacting with REF2, interacts strongly with REF2 protein in 2-hybrid screen"                                                                                                                                          |             |             |             |             | 1           | 0.700500898 |
|         |                                                                                                                                                                                                                                                 |             |             |             | 0.777296338 |             |             |

|             |                                                                                                                                                             |             |             |             |             |
|-------------|-------------------------------------------------------------------------------------------------------------------------------------------------------------|-------------|-------------|-------------|-------------|
| 0.856532319 | 0.958019267                                                                                                                                                 | 1           | 0.938683352 | 0.933088158 | 0.708740069 |
| 0.772903958 | 1                                                                                                                                                           | 0.757664452 | 0.774267558 | 0.535648043 | 0.854364749 |
| 0.592314177 | 0.689843752                                                                                                                                                 | 0.963872755 | 0.468848461 | 1           | 0.687473058 |
| 0.988133934 | 0.425923968                                                                                                                                                 | 0.457239639 | 1           | 0.944270874 |             |
| 1.142188562 | 1.11812395                                                                                                                                                  | 1           | 0.733550385 | 0.842973184 | 0.864463486 |
| 0.938383854 | 0.826156327                                                                                                                                                 | 1           | 0.781397929 | 0.927143641 | 1.137413367 |
| 1.053583247 | 0.904115552                                                                                                                                                 |             |             |             |             |
| YML034W     | YML034W::SRC1::Spliced mRNA and Cell cycle regulated gene 1                                                                                                 |             |             |             |             |
| 0.72095817  | 0.893213165                                                                                                                                                 | 0.998563686 | 0.735908327 | 1           | 0.915766928 |
| 1.000531656 | 0.901348718                                                                                                                                                 | 0.733187121 | 1           | 0.989621663 | 1.008665786 |
| 0.692400246 | 0.792942208                                                                                                                                                 | 1           | 0.519384591 | 0.619301369 | 0.466262091 |
| 1.196590868 | 1.354888872                                                                                                                                                 | 1.31208877  | 1.062079696 | 1           | 0.971159799 |
| 0.860116078 | 1.002509241                                                                                                                                                 | 0.952053133 | 1.060009862 | 1           | 1.322776254 |
| 0.725280661 | 0.998568443                                                                                                                                                 | 0.72121654  | 1           | 1.002723989 | 0.857335913 |
| 1.022144779 | 0.738630512                                                                                                                                                 | 1.047552724 |             |             |             |
| YER034w     | YER034w::YER034W::molecular_function unknown 1 0.964592344                                                                                                  |             |             |             |             |
| 1.088747313 | 0.968519958                                                                                                                                                 | 1.082195821 | 1           | 0.931374522 | 1.057851149 |
| 1           | 0.888506113                                                                                                                                                 | 1.008008661 | 1.118367073 | 1.159307374 | 1           |
| 1.036303438 | 1.163613701                                                                                                                                                 | 1           | 1.109650104 | 1.969512483 | 0.895393533 |
| 1.148857594 | 1                                                                                                                                                           | 1.098989284 | 1.06788022  | 1.014567763 | 1.130313368 |
| 1.114460927 | 1                                                                                                                                                           | 1.097063688 | 1.106956467 | 1.101878537 | 1.078821096 |
| 1.351786983 | 1                                                                                                                                                           | 1.101135487 | 1.206816943 | 1.207253446 | 1.525752183 |
| 1.190143779 | 0.875624                                                                                                                                                    |             |             |             |             |
| YML037C     | YML037C::YML037C::molecular_function unknown 1 1                                                                                                            |             |             |             |             |
| 0.907258171 | 0.787028358                                                                                                                                                 | 1           | 1.041427751 | 1           |             |
| 0.53074203  | 1.206530963                                                                                                                                                 | 1           | 0.458436551 | 0.357234162 |             |
|             | 0.664238876                                                                                                                                                 | 1           | 0.922904653 | 0.841384399 | 0.911197705 |
| 1.015540257 | 0.94514038                                                                                                                                                  | 1           | 1.012345247 | 0.834245678 | 1.048320885 |
| 1.147887094 | 0.704300223                                                                                                                                                 | 1           | 0.79850054  | 0.891815961 | 0.350988359 |
| 0.554270006 |                                                                                                                                                             |             |             |             |             |
| YML054C     | "YML054C::CYB2::Expression is repressed by glucose and anaerobic conditions, is induced by L-lactate and is regulated by GRR1, ROX3, HAP1, HXK2 and CYC8" 1 |             |             |             |             |
| 1.139956152 | 1.312776293                                                                                                                                                 | 1.039608084 | 1.116463112 | 1           | 0.793658707 |
| 1.151431753 | 1.580036072                                                                                                                                                 | 0.78262915  | 1           | 4.094860314 | 2.247103728 |
| 7.97446069  | 3.477166466                                                                                                                                                 | 1           | 3.619375327 | 3.28537468  | 4.873363455 |
| 2.624924675 | 1                                                                                                                                                           | 0.911528202 | 0.944342476 | 0.925831074 | 1.066509452 |
| 0.837611134 | 1                                                                                                                                                           | 0.76621303  | 0.7120503   | 0.760761419 | 0.970376251 |
| 0.81849893  | 0.883557991                                                                                                                                                 | 0.859378005 | 1.299859685 | 0.989780584 | 1.090151884 |
| YML057W     | YML057W::CMP2::calmodulin binding protein homologous to mammalian calcineurin 1                                                                             |             |             |             |             |
| 1.002163676 | 1.0037865                                                                                                                                                   | 0.725276433 | 0.652999031 | 1           | 0.955459605 |
| 1.138909589 | 0.993802591                                                                                                                                                 | 0.768945963 | 1           | 1.471744062 | 0.999684161 |
| 1.681747238 | 0.84213802                                                                                                                                                  | 1           | 1.325866722 | 1.415209991 | 1.092634123 |
| 1.011537751 | 1                                                                                                                                                           | 0.879413804 | 1.005754037 | 1.038918515 | 1.021811591 |
| 0.847127605 | 1                                                                                                                                                           | 1.14247966  | 0.699841295 | 0.903230307 | 0.967859786 |
| 0.808338173 | 1                                                                                                                                                           | 0.806456529 | 0.634645694 | 0.943634176 | 0.867650997 |
| 0.875903255 | 0.90364392                                                                                                                                                  |             |             |             |             |
| YLR122C     | YLR122C::YLR122C::molecular_function unknown 1 1.270143941                                                                                                  |             |             |             |             |
| 1.072663238 | 1.022451708                                                                                                                                                 | 1.089435395 | 1           | 1.238805764 | 1.054269885 |
| 1.004110356 | 1.097441778                                                                                                                                                 | 1           | 1.35464495  | 1.170747756 | 1.283664807 |
| 1.160839935 | 0.744572811                                                                                                                                                 | 0.703708753 | 0.813384917 | 0.793547553 | 1           |
| 0.958339561 | 0.645712789                                                                                                                                                 | 1.084237433 | 1.117294487 |             |             |
| 0.959809688 | 1.195461354                                                                                                                                                 | 1.157815157 | 1           | 0.76447444  | 0.700239705 |
| 0.905188423 | 1                                                                                                                                                           |             | 0.257169194 | 1.873835452 |             |
| YML059C     | YML059C::YML059C::molecular_function unknown 1 0.969220989                                                                                                  |             |             |             |             |
| 0.829504766 | 1.262493119                                                                                                                                                 | 0.809833825 | 1           | 1.184828573 | 1.395688961 |



|             |                                                                                                    |             |             |             |             |             |             |
|-------------|----------------------------------------------------------------------------------------------------|-------------|-------------|-------------|-------------|-------------|-------------|
| 0.718518384 | 0.812025157                                                                                        | 1           | 1.157296811 | 0.918301641 | 0.582710071 |             |             |
| 0.879589838 | 1                                                                                                  | 0.643889268 | 1.046443193 | 1           | 0.643533966 |             |             |
| 0.772668256 | 0.475140706                                                                                        |             |             |             | 0.991854767 |             |             |
|             |                                                                                                    |             | 1           | 0.7569492   |             |             |             |
| 3.952566683 |                                                                                                    |             |             |             |             |             |             |
| YML059C     | YML059C::YML059C::molecular_function unknown                                                       |             |             |             |             |             |             |
|             |                                                                                                    |             |             | 1           | 0.938598485 |             |             |
| 0.85419063  | 1.188018365                                                                                        | 1.212827178 | 0.917324414 | 1           | 0.825641203 |             |             |
| 0.583194312 | 0.715465416                                                                                        | 0.901109972 | 0.370850752 | 1           | 0.684555273 |             |             |
| 0.468376897 | 0.742513259                                                                                        | 0.611991005 | 0.655900567 | 0.747782872 |             |             |             |
| YLR124W     | YLR124W::YLR124W::molecular_function unknown                                                       |             |             |             |             | 1           | 1.418005935 |
| 1.421675704 | 1.368010724                                                                                        | 1           |             |             | 1.193687801 | 1           |             |
| 1.864413995 | 1.379884994                                                                                        | 1.478670661 | 1.53824369  |             | 0.571459645 |             |             |
| 0.926385806 | 0.389209607                                                                                        |             | 0.221191727 |             | 0.356579962 |             |             |
| 0.698451719 | 0.670051914                                                                                        | 0.8506945   | 1.084932004 | 0.826737429 | 1           |             |             |
| 0.790708644 |                                                                                                    | 1           | 1.213699833 |             | 0.059924424 |             |             |
| YLR126C     | YLR126C::YLR126C::molecular_function unknown                                                       |             |             |             |             | 1           | 1.05372982  |
| 1.209421121 | 0.974229846                                                                                        | 1.508735099 | 1           | 1.015932323 | 0.858821274 |             |             |
| 1.280398169 | 1                                                                                                  | 1.172601519 | 1.116988574 | 1.164407709 | 1.299895749 |             |             |
| 0.773424968 | 0.513018415                                                                                        | 0.435741931 | 0.577625562 | 1           | 2.00854388  |             |             |
| 2.003803049 | 1.276437487                                                                                        | 1           | 1.305786232 | 1.244644702 | 0.900266142 |             |             |
| 0.937959275 | 0.974726081                                                                                        | 1           | 1.092990098 | 1.63605561  | 1.325089129 |             |             |
| 0.834412856 | 0.902886101                                                                                        | 1           | 1.359044998 | 1.440779001 | 0.912871986 |             |             |
| 1.303520292 | 1.028607378                                                                                        | 1.082271213 |             |             |             |             |             |
| YLR140W     | YLR140W::YLR140W::molecular_function unknown                                                       |             |             |             |             | 1           |             |
| 1.303159923 | 1.01883731                                                                                         | 1           | 1.243719833 |             | 1.290735903 | 1           |             |
| 1.416555455 | 1.18358369                                                                                         | 1.418148939 | 1.409787673 |             |             |             |             |
| 0.312012731 | 0.550119608                                                                                        | 1           | 1.039986554 | 1.94793255  | 0.361491267 | 1           |             |
| 0.964970705 | 0.990739895                                                                                        | 0.812807994 | 1.102930908 | 1           | 0.72766693  |             |             |
| 0.84016171  | 1.350555141                                                                                        | 1           |             |             |             |             |             |
| 1.221495463 |                                                                                                    |             |             |             |             |             |             |
| YLR142w     | YLR142w::PUT1::proline oxidase                                                                     |             |             |             |             | 0.874213744 | 0.840447656 |
| 0.857618004 | 0.871282396                                                                                        | 0.776076615 | 0.9017716   | 0.942060813 |             |             |             |
| 0.941659748 | 0.829474844                                                                                        | 1.104256579 | 1.259714089 | 1.024022498 |             |             |             |
| 0.594727523 |                                                                                                    |             |             |             | 1           |             |             |
| 0.760256158 | 0.813473603                                                                                        | 1.025732465 | 0.86221306  | 1           | 0.586248148 |             |             |
| 0.786912563 | 2.110534417                                                                                        |             | 0.577782317 |             |             |             |             |
| 0.865116491 |                                                                                                    |             |             |             |             |             |             |
| YLR144C     | YLR144C::ACF2::Identified as an activity necessary for actin polymerization in permeabilized cells |             |             |             |             | 1           | 0.83439323  |
| 0.935206588 | 0.583469944                                                                                        | 1           | 0.982151178 | 1.037701801 | 0.806883265 |             |             |
| 0.703480189 | 1                                                                                                  | 1.105904813 | 0.974260885 | 0.687552944 | 0.811346057 | 1           |             |
| 1.351575839 | 1.148316813                                                                                        | 1.255599737 | 1.025749464 | 1           | 1.295788489 |             |             |
| 1.013593537 | 0.913631289                                                                                        | 0.896876993 | 1           | 1.200527518 | 1.127654715 |             |             |
| 1.21896266  | 0.999788197                                                                                        | 0.813985855 | 1           | 1.096250345 | 0.92869545  |             |             |
| 1.005629621 | 0.71093087                                                                                         | 0.667475466 | 1           | 1.022037611 | 1.06127677  |             |             |
| 1.004063399 | 0.849012708                                                                                        | 0.815205939 |             |             |             |             |             |
| YLR146C     | YLR146C::SPE4::Spermine Synthase                                                                   |             |             |             |             | 1           | 1.097993246 |
| 0.913841508 | 0.920416077                                                                                        | 1           | 0.913474809 | 0.840536183 | 1.223831711 | 1           |             |
| 0.721430635 | 0.562701608                                                                                        | 0.678283917 | 0.910773794 | 1           | 0.441515204 |             |             |
| 0.560761271 | 0.773272827                                                                                        | 0.675016316 | 1           | 0.818976179 | 0.796500928 |             |             |
| 0.461497852 | 0.527809023                                                                                        | 1           | 0.949552724 | 0.838887137 | 0.844343959 |             |             |
| 1.227493573 | 0.888033219                                                                                        | 1           | 0.834106144 | 0.69426338  | 0.553594399 |             |             |
| 0.609944646 | 0.96658018                                                                                         | 1           | 0.897031291 | 0.626504385 | 0.750991416 |             |             |
| 0.935084425 | 0.748813686                                                                                        | 0.950927634 |             |             |             |             |             |

YLR148w YLR148w::PEP3::vacuolar membrane protein 1 0.770289666  
0.682520402 0.907535506 0.725752146 1 0.845980932 0.837676953  
0.794091666 0.610602772 1 0.850125181 0.900549409 0.52858103  
0.98159281 1 0.932669936 0.905530538 0.660998195  
0.805603531 0.739142774 0.700271287 0.845790249 1 0.956330941  
1.184185439 1.051455839 0.94524215 1.003049391 1 1.202670094  
1.111352657 1.270492417 1.337398053 1.15601065 1 1.271889396  
1.335311408 1.107005256 1.037102635 1.382937255 0.985077  
YLR150w YLR150w::STM1::Multicopy suppressor of tom1 and pop2 mutations.  
Genetically interacts with CDC13 to maintain telomere structure. 1  
0.808618453 0.813954063 0.651835404 0.912139485 1 0.858414026  
0.814944791 0.823652562 0.857181078 1 0.730466255 0.709780534  
0.514687225 0.715143171 1 0.765643732 0.437026112 0.336216501  
0.470181952 1 1.395405006 0.772102379 0.538472443 0.993422507 1  
1.161857962 1.307732578 1.060459973 1.134325132 1.054162893 1  
1.176961403 1.46647953 0.715982703 0.679675575 1.141122556 1  
1.061060673 0.921675265 0.931516678 1.075311982 1.229114161 1.126928036  
YKR049C YKR049C::YKR049C::molecular\_function unknown 1 1.036050872  
1.303051459 1.165236634 1.67677843 1 0.980388772 1.512007921  
1.856591235 1.877921677 1 1.337054826 2.137495831 2.231729063 1  
2.06160189 2.273820571 3.779737581 3.945424182 1 3.09966399  
5.55732868 7.866038339 3.877805992 1 1.071486469 1.498739834  
1.377075982 0.895812988 0.844325689 1 1.148300364 2.45395327  
2.508970517 1.896721735 1.755223187 1 1.069098626 1.752729327  
1.184900234 1.169531596 1.140855142 1.635665659  
YER036c YER036c::KRE30::Killer toxin REsistant 1 0.839897311  
0.603058748 0.924726869 0.731800594 1 0.943079144 0.9288027  
0.611599471 0.836438558 1 0.670903012 0.535022121 0.436015078  
0.751272059 1 0.771930187 0.414429159 0.646778654 0.495641875 1  
0.507936156 0.364230221 0.246033331 0.548644344 1 0.870927196  
0.646258324 0.75379313 1.268513372 0.997073704 1 0.828789565  
0.390498231 0.521351456 0.584139912 0.21592808 1 0.785320307  
0.351053781 0.677974727 0.562498824 0.338944618 0.677732966  
YER038c YER038c::KRE29::Killer toxin REsistant 1 0.775954476  
1.058478801 1.035328492 1.538339439 1 0.932079808 1.082767825  
1.570483416 1.461332832 1 0.947964867 1.588847104 2.911426853  
1.02021909 1 1.267035452 1.327364291 1.741240668 1.501308312 1  
1.476693416 6.413440284 5.436005638 0.908504821 1 0.978531923  
1.597141918 0.924782581 0.77955863 1.317041754 1 1.240831574  
1.255767887 2.021732045 1.073803775 1.078228745 1 1.068172571  
0.864879392 1.302742309 1.114510983 2.727568768  
YER040w YER040w::GLN3::Regulates glutamine-repressible gene products 1  
1.000132833 0.986691593 1.189731075 1.021182975 1 1.245682281  
1.186440941 0.959172181 0.99817924 1 1.423698974 1.105336332  
0.746027402 0.941218762 1 0.929156279 0.958473056 1.136139868  
0.547722344 1 0.455855002 0.712186935 0.652409981 0.412502724 1  
1.033681446 1.088955104 1.014878127 0.908723582 1.069768888 1  
1.386856883 1.144435641 1.123496903 1.34088229 0.961694307 1  
1.077312277 1.054457315 1.205338021 1.034239385 0.931641339 1.180341195  
YER053c YER053c::YER053C::inorganic phosphate transporter 1  
1.123316906 1.626063353 1.135387045 1.350547205 1 1.281543226  
1.657208196 1.224357956 1.077011843 1 1.383150602 1.986534474  
3.829708945 0.785812185 1 3.385274294 2.610643408 4.050429017  
2.13003159 1 3.930393594 5.395341927 6.175400399 1.813681788 1  
1.230072872 1.604625821 1.619034941 0.954893216 1.189119113 1  
1.101032344 1.058864018 1.798373386 1.272170553 1.216382592 1  
1.452899044 1.200932492 1.083074018 1.218530066 2.572871573 3.139987634

YML061C YML061C::PIF1::involved in repair and recombination of mitochondrial DNA; also plays a role in (nuclear) chromosomal telomere formation and elongation 1 0.929926746 0.954234664 1.114938203 1.052095151 1  
1.008310886 0.923126058 1 0.794886319 0.809633496  
0.632101486 1.30590364 0.800415773 0.555167467  
0.5820835 0.657512771 0.576180989 1 0.802995425 0.935619939  
0.919655847 1.005622862 1.144068965 1 0.942781817 0.869298951  
0.877162302 1.102146026 0.750890585 1 0.534603801 0.701039932  
0.796545503 0.735996439 0.638774542 0.916778372

YER055c YER055c::HIS1::involved in the first step of histidine biosynthesis 1 0.996866924 0.904190344 0.752029032 0.761962426 1 0.87291164  
0.849178713 0.83982197 0.811180762 1 1.183527917 1.061958966  
0.573570743 0.445520166 1 1.677542256 0.981711039 0.547138085  
0.434018927 1 1.598214635 1.267391182 0.840026716 0.52361754 1  
0.942669418 0.876999057 0.922210422 1.153175608 1.154518557 1  
1.129055257 0.821920154 0.696875601 0.539700464 0.684476522 1  
1.037809984 0.740751909 0.780461403 0.975950401 0.800353555 1.002589463

YML063W YML063W::RPS1B::Homologous to rat ribosomal protein S3A 1  
1.015182092 0.940981393 0.79877859 1.458301399 1 0.931032381  
0.808258463 1.047357764 1.034873101 1 0.69398609 0.726256248  
0.572223365 0.784378823 1 0.912319682 0.482694716 0.231201498  
0.567113596 1 1.271267528 0.725554275 0.439048951 0.777424146 1  
1.057871883 0.974496319 1.032932858 1.056339492 1.244524272 1  
1.406820664 1.354822873 0.986112811 0.667489944 1.138376543 1  
1.389014765 1.217562387 0.915061343 1.766088629 1.347837404 1.06738564

YER056c YER056c::FCY2::purine-cytosine permease 1 0.865847802  
0.521892996 0.884301997 0.587457087 1 0.80846994 0.784423711  
0.664425738 0.837748093 1 0.711816046 0.339512957 0.24328387  
0.61838853 1 0.48383765 0.191203793 0.195879837 0.285284631 1  
0.592715269 0.310200474 0.189662468 0.608844784 1 0.613265019  
0.552435131 0.583154542 1.3372556 1.081730954 1 0.408568507  
0.37363376 0.479069003 0.822451976 0.573357984 1 0.380269737  
0.442609885 0.653884071 0.693850682 0.416444366 0.563901851

YML065W YML065W::ORC1::binds to origins of replication and thereby directs DNA replication and is also involved in transcriptional silencing 1  
0.739564877 0.753700935 0.906044286 0.895530728 1 0.818457047  
0.77211407 0.857925316 1 0.717858332 0.649516857 0.555410128  
0.915271606 1 0.352893883 0.47510961 0.509732414 1  
0.809770908 1.059146049 0.722101947 0.655265695 1 0.893073095  
0.841488015 0.72803313 1.065992885 1 0.887982094 0.693806574  
0.756266946 0.853953063 0.811612082 1 0.85140011 0.964210999  
0.968994251 1.041846103 0.944196082 2.703051194

YER058w YER058w::PET117::Required for assembly of active cytochrome c oxidase 1 0.986791441 1.63480746 1.285793806 1.817949914 1  
1.04495437 1.205026264 1.452857282 1 1.023870849 1.282841921  
1.909805046 1.007529467 1 0.948739499 1.094936388 1.156124754  
1.224021686 1 1.328871669 2.996555075 2.71321474 0.839111966 1  
1.002919168 1.738037413 0.905242164 1.161426423 1 0.949070971  
1.305079063 1.037835952 1.148837208 1.594850713 1 1.36558843  
1.57338834 1.178707939 2.468981278

YML081W YML081W::YML081W::molecular\_function unknown 1 0.738115928  
0.668302651 0.879602062 0.703213461 1 0.955130857 0.807756319  
0.657472409 0.61113934 1 0.741543899 0.60735238 0.322046738  
0.815947881 1.204346532 0.985438259 1.208242466 0.887067829 1  
0.372343193 0.565289697 0.408311317 0.538799417 1 1.013642046  
0.824385026 0.959888146 1.00961552 1 0.848663858 0.616976893

0.710769637 0.743577667 0.41851203 1 0.815482989 0.712510315  
 0.874351515 0.953615147 0.70901449 1.524461433  
 YER060w YER060w::FCY21::identical to FCY2 1 1.009745169 0.752719285  
 0.916961295 0.850136643 1 0.935274531 0.886870437 0.727998918  
 0.885280256 1 0.831839789 0.614968966 0.443098596 0.730783044 1  
 0.731972818 0.501349499 0.560490108 0.595122369 1 0.849926875  
 0.706253762 0.296999608 0.551624239 1 0.782637899 0.834393204  
 0.843957664 1.118668654 0.955078002 0.843354497 0.752122033  
 1.181204431 1.096442616 0.798778488 1 0.690315794 0.723706665  
 0.824134372 0.815386059 0.567305833 0.923783274  
 YML083C YML083C::YML083C::molecular\_function unknown 1  
 1 1 1.28473535 1.90966814  
 1.792201743 1 0.215370898  
 0.25926999 0.216339667 0.924421413 0.985749453 1.083069499  
 1 0.84790981 0.97591812 0.898632974 1  
 0.844892193 0.995720003  
 YER062c YER062c::HOR2::RHR2 (GPP1) encodes another DL-glycerol-3-phosphatase  
 1 1.183775549 1.380691379 1.311084686 1.550889612 1 1.186518332  
 1.369589832 1.646860016 2.022105505 1 1.027830087 1.380684701  
 2.164706227 1.558721458 1 2.162731172 1.698493758 1.667935303  
 1.763764059 1 2.096612074 1.904599093 2.309598574 2.043276002 1  
 1.383304711 1.387003585 1.844385931 1.324594456 1.331370744 1  
 1.157772409 2.055275891 1.690054869 1.51986869 1.387006856 1  
 1.456368967 2.22177471 1.187332598 1.314507902 1.651797227 1.820422293  
 YML087C YML087C::YML087C::molecular\_function unknown 1 1.089750034  
 1.292689776 1.245801879 1.749534438 1 1.415529583 1.371900713  
 1.497066209 1.977447766 1 1.019690104 1.063534567 1.266355519  
 0.50258666 0.674593034 1 2.452717556 3.785050151  
 1.820553913 1 1.153228696 1.244793004 1.05869137 1.241976276  
 1.145767923 1 0.909497786 0.953426511 0.879532022 0.905764086  
 1.100264239 1 1.225713391 1.125448741 1.159871855 1.525643984  
 1.540657998 1.219744238  
 YER076c YER076c::YER076C::molecular\_function unknown 1 0.91997389  
 0.895034028 1.021639336 0.87291066 1 1.03582451 1.012291181  
 1.029670529 1.173570715 1 0.820072853 1.020478773 0.803059734 1  
 1.018225369 1.36815753 1.954489445 0.805874557 1 0.489810432  
 0.922753589 0.439956699 0.419283013 1 0.966030851 1.111648083  
 1.174858207 0.997921309 1 0.799572556 0.951491605 1.110297748  
 0.975907294 0.957158309 1 1.011163981 1.050549594 1.06219699  
 1.18643268 1.140346147 1.036738829  
 YML089C YML089C::YML089C::molecular\_function unknown 1 2.154160679  
 2.231642635 2.061041475 1 2.250738757 2.388754494 1.997285501  
 2.196394294 1 1.236122493 1.970395843  
 0.368580141 0.039980886 1 1.037766544  
 1.046303259 0.970007699 1.061352296 1 1.213788433 1.142545066  
 1.249785722 1.005728009 1.137329484 1 1.137621407 1.109412385  
 1.290679942 1.188720781 0.921156488  
 YML091C YML091C::RPM2::involved in processing of mitochondrial precursor  
 tRNAs and protein import 1 1.043308305 1.07574769 1.13108005  
 1.054810641 1 1.597092374 1.369613488 0.787274207 0.776382211 1  
 1.035443159 0.874107684 0.575761327 0.850010413 1 1.433994064  
 0.715374416 1.333926022 1.102787564 1 1.478082749 0.538804831  
 0.767855341 1.06009865 1 1.029664467 0.903018337 0.774615257  
 1.135733082 1.237227169 1 0.736001221 0.446720411 0.494957161  
 0.67939336 0.676434383 1 0.762189465 0.503373479 0.788931829  
 1.147432622 1.250832393 0.912400256

YML093W YML093W::UTP14::part of small (ribosomal) subunit (SSU) processosome  
(contains U3 snoRNA) 1 0.638089387 0.679844311 0.891760757 0.907265475 1  
0.762700345 0.768808619 0.83389608 1 0.537160747 0.437088504  
0.379080802 0.958018135 1 0.270658622 0.382021648 1  
0.451291331 0.472128211 0.541204029 1 0.689572214 0.60775834  
0.970131873 1.028721396 1 0.704943395 0.610768195 0.549898942  
0.846913355 0.68253455 1 0.487334161 0.574048673 0.823210527  
0.815883019 1.456162701  
YKR051W YKR051W::YKR051W::molecular\_function unknown 1 1.168049891  
0.949690747 1.026143133 0.890605497 1 0.962557087 0.972944286  
0.910647175 0.784830246 1 1.408293764 1.15743792 1.065420437  
0.993162564 1 1.441433536 1.150060311 1.269693612 0.835212941 1  
1.445658685 1.428871537 1.0746349 0.987486106 1 1.059021764  
1.418213676 1.543814909 1.03374392 1.163434064 1 1.228816098  
1.66671113 1.442947707 0.940971711 1.046767051 1 1.329526356  
1.61842382 1.282438003 1.107238621 1.158547195 0.840599021  
YML108W YML108W::YML108W::molecular\_function unknown 1 1.077569951  
1.070863339 0.908285326 1.484505116 1 0.915858286 0.715829823  
1.403198397 1.544323338 1 0.834833956 0.690558841 0.815967509  
1.194008553 1 0.208941224 0.517150527 1.013622722 1  
0.681656637 1.042366189 0.638456563 0.616181729 1 1.070586027  
0.864916639 0.583108796 0.747698031 1.00539249 1 0.759741466  
0.926902368 0.747446055 1.003943956 1.74552156 1 0.838148908  
1.07541313 0.975904231 1.952786973 0.765396614  
YKR053C YKR053C::YSR3::Yeast Sphingolipid Resistance Gene 1  
1.180385614 1.043138499 1.04049743 1.011866358 1 1.096404534  
1.067837755 1.078502262 1.080760391 1 2.122087816 1.317858027  
1.1822913 1.109712986 1 1.85308486 1.295596132 1.107293791  
0.973101945 1 3.182146238 1.740045442 0.907771953 1  
1.627714306 1.674597959 1.068394372 0.944304121 1.12375141 1  
1.746199778 1.698484368 1.91315728 1.426066055 1.215220061 1  
1.67516958 0.996515111 0.884578128 0.738915876 1.141813714  
YKR055W YKR055W::RHO4::ras homolog--GTP binding protein 1 1.779246823  
1.348499328 1.505419544 1.339323238 1 1.326328245 1.375936474  
1.540129622 1 1.623206607 1.462979217 0.998705125 1.714303318 1  
1.596351342 0.57149223 0.798307423 1.104286188 1 1.383042208  
0.917334056 1 1.073449938 0.899259253 0.794684041 1.066520028 1  
0.77760037 0.84596703 0.915904147 0.774799756 1.060391774 1  
0.798995741 0.817388965 0.858103312 0.703350282 0.916693569 1.304679768  
YKR057W YKR057W::RPS21A::Homology to rat S21 1 1.122474985  
1.140637582 0.74783371 1.355130721 1 0.833377318 0.769143394  
1.094424178 0.954929713 1 0.789356257 0.763598541 1.150345934 1  
0.437248418 0.174482085 0.439172622 1 1.512814561 0.8093613  
0.672504211 1.010879868 1 1.279203796 1.191949281 0.882325063  
1.125340809 1.357027514 1 1.042446312 1.495941018 0.878763793  
0.589272773 1.915846031 1 1.011594229 1.273556782 0.915579431  
1.82290937 1.143335609 1.524461433  
YKR059W YKR059W::TIF1::translation initiation factor eIF4A 1  
1.132232378 0.691995482 0.750047231 0.766010298 1 0.897002412  
0.814613571 0.625520759 0.877890202 1 0.928510274 0.625608521  
0.631774829 0.946222962 1 0.544135594 0.402276679 0.244063089  
0.406229846 1 0.628388931 0.294621931 0.215466852 0.652763079 1  
1.104795744 0.955854109 1.033316977 1.321558215 1.205784781 1  
1.065041685 0.795109189 0.639339101 0.487218505 0.509653462 1  
1.414352166 0.87234412 1.015404144 0.90498653 0.881263273 0.779305347  
YKR073C YKR073C::YKR073C::molecular\_function unknown  
1.162088121 1.142939153

1.08910349 1.06514009  
1 1.164468937 0.918317744 0.871046332 1.124022496 1.165541575 1  
0.835081946 1.188109399 0.915849211 0.81189184 1.303526553 1  
0.819870327 0.751527995 0.804297372 0.733772912  
YKR075C YKR075C::YKR075C::molecular\_function unknown 1 0.902609901  
0.96889908 0.866978982 1.172363859 1 0.883084469 0.996122627  
1.094379988 0.929935984 1 0.578852301 0.595392529 0.535260343  
1.019310997 1 0.874262647 1.464483335 1  
1 0.858209973 0.733688351 0.64988332 0.814865102 0.921485591 1  
0.652909568 0.611064222 0.683558645 0.87623475 1 0.607255143  
0.781139814 1.016487614 0.734285086 0.935166396  
YKR077W YKR077W::YKR077W::molecular\_function unknown 1 0.801287829  
0.856776392 0.957943892 0.916041602 1 0.971222612 0.938945653  
0.95430566 1 0.704092205 0.773877562 1.091253518 1.135178293 1  
1.029770851 0.862854845 0.985323349 1.44758151 1 0.917435642  
0.964802899 1.156526767 1.493929819 1 0.960488036 1.260521858  
0.947204692 1.264471368 1 1.233611974 1.108894315 0.910965763  
0.979972044 1.167989854 1 0.926026125 0.945466783 0.896319637  
0.38642172 0.87994814 0.860738375  
YKR079C YKR079C::YKR079C::molecular\_function unknown 1 0.820908617  
0.756965012 0.88286052 0.853816141 1 0.753550863 0.73229982  
0.824660718 0.870990427 1 3.305068001 7.544021613 5.439522009  
2.512203306 1 4.755764254 9.536787073 9.242858787 5.379251596 1  
5.039322141 6.262614535 10.40768855 3.153417761 1 0.802794207  
0.823259209 0.885599287 0.900023681 1.009158814 1 0.761131005  
0.805618492 0.794498535 0.743044309 0.791323898 1 0.840161409  
1.056444456 1.042381776 0.783488122 0.723335462 0.937793286  
YKR081C YKR081C::RPF2 1 0.892349052 0.597208058 0.773932216  
0.969366424 1 0.493716847 0.746622154 0.943360102 1  
0.544870415 0.355717307 0.287372788 0.979749742 1 0.439331553  
0.199789678 0.418721134 1 0.538306713 0.243113321 0.158684115 1  
0.789780052 0.661719703 0.771706207 0.835310449 0.980863717 1  
0.744928698 0.72185712 0.4925882 0.801296278 1.620551146 1  
0.75323606 0.969738108 0.752156352 1.310536502 0.609661183  
YER078c YER078c::YER078C::molecular\_function unknown 1 1.016928424  
1.003682316 1.086695452 1.005697334 1 1.100614609 1.153738631  
0.904580769 0.971810696 1 1.060340381 1.000605851 1.074162298  
0.871863339 1 1.163248195 1.015119686 0.966211271 0.981729842 1  
1.468727322 1.987484025 0.942092001 1.256527604 1 1.173791973  
1.221748761 1.342322654 1.287061525 1 0.938281422 1.262341989  
1.117594555 0.835992118 0.894022137 1 1.037887458 1.233949911  
1.27505764 1.383110867 1.076025639 0.898390244  
YER080w YER080w::YER080W::molecular\_function unknown 1 0.724600493  
0.792680487 0.957830319 0.899653211 1 0.913512141 0.981138725  
0.804524278 0.828628908 1 0.899330028 1.118772319 0.891719591  
1.051524555 1 1.082945892 1.64777963 1.422985687 0.959488106 1  
0.638131439 0.516601619 0.331749917 0.515698453 1 1.039677272  
1.26883577 1.178362731 1.244910534 1.352292453 1 1.217638809  
0.926670034 1.35618211 1.253481613 0.544496073 1 0.894722375  
0.815995357 1.0717711 0.744881651 0.671105292 0.50348379  
YER082c YER082c::UTP7::part of small (ribosomal) subunit (SSU) processosome  
(contains U3 snoRNA) 1 0.732728894 0.687048967 0.839780223 0.823642649 1  
0.766871047 0.705478484 0.824737034 0.928024238 1 0.495625925  
0.467376412 0.473194542 0.86651656 1 0.389020048 0.355786895  
0.453757873 0.561381666 1 0.555807278 1.240272008 0.717741369  
0.553842406 1 0.880665712 0.646343297 0.704409999 0.951059774  
1.122491695 1 0.738335962 0.655323087 0.513734483 0.882428431

0.659254824 1 0.632129945 0.507663553 0.896543473 1.026338747  
 0.611846881 1.67156625  
 YER084w YER084w::YER084W::molecular\_function unknown 1 1.639966412  
 1.763020919 1 1.644759626 2.069076437 1.530699145 1.636715551 1  
 1.406014031 1.585711417 1.908998486 1.610013939 1 0.962437768  
 1.151697351 1.948233897 1 0.607727008 1.528442315 1.017432522  
 1 1.095526846 1.145105853 1.082314159 1.031021887 1  
 1.079288651 1.15399119 0.960291941 0.991957428 1.547831323 1  
 0.819408732 0.784137328 0.588393658 0.659743616 0.657827326 2.807250622  
 YML110C YML110C::COQ5::co-enzyme Q deficient 1 1.103623374  
 1.239059194 1.337230635 1.399472153 1 1.099029944 1.29964944  
 1.465157751 1.392132585 1 0.970422684 1.314646765 1.559239667  
 1.303797739 1 1.378922171 1.328147942 1.713391436 2.017916678 1  
 1.205439112 1.316131039 2.157007066 1.490102336 1 1.305517333  
 1.437639806 1.77264274 1.069794887 1.170956869 1 1.266066295  
 1.635312511 1.574819906 1.101034582 1.160279109 1 1.366823453  
 1.631027429 1.200618571 1.209139557 1.659916313 1.802909829  
 YER086w YER086w::ILV1::threonine deaminase 1 1.103261251 0.776772544  
 0.693271484 0.516481723 1 0.956130086 0.828244806 0.515304379  
 0.572687466 1 1.156696952 0.852056808 0.415892622 0.574023945 1  
 0.859118814 0.493331843 0.497167476 0.483510483 1 0.606829703  
 0.489191437 0.337284043 1 1.12168482 0.74021401 0.962766194  
 1.291370401 0.937855902 1 1.061926047 0.601774188 0.675526088  
 0.656745288 0.342594545 1 0.894312931 0.549471137 0.785036312  
 0.693869513 0.593374034 0.746907259  
 YML112W YML112W::CTK3::CTD kinase-I gamma subunit 1 0.845183816  
 1.125568564 0.94509083 1.326586085 1 0.866490218 0.900843986  
 1.13514065 1.198720441 1 0.908189645 1.028834853 1.273397675  
 1.10465863 1 0.886281672 0.523965794 1.007794207 1.120880026  
 0.398145123 0.797290146 0.643328824 0.426156517 1 1.060246414  
 1.012537835 0.721321241 0.683686146 0.78566969 1 0.997814446  
 1.400953586 1.166470716 1.103786732 1.438840496 1 1.149273515  
 1.378772423 1.259964319 1.180585615 1.187025462 0.965813311  
 YER099c YER099c::PRS2::ribose-phosphate pyrophosphokinase 2 1  
 0.849911905 0.791882248 0.675846281 0.793236193 1 0.5736226  
 0.872180342 0.8462417 1 0.755033679 0.553154907 0.259239695  
 0.9029121 1 0.586405346 0.442934605 0.484202501 0.726994425 1  
 1.097564389 0.750728136 1.118399528 0.995002916 1 0.860600922  
 0.756906072 0.665277208 1.097154434 1.165879333 1 1.053212856  
 0.970356846 0.94823092 1.010927233 1.909312768 1 0.865002516  
 0.705388628 0.795705436 1.189295071 0.868131663 0.992957567  
 YML114C YML114C::TAF8::TBP Associated Factor 65 KDa 1 0.718702262  
 0.791551214 0.927466898 0.798490221 1 0.899185292 0.90938603  
 0.862941392 0.936378991 1 0.753729143 0.84566109 0.802355609  
 0.953395722 1 0.765446736 2.128835013 2.122638876 0.60007901 1  
 0.408130756 0.192599204 0.246888616 1 1.021873037 1.138509724  
 1.156830414 1.606921077 1.258083293 1 0.964656807 0.692801617  
 0.801329344 1.047857882 0.680189623 1 0.651898759 0.557934455  
 0.743531399 0.559333185 0.644545405 0.550767503  
 YER101c YER101c::AST2::Protein involved in targeting of plasma membrane  
 [H+]ATPase 1 1.020350765 1.107239297 1.013747055 1.142588978 1  
 1.018214457 0.932744234 1.217576255 1.143672667 1 1.174673552  
 1.234498525 1.046276153 1.12755154 0.901863787  
 1.109866267 1 1.94174855 1.719486319 2.251364638 1.783314045 1  
 0.932939668 0.855364597 1.300408713 1.001996819 1.073681654 1  
 1.33936247 1.394899929 1.888398313 1.580360902 1.295659521 1  
 1.120634126 0.815205507 1.031647531 0.443683978 1.162724199 0.889634012

YML116W YML116W::ATR1::aminotriazole resistance 1 0.956891417  
0.656119505 0.692557866 0.514829172 1 0.922520221 0.611629094  
0.615390897 1 10.52206009 5.495670145 1.170350029 0.545730083 1  
14.54107795 9.298870301 5.820011829 1.859887492 1 11.1807447  
7.500735285 3.015646354 1.248532324 1 7.518748622 10.92831459  
7.864638051 2.472302789 1.534957789 1.556293349 1.629597798  
1.63264814 1.044714918 0.555061743 1 8.912301847 8.93140824  
5.17775312 1.407490029 1.866578921 2.047208964  
YER103w YER103w::SSA4::member of 70 kDa heat shock protein family 1  
0.790660824 0.789745606 1.157764092 0.613304332 1 1.025023922  
1.231915487 0.846213555 0.933625896 1 0.9021688 1.230482594  
0.387393933 0.61416868 1 2.795257456 7.274766026 2.744614364 1  
1.075924186 0.880660573 1.798220289 1.742361724 1 1.051914416  
0.86453479 1.078141619 0.81178969 0.785461235 1 1.648493117  
1.031891267 0.794449881 0.432915033 0.26749278 1 1.740369418  
1.251148951 0.982123412 0.493917894 1.101593779 0.619066183  
YML118W YML118W::NGL3::DNase/RNase (putative); CCR4 C-terminal homolog;  
displays homology to drosophila Angel gene; homolog to ngl1 and ngl2 1  
1.118787419 1 1.242090092 1.446628242 1.406383603 1  
1.55747885 1.263131113 1.572169764 1 0.829775012  
1.303985443 0.363220111 0.321791668 1  
0.9342421 0.988734348 0.866036986 1 0.727946277  
1.034492532 1.314420603 1.392846267 1.069387467 1 1.04449639  
1.223841137 1.601081351 0.853408602 1.743460178 0.830091564  
YER105c YER105c::NUP157::yeast nuclear pore complex component 1  
0.75542048 0.597504508 0.854969576 0.493319517 1 0.811905484  
0.817062243 0.500618412 1 0.967996433 0.797788053 0.355438472  
0.833644443 1 0.889511612 0.707987192 0.675513677 0.611833132 1  
0.735810642 0.510487548 0.595119433 0.564179223 1 1.046121711  
0.973875266 1.17235421 1.107436952 0.886250006 1 1.091748338  
0.814282501 0.88801785 0.919212668 0.533890166 1  
1.167622247 0.62871158 0.899205372 0.669852347  
YMR001C "YMR001C::CDC5::CDC5 is dispensable for premeiotic DNA synthesis and  
recombination, but required for tripartite synaptonemal complexes,  
haploidization, and spores" 1 0.666374804 0.767180526 0.842121674  
0.746934856 1 0.833952354 0.767376235 0.827401898 0.664936078 1  
0.601386141 0.492676304 0.750655222 1 0.586320069  
0.71249282 0.392597224 1 1.292726426 1.636997061 0.870023115 1  
0.82845634 0.857141925 0.800155552 0.905577275 1 0.644076852  
0.429779023 0.388955529 0.611761253 0.937074293 1 0.811300978  
1.110691514 0.915835632 1.381806614 0.880002116  
YER107c "YER107c::GLE2::Nuclear pore protein required for poly(A)+ RNA  
export, has beta-transducin (WD-40) repeats" 1 0.77883503 0.659871515  
0.804191186 0.653636396 1 0.755667021 0.842751886 1  
0.654335871 0.65004793 0.704484946 0.818017837 1 0.871929849  
1.068033358 0.912754125 1.010703285 1 1.222645652 1.171842134  
1.570489899 1.057536442 1 1.034865904 0.890348167 0.969918814  
0.904972859 0.982711605 1 0.973488261 0.940412143 0.956566409  
0.765912793 0.977383375 1 0.911162838 1.083218148 1.117045337  
0.663191984 0.997231453 1.251266714  
YMR003W YMR003W::YMR003W::molecular\_function unknown 1 0.740014174  
1.130043813 0.805549983 1.447634504 1 0.821701056 0.843567769  
1.237583421 1.28000638 1 0.695330501 0.680883935 0.805566994  
1.125432888 0.398346451 0.310936839 0.545993723 1  
2.480560534 4.510027938 1 0.893236226  
0.878294288 0.8267394 1 0.753128395 0.872295509 0.714805788



0.913433722 1.44178891 1 0.787191623 0.826213787 0.942255142  
 1.081391927 1.439763357 1.322192232  
 YMR005W YMR005W::TAF4::Protein required for protein synthesis 1  
 0.640203218 0.713135702 1.038669121 1 0.863248859 0.659303954  
 0.752329173 1 0.670871624 0.672645256 1.104281267 0.898927724 1  
 0.819265554 0.729379335 1 1.181141712 1.096273495  
 1.807842851 1 0.826008309 0.780421802 0.825953324 1.060245199 1  
 0.891796655 0.905420958 0.865756463 1.003522935 1.385080468 1  
 0.747160456 0.957938403 0.947748538 1.019921159 0.731176144 1.396620305  
 YMR008C YMR008C::PLB1::Responsible for the production of the deacylation  
 products of phosphatidylcholine and phosphatidylethanolamine but not  
 phosphatidylinositol 1 0.710836699 0.603867705 0.899139854 0.494302726 1  
 1.021067963 0.532331492 0.429780649 1 1.144042289 1.107050848  
 0.389831526 0.828579309 1 0.800308076 1.032834534 0.88054972  
 0.639407313 1 0.413366493 0.395401701 0.270506129 0.623931255 1  
 0.921993833 0.753481272 1.185325623 1.281093427 0.870948285 1  
 0.990350575 0.945678206 1.184264141 2.061926115 0.809429825 1  
 0.963150313 1.080037669 1.570595118 0.875680058 0.982714429 0.682111082  
 YKR083C YKR083C::DAD2::Duo1 And Dam1 interacting; Helper of AsK1  
 0.725228027 0.929275471 1.183573513 0.70222222 0.694177456  
 1.097777008 0.702883461 0.778479714 1.105463413 1.050455152 1  
 0.895879948 0.731350853 1 2.450400706 1.880272173  
 1.108465758 1 0.701279593 0.710824362 0.45915796 0.47109048  
 0.847357522 1 0.938892261 1.240035597 0.986112811 1.418418794  
 2.443873921 1 0.923762821 1.482967487 1.29832806 1.27461344  
 1.58747083 1.281037964  
 YMR010W YMR010W::YMR010W::molecular\_function unknown 1 0.957281688  
 0.838332177 0.916378123 0.946897062 1 0.893121099 0.924555182  
 0.820246882 0.85236742 1 0.965013053 0.785914781 0.717157166  
 0.803080986 1 0.833992583 0.638650522 0.666967448 0.8060905 1  
 0.702201645 0.655136753 0.636934307 0.782942735 1 0.723618552  
 0.831494479 0.781883977 0.998387857 0.697180156 1 0.852630529  
 0.838059815 0.828881645 0.726843257 0.615966575 1 1.170949825  
 1.036766868 1.103610361 0.964700489 1.434588338 0.797693476  
 YKR097W YKR097W::PCK1::phosphoenolpyruvate carboxylkinase 1  
 1.164567057 0.968613512 1.010069463 0.963003249 1 1.060296696  
 1.064597274 0.98131289 1 1.024057839 1.001616387 1.203497712 1  
 0.751484337 1.308539698 1.237918237 0.926800518 1 0.707875709  
 0.744965954 0.612347684 0.484387508 1 1.024257428 0.988731559  
 0.984692663 1.214808227 1.030713577 1 0.794421658 0.945072444  
 0.703177478 0.797096641 0.861258622 1 0.669912442 0.827918123  
 0.653251402 0.71719643 0.640939774 0.920280823  
 YKR099W YKR099W::BAS1::Transcription factor regulating basal and induced  
 activity of histidine and adenine biosynthesis genes 1 0.642534614  
 0.620118879 0.765148686 1 0.603389069 0.509588361  
 0.783255041 1 0.62726034 0.324389616 0.412326451 0.933668946  
 1 0.935004034  
 0.931995826 1.120714145 1.427508097 1.355819981 1 0.814297837  
 0.666075351 0.687985698 1.250809805 0.78247683 1 0.529872458  
 0.597972245 0.837554984 0.599374106 0.652449646 0.48159321  
 YKR101W YKR101W::SIR1::repressor of silent mating loci 1 0.646080026  
 0.881865843 1.027254818 1.130460028 1 0.822633752 1.107817267  
 1 0.944549506 0.867074489 1.454420182 0.782095266  
 0.201762646 1 1.016905888  
 0.88744231 1.138928264 0.919720628 1.304731917 1 1.06141784  
 1.15360383 1.313066349 1.157836419 1.157519395 1 0.980832314  
 0.80909395 0.871109297 0.664593202 0.791278574 2.789738159

YKR103W YKR103W::YKR103W::not yet annotated 1 1.18672139 0.890007338  
1.135106431 0.889309666 1 1.008392572 1.426989032 0.931412977  
0.813589908 1 1.039360158 0.925692618 0.732016966 1.327090036  
1 0.7976449  
0.890835197 0.843462959 0.69352631 0.867098219 1 1.144987008  
1.053557549 1.543843791 1.244012084 0.97018127 1 1.014031641  
1.246307844 0.990442607 0.596008231 0.866691714 1.210988006  
YKR105C YKR105C::YKR105C::not yet annotated 1 0.878275429 0.744536027  
1.026050909 1 0.89626352 0.727293108 0.924125266 1  
0.932855047 0.749549871 0.652049517 0.471873039  
1 0.776858738 0.753211031 0.745835698  
0.84462574 1.045579781 1 0.777094463 1.156782348 1.503484335  
1.33121162 0.973733474 0.828345173 1.004342587 0.971787993  
1.062086626 0.995258953 0.624319912  
YLL001w YLL001w::DNM1::Involved in receptor-mediated endocytosis and  
mitochondrial organization. Required for the cortical distribution of the  
mitochondrial network. 1 0.968976478 1.122607763 0.924678866 1  
1.365219255 1.409549119 0.847670158 0.747083546 1 1.569935268  
1.40527083 0.51163366 0.893289407 1 1.237304287 0.954249034  
0.713448486 1 1 0.973688669 0.853584074  
0.827195446 1.219407703 1.146835121 1 1.238544736 0.832174443  
0.902434831 0.971291797 1.314749869 1 0.945663783 0.670429486  
1.011071339 0.985864501 0.391403925  
YLL015W YLL015W::BPT1::bile pigment transporter 1.074913583  
0.797172586 0.735205706 1.221624484 0.860033098  
0.783064468 1.095919463 0.972041954 0.830850456 0.958430204  
1.018203287 1.10065184 0.994341163 1  
0.993899627 0.80155741 0.929874748 0.90526954 0.940785493 1  
0.973585806 0.939696695 0.852823764 0.837961108 1.054951306 1  
0.945998726 1.285996287 0.991920477 0.567533007 1.214155251  
YLL017W YLL017W::SDC25::molecular\_function\_unknown\* 1.020736918  
0.938386033 0.843082093 0.971137232 0.860827639 0.885295886  
1.08538676 1.11279831 0.756267627 1.263219811 0.978989 1  
1.204151314 1.751253585 0.238082343 1  
1.053301658 1.003439898 0.94195358 0.892095681 0.986544732 1  
1.066311373 0.645404789 1.224662599  
1.225873579  
YLL019c YLL019c::KNS1::protein kinase homolog 1 0.814080362  
0.854538486 0.760710918 1 0.797459242 0.891963658  
0.672506103 1 0.93784535 1.099691167 1.593937769 1.069261414 1  
1.328157423 1.53873438 0.979851756 1 0.758620367 0.977904696  
0.797968021 0.606287914 1 0.932123345 1.208346448 1.376322631  
1.063664727 0.704336356 1 1.09826743 1.174554431 2.169780343  
1.47086134 0.831293416 1 1.026593086 1.123078628 1.272056193  
0.878194565 1.284921999 0.669852347  
YER109c "YER109c::FLO8::Nuclear protein required for diploid filamentous  
growth, haploid invasive growth and flocculation; note that S288C strains have a  
mutation in this gene" 1 0.761704806 0.830825521 0.85104546 0.740102773 1  
0.802706892 0.92316435 0.819353833 1 0.946437594 0.958480755  
0.786718959 0.91470557 1 0.94443606 0.882435742 0.823341537  
0.85944855 1 1.249489536 1.489565019 1.344578907 1  
0.832745645 0.840630151 0.926773395 0.831622537 1.09527506 1  
0.962609295 0.868660293 0.886934806 0.821740468 0.717715528 1  
1.024386392 1.292499392 1.271422967 0.302207975 1.025640385 0.954430189  
YER123w YER123w::YCK3::plasma membrane-bound casein kinase I homolog 1  
0.861048914 0.841866807 1.052495038 0.926089416 1 0.942432046  
0.896268671 0.801020624 0.861609459 1 0.908253146 0.773630235

|             |                                                                                                       |             |             |             |             |            |
|-------------|-------------------------------------------------------------------------------------------------------|-------------|-------------|-------------|-------------|------------|
| 0.698224136 | 0.849443808                                                                                           | 1           | 0.93224616  | 0.610520372 | 1.010367458 |            |
| 0.623527199 | 1                                                                                                     | 0.506123382 | 0.616577182 | 0.414524141 | 0.325079399 | 1          |
| 0.797872364 | 0.770543083                                                                                           | 0.723266459 | 0.923891827 | 0.744565345 | 1           |            |
| 1.022384266 | 0.86097936                                                                                            | 0.739844397 | 0.793628842 | 0.814368838 | 1           |            |
| 1.471022788 | 1.183970891                                                                                           | 1.361211033 | 1.243364969 | 1.603451637 | 0.62957364  |            |
| YER125w     | YER125w::RSP5::involved in ubiquitin-mediated protein degradation 1                                   |             |             |             |             |            |
| 1.09216411  | 0.877478972                                                                                           | 1.57144641  | 0.804002679 | 1           | 1.380189005 |            |
| 1.415716326 | 0.794906422                                                                                           | 0.805198342 | 1           | 1.205842678 | 1.097507102 |            |
| 0.793441305 | 0.979160073                                                                                           | 1           | 1.122220845 | 0.680789683 | 1.14596669  |            |
| 0.460968513 | 1                                                                                                     | 0.359310953 |             | 1           | 0.689249582 |            |
| 0.565677576 | 0.864860733                                                                                           | 1.213927177 | 0.464935695 | 1           | 0.740219038 |            |
| 0.502827256 | 0.711943546                                                                                           | 0.678261573 | 0.278386602 | 1           | 1.020958365 |            |
| 0.713642986 | 0.880241485                                                                                           | 0.719696345 | 0.808190038 | 0.375642687 |             |            |
| YER127w     | YER127w::LCP5::Lethal with conditional pap1 allele 1                                                  |             |             |             |             |            |
| 0.501095055 | 0.604686682                                                                                           | 0.700961249 | 0.85248921  | 1           | 0.544157762 |            |
| 0.544836696 | 0.905970938                                                                                           | 1.082343187 | 1           | 0.336189057 | 0.30146522  |            |
| 0.367485591 | 0.794823195                                                                                           | 1           | 0.244917172 | 0.29519997  | 0.693499722 | 1          |
| 0.59718342  | 0.934230651                                                                                           | 0.801990333 | 0.871355848 | 1           | 0.558599619 |            |
| 0.469749895 | 0.456472973                                                                                           | 0.563210147 | 0.796021546 | 1           | 0.644722027 |            |
| 0.893113425 | 0.605727477                                                                                           | 1.441778148 | 2.463782663 | 1           | 0.439444239 |            |
| 0.64221753  | 0.838762268                                                                                           | 1.211391078 | 0.735236459 | 0.898390244 |             |            |
| YMR012W     | YMR012W::CLU1::CLU1 is similar to the Dictyostelium cluA gene 1                                       |             |             |             |             |            |
| 1.42458211  | 1.240668757                                                                                           | 1.644017578 | 1.322601771 | 1           | 1.372953673 |            |
| 1.627587658 | 1.211152224                                                                                           | 1.196690917 | 1           | 1.133247611 | 1.219203366 |            |
| 1.014430907 | 1.456298679                                                                                           |             | 0.980043923 |             | 1           |            |
|             | 1                                                                                                     | 0.855238474 | 0.684076845 | 0.663143534 | 1.03709979  |            |
| 0.883311739 | 1                                                                                                     | 1.037490024 | 0.580905328 | 0.265554184 | 0.36104705  |            |
| 0.407294701 | 1                                                                                                     | 0.869535625 | 0.60773538  | 0.782845575 | 0.81860678  |            |
| 0.783477965 | 0.578787476                                                                                           |             |             |             |             |            |
| YER129w     | YER129w::PAK1::high copy suppressor of temperature sensitive cdc17 (DNA polymerase alpha) mutations 1 |             |             |             |             |            |
| 0.811806108 | 1                                                                                                     | 0.760628368 | 0.728143588 | 0.654853966 | 0.614325704 | 1          |
| 0.974106044 | 0.799568551                                                                                           | 0.537018714 | 0.813366062 | 1           | 0.432973146 |            |
| 0.554481516 | 0.444292658                                                                                           |             | 0.938185726 | 0.666348114 | 1           |            |
| 0.828695104 | 0.942360984                                                                                           | 0.816231137 | 1.02112412  | 1.036681385 | 1           |            |
| 0.971137627 | 0.708376351                                                                                           | 0.83240698  | 0.853171806 | 0.847311085 | 1           |            |
| 0.868580854 | 0.710512354                                                                                           | 1.044027574 | 0.912169598 | 0.96460175  | 0.871245884 |            |
| YMR026C     | YMR026C::PEX12::C3HC4 zinc-binding integral peroxisomal membrane protein 1                            |             |             |             |             |            |
| 0.920197417 | 0.93168957                                                                                            | 1.222115453 | 1.31489915  | 1           | 0.932161974 |            |
| 0.946819647 | 0.972582121                                                                                           | 1.232763406 | 1           | 0.837007958 | 0.68568452  |            |
| 0.566115386 | 1.20824645                                                                                            | 1           | 1.359203114 | 1.456754337 | 1.35603256  | 1          |
| 0.88430783  | 0.988541021                                                                                           | 1.002165834 | 0.990090892 | 0.97262383  | 1           |            |
| 1.077936403 | 1.227769098                                                                                           | 1.032080328 | 0.990911638 | 1.274522503 | 1           |            |
| 1.340707707 | 1.194909501                                                                                           |             | 1.032543933 | 1.253840582 | 1.051624402 |            |
| YER131w     | YER131w::RPS26B::Homology to rat S26 0.93085295                                                       |             |             |             |             |            |
| 1.315334757 | 0.771520737                                                                                           | 1.585929785 |             | 0.966160917 | 0.964379419 |            |
| 1.273305813 | 1.307172365                                                                                           |             | 0.87287754  | 0.802807207 | 0.821501909 |            |
| 0.879132124 | 1                                                                                                     | 0.792538355 | 0.309761905 | 0.186768033 | 0.545230756 | 1          |
| 1.648205602 | 1.239685304                                                                                           | 1.135071366 | 0.779146655 | 1           | 0.781576641 |            |
| 1.007178938 | 0.831549108                                                                                           | 0.820158999 | 1.007313119 | 1           | 1.355566855 |            |
| 2.202429789 | 1.201953676                                                                                           | 0.888937544 | 2.286136583 | 1           | 1.095433034 |            |
| 1.350596944 | 1.233384533                                                                                           | 2.590615892 | 1.116090651 | 0.971066988 |             |            |
| YMR028W     | "YMR028W::TAP42::Two A phosphatase Associated Protein, apparant MW of 42 kDA" 1                       |             |             |             |             |            |
| 0.904639326 | 1.57462104                                                                                            |             | 1           | 0.905501411 | 1.17377894  | 1.31589688 |
| 1.170444095 | 1                                                                                                     | 0.950565451 | 0.763420187 | 1.040861047 | 1.478758032 | 1          |

1.151037407 1.678621368 1.558529617 0.915375868 1 1.0534027  
1.161341271 0.997533432 0.757715656 1.11093482 1 1.164859892  
1.282653916 0.902410915 1.288838856 1.474267577 1 1.197174292  
1.232328472 1.187332554 1.402538895 1.201720303 1.235505476  
YER133w YER133w::GLC7::Glycogen accumulation. Giplp-Glc7p phosphatase complex is required for proper septin organization and initiation of spore wall formation during sporulation. 1 1.073469531 1.038944817 1.170530061  
1.204740676 1 1.0807092 1.071742326 1.105874844 1.004316823 1  
0.953509818 0.952229077 0.925473335 1.006648327 1 1.665531451  
1.24856175 1.276534287 1.498024066 1 0.609458757 0.880999846  
1.228013704 1 0.936383769 1.071590235 0.977378179 0.849762937  
1.09014545 1 1.031703166 0.965719559 0.897044567 0.798222489  
1.02486684 1 1.201627163 1.150322299 0.97828169 1.272999439  
1.505861136 1.119923134  
YMR030W YMR030W::YMR030W::molecular\_function unknown 1 1.004644711  
1.315897939 1.289280067 1.603520297 1 1.125402789 1.443585214  
1.202471734 1.17138088 1 1.257619839 1.295827473 1.628604609  
1.310584736 1 1.33883461 1.18268615 1.598465163 1.713943751 1  
1.25047329 2.078417917 1.455632586 0.799325306 1 0.891098546  
0.921794487 0.771668911 1.027816032 1 1.170782711 1.547977782  
1.553242628 1 1.175277808 1.389253048 1.26788763 1.448196936  
1.352839042  
YER147c YER147c::SCC4 1 0.874792095 0.971564727 1.131527499  
0.756048964 1 0.946549617 1.128241697 1.097621082 1.070018363 1  
1.056086193 0.960722174 0.971381105 1.16389229 1 0.53917797  
0.640287527 0.726112273 1 0.754966276 0.880899216 1  
0.964275191 0.928181911 0.95579864 0.972636862 0.876625715 1  
1.048007238 0.979009932 0.996029033 1.263197729 1.39469368 1  
0.890345823 0.941285834 0.9948935 2.618098159 0.807689022 1.172460524  
YMR032W YMR032W::HOF1::SH3 domain containing-protein required for cytokinesis 1 0.552199268 0.799706237 0.795476145 0.642426415 1  
0.873407436 0.921194644 0.746592556 1 0.737561652 0.860330949  
0.657551851 0.664954922 1 1.046134716 0.63231955 0.449041927 1  
1.595615343 1.621091098 1.569940853 0.437785251 1 0.92975544  
0.861795831 0.91778641 1.064440671 1.095361432 1 1.081479466  
0.62555785 0.556393691 0.763937631 1.388907178 1 0.934607385  
0.734970355 1.012724813 0.703040934 0.986175474 0.850230918  
YER149c YER149c::PEA2::Pea2p is localized with Spa2p to sites of polarized growth and is required for efficient mating and bipolar budding; it is required for pheromone-induced shmoo formation 1 0.949974035 1.013491173  
1.044246985 1.023172439 1 0.884148021 0.922323414 1.043657099  
1.270517453 1 0.796061397 0.732555909 0.739088314 1.175135449 1  
0.74086112 0.617159956 0.527143926 0.725665825 1 0.979840766  
1.004600775 0.935004838 1.108618463 1 0.828098236 0.887537847  
0.838817885 0.791551864 0.988909843 1 1.122458705 0.984324314  
0.951046307 1.20394528 1.080285639 1 0.940729211 0.89206132  
0.895120671 0.811765268 0.910273469 0.95705708  
YMR035W YMR035W::IMP2::Inner membrane protease (mitochondrial protein) 1  
1.113054566 1.124492314 1.041878674 1.400060047 1 1.081841294  
0.989092722 1.372806773 1.283750158 1 1.017205528 1.254029328  
1.325862539 1.237841736 1 0.892689219 0.927633844 0.803972871  
1.258654951 1 1.063097366 1.28133233 1.48046484 1.390489381 1  
1.139719998 1.071027769 1.34237681 0.989158264 0.993761894 1  
1.270918694 1.73523456 1.679831723 1.179279689 1.188403325 1  
1.330795154 1.112926684 1.099815711 1.355213877 1.117152983 1.227624805  
YER151c YER151c::UBP3::Possible role for UBP3 in controlling the activity or assembly of the SIR protein complex. 1 1.047745439 1.082274583

|                                      |                                                                      |             |             |             |             |             |   |
|--------------------------------------|----------------------------------------------------------------------|-------------|-------------|-------------|-------------|-------------|---|
| 1.054689048                          | 1.242027871                                                          | 1           | 1.005891915 | 0.956750786 | 1.111791011 |             |   |
| 1.123250911                          | 1                                                                    | 0.883228417 | 1.124121949 | 1.243313182 | 1.121555508 | 1           |   |
| 0.944001278                          |                                                                      | 0.841028282 |             |             |             | 1.005598963 | 1 |
| 1.163445465                          | 1.118207522                                                          | 1.123712103 | 0.922428322 | 0.893788243 | 1           |             |   |
| 1.283279737                          | 1.295677956                                                          | 1.093815946 | 1.154380607 | 1.057128771 | 1           |             |   |
| 1.02803711                           | 1.305657647                                                          | 1.125249818 | 1.14727106  | 1.097199106 | 1.897477256 |             |   |
| YMR037C                              | YMR037C::MSN2::Transcription factor. Multicopy suppressor of snf1    |             |             |             |             |             |   |
| mutation.                            | 1                                                                    | 0.663186062 | 0.735280938 | 1.007048341 | 0.725516813 | 1           |   |
| 0.884066719                          | 1.067878702                                                          | 0.610667786 | 0.667354381 | 1           | 0.907471139 |             |   |
| 0.875461716                          | 0.635777447                                                          | 0.793612799 | 1           | 0.885743186 | 0.674066379 |             |   |
| 0.862796234                          | 0.547577434                                                          | 1           | 0.870502129 | 1.162663626 | 0.808813527 |             |   |
| 0.85522655                           | 1                                                                    | 0.955034978 | 0.894389649 | 1.085117895 | 0.915651058 |             |   |
| 0.829421797                          | 1                                                                    | 1.241541374 | 0.932632389 | 0.850052616 | 1.212533621 |             |   |
| 0.703191438                          | 1                                                                    | 1.009109136 | 0.896773635 | 1.168246245 | 1.023241763 |             |   |
| 1.068432434                          | 0.846728415                                                          |             |             |             |             |             |   |
| YMR053C                              | YMR053C::STB2::binds Sin3p in two-hybrid assay and is part of large  |             |             |             |             |             |   |
| protein complex with Sin3p and Stb1p | 1                                                                    | 0.802829165 |             |             | 1.015250463 |             |   |
| 1.100127357                          | 1                                                                    | 0.865199837 | 0.964472114 | 1.0966081   | 0.909727638 | 1           |   |
| 1.076666154                          | 1.410932052                                                          | 0.96169545  | 1.470524562 | 1           | 1.515963125 |             |   |
| 1.520874739                          |                                                                      | 0.554143505 | 0.627320847 | 0.556097768 | 0.455509146 | 1           |   |
| 1.075129173                          | 1.319712525                                                          | 1.199112004 | 0.781982812 | 1.003906993 | 1           |             |   |
| 1.427438556                          | 2.154898839                                                          | 1.39412347  | 1.099398919 | 1           | 1.70123572  |             |   |
| 1.507402741                          | 1.745409611                                                          |             | 1.270162921 | 0.913275817 |             |             |   |
| YMR055C                              | YMR055C::BUB2::Protein required for cell cycle arrest in response to |             |             |             |             |             |   |
| loss of microtubule function         | 1                                                                    | 1.066594083 | 0.935503769 | 1.076888318 |             |             |   |
| 0.890963283                          | 1                                                                    | 0.95917358  | 0.971539124 | 0.911666178 | 0.964609524 | 1           |   |
| 1.317581448                          | 1.04575099                                                           |             | 1.149509224 | 1           | 1.045951043 | 0.972197923 |   |
| 1.192424551                          | 0.515667285                                                          | 1           | 0.431985462 | 0.32306671  | 0.260776977 |             |   |
| 0.536220065                          | 1                                                                    | 1.176945508 | 0.885315639 | 0.822842371 | 1.04275831  |             |   |
| 0.751919891                          | 1                                                                    | 0.897101343 | 0.890962459 | 1.139580731 | 1.212076564 |             |   |
| 1.016525937                          | 1                                                                    | 0.984092674 | 1.012130562 | 0.986656676 | 0.652974987 |             |   |
| 0.90566037                           | 0.852857756                                                          |             |             |             |             |             |   |
| YLL021w                              | YLL021w::SPA2::spindle pole antigen                                  |             |             |             |             |             |   |
| 1                                    | 1                                                                    | 1.121741099 | 1.048072118 |             |             |             |   |
| 1.022527753                          | 1                                                                    | 1.048211875 | 1.070770373 | 0.931792249 | 1           |             |   |
| 1.131949268                          | 1.08636663                                                           | 0.698432001 | 1           | 0.890576056 |             |             |   |
| 0.89826793                           | 0.661249881                                                          |             | 0.686858499 | 0.783871491 | 0.703375714 | 1           |   |
| 1.062684979                          | 0.960250291                                                          | 1.280676184 | 1.216914203 | 1.161973908 | 1           |             |   |
| 0.925585602                          | 0.805422177                                                          | 0.992125688 | 1.312838652 | 0.621786713 | 1           |             |   |
| 0.94796209                           | 1.014249014                                                          | 1.533017925 | 0.874121117 | 0.974348547 | 0.83184279  |             |   |
| YMR057C                              | YMR057C::YMR057C::molecular_function unknown                         |             |             |             |             |             |   |
| 1                                    | 1                                                                    | 1.251071761 |             |             |             |             |   |
| 1.848292425                          | 1.525304288                                                          | 1           | 1.394624501 |             | 1           |             |   |
| 1.437969739                          | 1.653106004                                                          | 1.953966677 | 1           | 1.140211523 |             |             |   |
| 1                                    | 0.81061174                                                           |             | 2.301943968 | 1.070502845 | 0.916719389 |             |   |
| 1.028511875                          | 0.871710405                                                          | 1           | 1.0064857   | 1.031619854 | 0.999245109 |             |   |
| 0.923885366                          | 0.806343811                                                          | 1           | 0.932042021 | 0.710705319 | 0.953076748 |             |   |
| 0.529229911                          | 0.806750684                                                          | 0.784559128 |             |             |             |             |   |
| YLL023C                              | YLL023C::YLL023C::molecular_function unknown                         |             |             |             |             |             |   |
| 1                                    | 1                                                                    | 1.329733703 |             |             |             |             |   |
| 0.992012297                          | 1.110008727                                                          | 1.158275125 | 1           | 1.219767164 | 1.164610479 |             |   |
| 0.942549976                          | 1.292422771                                                          | 1           | 1.464966086 | 1.547739062 | 2.814011247 |             |   |
| 1.177543595                          | 1                                                                    | 2.423776405 | 2.021010964 | 3.989312341 | 1.824349138 | 1           |   |
| 1.835376248                          | 1.532075888                                                          |             | 1.92250272  | 1           | 1.372151923 | 1.731019563 |   |
| 1.699584375                          | 1.256980165                                                          | 0.789165804 | 1           | 0.907305215 | 1.343846441 |             |   |
| 1.827582819                          | 1.318209073                                                          | 0.796671352 | 1           | 1.584417723 | 1.736322598 |             |   |
| 1.199429577                          | 1.032543933                                                          | 1.308205157 | 1.270530402 |             |             |             |   |
| YLL025W                              | YLL025W::YLL025W::molecular_function unknown                         |             |             |             |             |             |   |
| 1                                    | 1                                                                    | 1.274107129 |             |             |             |             |   |
| 1.335066348                          | 1.015930108                                                          | 1.344097154 | 1           | 0.970181766 | 0.884314806 |             |   |
| 1.360293046                          | 1                                                                    | 1.235388591 | 1.22530713  | 2.34467786  | 1.118044734 | 1           |   |

|             |                                                                                                                                                                 |             |             |             |             |
|-------------|-----------------------------------------------------------------------------------------------------------------------------------------------------------------|-------------|-------------|-------------|-------------|
| 1.763271822 | 8.853938906                                                                                                                                                     | 1.810409749 | 1.939593849 | 1           | 1.838179818 |
| 2.582486917 | 1.825030047                                                                                                                                                     | 1.307140908 | 1           | 1.147177841 | 1.194564292 |
| 1.018801752 | 1.122684912                                                                                                                                                     | 0.997607776 | 1           | 1.122102394 | 1.533067064 |
| 1.510287795 | 1.487704244                                                                                                                                                     | 1.910149968 | 1           | 0.956055175 | 1.387512507 |
| 1.14169113  | 1.2697762                                                                                                                                                       | 1.338583772 | 1.305555433 |             |             |
| YLR260W     | YLR260W::LCB5::involved in sphingolipid biosynthesis 1                                                                                                          |             |             |             |             |
| 0.773040865 | 0.700262873                                                                                                                                                     | 0.823074282 | 0.654178994 | 1           | 0.849157854 |
| 0.901714936 | 0.754780313                                                                                                                                                     | 0.748866092 | 1           | 0.878705699 | 0.920465109 |
| 1.052086871 | 1                                                                                                                                                               | 0.778934562 | 0.961789343 | 0.889921008 | 1.025027043 |
| 0.650769371 | 0.581473859                                                                                                                                                     | 0.51853998  | 0.543567    |             | 1.151532285 |
| 1.162466474 | 1.1234825                                                                                                                                                       | 0.916229468 | 0.937734578 | 1           | 1.058547398 |
| 0.963312537 | 0.979295015                                                                                                                                                     | 0.827073798 | 1           | 1.569300519 | 1.074793878 |
| 0.474313463 | 0.878509529                                                                                                                                                     | 0.822210945 |             |             |             |
| YLR262C     | YLR262C::YPT6::Ras-like GTP binding protein involved in the secretory pathway. Ypt6p is required for fusion of endosome-derived vesicles with the late Golgi. 1 |             |             |             |             |
|             | 0.800313617                                                                                                                                                     | 0.919781997 | 0.838506648 | 1.050946282 | 1           |
|             | 0.787435237                                                                                                                                                     | 1.008189311 | 0.968911533 | 1           | 0.909639459 |
|             | 1.081182575                                                                                                                                                     |             |             |             |             |
| 0.95666391  | 1.065327717                                                                                                                                                     | 1           | 1.112779097 | 0.928939984 | 0.849086174 |
| 1.052788032 | 1                                                                                                                                                               | 2.392875057 | 1.343048389 | 2.104073423 | 1.455754356 |
| 1           |                                                                                                                                                                 |             |             |             |             |
| 0.985563405 | 1.246799152                                                                                                                                                     | 0.991238746 | 0.825693904 | 1.101773166 | 1           |
| 1.062878699 | 1.648262454                                                                                                                                                     | 1.358491145 | 1.299844015 | 1.855018553 | 1           |
| 1.404293107 | 1.490660139                                                                                                                                                     | 1.178962889 | 1.056010856 | 1.541835998 | 1.61202375  |
| YLR264W     | YLR264W::RPS28B::Homology to mammalian S28 1                                                                                                                    |             |             |             |             |
|             |                                                                                                                                                                 |             |             |             | 1.782683588 |
| 1.431351957 | 0.885420686                                                                                                                                                     | 1.639489511 | 1           | 0.90841664  | 1.062230097 |
| 1.403405154 | 1.074384592                                                                                                                                                     | 1           | 0.916780716 | 0.763910545 | 1.720750789 |
| 1.007245493 | 1                                                                                                                                                               | 0.333255552 | 1.133810118 | 0.230399455 | 0.448327245 |
| 1           |                                                                                                                                                                 |             |             |             |             |
| 1.315280889 | 1.024039301                                                                                                                                                     | 0.693046146 | 0.772767225 | 1           | 1.014266341 |
| 0.902455964 | 0.741811708                                                                                                                                                     | 0.839420935 | 1.356095289 | 1           | 1.063307583 |
| 1.640440817 | 0.92497913                                                                                                                                                      | 0.661003162 | 1.674540511 | 1           | 1.086509071 |
| 1.067127991 | 0.743048107                                                                                                                                                     | 1.420699256 | 1.106510072 | 1.016599476 |             |
| YLR266C     | YLR266C::PDR8::Pleiotropic Drug Resistance 1                                                                                                                    |             |             |             |             |
|             |                                                                                                                                                                 |             |             |             | 1.069215484 |
| 0.817280262 | 0.876664393                                                                                                                                                     | 0.795066446 | 1           | 0.863741978 | 0.93846434  |
| 0.753735605 | 1                                                                                                                                                               | 0.960320263 | 0.911884239 | 0.810340192 | 0.934222196 |
| 1           |                                                                                                                                                                 |             |             |             |             |
| 0.857836006 | 0.239030727                                                                                                                                                     | 0.603438157 | 0.976701437 |             | 0.759036896 |
| 0.461824433 | 0.707540518                                                                                                                                                     | 0.709898499 | 1           | 0.885250017 | 1.257011856 |
| 1.070591952 | 0.801341999                                                                                                                                                     | 1.086903035 | 1           | 1.110875837 | 1.124455957 |
| 1.297714394 | 1.071822724                                                                                                                                                     | 0.92537938  | 1           | 1.709241505 | 1.556668561 |
| 1.266442234 | 1.296388009                                                                                                                                                     | 1.552792752 | 1.332699689 |             |             |
| YLR268W     | YLR268W::SEC22::Synaptobrevin (v-SNARE) homolog present on ER to Golgi vesicles 1                                                                               |             |             |             |             |
|             |                                                                                                                                                                 |             |             |             | 1.345898758 |
| 1.000890217 | 1.11774737                                                                                                                                                      | 1.13701115  | 1.267829481 | 1           | 0.86396768  |
| 1.014587212 | 0.892532844                                                                                                                                                     | 1.2579573   | 1           | 0.88353056  | 1.03232978  |
| 0.657728305 | 0.823269348                                                                                                                                                     | 1           | 1.394263899 | 1.293186156 | 1.818950138 |
| 1.288947959 | 1                                                                                                                                                               | 1.268245785 | 1.230569886 | 2.883166458 | 4.33078196  |
| 1.030941777 | 1                                                                                                                                                               | 1.013747829 | 1.369084135 | 1.1585768   | 0.866081541 |
| 1.33809275  | 1                                                                                                                                                               | 0.988741292 | 0.956877818 | 0.874670494 | 0.862980611 |
| 1.249879518 | 0.948300744                                                                                                                                                     |             |             |             |             |
| YLR270W     | YLR270W::HNT4::trehalase-associated protein 1                                                                                                                   |             |             |             |             |
|             |                                                                                                                                                                 |             |             |             | 1.080208385 |
| 1.322318763 |                                                                                                                                                                 | 1           | 1.448565706 | 1.34594294  | 1           |
| 1.183773929 | 1.837197125                                                                                                                                                     | 1.334642547 | 1           | 1.414863582 |             |
| 1.748773013 | 1                                                                                                                                                               | 1.524728888 | 1.661231993 | 2.45149064  | 1.796784829 |
| 1           |                                                                                                                                                                 |             |             |             |             |
| 1.046344111 | 1.527558163                                                                                                                                                     | 2.063550277 | 0.97326857  | 1.06171355  | 1           |
| 1.428468169 | 1.795900799                                                                                                                                                     | 3.129340607 | 2.473064258 | 1.411645486 | 1           |
| 1.431049577 | 1.686906184                                                                                                                                                     | 1.673501934 | 0.810382897 | 2.2927527   | 0.90364392  |
| YLR284C     | YLR284C::ECI1::enoyl-CoA isomerase 1                                                                                                                            |             |             |             |             |
|             |                                                                                                                                                                 |             |             |             | 0.68625456  |
| 1.325527399 | 1.295397301                                                                                                                                                     | 1           | 1.221059456 | 1.404821839 | 1.507089924 |
| 1.490749676 | 1                                                                                                                                                               | 0.909654443 | 1.511887412 | 1.035281836 | 1.309033655 |
| 1           |                                                                                                                                                                 |             |             |             |             |

1.233365876 1.504054748 2.222879115 1 2.165601389 2.038203301  
3.361375938 2.022303415 1 0.84116685 1.186108342 1.028563253  
1 0.851106529 1.182151487 1.273920395 1.446472723 1  
0.932654804 1.10886111 0.361993702 1.879918312  
YER153c YER153c::PET122::translational activator of cytochrome c oxidase  
subunit III 1 1.09303244 1.04252892 0.803391512 1 1.241980793  
1.162433381 1.052356777 0.98408837 1 1.154711235 1.290207038  
1.109715831 1.210083437 1 0.956707907 0.672131369 1.032901895  
1.224778119 1 1.03928709 2.398778984 1.62237023 0.679362189 1  
1.13678141 1.340988038 1.283435605 0.992960519 0.885739552  
0.850701175 0.91603616 1.957390186 1 0.670388216 0.813843834  
1.042558443 1.043726236 0.927285829  
YER155c YER155c::BEM2::Protein with role in bud emergence  
1.078607396 0.979383496 1.185234696 1.01616981 1.106605361  
1.067627307 0.870511867 0.920596282 0.97415069 1.006946607  
0.723342375 0.902627849 0.886041652 0.611114628  
1.214385796 1 0.844967142 0.737948606 0.876768546  
0.957720441 0.769859961 1 0.959819645 1.058485944 0.760435239  
1.155955738 0.862686832 1 1.070142562 0.99152685 1.022839582  
1.113883417  
YDL106C YDL106C::PHO2::Regulation of phosphate metabolism 1  
0.831017463 0.980338415 0.935964007 0.964905724 1 0.931233328  
0.928744939 0.840259886 0.773128148 1 0.928337244 0.995828924  
0.942454873 0.77709326 1 1.04647088 0.929789769 0.735087751  
0.709951004 1 1.090278825 1.270546724 1.053491448 1.172023148 1  
1.027809243 0.92278327 0.880614583 0.721462911 1.094655623 1  
1.062461306 0.970383217 1.130459108 0.799273397 0.764383632 1  
1.013186434 1.037804302 0.980807268 1.13912913 0.908333629 1.127803701  
YER157w YER157w::COG3::<b><u>C</u></b>onserved <b><u>O</u></b>ligomeric  
<b><u>G</u></b>olgi complex <b><u>3</u></b><br>secretion (golgi retention)  
deficient 1 0.960969745 0.921518078 1.1510649 0.981541022 1  
1.113039616 0.94559661 1.055663415 0.971755791 1 1.019455541  
0.854879169 0.600925101 1.045310941 1 1.255040993 0.995117204  
0.982256095 1 1.423488381 1.087474076 1.301477177 1.267365478 1  
0.86919403 0.962104201 0.89200596 0.905171858 1 1.03157852  
0.901070973 0.841243165 0.831295538 0.883073679 1 1.112543996  
1.047617598 1.118748854 0.761792884  
YDL108W "YDL108W::KIN28::serine-threonine kinase, subunit of transcription  
factor TFIK, a subcomplex of TFIIH" 1 0.804693553 0.954234664  
0.889965521 0.948074601 1 0.887401809 0.83569067 1.124151915 1  
0.759315121 0.892071491 1.078357121 1.074089523 1 1.034667005  
0.816265901 1.250822921 1.343175476 1 0.947676437 1.948707111  
1.64848302 0.725226968 0.663072607 0.933286668 0.929499937  
0.72231848 0.909985248 1 1.000998405 0.856340522 1.109753832  
0.955862771 1 0.886701762 0.774037609 0.902721974 1.06093891  
0.599875145 0.792439695  
YER171w YER171w::RAD3::DNA helicase component of transcription factor b  
(yeast homolog of human TFIIH) 1 0.959014798 0.827662639 1.071867595  
0.872997352 1 0.961925095 0.994743873 1.002076871 0.872518879 1  
0.819690853 0.708104644 0.594599371 0.920618739 1 0.795765985  
0.927718713 0.744918263 1 0.972690527 1.10055822 1.198281159  
1.05239488 1 0.717156649 0.610538684 0.59019916 0.735812626  
0.809453089 1 0.925128366 0.767756192 0.593242657 0.753845627  
1.055621349 1 1.0451773 0.96072133 1.159894196 1.301742827  
1.138397806  
YDL122W YDL122W::UBP1::Ubiquitin-specific protease 1 0.814512642  
0.880437816 1.289136301 0.990344788 1 1.076600823 1.132893859

|             |                                                                                                                                                                                            |             |             |             |             |   |
|-------------|--------------------------------------------------------------------------------------------------------------------------------------------------------------------------------------------|-------------|-------------|-------------|-------------|---|
| 0.939694578 | 0.934492081                                                                                                                                                                                | 1           | 0.742201906 | 0.700645742 | 0.554261939 |   |
| 1.111957894 | 1                                                                                                                                                                                          | 0.713215172 | 0.526070602 | 0.787828623 | 1           |   |
| 0.643866447 | 1.065415189                                                                                                                                                                                | 0.807593042 | 0.875636663 | 1           | 0.810286817 |   |
| 0.699675868 | 0.635531044                                                                                                                                                                                | 0.860274804 | 0.948177122 | 1           | 0.88851349  |   |
| 0.686262685 | 0.692226435                                                                                                                                                                                | 0.770105007 | 0.798893381 | 1           | 0.729907619 |   |
| 0.74830212  | 0.838856187                                                                                                                                                                                | 0.986106799 | 0.754658236 | 0.817832829 |             |   |
| YER173W     | YER173W::RAD24::checkpoint protein                                                                                                                                                         | 1           | 0.788067812 | 0.925122409 |             |   |
| 1.154996982 | 1.086310982                                                                                                                                                                                | 1           | 0.99844084  | 1.020187545 | 1.172947394 |   |
| 1.210647457 | 1                                                                                                                                                                                          | 0.743110453 | 0.821184858 | 1.086333175 | 1           |   |
| 0.859849391 | 0.777484733                                                                                                                                                                                |             | 0.478472653 | 0.772689312 |             |   |
| 0.47007831  | 0.67945875                                                                                                                                                                                 |             |             |             | 1           |   |
| 0.812373344 | 0.823836134                                                                                                                                                                                | 0.851512733 | 1.110540026 | 1.227272645 |             |   |
|             | 0.942319628                                                                                                                                                                                | 0.800320314 |             |             |             |   |
| YDL124w     | YDL124w::YDL124W::molecular_function unknown                                                                                                                                               | 1           | 0.70971545  |             |             |   |
| 1.045403581 | 1.036870509                                                                                                                                                                                | 1.179499867 | 1           | 0.938564026 | 1.260355536 |   |
| 1.188009183 | 1.36718457                                                                                                                                                                                 | 1           | 1.650453696 | 3.251570301 | 3.841803562 |   |
| 1.783001358 | 1                                                                                                                                                                                          | 4.263859736 | 6.253271859 | 5.603631659 | 4.513543974 | 1 |
| 3.038635066 | 2.074717428                                                                                                                                                                                | 3.590039663 | 2.678946624 | 1           | 1.948641467 |   |
| 3.741556004 | 3.304163014                                                                                                                                                                                | 0.842027242 | 0.956581396 | 1           | 3.19482434  |   |
| 7.001184978 | 7.378131885                                                                                                                                                                                | 4.552214294 | 2.056018561 | 1           | 2.888342972 |   |
| 4.813402522 | 3.078269577                                                                                                                                                                                | 1.056077657 | 2.615485582 | 1.763506683 |             |   |
| YER175c     | YER175c::TMT1::Trans-aconitate Methyltransferase                                                                                                                                           | 1           | 1           |             |             |   |
| 1.149665141 | 1.413170135                                                                                                                                                                                | 0.999702442 | 0.919462847 | 1           | 1.01182309  |   |
| 1.156185472 | 1.028524524                                                                                                                                                                                | 0.998637151 | 1           | 4.618334962 | 4.107628514 |   |
| 1.345863931 | 0.939962458                                                                                                                                                                                | 1           | 2.740245793 | 2.381141509 | 1.050849863 |   |
| 1.011859883 | 1                                                                                                                                                                                          | 5.190886915 | 4.300173164 | 2.367668529 | 1.087623968 | 1 |
| 1.206275337 | 1.815542908                                                                                                                                                                                | 1.991564623 | 1.049591514 | 1.102857536 | 1           |   |
| 2.47233672  | 3.036877729                                                                                                                                                                                | 5.879324292 | 1.799041096 | 1           | 3.290157708 |   |
| 2.236928307 | 1.425240517                                                                                                                                                                                | 0.71555532  | 1.223822087 | 0.999962573 |             |   |
| YDL126C     | "YDL126C::CDC48::Microsomal protein of CDC48/PAS1/SEC18 family of ATPases; full length homology to mammalian protein VCP; involved in secretion, peroxisome formation and gene expression" | 1           | 0.723332902 | 0.734429257 |             |   |
| 1.347990383 | 0.602849007                                                                                                                                                                                | 1           | 1.103512151 | 1.319957364 | 0.761121758 |   |
| 0.791461907 | 1                                                                                                                                                                                          | 0.960354644 | 1.156051077 | 0.629204946 | 0.972526303 | 1 |
| 1.821827308 | 1.984145532                                                                                                                                                                                | 2.010223563 | 0.858697751 | 1           | 1.124150926 |   |
| 0.56935627  | 0.842797686                                                                                                                                                                                | 0.999525075 | 1           | 0.987567543 | 1.278048408 |   |
| 1.86804282  | 1.225414318                                                                                                                                                                                | 0.972810018 | 1           | 1.290505393 | 0.964209706 |   |
| 1.755196549 | 1.076421168                                                                                                                                                                                | 0.452712846 | 1           | 0.937462767 | 0.964779466 |   |
| 1.250971072 | 0.541682717                                                                                                                                                                                | 0.866530839 | 0.694369817 |             |             |   |
| YER177w     | YER177w::BMH1::Brain Modulosignalin Homolog                                                                                                                                                | 1           | 0.950797071 |             |             |   |
| 1.112104361 | 0.903616104                                                                                                                                                                                | 1.138962882 | 1           | 0.975948661 | 1.002688151 |   |
| 1.131992041 | 1.277393863                                                                                                                                                                                | 1           | 0.904988087 | 1.037250287 | 1.598336406 |   |
| 0.921844907 | 1                                                                                                                                                                                          | 1.736444438 | 1.454128668 | 2.064352876 | 2.147974838 | 1 |
| 1.545606669 | 2.195318415                                                                                                                                                                                | 2.933713658 | 1.596879882 | 1           | 1.042143109 |   |
| 1.006979241 | 1.2439666                                                                                                                                                                                  | 0.913614298 | 0.858179797 | 1           | 1.046672719 |   |
| 1.494173113 | 1.214018355                                                                                                                                                                                | 0.764762001 | 1.224763436 | 1           | 1.072287678 |   |
| 1.03460415  | 0.928604635                                                                                                                                                                                | 0.872341734 | 1.262784568 | 1.095405665 |             |   |
| YDL128W     | "YDL128W::VCX1::Similar to sodium/calcium exchangers, including bovine Na+/Ca2+,K+ antiporter; putative vacuolar transmembrane protein"                                                    | 1           |             |             |             |   |
| 1.10495509  | 0.827592401                                                                                                                                                                                | 1.140296647 | 0.798352457 | 1           | 1.144953409 |   |
| 1.034923361 | 0.810965274                                                                                                                                                                                | 0.966637379 | 1           | 1.166117237 | 1.037639153 |   |
| 0.938866297 | 0.774738404                                                                                                                                                                                | 1           | 1.722501974 | 1.591116557 | 1.640810146 |   |
| 0.992711619 | 1                                                                                                                                                                                          | 0.703227197 | 0.479974726 | 0.356070527 | 0.663640444 | 1 |
| 1.173616131 | 1.030658184                                                                                                                                                                                | 0.975358734 | 1.04500487  | 0.629702419 | 1           |   |
| 0.761892518 | 0.728601145                                                                                                                                                                                | 0.881750932 | 0.672098539 | 0.600214763 | 1           |   |
| 0.920551539 | 0.754422639                                                                                                                                                                                | 0.74254234  | 0.722780785 | 0.881745393 | 0.805574095 |   |



YER179w "YER179w::DMC1::Dispensable for double strand breaks, synaptonemal complexes, gene conversion in return to growth assay. Required for full pairing by in situ hybrid. assay, wt time of appearance of synaptonemal complexes and reciprocal Rec in growth assay" 1 1.24535713 0.878279781  
1.159321017 1 0.909998193 1.04994597 1.349058297 1.291321208 1  
1.097148114 1.048050634 1.082340227 1 0.777956613 0.393359024  
0.416482523 0.745067324 1 1.213324836 1.17152249 0.581897123  
0.720352517 0.942518934 1  
1 1.260361526 1.464817287 1.267027951

YDL130W "YDL130W::RPP1B::Homology to rat P1, human P1, and E. coli L12eIIB" 1 1.481055414 1.546864624 0.825963027 1.498116849 1 1.131956434  
1.089891296 1.026956227 1.150217032 1 1.302651157 1.016888271  
1.0564632 0.834342922 1 0.977807062 0.439283407 0.307335152  
0.953812619 1 1.39377895 1.08783707 0.554378786 0.562870347 1  
1.061560004 0.87812419 0.68861194 0.970046497 0.841036493 1  
0.94247529 1.19730098 0.721283409 0.523946112 1.308812233 1  
0.855071861 1.005384211 0.82656881 1.410246806 0.838881641 1.177714305

YER181c YER181c::YER181C::molecular\_function unknown 1 1.699659735  
1.902766916 1.620001423 2.085051531 1 1.525775743 1.200858563  
2.003709236 1.859247804 1 1.853410288 1.415927499 2.520072002  
1.547479749 1 1.361546273 1.52256485 1.341779622 1.763164414 1  
1.817221136 1.335895303 1 0.533297609 0.543127487  
0.583048459 0.891778701 1 0.963197952 0.919506523 1.225880095  
1.425732157 1 0.792319383 1.661934354

YDL132w "YDL132w::CDC53::acts together with Cdc4p and Cdc34p to control the G1-S phase transition, assists in mediating the proteolysis of the Cdk inhibitor Sic1p in late G1" 1 0.679646717 0.810769112 1.01753784 0.769178219 1  
0.981375313 1.051441404 0.798350179 0.668514941 1 0.895308039  
1.179951684 0.652774007 0.941207725 1 1.170854412 0.91816661  
1.032982131 0.869318948 1 1.129736738 0.91957628 1.090532925  
1.320175013 1 1.161205337 1.55183557 1.408989989 0.958139352  
0.970595299 1 1.434411376 1.212408184 1.712514067 1.149143835  
0.637116401 1 1.150325189 1.394620438 1.215451234 0.725797928  
1.063050381 1.047246286

YFL003C "YFL003C::MSH4::dispensable for DNA repair, required for full levels of reciprocal exchange and spore viability" 0.357394947  
1 1.075203606 2.215648728 0.764282403 1  
0.814003752 0.715079868 1 1.203251369  
1 1.030670583 1.785159754 0.956181415

YDL146w YDL146w::YDL146W::molecular\_function unknown 1 1.087484431  
1.05739513 0.957170813 0.746689703 1 1.056165557 1.110393092  
0.823365299 0.758728229 1 1.626179871 1.278157694 1.070196546  
0.80434845 1 1.402370172 1.887254572 0.945864224  
0.391160107 0.778280402 0.398597313 0.447899209 1.100175589  
1.283039043 1.4457765 0.818304402 0.853529843 1.093317828  
1.075850988 1.414596476 0.769449601 0.819194593 1 1.88160775  
1.3729304 0.950927634

YDL148c YDL148c::NOP14::part of small (ribosomal) subunit (SSU) processosome (contains U3 snoRNA); Nucleolar Protein 14 1 0.64501821 0.556033574  
0.985962582 0.857637245 1 0.745087728 0.683630697 0.832246018  
0.831033109 1 0.510474991 0.292512354 0.262248735 0.936698403 1  
0.185848656 0.133746981 0.341929664 1 0.453450761  
0.461341837 1 0.633287519 0.488122953 0.477268581 0.705333444  
0.784702252 1 0.787639876 0.60253311 0.441994227 1.045490152  
1.068426866 1 0.752894058 0.478374582 0.884567312 0.762322359  
0.593138437 0.590170598

YFL005W YFL005W::SEC4::Involved in transport and fusion of post-Golgi secretory vesicles to the plasma membrane 1 1.057986478 1.032649756  
0.971613744 0.938021917 1 0.998050775 0.900113433 1.229726071  
1.201621062 1 0.770525968 1.021682446 1.157087261 0.982664484 1  
1.35595178 1.008714217 1.027382084 1.592496059 1 1.350311141  
1.33123847 1.306386229 0.948216085 1 0.850489253 0.908718671  
0.823418078 0.929684028 0.812003357 1 0.968866223 1.111753036  
0.833975011 0.76951539 0.876112565 1 1.39419635 1.205666038  
0.97475716 1.026110624 1.460647737 1.214490457  
YFL007W YFL007W::BLM3::bleomycin resistance 1 1.3353708 1.138183603  
2.036697942 0.769467375 1 1.691979554 1.501711499 1.327681709 1  
1.33362859 1.642895546 1.27240378 1.649093971 1 1.573208235  
2.213960984 4.18621265 0.442985877 1 0.730920532 0.260323623  
0.150869176 1 0.896858333 0.858435674 0.948837347 1.067229995  
0.911890784 1 0.917568199 0.659920526 0.71727561 1.02269345  
0.347265771 1 0.765869438 0.682146663 0.82852363 0.513585819  
0.741273668 0.676857354  
YDL150W "YDL150W::RPC53::RNA polymerase III (C) subunit, homologus to human BN51 protein" 1 1.661786144 1.480648299 1.519458966 1.534647027 1  
1.495529423 1.484111153 1.622318366 1.704794369 1 1.478051366  
1.524007032 1.64939852 1.250142239 0.806930757 0.775063794  
1.234064134 0.790796909 1 1 1.232267977  
1.223208711 1.159474501 1.629949438 1.137710809 1 0.8942329  
0.723099959 0.732540916 1.012823324 0.591749091 1 0.623019039  
0.520949543 0.592537926 0.44569628 0.810210886 0.644459265  
YFL009W YFL009W::CDC4::Init. of DNA synthesis & spindle pole body separation; dispensable for both mitotic and meiotic spindle pole body dupl.; essential for mitotic but not premeiotic DNA synth.; wt levels of synaptonemal complexes and intragenic recombination 1 0.756807316 0.671553851  
0.831180055 0.57536329 1 0.92146792 0.95425275 0.696934594  
0.674504936 1 0.965883598 0.776535802 0.606987738 0.709736366 1  
1.063083874 0.754143032 0.844831956 0.767682637 1 1.05917163  
1.366639966 0.758783607 1 1.126571896 1.279654311 1.177769454  
1.232896315 1.033588008 1 1.147442262 0.89353639 0.895299613  
0.775542959 0.85407422 1 0.98510033 0.843648638 0.955593754  
0.820850806 0.812192249 0.794190973  
YDL152w YDL152w::YDL152W::molecular\_function unknown 1 0.877519284  
1.556854548 1.053231393 1 1.044813684 0.981626172 1.410405476  
1.323141587 1 1.051396608 2.02625795 1 0.267971525  
0.261067905 0.321263345 1 0.958893466 1.338929114 0.782707755 1  
0.697059864 0.629865037 0.675134418 0.791590518 1  
0.612601932 1.708103369 1 0.777724964 1.025820371  
0.81692141  
YFL010C YFL010C::WWM1::WW domain containing protein interacting with Metacaspase (MCA1) 1 1.081567812 1.212840287 0.71941552 0.686738133 1  
0.879152946 1.136906203 0.915467438 1.026204568 1 1.172575888  
1.348037396 1.859583021 0.839268003 1 1.058442558 1.591003797  
1.507545245 1 1.197555099 1.28239197 1.683772645 1.308535112 1  
0.889082735 1.077981832 1.453414287 1.078044367 0.774238138 1  
1.011730877 1.237906767 1.261307028 1.446067526 0.881287822 1  
0.778337253 0.859393214 1.129024641 0.460206224 0.963622572 1.056002518  
YDL154W "YDL154W::MSH5::dispensable for DNA repair and meiotic intrachromosomal reciprocal recombination, required for full reciprocal recombination between homologs, and spore viability" 1 1.154356887  
1.436693096 1.304183059 1 1.308434879 1.61095906 1.342101898 1  
1.022227807 1.0627444 1.309427808 1.469978304 1 0.529908321  
1.253235902 0.795463238 1 1.499364786 2.304299217 1.351751427 1

0.749875394 0.796467241 0.838891439 0.810546275 0.942175533 1  
0.77811523 0.735107115 0.713196384 0.87698877 1.322202297 1  
0.719549739 0.813431414 1.258753995 1.331163692 0.900141469  
YFL012W YFL012W::YFL012W::molecular\_function unknown 0.928390408  
1.177699658 0.972214552 0.837914231  
1.029896473 1 0.738899892 0.920600456 0.881427604 1  
0.744658104 1.849637011 1.023191265 0.967018392 0.609433351  
0.773136816 0.865812621 0.819082438 1  
4.584761358 0.353381824 0.651966693 0.172646885  
1.266152286  
YDL156w YDL156w::YDL156W::molecular\_function unknown 1 0.64905263  
0.718284271 1.028319369 1 0.87285324 0.997758287 0.806755777  
0.679327229 1 0.78336595 0.82888308 0.303877542 1.056952741 1  
0.517746743 0.652849974 1 0.679446352 1.553865236  
1.456970973 1 0.994301006 1.120779477 1.308637293 1.026341656  
1.032191074 1 0.952118478 0.850508563 0.815052412 0.947507229  
0.73822164 1 0.961411415 0.9225511 1.296035631 0.788770403  
0.932581127 0.860738375  
YFL026W YFL026W::STE2::alpha-factor pheromone receptor; seven-transmembrane  
domain protein 1 1.291066845 1.01315102 1.013353801 1.151306404 1  
1.062585199 1.028927947 1.11374773 1 1.100437234 1.003537217  
0.925182993 0.999386949 1 0.776251472 0.609353463 0.783292694  
0.707166024 1 0.759575815 0.361666926 0.543671323 0.938395917  
0.873064649 0.846768935 0.802198874 0.908473012 0.999931199 1  
0.845243284 1.074806338 2.191005929 1 0.949638186  
0.934405607 1.022471849 0.75579924 1.290535596 0.923783274  
YDL170W "YDL170W::UGA3::Transcriptional activator necessary for gamma-  
aminobutyrate (GABA)-dependent induction of GABA genes (such as UGA1, UGA2,  
UGA4)" 1 1.491310963 1.090912203 1.196688183 1.113487843 1  
1.29044103 1.389599586 1.132106486 1.068214329 1 2.55674415  
1.022539828 0.775866087 1.001405004 1 0.963883171 0.965606813  
0.32125251 0.551184785 1 1.398155467 0.987987784 0.679024453  
1.01549735 1 0.643063574 0.604443424 0.589331247 0.679684915  
0.80621826 1 1.223962347 0.906342979 0.883832784 0.856599864  
0.879059892 1 1.322804407 0.8082206 0.952089954 0.678088566  
0.967047871 1.154072396  
YFL028C YFL028C::CAF16::CCR4 associated factor 1 1.050139542  
1.157577623 0.962566829 1.171849385 1 0.952895265 0.951031082  
1.441968095 1.185279072 1 1.331324665 1.229184256 1.092230801  
0.892576789 1 1.214079866 0.800595819 0.971635902 1.201424958 1  
1.246765226 2.891589162 1.616986767 1.032628454 1 1.051043537  
1.236805665 1.055462306 0.949239533 1.061388752 1 1.123000675  
1.337147525 0.893723666 0.821758714 1.343761003 1 1.513666851  
1.658408765 0.99457612 1.462609147 1.336517868 1.362470939  
YDL172c YDL172c::YDL172C::molecular\_function unknown 1 1.185761434  
1.271514754 1.026255081 1.290651551 1 1.008124838 0.997722371  
1.211912116 1.354741056 1 0.80741491 0.889614857 1.421441969  
1.081740468 1 0.818956003 1.049834442 1.032413155 1  
1.57520879 2.016176717 1.721668573 1.499129754 1 0.539085308  
0.622593206 0.504457969 0.581921576 0.705407587 1 0.749879818  
0.759942648 0.660259416 0.886811387 1.41825068 1 0.84094728  
0.821048853 0.991450781 1.298097654 1.26693517 1.384361518  
YFL030W YFL030W::YFL030W::molecular\_function unknown 1 1.201966087  
1.403008334 1.247671562 1.141102742 1 1.223748589 1.35622925  
1.612204874 1.514470868 1 1.433644465 1.775482531 1.39831935 1  
4.044158761 4.310890674 8.310608003 6.392433197 1 2.824630247  
4.63140905 6.656888565 3.248856092 1 0.777120125 0.957864892

1.093317916 0.915879378 0.732671491 1 1.351816395 1.764088514  
1.445405684 1.649360168 1 0.946639815 1.034737839 1.104393865  
0.866368914 1.678222162 1.03761439  
YDL174C YDL174C::DLD1::mitochondrial enzyme D-lactate ferricytochrome c  
oxidoreductase 1 1.486871059 1.61660119 1.275185104 1  
1.518044825 1.452483758 1.332267527 1.50633465 1 1.271039392  
1.621084489 1.534612294 1.291617347 1  
1 0.993899592 0.892718108 1.106149442 0.878104494  
0.77440625 1 0.800688983 0.671083304 0.620081121 0.873564848  
0.881695305 1 0.939301529 0.727442777 1.142394724 0.995724533  
1.342676942 0.791564082  
YFL032W YFL032W::YFL032W::molecular\_function unknown 1 1.434291141  
1.25730377 1.790507491 1.216298718 1 1.367995443 1.54839729  
1.501118116 1.676948352 1 1.303567879 1.420297962 1.729081044  
1.503655854 1 0.640041639 0.893922968 1.705795049 0.580381712 1  
1.00971486 0.820064406 0.778329836 1 1.215131062 1.145752955  
1.128700913 1.781676073 1.425675579 1 0.800987545 0.489068729  
0.478255488 0.988820603 0.442748346 1 0.760448059 0.46225253  
0.718087759 0.478584591 0.690984407 0.650588607  
YDL176w YDL176w::YDL176W::molecular\_function unknown 1 0.826955518  
0.761192013 0.932421818 0.788835499 1 0.947375387 0.985650936  
0.882430308 0.888890872 1 0.832970823 0.854838449 0.570786084  
0.912330835 1 0.634529629 0.529331969 0.646298353 0.880458137 1  
1.253389252 1.669859914 1.373377477 1.406793734 1 0.909327313  
0.943995327 0.870657854 1.0418927 1 0.971298611 0.994204613  
0.97815115 1.116064651 1.605298666 1 1.201209072 1.086169411  
1.138234961 0.96507078 1.274865054 1.049873177  
YFL034W YFL034W::YFL034W::molecular\_function unknown 1 0.673131782  
0.846176735 0.911613312 0.679529668 1 0.884585184 0.877862535  
0.758200997 0.71896299 1 0.901101517 1.014434078 0.770193718  
0.841747954 1 1.126484101 0.796829008 1.146946108 0.888406719 1  
1.120330185 1.372079131 1.190827428 0.680238107 1 0.803987557  
0.9823978 0.87064915 0.778331177 0.828504255 1 1.094412503  
1.086677015 0.942285601 1.209453569 0.716026771 1 1.048944992  
1.161237827 1.235515418 0.903475856 1.46256257 0.872121497  
YDL178W "YDL178W::DLD2::D-lactate dehydrogenase, located in mitochondrial  
matrix" 1 0.720461846 0.79420777 0.879551207 0.727856726 1  
0.832655364 0.817456148 0.892512873 0.859486454 1 0.770886046  
0.828871226 0.519554825 0.874173768 1 1.196829086 1.071954558  
0.97984213 1 1.33774663 1.125139076 1.104388994 1.317462922 1  
0.758083848 0.834447453 0.799890743 0.966041929 1.002363549 1  
0.978917756 0.63620745 0.692851474 0.971531488 1.347058389 1  
0.95035128 0.631379912 0.858647892 0.863762769 1.425568085 0.835345293  
YDL180w YDL180w::YDL180W::molecular\_function unknown 1 1.76052195  
1.626201235 1.69182128 1.769156114 1 1.503442858 1  
2.484710837 1.763786653  
1 1.662807624 1.589503017 1.439423409 1.261838799  
1.106338057 1 1.925793015 1.90472593 1.398192874 0.995127572  
1.037282311 1 1.714451793 1.251429929 1.251770271 1.015720435  
1.117020869 1.728481756  
YPL247C YPL247C::YPL247C::molecular\_function unknown 1 0.861411398  
0.947121064 0.672502179 0.452516036 1 1.038257923 1.317309849  
0.510807983 1 1.585796708 1.899034032 2.25238322 0.577450217 1  
2.628985897 1.873001409 3.10203203 1.613538841 0.910230278  
1.177618827 0.429417942 1 1.258757086 1.381341291 1.694065075  
1.233598687 1.034025784 1 1.25609646 0.95766397 1.720691798

|         |                                                                                                                                                                                              |             |             |             |             |             |             |
|---------|----------------------------------------------------------------------------------------------------------------------------------------------------------------------------------------------|-------------|-------------|-------------|-------------|-------------|-------------|
|         | 1.073932584                                                                                                                                                                                  | 0.737388909 | 1           | 1.239671489 | 0.822753699 | 1.117710116 |             |
|         | 0.407797751                                                                                                                                                                                  | 1.249866185 | 0.966688872 |             |             |             |             |
| YPL249C | YPL249C::GYP5::GAP for Ypt protein                                                                                                                                                           | 1           |             | 0.624276919 | 0.765100655 |             |             |
|         | 0.782045796                                                                                                                                                                                  | 0.620282553 | 1           | 0.736016902 | 0.774417902 | 0.627770007 |             |
|         | 0.637518836                                                                                                                                                                                  | 1           | 0.839456618 | 0.937321026 | 0.657656381 | 0.751594103 | 1           |
|         | 1.305093825                                                                                                                                                                                  | 1.043133272 | 1.197716988 | 1.301200166 | 1           | 1.205443567 |             |
|         | 1.631538989                                                                                                                                                                                  | 2.588828211 | 1.26894755  | 1           | 0.917562864 | 1.359678535 |             |
|         | 1.336352003                                                                                                                                                                                  | 0.95653776  | 0.912259794 | 1           | 1.243878273 | 1.289323644 |             |
|         | 1.736802238                                                                                                                                                                                  | 1.587699509 | 0.89315707  | 1           | 1.474665043 | 1.403540432 |             |
|         | 1.399772001                                                                                                                                                                                  | 0.770105722 | 1.30514709  | 0.80732532  |             |             |             |
| YPL251W | YPL251W::YPL251W::molecular_function unknown                                                                                                                                                 | 1           |             | 1.025341776 |             |             |             |
|         | 0.928968104                                                                                                                                                                                  |             | 0.437297312 | 1           | 0.848868913 | 0.518365312 |             |
|         | 0.562625946                                                                                                                                                                                  | 1           | 1.299999615 | 0.71653253  | 0.795946409 | 0.484367392 | 1           |
|         | 0.554494043                                                                                                                                                                                  | 0.447862728 | 0.471690815 | 0.892579107 | 1           | 0.569367324 |             |
|         | 0.397247274                                                                                                                                                                                  | 0.495255117 | 1           | 1.05933398  | 0.798035777 | 0.733336508 |             |
|         | 0.969718063                                                                                                                                                                                  | 0.923467896 | 1           | 0.650122807 | 0.658613208 | 0.54065435  |             |
|         | 0.715514501                                                                                                                                                                                  | 0.891088471 | 1           | 0.693752968 | 0.685458188 | 0.900486858 |             |
|         | 0.450118228                                                                                                                                                                                  | 0.924380179 | 0.936042061 |             |             |             |             |
| YPL265W | YPL265W::DIP5::dicarboxylic amino acid permease                                                                                                                                              | 1           |             | 0.72422654  |             |             |             |
|         | 0.533031744                                                                                                                                                                                  | 0.722331694 | 0.487004132 | 1           | 0.760414311 | 0.780191853 |             |
|         | 0.377119136                                                                                                                                                                                  | 0.384770385 | 1           | 0.716949142 | 0.67591276  | 0.429431241 | 1           |
|         | 0.846398126                                                                                                                                                                                  | 1.274726479 | 1.537027527 | 0.623823142 | 1           | 0.695311783 |             |
|         | 0.693148368                                                                                                                                                                                  | 1.01782083  | 0.826890076 | 1           | 0.821724509 | 1.148395789 |             |
|         | 1.929991859                                                                                                                                                                                  | 1.607662004 | 0.877472429 | 1           | 0.512279143 | 1.12080721  |             |
|         | 1.309805388                                                                                                                                                                                  | 0.746302121 | 0.554089225 | 1           | 0.8109451   | 1.165177563 |             |
|         | 2.003845171                                                                                                                                                                                  | 0.804404128 | 0.937619752 | 0.745156034 |             |             |             |
| YPL267W | YPL267W::YPL267W::molecular_function unknown                                                                                                                                                 |             |             | 0.607024492 |             |             |             |
|         | 0.906499132                                                                                                                                                                                  | 0.784938517 | 1.140498848 |             | 0.945706904 | 1.111658202 |             |
|         | 1.289826077                                                                                                                                                                                  |             | 0.555796347 | 0.561647746 | 0.850716031 | 1.492958202 | 1           |
|         | 0.614329849                                                                                                                                                                                  |             | 0.518659231 | 1.119063482 | 1           | 1.058273076 | 1.362676329 |
|         | 1.309465707                                                                                                                                                                                  | 1.799465619 | 1           | 0.891137516 | 0.957078427 | 0.922139267 |             |
|         | 0.705549899                                                                                                                                                                                  | 1.074893565 | 1           | 1.120356642 | 1.253060068 | 1.875111537 |             |
|         | 1.670614561                                                                                                                                                                                  | 1           | 0.94253836  | 1.448886422 | 0.592222587 | 1.545210403 |             |
| YPL269W | YPL269W::KAR9::cortical protein required for cytoplasmic microtubule orientation; localizes to the tip of shmoo projections and to the tip of budding cells in a cell-cycle dependent manner |             |             | 0.914846205 | 0.952051877 |             |             |
|         | 1.247850999                                                                                                                                                                                  | 0.927083669 |             | 1.027908044 | 1.407027362 | 1.079191636 |             |
|         | 1.123649002                                                                                                                                                                                  | 0.962522498 | 0.726848027 | 1.125837327 | 1           | 0.801999317 |             |
|         | 0.667899225                                                                                                                                                                                  | 0.588682933 | 1           | 0.842230324 | 1.002537601 | 1           |             |
|         | 1.139198699                                                                                                                                                                                  | 0.972844871 | 1.160547492 | 1.027079539 | 1.432151875 | 1           |             |
|         | 0.886697884                                                                                                                                                                                  | 0.796452379 | 1.016470896 | 1.081919659 | 0.843582374 | 1           |             |
|         | 1.035721542                                                                                                                                                                                  | 0.724179459 | 1.065481105 | 0.615784013 | 1.128144286 |             |             |
| YPL271W | YPL271W::ATP15::nuclear gene for ATP synthase epsilon subunit                                                                                                                                |             |             |             |             | 1           |             |
|         | 1.198188158                                                                                                                                                                                  | 2.339965897 |             | 2.634093247 | 1           | 1.477697766 |             |
|         | 1.824569606                                                                                                                                                                                  | 1.898542239 | 1           | 1.358362608 | 1.304701336 | 1.4999499   |             |
|         | 1.516432022                                                                                                                                                                                  | 1           | 0.97159881  |             | 0.807388021 | 0.986191057 | 1           |
|         | 1.981083054                                                                                                                                                                                  | 3.314969978 | 3.088287073 | 1.658615796 | 1           | 1.147084552 |             |
|         | 1.095490394                                                                                                                                                                                  | 0.639745024 | 0.741797262 | 1.007216555 | 1           | 1.084600667 |             |
|         | 1.486162311                                                                                                                                                                                  | 1.165509938 | 1.127017116 | 2.23548003  | 1           | 0.829137191 |             |
|         | 1.133765073                                                                                                                                                                                  | 0.814656748 | 1.465289649 | 1.563884656 | 1.162828628 |             |             |
| YPL273W | YPL273W::SAM4::AdoMet-homocysteine methyltransferase                                                                                                                                         | 1           |             |             |             |             |             |
|         | 1.552471254                                                                                                                                                                                  | 1.425312479 |             | 1.187609906 | 1           | 1.402948706 | 1.03685297  |
|         | 1.082115954                                                                                                                                                                                  | 1.192616503 | 1           | 1.288349143 | 1.441605284 | 0.914090101 |             |
|         | 1.484867235                                                                                                                                                                                  | 1           |             |             |             |             |             |
|         | 0.79774144                                                                                                                                                                                   | 0.667290747 | 0.991129812 |             | 0.867882909 | 1           | 1.492444179 |
|         | 1.461057084                                                                                                                                                                                  | 1.692101344 | 1.327519894 | 1.348919328 | 1           | 0.900175602 |             |
|         | 0.824400393                                                                                                                                                                                  | 0.663698129 | 0.69766481  | 0.482178932 | 3.159251427 |             |             |

YOR191W YOR191W::RIS1::Role in silencing 1 1.761524351 1.671010045  
1.711917546 1.86361847 1 1.690036283 1.414459084 1.424871351  
1.277417351 1 1.73878749 1.799105102 1.956065919 1.827744309  
0.832990802 1 0.485327033 1  
1.068792839 1.032552752 1.064443557 1.193628359 1.221886407 1  
1.02326802 0.618174502 1.041381713 1.016027944 0.53182931 1  
0.835754871 0.762399171 0.923349375 0.68502914 0.796599408 0.971942653  
YPL275W YPL275W::YPL275W::molecular\_function unknown 1 0.861879667  
0.509844625 1 0.92530847 0.678090049 1  
0.762327007 0.700842011 0.642480276 0.820942307 1 0.64587402  
1.384250498 0.828414083 1 1.046336756 1.7417881 1  
1.014800136 1.367461543 1.088074751 1 0.875904864  
1.073736409 1.26394437 2.032683698 1 0.786054315  
2.356182127  
YPR006C YPR006C::ICL2::2-methylisocitrate lyase 1 1.128849552  
1.017364674 1.22731085 1 0.777000662 0.937916627 1.148360361  
1.705237903 1 0.947241158 0.877258111 0.778594938 1.251339944 1  
0.667021953 0.679665484 0.856424296 1 1.707283712 2.706219458  
1.768418869 2.578594913 1 1.214586064 1.183244836 1.108542448  
1.109596243 1 1.015633668 1.328143146 1.379746346 1.350142615  
2.068280856 1 0.924214042 0.980574151 0.97829001 0.759117647  
1.363235515 1.278411073  
YOR193W YOR193W::YOR193W::molecular\_function unknown 1 1.024028095  
1.215902609 1.055598205 1.592911654 1 0.984818484 1.419629266  
1.205302929 1 0.930425414 1.571619112 1.352107623 1  
1.090518524 1.481469994 0.845223523 1.482626127 1 1.685325811  
1.564647523 1.613726755 1.132088449 1 0.974621912 1.148516215  
0.859935481 0.72793111 1.105244442 1 0.924315683 1.182605453  
1.333590096 1.186925279 1.991041818 1 1.166101212 1.416585994  
1.188633987 1.549884803 1.600499045 1.527963884  
YOR195W YOR195W::SLK19::synthetic lethal KAR3 1 0.72741778  
0.827360797 0.912349982 1.037657198 1 0.767822311 0.896078821  
0.778650497 1 0.61956329 0.798314821 0.547340027 1.043823063  
0.849743696 0.576262671 1  
0.792147146 0.881142631 0.761551195 1.094063804 1 1.097228623  
1.078091824 1.033693672 1.246441958 1.092936099 1 0.981752608  
1.264220558 1.379197212 1.33587887 1.312333451 1.044619396  
YOR197W YOR197W::MCA1::metacaspase 1 0.926285166 0.85274151  
0.928120525 0.707386428 1 1.007084257 0.982733242 0.782597184  
0.764306169 1 1.049195366 1.020283374 0.770872331 0.852815772 1  
0.95001594 0.869434195 0.743181822 0.714842048 1 0.674722252  
0.493531638 0.390978236 0.792592826 1 1.002715187 1.070089535  
1.257858977 0.998725231 0.925868643 1 1.080496909 0.859769628  
1.109491143 1.058572784 0.73115186 1 0.949060464 0.917795117  
1.033830267 0.931120834 0.775112713 0.888758347  
YOR199W YOR199W::YOR199W::molecular\_function unknown 1 1.149312776  
1.279080564 1.069334112 1.362586558 1 1.145545356  
1.41056438 1 1.194453752 1.123338149 1.181540852 1.012298996 1  
1.091280977 1.110598578 1.155461962 1 1.42150077 2.256154722  
1.229267636 0.660559459 1 0.956746463 0.988660007 0.823828379  
1.028498941 1.098185448 1 0.946901035 1.036757219 0.934358069  
0.777537904 1.545476175 1 1.000976544 1.204596879 1.14109832  
1.708787434 1.215316233 1.077017537  
YFL036W YFL036W::RPO41::mitochondrial RNA polymerase 1 0.865488946  
0.940910215 1.381720647 0.815889067 1 1.173582125 1.302926723  
1.154345636 0.863122746 1 0.863732028 1.048112672 1.180041504  
0.998295045 1 1.652823048 2.140238043 2.2634682 1.30170336 1

|         |                                                                                                                                                                                            |             |             |             |             |             |
|---------|--------------------------------------------------------------------------------------------------------------------------------------------------------------------------------------------|-------------|-------------|-------------|-------------|-------------|
|         | 0.671684249                                                                                                                                                                                | 0.718858243 | 0.450715747 | 0.516682382 | 1           | 1.144927229 |
|         | 1.165830994                                                                                                                                                                                | 1.760979754 | 1.091350818 | 1.507395142 | 1           | 0.722174586 |
|         | 0.725456038                                                                                                                                                                                | 0.604188178 | 1           | 0.945752871 | 0.774402023 | 0.594110169 |
|         | 0.937383621                                                                                                                                                                                | 0.620226544 | 0.522747531 |             |             |             |
| YOR201C | YOR201C::PET56::Ribose methyltransferase for mitochondrial 21S rRNA                                                                                                                        |             |             |             |             |             |
| 1       | 0.907516549                                                                                                                                                                                | 1.000865927 | 1.035183054 | 1.062765385 | 1           | 1.049555017 |
|         | 1.037443099                                                                                                                                                                                | 1.085222807 | 1           | 1.007811113 | 0.813390528 | 0.844949417 |
|         | 0.888752013                                                                                                                                                                                | 1           | 0.843705867 | 0.770391863 | 0.681701432 | 1.176897737 |
|         | 1.044319775                                                                                                                                                                                | 1.159880064 | 0.748596409 | 0.899681594 | 1           | 0.774670524 |
|         | 0.857292855                                                                                                                                                                                | 0.855115159 | 0.825506768 | 0.89770995  | 1           | 0.938978522 |
|         | 0.87640416                                                                                                                                                                                 | 0.862741573 | 0.736682377 | 0.93284307  | 1           | 0.846317103 |
|         | 0.686987499                                                                                                                                                                                | 0.894755971 | 0.702489438 | 1.133014142 |             |             |
| YFL050C | YFL050C::ALR2::aluminium resistance                                                                                                                                                        |             |             |             |             |             |
|         | 0.962148965                                                                                                                                                                                | 0.722131293 | 1           | 1.245273585 | 1.285658567 |             |
|         | 0.992687088                                                                                                                                                                                | 1           | 1.225459011 | 0.68912516  | 1.186729912 | 1           |
|         | 1.097768873                                                                                                                                                                                | 0.910312357 | 1.009860708 | 1           | 0.866795316 |             |
|         | 0.814107907                                                                                                                                                                                | 0.665016623 | 1           | 0.793300611 | 0.74845624  | 0.932578434 |
|         | 0.879017081                                                                                                                                                                                | 1.046327476 | 1           | 0.688710271 | 0.663951842 | 0.723246581 |
|         | 0.902270952                                                                                                                                                                                | 1           | 0.938520744 | 0.960990768 | 1.100159958 | 0.855924596 |
|         | 0.983535354                                                                                                                                                                                | 0.693494204 |             |             |             |             |
| YDL194W | YDL194W::SNF3::glucose sensor                                                                                                                                                              |             |             |             |             |             |
| 1       | 1.641159641                                                                                                                                                                                | 1.175755439 | 1           | 1.521733784 | 1.6551008   | 1.352621548 |
|         | 1.313323743                                                                                                                                                                                | 1           | 1.793139163 | 1.490425336 | 1.390408577 | 1.600974102 |
|         |                                                                                                                                                                                            | 0.737948577 |             | 0.459845977 |             | 0.482687502 |
|         | 1.166099209                                                                                                                                                                                | 1.233178251 | 1.328943126 | 1.528344312 | 1.22072804  | 1           |
|         | 0.962942427                                                                                                                                                                                | 0.72152144  | 0.987129409 | 0.898998983 | 0.612055947 | 1           |
|         | 1.106976395                                                                                                                                                                                | 0.699917739 | 1.016848523 | 0.680645544 | 0.987077905 | 0.645334878 |
| YOR215C | YOR215C::YOR215C::molecular_function unknown                                                                                                                                               |             |             |             |             |             |
| 1       | 1.200633318                                                                                                                                                                                | 1.101129639 | 1.631603049 | 1           | 0.88112918  | 1.090308284 |
|         | 1.424885638                                                                                                                                                                                | 1           | 0.754107313 | 1.525675555 | 2.154460723 | 1.328673143 |
|         | 2.022003431                                                                                                                                                                                | 2.487969075 |             | 2.808063131 | 1           | 2.47450293  |
|         | 4.454199774                                                                                                                                                                                | 3.069824142 | 1           | 1.060338702 | 1.49010835  | 1.019892427 |
|         | 0.82566305                                                                                                                                                                                 | 1.154540961 | 1           | 1.027532658 | 1.488052888 | 1.637854087 |
|         | 1.592838735                                                                                                                                                                                | 2.187134792 | 1           | 1.242507934 | 1.77643964  | 1.511774635 |
|         | 1.972423675                                                                                                                                                                                | 2.239439612 | 1.553357019 |             |             |             |
| YFL052W | YFL052W::YFL052W::molecular_function unknown                                                                                                                                               |             |             |             |             |             |
| 1       | 1.296810802                                                                                                                                                                                | 0.92321346  | 1           | 1.275357866 | 1.298783415 |             |
|         | 1.109133595                                                                                                                                                                                | 1           | 1.135712259 | 1.100967417 | 1.340416674 | 1.000677831 |
|         | 0.655668738                                                                                                                                                                                | 0.443495856 | 1.12941658  | 0.900784935 | 1           | 0.732401021 |
|         | 3.36936702                                                                                                                                                                                 | 0.499454748 | 1           |             | 0.989139705 | 1.127624852 |
|         | 0.954882057                                                                                                                                                                                | 1           |             | 1.634297509 | 2.343218934 | 1           |
|         | 0.901163035                                                                                                                                                                                | 0.636430939 | 1.321431257 | 0.491490923 |             | 0.656718    |
| YDL196w | YDL196w::YDL196W::molecular_function unknown                                                                                                                                               |             |             |             |             |             |
| 1       | 1.090192377                                                                                                                                                                                | 1.007359144 |             | 0.926206903 | 1.001724385 | 1.197781899 |
|         | 1.007328167                                                                                                                                                                                |             | 0.948832385 | 1.104256579 | 0.843704655 | 1.088635757 |
|         | 0.70362128                                                                                                                                                                                 | 0.445425089 |             | 1           | 1.600304498 | 0.914596693 |
|         |                                                                                                                                                                                            |             |             | 0.987491852 |             |             |
|         | 1                                                                                                                                                                                          |             |             | 1.571971621 | 0.711006668 |             |
| YOR217W | YOR217W::RFC1::RFC is a DNA binding protein and ATPase that acts as a processivity factor for DNA polymerases delta and epsilon and loads proliferating cell nuclear antigen (PCNA) on DNA |             |             |             |             |             |
| 1       | 0.937800019                                                                                                                                                                                | 0.964143185 | 1.132871721 | 1           | 1.041789802 | 0.842526505 |
|         | 0.869451093                                                                                                                                                                                | 1           | 0.922137654 | 0.768935064 | 0.647152712 | 0.938633833 |
|         | 0.685216311                                                                                                                                                                                | 0.34782137  | 0.515719939 | 0.641465953 | 1           | 0.749945268 |
|         | 0.859993051                                                                                                                                                                                | 0.680856949 | 0.729737061 |             | 0.963224263 | 0.915798999 |
|         | 0.892117874                                                                                                                                                                                | 1.046149841 | 1.005672471 | 1           | 1.01653057  | 1.038657994 |

|         |                                                                                                                                      |             |             |             |             |             |             |
|---------|--------------------------------------------------------------------------------------------------------------------------------------|-------------|-------------|-------------|-------------|-------------|-------------|
|         | 1.058132285                                                                                                                          | 0.97793987  | 0.712231828 | 1           | 1.017029356 | 0.844807586 |             |
|         | 0.876581405                                                                                                                          | 0.921807335 | 0.702359696 |             |             |             |             |
| YFL054C | YFL054C::YFL054C::molecular_function unknown                                                                                         |             |             |             |             | 1           |             |
|         | 1.060654928                                                                                                                          | 1.301461988 | 0.807080398 | 1           | 1.204313177 | 1.413032145 |             |
|         | 1.114350171                                                                                                                          | 0.99703281  | 1           | 1.392024536 | 1.479327812 | 1.530014993 |             |
|         | 1.139490702                                                                                                                          | 1           | 2.787112337 | 2.014396082 | 2.922704821 | 2.585808201 |             |
|         | 2.02222264                                                                                                                           | 1.518559266 | 2.235287702 | 1.339899344 | 1           | 1.034443705 |             |
|         | 1.279191462                                                                                                                          | 1.567364858 | 1.122171108 | 1.059678319 | 1           | 1.000972826 |             |
|         | 0.869544777                                                                                                                          | 1.484942774 | 1.329683593 | 1.122796157 | 1           | 1.10069292  |             |
|         | 0.85857166                                                                                                                           | 1.090626756 | 0.921346901 |             |             |             |             |
| YDL198C | YDL198C::YHM1::high copy suppressor of abf2 lacking the HMG1-like mitochondrial HM protein; putative mitochondrial carrier protein 1 |             |             |             |             |             |             |
|         | 1.829223981                                                                                                                          | 0.857291971 | 0.734349772 | 1           | 1.025118297 | 0.981423772 |             |
|         | 0.942203087                                                                                                                          | 0.76505354  | 1           | 2.781336925 | 2.30700738  | 0.766002526 |             |
|         | 0.406813258                                                                                                                          | 1           | 1.408596649 | 0.873634523 | 0.494834441 | 0.59879724  |             |
|         | 1.774677172                                                                                                                          | 1.395433158 | 0.815664058 | 0.5711489   | 1           | 1.138978156 |             |
|         | 0.98093125                                                                                                                           | 0.982630635 | 1.002706653 | 0.768534846 | 1           | 0.980452769 |             |
|         | 1.168285158                                                                                                                          | 0.79931255  | 0.517701097 | 1.026041378 | 1           | 1.759366883 |             |
|         | 1.651894815                                                                                                                          | 1.22371647  | 1.328297728 | 1.282996531 | 1.295923537 |             |             |
| YOR219C | YOR219C::STE13::dipeptidyl aminopeptidase 1                                                                                          |             |             |             |             | 0.774636378 |             |
|         | 0.859963368                                                                                                                          | 1.078838646 | 0.949956809 | 1           | 1.03230682  | 1.181001398 |             |
|         | 0.801895348                                                                                                                          | 0.748735242 | 1           | 1.107803525 | 1.115874538 | 0.713680436 |             |
|         | 0.974288468                                                                                                                          | 1.316032456 | 0.830425515 | 1.290011295 | 0.860937156 | 1           |             |
|         | 1.170326376                                                                                                                          | 1.229379971 | 1.173332329 | 0.94756315  | 1           | 1.038163126 |             |
|         | 1.141166431                                                                                                                          | 1.075051696 | 0.962229478 | 0.939852145 | 1           | 1.152459455 |             |
|         | 0.970564483                                                                                                                          | 1.347299097 | 1.164349521 | 0.594524373 | 1           | 1.102730033 |             |
|         | 1.032441348                                                                                                                          | 1.076237103 | 0.745726139 | 1.046076107 | 0.998211347 |             |             |
| YFL056C | YFL056C::AAD6::high degree of similarity with the AAD of P. chrysosporium                                                            |             |             |             |             |             |             |
|         | 1                                                                                                                                    | 0.990286953 | 0.839281533 | 0.953903902 | 0.669411306 | 1           |             |
|         | 0.979008402                                                                                                                          | 0.999035642 | 0.987983297 | 1.047614319 | 1           | 3.599887283 |             |
|         | 4.542752686                                                                                                                          | 1.788363946 | 1.015825821 | 1           | 3.414319473 | 3.589919459 |             |
|         | 4.770577481                                                                                                                          | 2.750350448 | 1           | 3.366475027 | 5.364319968 | 3.891355679 |             |
|         | 1.729043329                                                                                                                          | 1           | 2.3276664   | 4.728003878 | 8.191272671 | 1.691897102 |             |
|         | 1.045497113                                                                                                                          | 1           | 4.151655735 | 7.682189482 | 12.4126079  | 13.75997574 |             |
|         | 2.561692183                                                                                                                          | 1           | 5.105394935 | 5.890697435 | 6.097716353 | 0.716651484 |             |
|         | 1.151434954                                                                                                                          | 1.217993012 |             |             |             |             |             |
| YDL200C | YDL200C::MGT1::6-O-methylguanine-DNA methylase 1                                                                                     |             |             |             |             | 1.134887505 |             |
|         | 1.616897598                                                                                                                          | 1.391489598 | 1.552483185 | 1           | 1.132846263 | 1.300424193 |             |
|         | 1.955277687                                                                                                                          | 1           | 1.169235176 | 1.549346553 | 2.442462652 | 1.907983237 |             |
|         | 0.950506483                                                                                                                          | 0.968681565 | 1           | 1.529979684 | 2.397758067 |             |             |
|         | 1.840944421                                                                                                                          | 1.355969724 | 1           | 0.768808777 | 0.918968259 | 0.805880738 |             |
|         | 0.717735504                                                                                                                          | 0.930590357 | 1           | 1.031625004 | 1.403712815 | 1.551809843 |             |
|         | 1.936799268                                                                                                                          | 2.009229071 | 1           | 0.809241299 | 0.973092181 | 1.077280255 |             |
|         | 1.283635587                                                                                                                          |             |             |             |             |             |             |
| YOR221C | YOR221C::MCT1::malonyl-CoA:ACP transferase                                                                                           |             |             |             |             | 1           | 0.923337998 |
|         | 0.799945431                                                                                                                          | 0.887703595 | 0.770451681 | 1           | 0.920458293 | 0.939309444 |             |
|         | 0.884976842                                                                                                                          | 0.792282849 | 1           | 0.842716341 | 0.845205082 | 0.693782479 |             |
|         | 0.894654617                                                                                                                          | 1           | 0.962504152 | 0.495495063 | 0.727324391 | 1.043055997 |             |
|         | 1.207910269                                                                                                                          | 1.006410476 | 0.982248589 | 0.921159422 |             |             |             |
|         | 1                                                                                                                                    | 1.266655832 | 1.703586605 | 1.550922357 | 1.237509368 | 1.264865733 |             |
|         | 1.124833733                                                                                                                          |             |             | -12.258736  |             |             |             |
| YOR221C | YOR221C::MCT1::malonyl-CoA:ACP transferase                                                                                           |             |             |             |             | 1           | 1.703352808 |
|         | 1.369940767                                                                                                                          | 1.495814373 | 2.209110013 | 1           | 1.634733926 | 1.593884288 |             |
|         | 1.66009309                                                                                                                           | 1           | 1.607848888 | 2.11039645  | 2.040726608 |             |             |
|         |                                                                                                                                      |             |             | 1           | 1.151307182 | 1.176192181 |             |
|         | 1.737471496                                                                                                                          | 1.569687528 | 1.42522167  | 1           | 0.925531051 | 1.174126599 |             |



1.013160464 0.906349645 0.677195301 1 0.999217382 1.15041716  
 1.053169952 1.052505198 1.081614056 0.893136463  
 YFL058W YFL058W::THI5::proposed biosynthetic enzyme involved in pyrimidine  
 biosynthesis pathway above the hydroxymethyl-pyrimidine precursor leading to the  
 thiaminemoiety 1 1.223046629 1 0.887853937  
 1.008430801 1.415466256 1 0.934557849 1.054683991 1.688068155  
 1.468823624 1 0.571865534 0.591092365 0.904629625 1.775840877 1  
 1.704277965 7.437291627 7.247806543 3.477734886 1 0.700802396  
 0.852462063 1.263605927 1 2.392868282  
 2.976974947 1 1.020259852 1.019308861 1.757717917 0.978458333  
 0.918529598  
 YDL202w YDL202w::MRPL11::Mitochondrial ribosomal protein MRPL11 (YmL11)  
 0.784154168

1

0.895126237 0.731736126 0.770833234 0.718204612 0.875588325 1  
 1.021217321 1.024397099 0.814993245 0.885900271 1.238411114 1  
 0.930254573 0.83172764 0.863586883 1.216818215 0.924658939  
 YFL060C "YFL060C::SNO3::SNZ3 proximal ORF, stationary phase induced gene  
 family" 1 0.899066808 0.901979018 0.92575953 1.044899044 1  
 0.932363982 1.062788258 1.271469638 1.223593643 1 1.269989925  
 3.091424953 7.78199908 4.58788384 1 1.011743475 0.871998498  
 1.228842489 1.997584389 1 1.658861234 2.077689639 1.586175243  
 1.53831176 1 0.86079761 0.686306863 0.884417415 0.918691144  
 1.019288406 1 1.462219179 1  
 0.959625593 0.24128922 2.53989136 1.692581164  
 YDL204w YDL204w::YDL204W::molecular\_function unknown 1 0.810841643  
 1.827829853 2.641831646 1.966396222 1 1.448862248 2.776613275  
 2.567585978 2.646680461 1 1.419998381 3.355376614 9.711622347  
 2.417029906 1 13.3590968 30.23514482 7.352142925 1  
 2.99459676 5.064727721 11.99531577 3.525712975 1 1.320672101  
 2.710563457 2.537133351 1.026571897 0.965403302 1 1.070144718  
 1.725389837 4.513838622 1.93910996 1.441437095 1 1.953177464  
 2.070022401 1.739191399 1.300132813 3.371809255 1.157574951  
 YFR006W YFR006W::YFR006W::molecular\_function unknown 1 0.936929418  
 1.06213401 1.101342134 1.120779306 1 1.050336971 1.076454878  
 1.140299633 1.160485771 1 0.76748104 0.948913325 0.888049446  
 0.871520369 1 1.385495632 0.821289375 1.12313084 0.913027102 1  
 0.975374796 0.930082175 0.880426045 0.470047082 1 0.96078273  
 0.917310459 1.082262809 1.041334038 0.959980571 1 1.136222785  
 1.053320899 0.943101498 1.032928911 0.899129553 1 1.170860085  
 1.124151441 1.029435757 1.081637307 1.300463622 1.03761439  
 YDL218w YDL218w::YDL218W::molecular\_function unknown 1 1.05230695  
 0.91414075 0.806508021 1 0.907784811 1.299931878 1  
 1.068582682 1.026854527 1.041901357 0.680720489 1 0.762475052  
 1.862452028 1.497112645 1 0.709302343 3.544047442 2.228045161  
 1.039127458 1 0.991090442 0.935778082 1.20934101 1.088181393  
 0.980277736 1 0.823087249 1.067557505 1.42599001 1.150088025  
 1.007668729 1 0.609655972 0.73195043 0.917837799 0.364427266  
 0.851133217 0.749534149  
 YFR008W YFR008W::YFR008W::molecular\_function unknown 1  
 1.016984753 0.970905507 0.930039097 1 1.009888389 0.934961433  
 0.983088539 1.075867702 1 1.083523064 1.150554593 1.228946935  
 0.980281254 1 1.116038938 1.065803342 1.10969006 1.387608039 1  
 1.1391785 1.862028705 1.821365354 0.930618545 1 0.974774278  
 0.947738861 0.796559993 0.606260469 1.321311696 1 1.301491876  
 1.210903193 0.974326636 1.021731792 1.152919961 0.653358686  
 0.634847225 0.565726851 0.999964678 1.198729219

YDL220C "YDL220C::CDC13::Regulator of telomere replication. Required for G2/M transition in mitosis, synaptonemal complexes, recombination, meiosis I, meiosis II, and spores. Dispensable for premeiotic DNA synthesis."

1.063831996 0.925859061 1.111437144 0.921209814 0.989164742  
0.932526293 0.934225614 1.035637921 0.982619114 1.013146703  
1.161080944 1 0.879161072 1.66132262 1.35596726 0.760375826 1  
0.677844281 0.59373794 0.308329164 0.463591773 1 1.206967639  
1.199682715 1.285688099 1.468587357 1.618430905 1 0.765588151  
0.949834422 0.934164885 0.649064481 1 0.698111067 0.541876987  
0.69438373 0.507724425 0.500988617 0.575284973

YFR010W YFR010W::UBP6::deubiquitinating enzyme (putative) 1  
0.843017359 1.051698022 1.14387982 1.139839114 1 0.987982393  
1.130219335 1.180106274 1.061627946 1 0.934632731 1.367311336  
1.262908331 0.988855011 1 1.459169374 1.742265639 1.78727199  
1.417308903 1 1.139131396 1.071114184 1.392152956 0.950654617 1  
0.939262639 1.186222152 0.992438525 0.72384712 0.803675621 1  
1.306568955 1.960098154 1.217330654 1.00514064 1.069750919 1  
1.769264261 1.912880568 1.072152729 0.987256961 1.40183429 1.188221762

YDL222c YDL222c::YDL222C::molecular\_function unknown 1 0.992613103  
1.116983121 1.09124449 0.978135474 1 1.104698928 1.218192745  
1.291483788 1.451362106 1 0.860011709 1.386263999 3.585499386  
1.298626857 1 0.685929639 0.720825326 1.054465978 0.825784192 1  
1.091939421 1.417301582 1.254659563 1 1.130317999 0.926415322  
1.116991738 1.136677961 1.028141079 1 0.67634459 0.887778765  
0.690074788 0.706515119 0.860664177 1 0.655930393 0.96183147  
0.755798736 0.535792017 0.914151482

YDL224c YDL224c::WHI4::whi (Wee) mutants give small cell size 1  
0.700136263 0.534304131 0.535614906 0.368698755 1 0.661027343  
0.706216543 0.360724581 0.385512818 1 0.916438604 0.683715622  
0.460240194 0.493536292 1 0.574791701 0.589928513 0.904046394  
0.534251208 1 0.689532735 0.637055326 0.658090903 1  
0.698507193 0.679856545 0.88282322 0.885603792 0.808616243 1  
0.69537529 0.527026179 0.571613835 0.608995567 0.35489281 1  
0.530822225 0.71362552 0.72465956 0.529566518 0.609611175 0.743404756

YPR008W YPR008W::HAA1::Homolog of Ace1 Activator 1 0.749876358  
0.867657101 0.897146483 1 0.992478568 0.961196674 0.728104756  
0.841618236 1 1.041103544 0.945713608 0.449989148 0.805749478 1  
0.715746626 0.834036928 0.608971898 1 1.180722719  
1.210431608 1 0.959673699 1.173994951 0.911407793 1.021690017  
0.889498853 1 1.014915791 0.8005237 1.125166309 0.954781858  
0.850442665 1 1.156312947 0.923088909 1.118935857 0.688871774  
1.257790462 0.706628552

YPR010C YPR010C::RPA135::135 kDa subunit of RNA polymerase I 1  
0.829479154 0.630459498 0.859536329 0.948439978 1 0.912535598  
0.728040185 0.838466869 0.963822106 1 0.874518151 0.690503761  
0.923626523 1.099461977 1 0.973883835 2.091547757 1.72900658  
1.211205745 1 1.219194292 2.898616972 2.384640266 1.485728336 1  
0.866283376 0.878879996 0.94261903 0.913705721 1 0.739612811  
0.57750458 0.517505459 0.744730849 0.770624732 1 0.679723764  
0.532701915 0.649167269 0.516859299 0.55492633 1.105037457

YPR012W YPR012W::YPR012W::molecular\_function unknown 1 1.298842452  
1.460200977 1.368429302 1 0.894952573 1.077312056 1.449314317  
1.392315622 1 1.135517813 1.189949522 1.832321538 1.437134508 1  
0.932900429 0.861192659 1.383205236 1.625762626 0.254952569  
0.71230553 0.54155927 0.215252531 1 0.818492997 0.74784987  
0.62996589 0.774699892 0.748418696 1 0.808760727

0.927181263 1.394334218 1 0.768759198 0.880765687 1.288871553  
 0.25709929 1.314937825 1.397495866  
 YPR014C YPR014C::YPR014C::molecular\_function unknown 0.817574537  
 0.895110963 0.843871267 0.814819917 1.002822752 1.067933872  
 1.133708817 1.141733536 1.257625524 1.257021914  
 0.413237909 0.377689834 0.492764953 0.514361844 1 1.052835796  
 1.71824284 1.60801218 0.719170361 1 1.091037405 1.208582199  
 1.073431768 1.089254353 1.132310885 1 0.770765469 0.777923776  
 0.943759367 1.043479009 1 0.987603759 0.945929921 -0.114959347  
 1.309633445  
 YPR030W YPR030W::CSR2::chs5 spa2 rescue; overexpression rescues the  
 lethality of chs5 spa2 at 37 degrees 1.026893347 0.791478502  
 0.818418109 0.989642207 1.079040617  
 0.920213795 1.249189986 1.01565527 0.733034357  
 1 0.943355515 1.11641532 1.070838257  
 1.122813789 1.038426155 0.867263982 0.8847779 0.878781059  
 0.842422608 0.957003 1 0.98746713 1.042021635 1.055541717  
 0.303478136 1.170371048 1.633914433  
 YPR032W YPR032W::SRO7::Suppressor of rho3 1 0.715607486 0.772176728  
 1.005596694 0.474907341 1 0.961007278 0.650826884 1  
 0.985533403 0.93875578 0.585287946 1.095547279 1 0.575544216  
 0.673082464 0.601672344 0.579755161 0.377958021 0.530655388  
 0.614230707 1 0.977083358 0.988978588 1.173301801 0.946245005 1  
 0.971976083 0.54276148 0.809770588 0.996223433 0.460768269 1  
 0.739813864 0.564121255 0.941015691 0.378336685 0.721844263 0.673354851  
 YPR034W YPR034W::ARP7::involved in transcriptional regulation 1  
 0.779832153 0.923482914 0.974426383 0.519092597 1 0.884705927  
 0.87002083 0.833751345 0.687402307 1 0.73793357 0.963308852  
 0.616756644 1.019781443 1 0.625796553 0.506790431 0.443206205  
 0.681414663 1.137391157 0.634030142 1.215176651 1.030603047 1  
 0.780497567 0.774070178 1.102063843 1.008763962 1.014843318 1  
 0.879402539 0.937942761 1.069370166 1.071022167 0.740380202 1  
 0.707378554 0.615495802 1.134195408 0.547516088 0.749407487 0.724141067  
 YPR036W YPR036W::VMA13::vacuolar ATPase V1 domain subunit H (54 kDa) 1  
 1.063826229 0.787663249 1.208225044 0.902434961 1 1.162750172  
 1.115880901 0.964496772 1.126707525 1 1.064899516 1.108148293  
 0.930136712 1.058967421 1 1.289730184 1.321104289 1.140795682  
 1.003829224 1 1.033540899 0.608431293 0.912182802 1.272508728 1  
 0.926118901 1.028358759 1.241215929 1.047113434 1 1.140728653  
 1.189281667 1.656923474 1.328110568 0.788562954 1 1.041182257  
 1.056264191 1.096526483 0.59747489 0.929014183 0.973693878  
 YPR038W YPR038W::YPR038W::molecular\_function unknown 1 1.115878423  
 1.107234259 0.905287422 1.061421852 1 0.938866244 0.834919028  
 1.052447607 1.176919363 1 1.103994832 1.06827128 1.465298578  
 1.1825865 1 0.511318648 0.647259273 0.728356913 1.015676986 1  
 0.875240048 1.268856518 1.134339143 0.764153687 1  
 1.436596149 1.313855785 1.400539333 1 1.07753175 1.349857355  
 1.272634713 1.771283514 1.341589273 1 0.929027221 1.059622516  
 1.255959159 0.51552267 1.088807939 1.154072396  
 YOR223W YOR223W::YOR223W::molecular\_function unknown 1 1.516458746  
 1.560097911 1.412805686 1.651005481 1 1.507241175 1.393676894  
 1.480297191 1.918199319 1 1.79273832 3.553555922 5.763061907  
 3.526036331 1 1.253736254 1.254341712 1.450693259 1.558803896 1  
 1.171305393 0.990139506 1 1.186557356 1.304254556  
 1.068419991 1.009762101 1 0.872307361 0.821450463 1.015116162  
 0.971522676 0.765894345 1 1.133554415 1.008043502 0.967795224  
 0.834219878 1.06189595 0.924658939

YPR040W YPR040W::SDF1::SDF1 the first observed null phenotype was  
Sporulation DeFiciency 1 0.824127273 0.746875807 0.833230684 0.676701691 1  
0.861397282 0.828687727 0.79636713 0.82617373 1 0.91671805  
0.935318354 0.899370196 0.933372297 1.233198744 0.954681788  
1.269569024 1.452315736 1 1.057250852 0.866144169 1.175077356  
1.204521221 0.974704673 0.838665084 0.941562074 1  
0.994138748 1.178242782 1.10156411 0.975823491 1  
1.053455658 1.013562945 0.163554958 0.803143189 1.105037457  
YOR225W YOR225W::YOR225W::molecular\_function unknown 1 1.562796024  
2.080544449 1.158086198 2.522741811 1 1.230691872 1.243230454  
2.122163776 1.9504556 1 5.319383592 4.175680677 2.536187545  
2.041364726 1 7.818564874 3.52899421 2.057487007 3.327786939 1  
10.13294075 12.83426401 4.162310192 1.324950772 1 5.010231596  
6.506905044 3.864761917 0.729302551 0.947729844 1 4.545550069  
7.863862066 4.724828398 3.097921572 2.635410094 1 4.887008229  
8.26993875 1.562739201 2.086599306 1.546476095 3.030534634  
YOR239W YOR239W::ABP140::actin filament binding protein 1  
0.624004349 1.070263254 0.706122234 1.41702868 1 0.720989194  
0.687852673 0.936823335 1.012082381 1 0.811140365 0.778513227  
0.92989507 0.895119541 1 0.705982942 0.349416705 0.334892853  
0.356630544 1 0.788578839 0.770378696 1.035577743 0.506956818 1  
1.073304578 1.218630374 0.950166107 0.930715541 0.899895027 1  
1.547783191 1.4437615 1.319797517 2.408517891 1.335869136 1  
0.546829942 0.873892528 1.044369079 0.979786251 0.665579544 0.806449707  
YOR241W YOR241W::MET7::METThionine requiring 1 0.775070217 0.791872343  
0.945303575 1 0.863072973 0.891047896 0.841780991 0.803701579 1  
0.758920915 0.71078676 0.557293659 0.907647887 1.235060152  
0.832886003 1.141536255 1.091987447 1 0.655383406 0.768809015  
0.650466389 0.743238054 1 0.89244354 0.835424057 0.891023776  
1.128768517 1.0134468 1 0.945048582 0.701530762 0.519148847  
0.841155804 0.640181301 1 0.722918337 0.718200227 0.832508614  
0.991086704 0.716825182 0.922907714  
YOR243C YOR243C::PUS7::Pseudouridine Synthase 1 1.142504256  
1.081038971 1.041294193 1.16492827 1 1.034915195 1.029065459  
1.150459201 0.972703417 1 0.938351243 0.806573133 0.849044344 1  
0.857883802 0.550992602 0.410069932 0.507070581 1 1.179692734  
0.786478508 1 0.884689529 0.760715934 0.820485348  
0.997749323 1.085493299 1 1.040649269 0.624722883 0.539928301  
0.86700937 0.867031806 1 0.716887854 0.639767427 0.810890143  
0.998792558 0.501809961 0.816081552  
YFR012W YFR012W::YFR012W::molecular\_function unknown  
1.072020844 1.044084224  
1.224715285 1 0.745407078 1 0.744420886  
0.265891651 0.772633681 1.110348251 1.15473999 1  
0.625242469 1.090142089 0.60855402 1 0.778591144  
1.043427684 0.550228126 1.07783301 0.610309951  
YOR245C YOR245C::DGA1::Diacylglycerol Acyltransferase 1 1.025144475  
0.985839842 1.018072561 1.00211771 1 1.013196853 0.961387454  
1.081936929 0.989266328 1 1.020514404 1.174178172 1.252328117  
1.342802444 1 1.823058209 1.662576109 1.98467161 1  
1.318804461 1.311234556 1.672111354 1.054799156 1 0.923059341  
1.059237966 1.190294395 0.960859631 1.001439436 1 1.052404572  
1.075050638 0.841568599 1.084926439 0.98126749 1 1.066276868  
1.073375187 1.036205628 1.270947225 0.957663614 1.14881872  
YFR014C YFR014C::CMK1::Calmodulin-dependent protein kinase 1  
0.826770143 1.213795111 1.070153723 1.080455715 1 0.999604028  
1.1706969 1.248061001 0.950316836 1 0.908741241 1.188373796

1.475372483 0.871233534 1 1.593752145 0.692083495 1.66724392  
1.613614396 1 1.714689682 2.897118248 2.150165156 1.303466841 1  
1.199128919 1.606027216 1.606549381 1.069879692 1.090669051 1  
1.267821114 1.203866925 1.345024476 1.076562854 1.251098752 1  
1.53953291 1.25784732 1.170665442 1.157700794 1.852129846 1.119047469  
YDL226C YDL226C::GCS1::Zn-finger-containing protein that functions as ADP-  
ribosylation factor GTPase-activating protein and is involved in regulating  
vesicle transport 1 0.73375325 0.70296517 0.641007834 0.495343887 1  
0.774772147 0.757603055 0.631739078 1 0.770730973 0.800730631  
0.732669524 0.635978764 1 1.086240397 0.837814067 1.175329418 1  
1.571413962 1.188576011 1.295426964 1.200877215 1 0.965910541  
0.985056098 0.944795132 0.878598376 0.94929088 1 0.893766716  
1.131810083 1.057398029 0.826672917 0.824807414 1 0.998348837  
1.047439076 0.905239071 0.725462715 0.772662409 0.940420177  
YOR247W YOR247W::SRL1::Suppressor of Rad53 null Lethality 1  
1.408191735 1.030431643 0.713341543 0.651970373 1 1.245269078  
1.02118984 0.502022784 0.645862972 1 1.05805691 0.803164419  
0.830968543 0.52935591 1 1.734056631 1.367393021 1.499335549  
1.126702986 1 0.351575478 0.436697471 0.229221103 0.341502808 1  
1.11705878 0.768627625 0.843724066 1.151267379 0.518340678 1  
0.447077174 0.542755584 0.390654193 0.365177654 0.328944543 1  
0.824243266 0.833321193 0.926827774 0.979938041 0.903787784 0.778429735  
YFR016C YFR016C::YFR016C::molecular\_function unknown 1 1.018998352  
1.389448021 1.297819745 1.523043047 1 1.213010323 1.286224782  
1 1.069369185 1.466478461 1.353703186 1 0.865845945  
0.951317725 0.622571658 0.678709366 1.208794706 1  
0.938042482 1.094777921 1.263428468 0.993862273 0.887606446 1  
1.095010019 1.327416466 1.321962877 2.261967224 1.350137291 1  
1.022698792 1.455650871 1.669420131 1.220279162 1.254531133 0.853733421  
YDL228c YDL228c::YDL228C::molecular\_function unknown 1 1.426775114  
1.049178593 0.681733837 1.217663302 1 0.984921244 0.762181499  
0.878136114 1.406527122 1 1.127993471 0.672502985 0.530419857  
0.840922085 1 0.78252205 0.837469616 0.2370506 0.576014007 1  
0.843188872 0.715797062 0.302958742 0.290324436 1 1.682764663  
0.998833943 1.414225534 1.296159691 1.030888111 1 1.394651378  
1.676222569 1.222205956 0.505814766 1.834921287 1 0.972955534  
1.549911203 0.745738432 1.321198538 0.845270444 0.789812857  
YOR249C YOR249C::APC5::subunit of the Anaphase Promoting Complex; all known  
APC subunits co-immunoprecipitate with epitope-tagged Apc5 1 0.812898188  
0.95801762 0.99912655 0.950371022 1 0.878394116 0.925369227  
0.840644131 1 0.909097232 0.844116923 0.765667052 1.021933893 1  
0.893891766 0.808240983 0.821520681 1.195228569 1 1.163252116  
1.909420581 1.445157089 1 0.925805146 0.823171455 0.914866262  
1.020503314 1.19150769 1 1.035675916 0.751204275 0.757654756  
1.053264499 0.664356553 1 0.912401263 0.680718978 0.934690247  
0.929289502 0.765637615 0.854609034  
YFR030W YFR030W::MET10::subunit of assimilatory sulfite reductase 1  
1.280409122 1.02590641 1.137388143 0.467102217 1 1.025121427  
1.264379668 0.579836948 0.560356302 1 1.734577297 1.747788143  
0.53276624 0.517978209 1 1.21641767 0.481563075 0.707578629  
0.464624437 1 1.108956446 0.472359964 0.498525424 1  
0.942711293 0.80687024 0.832850683 1.285985445 0.827539544 1  
1.432918701 0.522625275 0.490758847 0.551614593 0.531898791 1  
1.429515082 0.780709254 0.63998374 0.59918552 0.686489198  
YDL242w YDL242w::YDL242W::molecular\_function unknown 1.05398168  
0.769840967 1.281395347 0.881072077 0.949210727 1.083004654  
0.872274299 1.399738768 1.10002564 0.934852814 1.032833344 1

1.404800783 1.771812494 0.930267295 1 1.050596976  
0.449577904 1 1.099997878 0.930239751 1.119333972 1.309208406  
1.252860423 1 0.551337511 0.904174965 0.843343288 0.586931791 1  
1.318741729 0.771449568 0.963980226 0.166712834 1.247687784 0.79331536  
YOR263C YOR263C::YOR263C::molecular\_function unknown 1 0.71554498  
0.790431715 1.171141641 0.801393733 1 1.071977658 0.928596634  
0.882709748 1 0.826331403 1.019016444 0.647509723 1.116114789 1  
0.420153246 0.42317481 0.627381448 0.836012319 1 0.932671044  
1.203677996 0.85946597 1 0.759453002 0.836728819 1.200420439  
0.95321784 1.204692161 1 0.737777744 0.781337194 0.721414683  
0.790989143 1 0.888697252 0.633873518 0.9886099 0.866863551  
0.937035839 0.885255897  
YFR031C YFR031C::SMC2::Chromosome segregation and condensation 1  
1.556589037 1.593479315 1.759213872 1.661295504 1 1.476138442  
1.546213439 1 1.30249624 1.498929767 1.676932163 1.46541049 1  
2.503758464 2.47176647 1.934969252 1 1.230494864  
1 0.871843816 0.985942194 0.977708744 0.970322227 1.029094047 1  
0.862744494 0.929576184 1.239496647 1.031028413 0.618241256 1  
1.01571193 1.062709773 1.292940299 1.021243209 0.856360259  
YDL244w YDL244w::THI13::Product of gene unknown 1  
1.303682315 1 1.234899169 1.231245602 1  
1.314910618 1.52993903 0.994871565 1 1.80091455  
0.415285187 1 1.222114807 0.874080819 0.993320875  
1.081225665 0.825763014 1 0.762761106 1.03058035 1.180688109  
1.396510614 1 0.530500481 0.727444361 0.504006899 0.78380474  
0.639522577  
YOR265W YOR265W::RBL2::binds to beta-tubulin and may participate in  
microtubule morphogenesis 1 0.887497558 1.867426895 1.020865965  
2.313877233 1 1.014489256 1.134771723 1.725023664 1.724752537 1  
1.153243088 1.405657116 1.95481232 1.287800403 1 0.820572206  
0.566816532 0.583941141 1.572489352 1 1.816124521 2.382656284  
2.617359278 1.222555842 1 0.728126805 0.928603116 0.464371789  
0.573740253 0.917535583 1 1.564907557 2.179243105 1.610311998  
2.200790663 2.474268528 1 1.176897171 1.440952899 1.305419449  
2.237566994 1.600929959 1.501695189  
YFR033C YFR033C::QCR6::ubiquinol-cytochrome c oxidoreductase subunit 6 (17  
kDa) 1 0.946558498 1.593420504 1.048450523 1.364553391 1 1.122379435  
1.301641593 1.48734624 1.540821577 1 0.790536645 1.091670409  
1.896153127 1.03255052 1 1.417172801 0.90820742 1.310030987  
1.374894408 1 1.592844683 1.083628572 1.754932318 1.670610808 1  
0.613414897 0.50351817 0.376644489 0.511222232 0.802613503 1  
0.57623129 0.476840044 0.261547012 0.605252355 1.885469647 1  
0.720922098 0.581175297 0.881664893 1.838174349 2.584200236 1.170709299  
YDL246c YDL246c::YDL246C::molecular\_function unknown 1 2.501222258  
2.330371254 2.702313493 2.156619856 1 2.220316642 2.095257347  
2.640171796 1 1.467288687 2.86013551 1  
2.349815736 0.345757588  
0.779481295 0.893709385 0.760775499 0.820996157 1  
1 0.940838221 1.113552724 0.738011394 0.937457232  
YFR035C YFR035C::YFR035C::molecular\_function unknown 1 1.150001838  
1.287001172 0.783247479 1.593565754 1 0.914332618 0.961387489  
1.467332761 1.560607265 1 0.987698425 1.11067098 1.415729555  
1.486487584 1 0.900231432 0.473074447 0.628536773 1.128884137 1  
1.693377409 2.245017909 1.635656836 1.35170275 1.176640112  
1.174431697 0.931520563 0.986037396 1.003758752 1 0.842051519  
1.039457546 1.104404453 1.989108445 2.068727412 1 0.793014007  
0.945935545 1.166743034 1.081783824 1.351693435 1.252142274

YDL248w "YDL248w::COS7::Protein with strong similarity to other  
subtelomerically-encoded proteins such as Cos5p, Ybr302p, Cos3p, Cos1p, Cos4p,  
Cos8p, Cos6p, Cos9p" 1 1.274148576 0.968248762 1.140807568 1.227703836 1  
1.126909298 1.121871769 1.146317656 1 1.310992096 1.095719805  
1.588358665 1.034972137 1 1.498048863 1.35467508 1.348820432 1  
1.549179689 1.468980554 2.060792032 1.593189877 1 1.245965482  
1.165508745 1.110140871 1.371646824 1 1.023169171 0.916330351  
1.701986456 0.745865947 0.99250884 1 0.779433024 0.917275676  
0.733912683 0.875177586 0.825939027 1.137435598  
YFR037C "YFR037C::RSC8::Rsc8 is the eighth largest subunit of RSC, a  
fifteen-protein chromatin remodeling complex and related to the Swi/snf  
Complex." 1 0.702792702 0.872983031 0.918360529 0.743138121 1  
0.882907003 0.9075953 1.054162159 1.019698032 1 0.71515518  
0.803793442 0.828893753 0.903154585 1 0.820071419 0.720841595  
0.944163054 0.992254825 1 1.564751144 1.874341128 1.685632427  
1.582693991 1 0.945049382 0.898097271 0.55830914 0.826998149  
0.952739307 1 0.767911312 0.893690412 1.064787212 0.847122491  
0.94324603 1 0.910882085 0.87702093 1.064568698 0.977960092  
1.018284447 0.954430189  
YDR002W YDR002W::YRB1::Yeast Ran Binder #1; suppressor of FUS1; homolog of  
mouse HTF9a and human RanBP1 1 0.856369552 0.974114546 0.718094695  
1.510169407 1 0.733057455 0.696319446 1.067615648 1.082597333 1  
0.796433782 0.826027393 1.294811567 1 0.901003521 0.658352547  
0.492663 1.127554 1 2.058540071 1.56621594 1.506960933  
1.160271491 1 1.116363208 1.355250894 0.992472346 1.086042133  
1.168012979 1 1.164037821 1.853727132 1.497687805 1.152300502  
2.050038126 1 1.151900131 1.235151203 0.902747988 1.400869239  
1.177315423 1.434272122  
YFR039C YFR039C::YFR039C::molecular\_function unknown 1 1.107148096  
0.981241293 0.855154308 1.190781263 1 0.941513036 0.868257252  
1.251619211 1.082275196 1 1.122201061 0.932264973 0.7008853  
1.046670776 1 1.562397062 1.036774111 1.00111799 1.196140065 1  
1.135929755 1.180691335 1.001308479 0.930705106 1 1.149406024  
1.187843137 0.982218741 0.937085847 0.913979199 1 0.980365824  
1.262581946 1.188897478 0.901628382 1.407430783 1 1.115520838  
1.172336415 1.190452633 1.256084342 1.092657564 0.978071994  
YFR053C YFR053C::HXK1::Glucose phosphorylation 1 0.991066825  
1.650664848 1.896678061 1.420509993 1 1.625466809 2.286204396  
1.624716431 1.199871651 1 1.201649167 1.692742617 3.494116736  
1.060402404 1 7.400433527 6.553070045 9.482848653 4.293510597 1  
5.82373509 4.161803112 6.830580454 4.088785476 1 1.680944555  
2.115934926 2.253693019 1.126878745 1.561238865 1 1.629493408  
1.727072287 4.14653895 1.203564502 1.499167434 1 3.842469561  
2.77419252 1.695310286 2.219742067 8.498046457 1.539347006  
YDR004W "YDR004W::RAD57::Required for X-ray damage repair, meiotic  
recombination, wild-type levels of sporulation and viable spores"  
1.050287793 0.801727868 0.954896653 0.820376022 0.839034527  
0.762277114 1.037064777 0.842736769 0.891655425 0.918492892  
1.050455152 1  
0.859323253 0.77938942 1.000053745 1.13055672 0.917579207  
0.675987711 1.03812316 0.839334512 0.957886178 1.145851594 1  
0.829968512 1.32181139 0.933921654 0.611374741 1.047228275 0.746907259  
YDR018c YDR018c::YDR018C::molecular\_function unknown 1  
1.552944849 1 1.327812331 1 1.438592693  
2.089191369 1.39436454 1.391379479 1 1.711493098 3.080537395  
2.547258468 3.826779936 0.521546832 0.566937066 0.867464097  
0.358754234 1.063655231 1.075028352 0.827999943 0.935820802 1

|         |                                                                                                  |             |             |             |             |
|---------|--------------------------------------------------------------------------------------------------|-------------|-------------|-------------|-------------|
|         | 1.483325714                                                                                      | 2.155081162 | 2.192121883 | 1           | 1.063834545 |
|         | 1.119076828                                                                                      | 1.365591275 | 1.055126958 |             |             |
| YDR020c | YDR020c::YDR020C::molecular_function unknown                                                     |             |             |             | 1.004730173 |
|         | 0.936108426                                                                                      | 0.871282396 | 0.969793127 | 0.884197518 |             |
|         | 1.26256756                                                                                       | 0.933159155 | 0.758383097 | 0.642711314 | 1.403870241 |
|         | 0.42703187                                                                                       | 0.397890246 | 0.703825326 | 1           | 0.736258663 |
|         | 0.70515899                                                                                       | 0.54614388  | 0.795226485 | 0.853725499 | 0.875508162 |
|         | 1.240106116                                                                                      | 1           | 0.739953824 | 0.738322762 | 0.709695128 |
|         | 0.877687368                                                                                      | 1           | 0.600555354 | 0.568015176 | 0.774134959 |
|         | 0.624532708                                                                                      |             |             |             | 0.484982764 |
| YPR054W | YPR054W::SMK1::involved in sporulation                                                           |             |             |             | 1.210355097 |
|         | 0.987355188                                                                                      | 1.214306518 | 0.626540146 | 1.376597693 | 1.281811855 |
|         | 0.79896292                                                                                       | 0.820235213 | 1.461225999 | 1.252336944 | 0.699971007 |
|         | 1.182618658                                                                                      | 1           | 0.336586605 | 0.310240629 | 0.344748289 |
|         | 0.387667616                                                                                      | 0.629557323 | 0.577905532 | 0.647931881 | 1           |
|         | 1.341901305                                                                                      | 1.217542423 | 1           | 0.786144612 | 0.452159392 |
|         | 0.927913987                                                                                      | 0.348403477 | 1           | 0.627486104 | 0.473111565 |
|         | 0.093458172                                                                                      | 0.818949497 | 0.625195524 |             | 0.955106141 |
| YPR056W | "YPR056W::TFB4::RNA polymerase transcription initiation TFIIB (factor b), 37 kDa subunit"        |             |             |             | 0.941934537 |
|         | 1.26091206                                                                                       | 0.938314171 | 0.846852552 | 1.132857925 | 1.030869653 |
|         | 0.945215463                                                                                      | 0.929733252 | 0.758399321 | 1.188492633 | 0.595658227 |
|         | 0.409676585                                                                                      | 0.642315885 | 1.280403361 | 1           | 0.898015829 |
|         | 1.411321099                                                                                      | 0.860470443 | 1           | 0.932295826 | 1.033247182 |
|         | 0.791212674                                                                                      | 0.943643079 | 1           | 0.891438468 | 1.116129662 |
|         | 0.816253098                                                                                      | 1.197559668 | 1           | 1.260678104 | 1.168822576 |
|         | 1.256457612                                                                                      | 1.034987604 |             |             | 0.657532029 |
| YPR058W | YPR058W::YMC1::putative mitochondrial carrier protein 1                                          |             |             |             |             |
|         | 1.088700344                                                                                      | 0.919098181 | 0.684527747 | 0.806781939 | 1           |
|         | 0.764285143                                                                                      | 0.844501034 | 0.790722623 | 1           | 1.250048428 |
|         | 0.732473212                                                                                      | 0.920465595 | 1           | 1.233845257 | 1.083175156 |
|         | 0.807249283                                                                                      | 1           | 1.657289465 | 0.967697511 | 0.888782849 |
|         | 1.017294049                                                                                      | 0.920918272 | 1.064241528 | 1.021294805 | 0.953127976 |
|         | 0.869498934                                                                                      | 1.311761336 | 1.169508778 | 1.055510662 | 1.128218013 |
|         | 1.251386764                                                                                      | 1.398966904 | 1.187122763 | 0.942622647 | 0.763166004 |
| YOR267C | YOR267C::HRK1::Hygromycin Resistance Kinase<br>                                                  |             |             |             | 1           |
|         | 1.069550007                                                                                      | 1.30063943  | 1.123877833 | 1           | 1.468097751 |
|         | 0.987796502                                                                                      | 0.785707702 | 1           | 1.732022384 | 1.500783316 |
|         | 0.882268329                                                                                      | 1           | 2.030448276 | 1.179474544 | 1.347533737 |
|         |                                                                                                  |             | 1           | 1.206769452 | 1.137709202 |
|         | 0.940942425                                                                                      | 1           | 1.905600945 | 1.159157853 | 0.907223727 |
|         | 0.792357892                                                                                      | 1           | 2.286465217 | 1.43633434  | 1.141199027 |
|         | 1.232781543                                                                                      | 0.741653531 |             |             | 0.922743788 |
| YOR269W | YOR269W::PAC1::Required for viability in the absence of the kinesin-related Cin8p mitotic motor. |             |             |             | 1           |
|         | 0.88822246                                                                                       | 1           | 0.931543584 | 1.035155523 | 0.978718555 |
|         | 1.013396045                                                                                      | 0.850047279 | 0.793387281 | 0.820311269 | 1           |
|         | 0.75241694                                                                                       | 0.740395913 | 1           | 1.003047557 | 1.110106263 |
|         | 0.976534421                                                                                      | 1           | 0.973413103 | 0.965973037 | 1.0069593   |
|         | 0.936490809                                                                                      | 1           | 1.0058607   | 1.148622629 | 0.78061699  |
|         | 1.25245721                                                                                       | 1           | 1.217195604 | 1.16568566  | 1.187604333 |
|         | 1.487106865                                                                                      | 0.882629006 |             |             | 1.349940691 |
| YOR271C | YOR271C::YOR271C::molecular_function unknown                                                     |             |             |             | 1           |
|         | 0.751565355                                                                                      | 0.587989098 | 0.540813655 | 1           | 0.863363342 |
|         | 0.589498942                                                                                      | 0.637008091 | 1           | 0.666774506 | 0.579087764 |
|         | 0.588010758                                                                                      | 1           | 0.577117473 | 0.446636773 | 0.434749092 |
|         | 0.583734947                                                                                      | 0.400900997 | 0.409078775 | 0.663342178 | 1           |
|         |                                                                                                  |             |             |             | 0.969585875 |



|         |                                                 |             |             |             |             |             |             |             |
|---------|-------------------------------------------------|-------------|-------------|-------------|-------------|-------------|-------------|-------------|
|         | 0.848946906                                     | 1.209946695 | 1.18722366  | 1.087728235 | 1           | 0.894397798 |             |             |
|         | 0.636482795                                     | 0.665408023 | 0.555423158 | 0.666480382 | 1           | 0.727480516 |             |             |
|         | 0.497674861                                     | 0.673011383 | 0.686274858 | 0.527845981 | 1.059505073 |             |             |             |
| YOR273C | YOR273C::TPO4::Polyamine transport protein      |             |             |             |             | 1           | 1.156632246 |             |
|         | 1.117909373                                     | 1.025142737 | 0.661201486 | 1           | 1.212382856 | 1.281477541 |             |             |
|         | 0.704468769                                     | 0.531903208 | 1           | 1.76561857  | 1.571853152 | 1.102104913 |             |             |
|         | 0.667652441                                     | 1           | 0.998573037 | 0.955715232 | 1.120253958 | 0.659959522 | 1           |             |
|         | 1.383459858                                     | 1.123796124 | 1.140610886 | 0.590231446 | 1           | 0.993739632 |             |             |
|         | 0.86846806                                      | 0.839589817 | 0.936248529 | 1.109857463 | 1           | 1.008069316 |             |             |
|         | 0.698820893                                     | 0.705806714 | 0.7641459   | 0.895896843 | 1           | 0.925370746 |             |             |
|         | 0.797303232                                     | 0.855524798 | 1.043528488 | 1.082620094 | 0.765295387 |             |             |             |
| YOR287C | YOR287C::molecular_function unknown             |             |             |             |             | 1           | 1.012117947 |             |
|         | 1.192342504                                     | 1.024221746 | 1.310839478 |             | 0.840245239 | 0.843557383 |             |             |
|         | 1.240181266                                     | 1.395143334 |             | 0.747491846 | 0.576455783 | 0.773590693 |             |             |
|         | 1.251147939                                     | 1           | 0.406279302 | 0.43202252  |             | 0.690997093 | 1           |             |
|         | 0.953702143                                     |             | 1.017084298 | 1           | 0.623255254 | 0.65817005  | 0.550198136 |             |
|         | 0.585337515                                     | 0.892244509 | 1           | 0.806206884 | 1.293980164 | 0.970616784 |             |             |
|         | 1.884665787                                     | 1           | 0.622009806 | 0.682394651 | 0.916348678 | 1.373580104 |             |             |
|         | 0.888829681                                     | 1.154948061 |             |             |             |             |             |             |
| YFR055W | YFR055W::YFR055W::not yet annotated             |             |             |             |             | 1           | 0.863627435 | 0.687531439 |
|         | 0.952703875                                     | 1.084125153 | 1           | 0.981717831 | 0.888036863 | 1.147646146 |             |             |
|         | 1.246715643                                     | 1           | 0.950627656 | 0.784207326 | 0.617476527 | 1.771964466 | 1           |             |
|         | 0.633864846                                     | 0.448038567 | 0.475888355 | 0.695471888 | 1           | 1.185566378 |             |             |
|         | 0.912232606                                     | 0.952204964 | 1.514174647 | 1           | 0.801100399 | 0.987873455 |             |             |
|         | 1.442239608                                     | 1.270610186 | 1.098909377 | 1           | 0.842029099 | 1.104460252 |             |             |
|         | 1.440150443                                     | 1.466229871 | 0.830278066 | 1           | 1.065301027 | 0.967174981 |             |             |
|         | 1.708618196                                     | 1.109359453 | 1.089312524 | 1.570869482 |             |             |             |             |
| YOR289W | YOR289W::YOR289W::molecular_function unknown    |             |             |             |             | 1           | 0.657040199 |             |
|         | 1.228786452                                     | 1.188400488 | 1.542729384 | 1           | 0.88278363  | 1.089891344 |             |             |
|         | 1.593267333                                     | 1.628335725 | 1           | 0.781590705 | 1.826978132 | 3.476880424 |             |             |
|         | 2.056534798                                     | 1           | 2.814679793 | 2.948830899 | 4.269678185 | 4.772173012 | 1           |             |
|         | 3.258724327                                     | 3.990257186 | 6.355345447 | 3.455095101 | 1           | 1.157837766 |             |             |
|         | 1.960393402                                     | 1.837536694 | 1.086961022 | 1.468392475 | 1           | 0.880716816 |             |             |
|         | 1.635235762                                     | 2.048906171 | 2.605070884 | 1.885928608 | 1           | 1.330842686 |             |             |
|         | 2.190619677                                     | 1.962550025 | 2.104336645 | 3.774168919 | 1.843188537 |             |             |             |
| YFR057W | YFR057W::YFR057W::molecular_function unknown    |             |             |             |             | 1           | 1.578924459 |             |
|         | 1.465620122                                     | 1.627088838 | 1.268963885 | 1           | 1.780494109 | 1.305104153 |             |             |
|         | 1.476208059                                     | 1.344116153 | 1           | 1.306029366 | 1.183337303 | 1.303744794 |             |             |
|         | 1.429124252                                     | 1           | 1.771601435 |             | 1.041707928 |             |             |             |
|         |                                                 |             | 1.17778129  | 0.870699328 | 1.153792252 | 1.039362986 | 1           |             |
|         | 1.063318738                                     | 1.556980716 | 1.45650895  | 1.410962804 | 1.441345651 | 1           |             |             |
|         | 1.103678683                                     | 1.30349394  | 0.998831262 | 1.240321555 |             | 0.741653531 |             |             |
| YDR022c | YDR022c::CIS1::Involved in microtubule assembly |             |             |             |             |             | 0.776942075 |             |
|         | 0.898527373                                     | 0.826309919 | 0.995611434 |             | 0.632000034 | 0.684292014 |             |             |
|         | 1.050709117                                     | 1.064323368 |             | 0.810184693 | 1.057717    | 1.429156276 |             |             |
|         | 1.062203102                                     | 1           | 2.2296559   | 2.587717259 |             | 3.120194874 | 1           |             |
|         | 2.019885086                                     | 3.618858712 |             | 2.081483253 | 1           | 1.080120033 | 1.400956528 |             |
|         | 1.096002542                                     | 0.845469461 | 1.32406319  |             | 0.506447392 | 1.274226284 |             |             |
|         | 1.086971086                                     | 1.31166674  | 1.549068839 | 1           | 1.569804708 | 2.475877917 |             |             |
|         | 1.541706898                                     | 1.540015747 | 2.303595817 | 1.178589866 |             |             |             |             |
| YOR291W | YOR291W::YOR291W::molecular_function unknown    |             |             |             |             | 1           | 1.472325744 |             |
|         | 1.474116465                                     |             | 1.045190745 | 1           | 1.808355526 | 1.088759954 |             |             |
|         | 1.00535771                                      | 1           | 1.589009112 | 1.52957073  | 0.939581565 | 1.424371715 | 1           |             |
|         | 1.412568223                                     |             |             |             |             |             | 1           |             |
|         | 0.916628369                                     | 1.00503401  | 0.906693198 | 0.918713414 | 1.072683163 | 1           |             |             |
|         | 1.24671589                                      | 1.10568598  | 0.780916914 | 1.014160785 | 0.947623403 | 1           |             |             |
|         | 1.061468672                                     | 0.841329655 | 0.962560935 | 0.984698074 | 0.760921664 | 0.892260903 |             |             |

YGL002W YGL002W::ERP6::Emp24p/Erv25p related protein 6 1 1.324035468  
1.386531815 1.024926275 1.705218193 1 1.059065273 1.089083966  
1.717481191 1.318200133 1 1.31328492 1.158876566 1.666057268  
1.319955399 1 0.926390644 0.556008499 0.829228494 1.187619783 1  
2.334233023 2.397566028 3.293861842 2.055505899 1 0.928592697  
0.498516343 0.872048627 0.930993298 1 0.874485566 0.98851209  
1.019383733 0.761955951 1.395879312 1 1.095868165 1.036710202  
0.870883016 1.215788627 1.231878831 1.509575756  
YDR024w YDR024w::FYV1::Function required for Yeast Viability on toxin  
exposure 1 0.943779867 0.791570337 0.694560132 0.889397651 1  
0.740004099 0.695965442 0.871512369 1 0.824995733 0.73432024  
0.87241406 0.799986478 1 1.175154414 1.123713818 1.441333869  
1.307917386 1 1.260792842 1.305274735 1.211692813 1.330072413 1  
0.980199309 1.142527796 1.165815677 1.123170941 1 0.785417627  
0.951444347 0.57075015 0.518090231 0.759763441 1 0.777410451  
1.246373867 0.820175776 0.899923622 0.831390199 1.230251695  
YOR293W YOR293W::RPS10A::Homology to rat S10 1 1.058001718  
1.247190769 0.750724104 1.476530057 1 0.986057692 0.90511114  
1.453896968 1.032910419 1 0.772142093 0.881762699 0.691025734  
0.92376451 1 0.980358316 0.328853808 0.205017716 0.89175962 1  
1.179331487 0.940917588 0.593705325 0.989374837 1 0.897029991  
0.751152071 0.523324946 0.693940459 1.140157393 1 1.275007829  
1.727745667 0.805556969 0.829994622 2.248168087 1 1.474540816  
1.83385772 1.201738832 2.865781207 1.351761782 1.302052878  
YGL004C YGL004C::YGL004C::molecular\_function unknown 1 1.026220817  
1.130850668 0.938160787 1.06059387 1 0.975314592 1.186286801  
1.16344268 1.058936969 1 0.926819006 1.271001704 1.382038127  
1.271427912 1 1.651220577 1.061925036 1.123806903 1.546734205 1  
1.997432351 1.517786843 1.944250268 1.155156997 1 1.000925215  
1.193475434 1.143342798 0.956624771 1.147145458 1 1.124713556  
1.200938484 1.229105338 1.171617247 1 1.393230062  
1.214445133 0.73700359 1.123518029 0.889634012  
YDR026c YDR026c::YDR026C::molecular\_function unknown 1 0.629074364  
0.829837743 0.829461933 0.783746723 1 0.715323575  
0.84118234 1 0.829346643 0.832166047 0.586527143 0.900853353 1  
0.564563706 0.749488843 1.07491309 1 1.395804959 1.230478008  
1.875476103 1.025376343 1 0.900967943 0.942791625 0.798543037  
0.586486596 1.088956284 1 0.94555172 1.070507347 1.042499638  
1.122027909 0.978841774 1 1.009094409 1.243823852 1.100591926  
0.844354516 1.044753147 0.90539525  
YOR295W YOR295W::UAF30::Topoisomerase 1 and RAD52 epistasis group  
Interactions 0.876676359 0.957745961 0.893398682  
0.779708824 0.900673232 1.322330074 0.653452539 0.635687929  
0.671925436 1.198282514 1 0.686210427 0.547670835 0.71333604 1  
1.009942515 1.13023649 1.271661046 0.702887306 1 0.891362742  
0.91391849 0.912740252 0.819957264 0.998686488 1 0.840413291  
1.429256298 1.719681867 1 0.808309088 0.879639977  
0.963812406 1.375630849 1.118171805  
YGL006W YGL006W::PMC1::May be involved in depleting cytosol of Ca<sup>2+</sup> ions 1  
1.336394637 1.158500562 1.622031157 0.961282652 1 1.496371695  
1.64944451 1.231653541 1.026845354 1 1.280137196 1.545448732  
1.011289774 1.506040194 1 1.359092452 1.294677313 0.936312905  
0.818409412 0.932594636 0.640905699 0.523998581 1.094469289  
1.0142819 0.4847775 0.76836819  
2.044168072 1 0.529550924 0.364759155 0.489877688  
YGL006W YGL006W::PMC1::May be involved in depleting cytosol of Ca<sup>2+</sup> ions

1

1.144758691 1.296514276 1.450331567 1.089130445 1.132422543 1  
1.170620171 0.951040453 1.036254107 1.054563923 0.711165269 1  
1.131678973 1.057689162 1.153450763 0.893304217 1.04884435 0.973693878  
YDR028C YDR028C::REG1::The reg1 locus encodes a gene which is involved in  
RNA processing and is a negative regulator of glucose-repressible genes. 1  
0.68008247 0.744267331 0.972880901 0.622133503 1 0.932798203  
0.945343551 0.790046293 0.62505902 1 1.06602724 1.039800909  
1 1.173043525 0.87488325 0.819217988 1 1.109004771  
0.864194903 1.095984698 1.180662013 1 0.997446874 0.869586187  
0.99813822 0.993255848 1.159166099 1 0.971707884 0.797593899  
1.139992581 0.848591709 0.613744777 1 0.747873805 0.614245727  
0.690567325 0.436479665 0.663802416  
YOR297C YOR297C::TIM18::mitochondrial inner membrane translocase 1  
1.485618907 1.497098936 0.878874346 1.38133033 1 1.022184474  
0.927333825 1.302511793 0.913511512 1 1.189019076 0.960228696  
1.219309228 0.837941241 1 0.804480062 0.462229885 0.528077656  
0.833328785 0.563456825 0.513693802 0.448986329  
1.327286529 1.36955672 0.856756438 1.134379308 1.142505173 1  
0.658453163 1.024402361 0.670330586 0.667895952 0.898173062 1  
0.813888212 0.945408889 0.718918232 1.368464917 1.080103564 1.431645232  
YGL020C YGL020C::SWF3::Spore Wall Formation 1 1.057034146 1.100589674  
0.866788465 1.314484208 1 0.868850941 0.949713632 1.487562503  
1.291699995 1 0.769749861 0.911290329 1.329976976 1.087038293 1  
0.930226786 0.722769602 0.813007149 1.0753782 1 1.369799524  
1.664202344 1.559293029 0.84467083 1 0.922565328 1.058743205  
0.907780614 0.906281983 0.917542983 1 0.984941218 1.127157619  
1.105911649 0.862176999 0.989236775 1 1.170145421 1.275108694  
1.042848017 1.313143722 1.032237295 1.323067897  
YDR042C YDR042C::molecular\_function unknown  
0.988493991 1.028694339 1.291260117 0.921542483  
1.11264535 0.867327932 1.453696055 1.056329127 1  
0.862173645 1.572189189 1 1.401787074 3.000008625  
2.33754331 1 0.899630404 0.97238107 0.699569665 0.886879371  
1.115320622 0.667293382 1.123314971 0.939046602 0.901539994  
1.6447692 1 1.125520301 1.140411791 1.335913841 0.175337643  
1.927287166 0.868618994  
YGL022W YGL022W::STT3::Required for protein glycosylation 1  
0.935243911 0.641939707 0.94989216 0.371440729 1 1.013610974  
1.031113768 0.620955891 0.719100028 1 0.941121988 0.814916119  
0.555281775 0.823862397 1 1.387204818 1.074779684 1.459951233  
0.618193353 1 0.651240176 0.540099941 0.370809309 0.463396802 1  
1.067210528 0.953414304 1.266057097 1.466303463 0.914870583 1  
0.681412074 0.588869972 0.65995303 0.60372762 0.339412246 1  
0.914561475 0.662244226 1.013644801 0.609118093 0.803358313 0.62957364  
YDR044W "YDR044W::HEM13::Oxygen-repressed, sixth step in heme biosynthetic  
pathway" 1 1.680305222 1.205069665 1.016401009 0.959482222 1  
1.35876659 1.301806181 1.082428732 0.990550258 1 1.2617203  
0.72603366 1.966493103 0.772393229 1 0.978233167 0.653813154  
0.670439252 0.973620195 1 0.772210957 0.358866166 0.612942398  
0.733336019 1 0.835307051 0.454243437 0.663963978 2.773564381  
2.126942615 1 0.915854407 0.384885406 0.604623918 0.915378614  
1.647677288 1 0.486354611 0.204056812 0.493572815 0.880283158  
0.530210364 1.468421488  
YGL024W YGL024W::molecular\_function unknown 1 1.198741601  
1.248160772 1.079195209 1.010678048 1 1.431952636 1.262918357  
1.149755112 1 1.447305462 1.405602553 1.273750964 1.16700437 1

|         |                                                   |             |             |             |             |             |
|---------|---------------------------------------------------|-------------|-------------|-------------|-------------|-------------|
|         | 0.76140897                                        | 0.874065888 | 1           | 0.217105486 |             | 0.116098746 |
|         | 0.911867567                                       | 0.816395709 | 0.890097188 | 1.378707259 | 0.852572926 |             |
|         | 0.856396023                                       | 0.645023745 | 0.656346438 | 0.89322661  |             | 0.87834135  |
|         | 1.070843605                                       | 0.956436804 | 0.72238979  |             |             |             |
| YGL026C | YGL026C::TRP5::tryptophan synthetase              |             | 1           |             | 0.966660372 |             |
|         | 0.708926186                                       | 0.824816916 | 0.334881753 | 1           | 1.066156829 | 1.003682888 |
|         | 0.570817913                                       | 0.559805835 | 1           | 1.398953614 | 1.293236187 | 0.75277454  |
|         | 0.533169186                                       | 1           | 2.099163524 | 1.638475211 | 1.658064137 | 0.627496834 |
|         | 1.053869986                                       | 0.617882295 | 0.45782973  | 0.534975254 | 1           | 1.07136015  |
|         | 0.937311598                                       | 1.442033336 | 1.176074265 | 0.750591901 | 1           | 1.084671361 |
|         | 1.051224841                                       | 1.307512574 | 1.065289815 | 0.629463091 | 1           | 1.01962706  |
|         | 1.119581011                                       | 1.156337096 | 0.646409119 | 0.602433844 | 0.815205939 |             |
| YDR046C | YDR046C::BAP3::branched-chain amino acid permease |             | 1           |             |             |             |
|         | 1.228997433                                       | 0.843358334 | 0.873480881 | 0.512590253 | 1           | 0.992213144 |
|         | 0.965822882                                       | 0.600312658 | 0.673453062 | 1           | 1.375303    | 0.939796054 |
|         | 1.073224874                                       | 0.709985733 | 1           | 0.488077089 | 0.145346625 | 0.329126125 |
|         | 0.268178162                                       | 1           | 1.314722856 | 0.878253382 | 0.878418929 | 0.909540912 |
|         | 0.758938589                                       | 0.639678688 | 0.619329813 | 1.106262286 | 1.059257298 | 1           |
|         | 0.991254673                                       | 0.567323864 | 0.945117109 | 1.039586492 | 0.641266727 | 1           |
|         | 0.661224803                                       | 0.503289098 | 0.851009394 | 0.473868594 | 0.292252179 | 0.639205537 |
| YGL028C | YGL028C::SCW11::Soluble Cell Wall protein         |             | 1           |             | 0.836990821 |             |
|         | 0.528953221                                       | 0.974805853 | 0.621888585 | 1           | 0.827842552 | 0.85977429  |
|         | 0.703464008                                       | 0.810142278 | 1           | 0.862010973 | 0.583355551 | 0.389800783 |
|         | 0.662233825                                       | 1           | 0.634746235 | 0.569474976 | 0.713589622 | 0.555621664 |
|         | 0.474374125                                       | 0.309273278 | 0.387537601 | 0.861605343 | 1           | 0.917863569 |
|         | 0.827212272                                       | 0.686175877 | 0.93268996  | 0.88080734  | 1           | 0.564054063 |
|         | 0.5375246                                         | 0.715575178 | 0.186261    | 0.374253708 | 1           | 0.808912738 |
|         | 0.725759322                                       | 0.89703687  | 0.803769412 | 0.833762915 | 0.760917271 |             |
| YDR048C | YDR048C::YDR048C::molecular_function_unknown      |             | 1           |             | 1.072871072 |             |
|         | 0.888606404                                       | 1.247499343 | 1.03354853  | 1           | 0.893767475 | 1           |
|         | 0.957415493                                       | 1.069142322 | 2.083579281 | 0.200846505 |             | 0.970675109 |
|         |                                                   |             | 1           | 0.799530457 | 0.921678185 |             |
|         | 1.010708094                                       | 0.824090879 | 1.145589681 | 1           | 0.942620478 | 0.939430621 |
|         | 1.15156798                                        | 1.222952842 | 0.972624895 | 1           | 0.835548431 | 0.841050376 |
|         | 1.164418767                                       | 0.333866724 | 0.974451751 | 0.867743381 |             |             |
| YDR050C | YDR050C::TPI1::induced under stress conditions    |             | 1           |             | 1.534443069 |             |
|         | 1.136985054                                       | 0.947134125 | 1.398974969 | 1           | 0.889061494 | 0.817719386 |
|         | 1.201732229                                       | 1.301211517 | 1           | 1.055526036 | 1.059237442 | 1.684156998 |
|         | 0.705964839                                       | 1           | 1.642829284 | 1.872035828 | 1.149942421 | 0.785194448 |
|         | 1.709014458                                       | 2.200510181 | 1.784597547 | 0.732971832 | 1           | 1.430962909 |
|         | 1.18327825                                        | 2.055150064 | 1.28882238  | 1.407803673 | 1           | 1.216254323 |
|         | 1.627674329                                       | 1.661169902 |             | 0.812539264 | 1           | 1.911098432 |
|         | 1.479346612                                       | 1.139907336 | 1.689322476 | 1.422889    |             | 1.685490534 |
| YDR052C | YDR052C::DBF4::Required for Cdc7 kinase activity  |             | 1           |             |             |             |
|         | 0.700056508                                       | 0.806049799 |             | 0.840578727 | 1           | 0.826843835 |
|         | 0.776387334                                       | 0.769151585 | 1           | 0.731434663 | 0.770562833 | 0.522025461 |
|         | 0.89982704                                        | 1           | 0.913890139 |             | 0.730117465 | 1.062884457 |
|         | 0.488251423                                       | 0.549002665 | 1           | 0.798378392 | 0.853637786 | 0.884092844 |
|         | 0.939402027                                       | 1.049562364 |             | 0.680334908 | 1.29856678  | 0.800855688 |
|         | 1                                                 | 0.646053836 |             | 0.677659741 | 0.254617408 | 0.866867768 |
| YOR311C | YOR311C::HSD1::ER membrane protein                |             | 1           |             | 1.104591982 | 0.934976667 |
|         | 0.765791863                                       | 0.850093264 | 1           | 0.84250724  | 0.80890733  | 0.929853691 |
|         | 0.785721968                                       | 1           | 1.167205859 | 0.908637004 | 0.79340693  | 0.778923203 |
|         | 0.894132303                                       | 0.627607786 | 0.698467466 | 0.866753355 | 1           | 1.191914049 |
|         | 0.790922263                                       | 0.820238408 | 0.656356686 | 1           | 1.127981761 | 0.90783131  |
|         | 1.199311816                                       | 0.931233061 | 1           | 0.859513629 | 0.906558921 | 0.711196533 |

0.584425951 0.622392944 1 0.793291415 0.883647769 0.827599094  
 0.722917086 0.799463935 0.939544512  
 YOR313C YOR313C::SPS4::sporulation-specific protein 0.842200327  
 0.997604553 0.743567114 1.013232882 0.687693527 0.740309495  
 0.824137532 0.877230413 0.671537002 0.848289019 2.49722564  
 0.785149164 1 1.199710165 1.349290679 1.052288792 1.586539837 1  
 2.166335359 1.844991581 2.087158446 1.6719587 1 1.184407476  
 1.319234155 1.151044539 0.935775305 1.250136479 1 1.046681643  
 1.233572817 1.238930049 0.975499909 1.441289986 1 0.868868932  
 1.116713765 0.805397822 0.934206415 0.96853627 1.300301653  
 YOR315W YOR315W::YOR315W::molecular\_function\_unknown 1 0.817103311  
 0.661954784 0.863344371 1 0.858637418 0.836923773 0.796648496  
 0.586464495 1 0.791402659 0.617350705 1.182841505 0.774912387  
 1.685526666 0.87040797 1.138747584 1 1  
 0.945039782 0.847647672 1.13074896 1.094770156 1 0.956137421  
 0.741638361 0.854557386 0.764195426 0.789165159 1 1.107650904  
 0.914854158 0.782972755 0.924602649 0.778257976 0.732897299  
 YOR317W YOR317W::FAA1::cellular\_lipid\_metabolism\_and\_protein\_N-myristolation  
 1 0.982789246 0.874551123 1.093387359 0.720506084 1 1.44433986  
 1.315060605 0.787457084 1 0.940441172 1.098254721 0.688441001  
 0.964922843 1 1.201266189 0.515582598 0.956353708 0.604724603 1  
 1.627327845 0.811543485 0.976762932 1.079749516 1 0.897776771  
 0.820975086 1.050912836 1.042843711 0.955177887 1 0.966661112  
 0.565196252 0.64015871 0.897540578 0.636109332 1 0.73511652  
 0.594530848 0.867616055 0.65629605 0.956873258 0.602429332  
 YOR319W YOR319W::HSH49::Human\_SAP\_Homolog\_49.\_A\_yeast\_homolog\_of\_a\_human  
 spliceosome\_associated\_protein\_(SAP)\_called\_SAP\_49. 1 0.958684446  
 0.79448078 0.895857526 1.128135369 1 0.778535058 0.793157889  
 1.177584785 1.023035882 1 0.742340868 0.717985419 1.542453607  
 0.9447405 1 0.706844483 0.98556174 0.544740605 0.892167565 1  
 1.83034982 1.965138016 1.595076493 2.501553812 1 0.977296814  
 0.829335019 0.767399583 0.784528418 0.947794754 1 1.000787841  
 1.260042028 1.097377817 1.064867525 1.554838539 1 1.085925486  
 1.081899716 1.066552891 0.963488456 1.218409083 1.235505476  
 YGL030W YGL030W::RPL30::Homology\_to\_rat\_and\_mouse\_L30 1 1.217061957  
 1.280304745 0.710924088 1.204678773 1 0.960960934 0.883353555  
 1.136723206 1.068198886 1 0.884576418 0.807226297 0.81432737  
 0.795578278 1 0.541238345 0.222621089 0.139222779 0.31622359 1  
 1.587263306 0.920679156 0.431531384 0.876701233 1 1.192503836  
 1.144621609 0.939458289 1.101583697 1.097180976 1 0.916530065  
 1.07229691 0.780241752 0.535706167 1.151628941 1 0.964436952  
 1.017081294 0.915286394 1.451338022 1.098810175 1.087524994  
 YOR321W YOR321W::PMT3::Transfers\_mannose\_residues\_from\_dolichyl\_phosphate-D-  
 mannose\_to\_specific\_serine/threonine\_residues\_of\_proteins\_in\_the\_secretory  
 pathway 1 1.002455124 0.834955316 0.901483744 0.660888541 1  
 0.992110788 0.959022905 0.761528935 0.717579818 1 0.958222629  
 0.83879956 0.881450589 1.000400602 1 1.015457989 0.752983817  
 0.82282765 0.873579775 1 1.259314868 1.110928684 1.031925726  
 0.937590713 1 1.055438671 1.001896234 1.304827855 1.242110268  
 1.315236276 1 0.836940822 0.901499864 1.117264587 1.121258159  
 0.390466052 1 0.604702969 0.684049427 0.667526917 0.445709749 0.521468  
 0.742529143  
 YGL044C YGL044C::RNA15::Protein\_with\_a\_role\_in\_mRNA\_stability\_and/or\_poly(A)  
 tail\_length 1 0.743795242 0.948182453 0.878480013 1.101241052 1  
 0.904032194 0.812362019 1.057411096 1.11502314 1 0.831882434  
 0.827256017 0.937758892 1.168033092 1 0.620293065 0.653924828  
 0.718038567 1.273952438 1 1.492470597 2.163820649 2.055369908

|             |                                             |                             |             |             |             |
|-------------|---------------------------------------------|-----------------------------|-------------|-------------|-------------|
| 1.322980111 | 1                                           | 0.885857797                 | 0.945390911 | 0.766959125 | 0.788331945 |
| 0.991458543 | 1                                           | 1.073431633                 | 1.135639785 | 1.348430061 | 1.088295273 |
| 1.189308313 | 1                                           | 0.983256132                 | 0.918904481 | 1.079295701 | 1.021441264 |
| 1.237096055 |                                             | 0.922907714                 |             |             |             |
| YDR066c     | YDR066c::YDR066C::molecular_function        | unknown                     | 1           | 0.939279036 |             |
| 0.98870851  | 0.99648581                                  | 1.314604947                 | 1           | 0.907469499 | 0.80863356  |
| 1.342856409 | 1.375765905                                 | 1                           | 0.902190002 | 1.037407286 | 1.458836793 |
| 1.186606434 | 1                                           | 1.064240429                 | 1.432289248 | 1.031542894 | 1           |
| 1.086678344 | 1.678621368                                 | 1.74658348                  | 1.470149078 |             | 0.954094225 |
| 0.961819006 | 0.803209187                                 | 0.808608862                 | 1.108057769 | 1           | 0.746887673 |
| 1.146158535 | 1.051853649                                 | 0.975722582                 | 1.344375415 | 1           | 1.022241516 |
| 1.216390034 | 0.997952891                                 | 0.398525717                 | 1.394768142 | 1.303804103 |             |
| YOR335C     | YOR335C::ALA1::Cytoplasmic                  | alanyl-tRNA synthetase gene | 1           |             |             |
| 0.999697202 | 0.712385551                                 | 0.980528193                 | 0.69159314  | 1           | 1.024109446 |
| 1.092522094 | 0.749400485                                 | 0.734795445                 | 1           | 1.096436201 | 0.754865032 |
| 0.354523813 | 0.86981285                                  | 1                           | 0.918359686 | 0.577048819 | 0.503133073 |
| 0.413412647 | 1                                           | 0.63789749                  | 0.294234264 | 0.163065975 | 0.458728099 |
| 0.927121185 | 0.669656835                                 | 0.765680262                 | 1.122358947 | 0.797614372 | 1           |
| 0.762354745 | 0.370584573                                 | 0.486602794                 | 0.45427471  | 0.39756177  | 1           |
| 0.853516471 | 0.614456015                                 | 0.643102521                 | 0.589569844 | 0.502642233 | 0.536757491 |
| YGL046W     | YGL046W::YGL046W::molecular_function        | unknown                     | 1           | 2.055919425 |             |
| 2.059016052 | 1.894293057                                 | 2.120421602                 | 1           | 1.458714285 | 2.037205113 |
| 1.849609916 | 1                                           | 1.581532488                 | 1.574650629 | 1.868011084 | 1.670488212 |
| 0.957706805 | 0.811971632                                 | 0.705794355                 | 0.585877373 | 1           | 0.452335818 |
| 0.714921614 |                                             | 1                           | 1.03003835  | 0.911863031 | 0.904234972 |
| 1.033364987 | 1                                           | 0.999438896                 | 0.979827811 | 0.874573059 | 0.728719207 |
| 1.1114443   |                                             | 1.006740511                 |             | 1.34726228  | 0.995258953 |
| 1.371227171 |                                             |                             |             |             |             |
| YDR068W     | YDR068W::DOS2::Product of gene              | unknown                     | 1           | 0.583470477 |             |
| 0.693287031 | 0.641285324                                 | 0.797066128                 | 1           | 0.57947364  | 0.605377647 |
| 0.74421179  | 1                                           | 0.780549673                 | 0.914243911 | 0.873798293 | 0.730714167 |
|             | 0.862034688                                 | 0.987970503                 | 1           | 1.799946262 | 2.993610853 |
| 1.832810363 | 1                                           | 0.903536831                 | 1.190641584 | 0.613406649 | 0.599179182 |
| 1.040440828 | 1                                           | 1.263460748                 | 1.66786906  | 1.551104466 | 1.600686056 |
| 2.322867658 | 1                                           | 1.236002644                 | 1.557957998 | 1.193899025 | 1.279648441 |
| 2.034017173 |                                             | 1.225873579                 |             |             |             |
| YOR337W     | YOR337W::TEA1::Mutants are defective in Ty1 | Enhancer-mediated           |             |             |             |
| Activation  | 1                                           | 0.773595497                 | 0.617737643 | 0.790846569 | 0.561478493 |
| 0.761431829 | 0.794632615                                 | 0.717894693                 | 0.806204792 | 1           | 1.149714976 |
| 0.554006486 | 0.420159667                                 | 0.778899887                 | 1           | 0.577809011 | 0.33821849  |
| 0.466704447 | 1                                           | 1.569286916                 | 1.915859182 | 0.596673278 | 0.525348975 |
| 0.701522952 | 0.613943361                                 | 0.79733317                  | 0.995858016 | 0.871266377 | 1           |
| 0.962418149 | 0.647146545                                 | 0.767477507                 | 1.348123877 | 0.64044831  | 1           |
| 0.617635836 | 0.526117972                                 | 1.120454056                 | 0.612307569 | 0.607980273 |             |
| YGL048C     | YGL048C::RPT6::member of the 26 S           | proteasome                  | 1           | 0.825838002 |             |
| 0.90689943  | 1.009795957                                 | 1.092184652                 | 1           | 0.914984662 | 0.877810987 |
| 1.101461259 | 1.044052933                                 | 1                           | 0.892910751 | 1.075125048 | 1.103901898 |
| 0.875800195 | 1                                           | 1.01290049                  | 0.981263255 | 1.047984908 | 1.263030808 |
| 1.548617144 |                                             | 1.985065165                 | 1.900609084 | 1           | 1.133194676 |
| 1.673686522 | 0.925258394                                 | 0.986090586                 | 1           | 1.182835017 | 1.934252958 |
| 1.708695457 | 0.845628218                                 | 0.999851995                 | 1           | 1.398613862 | 1.708823299 |
| 1.234487732 | 1.006237029                                 | 1.306244949                 | 1.439525903 |             |             |
| YDR070c     | YDR070c::YDR070C::molecular_function        | unknown                     | 1           | 1.239952244 |             |
| 2.389963956 |                                             | 3.950959716                 | 1           | 1.391432522 | 2.153118625 |
| 4.748101034 | 1                                           | 1.320699471                 | 2.927159454 | 15.85522212 | 5.181507449 |
| 3.881676921 |                                             | 17.70971429                 | 13.41366527 | 1           | 1.537153341 |
| 16.78671079 | 4.147504953                                 | 1                           | 1.003981275 | 1.254361031 | 1.023831232 |

|         |                                                                                                                                        |             |             |             |             |             |
|---------|----------------------------------------------------------------------------------------------------------------------------------------|-------------|-------------|-------------|-------------|-------------|
|         | 1.09404395                                                                                                                             | 1.17198153  | 1           | 0.973423792 | 1.398682316 | 1.027308319 |
|         | 1.19000177                                                                                                                             | 1           |             | 1.131282016 | 1.062912868 | 2.781223271 |
|         | 1.099783781                                                                                                                            |             |             |             |             |             |
| YOR339C | YOR339C::UBC11::homolog of ubiquitin carrier protein E2-C                                                                              |             |             |             |             |             |
|         | 0.959172554                                                                                                                            | 0.847280612 | 1.02981247  | 0.752827155 |             | 0.780919537 |
|         | 0.862229899                                                                                                                            | 0.850637186 | 0.924313386 |             | 0.915074692 | 0.936079535 |
|         | 0.856615375                                                                                                                            | 1           | 1.225880378 | 0.864064896 | 1.429674941 | 1.080987722 |
|         | 0.803363308                                                                                                                            |             |             | 1           | 1.171024299 | 1.012401566 |
|         | 1.109673335                                                                                                                            | 1.031198444 | 1           | 0.734733972 | 0.768701685 | 0.80664604  |
|         | 0.663105062                                                                                                                            | 0.616971326 | 1           | 1.031285043 | 1.345866919 | 1.126286551 |
|         | 1.399057606                                                                                                                            | 1.037651123 |             |             |             |             |
| YGL050W | YGL050W::molecular_function unknown 1 0.864685922                                                                                      |             |             |             |             |             |
|         | 1.162414147                                                                                                                            | 0.831475805 | 1.184689935 | 1           | 0.770130526 | 0.756815166 |
|         | 1.082823499                                                                                                                            | 1.121215648 | 1           | 0.705059237 | 0.79528863  | 0.866069381 |
|         | 0.899670052                                                                                                                            | 1           | 0.426057424 | 0.368788987 | 0.581894307 | 1.139942048 |
|         | 1.750269098                                                                                                                            | 2.353663865 | 2.592724044 | 1.815286917 | 1           | 0.88275691  |
|         | 0.658038165                                                                                                                            | 0.919432602 | 1.010826098 | 1           | 0.850744842 | 0.981851989 |
|         | 0.953047848                                                                                                                            | 1.083799467 |             | 1           | 1.052879033 | 1.060718189 |
|         | 1.106542882                                                                                                                            |             | 1.09190311  |             |             |             |
| YDR072c | YDR072c::IPT1::necessary for synthesis of mannose-(inositol-P)2-ceramide (M(IP)2C) 1 0.895753419 0.641909803 0.862670333 0.571591959 1 |             |             |             |             |             |
|         | 0.922739566                                                                                                                            | 0.765771473 | 0.677035162 | 0.766354796 | 1           | 0.783115654 |
|         | 0.687801198                                                                                                                            |             | 0.691718088 | 1           | 1.13994826  | 1.085566381 |
|         | 0.975995084                                                                                                                            | 1           | 0.753400828 | 0.637955168 | 0.503360188 | 0.854105725 |
|         | 1.207708899                                                                                                                            | 1.289762952 | 1.212016085 | 2.08347691  | 1.480613288 | 1           |
|         | 0.522819316                                                                                                                            | 0.307162217 | 0.549636679 | 0.698424524 | 0.357008859 | 1           |
|         | 0.620572051                                                                                                                            | 0.473112481 | 0.690331349 | 0.464230265 | 0.795745757 | 0.504359402 |
| YOR341W | YOR341W::RPA190::alpha (190 kDa) subunit of RNA polymerase I 1                                                                         |             |             |             |             |             |
|         | 0.982586631                                                                                                                            | 0.653775892 | 1.080773579 | 0.391413591 | 1           | 1.165331673 |
|         | 1.202093206                                                                                                                            | 0.640886653 | 0.514560045 | 1           | 1.173189489 | 0.895753019 |
|         | 0.205538168                                                                                                                            | 0.978155377 | 1           | 0.584008681 |             | 0.641652524 |
|         | 0.348331743                                                                                                                            | 0.298720287 | 0.336907397 | 0.48689846  | 1           | 0.893486579 |
|         | 0.799418252                                                                                                                            | 1.08684048  | 1.481420412 | 0.846344782 | 1           | 0.879993013 |
|         | 0.489226068                                                                                                                            | 0.684975373 | 0.888129817 | 0.479436576 | 1           | 0.532610401 |
|         | 0.539278793                                                                                                                            | 1.069718698 | 0.578038144 | 0.538979773 | 0.879126451 |             |
| YGL052W | YGL052W::molecular_function unknown 0.828656124                                                                                        |             |             |             |             |             |
|         | 1.006715116                                                                                                                            | 0.773757001 | 0.939810219 |             | 0.797869727 | 1.034675813 |
|         | 1.165982394                                                                                                                            | 1.095298988 |             | 0.899401462 | 1.129641713 | 1.51446154  |
|         | 0.966262132                                                                                                                            | 1           | 1.134655868 | 0.751073679 | 0.937766235 | 1.30722373  |
|         | 1.689761676                                                                                                                            | 2.58187068  | 2.26096123  | 0.788975022 | 1           | 1.28240498  |
|         | 1.310932419                                                                                                                            | 1.134031958 |             | 1.326330479 | 1           | 1.11832559  |
|         | 1.739305777                                                                                                                            |             | 0.862433488 | 0.794628984 | 1.035392133 | 0.183437314 |
|         | 1.194075418                                                                                                                            | 1.196102433 |             |             |             |             |
| YDR074W | YDR074W::TPS2::Trehalose-6-phosphate phosphatase 1                                                                                     |             |             |             |             |             |
|         | 1.173464788                                                                                                                            | 1.296099661 |             | 0.920156443 | 1           | 1.632004511 |
|         | 0.622920385                                                                                                                            | 1           | 2.052062732 | 2.628009367 | 1.335064745 | 1.59211729  |
|         | 2.235761135                                                                                                                            |             | 2.758947271 | 0.811935109 | 1           | 1.882211671 |
|         | 1.259170134                                                                                                                            | 0.95038869  | 1           | 1.244111715 | 1.609008569 | 1.756189314 |
|         | 1.035557744                                                                                                                            | 0.992479544 | 1           | 1.562557841 | 0.858452779 | 2.158787395 |
|         | 1.037247085                                                                                                                            | 0.563826933 | 1           | 2.035002904 | 1.04731035  | 1.089873929 |
|         | 0.761030427                                                                                                                            | 1.877014398 | 0.688240476 |             |             |             |
| YGL054C | YGL054C::ERV14::ER-derived vesicles 1 1.349271859 1.128190189                                                                          |             |             |             |             |             |
|         | 0.865128582                                                                                                                            | 1.517057136 | 1           | 0.893876227 | 0.996947355 | 1.451942746 |
|         | 1.220605687                                                                                                                            | 1           | 0.832730238 | 0.962379328 | 1.11368243  | 1.053292636 |
|         | 1.156533367                                                                                                                            | 0.885736019 | 0.939350279 | 1.322235631 | 1           | 1.647250909 |
|         | 1.438396673                                                                                                                            | 2.002415065 | 1.414671739 | 1           | 1.318040882 | 1.337109962 |
|         | 1.182286732                                                                                                                            | 1.289810139 | 1.141138062 | 1           | 0.796910649 | 1.155227277 |

|         |                                                                                        |             |             |             |             |             |
|---------|----------------------------------------------------------------------------------------|-------------|-------------|-------------|-------------|-------------|
|         | 0.680201914                                                                            | 0.672772985 | 1.235308943 | 1           | 1.135527062 | 1.158045568 |
|         | 1.085890821                                                                            | 2.003913821 | 1.325616645 | 1.392242189 |             |             |
| YGL068W | YGL068W::YGL068W::molecular_function unknown                                           |             |             |             | 1           | 0.980203823 |
|         | 1.146170645                                                                            | 1.118682494 | 1.083584512 | 1           | 0.892924218 | 1.029324528 |
|         | 1.485576549                                                                            | 1.481028047 | 1           | 0.776759144 | 0.872371436 | 1.231982982 |
|         | 0.985309728                                                                            | 1           | 1.116766257 | 0.921287967 | 0.834948818 | 1.063891448 |
|         | 1.455864585                                                                            | 1.522271686 | 1.338523833 | 1.199492105 | 1           | 1.347753132 |
|         | 1.451349491                                                                            | 1.092544244 | 1.045126931 | 1.146426583 | 1           | 1.428689134 |
|         | 1.842565735                                                                            | 0.923686019 | 0.621766204 | 1.281622858 | 1           | 1.253152941 |
|         | 1.603931314                                                                            | 0.783089238 | 1.679187695 | 1.37305348  | 1.197853659 |             |
| YDR076W | "YDR076W::RAD55::Required for X-ray damage repair, full sporulation and viable spores" |             |             |             | 1.183266838 | 1.016964482 |
|         | 0.961318068                                                                            | 0.921542483 | 1.028391559 | 1.047694229 | 0.974157361 |             |
|         | 1.300613999                                                                            | 1.197303596 | 1           | 0.632446259 | 0.668795504 | 0.696013616 |
|         | 0.831751465                                                                            | 1           | 1.130050693 | 1.817352224 | 1.68005339  |             |
|         | 1.023711134                                                                            | 1.001396342 | 1.09014175  | 1.058754067 | 1.199917439 | 1           |
|         | 0.652044797                                                                            | 0.640488695 | 0.985162754 | 1.57209365  | 1.298802356 | 1           |
|         | 0.57036118                                                                             | 0.575995713 | 0.895356947 | 0.103513177 | 0.832450161 | 0.875624    |
| YGL070C | YGL070C::RPB9::RNA polymerase II subunit                                               |             |             |             | 1           | 1.146514644 |
|         | 1.192453042                                                                            | 1.002403654 | 1.316449868 | 1           | 0.892924218 | 0.941359329 |
|         | 1.377880142                                                                            | 1.281089275 | 1           | 0.922311437 | 1.044317082 | 1.000113165 |
|         | 1.085947023                                                                            | 1           | 0.77342811  | 0.594112746 | 0.867396011 | 1           |
|         | 0.895371725                                                                            | 0.814301936 | 0.819927367 | 0.880584423 | 1           | 1.180201577 |
|         | 1.120701228                                                                            | 0.911459239 | 0.987737463 | 1.040554005 | 1           | 0.870708089 |
|         | 1.113253613                                                                            | 0.705705665 | 0.856442829 | 1.082838544 | 1           | 0.913340915 |
|         | 0.986805313                                                                            | 0.819112144 | 1.234838242 | 1.096785843 | 1.564740036 |             |
| YDR090C | YDR090C::YDR090C::molecular_function unknown                                           |             |             |             | 1           | 1.013615768 |
|         | 0.706644715                                                                            | 0.761215163 | 1           | 0.802786085 | 0.807326928 | 0.656087432 |
|         | 0.761155465                                                                            | 1           | 0.986899327 | 0.864183225 | 0.650965828 | 0.734720217 |
|         | 1.120570126                                                                            | 0.97940586  | 0.861467466 | 1           | 1.210718494 | 0.769008808 |
|         | 0.707003508                                                                            | 0.98574117  | 1           | 1.25228749  | 0.977497666 | 1.288979891 |
|         | 1.136639874                                                                            | 1.046696298 | 1           | 1.148472774 | 1.047843315 | 1.135554599 |
|         | 0.892142924                                                                            | 0.995626779 | 1           | 1.286837662 | 1.063969178 | 0.863009585 |
|         | 0.819648214                                                                            | 1.005036079 | 1.053375628 |             |             |             |
| YGL072C | YGL072C::YGL072C::molecular_function unknown                                           |             |             |             | 1           | 1.146696388 |
|         | 1.261774227                                                                            | 0.967955577 | 1.200792617 | 1           | 0.94268054  | 0.986884235 |
|         | 1.245656795                                                                            | 1.244589958 | 1           | 1.229303011 | 1.352109106 | 2.247351634 |
|         | 1.131634275                                                                            | 1           | 1.669726142 | 0.966514473 | 1.617962148 | 1.556184528 |
|         | 1.43612825                                                                             | 3.223673767 | 2.243469784 | 1.303444461 | 1           | 1.182087833 |
|         | 1.121618269                                                                            | 1.260033826 | 0.91508745  | 0.886935654 | 1           | 1.089211243 |
|         | 1.380937613                                                                            | 1.165406026 | 1.124588089 | 1.108575282 | 1           | 0.922039337 |
|         | 1.018944789                                                                            | 0.823749329 | 0.887397727 | 0.701556972 | 1.323943457 |             |
| YDR092W | YDR092W::UBC13::ubiquitin-conjugating enzyme                                           |             |             |             |             | 0.694445881 |
|         | 0.947496596                                                                            | 0.730149335 | 1.130709167 | 0.629578537 | 0.761178746 |             |
|         | 1.046977005                                                                            | 0.864438153 | 1.140218873 | 1.599766805 | 1.010316595 | 1           |
|         | 1.376935461                                                                            | 1.053113536 | 1.248216223 | 1.296509256 | 1           | 1.542149789 |
|         | 1.686329728                                                                            | 1.844301915 |             | 1.218866701 | 1.461596842 | 0.985067874 |
|         | 0.746557332                                                                            | 0.807599951 | 1           | 1.235630645 | 2.590184727 | 2.488195208 |
|         | 1.990244714                                                                            | 2.008121202 | 1           | 1.15470426  | 1.823391922 | 1.26346773  |
|         | 0.725571376                                                                            | 1.178470306 | 1.294172311 |             |             |             |
| YDR094W | YDR094W::YDR094W::molecular_function unknown                                           |             |             |             | 1           | 1.395649094 |
|         | 1.551226701                                                                            | 0.94158996  | 1.194272353 | 1           | 1.17653748  | 1.067364091 |
|         | 1.302341307                                                                            | 1.390601488 | 1           | 1.622065749 | 1.341952906 | 2.326525577 |
|         | 1.197026537                                                                            | 1           | 1.244143077 | 0.659794065 | 1.105224442 | 0.873352418 |
|         | 1.096420789                                                                            | 1.907901229 | 1.143047748 | 0.591249194 | 1           | 1.049171299 |
|         | 0.910164414                                                                            | 0.891984214 | 0.83832304  | 0.640329725 | 1           | 1.032278777 |



1.424100532 1.343664053 0.981043886 1.469244913 1 0.948231333  
1.663913199 1.11025986 1.309288569 1.171095566 1.086649433  
YDR096W YDR096W::GIS1::putative zinc finger protein; repressor of PHR1  
transcription 1 0.889930427 0.957024843 1.112242069 0.677982185 1  
1.053051746 1.350927015 0.666566569 0.57273053 1 1.284927891  
1.162700945 1.285506681 0.798724123 1 1.157701779 1.97438006  
0.717258579 1 0.635899601 1.036433805 0.742583578 0.43380267 1  
1.055565377 1.038119685 0.889341398 0.746864226 1 1.002136008  
0.739979236 1.26518049 0.848033038 0.754002706 1 1.150555792  
0.801113009 1.032513685 0.487016522 1.507732062 0.710131055  
YOR343C YOR343C::YOR343C::molecular\_function unknown 1.122933745  
0.993049272 0.889882801 1.099341015 1.06323377  
1.148577085 0.981384461 1.11481196 1 0.355670171  
0.350715342 1.797972857 0.444444987 1 1.011946345  
0.804641369 1 1.03934224 1  
0.635017135 0.686242237 1.392979653 0.794256925  
0.961361093 0.463988489 1.107019671  
YOR345C YOR345C::YOR345C::molecular\_function unknown 1  
1.149338435 1.390857565 0.916859571 1 1.2269412 1.301266966  
1.168004033 0.910837749 1 1.181718691 0.975236163 0.754694104  
1.4180102 1 0.610873218 0.602849714  
0.566396844 1 0.745618712 0.60883322 0.652519586 0.899732748  
0.959520586 1 0.505873009 1  
1.104589073 0.938111036 1.634789994  
YOR359W YOR359W::VTS1::<u>vt</u>i1-2 <u>s</u>uppressor 1 1.167836338  
0.911876512 0.842546658 1 1.197122378 0.936240376  
0.966512301 1 0.71001845 0.754047303 0.688189613 0.869873875  
0.923925244 0.91667191 1  
0.715761719 0.565700599 0.641098175 0.834133488 0.777330484 1  
0.581604006 0.744488615 0.462888514 0.826527079 0.869492426  
0.448829032 0.818881603 1.012452977 1.148410057 0.617625197 0.963186421  
YOR361C YOR361C::PRT1::translation initiation factor eIF3 subunit 1  
0.958579229 0.762125087 1.07948702 0.667555384 1 1.037502292  
0.892515955 0.780723909 0.761478008 1 0.832619259 0.642510265  
0.461816041 0.828064677 1 0.609614504 0.500160655 0.540858742  
0.418013297 1 0.71481054 0.489540482 0.416919819 0.739165281 1  
0.840013982 0.71827117 0.755431934 0.862996246 0.852451614 1  
0.799220696 0.566409664 0.524752901 0.545686169 0.519215923 1  
0.868365742 0.710186017 0.815894294 0.689927086 0.63309707 1.042868171  
YOR363C YOR363C::PIP2::activator of peroxisome proliferation 1  
0.847985788 0.745087368 0.694815665 1 0.975114126 0.897238767  
0.731277007 0.676726649 1 0.959477661 0.954064973 0.544350922  
1.074083337 1.413757654 1.283555814 1.012220066 1  
0.997660247 1 0.956587061 1.187179434 1.042499531  
1.239410039 1 0.916375756 0.810296381 1.27637472 1.198332765  
0.766569247 1 0.843025826 1.123307001 1.222254199 0.702608592  
0.983712026 4.276547462  
YOR365C YOR365C::YOR365C::molecular\_function unknown 1 0.842431743  
0.861296721 1.052568415 1.143581518 1 0.862832848 0.893252787  
1.161773484 0.991169994 1 0.886658966 0.774866611 0.921498025  
0.940152843 1 0.738467231 0.872531963 0.277071752  
0.621729758 0.353318537 1 0.915027215 0.975941312 0.888045278  
0.782769573 1.063563796 1 0.900407105 1.049893746 1.072355098  
1.579139326 1 0.80317464 1.151554067 0.156781974 1.14817886  
1.551605689  
YDR098C "YDR098C::GRX3::Member of a glutaredoxin subfamily in Sc together  
with GRX4 & GRX5. Sign. sequence diff. with the other glutaredoxin subfamily,

formed by the previously described GRX1 & GRX2 glutaredoxins (Luikenhuis MBC 9:1081, 1998)" 1 0.87658018 0.933236828 0.934622469 0.903527331 1  
0.875586025 0.823591843 1.038289118 0.984894486 1 0.855845881  
1.076969561 1.034223858 1.093079817 1 0.966964898 0.819914786  
0.481640212 1 0.95605165 0.559140002 0.580460003 0.93753917  
1.094469289 1.094356799 0.974964564 0.967615915 1.137720818 1  
0.911088872 1.243220939 1.186850607 1.11983152 1.024461441 1  
1.00080093 0.939634341 0.945305571 0.674206088 0.888287466 0.909773366

YOR367W "YOR367W::SCP1::homolog of chicken calponin, thus the name S. cerevisiae CalPonin" 1 1.054917973 1.206026719 1.14199475 1.54220282 1  
0.988632679 1.016941388 1.493058443 1.318374718 1 0.998102635  
1.279589908 1.619212362 1.248299748 1 1.207916838 0.960697453  
1.193297746 1.183045425 1 1.618631813 2.213878945 2.799324401  
1.714531284 1 0.994246246 1.175915689 0.862684935 0.796948206  
0.987077758 1 0.906795512 1.182446645 1.141989354 1.088512503  
1.28738204 1 1.381807319 1.198910277 1.097902472 0.939195874  
1.369572906 1.373854061

YDR100W YDR100W::YDR100W::molecular\_function unknown 1 1.116094304  
1.191906541 0.910210638 1.264493632 1 0.86237873 0.975094872  
1.234039651 1.255618146 1 1.051529304 1.141070263 1.84912201  
0.933142191 1 1.664899932 2.70591748 1.792589107 1.590358214 1  
1.977803967 2.586883901 3.525367991 1.670098529 1 1.148151783  
1.282983983 1.021856739 0.972803303 0.900072903 1 0.805356635  
1.229810607 1.087373904 0.970110641 1.257448551 1 0.990977275  
1.089592449 0.927654003 1.156640138 1.436394034 1.328321573

YOR369C YOR369C::RPS12::Homology to rat S12 1 1.169771156 1.083062014  
0.777962594 1.156448585 1 0.927221332 0.833485451 1.463053658  
1.144873523 1 0.855729291 0.782508993 0.699567821 0.875194693 1  
0.992501582 1.343752748 0.203660563 0.656492678 1 1.787241592  
1.05515695 0.366607551 0.586761163 1 1.491391034 1.159202493  
1.481388818 1.414361415 1.766579153 1 1.26971798 1.124647531  
0.651461917 0.437169129 0.969251734 1 1.717183547 1.553585962  
1.207257066 2.069838868 1.661837845 1.264401061

YDR114C YDR114C::YDR114C::molecular\_function unknown 0.758472788  
0.89738857 0.865444992 0.884009004 0.727647541 0.787539902  
1.022196435 0.71493977 0.931848658 1.135846155 0.931997549 1  
0.775531119 1.308162623 0.700306109 1.014795441 1 1.345016835  
1.12194003 2.216273055 1.437808963 0.915291306 0.875301328  
0.904241751 0.780491782 0.889890967 1 1.408843836 1.423784788  
1.156981193 1.440936745 0.846525625 0.907332196 0.806000145  
1.084667527 1.065634415

YOR383C "YOR383C::FIT3::FIT1, FIT2, and FIT3 code for mannoproteins that are incorporated into the cell wall via glycosylphosphatidylinositol anchors." 1  
1.150494572 0.96828636 0.75504925 0.651184276 1 1.051157557  
1.007829339 0.94079136 0.772743718 1 2.078590287 1.764252437  
2.367288928 0.732460011 1 3.094578432 3.712367443 4.544398497  
2.333220887 1 2.074595832 2.263632317 2.014024683 1.510506523 1  
1.712304919 2.550391603 4.573358451 2.309596127 1.644237957 1  
2.48806567 9.396240566 14.59273989 34.14874626 7.585119839 1  
3.143132946 5.319517649 7.369739155 1.71611779 1.338829134

YDR116C YDR116C::YDR116C::molecular\_function unknown 1 0.793716521  
0.86340608 0.970486853 0.884595305 1 0.836129998 0.919322046  
1.03703804 1 0.851842215 0.8485648 0.930915643 1  
1.216826617 0.562371588 1.07097228 1 1.161163805 1.348776389  
1.564969642 1.467312134 1 1.105015478 1.111926557 0.960362415  
0.937809675 1.035591064 1 1.014116245 0.929543055 0.858903289

0.70390011 0.838703828 1 1.262254925 1.035358518 0.835526284  
 1.014989031 1.222821171 0.971942653  
 YOR385W YOR385W::YOR385W::molecular\_function unknown 1 0.747467703  
 0.674293349 0.815815657 0.696831826 1 0.672012853 0.68256051  
 0.696547846 1 0.876210543 0.884017847 0.862163845 1  
 1.034698538 0.467533046 0.811645846 1.404139463 1 1.31013606  
 1.670852539 1.210683564 1.439346192 1 1.157437499 1.048140525  
 1.16051818 1.167516463 1.253773593 1 0.93047044 0.986576699  
 0.743348433 0.923716302 1 1.215207829 1.332983885 0.898489979  
 1.05354487 1.280855567 1.063883189  
 YDR118W YDR118W::APC4::subunit of the Anaphase Promoting Complex; all known  
 APC subunits co-immunoprecipitate with epitope-tagged Apc4p 1.108158271  
 1.11148638 1.137154437 1.098403197 1.21557085 1.076414381  
 1.131532883 1.072996512 1.200809462 1.119064553 0.861233129  
 1.14933311 1 1.356638799 1.246802881 1.34628857 1  
 1.085132772 1.175669817 0.993687584 0.957476614 1 1.035357301  
 1.161017216 1.244160173 0.963559879 1.186834727 1 1.059090532  
 0.952688131 1.163496353 0.855890056 0.824905639 1 0.982341833  
 1.064563341 0.977165247 1.137029546 1.03936572  
 YDR120C "YDR120C::TRM1::N2,N2-dimethylguanosine-specific tRNA  
 methyltransferase" 1 0.741545862 0.54287386 0.595502265 1  
 0.66901014 0.614305894 0.741215311 1 0.677526837 0.392007903  
 0.238513567 0.897215439 1 0.454537207 0.290182917 0.387173684 1  
 0.525196185 0.362683896 0.658748449 1 0.840286556 0.625306391  
 0.723594181 0.943434881 0.999944825 1 0.746243909 0.406984605  
 0.436476168 0.918740586 0.620451338 1 0.569072972 0.356356244  
 0.685473021 0.674314433 0.372807788 0.633076143  
 YDR122W YDR122W::KIN1::Serine/threonine protein kinase 1  
 1.022737631 1.249610967 0.713883468 1 1.140980956 1.345754929  
 0.775381539 1 1.479703918 1.609589394 0.895303373 1.121987377 1  
 0.712866477 1.342506096 0.748000629 1 0.808948177  
 1.095939839 1 1.037316928 1.284944281 1.545781705 1.039710943  
 0.980707149 1 1.15956422 0.937187439 1.566851933 1.066972067  
 0.62152679 1 1.238610897 1.051763224 1.206879847 0.733820544  
 1.090332904 0.931663945  
 YDR124W YDR124W::YDR124W::molecular\_function unknown 1  
 1.081623196 1.204437237 1.142734086 1 1.033299298 1.069383788  
 1.174722878 1.084399926 1 1.23374111 1.400079425 1.422143534  
 1.137687527 1 1.087588498 1.707745829 1.357373048 1  
 1.101631042 2.103157731 1.780219246 1.466428083 1 1.081497777  
 1.167657435 1.245474031 1.046115692 1 1.079577708 1.330296631  
 1.564226692 1.217212576 1.691110787 1 0.98328142 1.25347429  
 1.164051519 0.310693388 1.429782634 0.889634012  
 YDR138W YDR138W::HPR1::Hyperrecombination protein that suppresses  
 intrachromosomal excision recombination 1 1.127717825 1.017175932  
 0.901454443 1 1.002540042 1.13282511 0.739824987 1  
 1.154196361 1.156651294 0.698906472 1.052201396 1 1.828293658  
 1.486959763 1.371890368 1 1.168578555 1.736027158 1.893512902  
 1.27218683 1 0.91751017 0.710655399 1.086106429 0.956665257  
 1.104292931 1 1.040086027 0.686534481 0.672442842 0.718094135  
 0.557460526 1 0.98437854 0.940029172 0.892956813 0.830040694  
 0.790688469  
 YDR140W YDR140W::FYV9::Function required for Yeast Viability on toxin  
 exposure 1 1.025717122 0.818824298 1.217274133 1 0.753930761  
 0.759482446 1.198671079 1.172759282 1 0.851659227 0.938970687  
 1.270231389 0.964670445 1 0.972206812 0.818735833 0.924473112  
 1.306850855 1 1.423100815 2.273322199 1.770314666 1.409908578 1

1.085787136 1.041364939 0.749748988 0.753552233 0.810921438 1  
0.908493365 1.386585857 1.182318715 1.196379958 1.80775506 1  
1.215051847 1.361576695 1.088730555 1.073035834 1.184595205 1.191724213  
YOR387C YOR387C::YOR387C::molecular\_function unknown 0.747391201  
0.872334557 0.751394102 0.949599958 0.763969347 0.853442825  
0.994937845 0.80777346 0.912809745 1.501607271 0.890880016 1  
1.34074192 0.649283831 0.513620576 0.475088596 1 1.66879798  
1.12343993 1.058340328 0.504689549 1 1.357491233 1.441217963  
1.312045908 1.456573997 1.457788916 1 0.986509269 1.33295789  
1.175796681 0.966598912 1.670834558 1 1.233329048 1.641033845  
1.541301717 1.400151218 1.78231286 1.257396055  
YOR389W YOR389W::YOR389W::molecular\_function unknown 1 0.617854341  
0.550490141 0.579376791 0.477225848 1 0.69998934 0.700186949  
0.723952765 1 1.066936185 0.801905625 0.668442712 0.945794256 1  
1.288357363 0.413268337 1.031295073 1.153192989 1 1.641768324  
1.110735387 1.207678817 1.666448264 1 1.151962726 1.482549177  
1.933872588 1.611812946 1.207939593 1 1.09176753 1.189734135  
1.554360341 1.472432257 0.667475413 1 0.971222893 1.035774257  
1.054734659 0.625953562 0.867987574 1.50432208  
YOR391C YOR391C::YOR391C::molecular\_function unknown  
1.291697231 1.463044602  
1 0.552035233 0.853908551 2.40053671 2.65199219 1 1.030716504  
3.307793502 2.344886621 1.925027862  
0.658327958 1 0.742120355  
0.231223509  
YOR393W YOR393W::ERR1::enolase homolog 1.414748823 0.941802511  
0.947069665 0.55115957 1.237363962 0.64791521 0.683942335  
1.391299381 1.433206555 1.280748285 0.641237767 1 1.297666898  
1.870418209 0.70068902 1 0.822755983 0.299562441 0.205788133  
0.532001161 1 0.76426463 0.698189412 1.041085039 1.082706475 1  
2.350793174 1.652508468 1.842473891 2.073377385 1.165133455 1  
0.689797476 0.306408237 0.991915046 0.081635976 0.650716681 0.935166396  
YPL013C YPL013C::YPL013C::molecular\_function unknown 1 0.692541139  
1.32700314 0.795151941 1.347223732 1 0.761913534 1.033023054  
1.48131536 1.35951447 1 0.862924535 1.160574166 1.593325238  
1.048238222 1 1.058472518 0.658253947 0.619022068 1.299296442 1  
1.884386861 2.802141588 1.768431123 0.871205531 1 0.734450027  
0.783897552 0.816111059 1.210870075 0.877086512 1 1.084713351  
0.758061008 1 0.927368297 1.317621868 0.7794775  
0.853992526 0.495758056  
YPL013C YPL013C::YPL013C::molecular\_function unknown  
0.854263542 0.81118778 0.914236197  
0.752314384 0.844058143 0.799299162 0.77633826 0.303874213  
1 1.075308607 1.275716964  
0.878464738 0.652221855 1.100106108 1 1.818065606 1.12447343  
1.650729463 2.024964744 1 1.133988096 1.708500651 1.144062779  
1.727859796 1.729914805 1.685576158  
YPL015C YPL015C::HST2::Homolog of SIR2 1 1.274947319 0.90945494  
0.77256086 0.492176718 1 1.048494519 1.022157075 0.592945866  
0.629880372 1 1.265313783 1.264556402 1.115915345 0.645250439 1  
1.497852183 1.005927479 0.662949245 1 1.194816005 0.774475528  
0.644823565 0.947072393 1 1.008853574 1.05638214 1.343917933  
0.934561223 1 0.923730061 0.852872076 1.084903613 0.920633238  
0.604502074 1 0.734333218 0.600637429 0.783089172 0.405750411  
0.570019404 1.016599476  
YDR142C YDR142C::PEX7::May serve as intraperoxisomal receptor for type 2  
peroxisomal proteins (such as thiolase) 0.957941282 1.076183002

0.891840772 0.995218448 0.916050579 0.930135989 0.941659748  
0.980178844 1.05031295 1.231668587 0.988778881 1 0.760516606  
0.613892947 0.686913769 0.946988016 1 1.200481443 1.185928706  
1.142987761 1 0.965986282 0.976653592 0.881047145 0.934582526  
0.954483093 1 0.914593846 1.003725825 0.827093654 0.811677952  
1.114470358 1 1.206790671 1.115474567 1.098103335 0.820538704  
1.405240427 0.917653933  
YPL017C YPL017C::YPL017C::molecular\_function unknown 1 1.121474255  
1.023260437 0.811441951 0.658320406 1 0.924246301 0.980629942  
0.846504246 0.921491845 1 1.040831954 1.185170473 1.363933911  
0.870027133 1 1.298442942 1.186724591 1.921277085 1.434442715 1  
1.109220762 1.942517628 1.444544195 1.261873531  
0.919138153 1 1.943779949 2.010680198 2.138307747  
1.656034113 1.012421885 5.998024316  
YPL017C YPL017C::YPL017C::molecular\_function unknown 1.033049777  
0.795001834 0.923167785 0.897149444 0.836967111 0.84268725  
0.977591483 0.698060923 0.701266358 0.851884582  
1 1.134796792  
1.245403174 1.208738896 1.128946515 1 0.660117291 0.726095749  
0.919951893 1.045095211 0.624618867 1 0.849150293 0.750665692  
1.115806494 0.405553414 0.69971784 1.939507085  
YDR144C YDR144C::MKC7::protease involved in protein processing that shares  
functions with Yap3 and Kex2 0.859438343 0.952051877 0.833018775  
0.785133124 0.79423759 0.860033098 0.938085846 0.811561995  
0.771604463 0.915982918 0.839030382 0.820392782 1 0.705319801  
1.760318481 1.250739822 0.856227795 1 0.596745015 0.724250218  
0.636722995 1 1.05225032 1.072799217 1.272937533 1.072106438 1  
0.867205797 0.700785411 0.810618177 0.84450467 0.697035577 1  
0.679337772 0.75126585 0.702145966 0.51956731 0.759510711 1.032360714  
YPL019C YPL019C::VTC3::Phosphate metabolism; transcription is regulated by  
PHO system 1 0.996742596 0.70839795 1.255569622 0.709995006 1  
1.098170308 1.00978809 0.90699567 0.798886584 1 0.778496616  
0.889283134 0.424856311 0.926905399 1 0.955720065 0.697570502  
0.797757884 0.576155306 1 0.566981799 0.649232774 0.399080557 1  
0.908478051 0.816508066 0.959295889 1.08210419 1.059311054 1  
0.976416498 0.554565782 0.82800194 0.768159225 0.469997699 1  
0.955486178 0.782844614 0.950077921 0.637018255 0.635591012 0.662847393  
YDR146C YDR146C::SWI5::transcriptional activator 0.83850644  
0.911054414 1.065593148 1.013232882 1.046069019 1.02808554  
0.758283898 1.030815383 1.093679419 0.709319554 0.889900981 1  
0.854859155 0.667693687 0.661428919 0.287853216 1 0.607233052  
0.769187765 0.76029369 0.313518392 1.031699926 1.055699906  
0.8941385 1.058754067 1.169297587 1 0.760624921 0.470889153  
0.514382354 0.793901588 1.056954036 1 0.749887814 0.552995874  
1.092300117 0.692312243 1.433925831 0.738151027  
YPL021W YPL021W::ECM23::ExtraCellular Mutant; similar to SRD1. Negative  
regulator of pseudohyphal growth. 1 1  
1 0.364840662  
0.255476489 1 1.16951114 0.95849551  
1 1.017745428 2.134244217 3.573053158 1.714364659 1  
1.554659111 1.904776134 1.89171409  
YPL023C YPL023C::MET12::Gene encodes mthfr which catalyzes step before  
methionine synthesis. 1 0.756761965 0.708590071 0.754477996 0.447371846 1  
0.934133709 1.009957977 0.584424281 0.621035866 1 1.025222494  
0.990116691 0.733677723 1 1.080955686 0.784637896  
0.549018034 1 1.971700756 1.310720861 1.363946939 1.540660437 1  
0.854217284 0.992639016 1.346250842 1.149610429 1.058867441 1

0.858948787 0.597995967 0.744282329 0.796859054 0.521369444 1  
 1.070856462 1.100212587 1.45970628 1.032543933 1.550242983 0.823962171  
 YDR148C YDR148C::KGD2::dihydrolipoyl transsuccinylase component of alpha-  
 ketoglutarate dehydrogenase complex in mitochondria 1 0.86354028  
 0.900179725 1.141626095 0.831674286 1 1.100105128 1.246998098  
 1.028598749 1 0.823357843 1.027673553 1.244043834 1.039377 1  
 1.906035271 1.419128145 2.226723107 1.535783279 1 1.542198767  
 1.023637276 1.424914249 2.162073508 1 0.969518093 0.798059639  
 0.938605307 1.09431793 1.022508916 1 0.915895493 0.525558536  
 0.653586432 0.620571803 0.539455023 1 0.86795748 0.611347839  
 0.67327006 0.776011296 1.428212909 0.854609034  
 YDR162C "YDR162C::NBP2::interacts with Nap1, which is involved in histone  
 assembly" 1 1.552910532 1.161533903 1.331063 1.121540607 1  
 1.094948758 0.974304434 1.406920492 1.437370858 1 1.092081812  
 0.683045901 0.977472824 1.439787761  
 1 0.93012831 1.039282524 1.137672657  
 1.179671927 1 1.090683817 0.901781633 1.236529491 1.316436392  
 1.218984266 1 0.778011374 0.907598646 0.953815129 1.003594116  
 0.588248243 0.911524592  
 YDR164C YDR164C::SEC1::Hydrophilic protein involved at the late stage of  
 secretion 1 0.773518021 0.803985028 1.089320428 0.839112542 1  
 0.970059074 1.0595092 0.887946828 0.815187798 1 0.842727221  
 0.899217153 0.65753878 1.094033534 1 1.282826575 1.382971383  
 0.901281282 1 1.532368544 1.241844766 0.768848629 1.150463275 1  
 0.876650747 1.001882284 0.930496965 0.907196557 0.981580966 1  
 0.99060661 0.926764728 0.847045672 1.229891182 0.778813341 1  
 1.029899133 0.953979604 1.115829358 0.918595962 0.887016676 0.655842387  
 YDR166C YDR166C::SEC5::107 kDa component of the Exocyst complex; required  
 for exocytosis. 1 1.148276272 1.130513211 1.29594421 1.24484396 1  
 1.257656929 1.199971271 1.133952975 0.966873929 1 1.095046816  
 1.213728415 0.928334361 1.381379246  
 1 0.949224019 0.984108431 1.001002666 1.002282888  
 1.007680184 1 1.080757964 1.012526238 0.75126394 0.965409782  
 0.838100532 1 1.082658993 0.926644429 1.111762603 1.00677635  
 0.918646519 0.865116491  
 YDR166C YDR166C::SEC5::107 kDa component of the Exocyst complex; required  
 for exocytosis.  
 1 0.742452206 0.943805018 1.058355033 0.982482234 1  
 1.152681323 0.781295944 0.888525934 1.167104228 1 1.287497627  
 1.254147835 0.802869166 1.410270263 3.808088756  
 YDR168W YDR168W::CDC37::cell cycle protein necessary for passage through  
 START 1 0.715729164 0.980056458 1.302228704 0.801124043 1 0.972062844  
 0.898843813 1.048771445 0.929655618 1 0.91702552 1.381199439  
 1.421168399 1.33691567 1 0.919169848 1.392966547 2.387602168  
 0.762462681 1 0.6055142 0.744780804 0.596886135 0.399208108 1  
 1.183977762 1.507043347 1.137135159 1.876944687 1.538665225 1  
 0.833706233 0.395061483 0.687264642 1.3525796 0.27480041 1  
 0.423491775 0.323421242 0.385145553 0.20501774 0.59456599 0.359005837  
 YDR170C YDR170C::SEC7::Involved in protein transport at multiple stages of  
 the secretory pathway 1 1.409860193 1.255970207 1.426277786 1  
 1 1.40527083  
 0.707581825 0.613907463  
 0.738800934 1.017154901 1 1.14302673 0.980358807 1.52827845  
 0.964489187 0.787031036  
 YDR170C YDR170C::SEC7::Involved in protein transport at multiple stages of  
 the secretory pathway

|          |                                                                                                 |             |             |             |             |             |             |
|----------|-------------------------------------------------------------------------------------------------|-------------|-------------|-------------|-------------|-------------|-------------|
|          |                                                                                                 | 1           | 0.934899653 | 0.987074526 | 1.101414233 | 1.150942601 |             |
|          | 0.928455287                                                                                     | 1           | 1.077180961 | 0.79278812  | 0.703895639 | 0.950713223 |             |
|          | 0.462918491                                                                                     | 1           | 0.944913163 | 0.955601997 | 1.027469426 | 0.855099354 |             |
|          | 0.817198952                                                                                     |             | 0.664598619 |             |             |             |             |
| YDR172W  | YDR172W::SUP35::altered form creates [PSI] prion                                                |             |             |             |             |             | 1           |
|          | 1.472224039                                                                                     | 1.234786823 | 1.472041636 |             | 1           | 1.303257764 | 1.396040613 |
|          | 1.222492699                                                                                     |             | 1           | 1.28831333  | 1.433979239 | 1.177193656 | 1.717430823 |
|          |                                                                                                 |             |             |             |             | 1           |             |
|          | 0.979790591                                                                                     |             | 0.877170803 | 1.223348927 | 1           |             | 0.79189387  |
|          | 1.181760287                                                                                     |             | 1           | 0.967497389 | 0.904146563 | 1.006009194 | 0.77440795  |
|          | 0.942585146                                                                                     |             | 1.021853256 |             |             |             |             |
| YFL035CA | YFL035CA                                                                                        | 1           | 0.887908992 | 1.076259585 | 0.981242904 | 1.369954756 | 1           |
|          | 0.870488862                                                                                     | 0.863860454 | 1.384229368 | 1.344881377 | 1           | 0.565826105 |             |
|          | 0.72420989                                                                                      | 0.842679456 | 0.93884727  | 1           | 0.296369965 | 0.371036631 |             |
|          | 0.433195325                                                                                     | 0.722179082 | 1           | 0.582659112 | 1.017303007 | 1.048514805 |             |
|          | 0.711303267                                                                                     | 1           | 0.735956259 | 0.787060896 | 0.514396227 | 0.746593619 |             |
|          | 0.863332705                                                                                     | 1           | 0.658578305 | 1.431090755 | 0.656091047 | 1.136992372 |             |
|          | 2.082669316                                                                                     | 1           | 0.752753457 | 1.107118091 | 0.94512938  | 1.81059892  |             |
|          | 1.040375477                                                                                     |             | 1.300301653 |             |             |             |             |
| YMR158WA | YMR158WA::YMR158W-A::molecular_function unknown                                                 |             |             |             | 1           |             | 1.294202028 |
|          |                                                                                                 | 1           | 1.590291368 | 1.608450195 | 1.522449689 | 1           |             |
|          | 1.513544032                                                                                     | 2.328439167 | 1.729966497 | 1.784104516 |             | 0.572390349 |             |
|          | 0.638504932                                                                                     | 0.852117547 | 0.676647127 | 1           | 0.975095836 |             | 1           |
|          | 0.995344494                                                                                     | 1.02296431  | 0.914021104 | 0.905628088 | 1.060486626 | 1           |             |
|          | 1.176174341                                                                                     | 1.307805079 | 0.949797092 | 1.378820281 | 0.946652584 | 1           |             |
|          | 1.267214484                                                                                     | 1.171808985 | 1.220746222 | 1.166293127 | 1.052045404 | 1.197853659 |             |
| YAL035CA | YAL035CA::YAL035C-A::molecular_function unknown                                                 |             |             |             | 1           |             | 1.250299846 |
|          | 1.293877473                                                                                     | 1.253187664 | 1.283737776 | 1           | 1.255215494 | 1.171239781 |             |
|          | 1.285851385                                                                                     | 1.121784545 | 1           | 1.204272611 | 1.106596664 | 1.147886466 |             |
|          | 1.107651899                                                                                     | 1           | 0.707827234 | 0.381963826 | 0.485738405 | 0.71394292  | 1           |
|          | 1.197626627                                                                                     | 1.055839612 | 0.769298331 | 0.770987147 | 1           | 0.714693664 |             |
|          | 0.615571784                                                                                     | 0.560108056 | 0.611466036 | 0.809715572 | 1           | 1.149399207 |             |
|          | 1.112829136                                                                                     | 0.854577318 | 2.281554886 | 1           | 1.183527807 | 1.647252598 |             |
|          | 1.255746634                                                                                     | 1.632000297 | 1.580057313 | 1.086649433 |             |             |             |
| YKL096W  | "YKL096W::CWP1::cell wall protein, involved in O and N glycosylation, acceptor of B1-6 glucan." |             |             |             | 1           | 1.128099954 | 1.210371335 |
|          |                                                                                                 | 1           | 1.128099954 | 1.210371335 | 1.092243589 |             |             |
|          | 1.025368139                                                                                     | 1           | 1.39358793  | 1.697808425 | 0.950993625 | 1.187100489 | 1           |
|          | 0.84539397                                                                                      | 0.962078935 | 2.00599178  | 0.81707324  | 1           | 2.26355905  |             |
|          | 1.504681978                                                                                     | 2.959509482 |             | 1           | 0.882883449 | 0.803610109 | 1.30389166  |
|          | 0.82065197                                                                                      | 1           | 1.081718707 | 0.805986376 | 0.920712623 | 0.872048627 |             |
|          | 1.263438622                                                                                     | 1           | 1.391993209 | 1.035457495 | 1.14345326  | 0.476647244 |             |
|          | 0.294924719                                                                                     | 1           | 1.067626612 | 0.744945933 | 0.365558072 | 0.72100049  |             |
|          | 1.271302231                                                                                     |             | 0.791564082 |             |             |             |             |
| YAL068C  | YAL068C::YAL068C::molecular_function unknown                                                    |             |             |             | 1           |             | 2.278262374 |
|          | 2.028668613                                                                                     | 1.736541053 | 2.108726257 | 1           | 1.945524369 | 1.653795666 |             |
|          | 1.809463592                                                                                     |             | 1           | 1.820472133 | 1.699650293 | 2.413921348 | 1.617426123 |
|          |                                                                                                 | 0.371187569 |             | 1           | 0.653757428 | 0.630841714 | 1           |
|          | 1.070213219                                                                                     | 1.258066865 | 1.053882175 | 0.976991677 | 1.007289217 | 1           |             |
|          | 1.030463702                                                                                     | 1.307801407 | 1.556649528 | 0.973803401 | 1.462772666 | 1           |             |
|          | 1.028463281                                                                                     | 1.489917026 | 1.313000012 | 1.125065698 | 1.272401377 | 1.337077805 |             |
| YKL097WA | YKL097WA                                                                                        | 1           | 2.008967379 | 1.911347826 | 1.051377808 | 2.453460149 | 1           |
|          | 1.273084607                                                                                     | 1.270170017 | 1.500391833 |             | 1           | 1.346959007 | 1.134918064 |
|          | 1.87857132                                                                                      | 1.177882897 | 1           | 0.781901454 | 0.482535965 | 0.821706028 |             |
|          | 1.105551233                                                                                     | 1           | 0.527527569 | 0.955753897 | 0.850942189 | 0.594542639 | 1           |
|          | 2.42516108                                                                                      | 1.540720637 | 0.699284544 | 1.681027255 | 1.337853014 | 1           |             |

0.978702783 0.639329746 1.827052065 1 1.062885464 0.930871062  
 1.809624015 1.361484677 1.320441006  
 YKL099C YKL099C::UTP11::part of small (ribosomal) subunit (SSU) processosome  
 (contains U3 snoRNA) 1 1.040584579 1.049931538 1.124832789 1.580653465 1  
 0.870600328 0.825416538 1.234287957 1.494830375 1 0.561554536  
 0.516784327 0.558318161 1.211663205 1 0.537250107 0.365373093  
 1 0.648888037 1 0.48813722 0.471073127  
 0.37361587 0.455193179 0.633623721 1 0.995591354 0.960351958  
 1.057890336 1.373080547 1.558559806 1 0.664937304 0.731505764  
 0.782446274 1.614682817 0.40597525 0.827464674  
 YKL101W YKL101W::HSL1::Histone Synthetic Lethal<br> Negative regulator of  
 Swe1 kinase 1 1.035973441 1.0434891 1.239766932 1.26598408 1  
 1.027959205 1 0.865703727 0.978929625 1.480189727  
 1.190410383 0.746434219 0.415827879 0.778955919 1  
 0.884374718 0.973972175 1.089372945 1 1.058121063 0.865666932  
 0.918376307 0.821078721 1.0453909 1 1.22690878 0.955192259  
 1.465081872 1.228281507 0.67807023 1 0.909653167 1.072640766  
 1.002995739 0.968618004 0.830436655 1.483307061  
 YKL103C YKL103C::LAP4::vacuolar aminopeptidase ysc1 1 0.820373295  
 1.160214814 1.500299418 1.029885175 1 1.271463431 1.812324408  
 1.269165988 1 5.378193748 7.988222022 4.67581734 2.17725798 1  
 10.03661539 10.03243583 9.336890224 3.322536381 1 5.490371679  
 3.578319687 3.430757849 1.995221186 1 4.523701938 11.43571427  
 14.20138098 2.413343848 1.476099502 1 6.409216697 12.9499252  
 34.53715065 19.89241223 2.391259171 1 8.085493725 11.39105295  
 12.26809123 1.526369302 3.203445404 1.359844049  
 YKL105C YKL105C::YKL105C::molecular\_function unknown 1 1.219746655  
 1.870687548 1 1.432503843 1.843920171 1.637099294 1  
 1.189529131 1.404562287 1.491242127 1.570421546  
 1 1.418021043 1.185271326 1.030695182  
 0.880827643 1.089760339 1.152004758 0.73264965 1.207502172  
 0.972665552 0.584409837 1 1.08904568 0.920021074 1.005851947  
 0.888372291 0.979777215 1.61377508  
 YKL119C "YKL119C::VPH2::Required for the biogenesis of a functional vacuolar  
 ATPase (V-ATPase), but not part of the final enzyme complex." 1  
 1.103248276 1.302848456 0.951903891 1.795898072 1 0.957677864  
 0.87004004 1.281937393 1.393957329 1 0.883605113 0.892187298  
 1.131910107 1 0.779153832 0.564230122 0.701934724 1.042956659  
 0.523875136 0.812944687 0.435940726 1 1.006403031 1.230059185  
 0.968971395 0.812332232 1.004704957 1 1.139482561 1.59005246  
 1.479858797 1.166139122 1.524166798 1 1.446272129 1.9242946  
 1.349024133 1.604383462 1.594531941 1.476302055  
 YKL121W YKL121W::YKL121W::molecular\_function unknown 1 1.273442338  
 1.343056962 1.622498332 1.455361202 1 1.53637429 1.581318986  
 1.221516245 1 1.384120408 1.570925453 1.228522963 1.34675895 1  
 1.630858685 1 1.609733735 1 1  
 1.088054392 1.157432166 0.970741558 0.840485313 1.01995321 1  
 0.862506096 0.619984848 1.040131879 0.934872691 0.603158544 1  
 1.182136184 0.943822596 1.01482338 1.056408562 1.127988269 0.892260903  
 YKL123W YKL123W::YKL123W::molecular\_function unknown 1 1.531814523  
 2.069775923 1.452120094 2.263745592 1 1.415326166 1.355223972  
 1.841696011 1 1.479323044 1.494580125 3.130922299 1.590501735 1  
 1.182480708 1.08311161 1.188278403 1.30505705 0.410950934  
 0.720133029 0.74146369 0.394629648 1 1.042418629 1.11510325  
 0.881518218 0.722195453 1.047654098 1 0.885493028 1.185412788  
 1.390567909 1.175673178 1.710702971 1 1.156708588 1.323141227  
 1.283602745 2.017861293 1.851257832 1.354590372



YKL125W YKL125W::RRN3::Required for transcription of rDNA by RNA Polymerase  
 I 1 0.764005254 0.8123375 0.978055177 1.038057357 1 0.825158446  
 0.803701198 0.887513553 1.159427629 1 0.569634609 0.696109198  
 0.707497572 1.030710448 1 0.774344198 0.589766171 0.853935624  
 0.957158968 1 0.71328197 0.778556555 0.759179186 0.900727333 1  
 0.660344359 0.881526223 0.857390062 0.828263777 0.87684568 1  
 0.827243741 1.225778145 1.001088836 1.100301228 0.880039962 1  
 0.684093576 0.875438359 0.861181138 1.08891452 0.562416975 0.830091564  
 YPL037C YPL037C::EGD1::beta subunit of the nascent-polypeptide-associated  
 complex (NAC); homologous to human BTF3b; GAL4 enhancer protein 1  
 1.853778368 2.232500807 1.530625606 2.660473947 1 1.649223066  
 1.456814878 2.606352174 2.095832725 1 1.60176465 1.573500177  
 1.887633903 1.750289712 1 0.676910193 0.493986876 0.451804627  
 0.896062337 1 1.389529693 1.613502836 1.353126464 1.065013613 1  
 1.014075211 0.97562406 0.729043703 0.849720205 0.815344231 1  
 1.075873996 1.606077364 1.00566505 0.76823178 1.717567509 1  
 1.092634989 1.230214407 0.972043031 1.57409717 0.979939168  
 YPL039W YPL039W::YPL039W::molecular\_function unknown 1 0.969813033  
 1.040115817 1.130988194 1.211692244 1 1.012387921 1.359230072  
 1.34817766 1 0.916413163 0.852093726 1.067285536 1.579685215 1  
 0.726448376 1.126407768 1.272914314 1 1.301633894 1.613011222  
 1.100788415 1 0.932058561 0.927285966 1.04050328 1.137249572  
 1.082321341 1 0.84257349 0.811904587 0.823268492 1.036450068  
 1.619271416 1 0.913093819 0.730663198 1.127013542 0.732502772  
 1.082239075 0.927285829  
 YPL041C YPL041C::YPL041C::molecular\_function unknown 1 1.536567107  
 1.180916289 1.019542835 1.205354499 1 0.963981219 0.950463776  
 1.332899163 1.274490899 1 1.306243599 1.024956839 1.534901021  
 1.116696854 1 0.993741651 1.144501019 1.13878304  
 0.394652597 0.297446257 0.719655926 0.236995206 1 1.095130045  
 1.038204166 0.965748036 1.336782365 0.860641133 1 0.82228636  
 1.000314748 1.137210813 0.918447467 1.333561673 1 1.222359959  
 1.084665713 1.162068071 0.914708053 1.115545019  
 YPL043W YPL043W::NOP4::RNA recognition motif-containing protein 1  
 0.670615418 0.635882257 0.835145141 0.709979026 1 0.730257355  
 0.695818349 0.817353767 0.910215537 1 0.449373372 0.337702787  
 0.296280634 1.030339283 1 0.191205585 0.295794552 0.362524222 1  
 0.42864214 0.41328089 0.565989809 1 0.652443905 0.555964966  
 0.552441002 0.765858227 0.855083511 1 0.83846569 0.643541509  
 0.5681806 1.044578889 0.77830026 1 0.572440053 0.588200284  
 0.716071323 0.882829863 0.385529426 0.628698027  
 YPL043W YPL043W::NOP4::RNA recognition motif-containing protein 1  
 0.547666934 0.512293548 0.678822524 0.645459643 1 0.58679907  
 0.515693604 0.574458525 0.812746866 1 0.385941663 0.280377742  
 0.228383395 0.807665719 1 0.258682023 0.152971785 0.266574815 1  
 0.28746519 0.293097587 0.306908741 0.470862258 1 0.601832381  
 0.468587525 0.530880093 0.663634484 0.744565868 1 0.569080897  
 0.408638536 0.368567035 0.902360604 0.92689469 1 0.489447944  
 0.495874961 0.81494892 0.839254898 0.505979435 0.840599021  
 YPL045W YPL045W::VPS16::vacuolar sorting protein 1 0.780988717  
 0.838779194 0.976637603 0.973834636 1 0.935580809 0.956376101  
 0.73973137 1 0.81172735 0.876196979 0.829299759 1.030691015 1  
 1.091202816 1.134708442 1.042173423 0.813503142 1 1.382447571  
 1.98969169 1.299923476 1.0792683 0.905019953 0.986669897  
 1.005428478 1.043947315 1 1.092920565 0.949051114 0.956858551  
 1.366653992 1.22783467 1 1.193142237 1.103037796 1.207952936  
 0.957807441 1.136240229 1.101535006

YPL047W YPL047W::YPL047W::molecular\_function unknown 1 1.153619053  
1.135731703 0.949063425 1.236351664 1 1.04372523 0.969420456  
1.279795881 1.368809201 1 1.072812041 0.971841678 1.296612378  
1.237558982 1 0.98356143 0.519197676 0.605100144 1.111065658 1  
1.662003997 0.639675323 1.696491833 1.384388383 1 1.029272096  
1.213114031 1.268754787 1.289732764 1.362779193 1 0.921599317  
1.197874026 1.181616706 1.017838957 1.189625165 1 0.934312808  
0.857970772 1.03359118 0.588198377 1.090532288 1.465794598  
YDR186C YDR186C::YDR186C::molecular\_function unknown 1 1.635854771  
1.646792581 1.730874788 1.95348476 1 1.476761575 1.233462249  
1.464183962 1 1.364316596 1.562408969 1.768546407 1.364930226 1  
1.274692057 1.215081467 1.175393157 1.148229472 1 0.935413647  
1.972304394 1.214870995 1 1.266961903 1.244471131  
1.270132509 1.140608774 1 1.234196117 0.878294464 1.406247733  
1.027558016 0.883461984 1 0.750350787 0.796508249 0.734910419  
1.041532297 0.770863904 1.053375628  
YPL061W YPL061W::ALD6::Utilizes NADP+ as the preferred coenzyme. Activated  
by Mg2+. 1 1.098882184 0.929793231 1.157892809 0.687226498 1  
1.236442603 1.366286676 0.696703407 0.671451014 1 0.884076611  
0.850335786 0.754486948 0.613701381 1 3.369407216 6.295951189  
2.412448728 1 1.540278383 1.101012735 1.93543953 2.637140587 1  
0.693491582 0.640810102 1.14428884 0.760911369 0.697985549 1  
0.50497478 0.493503739 0.881383738 0.501312287 0.332066074 1  
0.745995895 0.708790893 1.968557621 0.841078851 1.200285146 0.776678509  
YDR188W "YDR188W::CCT6::cytoplasmic chaperonin of the Cct ring complex  
(previously called TCP1 or TRiC), distantly related to Tcp1p and to Hsp60" 1  
1.030683251 0.896923271 0.999749245 0.684810417 1 1.102838121  
1.061307515 0.907256416 1 0.952579055 0.904909234 0.868405027  
0.807994295 1 1.171318103 1.022635652 1.035967258 1.011807084 1  
0.766990079 0.726312469 0.614059488 0.774913195 1 0.978901009  
0.853422348 1.009019534 1.067441368 1.019280218 1 0.833198658  
0.658993431 0.764134244 0.713035874 0.593871987 1 0.775147262  
0.631930375 0.9494798 0.768460175 0.659098716 0.851982143  
YPL063W YPL063W::YPL063W::not yet annotated 1 0.928752417 0.965777791  
1.002081616 0.707007897 1 1.032897335 1.107763208 0.878553463  
0.759812174 1 0.972539683 0.824632365 0.78076248 0.758291777 1  
0.892057264 0.829808308 0.627119502 0.764987646 1 1.104372947  
0.666254173 1.021496651 1.121546679 1 0.953769992 0.91784997  
0.887011865 0.915866549 0.851425034 1 0.852617931 0.721193953  
0.736827025 0.637264605 0.689349443 1 0.872602694 0.816681914  
0.917652044 0.770996437 0.779334751 1.186470537  
YPL065W "YPL065W::VPS28::soluble, hydrophilic protein involved in transport  
of precursors for soluble vacuolar hydrolases from the late endosome to the  
vacuole" 1 0.904081036 1.235305232 1.073517649 1.571727727 1  
0.996560102 0.868845382 1.486292461 1.209450189 1 0.977487513  
0.998532007 1.271899874 1.316847253 0.839505841 0.658189132  
0.589596464 0.870564289 1 1.322642681 1.266450984 2.781024411  
1.450348904 1 0.971190914 1.1813515 0.686212178 0.614106689  
1.056203064 1 0.852803792 1.44665972 1.521904968 1.422773552  
2.192699705 1 1.240533886 1.296103794 1.348694125 1.27703131  
2.199191113 1.513078311  
YDR190C "YDR190C::RVB1::RUVB-like protein, TIP49a Homologue" 1  
0.787311385 0.740693411 0.922877171 0.890956594 1 0.81406116  
0.745416753 1.0717602 0.920576832 1 0.606320717 0.653091223  
0.476745062 0.862555816 1 1.040422679 0.463976837 0.690839577  
1.1969457 1 0.755984584 0.495646567 0.704779952 0.891559442 1  
0.969937507 0.986465617 1.100257883 1.054813326 1.254371608 1

1.072313563 0.789202218 1.133924136 0.947890558 0.742612654 1  
1.00438019 0.682572845 0.907283727 0.883787651 0.644911632 0.769673503  
YPL067C YPL067C::YPL067C::molecular\_function unknown 1.480007001  
1.198036588 0.968314432 0.681362404 1.031540254 1.121448052  
0.947360665 0.904489004 1.217688309 1.216374525 1.328659501  
0.770464343 1 0.77738815 0.577875488 0.837999747 1  
1.320751926 1.424861886 1 1.066899352 0.920026862  
1.190841422 1.244802875 0.910982333 1 0.672421191 0.535728602  
0.665894123 0.639849087 0.558569906 1 0.705840736 0.569090356  
0.975462188 0.25150232 1.009009258 0.800320314  
YDR192C YDR192C::NUP42::interacts specifically with the HIV-1 Rev protein  
effector domain; <br> Ulp1 Interacting Protein 1 1 0.968894887  
0.896131396 0.916068581 0.928834689 1 1.004985895 1.003335306  
0.874918062 1 0.919133934 1.01392786 1.016997504 0.961512465 1  
0.766633738 0.911683953 1 1.091617424 1.008930052  
0.731479065 1 1.118742951 1.004865251 0.932188332 0.875652141  
1.030457761 1 1.04903803 1.112652516 1.271213372 0.929316751  
1.165270459 1 1.130483221 1.392805582 0.933523708 1.2940543  
1.069998437 1.008718805  
YDR194C YDR194C::MSS116::Mitochondrial RNA helicase of the DEAD box family  
1 0.599601194 0.621181973 1.046422631 0.888208504 1 0.798745627  
0.932305319 0.705604336 0.766010025 1 0.631387008 0.558959922  
0.487196168 0.664505416 1 0.831436939 0.645487015 0.7578625  
1.03303509 1 0.773168274 0.975641434 0.932282865 0.848133792 1  
0.874127434 0.862201031 0.896145844 1.202732363 1 1.146887258  
0.845234157 0.720367506 0.713729266 0.511512169 1 1.001087497  
0.910851754 1.035832247 0.645334878  
YDR196C YDR196C::YDR196C::molecular\_function unknown 1 0.693504472  
0.955287889 0.805579902 1.13175289 1 0.814054826 0.810641711  
1.200903378 1.119560693 1 0.653408923 1.00464486 1.301224977  
0.95884065 1 1.692809316 1.392808886 1.537552085 0.986957882 1  
1.603413766 1.750146942 2.890363872 1.147293924 0.884477248  
0.749661876 0.700988255 1.079351636 1 1.208832131 1.521955901  
1.423032595 1.23154904 1.746933333 1 1.36296676 1.324768158  
1.011811403 1.886418242 1.506262807 1.120798695  
YAR002CA YAR002CA::ERP1::Emp24p/Erv25p related protein 1 1.997752471  
2.121083923 1.930985665 2.162792439 1 2.080106601 1.728407644  
1 1.564901901 1.610347371 1.662236144 2.138901732 1  
1 0.772731843 1 1.299951995 0.929053629  
1.092334475 1.505041389 1.082170366 1 1.026519911 0.728075219  
0.954302723 0.845661288 1.205232912 1 0.881664307 0.996477459  
0.878488861 0.896462973 0.716955448  
YDR210W YDR210W::YDR210W::molecular\_function unknown 0.853281914  
1.077321805 0.752512233 1.474327355 0.767601556 0.741407863  
1.107683313 1.016001311 0.733024232 0.892713129 0.813321913  
0.907522789 1 1.136982335 1.118740308 0.598102857 1.682453975 1  
1.717437512 1.803906021 1.894102906 1.493403567 1 1.135000817  
1.252794818 0.619660106 0.809759496 0.875394987 1 1.227523791  
1.555777455 1.161670815 1.771814851 1 1.155384054 1.419470533  
0.905683967 2.026124023 1.144849511 1.102410567  
YMR251WA YMR251WA::HOR7::hyperosmolarity-responsive gene 1 1.440775133  
1.884805808 2.055542581 1 1.567306586 1.943166316 1.924320989 1  
1.584386676 1.77948152 2.417303742 1.877743757 1 1.333529918  
1.567316314 2.115370365 2.186665727 1 1.400627451 1.575040009  
2.575891662 0.914983437 1 1.144138408 1.197797155 1.147604584  
1.092124005 1.234400109 1 1.070793096 1.439494181 1.449713896

2.036134356 2.357835256 1 1.075884659 1.242282684 1.09144631  
 1.986334586 3.531368318 1.618153195  
 YDR212W YDR212W::TCP1::tailless complex polypeptide 1 1 1.17254836  
 1.04058414 1.353638406 1.11846903 1 1.272779475  
 1.136925185 1 1.209797681 1.11281947 0.93983511 1  
 1.065339129 0.991961809 1.461814476 0.689186873 0.715660144  
 1 0.821189161 0.868222078 1.046458307 0.971963207  
 0.84590898 1 0.892606108 0.887344739 1.156037606  
 1.089081534 0.785434741  
 YDR214W YDR214W::AHA1::Activator of Heat Shock Protein 90 ATPase 1  
 0.856298222 1.132102006 1.171731479 0.95253338 1 0.981269177  
 1.213613663 1.184330958 1.125806934 1 0.922429396 1.230074528  
 2.089041179 0.854404802 1 1.70391941 1.682652706 3.041460514  
 3.27239602 1 1.523863755 1.764607085 3.181557114 2.868053453  
 1.156944029 0.803761091 0.854486702 1 0.570785297  
 0.428265053 1 1.229849692 0.79170235 0.402105669 0.64106793  
 0.517701807 0.83184279  
 YDR216W YDR216W::ADR1::Positive transcriptional regulator of ADH2 and  
 peroxisomal protein genes 1 1.526620281 1.81987494 1.170688514  
 2.268899542 1 1.228375701 1.192720069 1.73512595 1.588426831 1  
 1.025851166 1.338846645 1.371204106 1.128126327 1 0.619740151  
 0.359335293 0.246911861 0.87034652 1 1.568952878 1.522295194  
 0.756144889 0.723026181 1 0.763236249 0.688083046 0.435078733  
 0.522102909 1.000376225 1 1.177580957 1.948635027 1.046610471  
 0.937119973 1.789445308 1 1.405139893 1.785529353 2.751742414  
 1.480213641 1.31606289  
 YKL127W "YKL127W::PGM1::phosphoglucomutase, minor isoform" 1  
 1.013690095 0.836548985 0.975429745 0.664328953 1 1.084346145  
 1.010212349 0.742811052 0.737303826 1 1.005027977 0.943663757  
 0.744685678 0.837172739 1 1.336154851 0.857275875 1.06890511  
 0.744850462 1 1.091761864 0.641256659 0.511068044 0.473432261 1  
 1.316853447 1.249351791 1.422826748 1.478749117 1.006713257 1  
 1.090352911 0.882390631 1.628625421 0.842178621 0.441760048 1  
 1.141676098 0.821615463 0.498879254 0.833137339 0.607687526 0.726767905  
 YKL129C YKL129C::MYO3::myosin I 1 1.066244684 1.138183512 1.186505943  
 1 1.053873773 1.142124403 1.055231956 1 0.998047912  
 1.231535993 0.983093412 1.184894085 1 1.005897478 0.843880299  
 0.887554582 1.104058993 1 1.203743781 1.102615247 0.849055521  
 0.509249761 1 0.900350424 1.195278766 0.927009258 0.984749806  
 1.163324257 1 1.157928135 0.792489077 1.112932597 1.006147312  
 0.803289282 1 1.083840444 1.140041948 1.36364849 1.154475414  
 0.972818213  
 YKL143W YKL143W::LTV1::Protein required for viability at low temperature 1  
 0.70432755 0.665345453 0.81879472 0.872354369 1 0.550747608  
 0.576996395 0.875990649 1.233197122 1 0.49211367 0.283517992  
 0.286358399 1.009559705 1 0.293226796 0.195616847 0.419297136 1  
 0.496264867 0.326148111 0.141951003 0.405611529 1 0.619279614  
 0.456267116 0.463656815 0.65907305 0.7083957 1 0.75048155  
 0.571443829 0.495438337 1.221509191 0.955104823 0.822663798  
 0.681925773 0.978044182 1.615481486 0.471748021 0.80995221  
 YKL145W YKL145W::RPT1::Required for degradation of ubiquitinated substrates  
 and for anaphase chromosome separation 1 0.86351585 0.953009731  
 1.276078263 1.04774462 1 0.987141063 1.082211892 1.003333693 1  
 0.963533858 1.319747592 1.0658903 1.037235723 1 0.994400824  
 1.102396265 1.183808715 1.427573496 1 1.26242809 0.866478989  
 1.326499574 1.314860771 1 1.165200814 1.308878878 1.652340994  
 0.957158474 1.429232785 1 1.195560199 1.509456274 2.429172777

|         |                                                                      |             |             |             |             |             |             |             |
|---------|----------------------------------------------------------------------|-------------|-------------|-------------|-------------|-------------|-------------|-------------|
|         | 1.433458993                                                          | 0.46484263  | 1           | 1.610519086 | 1.404012805 | 1.657085655 |             |             |
|         | 1.05976387                                                           | 0.915424953 | 1.373854061 |             |             |             |             |             |
| YKL147C | YKL147C::YKL147C::molecular_function unknown                         |             |             |             |             |             | 1           | 1.01959595  |
|         | 1.315750906                                                          | 1.273981901 | 0.97327165  | 1           | 1.385425879 | 1.505540147 |             |             |
|         | 0.999363625                                                          | 1.433052265 | 1           | 1.502719681 | 1.389934959 | 1.137322136 |             |             |
|         | 1.238296607                                                          | 1           | 1.013101415 |             | 0.688156498 | 0.486767003 | 1           |             |
|         | 0.955771746                                                          | 1.125880694 |             | 0.635235906 | 1           | 0.99510338  | 1.203265098 |             |
|         | 0.928398588                                                          | 1.300852116 | 1.063467383 | 1           | 1.000314709 | 0.496422736 |             |             |
|         | 0.71860789                                                           | 1.018984841 | 0.240891192 | 1           | 0.634498991 | 0.479567338 |             |             |
|         | 0.943720874                                                          | 0.684227353 | 0.539665292 | 0.674230463 |             |             |             |             |
| YKL149C | YKL149C::DBR1::RNA lariat debranching enzyme                         |             |             |             |             |             | 1           | 0.892967994 |
|         | 0.938879165                                                          | 1.029527624 | 1.366214644 | 1           | 0.955019198 |             | 1.117879607 |             |
|         | 1.263740771                                                          | 1           | 0.787274263 | 0.833305808 | 1.116468622 | 1.071119112 | 1           |             |
|         | 0.639387073                                                          | 0.612674427 | 0.861892434 |             | 1           | 0.779122306 | 2.129056741 |             |
|         | 1.799431399                                                          | 0.785928785 | 1           | 1.049153393 | 1.100302051 | 0.973696217 |             |             |
|         | 0.886720348                                                          | 1.114037031 | 1           | 0.875844476 | 0.859913081 | 0.904486434 |             |             |
|         | 0.859793134                                                          | 0.951513141 |             | 1.159001498 | 1.184097066 | 1.01036756  |             |             |
|         | 1.259397287                                                          | 1.062315384 | 2.337040378 |             |             |             |             |             |
| YKL151C | YKL151C::YKL151C::molecular_function unknown                         |             |             |             |             |             | 1           | 0.947284181 |
|         | 1.485634789                                                          | 1.301580078 | 1.517790459 | 1           | 1.14813452  | 1.278573755 |             |             |
|         | 1.648714357                                                          | 2.024594878 | 1           | 1.207826971 | 2.12282356  | 4.317299075 |             |             |
|         | 2.233342454                                                          | 1           | 1.927539598 | 2.594164486 | 3.637993723 | 4.944716085 | 1           |             |
|         | 2.61144869                                                           | 3.598406969 | 6.772955994 | 4.017599633 | 1           | 1.066801682 |             |             |
|         | 1.385565689                                                          | 1.768021943 | 1.034075822 | 1.132354108 | 1           | 1.17849083  |             |             |
|         | 1.648287475                                                          | 2.460432162 | 2.49252377  | 1.201055707 | 1           | 1.113798756 |             |             |
|         | 1.266538902                                                          | 1.395671936 | 1.187337568 | 1.339756865 |             |             |             |             |
| YKL153W | YKL153W::YKL153W::molecular_function unknown                         |             |             |             |             |             | 1           | 1.410011861 |
|         | 1.576759207                                                          | 0.980040978 | 2.128859568 | 1           | 1.016099536 | 1.107344981 |             |             |
|         | 1.600130809                                                          | 1.534229813 | 1           | 1.027857945 | 1.274553326 | 2.2256486   |             |             |
|         | 1.083331739                                                          | 1           | 0.971403867 | 0.932436598 | 1.343791833 | 1.383304392 | 1           |             |
|         | 2.32659952                                                           | 3.629404225 | 6.405163063 | 1.641737999 | 1           | 1.360484251 |             |             |
|         | 1.200454845                                                          | 1.45079709  | 1.315639566 | 1.765154475 | 1           | 1.552334152 |             |             |
|         | 1.87373286                                                           | 1.482216461 | 1.300890183 | 1.420881559 | 1           | 1.433709139 |             |             |
|         | 1.687633925                                                          | 0.747918637 | 1.612314511 | 1.289476245 | 1.760004232 |             |             |             |
| YKL167C | YKL167C::MRP49::16 kDa mitochondrial ribosomal large subunit protein |             |             |             |             |             |             |             |
|         | 1                                                                    | 1.013262468 | 1.560910726 | 1.116678671 | 2.043400206 | 1           | 1.154703181 |             |
|         | 1.13285688                                                           | 1.491128601 | 1.620605791 | 1           | 1.118632977 | 1.180263924 |             |             |
|         | 1.856425576                                                          | 1.09241451  | 1           | 1.208821187 | 0.867718169 | 0.812525116 |             |             |
|         | 1.412438005                                                          | 1           | 1.358842662 | 2.103965525 |             | 1.226724106 | 1           |             |
|         | 1.189490828                                                          | 1.438945834 | 0.678614453 | 0.749475282 | 1.03424688  | 1           |             |             |
|         | 1.160315743                                                          | 1.895288663 | 1.338908505 | 0.991358623 | 1.977150221 | 1           |             |             |
|         | 1.312006891                                                          | 1.59331227  | 1.044830108 | 1.902711984 | 1.86676534  | 1.570869482 |             |             |
| YKL169C | YKL169C::YKL169C::molecular_function unknown                         |             |             |             |             |             | 1           | 0.883187134 |
|         | 1.438737617                                                          | 1.160264053 | 1.894550069 | 1           | 1.017630049 |             | 1           |             |
|         | 0.947666927                                                          | 1.134601452 | 1.705195186 | 1.079356917 | 1           | 1.1443214   |             |             |
|         | 0.92923591                                                           | 0.818115995 | 1.495293278 | 1           | 1.578035113 | 2.548796066 |             |             |
|         | 2.493696865                                                          | 1.203831358 | 1           | 1.149174105 | 1.240932452 | 0.662532471 |             |             |
|         | 0.726128199                                                          | 1.145235641 | 1           | 1.259092854 | 1.570753539 | 1.227382564 |             |             |
|         | 1.023213221                                                          | 1.556100944 | 1           | 1.42322768  | 1.623746488 | 0.841807958 |             |             |
|         | 2.071383784                                                          | 1.841900924 |             |             |             |             |             |             |
| YPL069C | YPL069C::BTS1::Required for membrane attachment of YPT1 and SEC4     |             |             |             |             |             | 1           |             |
|         | 1.014709729                                                          | 1.148227431 | 0.9742354   | 1.423120876 | 1           | 0.968502802 |             |             |
|         | 0.891275584                                                          | 1.244425692 | 1.106653468 | 1           | 0.956100379 | 0.91793162  |             |             |
|         | 1.108281168                                                          | 0.978063424 | 1           | 1.205327358 | 0.321966988 | 0.532931586 |             |             |
|         | 0.653425427                                                          | 1           | 1.005332415 |             | 1.144122378 | 1           | 1.016268017 |             |
|         | 0.983666232                                                          | 0.846219228 | 0.775768116 | 0.952546724 | 1           | 1.011464609 |             |             |

|         |                                                                                                                  |             |             |             |             |             |
|---------|------------------------------------------------------------------------------------------------------------------|-------------|-------------|-------------|-------------|-------------|
|         | 0.996960455                                                                                                      | 0.943782143 | 0.901043235 | 1.009423141 | 1           | 1.060088726 |
|         | 0.983832878                                                                                                      | 0.782950602 | 1.047660891 | 0.906270811 |             |             |
| YPL071C | YPL071C::YPL071C::molecular_function unknown                                                                     |             |             |             | 1           | 0.829085137 |
|         | 1.178844631                                                                                                      | 0.880726517 | 1.53359407  | 1           | 0.778738422 | 0.809965559 |
|         | 1.374878725                                                                                                      | 1.273235585 | 1           | 0.973869531 | 1.217138491 | 1.519387736 |
|         | 1.224932568                                                                                                      | 1           | 1.254076461 | 0.874567114 | 1.010901082 | 1.598874531 |
|         | 1.966596528                                                                                                      | 3.016270988 | 2.944500477 | 1.922365921 |             | 0.981484476 |
|         | 1.262790153                                                                                                      | 0.776940688 | 0.672871176 | 1.323353992 | 1           | 1.137682437 |
|         | 1.882490809                                                                                                      |             | 2.355337414 | 4.198635767 | 1           | 1.270203529 |
|         | 1.280456628                                                                                                      | 1.164267594 | 1.673312106 | 1.830054085 |             |             |
| YPL085W | YPL085W::SEC16::multidomain vesicle coat protein that interacts with Sec23p                                      |             |             |             |             |             |
|         | 1                                                                                                                | 1.769231669 | 1.578587352 | 1.518824109 | 1.677438191 | 1           |
|         | 1.369164116                                                                                                      | 1.596236594 | 1.626303027 | 1.762102183 | 1           | 1.540978909 |
|         | 1.209978198                                                                                                      | 1.470653858 | 1.454770685 |             |             | 0.857497072 |
|         |                                                                                                                  |             | 1           | 0.889793539 | 0.807038026 | 0.738619897 |
|         | 0.74167953                                                                                                       | 1.014172612 | 1           | 1.152671335 | 1.224028744 | 1.122078972 |
|         | 1.20290511                                                                                                       | 2.10002093  | 1           | 0.888938633 | 1.253467761 | 0.820167564 |
|         | 1.100854708                                                                                                      |             |             |             |             |             |
| YPL087W | YPL087W::YDC1::Yeast dihydro-ceramidase                                                                          |             |             |             |             |             |
|         | 1                                                                                                                |             |             | 1           | 1.230923399 |             |
|         | 1.109607132                                                                                                      | 1.186666782 | 1.237533699 | 1           | 1.254224431 | 1.20282401  |
|         | 1.300592582                                                                                                      | 1.101031202 | 1           | 1.231477636 | 1.443076379 | 1.798890857 |
|         | 1.053166157                                                                                                      | 1           | 2.989976287 | 2.737675543 | 2.87592356  | 2.469279031 |
|         | 2.125565486                                                                                                      | 1.701776484 | 2.520608343 | 1.879977358 | 1           | 1.43268185  |
|         | 1.770390603                                                                                                      | 1.878452805 | 1.202181309 | 1.122521939 | 1           | 1.140092823 |
|         | 1.458149016                                                                                                      | 1.664587031 | 1.053443388 | 1.16223046  | 1           | 1.406105584 |
|         | 1.970313339                                                                                                      | 1.141970484 | 1.396595502 | 1.935100627 | 1.921994622 |             |
| YPL089C | YPL089C::RLM1::serum response factor-like protein that may function downstream of MPK1 (SLT2) MAP-kinase pathway |             |             |             |             |             |
|         | 1                                                                                                                |             |             | 1           | 0.916949408 | 0.902802299 |
|         | 1.001379761                                                                                                      | 0.714935591 | 1           | 1.065679117 | 1.106111919 | 0.90905868  |
|         | 0.835799172                                                                                                      | 1           | 0.943025786 | 1.006211032 | 0.888206865 | 1.026329798 |
|         | 0.918972351                                                                                                      |             | 1.246728674 | 0.654984542 | 1           | 0.50997877  |
|         | 0.670614873                                                                                                      | 1           | 0.692542142 | 0.69227494  | 0.795625446 | 0.722581773 |
|         | 0.983724128                                                                                                      | 1           | 0.753111802 | 0.551284578 | 0.560988663 | 0.740776697 |
|         | 0.645624963                                                                                                      | 1           | 0.83486376  | 0.836806886 | 1.004872279 | 0.787149584 |
|         | 0.736151347                                                                                                      |             |             |             |             |             |
| YPL091W | YPL091W::GLR1::converts oxidized glutathione and NADPH into two glutathiones and NADP+                           |             |             |             |             |             |
|         | 1                                                                                                                | 1.045192688 | 0.990243467 | 1.083773352 | 1.040547754 | 1           |
|         | 1.083692428                                                                                                      | 1.04190862  | 1.002262151 | 0.983954999 | 1           | 1.700804439 |
|         | 2.004096208                                                                                                      | 1.789207023 | 1.856117942 | 1           | 2.679638382 | 3.472796443 |
|         | 3.153182704                                                                                                      | 1.25607392  | 1           | 1.580840515 | 1.154666465 | 1.305043107 |
|         | 1.418601387                                                                                                      | 1           | 1.476849007 | 2.191577701 | 3.224148311 | 1.682014344 |
|         | 1.057277709                                                                                                      | 1           | 1.868108363 | 2.70969133  | 3.269950066 | 2.144742424 |
|         | 1.855725269                                                                                                      |             | 1.266947751 | 1.78327875  | 1.38365098  | 0.869400376 |
|         | 0.988200329                                                                                                      | 1.460540817 |             |             |             |             |
| YDR218C | YDR218C::SPR28::Septin-related protein expressed during sporulation                                              |             |             |             |             |             |
|         | 1                                                                                                                | 1.522228459 | 1.446520559 | 1.251778951 | 1           | 1.117111083 |
|         | 1.267479958                                                                                                      |             | 1.254242461 | 1           | 1.089051402 | 1.061741523 |
|         | 1.345452776                                                                                                      | 1           |             | 1.019915567 |             |             |
|         |                                                                                                                  | 1.010600344 | 0.951727064 | 0.900716614 | 0.910942165 |             |
|         | 1.046428817                                                                                                      | 1.057646787 | 1           | 0.527963203 | 0.455557026 | 0.608038085 |
|         | 0.547998169                                                                                                      |             | 0.711882332 |             |             |             |
| YPL093W | YPL093W::NOG1::Nucleolar G-protein 1; LPG15w (working nomenclature)                                              |             |             |             |             |             |
|         | 1                                                                                                                | 1.656557988 | 1.180793394 | 2.294212094 | 1.584472231 | 1           |
|         | 1.338075436                                                                                                      | 1           | 1.03664344  |             |             |             |
|         |                                                                                                                  |             |             | 1           | 0.629802544 | 0.385872322 |
|         | 0.638065779                                                                                                      | 0.973993215 | 0.752340038 | 1           | 0.450291993 | 0.487180608 |

|         |                                                                                                                                                                                             |             |             |             |             |             |             |  |
|---------|---------------------------------------------------------------------------------------------------------------------------------------------------------------------------------------------|-------------|-------------|-------------|-------------|-------------|-------------|--|
|         | 0.324648855                                                                                                                                                                                 | 0.707680823 | 0.615930392 | 1           | 0.419985966 | 0.492866794 |             |  |
|         | 0.811689925                                                                                                                                                                                 | 0.973242425 | 0.383357828 | 0.823086558 |             |             |             |  |
| YPL095C | YPL095C::YPL095C::molecular_function                                                                                                                                                        | unknown     |             | 1           |             | 0.79010434  |             |  |
|         | 0.755126856                                                                                                                                                                                 | 0.828767849 |             | 1           | 1.1203294   | 1.01024282  | 1.091739686 |  |
|         | 0.988652711                                                                                                                                                                                 | 1           | 1.752466797 | 1.661403804 | 0.935691021 | 0.981460027 | 1           |  |
|         | 1.096639112                                                                                                                                                                                 | 1.009463994 | 0.511871459 | 0.590578725 | 1           | 1.406118997 |             |  |
|         | 0.752946871                                                                                                                                                                                 | 0.722323927 | 0.924903966 | 1           | 1.118542397 | 1.173617965 |             |  |
|         | 1.130875568                                                                                                                                                                                 | 1.040244741 | 1.16197122  | 1           | 0.880150496 | 1.138388115 |             |  |
|         | 1.332195122                                                                                                                                                                                 | 1.189435195 | 1.076008131 | 1           |             | 0.994574404 | 1.10176627  |  |
|         | 1.046019249                                                                                                                                                                                 | 1.239224867 | 2.229338707 |             |             |             |             |  |
| YDR220C | YDR220C::YDR220C::molecular_function                                                                                                                                                        | unknown     |             | 1           |             | 1.254388513 |             |  |
|         | 1.561787011                                                                                                                                                                                 | 1.755869905 | 1.798451447 | 1           | 1.642158841 | 1.340801558 |             |  |
|         | 1.732824031                                                                                                                                                                                 | 1           | 1.428115717 | 1.484038752 | 1.304960995 | 1.408987872 |             |  |
|         |                                                                                                                                                                                             | 1           | 0.620053086 |             |             | 1           |             |  |
|         | 1.060774416                                                                                                                                                                                 |             | 1.136046279 |             | 0.571655247 | 0.631636486 |             |  |
|         | 0.872206656                                                                                                                                                                                 | 0.718645599 | 0.928930893 | 1           | 0.997370306 | 0.848176893 |             |  |
|         | 0.653136001                                                                                                                                                                                 |             | 0.584041204 |             |             |             |             |  |
| YPL109C | YPL109C::YPL109C::molecular_function                                                                                                                                                        | unknown     |             | 1           |             | 1.027256088 |             |  |
|         | 1.060107991                                                                                                                                                                                 | 1.341918989 | 1.129973374 | 1           | 1.242530093 | 1.20149787  |             |  |
|         | 1.310191023                                                                                                                                                                                 | 1.098039308 | 1           | 1.307171276 | 1.445630463 | 1.403840349 |             |  |
|         | 1.608708329                                                                                                                                                                                 | 1           |             | 1.9092068   | 1.090289388 | 1           | 1.580045323 |  |
|         | 1.811707455                                                                                                                                                                                 | 1.34408836  |             | 0.970071877 | 1.085152797 | 1.198246625 |             |  |
|         | 0.894899244                                                                                                                                                                                 | 0.961656355 | 1           | 0.999625542 | 0.757284629 | 1.15532718  |             |  |
|         | 1.285560001                                                                                                                                                                                 | 1           | 1.564609622 | 1.057914868 | 1.180004202 | 1.677270287 |             |  |
| YDR234W | YDR234W::LYS4::homoaconitase                                                                                                                                                                |             |             | 1           | 0.978075181 | 0.715837065 |             |  |
|         | 0.66994678                                                                                                                                                                                  | 0.434240988 | 1           | 0.913108826 | 0.756913999 | 0.52155389  | 1           |  |
|         | 0.71076876                                                                                                                                                                                  | 0.355469006 | 0.229418559 | 0.644174227 | 1           | 0.448762364 |             |  |
|         | 0.528936244                                                                                                                                                                                 | 1.133364233 | 0.827206825 | 1           | 0.455753429 | 0.524806585 |             |  |
|         | 1.127964941                                                                                                                                                                                 | 1.188848585 |             | 0.762362328 | 0.455598499 | 0.698135251 |             |  |
|         | 1.826641565                                                                                                                                                                                 | 1.225753049 | 1           | 0.345906857 | 0.093243851 | 0.181267655 |             |  |
|         | 0.342588111                                                                                                                                                                                 | 0.49610828  | 1           | 0.228941695 | 0.136582564 | 0.418780308 |             |  |
|         | 0.603688578                                                                                                                                                                                 | 0.281377277 | 0.613812402 |             |             |             |             |  |
| YPL111W | YPL111W::CAR1::arginase                                                                                                                                                                     |             |             | 1           | 1.092901628 | 0.956186097 | 0.679214208 |  |
|         | 0.809390791                                                                                                                                                                                 | 1           | 1.083989003 | 1.007870857 | 0.803719676 | 0.719734158 | 1           |  |
|         | 1.656842173                                                                                                                                                                                 | 0.994118443 | 0.821974624 | 0.894961312 | 1           | 1.026386469 |             |  |
|         | 0.551298807                                                                                                                                                                                 | 0.548018014 | 0.581534673 | 1           | 1.566064816 | 0.807653471 |             |  |
|         | 1.090557984                                                                                                                                                                                 | 1           | 1.314403358 | 1.059118654 | 1.546434784 | 0.960993726 |             |  |
|         | 0.781446879                                                                                                                                                                                 | 1           | 0.784340208 | 0.684135801 | 1.030005029 | 0.643205638 |             |  |
|         | 0.659361153                                                                                                                                                                                 | 1           | 1.025853846 | 0.664766614 | 1.01127712  | 0.439535885 |             |  |
|         | 0.690009608                                                                                                                                                                                 | 0.964937646 |             |             |             |             |             |  |
| YDR250C | YDR250C::YDR250C::molecular_function                                                                                                                                                        | unknown     |             | 1           |             | 1.175219621 |             |  |
|         | 1.117697966                                                                                                                                                                                 | 1.529514258 | 1.28388697  | 1           | 1.296704408 | 1.402762943 |             |  |
|         | 0.989935227                                                                                                                                                                                 | 0.991078755 | 1           | 1.18031463  | 1.200304314 | 0.989196292 |             |  |
|         | 1.231067345                                                                                                                                                                                 | 1           | 0.975001579 |             | 1.181269247 | 0.305011748 |             |  |
|         |                                                                                                                                                                                             |             | 0.527262596 | 0.693982361 |             | 0.793246884 | 1           |  |
|         | 0.586496845                                                                                                                                                                                 |             |             |             | 0.7101725   | 0.489331682 |             |  |
| YDR252W | YDR252W::BTT1::beta subunit of the nascent-polypeptide-associated complex (NAC); homologous to human BTF3b; Negative effect on expression of several genes transcribed by RNA polymerase II |             |             | 1           | 1.21440006  | 1.1453586   |             |  |
|         | 1.425098021                                                                                                                                                                                 | 1           | 1.166147278 | 1.087325204 | 0.990982722 | 1.169294188 | 1           |  |
|         | 1.020482663                                                                                                                                                                                 | 1.013625044 | 1.006162539 | 1.052474824 | 1           | 1.094872983 |             |  |
|         | 0.721833661                                                                                                                                                                                 | 1.068301592 | 0.860995286 | 1           | 1.198041968 | 1.051363343 |             |  |
|         | 1.100817474                                                                                                                                                                                 | 1.011400057 | 1           | 0.917312467 | 0.859210744 | 0.8065162   |             |  |
|         | 0.978655998                                                                                                                                                                                 | 1.024773135 | 1           | 0.943960225 | 0.787469074 | 0.982067212 |             |  |
|         | 0.895241286                                                                                                                                                                                 | 1.036454767 | 1           | 1.040463723 | 0.947130357 | 1.093465416 |             |  |
|         | 1.74470631                                                                                                                                                                                  | 1.017151883 | 1.033236274 |             |             |             |             |  |

YDR254W YDR254W::CHL4::Protein necessary for stability of ARS-CEN plasmids;  
suggested to be required for kinetochore function 1 1.204861095  
1.402896903 1.148725793 1.556397908 1 1.183336292 1.157780654  
1.351977427 1.323309824 1 1.157338478 1.208338423 2.024866977  
1.160495785 1 0.941050485 0.678331306 1.219315174 1.048178959 1  
1.017522896 2.65484201 1.887262518 0.642537611 1 1.027535023  
0.944530141 0.875303779 0.974485402 0.957342399 1 0.877274052  
0.783826821 0.960707279 0.804326089 0.893035337 1 1.144155269  
0.972721867 0.978258261 1.241070634 1.475920597 2.252980512  
YDR256C YDR256C::CTA1::catalase A 1 0.964788303 0.881857605  
0.897641439 0.796553465 1 0.929442259 0.948826664 0.866461428  
1.011261324 1 0.835800161 0.743872744 0.937141143 0.853058293 1  
0.770187966 0.748442112 0.989939662 0.948408521 1 0.838612962  
2.165360466 1.370107524 0.677863551 1 1.022380494 0.998924434  
1.005649407 1.07668937 1.196864916 1 0.782087466 0.726076122  
0.834687266 0.887337956 1 0.817067778 0.621323005  
0.861107632 0.879898261 1.981537122  
YDR258C YDR258C::HSP78::Similar to E. coli ClpB protein; involved in folding  
of some mitochondrial proteins 1 0.982659645 1.487358423 1.383791703  
1.021406868 1 1.305420091 1.474205284 0.956804303 1  
2.081982297 2.193968054 1.294878624 0.965358905 1 2.983136505  
2.732686129 2.43585999 2.508837249 1.258464493 1.105918616  
0.609405651 0.919715381 1 2.267177782 2.921378489 1.787398465  
1.021594111 1.310521712 1 4.105607574 1.449318843 1.703911111  
0.813896323 0.59553696 1 3.643381722 1.689274623 0.856818259  
0.832241665 1.416701508 0.884380232  
YDR267C YDR267C::YDR267C::molecular\_function unknown 1 1.000417996  
1.074160208 0.918641911 0.971378078 1 0.888090322 0.840582132  
1.463858433 1.247415478 1 0.900769731 0.978459527 0.895354166  
1.046052464 1 0.485173944 0.369532674 0.48587887 0.732266491 1  
1.187588381 1.566356316 1.332248282 0.733819615 1 1.15614794  
1.165508771 1.028287729 1.01892 1.090522922 1 1.029169134  
1.349454569 0.80997843 0.760589972 0.858119142 1 1.090185285  
1.029910101 0.922189458 0.896049048 0.947331693 1.872084122  
YDR268W YDR268W::MSW1::mitochondrial tryptophanyl-tRNA synthetase 1  
0.940062945 1.016093836 0.969530859 1.351073285 1 0.918277195  
0.992168894 1.19818774 1.240107588 1 0.921688599 1.013953997  
1.173112496 1.145284503 1 1.292878287 1.114553135 1.125701696  
1.228849894 1 1.050778328 1.762697259 1.627352042 0.811506298 1  
0.961090296 1.087773385 0.965578942 0.87006441 0.942886693 1  
1.483964046 1.580206325 1.783163921 1.232610639 1.132505487 1  
1.147735974 1.424272977 1.099917459 1.254507972 1.008857787 1.618153195  
YKL171W YKL171W::YKL171W::not yet annotated 1 1.05991197 1.098851568  
1.116148807 1.194267329 1 1.148074184 1.305643098 0.958515421  
0.922128463 1 1.083005174 1.256203858 1.038762073 1.223843236 1  
0.836557295 1.328894884 0.832778357 1 1.557940295 1.691738635  
1.906734779 1 1.101536231 1.408691213 1.058743771 1.045841308  
1.201649913 1 1.037848875 0.5783626 1.130373827 0.772988193 1  
0.917818076 0.696538527 0.693072122 0.654912761 0.745690342  
YKL173W YKL173W::SNU114::involved in splicing 1 0.886705234  
0.876180926 1.124727753 0.839195345 1 1.116171953 1.139837775  
0.772551423 0.758317075 1 0.904309194 0.904657839 0.402719454  
0.926157934 1 0.636407797 0.724899075 0.569023845 1  
0.774421412 0.759727847 0.535379945 0.690259413 1 0.828733533  
1.133274826 1.074363867 1 0.880435937 1.061021573 1.212070337  
0.792904755 0.89197669 0.928731606 1.0531179 0.985012108  
0.894086029 1.027106933



YKL175W YKL175W::ZRT3 1 0.961050574 0.671559016 0.965790723  
 2.418745156 1 0.896363761 0.825795877 0.779437328 1.957292557 1  
 1.048275463 0.831645134 0.630418721 1.418689018 2.330512816  
 1.6719233 1.29861856 0.782545139 1 0.745566299 0.386365695  
 0.263652181 0.605701949 1 1.230181699 1.066868088 1.346363443  
 1.22786779 0.849127516 1 1.270939939 0.855166735 1.014629149  
 0.831295538 0.560246567 1 0.917283021 0.797604098 0.904342827  
 0.739441342 0.572173013 0.728519183  
 YKL177W YKL177W::YKL177W::molecular\_function unknown 0.868057314  
 0.914470824 0.969432564 1.041623026 1.061037035 0.916886123  
 0.71493977 1.033012348 0.923186645 0.974459699  
 0.688022721 0.95384079 1 0.879480371  
 1.027838669 1.04564974 1.040376857 1.016049605 1 0.916177087  
 0.960063207 0.857222559 0.991690728 0.752856805 1 0.626573167  
 0.554102283 0.539181495 0.677193633 0.578055889 0.400160157  
 YKL191W "YKL191W::DPH2::Diphtheria toxin resistance protein, required for  
 diphthamide biosynthesis" 1 0.762173453 0.496102099 0.499850611  
 0.328547278 1 0.665526221 0.59413345 0.378405842 0.45713443 1  
 0.609304987 0.336878751 0.218901437 0.457398725 1.074046305  
 0.733234979 0.741299245 0.796298116 1 0.606599612 0.3710738  
 0.203192073 0.550877376 1 0.944956972 0.484027763 0.500882633  
 1.058300357 1 0.56233846 0.262571797 0.256146343 0.464723229  
 0.475726005 1 0.409789633 0.215307547 0.529826498 0.614843293  
 0.353943081 0.678608579  
 YKL193C YKL193C::SDS22::Interacts with and may be a positive regulator of  
 GLC7 which encodes type1 protein phosphatase 1 0.835409488 1.21361175  
 1.080332006 1.631200797 1 1.127694079 1.196853434 1.00698331  
 1.253564101 1 1.177866482 1.326248361 1.786023267 1.161814254 1  
 2.531601984 1.329588128 2.142636132 1.544788759 1 1.875076979  
 2.660591097 2.295288863 1.646983037 1 1.184279751 1.898133467  
 1.449833874 1.055489363 1.343881408 1 1.179890622 1.454034528  
 1.553874702 1.201959719 1.156630113 1 1.361200091 1.304654287  
 1.349463345 1.158262836 1.46749791 0.819584055  
 YKL195W YKL195W::YKL195W::molecular\_function unknown 1 0.68100903  
 1.125265573 1.188223729 1.155915591 1 1.008219242 1.189973882  
 1.20354197 1.071566727 1 0.886595327 1.298195651 1.441508933  
 0.977478415 1 1.602114375 1.771232432 1.58424225 1.515214446 1  
 1.830015796 2.141939883 2.11259322 1.554252728 1 1.058001355  
 1.798489949 1.773597011 0.920495756 1 2.026291163 1.965627396  
 1.830757969 0.890924328 1.119272775 1 1.378424777 1.208627757  
 0.787305776 0.923715372 0.973368646 1.129554927  
 YKL197C YKL197C::PEX1::member of the AAA-protein family 1 1.170633332  
 1.366326058 1.206141108 1.561118765 1 1.229380974 1.163664205  
 1.447482745 1.312667365 1 1.176100813 1.388357822 1.667306839  
 1.457433116 1 1.30924383 1.028188391 1.157369646 1.486259777 1  
 1.452007726 1.789932731 1.827215674 1.285516532 1 1.103381366  
 1.144798463 0.822277523 0.843014907 1.119549775 1 1.12086003  
 1.391017793 1.433303525 0.967696782 1.256651249 1 1.2155863  
 1.628867026 1.112583172 1.862419183 1.282963794 1.666312469  
 YKL199C YKL199C::YKT9::Protein of unknown function 1 1.038679178  
 1.002536774 1.049680078 0.85720317 1 1.070406015 1.285802018  
 0.834228225 0.803466878 1 1.156808984 1.092645111 0.820556759  
 0.917198445 1 0.941139367 0.570498247 0.780250806 0.831611336 1  
 0.934524686 1.106302315 0.770649923 0.561377672 1 1.109920156  
 1.102084766 0.969151462 1.340291552 1.108658441 1 0.931636782  
 0.785563256 0.82226955 0.98657365 0.741861555 1 0.719144071  
 0.659318575 0.943224115 0.918660442 0.920314582 1.661058689

YKL201C YKL201C::MNN4::Required for the transfer of mannosylphosphate to  
 cell wall mannans. 1 0.801147116 0.943424554 0.968754725 1.148919185 1  
 0.938219711 0.94689218 0.81408725 1.023231719 1 0.750121597  
 0.965687852 1.057816589 0.974911664 1 1.044721984 0.745200813  
 1.072193737 1.11211435 1 1.163259854 1.436373788 1.361308282  
 0.945172463 1 0.99741111 1.062324162 0.960198543 0.828016668  
 1.086400451 1 0.759113573 1.249600388 1.075759412 0.93993076  
 1.011326365 1 0.875621812 1.214939444 1.041465642 0.915278672  
 1.211076604  
 YPL113C YPL113C::YPL113C::molecular\_function unknown 1 0.760257686  
 0.687016651 0.73909786 1 0.936385533 0.780976064 0.975906609  
 0.763279466 1 0.740143673 0.69282706 0.700820814 0.653056569 1  
 0.622672982 0.41593595 0.636289053 0.949610228 0.314325102  
 0.554886241 0.53378279 1 1.131559815 1.146153505 1.369041727  
 1.107799264 0.869676686 1 1.18902293 1.337228385 1.246498188  
 1.136647257 1.017748708 1 1.039081916 1.175149302 0.786546334  
 0.785720679 0.911500081 0.999962573  
 YPL115C YPL115C::BEM3::Gtpase-activating protein activity toward the  
 essential bud-site assembly GTPase Cdc42 1.036743663 0.962301243  
 1.416690937 1.238395771 1.277317976 1.476225388 0.995059963  
 0.95900611 1.245417847 0.987907694 0.495471978 1.173807812 1  
 0.545073228 0.496208573 0.507172972 0.573599021 1 0.937995902  
 0.655547739 0.984242325 1 0.996236345 0.962829219 1.070289301  
 1.05793719 0.844578092 1 1.089545858 0.81850621 0.894923858  
 0.749953699 0.524781239 1 1.109823173 0.920521194 1.056363913  
 0.783884344 1.043741576 0.747782872  
 YPL117C YPL117C::IDI1::catalyzes activation step in isoprenoid biosynthetic  
 pathway 1 0.78418534 0.951419904 0.800568006 0.986450607 1  
 0.767101536 0.744788873 1.163714515 0.914678294 1 0.630766203  
 0.718957729 0.716318425 0.90016466 1 0.592041128 0.297396304  
 0.256420458 0.67193822 1 0.965654825 0.496662462 0.672343411  
 1.188486379 1 0.696272038 0.559067391 0.486765747 0.643346426  
 0.835704333 1 0.80675251 0.691026565 0.561352912 0.751063316  
 1.524969059 1 0.719493815 0.559923026 0.844846778 1.149511816  
 0.964495438 0.876499665  
 YPL119C YPL119C::DBP1::putative ATP-dependent RNA helicase; Dead box protein  
 1 1.6250406 1.389013855 1.566851471 1.182847876 1  
 1.309853378 1.381147513 1.381905157 1 1.282599137 1.497296862  
 1.498818094 1.492238503 1 0.993168243 0.927520741 0.880550043 1  
 1.072168523 1.554452342 0.962056916 0.86535773 1 0.961365268  
 0.799353203 0.934124383 0.755775465 0.950406875 1 1.237044488  
 1.082900562 1.106817361 1.094439585 1 0.897782148 1.067792894  
 0.836380674 0.959809484 0.896854949 1.165455518  
 YPL133C YPL133C::RDS2::Regulator of drug sensitivity 1 0.812828345  
 0.815716747 1.061292544 1.007557791 1 1.025817304 0.996858441  
 1.129507187 0.941593881 1 0.908695996 0.876382361 0.57340447  
 1.163295028 0.986558907 0.785411401 1.041101383 1  
 0.899642628 1.309484966 1.156348728 1.289794106 1 1.03003835  
 1.112377398 0.985232081 0.982689184 1.25671479 1 0.941953959  
 0.857116881 1.345419779 1 0.594997447 1.067413237  
 0.593450492 1.290100158 0.938668951  
 YPL135W YPL135W::ISU1::Iron-sulfur cluster nifU-like protein 1  
 2.243200683 1.785575435 1.266962217 1.351621652 1 1.500598734  
 1.476399076 1.326800467 1.344941755 1 3.02300462 1.735629349  
 1.611535872 1.236681396 1 1.896697856 1.014728793 1.262680236  
 1.245983857 1 1.867982939 1.027753982 1.223010559 1.262757487 1  
 1.369626277 1.425063983 1.858980265 1.213393367 1.038916849 1

1.215836532 1.75156423 1.337277789 1.192870907 0.875216803 1  
1.05975741 1.3930438 1.236051414 0.839821128 0.777277374 1.413257103  
YPL137C YPL137C::YPL137C::molecular\_function unknown 1 1.169087259  
0.960852096 1.604837518 0.929515364 1 1.30012216 1.462862904  
0.983956211 0.980602779 1 1.218988513 1.044850161 0.727919977  
1.294749256 1 0.738397504 0.708578552 1 1.405281839  
0.756973513 1 1.069547691 0.919819937 1.064293722 1.146911955  
1.045064179 1 0.871788513 0.769964846 0.90350906 0.91867583 1  
0.905781864 0.932693732 1.121794899 1.110338392 1.221150731 0.675981741  
YPL139C YPL139C::UME1::Negative regulator of meiosis. Unscheduled Meiotic  
gene Expression. 1 0.992404238 0.762741348 0.869480851 0.592473505 1  
0.849559612 0.85567085 0.638307695 0.750739465 1 0.888753448  
0.771460276 0.687319626 0.617490873 1 1.165747056 1.141590404  
0.872202204 1 0.971808294 1.237710582 0.71851036 0.676319939 1  
0.953477374 1.062479947 0.979140305 1.097929611 0.952917955 1  
0.83713049 0.756799332 0.815768714 0.756969685 0.746623533 1  
1.204583548 0.853942214 0.850032109 1.314215378 0.782807851  
YPL141C YPL141C::YPL141C::molecular\_function unknown 1 0.663644363  
0.697070272 0.834901904 0.658769335 1 0.759887753 0.835069012  
0.688423941 0.566801454 1 0.801934674 0.709023055 0.373517794  
0.630911231 1 0.817851487 0.526129514 0.822736459 0.882234745 1  
0.960013656 1.571313714 1.011754127 0.644411074 1 0.945047731  
0.957751549 0.909511657 1.021825095 0.805866272 1 0.91353876  
0.638991987 0.796511481 0.974676366 1.193802435 1 0.962844456  
0.908987218 1.084555282 0.836108726 1.189067175 0.690867314  
YPL143W YPL143W::RPL33A::Homology to rat L35a 1 1.122319997  
1.519206462 0.817476745 1.895043113 1 0.939767685 1.008998556  
1.608722516 1.310250378 1 1.008788345 0.818489797 0.986095655  
0.948121829 1 0.947992903 0.353797373 0.290325898 0.573224662 1  
1.25371161 0.877706062 0.576016659 0.805825655 1 0.837422968  
0.738428314 0.609902308 0.783750579 0.897158238 1 1.082143616  
1.696260145 1.026568729 0.899504416 1.986047657 1 1.135025629  
1.682972895 1.106640056 1.784396332 1.115459596 1.584003829  
YKL215C YKL215C::YKL215C::molecular\_function unknown 1 0.919544558  
1.021791092 1.292253232 0.960294195 1 1.235086147 1.247304764  
1.054080138 0.996200087 1 0.992339248 1.194403481 0.992777634  
1.104464651 1 1.209806554 0.759375517 0.931905244 1.21543197 1  
1.264265772 1.934514756 1.390296811 1.144573146 0.934692766  
0.758410425 0.63145375 1  
1.432844078  
YKL215C YKL215C::YKL215C::molecular\_function unknown  
1 1.13741572  
1.280187796 1.287698195 1.358424348 1 1.023863007 0.643484816  
1.024589862 1.183460806 0.450632511 1 0.726177785 0.703066977  
0.847475715 0.70074631 0.691222609 0.610309951  
YKL217W "YKL217W::JEN1::Repressed by glucose, induced by lactic acid; in  
high copy, weakly suppresses cpr3 null mutant phenotype on lactate medium at 37  
degrees" 1 0.99689556 0.980476134 1.128930254 1 1.222459519  
1.121679818 0.993649526 1.103088178 1 1.212263034 1.128897636  
1.151738103 1.079734665 1 1.063021943 0.512761918 1.648958054  
1.035805826 1 1.253280042 2.763502184 1.81361775 0.66205958 1  
0.899150111 0.977687106 0.863858494 0.901852765 1.042574122 1  
0.659724128 0.934612454 0.997726535 0.910508911 0.817611678 1  
0.851280588 1.127610427 0.936971942 1.121501558 0.99532143  
YKL219W "YKL219W::COS9::Protein with similarity to subtelomerically-encoded  
proteins such as Cos5p, Ybr302p, Cos3p, Cos1p, Cos4p, Cos8p, Cos6p, Cos9p" 1

|             |                                                                                       |             |             |             |                                                |
|-------------|---------------------------------------------------------------------------------------|-------------|-------------|-------------|------------------------------------------------|
| 1.129294683 | 0.996058085                                                                           | 1.050380274 | 1.07007283  | 1           | 1.171284673                                    |
| 1.117798555 | 0.898934865                                                                           | 1.064544833 | 1           | 1.097608427 | 1.032458563                                    |
| 1.093227071 | 0.931956894                                                                           | 1           | 1.356830869 | 0.808796071 | 1.626438343                                    |
| 1.399640603 | 1                                                                                     | 0.932026923 | 1.951531038 | 1.857797654 | 0.893379948 1                                  |
| 1.175763076 | 1.130837523                                                                           | 1.450684365 | 1.510410967 | 1.559560468 | 1                                              |
| 0.833396322 | 0.63940859                                                                            | 0.911630591 | 0.566405914 | 0.311706489 | 1                                              |
| 1.100789673 | 0.68595749                                                                            | 0.858402104 | 0.816770307 | 0.6354346   | 1.700461836                                    |
| YKL221W     | YKL221W::MCH2::monocarboxylate permease homologue                                     |             |             |             | 1                                              |
| 1.027325762 | 1.130192826                                                                           | 1.190743712 | 1           | 0.962685615 | 1.302853904                                    |
| 1.289748367 | 1.362178174                                                                           | 1           | 0.968664137 | 1.038391867 | 1.43888063                                     |
| 1.233375772 | 1                                                                                     | 1.261276913 | 1.248570997 | 1.753494436 | 1.921234569 1                                  |
| 1.11220777  | 1.64547572                                                                            | 0.868852881 | 0.820099543 | 1           | 0.871747451                                    |
| 0.939040033 | 1.097244716                                                                           | 1.106330351 | 1.117548912 | 1           | 0.921694443                                    |
| 1.013201205 | 1.024477444                                                                           | 1.293658803 | 1.199639775 | 1           | 0.908482691                                    |
| 1.327676815 | 1.438470469                                                                           | 1.594950869 | 1.289323886 | 0.959683866 |                                                |
| YKL223W     | YKL223W::YKL223W::molecular_function unknown                                          |             |             |             | 0.967791598                                    |
| 0.933830752 | 0.983968475                                                                           | 0.847787151 | 1.020643698 | 1.198334719 |                                                |
| 1.030834436 | 1.217962534                                                                           | 1.305699389 | 0.898627247 | 1.141501182 |                                                |
| 0.608688249 | 0.73269198                                                                            | 0.590003258 | 1           | 0.772579682 |                                                |
| 1           | 1.08784561                                                                            | 0.975261164 | 1.169000156 | 1.266262441 | 1.057849087 1                                  |
| 1.037255804 | 0.861653724                                                                           | 0.901980147 | 0.780988972 | 0.858980137 | 1                                              |
| 0.849391318 | 0.749950548                                                                           | 0.884739114 | 1.019237888 | 0.613350514 | 0.704001714                                    |
| YKL225W     | YKL225W::YKL225W::molecular_function unknown                                          |             |             |             | 1 1.687931145                                  |
| 1.480243953 | 1.186963299                                                                           | 1           | 1.534280624 | 1           |                                                |
| 1.542101525 | 1.49539972                                                                            | 1.759375858 | 1.147856076 | 1           |                                                |
|             |                                                                                       |             | 1           | 1.112277924 | 1.07546104 1.007319414                         |
| 1.331088934 | 1.121862151                                                                           | 1           | 0.999767162 | 0.858482373 | 0.949081246                                    |
| 0.838573308 | 1                                                                                     | 0.785279866 | 0.944225779 | 0.851790091 | 1.252437571                                    |
| 0.838045934 | 0.576160585                                                                           |             |             |             |                                                |
| YKR014C     | YKR014C::YPT52::rab5-like GTPase involved in vacuolar protein sorting and endocytosis |             |             |             | 0.87790763 1.141095607 0.932533754 1.420483995 |
| 0.932260537 | 0.969871324                                                                           | 1.232231409 | 1.320801697 | 0.747491846 |                                                |
| 1.202624192 | 1.250365681                                                                           | 1.129753349 | 1           | 1.629019991 | 1.067079802                                    |
| 1.307696753 | 1.541210094                                                                           | 1           | 1.737631823 | 1.815457952 | 1.976301266                                    |
| 1.25257402  | 1                                                                                     | 1.224522458 | 1.778121409 | 1.32071112  | 1.28283688                                     |
| 1.332471766 | 1                                                                                     | 1.268617714 | 1.31217845  | 1.018661778 | 0.839425523                                    |
| 1.177825494 | 1                                                                                     | 1.089365626 | 1.441612627 | 0.982843477 | 1.515107327                                    |
| 1.112967246 | 1.101535006                                                                           |             |             |             |                                                |
| YKR016W     | YKR016W::YKR016W::molecular_function unknown                                          |             |             |             | 1 0.713097789                                  |
| 1.044445955 | 1.092409344                                                                           | 1.086545572 | 1           | 0.903662667 | 1.22971483                                     |
| 0.910802626 | 0.892067343                                                                           | 1           | 0.856351768 | 0.995201678 | 0.815624629                                    |
| 0.97368877  | 1                                                                                     | 2.047228523 | 0.899320942 | 1.645447056 | 1.416898032 1                                  |
| 1.642879827 | 1.579858318                                                                           | 1.426080374 | 1           | 1.105757041 | 1.152905228                                    |
| 1.094269411 | 1.063807992                                                                           | 1.200842194 | 1           | 0.879494957 | 0.816627948                                    |
| 0.995761656 | 0.836175976                                                                           | 0.614622921 | 1           | 0.781315965 | 0.714684253                                    |
| 0.867773006 | 0.782192539                                                                           | 0.960064454 | 2.393080427 |             |                                                |
| YKR018C     | YKR018C::YKR018C::molecular_function unknown                                          |             |             |             | 1 0.724836972                                  |
| 0.852368382 | 1.060866278                                                                           | 0.734971931 | 1           | 0.913595734 | 1.174793313                                    |
| 0.742512236 | 1.049567864                                                                           | 1           | 0.919889471 | 1.016471206 | 0.902641794 1                                  |
| 1.507990807 | 1.156483516                                                                           | 1.757089193 | 0.766735699 | 1           | 1.170005681                                    |
| 0.867259076 | 0.863536585                                                                           | 0.862118923 | 1           | 0.930622072 | 1.031229187                                    |
| 1.502781662 | 1.409561399                                                                           | 1.290961773 | 1           | 0.983148102 | 0.967249098                                    |
| 1.550886506 | 1.632362149                                                                           | 0.739713023 | 1           | 0.624116279 | 0.739334201                                    |
| 0.928545537 | 0.661915043                                                                           | 0.702576082 | 1.292420981 |             |                                                |
| YKR020W     | YKR020W::VPS67::whiskey (whi) mutant                                                  |             |             |             | 1 0.841180217                                  |
| 1.108269768 | 0.959983624                                                                           | 1.385860088 | 1           | 0.854891071 | 0.866214293                                    |
| 1.297031921 | 1.227093509                                                                           | 1           | 1.011601184 | 1.022069766 | 1.330105126                                    |

|             |                                                                                                                                                   |             |             |             |             |             |
|-------------|---------------------------------------------------------------------------------------------------------------------------------------------------|-------------|-------------|-------------|-------------|-------------|
| 1.22878366  | 1                                                                                                                                                 | 1.01985827  | 0.632098974 | 1.251540247 | 1           |             |
| 2.611757723 | 3.147883967                                                                                                                                       | 1.504684132 | 1.052242632 | 1.306049046 |             |             |
| 0.952737437 | 0.798913321                                                                                                                                       | 0.985578133 | 1           | 1.45521771  | 2.376832362 |             |
| 1.745511799 | 1.448163341                                                                                                                                       | 2.283810887 | 1           | 1.254434194 | 1.24051287  |             |
| 1.145943977 | 1.525870376                                                                                                                                       | 1.234554148 | 1.25827172  |             |             |             |
| YPL157W     | YPL157W::YPL157W::molecular_function                                                                                                              | unknown     | 1           | 0.86134087  |             |             |
| 0.859881183 | 0.950284079                                                                                                                                       | 0.902240335 | 1           | 0.797320326 | 0.839669327 |             |
| 1.105696007 | 1.189538681                                                                                                                                       | 1           | 0.629198724 | 0.658610806 | 0.609854613 |             |
| 0.893060547 | 1                                                                                                                                                 | 0.581252026 | 0.463650041 | 0.916431394 | 1           |             |
| 1.157859594 | 1.239995064                                                                                                                                       | 0.587649286 | 0.871741798 | 1           | 0.890707834 |             |
| 0.943472489 | 0.955838168                                                                                                                                       | 0.95140969  | 1.040965956 | 1           | 0.789068716 |             |
| 0.847465329 | 0.774916366                                                                                                                                       | 0.936378835 | 1.406306363 | 1           | 0.779167641 |             |
| 0.749121493 | 0.882470666                                                                                                                                       | 0.844808658 | 0.879377163 | 1.044619396 |             |             |
| YPL159C     | YPL159C::YPL159C::molecular_function                                                                                                              | unknown     | 1           | 1.306840292 |             |             |
| 1.229902514 | 1.29726455                                                                                                                                        | 2.188854308 | 1           | 1.295424754 | 1.291640248 |             |
| 1.2848221   | 1.632725857                                                                                                                                       | 1           | 0.998131191 | 1.074139606 | 1.369151717 |             |
| 1.541063418 | 1                                                                                                                                                 | 1.049658807 | 0.908287901 | 0.819047412 | 1.220740256 | 1           |
| 1.246647734 | 1.108183315                                                                                                                                       | 1.189720454 | 2.143293177 | 1.107023203 |             |             |
| 1.199282478 | 0.947685812                                                                                                                                       | 1.375981901 | 1           | 0.690754598 | 0.734031444 |             |
| 1.17492697  | 1.418008976                                                                                                                                       | 1           | 1.042821319 | 1.109900409 |             |             |
| 1.572012928 | 0.973693878                                                                                                                                       |             |             |             |             |             |
| YPL161C     | YPL161C::BEM4::Involved in polarity establishment and bud emergence; interacts with the Rho1p small GTP-binding protein                           |             |             | 1.026893347 |             |             |
| 0.961605576 | 0.849745064                                                                                                                                       |             | 0.956635564 | 0.821474223 |             |             |
| 0.88855077  |                                                                                                                                                   |             |             |             |             |             |
|             | 1                                                                                                                                                 | 0.955186941 | 0.988476796 | 0.873652988 | 1.026844424 |             |
| 0.993485452 | 1                                                                                                                                                 | 0.985411886 |             | 0.794786767 | 1           |             |
| 1.069114271 | 0.878262522                                                                                                                                       | 0.950402578 | 0.744775301 | 2.90094228  |             |             |
| YPL163C     | YPL163C::SVS1::involved in vanadate resistance                                                                                                    |             |             | 1           | 0.800803721 |             |
| 0.720160992 | 0.626565969                                                                                                                                       | 0.647716914 | 1           | 0.748378836 | 0.738259645 |             |
| 0.554614529 | 0.670136685                                                                                                                                       | 1           | 0.660214924 | 0.519706878 | 0.590827713 |             |
| 0.767435321 | 1                                                                                                                                                 | 0.682769757 | 0.234081156 | 0.527261306 | 1           |             |
| 0.314698813 | 0.267819274                                                                                                                                       | 0.152174161 | 0.889258568 | 1           | 0.920428836 |             |
| 0.79805409  | 0.917940715                                                                                                                                       | 0.825389223 | 0.982909374 | 1           | 0.814887138 |             |
| 0.948853403 | 0.738818209                                                                                                                                       | 0.804590742 | 0.709236829 | 1           | 0.952304294 |             |
| 0.636561576 | 1.447939445                                                                                                                                       | 0.786309284 | 1.193921582 | 0.829215951 |             |             |
| YPL165C     | YPL165C::SET6                                                                                                                                     | 1           | 1.256147718 | 1.341505227 | 1.454040654 |             |
| 1.298355799 | 1                                                                                                                                                 | 1.233526737 | 1.553842109 | 0.997751267 | 1           |             |
| 1.379211688 | 1.558181612                                                                                                                                       | 1.422644628 | 1.079987718 | 0.864635183 |             |             |
|             | 1                                                                                                                                                 | 0.735260272 |             | 1           | 1.298567246 | 1.273341201 |
| 1.255419489 | 1.061167612                                                                                                                                       | 1.239691919 | 1           | 1.040709127 | 1.27382627  |             |
| 1.164101174 | 0.923258408                                                                                                                                       | 1.166731757 | 1           | 1.336450257 | 1.350634266 |             |
| 1.102640873 | 1.343526637                                                                                                                                       | 1.349550306 | 1.119923134 |             |             |             |
| YPL167C     | "YPL167C::REV3::DNA polymerase zeta, which is unique in its ability to bypass thymine dimers during replication, is composed of Rev3p and Rev7p." |             |             |             | 1           |             |
| 1.410676672 | 1.517719393                                                                                                                                       | 1.539567454 | 1.437317402 | 1           | 1.429912761 |             |
| 1.352032779 | 1                                                                                                                                                 | 0.93742662  | 1.401846874 | 1.135757972 | 1.51808038  | 1           |
|             |                                                                                                                                                   |             |             | 1           | 0.958806017 |             |
| 1.051222754 | 1.221611681                                                                                                                                       | 1.160601985 | 1.018267688 | 1           | 0.892912127 |             |
| 1.157823975 | 1.238671631                                                                                                                                       | 0.936957953 | 1           | 0.865221665 | 0.952697469 |             |
| 1.048707799 | 0.96977527                                                                                                                                        | 0.966453994 | 1.888721025 |             |             |             |
| YPL181W     | YPL181W::RXT1::Hypothetical ORF                                                                                                                   |             |             | 1           | 0.741307062 | 0.83760601  |
| 0.948480068 | 0.988404258                                                                                                                                       | 1           | 0.994449996 | 1.060109947 | 0.974529039 |             |
| 1.26122153  | 1                                                                                                                                                 | 0.72960275  | 0.926763118 | 1.055318006 | 1.287179806 | 1           |
| 0.71375114  | 1.007732405                                                                                                                                       | 1.226345791 | 1           |             | 1.800491258 | 1           |
| 0.960297708 | 1.114640799                                                                                                                                       |             | 0.755775443 | 1.110838415 | 1           | 1.12381376  |

1.195082329 1.177991973 1.471147478 1 1.249920856 1.133388363  
1.271918879 1.241931462 1.01484825  
YPL183C YPL183C::YPL183C::molecular\_function unknown 1 0.945491872  
0.771820929 1.0557149 0.828174374 1 0.849793086 0.894713597  
1.003573239 0.908550216 1 0.604578869 0.543175664 0.400694127  
0.903051613 1 0.39305909 0.414334829 0.552998143 1  
0.738339193 0.649042792 0.686058395 1 0.730334254 0.649588611  
0.782658723 1.061301737 0.858443823 1 0.647621191 0.512709947  
0.480345322 0.650260358 0.589753775 1 0.743607066 0.760670894  
1.066928177 0.96761401 0.707036439 0.774927232  
YPL185W YPL185W::YPL185W::molecular\_function unknown 1 1.494695509  
1.665019838 1.784190162 1.707856821 1 1.402721998 2.041966858  
2.005482312 1.958155138 1 1.247241017 1.873500371 3.263126611  
2.008734926 1 1.693623907 3.189361874 2.957655578 1  
2.843412742 3.365820006 6.79616135 2.291680169 1 0.875262987  
1.025558162 0.854877871 1 1.037814624  
1.320083794 0.660176322 1.307306659  
YPL187W YPL187W::MF(ALPHA)1::mating\_factor\_alpha 1 1.27926853  
1.361429627 1.117295982 1.466158573 1 1.066962859 1.079034167  
1.60950416 1.43200087 1 1.087146896 1.047999235 1.090301411  
1.070176218 1 0.608413309 1.981381022 1 2.05018316  
1 1.000109955 1.098170427 1.433130239 1.252052629  
1.184994101 1 1.899532707 3.238906303  
0.761304939 1.052903933 1.063007524  
YKR022C YKR022C::YKR022C::molecular\_function unknown 1 0.665655246  
0.830367668 0.736918349 1.079002843 1 0.700387796 0.649556638  
0.933014309 0.890456741 1 0.657613876 0.801059692 0.828520881  
0.935470377 1 1.096170762 0.887363931 0.873962487 1.507882297 1  
1.485887093 1.670646788 2.342307242 1.570423458 1 1.021557352  
1.138898336 0.945809926 0.757938995 1.357601983 1 1.133294148  
1.502915945 1.206326173 1.361363184 1 1.283026442 1.413900934  
1.178780343 1.885973025 1.769009459  
YKR024C YKR024C::DBP7::Dead-box\_protein 1 0.81660527 0.665701253  
1.031345218 0.752206829 1 0.756857125 0.784846199 1.178240571  
0.923300958 1 0.366354234 0.359941307 0.327999586 1.282344355 1  
0.213975863 0.192435083 0.262310488  
0.831701373 0.707085833 0.949972692 0.939274026 1 0.828700167  
0.874927255 0.855789569 1.453851661 0.972973543 1 0.654630823  
0.659716072 0.941920609 1.047937377 0.575647368 1.25827172  
YKR038C YKR038C::KAE1::Kinase-Associated\_Endopeptidase 1 1  
0.758184526 0.808281556 0.678120793 1 0.830755138 0.841490946  
0.894015991 0.755146915 1 0.766271474 0.673986149 0.61590854  
0.881814666 1 0.859268941 0.707084266 0.651045017 1.114140426 1  
1.216190364 0.948817174 0.975508761 1.122630713 1 0.951240772  
0.855915627 1.0936448 1.028521227 0.956686481 1 0.933088477  
0.67651771 0.795825945 0.809557478 0.684450815 1 0.834581077  
0.651010577 0.822282902 0.818154891 0.638547278 0.749534149  
YHR075C YHR075C::PPE1::carboxyl\_methyl\_esterase 1 1.158247211  
1.435853179 1.078334145 1.485816461 1 1.126146871 1.162017593  
1.604237314 1.315707117 1 1.12776047 1.510575821 2.498708179  
1.333650809 1 1.582459608 1.395797091 1.477658085 2.316755001 1  
1.456386087 2.242169503 2.330138994 1.153472314 1 0.95071352  
0.84407009 0.999905749 1.188882967 0.978768367 1 1.544917881  
1.092069503 1.052333531 0.777856894 1 0.778948771 0.715228623  
0.847418058 0.777909189 0.838539421  
YKR040C YKR040C::YKR040C::molecular\_function unknown 1 1.413071118  
1.432815483 1.145275827 1.562585512 1 1.062724202 1.060099428

|             |                                                                             |             |             |             |             |   |
|-------------|-----------------------------------------------------------------------------|-------------|-------------|-------------|-------------|---|
| 1.402844659 | 1                                                                           | 1.163611379 | 1.156784108 | 1.618919484 | 1.143654778 | 1 |
| 1.138039252 | 1.073266411                                                                 | 1.366170303 | 0.954016438 | 1           | 1.093568294 |   |
| 2.574526332 | 1.523005918                                                                 | 0.758396259 | 1           | 0.70552243  | 0.649085281 |   |
| 0.689630326 | 0.718246426                                                                 | 1           | 1.142138329 | 1.407183481 | 1.015606435 |   |
| 1.212891526 | 1.130425302                                                                 | 1           | 0.672569129 | 0.970591863 | 0.909329667 |   |
| 1.506299488 | 0.942525755                                                                 | 1.006967579 |             |             |             |   |
| YHR077C     | YHR077C::NMD2::Protein involved in decay of mRNA containing nonsense codons |             |             |             |             |   |
| codons      | 1                                                                           | 0.653892051 | 0.752094063 | 0.836472292 | 0.774566218 | 1 |
| 0.776092993 | 0.805111227                                                                 | 0.783630764 | 0.755945368 | 1           | 0.742502461 |   |
| 0.747940253 | 0.616384394                                                                 | 0.866743972 | 1           | 0.806050696 | 0.890283948 |   |
| 0.787544427 | 0.800545753                                                                 | 1           | 0.718133349 | 1.218359705 | 0.878363207 |   |
| 0.617995269 | 1                                                                           | 0.822565857 | 0.584968496 | 0.5712821   | 0.888130048 |   |
| 0.823127908 | 1                                                                           | 0.901372291 | 0.693546165 | 0.319281051 | 0.694615415 |   |
| 0.991488319 | 1                                                                           | 0.910356167 | 0.672044278 | 0.814379606 | 1.172915964 |   |
| 0.444995767 | 0.727643518                                                                 |             |             |             |             |   |
| YKR042W     | "YKR042W::UTH1::Youth, involved in determining yeast longevity" 1           |             |             |             |             |   |
| 1.144916737 | 0.834840482                                                                 | 0.884612004 | 0.737396593 | 1           | 1.014489256 |   |
| 1.122316408 | 0.622964336                                                                 | 0.8203683   | 1           | 1.188150014 | 0.825714942 |   |
| 0.665339386 | 0.63240549                                                                  | 1           | 0.849267413 | 0.668428489 | 1.022217941 |   |
| 0.3761459   | 1                                                                           | 0.253150901 | 0.142182111 | 1           | 0.916902109 |   |
| 0.676813476 | 1.094761213                                                                 | 1.264470439 | 0.437880259 | 1           | 0.570539194 |   |
| 0.589317039 | 0.594644143                                                                 | 0.870569291 | 0.507863781 | 1           | 0.650928874 |   |
| 0.644753825 | 0.899409268                                                                 | 0.663448701 | 0.619706639 | 0.507861905 |             |   |
| YKR044W     | YKR044W::UIP5::Ulp1 Interacting Protein 5 1 0.855823072                     |             |             |             |             |   |
| 0.803796256 | 0.810674742                                                                 | 0.691724098 | 1           | 0.821076134 | 0.738981622 |   |
| 0.856835692 | 0.890701932                                                                 | 1           | 0.777803996 | 0.595455867 | 0.605805424 |   |
| 0.972944862 | 1                                                                           | 0.783718863 | 0.543875281 | 0.737894926 | 0.784754613 | 1 |
| 1.04905992  | 0.720418997                                                                 | 0.714936941 | 0.591710744 | 1           | 0.958134004 |   |
| 0.931317692 | 1.192163387                                                                 | 1.34169166  | 1.0305574   | 1           | 0.837174662 |   |
| 0.800074489 | 0.779908952                                                                 | 0.952590571 | 0.664887416 | 1           | 0.611200347 |   |
| 0.681409402 | 0.738775872                                                                 | 0.828186287 | 0.493254552 | 0.84847964  |             |   |
| YHR080C     | YHR080C::YHR080C::molecular_function unknown 1 0.991384141                  |             |             |             |             |   |
| 1.073363628 | 1.130675933                                                                 | 1.043729046 | 1           | 1.208943708 | 1.10140567  |   |
| 1.178824372 | 1.029036219                                                                 | 1           | 1.169459342 | 1.166803393 | 1.211295055 |   |
| 1.162711032 | 1                                                                           | 1.483486291 | 1.465112093 | 1.150407901 | 1           |   |
| 1.02277257  | 1.042860892                                                                 | 0.748224578 | 0.571927058 | 1           | 1.251504486 |   |
| 1.023582867 | 1.987543909                                                                 | 1.689325726 | 1.554877568 | 1           | 1.052586597 |   |
| 1.125691386 | 0.809238645                                                                 | 0.672953523 | 0.469363145 | 1           | 1.718856818 |   |
| 1.047180447 | 1.603480901                                                                 | 1.008164396 | 1.287088343 | 1.315187225 |             |   |
| YKR046C     | YKR046C::YKR046C::molecular_function unknown 1 1.2383384                    |             |             |             |             |   |
| 1.123388548 | 1.006642929                                                                 | 0.999005437 | 1           | 1.140785543 | 1.109653819 |   |
| 1.092194906 | 1.223643718                                                                 | 1           | 0.99654908  | 1.285643904 | 2.174293913 |   |
| 0.843621838 | 1                                                                           | 1.75715572  | 2.508421007 | 2.736267898 | 1.935074985 | 1 |
| 0.970903505 | 0.809618749                                                                 | 0.828381064 | 0.925596843 | 1           | 0.88194545  |   |
| 0.93749191  | 1.127766232                                                                 | 1.352820017 | 1.082477055 | 1           | 0.796692506 |   |
| 0.783960786 | 0.578508088                                                                 | 0.888924287 | 1.051820156 | 1           | 0.848612987 |   |
| 0.721721645 | 1.030811492                                                                 | 1.091254716 | 1.130881876 | 1.212739232 |             |   |
| YHR094C     | YHR094C::HXT1::High-affinity hexose (glucose) transporter 1                 |             |             |             |             |   |
| 0.796751033 | 0.499895838                                                                 | 0.645563447 | 0.468890929 | 1           | 0.795883183 |   |
| 0.747563862 | 0.554395196                                                                 | 0.662439014 | 1           | 0.820558707 | 0.441424033 |   |
| 0.457994695 | 0.667892145                                                                 | 1           | 2.693716247 | 0.827059532 | 1.446585784 |   |
| 1.427969232 | 1                                                                           | 1.651079455 | 0.701614572 | 0.477615707 | 0.951093946 | 1 |
| 1.089197838 | 0.938748664                                                                 | 1.288569816 | 1.169274212 | 0.974101826 | 1           |   |
| 0.897428656 | 0.784553201                                                                 | 0.699370785 | 0.835717265 | 0.68819244  | 1           |   |
| 0.813177446 | 0.877166811                                                                 | 1.08060928  | 0.805129999 | 1.03271784  | 0.837096518 |   |
| YKR048C     | YKR048C::NAP1::nucleosome assembly protein I 1 1.103755999                  |             |             |             |             |   |
| 1.196957766 | 0.991819627                                                                 | 0.705739676 | 1           | 1.044848024 | 1.095931163 |   |

1.29572152 1.203898509 1 1.069421596 1.150394304 1.22456176  
1.259106167 1 1.313420095 1.361381437 1.498008997 1.286460261 1  
1.14200242 0.851860188 0.806124131 1.099792043 1 1.050305524  
0.893699122 1.193886591 1.147635286 0.949082762 1 1.075112802  
0.835509974 1.159608771 0.902590114 1 0.965100479 0.838267124  
0.976319017 0.828960896 0.634504198 0.950927634  
YHR096C YHR096C::HXT5::Member of superfamily of monosaccharide transporters  
1 1.239245137 1.12561302 1.47940757 1.001796514 1 1.244789974  
1.466481469 1.288879563 1.548350957 1 1.203264029 1.147323595  
2.872768528 1.477974596 1 2.560139155 1.504750354 2.831807231  
1.587514074 1 0.890249993 1.102495381 0.675492406 0.514375561 1  
0.95302413 0.869469977 1.246193415 1.045783622 0.898928845 1  
0.669203885 0.738838628 0.592837282 0.830679351 0.913398031 1  
1.320546054 1.11825765 1.600852145 1.443963684 1.604986374 0.908897701  
YLR177W YLR177W::YLR177W::molecular\_function unknown 1 0.921055248  
1.040043483 0.90747612 0.760749863 1 0.990308629 1.229463593  
0.743356174 0.676011486 1 1.3692138 1.351022993 1.345152977  
0.798981408 1 2.21851601 1.568604093 1.591984881 1.040779656 1  
1.388042796 1.088928519 0.993521672 0.793260183 1 1.310208864  
1.435494768 1.411062215 1.130138629 1.064861037 1 1.495290818  
0.877037389 1.998175994 1.02922305 1.014515151 1 1.379779677  
0.950491892 0.95116083 0.969965549 1.526863612 0.923783274  
YHR098C YHR098C::SFB3::binds to Sed5p and Sec23p by distinct  
domains<br><u>L</u>ethal with <u>s</u>ec-<u>t</u>hirteen 1 0.899019395  
0.88673249 0.952980329 0.604890274 1 1.258053568 1.202475718  
0.640192818 0.605338857 1 1.094674867 1.118060162 0.494303117  
0.79569309 1.077769121 0.941148882 1.117866371 0.69590127 1  
0.622675242 0.772229249 1 1.28230226 1.039794002  
0.919922123 1.014426313 1 1.171795678 1.342699189 1.077967014  
1.035114223 1.150803755 1 1.188652192 1.220678813 1.004539248  
1.11274151 0.807686319 1.493814518  
YLR179C YLR179C::YLR179C::molecular\_function unknown 1 1.0754599  
1.249287596 0.803206901 0.728679423 1 1.142480639 1.144016455  
0.877156465 0.819180023 1 1.02693431 1.267552797 1.139148013  
0.643863755 1 0.941371162 0.649756188 0.61755333 0.75376766 1  
1.295680108 0.837036737 0.916439423 0.699198235 1 1.081661527  
0.965038423 0.997250824 1.595663378 1.111219727 1 0.859814182  
0.931233595 0.885347829 1.091318583 1.203881016 1 0.76194471  
0.712546683 0.860132848 0.997751672 0.717777321 1.003465128  
YHR100C YHR100C::YHR100C::molecular\_function unknown 1 1.297916742  
1.219918059 0.925987124 1.646567839 1 1.1032201 0.99950838  
1.461415901 1.346936669 1 1.083850391 0.981883197 1.296032367  
1.311780581 1 1.089445262 0.649073743 1.265589614 1  
1.275633472 1.428232009 1.212105885 0.984055163 1 1.135601129  
1.365606628 1.547923457 1.240552065 0.981492304 1 1.059745139  
0.871814307 1.073674618 1.154674808 0.848512724 1 1.140444599  
1.059202915 1.105283905 0.788609648 1.2138976 0.661971729  
YHR102W YHR102W::KIC1::Kinase that interacts with Cdc31p; N-rich kinase 1  
0.998573744 1.027213847 1.240023878 0.802754573 1.187724176  
1.273024781 1.078533734 0.89829388 1.228539072 1.340127397  
0.767747868 1.233526131 1 0.765040686 0.839695032 0.98681862  
0.749660424 1 0.6448156 0.772271545 0.576688724 0.606852391 1  
0.619446044 0.588290414 0.532645884 0.794405361 0.873412314 1  
0.718134727 0.74257211 0.32424076 0.943371219 0.991296646 1  
0.614396016 0.635532892 0.845690454 1.066132724 0.622815363 0.572658082  
YHR104W YHR104W::GRE3::Induced by osmotic stress; similar to xylose  
reductase from other fungi 1 0.864348759 1.274433463 1.549029982



1.080965897 1 1.161026592 1.550283003 1.699874719 1.59190766 1  
1.470430191 3.645560042 7.123940367 2.127340716 1 3.40711447  
4.818925824 8.0235279 5.69631266 1 1.736377116 3.170146609  
5.573568455 3.174561857 1 1.407124797 1.262259043 1.254203086  
0.968942926 1.30536338 1 1.331451404 1.344545747 1.122176743  
1.096174882 1.105873979 1 1.17036143 1.11246797 1.014304164  
1.226253997 1.103482643 1.054251293  
YLR181C YLR181C::VTA1::Hypothetical ORF 1 0.99861892 1.102014419  
0.900638987 1.198682579 1 0.956133694 0.91017178 1.056185557  
1.066911966 1 0.85823937 0.959808534 1.022486743 0.988184709 1  
1.370300227 0.715471866 1.037562245 1.107600125 1 1.484322406  
1.529202675 1.168072907 0.826834605 1 0.849336349 0.869110833  
0.704845628 0.792619486 0.9332552 1 0.996895318 0.926593922  
0.78928992 0.936576129 1.463645187 1 1.01438348 0.94897736  
1.014358893 1.408339766 1.342490523 1.103286232  
YLR183C YLR183C::TOS4::Target of SBF 1 0.791645879 0.806929447  
1.158114116 1.215078678 1 0.978792178 0.965273439 0.972862801  
1.042914371 1 0.569896683 0.461750238 0.592386858 1.523302263 1  
0.841036749 0.466443658 0.695765744  
1.042814348 1.026491249 0.949194318 1.259243537 1 1.003832931  
1.230300261 1.288493039 1.183435437 1.053960289 0.931746312  
1.072929085 0.941143214 1.311684775  
YLR185W YLR185W::RPL37A::Homology to rat L37 1 0.946716704  
1.531655073 0.773219564 1.915574186 1 0.97702229 0.9478064  
1.44928253 1.395082067 1 0.92842594 0.925305282 1.121028087  
0.996258742 1 0.687921873 0.323289944 0.182824453 0.517202982 1  
1.548819796 1.359631807 0.62521205 0.739305863 1 0.893101215  
0.853561726 0.586132527 0.806357549 0.972475862 1 1.331890035  
2.146667323 1.349216404 1.187871878 2.216572499 1 0.843400355  
1.272323539 0.813676975 1.756646525 1.014440978 0.940420177  
YHR118C YHR118C::ORC6::origin recognition complex (ORC) component that binds  
to origins of replication and thereby directs DNA replication and is also  
involved in transcriptional silencing 1 1.137878037 1.259866369  
1.074055638 1.475341359 1 1.148284247 1.240475341 1.710774025 1  
0.923838145 1.000595879 1.305548042 1.071160109 1 0.679281806  
0.690618409 0.624887001 1 0.950850149 1.288282035  
1.625367618 1.181205097 1.118287246 1.122472127 1.533836027  
1.24680419 1 1.116348449 0.534149476 0.544359354 1.076260352  
0.337480224 1 0.643395514 0.470126636 0.515617373 0.574932251  
0.407366791  
YLR187W YLR187W::YLR187W::molecular\_function unknown 1  
1.502262931 1 1.621321297 1.632992668 1.32615619  
1.230601122 1 1.469915247 1.65384487 1.327706398  
0.787385751 0.744036771 1 1.459232793 1  
1.024391563 0.921603223 0.882755955 1.052687223 0.896647555 1  
0.832498042 0.632664451 0.783019557 0.827951633 0.527517976 1  
0.92407467 0.869842849 1.014515722 0.790293274  
YHR120W YHR120W::MSH1::mutS homolog involved in mitochondrial DNA repair 1  
1.241451928 1.055506172 1.513906053 1.330372999 1 1.301093757  
1.167981098 1.289451691 1.415304825 1 1.025319654 0.980338229  
0.952815863 1.341435686 0.854397272 1  
1 1.136889609 1.055731853 1.106519937 1.22600437  
1.20776264 1 0.89586796 0.555789906 1.140324086 0.688914056  
0.322513859 1 0.970112732 0.657955457 0.773569453 0.532140998  
0.474745714 0.674230463  
YLR201C YLR201C::YLR201C::molecular\_function unknown 1 1.211649502  
1.30318121 0.963268026 1.461762413 1 1.197125798 1.225842426

|             |                                                                                                                                          |             |             |             |             |
|-------------|------------------------------------------------------------------------------------------------------------------------------------------|-------------|-------------|-------------|-------------|
| 1.118030386 | 1.229486501                                                                                                                              | 1           | 1.233291467 | 1.271454718 | 2.060231885 |
| 1.037214903 | 1                                                                                                                                        | 1.136129613 | 1.324780925 | 1.581643214 | 1           |
| 1.345817726 | 1.550795426                                                                                                                              | 1.933337543 | 1.464423157 | 1           | 1.139967399 |
| 1.160637111 | 0.939771114                                                                                                                              | 0.929893045 | 1.005955399 |             | 1.250903372 |
| 1.45069503  | 1.507734163                                                                                                                              | 1.270099875 | 1.777473581 | 1           | 1.280290327 |
| 1.346386337 | 1.434278784                                                                                                                              | 1.692141292 | 1.512202646 |             |             |
| YHR122W     | YHR122W::YHR122W::molecular_function                                                                                                     | unknown     | 1           | 1.37706026  |             |
| 1.235048442 | 0.935606553                                                                                                                              | 1.535335046 | 1           | 0.998925212 | 0.895963967 |
| 1.515911012 | 1.361099824                                                                                                                              | 1           | 1.352594744 | 1.290481256 | 1.036517716 |
| 1.304260565 | 1                                                                                                                                        | 1.120971608 | 0.698638901 | 0.438616052 | 1.264950241 |
| 1.515369453 | 1.569378188                                                                                                                              | 1.230799785 | 1.221452425 | 1           | 2.600946986 |
| 5.791753272 | 7.430317855                                                                                                                              | 2.852189106 | 1.546565582 | 1           | 2.359134431 |
| 6.252151006 | 8.728924016                                                                                                                              | 8.782483434 | 5.406789769 | 1           | 2.712027528 |
| 5.675030684 | 5.761386173                                                                                                                              | 2.891914176 | 1.265048139 | 2.752086133 |             |
| YLR203C     | YLR203C::MSS51::Protein required for the maturation and translation of COX1 mRNA                                                         | 1           | 0.995228489 | 1.099697266 | 1.229412977 |
| 1.214912746 | 1.380529027                                                                                                                              | 0.934211974 | 0.906526432 | 1           | 1.250454287 |
| 1.212688755 | 1.213204424                                                                                                                              | 0.868329468 | 1           | 1.504070158 | 1.521752222 |
| 1.59882181  | 1.33351918                                                                                                                               | 1           | 0.686396849 | 0.904801829 | 0.777802885 |
| 0.553284189 | 1                                                                                                                                        | 1.049968216 | 0.958596658 | 1.340311562 | 1.149432344 |
| 0.887829184 | 1                                                                                                                                        | 1.08682415  | 0.74241274  | 0.991370143 | 0.758485943 |
| 0.507265793 | 1                                                                                                                                        | 1.017815    | 0.782061084 | 0.896100097 | 0.674562932 |
| 1.056569703 | 1.107664347                                                                                                                              |             |             |             |             |
| YHR124W     | YHR124W::NDT80::Meiosis-specific gene; mRNA is sporulation specific; required for exit from pachytene and for full meiotic recombination | 1           |             |             |             |
| 1.310476278 | 1.272312885                                                                                                                              | 1.24233872  | 1.428589265 | 1           | 1.257311191 |
| 1.236597229 | 1.497082253                                                                                                                              | 1           | 1.308389721 | 1.196020896 | 1.539913997 |
| 1.168431661 | 1                                                                                                                                        | 0.83693214  | 1.159287365 | 1           | 0.842711757 |
| 1.751186097 | 0.822405786                                                                                                                              | 1.877042829 | 1           | 0.804015983 | 0.72789932  |
| 0.811109746 | 0.957429748                                                                                                                              | 0.984174139 | 1           | 0.694709437 | 0.439909831 |
| 0.594914116 | 0.987291682                                                                                                                              | 0.406410091 | 1           | 0.683137439 | 0.578256477 |
| 0.82589274  | 0.686526054                                                                                                                              | 0.73166659  | 0.542886884 |             |             |
| YLR205C     | YLR205C::HMX1::Homology to heme oxygenases                                                                                               | 1           | 1.177772235 |             |             |
| 1.60092985  | 0.960900514                                                                                                                              | 1.932139567 | 1           | 1.011433605 | 1.162915513 |
| 1.531572654 | 1.382182816                                                                                                                              | 1           | 1.396658544 | 3.016551365 | 1.743024697 |
| 0.664649803 | 1                                                                                                                                        | 2.089357388 | 1.42142382  | 1.063165225 | 1.104633562 |
| 3.802136471 | 5.606500593                                                                                                                              | 2.225734846 | 1.275978458 |             |             |
| 0.815254942 | 1                                                                                                                                        |             |             |             |             |
| 1.112918128 |                                                                                                                                          |             |             |             |             |
| YHR126C     | YHR126C::YHR126C::molecular_function                                                                                                     | unknown     | 1           | 1.410713732 |             |
| 1.320998345 | 1.241250692                                                                                                                              | 1.540144759 | 1           | 1.285364798 | 1.314789478 |
| 0.978053538 | 1.177686756                                                                                                                              | 1           | 2.207706941 | 2.263929767 | 1.528690122 |
| 1.014228387 |                                                                                                                                          | 0.595445837 |             |             |             |
| 0.252000741 | 1                                                                                                                                        | 0.66934204  | 1.030633771 | 0.718372187 | 1.185779741 |
| 1.046009906 | 1                                                                                                                                        | 0.669562463 | 0.649531686 | 0.893879391 | 0.846184419 |
| 0.527895837 | 1                                                                                                                                        | 0.620283742 | 0.693753502 |             |             |
| YLR207W     | YLR207W::HRD3::HMG-CoA Reductase Degradation                                                                                             | 1           | 0.80695322  |             |             |
| 0.708831075 | 1.190805786                                                                                                                              | 0.727891509 | 1           | 1.075940829 | 1.141393863 |
| 0.690202332 | 0.728174761                                                                                                                              | 1           | 1.035984643 | 1.098194559 | 0.556696254 |
| 0.962405561 | 1                                                                                                                                        | 1.185815276 |             | 1           | 0.882464804 |
| 0.662628412 | 1                                                                                                                                        | 1.03237228  | 1.107897892 | 1.370373901 | 1.123062677 |
| 1.008687179 | 1                                                                                                                                        | 1.039258086 | 0.765913499 | 1.074673947 | 1.063655652 |
| 0.531877152 | 1                                                                                                                                        | 0.826212986 | 0.699098305 | 1.127598339 | 0.653491637 |
| 0.828450864 | 0.83184279                                                                                                                               |             |             |             |             |
| YHR128W     | YHR128W::FUR1::Regulation of the pyrimidine salvage pathway                                                                              | 1           |             |             |             |
| 1.268300923 | 0.942818074                                                                                                                              | 0.70245137  | 0.846465378 | 1           | 1.126760688 |
| 0.95980944  | 0.753800385                                                                                                                              | 0.774251323 | 1           | 0.992089669 | 0.736945641 |

|             |                                                                                                                                                                                                              |             |             |             |             |             |
|-------------|--------------------------------------------------------------------------------------------------------------------------------------------------------------------------------------------------------------|-------------|-------------|-------------|-------------|-------------|
| 0.553523683 | 0.472721746                                                                                                                                                                                                  | 1           | 0.605972327 | 0.336371607 | 0.303339641 |             |
| 0.609579283 | 1                                                                                                                                                                                                            | 0.770922761 | 0.392883006 | 0.522017246 | 1           |             |
| 0.685290149 | 0.470880283                                                                                                                                                                                                  | 0.571396539 | 0.592648408 | 0.497434767 | 1           |             |
| 1.061002758 | 0.859347157                                                                                                                                                                                                  | 0.986112811 | 1.473807558 | 0.791305827 | 1           |             |
| 1.099759497 | 1.160571705                                                                                                                                                                                                  |             | 1.535347974 | 0.656677741 | 0.880002116 |             |
| YLR209C     | "YLR209C::PNP1::purine nucleoside phosphorylase, specifically metabolizes inosine and guanosine nucleosides"                                                                                                 |             |             |             |             |             |
|             | 1                                                                                                                                                                                                            |             | 1.015021569 | 0.968645973 |             |             |
| 0.865154001 | 0.824718965                                                                                                                                                                                                  | 1           | 1.015583621 | 1.046442005 | 0.838356032 |             |
| 1.043800406 | 1                                                                                                                                                                                                            | 0.917588581 | 1.0115242   | 1.035143283 | 0.823850915 | 1           |
| 1.36139245  | 1.060720702                                                                                                                                                                                                  | 0.949979803 | 0.586031951 | 1           | 1.040475544 |             |
| 0.767041155 | 0.460747206                                                                                                                                                                                                  | 0.75120165  | 1           | 1.006424836 | 0.93659847  |             |
| 1.045865872 | 1.075621356                                                                                                                                                                                                  | 0.996138361 | 1           | 1.032784293 | 0.749751776 |             |
| 0.858155714 | 0.924953612                                                                                                                                                                                                  | 0.803038341 | 1           | 0.841587947 | 0.652503577 |             |
| 0.864577443 | 0.728921408                                                                                                                                                                                                  | 0.855706084 | 0.985077    |             |             |             |
| YHR142W     | YHR142W::CHS7::The seventh gene identified that is involved in chitin synthesis; involved in Chs3p export from the ER                                                                                        |             |             |             |             |             |
|             | 1                                                                                                                                                                                                            |             | 1.286096734 |             |             |             |
| 1.034006719 | 0.849666301                                                                                                                                                                                                  | 0.764740164 | 1           | 1.027371686 | 0.976839944 |             |
| 1.060879683 | 0.992058378                                                                                                                                                                                                  | 1           | 0.859488137 | 0.82719356  | 0.961546454 |             |
| 0.753471072 | 1                                                                                                                                                                                                            | 1.295396621 | 0.817541669 | 1.157458233 | 1.351535877 | 1           |
| 1.154330281 | 0.975273127                                                                                                                                                                                                  | 1.227420331 | 0.928333286 | 1           | 1.06815196  |             |
| 1.256521501 | 0.868480852                                                                                                                                                                                                  | 0.928898015 | 1.301018325 | 1           | 1.227686263 |             |
| 2.065712678 | 1.058923712                                                                                                                                                                                                  | 1.214251894 | 1.548329961 |             | 0.739715702 |             |
| 1.018608803 | 0.980129538                                                                                                                                                                                                  | 0.93568442  | 0.902321066 | 1.155823726 |             |             |
| YLR211C     | YLR211C::YLR211C::molecular_function unknown                                                                                                                                                                 |             |             |             |             |             |
|             | 1                                                                                                                                                                                                            |             | 1.042495061 |             |             |             |
| 1.303171218 | 1.231970948                                                                                                                                                                                                  | 1.635691659 | 1           | 1.019031687 | 1.376407942 |             |
| 1.350495006 | 1.575895473                                                                                                                                                                                                  | 1           | 1.120287823 | 1.388944256 | 1.594424773 | 1           |
| 0.274627216 |                                                                                                                                                                                                              | 0.321860437 | 0.400998755 | 1           | 1.275094556 | 1.910152079 |
| 1.63895672  | 1                                                                                                                                                                                                            | 0.840697033 |             | 0.920026933 | 0.892764683 | 1           |
| 0.904582827 | 0.857669667                                                                                                                                                                                                  | 1.08002829  | 1.204278905 | 1.173863612 | 1           |             |
| 1.002345831 | 0.971267609                                                                                                                                                                                                  | 1.264554293 | 0.961074504 | 1.260247113 | 0.829215951 |             |
| YHR143W     | YHR143W::DSE2::Daughter Specific Expression 2                                                                                                                                                                |             |             |             |             |             |
|             | 1                                                                                                                                                                                                            |             | 1.728697486 |             |             |             |
| 0.986749328 | 1.444928419                                                                                                                                                                                                  | 1.351359216 | 1           | 1.208369434 | 1.063518574 |             |
| 1.047721502 | 1.275064145                                                                                                                                                                                                  | 1           | 1.245188747 | 0.996571235 | 0.969006706 |             |
| 1.085241416 | 1                                                                                                                                                                                                            | 0.670855735 | 0.583064286 | 0.697772129 | 0.852904371 | 1           |
| 0.440572836 | 0.33907293                                                                                                                                                                                                   | 0.442363897 |             | 1           | 0.999212655 | 0.927818347 |
| 0.553133528 | 0.911016983                                                                                                                                                                                                  | 0.776447948 | 1           | 1.933771975 | 1.86498589  |             |
| 0.906606755 | 0.615218751                                                                                                                                                                                                  |             | 1           | 1.124608646 | 1.1281895   | 0.437683394 |
| 1.196499374 | 0.722106729                                                                                                                                                                                                  | 0.872121497 |             |             |             |             |
| YHR145C     | YHR145C::YHR145C::molecular_function unknown                                                                                                                                                                 |             |             |             |             |             |
|             | 1                                                                                                                                                                                                            |             | 1.333990666 |             |             |             |
| 1.541842351 | 1.107858879                                                                                                                                                                                                  | 1.462139053 | 1           | 1.091020872 | 0.947801809 |             |
| 1.692603068 | 1.539086962                                                                                                                                                                                                  | 1           | 1.295561885 | 1.481795955 | 2.341397384 |             |
| 1.355672285 | 1                                                                                                                                                                                                            | 1.351710675 | 0.948380427 | 1.137926241 | 1.53939272  | 1           |
| 1.271902242 | 2.939365292                                                                                                                                                                                                  | 1.671214955 | 0.984254128 | 1           | 0.856291796 |             |
| 0.661626936 | 0.892239997                                                                                                                                                                                                  | 1.233519545 | 1.187283469 | 1           | 0.700272953 |             |
| 0.846833835 | 0.500836346                                                                                                                                                                                                  | 0.792764048 | 1.229883971 | 1           | 0.745260807 |             |
| 0.784958875 | 0.866802652                                                                                                                                                                                                  | 1.238438118 | 0.539413885 | 1.034111939 |             |             |
| YHR147C     | YHR147C::MRPL6::Mitochondrial ribosomal protein MRPL6 (YmL6)                                                                                                                                                 |             |             |             |             |             |
|             | 1                                                                                                                                                                                                            |             |             |             |             | 1           |
| 1.060043529 | 1.26449887                                                                                                                                                                                                   | 1.089906362 | 1.458038013 | 1           | 0.906003405 |             |
| 1.017441911 | 1.591533472                                                                                                                                                                                                  | 1.428276094 | 1           | 0.976642665 | 0.975931327 |             |
| 1.40789776  | 1.126149896                                                                                                                                                                                                  | 1           | 1.342565364 | 1.083025184 | 1.230036745 |             |
| 1.526368898 | 1                                                                                                                                                                                                            | 1.733914187 | 1.772690773 | 1.74038677  | 1.45025415  | 1           |
| 0.935730033 | 1.028908366                                                                                                                                                                                                  | 0.804364365 | 1.053725404 | 0.927988016 | 1           |             |
| 0.793298917 | 0.915346646                                                                                                                                                                                                  | 0.77147639  | 1.133429628 | 1.642345337 | 1           |             |
| 1.103110925 | 1.154761927                                                                                                                                                                                                  | 1.265989506 | 1.668259368 | 1.2792032   | 1.349336592 |             |
| YDR035W     | "YDR035W::ARO3::DAHP synthase; a.k.a. phospho-2-dehydro-3-deoxyheptonate aldolase, phenylalanine-inhibited; phospho-2-keto-3-deoxyheptonate aldolase; 2-dehydro-3-deoxyphosphoheptonate aldolase; 3-deoxy-D- |             |             |             |             |             |

arabine-heptulosonate-7-phosphate synthase" 1 1.133419634 1.094848431  
1.020702236 0.790283726 1 1.066038518 1.040073294 0.892465767  
0.865167155 1 1.547154787 1.409579574 0.609985426 0.726942469 1  
1.370064051 1.142708047 0.900861588 0.510970097 1 0.942234237  
0.694702089 0.481049811 0.390753641 1 1.026486468 0.718775217  
0.786720658 1.625927508 1.233189649 1 1.125217068 0.602710428  
0.395896457 0.566885072 0.609383267 1 0.857135326 0.52337583  
0.669777321 0.762493993 0.559287354  
YDR037W YDR037W::KRS1::lysyl-tRNA synthetase 1 0.970536079  
0.813628632 0.875462455 0.868937299 1 0.982587001 0.860815004  
0.740148573 0.763958931 1 0.848656743 0.777186047 0.364216217  
0.685435276 1 1.02222218 0.653833348 0.436213661 0.505019884 1  
0.738719546 0.460743748 0.237898064 0.441374082 1 0.95199043  
0.681132544 0.673295913 1.011134878 0.802538831 1 1.312064845  
1.059901618 0.753575496 0.897181072 0.652826152 1 0.777493192  
0.70977363 0.607615294 0.70413891 0.469564537  
YDR039C YDR039C::ENA2::plasma membrane protein; putative Na+ pump; P-type  
ATPase 1 1.129801698 0.740315877 1.444957772 0.67202533 1  
1.302642289 1.229297351 0.921276555 0.938279886 1 1.006662098  
0.907083425 0.544744515 1.062938522 1 0.844790117 0.625585038  
0.715799201 0.426739891 1 0.760506791 0.56096491  
0.93144578 0.968902625 1.131470739 0.789419389 1 1.329578224  
1.665692823 1 0.83556908 0.678840774 1.35741746  
0.646747488 1.386112744  
YDR039C YDR039C::ENA2::plasma membrane protein; putative Na+ pump; P-type  
ATPase  
1 1.154599621 1.108461032 1.603210585 1.748128323 1.34069065 1  
0.938033976 0.452698742 0.385422879 0.613130491 0.34653099 1  
0.811446566 0.503298502 0.975534601 0.679179105 0.553986163 0.83184279  
YDL134CA YDL134CA 1 1.29075201 1.844990281 1.206326143 2.29365611 1  
1.199535602 1.291653731 2.213298573 1.64196108 1 0.986372904  
1.487274728 1.882678777 1.177657241 0.659877636 0.385071372  
0.303405498 0.361703653 1 1.838487581 1.873352156 1.009267639  
0.805481637 1 0.819769721 0.812096901 0.541932919 0.612016852  
1.3709263 1 1.555207688 2.34622547 1.488133811 1.482591494  
2.790193128 1 1.336253435 2.338968455 1.865828823 3.235445795  
2.061455872 1.352839042  
YDR041W YDR041W::RSM10::mitochondrial ribosome small subunit component 1  
0.953158905 1.469295328 1.250802883 1.761343049 1 1.023072067  
1.2053349 1.683180596 1.558179267 1 0.998253812 1.235691521  
1.693235997 1.20617679 1 1.677203504 1.027861727 1.013614892  
2.218751818 1 1.764213334 1.700320271 1 1.055245814  
1.198937746 0.961597449 0.781836739 0.998826019 1 1.223481876  
1.622121845 1.056118408 1.059215045 1.654347533 1 1.485922017  
1.442521382 1.003661263 1.452261226 1.714380101 1.378232177  
YER087CA YER087CA::SBH1::protein transporter 1 1.533537051 1.603373852  
1.010209189 1.63779894 1 1.142163076 1.094092708 1.85414779  
1.50256589 1 1.264492104 1.339969104 1.846750901 1.208145505 1  
1.169294279 1.872340006 1.426796632 1.116775305 1 1.010919179  
1.119956207 0.76490196 0.672675919 1 1.187472719 1.081074136  
0.673073196 0.863923974 0.807853364 1 0.89151258 1.341460105  
0.84386823 0.784948999 1.375981275 1 1.009829021 1.242784181  
0.860664846 1.604372694 1.088947455 1.682073707  
YLR225C YLR225C::YLR225C::molecular\_function unknown 1 0.759334125  
0.970687019 0.923788435 1.146467729 1 1.012302885 0.97589124  
0.918805209 0.89723805 1 0.914422579 1.203352677 0.992877718

0.972351769 1 1.074194903 1.064446414 1.033947377 0.759627755 1  
 1.870062387 1.315394295 1.523330498 1.351661973 1 1.154317944  
 1.513407476 1.087520995 0.955669755 1.19503724 1 1.009891569  
 1.146348099 1.344407577 1.122519478 1.3687971 1 1.403168949  
 1.341627355 1.239196281 1.4516954 1.610355829 1.287167305  
 YDR055w YDR055w::PST1::Protoplasts-secreted 1 0.830885783 0.817048215  
 1.165777516 0.985188308 1 1.02610555 1.141658845 0.984510676  
 1.108206482 1 0.938244334 1.126453557 1.07632967 0.811962028 1  
 1.621819034 2.235456613 2.569593574 1.442835037 1 0.966759295  
 1.045378629 1.175133965 1.366898469 1 1.040034017 1.137961981  
 1.201170187 1.141188521 1.148104001 1 0.90221709 0.96115298  
 0.573152914 0.383413851 0.916800963 1 0.8653574 0.73955285  
 0.635420295 0.932656481 0.86852774 1.796780488  
 YIL071C YIL071C::PCI8::Proteasome-COP9 signalosome-eukaryotic Initiation  
 factor 3 (PCI) domain-containing protein 1 0.835711509 0.947262148  
 1.050359943 0.976133326 1 0.906474745 1.002012324 1.040689122  
 0.875643142 1 0.94800321 1.093508922 1.044574639 1.096888044 1  
 1.041403121 0.846554311 1.184546808 1.452452345 1 1.284575886  
 2.198284053 2.892668803 1.178893148 1 1.040173001 1.375716236  
 1.035389346 0.915386811 1.1412623 1 1.140872904 1.338353138  
 1.225453378 1 1.499224291 1.237837874 1.51705691 0.705971886  
 2.164287653 1.210988006  
 YLR227C YLR227C::ADY4::Accumulation of dyads 1 1.162400051  
 1.167983206 0.970642138 1.651526272 1 0.98608352 0.989072321  
 1.387038466 1.355197843 1 0.821644995 0.883915399 1.184132056  
 1.025935986 1 0.628314676 0.509218232 0.611300897 1.07128506 1  
 1.621927603 2.642026673 1.779287936 1.717592736 1 0.901514617  
 0.972478854 0.708564638 0.790192799 1 0.921717677 1.115550058  
 1.064230823 1.002344042 1.572476231 1 0.935125038 1.34418008  
 1.099449693 1.647024617 1.31335545 1.458789592  
 YDR057w YDR057w::YDR057W::molecular\_function unknown 0.866826043  
 0.999882228 1.172935182 1.243290611 0.974636049 1.171973629  
 1.328954968 1.070518492 0.936776076 1.055601593 1.003798226  
 1.294223484 1 1.064723323 0.739653696 0.948461628 1.337074847 1  
 1.485920141 1.978455563 1.838693728 1 0.959566404 1.211113246  
 0.927797502 0.948172265 1.021357577 1 0.988802111 1.183422965  
 1.040228779 1.066491404 1.278583904 1 1.257957942 1.230527135  
 1.281842443 1.395163494 1.233616004 0.966688872  
 YML094W "YML094W::GIM5::Prefoldin subunit 5; putative homolog of subunit 5  
 of bovine prefoldin, a chaperone comprised of six subunits" 1 0.748292095  
 1.295995205 0.778155196 1.695345573 1 0.748820696 0.818747657  
 1.591937109 1.303414911 1 0.842930026 0.832806255 1.086001479  
 1.05092514 1 0.607324927 0.489153912 0.478109779 0.900647529 1  
 1.011671829 1.301885873 1.435283476 1.150632014 1 1.046869519  
 0.910029971 0.441728566 0.559662706 0.855856016 1 1.298241654  
 1.504560026 1.040651098 1.090997709 2.801343204 1 0.967543588  
 1.319716518 0.876234448 1.889847471 1.035824484 1.499943964  
 YLR229C YLR229C::CDC42::cell division cycle blocked at 36 degree C 1  
 1.308173545 1.185992983 0.829013368 1.388982208 1 1.022586696  
 1.059927261 0.931726447 1.064244444 1 1.224473249 1.005527269  
 1.199109415 0.820311269 1 1.269900981 0.742626235 0.755699913  
 1.036764407 1 1.163838515 0.878847652 0.773266177 0.707335916 1  
 1.012240699 0.983576134 0.610950836 0.891546964 0.702713136 1  
 0.896082204 0.907622229 0.650399409 0.64486525 1.055463964 1  
 0.938335921 0.963318892 0.874213699 1.468908509 1.186792581 1.100659341  
 YDR059C YDR059C::UBC5::ubiquitin-conjugating enzyme 1 1.170484812  
 1.588530913 1.227301522 1.850059812 1 1.036242392 1.336574508

|             |                                                                     |             |             |             |             |
|-------------|---------------------------------------------------------------------|-------------|-------------|-------------|-------------|
| 1.902311761 | 1.833547297                                                         | 1           | 1.662037027 | 2.047252004 | 3.809757084 |
| 1.47751972  | 1                                                                   | 2.134275231 | 2.036097487 | 3.148215225 | 4.152705165 |
| 1.8534525   | 4.373541728                                                         | 4.379339298 | 1.61601088  | 1           | 1.510232923 |
| 1.71371971  | 1.206403254                                                         | 0.9582511   | 0.887350695 | 1           | 1.235087734 |
| 2.707052786 | 2.068875892                                                         | 1.173732647 | 1.313093155 | 1           | 1.720125371 |
| 2.387267403 | 1.183522877                                                         | 1.133920897 | 1.905559462 | 1.484182726 |             |
| YHR149C     | YHR149C::YHR149C::molecular_function                                | unknown     | 1           | 0.68465297  |             |
| 0.63801502  | 0.995568124                                                         | 0.731280916 | 1           | 0.784154496 | 0.825090816 |
| 0.807182129 | 0.832813743                                                         | 1           | 0.548115611 | 0.420205661 | 0.366981061 |
| 0.964790196 | 0.840436545                                                         | 0.805820265 | 0.739147397 | 1.169004183 | 1           |
| 0.653435699 | 0.688777135                                                         | 1.273114856 | 1           | 0.990179817 | 0.963592672 |
| 0.816191642 | 0.790732186                                                         | 1.158590854 | 1           | 1.003543494 | 0.958824039 |
| 1.158096158 | 0.865187553                                                         | 1.132738728 | 1           | 0.768471225 | 1.143721698 |
| 0.854481297 | 1.077437163                                                         | 0.750896702 | 1.240759256 |             |             |
| YML095CA    | YML095CA::YML095C-A::molecular_function                             | unknown     | 1           | 1.02669136  |             |
| 1.223775014 | 1.072278942                                                         | 1.857647457 | 1           | 1.029311345 | 0.993562571 |
| 1.41661564  | 1.456177544                                                         | 1           | 1.090577622 | 1.035910307 | 1.084071095 |
| 1.329010832 | 1                                                                   | 0.629870446 | 0.290948857 | 0.446479164 | 0.817215446 |
| 1.200544418 | 0.791418024                                                         | 1.302761441 | 1.339050909 | 1           | 1.062002043 |
| 0.978036433 | 0.483116642                                                         | 0.734434257 | 0.86499884  | 1           | 1.137428897 |
| 1.533919186 | 0.728545992                                                         | 1.027745968 | 1           | 1.13239417  | 1.082127656 |
| 0.851744998 | 1.036498326                                                         | 1.132181817 |             |             |             |
| YLR231C     | YLR231C::BNA5::Biosynthesis of Nicotinic Acid                       | 1           | 1.090162958 |             |             |
| 0.997715802 | 1.03498919                                                          | 0.828376247 | 1           | 1.095698371 | 1.253583774 |
| 1.17995367  | 1.141765013                                                         | 1           | 1.052519102 | 1.130769523 | 1.127482234 |
| 1.375940852 | 1                                                                   | 1.085923049 | 0.754166477 | 0.8879593   | 1.306587451 |
| 1.196245718 | 1.389009215                                                         | 1.362014663 | 1.464732246 | 1           | 1.105947972 |
| 1.118841984 | 1.374611072                                                         | 1.362299277 | 1.080170194 | 1           | 0.657286375 |
| 0.668253962 | 0.748304285                                                         | 1.110621528 | 1.091112261 | 1           | 0.756792879 |
| 0.852440451 | 1.001018117                                                         | 1.003210326 | 1.5625946   | 0.765295387 |             |
| YDR061w     | YDR061w::YDR061W::molecular_function                                | unknown     | 1           | 0.752545756 |             |
| 0.915452947 | 1.013068799                                                         | 0.829067706 | 1           | 1.024692114 | 1.0579771   |
| 0.943818773 | 1                                                                   | 1.067482968 | 1.173490006 | 0.818934667 | 1.024731065 |
| 1.495590499 | 1.339402817                                                         | 1.668797537 | 1.374712748 | 1           | 1.129445023 |
| 1.37358221  | 1.609549256                                                         | 0.928824886 | 1           | 1.015081074 | 0.969490271 |
| 1.030891687 | 1.014483312                                                         | 0.943836457 | 1           | 1.103031577 | 0.920068586 |
| 0.894842806 | 0.936671016                                                         | 0.958879428 | 1           | 1.073983282 | 1.005596073 |
| 1.014760565 | 0.819552799                                                         | 1.246215266 | 0.915902707 |             |             |
| YHR151C     | YHR151C::YHR151C::molecular_function                                | unknown     | 1           | 0.933667685 |             |
| 0.703421283 | 0.848676543                                                         | 0.724780739 | 1           | 0.929369498 | 0.977086753 |
| 0.743984545 | 1                                                                   | 0.898645405 | 0.57365304  | 0.528143357 | 0.703023657 |
| 0.513079253 | 0.303959655                                                         | 0.511156433 | 0.575526726 | 1           | 0.934775067 |
| 1.175575889 | 1.195459395                                                         | 1.123098278 | 1           | 0.887099481 | 1.015804127 |
| 0.900860836 | 1.173429253                                                         | 1           | 1.280996351 | 1.049631139 | 0.936807154 |
| 1.134949257 | 1.031915384                                                         | 1           | 0.966904655 | 0.955601997 | 0.979429625 |
| 0.920339947 | 0.751314093                                                         | 0.679484244 |             |             |             |
| YML124C     | YML124C::TUB3::alpha-tubulin                                        | 1           | 0.852649245 | 0.890683227 |             |
| 0.786591162 | 0.710204517                                                         | 1           | 0.860933893 | 0.876703251 | 0.897364844 |
| 0.827627163 | 1                                                                   | 0.925609544 | 0.921157537 | 0.70250606  | 0.852593932 |
| 0.872940857 | 0.567645621                                                         | 0.733253389 | 0.681140769 | 1           | 1.095635724 |
| 0.94302813  | 0.874135488                                                         | 0.95038934  | 1           | 1.142164101 | 1.114586093 |
| 1.308642112 | 1.201006493                                                         | 1.025010271 | 1           | 1.040965375 | 1.117571794 |
| 0.96708812  | 1.057607507                                                         | 0.835719316 | 1           | 1.013513753 | 0.961767166 |
| 0.916521588 | 0.911303339                                                         | 0.83580255  | 1.079644427 |             |             |
| YLR233C     | YLR233C::EST1::Telomere elongation protein (ever shorter telomeres) |             |             |             |             |
| 1           | 0.81734612                                                          | 0.862794711 | 1.054249604 | 0.938591212 | 1           |
| 1.022517031 | 0.807913648                                                         | 1           | 0.782105183 | 0.718945311 | 0.711610335 |

1.133959688 1 0.771329723 0.506929574 0.669158422 0.578410318 1  
1.109870102 1.146843614 0.914935229 1 0.835535733 0.800134685  
0.824644898 0.880631774 0.94619695 1 0.992886437 0.896127858  
0.922900442 1.17330873 1 0.929804787 1.077593684  
0.906222061 1.594190049 0.889634012  
YDR063w YDR063w::YDR063W::molecular\_function unknown 1 0.998434815  
1.446742831 1.079632966 1.781714888 1 1.047214618 1.134771723  
1.830475005 1.620560376 1 0.934181129 1.49301435 2.458431056  
1.214295796 1 1.624132677 1.295511464 1.750954876 2.065157264 1  
1.951839092 3.308138489 3.27984545 1.407425587 1 0.960328276  
0.854515517 0.871199273 0.737684638 1.020115491 1 1.117976152  
1.840919602 1.616963844 1.611942601 1.981845377 1 1.197581216  
1.425792004 1.199076119 1.328600779 2.011177367 1.14706739  
YHR165C YHR165C::PRP8::protein involved in mRNA splicing; lies at the  
catalytic center of the spliceosome; makes extensive contacts with the U5 snRNA  
and with the pre-mRNA 1 1.105665543 0.945409354 1.009483377 0.966335423 1  
0.958193855 0.951208399 0.99085792 0.97218786 1 1.135182758  
0.914967568 0.936145859 1.008081896 1 0.921897501 0.81197193  
0.940400376 0.933673169 1 1.014451153 0.992005711 1.016143545  
0.880222686 0.611146241 0.678939063 1.509597175 1.312828364 1  
0.508234934 0.225772894 0.347861875 0.695126289 1 0.429305678  
0.244116683 0.609475031 0.580148441 0.492651726 0.663723006  
YMR325W YMR325W::YMR325W::molecular\_function unknown 1 1.298990256  
1.526429791 1.011594792 1.707460972 1 1.150489633 1.127098577  
1.790033346 1.649460042 1 1.429313874 1.305334575 2.494022524  
1.408795497 1 1.282958569 1.06064667 1.299621692 1.087967788 1  
1.527382128 2.694670913 1.995032231 1.465126393 1 1.16027027  
1.231948493 1.017464229 0.97227223 1.213463293 1 0.927799498  
1.736987908 1.507562422 1 1.333408 1.88749629  
1.148945516 1.602019578 1.344434929 1.25914728  
YLR249W "YLR249W::YEF3::contains two ABC cassettes, and binds and hydrolyses  
ATP" 1 0.91168256 0.568972329 0.842183775 0.53682708 1 0.976551278  
0.840682245 0.499754064 0.632698435 1 0.826924633 0.430864072  
0.179693665 0.661816201 1 0.538128959 0.217929957 0.163563877  
0.19953399 1 0.324043823 0.120835906 0.07263145 0.29022715 1  
1.158851524 0.672309028 0.76670769 1.46036492 0.8944449412 1  
0.71934125 0.434924579 0.359346203 0.50119272 0.305159441 1  
1.02597772 0.547079896 1.315846404 0.774649406 0.446712875 0.541135607  
YDR065w YDR065w::YDR065W::molecular\_function unknown 1 0.877929107  
1.202805214 1.511806519 0.972244897 1 1.151026879 1.226692944  
1.635610657 1.316155938 1 1.021914993 1.345450768 1.190297021  
1.50766327 1 0.609355113 0.826635316 1.489393401 0.861463294 1  
0.597532687 0.992128845 0.606270211 0.442667398 1 0.784784729  
0.883989799 0.847962007 0.891483822 0.994073945 1 0.911929048  
1.393323632 0.783870161 1 0.705096115 0.660917656 0.896969631  
0.387859153 1.225020723 0.919405158  
YHR167W YHR167W::THP2::affects transcription elongation 1 1.380887886  
1.265493444 1.163608941 1.30392909 1 1.045560873 1.114852936  
1.409456049 1.05568942 1 1.206693684 1.050505004 1.106616853  
1.199689513 1 1.16186701 0.981385861 1.045512807 1.480351566 1  
1.292575575 1.214411696 1.282427327 1.333732841 1 1.075747167  
0.943799666 0.933470434 1.170648855 1.4120765 1 0.967561677  
0.545868986 0.691655926 1.054522053 0.641395575 1 0.903275094  
0.784879614 0.834552005 0.851669109 0.674230463  
YLR251W YLR251W::SYM1::stress-induced yeast MPV17 homolog 1  
1.18048407 1.913830234 1.359752385 1.491584295 1 1.333654508  
1.733848038 1.652566646 1 1.829367122 2.532699415 4.144014906

|             |                                                                                         |             |             |             |             |             |
|-------------|-----------------------------------------------------------------------------------------|-------------|-------------|-------------|-------------|-------------|
| 1.662128917 | 1                                                                                       | 2.134337358 | 1.998929834 | 2.517043137 | 2.329986029 | 1           |
| 3.682566952 | 3.436636794                                                                             | 6.702205476 | 2.58595931  | 1           | 1.384678764 |             |
| 2.143819452 | 1.641273418                                                                             | 1.191846738 | 1.351442908 | 1           | 1.471956508 |             |
| 1.404427894 | 1.640723877                                                                             | 0.981046692 | 1.659806305 | 1           | 2.063313712 |             |
| 1.410758488 | 1.189980624                                                                             | 1.113287946 | 3.181930555 | 1.322192232 |             |             |
| YHR169W     | "YHR169W::DBP8::Dead-Box Protein 8, ATP-dependent helicase involved in rRNA processing" |             |             |             |             |             |
| 1           | 0.84905152                                                                              | 0.7654735   | 1.126343794 | 0.891117748 | 1           |             |
| 0.85926681  | 0.762434226                                                                             | 1.070182103 | 1.22541715  | 1           | 0.457082795 |             |
| 0.366134822 | 0.393804638                                                                             | 1.212984872 | 1           |             | 0.289371094 |             |
| 0.544345815 | 1                                                                                       | 0.359193352 | 0.430766199 |             | 0.787563352 | 1           |
| 0.993638917 | 1.203124531                                                                             | 0.980205304 | 1.089479391 | 1.212930284 | 1           |             |
| 1.108899652 | 1.359838381                                                                             | 1.134670065 | 1.05909214  | 1.298971871 | 1           |             |
| 1.12783769  | 1.079706186                                                                             | 0.91793776  | 1.139821285 | 0.821785295 | 1.315187225 |             |
| YLR253W     | YLR253W::YLR253W::molecular_function unknown                                            |             |             |             |             |             |
| 1           |                                                                                         |             |             |             | 0.806524184 |             |
| 0.928543732 | 0.985560687                                                                             | 0.953592397 | 1           | 0.922795049 | 1.070794998 |             |
| 1.012010944 | 0.993278523                                                                             | 1           | 0.932510074 | 0.818103499 | 0.682588252 |             |
| 0.800592266 | 1                                                                                       | 0.796457894 | 0.588347252 | 0.559734783 | 0.727389061 | 1           |
| 1.151662146 | 1.212601866                                                                             | 1.065884838 | 0.997524946 | 1           | 0.932449643 |             |
| 1.006657426 | 0.74660457                                                                              | 0.896435753 | 0.899648056 | 1           | 1.000928492 |             |
| 0.937210435 | 0.807730587                                                                             | 0.702039175 | 0.926611569 | 1           | 0.94746411  |             |
| 0.985986769 | 0.904962137                                                                             | 0.983296954 | 1.552223276 | 0.912400256 |             |             |
| YHR171W     | YHR171W::APG7::autophagy                                                                |             |             |             |             |             |
| 1           |                                                                                         |             |             |             |             |             |
| 1.124807198 | 1.274646004                                                                             | 1           | 1.23039696  | 1.302054136 | 1.425265727 |             |
| 0.944720096 | 1                                                                                       | 1.565633174 | 1.650437344 | 1.22495316  | 1.207525075 | 1           |
| 1.537968381 | 0.767746187                                                                             | 1.229730517 | 1.247532738 | 1           | 3.12844143  |             |
| 2.510943374 | 3.344222686                                                                             | 2.60785464  | 1           | 1.049297309 | 0.964496883 |             |
| 1.074115894 | 1.191338406                                                                             | 0.983589913 | 1           | 0.907621875 | 0.683684598 |             |
| 0.988171475 | 0.846914875                                                                             | 0.510641841 | 1           |             | 0.754622233 | 1.018083176 |
| 0.783968561 | 0.908925396                                                                             | 1.872084122 |             |             |             |             |
| YLR255C     | YLR255C::YLR255C::molecular_function unknown                                            |             |             |             |             |             |
| 1           |                                                                                         |             |             |             |             |             |
| 1.563647471 | 1.68108047                                                                              | 1.351504879 | 1           | 1.658753362 | 1.687587534 |             |
| 1.934449139 | 1.604660712                                                                             | 1           | 1.330091836 | 1.439608411 | 1.452100987 |             |
| 1.401426167 | 1                                                                                       | 0.580622817 | 1.729152786 | 1.219631541 | 0.903439147 | 1           |
| 0.512767711 | 1.032583776                                                                             |             | 0.347227427 | 1           | 1.001907012 | 1.153498304 |
| 1.15429118  | 1.714266656                                                                             | 1.434729058 | 1           | 0.807125742 | 0.495337082 |             |
| 0.636975571 | 0.987818743                                                                             | 0.570034215 | 1           | 0.741208898 | 0.504719333 |             |
| 0.897982583 | 0.486147431                                                                             | 0.83399398  | 0.415045782 |             |             |             |
| YLR257W     | YLR257W::YLR257W::molecular_function unknown                                            |             |             |             |             |             |
| 1           |                                                                                         |             |             |             |             |             |
| 0.881772984 | 0.802012452                                                                             | 1.058940302 | 1           | 0.983474223 | 0.897661491 |             |
| 0.922995919 | 0.844689796                                                                             | 1           | 0.539979081 | 0.915996141 | 1.175186281 |             |
| 0.911726555 | 1                                                                                       | 1.672478073 | 1.035746391 | 1.741565899 | 1.984891761 | 1           |
| 1.710733523 | 1.331450639                                                                             | 3.08295519  | 1.488687518 | 1           | 0.701815049 |             |
| 0.647326958 | 0.468150146                                                                             | 0.846973736 | 1.046930091 | 1           | 0.777796301 |             |
| 0.558934048 | 0.522796306                                                                             | 0.714518276 | 1.81638988  | 1           | 1.160164871 |             |
| 0.78924214  | 1.391206585                                                                             | 1.5947997   | 2.671907444 | 1.266152286 |             |             |
| YHR173C     | YHR173C::YHR173C::molecular_function unknown                                            |             |             |             |             |             |
| 1           |                                                                                         |             |             |             |             |             |
| 1.294690245 | 1.054615899                                                                             | 1.643337042 | 1           | 1.085860352 | 0.978934555 |             |
| 1.38731371  | 1.530345963                                                                             | 1           | 0.839311103 | 0.978321095 | 1.27930579  |             |
| 1.486728314 | 1                                                                                       | 0.933734572 | 0.9861596   | 1.33252     | 0.954506942 | 1           |
| 0.969984933 | 0.963684789                                                                             | 0.497195652 | 0.417749971 | 1           | 1.12178361  |             |
| 1.209916996 | 1.317281567                                                                             | 1.29419412  | 1.090069309 | 1           | 1.058869363 |             |
| 1.093916825 |                                                                                         | 1.062951214 | 0.668333857 | 1           | 1.200068786 | 0.906726434 |
| 1.067971109 | 0.994301621                                                                             | 0.992313079 | 0.799444701 |             |             |             |
| YHR175W     | YHR175W::CTR2::Putative low-affinity copper transport protein                           |             |             |             |             |             |
| 1           |                                                                                         |             |             |             |             |             |
| 1.51415232  | 1.145081628                                                                             | 0.819469208 | 1.082557691 | 1           | 1.098791909 |             |
| 1.12775612  | 1.093022317                                                                             | 1.125935894 | 1           | 1.572242683 | 1.376852904 |             |
| 1.184646986 | 1.082579808                                                                             | 1           | 1.330826677 | 0.918882104 | 0.830811208 | 1           |



1.129749912 1 2.021025701 1.082941156 1.311823168 1.170015949 1  
0.902889089 0.729004205 0.546158859 0.620222351 1.136397581 1  
1.079467885 1.109640895 0.680702552 1.392038177 1.910893929 1  
0.841693513 0.810689526 0.9052624 1.265937257 0.870309414 0.689116088  
YHR189W YHR189W::YHR189W::not yet annotated 1 0.867382193  
1.094000555 0.451898792 1 1.315798607 1.442804407 0.791116989  
0.676384652 1 1.681276183 0.62619398 1.075737589 1  
1.801938943 1.643086237 0.728795673 1 1.26242809  
1 0.939566251 0.994740811 0.777724526 0.919519034 0.991646005 1  
1.697601521 0.669107574 1.448944806 1 0.813220757 1.140308952  
0.83436711 1.381807078 1.134950648 2.914076732  
YHR191C YHR191C::CTF8::(putative) kinetochore protein 1 1.105951096  
1.328361941 0.843359477 1.27079394 1 0.861049639 0.950085074  
1.470515555 1.292796074 1 0.823306441 1.284518578 1.895057537  
1.029906251 1 1.205883942 0.821584036 0.943669439 1.371196552 1  
1.612023433 2.800976975 2.335968381 1.119300744 1 1.303956271  
1.138430054 1.108718147 1.02146907 1.342447637 1 1.066522907  
1.250925491 0.803923999 0.997769486 1.314513547 1 1.278991085  
1.209772434 1.310457998 1.356145342 1.268945125 0.751285375  
YDR079w YDR079w::PET100::cytochrome c oxidase-specific assembly factor 1  
1.178194194 1.743539897 1.337896704 2.273532316 1 1.102161158  
1.283948722 2.535694347 1.969590459 1 1.101679347 1.497191064  
2.252473326 1.63218313 1 1.356623935 1.085315538 0.965079848  
1.46639421 1 1.848260743 1.735685071 2.126698666 1.132662103 1  
0.909013965 0.913554212 0.597559334 0.862544037 1.059190557 1 1.062469  
1.155312456 0.923041614 1.174785115 2.035543207 1 1.020511668  
0.954173527 0.965692934 1.492481236 1.970622093 1.277535408  
YDR081C "YDR081C::PDC2::Regulates transcription of PDC1 and PDC5, which  
encode pyruvate decarboxylase" 1 0.950823101 0.976312081 1.316254802  
0.920459038 1 1.143582333 1.173508778 1.15446062 0.99950165 1  
1.001129896 1.097026306 0.698501761 1.254717816 1 0.661081894  
0.708573363 0.650797072 1 0.549805093 0.694696148 0.622521026  
0.415367009 1 0.811072545 0.800407447 0.802174521 0.90538945  
0.889889741 1 0.904848812 0.801564335 1.073718075 0.875051567 1  
0.952192927 0.898292557 1.039366523 0.805009858 0.889125198 0.856360259  
YDR083w YDR083w::RRP8 1 0.781807692 0.758233937 0.667033166  
0.95186383 1 0.663319917 0.588965454 0.983028818 0.941347243 1  
0.511723176 0.389469479 0.568906952 0.750497563 1 0.448304548  
0.328853794 0.405289647 0.663663244 1 0.537611956 1.371669418  
0.75181428 0.647718841 1 0.738759162 0.706797967 0.580341202  
0.755114808 0.925841154 1 0.85063169 0.727799744 0.455314264  
0.909144879 1.396155347 1 0.653115302 0.609663389 0.796757537  
1.183676113 0.599594487 0.990330781  
YDR085C YDR085C::AFR1::coordinates regulation of alpha-factor receptor  
signalling and induction of morphogenesis during conjugation 1  
0.797347803 1.181324106 1.133980281 1.050016446 1 1.136423015  
1.191369973 1.425141836 0.917160406 1 0.93129586 1.53287878  
1.841811306 1.12102628 1 1.927066555 3.028121945 2.723449443 1  
1.337206016 2.509705524 2.201876842 1.643056674 1 1.081880591  
1.201641409 1.100871507 0.964247559 0.984808562 1  
1.915568669 1 0.904039601 0.884394679 0.783256129 1.646489725  
0.92816139  
YLR259C YLR259C::HSP60::60 kDa heat shock protein 1 0.932586518  
1.029896853 0.906323656 0.602212467 1 1.003132954 1.295533658  
0.874093377 0.754438666 1 1.008334519 1.103714714 1.177368046  
0.526468431 1 2.446853424 2.009773179 2.903468278 1.74842732 1  
1.517230153 1.042021769 1.017493295 1.464603526 1 1.090576196

|             |                                                                                                                          |             |             |             |             |
|-------------|--------------------------------------------------------------------------------------------------------------------------|-------------|-------------|-------------|-------------|
| 1.248111925 | 1.339361244                                                                                                              | 0.938099394 | 0.853593904 | 1           | 1.747603276 |
| 1.543707002 | 1.026115598                                                                                                              | 0.656409823 | 0.548172153 | 1           | 1.201419789 |
| 1.217621832 | 0.593290786                                                                                                              | 0.595100599 | 1.023569913 | 1.089276219 |             |
| YDR087c     | YDR087c::RRP1::involved in processing rRNA precursor species to mature rRNAs                                             | 1           | 0.779894547 | 0.761301926 | 0.734683308 |
|             |                                                                                                                          |             |             | 1.058613219 | 1           |
|             |                                                                                                                          | 0.619965632 | 0.552379197 | 1.042477048 | 1.094932842 |
|             |                                                                                                                          | 1           |             | 0.456346729 |             |
|             |                                                                                                                          | 0.383408375 | 0.431615579 | 0.927893021 | 1           |
|             |                                                                                                                          |             |             | 0.387211406 |             |
|             |                                                                                                                          | 0.755025209 | 1           | 0.742748982 | 0.85470776  |
|             |                                                                                                                          |             |             | 1.458165019 | 1           |
|             |                                                                                                                          | 0.872114283 | 0.726951969 | 0.695087869 | 0.85169835  |
|             |                                                                                                                          |             |             | 0.868079773 | 1           |
|             |                                                                                                                          | 0.892979759 | 0.845762474 | 0.535065708 | 1.101932584 |
|             |                                                                                                                          |             |             | 2.086588862 | 1           |
|             |                                                                                                                          | 0.740152506 | 0.684371257 | 0.862374013 | 1.054802374 |
|             |                                                                                                                          |             |             | 0.565293368 | 0.981574549 |
| YLL052C     | YLL052C::AQY2::aquaporin water channel in yeast                                                                          | 1           |             |             | 1.013021208 |
|             |                                                                                                                          | 0.942347216 | 1.14806357  | 0.856524935 | 1           |
|             |                                                                                                                          |             |             | 1.132827168 | 1.189266589 |
|             |                                                                                                                          | 0.924137992 | 1.033497554 | 1           | 1.118906428 |
|             |                                                                                                                          |             |             | 0.942486712 | 0.786211931 |
|             |                                                                                                                          | 0.972668091 | 1           | 0.939755759 | 0.607889598 |
|             |                                                                                                                          |             |             | 0.879431041 | 0.969386626 |
|             |                                                                                                                          | 1.22920631  | 1.550182121 | 1.311982113 | 0.933970789 |
|             |                                                                                                                          |             |             | 1           | 1.086165988 |
|             |                                                                                                                          | 0.963477344 | 1.026872118 | 1.00386994  | 0.873377893 |
|             |                                                                                                                          |             |             | 1           | 0.981232543 |
|             |                                                                                                                          | 0.666376243 | 0.576828144 | 0.616745987 | 0.536080104 |
|             |                                                                                                                          |             |             | 1           | 1.345136419 |
|             |                                                                                                                          | 0.867340282 | 1.169840738 | 0.975689796 | 0.996563869 |
|             |                                                                                                                          |             |             | 1.005216354 |             |
| YDR089w     | YDR089w::YDR089W::molecular_function unknown                                                                             | 1           |             |             | 2.899773234 |
|             |                                                                                                                          | 2.618597379 | 2.757824319 | 2.518113458 | 1           |
|             |                                                                                                                          |             |             | 2.740132198 | 2.693789641 |
|             |                                                                                                                          | 2.637240401 | 2.459259292 | 1           | 2.470170628 |
|             |                                                                                                                          |             |             | 2.382058297 | 2.192540025 |
|             |                                                                                                                          | 2.311043024 | 1           | 1.370651949 |             |
|             |                                                                                                                          |             |             | 0.951624599 |             |
|             |                                                                                                                          | 1           | 1.128341387 | 1.172414776 | 1.449735269 |
|             |                                                                                                                          |             |             | 0.894524085 | 1.185599676 |
|             |                                                                                                                          | 0.762808867 | 1.170157409 |             | 0.810868402 |
|             |                                                                                                                          |             |             | 1.551983096 | 1           |
|             |                                                                                                                          | 0.967941113 | 0.98201188  | 1.33030763  | 0.928204994 |
|             |                                                                                                                          |             |             | 2.610235097 |             |
| YLL054C     | YLL054C::YLL054C::molecular_function unknown                                                                             | 1           |             |             | 0.750172174 |
|             |                                                                                                                          | 0.857538916 | 1.09098338  | 0.678110134 | 1           |
|             |                                                                                                                          |             |             | 0.969400888 | 1.024250231 |
|             |                                                                                                                          | 0.756732893 | 1           | 1.047934134 | 0.81064969  |
|             |                                                                                                                          |             |             | 0.415164267 | 0.805727972 |
|             |                                                                                                                          | 0.992815833 | 0.64788207  |             | 0.835484145 |
|             |                                                                                                                          |             |             | 1           | 1.724062184 |
|             |                                                                                                                          | 1.083396205 | 1.350444851 | 1           | 1.158936333 |
|             |                                                                                                                          |             |             | 1.107774227 | 1.19882221  |
|             |                                                                                                                          | 0.971960748 | 1.012856844 | 1           | 1.45438364  |
|             |                                                                                                                          |             |             | 0.860937091 | 0.772804692 |
|             |                                                                                                                          | 0.931522655 | 0.52259188  | 1           | 1.411749934 |
|             |                                                                                                                          |             |             | 1.056642271 | 0.996327922 |
|             |                                                                                                                          | 0.742025249 | 1.05350876  | 0.760041607 |             |
| YDR103W     | YDR103W::STE5::Protein of the pheromone pathway                                                                          | 1           |             |             | 1.01399326  |
|             |                                                                                                                          | 0.912084405 | 1.157633884 | 0.878671327 | 1           |
|             |                                                                                                                          |             |             | 1.150169449 | 1.081837861 |
|             |                                                                                                                          | 0.969912558 | 0.845846859 | 1           | 1.017656407 |
|             |                                                                                                                          |             |             | 1.063534521 | 0.672797755 |
|             |                                                                                                                          | 1.008529906 | 1           | 1.034302625 | 1.002917851 |
|             |                                                                                                                          |             |             | 0.837094278 | 0.807372526 |
|             |                                                                                                                          | 0.95471126  | 1.311125744 |             | 1.107054392 |
|             |                                                                                                                          |             |             | 1           | 1.129881203 |
|             |                                                                                                                          | 1.089897028 | 0.985242947 | 1.01525271  | 1           |
|             |                                                                                                                          |             |             | 0.885868411 | 0.832360559 |
|             |                                                                                                                          | 0.872496772 | 1.266638763 | 1           | 1.063262394 |
|             |                                                                                                                          |             |             | 1.134438738 | 1.241068194 |
|             |                                                                                                                          | 1.079389006 | 1.24234992  | 0.805574095 |             |
| YHR193C     | "YHR193C::EGD2::GAL4 enhancer protein, homolog of human alpha NAC subunit of the nascent-polypeptide-associated complex" | 1           |             |             | 1.031715986 |
|             |                                                                                                                          | 1.228916952 | 0.824539868 | 1.489320286 | 1           |
|             |                                                                                                                          |             |             | 0.89737427  | 0.883096993 |
|             |                                                                                                                          | 1.364891742 | 1.262339881 | 1           | 0.907228337 |
|             |                                                                                                                          |             |             | 1.011181611 | 1.048157351 |
|             |                                                                                                                          | 1.092108578 | 1           | 0.960472726 | 0.60994716  |
|             |                                                                                                                          |             |             | 0.51761538  | 0.814859572 |
|             |                                                                                                                          | 1.353865604 | 1.175770469 | 0.971538002 | 1.132067982 |
|             |                                                                                                                          |             |             | 1           | 0.996646686 |
|             |                                                                                                                          | 1.066081954 | 1.324775448 | 1.24216227  |             |
|             |                                                                                                                          |             |             | 1           | 1.21133012  |
|             |                                                                                                                          | 1.284559792 | 0.794194476 |             | 1.202682068 |
|             |                                                                                                                          |             |             | 0.829411285 | 0.744608157 |
|             |                                                                                                                          | 0.972809956 | 0.598220257 | 1.004340689 |             |
| YLL056C     | YLL056C::YLL056C::molecular_function unknown                                                                             | 1           |             |             | 1.269282187 |
|             |                                                                                                                          | 0.898697028 | 1.038320184 | 1           | 0.97711334  |
|             |                                                                                                                          |             |             | 1.022075842 | 1.113333575 |
|             |                                                                                                                          | 1.23486013  | 1.126507011 | 1.444262575 | 1.329767751 |
|             |                                                                                                                          |             |             | 1           |             |
|             |                                                                                                                          | 2.041020693 | 2.097758251 | 1           | 1.149006739 |
|             |                                                                                                                          |             |             | 2.13152656  | 1.164972589 |
|             |                                                                                                                          | 1.04074154  | 1           | 1.3816421   | 1.38322282  |
|             |                                                                                                                          |             |             | 1.422510051 | 1.2571727   |
|             |                                                                                                                          | 1.07126212  | 1           | 1.268227259 | 1.300934228 |
|             |                                                                                                                          |             |             | 0.918180619 | 0.639173893 |

|         |                                                                |             |             |             |             |             |   |
|---------|----------------------------------------------------------------|-------------|-------------|-------------|-------------|-------------|---|
|         | 0.894433001                                                    | 1           | 1.454945454 | 1.543231557 | 1.04833244  |             |   |
|         | 1.154948061                                                    |             |             |             |             |             |   |
| YDR105C | YDR105C::YDR105C::molecular_function unknown                   |             |             |             | 1           | 1.211722704 |   |
|         | 0.970995277                                                    | 1.104767732 | 0.833741961 | 1           | 1.193866195 | 1.089551061 |   |
|         | 0.933419293                                                    | 0.900827499 | 1           | 1.329609376 | 1.157143885 | 0.924126223 |   |
|         | 1.003776662                                                    | 1           | 1.387765714 | 1.074086954 | 1.254933563 | 1.029525674 | 1 |
|         | 1.358842662                                                    | 1.141697903 | 0.892068269 | 1.069163224 | 1           | 1.257978882 |   |
|         | 1.44073274                                                     | 1.713623578 | 1.352063419 | 1.10325509  | 1           | 0.985907457 |   |
|         | 1.046978952                                                    | 1.121480964 | 0.864613963 | 0.86298455  | 1           | 1.255662855 |   |
|         | 1.243342698                                                    | 1.036024317 | 0.937635031 | 1.102719142 | 0.970191427 |             |   |
| YHR195W | YHR195W::NVJ1::Vac8p binding protein; nucleus-vacuole junction |             |             |             | 1           |             | 1 |
|         | 1.011372292                                                    | 1.34533658  | 1.080749267 | 1.255859395 | 1           | 1.101649674 |   |
|         | 1.081090332                                                    | 1.440162456 | 1.118624629 | 1           | 1.360238853 | 1.572832797 |   |
|         | 1.795588337                                                    | 1.344848415 | 1           | 1.463329651 |             | 1.446574517 | 1 |
|         | 2.347018546                                                    | 1.431924711 | 1.926147652 | 1.271154387 | 1           | 1.119321154 |   |
|         | 1.34978228                                                     | 1.386560176 | 1.14357798  | 1.076357395 | 1           | 0.923606634 |   |
|         | 1.014366898                                                    | 0.93804142  | 1.011326365 | 1           | 1.24144811  | 1.190028789 |   |
|         | 1.365471761                                                    | 1.051880059 | 1.072819647 |             |             |             |   |
| YLL058W | YLL058W::YLL058W::molecular_function unknown                   |             |             |             | 1           | 1.164968321 |   |
|         | 1.198284434                                                    | 1.081883191 | 0.979737955 | 1           | 1.17275993  | 1.175744649 |   |
|         | 1.202504872                                                    | 1.229378223 | 1           | 1.476573634 | 1.592355051 | 1.228333697 |   |
|         | 0.954582189                                                    | 1           | 1.020177145 | 1.343631967 | 1.44933986  | 0.860840317 | 1 |
|         | 0.66594386                                                     | 0.814795065 | 0.655093748 | 0.489719003 | 1           | 1.217707742 |   |
|         | 1.386869487                                                    | 1.581148208 | 1.28720247  | 0.911856521 | 1           | 1.077778526 |   |
|         | 0.979843956                                                    | 1.286577911 | 1.189333399 | 0.430136003 | 1           | 0.809417631 |   |
|         | 0.70520886                                                     | 0.849983995 | 0.490379091 | 0.776721404 | 0.528876872 |             |   |
| YDR107C | YDR107C::YDR107C::molecular_function unknown                   |             |             |             | 1           | 1.997887641 |   |
|         | 1.862804                                                       | 1.816228472 | 1           | 1.658800223 | 1.888685028 | 1           |   |
|         | 1.545041079                                                    | 1.83094768  | 2.269349606 | 1.83363688  |             |             |   |
|         | 0.749537978                                                    |             |             | 0.562048299 |             | 0.877629702 |   |
|         | 0.73171881                                                     | 0.892117874 |             | 1           |             |             | 1 |
|         | 0.842392499                                                    | 0.656676233 | 0.83443188  | 1.241387634 |             | 1.91586528  |   |
| YHR197W | YHR197W::YHR197W::molecular_function unknown                   |             |             |             |             | 1.310089381 |   |
|         | 0.843864134                                                    | 1.535214487 | 1.138540935 |             | 1.296689664 | 1.096185264 |   |
|         | 1.135507851                                                    | 1.346821277 |             | 0.747491846 | 0.496069285 | 0.354075502 |   |
|         | 1.446945786                                                    | 1           | 0.262204506 | 0.339244804 | 0.354518463 | 0.322193744 | 1 |
|         | 0.438217476                                                    | 0.270379289 | 0.716173424 | 1           | 1.111065858 | 0.983897318 |   |
|         | 1.049395033                                                    | 1.194303804 | 1.382827826 | 1           | 1.030664942 | 0.866677539 |   |
|         | 1.006314831                                                    | 0.919640649 |             | 1           | 0.79073081  | 0.860948878 |   |
|         | 0.806345362                                                    | 0.745079566 | 1.036738829 |             |             |             |   |
| YLL060C | YLL060C::GTT2::Glutathione Transferase                         |             |             |             | 1           | 1.256537624 |   |
|         | 1.029206172                                                    | 1.557335157 | 1           | 0.884637454 |             | 1.394597782 | 1 |
|         | 3.784552539                                                    | 6.629894329 | 4.615209533 | 2.551535423 | 1           | 1.487901765 |   |
|         |                                                                |             |             | 1           | 3.32557609  | 9.653267896 |   |
|         | 15.06029658                                                    | 2.743638246 | 1.308577084 | 1           | 4.845194682 | 22.12440011 |   |
|         | 35.01459289                                                    | 46.73160065 | 9.663763397 | 1           | 6.822873443 | 16.99606343 |   |
|         | 18.4211147                                                     | 2.314004516 | 2.047427418 | 3.646973927 |             |             |   |
| YDR109C | YDR109C::YDR109C::molecular_function unknown                   |             |             |             | 1           | 1.019991937 |   |
|         | 0.986765403                                                    | 1.276426007 | 0.9259385   | 1           | 1.109277396 | 1.139982288 |   |
|         | 1.108821141                                                    | 1.164043145 | 1           | 1.054862793 | 1.157086233 | 1.06941198  |   |
|         | 1.244967385                                                    | 1           | 1.207669952 | 0.771949954 | 1.14202054  | 1.053890473 | 1 |
|         | 1.289540594                                                    | 1.139357432 | 0.876455681 | 0.951026564 | 1           | 1.021134615 |   |
|         | 0.73029294                                                     | 0.778902343 | 0.892053927 | 1.041923228 | 1           | 1.114627551 |   |
|         | 1.140731237                                                    | 1.028286163 | 1.073887369 | 1.06023283  | 1           | 0.925050468 |   |
|         | 1.342743412                                                    | 1.141367445 | 1.166686459 | 1.312008491 | 1.112042463 |             |   |
| YHR199C | YHR199C::YHR199C::molecular_function unknown                   |             |             |             | 1           | 1.312844993 |   |
|         | 1.125895977                                                    | 0.727471034 | 0.642347048 | 1           | 1.127210276 | 1.032353263 |   |

|             |                                                                                                |             |             |             |             |   |             |
|-------------|------------------------------------------------------------------------------------------------|-------------|-------------|-------------|-------------|---|-------------|
| 1.004487449 | 0.854180928                                                                                    | 1           | 3.177647371 | 3.432571825 | 2.120220341 |   |             |
| 0.962455202 | 1                                                                                              | 2.70126356  | 2.981080501 | 2.091465486 | 1.571628761 | 1 |             |
| 3.018578017 | 3.667820377                                                                                    | 2.517035922 | 1.602010755 | 1           | 1.193878459 |   |             |
| 0.953910354 | 1.16345472                                                                                     | 1.210525715 | 1.4162302   | 1           | 0.836592449 |   |             |
| 0.922492634 | 0.932813205                                                                                    | 0.683979616 | 1           | 0.758322654 | 0.769628064 |   |             |
| 0.715324199 | 0.744609917                                                                                    |             |             |             |             |   |             |
| YLL062C     | YLL062C::MHT1::S-Methylmethionine Homocysteine methylTransferase                               |             |             |             |             | 1 |             |
| 1.527240973 | 1.954439745                                                                                    | 1.034023937 | 1.017883725 | 1           | 1.183323997 |   |             |
| 1.367764983 | 1.351716645                                                                                    | 1.136716008 | 1           | 1.347942116 | 1.275053486 |   |             |
| 0.743669036 | 1                                                                                              | 1.977949307 | 1.262411509 | 1.384232666 | 1.590332481 | 1 |             |
| 1.339093769 | 0.800219077                                                                                    | 0.843067146 | 0.692062776 | 1           | 0.908721802 |   |             |
| 0.779641938 | 0.599848171                                                                                    | 0.864582464 | 0.749376721 | 1           | 2.398252626 |   |             |
| 1.606392066 | 0.319083654                                                                                    | 0.866439689 | 2.489013882 | 1           | 2.46471839  |   |             |
| 1.570612626 | 0.758174487                                                                                    | 1.497293886 | 1.275907522 | 1.143564939 |             |   |             |
| YHR213W     | YHR213W::YHR213W::molecular_function unknown                                                   |             |             |             |             | 1 | 0.920640942 |
| 0.770499994 | 1.282193906                                                                                    | 0.703109574 | 1           | 1.197223305 | 1.314789485 |   |             |
| 0.790717783 | 0.799607936                                                                                    | 1           | 1.167085607 | 0.90646314  | 0.721700452 |   |             |
| 0.890793503 | 0.938161743                                                                                    |             | 1.721449626 |             |             |   |             |
| 1           | 0.924467605                                                                                    | 1.199732532 | 1.422027761 | 1.185889592 | 1           |   |             |
| 0.564370034 | 0.444738992                                                                                    | 0.583062214 | 0.732102659 | 0.34051542  | 1           |   |             |
| 0.397336765 | 0.984673062                                                                                    | 0.13849323  | 1.024064947 | 0.602429332 |             |   |             |
| YLR009W     | YLR009W::RLP24::Ribosomal Like Protein 24                                                      |             |             |             |             | 1 | 0.896389963 |
| 0.895397318 | 0.827676695                                                                                    | 1.392293621 | 1           | 0.680117211 | 0.699550523 |   |             |
| 1.203571242 | 1.326848285                                                                                    | 1           | 0.501711994 | 0.399421603 | 0.525805063 |   |             |
| 1.018032006 | 1                                                                                              | 0.328851224 | 0.316600576 | 0.263524179 | 0.745405908 | 1 |             |
| 0.434921843 | 0.48306901                                                                                     | 0.465972369 | 0.679301182 | 1           | 0.715037663 |   |             |
| 0.518319876 | 0.486043509                                                                                    | 0.740076884 | 0.85553346  | 1           | 0.752757798 |   |             |
| 0.908694851 | 0.443010959                                                                                    | 1.043338287 | 1.746335505 | 1           | 0.618175868 |   |             |
| 0.848388105 | 0.832154884                                                                                    | 1.356158351 | 0.62752767  | 1.161077402 |             |   |             |
| YLR011W     | YLR011W::LOT6::LOw Temperature responsive                                                      |             |             |             |             | 1 | 1.024939513 |
| 1.429001601 | 1.184602876                                                                                    | 1.513975289 | 1           | 1.084454022 | 1.305721979 |   |             |
| 1.463889877 | 1.56497227                                                                                     | 1           | 1.118042295 | 1.503326651 | 1.633542815 |   |             |
| 1.575967335 | 1                                                                                              | 1.380260469 | 0.94582864  | 1.492381965 | 1.688489144 | 1 |             |
| 1.216373874 | 1.730429792                                                                                    | 2.066559407 | 0.930971434 | 1           | 1.115567399 |   |             |
| 1.203625509 | 1.152581266                                                                                    | 0.877870041 | 1.034148179 | 1           | 0.962871294 |   |             |
| 1.574833524 | 1.448527231                                                                                    | 1.740084709 | 1.758200213 | 1           | 1.347599859 |   |             |
| 1.33930448  | 1.300710687                                                                                    | 0.9121134   | 1.673963156 | 0.969315762 |             |   |             |
| YHR215W     | "YHR215W::PHO12::acid phosphotase, nearly identical to Pho11p"                                 |             |             |             |             | 1 |             |
| 0.999205899 | 0.727836093                                                                                    | 0.756303462 | 0.475907651 | 1           | 0.786017652 |   |             |
| 0.800937129 | 0.785078872                                                                                    | 0.622535516 | 1           | 0.831394526 | 0.662860945 |   |             |
| 0.380230273 | 0.490362145                                                                                    | 1           | 0.593317831 | 0.586469454 | 0.55689357  |   |             |
| 0.562505672 | 1                                                                                              | 0.564929038 | 0.593277758 | 0.681985405 | 0.739973536 | 1 |             |
| 1.011973193 | 1.116197993                                                                                    | 1.287157762 | 2.038890055 | 1.036530494 | 1           |   |             |
| 0.821930004 | 0.846742795                                                                                    | 0.965321307 | 1.673441427 | 1.187545307 | 1           |   |             |
| 0.821413725 | 0.650305777                                                                                    | 1.28801544  | 0.835421964 | 0.398100235 | 0.997335787 |   |             |
| YLR013W     | YLR013W::GAT3::The amino acid sequence of this ORF is very homologous to that of GAT4/YIR013C. |             |             |             |             |   |             |
| 1.215006654 |                                                                                                |             |             | 1           | 0.735286194 |   |             |
| 0.602217062 | 0.461105414                                                                                    | 0.788257153 | 1           | 1.017237308 | 1.121121374 |   |             |
| 0.485031136 | 0.416302537                                                                                    |             | 0.994038322 | 0.813634487 | 1.202248209 |   |             |
| 0.715740281 |                                                                                                |             |             |             | 0.781789373 |   |             |
| 0.90401308  | 0.556477892                                                                                    |             |             |             |             |   |             |
| YHR217C     | YHR217C::YHR217C::molecular_function unknown                                                   |             |             |             |             | 1 | 1.144216959 |
| 1.145842989 | 0.859667768                                                                                    | 0.85083739  | 1           | 1.274856879 | 1.107605268 |   |             |
| 1.067408493 | 1.025775346                                                                                    | 1           | 1.336659808 | 1.145562506 | 1.645823959 |   |             |
| 0.89339755  | 1                                                                                              | 0.784255354 | 0.915795622 | 1.288751055 | 0.795104094 | 1 |             |
| 0.747286706 | 1.140397943                                                                                    | 1.173448176 | 0.825844628 | 1           |             |   |             |

0.869574533 0.935551636 0.993930187 1 0.71904064 0.646328061  
 1 0.805698496 0.817832829  
 YHR219W YHR219W::YHR219W::molecular\_function unknown 1 0.70143864  
 0.707334815 0.82553195 0.477389765 1 0.841860555 0.972556093  
 0.687527348 0.750214943 1 0.899542596 0.835319549 0.643644342  
 0.781430942 1 1.091927651 1.249208373 1.342823458 0.819828724 1  
 0.716444775 0.396365163 0.397389878 0.902294509 1 0.846187668  
 0.988410036 1.423790934 1.13798587 1.094349699 1 0.975167794  
 0.785735292 1.104017658 1.108120257 0.710339781 1 0.824187557  
 0.879100098 1.24579667 0.922328521 1.028180283 0.760917271  
 YIL002C YIL002C::INP51::Synaptojanin-like protein 1 1.043337322  
 1.022308952 1.15970863 0.932199483 1 0.984016427 1.128843052  
 0.975439912 0.797816254 1 0.944472744 1.152495185 0.838230445  
 1.126259621 0.922339553 0.569277654  
 1 0.919141525 1.03073944 1.001769041 0.922395693 1.020019195 1  
 0.837518171 0.798812063 0.838584118 0.809204015 0.955070238 1  
 0.988370494 0.928428472 0.975375849 1.006444824 1.06313321 1.056878183  
 YIL004C YIL004C::BET1::Type II membrane protein required for vesicular  
 transport between the endoplasmic reticulum and Golgi complex; v-SNARE with  
 similarity to synaptobrevins 1 0.9836671 1.113479527 0.934489184  
 1.438964179 1 0.885873555 0.869155834 1.35438581 1.305473489 1  
 0.827255872 0.994053926 1.495975608 1.118509822 1 0.825610288  
 0.693537324 0.735087723 1.229653632 1 2.038511022 3.124272112  
 2.372740407 1.352828173 1 0.836914112 0.975792005 0.687533229  
 0.785214857 0.772745861 1 1.128539078 1.464486442 1.041888436  
 1.069211531 1.742002639 1 0.948214866 1.305563241 0.995088872  
 1.312263198 1.271626805 1.468421488  
 YDR111C YDR111C::YDR111C::not yet annotated 1 1.018819574 0.846883281  
 1.043291969 0.683578785 1 1.153981563 1.009511824 0.939063547  
 0.867330109 1 1.077567257 0.858582592 0.635434738 0.876707708 1  
 0.600484385 0.468841039 0.6134995 0.462407674 1 0.933099088  
 0.675797914 0.556937709 0.450821796 1 0.83105384 0.667223854  
 0.673918789 1.160623191 0.8840493 1 0.771143725 0.488624544  
 0.45806951 0.443644392 1 0.739655902 0.553344565 0.541582885  
 0.459601645 0.741986366 0.736399802  
 YDR113C YDR113C::PDS1::May be an anaphase inhibitor that plays a critical  
 role in control of anaphase by both the anaphase promoting complex (APC) and  
 DNA-damage checkpoints 1 0.941049996 1.534004436 1.129974121 1.343542889 1  
 1.189719155 1.167174484 1.463475616 1.32291926 1 0.895421524  
 1.125305434 1.111199364 1.533733393 0.922339553 0.729544174  
 0.62617731 0.997091808 1 1.116927985 1.506503701 1.102257468  
 1.218855711 1.028276187 1.065824351 0.902221125 0.752374702  
 1.160685793 1 0.911648662 1.209232742 1.077919632 1.289282042  
 1.002443386 1 0.939986235 1.073309918 1.024440797 0.940501915  
 1.576026606 0.985077  
 YDR127W "YDR127W::ARO1::pentafunctional arom polypeptide (contains: 3-  
 dehydroquinase synthase, 3-dehydroquinase dehydratase (3-dehydroquinase),  
 shikimate 5-dehydrogenase, shikimate kinase, and epsp synthase)" 1  
 1.596277301 1.535233012 1.801617452 1.201201981 1 1.557895834  
 1.468308327 1.518802039 1.352261328 1 1.607786264 1.753773164  
 1.40742604 1.529983264 1 1.008685227 1  
 1 0.98800872 0.952964607 0.781256919 0.885756716  
 0.91683773 1 1.538219712 1.535344761 0.844183507 1.117949197  
 1.737151201 1 1.241394707 0.740448772 1.02150066 0.653166089  
 YDR127W "YDR127W::ARO1::pentafunctional arom polypeptide (contains: 3-  
 dehydroquinase synthase, 3-dehydroquinase dehydratase (3-dehydroquinase),  
 shikimate 5-dehydrogenase, shikimate kinase, and epsp synthase)"

1.161832179 1.21542993 1.200606898 1.182199313 1 1.046796252  
 1.216634806 0.776896981 1.112138621 1.305078367 1 1.011853463  
 1.032305898 0.97406586 1.279456628 0.968544814 1.075266311  
 YDR129C YDR129C::SAC6::fibrin homolog (actin-filament bundling protein) 1  
 0.953342969 0.981282105 1.244968638 0.725430469 1 1.282489221  
 1.28244145 0.97553595 1.004064725 1 0.993038582 1.267117387  
 1.115710633 0.937498578 1 1.933624896 2.050296229 1.928878521  
 1.695792629 1 1.081133657 0.764512564 0.764658658 1.053640029 1  
 0.995095413 1.003363232 1.204215209 1.00716728 0.869414225 1  
 1.059492916 0.900028642 0.843169918 0.787328863 0.513999556 1  
 1.207216704 1.0285993 0.850727593 0.77727609 1.079140399 0.687364863  
 YLR015W "YLR015W::BRE2::putative transcription factor, contains a PHD finger  
 motif; homology to <i>D. melanogaster</i> Ash2p trithorax transcription  
 factor<br>member of Set1p complex" 1 0.761945967 0.778053606  
 1.017590946 1 0.851482542 0.845034418 1.144921895 1  
 0.731955282 0.675765472 0.620526196 1.089654993 1 0.564207385  
 0.35367518 1.105319774 1 1.348224165 3.166892176 1.454110685  
 1.356299417 1 1.000353946 0.951760707 0.979047926 0.923554526  
 0.964058323 1 0.813007431 0.826858053 0.847136453 1.044716133  
 1.10917327 1 1.128349209 1.202868693 1.391426633 1.333869936  
 1.257141838 0.838847796  
 YDR131C YDR131C::YDR131C::molecular\_function unknown 1 0.826256501  
 0.927671363 0.970016171 0.899337907 1 0.886320347 0.941045785  
 1.246920611 1 0.981015882 1.082702461 1.011659887 1.199727218 1  
 0.850390641 0.82231615 1.510168634 1 1.588215914 4.349720165  
 2.33941467 1.658056117 1 1.107727044 1.38563256 1.132254566  
 0.808626891 1.024485143 1 1.270333683 1.284749958 1.253642779  
 1.343999873 1 1.382177944 1.321501709 1.157293663 1.365108551  
 1.096281225  
 YLR017W YLR017W::MEU1::Protein that regulates ADH2 gene expression 1  
 0.994648393 0.86090633 0.850889324 0.8456729 1 0.84237036  
 0.846871425 0.981694119 1.226776034 1 0.830759152 0.585545476  
 0.476876837 0.981590058 1 0.647991727 1  
 0.965770567 0.679107253 0.307369758 1 0.992688733 0.907273018  
 1.022416158 1.100930672 0.822588381 1 0.899389893 0.774806624  
 0.648594694 0.714599495 0.774317685 1 0.980095497 0.754550175  
 0.924159589 1.057408813 0.644193386 0.999962573  
 YDR133C YDR133C::YDR133C::molecular\_function unknown 0.929621679  
 1.114902791 0.954896653 1.189447368 1.006114932 0.868820171  
 0.969885351 0.9007719 0.927131001 1.067236393 0.992112507  
 0.863468326 0.672521201 1 2.082109737  
 1 1.072487738 1.048312083 1.051833892 1.088665061 0.930065408 1  
 1.251582328 0.814301044 1.20251821 1.144982098 1 0.784239962  
 0.789492141 0.968500038 0.954593321 1.554232579  
 YLR019W YLR019W::PSR2::Plasma membrane Sodium Response 2 1  
 0.715404386 0.822866221 0.80080757 0.703208536 1 0.930519665  
 0.956886878 0.683574719 0.634845624 1 0.67831444 0.788219187  
 0.705425943 0.64918212 1 0.74388272 0.469066163 0.901502873  
 0.830836305 1 0.945563661 1.048345047 1.052088207 0.842290148 1  
 0.882718038 0.988378477 1.026203128 1.224796974 1.033443642 1  
 0.674554171 0.462663037 0.589325032 0.664666155 0.516627288 1  
 0.731773127 0.522702785 0.950875834 0.690436026 0.960806567 0.757414768  
 YDR135C YDR135C::YCF1::Metal resistance protein with similarity to human  
 cystic fibrosis protein CFTR and multidrug resistance proteins 1  
 2.001666249 1.582633138 1.738794661 1.884312893 1 1.671320354

|             |                                                                                                                      |             |             |             |             |
|-------------|----------------------------------------------------------------------------------------------------------------------|-------------|-------------|-------------|-------------|
| 1.524397809 | 1.651795066                                                                                                          | 1.648229845 | 1           | 1.868121556 | 2.045712207 |
| 1.732528728 | 1.66063009                                                                                                           |             | 0.922339553 |             | 1.000592588 |
| 0.961668356 |                                                                                                                      | 1           | 1.037684507 | 1.201117659 | 1.170871106 |
| 1.018975608 | 0.857511569                                                                                                          | 1           | 0.97585693  | 0.825472663 | 0.709778408 |
| 0.943074221 | 0.669543384                                                                                                          | 1           | 1.143080428 | 1.100176501 | 1.235784582 |
| 0.973486957 |                                                                                                                      | 0.880002116 |             |             |             |
| YIL018W     | YIL018W::RPL2B::Homology to rat L8 and E. coli L2                                                                    |             |             |             | 1           |
| 1.258671598 | 0.993783213                                                                                                          | 0.787564718 | 0.922286483 | 1           | 1.058691242 |
| 0.942848001 | 0.954484988                                                                                                          | 1.052543472 | 1           | 0.901789737 | 0.773257036 |
| 0.686765466 | 0.762776166                                                                                                          | 1           | 0.858147715 | 0.408390532 | 0.300963541 |
| 0.473048218 | 1                                                                                                                    | 1.160131912 | 0.430998464 | 0.368574221 | 0.563755539 |
| 1.156548099 | 0.818962469                                                                                                          | 1.381678481 | 1.218828184 | 1.059444188 | 1           |
| 1.406100815 | 0.969454386                                                                                                          | 0.798480369 | 0.482725518 | 0.736429726 | 1           |
| 1.131705137 | 0.878402709                                                                                                          | 0.905825207 | 1.031416716 | 0.912753382 | 1.101535006 |
| YLR033W     | YLR033W::RSC58::Remodels the structure of chromatin complex 58KDa subunit                                            |             |             |             | 1           |
| 0.894012692 | 0.863969136                                                                                                          | 0.89675876  | 0.869896666 | 1           | 0.797892295 |
| 0.831147406 | 0.660772206                                                                                                          | 0.937829998 | 1           |             | 0.986846333 |
| 1.227230314 |                                                                                                                      | 0.945058152 | 1.233674508 | 1           | 0.947001904 |
| 1.023314527 | 0.869154697                                                                                                          | 1.051048455 | 1           | 1.05011457  | 0.822279425 |
| 0.800035038 | 0.840522815                                                                                                          | 0.991910357 | 1           | 1.234611201 | 1.032254594 |
| 1.079393227 | 1.085919616                                                                                                          | 1.293690318 | 0.824837783 |             |             |
| YDR137W     | "YDR137W::RGP1::Ric1p-Rgp1p is an exchange factor, and peripheral membrane protein complex restricted to the Golgi." |             |             |             | 1           |
| 0.997558443 | 1.184502589                                                                                                          | 1.117281155 | 1           | 1.04991958  | 1.151780122 |
| 1.19552524  | 1.028531682                                                                                                          | 1           | 0.923192199 | 1.105011087 | 0.680511185 |
| 1.229034368 | 1                                                                                                                    | 0.86041883  |             | 1.37335581  | 0.860736974 |
| 0.601010589 | 0.596385629                                                                                                          |             | 1           | 0.937777802 | 1.071265083 |
| 1.078020687 | 1.282136573                                                                                                          | 1.361957358 | 1           | 1.013348217 | 0.606896578 |
| 0.778614091 | 1.380217059                                                                                                          | 1.001062084 | 1           | 0.744613636 | 0.62772325  |
| 1.047646394 | 0.70197184                                                                                                           | 1.07045183  | 0.465831973 |             |             |
| YIL020C     | YIL020C::HIS6::phosphoribosyl-5-amino-1-phosphoribosyl-4-imidazolecarboxiamide isomerase                             |             |             |             | 1           |
| 1.372226628 | 1                                                                                                                    | 0.8098213   | 0.730661644 | 1.094483649 | 1.123113421 |
| 0.664299002 | 0.764500027                                                                                                          | 0.729298802 | 0.818522173 | 1           | 0.673934738 |
| 0.657300623 | 0.503147683                                                                                                          | 1.371034877 | 1           |             | 0.665185527 |
| 0.935349796 | 0.987216072                                                                                                          | 0.788972209 | 0.780768736 | 0.842945649 | 1           |
| 1.06141388  | 1.120006437                                                                                                          | 0.94156565  | 0.789474744 | 1.14362887  | 1           |
| 0.969862687 | 0.987858589                                                                                                          | 0.868372583 | 1.333157917 | 0.782471658 | 1.04199261  |
| YLR035C     | YLR035C::MLH2::Mutl Homolog                                                                                          |             |             |             | 1           |
| 0.933384326 |                                                                                                                      | 1           | 0.933291872 | 0.879187821 | 0.83486184  |
| 0.818068291 | 0.842882794                                                                                                          | 0.556886255 | 1.088341404 | 1           | 0.997527932 |
| 1.210342438 | 1.311168086                                                                                                          |             | 0.657754352 | 0.707832645 | 0.414198067 |
| 1.099994443 | 1.211057108                                                                                                          | 1.206202916 | 1.274618388 | 1.259045391 | 1           |
| 0.848760115 | 0.652152161                                                                                                          | 0.791046707 | 0.942851089 | 0.82872595  | 1           |
| 0.881491859 | 0.807617531                                                                                                          | 1.158681902 | 0.884551617 | 1.359225662 | 0.788061579 |
| YDR151C     | YDR151C::CTH1::RNA triphosphatase/NTPase                                                                             |             |             |             | 1           |
| 1.131624497 | 1.012587042                                                                                                          | 1.312471293 | 1           | 1.071716896 | 1.067845082 |
| 1.090295843 | 1.102089946                                                                                                          | 1           | 0.945461649 | 1.249880401 | 1.163695227 |
| 1.122143823 | 1                                                                                                                    |             | 0.597077293 | 1.138716151 | 1.73969927  |
| 0.895091746 | 1.016084498                                                                                                          | 1.449295118 | 1.526265046 | 1           | 0.956307313 |
| 0.769730808 | 0.583170853                                                                                                          | 0.959491983 | 0.957139657 | 1           | 0.750493599 |
| 0.552826351 | 0.420050949                                                                                                          | 0.49235006  | 1.456580232 | 1           | 0.865584541 |
| 0.622654723 | 0.783759608                                                                                                          | 0.943773215 | 1.176671481 | 1.158450512 |             |
| YIL022W     | YIL022W::TIM44::48.8 kDa protein involved in mitochondrial protein import                                            |             |             |             | 1           |
| 0.900049921 | 0.94280025                                                                                                           |             | 0.599814076 | 1           | 0.835432832 |
|             |                                                                                                                      |             |             |             | 0.791030811 |

|             |                                                                                       |             |             |             |             |
|-------------|---------------------------------------------------------------------------------------|-------------|-------------|-------------|-------------|
| 0.744819121 | 0.549583531                                                                           | 1           | 0.910224666 | 0.743615615 | 0.878166931 |
| 0.932411903 | 1                                                                                     | 0.81471937  | 0.839902032 | 0.855926941 | 0.901202964 |
| 1.02190393  | 1.02925382                                                                            | 1.186608908 | 1.045290399 | 0.99895839  | 1           |
| 0.924433749 | 0.723226791                                                                           | 0.757797257 | 0.682510718 | 0.581606505 | 1           |
| 0.873160068 | 0.592764277                                                                           | 0.778555497 | 0.578643887 | 0.76321287  | 1.044619396 |
| YLR037C     | YLR037C::DAN2::Delayed anaerobic gene                                                 | 1           |             | 1.094370827 |             |
| 1.204061291 | 0.943235195                                                                           | 1.284131727 | 1           | 1.006274792 | 0.96755022  |
| 1.296009231 | 1.087238477                                                                           | 1           | 1.047028854 | 1.10635342  | 1.760111321 |
| 1.10039058  | 1                                                                                     | 1.626335525 | 0.613480543 | 1.185733295 | 1.728921668 |
| 1.142908251 | 1.844015853                                                                           |             | 0.673154977 | 1           | 1.183492549 |
| 0.953997429 |                                                                                       | 1.088017925 | 1           | 0.761401178 | 1.172869218 |
| 1.01768467  | 1.194690515                                                                           | 1           | 0.87991255  | 1.37183519  | 1.153488474 |
| 1.542257119 | 1.447312951                                                                           | 1.059505073 |             |             |             |
| YDR153C     | YDR153C::YDR153C::molecular_function unknown                                          | 1           |             |             |             |
| 1           |                                                                                       |             | 1           |             |             |
|             | 1                                                                                     | 0.85702023  | 0.884755508 | 0.679392161 | 1.081463973 |
| 0.910962614 | 1.019150969                                                                           | 0.850167821 | 0.799377908 | 0.863598624 | 1           |
| 1.143440889 | 1.306913135                                                                           | 0.959911729 | 1.132489582 | 1.716969678 | 1           |
| 0.965596731 | 1.072873225                                                                           | 1.114246372 | 1.243162396 | 1.127786862 | 0.908022036 |
| YIL024C     | YIL024C::YIL024C::molecular_function unknown                                          | 1           |             | 0.958858369 |             |
| 1.232202223 | 0.96408728                                                                            | 1.257853865 | 1           | 0.963317084 | 0.96677653  |
| 1.184424499 | 1.132463517                                                                           | 1           | 0.918496971 | 0.851632365 | 1.516279686 |
| 0.947547473 | 1                                                                                     | 0.807114783 |             | 1.256227304 | 1.455092494 |
| 1.137404994 | 1.815973803                                                                           | 2.005610487 | 1.173198001 | 1           | 0.955574053 |
| 1.087533389 | 1.104253472                                                                           | 0.981671953 | 1.004893553 | 1           | 0.627140302 |
| 0.792716644 | 0.756324189                                                                           | 0.769076657 | 1.098724973 | 1           | 1.075591117 |
| 1.150155699 | 1.35225154                                                                            |             | 1.439186043 | 1.457038366 |             |
| YLR039c     | YLR039c::RIC1::involved in transcription of ribosomal protein genes and ribosomal RNA | 1           |             |             |             |
| 1           | 1.051113669                                                                           | 1.07982135  | 1.102056632 | 0.993799818 | 1           |
| 1.159927172 | 1.050132125                                                                           |             | 0.775905482 | 1           | 1.227457947 |
| 0.650089262 | 1.020810383                                                                           | 1           | 1.174959187 | 0.903135852 | 1.095662419 |
| 0.950896258 | 1.165628751                                                                           |             | 1.048656714 | 1           | 0.981556112 |
| 0.955634172 | 0.878899767                                                                           | 1.051894737 | 1           | 1.192455453 | 0.852348114 |
| 0.891466447 | 1.103002991                                                                           | 0.749179559 | 1           | 0.964082059 | 1.000048649 |
| 1.022199696 | 1.035745674                                                                           | 1.062901702 | 1.053375628 |             |             |
| YLR041W     | YLR041W::YLR041W::molecular_function unknown                                          | 1           |             | 1.239211924 |             |
| 1.079511254 | 1.133193921                                                                           | 1.100981876 | 1           | 1.209569576 |             |
| 0.904800537 | 1                                                                                     | 1.317799932 | 0.912272948 | 0.942237329 | 0.717199482 |
| 1.458334122 | 1.125507959                                                                           | 0.887656559 | 1.244471681 | 1           | 1.473349277 |
| 1.190375662 | 1.476692931                                                                           | 1           | 1.100475146 | 1.115215024 | 0.91398946  |
| 1.194280329 | 0.607511378                                                                           | 1           | 0.712559449 | 0.968206192 | 0.871714612 |
| 1.162077926 | 1.376148713                                                                           | 1           | 0.930614499 | 0.889184316 | 0.965915137 |
| 0.801136929 |                                                                                       | 0.519245027 |             |             |             |
| YIL026C     | YIL026C::IRR1::Irregular; involved in sister chromatid cohesion                       | 1           |             |             |             |
| 1.144494699 | 1.236255413                                                                           | 1.202435196 | 1.218818112 | 1           | 1.36086686  |
| 1.224652808 | 1.19262814                                                                            | 1.081634144 | 1           | 1.075658505 | 1.107549462 |
| 1.062409549 | 1.248732973                                                                           | 1           | 0.735797009 | 1.042079791 | 0.6415392   |
| 0.772673542 | 1                                                                                     | 0.729859047 | 0.972710459 | 0.687164606 | 0.666655014 |
| 0.941121607 | 0.940029523                                                                           | 0.852740753 | 0.948151469 | 1.016157398 | 1           |
| 0.900766603 | 0.923342808                                                                           | 0.934155126 | 1.013797234 | 0.733629732 | 1           |
| 1.029460055 | 1.045955413                                                                           | 1.012948625 | 1.035853326 | 1.10498658  | 0.963186421 |
| YLR043c     | YLR043c::TRX1::thioredoxin                                                            | 1           |             | 1.214415697 | 1.668254025 |
| 0.866970097 | 2.235872362                                                                           | 1           | 1.056759729 | 1.048179495 | 1.7173761   |
| 1.582535085 | 1                                                                                     | 1.066342535 | 1.223249434 | 2.232011158 | 1.186318264 |
| 0.852281424 | 0.564952574                                                                           | 0.655370732 | 1.359703985 | 1           | 2.130669466 |
| 2.942415518 | 3.531177399                                                                           | 1.506096084 | 1           | 1.271581296 | 1.484432767 |
| 1.165437972 | 1.286426346                                                                           | 1.288927022 | 1           | 1.263643299 | 2.057400639 |



1.907967733 1.488623274 2.216104015 1 1.006355501 1.380041423  
1.082164492 1.56273343 1.174433214 1.389615299  
YIL028W YIL028W::YIL028W::molecular\_function unknown 1 1.155169165  
1.083368938 1.273241037 1.279519209 1 1.17634507 1.082922012  
1.228836457 1.302926927 1 1.139734477 1.134992289 1.27904646  
1.33797202 1 1.102031645 1.224043026 1.61233864 0.949928285 1  
0.922380117 1.637216683 1.486321208 0.8114366 0.927764223  
0.961830374 0.961798544 0.846831711 1 0.74295489 0.722838098  
0.707763808 0.994763675 1 0.779808311  
0.801195979  
YLR057W YLR057W::YLR057W::molecular\_function unknown 1 1.889547281  
1.674735509 1.930672941 1.845201926 1 1.66077118  
1.997078101 1 1.291718558 1.350330332 1.410431891 1.504211222  
1 1.011263154  
1.010242878 0.978028491 1.18982904 1.026569862 1 0.859273625  
0.565370787 0.771523506 0.945724867 0.62298871 1 0.713680313  
0.556471453 0.623715005 0.627210377 0.740365947 0.446568232  
YIL042C YIL042C::YIL042C::molecular\_function unknown 1 0.960911954  
1.024398981 0.801194522 1 1.133840955 1.10870915 0.855796861  
1.028022242 1 1.265250036 1.259906094 1.419543464 1.121896372 1  
1.359277311 1.597160348 1.047489229 1 1.071278373 1.682712026  
0.988083818 0.998430292 1 0.911470519 1.022293159  
1.015141762 1 0.98246304 0.897134675 0.999408741 1.421608754  
1.221890537 0.745397077 1.003068755 0.658216209  
1.437774573  
YIL044C YIL044C::AGE2::ADP-ribosylation factor (ARF) GTPase activating  
protein (GAP) effector 1 0.777187169 0.848208566 0.832811753 1.107629285 1  
0.870244533 0.880488044 0.902315556 1 0.714382867 0.777788867  
0.783697603 0.872063417 1 1.335864051 0.78820037 1.076647439  
1.363217179 1 0.907199375 1.816193446 0.933928355 1  
0.914810641 0.890132154 0.745594708 0.80089323 0.870004381 1  
0.976171768 1.120738708 1.049178268 0.96178966 1.185065259 1  
1.098082647 1.097610892 1.014130315 1.086888315 1.217395144 1.799407378  
YIL046W YIL046W::MET30::F-box protein involved in sulfur metabolism and  
protein ubiquitination 1 0.878535407 0.903189334 1.011579929 0.693130935 1  
1.048822428 1.054989348 0.978111208 0.970196214 1 0.807293084  
1.007222934 0.766439351 0.949268439 1 0.933616502 0.757754414  
0.889598416 1.141476766 1 1.342216411 1.248366754 0.97854756 1  
1.001712921 0.913835843 0.950674896 0.85283242 0.905795453 1  
0.994210156 0.850693102 0.880799833 0.969306745 1.066957309 1  
0.925586038 0.994790757 1.143487813 1.146547194 0.996824377 1.126928036  
YIL048W YIL048W::NEO1::ATPase that leads to neomycin-resistant protein when  
overexpressed 1 0.767196724 0.684358619 1.13420156 0.834749026 1  
1.062755724 1.084151129 0.616247084 0.664082529 1 1.061842743  
0.905800319 0.481384913 0.854280143 1 1.12767611 1.130879024  
1.197821636 0.595122369 1 0.673825284 0.64613893 0.420984212  
0.626054872 1 1.130127285 1.258977556 1.291422906 1.004423647 1  
1.013105422 0.83518338 1.100166836 0.909575165 0.693473292 1  
1.137920625 0.919452576 1.231444046 0.956122166 0.904660056 0.758290381  
YDR155C YDR155C::CPR1::cyclophilin peptidyl-prolyl cis-trans isomerase 1  
1.553942624 1.5550492 1.20956001 1.236952129 1 1.243509807  
1.321282388 1.460716631 1.611316736 1 1.414663387 1.40366558  
3.161982135 1.10966277 1 0.999248352 0.848609915 1.639538276  
2.96702794 1 1.118514942 1.819777577 1.878755418 1.391536207 1  
1.325122679 1.173989307 1.926613489 1.258256322 0.982286531 1  
1.136645043 1.237331372 1.758705478 0.802600195 0.683481402 1  
0.874302243 0.903694864 1.0740785 0.616951885 0.764857085 1.005216354

YDR157W YDR157W::YDR157W::molecular\_function unknown 1 1.047711616  
1.073822217 0.942965654 1.037555962 1 1.062985514 1.05709758  
1.162945655 1 1.226881253 1.032846871 1.567416632 0.957029825 1  
0.763185097 0.773186246 0.915555973 0.963707 1 0.85126336  
1.197974596 0.958805903 0.87457093 0.984908215 0.932366224  
0.901210812 0.911381698 1.084135992 1 0.785494399 0.797899439  
0.78786842 1.018229416 1.073375185 1 0.816979293 0.875237903  
1.191817975 1.100432976 1.192864214 1.081395653  
YDR159W YDR159W::SAC3::involved in processes affecting the actin  
cytoskeleton and mitosis 1 1.128533927 1.082958415 1.259749954  
1.421683537 1 1.258442742 1.171357927 1.154176044 1.018410949 1  
1.050213265 1.159179925 1.102632967 1.26655098  
1 0.624518478 1.054525192 1.149580806  
1.030532501 0.880355933 1.022896173 1 0.906667221 0.813518359  
1.18036449 0.98445426 0.870240447 1 1.03921799 1.019921355  
1.105848893 1.125208121 1.140346147 0.737275415  
YDR161W YDR161W::TCI1::protein phosphatase Two C-Interacting protein 1  
0.723714489 0.652897365 0.776853861 0.869837703 1 0.660862259  
0.645596817 0.792195296 0.971017627 1 0.565687876 0.396875466  
0.383553995 0.854992178 1 0.37069383 0.195901343 0.190644785  
0.520871944 1 0.87078655 0.372919959 0.233407588 0.687819906 1  
1.004669561 0.760977524 0.912582151 1.038859268 1.115815328 1  
1.042575981 0.801000539 0.828296485 1.031258012 1.313189645 1  
0.741296671 0.633086315 0.709343928 0.960480999 0.46870374 0.851106531  
YLR059c YLR059c::REX2::RNA exonuclease 1 0.914876347 1.028656766  
0.835814692 0.872877495 1 0.876839565 1.387412002 1.017704331  
1.03376386 1 0.777091757 0.710159285 0.943593217 1.002602721 1  
0.677684822 0.467332541 0.58925159 0.8787602 1 1.055321285  
1.197396797 1.091402719 0.811797854 1 1.23782196 1.06807329  
1.160844438 0.999436166 0.891016714 1 0.974337638 0.890622486  
1.267187881 1.126092406 0.791471175 1 0.971110402 1.072899954  
1.05157897 0.995335137 0.690399031 1.277535408  
YDR175C YDR175C::RSM24::mitochondrial ribosome small subunit component 1  
0.85820619 1.213470444 1.159930133 1.383782738 1 1.126043674  
1.119186932 1.196398052 1.318904273 1 0.938340753 0.903476927  
1.058963296 1.11638744 1 1.037457363 0.646955582 0.723121956  
1.126795862 1 1.48367829 1.267963584 0.992607214 1.243133274 1  
1.016050804 1.169837568 0.822214617 0.719722197 0.899616582 1  
1.182552596 1.100113648 1.192280282 0.732901048 1.167399257 1  
1.320521207 1.017443724 0.948101127 1.182095724 1.461892188 0.890509573  
YLR061W YLR061W::RPL22A::Homology to rat L22 1 0.891084042  
1.31451864 0.774168372 1.751412878 1 0.823584138 0.839308323  
1.328517639 1.113341806 1 0.589802302 0.658561794 0.895300441  
0.893535678 1 0.623655389 0.292140757 0.239335957 0.739501999 1  
1.22995411 1.257440847 0.765712001 1 1.088354482 0.879138662  
0.61944112 0.835774938 1.0235639 1 1.256278533 1.744673579  
1.261625941 0.952153937 2.028113304 1 0.991410114 1.596043203  
0.959417927 1.840146295 0.904844308 1.314311665  
YDR177W YDR177W::UBC1::ubiquitin-conjugating enzyme 1 1.119086511  
1.439089036 1.31843109 1.918454493 1 1.186312626 1.232111698  
1.644330194 1.651767849 1 1.310554715 1.307860027 1.803067561  
1.646534616 1 1.097028437 0.829136263 0.860483482 1.680726118 1  
1.741118298 1.823410689 2.256418005 2.031289883 1 1.298567205  
1.292986789 0.954503694 0.812829574 1.274465308 1 1.419458579  
1.609948819 1.987765966 1.25528008 1.987393171 1 1.216696628  
1.614933075 1.141521433 1.733859484 1.354309521 1.178589866

YLR063W YLR063W::YLR063W::molecular\_function unknown 1 1.211021085  
1.052948575 1.316847751 1.009245098 1 1.320934941 1.223751621  
1.101034804 1.232952703 1 0.812355583 0.790927398 0.941345142  
1.103177215 0.629164015 0.83167534 0.876065496  
0.52580921 1 0.965787588 1.234686069 1.222770957 1.069147723  
0.907009457 1 0.694235941 1.019028146 0.673843793 0.867970404  
0.455960447 1 1.163463863 1.588414789 1.436848288 1.176390732  
0.720340423 1.36860028  
YDR179C YDR179C::CSN9::Cop9 Signalosome (CSN) 1 1.261340549  
1.43651394 1.351066565 1.925853752 1 1.110136602 1.089629209  
1.820628252 1.683265001 1 0.975868634 1.054767584 1.578461969  
1.302101412 1 0.743362091 1.034005632 1.644616276 1.341799219 1  
0.644364365 1.561224864 0.728065165 0.564886323 0.757797275  
0.956578429 1.318132785 1.313008172  
0.786189022 0.672479238  
YIL050W YIL050W::PCL7::PHO85 cyclin 1 0.972490025 0.993674917  
0.931534877 1.278001902 1 1.048266722 1.059832088 0.941968737  
1.072767561 1 0.734177723 0.91680506 1.048860229 1.179138574 1  
1.253100607 0.954610444 1.561037758 2.027102158 1 1.059196275  
1.419295307 1.385961288 1.460219895 1 1.114809497 1.084962809  
1.095612362 1.092577183 0.883218266 1 0.86358799 0.831990187  
0.728158711 0.683712858 0.939062804 1 0.940203894 0.848943551  
1.087052327 1.161220226 1.158450512  
YLR065C YLR065C::YLR065C::molecular\_function unknown 1 1.283681361  
1.241056661 0.995131906 1.779280563 1 1.127373213 0.950942422  
1.281890428 1.425275463 1 1.020438256 1.027161267 1.284795125  
1.032501644 1 1.105145221 0.892360993 0.921066236 1.347327257 1  
1.290173759 1.142615657 1.149281958 1 1.137176695 1.328355645  
0.718600154 0.868029974 0.830498874 1 0.560089794 1.126755247  
1.02595579 0.735053904 1.197419431 1 1.227040224 0.988792212  
0.926861298 1.926120397 1.150659039 1.56036192  
YDR181C "YDR181C::SAS4::Involved in silencing at telomeres, HML and HMR" 1  
0.621688141 0.873848268 0.921127829 0.945493121 1 0.811390343  
0.820016927 0.914727854 1 0.801967938 0.944251518 0.769548769  
1.042258733 1 0.841144434 0.97245647 1 2.135806041  
1.267866289 1 1.008498989 1.291079081 0.962860351 0.850654883  
1.191424867 1 1.133472669 1.211285541 0.882900492 1.477043468  
1.466927271 1 1.219038149 1.29702864 1.393993561 1.361177085  
1.488649423 0.897514579  
YIL052C YIL052C::RPL34B::Homology to rat L34 1 0.775298864  
1.161190605 0.734812429 1.680978724 1 0.867013661 0.852378236  
1.164888053 1.168432115 1 0.712956608 0.724192664 0.649712927  
0.853008357 1 1.039646149 0.501867144 0.601206515 1  
1.195676415 0.794152989 0.430215235 0.800510034 1 0.935441582  
0.89622459 0.586321536 0.79242678 0.971401909 1 1.355646676  
1.762616148 1.09045726 0.982088697 2.224584212 1 1.019610161  
1.334236815 1.094867341 1.983913103 1.100245042 1.147943055  
YLR067c YLR067c::PET309::Involved in expression of mitochondrial COX1 by  
regulating translation of COX1 mRNA and by affecting transcription or stability  
of COX1 mRNAs 1 0.944893963 0.906262208 1.096649232 0.900979192 1  
1.001184452 0.997803065 0.954913025 1 0.83356885 0.941489568  
0.743734295 0.960167576 1 0.855512528 0.842973917 1.426453935 1  
1.066385467 1.407114748 0.93266471 1 0.855928588 0.897879294  
0.91520357 0.784932667 1.013293046 1 0.921257895 0.748556344  
0.964156764 0.889236778 0.6447628 1 0.738518888 0.777419673  
0.783038929 0.939345151 0.741219153 1.222371128

YDR183W YDR183W::PLP1::Phosducin-Like Protein 1 0.976822537  
1.06619129 1.099243423 1.290313225 1 0.91622361 0.947975818  
1.076901153 1.19966706 1 1.01986666 1.14019226 0.992519266  
1.214239812 1 1.485264956 1.66556356 1.201137686 0.954509628 1  
0.616207929 0.586366894 0.498407345 0.503876957 1 0.9862884  
1.350012724 0.953202163 0.973279455 1.136287083 1 0.842305664  
1.49577552 1.295192907 1.545980596 1 1.104617985 1.224029599  
1.130045593 0.937797456 1.143652274 1.12167436  
YIL066C YIL066C::RNR3::Ribonucleotide reductase (ribonucleoside-diphosphate  
reductase) large subunit 1 0.810228315 0.697729353 1.151801602  
0.620865084 1 1.155959267 1.170283289 0.62742871 0.762934563 1  
0.891587967 0.728537418 0.543479277 1.472044743 1 1.021396884  
1.557275063 1.953324305 0.762821155 1 0.541736939 0.336425139  
0.173192839 0.391447152 1 1.252102395 1.336458239 1.648075883  
2.180121634 1.544286697 1 0.982600568 0.727216928 1.176936496  
1.533513951 0.574837755 1 0.689058912 0.561675318 0.742513259  
0.517290241 0.826869935 0.350249605  
YLR081w "YLR081w::GAL2::Galactose transport, also able to transport hexoses"  
1 1.394471744 1.033328948 1.42290568 1.041817846 1 1.531227645  
1.385450675 1.071511858 1 1.518029854 0.792674477 0.994869429  
0.916818474 1 5.280334847 3.341136254 4.668817788 2.222015575 1  
1.416661447 0.61231483 1 1.033024592 0.948058965  
0.95155072 0.829834757 0.96260243 1 0.958546981 0.719056786  
0.814164564 0.976248335 1.047020204 1 1.395165769 0.781412162  
0.581827433 1.463503495 1.510246929 0.941295842  
YDR185C YDR185C::YDR185C::molecular\_function unknown 1 1.309891944  
1.314108059 1.274265902 1.510405693 1 1.31918226 1.072697726  
1.489977318 1 0.841274692 1.090455607 1.690974173 1.283661089  
0.568667477 0.586368788 0.602380953 0.676380993 0.632911937  
0.575482443 0.420720852 1 0.896734027 0.97046174 0.800660055  
0.903893128 0.956536606  
0.604888145 0.98951376 0.915645032  
YLR083c YLR083c::EMP70::identified as a 24 kDa cleavage product in endosome-  
enriched membrane fractions 1 1.115609829 0.672751935 1.024444968  
0.526521197 1 1.080308132 1.020667859 0.549349074 0.677165456 1  
1.002354149 0.557374273 0.296458774 0.688323479 1 0.515384395  
0.293213486 0.243136723 0.371820999 1 0.405241101 0.161716068  
0.110017071 0.229824098 1 0.890752698 0.520819566 0.569827117  
1.192760733 0.899761158 1 0.976105845 0.26649551 0.589294663  
0.424538615 0.199578628 1 0.603298559 0.26029122 0.591790187  
0.505080396 0.41220301 0.467583198  
YIL068C YIL068C::SEC6::cytoplasmic protein involved in fusion of post-Golgi  
vesicles with the plasma membrane. The Exocyst complex is required for  
exocytosis. 1 0.965887231 0.890028653 1.091253905 0.911649832 1  
1.016843099 0.888693529 0.910533253 1 1.075848318 1.212207322  
0.573638413 0.997315782  
1 0.972282586 0.824195096 0.809749947 0.830796617 0.986565598 1  
1.078096863 1.515672909 1.06828886 0.983489777 1.532576404 1  
1.137957251 1.363366949 0.892945055 1.547134203 0.952289636 1.068261305  
YLR085C YLR085C::ARP6::Actin-related protein. Part of the carboxypeptidase Y  
pathway. 1 0.949270285 1.022015984 1.010743238 1.090691189 1  
1.006607509 0.976533957 1.145957044 1.187996487 1 0.996764565  
0.961037006 0.934604286 1.071594203 1 0.860909517 0.519729887  
0.858422302 0.943096311 1 0.761089748 1.364395217 1.304349958  
0.422366035 1 0.93651052 0.941282416 1.015297524 1.403890646  
0.83407816 1 0.944895372 0.989455288 1.097595201 0.811645179

|             |                                                                                                                                                                                                                   |             |             |             |               |
|-------------|-------------------------------------------------------------------------------------------------------------------------------------------------------------------------------------------------------------------|-------------|-------------|-------------|---------------|
| 0.788380594 |                                                                                                                                                                                                                   | 0.901066848 | 0.965823751 | 0.794530567 | 1.237816429   |
| 0.777619585 |                                                                                                                                                                                                                   | 0.899265805 |             |             |               |
| YIL070C     | YIL070C::MAM33::33-kDa mitochondrial acidic matrix protein 1                                                                                                                                                      |             |             |             |               |
| 0.782681088 | 1.05181391                                                                                                                                                                                                        | 1.092879763 | 1.117785386 | 1           | 0.872147092   |
| 1.04182608  | 1.223753396                                                                                                                                                                                                       | 1.234483471 | 1           | 0.763970741 | 0.847286728   |
| 1.255095713 | 0.964670445                                                                                                                                                                                                       | 1           | 1.055639038 | 0.831321534 | 0.979053781   |
| 1.519968318 | 1                                                                                                                                                                                                                 | 1.245228712 | 1.893244851 | 1.800660186 | 0.777362751 1 |
| 1.409264987 | 1.266572254                                                                                                                                                                                                       | 1.062351809 | 0.856364314 | 1.129978507 | 1             |
| 1.332141891 | 1.368796801                                                                                                                                                                                                       | 1.126838224 | 0.726620336 | 1.009772232 | 1             |
| 1.444625315 | 1.439386167                                                                                                                                                                                                       | 0.860856695 | 1.241269221 | 2.051090086 | 1.545476347   |
| YLR087C     | YLR087C::CSF1 1.124165016 0.942941314 1.094664903                                                                                                                                                                 |             |             |             |               |
| 1.117982559 | 1.125977049                                                                                                                                                                                                       | 1.169776893 |             | 1.065562378 |               |
| 0.951243618 | 0.927617782                                                                                                                                                                                                       | 0.865907402 | 0.962346168 |             |               |
|             |                                                                                                                                                                                                                   | 1           | 0.928557295 |             | 0.829337007   |
| 0.986317089 | 1                                                                                                                                                                                                                 | 0.958771231 | 0.857576755 | 0.818315547 | 0.883571829   |
| 0.707980777 | 1                                                                                                                                                                                                                 | 1.138141503 | 0.948205616 | 1.02061727  | 1.280290486   |
| 0.913275817 |                                                                                                                                                                                                                   |             |             |             |               |
| YIL072W     | YIL072W::HOP1::Meiosis-specific protein involved in homologous chromosome synapsis and chiasmata formation 1 1.206235075                                                                                          |             |             |             |               |
| 1.099847536 | 1                                                                                                                                                                                                                 | 1.31353644  | 1.255754786 | 1           | 1.006449732   |
| 1.080290047 | 1.517456019                                                                                                                                                                                                       | 1.185574158 | 1           | 0.726170727 | 0.991014695   |
| 1.36581113  | 0.79753483                                                                                                                                                                                                        | 1           | 0.80168792  | 1.814477302 | 1.064467176   |
| 0.701312386 | 1                                                                                                                                                                                                                 | 1.122180386 | 1.245282101 | 1.062607385 | 1.027456765 1 |
| 0.542510693 | 0.632733554                                                                                                                                                                                                       | 0.834294012 | 0.632143472 | 0.665874759 |               |
| 0.768122575 | 0.855973834                                                                                                                                                                                                       | 0.970745315 |             | 0.983494674 | 1.070888195   |
| YPR108W     | "YPR108W::RPN7::Regulatory Particle Non-ATPase, homolog of mammalian proteasomal subunit S10/p44" 1 0.635269561 0.757202841 0.919562917                                                                           |             |             |             |               |
| 0.865106906 | 1                                                                                                                                                                                                                 | 0.816288099 | 0.879448018 | 0.905654013 | 0.793069878 1 |
| 0.743633588 | 1.12836414                                                                                                                                                                                                        | 0.97372119  | 0.812715802 | 1           | 1.164139211   |
| 1.27323518  | 1.280899155                                                                                                                                                                                                       | 1           | 2.176504066 | 1.500360626 | 2.215771573   |
| 2.015568962 | 1                                                                                                                                                                                                                 | 1.203329283 | 1.65782054  | 1.791542489 | 0.926269241   |
| 1.248598516 | 1                                                                                                                                                                                                                 | 1.282904144 | 1.553935308 | 1.402629873 | 1.000355677   |
| 0.71166977  | 1                                                                                                                                                                                                                 | 1.441791464 | 1.740283318 | 1.540238912 | 0.975879917   |
| 1.431877781 | 1.061256299                                                                                                                                                                                                       |             |             |             |               |
| YLR089C     | YLR089C::YLR089C::not yet annotated 1 0.990320002 1.010192909                                                                                                                                                     |             |             |             |               |
| 0.851125938 | 0.67682735                                                                                                                                                                                                        | 1           | 1.024926379 | 1.143812718 | 0.649409421 1 |
| 1.055949352 | 0.896308662                                                                                                                                                                                                       | 0.608449817 | 0.786553586 | 1           | 1.146164426   |
| 1.095521184 | 1.277891023                                                                                                                                                                                                       | 1.148575679 | 1           | 0.567654329 | 0.601037909   |
| 0.816564347 | 0.779788755                                                                                                                                                                                                       | 1           | 1.110812467 | 0.932786935 | 1.070003235   |
| 1.331952603 | 1.113770896                                                                                                                                                                                                       | 1           | 0.87881985  | 0.525226413 | 0.967552585   |
| 0.71700942  | 0.575112116                                                                                                                                                                                                       | 1           | 0.870416283 | 0.676157046 | 1.061323282   |
| 0.920662611 | 1.428917183                                                                                                                                                                                                       | 0.675106128 |             |             |               |
| YPR078C     | YPR078C::YPR078C::molecular_function unknown 1.036743663                                                                                                                                                          |             |             |             |               |
| 1.044296101 | 1.019106737                                                                                                                                                                                                       |             | 1.070283556 | 1.241171655 | 1.119608138   |
| 1.221679638 | 1.15137854                                                                                                                                                                                                        | 0.892713129 |             | 1.170870824 | 1             |
| 0.765834929 | 2.178830833                                                                                                                                                                                                       | 1.213388605 | 1           | 0.845785123 | 1.312651548   |
| 0.789819471 | 1                                                                                                                                                                                                                 | 0.998829877 | 1.03458298  | 0.76275928  | 0.950668622   |
| 0.902558363 | 1                                                                                                                                                                                                                 | 1.329967495 | 1.136467929 | 1.347429548 | 1             |
| 0.899116386 | 0.926280857                                                                                                                                                                                                       | 0.816297207 | 1.098788039 | 1.0693681   |               |
| YIL076W     | YIL076W::SEC28::Part of a heptameric protein complex that regulates retrograde Golgi-to-ER protein traffic in eukaryotic cells; coatomer forms the COP I vesicle coat whose functions are essential 1 0.730378752 |             |             |             |               |
| 0.879636487 | 0.86570378                                                                                                                                                                                                        | 1.267403981 | 1           | 0.807405648 | 0.800437002   |
| 0.898421156 | 1                                                                                                                                                                                                                 | 0.707482501 | 0.948828309 | 0.910056273 | 0.912050788 1 |
| 1.428287266 | 1.069032854                                                                                                                                                                                                       | 0.897739632 | 1.485607543 | 1           | 1.197190886   |
| 1.381959603 | 1.91198529                                                                                                                                                                                                        | 1.141023673 | 1           | 1.028770126 | 1.220117178   |
| 0.923881517 | 0.754676126                                                                                                                                                                                                       | 0.992752853 | 1           | 1.303229373 | 1.872646997   |

1.700329099 1.071471928 1.328625782 1 1.370594543 1.488322652  
1.103841911 1.337164134 1.496017545 1.298550427  
YPR110C YPR110C::RPC40::RNA polymerase III (C) subunit 1 0.862633574  
0.600197691 0.669629956 0.720091604 1 0.664267246 0.604025104  
0.700838784 0.816854339 1 0.685232182 0.412879519 0.312023994  
0.74562435 1 0.582999523 0.309129609 0.580115717 1  
0.842756018 0.358045281 0.646001567 1 0.958954465 1.008822792  
0.894923028 1.088295565 1.013953778 1 0.859255035 0.715966671  
0.57247489 0.661688921 0.873204479 1.141957375 0.808895201  
0.96865996 1.356511193 0.794089589 0.913275817  
YIL091C YIL091C::YIL091C::molecular\_function unknown 1 0.77717441  
0.609600197 1.078417046 0.8333761 1 0.74706764 0.738181571  
0.857142112 0.993400218 1 0.403708629 0.350853322 0.892818498  
0.750284727 1 0.209624399 0.236516252 0.409473919 1  
0.360345112 0.414878604 0.259035644 0.721616265 1 0.606524107  
0.510916225 0.518665797 0.725021135 0.983780085 1 0.689992811  
0.676227833 0.649756557 1.152707407 1.157643162 1 0.614345482  
0.693667017 0.974532384 0.726762973 0.683813181 0.725892293  
YPR080W YPR080W::TEF1::translational elongation factor EF-1 alpha 1  
1.068287996 0.758402902 0.7857136 0.706279661 1 0.93121029  
0.85252812 0.686639705 0.858065025 1 0.888653667 0.727542259  
0.498714461 0.730780997 1 0.707995951 0.724741847 0.794420224 1  
0.976257804 0.404797154 0.166358011 0.589098596 1 1.253220397  
0.796253786 1.576573405 1.722208504 1.423168593 1 1.443731096  
0.955693386 0.798780456 0.470822226 0.468822742 1 1.136762136  
0.560062249 0.635301554 0.856996577 0.632558694 0.830091564  
YIL093C YIL093C::RSM25::mitochondrial ribosome small subunit component  
0.714146439 0.886000401 0.917997844 0.819397065 0.951198808  
0.923511095 1.016001311 0.761959459 0.858866179 0.493134841  
0.999547796 1 1.311644204 1.063018103 0.752039782 0.849741223 1  
1.207475339 1.509332589 1.063406607 1.015235003 1 1.15627213  
1.397809119 1.020481391 0.815916767 1.062446635 1 1.288677696  
1.293079227 1.284934951 0.907875526 0.94929836 1 1.228224584  
0.93802407 1.069837344 0.871964364 1.33487876 1.093654335  
YPR112C YPR112C::MRD1::Multiple RNA Binding Domain; essential for synthesis  
of the small ribosomal subunit 1 0.634791878 0.516214416 0.689672188  
0.6773126 1 0.595307928 0.551572426 0.774072021 0.817582918 1  
0.393564553 0.28619418 0.239350458 0.864744766 1 0.185469687  
0.14545746 0.340699878 0.550650979 0.551281968 0.375578023  
0.559873994 1 0.591256229 0.540412607 0.747330801 0.923673906  
0.750479091 1 0.772390604 0.565426819 0.593625647 1.493781049  
0.949353622 0.615861587 0.903052382 1.200137365 1.327222892  
0.604684504 0.809076598  
YPR082C YPR082C::DIB1::Homolog of S. pombe dim1+ 0.994879931  
1.124013353 1.274617683 0.762758634 0.760080313  
1.182030799 0.915074692 0.965695608 1.146363253 0.977031047 1  
1.071483401 0.627131164 1.193724254 1 2.183738244 2.540022871  
2.412176501 1.118995616 1 1.001501008 1.065442604 0.621173298  
0.910079183 1.015137551 1 0.8794299 1.358038484 1.11591961  
1.056327824 2.066289344 1 1.317064066 2.210348915 1.494034775  
2.99886666 2.329778425 1.460540817  
YDR199W YDR199W::YDR199W::molecular\_function unknown 1 0.904182138  
1.362544339 0.936913249 1.636689021 1 0.955002562 0.907225599  
1.516659541 1.329423387 1 1.058248724 1.314670286 1.776766038  
1.474220221 1 1.48346198 1.342201349 1.497204929  
0.642620168 1.036588998 0.907444974 0.317443123 1 0.78693566  
1.073390776 0.71746216 0.551568366 1.023947052 1 1.421338005

|         |                                                                                                                                                                                                                                 |             |             |             |              |             |
|---------|---------------------------------------------------------------------------------------------------------------------------------------------------------------------------------------------------------------------------------|-------------|-------------|-------------|--------------|-------------|
|         | 1.659983034                                                                                                                                                                                                                     | 1.920368813 | 2.206086297 | 1           | 1.242089612  | 1.506503408 |
|         | 1.434028861                                                                                                                                                                                                                     | 1.499592548 | 1.85384057  | 1.078768762 |              |             |
| YDR201W | YDR201W::SPC19::Spindle Pole Component of molecular weight 23kDa 1                                                                                                                                                              |             |             |             |              |             |
|         | 1.712123649                                                                                                                                                                                                                     | 1.581676709 | 1.474125839 | 1.746537212 | 1            | 1.395667295 |
|         | 1.338203584                                                                                                                                                                                                                     | 1.564306397 | 1.663965468 | 1           | 1.569632689  | 1.60574748  |
|         | 1.830048682                                                                                                                                                                                                                     | 1.185732229 | 0.974770855 |             |              |             |
|         | 1                                                                                                                                                                                                                               | 1.043187688 | 1.273357687 | 1.102063852 | 1.19511044   | 1.151471023 |
|         | 0.889252963                                                                                                                                                                                                                     | 0.99456741  | 0.659274057 | 0.863377355 | 0.866798337  | 1           |
|         | 0.79567232                                                                                                                                                                                                                      | 0.779780384 | 0.877002242 | 0.827762213 | 0.793662127  | 0.715384783 |
| YDR203W | YDR203W::YDR203W::molecular_function unknown 1 1.120810653                                                                                                                                                                      |             |             |             |              |             |
|         | 1.414047199                                                                                                                                                                                                                     | 1.553431269 | 1.875768464 | 1           | 1.35790873   | 1.314562482 |
|         | 1.57617146                                                                                                                                                                                                                      | 1.291026743 | 1           | 1.380109546 | 1.389881052  | 1.295401231 |
|         | 1.504612441                                                                                                                                                                                                                     | 1.072184786 | 0.851339885 | 1.370704296 | 2.010687155  | 1           |
|         | 1.368868065                                                                                                                                                                                                                     | 1.602322907 | 1.086430958 | 1           | 1.4444404788 |             |
|         | 0.987867582                                                                                                                                                                                                                     | 1.153124682 | 1           | 1.094768414 | 1.56044482   | 1.226869456 |
|         | 1                                                                                                                                                                                                                               | 1.24559001  | 0.843279932 | 1.207414038 | 1.170714377  | 1.413579062 |
|         | 2.341418598                                                                                                                                                                                                                     |             |             |             |              |             |
| YBL090W | YBL090W::MRP21::Mitochondrial Ribosomal Protein 1 0.884977982                                                                                                                                                                   |             |             |             |              |             |
|         | 0.965807497                                                                                                                                                                                                                     | 0.875967388 | 1.065387989 | 1           | 0.769535422  | 0.785394649 |
|         | 1.046571788                                                                                                                                                                                                                     | 1.153810628 | 1           | 0.840921181 | 0.690847969  | 0.805351821 |
|         | 0.95959233                                                                                                                                                                                                                      | 1           | 0.774613998 | 0.59368921  | 0.784521484  | 0.915119594 |
|         | 1.298292491                                                                                                                                                                                                                     | 1.450299412 | 1.500421374 | 0.629636095 | 1            | 1.105759751 |
|         | 0.813348809                                                                                                                                                                                                                     | 0.84010229  | 0.897282276 | 1           | 1.078560409  | 1.008359018 |
|         | 0.760400348                                                                                                                                                                                                                     | 0.863431113 | 1.204418655 | 1           | 1.2324248    | 1.337842818 |
|         | 1.176587485                                                                                                                                                                                                                     | 1.356206848 | 1.579057568 | 1.072639421 |              |             |
| YDR205W | YDR205W::MSC2::Meiotic Sister-Chromatid recombination; transmembrane protein (putative) showing some protein similarity to Zrc1p and Cot1p 1                                                                                    |             |             |             |              |             |
|         | 1.379404287                                                                                                                                                                                                                     | 0.838772277 | 1.045595238 | 0.774358023 | 1            | 1.134199019 |
|         | 1.069449739                                                                                                                                                                                                                     | 0.878186339 | 0.740237044 | 1           | 1.389051445  | 0.940341774 |
|         | 0.673662798                                                                                                                                                                                                                     | 0.90726422  | 1           | 0.869857231 | 0.772976664  | 0.820679444 |
|         | 0.360643185                                                                                                                                                                                                                     | 1           | 0.678093455 | 0.671342974 | 0.49968091   | 1           |
|         | 1.185519619                                                                                                                                                                                                                     | 1.137791374 | 1.657097058 | 1.250556051 | 1            | 0.89345299  |
|         | 0.509426639                                                                                                                                                                                                                     | 0.791857333 | 0.412335892 | 1           | 0.584292178  | 0.503541125 |
|         | 0.763688383                                                                                                                                                                                                                     | 0.517141152 | 0.677903691 | 0.352000857 |              |             |
| YBL092W | YBL092W::RPL32::Homology to rat L32 and mammalian L32 1                                                                                                                                                                         |             |             |             |              |             |
|         | 1.055534452                                                                                                                                                                                                                     | 1.09221022  | 0.908452903 | 1.06648257  | 1            | 0.90971207  |
|         | 0.997514677                                                                                                                                                                                                                     | 1.064357036 | 0.963773101 | 1           | 0.85678375   | 1.081195423 |
|         | 1.037458525                                                                                                                                                                                                                     | 0.899053172 | 1           | 0.725738175 | 0.487410046  | 0.341005897 |
|         | 0.482954944                                                                                                                                                                                                                     | 1           | 1.247680113 | 1.100691186 | 0.66917938   | 0.771238506 |
|         | 1.016710416                                                                                                                                                                                                                     | 0.85779789  | 0.656874314 | 0.845471951 | 0.947524962  | 1           |
|         | 1.193731704                                                                                                                                                                                                                     | 1.75451643  | 0.892085386 | 0.832286342 | 1.693090027  | 1           |
|         | 1.231412062                                                                                                                                                                                                                     | 1.435870242 | 1.044641145 | 1.848271438 | 1.06876851   | 1.235505476 |
| YDR207C | YDR207C::UME6::Regulator of both repression and induction of early meiotic genes. Ume6p requires Ume4 for mitotic repression and interacts with and requires Ime1p and Rim11p for induction of meiosis-specific transcription 1 |             |             |             |              |             |
|         | 1.232282856                                                                                                                                                                                                                     | 1.26588203  | 1.199190682 | 1.271902958 | 1            | 1.087065476 |
|         | 1.143641979                                                                                                                                                                                                                     | 1.243173445 | 1.188360269 | 1           | 1.326010894  | 1.159192011 |
|         | 1.367475242                                                                                                                                                                                                                     | 1.17242002  | 1           | 1.019849866 | 0.625509536  | 0.847492748 |
|         | 0.806035158                                                                                                                                                                                                                     | 1           | 1.31916644  | 1.483393536 | 1.158802694  | 1.117630443 |
|         | 1.070400252                                                                                                                                                                                                                     | 1.110055424 | 1.078800503 | 0.926843114 | 1.246088593  | 1           |
|         | 0.953201098                                                                                                                                                                                                                     | 1.146317906 | 0.949899597 | 0.835992132 | 1.801992943  | 1           |
|         | 0.702001527                                                                                                                                                                                                                     | 0.966426014 | 0.918809667 | 1.284832225 | 1.536498557  | 0.873872775 |
| YBL094C | YBL094C::YBL094C::molecular_function unknown 1 1.886105743                                                                                                                                                                      |             |             |             |              |             |
|         | 2.034138526                                                                                                                                                                                                                     | 1.721159806 | 2.12214585  | 1           | 1.573816973  | 1.546932037 |
|         | 2.170882217                                                                                                                                                                                                                     | 2.138971258 | 1           | 1.431895498 | 1.418441677  | 2.251195942 |
|         | 1.73766824                                                                                                                                                                                                                      | 1           |             | 1.362964631 | 2.082867329  | 1           |
|         | 1.505825437                                                                                                                                                                                                                     |             | 1           | 0.927272187 | 0.843225263  | 0.63846825  |

|         |                                                                               |             |             |             |             |             |             |
|---------|-------------------------------------------------------------------------------|-------------|-------------|-------------|-------------|-------------|-------------|
|         | 0.796676397                                                                   | 0.863040707 | 1           | 0.83699074  | 0.973335325 | 0.717867196 |             |
|         | 0.923840548                                                                   | 1.577445619 | 1           | 0.801602348 | 1.077593684 | 1.076128481 |             |
|         | 1.724567974                                                                   | 1.277028591 | 1.03761439  |             |             |             |             |
| YDR209C | YDR209C::YDR209C::molecular_function                                          | unknown     | 1           | 2.244832619 |             |             |             |
|         | 2.325291723                                                                   | 1.72968601  | 2.711028229 | 1           | 1.878477466 | 1.393171226 |             |
|         | 2.247896416                                                                   | 1.88815612  | 1           | 1.964931966 | 1.760383409 | 1.958322021 |             |
|         | 2.048524566                                                                   |             |             |             |             |             | 1           |
|         | 0.899957785                                                                   | 0.68196029  | 0.766731997 | 0.853881    | 0.853170297 | 1           |             |
|         | 0.665289488                                                                   | 0.861821514 |             | 1           | 0.981585263 |             |             |
|         | 0.766427164                                                                   | 1.901270693 | 0.712242754 | 2.477140293 |             |             |             |
| YBL096C | YBL096C::YBL096C::molecular_function                                          | unknown     | 1           | 1.256002091 |             |             |             |
|         | 1.10066454                                                                    | 1.165750097 | 0.972395135 | 1           | 1.141624725 | 1.108660072 |             |
|         | 1.032138178                                                                   | 1.075374044 | 1           | 1.052849957 | 0.986013473 | 1.021733203 |             |
|         | 0.981855926                                                                   | 1           | 1.014983308 | 0.733078593 | 0.939988423 | 1.006980734 | 1           |
|         | 1.043739782                                                                   | 0.819767982 | 0.687196653 |             | 1           | 0.825677823 | 0.87356431  |
|         | 1.096946621                                                                   | 1.061711624 | 1.102294122 | 1           | 0.789263081 | 0.690896454 |             |
|         | 0.770790695                                                                   | 0.762897797 | 0.930304646 | 1           | 0.604654259 | 0.752821702 |             |
|         | 0.904069721                                                                   | 0.868213329 | 0.883118377 | 0.858111537 |             |             |             |
| YDR223W | YDR223W::YDR223W::molecular_function                                          | unknown     | 1           | 1.858044013 |             |             |             |
|         | 1.683163931                                                                   | 1.899851788 | 1.507670947 | 1           | 1.693163775 | 1.593573605 |             |
|         | 1.572815732                                                                   | 1.634204661 | 1           | 1.950284281 | 1.729474505 | 1.6682002   |             |
|         | 1.758352349                                                                   | 1           |             | 1.660208532 | 0.862383155 | 1           |             |
|         | 1                                                                             | 1.00603998  | 1.321679445 | 1.118367621 | 1.10765883  | 1           |             |
|         | 1.000456707                                                                   | 0.669036838 | 0.850670852 | 1.125754415 | 0.814909745 | 1           |             |
|         | 0.577193177                                                                   | 0.736883682 | 0.833588974 | 0.714057878 | 0.672675412 | 1.745994219 |             |
| YBL098W | YBL098W::BNA4::Biosynthesis of Nicotinic Acid                                 |             | 1           | 0.897913539 |             |             |             |
|         | 0.773206181                                                                   | 1.053399777 | 0.919644197 | 1           | 0.973170244 | 0.903583088 |             |
|         | 0.890082259                                                                   | 0.884640395 | 1           | 0.81532163  | 0.889128512 | 0.894153434 |             |
|         | 0.966261564                                                                   | 1           | 0.965426864 | 1.724933216 | 1.722733443 | 0.846379863 | 1           |
|         | 0.868380075                                                                   | 0.641317659 | 0.603615604 | 0.614309644 | 1           | 0.740855407 |             |
|         | 0.914221036                                                                   | 0.886142505 | 1.087623315 | 1.260491806 | 1           | 0.997178903 |             |
|         | 0.610580074                                                                   | 0.828561456 | 1.033864116 | 1.979904825 | 1           | 0.919639761 |             |
|         | 0.684079192                                                                   | 0.701320933 | 0.838852886 | 1.756454483 | 0.758290381 |             |             |
| YIL095W | YIL095W::PRK1::p53 regulatory kinase                                          |             |             | 0.788023662 |             |             |             |
|         | 0.711140831                                                                   | 1.073928996 |             | 0.805113985 | 0.797932736 |             |             |
|         | 0.648630001                                                                   | 1.010809601 |             |             |             |             |             |
|         |                                                                               | 1           | 0.809845768 | 0.809091642 | 0.711171711 | 0.752773886 |             |
|         | 0.965103061                                                                   | 1           | 0.932698426 | 1.055095729 | 0.941434565 | 0.666291877 |             |
|         | 0.916693829                                                                   | 1           | 0.99452679  | 1.221350425 | 0.949940481 | 1.131737264 |             |
|         | 1.245137372                                                                   |             |             |             |             |             |             |
| YDR225W | YDR225W::HTA1::Histone H2A (HTA1 and HTA2 code for nearly identical proteins) |             | 1           | 1.862654849 | 1.73564073  | 1.223944442 | 2.718509825 |
|         | 1.245143909                                                                   | 1.214723668 | 1.925242029 | 1.700328643 | 1           | 1.276886017 |             |
|         | 1.091198738                                                                   | 1.158390924 | 1.730714594 | 1           | 0.758433045 | 0.662844304 |             |
|         | 0.462460048                                                                   | 0.704042152 | 1           | 1.499133411 | 1.119589756 | 0.875245801 |             |
|         | 0.994691069                                                                   | 1           | 0.801629054 | 0.755705502 | 0.660079527 | 1.119176355 |             |
|         | 1.012024231                                                                   | 1           | 0.50038996  | 0.958557575 | 0.67052806  | 0.826469429 |             |
|         | 1.437514358                                                                   | 1           | 0.542619743 | 0.82428797  | 1.165951987 | 1.826268078 |             |
|         | 1.52349236                                                                    | 1.089276219 |             |             |             |             |             |
| YIL097W | YIL097W::FYV10::Function required for Yeast Viability on toxin exposure       |             |             | 0.855744456 | 0.800589064 | 0.854263542 | 0.789049008 |
|         | 0.784244733                                                                   | 0.69163958  | 0.713678945 |             | 1.015142153 | 1.305222744 |             |
|         | 0.938850443                                                                   | 1           | 1.392200653 |             | 1.180113608 |             |             |
|         | 0.942658611                                                                   | 0.997099083 |             | 1           | 1.277242459 | 1.732546646 | 1.264418075 |
|         | 0.874540237                                                                   | 1.27251937  | 1           | 1.69224482  | 2.277311713 | 2.229839627 |             |
|         | 1.653690703                                                                   | 2.326197312 | 1           | 2.711833101 | 2.548271993 | 0.447435681 |             |
|         | 2.588769597                                                                   |             |             |             |             |             |             |



YDR227W "YDR227W::SIR4::regulator of silencing at HML, HMR, and telomeres"  
1 1.16900074 0.954234664 1.138399922 0.923933849 1 1.16720805  
1.119514937 1.0415801 0.930752413 1 1.140570039 1.082832489  
0.860714073 1.168722954 1 1.401805272 1.100591596 0.835562384 1  
0.710075607 0.415537204 0.262626357 0.459894573  
1.637736059 1 1.072930046  
1.997516424 0.879524483  
YDR227W "YDR227W::SIR4::regulator of silencing at HML, HMR, and telomeres"

1

1.009680001 1.002997598 0.970521387 0.911587303 1.009139622 1  
0.949138517 1.297351927 0.631945571 1.118151054 0.870154239 1  
1.5048489 1.56922466 1.724805281 1.53571264 1.088400659  
YDR229W YDR229W::YDR229W::molecular\_function unknown 1 0.867359678  
1.145848101 1.135082312 1.012465265 1 0.979179103 1.07436081  
1.269250829 1.117420811 1 0.923667716 1.358486229 1.43269487  
1.29690446 1 1.722848453 0.866995508 1.250545546 1.475740003 1  
2.009948035 1.718033357 1.478320743 1.406657788 1 1.17562112  
1.199109008 0.872048627 1.164117871 1 1.235704439 1.540497934  
1.41102318 1.066491298 1.081124597 1 1.073516307 1.224860147  
0.878432877 1.079107782 1.058629408  
YBL112C YBL112C::YBL112C::molecular\_function unknown 1 0.75826026  
0.647302016 1.063181857 0.477583852 1 1.140274993 1.103927044  
0.641395617 0.543819361 1 1.073754971 0.884686109 0.974762268  
0.720812564 1 0.711996206 0.609632062 0.385609419 1  
0.850462359 0.661161776 0.559113493 0.986196022 1 0.732550535  
0.998427174 1.096786156 1.033078037 0.952002644 1 0.699530667  
0.48810825 0.921801105 1.340915792 0.513010567 1 0.742370702  
0.732000541 1.173226311 0.495926269 1.075269454 0.676857354  
YIL099W "YIL099W::SGA1::intracellular sporulation-specific glucoamylase  
involved in glycogen degradation. Induced during starvation of a/a late in  
sporulation, but dispensable for sporulation" 0.911152392 0.865501669  
0.781584055 0.746953358 0.957685858 1.058840233 0.77191323  
1.230124858 1.099404672 1 1.593591144  
1.036371569 1.134596124 1.037423901  
0.858314198 1 0.88824469 2.343560921 1  
0.742635527 1.304354416 0.123084708 2.289239457 0.682111082  
YBR001C YBR001C::NTH2::hydrolyzes trehalose; may be involved in growth  
transition from glucose to glycerol; shows significant sequence similarity to  
Nth1p 1.046593979 0.866640472 0.73422675 0.997639873  
0.939116631 0.780586374 0.959683077 1.019639174 1  
0.785093765 0.6063692 1 0.809439183 1.112740544  
1 1.124388427 1.272860735 1.243579906 0.832982915 1.422794136 1  
0.460387293 0.586586729 1.05109732 0.956511652 0.797595131 1  
0.668481416 0.581534117 0.941962757 0.577409425 0.940950083 0.744280421  
YIL101C YIL101C::XBP1::DNA-binding transcriptional repressor  
0.994879931 0.958884765 0.786056648 0.529622237 1.015800776  
1.2170073 0.711200925 1.381654305 1.81927327 2.576687941  
0.756758499 1 3.65385769 0.967259099 0.504084309  
0.947131496 1 1.03740656 1.439909649 1.371537902  
1.267485677 1.173081344 1 0.944547174 0.785589597 1.477358751  
0.906588008 0.868114862 0.783216062 1.00515411 1.723468524  
0.751285375  
YBR003W YBR003W::COQ1::hexaprenyl diphosphate synthesis 1 1.146195911  
0.973603413 1.239920319 1.144416279 1 1.128430542 1.183132601  
1.125246219 1.050844479 1 1.252179699 1.136931351 1  
1.286905619 1.14029428 0.997886439 1 1.146067903 1.381018815

1.023504633 1.18038163 1 1.242061147 0.999672467 1.076261051  
1.097780395 1.18219935 1 1.077913751 0.942579084 1.121419177  
0.806657791 0.834472283 1 1.123608023 0.907396502 0.879774193  
0.93603015 1.152790934 1.075266311  
YIL115C YIL115C::NUP159::Located on cytoplasmic side of nuclear pore  
complex; may be involved in nuclear import or mRNA export; binds to karyopherin  
beta and a nuclear transport substrate in vitro 1 0.935357682 0.539232616  
1.049166151 0.600517541 1 1.052771949 0.484820134 1  
1.199873609 0.930592797 0.281739747 0.870613422  
1 0.786579659 0.613741906 0.978352961  
1.039107686 0.713079087 1 0.794950847 0.56269724 0.632617186  
0.722865716 0.383121244 1 0.735235584 0.713692643 0.996627462  
0.520173254 0.614332784 0.777554122  
YBR005W YBR005W::YBR005W::molecular\_function unknown 1 1.827665062  
1.503748232 1.42164167 1.085728002 1 1.37428985 1.309020805  
1.432938503 1.493718291 1 1.405442095 1.487392901  
0.708274855 0.585292896 0.694525988 0.54483015  
1.125283348 1.110924023 1.017063219 0.91572652 1  
1.582620586 1.828320175 2.185754008 1.935871188 1.846845754 1  
0.954658744 0.843660024 1.060617209 0.937735851 0.915027042  
YIL117C YIL117C::PRM5::pheromone-regulated membrane protein  
1.014580489 0.786056648 0.884987961 0.818452127 0.810605889  
0.829437463 0.758283898 1.12485469 1.230124858 1.092609213  
0.953535264 1 1.401469426 1.464384945 1.489453069 1  
1.728802799 2.358266142 1.336579481 1 1.094282297 1.13587065  
0.879978439 0.731709614 0.804599345 1 1.847128544 1.382879602  
1.451317219 2.224808675 1 1.657958564 1.31144678 0.753377344  
0.306874934 1.131046986 1.156699286  
YIL119C YIL119C::RPI1::inhibitor of ras 1 1.537685406 1.181360794  
1.158419903 1.368031168 1 1.212201287 1.161467473 1.083620159  
0.860744614 1 1.321676636 0.743284899 1.293366182  
1.356053228 2.568782953 1.228684609 1.357420097 1 0.577389576  
1 1.237247956 1.286348954 1.218536232 1.357257018 1.028624373 1  
1.206373017 0.921295373 2.028069041 1.078158209 1.311714377 1  
1.432403369 1.006868212 1.383372809 1.291787831 1.831369915 0.757414768  
YIL121W YIL121W::YIL121W::molecular\_function unknown 1 1.095689294  
0.748756808 0.833398545 0.430955157 1 1.178042702 1.05420328  
0.816983123 1 1.275586826 1.161055084 0.691042574 0.846206097 1  
0.731139094 0.073000902 0.387307381 0.314641065 1 1.402257157  
0.739182305 0.663995597 1 1.153371577 1.486658915 1.453950859  
1.489749701 1.177404854 1 0.938301472 0.694490409 1.054355846  
0.681000765 0.462914066 1 0.969757012 0.78480911 0.880696854  
0.59892075 0.774188532 1.080519988  
YIL123W YIL123W::SIM1::(putative) invovled in control of DNA replication 1  
0.800526493 0.977041753 0.535406361 1 1.014489256 0.95291634  
0.675023801 0.797500467 1 1.152251939 0.74516735 0.793175124  
0.763790753 1 0.85648958 0.789067719 0.493953198 1  
0.223239516 0.213043376 0.15308177 0.252639213 1 0.637152454  
0.490808799 0.740503338 1.075244437 0.465693223 1 0.500765044  
0.442911374 0.795513935 1.017040792 0.340017115 1 0.687528744  
0.470761611 0.840561012 0.400277176 0.801799947 0.535881878  
YIL125W YIL125W::KGD1::alpha-ketoglutarate dehydrogenase 1  
1.467583256 1.08861262 2.121396823 0.992919716 1 2.134868521  
1.046982353 0.980705296 1 1.532911694 1.290152616 1.437755301  
1.329111932 1.131871096 1  
1 0.808288381 0.527273023 0.635892049 1.23128666 0.716421933 1

0.640096357 0.253587202 0.372302042 0.452642596 0.444240447 1  
 0.714738077 0.346262741 0.625471851 0.550540284 1.154152162 0.699623598  
 YIL125W YIL125W::KGD1::alpha-ketoglutarate dehydrogenase  
 1.028276187  
 0.866097327 1.358888499 0.848360625 0.843004215 1  
 1 0.718475554 0.996008024 0.656347878 1.311963907 0.602255415  
 2.930713426  
 YDR231C "YDR231C::COX20::COX: cytochrome oxidase, 20: 20th gene involved in  
 cytochrome oxidase activity" 1 1.214917822 1.555313207 1.252136291  
 1.169877926 1 1.306510419 1.300535631 1.70372514 1.496173216 1  
 1.684757828 2.73982045 1.536358562 1 2.51184291 2.089697274  
 1.827514376 3.166495606 1 2.876082705 2.383828831 3.28967673  
 2.484648652 1 1.280703342 1.548178873 1.398965561 1.068172068  
 1.140608774 1 1.198238135 1.145052194 1.312682623 0.962647451  
 1.181900272 1 1.432991523 1.632686791 1.155862178 1.274681513  
 1.407072303 1.294172311  
 YDR233C YDR233C::YDR233C::molecular\_function unknown 1.317477155  
 0.932691949 0.909052724 0.843871267 1.069072844 0.968772956  
 0.788363138 0.871035289 1.107975844 0.953003041 0.926672818  
 0.810602901 1 1.098245316 0.982675675 0.916325577 1  
 0.503490375 0.404674752 0.449235433 0.708027338 1 1.14980999  
 0.924955348 0.931838733 1.069877319 0.648978191 1 0.945921699  
 0.800796224 0.616851843 0.706332499 0.855690156 1 0.889003718  
 0.848558989 0.894731267 0.903213108 0.792828034 0.887882787  
 YDR261C "YDR261C::EXG2::Exo-1,3-b-glucanase" 1 0.792034327  
 0.803710056 0.978115938 0.786573048 1 0.915562008 1.003061203  
 0.843811889 0.820833591 1 0.860521325 0.943895337 0.791940944  
 1.023428451 1 0.698250924 0.811595103 0.553595613 1  
 1.018971389 1.11348752 0.716466589 0.913905671 1 0.967416092  
 0.850309105 0.864319377 1.235638879 1.151259355 1 0.761862909  
 0.612965415 0.679898853 0.772229823 0.615472532 1 0.712040859  
 0.554551848 0.791660354 0.852666389 0.626666693 0.746907259  
 YBR007C YBR007C::YBR007C::molecular\_function unknown 1 0.921748667  
 0.926807571 1.127662078 0.989265352 1 0.911217918 0.989792472  
 0.949340323 1.033227198 1 1.128783948 0.775120309 1.117981147 1  
 1.029991033 0.703324676 0.698803273 0.635635186  
 0.639106163 0.73171881 0.91572652 1 1.209919858  
 1.494538161 1 0.572348221 1.186223919  
 1.16169415 0.578787476  
 YDR277C YDR277C::MTH1::Negative regulator of HXT gene expression 1  
 1.200243248 1.126579802 1.274102504 0.85406489 1 1.203106092  
 1.235692629 0.992270889 0.912734123 1 0.900208619 1.096961198  
 1.038976959 1 1.732882874 1.176520533 0.529696  
 0.666458542 0.727292678 1 0.957753578 0.852373227 1.14213352  
 1.17070856 1.021243716 1 0.757370099 0.659773336 0.852780233  
 0.789915049 1 0.659235544 0.587980073 0.812348246 0.828125787  
 0.636438187 0.732897299  
 YBR019C YBR019C::GAL10::UDP-glucose 4-epimerase 1 1.351969833  
 1.14579114 1.309588764 1.382912905 1 1.52361964 1.413032145  
 1.421828291 1.532214396 1 1.785722095 1.507332936  
 1.091729848 0.882242912 0.6876495 1 0.473921224  
 0.544045849 1 0.987157522 1.030832738 0.978966485 1.138728268 1  
 1.079139348 1.074371878 1.415675444 1.168307231 1.785502683 1  
 0.673957223 0.858500469 1.003712772 0.404690604 0.949428897 0.921156488  
 YDR279W YDR279W::YDR279W::molecular\_function unknown 1 0.718693227  
 0.736266522 0.747406867 0.85104669 1 0.719960155 0.704507139

|             |                                                                                 |             |             |             |             |             |
|-------------|---------------------------------------------------------------------------------|-------------|-------------|-------------|-------------|-------------|
| 0.896309034 | 0.856266615                                                                     | 1           | 0.587459678 | 0.56097509  | 0.419152635 |             |
| 0.929018658 | 1                                                                               | 0.704925574 | 0.545344397 | 1.071317105 | 1           |             |
| 1.924246457 | 2.377434528                                                                     | 1.855247223 | 2.779329786 | 1           | 1.099806872 |             |
| 0.911915208 | 1.059834447                                                                     | 0.934337765 | 1.167052425 | 1           | 0.909803963 |             |
| 1.235621928 | 1.041398272                                                                     | 0.992038008 | 1.027466396 | 1           | 1.058225444 |             |
| 1.12651061  | 1.04167221                                                                      | 1.133710697 | 0.895859601 | 1.009594469 |             |             |
| YBR021W     | YBR021W::FUR4::uracil permease                                                  |             |             | 1.466462798 | 0.93724723  |             |
| 1.057766094 | 0.876177236                                                                     | 1.077547903 | 1.034675813 | 0.930135989 |             |             |
| 1.049455026 | 0.883728232                                                                     | 0.668477175 | 0.768916419 | 1.359815778 | 1           |             |
| 0.60612607  | 0.626853305                                                                     | 0.958037535 | 0.686108951 | 1           | 0.669007935 |             |
| 0.865834636 | 0.855461345                                                                     | 0.689321612 | 0.834529251 |             |             |             |
| 0.950163918 | 0.913812744                                                                     | 1           | 0.529178151 | 0.983560933 | 1.119802191 |             |
| 1.288301315 | 1                                                                               | 0.874277464 | 0.992580474 | 1.301556626 | 0.778088111 |             |
| 1.064058684 | 0.833594067                                                                     |             |             |             |             |             |
| YDR281C     | YDR281C::PHM6::Phosphate metabolism; transcription is regulated by PHO system   | 1           | 1.192637739 | 0.957835503 | 0.76249418  | 0.977130701 |
| 0.621672163 | 0.992916361                                                                     | 1.094354848 | 1           | 0.589612202 | 0.654397035 |             |
| 0.53699897  | 1.049379259                                                                     |             |             | 0.870564289 |             |             |
| 0.2537884   |                                                                                 | 1           | 1.178726036 | 1.208327384 | 1.076852444 |             |
| 1.612201441 | 1.321924576                                                                     | 1           | 0.726504573 | 1.19228674  | 1.02610463  |             |
| 1.574759441 | 1.612830078                                                                     | 1           | 1.133454147 | 1.229895147 | 1.030401125 |             |
| 1.109028633 | 1.075005803                                                                     | 1.382610293 |             |             |             |             |
| YBR023C     | YBR023C::CHS3::Required for chitin synthesis                                    | 1           | 0.990657866 |             |             |             |
| 0.798441227 | 0.985670977                                                                     | 0.651213382 | 1           | 0.96790555  | 0.901569917 |             |
| 0.746568231 | 0.757462658                                                                     | 1           | 0.949399897 | 0.834729874 | 0.625464049 |             |
| 0.956750784 | 1                                                                               | 1.016622187 | 0.961176751 | 0.763437897 | 1           |             |
| 0.804910531 | 0.601973616                                                                     | 0.667840498 |             | 0.939257819 | 0.840326102 |             |
| 0.779971687 | 0.865812621                                                                     | 1.151116968 |             | 0.745542731 | 1.09288935  |             |
| 0.756058527 | 1.136162088                                                                     | 1.196891782 | 1           | 0.729545144 | 0.964096212 |             |
| 0.958143721 | 0.900990151                                                                     | 0.982973623 | 0.714509171 |             |             |             |
| YDR295C     | YDR295C::PLO2::Ploidy-related. Shares homology with PLO1                        | 1           |             |             |             |             |
| 0.606084051 | 0.752865704                                                                     | 0.862102643 | 0.772729869 | 1           | 0.768581647 |             |
| 0.878359302 | 0.822113687                                                                     | 0.831942094 | 1           | 0.736538153 | 0.905655596 |             |
| 0.698071032 | 1.051121277                                                                     | 1           | 0.885890524 |             | 0.841360298 |             |
| 0.314325102 | 0.511026069                                                                     | 0.419193515 | 0.402239585 | 1           | 1.060296926 |             |
| 1.10269328  | 1.02485346                                                                      | 0.911112705 | 1.137316299 | 1           | 1.117791112 | 1.161519    |
| 1.012764468 | 1.055969981                                                                     | 0.941435855 | 1           | 1.36356132  | 1.102991498 |             |
| 1.07605714  | 1.155049242                                                                     | 1.02975984  | 0.703126049 |             |             |             |
| YIL139C     | YIL139C::REV7::Protein required for mutagenesis by physical and chemical agents | 1           | 1.207856499 | 1.053855403 | 1.43461198  | 1           |
| 1.065139204 | 0.946030629                                                                     | 1.35965626  | 1.312614899 | 1           | 0.946431553 |             |
| 1.035944078 | 0.816686457                                                                     | 1.080498131 | 1           | 1.075769897 | 0.950863496 |             |
| 1.742830243 | 1                                                                               | 1.437455078 | 2.825827546 | 2.573346224 | 1.797899129 | 1           |
| 0.797685955 | 0.842915682                                                                     | 0.721931436 | 0.965142214 | 1           | 0.731495681 |             |
| 1.427923491 | 1.4691069                                                                       | 1.318296978 | 1.748020663 | 1           | 0.720366721 |             |
| 1.044725533 | 1.125450888                                                                     | 0.909494645 | 1.40862478  | 1.438650238 |             |             |
| YDR297W     | YDR297W::SUR2::Suppressor of rvs161 and rvs167 mutations                        | 1           |             |             |             |             |
| 1.472330564 | 1.005645479                                                                     | 0.856887808 | 0.896826632 | 1           | 0.902211694 |             |
| 0.895764675 | 1.002729955                                                                     | 1           | 1.255804733 | 0.609098313 | 0.576431221 |             |
| 1.599660884 | 1                                                                               | 0.230623791 | 0.36614255  | 0.86598629  | 1           |             |
| 1.186344229 | 0.376231367                                                                     | 0.281528942 | 0.938114719 | 1           | 1.080442822 |             |
| 0.606019837 | 0.745615897                                                                     | 1.40533992  | 1.359371678 | 1           | 0.872065338 |             |
| 0.735165726 | 0.580172017                                                                     | 0.59205199  | 0.828314243 | 1           | 1.043818179 |             |
| 0.77130731  | 0.856825032                                                                     | 1.347838604 | 0.859778799 | 0.817832829 |             |             |
| YBR025C     | YBR025C::YBR025C::molecular_function unknown                                    | 1           | 0.935211927 |             |             |             |
| 0.644270707 | 0.722602315                                                                     | 0.827269798 | 1           | 0.77812017  | 0.704351509 |             |
| 0.630636813 | 0.779533307                                                                     | 1           | 0.697532308 | 0.581808869 | 0.478756437 |             |

0.638949941 1 1.03873015 0.570783835 0.680896479 1.060763327 1  
 1.101902096 0.453272869 0.490262101 1.11863021 1 1.083327737  
 0.835927579 1.279705813 1.033959938 0.930725904 1 0.986498829  
 0.877158098 0.606119357 0.488744446 0.56031307 1 1.338676716  
 0.961421736 0.677163242 0.851440006 0.73042402 0.942171402  
 YDR299W YDR299W::BFR2::involved in protein transport step at the Brefeldin A  
 blocks 1 0.520821842 0.55022118 0.755910814 0.892548481 1  
 0.53390223 0.538178127 0.892451588 1.050496142 1 0.294616126  
 0.234198023 0.229751335 0.78388001 0.282006951 0.391222666  
 0.578837415 1.05485436 1 0.389157863 0.470985931 1  
 0.604642681 0.615397339 0.52697422 0.596497183 0.985610875 1  
 0.713695355 0.936886067 1.089283797 1.157286348 1 0.629459457  
 0.872348786 0.876566089 0.989521279 0.701451223 2.29676167  
 YBR027C YBR027C::YBR027C::molecular\_function unknown 1 1.1568607  
 1.017491393 1.263415547 1 0.857093157 0.874919217  
 1.184632343 1 0.887682109 0.91377969 1.086882546 1.172038555  
 0.363909958 0.307565 0.360428519 0.325945868 1 1.216585691  
 1.876484466 1.178017781 1 0.660531571 0.500497753  
 0.682430968 0.971783513 1 0.861226809 1.141694871 1.672201496  
 1.632906451 1 0.714317332 1.660706464 1.598028122 0.544675312  
 1.502070701  
 YIL141W YIL141W::YIL141W::molecular\_function unknown 1 1.03998071  
 0.938946494 1.721218494 1.09080549 1 1.502792166 1.193230231  
 1 1.324479656 1.034189119 0.559520572 1.232109696 1  
 1 0.256011827 1 0.815365112 0.978531843  
 0.890142999 1 0.587666568 0.471878613 0.814297995 0.934878321  
 0.731205787 1 0.57392251 1.006109742 0.033356779 0.812313305  
 0.570906857  
 YDR301W "YDR301W::CFT1::Functions in cleavage of 3'-ends of pre-mRNAs, prior  
 to polyadenylation; 23.5% identical to the 160-kDa subunit of mammalian cleavage  
 and polyadenylation specificity factor (CPSF-160)" 1 1.165164643  
 1.077661396 1.252258245 0.973172772 1 1.234601004 1.355568161  
 1.056178738 0.951563571 1 1.215354197 1.259773149 0.832082606  
 1.07929689 1 1.858284719 1.372943728 0.855954342 1  
 0.810254043 0.841038565 0.639220303 0.864033474 1 0.852861448  
 0.703200639 0.691673959 1.020611646 0.620561065 1.375239374  
 0.923709 1 1.82076062 1.102547342 1.455937196  
 0.779073158  
 YDR301W "YDR301W::CFT1::Functions in cleavage of 3'-ends of pre-mRNAs, prior  
 to polyadenylation; 23.5% identical to the 160-kDa subunit of mammalian cleavage  
 and polyadenylation specificity factor (CPSF-160)"  
 1 0.936732133 0.91449591  
 0.89193269 1.085765049 1.003728078 1 0.810367672 0.757236823  
 0.847577077 0.884630898 0.649119668 1 0.654697197 0.863676114  
 0.791398799 0.510497118 0.648744738 0.960559531  
 YBR029C "YBR029C::CDS1::CDP-diacylglycerol synthase, CTP-phosphatidic acid  
 cytidyltransferase, CDP-diglyceride synthetase" 1 1.65458709  
 0.993571489 1.034093095 0.980644656 1 1.425951093 1.223873263  
 0.800187285 0.923612064 1 1.074701364 0.861529009 1  
 0.799719466 0.662870287 1 0.811741271 0.987057932 1  
 0.761768463 0.671127938 0.926170761 1.055071253 0.977518372 1  
 0.689992769 0.987267564 0.813774137 0.67905637 1 0.409182726  
 0.682236202 0.720822058 0.578020897 0.631576615 0.90364392  
 YIL143C "YIL143C::SSL2::DNA helicase homolog; homolog of human XPBC, ERCC3"  
 1 1.255401107 0.90193196 0.990548956 0.866254988 1 1.018196308  
 0.878875135 0.810016467 0.806786877 1 0.969613596 1.042807964

|             |                                                                                                                                  |             |             |             |             |             |
|-------------|----------------------------------------------------------------------------------------------------------------------------------|-------------|-------------|-------------|-------------|-------------|
| 0.829303723 | 1                                                                                                                                | 0.995585421 | 0.87053709  | 1.049782687 | 0.85532275  | 1           |
| 1.193253967 | 0.921270773                                                                                                                      | 0.981544189 | 1.091935812 | 1           | 0.944242628 |             |
| 0.67419255  | 0.741905773                                                                                                                      | 1.05247253  | 0.87897119  | 1           | 0.803485283 |             |
| 0.95235666  | 0.552758432                                                                                                                      | 0.673366757 | 1.341333802 | 1           | 0.726331463 |             |
| 1.317228383 | 0.989550181                                                                                                                      | 1.232634728 | 0.983936228 | 1.079644427 |             |             |
| YBR043C     | "YBR043C::AQR2::A(acid, azole) Q(quinidine) Resistance"                                                                          |             |             |             |             | 1           |
| 0.720856892 | 0.636415445                                                                                                                      | 0.759906803 | 0.490974312 | 1           | 0.704689975 |             |
| 0.782449651 | 0.723272245                                                                                                                      | 0.63830736  | 1           | 1.241384943 | 0.907930518 |             |
| 0.569316713 | 0.800271032                                                                                                                      | 1           | 1.073670549 | 1.479581181 | 0.823160959 |             |
| 0.709383908 | 1                                                                                                                                | 1.07024518  | 1.046874129 | 0.71734639  | 0.708293029 | 1           |
| 1.034939849 | 1.061580439                                                                                                                      | 1.130019266 | 1.37681086  | 1.343612671 | 1           |             |
| 0.910477195 | 0.636679797                                                                                                                      | 0.912956056 | 0.959707048 | 0.421293155 | 1           |             |
| 0.764724618 | 0.645371023                                                                                                                      | 1.054266628 | 0.408613356 | 0.759069724 | 0.640081149 |             |
| YIL145C     | YIL145C::PAN6                                                                                                                    |             |             |             |             | 1           |
| 0.755176371 | 1                                                                                                                                | 0.94357122  | 0.857105711 | 0.781365412 | 0.863527105 | 1           |
| 1.025779495 | 0.925132233                                                                                                                      | 0.566149987 | 0.957353826 | 1           | 1.076701731 |             |
| 0.920140388 | 0.493267845                                                                                                                      | 0.897703399 | 1           | 1.208935423 | 0.516897281 |             |
| 0.532201059 | 0.981078911                                                                                                                      | 1           | 1.147616866 | 1.064506963 | 1.176249853 |             |
| 1.223201985 | 1.007222328                                                                                                                      | 1           | 0.909919227 | 1.135036531 | 0.910630119 |             |
| 0.808453221 | 1.110029038                                                                                                                      | 1           | 1.175644311 | 1.14787897  | 1.001683057 |             |
| 0.97630854  | 0.881001266                                                                                                                      | 1.219744238 |             |             |             |             |
| YBR045C     | YBR045C::GIP1::Developmentally-regulated protein phosphatase 1 (Glc7) interacting protein which is required for spore formation. |             |             |             |             | 1           |
| 1.111078784 | 1.057930478                                                                                                                      | 0.798259723 | 1           | 1.05288875  | 1.032727861 |             |
| 0.947552889 | 0.955803753                                                                                                                      | 1           | 1.416033788 | 1.341862864 | 1           |             |
| 0.739324157 | 0.66735218                                                                                                                       | 0.945021929 | 0.565785164 | 0.772689312 |             |             |
| 0.420405077 | 0.771865117                                                                                                                      | 0.715570618 | 0.710549586 | 0.761785812 |             |             |
| 0.756252872 | 0.719567719                                                                                                                      | 1           | 1.508656169 | 1.402428936 | 1.246943355 |             |
| 1.302500054 | 1                                                                                                                                | 0.491968688 | 0.53273661  | 0.611380134 | 0.421996237 |             |
| 0.605285613 | 1.061256299                                                                                                                      |             |             |             |             |             |
| YIL147C     | YIL147C::SLN1::Synthetic lethal of N-end rule                                                                                    |             |             |             |             | 1.051519064 |
| 0.716316531 | 1.289222335                                                                                                                      | 0.715626345 | 1.049701156 | 0.953395544 |             |             |
| 0.707483821 | 1.164640537                                                                                                                      | 0.988965398 | 0.462752133 | 1.220799262 | 1           |             |
| 0.922411313 | 1.167512021                                                                                                                      | 1.140463154 | 0.590711687 | 1           | 0.64827385  |             |
| 0.439897049 | 0.370084994                                                                                                                      | 0.294835469 | 1           | 1.049975839 | 0.964232301 |             |
| 1.258066872 | 1.255191271                                                                                                                      | 0.973883395 | 1           | 0.936204452 | 0.742608322 |             |
| 0.954457446 | 0.912160882                                                                                                                      | 0.497094778 | 1           | 0.722114302 | 0.963996719 |             |
| 1.172913896 | 0.619828684                                                                                                                      | 0.803012036 | 0.624319912 |             |             |             |
| YBR047W     | YBR047W::YBR047W::molecular_function unknown                                                                                     |             |             |             |             | 0.684595565 |
| 0.528883047 | 0.65493029                                                                                                                       | 0.550881256 | 0.511846002 |             |             |             |
| 2.863376    | 3.142477161                                                                                                                      | 0.819030076 | 0.468019113 |             |             |             |
| 0.346575354 | 0.983721148                                                                                                                      | 1.12716477  | 0.394629648 | 1           |             |             |
| 3.388893192 | 5.252571592                                                                                                                      | 3.139691339 | 0.978211058 | 1.24231676  | 1           |             |
| 3.502111832 | 9.317343303                                                                                                                      | 9.243103437 | 4.436130224 | 1.03721467  | 1           |             |
| 1.902793547 | 3.194264525                                                                                                                      | 1.180107405 | 0.549651622 | 0.728572649 | 0.576160585 |             |
| YIL149C     | YIL149C::MLP2::involved in translocation of macromolecules between the nucleoplasm and the NPC                                   |             |             |             |             | 1           |
| 0.989473311 | 1                                                                                                                                | 1.125986762 | 0.994030847 | 0.924097203 | 1           |             |
| 1.229534166 | 1.125586079                                                                                                                      | 1.170476047 | 1.16869309  | 1           | 1.165997164 |             |
| 1.61141467  | 0.9582165                                                                                                                        | 0.706649361 | 0.781635082 | 1           |             |             |
| 0.947441492 | 1.023508758                                                                                                                      | 0.794036033 | 0.957854432 | 1.035530772 | 1           |             |
| 1.067415688 | 1.181981543                                                                                                                      | 0.872007222 | 0.963938355 | 1.186110118 | 1           |             |
| 1.293114918 | 1.599894385                                                                                                                      | 1.156371107 | 1.138991783 | 1.119466305 | 1.01222136  |             |
| YIL163C     | YIL163C::YIL163C::molecular_function unknown                                                                                     |             |             |             |             | 1.033049777 |
| 1.049990186 | 1.019106737                                                                                                                      | 0.68648875  | 1.018479405 |             |             |             |
| 1.097910233 | 1.335670946                                                                                                                      | 0.934934479 | 1           | 1.418371454 |             |             |
| 1.251162953 | 1                                                                                                                                | 3.09753717  | 2.673131298 | 0.887087854 | 1           |             |

1.237447113 1.228625641 1.138092616 1.124641988 1.12654953 1  
0.868776886 0.809059218 1.084547848 1 1.0819807 1.184197062  
1.309215575 0.334058351 1.220648113 1.028858158  
YIL165C YIL165C::YIL165C::molecular\_function unknown 0.943165809  
0.881099034 0.895756656 0.751862078 0.811704323 1.083833665  
0.95528908 1.337045849 1.182527638 1.399942015 0.878153147 1  
1.992062905 3.229877792 1.673232045 1.355809261 1 5.314415263  
6.473729429 5.551871928 2.053555893 0.853663257 1.065824351  
0.8941385 0.868721307 0.918597099 1 0.921545746 1.126914496  
1 1.437031782 1.534779733 1.747593986 1.379983402  
YIL167W YIL167W::YIL167W::not yet annotated 1 1.196218369 1.172534389  
1.412676776 1.326403419 1 1.037345948 0.921947707 1.489276421  
1.381868381 1 3.153214502 3.264024839 1.155647517 1.905055609 1  
2.251844894 1.361967534 1.675386029 0.795126094 0.99186028  
0.563367034 1.383208346 1.774533103 0.965871626 0.545859488  
0.665026033 1 3.253001909 5.320364639 3.99126035 2.65961956  
1.486307007 1 2.902692944 3.73340587 1.145221346 0.369488762  
0.832435626 0.925534604  
YIL169C YIL169C::YIL169C::molecular\_function unknown 1 1.094026343  
0.820132008 1.268804709 0.733596698 1 1.081650544 1.013349983  
0.83041063 0.987556696 1 1.256614142 1.014948752 0.581128053  
0.811736584 1.167516741  
1 1.01750839 1.063558554 0.808927996 1.123747724 0.935915793 1  
0.543650764 0.675603014 1.024235691 0.50920421 0.194350444 1  
0.786942336 0.900661646 0.788614711 0.40289651 0.576341515 0.754787878  
YDR303C YDR303C::RSC3::Zinc cluster protein 1 0.848576821 0.652710716  
1.0422725 0.763880202 1 1.007889448 1.022138945 0.735677471  
0.72268801 1 0.809302032 0.781671543 0.464100481 0.738737568  
1.175494319 1.200711157 1 0.570877411 0.271454614  
0.447285901 1 0.785238453 0.580631007 0.624796878 1.027972528  
0.881264714 1 0.55534928 0.382033074 0.441927274 0.625129409  
0.490482306 1 0.486874712 0.432049076 0.701878247 0.514743016  
0.666660797 0.465831973  
YDR305C "YDR305C::HNT2::Fhit homolog, member of the histidine triad  
superfamily of nucleotide binding-proteins" 1 1.200413152 1.456809317  
1.093334234 1.660355238 1 1.154178048 1.061336197 1.81533875  
1.49029149 1 1.12149986 1.407978201 2.172355664 1.414719299  
0.547261008 0.379794802 1 2.007831653 2.32466139  
2.429542946 1 1.056772684 1.251788637 0.823497011 0.767292502  
0.95133042 1 1.10800027 1.678876835 1.374799584 1.410168412  
2.006669718 1 1.113619832 1.483079857 1.123562819 1.481476128  
1.360030543 1.214490457  
YDR319C YDR319C::YDR319C::molecular\_function unknown 1 1.426351755  
1.358515865 1.48331201 1.233959279 1 1.117683849 1.424436992  
1.139705626 1 1.16097238 1.400107637 1.355373776 1.222728134  
1 1.128842655  
1.095529135 1.003215758 0.91676901 1.021245078 0.770539064  
1.120880951 0.828377153 0.874752448 0.805158501 1 1.00194861  
1.149574903 0.852711171 2.547455336 0.900922617 1.212739232  
YDR319C YDR319C::YDR319C::molecular\_function unknown 1 1.262350955  
1.088029482 0.874948071 1.455046207 1 1.021198835 0.962961615  
1.151342284 1.189261585 1 1.456533099 1.245010736 1.413048478  
1.018878715 1 1.213247655 0.99582175 1.127388106 1.142308712 1  
2.100680386 2.561015128 2.151131494 1.779342677 1 1.757660796  
1.956244856 1.63988897 1.228917814 1.342600294 1 1.162677364  
1.579923149 1.428630962 1.223043589 0.924417545 1 1.619958003  
1.29280624 1.081408718 1.640919335

YBR049C YBR049C::REB1::DNA binding protein which binds sites found in genes transcribed by both RNA polymerase I and RNA polymerase II. Reblp is required for termination of RNA polymerase I transcription. 1 0.797190266  
0.804765218 0.947651477 0.705907677 1 0.9069359 1.04165979  
0.748631624 0.680234559 1 0.848120984 0.887971744 1  
1.027627538 0.569638945 0.628259437 1 0.89852535 0.638665773  
0.609678846 1.106733168 1 0.865320533 0.792072556 0.623368098  
0.880318849 1.103688371 1 1.147561799 0.754552088 0.958098269  
0.911591152 0.704666152 0.832890286 0.941571217 0.955104965  
0.821614158 0.787031036 0.586668095

YDR321W "YDR321W::ASP1::Asparaginase I, intracellular isozyme" 1  
1.404678555 0.819519152 0.746524463 1 1.099120455 0.903618958  
0.641198287 0.739509757 1 1.191734605 0.771583886 0.522568295  
0.619400781 1 0.90967966  
1 0.951724999 0.734048232 0.930780723 1.116020594 0.929293436 1  
0.955744512 0.677714027 0.556824479 0.621890585 0.563979979 1  
0.909648589 0.652169404 0.776975465 0.753631841 0.454389147 0.911524592

YBR051W YBR051W::YBR051W::molecular\_function unknown 1 1.224853192  
1.296232332 1.199248976 1.170724352 1 1.154083019 1.104423195  
1.31272762 1.254146346 1 1.362583692 1.433644604 1  
1.506913985 2.19603485 1.559093411 1 1.480822787 3.192673287  
2.28945191 1.606677205 1 0.991145752 1.022166083 1.405030844  
1.037178325 1.113850137 1 1.117711304 1.235586889  
1.716242086 1 1.12526607 1.1616613 0.150535161 1.508066532  
0.927285829

YDR323C YDR323C::PEP7::vacuolar segregation protein required for vacuole inheritance and vacuole protein sorting 1 1.229880922 1.114243455  
1.179710822 1.204182305 1 1.111917282 1.189724126 1.215152482  
1.193297648 1 0.979419804 1.047051849 1.125438094 1  
1.44309101 0.97732342 0.731641158 1  
0.989461404 1.010085844 1.166415807 1.087891504 1.082224124 1  
0.97679537 1.147965491 1.038688408 1.033444104 1.191650372 1  
0.870040626 1.018030935 1.30801065 1.262770476 0.891385238

YBR053C YBR053C::YBR053C::molecular\_function unknown 1 0.885478002  
1.044818726 1.050220047 1.031501697 1 1.001296951 1.12859894  
1.176634179 0.980147816 1 0.993141389 1.452160288 1.471924779  
1.181930984 1 2.264166781 2.332257041 2.873583799 2.180170237 1  
1.67845555 1.505909765 2.461245612 1.745374282 0.68703912  
0.735400422 1.061852625 0.64184541 1 1.164968028 1.51858185  
1.465001027 1.190806979 0.669867803 1 1.146123448 1.442177335  
0.985265714 0.506791198 1.276081729 0.981574549

YDR325W YDR325W::YCG1::Yeast Condensin G 1 0.665539256 0.771252757  
0.903817868 0.807876255 1 0.901863058 0.869264974 0.812358231  
0.744815062 1 0.688206538 0.66340462 0.407640623 0.852737319 1  
0.679686038 1 1.172024043 1.652984095 1.438189324  
0.738395884 0.754728813 0.830487999 0.979250541 0.840133636 1  
0.924718081 0.99569758 0.772156257 0.972363859 0.750251915 1  
0.703397702 0.77995792 0.81090533 0.729266842 0.828340286

YDR327W YDR327W::YDR327W::molecular\_function unknown 1 1.082456021  
1.427006565 1.044427817 1.591281715 1 1.022614047 1.94137328  
1.815432663 1 0.945815411 1.359283614 2.11170601 1.556947813 1  
0.967930253 0.745737376 1.099744082 1.704088025 1 2.346012305  
4.370419372 4.133001436 1.699570924 1 1.141523774 1.479301584  
1.27019273 1.098652429 1.076861384 1 1.169999723 2.118400068  
1.477843774 1.23800466 1.753386707 1 1.066911495 1.578011848  
1.259648034 1.617347566 1.291504993 1.274908518



YBR067C YBR067C::TIP1::cold- and heat-shock induced protein of the  
Srplp/Tiplp family of serine-alanine-rich proteins 1.342102871  
0.842725331 0.61050772 0.56878096 1.067862131 0.861131465  
0.659161838 1.396121847 1.185700811 1.031843797 0.688229276 1  
0.908781414 0.698941403 0.538032297 0.496315033 1 0.854071216  
0.739934581 0.695778665 1  
0.893165632 1.249289353 1.060584886 0.559969951 1.589939301 1  
1.408003427  
YDR329C YDR329C::PEX3::48-kDa peroxisomal integral membrane protein 1  
1.250025776 1.307211745 1.352503276 1.189298462 1 1.275267014  
1.252141175 1.016254175 1.196046175 1 1.222396941 1.046031233  
1.011390399 1.226609614 0.970915268  
1 1.040618293 0.993612725 1.395492642 1.141630587  
1.060990616 1 0.984459864 1.023681219 0.80349937 0.827673327  
0.753054012 1 0.714458901 0.684665027 0.955325031 0.8215516  
0.732661147 0.808200933  
YBR069C "YBR069C::TAT1::Amino acid transport protein for valine, leucine,  
isoleucine, and tyrosine" 1 0.68849169 0.429563055 0.7087146  
0.360604724 1 0.670969121 0.597166111 0.459478382 0.550280582 1  
0.601463872 0.437581885 0.224916188 0.634590665 1 0.340488185  
0.384630114 0.338055953 0.300875121 1 0.531504218 0.486177049  
0.321855056 0.799343244 1 1.131001445 0.810779516 1.492502752  
1.645793657 1.06197902 1 0.62084767 0.47042893 0.646843925  
0.604799397 0.468900499 1 0.728678936 0.593029509 0.771758861  
0.636484968 0.547185931 0.791564082  
YIL171W YIL171W::HXT12::molecular\_function unknown 1.31624581  
0.895110963 1.058884292 0.780238284 1.073915765 0.730063979  
0.760761992 1.18995877 0.875789686 0.719836652 1.048497199  
1 0.96211935  
0.954427039 1.139648056 0.885479518 0.986565598 1 0.964433319  
1.060155393 0.874799062 1.025541176 1 0.84130906 1.02625642  
1.219994817 0.557306505 1.621180813 0.762668497  
YDR343C YDR343C::HXT6::Repression of HXT6 expression by glucose requires  
SNF3 1 1.427800042 2.382296106 1.578752619 2.281738814 1  
1.77300121 2.378684447 2.090721215 1 1.384116495 1.102245572  
4.954329537 0.939114958 1 5.656599529 1.912755103 4.229452322  
2.648520937 1 6.736775534 10.9905822 6.807881799 2.818626483  
0.768068628 0.64888269 0.395578433 1.230413331  
1.285802891 0.94551896 1 0.41289375 1.103715856 0.515182489  
0.39216722 29.94634147  
YDR343C YDR343C::HXT6::Repression of HXT6 expression by glucose requires  
SNF3  
1.191098982 1.068526157 1.069848188 0.693545843 1.329673621 1  
1.152509061 1.09359763 1.240157065 0.557576257 1.969341265 1  
2.030848975 1.865914843 1.095642829 3.919752166 8.007111848 1.105913122  
YBR071W YBR071W::YBR071W::molecular\_function unknown 1 1.036332175  
0.878450947 0.915953241 0.997382718 1 0.830655631 0.796815387  
0.916492722 1.083491296 1 0.893829337 0.790116536 0.925493387  
1.057045356 1 1.059044685 1.858590909 1 1.197838759  
1.126121723 0.991971257 1.652278169 1 1.037329639 1.033825815  
1.179628601 0.926295756 1.03236526 1 0.84817529 1.187534685  
1.052570444 0.69288365 1.300850538 1 1.45749247 1.330309031  
1.066483732 1.1289433 1.610359181 1.314311665  
YIL173W YIL173W::VTH1::vps ten homolog 1 1.330787044 1.110834512  
1.286100195 1.294605943 1 1.332535131 1.24644656 1.315266375 1  
1.420814444 1.208438375 1.228456615 1.280792737 0.679422698

0.810741315 0.70794614 1  
 1.011011767 0.994237508 1.165581017 1.079105409 1.247713443 1  
 0.888954475 0.771555005 0.877640424 0.778646836 0.640521197 1  
 0.865584507 0.742799895 0.906786355 0.724516116 0.908312285 0.746907259  
 YIL173W YIL173W::VTH1::vps ten homolog  
 0.761221082 0.935127446  
 0.808260812 0.899747014 0.516710901 0.803237192  
 1.420192497 1 0.931548459  
 YDR345C YDR345C::HXT3::Low-affinity glucose transporter 1 1.315105771  
 0.805775425 0.971092527 0.74020141 1 1.269200113 1.031940463  
 0.724265587 0.812068928 1 1.508825278 0.526822393 0.537908231  
 0.689167093 1 0.512673971 0.951135581 0.897208237 1  
 2.501383385 0.520526774 0.429083213 0.999724295 1 1.490774258  
 0.617694515 1.459543193 2.135848418 1.236675171 1 1.133017412  
 0.410223756 0.522856511 0.666102189 0.478477012 1 1.291842564  
 0.362612224 0.570825676 0.659711868 0.420841683 1.253017939  
 YBR073W YBR073W::RDH54::genetic interaction with DMC1 1 0.619707796  
 0.599042956 0.669985828 1 0.692720244 0.696503533  
 0.724266475 1 0.631698281 0.632119925 0.493201045 0.951075764 1  
 0.371757326 0.843078655 1 0.730879379 1.305598396 0.677645086  
 1.370352446 1 0.819296039 0.948281607 0.960858936 0.779125385  
 1.029065818 1 0.958778239 1.311271267 1.043311944 0.944127981  
 1.289556589 1 1.089957149 1.36459189 1.11777276 1.193813455  
 1.373029306 1.119923134  
 YIR010W YIR010W::DSN1::Dosage Suppressor of NNF1 1 0.604741733  
 0.712114431 0.707355408 1 0.725335332 0.783263136 0.673743726 1  
 0.762138011 0.687187177 0.70874859 0.90221035 1 0.853325415  
 0.889420073 0.920878476 0.844436606 1 1.406368065 1.239307798  
 0.955571879 1 0.941720036 0.974863478 0.937156314 0.989153185 1  
 0.845004542 0.864751769 0.827876094 1.038152783 0.902652412 1  
 0.948658976 1.395591381 1.123016613 0.945260559 1.308158757 1.03936572  
 YBR075W YBR075W::YBR075W::molecular\_function unknown 1 1.026510563  
 0.786689905 1.027673781 0.902241218 1 0.888573812 0.823766737  
 0.843590196 0.91667563 1 0.943958639 0.813838258 0.607652909  
 1.008213092 1 0.723149905 0.790430442 1 0.704138383  
 0.672902205 0.648192005 0.927708501 1 1.012043444 0.891069778  
 1.117861782 1.258554586 0.826907431 1 0.95397692 0.844920509  
 1.17264847 0.72482419 0.785173707 1 1.108652418 1.332709428  
 1.16020345 1.339747138 1.129919917 0.800320314  
 YIR012W YIR012W::SQT1::Involved in a late step of 60S ribosomal subunit  
 assembly or modification; contains multiple WD repeats; interacts with Qsrlp 1  
 0.972411176 0.692168434 0.798427941 0.72224837 1 0.869165566  
 0.68354663 0.793161106 0.839275334 1 0.714342986 0.554732899  
 0.469925853 0.859231183 1 0.489944903 0.231860035 0.334410964  
 0.428146212 1 0.739213674 0.366041869 0.72846056 1  
 1.101572046 0.728190755 1.029040538 1.093290528 0.858250447 1  
 0.803209244 0.688521956 0.584071156 0.634950276 0.730233772 1  
 1.43609482 1.063752852 1.225793466 0.777364453 0.827464674  
 YBR077C YBR077C::YBR077C::molecular\_function unknown 0.950553582  
 0.917887301 0.725676742 0.871282396 0.682095213 0.908936266  
 0.836342565 0.712528537 0.853577599 0.913818618 0.785149164  
 0.908378826 1  
 1.26533648 1.209031458 1.218248194 1 0.993240117  
 1.232502513 1.330899321 1.232063299 1.333340673 1 1.313709618  
 0.963082263 1.221912442 0.749655201 1.448032353 1.302052878

YIR014W YIR014W::YIR014W::molecular\_function unknown 1 0.956591033  
0.944970231 0.937763841 1 0.919688656 0.9125341 0.873087928  
0.723212571 1 1.417249332 1.537005328 1.080166672 1  
2.775710606 1.280245456 0.683601323 1 3.326102018 5.333658576  
2.108870012 1.083189645 1 1.148144144 1.437985128 0.875063055  
1.039998752 1.10502067 0.87378481 0.918854624 0.868919422  
0.925556394 2.429511672 1 1.238057933 1.349819079 1.1944445  
1.46928585 3.296076644 1.048997512  
YBR090C YBR090C::YBR090C::molecular\_function unknown 1 1.905087046  
1.810071067 1.760584123 1 1.632427582 1.602340647  
1.692989063 1 1.59406296 1.919208015 2.143822542 1.609147819  
0.734409638 1 1.277007809  
1.268651872 1.467488279 1.254865561 1.288915828 1 1.036956092  
1.224290922 1.337189643 0.941191949 1.002547096 1 1.31132291  
0.968760056 1.11436399 0.879706158 1.212536874 0.974569543  
YIR016W YIR016W::YIR016W::molecular\_function unknown 1 1.360542857  
1.601118892 0.96061255 1.002889621 1 1.182145138 1.336296207  
1.245022381 1.225531924 1 1.688241593 1.980302587 2.995275041  
1.297558173 1 1.527869339 1.88080083 1.787976916 1  
2.14762171 2.192011074 2.339966444 1.217259519 1 1.062234749  
1.318980608 1.100861462 0.976173786 1.039406135 1 1.194202557  
0.903351061 1.388922203 1.146742416 1.66484362 1 1.233393559  
1.063880682 1.215973248 2.296010014 1.23375425  
YIR018W YIR018W::YAP5::bZIP protein; transcription factor 1  
0.825621152 0.871557327 1.059805635 0.879521556 1 0.781315442  
1.05768569 1.13439975 1 1.327508362 1.268093278 0.987409092  
1.202333581 1 1.149225152 0.476578733 0.826465762 0.747685861 1  
1.727885553 1.98454993 1.613501877 1.066319757 1 1.471513792  
1.4198992 1.519804365 1.027968673 1.425777323 1.355235836  
1.055161522 1.01977471 1 1.559085993 0.895098369  
1.070407168 0.559534996 1.121121344 1.082271213  
YIR020C YIR020C::YIR020C::molecular\_function unknown 1 1.445676088  
0.992455058 1 1.252455887 1.389050752 1.131125938 1  
2.001730757 1.419687281 1.461186269 1 1.373221291  
0.190923393 1 0.94422448 1.02301927  
1.162020873 1.256924963 0.884631119 1.139136323 0.963152832  
0.759288823 1.152231608 1 1.233425091 1.464455071 1.002987795  
1.075837203 1.673495782 1.111166903  
YIR034C YIR034C::LYS1::saccharopine dehydrogenase 1 1.53832402  
1.267486828 0.685653052 1 1.109641291 1.043489501  
0.819104504 1 2.690666577 1.921696851 1.042637641 0.956086929 1  
2.5757193 1.7880774 6.758343338 1.775260267 1 2.667101431  
3.152276963 4.626062453 3.242549066 1 0.882694432 0.913330433  
1.118709739 0.99955682 0.789361064 1 0.982987073 1.022543288  
0.973215952 0.775262513 0.847972941 1 1.006756275 1.057391037  
1.174785172 0.891369365 0.879467963 1.131306256  
YIR036C YIR036C::YIR036C::molecular\_function unknown 1 0.981473823  
0.94342794 0.609414727 1 0.976575171 1.074613357  
1.084055434 1 1.004498857 1.207466938 2.008222591 1.092509665 1  
2.13438727 2.707228957 2.428031861 0.881274453 1.140583359  
0.959541259 1.004511843 1 0.730140928 0.73900066 1.17710656  
0.973911881 0.653041124 1 0.943355046 1.132995728 1.501814798  
1.565404133 0.888229116 1 1.00236446 1.174594102 1.190034808  
0.832795855 1.287557526 1.008718805  
YDR347W YDR347W::MRP1::shows allele-specific genetic interactions with  
pet122 and pet123 1 0.876786454 0.98926218 1.008823171 1.057532127 1  
0.885844385 0.812858788 1.178145355 1.229904046 1 0.766373199

0.785722121 0.944307665 1 1.011942162 0.911316471  
1.297075451 1 1.676717956 1.554179949 1.855976384 1.773320946 1  
1.097957216 1.106846956 0.834444648 0.926606644 0.952697607 1  
1.101560558 1.168285126 1.028943956 0.699463818 1.199382385 1  
0.977110209 1.119173455 0.73828131 0.933320477 1.312172246 1.309057884  
YDR349C YDR349C::YPS7::Gpi-anchored aspartic protease (Yapsin 7)  
1.036743663 1.082365322 0.802754573 1.090865956 0.955592345  
0.692964543 0.74341563 1.009113999 0.707612704 0.753725048  
0.804728984 1.126918171  
0.819425392 0.797987652 0.570834188 1.09365806 0.979836975 1  
0.696483534 0.911094948 1.116757017 0.814351901 0.842607079 1  
0.646168614 0.991321315 0.278574911 0.872360786 0.679484244  
YDR351W YDR351W::SBE2::Required for bud growth 1 0.667580938  
0.566848593 0.817373332 0.674857012 1 0.692575921 0.690836385  
0.565689392 0.578020547 1 0.725650411 0.638825626 0.395882827  
0.837301959 0.766909985 0.74667877 1.240519712 1  
0.874998918 1.054916373 1.124163271 1.422643458 1 0.759539514  
0.981381895 0.803489817 0.912270632 0.974661289 1 1.008042053  
0.830463754 1.001783161 0.918105069 0.834211888 0.815846162  
0.810321891 0.94154997 0.567268321 0.954083907 0.751285375  
YBR091C "YBR091C::MRS5::Involved in mitochondrial biogenesis, may share a  
common function with Mrs11p" 1 1.339167328 1.664185213 1.171141561  
2.068782818 1 1.1762107 2.133848507 1.874990321 1  
1.309244129 1.106075938 1.48640405 1 0.932398074 0.849044114  
0.56832117 0.693067374 1 1.454536695 2.605964178 1.762616089  
1.039769156 1 1.017229573 1.065903524 0.932340569 1.074507884 1  
1.001223232 1.110084875 0.917184932 1.168687136 1.263567656 1  
0.838073821 0.816562528 0.85172404 0.603484387 0.94736498 0.488598217  
YDR353W YDR353W::TRR1::Thioredoxin reductase 1 0.921174993  
0.873044501 0.832593072 0.575584776 1 0.920352662 0.868819392  
0.721942014 1 1.51638999 1.545402005 1.125212293 0.853916435 1  
1.971859351 0.741658667 1.62818996 1.124225496 1 2.750747557  
2.700655207 1.727282566 1.144483827 1 1.664198828 2.464924706  
2.859473273 0.903379702 0.876101784 1 1.85156128 2.886270591  
3.254482454 1.090095119 0.651812092 1 1.77059947 2.105198365  
1.7980657 0.450282289 0.79749311 1.306430994  
YBR093C "YBR093C::PHO5::Acid phosphatase, repressible" 1 1.052155671  
0.614851262 0.799027932 0.571110719 1 0.850831128 0.804006236  
0.638901918 0.735555375 1 0.69952923 0.575245144 0.40367301  
0.562609739 1 1.031110603 0.461567245 0.565790571 0.610317556  
0.832379374 0.682113606 0.620309533 0.828396134 1 0.97494282  
0.996893255 0.925005369 1 0.911341949 1.354470944 1  
0.548497596 0.645128081 0.707522516 0.374067062 1.167206744  
YBR093C "YBR093C::PHO5::Acid phosphatase, repressible"  
1 1.325878329  
0.923926301 1.307636372 1.178303805 0.964379167 1 1.2313262  
1.155785885 0.980770926 0.745734268 1.089870052 1 1.14781423  
1.158860054 0.728001615 1.232391182 0.560823969 1.119923134  
YDR367W YDR367W::YDR367W::molecular\_function unknown 1 1.103064031  
1.036983877 0.65614781 1.199376824 1 0.748338925 0.719309657  
0.817738279 0.908283069 1 0.97029837 0.827906958 1.016779674  
1.048125501 0.649639781 0.43896964 0.643639925 1  
1.576807123 1.807107002 1.556625116 1.318800677 1 1.196540663  
1.394305693 0.995991311 1.11597097 1.129268668 1 1.068227442  
1.569414622 1.37158286 0.810925433 1.561052117 1 1.0148232  
1.356488708 0.848337997 1.213868685 1.131407721

YDR369C "YDR369C::XRS2::classified as an early recombination function, required for DNA repair but dispensable for mitotic recombination (xrs2 is hyper-Rec during vegetative growth), required for double strand breaks, meiotic recombination and spore viability" 1.164797477 0.589907732 1.212070254  
0.600107973 1.196199235 1.051151593 0.592266056 0.832625461  
1.092302614 0.683285211 2.434122913 1.423450002 0.562228804  
1 1.44924681 1.425107611  
1.813399943 0.950855969 0.860641133 1 2.131964254  
0.988367434 0.800361551 1 1.602664401 1.905889195 1.073672425  
0.532062375 1.182092421

YBR095C YBR095C::RXT2::Hypothetical ORF 1 0.81013943 0.892326855  
0.890801219 1.032249811 1 0.842003375 0.842112416 1.012652046 1  
0.874619329 0.900157863 0.976970522 1.160731265 1 0.61139162  
0.711168501 1.022698929 1 1.127867005 1.294852059 1.329078632  
1.74092375 1 0.813301337 0.94045141 0.798314221 0.768815436  
1.067087766 1 1.066873328 1.194714909 1.245043103 1.286213137  
1.538641152 1 1.077186649 0.955601997 1.243389069 0.899870679  
1.433685279 1.351087817

YDR371W YDR371W::CTS2::chitinase 1 1.03862171 1.060260746  
1.141353554 1.073959896 1 0.975104821 1.04971953 0.996505858 1  
1.049437978 1.231535993 1.091889088 1.190384784 1  
1.107977288 1.136554611 1 1.881309249 1.335369683 1.453816157  
1.585119201 1 0.945203612 1.055399717 0.874796588 0.864156768  
1.100140806 1 0.962120427 1.050028035 0.953956926 0.859306545  
1.285646842 1 1.012651114 0.899967667 1.136146177 1.048456431  
1.14881872

YBR097W YBR097W::VPS15::myristoylated protein kinase involved in vacuolar protein sorting 0.981661103 0.910441177 0.819662839  
0.660127594 0.837387399  
1 0.896965187 1.015272938  
0.759957503 1.043324402 1 1.239089797 1.354898907 1.366935  
1.209750271 1.741445938 1 0.461085107 0.798558921 0.681926625  
0.52569907 0.71776077 1.056002518

YDR373W YDR373W::FRQ1::Product of gene unknown 1 1.055742192  
1.360764749 0.888142363 1.429335005 1 0.831047328 0.825795824  
1.41591439 1.301306258 1 0.810943124 1.234719806 1.543855228  
1.163043992 1 1.306670002 0.737554948 0.925619016 1.572154127 1  
2.479363321 2.359657749 2.109184356 1.639829759 1 0.833840569  
0.951511202 0.623630958 0.670117689 0.942606955 1 0.952297839  
1.575348576 1.205773932 1.030408235 1.79196801 1 1.258644353  
1.687816438 1.257780335 1.434833782 1.661309347 1.488560842

YBR099C YBR099C::YBR099C::molecular\_function unknown 1 1.571456271  
1.426934211 1.026556149 1.367157569 1 1.003530222 0.965802184  
1.324386291 1.251288123 1 1.055429636 1.406010153 2.597496535  
0.967157109 1 0.632628767 3.837080975 1.158211255 1.529708571 1  
1.414299162 3.893090038 3.872257679 1.888001786 1 1.276172323  
1.016674525 1.01678324 0.871105884 1.02811725 1 1.260950819  
0.919562885 0.68820055 0.647320338 1.257262799 1 1.1226153  
1.00676552 0.866102581 0.909494645 0.939083214 1.240759256

YIR038C YIR038C::GTT1::Glutathione Transferase 1 1.160680548  
1.076652945 1.021666928 1.597415699 1 1.002809332 1.164064497  
1.647074205 2.055910506 1 0.970342175 1.320672064 3.180662963  
2.064270163 1 1.2920042 2.001322547 3.154855872 3.025215506 1  
1.266948178 2.252231589 2.159652983 1 1.079580616 1.509139035  
1.78505905 1.30205883 1.019909217 1 1.095873676 1.757950147  
2.488761014 3.190125804 2.055440735 1 1.000293805 1.393410813  
1.341479615 1.012833091 1.615369459 1.268779177

YDR375C "YDR375C::BCS1::Mitochondrial protein of the CDC48/PAS1/SEC18 ATPase family, required for expression of functional Rieske iron-sulfur protein" 1  
0.807767624 0.903948776 1.119123518 0.794563842 1 0.897383835  
1.038139326 0.970922727 0.974371521 1 1.05965284 0.967456148  
1.11798815 1.025131778 1 1.030848815 0.982163207 0.855865309  
0.942224611 1 1.903134025 1.853092737 1.948476589 1.934537103 1  
1.144156847 1.148877573 1.063866556 0.966697794 1.195451596 1  
1.117227114 1.213525306 1.098555519 0.736506056 0.888779506 1  
1.541866851 1.274135959 1.151579479 0.665826906 1.529121004 1.032360714  
YBR113W YBR113W::YBR113W::molecular\_function unknown  
0.908776739 0.995149924 0.840934398 1.064229922 0.973166427  
0.781738165 0.959683077 0.751387946 0.801791997  
1.029371846 0.812309025 0.462100458 1 1.153478779 0.958453815  
1.186020973 1.430820925 1 0.772736533 0.716673573 0.639620637  
0.886906912 1 1.050704311 0.671536943 0.844752935 1.033735432  
0.702096833 1 0.802741021 0.808155554 1.066744044 0.389220651  
1.162011742 0.870370271  
YIR040C YIR040C::YIR040C::molecular\_function unknown 0.896376918  
0.615771509 0.9286284 0.917148946 0.767163415 0.936703634  
1.37200923 1.057717 0.938358467 1.253105892 1 0.609506943  
0.526800938 1 1.069386922 1.055505782 1.067298881 1  
1.028319456 1.092450472 1.533463905 1.390606118 1.481532209 1  
1.062468959 1.089707551 1.775336726 0.893185516 1.060907354 1  
1.170809786 1.111058751 1.388507295 1.05759675 0.894012128  
YDR377W YDR377W::ATP17::Subunit f of mitochondrial ATP synthase. Homologous to bovine subunit f. 1 1.117816068 1.125859605 0.916692119 1.52610187 1  
0.940044722 0.946837606 1.314556192 1 0.840153571 0.960241648  
1.503258763 1.078797823 1 1.395970439 1.072302057 1.262077062  
2.040319481 1 2.644085494 1.886269436 2.681128666 2.421097058 1  
0.952638481 0.925362063 0.744463453 0.898712015 0.951968184 1  
0.987047838 1.029441655 0.795146104 0.648105238 1.373604451 1  
1.309771761 1.23647673 0.715633626 1.354684058 1.792115547 1.520083213  
YBR115C "YBR115C::LYS2::A key step in fungal biosynthesis of lysine, enzymatic reduction of alpha-amino adipate at C6 to the semialdehyde, requires two gene products in *Saccharomyces cerevisiae*, Lys2 and Lys5." 1  
1.079589196 0.814171836 0.961755643 0.665712495 1 0.997196819  
0.8767754 0.685478559 0.778650468 1 1.364178629 0.868653893  
0.586940283 1.021505087 1 1.249304029 0.608884782 1  
0.864326804 1.038788825 0.755491386 0.936355246 1 0.933789129  
0.79485633 1.291274552 1.426778051 1.249244062 1 1.053640172  
0.69174779 0.83261933 0.763339675 0.38063837 1 0.877549027  
0.656468841 1.047646426 0.606948642 0.738902024 0.735524137  
YIR042C YIR042C::YIR042C::molecular\_function unknown 0.783098504  
0.807301415 0.760658923 0.756705 0.846852552 0.827669347  
1.302082612 3.239787133 2.408414653 1 0.844355773  
1.49245802 1.016560728 1 0.812414272 1.141704126 1  
0.920692596 1 1.14239304  
1.737827006 2.329061234 1 0.906775555 1.452940203  
1.79843424 1.031485049  
YBR117C "YBR117C::TKL2::transketolase, homologous to tk11" 1  
1.122592468 0.910972698 0.929737932 1 1.025002041 1.064604816  
1.05433841 1 1.330819818 1.226095441 1.373615674 1.244280416 1  
1.150438221 1.121230432 1 0.963918318 0.712825202 0.851181916  
1.121933363 1 0.873180031 0.667645943 1.050337973 1.038530658  
0.950058444 1 0.955647299 0.809681801 1.260190013 1.003985845  
0.592269539 1 0.976890559 0.757059453 0.33682987 0.941025635  
0.747782872

YIR044C YIR044C::YIR044C::molecular\_function unknown 1 1.476832339  
0.830728185 1.29204523 0.923937292 1 1.303673413 1.186957169  
0.930602945 1.028602495 1 1.461626943 1.192174745 1.038001248  
1.181804394 1 0.678989287 0.77607864 0.939993464 1.118854384 1  
1.176665292 0.542046207 1.057646065 1.17488876 1 0.94823405  
1.036962892 1.594673403 1.372596622 1.161672506 1 0.788652771  
0.941004313 1.135418634 0.887886107 0.429955399 1 1.29215856  
0.727631585 0.281756267 1.133091039 0.92816139  
YBR119W YBR119W::MUD1::U1 snRNP A protein 1 0.95834946 1.200215101  
1.440072491 1 1.008477456 0.923079598 1.188931956 1  
1.182330669 1.291997521 1.34036264 1.260241071 1 1.096240225  
0.758339805 1.53759864 1 1.187432335 1.188058298  
1.828646114 1 1.046316344 1.301022626 0.95002481 0.887904089  
1.098295477 1 0.93865793 1.463031041 1.405120509 1.330681848  
2.073750821 1 1.314817208 1.487472916 1.488803045 1.204237144  
2.063757609  
YJL014W YJL014W::CCT3::Homolog of mammalian CCT family of chaperonin  
proteins; required for assembly of microtubules and actin in vivo 1  
0.937176323 0.796462837 0.966775088 0.832549993 1 0.966998292  
0.880018507 0.786923 1 0.94984762 0.867741102 0.634894296  
0.922441662 1 0.685472988 0.567340984 0.551576435 0.505130293 1  
0.962410903 0.465207845 0.496100784 0.614680823 1 0.953369463  
0.80486375 0.913190607 0.745198995 1 1.14263685 0.960191325  
1.023822634 0.678705893 0.689446041 1 1.173965919 1.116316875  
0.939707019 0.714958402 0.796370983 0.83446968  
YBR121C YBR121C::GRS1::Glycyl-tRNA synthase 1 1.10632354 0.824111784  
1.02111925 0.831310873 1 1.033495207 0.688154733 0.797955875 1  
1.033178776 0.898181293 0.362127742 0.968611355 1 0.51758503  
0.452646464 0.462428143 1 0.911645041 0.73957447 0.458610352  
0.903331407 1 1.148029551 0.992692606 1.187497599 1.415553622  
1.023690471 1 1.049652727 0.814244798 0.718499964 0.548955852  
0.639333423 1 0.912981487 0.778471516 0.833664315 0.811894056  
0.844765137 0.738151027  
YJL016W YJL016W::YJL016W::molecular\_function unknown 1 1.248159913  
1.48584791 1.277608958 1.558368391 1 1.094891692 1.291497235  
1.674392218 1.573031227 1 1.457635751 2.559672257 9.4058798  
2.545068299 1 2.140508622 2.646636534 5.447569327 3.350964468 1  
1.860420318 3.823950524 6.880172404 2.171645204 1 1.022372286  
1.027746662 0.852265823 0.803892516 0.825284126 1 1.001995522  
1.393367665 2.008413322 1.633355908 2.607480264 1 1.069277117  
1.852935635 1.042617553 2.116103941 1.255644829  
YJL018W YJL018W::YJL018W::molecular\_function unknown 1 1.053424289  
0.741830296 0.75125535 1 0.889784595 0.871430284 0.581545328  
0.822052515 1 1.125449162 0.815612005 0.443495973 1.065587048 1  
0.920312529 0.733236186 0.809135313 1 0.783375213  
1 0.902948757 0.843235397 0.986268728 1.183085706 0.91525515 1  
0.671716093 0.669600012 0.663241831 0.722865716 0.431011422 1  
0.879188252 0.699549668 0.896319745 0.69365773 0.799126349 0.755663491  
YJL020C YJL020C::BBC1::shows synthetic fitness defect with bni1 mutants and  
associates with the Beep-Vrp1p-Myo3/5p complex 1 0.875162022 1.042062231  
1.096561357 0.794787805 1 1.033416276 1.276359704 0.840632603 1  
1.468838661 1.756022521 0.962110946 1.175371291 1 1.168198806  
1.065824485 1.173095889 1 1.592365086 1.847774341 1.968520316  
1.436082497 1 1.131827197 1.323407988 1.70035182 1.273767776  
1.138362275 1 1.543122337 0.719166237 1.149702301 1.326986907  
0.440953754 1 0.738397517 0.741661228 0.919426934 0.536306419  
0.741751813 0.771424729

YJL022W YJL022W::YJL022W::molecular\_function unknown 1 0.980197989  
1.084642598 1.066059545 1 0.90384193 0.979613247  
1.005458437 1 1.067301323 0.993424188 1.201756144 1.245019081 1  
0.647462594 1.07230209 1.235946225 0.173460888  
1 1.029501164 1.109862039 1.01290819 1.553198146  
0.705331241 0.914940371 1.084434389 1 1.868197272  
1.650585151 2.21251185 1.610190848 2.410879748 0.870370271  
YJL024C "YJL024C::APS3::sigma3-like subunit of the yeast AP-3 complex which  
functions in transport of alkaline phosphatase to the vacuole via the alternate  
pathway, suppressor of loss of casein kinase 1 function" 1 0.760211769  
0.846464756 0.751996153 0.983993618 1 0.704135653 0.769988039  
0.964140951 0.938023371 1 0.902772666 0.853237703 0.920110723  
1.012796631 1 0.912619943 0.72205558 0.882213796 1.528366708 1  
2.751038912 2.489073321 1.904674282 1 0.870226744 1.039920152  
1.200004399 0.977816886 0.977807572 1 1.087263197 1.164954163  
1.177889852 1.148644871 1.115259255 1 0.984105449 0.799905975  
0.907229369 0.776337215 0.852797591 1.130430592  
YMR119WA YMR119WA::YMR119W-A::molecular\_function unknown 1 1.453781667  
1.501128107 1.112815993 1.651937114 1 1.313222247 1.19864112  
1.6433933 1.339812309 1 1.82478337 1.895165389 2.151832156  
1.061865369 1 2.785892429 1.820091695 1.344954143 1.366960183 1  
2.813845887 5.493232572 2.081505368 1.154036969 1 1.277366169  
1.590132962 1.515575026 1.283307454 1.299108933 1 1.402328229  
1.797036362 1.53957689 0.934519392 2.159800994 1 1.381149702  
1.918196254 1.197553516 2.075161485 2.279472627 1.299425988  
YJR094WA YJR094WA::RPL43B::Homology to human L37a 1 1.149233965  
1.146210837 1.464966485 1.42216747 1 1.184071004 1.203538103  
1.056025659 1.105775858 1 1.29863984 0.820725598 1.319549845 1  
0.759711828 0.623688976 0.559402204  
0.68163299 1 1.082876336 1.072181211 0.653194935 0.657690307  
0.945583325 1 1.011562711 0.941479827 0.828514887 0.615879912  
0.947777733 1 1.043726407 1.005330933 0.697448544 0.8423002  
0.749222184 1.207485451  
YOR304CA YOR304CA::YOR304C-A::not yet annotated 1 1.046089648  
1.307271876 1.036985944 1.641858736 1 0.871912995 1.407542629  
1 0.902316555 0.865699488 1.965900659 1.332053413 1 0.934530986  
1.097897266 0.593761542 1.109869203 1 1.757594127 1.970772437  
1.650543266 1.671052514 1 0.943667697 1.149565896 0.817847426  
0.787816678 1.186315626 1 0.846219906 1.283180818 1.203637709  
1.113487849 1.614156206 1 1.122715949 1.062724685 1.211690718  
0.946192407 1.312420772 0.823086558  
YDR391C YDR391C::YDR391C::molecular\_function unknown 0.696908423  
0.834753572 0.824073589 0.859534803 0.674375473 0.810605889  
0.837581575 1.36445489 1.891908305 0.851720435 1  
2.850741722 3.550736512 3.733371288 3.454798759 1 2.689879552  
2.504458919 5.169337724 2.777718936 1 1.231012024 1.642189815  
1.438236336 0.940894599 1.097910656 1 1.027670156 1.827344574  
2.295373093 1.236673793 1.730730409 1 1.640503782 2.014188776  
1.316340957 1.319793008 2.612886196 1.313436  
YDR393W YDR393W::SHE9::Mrna (identified by a library screen) that causes  
growth arrest when overexpressed 0.907458505 0.967995327 0.898989406  
0.951557871 0.806344858 0.757883577 0.976352473  
0.956066155 0.969926484 1.073912189 0.908501766 0.56587531  
0.423209454 0.380870726 0.345200031 1 1.646851679 2.115215204  
1.244654307 1.794931285 1 1.047569674 1.126454689 0.981043668  
0.961604377 1.194291474 1 1.109148358 1.147490119 1.170373551



0.970558956 1.003321809 1 1.068700531 1.184280171 0.948582097  
 0.906544177 1.005310194 1.056878183  
 YDR395W YDR395W::SXM1::Suppressor of mRNA export mutant; Importin-beta like  
 gene 1 1.143411817 0.733120491 0.954708356 0.663714093 1  
 1.031354341 0.684268453 0.657625669 1 1.020772366 0.675861209  
 0.707636777 0.803172797 1.173632911 0.89192607 0.852685387 1  
 0.467338678 0.191540985 0.422090524 1 0.951968354 0.736189848  
 0.765237337 1.115779072 0.813782314 1 0.801641167 0.522596401  
 0.795120112 0.713822378 0.557467485 1 0.849691262 0.764222981  
 0.931871257 0.903999891 0.726166493 0.653215497  
 YBR123C YBR123C::TFC1::transcription factor tau (TFIIIC) subunit 95 1  
 1.002384133 1.124086064 1.000609459 1.04437986 1 1.094745525  
 1.063695581 0.849478361 1.017667567 1 1.022706479 1.017741641  
 1.263589746 1.153911269 1 1.148098462 1.052941096 1.078431139  
 1.222027422 1 1.14644537 1.006930882 1.047636982 1.195555983 1  
 0.952553721 0.922028309 0.810149543 0.925323944 1 0.919595806  
 1.057171062 0.962531837 0.985808025 1.270668476 1 0.969748583  
 1.052617429 1.093144804 0.753005776 1.284021631 1.14881872  
 YDR397C YDR397C::NCB2::Negative Cofactor B2 is the beta subunit of a  
 negative regulator of RNA polymerase II holoenzyme. It is homologous to the Dr1  
 subunit of the mammalian NC2 (negative cofactor2) 1 1.083301735  
 1.227781909 1.038412176 1.736289953 1 0.960383156 1.018523534  
 1.717144664 1.633435594 1 0.865421106 1.053194572 1.289228648  
 1.542185154 1 1.016708351 0.619484619 1.02804046 1  
 2.367380739 2.084868518 1.840961346 1.860249255 1 0.9503721  
 1.028190044 0.706799442 1.029932986 1 1.317247461 1.774693147  
 1.643521293 1.474959327 2.466623996 1 0.959866172 1.032163523  
 0.87459296 1.006500511 1.156298436 1.25827172  
 YDR399W YDR399W::HPT1::enzyme involved in de novo purine biosynthesis 1  
 0.877020954 0.645002633 0.921467469 1 0.781414346 0.686647597  
 1.056524081 0.94906848 1 0.642533646 0.578706828 1.236087179  
 1.380741504 1 0.696394669 0.694828119 0.237027321 0.331630905 1  
 1.500205822 0.860594171 0.525520719 0.575711937 1 0.759440332  
 0.629643414 0.378567629 0.952696255 1.364231551 1 0.50714596  
 0.735838476 0.419586314 0.747521581 2.927735251 1 0.508619744  
 0.512688059 0.702865403 1.529148453 1.758645598 1.073514981  
 YBR137W YBR137W::YBR137W::molecular\_function unknown 1 1.261962619  
 1.272854716 1.35030427 1.320576304 1 1.149264854 1.641692404  
 1.287580959 1 1.221900542 1.624592714 1.718118896 1.355539928 1  
 0.849654514 1.52416251 1.437117569 1 0.969434627 1.331595435  
 1.279012578 0.95486666 1 1.152843311 1.29323413 1.416126186  
 1.073460922 1.089999856 1 0.918576523 1.277059125 1.429355247  
 1.060973067 1.193331492 1 1.387026371 1.434356679 1.237937472  
 1.168567656 1.854426594 1.300301653  
 YDR401W YDR401W::YDR401W::molecular\_function unknown 1 1.251777268  
 1.348600568 1 1.752983528 1 0.964045788  
 0.888733813 1.771169348 1.578133513 3.512392323 0.406692459  
 0.390584929 1 1.171905213 0.934432818  
 0.814554876 0.823415688 1.51735363 0.924338372 1 0.482999831  
 0.632027935 0.430760606 1 0.827150468 0.7199579 0.39250815  
 0.591009991 0.68386236  
 YBR139W YBR139W::YBR139W::molecular\_function unknown 1 1.444769601  
 1.157985854 1.101997113 1 1.431476862 1.424745292 1.09837004  
 1.13426198 1 1.389500892 1.764672521 1.907796049 1.17062216  
 1.233198744 1.327450535 0.784335444 0.876065496 1 0.914172054  
 0.992382229 1.321173381 1.025993626 1.273834932 1.671079248  
 0.972463685 0.843961132 1 1.141864025 1.361826313 1.764310323

1.104721727 0.931127764 1 1.419106359 1.440697737 1.315555947  
0.748791408 2.291855605 0.888758347  
YDR415C YDR415C::YDR415C::molecular\_function unknown 1 1.256844807  
1.141772171 1.07515485 1 1.150440887 1.184023874  
1.050202968 1 1.315328885 1.15907847 1.236686085 0.853503123 1  
1.012386666 0.932859561 0.69103539 0.750407734 1 1.169328685  
0.604512493 0.922374116 0.921553697 1 1.228579811 1.17666284  
0.945809926 1.119111623 1.172662272 1 1.09918303 1.074794995  
1.191169016 0.996389293 1.102733006 1 1.028638884 0.747451071  
0.965816993 0.875788077 1.170316744 0.964937646  
YBR141C YBR141C::YBR141C::molecular\_function unknown 1.014580489  
0.776673855 0.863208729 0.805691501 0.835402317 0.645848615  
0.836062357 0.973874453 0.805362155 0.910694339 0.83669328  
0.975073036 0.597217684  
1 1.019272238 1.029810445 0.94703885 0.889559679 0.953963649  
1.031370354 1.646636233 1.274342117 1.479781816 1.718777392 1  
0.963936658 1.123995996 1.003619205 0.763313225 0.841074359 1.140062488  
YDR417C YDR417C::YDR417C::molecular\_function unknown 1 1.28855051  
1.241719781 0.890531371 1.894683051 1 0.968571773 0.990648286  
1.325357993 1 0.974497144 0.85619295 1.246456669 1.574487072 1  
0.684077373 0.216517881 0.528792726 1 1.212525497 0.653723933  
0.474029384 0.872519727 1 1.189029865 1.148803841 0.825870647  
1.276270695 1.184413947 1 1.12145302 1.417299327 0.920695029  
0.541942076 1.390052198 1 1.002700747 1.133894036 0.654729313  
1.402568203 0.997791611 1.421137775  
YBR143C YBR143C::SUP45::Recessive omnipotent suppressor. The wild-type gene  
functions in termination of translation. 1 1.289967774 0.877800337  
1.122185191 1.157036125 1 1.163043978 0.916896996 0.880952832  
0.930352497 1 0.752290931 0.728767389 0.517153848 0.984578818 1  
0.496605616 0.351141187 0.267461473 0.557151079 1 0.643448137  
0.29219322 0.494138102 1.041180615 1 1.106759158  
1 0.912911065 0.753148335 0.691957803 0.598705092 0.808346351 1  
1.068058116 0.915027042  
YDR419W YDR419W::RAD30::Radiation sensitive 0.818805881 0.863224062  
1.100255694 0.968200363 1.000061298 0.99623248 0.954049996  
0.904224 0.977330534 0.681273983 1.211009382 1 0.864874463  
0.852610284 0.924572493 1 1.795541333 0.886867731 1.27142784 1  
1.008896738 0.923084962 1.088906072 1.194397075 1.189307011 1  
0.793780631 0.847624121 0.865567709 0.925274644 0.68288517 1  
1.010124983 1.068125045 0.702703531 1.023930872 0.806449707  
YBR145W YBR145W::ADH5::alcohol dehydrogenase isoenzyme V 1  
2.074859157 1.549121427 1.119255484 0.955279642 1 1.378870662  
1.339753838 1.191030182 0.97084899 1 3.311984463 2.095095564  
1.657756779 0.977364517 1 4.619569457 2.583638081 1.859388372  
1.178979629 1 3.157926659 2.045373929 1.109003241 1.057536514 1  
1.075512695 0.98846322 1.041252081 1.4412527 1 0.949015711  
0.990439707 1.296917316 1.262032839 0.612071591 1 1.308997494  
0.961464627 1.171192947 0.477208442 1.269845567 0.745156034  
YDR421W YDR421W::ARO80 1 0.820443082 0.955320241 0.901484081 1  
0.960244677 0.99678697 0.876387758 1 1.056190553 1.255309526  
0.965793598 1.051752868 1 1.521823456 1.304347589 1.202610942 1  
2.424251312 2.129067125 1.88457949 1.554684321 1 0.948310342  
1.033426868 0.985950438 0.810446949 0.971783513 1 1.06865167  
1.148728394 1.245291289 0.999843564 0.883894924 1 1.161705497  
1.192173979 1.203533946 0.67628606 1.301066774 0.813454714  
YBR147W YBR147W::YBR147W::molecular\_function unknown 1.06136938  
0.882583923 0.886689759 0.846808194 0.860827639 0.914952211

|             |                                                                                                                                                                          |             |             |             |             |             |             |             |            |   |
|-------------|--------------------------------------------------------------------------------------------------------------------------------------------------------------------------|-------------|-------------|-------------|-------------|-------------|-------------|-------------|------------|---|
| 0.735363909 | 0.80288885                                                                                                                                                               |             | 2.199072769 | 1.226951685 | 1.26205133  |             |             |             |            |   |
| 0.958430204 | 1                                                                                                                                                                        | 1.21250146  |             | 1.611646876 | 0.87986542  | 1           |             |             |            |   |
| 1.745845605 |                                                                                                                                                                          | 1.213397322 |             | 0.752090976 | 0.955376227 |             |             |             |            |   |
| 1.187133002 | 0.898777472                                                                                                                                                              | 0.928165867 | 1           | 1.109793523 |             | 2.317531235 |             |             |            |   |
| 1.886509192 | 1.751515902                                                                                                                                                              | 1           | 2.040138022 | 1.868094043 | 3.171821407 |             |             |             |            |   |
| 1.389664417 | 4.162250591                                                                                                                                                              | 1.518331988 |             |             |             |             |             |             |            |   |
| YBR161W     | YBR161W::YBR161W::molecular_function unknown                                                                                                                             |             |             |             | 1           | 1.388216575 |             |             |            |   |
| 1.250533623 | 1.200979533                                                                                                                                                              | 1.395023049 | 1           | 1.153416069 | 1.118199154 |             |             |             |            |   |
| 1.361260507 | 1.06465155                                                                                                                                                               | 1           | 1.154995827 | 0.961076151 | 1.100776467 |             |             |             |            |   |
| 1.272266132 | 1                                                                                                                                                                        | 0.880963979 | 0.796061839 | 0.844346624 | 0.804343485 | 1           |             |             |            |   |
| 1.127114887 | 0.804116487                                                                                                                                                              | 0.891342522 | 1.14695611  | 1           | 0.886806341 |             |             |             |            |   |
| 0.902063912 | 0.626901308                                                                                                                                                              | 1.00911111  | 0.989555749 | 1           | 0.781908879 |             |             |             |            |   |
| 0.81153508  | 1.2900956                                                                                                                                                                | 0.99493032  | 1.38185222  | 1           | 0.900145018 |             |             |             |            |   |
| 0.785487084 | 1.038997051                                                                                                                                                              |             | 1.390611634 | 1.016599476 |             |             |             |             |            |   |
| YBR162WA    | YBR162WA::YSY6::Protein that participates in secretory pathway                                                                                                           |             |             |             | 1           |             |             |             |            |   |
| 0.905495406 | 1.634380652                                                                                                                                                              | 0.920301328 | 1.930019173 | 1           | 0.866992563 |             |             |             |            |   |
| 0.974203071 | 1.696830011                                                                                                                                                              | 1.638295254 | 1           | 1.003054543 | 1.32313249  |             |             |             |            |   |
| 1.468741516 | 1.371548808                                                                                                                                                              | 1           | 0.841564446 | 0.545934875 | 0.471022219 |             |             |             |            |   |
| 1.076222241 | 1                                                                                                                                                                        | 1.529008817 | 1.798300343 | 1.202192399 | 0.885600581 | 1           |             |             |            |   |
| 0.814831132 | 0.931064691                                                                                                                                                              | 0.487316491 | 0.598422943 | 0.965853969 | 1           |             |             |             |            |   |
| 1.071339894 | 1.32882766                                                                                                                                                               | 1.158519328 | 1.960976658 | 2.257143926 | 1           |             |             |             |            |   |
| 0.812324131 |                                                                                                                                                                          | 1.144828706 | 1.643544753 | 1.250700028 | 1.280162299 |             |             |             |            |   |
| YBR164C     | YBR164C::ARL1::Hydrolyzes GTP; myristylated; in soluble fraction. Part of the carboxypeptidase Y pathway.                                                                |             |             |             | 1           | 1.116514591 | 1.286836962 |             |            |   |
| 0.991103038 | 1.573167531                                                                                                                                                              | 1           | 0.932650651 | 0.84750894  | 1.422842769 |             |             |             |            |   |
| 1.349502735 | 1                                                                                                                                                                        | 0.930262785 | 1.15472547  | 1.315980489 | 1.148685503 | 1           |             |             |            |   |
| 1.276184046 | 0.898379966                                                                                                                                                              | 1.030971077 | 1.646776759 | 1           | 1.715693479 |             |             |             |            |   |
| 1.407714756 | 1.881601825                                                                                                                                                              | 1.392097294 | 1           | 0.969885801 | 1.130346882 |             |             |             |            |   |
| 0.700648062 | 0.781583724                                                                                                                                                              | 0.906488306 |             |             | 1.308303008 |             |             |             |            |   |
| 1.117687925 | 2.199830867                                                                                                                                                              | 1           | 1.316186532 | 1.677143169 | 1.071441935 |             |             |             |            |   |
| 1.577477895 | 1.434272122                                                                                                                                                              |             |             |             |             |             |             |             |            |   |
| YDR423C     | "YDR423C::CAD1::Transcriptional activator involved in resistance to 1,10-phenanthroline; member of yeast Jun-family of transcription factors related to mammalian c-jun" |             |             |             | 1           | 0.717666173 | 0.866151413 | 0.729968644 | 0.62648864 | 1 |
| 0.770342902 | 0.811123957                                                                                                                                                              |             | 0.614934169 | 1           | 2.135892058 | 1.912803801 |             |             |            |   |
| 1.040493052 | 1.005106645                                                                                                                                                              | 1           | 2.124520238 | 1.383790768 | 1.322649098 |             |             |             |            |   |
| 1.475953119 | 1                                                                                                                                                                        | 3.091291767 | 2.060554998 | 2.392436178 | 1.679711726 | 1           |             |             |            |   |
| 2.009903489 | 2.641266148                                                                                                                                                              | 2.621305692 | 0.814115257 | 1.018625888 | 1           |             |             |             |            |   |
| 2.917092671 | 3.755202302                                                                                                                                                              | 5.318684408 | 4.173442974 | 1.198564018 | 1           |             |             |             |            |   |
| 3.313354351 | 3.961256136                                                                                                                                                              | 2.101262153 | 0.591285838 | 1.304375189 | 1.053375628 |             |             |             |            |   |
| YDR425W     | YDR425W::YDR425W::molecular_function unknown                                                                                                                             |             |             |             | 1           | 0.749769323 |             |             |            |   |
| 0.860549676 | 0.745358142                                                                                                                                                              | 0.757194952 | 1           | 0.878950234 | 0.841172542 |             |             |             |            |   |
| 0.594758656 | 1                                                                                                                                                                        | 1.294471268 | 1.184097229 | 0.926635192 | 0.90832038  | 1           |             |             |            |   |
| 1.382757527 |                                                                                                                                                                          | 1.643222202 | 1.230049159 | 1           | 1.58101261  | 1.916139812 |             |             |            |   |
| 1.365180516 | 1                                                                                                                                                                        | 1.307681567 | 1.617545204 | 1.164262323 | 0.946040625 |             |             |             |            |   |
| 1.135003172 | 1                                                                                                                                                                        | 1.087909875 | 0.841406075 | 1.319529673 | 0.949484466 |             |             |             |            |   |
| 1.111301411 | 1                                                                                                                                                                        | 1.698865387 | 1.653151096 | 1.276036199 | 0.612119892 |             |             |             |            |   |
| 1.536127217 | 1.139186823                                                                                                                                                              |             |             |             |             |             |             |             |            |   |
| YDR439W     | YDR439W::LRS4::Loss of rDNA silencing                                                                                                                                    |             |             |             |             | 1.01581176  |             |             |            |   |
| 0.860946388 | 1.016394691                                                                                                                                                              | 0.928062626 |             |             |             | 0.875991403 |             |             |            |   |
| 0.696855307 | 0.917040622                                                                                                                                                              | 0.989775405 |             |             |             |             |             |             |            |   |
|             |                                                                                                                                                                          | 1           | 1.373378916 | 1.440768638 | 1.539658159 |             |             |             |            |   |
| 1.203046737 | 1                                                                                                                                                                        |             | 2.481068687 | 2.337606495 | 1.781597628 | 1.407024641 |             |             |            |   |
| 1.028329747 | 1.482261346                                                                                                                                                              | 0.870646963 | 0.747622672 | 0.779972412 | 1.69608372  |             |             |             |            |   |
| YDR441C     | YDR441C::APT2::similar to adenine phosphoribosyltransferase; appears to be a nonfunctional pseudogene                                                                    |             |             |             |             | 1.209123826 | 0.874612232 | 0.924706767 |            |   |
| 0.847787151 |                                                                                                                                                                          | 0.905624575 | 1.022593636 | 0.759213558 | 0.719874069 |             |             |             |            |   |

|             |                                                                                                                                                                                                                      |               |               |                         |
|-------------|----------------------------------------------------------------------------------------------------------------------------------------------------------------------------------------------------------------------|---------------|---------------|-------------------------|
| 1.505834312 | 1.249163771                                                                                                                                                                                                          | 1.15454318    | 1.022064545   | 1.389559016             |
| 0.964523815 | 0.727312455                                                                                                                                                                                                          | 1             |               | 1                       |
| 1.023785223 | 0.820213165                                                                                                                                                                                                          | 1.214814359   | 1.147432418   | 1.040696364             |
| 1.0968546   | 1.283570322                                                                                                                                                                                                          | 1.155649505   | 0.865786746   | 1                       |
| 1.213872763 | 1.243332819                                                                                                                                                                                                          | 0.64557251    | 0.91437938    | 1.144440604             |
| YBR166C     | YBR166C::TYR1::Step of tyrosine biosynthesis pathway 1                                                                                                                                                               |               |               |                         |
| 0.874784877 | 0.826741855                                                                                                                                                                                                          | 0.895508055   | 0.636508076   | 1 0.883116559           |
| 0.831438855 | 0.78502919                                                                                                                                                                                                           | 0.805592471   | 1 1.137924199 | 1.156807855             |
| 0.903686124 | 1                                                                                                                                                                                                                    | 1.126989633   | 2.076084007   | 1.66806841 0.88805306 1 |
| 0.7562659   | 0.382410835                                                                                                                                                                                                          | 0.273561141   | 0.485777092   | 1 1.093141442           |
| 1.246155099 | 1.219851097                                                                                                                                                                                                          | 1.588631655   | 1.371742085   | 1 1.127587862           |
| 0.88124955  | 0.905636961                                                                                                                                                                                                          | 1.276564142   | 0.591331593   | 1 0.931621736           |
| 0.745943362 | 0.988771671                                                                                                                                                                                                          | 0.615233999   | 0.95635333    | 0.674230463             |
| YDR443C     | YDR443C::SSN2::Required for stable association of Srb10p-Srb11p kinase with RNA polymerase holoenzyme; regulates YGP1 expression; component of RNA polymerase II holoenzyme and Kornberg's mediator (SRB) subcomplex |               |               |                         |
| 0.96902287  | 0.857529978                                                                                                                                                                                                          | 1.265741238   | 0.784154168   | 1.224046053             |
| 1.442175526 | 0.838712361                                                                                                                                                                                                          | 0.74713266    | 1.356336      | 1.140218873             |
| 0.571428765 | 1.194366608                                                                                                                                                                                                          |               | 1.201786985   | 0.737160282 1           |
| 0.859802491 | 1                                                                                                                                                                                                                    | 0.982525569   | 0.823406278   | 1.16751955              |
| 0.808118029 | 1 1.378939207                                                                                                                                                                                                        | 1.010886151   | 1.378126872   | 1.212999861             |
| 0.856392746 | 1 0.787121454                                                                                                                                                                                                        | 0.963136363   | 0.872809197   | 0.686553518             |
| 0.74762894  | 0.770549116                                                                                                                                                                                                          |               |               |                         |
| YBR168W     | YBR168W::YBR168W::molecular_function unknown 1 1.245509508                                                                                                                                                           |               |               |                         |
| 1.195414775 | 1.284027094                                                                                                                                                                                                          | 1.066254061   | 1 1.211972169 | 1.200648361             |
| 1.305426922 | 1.150658684                                                                                                                                                                                                          | 1 1.165637554 | 1.254981847   | 1.177452557             |
| 1.348298128 | 1                                                                                                                                                                                                                    |               | 1.243050209   | 1 1.574488922           |
| 0.918696727 | 1.275399644                                                                                                                                                                                                          |               | 0.764644889   | 0.953535448 0.982036875 |
| 0.876477705 | 0.91572652                                                                                                                                                                                                           | 1 0.827422383 | 0.994553107   | 1.259277321             |
| 1.170502354 | 1.17606343                                                                                                                                                                                                           | 1 1.155140957 | 1.128215399   | 1.239487271             |
| 0.41724772  | 1.358846028                                                                                                                                                                                                          | 0.916778372   |               |                         |
| YDR445C     | YDR445C::YDR445C::molecular_function unknown 0.743697314                                                                                                                                                             |               |               |                         |
| 1.073905395 | 0.781584055                                                                                                                                                                                                          | 1.060223373   | 0.707065142   | 0.665619499             |
| 1.127513692 | 0.687210231                                                                                                                                                                                                          | 0.76684485    | 1.121823335   | 1.105278531 1           |
| 0.968822361 | 0.858014895                                                                                                                                                                                                          | 1.080956303   | 1             | 2.232289818             |
| 1.530280491 | 0.620705102                                                                                                                                                                                                          | 1 0.967616016 | 0.980629777   | 0.648137709             |
| 0.725646289 | 0.946794951                                                                                                                                                                                                          | 1 1.246957102 | 1.491465364   | 1.217579857             |
| 1.30574882  | 2.121299487                                                                                                                                                                                                          | 1 0.932003471 | 1.264725899   | 0.887223938             |
| 1.227766455 | 0.924198816                                                                                                                                                                                                          | 1.558610695   |               |                         |
| YBR170C     | YBR170C::NPL4::Nuclear pore or nuclear pore-associated protein required for nuclear membrane integrity and nuclear transport 1                                                                                       |               |               |                         |
| 0.784791231 | 0.855931579                                                                                                                                                                                                          | 1.143599575   | 0.720425114   | 1 1.009210899           |
| 1.084119832 | 0.964657741                                                                                                                                                                                                          | 0.819973212   | 1 1.013372842 | 1.138974272             |
| 0.945537324 | 1.020054094                                                                                                                                                                                                          | 1 1.034157043 | 1.345234578   | 1.151759557 1           |
| 1.854510365 | 1.578670422                                                                                                                                                                                                          | 1.855612191   | 1.954229955   | 1 1.168595826           |
| 1.522648804 | 1.520897364                                                                                                                                                                                                          | 1.088713335   | 1.018088459   | 1 1.23131679            |
| 1.17210369  | 1.516903128                                                                                                                                                                                                          | 1.051843344   | 0.846611384   | 1 1.143286466           |
| 1.024340646 | 1.053064397                                                                                                                                                                                                          | 0.583991699   | 0.936946711   |                         |
| YDR447C     | YDR447C::RPS17B::Homology to rat ribosomal protein S17 1                                                                                                                                                             |               |               |                         |
| 0.840926282 | 0.802707961                                                                                                                                                                                                          | 0.635594423   | 1.352867651   | 1 0.658653351           |
| 0.601235383 | 0.958473883                                                                                                                                                                                                          | 0.909860219   | 1 0.561458498 | 0.626184911             |
| 0.608162285 | 0.737867906                                                                                                                                                                                                          | 1 0.633069708 | 0.305658963   | 0.166394453             |
| 0.491369774 | 1 1.942865307                                                                                                                                                                                                        | 1.126384792   | 0.685527331   | 0.915264523 1           |
| 1.175537933 | 1.110210019                                                                                                                                                                                                          | 1.066766314   | 1.307467073   | 1 1.361346541           |
| 1.817311199 | 1.010668692                                                                                                                                                                                                          | 0.687480291   | 1.852702978   | 1 1.192734939           |
| 1.41374392  | 0.923328167                                                                                                                                                                                                          | 1.425981949   | 1.30959634    | 1.188221762             |

YBR184W YBR184W::YBR184W::molecular\_function unknown 1 1.487121751  
1.666183091 1.546272821 1.626169682 1 1.486068176 1.542309627  
1.509209166 1.482274661 1 1.73039492 1.343266249 1.134067279  
1.824872147 1  
1.248500021 1.132192048  
1 1.157163538 1.773418447 1.199604884  
YDR449C YDR449C::UTP6::part of small (ribosomal) subunit (SSU) processosome  
(contains U3 snoRNA) 1 0.562689657 0.575559682 0.611506655 0.789829642 1  
0.52678087 0.531070064 0.725386357 0.721885057 1 0.320991265  
0.266980812 0.251861232 0.661213791 1 0.140714555 0.178642669  
0.167931929 0.543761665 1 0.279223385 0.36898207 0.489593686  
0.790142869 1 0.510178098 0.465830519 0.382904312 0.530057443  
0.753275171 1 0.530083883 0.890404374 0.518249067 1.074009613  
1.483628028 1 0.559710627 0.801923297 0.892439491 0.899702027  
0.63594053 0.98245011  
YBR186W YBR186W::PCH2::Pachytene CCheckpoint 1 1.747979209 1.448514473  
1.233490106 1.689275556 1 1.246216183 1.109058103 1.647363138  
1.615186257 1 1.095615447 0.954821895 1.250367453 1.149320994 1  
0.732666749 0.575796049 0.490346063 1.010891558 1 1.13493123  
0.741687767 0.979201916 0.805350875 0.961798544 1.197046917 1  
0.800812337 0.948759055 0.707405664 0.759554836 1.60545296 1  
0.669313608 0.761123178 1.410515803 0.875324731 0.76354411  
YDR463W YDR463W::STP1::Involved in pre-tRNA splicing and in uptake of  
branched-chain amino acids 0.885295331 0.871195754 1.015276559  
0.772406516 0.968582414 0.974264861 0.776438313 0.735981422  
1.115209614 1.065120987 0.898627247 1.048497199 1 0.726145276  
0.476269267 0.659481079 1 1.057927658 1.017719438  
1.351817545 0.906161268 0.861495326 0.796004636 1.021939257 1  
0.816357151 1.042814387 0.898408419 0.881533499 1.095968807 1  
0.893590327 0.923849359 0.986865158 0.787478079 0.963820026 0.808200933  
YBR188C YBR188C::NTC20::Prp19p (NineTeen)-associated Complex protein 1  
1.660478809 1.676212291 1.37355027 1.790718407 1 1.414542686  
1.416995847 1.491469387 1.482864047 1 1.919416587 1.434768331  
1.786507087 1.447152981 1.00166848 0.848559461 1  
0.691281203 1 0.879716921 0.895372144 0.745309313  
0.88046316 1.005591244 1 0.931393797 1.040678188 1.087824651  
1.508800787 1 1.0152489 1.115937841 1.164832752 1.462193016  
1.267960958 1.013972585  
YDR465C YDR465C::RMT2::Protein Arginine Methyltransferase; R = arginine; MT  
= methyltransferase 1 0.69753723 0.537198785 0.53880396 0.613149434 1  
0.539011441 0.402847948 0.642957385 0.717302258 1 0.572797706  
0.28707077 0.175391804 0.745737524 1 0.385675124 0.106542847  
0.097183045 0.283457766 1 0.854867318 0.233590868 0.180875584  
0.468663513 1 0.930031236 0.721389908 0.691201937 0.978143479  
0.932148398 1 0.972648637 0.685679828 0.562712576 0.936454877  
1.072000646 1 0.777579207 0.577494829 0.681547727 0.773751084  
0.373955412 0.646210491  
YBR190W YBR190W::YBR190W::molecular\_function unknown 1 1.709041673  
1.545782515 1.433934302 1.665597976 1 1.505238122 1.316927343  
1.432909601 1.525648415 1 1.205281881 1.174499505 1.172206923  
1.377189165 1  
0.540957722 0.481369725 0.60821625 0.659297407 0.608570571 1  
1.074326904 1.052919524 0.920256442 0.558092955 1.039363009 1  
1.491077988 1.246194417 0.986380497 1.569949747 1.37787116 1.23112736  
YBR192W YBR192W::RIM2::Protein of the mitochondrial carrier (MCF) family  
that is required for respiration 1 1.164615062 1.253443855 1.341850436  
1.500165786 1 1.303360859 1.386768732 1.431999414 1.451721255 1

|             |                                                                                                                                                            |             |             |             |             |
|-------------|------------------------------------------------------------------------------------------------------------------------------------------------------------|-------------|-------------|-------------|-------------|
| 1.159183791 | 1.009456538                                                                                                                                                | 1.415634517 | 1.293033085 | 1           | 0.897977729 |
| 0.624299449 | 1                                                                                                                                                          |             |             | 1           | 0.761928108 |
| 0.869656593 | 0.8693727                                                                                                                                                  | 1.006901482 | 1.117058872 | 1           | 0.720241612 |
| 0.854515613 | 0.776556994                                                                                                                                                | 0.959810556 | 1           | 0.970545919 | 0.597707722 |
| 0.909294696 | 1.009861642                                                                                                                                                | 1.110291238 |             |             |             |
| YBR194W     | YBR194W::YBR194W::molecular_function                                                                                                                       | unknown     |             | 1           | 1.172741979 |
| 1.743709459 | 1.04981472                                                                                                                                                 | 1.917954741 | 1           | 1.056455542 | 1.037879679 |
| 1.755190585 | 1.699213318                                                                                                                                                | 1           | 1.017487012 | 1.436217999 | 2.421486337 |
| 1.597836454 | 1                                                                                                                                                          | 1.095562054 | 1.000446765 |             | 1.563277771 |
| 1.793221729 | 2.421758885                                                                                                                                                | 2.373800836 | 0.897566401 | 1           | 1.155092205 |
| 1.295042991 | 1.000635802                                                                                                                                                | 0.955244074 | 1.075306801 |             | 0.82596571  |
| 1.248668704 | 1.487171503                                                                                                                                                |             | 1           | 1.062359675 | 1.34387816  |
| 1.511551545 | 0.899943575                                                                                                                                                | 1.609206181 | 1.357217158 |             |             |
| YBR208C     | "YBR208C::DUR1,2::Urea amidolyase (contains urea carboxylase and allophanate hydrolase)"                                                                   |             |             |             |             |
|             |                                                                                                                                                            | 0.895145647 |             | 0.971668894 |             |
| 0.919345748 | 0.908936266                                                                                                                                                |             |             | 1.064563642 |             |
|             | 0.739910845                                                                                                                                                |             |             | 0.194596992 | 1           |
| 1.006474738 | 0.979734799                                                                                                                                                | 1.049404119 | 1.139063602 | 1.034348521 | 1           |
| 0.656529124 | 0.808025174                                                                                                                                                | 0.736267504 | 0.743500884 | 1           | 0.702287078 |
| 0.677461809 | 0.875569166                                                                                                                                                | 0.537471527 | 0.906976663 | 0.823962171 |             |
| YMR059W     | YMR059W::SEN15::Trna splicing endonuclease 15kDa subunit                                                                                                   |             |             |             |             |
| 1.005961444 | 0.880306316                                                                                                                                                |             | 0.985821753 |             | 0.706259633 |
| 0.930135989 | 0.972635442                                                                                                                                                |             | 0.810184693 | 0.692804605 | 1.004966777 |
| 0.872279172 | 1                                                                                                                                                          | 1.133662234 |             | 1.629284503 | 1.09954443  |
| 0.584032389 | 1.070519229                                                                                                                                                |             | 1           | 1.041501614 | 1.050209352 |
| 0.940137879 | 0.912636028                                                                                                                                                | 1.199404148 | 1           | 0.759425245 | 1.245939067 |
| 0.897414885 | 1.092999733                                                                                                                                                | 1.906313172 | 1           | 1.116888708 | 1.411435145 |
| 1.012858631 | 0.957377867                                                                                                                                                | 0.945012076 | 0.93078828  |             |             |
| YMR063W     | YMR063W::RIM9::Regulator of IME2 (RIM)<br>required for IME1 expression                                                                                     |             |             |             |             |
| 1           | 0.780120565                                                                                                                                                | 0.559128166 |             | 0.465366078 | 1           |
| 0.814340249 |                                                                                                                                                            |             |             |             |             |
| 0.94451096  | 0.499177302                                                                                                                                                | 0.523935302 | 1           | 1.016206958 | 0.708422672 |
| 0.247899355 | 1.023131707                                                                                                                                                | 1           | 0.780541432 |             | 0.679945666 |
|             | 0.978665163                                                                                                                                                | 1           | 0.950698088 | 0.689415554 | 1.057705946 |
| 1.093611439 | 1.040058206                                                                                                                                                | 1           | 0.904736953 | 0.788991999 | 0.762314179 |
| 1.049436975 | 0.593369652                                                                                                                                                | 1           | 0.592470763 | 0.685106745 | 0.891269176 |
| 0.419246375 | 0.659115558                                                                                                                                                | 0.762668497 |             |             |             |
| YMR065W     | YMR065W::KAR5::appears to be required for the completion of nuclear membrane fusion and may play a role in the organization of the membrane fusion complex |             |             |             |             |
|             |                                                                                                                                                            | 0.982566999 | 1.010131594 | 1.096901233 |             |
| 1.175257292 | 1.127513692                                                                                                                                                |             | 1.103153306 |             | 0.848378929 |
| 1.122900339 |                                                                                                                                                            |             |             |             | 1           |
| 0.643771978 | 0.560863405                                                                                                                                                | 0.642717523 | 1.201721765 | 1           | 1.083902923 |
| 1.301403562 | 1.758370957                                                                                                                                                | 0.425711437 |             | 0.970071877 | 1.032689903 |
| 0.961830374 | 1.024819675                                                                                                                                                | 0.857357338 | 1           | 0.931416014 | 0.981777513 |
| 1.571617314 |                                                                                                                                                            | 1           | 0.968857691 |             | 1.812633659 |
| 0.529634272 |                                                                                                                                                            |             |             |             |             |
| 1.108781021 | 0.914151482                                                                                                                                                |             |             |             |             |
| YMR080C     | YMR080C::NAM7::Involved in mRNA degradation                                                                                                                |             |             | 1           | 0.834577718 |
| 0.588858541 | 0.87700647                                                                                                                                                 | 0.540357549 | 1           | 0.826676696 | 0.860136241 |
| 0.554698718 | 0.525661416                                                                                                                                                | 1           | 0.872769267 | 0.685301023 | 0.313040322 |
| 0.852635786 | 1                                                                                                                                                          | 1.051594432 | 0.629836458 | 0.974289783 | 0.467500424 |
|             |                                                                                                                                                            |             |             |             | 1           |
| 0.864997003 | 0.516478581                                                                                                                                                | 0.542899051 | 0.652445633 | 1           | 0.869826604 |
| 0.705902674 | 0.942584725                                                                                                                                                | 1.069362203 | 0.854531867 | 1           | 0.820812244 |
| 0.443537996 | 0.517875936                                                                                                                                                | 0.720123046 | 0.45122791  | 1           | 0.791229887 |
| 0.773085941 | 0.978565526                                                                                                                                                | 0.645163899 | 0.685883369 | 0.553394393 |             |
| YMR082C     | YMR082C::YMR082C::molecular_function                                                                                                                       | unknown     |             |             |             |
| 1.025959491 |                                                                                                                                                            |             |             |             | 1.399738768 |
| 0.751387946 | 0.748926571                                                                                                                                                |             | 0.314946575 |             |             |
|             | 1                                                                                                                                                          |             |             |             |             |
|             |                                                                                                                                                            | 1.184700423 |             | 0.962750434 | 0.972804927 |
|             |                                                                                                                                                            |             |             | 1           |             |

|         |                                                                                                                                          |             |             |             |             |             |             |
|---------|------------------------------------------------------------------------------------------------------------------------------------------|-------------|-------------|-------------|-------------|-------------|-------------|
|         | 2.072635481                                                                                                                              | 1.87196653  |             | 2.060968109 |             | 1           |             |
|         | 0.878873838                                                                                                                              |             | 0.78018096  |             |             |             |             |
| YMR086W | YMR086W::YMR086W::molecular_function unknown                                                                                             |             |             |             | 1           | 0.686499291 |             |
|         | 0.865087817                                                                                                                              | 1.008365095 | 0.721765298 | 1           |             | 1.465194347 | 0.861507575 |
|         | 0.830362525                                                                                                                              | 1           | 0.9822913   | 1.112706531 | 0.735537508 | 0.917278435 | 1           |
|         | 0.739168825                                                                                                                              | 0.497854559 | 0.661460151 |             | 1           | 0.965344839 |             |
|         | 0.767201578                                                                                                                              | 1           | 0.848265152 | 0.912142058 | 0.988365066 | 0.893886305 |             |
|         | 0.829031672                                                                                                                              | 1           | 1.160706271 | 0.819215215 | 0.927751005 | 1.207075009 |             |
|         | 0.555423913                                                                                                                              | 1           | 0.920540651 | 0.845836907 | 1.075174586 | 0.658130453 |             |
|         | 0.865217319                                                                                                                              | 0.765295387 |             |             |             |             |             |
| YMR088C | YMR088C::YMR088C::molecular_function unknown                                                                                             |             |             |             | 1           | 1.225425939 |             |
|         | 0.868548288                                                                                                                              | 1.078406269 | 0.785139036 | 1           |             | 1.19833673  | 0.93349354  |
|         | 1.087991805                                                                                                                              | 1           | 1.05145263  | 0.892609313 | 0.839280824 | 1.068915745 | 1           |
|         | 1.001048164                                                                                                                              | 0.619191303 | 0.870670228 | 0.69824372  | 1           | 0.733726351 |             |
|         | 0.720689429                                                                                                                              | 0.355007935 | 0.366621902 | 1           | 0.951065973 | 0.910312518 |             |
|         | 1.226714587                                                                                                                              | 1.497577897 | 0.874574315 | 1           | 0.895818404 | 0.806747062 |             |
|         | 0.806274599                                                                                                                              | 0.911308811 | 0.495638188 | 1           | 0.858437626 | 0.670881039 |             |
|         | 0.866930569                                                                                                                              | 0.783438052 | 0.503796176 | 0.788061579 |             |             |             |
| YMR090W | YMR090W::YMR090W::molecular_function unknown                                                                                             |             |             |             | 1           | 0.678878012 |             |
|         | 1.061637668                                                                                                                              | 1.411453647 | 1.880285447 | 1           | 1.034251975 | 1.358615761 |             |
|         | 2.018587009                                                                                                                              | 2.624714889 | 1           | 1.55906124  | 2.866018229 | 6.805380709 |             |
|         | 2.618959111                                                                                                                              | 1           | 4.882774712 | 8.512533645 | 12.47507197 | 9.112295923 | 1           |
|         | 2.57566579                                                                                                                               | 4.640172669 | 8.240750099 | 3.952759008 | 1           | 1.157451989 |             |
|         | 2.486368526                                                                                                                              | 2.929836655 | 1.69748773  | 1.299864902 | 1           | 1.40182002  |             |
|         | 2.5573338                                                                                                                                | 5.050652982 | 4.569205137 | 1.422656682 | 1           | 1.583075588 |             |
|         | 2.253772047                                                                                                                              | 0.897774146 | 2.042821665 | 1.047246286 |             |             |             |
| YMR092C | YMR092C::AIP1::Protein localizes to actin cortical patches. Probable binding site on actin lies on front surface of subdomain 3 and 4. 1 |             |             |             |             |             |             |
|         | 0.909522515                                                                                                                              | 0.862190055 | 1.283536799 | 0.780231266 | 1           | 1.142074577 |             |
|         | 1.297933201                                                                                                                              | 0.992287135 | 0.993833043 | 1           | 0.909073941 | 1.219580163 |             |
|         | 0.967205454                                                                                                                              | 1.036657058 | 1           | 1.439456009 | 1.206871075 | 1.556233492 |             |
|         | 1.115188683                                                                                                                              | 1           | 1.654517526 | 1.290410545 | 1.322319203 | 1           |             |
|         | 1.062190342                                                                                                                              | 1.433548004 | 1.650369822 | 1.072457318 | 0.952585366 | 1           |             |
|         | 1.092006925                                                                                                                              | 1.223989415 | 1.053209129 | 0.950419275 | 0.801473602 | 1           |             |
|         | 1.582778349                                                                                                                              | 1.406255238 | 1.433899822 | 1.044277352 | 1.453645726 | 0.823086558 |             |
| YMR106C | "YMR106C::YKU80::Exhibits DNA binding activity on its own, associates with Hdf1p to form major DNA end-binding complex" 1                |             |             |             |             |             |             |
|         | 1.125771438                                                                                                                              | 1.171045345 | 1.083755129 | 1           | 1.320401127 | 1.370847912 |             |
|         | 1                                                                                                                                        | 1.278005271 | 1.19454969  | 0.881656926 | 1.274761458 | 1           |             |
|         | 0.909582249                                                                                                                              |             | 0.678447598 | 0.842856881 |             |             | 1           |
|         | 1.081940324                                                                                                                              | 1.179906973 | 1.145821997 | 1.068510135 | 1.089156138 | 1           |             |
|         | 1.023011228                                                                                                                              | 0.959856836 | 0.840461582 | 1.214200881 | 0.819169415 | 1           |             |
|         | 0.840445153                                                                                                                              | 0.928683656 | 1.025021226 | 0.949649585 | 0.98557161  | 0.938668951 |             |
| YBR210W | YBR210W::YBR210W::molecular_function unknown                                                                                             |             |             |             | 1           | 1.187893239 |             |
|         | 1.324839584                                                                                                                              | 0.935480678 | 1.482550717 | 1           | 0.943133735 | 0.920352662 |             |
|         | 1.444647919                                                                                                                              | 1.26520781  | 1           | 1.031844719 | 1.337549182 | 1.521143184 |             |
|         | 1.314504913                                                                                                                              | 1           | 1.105890843 | 0.989817339 | 0.693305756 | 1.313980431 | 1           |
|         | 1.613775575                                                                                                                              | 1.596631139 | 1.548319131 | 1.314658057 | 1           | 1.046545253 |             |
|         | 1.111286281                                                                                                                              | 0.761255104 | 0.900203118 | 0.944730967 |             | 0.969422945 |             |
|         | 1.330209484                                                                                                                              | 1.115460273 | 1.448375674 |             | 1           | 1.270782135 | 1.527605221 |
|         | 1.347239635                                                                                                                              | 1.507550808 | 1.689399699 | 1.491187628 |             |             |             |
| YBR212W | YBR212W::NGR1::negative growth regulatory protein                                                                                        |             |             |             | 1           |             |             |
|         | 1.149367839                                                                                                                              | 1.017611192 | 1.218691688 | 0.674327354 | 1           | 1.133990553 |             |
|         | 1.185617244                                                                                                                              | 0.770756311 | 0.736367862 | 1           | 1.674837137 | 1.341635018 |             |
|         | 0.980388087                                                                                                                              | 0.897408244 | 1           | 1.553822026 | 1.077519167 | 0.576031155 | 1           |
|         | 1.486823872                                                                                                                              | 1.318045535 | 1.149156545 | 0.898491471 |             |             |             |
|         | 1.383136252                                                                                                                              | 0.930772779 |             | 0.792283954 | 0.779069035 |             |             |

|         |                                                                                        |             |             |             |             |             |             |  |
|---------|----------------------------------------------------------------------------------------|-------------|-------------|-------------|-------------|-------------|-------------|--|
|         | 0.387905204                                                                            | 1           | 0.948398443 |             | 0.821185471 | 0.984984348 |             |  |
|         | 0.720638564                                                                            |             |             |             |             |             |             |  |
| YBR214W | "YBR214W::SDS24::Similar to S. pombe SDS23, suppresses DIS2, localized to the nucleus" |             |             |             |             |             |             |  |
|         | 1                                                                                      | 1.370708409 | 1.559151311 | 0.873337014 |             |             |             |  |
|         | 0.58738945                                                                             | 1           | 1.77716779  | 1.903157806 | 0.969462495 | 0.663706844 | 1           |  |
|         | 3.275996613                                                                            | 3.458069771 | 2.857051839 | 1.073728825 | 1           | 3.574428036 |             |  |
|         | 3.238448089                                                                            | 3.635937252 | 1.862295479 | 1           | 1.641524633 | 1.290378133 |             |  |
|         | 1.309971483                                                                            | 1.010479856 | 1           | 1.126399468 | 1.376532388 | 1.296214968 |             |  |
|         | 1.081219123                                                                            | 1.085026222 | 1           | 1.252387498 | 1.234508386 | 1.700818381 |             |  |
|         | 1.410914377                                                                            | 1.350020041 | 1           | 1.475354526 | 1.291447645 | 1.215927791 |             |  |
|         | 1.047508368                                                                            | 1.811574182 | 0.922032049 |             |             |             |             |  |
| YBR216C | YBR216C::molecular_function unknown                                                    |             |             |             |             |             |             |  |
|         | 1                                                                                      | 1.229678336 |             |             |             |             |             |  |
|         | 1.226873139                                                                            | 1.309579081 | 1.17989137  | 1           | 1.200621102 | 1.29287641  |             |  |
|         | 1.117997582                                                                            | 0.990216572 | 1           | 1.482786769 | 1.331900709 | 0.835166797 |             |  |
|         | 1.330420814                                                                            | 1           | 1.318075439 | 0.990613096 | 0.750786148 | 1           |             |  |
|         | 1.114810213                                                                            | 1.177437526 | 0.646454399 | 0.431194782 | 1           | 1.129920689 |             |  |
|         | 1.102376112                                                                            | 1.059399867 | 1.162360716 | 1.083485728 | 1           | 0.924503835 |             |  |
|         | 0.832741528                                                                            | 0.852237267 | 0.816293292 | 1           | 1.056368072 | 0.99157202  |             |  |
|         | 0.610661919                                                                            | 0.975933772 | 1.029733823 |             |             |             |             |  |
| YBR232C | YBR232C::YBR232C::molecular_function unknown                                           |             |             |             |             |             |             |  |
|         | 1                                                                                      | 1.154734565 |             |             |             |             |             |  |
|         | 1.382047345                                                                            | 1.202049228 | 1.082423564 | 1           | 1.204806746 | 1.239330203 |             |  |
|         | 1.313204866                                                                            | 1.206557477 | 1           | 1.299312184 | 1.400574102 | 1.3045102   |             |  |
|         | 1.331538661                                                                            | 1           | 0.873584596 | 0.850487402 | 1.123452272 | 1.209327115 | 1           |  |
|         | 0.850374206                                                                            | 0.854227419 | 0.579481929 | 1           | 0.873293277 | 0.773092636 |             |  |
|         | 0.617994138                                                                            | 0.660855455 | 0.712201714 | 1           | 0.991810585 | 1.059356921 |             |  |
|         | 0.699747528                                                                            | 0.953945748 | 1.422656682 | 1           | 1.16094489  | 1.330555067 |             |  |
|         | 1.158888966                                                                            | 1.443028511 | 1.032360714 |             |             |             |             |  |
| YBR234C | "YBR234C::ARC40::Arp2/3 complex subunit, 40 kilodalton"                                |             |             |             |             |             |             |  |
|         | 1                                                                                      |             |             |             |             |             |             |  |
|         | 1.693451834                                                                            | 1.370734566 | 1.461047036 | 1.232122651 | 1           | 1.459367771 |             |  |
|         | 1.791670099                                                                            | 1.41962932  | 1.374339394 | 1           | 1.36420993  | 1.258588531 |             |  |
|         | 1.942270169                                                                            | 1.287619678 | 1           | 1.155271598 | 0.868327564 | 0.854219138 | 1           |  |
|         | 1.137846362                                                                            | 1.868763087 | 1.549236324 | 1           | 1.021235888 | 1.231170748 |             |  |
|         | 1.280573822                                                                            | 1.057163817 | 1.043334783 | 1           | 0.963178667 | 1.102962463 |             |  |
|         | 1.238991845                                                                            | 0.854657521 | 0.992363543 | 1           | 1.063531408 | 1.180543429 |             |  |
|         | 1.237120565                                                                            | 1.056676845 | 1.210304306 | 0.685613585 |             |             |             |  |
| YBR236C | YBR236C::ABD1::RNA (guanine-7-)methyltransferase (cap methyltransferase)               |             |             |             |             |             |             |  |
|         | 1                                                                                      | 1.459370301 | 1.306922413 | 1.478996013 | 1.525832836 | 1           |             |  |
|         | 1.275558149                                                                            | 1.270054931 | 1.338403486 | 1.357371171 | 1           | 1.441176281 |             |  |
|         | 1.291915851                                                                            | 1.373192959 | 1.520196822 | 1           | 0.935278832 | 0.679322947 |             |  |
|         | 0.763514134                                                                            | 0.904738402 | 1           | 1.072589267 | 1.340244249 | 0.917027038 |             |  |
|         | 1.076958767                                                                            | 1           | 1.057494962 | 1.06066742  | 0.961728044 | 1.077343422 |             |  |
|         | 0.932361214                                                                            | 1           | 0.991122652 | 1.045316299 | 0.988306648 | 0.901571945 |             |  |
|         | 0.896705326                                                                            | 1           | 1.244635501 | 1.138868118 | 0.986653257 | 1.023703668 |             |  |
|         | 1.095662317                                                                            | 1.215366122 |             |             |             |             |             |  |
| YBR238C | YBR238C::YBR238C::molecular_function unknown                                           |             |             |             |             |             |             |  |
|         | 1                                                                                      | 1.334435136 |             |             |             |             |             |  |
|         | 0.923379227                                                                            | 1.396954526 | 0.849766201 | 1           | 1.381406321 | 1.210236281 |             |  |
|         | 0.9320554                                                                              | 0.790773162 | 1           | 1.367123063 | 0.64321552  | 0.616812847 |             |  |
|         | 1.24765907                                                                             |             | 1.212546034 | 0.555620815 | 1           |             |             |  |
|         | 1                                                                                      | 0.626410826 | 0.37936616  | 0.415384689 | 0.996555295 | 0.432054724 | 1           |  |
|         | 0.61917962                                                                             | 0.3319661   | 1.039678031 | 0.432944495 | 1           | 0.59173579  |             |  |
|         | 0.448341202                                                                            | 0.842423404 | 0.386415008 | 0.601553668 |             |             |             |  |
| YBR240C | YBR240C::THI2::Transcriptional activator of thiamine biosynthetic genes                |             |             |             |             |             |             |  |
|         | 1                                                                                      | 1.46480564  | 1.39930679  | 1.499760316 | 1.501322575 | 1           | 1.468738184 |  |
|         | 1.332450876                                                                            | 1.400206481 | 1.566985634 | 1           | 1.12518819  | 1.271545444 |             |  |
|         | 1.395669761                                                                            | 1.786013569 | 0.694314128 | 0.893168773 | 0.998440739 |             |             |  |
|         | 0.78392042                                                                             |             |             | 1           | 0.864989228 | 0.899866778 |             |  |
|         | 1.046272868                                                                            | 1.083044972 | 1.014510266 | 1           | 0.751578146 | 0.798419195 |             |  |



0.828416697 0.833885262 0.797759822 1 0.911755277 0.882604669  
 0.892439538 0.677606969 1.169707323 1.106788787  
 YBR242W YBR242W::YBR242W::molecular\_function unknown 1 1.458455679  
 1.325149843 1.075426981 1.478437838 1 1.066730428 0.990678619  
 1.445871676 1.484868342 1 0.985047681 0.911306613 1.13042674  
 1.233192155 1 0.974728835 0.514306197 0.977705234 1  
 1.214059101 1.358950279 0.724856092 0.767861424 1 0.821189231  
 0.666076512 0.533393896 0.752434356 0.84415377 1 0.74203535  
 0.388784669 0.940544362 1.527368008 1 0.833654861 0.765537514  
 0.991694748 1.292106148 0.865290896 1.161077402  
 YMR108W YMR108W::ILV2::acetolactate synthase 1 0.896049446  
 0.679986107 0.950192339 0.51995047 1 0.86271532 0.893539281  
 0.608437119 0.573871553 1 0.924310792 0.681108748 0.284496383  
 0.709214038 1 0.633535705 0.327395567 0.3224347 0.430244279 1  
 0.716747333 0.270911493 0.154929455 0.575291769 1 1.078460442  
 0.750119003 0.980611704 1.419378688 0.952333921 1 0.946231389  
 0.40932232 0.229439146 0.328709991 0.407700457 1 0.792258241  
 0.48527563 0.67910014 0.979115084 0.581290196 0.599802442  
 YMR110C YMR110C::YMR110C::molecular\_function unknown 1 1.143166776  
 1.353305064 1.526821578 0.960807924 1 1.562438736 1.619138918  
 1.362079069 1.132728174 1 1.256538107 1.60432868 1.778507023  
 1.149448494 1 2.257432085 2.85304911 2.392493457 1.81328427 1  
 2.111302274 1.82726565 1.721533369 2.04883508 1 1.127964233  
 1.411206728 1.490345905 1.110784403 0.992627983 1 0.866114584  
 0.755122218 0.912613725 0.967017272 0.927234983 1 1.289852463  
 1.031001132 1.217162648 0.981182428 1.832840461 1.108540012  
 YMR112C YMR112C::MED11::14 Kd mediator subunit of RNA polymerase II  
 holoenzyme 1 0.769276317 1.498861387 0.869884455 1.712315818 1  
 0.80965592 0.812075879 1.632680764 1.317144777 1 1.092128897  
 1.304760155 1.405695355 1.203731755 1 1.094814187 0.627689041  
 0.89773963 1.588546394 1 1.486041935 2.449673285 2.368378068  
 1.459078447 1 0.767976372 1.033612808 0.510458017 0.47773718  
 0.858529979 1 1.394006899 1.944976622 1.219481183 1.644841044  
 2.936248389 1 1.183003726 1.720948395 1.398441963 2.165538932  
 1.864845961 1.125176811  
 YMR114C YMR114C::YMR114C::molecular\_function unknown 1 0.787934941  
 1.209685395 1.323316081 1 1.064428903 1.227136857 1.388168971  
 1.252849625 1 1.175036987 1.634193288 1.966584877 1.458331161 1  
 1.656337086 1.224344908 2.143565659 1.985937425 1 1.581503355  
 2.241980896 2.450745713 1.421797019 1 0.930574505 1.427306792  
 0.914784212 0.698414954 1.062638133 1 1.732576132 2.206181252  
 1.704566403 2.347985622 2.540419866 1 1.440410897 1.632082937  
 1.241025291 1.497502807 1.922880248 1.418510884  
 YMR118C YMR118C::YMR118C::molecular\_function unknown 1 1.495653227  
 1.225324077 1.29281865 1.218456979 1 1.236820491 1.222156654  
 1.463475632 1.353368633 1 1.103697281 1.086267008 1.058638385  
 1.464841592 1 0.674976736 0.78162181 1.154428509 1  
 1.077682491 1.035125618 1 1.1577813 0.975436984  
 1.488703066 1.081917087 1 1.020964941 1.287419552 0.834118017  
 1.091726478 1.138271648 1 0.893929848 0.847856281 0.853116971  
 0.960473772 1.05456274 1.379107842  
 YMR133W "YMR133W::REC114::meiosis-specific recombination gene; dispensable  
 for mitotic recombination and axial elements in meiosis but required for  
 synaptonemal complexes, meiotic recombination, and spore viability; classified  
 as an early recombination gene" 1 1.976652092 1.750173436 1.957010356  
 1.696169694 1 1.547807188 1.743153706 1.741654293 1  
 1.706515163 2.07488623 2.681254079 1 2.269728452

|         |                                                                                                                                                      |             |             |             |             |             |             |             |
|---------|------------------------------------------------------------------------------------------------------------------------------------------------------|-------------|-------------|-------------|-------------|-------------|-------------|-------------|
|         | 2.386930746                                                                                                                                          | 1.155242105 |             | 0.349250114 |             |             | 1           |             |
|         | 1.162625207                                                                                                                                          | 1.442677811 | 1.548679492 | 1.341613219 | 1.28525457  |             | 1           |             |
|         | 0.719654608                                                                                                                                          | 1.060323594 | 0.813076071 | 0.901744342 | 0.855247784 |             | 1           |             |
|         | 1.071588456                                                                                                                                          |             | 1.041799545 | 1.063975986 | 1.393715988 | 1.20660989  |             |             |
| YMR135C | YMR135C::DCR1::Dose-dependent Cell cycle Regulator                                                                                                   |             |             |             |             |             | 1           |             |
|         | 1.065144123                                                                                                                                          | 1.254980171 | 1.244618166 | 1.109028461 | 1           | 1.232626804 |             |             |
|         | 1.389339366                                                                                                                                          | 1.329324349 | 1.386815823 | 1           | 1.279511824 | 1.501061184 |             |             |
|         | 1.584827536                                                                                                                                          | 1.193619279 | 1           | 1.693773787 | 1.214422584 | 1.348333501 |             |             |
|         | 1.459244668                                                                                                                                          | 1           | 2.048512604 | 1.807633276 | 1.924304451 | 1.143833188 | 1           |             |
|         | 0.96610493                                                                                                                                           | 1.23278654  | 1.036258959 | 0.90264686  | 1.141304281 | 1           |             |             |
|         | 1.027694352                                                                                                                                          | 0.672674731 | 0.926695884 | 1.224974681 | 0.990538439 | 1           |             |             |
|         | 1.09719526                                                                                                                                           | 0.884242102 | 1.140619367 | 1.163288148 | 1.622079349 | 0.919405158 |             |             |
| YMR137C | YMR137C::PSO2::DNA cross-link repair protein                                                                                                         |             |             |             |             |             | 1           | 1.311529795 |
|         | 1.155202257                                                                                                                                          |             | 1.075082927 | 1           | 1.075973392 | 0.999837636 |             |             |
|         | 1.197076697                                                                                                                                          | 1           | 1.151037586 | 1.219304685 | 1.084494964 | 1.273968179 | 1           |             |
|         | 1.953550436                                                                                                                                          |             |             | 0.493606802 |             |             | 1           |             |
|         | 1.148555127                                                                                                                                          | 1.144430025 | 1.139583152 | 1.127771    | 1.303755057 | 1           |             |             |
|         | 1.020438383                                                                                                                                          | 1.14403374  | 0.984926168 | 1.065378853 | 0.757271902 | 1           |             |             |
|         | 0.940272753                                                                                                                                          | 0.992355974 | 0.955238619 | 0.880045201 | 1.12867755  | 0.908897701 |             |             |
| YMR139W | "YMR139W::RIM11::Required for Imep phosphorylation, association of the Imep-Ume6p meiotic activator, early meiotic gene expression, and sporulation" |             |             |             |             |             |             |             |
|         | 1                                                                                                                                                    | 1.420067841 | 1.301088879 | 1.235090751 | 1.158218728 | 1           |             |             |
|         | 1.248854307                                                                                                                                          | 1.311391037 | 1.085112873 | 0.9794978   | 1           | 1.548785178 |             |             |
|         | 1.643696301                                                                                                                                          | 1.423658903 | 1.21920252  | 1           | 2.729487071 |             |             |             |
|         | 1.126685898                                                                                                                                          |             | 1.519237874 | 1.102563936 | 1.159445715 | 0.907756867 | 1           |             |
|         | 1.470457611                                                                                                                                          | 1.866444476 | 1.775626524 | 1.139548186 | 1.147081516 | 1           |             |             |
|         | 1.204179521                                                                                                                                          | 1.458884257 | 1.438081199 | 0.900570138 | 1.078888442 | 1           |             |             |
|         | 1.442986205                                                                                                                                          | 1.72878973  | 1.202937462 | 1.348354559 | 1.671750556 | 1.185594872 |             |             |
| YMR141C | YMR141C::molecular_function unknown                                                                                                                  |             |             |             |             |             | 1           | 1.477564649 |
|         | 1.441575959                                                                                                                                          | 0.905125131 | 1.419402434 | 1           | 1.00724289  | 0.99102257  |             |             |
|         | 1.106796023                                                                                                                                          | 1           | 1.450386214 | 1.59530182  | 3.206752281 | 1.239255971 | 1           |             |
|         | 1.617978273                                                                                                                                          | 6.584053047 | 1.576683892 | 1.827717218 | 1           | 1.753792312 |             |             |
|         | 4.879451881                                                                                                                                          | 3.54805159  | 1.249485592 | 1           | 1.064949644 | 0.970657743 |             |             |
|         | 0.746270724                                                                                                                                          | 0.611999762 | 0.811595961 | 1           | 1.117041932 | 1.597387298 |             |             |
|         | 1.33640764                                                                                                                                           | 0.872526014 | 1.733292651 | 1           | 1.533732068 | 2.745551285 |             |             |
|         | 1.384201481                                                                                                                                          | 2.476857742 | 2.149776465 | 1.442152689 |             |             |             |             |
| YBR256C | YBR256C::RIB5::Riboflavin biosynthesis                                                                                                               |             |             |             |             |             | 1           | 1.34989124  |
|         | 1.676875944                                                                                                                                          | 1.164302815 | 1.586701039 | 1           | 1.116308451 | 1.091659184 |             |             |
|         | 1.80309931                                                                                                                                           | 1.352692083 | 1           | 2.352262437 | 2.72514553  | 1.804658122 |             |             |
|         | 1.333754285                                                                                                                                          | 1           | 2.011488829 | 1.552180795 | 1.11342651  | 1.533346794 | 1           |             |
|         | 3.697568768                                                                                                                                          | 2.883776493 | 3.041084326 | 2.112432845 | 1           | 1.080664826 |             |             |
|         | 1.46841755                                                                                                                                           | 0.910432289 | 0.673967837 | 0.798181816 | 1           | 1.436933139 |             |             |
|         | 2.6546009                                                                                                                                            | 2.601352803 | 1.77325057  | 2.55767704  | 1           | 2.050053123 |             |             |
|         | 2.706846423                                                                                                                                          | 1.456076578 | 1.573507083 | 1.558895899 | 1.769636024 |             |             |             |
| YBR258C | YBR258C::SHG1                                                                                                                                        |             |             |             |             |             | 1           |             |
|         | 0.973527413                                                                                                                                          | 0.914159178 | 1.255164549 | 1.548218544 | 1           | 0.942236843 |             |             |
|         | 1.214309337                                                                                                                                          | 1.39032955  | 1.226602703 | 1           |             | 0.883399131 | 1.020367391 |             |
|         | 0.94562155                                                                                                                                           | 1           | 1.760214701 | 4.239177209 | 2.029449792 | 1.547896312 | 1           |             |
|         | 0.870806057                                                                                                                                          | 0.952580701 | 0.655309382 | 0.724431797 | 0.832851406 |             |             |             |
|         |                                                                                                                                                      | 1.014232528 | 1.671565167 | 1           | 1.196271039 | 1.372921826 | 1.153737111 |             |
|         | 1.477940538                                                                                                                                          | 1.28629164  |             |             |             |             |             |             |
| YBR260C | YBR260C::RGD1::Related GAP Domain                                                                                                                    |             |             |             |             |             | 1           | 1.178240713 |
|         | 1.255161944                                                                                                                                          | 1.237047274 | 1           | 1.25511481  | 1.315174483 | 1.204502409 |             |             |
|         | 1.099002943                                                                                                                                          | 1           | 1.297162818 | 1.380674364 | 1.227176862 | 1.22386119  | 1           |             |
|         | 0.964296095                                                                                                                                          | 0.913776659 | 1.162063684 |             | 0.509905139 | 0.831954956 |             |             |
|         | 0.512482276                                                                                                                                          | 0.602272258 | 1           | 0.933284015 | 0.811585949 | 1.069278359 |             |             |
|         | 1.17271811                                                                                                                                           | 1.084513379 |             | 0.941166198 | 0.960233483 | 0.874398102 |             |             |

0.735272368 0.955727012 1 0.831627042 0.970154342 0.825176631  
 0.956544546 0.828014 1.170709299  
 YBR262C YBR262C::YBR262C::molecular\_function unknown 1 1.045202498  
 1.429792808 1.224723242 1.73441363 1 1.044327187 1.16999082  
 1.49662404 1.77953023 1 1.228109707 1.341003535 1.89432463  
 1.384610377 1 1.819964681 1.352774305 1.246063661 1.720127192 1  
 3.075314584 4.096884873 3.076971906 1.71139584 1 1.051522721  
 1.127099905 0.745656456 0.769499362 0.829903943 1 1.210328941  
 1.563173862 1.128499019 1.107071441 1.630704516 1 1.547765033  
 1.752938682 1.074734403 1.68627193 2.012159852 1.118171805  
 YBR264C YBR264C::YPT10::similar to Rab proteins and other small GTP-binding  
 proteins 1 1.164204081 1.293170464 1.000910071 1.271904741 1  
 0.959052655 0.929153886 1.076855541 1.198469351 1 1.064042436  
 1.001301333 1.183821712 1.022027165 1 0.616720188 0.708449016  
 1.039872294 1 1.248529703 1.822240193 1.429512684 1.213502795 1  
 0.863015788 0.934632075 0.71468679 0.825498031 0.807042535 1  
 0.972336321 0.960498057 0.95306732 1.272823516 1 1.033127495  
 1.040579982 0.970303332 1.179802674 1.010470134  
 YBR266C YBR266C::YBR266C::molecular\_function unknown 1 1.079741261  
 1.04766693 1.565532359 1.331168133 1 1.167558225 1.051831589  
 1.527224711 1.808102199 1 0.604834276 0.685692372 0.741836245  
 1.636672377 1 0.208984951 0.500137034 1 0.332018602  
 0.23281956 0.193785751 0.494545668 1 0.544934466 0.475009462  
 0.678118162 0.82608225 0.759541784 1 0.498695378 0.710758567  
 0.485563154 1.190091766 1.057594175 1 0.565329241 0.980663238  
 0.2180804 0.527323566 0.789812857  
 YBR280C YBR280C::YBR280C::molecular\_function unknown 1 1.158799379  
 1.401193914 1.374240657 0.987810071 1 1.512690692 1.625906741  
 1.1390132 1.223293147 1 1.62748454 2.075644918 1.778994445  
 1.281653279 1 1.501891323 1.150333239 0.383010939  
 0.549002665 1 1.408452986 1.292701181 1.149764275  
 1.06646983 1 1.386567812 0.934506094 1.307364292 1.081279432  
 0.937312487 1 1.406438893 0.984376059 0.962971337 0.602180949  
 1.328757823 0.804698482  
 YBR282W YBR282W::MRPL27::essential for mitochondrial function 1  
 1.125508337 1.75975738 1.516907176 2.238942383 1 1.212116971  
 1.492086878 2.525636918 2.096625943 1 1.274800435 1.479049663  
 2.221127035 1.315694008 1 1.35580433 1.183886846 0.712250108  
 1.35996806 1 1.974308452 1.7104273 1.876260047 1.399229382 1  
 0.880526961 1.023257008 0.657892551 0.674297852 0.907832435 1  
 1.426975066 1.683622524 1.149200715 1.204312805 2.648554369 1  
 1.139731181 1.129791785 0.884044525 0.846087952 1.843172508 1.427267116  
 YBR284W YBR284W::YBR284W::molecular\_function unknown 1 1.334286482  
 1.390062936 1.289757195 1.127904904 1 1.302253007 1.352505401  
 1.494530775 1.349328009 1 1.486187851 1.452985854 1.77316012  
 1.327747367 1 1.327101623 1.223094668 1.331921105 1.026403126 1  
 0.971509144 0.966492427 0.778867054 1 0.846073671 0.791045132  
 0.785720982 0.978632287 0.844993107 1 0.812993977 0.842239033  
 0.82952491 0.986916108 1 0.94684464 1.002848697 1.030380587  
 0.755881461 1.137403582  
 YBR286W YBR286W::APE3::Aminopeptidase yscIII 1 0.931912696  
 0.852695791 1.326632876 0.897662018 1 1.066011074 1.344360261  
 0.969263518 1.152440302 1 1.173906508 1.05989082 1.670612047  
 1.335113547 1 1.235555306 1.258328221 1.47283741 0.84368948 1  
 0.648149762 0.344094416 0.556229876 0.839003158 1 0.997808094  
 1.021638196 1.34732095 1.518103972 0.917022214 1 1.031508853

|         |                                                                                                                                                                                                                     |             |             |             |             |             |             |
|---------|---------------------------------------------------------------------------------------------------------------------------------------------------------------------------------------------------------------------|-------------|-------------|-------------|-------------|-------------|-------------|
|         | 0.891032764                                                                                                                                                                                                         | 1.190519512 | 1.268212322 | 0.59060578  | 1           | 0.8067308   |             |
|         | 0.755722814                                                                                                                                                                                                         | 1.039028843 | 0.741344696 | 1.150073439 | 0.524498756 |             |             |
| YMR145C | YMR145C::NDE1::Hypothetical ORF                                                                                                                                                                                     |             |             |             | 1           | 1.92228933  | 1.045499236 |
|         | 1.282867985                                                                                                                                                                                                         | 0.974223904 | 1           | 1.58068723  | 1.344873744 | 0.845436133 |             |
|         | 0.740314978                                                                                                                                                                                                         | 1           | 0.535685267 | 0.768251383 | 0.475355412 | 0.354541315 | 1           |
|         | 1.240808634                                                                                                                                                                                                         | 1.006833734 | 1.420510936 | 0.67562756  | 1           | 0.880457057 |             |
|         | 0.40490452                                                                                                                                                                                                          | 0.684069188 | 0.804747263 | 1           | 0.454613763 | 0.13704587  |             |
|         | 0.567325087                                                                                                                                                                                                         | 0.518328237 | 0.380637858 | 1           | 0.259737505 | 0.064744865 |             |
|         | 0.049901811                                                                                                                                                                                                         | 0.433330953 | 0.551802016 | 1           | 0.248045444 | 0.067767792 |             |
|         | 0.44187583                                                                                                                                                                                                          | 0.63186753  |             | 0.519245027 |             |             |             |
| YMR159C | YMR159C::APG16::autophagy                                                                                                                                                                                           |             |             |             |             |             |             |
|         |                                                                                                                                                                                                                     | 0.949093882 |             |             |             |             | 1           |
|         | 1.518081081                                                                                                                                                                                                         |             |             | 0.527260006 | 1           | 0.92453216  |             |
|         | 0.906857201                                                                                                                                                                                                         | 0.838989406 | 1.05375634  | 1           | 0.948497723 | 0.660981074 |             |
|         | 0.755637571                                                                                                                                                                                                         | 1.133848408 | 0.608889794 | 1           |             | 1.041787018 |             |
|         | 1.706469399                                                                                                                                                                                                         | 1.072279805 |             |             |             |             |             |
| YMR161W | YMR161W::HLJ1::Homologous to E coli dnaJ protein                                                                                                                                                                    |             |             |             | 1           |             |             |
|         | 1.384280801                                                                                                                                                                                                         | 1.194509557 | 1.294153577 | 1.128642618 | 1           | 1.189652899 |             |
|         | 1.072641247                                                                                                                                                                                                         | 1.142171845 | 1.262272712 | 1           | 1.126503481 | 1.233776568 |             |
|         | 1.193582439                                                                                                                                                                                                         |             |             |             |             |             |             |
|         | 0.69502798                                                                                                                                                                                                          | 0.855972937 |             | 0.810548005 | 0.953044504 | 1           | 1.09349901  |
|         | 0.959053885                                                                                                                                                                                                         | 0.863474426 | 0.867163661 | 0.951610617 | 1           | 0.819239135 |             |
|         | 0.917377926                                                                                                                                                                                                         | 0.74922589  | 0.533168146 | 0.615127963 | 6.077706171 |             |             |
| YMR163C | YMR163C::YMR163C::molecular_function unknown                                                                                                                                                                        |             |             |             |             |             | 1.018274376 |
|         | 0.726565897                                                                                                                                                                                                         |             | 0.832123673 |             | 0.863249063 | 0.819392963 |             |
|         | 0.871035289                                                                                                                                                                                                         |             | 0.658957718 | 0.78410779  |             |             |             |
|         | 0.539117194                                                                                                                                                                                                         |             |             |             | 1           | 0.996299349 |             |
|         | 1.041453633                                                                                                                                                                                                         | 1.10067565  | 1.170085123 | 1           | 0.939321519 | 0.917022524 |             |
|         | 0.987168593                                                                                                                                                                                                         | 0.885587848 | 0.885233703 | 1           | 0.931823371 | 1.223106114 |             |
|         | 0.68778224                                                                                                                                                                                                          | 1.170724641 | 1.030609488 |             |             |             |             |
| YMR165C | YMR165C::SMP2::involved in plasmid maintenance                                                                                                                                                                      |             |             |             | 1           | 1.697760397 |             |
|         | 1.421286149                                                                                                                                                                                                         | 1.377697363 |             | 1           | 1.60677827  | 1.506924142 | 1           |
|         | 1.464178437                                                                                                                                                                                                         |             | 1.543108109 |             | 0.311255769 |             |             |
|         |                                                                                                                                                                                                                     |             | 1           | 0.936283545 | 0.846254854 | 1.136151872 |             |
|         | 1.100973521                                                                                                                                                                                                         | 0.886489097 | 1           |             | 1.043839794 | 0.926045052 | 0.852394452 |
|         | 0.961811692                                                                                                                                                                                                         | 1           | 1.046200292 | 1.166644847 | 1.151300491 | 1.103691017 |             |
|         | 0.99406626                                                                                                                                                                                                          | 1.09190311  |             |             |             |             |             |
| YMR168C | "YMR168C::CEP3::Cbf3 kinetochore complex binds CDE III centromere element; Cep3p contains an N-terminal Zn2Cys6 type zinc finger domain, a C-terminal acidic domain and a putative coiled coil dimerization domain" |             |             |             | 1           |             |             |
|         | 1.235173319                                                                                                                                                                                                         | 1.279875619 | 1.315609634 | 1.213806432 | 1           | 1.240089029 |             |
|         | 1.229282251                                                                                                                                                                                                         | 1.183202689 | 1.193567793 | 1           | 1.111947644 | 1.182531443 |             |
|         | 1.264007867                                                                                                                                                                                                         | 1.192032823 | 1           | 0.963538661 | 0.669613591 | 0.854252712 | 1           |
|         | 1.218275797                                                                                                                                                                                                         | 1.209460358 |             | 0.952887727 | 1           | 0.969625664 | 0.994370865 |
|         | 1.02793909                                                                                                                                                                                                          | 1.056797447 | 0.918351765 | 1           | 0.911226993 | 0.862191416 |             |
|         | 0.741290689                                                                                                                                                                                                         | 0.68459633  | 0.877152652 | 1           | 0.923911955 | 1.049834942 |             |
|         | 0.974893104                                                                                                                                                                                                         | 1.0038621   | 0.957655018 | 1.220619903 |             |             |             |
| YMR171C | YMR171C::YMR171C::molecular_function unknown                                                                                                                                                                        |             |             |             | 1           | 0.879269841 |             |
|         | 0.765934771                                                                                                                                                                                                         | 0.87796538  | 0.702997845 | 1           | 0.887798949 | 0.859814686 |             |
|         | 0.723920377                                                                                                                                                                                                         | 0.700711181 | 1           | 0.858060331 | 0.895572385 | 0.661797075 |             |
|         | 0.915714468                                                                                                                                                                                                         | 1           | 1.22495078  | 4.84445074  | 1.080031142 | 1           |             |
|         | 1.258039637                                                                                                                                                                                                         | 0.750323743 | 1.292488639 | 1.385165417 | 1           | 1.125162474 |             |
|         | 1.19576588                                                                                                                                                                                                          | 1.302384308 | 1.37611675  | 1.107766573 | 1           | 0.906182566 |             |
|         | 0.85255218                                                                                                                                                                                                          | 0.881791269 | 0.793341056 | 0.795401384 | 1           | 0.971749223 |             |
|         | 0.942622657                                                                                                                                                                                                         | 1.245080544 | 0.941385577 | 0.915112264 | 0.764419775 |             |             |
| YMR187C | YMR187C::YMR187C::molecular_function unknown                                                                                                                                                                        |             |             |             |             |             | 1.204198668 |
|         | 1.157281073                                                                                                                                                                                                         | 1.118961574 |             | 0.948000015 |             | 1.406294498 |             |

|             |                                                                                                                                                         |             |             |             |             |
|-------------|---------------------------------------------------------------------------------------------------------------------------------------------------------|-------------|-------------|-------------|-------------|
| 1.004291461 | 0.849346723                                                                                                                                             | 0.83669328  | 1.197303596 | 1           | 0.769925061 |
| 0.544096558 | 0.555590202                                                                                                                                             | 0.972028218 |             | 0.413279273 | 0.856555724 |
| 0.522911461 | 1                                                                                                                                                       | 0.789584803 | 0.987317143 | 0.944374929 | 0.876956638 |
| 0.715204803 | 0.861005239                                                                                                                                             | 0.834827841 | 0.980239835 | 0.914303672 | 1           |
| 0.885400025 | 0.864483827                                                                                                                                             | 0.854100289 | 0.749486643 |             |             |
| YMR189W     | YMR189W::GCV2::Glycine Cleavage system                                                                                                                  |             | 1           | 1.040881014 |             |
| 0.961500461 | 1.125960515                                                                                                                                             | 0.603770064 | 1           | 1.085035095 | 0.83548502  |
| 0.56521328  | 1                                                                                                                                                       | 2.321709452 | 2.866909471 | 0.95679438  | 0.822393313 |
| 4.08305117  | 4.569185624                                                                                                                                             | 2.48426697  | 0.606506879 | 1           | 2.216916923 |
| 1.995077573 | 1.223150669                                                                                                                                             | 1.276274895 | 1           | 1.396091588 | 1.431310435 |
| 1.671178478 | 1.644911317                                                                                                                                             | 1           | 0.874560102 | 0.939040553 | 0.967963459 |
| 1.490467014 | 3.004718057                                                                                                                                             | 1           | 0.62339145  | 1.005657375 | 1.157399799 |
| 1.408685015 | 4.786243075                                                                                                                                             | 1.583128164 |             |             |             |
| YMR191W     | YMR191W::YMR191W::molecular_function unknown                                                                                                            |             | 1           | 1.154143171 |             |
| 1.047679347 | 0.999518084                                                                                                                                             | 0.902512984 | 1           | 1.064746264 | 1.042288801 |
| 1.099990505 | 1.111161789                                                                                                                                             | 1           | 1.197598698 | 1.169112003 | 1.333373725 |
| 1.139741244 | 1                                                                                                                                                       | 0.733379896 | 0.814304264 | 1.254999649 | 1           |
| 1.17692504  | 1.007280874                                                                                                                                             | 1.08872823  | 1.607474854 | 1           | 1.108492229 |
| 1.035367555 | 1.282971502                                                                                                                                             | 1.214381792 | 0.941252169 | 1           | 1.062468987 |
| 1.061908941 | 1.407838743                                                                                                                                             | 1.068657871 | 0.693670239 | 1           | 0.980245038 |
| 1.006621078 | 0.850591314                                                                                                                                             | 0.798173936 | 1.385237183 |             |             |
| YBR288C     | YBR288C::APM3::Mu3-like subunit of the yeast AP-3 complex which functions in transport of alkaline phosphatase to the vacuole via the alternate pathway |             | 1           | 1.428389976 | 1.361509516 |
| 1.458216548 | 1.282325677                                                                                                                                             | 1.505752135 | 1.382436517 | 1           | 1.149191213 |
| 1.0597831   | 1.163941055                                                                                                                                             | 1.290507415 | 1           | 1.060508758 | 0.747614599 |
| 1           | 0.93615438                                                                                                                                              | 1.2380557   | 1.366391017 | 1           | 0.991774398 |
| 1.064591622 | 0.869209861                                                                                                                                             | 0.802116269 | 0.894734172 | 1           | 1.035112507 |
| 1.212575922 | 1.066633116                                                                                                                                             | 0.833940134 | 1.155651325 | 1           | 1.234701637 |
| 1.354177917 | 0.980191086                                                                                                                                             | 1.253172986 | 1.240615866 | 1.34320725  |             |
| YBR290W     | YBR290W::BSD2::metal homeostasis protein; putative membrane protein                                                                                     |             | 1           | 0.836689158 | 0.980957676 |
| 0.951496435 | 1.033789816                                                                                                                                             | 1.09029235  | 1           | 0.961889014 | 1.097248287 |
| 1.042000991 | 1.134269329                                                                                                                                             | 1           | 0.821016275 | 1.048379556 | 1.154298842 |
| 1.044850543 | 1.460634023                                                                                                                                             | 1.154553035 | 1.190056898 | 1           | 1.103354765 |
| 1.251294312 | 0.85296001                                                                                                                                              | 1.037132095 | 1           |             | 1.457031916 |
| 1.226019508 | 2.187323358                                                                                                                                             | 1           | 1.345158509 | 1.294938142 | 1.24434733  |
| 1.125262098 | 1.522956335                                                                                                                                             | 1.04024128  |             |             |             |
| YCL002C     | YCL002C::YCL002C::molecular_function unknown                                                                                                            |             | 1           | 2.317234159 |             |
| 1.56303639  | 2.177061668                                                                                                                                             | 1           | 1.473038422 | 1.137555837 |             |
| 1.773246609 | 1                                                                                                                                                       | 1.537553627 | 1.088350379 | 1.319909091 | 1.322341757 |
| 1.228555091 | 0.974761448                                                                                                                                             | 1.049055411 | 1           | 1.123424236 | 0.952133205 |
| 0.915392546 | 1.189532968                                                                                                                                             | 1           | 1.21728326  | 1.064802734 | 0.960517497 |
| 1.449091947 | 1.021678102                                                                                                                                             | 1           | 0.848502577 | 1.142176295 | 0.795569144 |
| 0.678118611 | 1.146057295                                                                                                                                             | 1           | 1.119605066 | 1.205838703 | 0.942697609 |
| 1.457175294 | 1.0331422                                                                                                                                               | 1.424640225 |             |             |             |
| YCL004w     | YCL004w::PGS1::17 kDa phosphatidylglycerolphosphate synthase                                                                                            |             | 1           |             |             |
| 1.463875222 | 1.309702928                                                                                                                                             | 1.574448639 | 1.245380956 | 1           | 1.352092543 |
| 1.485668723 | 1.376750031                                                                                                                                             | 1.33384726  | 1           | 1.185836854 | 1.364634616 |
| 1.026173782 | 1.29973168                                                                                                                                              | 1           |             | 1.142902563 | 1           |
| 1.089034406 | 2.305404485                                                                                                                                             |             |             |             | 0.979250541 |
| 0.925295231 | 1                                                                                                                                                       | 0.696111782 |             |             | 1.087416152 |
| 0.786069272 |                                                                                                                                                         | 0.999964678 | 0.759165994 |             |             |
| YCL006C     | YCL006C                                                                                                                                                 | 1.078607396 | 0.994188143 | 1.070065741 | 1.037707084 |
| 1.027908044 | 1.177465533                                                                                                                                             | 1.014934644 | 1.068040398 |             | 0.963299998 |
| 1.015408297 | 0.978089756                                                                                                                                             | 1.026959485 | 1           |             | 0.986373827 |
| 0.647101154 | 1                                                                                                                                                       | 1.404403289 | 2.978061864 | 1.182022281 | 1.350889747 |

0.834736699 0.83792326 0.74081382 0.998650614 0.967238289 1  
 0.86120253 0.817423706 0.746835398 0.922982453 1.329884526 1  
 0.872841098 0.958524377 0.847822792 1.109725187 1.203107335  
 YCL008C YCL008C::STP22::Ste pseudorevertant; required for vacuolar targeting  
 of temperature-sensitive plasma membrane proteins; homologous to the mouse and  
 human Tsg101 tumor susceptibility gene; mutants exhibit a Class E Vps phenotype.  
 1 1.014307972 0.932767088 1.0823508 0.549938743 1 1.122899277  
 1.477326539 0.778030268 0.871200966 1 1.473851966 1.431604408  
 0.718124848 0.850761512 1 0.904944244 1.600692771 0.40211264 1  
 0.644430821 0.738942932 0.190667265 0.469003703 1 0.919200979  
 0.838836765 0.96345186 1.1431639 0.858354296 1 0.868544109  
 0.54192916 0.602624518 0.887581225 0.453556357 1 0.780145367  
 0.577704853 0.948437478 0.590192753 0.9796438 0.61293679  
 YCL010C YCL010C::SGF29::SaGa associated Factor 29kDa 0.921002708  
 0.999882228 1.158399271 0.675488608 1.107816146 1.135727031  
 1.025534505 0.993698835 1.110387077 1.04502437 0.696465354  
 1.119963468 1 0.505763624 0.538960756 0.42857929 1  
 1.368141131 0.952127942 0.693572534 1.174601031 1 0.9735012  
 1.273286239 1 0.741096268 0.421422638 0.57949504 0.721038337  
 1 0.974407241 0.568916556 1.133732041 0.416619467 0.639205537  
 YCL012W YCL012W 1 1.710320727 1.839136812 1.495836596 2.329134524 1  
 1.474209985 1.272303945 2.037885229 1.931489853 1 1.466073419  
 1.243840621 1.621325868 1.795901308 1 0.606657396 0.417780053  
 0.473957605 0.5124394 1 0.497121946 0.998982887 0.609250044  
 0.43877629 1 0.98073228 0.906450518 0.852364713 1.24131733  
 0.621296203 1 0.901140647 0.908620656 0.822684009 0.922364422  
 1.332209012 1 0.876089866 0.877652561 0.988564573 0.878130299  
 1.187971746 0.978071994  
 YCL027w YCL027w::FUS1::cell-surface protein required for cell fusion 1  
 1.439928823 1.225096599 1.031481449 1 1.28117073 1.21591314  
 0.982351744 0.983336397 1 1.267565094 1.269372271 0.890267024  
 0.932576107 1 0.825839463 0.79584121 0.457785198 1  
 1.045692641 1.347812391 0.939426428 0.980672178 1 0.890894755  
 0.937189537 1.107369544 1.084585091 0.695718257 1.209605099  
 0.929807862 1.124226187 0.872904998 0.54102569 1 1.016505582  
 0.716067799 0.883691087 0.60528437 0.848629677 0.652339884  
 YCL029c YCL029c::BIK1::Microtubule-associated protein required for  
 microtubule function during mating and mitosis 1.139390834  
 0.883030048 1.000626017 0.882186527  
 1.034791413 1 0.681373421 1.17679117 1 0.701784586  
 0.435677917 0.995179568 0.957217005 0.867751707  
 0.944432653 0.811756337 0.791122117 1.144475417 1  
 0.957750583 0.886744898 1.150140143 0.966666592 1.020101927  
 YMR193W YMR193W::MRPL24::Mitochondrial ribosomal protein MRPL24 (YmL24) 1  
 0.823888325 1.367507521 1.148561287 1 0.903552337 1.030265289  
 1.364216334 1.263766552 1 0.973880446 1.142598299 1.315879724  
 1.097682725 1 1.210066476 0.952561731 0.85649315 1.466433004 1  
 1.437391381 1.429784185 2.467930274 0.96523446 1 1.226430875  
 1.729317895 1.212554965 1.0820358 1.256641664 1 1.548234196  
 1.860454161 1.708061463 1.67903986 1.5853101 1 1.115125561  
 1.517534027 1.193829636 1.625999445 0.836446015 1.069136866  
 YMR196W YMR196W::YMR196W::molecular\_function unknown 1 1.450350181  
 1.7034786 1 1 1.279013648  
 1.829546626 1  
 1 0.96200866 0.854519976 1.007685322 1  
 1.477768383 1.105963444 1.22607897 1 1.227107758 1.427197868  
 1.166211193 1.279664864 1.099417461 0.992957567

YMR198W YMR198W::CIK1::<u>c</u>hromosome <u>i</u>nstability and  
<u>k</u>aryogamy; CIK1 is important for proper organization of microtubule  
arrays and establishment of a spindle; is essential for karyogamy; and  
expression is regulated by KAR4 and mating 1 0.725678882 1.064668549  
1.019024758 0.950251314 1 0.989411976 1.087877594 1.178832211  
0.862056513 1 1.071513457 1.044614017 0.607299857 1.151200847 1  
0.673157012 0.72998132 0.813853317 1 1.537958062 2.603244482  
1.399824473 0.753181714 1 0.801980033 0.944993959 0.888525605  
0.942424485 1.097191629 1 1.093391559 1.096902029 0.986112811  
1.249424717 1.05921946 1 0.959541031 1.054136784 1.216139405  
0.693049916 1.278605233 1.143564939

YMR213W YMR213W::CEF1::homolog of S. pombe cdc5+ 1 1.185609678  
1.259241143 1.545835534 1.226071838 1 1.249196069 1.162698156  
1.161457333 1 1.019444952 1.185751974 0.932960084 1.380919654  
0.852521943  
0.804430486 1.028511875 0.752374702 0.571252587 1 0.921349388  
0.981029745 0.975205129 1 1.029928817 0.880602077 0.875165093  
1.374862283 0.849860049 1.303804103

YMR215W YMR215W::GAS3::Hypothetical ORF 1 1.306156917 0.793089081  
1.106509057 1 1.232839514 1.068665589 0.564914736 1  
0.943317295 0.70628396 0.43662368 0.795864898 1 0.799490958  
0.322955199 0.336375232 1 0.396996386 0.232815636 0.281453073  
0.304491806 1 1.057727402 1.042595942 1.277475087 1.431929148  
1.135048487 1 1.002316813 0.871235353 1.035011006 0.661959129 1  
0.912213322 0.645562227 0.797763322 1.382843974 0.782176173 1.058629408

YMR217W YMR217W::GUA1::GMP synthase 1 1.20084969 0.666399928  
0.728795617 0.640771031 1 0.989542823 0.80191379 0.546011281  
0.670575459 1 0.917477806 0.443139389 0.180582964 0.706005552 1  
0.664403649 0.240908418 0.124470646 0.322903808 1 0.420898482  
0.114813177 0.065676171 0.311641309 1 1.023635097 0.548825897  
0.827944298 1.384780893 1.002487515 1 0.742449671 0.282833336  
0.375417875 0.468714315 0.276637662 1 0.832963325 0.342494536  
0.526398517 0.648005113 0.294052163 0.638329872

YMR219W YMR219W::ESC1::Establishes Silent Chromatin 1.051519064  
1.082365322 0.795717152  
0.990943956 0.815497841 0.057704391 0.319544072 1  
0.615564117 3.026493792 3.691674426 1.997298302 1 1.064722299  
0.959485537 0.943261742 1.06655383 1 1.346987246 1.27300807  
1.44601045 1.065856943 1.354845344 1 0.949237277 1.31109086  
0.831423454 0.932284354 0.619082369

YMR219W YMR219W::ESC1::Establishes Silent Chromatin  
1 0.857941158  
0.967579574 0.990964354 0.990715321 1 0.633509358  
0.651786974 0.910213289 1 0.77160112 0.852934004 0.832152529  
1.053877464 0.829259164 0.839723408

YMR221C YMR221C::YMR221C::not yet annotated 1 1.555449573 0.973659254  
1.089489404 1.167823801 1 1.254559215 1.074915667 0.958948666 1  
1.229999754 0.753224171 0.706341293 0.918414632 1 0.880810387  
0.463111326 0.644282652 0.854021034 1 0.557629885 0.457210524  
0.482205903 0.594814935 1 1.014494816 0.559951132 0.658184585  
1.384479027 0.952134544 1 0.78730941 0.400044441 0.34531433  
0.512190055 0.748256589 1 0.702186861 0.388701792 0.594846845  
0.948093788 0.577475392 0.761792884

YMR223W YMR223W::UBP8::putative deubiquitinating enzyme 1 1.031715986  
0.842160101 1.161185598 1.06986959 1 1.155201428 1.225077996  
0.804725345 0.87678017 1 0.794389412 0.750462042 0.619916243

|             |                                                                                                                                                                      |             |             |             |             |             |             |   |
|-------------|----------------------------------------------------------------------------------------------------------------------------------------------------------------------|-------------|-------------|-------------|-------------|-------------|-------------|---|
| 0.907480838 | 1                                                                                                                                                                    | 0.569392016 | 0.627380972 | 0.920582039 |             |             |             |   |
| 0.513397664 |                                                                                                                                                                      |             | 1           | 0.911837152 | 0.767348758 | 0.786355265 |             |   |
| 1.030437385 | 1.072657112                                                                                                                                                          | 1           | 0.77357811  | 0.614869831 | 0.48691516  |             |             |   |
| 0.693732443 | 0.64160195                                                                                                                                                           | 1           | 0.89099064  | 0.673724695 | 0.854561662 |             |             |   |
| 1.024349164 | 0.675439992                                                                                                                                                          | 1.207485451 |             |             |             |             |             |   |
| YMR239C     | YMR239C::RNT1::Ribonuclease III                                                                                                                                      |             | 1           | 1.115013233 | 1.105614738 |             |             |   |
| 1.454471562 | 1.452362864                                                                                                                                                          | 1           | 1.060471782 | 1.046803391 | 1.468765251 |             |             |   |
| 1.53671339  | 1                                                                                                                                                                    | 0.719745491 | 0.701742027 | 0.662944714 | 1.336201104 | 1           |             |   |
| 0.737327785 |                                                                                                                                                                      | 0.707383638 |             |             |             |             | 1           |   |
| 0.63533634  | 0.476523454                                                                                                                                                          | 0.483049048 | 0.611458466 | 0.840420524 | 1           |             |             |   |
| 0.785389832 | 0.698669604                                                                                                                                                          | 0.633665373 | 1.004417127 | 1.139726815 | 1           |             |             |   |
| 0.600305097 | 0.695191853                                                                                                                                                          | 0.916428596 | 1.242027598 | 0.531648806 | 1.227624805 |             |             |   |
| YCL031C     | YCL031C::RRP7::involved in rRNA processing                                                                                                                           |             | 1           | 0.841869793 |             |             |             |   |
| 0.965133287 | 0.953558914                                                                                                                                                          | 1.203376249 | 1           | 0.916645145 | 0.784869277 |             |             |   |
| 1.251114189 | 1.00131025                                                                                                                                                           | 1           | 0.728178365 | 0.869408005 | 0.828807615 |             |             |   |
| 0.929616727 | 1                                                                                                                                                                    | 0.773494707 | 0.640910936 | 0.662517397 | 1.046322057 | 1           |             |   |
| 0.914678143 | 1.135419207                                                                                                                                                          | 1.232248298 | 1           | 0.677230723 | 0.706690931 |             |             |   |
| 0.433303995 | 0.495578848                                                                                                                                                          | 0.741515805 | 1           | 0.812890758 | 1.094228121 |             |             |   |
| 0.815835232 | 0.921207927                                                                                                                                                          | 1.718159154 | 1           | 1.032091148 | 1.184079199 |             |             |   |
| 1.118952093 | 1.47583502                                                                                                                                                           | 1.358738404 | 1.514829537 |             |             |             |             |   |
| YCL033C     | YCL033C::YCL033C::molecular_function unknown                                                                                                                         |             | 1           | 1.384543418 |             |             |             |   |
| 1.829700031 | 1.387692327                                                                                                                                                          | 2.062344213 | 1           | 1.318357514 | 1.389211551 |             |             |   |
| 2.505856994 | 2.228213694                                                                                                                                                          | 1           | 1.274687081 | 1.806002107 | 2.962885812 |             |             |   |
| 2.193945623 | 1                                                                                                                                                                    | 1.181759602 | 0.924744665 | 1.266795155 | 1.805851229 | 1           |             |   |
| 2.289829691 | 2.812204357                                                                                                                                                          | 3.679343791 | 2.480065219 | 1           | 1.183532014 |             |             |   |
| 1.32711048  | 1.317743773                                                                                                                                                          | 0.989030751 | 0.952239316 | 1           | 1.11849496  |             |             |   |
| 1.751875852 | 2.038049238                                                                                                                                                          | 1.821730717 | 2.121689892 | 1           | 1.224729583 |             |             |   |
| 1.512777053 | 1.322923635                                                                                                                                                          | 1.076267228 | 1.451535906 | 1.350212256 |             |             |             |   |
| YCL035C     | YCL035C::GRX1::Glutaredoxin                                                                                                                                          |             | 1           | 0.844959415 | 1.567219851 |             |             |   |
| 1.247149368 | 2.361289266                                                                                                                                                          | 1           | 0.96074144  | 1.206819986 | 2.360142714 |             |             |   |
| 2.420176228 | 1                                                                                                                                                                    | 0.874185256 | 1.797991627 | 3.691847503 | 1.651487556 |             |             |   |
|             |                                                                                                                                                                      | 0.771842707 |             |             | 1           | 0.956429465 |             |   |
| 1.244622779 | 0.998602494                                                                                                                                                          | 0.714200044 | 1.036855498 | 1           | 1.152933737 |             |             |   |
| 2.195512969 | 2.033483977                                                                                                                                                          | 2.23190242  | 2.599434882 | 1           | 1.2220758   |             |             |   |
| 1.717007193 | 1.367350619                                                                                                                                                          | 1.765920225 | 2.467099946 | 1.534093225 |             |             |             |   |
| YCL037c     | YCL037c::SRO9::Associates with translating ribosomes; may function in the cytoplasm to modulate mRNA translation; may be involved in organization of actin filaments |             | 1           | 1.947278522 | 1.68518262  | 2.523254233 | 1.856074696 | 1 |
| 2.10960007  | 2.098729082                                                                                                                                                          | 1.744986129 | 2.069525699 | 1           | 1.40271058  |             |             |   |
| 1.285397683 |                                                                                                                                                                      | 1           |             | 0.983466797 | 1           |             |             |   |
| 0.763821987 |                                                                                                                                                                      | 1           | 0.648786273 | 0.531095541 | 0.767721105 |             |             |   |
| 1.046016561 | 0.476377684                                                                                                                                                          | 1           | 0.698517291 | 0.393911934 | 0.490893862 |             |             |   |
| 1.110217055 | 0.381102723                                                                                                                                                          | 1           | 0.466253544 | 0.406458658 | 0.83541133  |             |             |   |
| 0.429184929 | 0.351076146                                                                                                                                                          | 0.413294531 |             |             |             |             |             |   |
| YCL051W     | YCL051W::LRE1::involved in laminarase resistance                                                                                                                     |             | 1           |             |             |             |             |   |
| 0.841924393 | 0.880753465                                                                                                                                                          | 1.026095412 | 0.753618188 | 1           | 0.947218336 |             |             |   |
| 1.027645138 | 0.827620751                                                                                                                                                          | 0.669556106 | 1           | 1.146355714 | 1.052159844 |             |             |   |
| 0.565504776 | 1.015080312                                                                                                                                                          | 1           | 1.168899152 | 1.107313178 |             |             |             |   |
| 0.831215222 |                                                                                                                                                                      | 1           | 1.285781233 | 1.433625659 | 1.506249661 |             |             |   |
| 0.823223008 | 0.926758112                                                                                                                                                          | 1           | 1.388999647 | 2.072127289 | 3.016487564 |             |             |   |
| 1.836203119 | 1.836787431                                                                                                                                                          | 1           | 0.933027291 | 1.794582208 | 1.454110201 |             |             |   |
| 0.727858795 | 1.030589293                                                                                                                                                          | 1.697834945 |             |             |             |             |             |   |
| YCL053C     | YCL053C                                                                                                                                                              | 0.833581282 | 0.962301243 | 1.175741745 |             |             |             |   |
| 0.767601556 | 0.695275824                                                                                                                                                          | 1.625602157 | 0.560618884 | 0.574340313 |             |             |             |   |
| 0.698802456 | 1.296181437                                                                                                                                                          | 0.201034661 | 0.295874156 | 0.680773012 | 1           |             |             |   |
| 0.45363844  | 1.009068195                                                                                                                                                          | 0.655347897 | 0.459851947 | 1           | 0.663912731 |             |             |   |
| 0.557072065 | 0.626998838                                                                                                                                                          | 0.808624348 | 1           | 0.680356538 | 0.778551745 |             |             |   |



|          |                                                                                                                                  |             |             |             |             |             |             |
|----------|----------------------------------------------------------------------------------------------------------------------------------|-------------|-------------|-------------|-------------|-------------|-------------|
|          | 0.557943898                                                                                                                      | 1.232431016 | 1.549288819 | 1           | 0.623933383 | 0.746364671 |             |
|          | 1.243001803                                                                                                                      | 0.543153933 | 0.817471741 | 0.898390244 |             |             |             |
| YCL055W  | YCL055W::KAR4::May assist Ste12p in pheromone-dependent expression of KAR3 and CIK1                                              |             |             |             |             |             |             |
|          | 1                                                                                                                                | 0.766659402 | 0.838403505 | 0.746233639 | 1           |             |             |
|          | 0.841736241                                                                                                                      | 0.769940735 | 0.795553991 | 0.775980791 | 1           | 0.7550667   |             |
|          | 0.932871724                                                                                                                      | 0.909373663 | 1           | 1.087217393 |             | 1.146617303 |             |
|          | 1.430865214                                                                                                                      | 1           | 1.266857738 | 1.274295613 |             | 2.128212485 |             |
|          | 0.982625723                                                                                                                      | 1.042814348 | 0.962840687 | 0.717470709 | 0.979836975 | 1           |             |
|          | 0.939475168                                                                                                                      | 1.440999115 |             | 0.808744965 | 0.907631317 | 1           | 1.75093598  |
|          | 1.695274607                                                                                                                      | 1.55803811  | 0.888583488 | 1.469947905 | 0.937793286 |             |             |
| YCL057w  | YCL057w::PRD1::Saccharolysin (oligopeptidase yscD)                                                                               |             |             |             |             |             |             |
|          | 1                                                                                                                                | 0.930880863 | 0.781357809 | 1.085434678 | 0.516228255 | 1           | 1.009652587 |
|          | 1.068442773                                                                                                                      | 0.696039679 | 0.62242544  | 1           | 1.243809864 | 1.378538471 |             |
|          | 0.839114136                                                                                                                      | 0.99727949  | 1           | 1.452319147 | 1.80471737  | 2.295185567 |             |
|          | 1.084765845                                                                                                                      | 1           | 0.999210729 | 0.637295059 | 1.059493205 | 1.15383909  | 1           |
|          | 1.145691397                                                                                                                      | 1.286086355 | 1.854960117 | 0.966567506 | 0.897287847 | 1           |             |
|          | 1.085024723                                                                                                                      | 1.181770812 | 1.424651425 | 0.958565556 | 0.461849483 | 1           |             |
|          | 1.353386277                                                                                                                      | 1.616043576 | 1.5386933   | 0.646661469 | 1.163193661 | 0.83184279  |             |
| YCL059C  | YCL059C::KRR1::Involved in cell division and spore germination                                                                   |             |             |             |             |             |             |
|          | 1                                                                                                                                | 0.673956652 | 0.562289916 | 0.580205331 | 0.801504166 | 1           | 0.547311353 |
|          | 0.408560949                                                                                                                      |             | 0.901249947 | 1           | 0.52106883  | 0.28842563  | 0.218106953 |
|          | 0.922040196                                                                                                                      | 1           | 0.586667023 |             | 0.205019998 | 0.534139327 | 1           |
|          | 1.576760808                                                                                                                      | 0.763792314 | 0.39078089  | 1.05037321  | 1           | 0.886845105 |             |
|          | 0.619725952                                                                                                                      | 0.456889958 | 0.681266322 | 0.891451728 | 1           | 1.089518964 |             |
|          | 1.011285133                                                                                                                      | 0.770827286 | 1.21462987  | 1.855206606 | 1           | 1.072995426 |             |
|          | 0.863717193                                                                                                                      | 0.812080927 | 1.183759652 | 0.584015762 | 0.937793286 |             |             |
| YCL061C  | YCL061C::MRC1::Mediator of the Replication Checkpoint; required for full activation of Rad53p in response to replication stress. |             |             |             |             |             |             |
|          | 1                                                                                                                                | 1           | 1.029075676 | 1.08124733  | 1           | 1.089316127 |             |
|          | 0.759925797                                                                                                                      | 1.520054816 |             | 1.160135203 |             |             |             |
|          | 1                                                                                                                                | 0.951638505 | 0.856941643 | 1.087386866 | 0.975377328 |             |             |
|          | 1.041062009                                                                                                                      | 1           | 0.872584967 | 1.210364411 | 1.160558707 | 1           |             |
|          | 0.712559436                                                                                                                      | 0.967855279 | 0.099577672 | 1.010153541 | 0.936042061 |             |             |
| YAR075W  | YAR075W::YAR075W::molecular_function unknown                                                                                     |             |             |             |             |             |             |
|          | 1                                                                                                                                | 1.230344158 | 0.851246419 | 1.612106488 | 1           | 1.107249262 | 0.93420051  |
|          | 1.215591241                                                                                                                      | 1.276121611 | 1           | 1.083881007 | 0.725230434 | 0.707171837 |             |
|          | 0.744356483                                                                                                                      | 1           | 1.045403035 | 0.438331357 | 0.31836405  | 0.735011311 | 1           |
|          | 0.942395055                                                                                                                      | 0.750845181 | 0.359984534 | 0.47689853  | 1           | 1.002818592 |             |
|          | 0.852581166                                                                                                                      | 0.588999143 | 0.945029676 | 0.735697533 | 1           | 1.028954334 |             |
|          | 1.089472331                                                                                                                      | 0.784368439 | 0.541001867 | 1.772137132 | 1           | 0.914932084 |             |
|          | 1.331849491                                                                                                                      | 0.810374551 | 2.052495921 | 1.3000847   | 1.23375425  |             |             |
| YER019CA | "YER019CA::SBH2::Ssh1p-Sss1p-Sbh2p complex component, involved in protein translocation into the endoplasmic reticulum"          |             |             |             |             |             |             |
|          | 1                                                                                                                                | 1.393399484 | 0.754587768 | 1.858479795 | 1           | 0.991432721 | 0.895513607 |
|          | 1                                                                                                                                | 0.965735121 | 1.094000395 | 1.511858006 | 1.004415211 | 1           | 0.627269113 |
|          | 0.518427073                                                                                                                      | 0.483899011 | 0.79501819  | 1           | 1.719113024 | 2.606814777 |             |
|          | 1.858696629                                                                                                                      | 1.159878744 | 1           | 0.969054918 | 1.063337908 | 0.720387453 |             |
|          | 0.823945044                                                                                                                      | 1.005776817 | 1           | 1.236299664 | 1.459650228 | 1.198785035 |             |
|          | 1.061228348                                                                                                                      | 1.994610441 | 1           | 0.927492355 | 1.259329792 | 1.071336819 |             |
|          | 1.755065302                                                                                                                      | 1.335464727 | 1.345834036 |             |             |             |             |
| YML085C  | YML085C::TUB1::alpha-tubulin                                                                                                     |             |             |             |             |             |             |
|          | 1                                                                                                                                | 0.985374318 | 0.802615766 | 1           | 1.174096437 | 1.090935323 | 0.791990942 |
|          | 0.868150572                                                                                                                      | 1           | 1.02981401  | 0.990378305 | 0.794513236 | 0.849481868 | 1           |
|          | 1.581467131                                                                                                                      | 0.926296623 | 1.207269319 | 0.683309939 | 1           | 0.781652358 |             |
|          | 0.590044632                                                                                                                      | 0.31638227  | 0.426719513 | 1           | 1.112596552 | 0.79697316  |             |
|          | 1.372154092                                                                                                                      | 1.333038405 | 0.933984732 | 1           | 0.903210136 | 0.845992026 |             |

0.87389657 0.967751948 0.625634005 1 0.925021379 0.799488771  
 0.974172762 0.780797429 0.848479645 0.830091564  
 YMR241W YMR241W::YHM2::Yeast suppressor gene of HM mutant (abf2) 1  
 1.630928944 1.303344911 1.146861727 1.317973182 1 1.337703037  
 1.174291415 1.076374592 1.264515703 1 1.068738009 0.997063565  
 0.947815877 1.150436525 1 0.802927912 0.697387707 0.973360292  
 1.404338747 1 1.215737964 1.097033784 1.280162443 1.108461418 1  
 1.061882626 0.902057977 1.247139028 1.39377429 1.20638152 1  
 1.062809544 0.99246251 1.108338644 1.124399734 0.783527672 1  
 1.023018778 0.879100098 0.879905235 1.371891184 0.503575923 0.992082006  
 YML056C YML056C::IMD4::similar to IMP dehydrogenase 1.722570573  
 0.89397216 1.208715793 1.074908011 1.457716507 1.189547645  
 0.936760883 1.190704017 1.079040617 0.579628893 0.370435424  
 0.825287722 1 0.747603513 0.29969839 0.355119263 0.442690478 1  
 0.512123409 0.241094544 0.157993255 0.501549399 1 0.953645248  
 0.614501587 0.754296477 1.280795962 0.83090848 1 0.781023106  
 0.593512564 0.410443237 0.473130991 0.733749617 1 0.786244845  
 0.501716486 0.608430769 0.955570485 0.535412663 0.829215951  
 YMR243C YMR243C::ZRC1::Zinc- and cadmium-resistance protein 1  
 1.158943161 0.660547934 0.908757321 0.644334994 1 1.039720129  
 0.893648131 0.62586665 0.895111876 1 0.921236211 0.622691196  
 0.434280753 0.805860224 1 0.722942877 0.450610918 0.483961003 1  
 0.669158462 0.222806999 0.194710881 0.437683581 1 0.90320424  
 0.698063093 1.348718763 1.376976842 0.866081337 1 0.979940891  
 0.678771986 0.725416307 0.883052393 0.500475945 1 0.715915712  
 0.381406208 0.628282822 0.266341615 0.830967177  
 YML058CA YML058CA::YML058C-A::molecular\_function unknown 1  
 0.89035696 0.871300358 0.570235629 1 1.035384998 1.074850515  
 0.595701506 0.565610819 1 1.049753998 1.314357848 0.501177161  
 0.771312221 1.23785232 0.880866185 1.283555814 1  
 1.770405123 1.660109715 1.348210878 1.201348302 1 1.08625946  
 1.055254107 0.931617447 0.869315011 1 1.253902806 0.839147234  
 1.412539933 0.823137883 1 0.673346596 1.254378332  
 0.550517773 0.871844482 0.724141067  
 YML117WA YML117WA::YML117W-A::molecular\_function unknown 1 1.430586791  
 2.166092077 1.349721671 2.188042622 1 1.437375748 1.536571513  
 2.023818844 1.872348811 1 1.424780036 2.814823494 1.507742764 1  
 1.490124537 1.324608452 1.37279949 1.668270651 1 1.978941248  
 3.633709024 3.004877574 1.143048411 1 1.220459978 1.311518594  
 0.982048093 0.850670529 0.893167971 1 1.078202709 1.393858108  
 1.263163563 1.07177744 1.469608046 1 1.182562567 1.771022749  
 1.281418721 1.728017753 1.659061161 1.306430994  
 YMR245W YMR245W::YMR245W::molecular\_function unknown 1 1.371375625  
 1.639477204 1.212589381 2.091244579 1 1.137647448 1.18168739  
 1.788012207 1 1.257577476 1.325770922 1.976454639 1.718265175 1  
 1.051535166 0.973677847 1.00037606 1 2.2521094 2.118310604  
 2.432966312 1.258941393 1 0.914419443 1.121090663 0.814786713  
 0.836599469 1.05855862 1 1.323570713 1.988420253 1.514697014  
 1.875893659 2.948561869 1 1.031977786 0.971838077 1.723356358  
 0.977304833 1.152321171  
 YMR290WA YMR290WA::YMR290W-A::molecular\_function unknown 1 1.000416725  
 0.783759052 0.874803252 0.906010676 1 0.92557895 0.757998308  
 0.894415567 0.914549754 1 0.795689515 0.741885061 1.055073501  
 0.9447405 1 0.698074247 0.357245915 0.660384877 0.69841153 1  
 1.025888965 1.40661818 1.078700366 0.431847167 1 0.664454959  
 0.5287983 0.751963315 0.886198047 0.84447199 1 0.942597806

0.731833156 0.809095222 1.021973399 0.746476156 1 0.794991914  
0.701749464 1.018018913 0.861650069 0.680606769 1.093654335  
YMR247C YMR247C::YMR247C::molecular\_function unknown 1  
1 1  
0.411214394 1 1.125075591  
0.846546125 1.105095151 0.941024217 1.042980326 0.880305573  
0.96753569 0.800855688 1.089707381 1 0.992940261 1.356130593  
0.737023464 1.054809077 0.568176748  
YMR247C YMR247C::YMR247C::molecular\_function unknown  
1 1.053793186  
1.020032524 1.092221328 1.261148867 1.111444583 1 0.910842873  
0.618142167 0.58231252 0.831295538 0.592514789 1 0.695200793  
0.567181787 0.870215882 0.622387933 0.596014657 0.87299711  
YMR292W YMR292W::GOT1::Golgi Transport 1 1.658459205 1.37041172  
1.087227965 2.393164476 1 1.028711073 0.913184814 1.648041153  
1.696374528 1 1.123514792 0.913888682 0.988312021 1.215133914 1  
1.179542211 0.831108806 0.709202024 0.961646456 1 0.82972312  
0.879814801 0.553994177 0.612357962 1 0.993208923 0.951704034  
0.810520262 1.053272372 0.796254075 1 0.757068904 1.02169216  
0.87470464 0.737378174 1.031757211 1 0.92100818 0.97555924  
0.805683814 1.539936492 0.821895906 1.519207653  
YMR251W YMR251W::YMR251W::molecular\_function unknown 1 1.63724262  
1.715280756 1.789523521 1.484582097 1 1.464681791 1.569681235  
1.766366955 1.522269666 1 2.568214922 4.255045356 1.627202386 1  
1.670843659 0.957797509 1.102700012 1.091045138 1  
1 1.051426669 0.977102825 1.106267067 1.067200186 1.020222907 1  
0.823238018 1.023377191 0.979767175 1.513391404 1 0.664186621  
0.696330132 0.70848585 0.546573628 1.070755619 0.527125646  
YMR267W YMR267W::PPA2::mitochondrial inorganic pyrophosphatase 1  
0.947343173 1.325249805 1.252802148 1.803000141 1 1.149851511  
1.66380206 1 1.063846364 0.961300882 1.208146988 1.208693832 1  
0.966435038 1.215988702 0.835963977 0.997988993 1  
1.071421588 1.267237522 1.060379748 0.977028487 1.192653174 1  
0.936961755 1.100682746 1.133603095 1.317331043 1.48475729 1  
1.106733374 1.115134929 0.866334168 2.116716907 0.974569543  
YMR269W YMR269W::YMR269W::molecular\_function unknown 1 0.714640169  
1.088459111 0.910334162 1.406911694 1 0.801038763 0.950813503  
1.270138997 1 0.742737978 0.592947714 0.881939362 0.958969088 1  
0.419983321 0.851940149 1 1.892059558  
1.710225217 1 0.603464443 0.460241372 0.508695067 0.8341813 1  
0.721636589 0.88561643 0.779052004 1.998195359 1.851739308 1  
0.700409267 0.625691817 0.863892576 1.124735417 1.05725119 1.048997512  
YMR271C YMR271C::URA10::Fifth step in pyrimidine bio5 1 1.262083276  
1.394065384 1.06840985 1.627506187 1 1.058175414 1.227136971  
1.591245402 1 0.902269212 1.587386175 1.928650577 1.381576924 1  
1.453614486 2.247487344 3.429183009 4.538933312 1 2.558975758  
5.254608087 9.338644523 4.338538993 1 1.003077449 1.111964786  
1.074506217 0.884975243 1.063779941 1 0.691752681 1.10930924  
1.709894376 0.922773613 1.234225358 1 1.117703878 1.33746658  
1.328118609 1.656541882 1.684611009 1.565615701  
YMR274C YMR274C::RCE1::Protease involved in ras and a-factor terminal  
proteolysis 1 1 1  
1.671705164  
1 1.035170779 1.128997231 1.084005267 1.205522299 1.012090627 1  
0.738912858 1.18902181 1 1.143927926  
0.938861383 0.546389387

YMR276W YMR276W::DSK2::Required with RAD23 for duplication of the spindle pole body 1 1.23162845 1.047330766 0.935643735 0.470168829 1  
1.601463393 1.5763223 0.732626784 0.710421853 1 1.523542112  
1.930459837 0.658027498 1 1.001798344 0.601001572  
0.467995146 1 1.163732594 0.802472429 0.934031855  
0.988645678 1.09438071 1 0.832057217 0.949679645 0.577753234  
0.851278143 1 0.900788257 0.669254343 0.923940589 0.6212053  
1.066243283 1.309057884

YMR278W YMR278W::YMR278W::molecular\_function unknown 1 1.141602937  
0.928826039 1.53980853 1.02779505 1 1.505225957 1.511229985  
1.026463499 0.96755383 1 1.150693478 1.400215533 0.676432249  
1.420982989 1 1.740568243 1.145299096 0.862922901  
0.648440997 1 0.985580476 0.95051882 1.076204383  
1.2999281 0.975321892 1 1.016187912 0.659843685 0.858730759  
0.457803398 1 0.859188581 0.701310148 0.869614973 0.643532285  
0.754903531

YMR294W YMR294W::JNM1::coiled-coil domain protein required for proper nuclear migration during mitosis (but not during conjugation) 1  
0.788226449 0.957376999 0.994506153 1.267809713 1 0.949900448  
0.868829079 1.422206574 1.08036684 1 0.691961366 0.945841572  
1.025614237 1 0.993792286 0.818265459 1.101466132 1.257758151 1  
1.624382925 1.488362768 1 0.921025566 0.959870814  
0.737111918 0.776481711 0.964221256 1.003113607 1.16347682  
1.092449766 1.040096377 1.222411837 1 1.070750362 1.35392908  
1.123927833 1.61606575 1.35020315 1.439525903

YMR296C "YMR296C::LCB1::Serine palmitoyltransferase catalyses the committed step in sphingolipid synthesis, the condensation of serine with palmitoyl-CoA to form 3-ketosphinganine." 1 0.926963211 0.82810019 0.804094131  
0.585363407 1 0.969789536 0.969720232 0.752909779 0.669261473 1  
1.029572072 0.93721429 0.818781191 0.895742154 1 0.691475558  
0.795780802 0.806730628 0.615794697 1 0.645874506 0.550755958  
0.536539717 0.788717524 1 0.965651309 0.727640549 0.881412258  
1.192333652 0.815382066 1 0.644532786 0.532852237 0.534279676  
0.718011677 0.659976964 1 0.77473743 0.658862409 0.968245836  
0.765169404 0.793819741 1.030609488

YMR298W YMR298W::YMR298W::molecular\_function unknown 1 1.163893178  
1.495873233 1.00193042 2.006948398 1 0.978386469 0.997321743  
1.892515313 1.522201692 1 1.376918037 1.405114591 2.057632022  
1.535529411 1 1.301721456 0.86734898 0.832131213 1.194363117 1  
1.740434839 2.168556028 1.954120661 1.345998427 1 1.216643271  
1.348234718 0.797024239 0.963923719 0.846284481 1 1.069252169  
1.95349005 1.197344473 1.311989197 1.962764607 1 1.363458771  
1.689706856 1.123965032 1.832594659 1.389460681 1.443028354

YMR300C YMR300C::ADE4::phosphoribosylpyrophosphate amidotransferase 1  
0.745828328 0.576451989 0.529747481 1 0.717886693 0.788974129  
0.637318812 0.547631028 1 1.005592334 0.99046731 0.5172362  
0.467139105 1 1.656707278 1.154499498 0.733957255 0.432290638 1  
2.169973746 1.603329254 0.839373351 0.8907193 1 0.975810348  
1.029332339 0.678148759 1.168405058 1.279598439 1 0.668463208  
1.012531348 0.5391696 0.885120449 4.959637922 1 0.838981077  
0.96293396 0.850263732 1.806291716 5.111001876 1.024480042

YMR302C YMR302C::PRP12::Integral membrane mitochondrial protein 1  
0.949497005 0.998389497 1.282535562 0.835055593 1 1.267459593  
1.492911352 1.117358021 0.910093585 1 1.180320392 1.417134662  
1.058450428 1.144007406 1.351399652 1.647318124 1.975363379  
0.761915674 1 1.132036376 0.93250787 1.026369041 1.00953098 1  
0.919207937 1.034569822 1.143646889 0.996764107 0.991299593 1

1.032838982 0.75573445 0.751417986 0.954327279 0.661446579 1  
0.868033788 0.805417011 1.085044974 0.732402516 1.068585547 0.865116491  
YMR304W YMR304W::UBP15::putative deubiquitinating enzyme 1  
1.161060974 1.244164423 1.430243686 1.131232153 1 1.439437633  
1.290937159 1.100397966 1.019825445 1 1.440828974 1.116359134  
1.219577884 1 1.803230097 2.134213649 1.964583889 1.212657645 1  
1.060808516 1.166353486 1.048281926 1 0.970475486 1.061070716  
1.269980838 0.938083507 0.871183486 1 1.180797829 0.857375712  
1.207906581 1.020101386 0.734332926 1 1.219654079 1.243454083  
1.268428791 0.992761234 1.1371681 0.813454714  
YMR318C YMR318C::ADH6::NADPH-dependent alcohol dehydrogenase 1  
0.984633706 0.824542035 0.855119237 0.68683387 1 0.918877642  
0.905743861 0.848086918 0.799249698 1 1.667663503 1.891255597  
1.101556065 0.738931165 1 3.031636579 3.067550142 2.933868776  
1.541210231 1 1.918514295 1.333991166 1.439725297 1.089754214 1  
1.594394592 1.925090664 2.185765869 1.449974286 0.963765331 1  
1.620933952 1.874153943 2.406742927 1.258644561 0.802576356 1  
1.297592378 1.520978407 1.498520271 0.80015197 0.673315967 1.267027951  
YMR320W YMR320W::YMR320W::molecular\_function unknown 1 1.153427378  
1.066805594 1.106560136 1.231004409 1 1.135560012 1.227489301  
1 0.96726072 1.095387146 0.878424293 1.073493796 1 0.733384698  
1.4041362 1.433261634 1 0.717910933 0.86196998 0.240599837  
0.28691136 1 0.961680047 0.99116563 1.048049474 1.021486503  
0.96737223 1 1.048002711 1.000827915 0.958115968 0.890736298  
0.97204795 1 1.027314727 1.049702072 1.169189975 1.220119818  
0.951235129  
YMR322C YMR322C::YMR322C::molecular\_function unknown 1 1.493924701  
1.759523101 1 1.537965745 1 1.218324365  
2.003363432 1.742341195 1 0.789247246 1.865506318  
1 0.904669056 1  
0.899206383 0.756025285 0.808670706 0.993958094 1.157378018 1  
0.730336916 0.964385095 1.106704789 0.859820562  
YGL074C YGL074C::YGL074C::molecular\_function unknown 1  
1.144799265 1.383194449 1.062985181 1 1.460855571 1.25803362  
1.114990629 1 1.437619698 1.684716275 0.98350643 1.434331295  
0.311996764 1 0.866891432  
0.949084776 1.013711609 1 1.029019766 0.865794555 0.686816962  
1.238940991 1.037801939 1 1.002648458 0.676021799 1.173061197  
0.703280663 0.963669504 0.789812857  
YGL076C YGL076C::RPL7A::Homology to rat L7 and E. coli L30 1  
1.164999842 0.938254659 0.858463518 1 0.941679022 0.899435498  
1.014605602 0.951269887 1 0.813250599 0.657288074 0.580937606  
0.80363028 1 0.633094286 0.381628316 0.201708213 0.433404775 1  
1.109084994 0.570636163 0.367342578 1.093335561 1 1.193864452  
0.797973629 1.108034439 1.132530624 1.2816473 1 1.018229379  
1.071457155 0.702664887 0.526085565 0.977757318 1 1.107407785  
0.923899521 0.876072907 1.169563963 0.754401349 1.177714305  
YGL078C YGL078C::DBP3::ATP-dependent RNA helicase CA3 of the DEAD/DEAH box  
family 1 1.030543597 0.736278817 1.007181727 0.867834306 1  
0.878455502 0.722685999 1.001723904 0.980391696 1 0.569396288  
0.466303496 0.357171245 1.051489925 1 0.312362321 0.27246761  
0.429634713 1 0.404422696 0.286466181 0.236702604 0.630456859 1  
0.820769362 0.567974723 0.693154036 1.045031749 1.006721388 1  
0.749822646 0.577274875 0.44974445 0.769335627 0.848776619 1  
0.56618724 0.529084671 0.737768703 0.93269116 0.411173789 0.901017134  
YGL092W YGL092W::NUP145::Nuclear pore complex protein with GLFG motif  
0.869324483 0.90628634 0.80412786

0.780043922 0.744632764 0.851884582  
1 1.496898928 1.258735246 1.151644348  
1.010370734 0.921514839 0.873828696 1  
0.853913791 0.917942798 0.940989442 1.036358777 0.733667562 4.411393806  
YGL094C YGL094C::PAN2::Required for Pab1p-stimulated poly(A) ribonuclease  
activity 1 1.270263084 1.074203494 1.295702358 1.049076104 1  
1.197742381 1.295409694 1.119849197 0.88967195 1 1.164963812  
1.150113261 0.660792223 1.18186467 1.023787622 1  
1 1.121199687 1.023959167 1.018626821  
1.030800654 1.063460567 1 1.11504465 0.88132685 0.894043269  
0.782275616 0.623548402 1 0.815138481 0.76302823 0.781640717  
0.834934172 0.631209691 0.682111082  
YNL001W YNL001W::DOM34::an ORF of unknown function located in a centromeric  
region duplicated between chromosomes III and XIV (DOM34 homologue on chromosome  
III is a pseudogene) 1 0.852503566 0.978407106 1.06349259 1.182451132 1  
0.890890431 0.850410275 1.110222919 1.110837133 1 0.894452289  
0.904453394 0.746477431 1.125083098 1 0.953208797 0.540944703  
0.577558232 0.908932412 1 1.38836367 1.054757025 1.240280003  
1.177458905 1 0.918093908 0.989968673 0.641352455 0.658758741  
0.95773512 1 0.97555939 1.665368052 1.053117956 1.24587762  
1.955130639 1 1.222535555 1.41011837 1.232124641 1.694740702  
1.193540605 1.366849055  
YGL096W YGL096W::TOS8::Target of SBF 1 1.206841225 1.584522475  
1.232507659 1.351518468 1 1.353276251 1.288833357 1.2085452  
0.955834186 1 1.798637529 1.659728698 1.951095834 1.295546969 1  
2.653940796 2.274020148 2.213047594 2.270849304 1 2.015209178  
1.751535895 2.379440835 1.593688864 1.1469673 1.234257705  
0.945665125 0.748496474 0.908071529 1 1.579011275 1.618866907  
1.525538112 0.913382666 1 1.393752624 1.599099074 0.972677152  
1.079908287 1.295522788 1.347585366  
YNL003C YNL003C::PET8::Member of family of mitochondrial carrier proteins 1  
1.307331601 1.329112622 1.022573904 1.120287917 1 1.204343652  
1.20434723 1.414741261 1.222110471 1 1.454715743 1.473755066  
1.565258784 1.113279585 1 1.868805255 1.465479516 1.533421478  
1.316371035 1 1.34216038 1.55723598 1.586440217 1.193075244 1  
1.24793662 1.483384723 1.494543547 1.349019387 1.134779417 1  
0.992169117 0.938478287 1.201412364 1.083851865 0.726141838 1  
0.9721381 0.805015473 0.918552534 0.530952679 0.989684922 0.865116491  
YGL098W YGL098W::USE1::Protein required for cell viability 1  
1.118226366 1.318740443 1.163867418 1.145100564 1 1.211400993  
1.239046197 1.360195441 1.062382293 1 1.189046898 1.396852416  
1.055182847 1.287786851 1.431441196 1.088780088 0.96616359 1  
1 1.007477461 1.165105308 1.167151502  
0.899732698 1.2955154 1 0.949373921 1.18886802 1.193649341  
0.996706408 0.943283248 1 1.211687803 0.943417587 0.902770591  
1.257376343 1.907109049  
YNL017C YNL017C::molecular\_function unknown  
1.000740649 0.852352507 1.061308979  
0.922308463 1.1106028 1.094946315 0.887943028  
0.885618562  
0.973138786 1 1.062245172 1.188035921 1.567196514 1  
0.656292853 0.861186251 0.965813311  
YGL100W "YGL100W::SEH1::Nuclear pore protein, homologous to sec13" 1  
0.840896996 0.85851205 0.807683809 1.040582557 1 0.804594916  
0.754939238 1.027855239 1.074000637 1 0.715703867 0.769589995  
0.759182279 0.966030055 1 1.111752491 0.852390562 1.000131642  
1.249639557 1 1.470303812 1.094548037 1.686466583 1.416938851 1

|             |                                                                                                                                                                                                                                                                   |             |             |             |                                       |
|-------------|-------------------------------------------------------------------------------------------------------------------------------------------------------------------------------------------------------------------------------------------------------------------|-------------|-------------|-------------|---------------------------------------|
| 1.0229911   | 1.117252391                                                                                                                                                                                                                                                       | 1.213001124 | 1.096742262 | 0.949538253 | 1                                     |
| 1.154015843 | 1.29229956                                                                                                                                                                                                                                                        | 0.904719363 | 0.884955928 | 0.879790073 | 1                                     |
| 0.921298974 | 0.968411664                                                                                                                                                                                                                                                       | 0.913764859 | 0.966106819 | 0.804914427 | 1.132181817                           |
| YNL019C     | YNL019C::YNL019C::molecular_function unknown                                                                                                                                                                                                                      |             |             |             | 1 1.219300674                         |
| 1.275714747 | 1.162373583                                                                                                                                                                                                                                                       | 1.02865808  | 1           | 1.183662088 | 1.05085268                            |
| 1           | 1.568000671                                                                                                                                                                                                                                                       | 1.432501335 | 1.073642623 | 0.786455047 |                                       |
| 0.668137617 |                                                                                                                                                                                                                                                                   | 0.591396855 |             |             |                                       |
|             | 1                                                                                                                                                                                                                                                                 | 0.793960451 |             | 1           |                                       |
|             | 1.561055663                                                                                                                                                                                                                                                       | 0.84847964  |             |             |                                       |
| YGL102C     | YGL102C::YGL102C::molecular_function unknown                                                                                                                                                                                                                      |             |             |             | 1 1.033189847                         |
| 1.337291753 | 0.865975566                                                                                                                                                                                                                                                       | 1.6734008   | 1           | 0.943475058 | 0.857242793                           |
| 1.487698774 | 1.325930525                                                                                                                                                                                                                                                       | 1           | 0.903424625 | 1.007825604 | 1.120439974                           |
| 1.075779634 | 1                                                                                                                                                                                                                                                                 | 0.56539419  | 0.422422059 | 0.28949981  | 0.590278277 1                         |
| 1.483632254 | 1.257672084                                                                                                                                                                                                                                                       | 0.865016404 | 0.909729916 | 1           | 1.125663932                           |
| 0.96541107  | 0.998274315                                                                                                                                                                                                                                                       | 1.055726554 | 1.115091558 | 1           | 1.178696432                           |
| 1.903846074 | 1.076717158                                                                                                                                                                                                                                                       | 0.722054807 | 1.863606666 | 1           | 1.11571451                            |
| 1.636130581 | 1.071469688                                                                                                                                                                                                                                                       | 2.159580147 | 1.295436123 | 1.415883994 |                                       |
| YNL021W     | YNL021W::HDA1::component of histone deacetylase A                                                                                                                                                                                                                 |             |             |             | 1                                     |
| 0.972625711 | 0.913791729                                                                                                                                                                                                                                                       | 1.272828259 | 0.840026651 | 1           | 1.213203645                           |
| 1.402140944 | 0.896571726                                                                                                                                                                                                                                                       | 0.891924908 | 1           | 0.973189428 | 1.026377837                           |
| 0.606788201 | 0.96971496                                                                                                                                                                                                                                                        | 1           | 0.946662818 | 0.863985643 | 0.933148774                           |
| 0.580310943 | 1                                                                                                                                                                                                                                                                 | 0.974157053 | 0.728038516 | 0.893540322 | 1.07794461 1                          |
| 0.865108503 | 0.957985608                                                                                                                                                                                                                                                       | 0.948504117 | 1.020427054 | 0.935144406 | 1                                     |
| 0.936607754 | 0.694302407                                                                                                                                                                                                                                                       | 0.798010352 | 0.951424933 | 0.480136449 | 1                                     |
| 0.99621573  | 0.934036968                                                                                                                                                                                                                                                       | 1.116110358 | 0.630594537 | 0.872483034 | 0.704877326                           |
| YGL116W     | YGL116W::CDC20::Required for onset of anaphase                                                                                                                                                                                                                    |             |             |             | 1 0.677243717                         |
| 0.746328763 | 0.913359607                                                                                                                                                                                                                                                       | 0.805019023 | 1           | 0.82651592  | 0.824375486                           |
| 0.875566867 | 0.855500504                                                                                                                                                                                                                                                       | 1           | 0.716747746 | 0.711333609 | 0.560692766                           |
| 0.67289964  | 1                                                                                                                                                                                                                                                                 | 0.938438174 | 0.538129493 | 0.709380336 | 0.66902675 1                          |
| 1.308334563 | 1.751186097                                                                                                                                                                                                                                                       | 1.289914457 | 2.020959813 | 1           | 0.807373212                           |
| 0.77038549  | 0.859986778                                                                                                                                                                                                                                                       |             | 1.030778471 | 1           | 0.960013844 0.903803639               |
| 0.628499707 | 0.908919194                                                                                                                                                                                                                                                       | 1.034881829 | 1           | 0.628705186 | 0.666256324                           |
| 0.826430154 | 0.905018597                                                                                                                                                                                                                                                       | 0.717897878 | 0.977196433 |             |                                       |
| YNL023C     | YNL023C::FAP1::FKBP12-associated protein                                                                                                                                                                                                                          |             |             |             | 1 0.880333305                         |
| 0.66885604  | 1.057748689                                                                                                                                                                                                                                                       | 0.670801553 | 1           | 1.007852327 | 0.828317355                           |
| 0.847712196 | 0.862579727                                                                                                                                                                                                                                                       | 1           | 0.758136427 | 0.64193084  | 0.468533118                           |
| 1.127736245 | 1                                                                                                                                                                                                                                                                 |             |             | 0.764857725 |                                       |
| 1           | 0.892285158                                                                                                                                                                                                                                                       | 0.756786021 | 0.990340894 | 1.093977171 | 0.884690983 1                         |
| 0.9408845   | 0.64448787                                                                                                                                                                                                                                                        | 0.673164572 | 0.676715777 | 0.682363527 | 1                                     |
| 0.800058283 | 0.743369481                                                                                                                                                                                                                                                       | 0.747158651 | 0.818831315 | 0.508543467 | 0.971942653                           |
| YNL025C     | "YNL025C::SSN8::Component of RNA polymerase II holoenzyme, involved in RNA pol II carboxy-terminal domain phosphorylation. Activity of the kinase (SSN3)/cyclin (SSN8) pair required, along with SSN6 & TUP1, for transcriptional repression of a-specific genes" |             |             |             | 1 0.948402621 0.959512505 0.960750646 |
| 0.879275863 | 1                                                                                                                                                                                                                                                                 | 0.934811471 | 1.061867066 | 0.934601362 | 0.76372063 1                          |
| 1.045979212 | 1.176476322                                                                                                                                                                                                                                                       | 0.727871905 | 0.903794283 | 1           | 1.616381614                           |
| 1.297738998 | 0.991291422                                                                                                                                                                                                                                                       |             | 0.806767753 | 0.592656038 | 0.729348282 1                         |
| 1.041185589 | 1.478846541                                                                                                                                                                                                                                                       | 1.302353141 | 1.148856397 | 1.218043407 | 1                                     |
| 1.398741308 | 0.895057173                                                                                                                                                                                                                                                       | 1.211139727 | 0.962395877 | 1.160692603 | 1                                     |
| 1.221037247 | 0.900682304                                                                                                                                                                                                                                                       | 0.909451028 | 0.747704218 | 1.270655211 | 0.916778372                           |
| YNL027W     | YNL027W::CRZ1::<u>c</u>alcineurin <u>r</u>esponsive <u>z</u>inc-finger                                                                                                                                                                                            |             |             |             | 1 1.029889823 1                       |
| 1.080279675 | 1.154320363                                                                                                                                                                                                                                                       | 0.997904638 | 1.053012794 | 1           | 1.194967455                           |
| 1.127677634 | 0.913121561                                                                                                                                                                                                                                                       | 1.108643784 | 1           | 1.005589572 | 1.023257087                           |
| 1.079113487 | 0.573815086                                                                                                                                                                                                                                                       | 1           | 0.994855933 | 1.127842726 | 1.042746797                           |
| 1.003454675 | 1                                                                                                                                                                                                                                                                 | 0.987103921 | 1.025576488 | 0.862608594 | 0.709079124                           |
| 1.085387785 | 1                                                                                                                                                                                                                                                                 | 1.274924689 | 1.205493949 | 1.151515153 | 0.871134024                           |

0.77228942 1 1.258540564 1.251562713 1.206213963 1.078615418  
 1.079640269 1.068261305  
 YNL041C YNL041C::COG6::<b><u>C</u></b>onserved <b><u>O</u></b>ligomeric  
 <b><u>G</u></b>olgi complex <b><u>6</u></b><br> Complexed with Cog8p; interacts  
 with Cog2p 1 0.926752303 0.973177326 1.264716721 1.00246912 1  
 1.144132407 1.132741728 1.03308585 0.774142172 1 1.076648082  
 1.129290655 0.596486422 1.140904444 1 0.931510691 0.902123036  
 0.715188572 1 1.206612057 1.004456989 0.695341128 0.950473034 1  
 0.871826066 1.091156908 1.048678378 0.926551659 1.023932373 1  
 1.040218631 0.797335057 1.109239414 1.050008743 0.741239272 1  
 1.107315572 0.810715129 1.279068564 0.844328903 1.275319613  
 YFR031CA YFR031CA::RPL2A::Homology to rat L8 and E. coli L2 1  
 1.19406128 0.933561399 0.745684698 0.835260006 1 0.991353833  
 0.916154985 1.030469207 1.087920675 1 0.944560761 0.788252499  
 0.658728606 0.853048917 1 0.951745229 0.475479915 0.290305497  
 0.652542919 1 1.190308956 0.416955599 0.288064248 0.644606948 1  
 1.359287124 0.811983331 1.391049137 1.481647567 1.26564877 1  
 1.099136535 0.880281111 0.664383694 0.497601279 0.521882587 1  
 1.086408224 0.904055034 1.059721608 1.111091546 0.753135806 1.029733823  
 YML025C YML025C::YML025C::structural constituent of ribosome 1  
 0.890585028 1.084766762 1.007623695 1.018596826 1 1.021667225  
 1.114625177 1.186158015 1.095742394 1 0.903002599 0.86746625  
 1.196239189 0.99056461 1 0.932165383 0.952617647 1.211989493  
 1.075292443 1 0.901967326 1.112335027 1.393580406 0.852945963 1  
 1.08180612 0.983160917 0.84704982 0.883362641 0.949110272 1  
 1.105945291 0.994578831 0.802790525 1.1823612 1 1.115409575  
 0.931060003 0.965247177 1.211540273 1.191506386 1.006967579  
 YMR194W YMR194W::RPL36A::Homology to rat L36 1 0.816195836  
 1.25773788 0.849787884 1.65717178 1 0.812138292 0.858334273  
 1.532167585 1.277462504 1 0.789659233 0.807445372 0.989718024  
 0.998303356 1 0.69967528 0.358246377 0.312233532 0.536699159 1  
 1.460631084 1.262340811 0.923563607 0.762028488 1 0.830106881  
 0.667932111 0.592095309 0.685065935 0.843937355 1 1.058337889  
 1.648432689 0.928838577 1.022325554 2.095149384 1 0.775791905  
 1.272498311 0.797180797 1.595267139 0.607722368 0.953554524  
 YMR230W YMR230W::RPS10B::Homology to rat S10 1 1.516452811  
 1.838689893 1.005426139 1.994500462 1 1.216645304 1.021305428  
 1.790158434 1.419696721 1 1.037921745 1.174683996 1.04539311  
 1.108245076 1 0.765345305 0.309563415 0.174435681 0.424546316 1  
 1.399293342 1.116457122 0.70154469 0.841249061 1 0.983716192  
 0.794422601 0.648409096 0.801648827 1.250619199 1 1.685684097  
 2.277658297 1.053347801 0.906867825 2.60552468 1 1.157083372  
 1.940220338 0.889297692 2.226031123 1.071953331 1.050748842  
 YPR204W YPR204W::YPR204W::DNA helicase 1 0.677741349 0.615381075  
 0.833515114 0.392288001 1 1.033669379 0.593452494 0.542483186 1  
 0.83805725 0.801110835 0.399897607 0.729781377 1 1.173212801  
 1.10055098 1.259934366 0.646406021 1 0.707749225 0.411681038  
 0.449392308 0.953195623 1 0.823059741 0.973039526 1.630105927  
 1.710327679 1.530137548 1 0.758873886 0.545774148 0.781858575  
 0.927268565 0.440621269 1 0.620949829 0.596339413 1.018989424  
 0.605929906 0.66169057 0.612061177  
 YPR174C YPR174C::YPR174C::molecular\_function unknown 1 0.878056141  
 0.851526025 0.982644903 0.815161259 1 0.972187242 1.068537411  
 0.975830577 1 0.667579143 0.753170575 0.671564701 1.183753269 1  
 0.337479252 0.358530736 0.784025409 1 0.762506532  
 0.869736766 1.105801801 1 2.227512257 1.185156802 1.16696424  
 1.16860732 1.456233393 1 0.994354 0.66330384 0.669796129



|         |                                                                                                                     |             |             |             |             |             |             |
|---------|---------------------------------------------------------------------------------------------------------------------|-------------|-------------|-------------|-------------|-------------|-------------|
|         | 0.922366475                                                                                                         | 0.793072451 | 1           | 0.901232269 | 0.563587993 | 0.955580477 |             |
|         | 0.773234584                                                                                                         | 0.701152743 | 1.100659341 |             |             |             |             |
| YPR176C | YPR176C::BET2::Geranylgeranyltransferase Type II beta subunit                                                       |             |             |             |             |             | 1           |
|         | 1.223412728                                                                                                         | 0.952242491 | 0.866498031 | 0.752650186 | 1           | 0.958364033 |             |
|         | 0.968387781                                                                                                         | 1.011716736 | 0.943917256 | 1           | 1.230611581 | 1.033375132 |             |
|         | 1.172335731                                                                                                         | 0.957315261 | 1           | 1.556728291 | 0.978874773 | 1.139361395 |             |
|         | 1.076957763                                                                                                         | 1           | 1.627196202 | 0.96316053  | 0.917005506 | 1.107402604 |             |
|         | 1.035123733                                                                                                         | 1.157864473 |             | 1.054875897 | 0.929122727 | 1           | 0.986251878 |
|         | 0.92570706                                                                                                          | 0.817772175 | 0.822252148 | 1.089726265 | 1           | 1.384965961 |             |
|         | 1.013050225                                                                                                         | 0.94114083  | 0.999236131 | 1.035278534 | 1.036738829 |             |             |
| YGL118C | YGL118C::YGL118C::molecular_function unknown                                                                        |             |             |             |             |             | 1           |
|         | 1                                                                                                                   |             | 1.784815555 | 1.748132184 | 1           |             |             |
|         | 1.676559989                                                                                                         |             |             | 0.368580141 |             | 0.143192545 |             |
|         | 1                                                                                                                   | 1.000579487 | 0.829970615 |             | 1.112847235 | 1           |             |
|         | 0.944547174                                                                                                         | 1.439800668 | 0.974042898 | 0.761088256 | 1.570013675 | 1           |             |
|         | 1.110656427                                                                                                         | 1.394456984 | 0.994187925 | 1.508786826 | 1.151470705 | 0.969315762 |             |
| YGL120C | YGL120C::PRP43::Pre-mRNA processing factor involved in disassembly of spliceosomes after the release of mature mRNA |             |             |             |             |             | 1           |
|         | 0.694465975                                                                                                         | 1.021931127 | 0.683453456 | 1           | 0.849902097 | 0.818278773 |             |
|         | 0.713351299                                                                                                         | 0.739396814 | 1           | 0.562981939 | 0.397241367 | 0.234244766 |             |
|         | 0.957907089                                                                                                         | 1           | 0.327319818 |             | 0.190270106 | 0.203543033 | 1           |
|         | 0.48372451                                                                                                          | 0.215969939 |             | 0.622193644 | 1           | 0.861799489 | 0.642196998 |
|         | 0.825882573                                                                                                         | 1.104171003 | 0.802585122 | 1           | 0.907119389 | 0.509125038 |             |
|         | 0.479553031                                                                                                         | 0.774686212 | 0.584797395 | 1           | 0.639491636 | 0.460993916 |             |
|         | 0.726508509                                                                                                         | 0.711884546 | 0.359555814 | 0.671603625 |             |             |             |
| YGL122C | YGL122C::NAB2::nuclear polyadenylated RNA binding protein                                                           |             |             |             |             |             | 1           |
|         | 1.040846177                                                                                                         | 0.967504651 | 1.114583241 | 0.935405372 | 1           | 1.145308347 |             |
|         | 1.345041318                                                                                                         | 0.877230489 | 1.074951084 | 1           | 1.090679124 | 1.091321745 |             |
|         | 0.761294595                                                                                                         | 1.013203666 | 1           | 0.890673848 | 1.00238231  | 0.688493195 |             |
|         | 0.660559344                                                                                                         | 1           | 0.851255522 | 1.016672508 | 1.043018195 | 0.854922487 | 1           |
|         | 0.927934922                                                                                                         | 0.815335549 | 0.845001177 | 0.975527927 | 1.036111723 | 1           |             |
|         | 0.816457234                                                                                                         | 0.860940762 | 0.641397122 | 0.651062371 | 0.701949019 | 1           |             |
|         | 0.85102967                                                                                                          | 0.758706009 | 0.818353804 | 0.845324468 | 0.647296644 | 1.091027549 |             |
| YGL124C | YGL124C::MON1::Product of gene unknown                                                                              |             |             |             |             |             | 1           |
|         | 1.062501618                                                                                                         | 0.990064056 | 0.87686658  | 1           | 0.961451452 | 0.913186433 |             |
|         | 1.074409296                                                                                                         | 0.88922633  | 1           | 0.952909799 | 1.01443928  | 0.962823523 |             |
|         | 0.999155589                                                                                                         | 1           | 0.868960629 |             | 0.946904769 | 1           | 1.520580527 |
|         | 1.711552742                                                                                                         | 2.16236711  | 1.505220277 | 1           | 0.920298201 | 1.00895822  |             |
|         | 1.032979384                                                                                                         | 0.923894511 | 1.005957427 | 1           | 1.1506673   | 1.334805496 |             |
|         | 1.18095568                                                                                                          |             | 1           | 1.055402044 | 1.278566282 | 0.853853675 |             |
|         | 0.891807775                                                                                                         | 0.886652003 | 1.04024128  |             |             |             |             |
| YNL043C | YNL043C::YNL043C::molecular_function unknown                                                                        |             |             |             |             |             | 1           |
|         | 1.706466955                                                                                                         | 1.021279815 | 1.818125066 | 1           | 1.144305366 | 1.070109863 |             |
|         | 1.453988582                                                                                                         | 1.467913926 | 1           | 1.112358316 | 1.110298638 | 1.531389234 |             |
|         | 0.983595956                                                                                                         | 1           | 1.089208266 | 0.776765199 | 0.892021515 | 1.10077484  | 1           |
|         | 1.473854171                                                                                                         | 2.498783873 | 1.377578579 | 0.998625525 | 1           | 1.014970177 |             |
|         | 0.822265334                                                                                                         | 0.5722825   | 0.838784245 | 0.809787995 | 1           | 0.752540161 |             |
|         | 0.974252984                                                                                                         | 0.553454829 | 0.459242546 | 1.003077809 | 1           | 0.875525849 |             |
|         | 1.093196523                                                                                                         | 0.796785878 | 1.566787306 | 1.214438139 | 1.526212659 |             |             |
| YGL126W | YGL126W::SCS3::Required for inositol prototrophy                                                                    |             |             |             |             |             |             |
|         | 1.021968189                                                                                                         | 0.939524836 | 0.951542258 | 0.869324483 |             | 1.070283556 |             |
|         | 1.088496558                                                                                                         | 0.861236968 | 0.80536687  |             | 0.988618231 | 1.010119717 |             |
|         | 1.091440662                                                                                                         | 0.710746025 |             | 0.878405624 | 0.860724813 |             |             |
|         | 0.911542752                                                                                                         | 0.70335976  |             | 1           | 1.067274053 | 1.097570645 |             |
|         | 1.16027213                                                                                                          | 1.331751087 | 1.179819271 | 1           | 0.790665722 | 0.722711332 |             |
|         | 0.713313009                                                                                                         | 1.01205088  | 0.635359758 | 1           | 0.887162333 | 0.76569891  |             |
|         | 0.82566095                                                                                                          | 0.770790765 | 0.881370285 | 0.743404756 |             |             |             |

YNL045W YNL045W::YNL045W::not yet annotated 1 0.996205706 0.932043076  
 0.94127098 0.462417169 1 1.097535758 1.343286761 0.711575413  
 0.658653744 1 1.216022008 1.193796812 0.926331781 0.692113761 1  
 2.093123325 1.723985766 2.186080014 0.875556885 1 1.206602087  
 0.937176707 0.948049902 0.992876837 1 0.888523386 1.05534813  
 1.503898653 1.096839475 0.77863423 1.178087939 1.023518891  
 1.387203078 1.139856876 0.714562243 1 0.943188676 0.968093515  
 1.038973072 0.651919921 0.938405416 0.879126451  
 YGL140C YGL140C::YGL140C::not yet annotated 1 0.88260509 0.704774809  
 1.094227052 0.634616792 1 1.084565623 0.967299488 0.77868987  
 0.678526466 1 1.169106003 1.182960893 0.548371807 1.112345606 1  
 1.425220175 0.484861775 1  
 0.911022577 0.876955635 1.022168885 1.310767709 0.982981969 1  
 0.95008915 0.584838836 0.778077106 0.830304733 0.51189628 1  
 0.630091718 0.626589895 0.686177758 0.449473636 0.590145952 0.842350299  
 YGL140C YGL140C::YGL140C::not yet annotated  
  
 0.588077735  
 2.840524219  
 YNL047C YNL047C::YNL047C::molecular\_function unknown 1 0.855186577  
 0.791869629 0.855868457 0.818734943 1 0.883338524 0.834616348  
 0.755626995 0.758912774 1 0.830646015 0.78433983 0.533326282 1  
 0.661516727 0.756761859 0.483499208 0.710711838 1 1.075837515  
 1.025302512 1.042644318 1.474008918 1 0.991270274 0.677417582  
 1.441018788 1.002800485 1.150437752 1 1.077742839 1.321297005  
 1.165748575 1.031441793 1.002058812 1 0.851352994 1.098449735  
 1.206053337 0.738038268 1.157648401 1.412381543  
 YGL142C "YGL142C::GPI10::Involved in glycosyl phosphatidyl inositol  
 synthesis; could be the target of the GPI synthesis inhibitor, YW3548; Most  
 likely an alpha 1,2 mannosyltransferase utilized for the addition of the third  
 mannose onto the GPI core structure." 1 1.152908378 0.937664744  
 1.101519102 0.745722292 1 1.208268146 1.299210814 0.811971047  
 0.749752686 1 1.313594608 1.010303569 0.817134362 0.758306125 1  
 1.370073513 0.991677921 1.61420938 0.839891938 1 0.8244428  
 1.499666735 1.169015393 0.593456411 1 1.038773006 0.947644764  
 1.005622987 1.063728536 0.898100993 1 0.870372121 0.846392771  
 0.771912126 0.651555947 0.560953217 1 1.175516823 0.861681726  
 0.952306789 0.902066504 0.982250663 0.972818213  
 YNL049C YNL049C::SFB2::binds to Sed5p and Sec23p by distinct domains 1  
 1.119521547 0.914823159 1.374295796 0.806948031 1 1.047501375  
 0.751727898 0.825103086 1 1.206194135 1.05377322 1.8259698 1  
 0.703752267 0.486593372 1 0.650408198  
 0.621709921 1 0.881111895 0.729898601 0.926768194 0.958651046  
 0.824223657 1 0.937641926 0.718022531 0.926108272 0.865654494  
 0.690852664 1 0.701232567 0.75186961 0.981171354 0.790131962  
 0.796013454 0.618190518  
 YGL144C YGL144C::YGL144C::molecular\_function unknown 1 0.961371718  
 1.444199112 1.04072121 1 1.070096217 1.192274977 1.086474788  
 1.147850146 1 0.815738459 0.902866881 0.84302094 1.220596845  
 0.702690576 0.824143967 0.402239585 1  
 1.021174755 1.038032612 1.288330523 1.108924398 1  
 1.004633337 0.68499215 1 0.943866585  
 0.766256311 1.451603405 1.209236781  
 YNL051W YNL051W::COG5::<b><u>C</u></b>onserved <b><u>O</u></b>ligomeric  
 <b><u>G</u></b>olgi complex <b><u>5</u></b><br> Complexed with Cog8p 1  
 0.883990334 1.126936915 0.947645349 1.060838984 1 0.764643646

|             |                                                                                                                                         |             |             |             |             |             |  |
|-------------|-----------------------------------------------------------------------------------------------------------------------------------------|-------------|-------------|-------------|-------------|-------------|--|
| 1.029993726 | 1.005940794                                                                                                                             | 1.060796048 | 1           | 0.97550376  | 1.10251855  |             |  |
| 1.451356632 | 1.012938695                                                                                                                             | 1           | 1.134830193 | 0.769676055 | 1.121981622 | 1           |  |
| 1.707067824 | 1.247774067                                                                                                                             |             | 1           | 0.925077231 | 1.126804673 |             |  |
| 0.892759385 | 0.868219646                                                                                                                             | 1.060922064 | 1           | 0.810331035 | 1.097912861 |             |  |
| 1.208821833 | 0.928681611                                                                                                                             | 0.92921622  | 1           | 0.916886828 | 0.968322183 |             |  |
| 1.101684695 | 0.615059454                                                                                                                             | 1.090893627 | 0.887007122 |             |             |             |  |
| YGL146C     | YGL146C::YGL146C::molecular_function unknown                                                                                            |             |             |             |             |             |  |
| 1.430108783 |                                                                                                                                         | 1.07633719  | 1.15769465  |             |             |             |  |
| 1.300876923 | 1.377147582                                                                                                                             |             | 1.641764598 | 0.696175592 |             |             |  |
| 0.650923151 | 0.841682972                                                                                                                             | 1           | 1.929530539 | 1.524713117 | 1.14735091  | 1           |  |
| 1.318346908 | 1.430996171                                                                                                                             | 1.751376625 | 1.04251369  | 1.261068643 |             |             |  |
| 0.671640514 | 0.821492565                                                                                                                             | 1.107790148 | 0.890455464 | 1           | 0.966712594 |             |  |
| 0.843262437 | 0.653615803                                                                                                                             | 0.928845197 | 1.903606598 |             |             |             |  |
| YNL065W     | "YNL065W::AQR1::A(acids, azoles) Q(quinidine, quinine) Resistance"                                                                      |             |             |             |             |             |  |
| 1           | 0.736940029                                                                                                                             | 0.58314345  | 0.941044354 | 0.847782413 | 1           | 0.836461644 |  |
| 0.921975935 | 0.769519641                                                                                                                             | 1           | 0.554106149 | 0.307931085 | 0.272852653 |             |  |
| 0.784865787 | 1                                                                                                                                       | 0.309162059 | 0.235445524 | 0.242503806 | 0.253846377 | 1           |  |
|             | 0.5917672                                                                                                                               | 1           | 0.581030095 | 0.61484362  | 0.649196593 |             |  |
| 1.126333841 | 0.847355073                                                                                                                             | 1           | 1.090717296 | 1.191733956 | 0.861846565 |             |  |
| 1.772979973 | 1.191913439                                                                                                                             | 1           | 1.230556631 | 1.310809348 | 0.776544919 |             |  |
| 1.143137793 | 0.886131457                                                                                                                             |             |             |             |             |             |  |
| YGL148W     | YGL148W::ARO2::Chorismate synthase 1 0.904763 0.770664346                                                                               |             |             |             |             |             |  |
| 0.754239509 | 0.644720188                                                                                                                             | 1           | 0.78416326  | 0.764833762 | 0.776386344 |             |  |
| 0.798892661 | 1                                                                                                                                       | 0.902544201 | 0.912390915 | 0.432731445 | 0.685962152 | 1           |  |
| 1.577957267 | 0.871380324                                                                                                                             | 0.568886362 | 0.670209326 | 1           | 1.357087528 |             |  |
| 0.651325464 | 0.45940439                                                                                                                              | 0.835509712 | 1           | 1.025359714 | 0.866912617 |             |  |
| 1.254850664 | 1.186981657                                                                                                                             | 0.891816929 | 1           | 1.036607211 | 1.011559099 |             |  |
| 0.865345808 | 0.580222883                                                                                                                             | 0.439881642 | 1           | 1.085360203 | 0.820617812 |             |  |
| 0.941942077 | 0.769777716                                                                                                                             | 0.456729691 | 1.070888195 |             |             |             |  |
| YNL067W     | YNL067W::RPL9B::Homology to rat L9 1 1.383504489 1.178438758                                                                            |             |             |             |             |             |  |
| 1.001342782 | 1.75105846                                                                                                                              | 1           | 1.11041515  | 0.893981473 | 1.418794909 |             |  |
| 1.265771812 | 1                                                                                                                                       | 0.903118627 | 0.827870718 | 0.624250192 | 1.020100493 | 1           |  |
| 0.599951379 | 0.323256599                                                                                                                             | 0.179988517 | 0.567682652 | 1           | 1.449568064 |             |  |
| 0.901716058 | 0.466136211                                                                                                                             | 1.039947052 | 1           | 1.035801219 | 0.975075907 |             |  |
| 0.751219013 | 1.039811168                                                                                                                             | 0.944987119 | 1           | 1.052197646 | 1.529816554 |             |  |
| 0.694778651 | 0.55226829                                                                                                                              | 1.394355319 | 1           | 2.027037683 | 3.00682989  |             |  |
| 1.378907318 | 3.649737565                                                                                                                             | 2.228315309 | 1.514829537 |             |             |             |  |
| YNL069C     | YNL069C::RPL16B::Homology to rat ribosomal protein L13a 1                                                                               |             |             |             |             |             |  |
| 1.921021863 | 1.500712649                                                                                                                             | 0.90664584  | 1.822475205 | 1           | 1.285615581 |             |  |
| 1.083880806 | 1.248796965                                                                                                                             | 1.218094466 | 1           | 1.335091473 | 1.007312438 |             |  |
| 0.964782742 | 0.849220905                                                                                                                             | 1           | 0.808263    | 0.365363866 | 0.249656979 |             |  |
| 0.291741221 | 1                                                                                                                                       | 1.037462502 | 0.609447783 | 0.413688429 | 0.721001266 | 1           |  |
| 1.345500272 | 1.058862556                                                                                                                             | 1.047044562 | 1.56802825  | 1.059880453 | 1           |             |  |
| 1.041116142 | 1.277208395                                                                                                                             | 0.715543009 | 0.611448755 | 1.01073326  | 1           |             |  |
| 1.424212099 | 1.494213894                                                                                                                             | 1.011666522 | 1.855450068 | 1.123515874 | 1.175087415 |             |  |
| YNL071W     | YNL071W::LAT1::Dihydrolipoamide acetyltransferase component (E2) of pyruvate dehydrogenase complex 1 1.35026419 1.090553889 1.398893469 |             |             |             |             |             |  |
| 0.834155065 | 1                                                                                                                                       | 1.447711991 | 1.532507286 | 1.060765911 | 1.116344699 | 1           |  |
| 1.115741297 | 1.357327023                                                                                                                             | 1.212294533 | 1.062246346 | 1           | 1.340235283 |             |  |
| 1.431637437 | 1.858572947                                                                                                                             | 1.386178297 | 1           | 0.681500182 | 0.67419316  |             |  |
| 0.564312656 | 1.212388163                                                                                                                             | 1           | 1.131366652 | 1.023099683 | 1.622854229 |             |  |
| 1.226555357 | 0.848479889                                                                                                                             | 1           | 1.187998565 | 1.190602095 | 1.042685027 |             |  |
| 1.184863317 | 0.832578327                                                                                                                             | 1           | 0.879792436 | 1.181966479 | 1.303667907 |             |  |
| 0.874643663 | 1.084552029                                                                                                                             | 0.867743381 |             |             |             |             |  |
| YNL073W     | YNL073W::MSK1::mitochondrial lysine-tRNA synthetase 1                                                                                   |             |             |             |             |             |  |
| 1.200344423 | 1.303058587                                                                                                                             | 1.702580538 | 1.330635866 | 1           | 1.535105874 |             |  |
| 1.769535652 | 1.301438796                                                                                                                             | 1.321014447 | 1           | 1.145151809 | 1.266335079 |             |  |

|         |                                                                                                                                                                                                             |             |             |             |             |             |             |
|---------|-------------------------------------------------------------------------------------------------------------------------------------------------------------------------------------------------------------|-------------|-------------|-------------|-------------|-------------|-------------|
|         | 1.294075655                                                                                                                                                                                                 | 1.23407108  | 1           | 1.935978858 | 1.611472009 | 1.21476176  | 1           |
|         | 1.640967228                                                                                                                                                                                                 | 1.254415727 |             | 0.434794189 | 1           | 1.07536677  | 1.207029009 |
|         | 1.086960145                                                                                                                                                                                                 | 1.056938726 | 0.955292083 | 1           | 1.139287047 | 0.81242356  |             |
|         | 0.741390652                                                                                                                                                                                                 | 0.578557323 | 0.684590191 | 1           | 1.646439905 | 1.238474722 |             |
|         | 1.056260758                                                                                                                                                                                                 | 1.130508274 | 1.631351929 | 0.714509171 |             |             |             |
| YPR178W | YPR178W::PRP4::Specific component of the U4/U6 and U4/U6-U5 snRNPs which associates transiently with the spliceosome before the first step of splicing.                                                     |             |             |             |             |             |             |
|         | 1                                                                                                                                                                                                           | 0.977134949 | 1.094599536 | 1.148474326 | 1.291302397 | 1           |             |
|         | 1.083867276                                                                                                                                                                                                 | 1.121048962 | 1.277830834 | 1.279331109 | 1           | 1.033682398 |             |
|         | 1.273954266                                                                                                                                                                                                 | 1.182573837 | 1.265925538 | 1           | 1.046868692 | 1.207043101 |             |
|         | 1                                                                                                                                                                                                           | 1.358456968 | 1.745786865 | 1.372301403 | 1.087031415 | 1           | 0.98974155  |
|         | 1.315363821                                                                                                                                                                                                 | 1.024145624 | 0.982816943 | 1.019651069 | 1           | 1.119629615 |             |
|         | 0.880297067                                                                                                                                                                                                 | 1.004494321 | 1.08651788  | 1.779178941 | 1           | 0.964322502 |             |
|         | 0.849927225                                                                                                                                                                                                 | 0.954411895 | 1.127867375 | 1.034111939 |             |             |             |
| YGL150C | YGL150C::INO80::Shows similarity to the Snf2p family of DNA-dependent ATPases                                                                                                                               |             |             |             |             |             |             |
|         | 1                                                                                                                                                                                                           | 0.589452369 | 0.646479463 | 0.773476036 | 0.540762125 | 1           |             |
|         | 0.752464326                                                                                                                                                                                                 | 0.824521531 | 0.628300618 | 0.544721922 | 1           | 0.784815395 |             |
|         | 0.744258451                                                                                                                                                                                                 | 0.463429823 | 0.701063902 | 1           | 0.948320911 | 0.792323234 |             |
|         | 0.697686688                                                                                                                                                                                                 | 1           | 1.294495103 | 1.31959612  | 1.227737166 | 1.281337064 | 1           |
|         | 0.959263318                                                                                                                                                                                                 | 0.983595401 | 1.091029962 | 0.916466926 | 0.954578071 | 1           |             |
|         | 0.931285383                                                                                                                                                                                                 | 0.800434533 | 0.867647666 | 1.075413473 | 0.694882776 | 1           |             |
|         | 0.982198387                                                                                                                                                                                                 | 0.929579544 | 1.137988036 | 0.826347524 | 0.829738626 | 0.717136061 |             |
| YGL164C | YGL164C::YGL164C::molecular_function unknown                                                                                                                                                                |             |             |             |             |             |             |
|         | 1                                                                                                                                                                                                           | 1.313380734 |             |             |             |             |             |
|         | 1.093271875                                                                                                                                                                                                 | 1.17401547  | 1.020335628 | 1           | 1.314790548 | 1.20690419  |             |
|         | 0.962079658                                                                                                                                                                                                 | 1.128963531 | 1           | 1.419133522 | 1.139880389 | 1           |             |
|         | 1.434117033                                                                                                                                                                                                 | 1.400215847 | 1.351702072 | 1.155907522 | 1           | 0.753928021 |             |
|         | 0.854463855                                                                                                                                                                                                 | 0.717853178 | 0.816395709 | 1.078017874 | 0.894899244 |             |             |
|         | 0.67650852                                                                                                                                                                                                  | 1           | 1.044356655 | 0.862229263 | 0.714329344 | 1           |             |
|         | 0.788794402                                                                                                                                                                                                 | 1.091702856 | 0.911134836 | 0.691491518 | 0.784431399 |             |             |
| YGL166W | YGL166W::CUP2::Upregulates metallothionein (CUP1) expression in response to Cu <sup>2+</sup>                                                                                                                |             |             |             |             |             |             |
|         | 1                                                                                                                                                                                                           | 1.074920132 | 1.187598533 | 1.092280736 | 1.097848126 | 1           |             |
|         | 0.973705787                                                                                                                                                                                                 | 0.938852251 | 1.373833352 | 1           | 1.138823313 | 1.457832077 |             |
|         | 1.479402407                                                                                                                                                                                                 | 1.672225823 | 1           | 1.61823538  | 1.037404693 | 1.310930601 |             |
|         | 1.691683266                                                                                                                                                                                                 | 1           | 2.441336693 | 1.971635058 | 1.728334667 | 1.841833097 | 1           |
|         | 1.517116815                                                                                                                                                                                                 | 1.503150348 | 1.511701405 | 1.262083695 | 1.15135164  | 1           |             |
|         | 1.224710187                                                                                                                                                                                                 | 1.27979609  | 1.523115525 | 1.218028702 | 1.148344805 | 1           |             |
|         | 1.730096504                                                                                                                                                                                                 | 1.436346349 | 1.391125298 | 0.55125548  | 1.111632717 | 1.125176811 |             |
| YGL168W | YGL168W::HUR1::required for hydroxyurea resistance                                                                                                                                                          |             |             |             |             |             |             |
|         | 1                                                                                                                                                                                                           |             |             |             |             |             |             |
|         | 1.449626211                                                                                                                                                                                                 | 1.521943848 | 0.929500879 | 1.525072732 | 1           | 0.935834199 |             |
|         | 0.846083616                                                                                                                                                                                                 | 1.651280844 | 1.570442595 | 1           | 1.20842672  | 1.252289428 |             |
|         | 2.492832218                                                                                                                                                                                                 | 1.218785214 | 1           | 1.241533807 | 0.787897146 | 1.124605456 |             |
|         | 1.419295441                                                                                                                                                                                                 | 1           | 1.121839521 | 2.601582216 | 1.976674478 | 0.710015157 | 1           |
|         | 1.073144899                                                                                                                                                                                                 | 0.798487311 | 0.704670532 | 0.802284691 | 0.755016957 | 1           |             |
|         | 1.151843378                                                                                                                                                                                                 | 1.896052376 | 1.434205022 | 1.151527327 | 1.94640831  | 1           |             |
|         | 1.126604438                                                                                                                                                                                                 | 2.195046033 | 1.305235932 | 1.944965055 | 1.363419011 | 1.274908518 |             |
| YNL075W | YNL075W::IMP4::part of small (ribosomal) subunit (SSU) processosome (contains U3 snoRNA); Interacts With Mpp10. Imp4p is a specific component of the U3 snoRNP and is required for pre-18S rRNA processing. |             |             |             |             |             |             |
|         | 1                                                                                                                                                                                                           | 1.01581176  |             |             |             |             |             |
|         | 0.947496596                                                                                                                                                                                                 | 0.998504385 | 1.018127723 | 0.854773932 | 0.743604599 |             |             |
|         | 1.045409187                                                                                                                                                                                                 | 1.175835675 | 0.713734153 | 0.626168472 | 0.837861831 |             |             |
|         | 0.968220143                                                                                                                                                                                                 | 1           | 0.549280283 | 0.550491609 | 0.448204284 |             |             |
|         | 1                                                                                                                                                                                                           | 0.75137628  | 0.656862752 | 0.820553498 | 1.037913744 |             |             |
|         | 0.902805107                                                                                                                                                                                                 | 1           | 0.824473294 | 0.663933424 | 0.491852842 | 1.078857963 |             |
|         | 1.432394318                                                                                                                                                                                                 | 1           | 0.812120117 | 0.711775705 | 0.941441643 | 1.112379805 |             |
|         | 0.602180246                                                                                                                                                                                                 | 1.120798695 |             |             |             |             |             |
| YGL170C | YGL170C::SPO74::Sporulation                                                                                                                                                                                 |             |             |             |             |             |             |
|         | 1                                                                                                                                                                                                           |             |             |             |             |             |             |
|         | 1.515101094                                                                                                                                                                                                 | 1           | 0.962212828 | 0.97370646  | 1.267549196 | 1.579870524 | 1           |

1.320952142  
 1 0.866528345 0.604859945 0.851514127 0.942244555 1.115547285 1  
 0.894755738 0.869751081 1 0.521102303 0.846021974  
 1.047057479  
 YNL089C YNL089C::YNL089C::molecular\_function unknown 1 1.359757513  
 1.389692677 1.176158033 1.382473304 1 1.191648842 1.296378176  
 1.551019827 1.489740931 1 0.981926404 1.112593835 1.282426735  
 1.247359624 1 1.294085492 0.870607183 0.678764115 2.077779574 1  
 1.703966958 1.692465631 1.10669998 1.326012764 1 0.829788045  
 0.987337691 0.958199357 0.8820932 0.915614067 1 0.953410111  
 1.025726581 0.88943512 1.033103975 1.132261559 1 1.215138287  
 1.011547049 1.024438949 1.202456173 1.007460034 1.09453  
 YGL172W YGL172W::NUP49::localizes to discrete spots in the nuclear envelope  
 1.00842406 1.046573776 0.935888216 0.704857708 0.934682034  
 0.874312076 0.822713233 0.992235153 0.976272768 1.454864676  
 1.209051429 1 0.958361979 0.918109777 0.711538704 0.876727302 1  
 0.995134605 0.630408302 0.791415349 0.864834074 1 0.923417142  
 0.979664758 0.93572023 0.822013056 0.88180443 1 1.064532433  
 1.125446891 0.983848517 0.726309864 1.008592155 1 1.089810088  
 1.048180771 0.969087215 0.800263904 0.947168648 1.008718805  
 YNL091W YNL091W::NST1::<u>N</u>egative affector of <u>S</u>alt  
 <u>T</u>olerance 1 1.034496939 0.978669237 1.227331133 1.023709883 1  
 1.257857349 1.225483057 0.975559798 1.013015154 1 1.041533309  
 1.133529083 0.894705059 1.237100129 1 0.765974336 1.979827731  
 1.624998209 1.193576356 0.827722766 0.922530662 0.769329158  
 0.559873994 1 0.978133783 0.931825365 0.885533123 0.939655923  
 0.905404582 1 0.958167603 0.729806795 0.73933382 1.064700972  
 0.92638599 1 1.074448063 0.925456853 1.226109819 0.887596936  
 1.213093041 0.821335332  
 YGL174W YGL174W::BUD13 1 0.937545912 1.220651862 1.026202942  
 1.302561576 1 0.939594067 0.907998947 1.269677744 1.337815531 1  
 0.947843275 0.954088004 0.667669538 1.370855742 1 0.710905848  
 0.790294859 0.733087545 1 1.153441541 1.563733015 1.557185867  
 1.45877432 1 0.891900267 0.983421516 0.754081544 0.939451141 1  
 1.150964304 1.267683657 1.336023789 1.35152568 2.170742231 1  
 1.040768965 1.021270571 1.501034446 0.954430189  
 YNL093W YNL093W::YPT53::Involved in vacuolar protein sorting and endocytosis  
 1.048820974 1.051151593  
 1.226635752 0.852381845 1.538970734 0.402069322  
 0.994341163 0.78871387  
 0.904594842 0.736791422 1 1  
 1.187434399 0.223005048  
 YGL188C YGL188C::YGL188C::molecular\_function unknown 1 1.657244493  
 1.902834044 1.924785535 1 1.401912318 1.137758805  
 1.796414031 1 0.898856438 0.900235848 2.536566602 1.997490154 1  
 1.197357424 1.097186454 1.736943869 1 2.1517247 2.667126862  
 2.572592244 1.733495648 1 0.417688393 0.211762567 0.181837607  
 0.378682283 0.58811219 1 0.50308633 0.191986521 0.153017514  
 0.275904138 1.311687019 1 0.789063398 0.340549322 0.654684678  
 1.969192895 2.684010793 1.91498972  
 YNL095C YNL095C::YNL095C::molecular\_function unknown 1 1.274747543  
 0.842925251 1.105621335 0.854666987 1 1.166145596 1.019371318  
 0.885160721 0.974709284 1 1.049117797 0.742747783 0.591045075  
 1.022834259 1 0.85410625 0.520953588 0.692671082 1  
 1.140091112 1 0.994993169 0.707194254 0.970578478  
 1.287588566 0.901899157 1 0.89940012 0.641176382 0.565829232

0.892643211 0.599881625 1 0.628492886 0.540243526 0.767395047  
 0.557753676 0.481351775 0.746031646  
 YGL190C YGL190C::CDC55::Involved in cellular morphogenesis 1  
 1.136091851 0.983938452 1.316053126 0.954350405 1 1.18422863  
 1.178194597 0.935861739 1 0.940774809 0.97249265 0.801362592  
 1.198016206 1 1.329728001 1.105742396 0.792452117  
 0.696171854 0.857771741 0.94145804 1 0.877381002 0.940137677  
 1.070172503 0.981970742 1.019751241 1 0.929047152 0.788121933  
 1.03200586 0.766815576 0.956497243 1 0.989876283 0.907733337  
 1.076801659 0.942507705 1.407897673 0.943047067  
 YNL097C YNL097C::PHO23::Involved in expression of PHO5 1 0.805911171  
 1.138850758 1.041140605 1.011729581 1 0.931072949 1.061688529  
 1.118277717 1.197634057 1 1.000446838 1.020238687 1.170967637  
 1.099038567 1 1.101162242 0.979490773 1.078358657 0.994918249 1  
 0.990956113 1.084622712 1.37966515 1.101129731 1 0.861241824  
 0.981402743 0.880624585 0.737243634 0.98725993 1 1.201837085  
 1.332575145 1.334240472 1.580720991 1.632041532 1 0.974460932  
 1.190507188 0.721216257 0.854609034  
 YGL192W YGL192W::IME4::IME4 appears to activate IME1 in response to cell-  
 type and nutritional signals and thereby regulate meiosis 1 1.242199879  
 0.715941914 1.170880471 0.778228123 1 1.188660189 1.091700364  
 0.652271438 0.733800656 1 1.309793685 0.902087514 1.105786063  
 0.801106633 1 1.245538295 0.289160121 1.152978329 0.629327511 1  
 1.338541176 1.654371889 1 0.932865566 0.737503807  
 0.721499485 1.110654733 0.794761369 1 1.225797522 0.858417411  
 1.25237499 0.998150536 1.153832724 1 0.793479904 0.826181934  
 1.126288658 0.443912598 1.528869919 0.654966775  
 YNL099C YNL099C::OCA1::Oxidant-induced Cell-cycle Arrest 1 1  
 1.242337475 1.331667249 1.146112456 1.711236425 1 1.11804161  
 1.218329706 1.281979906 1.336248674 1 1.029553612 1.050247422  
 1.194670159 1.201029924 1 1.106936965 0.705390275 1.02181553 1  
 0.940979076 0.6687251 0.945472289 1 0.934417594 0.840864503  
 0.617013981 0.707381692 0.855224026 1 0.892687901 1.08783101  
 0.867511454 1.690773415 1 1.058645075 0.974424391 0.923833605  
 1.18586104 1.463794292 1.010470134  
 YNL113W YNL113W::RPC19::subunit common to RNA polymerases I (A) and III (C)  
 1 0.726916971 0.949979428 0.706079537 1.421112225 1 0.598288508  
 0.624854835 1.128788502 1.149312344 1 0.515808701 0.409051742  
 0.509775019 0.991323739 1 0.316122597 0.199203601 0.221206964  
 1.043009825 1 0.423879345 1.126089816 1 0.759350806  
 0.547076536 0.383344443 0.707960626 0.850193346 1 0.69553727  
 1.071106982 0.548991334 1.060076416 2.243614815 1 0.693413967  
 0.784224314 1.028106318 2.011757028 0.759748798 0.827464674  
 YNL115C YNL115C::YNL115C::molecular\_function unknown 1 0.728964784  
 0.851959731 1.081203679 0.77590809 1 0.916312822 1.071669681  
 0.916136038 0.944211587 1 0.936634012 1.211831731 1.422381646  
 1.248819359 1 1.07446394 1.29547831 1.488068801 1.547853337 1  
 1.691653683 1.067089637 1.543717005 1.445322942 1 0.938423271  
 1.353836916 1.650555987 1.146755654 1.115603205 1 1.068487474  
 1.082432154 1.779625496 1.347607994 0.675848748 1 1.342386757  
 1.32592044 1.633192921 0.938853786 1.33917575 0.782807851  
 YNL117W YNL117W::MLS1::carbon-catabolite sensitive malate synthase  
 1.021968189 1.096681733 1.067627307  
 1.071806846 1.570552683 1.254084927 1 0.582869221 0.686048267  
 0.859022504 0.789232961 1 1.054525192  
 0.865176938 0.956778749 1.292416761 1.122410835 1 0.77195844

0.792054232 1.198488153 1 0.669308277 0.850181771  
 0.533690032  
 YGL194C "YGL194C::HOS2::Protein with similarity to Hda1p, Rpd3p, Hos1p, and  
 Hos3p" 1 1.049592251 0.98494019 0.883237876 1 1.072244761  
 1.180056111 0.843659497 1.14099274 1 1.028973284 1.102364031  
 1.200926392 1.103562288 1 1.111755926  
 1.379808874 1 0.807123149 0.933849878 0.94246698  
 0.981383649 1 1.242378322 0.503301438 1.155160789 1.565606662  
 0.500350247 1 0.767905497 0.499640291 0.827683413 0.227919392  
 0.635154516 0.718887286  
 YGL196W YGL196W::YGL196W::molecular\_function unknown 1 1.165647769  
 1.133919411 0.914192153 1.041458101 1 0.954488456  
 1.09447976 1 1.105332665 1.496938836 1.565819661 1.153818747 1  
 1.911336196 1.866412731 2.325615973 1.988912377 1 1.366992862  
 1.327737778 2.21886524 1.214617149 1 1.383715433 1.536909441  
 1.396639731 1.102447826 1.114921474 1 0.933395899 1.358552637  
 1.060782366 0.692413235 1.17594922 1 1.03505032 1.774067442  
 1.162990862 0.865549337 2.015806238 1.418510884  
 YGL198W YGL198W::YGL198W::molecular\_function unknown 1.26330049  
 0.955468287 0.655233584 0.544306758 0.940214999  
 0.711200925 1.273147385 1.33801199 1.444347508 0.715640965 1  
 1.237692705 0.937780473 1.214948922 1.134347318 1 1.507273107  
 0.922377994 1.201758186 1.144839794 1 1.13796013 1.074129065  
 1.270562301 1.166019806 0.853826073 1 0.932898894 1.206155803  
 1.243588003 0.84901404 0.964772751 1 1.382287488 1.431861722  
 1.262808196 0.919297149 1.128638414 1.080519988  
 YGL212W YGL212W::VAM7::Regulator of vacuolar morphogenesis 1  
 0.876958637 0.911545243 1.049096309 0.677822338 1 1.018493847  
 1.019653893 0.795043143 1 1.038133222 1.133503929 0.566882694  
 1.418275039 1 1.540005348 0.829620608 0.746299257  
 0.776499384 1 1.170815047 1.235773949 1.219188595  
 1.161967654 1 0.962624071 0.576456493 1.375575393  
 0.889665041 1 0.949363262 1.355275949 0.198626784 0.969677474  
 0.654966775  
 YNL119W YNL119W::YNL119W::molecular\_function unknown 1 1.265464091  
 1.25616051 0.860057056 1.343659504 1 1.002600706 0.952708822  
 1.267793572 1.230159618 1 0.887888005 0.848196496 0.89246444  
 0.976255824 1 0.912619963 0.351849145 0.297048119 0.759415751 1  
 1.023308157 0.803386353 0.385773047 0.506075716 1 1.579331766  
 1.177880532 1.305582899 1.563766126 1.458308648 1 1.029355053  
 1.170837672 0.700348754 0.607985243 1.125103283 1 1.193137381  
 1.526729821 1.049395372 1.684132653 1.087958337 1.182092421  
 YGL214W YGL214W::YGL214W::molecular\_function unknown 0.843776699  
 0.789200895 0.935894335  
 0.841531153 0.818434829  
 1 1.088660825 0.981214124 0.946492696 0.962153426  
 0.952633626 1 1.324017916 1.08013491 0.688814722 0.878529447 1  
 1.005148 1.20934945 0.904606129 0.90420514 0.752396877 1.434272122  
 YNL121C YNL121C::TOM70::Translocase of Outer Mitochondrial membrane 1  
 1.135779547 1.149481551 1.306818462 1.15952293 1 1.239606444  
 1.279741049 1.105423651 0.949938589 1 1.091735473 1.117426404  
 0.667353234 1.033072124 1 1.089971226 1.240527729 1.074207412  
 0.923608146 1 0.420566784 1 1.060860708  
 1.255139964 1.087105398 1.101641092 1.074310673 1 1.25984633  
 1.151309927 0.796349188 0.663002129 0.737035579 1 1.159008507  
 1.317027678 1.092594931 1.43329362 1.248337936 1.14969428

YGL216W YGL216W::KIP3::Kinesin-related protein 1 1.259437103  
1.233627682 1.420844385 1.106042737 1 1.093091523 1.161899992  
1.10834934 1 1.00718549 1.141782529 0.929173843 1.340088135 1  
0.473575771 1 1.176353487 1  
0.982371213 0.94758811 1.055409951 0.92872268 1.27111467 1  
0.88165206 0.894917401 0.892122011 0.879930862 1 0.682817876  
1.143541865 1.122138636 1.142082802 0.825713448  
YNL123W YNL123W::YNL123W::molecular\_function unknown 1 0.931872527  
0.888007252 1.025750578 0.881235237 1 1.015480983 0.986927538  
0.940922044 0.986442823 1 0.843330591 0.796178125 0.785817369  
0.915733563 1 0.878682115 0.43555475 0.584915039 0.871685087 1  
1.076828392 1.471604175 0.88376402 0.714530239 1 0.922538533  
0.784425136 0.862708258 0.99347316 0.698784608 1.300896038  
0.918854624 0.693601539 0.996682007 0.89065081 1 1.141057305  
1.145168537 1.134524356 0.958670822 0.9315214 0.80995221  
YGL218W YGL218W::YGL218W::molecular\_function unknown 1 0.915337391  
0.940931038 0.999849161 0.937776528 1 1.015775108 1.208473259  
0.737334368 0.818454736 1 1.476277325 1.245732786 0.765706397  
1.131177108 1 1.198674341 1.155041504 0.907375622 0.820419583 1  
1.030914903 1.042549828 0.958883988 1 1.092892957 1.094706742  
1.05020858 1.041294893 1.084294631 1 1.060020327  
1.149347808 0.867759978 1 1.091567012 1.110334747 1.258915571  
0.529132833 1.315225138 0.756539156  
YNL137C YNL137C::NAM9::putative mitochondrial S4 ribosomal protein 1  
0.777604137 1.02585268 1.079530121 1.01366208 1 0.963014137  
1.216110838 1.12782693 1.143557221 1 0.85964747 0.875036374  
0.922233036 0.89575217 1 1.069511094 0.744834564 1.085640402  
1.123254825 1 1.228231407 1.177017662 1.054303734 0.650653223 1  
0.963727238 1.108359287 1.011362303 0.947957571 0.964988338 1  
1.141078445 0.903544527 0.791461109 0.645531164 0.775186229 1  
1.139267452 1.032715445 0.86309261 0.967193019 1.292990049 0.880002116  
YGL220W YGL220W::YGL220W::molecular\_function unknown 1 1.12962676  
1.227259353 0.712638012 1.308288522 1 1.115076089 0.932085208  
1.308364769 1.299956648 1 1.06888637 1.060772839 0.765576327  
1.501192988 1 0.827442132 0.82640648 1.254159799 1  
1.560501429 2.196637839 1.824724606 1.71921918 1 1.176677647  
1.463094695 0.941241987 0.99046366 1.177719417 1 0.920591201  
1.561083279 1.230676729 0.952181173 1.711079657 1 1.007081829  
1.203448804 0.86020339 1.290321896 1.144313384 1.114669354  
YNL139C YNL139C::RLR1::Required for LacZ RNA expression from certain  
plasmids; suppressor of the Transcriptional (T) defect of Hpr1 (H) by  
Overexpression (O); plays a role in transcription elongation by RNA polymerase  
II 1.057675566 0.971411737 1.282513412 0.782196255 1.43350197  
1.268631179 0.879786687 1.029609695 1.014350594 0.496640564  
0.982904906 1 0.997012792 0.678629624 1 0.620217295  
0.708125717 0.377203029 1 0.900372338 0.876191053 1.107301606  
0.97304123 0.836373308 1.218299493 0.832445803 0.713324812  
1.072426161 0.771982444 1 1.126453836 0.905616691 1.190556164  
0.808561361 0.92864337 0.873872775  
YGL222C YGL222C::EDC1::Enhancer of mRNA Decapping 1 0.979281932  
1.419227882 1.155386226 1.342634489 1 1.43899678 1.481956697  
1.246151026 1 1.300147567 1.432088626 1.56460849 1.292388724 1  
1.068006072 0.516589543 1.054625598 0.796476702 1 0.559955373  
1.061578618 0.721490546 0.603613895 1 0.921205783 1.068972218  
0.948796199 0.781713326 0.891535913 1 1.381208274 0.693462479  
1.201213976 2.569244864 0.974303882 1 0.555962075 0.480588633  
1.136885783 0.379523149 1.566831594 0.654966775



YNL141W YNL141W::AAH1::adenine aminohydrolase (adenine deaminase) 1  
 1.478595434 0.725656713 0.679435051 0.883549368 1 0.705731659  
 0.600985015 0.969054319 1.332031018 1 0.614087333 0.235565488  
 0.266678792 0.831751186 1 0.380258326 0.20310824 0.197959582  
 0.32643686 1 0.119890409 0.226020058 0.117320356 0.37514034 1  
 0.948237866 0.46616774 0.594391815 1.307358113 0.761173572 1  
 0.708107838 0.344895239 0.22141635 0.711108257 0.910626094 1  
 0.554773218 0.39263947 0.563462104 1.019951922 0.232855715 0.759165994  
 YGL236C YGL236C::MTO1::Mitochondrial Translation Optimization; Strong  
 similarity to E. coli GidA 1 1.00562964 0.808264518 1.197495979  
 0.764294613 1 1.151721042 1.047177453 0.967058906 1.025075471 1  
 0.983399218 1.12151692 1 0.853171169  
 0.796290246 0.796869201 1 1.079742695 0.917948541  
 0.953092266 1.161252989 0.918425827 1 0.834101464 0.788955193  
 0.799232161 0.783115604 0.741617359 1 0.808099986 0.763301858  
 0.826907699 0.600405156 1.141159981 0.703126049  
 YNL143C YNL143C::YNL143C::molecular\_function unknown 1.035512392  
 1.167288423 0.807301415 1.232521916 0.839034527 0.726030517  
 1.252106091 0.966440245 0.837914231 0.792230047 1.308793926  
 0.803749949 1 1.389088299 1.259632014 1.563414499 1.532699462 1  
 1.579859489 2.807208477 1.815020946 1.2197797 1 0.522423192  
 0.542918125 0.399935008 0.496287806 0.648396284 1 0.866603706  
 1.451735273 0.622648257 0.862874578 1.700116307 1 1.003291171  
 1.308759338 1.127703666 1.881433854 1.677253704 1.446530805  
 YNL145W YNL145W::MFA2::mating a-factor pheromone precursor 1  
 1.775787664 2.095358695 1.722711468 1 1.80925046 1.749518343  
 2.02091281 1.956792991 1 1.62007509 1.854242283 2.499793722  
 1.755919841 1 0.79208524 0.595582928 0.713277404 0.860872475 1  
 0.915345434 1.425052325 1.246518132 1.642824243 1.006592235  
 0.971023007 0.914345001 1.251695513 1.059257298 1 1.131647972  
 1.109750117 1.056200138 1.609003384 1.317274836 1 0.935517729  
 0.747451013 0.907861404 0.84414482 1.042139211 0.965813311  
 YNL147W YNL147W::LSM7::Like Sm-G protein 1 0.83175798 1.610076691  
 0.932335465 1.859690366 1 0.862481087 0.88587691 1.70330606  
 1.36284962 1 1.011864519 1.480980478 1.787686488 0.965936511 1  
 1.558352363 1.139071928 0.996158797 1.517337642 1 2.023213337  
 2.420636281 2.288637669 1 0.662183091 0.788075274 0.383735416  
 0.41479032 0.863511848 1 1.272827226 2.133854079 1.35534225  
 1.506960373 2.787838633 1 1.70058925 2.327815118 1.802218167  
 3.049802651 2.376922858 1.282789189  
 YNL161W YNL161W::CBK1::cell wall biosynthesis kinase 1 1.109353507  
 1.274972463 1.347400369 1.104242639 1 1.324943379 1.325123172  
 1.253178088 0.934033331 1 1.488299567 1.516159209 0.887467011  
 1.259273819 1 1.043255203 0.716075614 0.924037663 0.660105377 1  
 0.669368009 0.816545237 0.905589709 0.715086849 1 0.928300809  
 0.986206897 0.806982261 0.68816011 1.014059743 1 1.023795059  
 0.813627212 0.776083616 0.814021893 0.608473615 1 1.068970454  
 0.947378236 1.014588135 0.837053705 0.925000147 0.836220905  
 YGL238W YGL238W::CSE1::Protein required for accurate mitotic chromosome  
 segregation 1 1.301927318 1.046534145 1.565704787 0.853252785 1  
 1.529812385 0.946663328 0.834268403 1 1.273297179 1.171154131  
 1.105927411 1.6662573 2.112725302 1.67410973 1.310659959  
 1 1.114248833 0.961331238 0.908719362  
 1.198594924 1.08511565 1 0.890406397 0.560813192 0.620309959  
 0.605017543 0.526999688 1 1.086815632 0.920800119 0.970808408  
 0.836689615 1.139570119 0.911524592

YGL240W YGL240W::DOC1::Doc1p and Cdc26p are associated with the anaphase-promoting complex and are involved in the degradation of Clb2p 1  
1.237742205 1.307492026 1.221872963 1.370937704 1 1.227983861  
1.27661816 1.417196898 1.218410518 1 1.654214514 1.35596563  
1.12054521 1.320562461 0.751087795 0.899320068 0.575609738  
0.833431203 1 1.221393096 2.051917086 1.572542795 1  
0.867043338 0.580984502 0.945910614 0.863776397 1 1.347278969  
0.808931324 1.1352436 0.967733246 1.012374301 1 0.864706669  
0.653600911 0.728237076 0.440647367 1.018873091 0.943922628

YDR269C YDR269C::YDR269C::molecular\_function unknown 0.885295331  
1.319412221 2.079715229  
2.023412608 1.313803245 1 0.700230265 0.611764196  
0.544940061 1 1.713497852 1.011993683 1 1.262198128  
1.124633167 1.313940876 0.839750484 1.073570115 1 3.075003256  
1.590812434 1.574231491 1.792948451 1 1.456155418  
1.312840095 0.119040156 1.238306602 0.626946802

YGL242C YGL242C::YGL242C::molecular\_function unknown 1 0.904129776  
1.426253054 1.591747163 1 0.941693855 0.906301489  
1.443970723 1 1.050319575 1.395043475 1.888061713 1.069535621 1  
1.25685377 0.830240427 1.600357492 1 2.236693269 2.576778982  
2.908452527 1.964821999 1 0.940573991 1.221960821 1.004529933  
0.68342072 1.058962738 1 1.160897459 2.042390605 2.059147374  
1.512250444 1.729498041 1 1.414437114 1.679480809 1.258974161  
1.192078614 1.741746128 1.485058286

YDR270W YDR270W::CCC2::copper-transporting P-type ATPase with similarity to human Menkes and Wilsons genes 1 0.894966219 0.966757416 1.106590387  
1.264889738 1 0.921294638 1.067705683 0.903330962 1.038200624 1  
2.206043024 2.463436246 0.913626616 1.063605628 1 2.133742312  
1.418494637 1.089747 0.933662108 1 2.217621707 1.577641241  
1.200151105 0.915103896 1 1.941874588 1.65946178 1.468357386  
0.862743192 1.208308635 1 3.165670013 1.710243373 1.72512547  
1.454285036 0.546196487 1.713504226 1.20977629 0.705901793  
0.616448783 2.544563255

YGL244W "YGL244W::RTF1::Directly or indirectly regulates DNA-binding properties of Spt15p, TATA box-binding protein, and relative activities of different TATA elements. Member of RNA polymerase II-associated Paf1 complex." 1 0.772904707 0.83781151 0.88990737 0.900733907 1 0.881460502  
0.911957244 0.874835014 1 0.701509188 0.872130657 0.761445622  
0.960615345 1 1.078746981 0.74946477 0.655947963 1  
1.273510896 0.802272088 0.979322301 0.986017536 1 0.886876329  
1.121874374 0.735333625 0.701393372 1.024853534 1 0.940324799  
1.002284293 0.906745393 0.985273139 1.158473556 1 0.882174984  
1.107592805 1.125052826 0.98886604 1.198686846 1.207485451

YDR271C YDR271C::YDR271C::molecular\_function unknown 1 1.291574582  
1.596736843 1.039716699 2.223591419 1 0.976540816 1.021338991  
1.5310555 1.789019022 1 2.82407938 2.69640936 2.390520247  
1.305133686 1 4.995189487 2.34608771 2.074135757 1  
4.074925928 1.463475331 1 2.596689979 2.237749546  
1.290665469 0.472813879 0.941326244 1 4.455225998 4.614282069  
3.037077356 1.596213781 0.838335342 1 3.443442369 4.164061426  
0.912466172 0.60231726 0.953241851 1.249515488

YGL246C YGL246C::RAI1::Product of gene unknown 0.972716756  
0.872334557 0.915336017 0.823295049 0.805113985  
1.131230723 0.635368076 0.760498504 0.662576889 1.088635757 1  
0.627324322 1.581731815 0.935504755 0.862422388 1 0.370972881  
0.569205401 1 0.803159073 0.902194687 0.886046744 0.93384048  
1.004940234 1 0.965638205 0.988203043 0.918636868 1.097017589

|         |                                                                                                                             |             |             |             |             |             |             |
|---------|-----------------------------------------------------------------------------------------------------------------------------|-------------|-------------|-------------|-------------|-------------|-------------|
|         | 1.2605975                                                                                                                   | 1           | 0.864559731 | 1.000716244 | 0.998186679 | 0.788013303 |             |
|         | 0.926410164                                                                                                                 |             |             |             |             |             |             |
| YDR272W | YDR272W::GLO2::Cytoplasmic glyoxylase-II                                                                                    | 1           |             |             |             | 0.701278307 |             |
|         | 1.17844651                                                                                                                  | 1.166227704 | 1.474235605 | 1           | 0.892466817 | 1.10056164  |             |
|         | 1.369533823                                                                                                                 | 1.485425566 | 1           | 0.943813223 | 1.290372377 | 1.822745908 |             |
|         | 1.53048289                                                                                                                  | 1           | 1.589348241 | 1.383084474 | 1.548394106 | 1.804980824 | 1           |
|         | 2.135641205                                                                                                                 | 2.450385583 | 3.043151204 | 1.87379986  | 1           | 0.990204106 |             |
|         | 1.497179699                                                                                                                 | 1.191104853 |             | 1.221882204 | 1           | 1.193598728 | 1.516395983 |
|         | 1.976721609                                                                                                                 | 2.054234953 | 1.438048832 | 1           | 1.225120876 | 1.120689342 |             |
|         | 1.200632463                                                                                                                 | 1.335172021 | 1.980661561 |             |             |             |             |
| YGL260W | YGL260W::YGL260W::molecular_function unknown                                                                                |             |             |             |             | 0.939471995 |             |
|         | 0.841586528                                                                                                                 | 0.929179293 | 0.772406516 |             |             | 0.83477031  | 0.78438817  |
|         | 0.851210833                                                                                                                 |             | 1.410589388 | 1.048197543 | 0.980426858 |             | 1           |
|         | 0.946139635                                                                                                                 |             |             | 0.861657141 |             | 0.233997573 | 1           |
|         | 0.58084112                                                                                                                  | 0.722843874 | 0.760664598 | 0.751238019 | 0.675078541 | 1           |             |
|         | 1.323457273                                                                                                                 | 1.24527919  | 1.70698408  | 1.013741608 |             | 1           |             |
|         | 1.205361632                                                                                                                 | 1.32384404  | 0.854195423 | 1.346786333 | 1.027106933 |             |             |
| YDR282C | YDR282C::YDR282C::molecular_function unknown                                                                                |             |             |             |             | 1           | 1.677538264 |
|         | 1.644020657                                                                                                                 | 1.407185627 | 1.83453479  | 1           |             | 1.400149035 | 1.45662973  |
|         | 1.663937954                                                                                                                 | 1           | 1.106150957 | 1.339723756 | 1.552235983 | 1.20185143  |             |
|         | 0.711997727                                                                                                                 | 1.056793373 | 0.74667877  | 0.991590601 | 1           | 0.829314372 |             |
|         | 0.7753088                                                                                                                   | 0.767024568 | 0.66987787  | 1           | 1.514729244 | 1.553678584 |             |
|         | 1.648193007                                                                                                                 | 2.611148308 | 1.886505563 | 1           | 0.872898653 | 0.363126249 |             |
|         | 0.715727006                                                                                                                 | 0.985487368 | 0.221231295 | 1           | 0.496938171 | 0.321302371 |             |
|         | 0.41389903                                                                                                                  | 0.282673635 | 0.490956677 |             |             |             |             |
| YGL262W | YGL262W::YGL262W::molecular_function unknown                                                                                |             |             |             |             |             | 0.972716756 |
|         | 1.117003661                                                                                                                 |             | 0.892306522 |             |             |             |             |
|         | 1.118006912                                                                                                                 | 1.322816676 |             |             |             | 0.4613475   |             |
|         | 0.138535876                                                                                                                 |             |             | 1           | 0.615108351 | 0.515660907 |             |
|         | 0.613762489                                                                                                                 |             |             |             | 0.8404303   | 1.016079922 | 1           |
|         | 0.97415748                                                                                                                  | 1.124775554 |             | 0.516271966 | 1.81544686  | 0.777554122 |             |
| YDR284C | YDR284C::DPP1::contains a novel phosphatase sequence motif found in a super family of phosphatases including mammalian PAP2 |             |             |             |             | 1           | 1.286556053 |
|         | 1.107083624                                                                                                                 | 1.060338949 | 1.514106573 | 1           | 1.152690672 | 1.11737428  |             |
|         | 1.145125184                                                                                                                 | 1.479591381 | 1           | 1.214380296 | 1.190107931 | 1.650502054 |             |
|         | 1.103981798                                                                                                                 | 1           | 1.683705727 | 1.370343825 | 1.64675712  | 1.550910555 | 1           |
|         | 1.216687985                                                                                                                 | 1.687098306 | 1.880259863 |             | 1           | 1.261802458 | 1.190978809 |
|         | 1.211625816                                                                                                                 | 1.067638218 | 1.045140454 | 1           | 0.943730828 | 1.263052948 |             |
|         | 0.949395817                                                                                                                 | 0.6906828   | 0.974871416 | 1           | 1.412633889 | 1.3684221   |             |
|         | 1.18034828                                                                                                                  | 1.373283475 | 1.725749178 | 1.772262914 |             |             |             |
| YGR001C | YGR001C::YGR001C::molecular_function unknown                                                                                |             |             |             |             | 1           |             |
|         | 0.840068999                                                                                                                 | 1.248843122 | 1           | 0.640250949 | 0.624885488 |             |             |
|         | 0.978165067                                                                                                                 | 1           | 0.775542147 | 0.766105354 | 0.904967322 | 0.85711483  | 1           |
|         | 1.114357027                                                                                                                 | 1.027716931 | 0.676672362 | 1.088310663 | 1           | 2.098617008 |             |
|         | 2.300031985                                                                                                                 | 1.844973202 | 1.592139605 | 1           | 1.040522277 | 1.097243737 |             |
|         | 0.752986216                                                                                                                 | 0.837071266 | 0.979106794 | 1           | 1.039850865 | 1.449411482 |             |
|         | 1.046293123                                                                                                                 | 0.998622656 |             | 1           | 1.006202167 | 1.298876522 | 0.883775084 |
|         | 1.523754226                                                                                                                 | 1.026457515 | 1.448282134 |             |             |             |             |
| YDR286C | YDR286C::YDR286C::molecular_function unknown                                                                                |             |             |             |             | 1           | 1.224807776 |
|         | 1.69836261                                                                                                                  | 1.089913733 | 2.134270765 | 1           | 1.01635068  | 1.175349385 |             |
|         | 1.900620153                                                                                                                 | 1.659215977 | 1           | 1.030608936 | 1.382269651 | 2.173917108 |             |
|         | 1.286910329                                                                                                                 | 1           | 1.332606757 | 0.86724434  | 0.719070704 | 1.684021154 | 1           |
|         | 1.845424492                                                                                                                 | 3.94937718  | 3.430482404 |             | 1           | 0.895535447 | 0.973646437 |
|         | 0.526533671                                                                                                                 | 0.607204224 | 0.810348539 | 1           | 1.148048538 | 1.846091899 |             |
|         | 1.63354679                                                                                                                  | 1.47339959  | 2.993615991 | 1           | 1.132106902 | 1.678310587 |             |
|         | 1.109113622                                                                                                                 | 1.979208888 | 2.092731614 | 2.137398171 |             |             |             |

YGR003W YGR003W::YGR003W::molecular\_function unknown 1 0.759237178  
0.716083834 0.824803979 0.757194991 1 0.684129938 0.821237814  
0.782849512 0.777319459 1 0.872933093 0.731748162 0.413423543  
0.967546657 1 0.964262504 0.723163929 0.846575387 1  
0.88409174 1.365118619 0.981271212 0.770673951 1 0.96255719  
0.913442818 1.191693121 1.177419391 1.048748287 1 1.174357562  
0.944936564 1.011135299 1.286734301 0.839735437 1 0.841118111  
0.908170686 0.999215043 0.663239893 0.647666433 0.843225912  
YDR288W YDR288W::YDR288W::molecular\_function unknown 1 0.857721106  
1.112895991 0.936913249 1.132045326 1 0.907257036 0.94221375  
1.207795955 1.11341467 1 0.92623427 1.046272106 1.275700263  
1.07751094 1 0.99838426 0.77322026 1.032107845 1.325812101 1  
1.494841636 1.829050192 2.119123901 1.099971489 1 1.280850469  
1.267247614 1.171208722 1.026766926 1.290961737 1 0.966008856  
1.279812309 1.711513506 1.10345937 1.425206009 1 1.00324729  
0.828430674 0.733839343 1.024691911 0.78301956 2.098870793  
YGR005C YGR005C::TFG2::transcription initiation factor TFIIF middle subunit  
1 0.570183323 0.733498127 0.770781936 0.959840577 1 0.700372025  
0.694199434 0.96932162 0.898964055 1 0.761074306 0.834426331  
0.785267758 0.8815947 1 1.114550305 0.937686651 0.657093212  
1.093766483 1 1.572696462 1.058161006 1.505969721 1.394730321 1  
0.878749129 1.052978835 1.001400152 1 1.301291163  
1.515198151 1.437552226 1.260619773 1.54098348 1 1.189329893  
1.129194684 1.010076492 0.937848566 1.31335556 1.119923134  
YDR290W YDR290W::YDR290W::molecular\_function unknown 1 1.03545856  
0.9311576 1.182753849 0.976021523 1 1.202175894 1.086171928  
0.877975517 0.9201947 1 1.10427829 1.089897773 0.70329094  
0.955211283 1 1.396379593 1.454433628 0.993034434  
1 0.947205017 0.952350173 1.046628055 1.018571722  
1.106705234 1 1.115157941 0.961100333 0.979146714 0.695228791  
0.87024005 1.098996335 0.931059917 0.816441733 0.849355305  
YDR292C YDR292C::SRP101::signal recognition particle receptor - alpha  
subunit 1 0.655443106 0.722800372 0.815665648 0.892302265 1  
0.911663153 0.807911397 0.782682011 1 0.643614772 0.727470446  
0.36153636 0.832189103 1 0.986023982 0.674855205 0.618047606  
0.676707784 1 1.352067866 0.931335587 0.838034428 1.282133493 1  
1.114144276 1.062460248 1.106658225 1.004798562 1.25474653 1  
0.949015774 0.910915396 0.9080049 0.803860067 1 1.053546722  
1.051162167 1.208162962 1.190142768 0.944233535 0.901892695  
YGR007W YGR007W::MUQ1::choline phosphate cytidyltransferase (also called  
phosphoethanolamine cytidyltransferase or phosphocholine cytidyltransferase)  
1 0.800106267 0.879583649 0.820064646 0.890977459 1 0.846557902  
0.949570203 0.954626607 1 0.857884573 0.988773598 1.096837894  
0.972840774 1 0.700271142 0.666360168 0.989709377 1  
1.317194208 1.029160455 1.113589528 1.034645913 1 0.914822801  
1.132700507 1.013013512 0.905120321 1.121753836 1 1.077319409  
1.058578586 1.295062405 0.964794222 1.015974041 1 0.824860975  
1.061912702 0.864308248 0.672444262 1.057907844 0.934290836  
YGR021W YGR021W::YGR021W::molecular\_function unknown 0.674745249  
0.960023568 1.099382212 0.796659015 1.047856424 1.424353563  
0.871035289 0.808979077 0.881078266 1.257376987 1.003463702 1  
0.99507891 1.188664543 0.960952745 1.468760116 1 1.637517511  
1.817558429 3.114088854 1.774874639 1 1.343568679 1.368533178  
1.297720608 1 1.575932091 1.676138957 1.340942454 1.281780926  
1.692647004 1 1.446269121 1.161028882 0.966542556 0.455825521  
1.663751643 1.085773768

YDR306C YDR306C::YDR306C::molecular\_function unknown 1 1.234518277  
1.253456518 1.350558349 1.339857146 1 1.286707994  
1.341076697 1 1.125267627 1.12824259 1.090672353 1.222148645  
0.831979237  
0.975625007 0.836549937 0.858056166 0.896589042 1 1.024275119  
1.076787014 1.232363642 0.943506358 1.012713504 1 0.871584347  
1.030496728 1.018756244 1.068510613 0.8680727 0.618190518  
YGR023W YGR023W::MTL1::Mid-Two Like 1 1.01581176 0.903082654  
1.207597728 0.931978509 1.00490422 1.08739819 1.008567177  
1.478104773 1.27454903 1.309962546 1.168912872 1 1.285913883  
0.932372605 1.280411604 0.890806298 1 1.176393412 1.241272598  
0.906322224 0.611581572 1 1.07223207 1.211162859 1.196151192  
1.097643788 0.879350705 1 0.844642991 0.877480077 1.260856306  
1.019658436 0.910710422 1 0.964444543 1.041606211 0.891996059  
0.429243283 1.084081176 0.84847964  
YDR308C "YDR308C::SRB7::Suppressor of RNA polymerase II, possible component  
of the holoenzyme" 1 1.00351081 1.187644607 1.031278603 1.548527251 1  
1.015948934 0.938892139 1.215654137 1.33397579 1 0.960798465  
1.032929237 1.115820898 1.10358424 1 1.002824398 0.657854083  
0.704762992 1 1.717011688 1.864934319 0.934765712 1  
0.892099632 0.677720238 0.998087942 1 1.550461522  
1.295061127 1.267141049 1 1.235050291 1.568369425 1.14773075  
2.148116988 1.410300008 1.385237183  
YGR025W YGR025W::YGR025W::molecular\_function unknown  
0.76756336 1.095783101 0.910441177 0.926206903 1.043462887  
0.910261229 0.814040088 1.003085845 0.864154759 0.67659971  
0.90458586 1 0.703559207 0.817609582 0.730435105 1  
0.943256433 0.59712832 1 0.989221259 0.857891498  
1.003190221 1.382902218 1.34066869 1 0.993441862 0.848931445  
0.953918065 0.705646276 0.606803717 1 1.265080647 0.736648578  
1.120201809 1.031302914 0.755663491  
YDR310C YDR310C::SUM1::Suppressor of mar1-1 (sir2) mutation 1  
0.848404245 0.90750103 1.316800559 0.835242905 1 1.054930132  
1.118469586 0.991360735 1.001544317 1 0.900913021 0.995297102  
0.916708836 1.119285694 1 0.674275254 1.670536433 1.044689931  
0.590318606 1 0.366538486 0.221216061 0.42640815 1  
1.197355026 1.297803056 1.346710748 1.754930146 1.401615536 1  
0.982047159 0.570474981 0.858710671 1.179712393 0.449758645 1  
0.640772553 0.513565744 0.734850374 0.49239056 0.603105231 0.525374421  
YGR027C YGR027C::RPS25A::Homology to rat S25 1 0.943094263  
1.108380326 0.658241614 1.388190817 1 0.759566332 0.741001939  
1.261099382 1.122055324 1 0.744712908 0.878325029 1.003012437  
0.816104599 1 0.928630864 0.375111132 0.308901218 0.432387276 1  
2.013151961 1.652372071 1.010751526 0.870809104 1 1.147702229  
1.039646536 1.042044935 1.082455832 1 1.169302997 1.896399339  
1.259065144 0.919418775 2.619957583 1 0.733553571 1.190037041  
0.857536077 1.127837118 1.155323229 1.439525903  
YDR312W YDR312W::SSF2::high copy suppressor of G beta subunit temperature  
sensitive mutation 1 0.637003113 0.612796277 0.870505266 0.960396083 1  
0.680946683 0.669633189 1.088736472 1 0.433074319 0.392808436  
0.328616808 1.034670999 1 0.432735604 0.34120953 0.900948071 1  
1.03025747 0.989594687 0.636136813 1.454984591 1 0.740264561  
0.69913699 0.565101325 0.785456053 1.028107922 1 0.894174469  
1.052877335 0.747836646 1.12259684 1.172368804 1 0.750427578  
0.829441006 1.001542089 1.30518188 0.650775019 0.767922225  
YGR029W "YGR029W::ERV1::Protein forms dimers in vivo and in vitro, contains  
a conserved YPCXXC motif at carboxyl-terminal, binds FAD as a cofactor, and

catalyzes the formation of disulfide bonds in protein substrates." 1  
1.140220906 1.394781519 1.070519391 1.70638816 1 0.893329215  
0.943320463 1.750691244 1 1.361364949 1.643012322 1.79076513  
1.510484048 1 1.027624926 1.934557145 0.979937071 1.419824161 1  
2.155054022 2.997821212 2.820029125 1.726661641 1 1.008156316  
1.179853789 0.948272968 0.827278271 0.960536949 1 1.15448627  
1.73851955 1.74739761 1.730965937 2.237035313 1 1.130435975  
1.620894544 1.305505829 1.503070255 1.403129122 1.327446012  
YDR314C YDR314C::YDR314C::molecular\_function unknown 1 1.14807491  
1.178085134 1.173082759 1 1.176197322 1.144558868 1.096866828  
1.113138377 1 1.096809421 1.323420711 1.289842113 1.085524646 1  
0.941470744 1 0.705939037 0.643064105 1  
1.066715418 0.961799111 1.060569887 1.006438748 1 0.84335021  
0.929689409 0.979487213 0.898320455 0.829431547 1 0.930623921  
1.154511891 0.944457573  
YGR031W YGR031W::YGR031W::molecular\_function unknown 1 1.077416147  
1.113060314 0.957927817 1 0.923253267 0.920352662  
1.092549346 1 0.905807283 1.07781018 1.189450579 1.221107604  
0.859050848 1  
1.092341951 0.741244041 1.081084511 1.053269317 0.908654611 1  
1.105462529 1.231792223 1.249904877 1.139829585 1.014853733 1  
1.037404369 1.589334538 1.168927089 1.293833369 1.071312977 1.175087415  
YDR316W YDR316W::YDR316W::molecular\_function unknown 1 0.536714765  
0.887361019 0.79549235 1.104044169 1 0.755625843 0.806238849  
0.777056253 0.915071686 1 0.720677516 0.736574892 0.856875806  
0.74808257 1 1.000561758 0.712891165 0.702287337 1.002468561 1  
1.550096121 1.673481896 1.200151833 1 1.180065624 1.241756901  
0.828538236 0.901042596 1.137983324 1 1.049983859 1.199229829  
1.019071094 1.005778626 1.275768003 1 1.133747845 1.010350117  
0.897289763 1.100663238 1.164234997 1.280162299  
YGR045C YGR045C::YGR045C::molecular\_function unknown 0.87790763  
0.807421952 0.811565297 0.866881273 0.987445406  
0.947854872 0.917485925 1.032331804 0.980426858 1.094509732 1  
0.465187617 0.711885176 0.318981745 1  
1.468034912 1.626306876 1.175622045 1.749906666 1  
1.650471908 1.276951626 1.670480065 1 1.14747983 1.240825308  
1.256871299 0.81433747 1.622380348 0.996460122  
YDR330W YDR330W::YDR330W::molecular\_function unknown 1 0.832070607  
1.235382386 1.087801909 0.900173387 1 1.190536704 1.30641816  
1.057553185 0.956544365 1 1.223361655 1.654165767 1.649048917  
1.238147714 1 1.606988519 1.341695001 2.398561784 1.736228142 1  
1.062824486 1.904805815 2.781375093 1.062698391 1 1.186726256  
1.339638888 1.325859449 1.153745924 1.402033618 1 1.208567137  
0.978066675 1.419499917 1.099216215 0.526629468 1 1.473369333  
1.089460693 1.475673051 1.04057931 1.255608758 0.800320314  
YGR047C YGR047C::TFC4::transcription factor tau (TFIIIC) subunit 131 1  
0.962077665 0.914684552 1 1.004761237 0.956914597  
1.106465838 1 0.870449163 0.956695408 0.714921641 1.163043992 1  
0.421428441 1 0.735002052  
0.92085347 0.996899513 0.849779786 0.872069473 1 1.093197308  
1.195275237 0.788673298 1.080044057 0.74914024 1 1.029474923  
1.035477556 0.982898223 0.709285494 0.91016734 0.87825089  
YDR332W YDR332W::YDR332W::helicase 1 0.847565288 0.905103571  
1.038751611 1.122508243 1 1.030739654 0.896132854 0.900627035  
1.023946125 1 0.796385643 0.902503534 0.874971117 1.003332653 1  
1.024763957 0.933720662 0.984952579 1 1.249139347 1.563618246  
1.379491827 1.551175214 1 0.87530708 0.820770006 0.80688852

0.80038618 0.975454575 1 0.831999838 0.898982812 1.087537185  
 0.834162017 1 0.846981673 0.774596634 0.893952692 0.88298329  
 0.891179371 1.403625311  
 YGR049W YGR049W::SCM4::Protein that suppresses ts allele of CDC4 when  
 overexpressed 1 1.058804423 1.053361804 0.800012722 0.942027768 1  
 0.89868002 0.895137532 1.051237434 1 0.818784982 0.845809466  
 1.177005175 0.91863627 0.728750621 0.677820775 0.585877373 1  
 0.770545607 0.904382029 0.885388151 1.14735091 1 0.509703648  
 0.43707309 0.41710567 1.192133982 0.918017219 1 0.190108945  
 0.222021355 0.789709069 2.086050025 1 0.267147159 0.328026717  
 0.846442782 1.081549861 0.979363133 0.929037055  
 YDR334W YDR334W::SWR1::Sick With RSC 1 1.050798262 0.935408857  
 1.109046499 0.676667151 1 1.242155136 1.181365156 0.781673579  
 0.745046595 1 1.066273342 1.028345657 0.51795323 0.908310149 1  
 0.900075334 0.615606401 0.721451583 0.820257441 1 0.771013093  
 0.82196503 0.881746138 0.789225404 1 1.018141015 0.9710991  
 0.918218174 0.924715893 1.039566485 1 1.008268781 0.972992848  
 1.024760929 0.94088438 0.912402258 1 1.048374234 1.124571772  
 0.984860263 1.281090921 0.96716046 2.064721427  
 YDR336W YDR336W::YDR336W::molecular\_function unknown 1 1.360145536  
 1.281855171 1 1.3881985 1  
 1.192058654 1.39588901 1.150514115 1.279685515  
 0.584502091 0.758938589 0.877142161  
 0.707228188 0.783400467 0.893718463 0.793361831 0.909118396  
 0.817419793 0.769449601 0.977419029 1 1.091329826 0.894250132  
 0.915841348 0.982322912 1.235678442  
 YLR287CA YLR287CA::RPS30A::Homology to mammalian S30 1 0.771330573  
 1.099641879 1.297823138 1 0.741543388 0.676020947  
 1.065391612 1 0.767285598 0.878893154 1.046769782 0.830076929 1  
 0.868185344 0.439764364 0.418833797 0.841797083 1 1.687832934  
 1.776338866 1.463423524 0.81474208 1 0.764054567 0.85439128  
 0.576951079 0.608788705 0.968627256 1 1.086900432 2.094317801  
 1.338399011 1.140444901 2.113425073 1 0.855351005 1.6308942  
 1.136114298 1.62846938 1.223296894 1.352839042  
 YAL058CA YAL058CA::KRE20::molecular\_function unknown 1 1.230003774  
 1.14479506 1.073370586 1.433667908 1 1.078466049 1.00050345  
 1.286925074 1.295412428 1 0.975331779 1.093875631 1.217335308  
 1.230466904 1 0.892620193 0.570472136 0.672904016 1.255232953 1  
 0.938996143 0.691483695 0.837412881 0.908527153 1 1.26194738  
 1.294505215 1.243869223 1.317878614 1.051607985 1 0.946941504  
 1.292335031 1.149056854 1.116194906 1.374640442 1 0.94277788  
 1.328519811 1.074415514 1.62616672 0.910196532 1.469297049  
 YDR242W YDR242W::AMD2::putative amidase 1 0.903359266 0.765366369  
 0.970469038 0.753031897 1 0.912179789 0.934231713 0.791073059  
 0.979489994 1 0.796940168 0.786039892 0.885028662 0.917728102  
 0.785524287 0.760300644 0.739910845 1 0.694160621 1.35032122  
 0.662359874 0.630266984  
 1.391585969 0.978333638 1.014300408  
 0.779305347  
 YDR244W YDR244W::PEX5::Essential for import of proteins with SKL-like import  
 signal into peroxisomal matrix 1 0.793927514 0.888135279 1.233091018  
 1 1.20614336 1.155656865 0.879509067 0.99243608 1 1.202338957  
 1.177612128 0.771983322 1.145749543 1 0.877771473  
 0.733847442 0.895244416 1 0.694614903  
 0.936319387 0.878605411 0.921653273  
 0.945878061 0.734978272 1 0.962124652 0.884711627 0.84557803  
 0.750600204 1.06651008

YGR051C YGR051C::YGR051C::molecular\_function unknown 0.953016124  
1.097820537 1.000506274 0.723833715 0.936760883  
0.96024512 0.946421152 1.10002564 1.106632033 0.961367191 1  
1.045442579 1.717036709 1.907820352 1 1.118970346 2.030189507  
2.398683496 1.330720338 1 0.419233335 0.54574467 0.433146259  
0.600744558 1 1.176324098 1.294273064 2.144236872 2.162845358 1  
0.858975314 0.836639264 0.843225912  
YGR053C YGR053C::YGR053C::molecular\_function unknown  
1.129327449 1.013232882 0.780919537 0.787539902 0.981308587  
1.159817999 1.098967999 1.68624069 1 1.520130539  
1.69937093 0.539136181 0.485948895 1 1.18299746  
1.398682309 0.925952753 1.097080995 1 1.087348451 1.772925744  
2.159531848 1.493168961 1 1.586865178 1.310950018  
1.848869385 0.941295842  
YDR338C YDR338C::YDR338C::molecular\_function unknown 1 0.860623091  
0.684663345 0.944720851 0.719808387 1 0.903740815 0.923420465  
0.65133075 0.744908919 1 0.859528186 0.734872795 0.54506626  
0.772459745 1 1.405571709 0.696903433 1.212838873 0.832039728 1  
1.212560885 1.242853874 0.611832847 0.796549385 1 1.025258557  
1.014992653 1.063071167 1.046249718 1.039769749 1 0.979964516  
0.635276272 0.78775531 1 1.06199668 0.861534978  
1.088024406 0.953489842 0.719062144 0.753912265  
YGR055W YGR055W::MUP1::high affinity methionine permease  
2.018079465 1.046573776 1.159517336 0.646119566 1.254314224  
1.396043552 0.771138383 0.889620662 1.786746616 1.397244136  
0.629857044 0.632426921 1 0.874084659 0.719493836 0.760293127  
0.539314066 1 0.884351576 0.333935119 0.363500251 0.988160033 1  
0.980299266 0.714570877 0.916229492 1.117087082 0.680451814 1  
1.161255623 0.522660143 0.486632205 0.635656751 0.867804486 1  
1.391655328 0.609743668 0.737004644 0.647918251 0.626891878 0.968440097  
YDR340W YDR340W::YDR340W::molecular\_function unknown 1 1.013927832  
1.504016464 1.111911412 1.646481937 1 1.013031675 0.941510238  
1.665334474 1.517025896 1 1.20616692 1.217359928 2.238283297  
1.130285234 1 1.180285313 0.978113413 0.994792517 1.228417013 1  
0.829901274 1.421063723 0.78891729 0.736451393 1 0.70876446  
0.744516556 0.695307995 0.731426025 0.888584 1 1.08122267  
1.923135281 2.376685779 3.062154962 3.090662285 1 0.978136621  
1.646515907 1.805109715 1.724411453 1.232574798 1.767009133  
YGR069W YGR069W::YGR069W::molecular\_function unknown 0.885295331  
1.007853919 0.741330784 0.996590449 0.698590083 0.695275824  
0.999893959 0.84635369 0.904348055 1.411627663 0.843888507 1  
1.471253902 1.398866807 1.81585636 1.585578298 1 1.545325193  
2.972063453 2.075586051 1.033595391 1.092186797 1.077789575  
0.965676772 1.232451124 1 0.639179636 1.147975034 0.822867914  
0.764887857 1.586019899 1 0.675938207 1.412703995 1.115724418  
0.943081576 1.558957607 1.166331183  
YDR354W YDR354W::TRP4::anthranilate phosphoribosyl transferase 1  
1.264348612 1.053943952 0.743691017 0.533078664 1 0.913133344  
0.866363128 0.813078068 0.66231681 1 1.90747171 1.018692559  
0.675809613 0.537600877 1 2.332495349 1.027084529 1.127014299  
1.048518081 1 2.21481618 1.408395144 1.080276645 0.815787658 1  
1.118239407 0.889501895 0.932410367 0.808715479 0.775698893 1  
1.389169219 1.287378352 1.004042155 0.745943255 1.016929953 1  
1.574298163 1.304225479 1.206897659 0.983775499 0.938172163 0.951803299  
YGR071C YGR071C::YGR071C::molecular\_function unknown 0.887757946  
0.797172586 1.096901233 0.972116189 0.893517235 0.927034388  
0.89829388 1.405766922 1.176181292 0.572597351 1.042623341 1



1.000066653 0.913307236 0.956077266  
1.128445079 1 1.188885861 0.935745226 1.02807352 0.685490982  
0.918017236 1 0.9942333 1.066531085 1.049121611 0.8090611 1  
1.29007417 1.26364698 1.088196461 0.653169031 0.955995289 1.113793689  
YDR356W YDR356W::SPC110::may be involved in connecting nuclear microtubules  
to the spindle pole body 1 1.678784923 1.715965914 1  
1.663482051 1.853610774 1  
0.978060669  
0.965871626 0.805700176 0.936777662 1 0.964568205 1.232691111  
0.991061944 0.896198811 1 0.856710857 1.128795305 1.047091183  
1.076866184 0.970191427  
YGR073C YGR073C::YGR073C::molecular\_function unknown 1 1.303906446  
1.148699555 1.031640668 1.367157415 1 1.027310536 0.888365661  
1.478543272 1.425270675 1 0.975108905 1.031891679 1.23284565  
1.111891051 1 0.928698562 0.482876035 0.777671913 0.937053616 1  
1.367325479 1.417112525 1.044212444 1 1.205343975 1.075562243  
1.050993621 0.912788273 1.110574753 1 0.893361645 1.352010137  
1.071515177 0.982963827 1.694670511 1 0.918113584 0.990293842  
1.00385035 0.613392453 1.062387524 1.503446415  
YDR358W "YDR358W::GGA1::Golgi-localized, gamma-adaptin homology, Arf-binding.  
Interacts with Arf1p and Arf2p in a GTP-dependent manner. Effector of Arf that  
facilitates traffic through the late Golgi." 1 0.760009403 1.051436226  
1.142917759 0.967030416 1 1.132951332 1.197030156 1.198489103  
0.82927081 1 1.233596866 1.687783041 1.500974714 1.224862304 1  
2.805461394 2.639961113 2.803105522 2.03043887 1 2.549787521  
1.767742765 1.851587882 1.676271812 1 1.426136272 2.229411756  
1.931946094 1.059419267 1.348662197 1 1.854693994 1.588646148  
1.830261936 1.366618968 1.265667926 1 1.992490515 1.642235875  
1.302565636 0.862422288 2.199945625 0.992082006  
YGR075C YGR075C::PRP38::RNA splicing factor 1 1.085808524 0.935930947  
1.142328268 1 0.857515866 0.793245157 1.274910712 1.127151279 1  
0.913331215 0.806944369 1.113138275 0.961925096 1 0.946882106  
0.774033766 0.849750601 1.092348003 1 1.243515412 1.303433519  
1.281817939 1.055263912 1 0.791073208 0.725783541 0.515902054  
0.731426387 1 0.865104694 1.172220606 0.829511628 0.773688898  
1.557283755 1 1.000479484 1.134566344 0.918078842 1.127406604  
1.226571952 1.443904019  
YDR360W YDR360W::YDR360W::molecular\_function unknown 1 0.869436934  
1 1.465243987 1.231011282 1 1.033415978  
1.456102111 0.637410185 1.023740951 1  
1 1.07549645 1.106711754 1.211224065 1.356648553  
1.156272504 1 0.7690876 0.731762119 1  
0.530925789 0.719420679 1.494528544 0.449954108 1.526054987 0.645334878  
YGR077C YGR077C::PEX8::Required for peroxisome assembly 1 0.938760248  
0.715037516 0.639551633 1 0.825347154 0.916247614  
0.641813576 1 1.057981579 0.867303994 0.754678944 0.708350819 1  
1.857378249 0.396986147 1.601376695 0.835173021 1 0.964770275  
1.218348806 0.821314201 1 1.229233457 1.117838334 1.176255425  
1.224117932 0.996419271 1 0.870381008 0.952550664 0.956230574  
0.740608769 0.733084791 1 1.542423609 1.472691582 1.495049673  
1.487191861 1.630372274 0.935166396  
YDR362C YDR362C::TFC6::91 kDa tau91 subunit of transcription factor IIIC  
(TFIIIC) 1 1.350641646 1.38621928 1.188550386 1.524195895 1  
1.48746053 1.187752405 1.346520338 1.460846475 1 1.226938514  
1.148269986 1.364540223 1.097443435 0.42821059 1  
1 0.881850092 0.933167542 0.999495774  
0.97841844 1.061547904 1 0.858719711 0.798632425 0.88045783

0.839542509 1.026447102 1 0.860750876 0.809875948 1.09053243  
 0.820740034 1.3441955 0.887882787  
 YGR079W YGR079W::YGR079W::molecular\_function unknown 1 0.689644796  
 0.62173688 0.689047384 1 0.633943072 0.66510821  
 1.232920887 1 0.328657987 0.322999374 0.329868472 0.970519356 1  
 0.423268809 0.463861046 0.530786242 0.575789218 0.437726777  
 0.496489242 0.254423812 0.801217746 1 0.494573449 0.430680285  
 0.564441309 1.04921156 0.605461311 1 0.348493584 0.373619219  
 0.351360295 0.76331577 0.401786511 1 0.421043682 0.354885064  
 0.773407495 0.504288841 0.446591681 0.514866912  
 YGR093W YGR093W::YGR093W::molecular\_function unknown 1 0.965074022  
 0.765898856 0.977258742 1.097977866 1 0.794844992 0.795950892  
 0.929612448 0.942576858 1 0.66340953 0.678490895 0.623102449  
 1.12154995 1 1.062489419 0.842299378 0.724992888  
 0.773006859 0.50278992 0.657716091 1 1.058505236 0.992646062  
 0.777830426 0.784843745 0.919859501 1 0.905026018 1.134886117  
 0.926278677 1.41523943 1.790185101 1 0.930096782 1.351392372  
 1.357770579 1.40048399 1.07763754  
 YDR364C "YDR364C::CDC40::Required for proper timing of DNA synthesis at all  
 temperatures and completion of DNA synthesis at a restrictive temperature in  
 both mitosis and meiosis, and for completion of meiotic recombination, meiosis I,  
 meiosis II and spores" 1 0.846030289 0.794301081 0.944290549 0.965160926 1  
 0.84788019 0.980398197 0.834228225 0.903900195 1 0.711357961  
 0.799545072 0.943034963 1.269569024  
 1 0.870024363 0.912915977 0.953840513 0.894202302  
 1.22338244 1 0.757121223 0.742264918 0.681733309 0.849912675  
 0.874396969 1 0.798466682 0.610875532 0.842933874 1.012002628  
 0.81832149 1.019226366  
 YDR378C YDR378C::LSM6::Like Sm-F protein 1 1.102705647 1.443024658  
 1.009975292 1.713336965 1 0.924519308 1.168031671 1.604221217  
 1.419191703 1 0.926806694 1.14918106 1.648404054 1.205380993 1  
 1.264933686 0.927665992 0.855439072 1.474006153 1 1.677473016  
 1.926874171 1.736738002 1.380758464 1 1.154947337 1.319699575  
 1.034133229 1.154571926 1.214963555 1 0.922649858 1.392491943  
 1.131187057 0.729656007 2.094644804 1 0.963700529 1.369456666  
 0.951546463 1.667597217 1.643570508 1.298550427  
 YDR380W YDR380W::ARO10 1 0.747609115 0.518420003 0.817351932  
 0.510541491 1 0.975120983 1.026124481 0.473087499 0.477262362 1  
 1.270312915 1.200444771 0.433315268 0.366079193 1 2.788003871  
 3.347261815 1.684887679 0.503857163 1 1.157655167 1.832925955  
 1.036741475 0.609495758 1 0.854208999 2.288132379 3.596749098  
 1.68006563 1.370706376 1 0.484749194 1.494169438 2.673241769  
 0.756385276 1.145470301 1 0.684850036 1.758776662 2.846570243  
 1.015651627 2.094922846 0.690867314  
 YDR246W YDR246W::TRS23::Trapp subunit of 23 kDa 1 0.792210508  
 1.103942433 0.921377755 1.080821742 1 0.848858403 0.95674418  
 1.144209405 1.097791245 1 1.051452678 1.553668735 1.11327962 1  
 1.614417659 1.337260425 1.148218441 1.304652313 1 1.747045345  
 1.787482134 1.929094576 1.004661299  
 1.320473256  
 0.836441049 1.085773768  
 YDR248C YDR248C::YDR248C::molecular\_function unknown  
 0.979495882 0.978969 0.776438313  
 0.765576309 1.040665272  
 1 0.710479143 0.795486307 0.961536332  
 0.683105764 1 1.073891389 0.950958474 1.1071559 0.864060533

0.80565184 1 1.131390697 0.935212216 0.590139322 1.640613857  
 0.518990262 1.269654842  
 YEL017CA YEL017CA::PMP2::May regulate plasma membrane H(+)-ATPase; nearly  
 identical to PMP1 1 2.380743478 1.400326741 1.271172293 1.806377907 1  
 1.390688195 1.103129161 1.533629562 1.534493387 1 1.351101592  
 1.147956842 1.015298708 1.036562007 1 1.017937274 0.746264322  
 0.76759242 0.846971321 1 0.755579628 0.607653287 0.611479455  
 0.560960284 1 1.391182657 1.272603567 1.819013513 2.09926438  
 1.27231689 1 1.059226002 1.341119911 1.119342982 0.726057044  
 0.662130724 1 1.208897297 1.158429181 1.291415337 0.795870951  
 2.069099439  
 YML010WA YML010WA::YML010W-A::molecular\_function unknown 1 1.75083973  
 1.626842657 1.179598719 1.116476139 1 1.352121385 1.369692784  
 1.354227922 1.56789478 1 1.156122079 1.23411188 1.555590064  
 1.025067109 1 0.900156311 0.632153859 0.789772812 1.03819252 1  
 0.794729394 0.66869527 0.49232598 0.394079944 1 1.135143245  
 0.982477714 1.062624556 1.175039428 1.014977837 1 0.794182636  
 0.924966552 0.763636144 0.838898803 1.012970762 0.961289514  
 0.958690643 0.795573245 1.428961209 1.094078978 1.017475036  
 YML013CA YML013CA::YML013C-A::molecular\_function unknown 1 1.255048906  
 1.1493902 1.088710584 0.699374605 1 1.190980718 1.338361439  
 0.847779745 1.036821807 1 1.348300525 1.419458367 1.423879555  
 1.002239522 1 1.310689711 1.278534459 1.226570352 1  
 1.051528316 1.140688988 0.682371093 1 1.104967866 1.037811408  
 1.286984884 1.132393295 1.016266763 1 0.892128268 1.026526759  
 1.093388656 0.854773559 0.649847875 1 0.982154203 1.036762682  
 1.086873316 0.697320748 0.786933782 1.091027549  
 YMR273C YMR273C::ZDS1::Negative regulator of cell polarity 1  
 1.272738699 1.412908708 1.300655938 1.414491003 1 1.39982457  
 1.280759624 1.132613903 1.174300779 1 1.410911113 1.468690478  
 1.481083771 1.267001755 1 0.715993096 0.682337865 0.622855173  
 0.909726217 1 1.043965389 1.336442106 1.211306571 0.749140651 1  
 0.564412487 0.531466979 0.638299858 0.44524537 1.033549418 1  
 1.453241672 0.6252336 0.828414612 0.732011275 0.325441857 1  
 1.031029127 0.814577028 0.679970191 1.266799463 0.472113727 0.954430189  
 YGR095C YGR095C::RRP46::Ribosomal RNA Processing 1 1.161592517  
 1.105400532 0.938238427 1.327322407 1 0.984355873 0.868281764  
 1.262544877 1.270217154 1 0.865902187 0.808556975 0.914068284  
 1.160270508 1 0.915506137 0.459340036 0.632591831 1.10204814 1  
 1.008806847 0.790827314 0.835160335 1.136474223 1 1.127327535  
 0.990490093 0.715016423 0.846994388 0.928439585 1 0.917668669  
 1.126903579 0.807355377 1.034151535 1.87120741 1 1.300301434  
 1.146722376 1.152737338 1.704179934 1.368344558 1.281037964  
 YGR097W YGR097W::ASK10::transcriptional activator of the SKN7 mediated 'two-  
 component' regulatory system 1 1.297061499 1.143252416 1.323053246 1  
 1.179789423 1.159997192 1.287574869 1.189121199 1 1.40075125  
 1.231729325 1.121499148 1.327436649 0.390584929  
 0.529696 1 0.985667078 1.025357178 1.043698699  
 1.200469299 0.981432873 1 1.000073743 0.920024525 0.825869487  
 0.912346861 0.674652561 1 1.069976707 0.792487957 0.932365911  
 0.696649482 0.792439695  
 YGR097W YGR097W::ASK10::transcriptional activator of the SKN7 mediated 'two-  
 component' regulatory system  
 1 1.246789957 0.876761488 0.999533159  
 1.101567118 1 1.076220905 1 1.120100455  
 1.019001415 1.311542507 1.273157293

YDR382W "YDR382W::RPP2B::Homology to rat P2, human P2, and E.coli L12eIA" 1  
1.460414002 1.540629088 0.830205962 1.261754568 1 1.032265036  
1.13229865 1.126897056 1.187628679 1 1.172056553 0.943958982  
1.039209639 0.860351467 1 0.815545256 0.337759561 0.231940241  
0.304330455 1 1.451106299 1.156584932 0.4177033 0.528579827 1  
0.914492098 0.774891184 0.80478761 1.143702624 0.940941705 1  
1.011044226 1.104499492 0.779066948 0.670769513 1.020750949 1  
0.784576494 0.515108735 0.612801361 0.787845118 0.619076164 0.884380232

YGR099W YGR099W::TEL2::Involved in controlling telomere length 1  
1.405394126 1.298163768 1.643736491 1.205804003 1 1.371173653  
1.318738551 1.32251358 1 1.081612858 1.359169566 1.010300419  
1.607288331 1  
1.114798739 0.951782469 0.873182884 0.98799707 1.065464168 1  
0.835786602 0.705460341 0.750636628 0.749915243 0.773267828 1  
1.070582735 0.948101204 1.106305688 0.831546357 1.093569444 0.978947659

YDR384C YDR384C::YDR384C::molecular\_function unknown 1 1.747577097  
1.17280243 0.891899557 1.030179901 1 1.096101832 0.995420549  
0.937797235 0.80968052 1 1.081329665 0.788243493 0.869757583  
0.757069388 1.253674455 0.41213711 0.342138096 0.48823113 1  
0.487711178 0.53741561 1 1.133897633 0.649685272 0.947292824  
1.274069072 0.929458414 1 0.71067559 0.945053578 1.075678033  
1.05176634 0.756176247 1 1.068698923 0.820317272 0.796408963  
1.399316242 0.458406695 0.916778372

YGR101W YGR101W::PCP1::putative mitochondrial rhomboid protease  
0.933315566 0.834753572 0.983968475 0.76653272 1.008536429  
0.877607245 0.886411659 0.9007719 1.030815383 0.878962796  
1.024832352 0.852699411 1 2.897153446 1.774935704 0.987308492  
0.623993528 1 0.935852174 0.980826549 1.062660606  
1.041265468 0.939282869 1 0.956693296 0.807089426 0.943875442  
0.549352607 0.75184461 1 1.096931675 0.833884203 0.849814983  
0.881619723 1.442152689

YDR386W YDR386W::MUS81::Mms and UV Sensitive; Mus81p and Rad54p are found together in a complex from whole-cell extracts 1 0.855354299 0.972876579  
1.348743262 1.122771896 1 0.999624915 1.161959319 1.221380792  
1.19792378 1 0.955946124 0.934925409 1.277041321 1  
1.059141547 1.22483787 0.477308466 1  
0.922906718 0.908556813 0.877810509 0.698034336 1.026524355 1  
1.01192341 1.301683115 1.17954271 1.679643327 1.672461268 1  
0.845686021 1.084649103 1.148530889 0.7007179 1.286414904

YGR103W YGR103W::NOP7::Nucleolar protein present in purified ribosome assembly intermediates. Required for rRNA processing; required for essential steps leading to synthesis of 60S ribosomal subunits. 1 0.995564183  
0.571854893 0.837581902 0.80408019 1 0.882323058 0.585453431  
0.879799296 0.810598681 1 0.670756525 0.31374108 0.16979162  
0.880010449 1 0.48145856 0.165811668 0.104377873 0.24445989 1  
0.709851556 0.138072549 0.063358152 0.377040494 1 0.935081423  
0.632131544 0.620134698 0.895413152 0.900655109 1 0.721298635  
0.4428992 0.42033316 0.598978641 0.927914417 1 0.804659615  
0.541216231 0.742382519 1.109334954 0.439087487 0.679484244

YDR388W "YDR388W::RVS167::The BAR adaptor proteins encoded by RVS167 and RVS161 form a complex that regulates actin, endocytosis, and viability following starvation or osmotic stress." 1 0.666760233 0.802779669 0.671510058  
0.399346242 1 0.896072064 1.046778384 0.585533948 0.543854574 1  
0.783009789 0.980899275 0.966616594 0.576261374 1 1.337610515  
1.234187089 1.328069335 1.016918891 1 1.112465146 0.849721558  
0.915384433 0.941902643 1 0.815497344 0.941804216 1.084208206  
0.933742316 0.933046838 1 1.190095843 1.019951792 1.066564899

1.340924247 0.765563256 1 0.915955022 0.902583061 1.168972131  
0.627437516 1.179417504 0.837096518  
YGR117C YGR117C::YGR117C::molecular\_function unknown 0.989954773  
0.764146882 1.027576207 0.957431668 1.012168639 0.944608536  
1.073233803 0.778108354 0.944009847 0.797518627 0.683611085  
0.866405256 1 0.706588097 0.772081398 0.649182745 0.74465205 1  
0.964093324 1.408850071 1 0.918262617 1.033254647 0.978397549  
0.899909578 1.102610466 1 0.949979142 1.018879429 0.9668962  
0.804864588 1.089455315 1 0.937158153 0.971853717 1.031017026  
1.101028945 1.325416964 1.028858158  
YDR402C YDR402C::DIT2::Disp. for spores & spore viab. - required for  
dityrosine biosynth. & dityrosine accumul. in outer spore wall (s.w.); s.w.  
matur. & resist. to ether & lytic enz. mRNA trans. mid/late during s.w.  
formation 1.153823795  
0.754725616 1.234005689 0.241986151  
0.396086095 0.144356706 1 0.91282705  
1.005436424 1.440115796 1.250758681 0.674900928 0.837313916  
  
YGR119C "YGR119C::NUP57::Forms complex with Nsp1p, Nup49p, and Nic96p at  
nuclear pore; this complex participates in nucleocytoplasmic transport; in vitro,  
Nsp1p, Nup49p and Nup57p form a 1:1:1 stoichiometric complex to which Nic96p can  
also bind" 1 0.881764741 0.943566198 0.99394271 0.830484495 1  
1.059857736 0.954651486 1.146081 0.849905819 1 0.912334626  
0.933620358 0.705482441 1.081180423 1 0.738708752 0.702786034  
0.597379211 0.863142922 1 0.865687637 0.639455044 0.779527907  
1.097385753 1 0.854410805 0.896022317 0.898152888 0.883033746  
1.034103749 1 0.754999265 0.788784615 0.778510103 0.69055869  
0.862265941 1 0.893615625 0.642905008 0.947086957 0.920369651  
0.917973599 0.813454714  
YDR404C YDR404C::RPB7::dissociable subunit of RNA polymerase II 1  
1.517406875 1.427166726 0.964308346 1.418725671 1 1.195436135  
1.13833092 1.274159359 1.177841652 1 1.239143134 1.189479364  
1.505961119 0.868282642 1 1.065980289 0.407652041 0.705262185  
1.119464815 1 1.210241035 1.563492446 1.531044542 1.053577692 1  
1.223887747 0.898340588 0.848803778 0.931942114 0.916598553 1  
0.842428256 0.999205658 0.578066138 0.501643867 1.108746704 1  
1.062712909 1.166275055 0.861465216 1.490791045 1.008293683 1.498192634  
YGR121C YGR121C::MEP1::belongs to a ubiquitous family of cytoplasmic  
membrane proteins that transport only ammonium (NH(4)(+) + NH(3)). 1  
0.856764186 0.807216017 0.781668945 0.736834341 1 1.086250685  
0.962267996 0.83697042 0.732374107 1 1.237322903 0.96013542  
1.012369074 0.762285409 1 1.650575686 1.040876986 1.586686992  
1.099064648 1 1.560629588 1.270140645 1.616971252 1  
1.035160947 0.941325522 1.111794592 1.02435006 0.971352681 1  
0.722787938 0.707060648 0.778229561 0.85376304 0.623387208 1  
0.745471698 0.822719004 0.98135025 0.764107447 1.021463433 1.06651008  
YGR123C YGR123C::PPT1::serine/threonine phosphatase 1 1.339420808  
0.816719699 1.18464341 1.053636438 1 1.086952829 1.043758341  
1.124135557 1.053812696 1 0.841849411 0.549759413 0.493261588  
1.050574065 1 0.431742849 0.388748588 0.261644981 0.3701001 1  
0.671231182 0.321378538 0.665595158 1 0.827662485 0.58619877  
0.65575153 1.020532589 0.78930871 1 0.877252348 0.587238098  
0.562322034 0.664760059 0.837155783 1 0.788528584 0.548352627  
0.711846128 0.872642162 0.60354441 0.852857756  
YDR406W YDR406W::PDR15::similar to Pdr5p and Pdr10p 1 1.697909859  
1.406814577 1.459343087 1 1.448576642 1  
1.169930098 1.335326768 1.471872815

|             |                                                              |             |             |             |             |             |
|-------------|--------------------------------------------------------------|-------------|-------------|-------------|-------------|-------------|
|             | 1                                                            |             | 0.709955236 | 0.865910285 | 1.172690679 |             |
| 1.079948003 | 1                                                            | 0.971081    | 0.743217121 | 0.486012743 | 1.009430325 |             |
| 0.67143018  |                                                              | 0.820391275 | 0.774656265 | 1.060416705 | 0.975763195 |             |
| 0.717621707 | 1.106788787                                                  |             |             |             |             |             |
| YGR125W     | YGR125W::YGR125W::molecular_function                         | unknown     | 1           |             | 1.225339343 |             |
| 0.917633887 | 1.275742139                                                  | 0.918055582 | 1           | 1.268806376 | 1.278407711 |             |
| 0.915553668 | 0.883181592                                                  | 1           | 1.114008861 | 1.093886546 | 0.724310895 |             |
| 1.256312329 | 1                                                            | 1.419631085 |             | 1.088871146 | 0.570093881 | 1           |
| 0.844216368 | 0.520637024                                                  |             | 0.354153094 | 1           | 0.980740867 | 0.963711323 |
| 0.81784742  | 1.157360126                                                  | 0.924253699 | 1           | 0.886112204 | 0.64592689  |             |
| 0.604029212 | 0.774454842                                                  | 0.816818894 | 1           | 1.061329031 | 0.855506191 |             |
| 1.149953396 | 1.022404415                                                  | 0.965993409 | 0.684737973 |             |             |             |
| YDR408C     | YDR408C::ADE8::glycinamide ribotide transformylase           |             | 1           |             |             |             |
| 0.989632809 | 1.068491736                                                  | 1.051561839 | 0.945497355 | 1           | 1.087906252 |             |
| 1.049928623 | 1.123370301                                                  | 0.857881608 | 1           | 1.054084005 | 1.044876079 |             |
| 0.861919412 | 0.959548324                                                  | 1           | 1.322967243 | 1.157484998 | 0.815067843 |             |
| 0.809415388 | 1                                                            | 2.628902562 | 2.595101247 |             | 1.30196447  | 1           |
| 0.922215862 | 0.97359731                                                   | 0.836924384 | 0.84547383  | 1.160797094 | 1           |             |
| 1.111870654 | 0.945430537                                                  | 0.700784806 | 0.923885366 | 1.429174929 | 1           |             |
| 1.037298009 | 0.89374022                                                   | 1.013736155 | 1.224276902 | 1.400166685 | 1.133057482 |             |
| YDR410C     | YDR410C::STE14::farnesyl cysteine-carboxyl methyltransferase |             |             |             |             | 1           |
| 1.347348779 | 1.23844744                                                   | 0.969743123 | 1.34209912  | 1           | 1.013122038 |             |
| 1.027024298 | 1.168577007                                                  | 1.084373958 | 1           | 1.392795552 | 1.096501241 |             |
| 1.331500575 | 0.918704387                                                  | 1           | 1.250083976 | 0.822328154 | 0.879721245 | 1           |
| 1.310338028 | 1.265523773                                                  | 1.24898416  | 1.046910772 | 1           | 1.149801841 |             |
| 1.233929812 | 1.120989717                                                  | 1.191185502 | 1.003283537 | 1           | 1.133696105 |             |
| 1.652955568 | 1.495463621                                                  | 1.117212452 | 1.45054078  | 1           | 1.182261182 |             |
| 1.499128271 | 0.967224269                                                  | 1.466627331 | 1.102244204 | 1.091027549 |             |             |
| YDR412W     | YDR412W::YDR412W::molecular_function                         | unknown     |             |             | 0.972716756 |             |
| 0.966856456 | 0.888926089                                                  | 1.414610256 |             | 0.795228543 | 1.11563317  |             |
| 1.242743104 |                                                              | 0.729407383 | 0.570109436 | 0.745545121 | 0.94178743  | 1           |
| 0.470191271 | 0.265624569                                                  |             | 1           | 0.520710735 | 0.411716128 |             |
| 0.727550422 | 1                                                            | 0.77987351  | 0.647676694 | 0.577696029 | 0.661178864 |             |
| 0.859969855 | 1                                                            | 0.829393544 | 0.98532173  | 0.716487308 | 0.993422006 |             |
| 1.973923448 | 1                                                            | 0.713547588 | 0.860295959 | 0.90554545  | 1.548815981 |             |
| 0.778582289 | 0.951803299                                                  |             |             |             |             |             |
| YGR127W     | YGR127W::YGR127W::molecular_function                         | unknown     | 1           |             | 1.000489745 |             |
| 0.9912026   | 0.824619795                                                  | 1.030830167 | 1           | 0.85113934  | 1.009490985 |             |
| 0.967748859 | 0.969071106                                                  | 1           | 1.207126393 | 1.40345357  | 1.720051628 |             |
| 1.113279664 | 1                                                            | 2.8295804   | 1.945905036 | 2.739078415 | 2.335695014 | 1           |
| 1.662271953 | 1.255755047                                                  | 2.153045331 | 1.501935148 | 1           | 1.272188035 |             |
| 1.401379992 | 1.360662339                                                  | 1.137606034 | 1.166214615 | 1           | 1.137476016 |             |
| 1.22688096  | 1.277588217                                                  | 1.174606856 | 1.417983813 | 1           | 1.309632241 |             |
| 1.204734709 | 1.080812042                                                  | 1.23636081  | 1.405803998 |             |             |             |
| YGR141W     | YGR141W::VPS62                                               |             | 1           | 1.041462332 | 1.05339268  | 1.097490791 |
| 0.877859023 | 1                                                            | 1.014489256 | 1.163792749 | 1.080257417 | 1.063420082 | 1           |
| 1.122011398 | 1.468758953                                                  | 1.143015233 | 1.335081472 | 1           | 1.557650624 |             |
| 1.025761204 | 1.190116503                                                  | 0.958350847 | 1           | 1.282137253 | 1.04122341  |             |
| 0.923007825 | 0.827259416                                                  | 1           | 1.079919992 | 1.535469231 | 1.404158127 |             |
| 1.234008495 | 0.954957947                                                  | 1           | 1.187907087 | 1.064732594 | 1.25863852  |             |
| 1.389523055 | 0.850471136                                                  | 1           | 1.155809644 | 0.960859791 | 1.1124938   |             |
| 0.644807349 | 0.833538138                                                  | 0.654966775 |             |             |             |             |
| YDR426C     | YDR426C::YDR426C::molecular_function                         | unknown     | 1           |             | 1.047588547 |             |
| 1.644219815 | 1.132303773                                                  | 1.613947069 | 1           | 1.139349523 | 1.101276712 |             |
| 1.349347953 | 1.258263693                                                  | 1           | 1.441936869 | 1.528641488 | 2.291404157 |             |
| 1.28164873  | 1                                                            | 2.204603483 | 1.802413754 | 1.365277352 | 2.041347963 | 1           |
|             | 2.682497692                                                  | 1.247853465 | 1           | 1.14449687  | 1.137969552 | 0.770925493 |

0.618817512 0.904995326 1 1.256096446 1.940346704 1.236395202  
 0.969141479 2.143188371 1 1.590267689 2.13008478 1.377352483  
 2.235255588 1.92160786 1.34145592  
 YGR143W YGR143W::SKN1::Involved in (1->6)-beta-glucan biosynthesis 1  
 1.064296477 0.900245092 1.241410033 0.783597147 1 1.106594211  
 1.31513549 0.918855571 0.796409179 1 1.12320433 1.21396872  
 0.673817391 1.143039023 1 0.944822756 1.250559975 1.030048962  
 0.629235078 1 1.091546987 0.634215382 0.814169966 0.773987883 1  
 0.950070284 0.942815452 1.200519288 1.287725169 0.887416633 1  
 0.899507622 0.534437675 0.681170324 0.96149842 0.657185277 1  
 0.930126893 0.668343994 1.060306741 0.71747767 1.109408434 0.651464271  
 YDR428C YDR428C::YDR428C::molecular\_function unknown 1.111852157  
 1.110347577 0.872153848 1.397967706 0.900781653 0.844655751  
 1.1593575 1.177074685 0.786072076 0.848289019 1.103126311  
 0.897732909 1 0.749974792 0.610469035 0.652258164 1.014757186 1  
 1.349878644 1.684288857 1.087445084 1.384100097 1 1.072828999  
 1.176352105 1.008206702 0.894686461 0.851898725 1 1.076545385  
 1.314571432 1.079759683 0.883608192 1.895951352 1 1.110219897  
 1.194115374 0.884075476 1.306996518 1.238854046 1.332699689  
 YGR145W YGR145W::ENP2::Essential Nucleolar Protein 2 1 1.06021647  
 0.772877361 0.97004168 0.867427498 1 0.8317691 0.74340091  
 0.909033376 1.014109817 1 0.622875556 0.416208291 0.413303334  
 1.209166034 1 0.412619385 0.320114005 0.36997499  
 0.695007702 0.376148349 1 0.682895622 0.445315744  
 0.440131275 0.66814577 0.717500356 1 0.911834509 0.617738907  
 0.408898371 1.167515354 1.299611095 1 0.678365025 0.633647479  
 0.973115803 1.211333429 0.374438536 0.818708442  
 YDR430C YDR430C::CYM1::CYtosolic Metalloprotease 1 0.732680255  
 0.887257065 0.991843739 0.405744349 1 1.026217505 1.14379091  
 0.751761199 0.638694874 1 0.955161878 0.957268907 0.747105552  
 0.662480951 1 0.766452376 1.021956294 1.036117289 0.964822613 1  
 1.149181325 1.349532803 0.914998665 1 0.912917783 1.003093065  
 1.076929083 0.951831823 0.891770687 1 1.262876957 0.807234285  
 0.92712415 0.745914202 0.686933103 1 0.99570143 0.842421676  
 0.830973018 0.482224444 1.08815841 0.821335332  
 YGR147C YGR147C::NAT2::Transfers acetyl group from acetyl coenzyme A to the  
 N-termini of proteins beginning with methionine 1 0.95235323 0.932574852  
 0.981809456 1.057176509 1 0.846900256 0.885534814 1.352427977  
 1.224107953 1 0.852253103 0.805809618 0.943353124 1.165814375 1  
 1.453824949 0.914885745 1.166755734 1.397344001 1 1.276888879  
 0.879240525 1.023350721 0.929070435 1 1.310031201 1.458885728  
 1.194730613 1.425619898 1.08808812 1 1.126785504 1.261806258  
 1.001435317 0.993679567 1.489916844 1 1.165560606 1.060891472  
 0.873769221 1.023903423 0.895719433 1.01222136  
 YDR432W "YDR432W::NPL3::involved as a protein carrier in mRNA export,  
 involved in mitochondrial protein targeting" 1 0.900820572 0.791059785  
 0.754551031 0.458304789 1 1.020085311 1.202478048 0.56692232  
 0.571051237 1 1.06753656 0.972881239 0.76774245 0.486110345 1  
 1.152526384 1.159446254 1.273366253 0.414134724 1 0.709377305  
 0.529040106 0.427529417 0.490568914 1 0.828738037 0.884747653  
 0.989349092 0.879019432 0.67901899 1 0.692264416 0.57663608  
 0.682598918 0.551607342 0.331982534 1 0.868577388 0.623891248  
 0.928938228 0.475415939 0.917695327 0.616439293  
 YGR149W YGR149W::YGR149W::molecular\_function unknown 1 1.525145383  
 1.204596101 1.209418761 1.191702206 1 1.435798905 1.335684225  
 1.294982659 0.916791841 1 1.503969528 1.566600756 1.482687583  
 0.942066588 1 2.040144825 2.454906557 2.365118131 1.13077254 1

1.407473077 1.20228188 1.401388529 1.115349991 1 1.247655952  
1.583279426 1.470766308 1.090889749 1.044986357 1 0.912333886  
1.179030583 1.492309805 0.741712128 1.33862683 1 1.037022494  
0.989730608 1.048893586 0.997511204 1.806801978 1.294172311  
YDR434W YDR434W::GPI17::Glycosyl Phosphatidyl Inositol 17 1  
0.935640847 0.821954531 1.000365526 0.94008351 1 0.941488951  
0.874578517 0.877604766 0.865716492 1 0.899041695 0.873148724  
0.691111529 0.967880508 1 1.23039727 1.032937873 1.039299521  
1.303439788 1 1.427788385 1.325322682 1.004780781 1.074287193 1  
0.952455657 1.026554642 1.00164548 0.986569522 0.898624226 1  
1.048733928 1.146876797 1.129641274 0.933140161 0.945129893 1  
1.18079894 1.165477156 1.087898583 0.989119173 0.959854187 0.992082006  
YGR151C YGR151C::YGR151C::molecular\_function unknown 1 0.955714879  
1.379510607 1.181925595 1.891360477 1 1.11164117 1.01696434  
1.962825069 1.672975276 1 0.798129014 0.834048711 1.28210594  
1.480488186 0.669184787 0.685352148 0.922825634 1  
1.073063877 0.940360887 0.611819451 0.876079453 1 0.74689256  
0.798068693 0.525624943 0.441695618 0.91463699 1 0.800770498  
1.254363765 1.033465192 1.248440277 1.400622272 1 1.053758247  
0.974524753 1.214762685 1.342647851 1.466670158  
YGR165W YGR165W::YGR165W::molecular\_function unknown 1 1.737627003  
1.48736982 1.534337756 1.605718255 1 1.410838284 1.417790228  
1.602406803 1.139078437 1 1.341505772 1.178714932 1.228906571  
1.399842941 1.329993183  
1 1.185136127 1.188763872 1.124631894 0.960561061 1.157448197 1  
1.193400682 1.168877447 1.128944914 0.743638685 0.914151653 1  
1.088361168 0.980223033 0.901999338 1.240382891 1.3323896 1.304679768  
YDR436W YDR436W::PPZ2::serine-threonine phosphatase Z 1 0.959043164  
0.996106379 1.16410928 0.839238939 1 1.121092655 1.280629333  
0.810232009 0.821209507 1 1.369512019 1.261872717 1.173636398  
0.960503092 1 2.238960928 1.538438165 2.631261711 1.076731691 1  
1.244833238 1.221052071 1.026910406 1 1.168544806 1.243604706  
1.210949654 1.055996389 0.863522707 1 0.991477638 0.825955706  
0.84008879 0.764427203 0.751567566 1 1.140550229 1.046073207  
0.941228655 0.785099971 1.133060553 0.774927232  
YGR167W YGR167W::CLC1::Clathrin light chain 1 0.839021886 1.169587183  
1.001318405 1.317152525 1 0.989488803 1.040917605 1.350699205  
1.154005053 1 0.811057977 1.100089203 1.525255911 0.95862574 1  
1.387141314 1.280252807 1.455277207 1.50547379 1 2.025175646  
1.562689424 2.084647018 1 1.024309366 1.334372906 1.029175209  
0.688021401 1.024007756 1 1.191798303 2.089091632 1.872330061  
1.357020846 1.962655916 1 1.302516113 1.568629787 1.166247893  
1.519592984 1.955165272 1.281913524  
YDR450W YDR450W::RPS18A::Homology to rat S18 and E. coli S13 1  
0.992423184 1.0227651 0.717722418 1.359421656 1 0.840072118  
0.785153912 1.090893646 1.033681788 1 0.718915496 0.747405887  
0.632885314 0.756935719 1 1.105894113 0.530608158 0.301424858  
0.941287295 1 1.421044232 0.98531702 0.520920347 0.849871448 1  
1.080214392 0.923620847 0.938759657 0.989763166 1.39528187 1  
1.263794727 2.12438791 0.898858416 0.595450434 1.630585141 1  
1.56518735 1.475466811 1.027938991 2.531247639 1.319877817 1.271406067  
YGR169C YGR169C::PUS6::RNA:Psi-synthase 1 0.955911255 1.033853287  
1.160932401 1.145143486 1 0.966481061 1.012044138 1.368768041  
1.298073982 1 0.894478112 0.910560406 0.92672775 1.17377051 1  
0.65256627 0.926519917 0.79509125 1 1.002190667 0.959090066  
0.900837759 1.263345958 1 0.929528867 1.058170721 0.506606375  
0.940988837 0.962256883 1 0.950782124 1.116420562 1.064409387



0.903543354 1.566036811 1 1.083820898 1.033083204 0.978039215  
 1.037776455 1.287177129 0.822210945  
 YDR452W YDR452W::PPN1::Phosphate metabolism; transcription is regulated by  
 PHO system 1 1.184111297 1.116327718 1.269053859 1 1.167336973  
 1.054938998 1.282414101 1 1.267234668 1.362436726  
 1.06870691 0.656154764 0.725160671 0.717906098 1  
 1 0.785244073 0.952354083 1.06141839 1.169221503  
 1.121564014 1 0.829875217 0.975783648 0.862998137 0.927020509  
 0.785050292 1 0.894128213 0.756794327 1.041349857 0.930864795  
 0.92791021 1.186470537  
 YDR454C YDR454C::GUK1::guanylate kinase 1 1.094658876 1.238986339  
 0.816381967 1.338146225 1 0.966052086 0.92523518 1.307530444  
 1.22270843 1 0.857480487 1.033208282 0.985654115 1.061835278 1  
 0.954691068 0.539002906 0.536222713 0.856000122 1 1.658556649  
 1.644658022 1.182806939 1.275693751 1 1.267311355 1.372038092  
 1.201071594 1.32478464 1.18850443 1 1.188191541 1.766356018  
 1.064963897 0.873741243 1.564315619 1 1.166684242 1.415656045  
 0.970818974 1.575366995 1.03229744 1.414132768  
 YDR456W YDR456W::NHX1::Required for intracellular sequestration of Na+ 1  
 1.091508617 0.923872655 0.988017585 0.989946369 1 1.126313644  
 1.054222163 0.938643041 0.821122293 1 1.258182092 1.085691458  
 0.71434249 0.85386947 1 1.902703701 1.926303986 1.973786412  
 1.006351595 1 0.806189242 0.562477769 0.514459331 0.584296563 1  
 1.476934961 1.539535553 2.038318389 1.414056093 1.043158829 1  
 1.172096773 1.343587015 1.195046303 0.950212316 1.126648684 1  
 1.21968728 1.217924092 1.115497554 1.043587151 0.898981305 1.091027549  
 YGR171C YGR171C::MSM1::mitochondrial methionyl-tRNA synthetase 1  
 0.992191802 1.007177663 1.194347722 1.016428324 1 1.131081745  
 1.218221015 1.317014723 1 1.123652006 0.991648744 0.92095459  
 1.27868853 1.019134047 1.133069465 0.98015038 0.863687801 1  
 1.368680985 1.167626681 0.998939162 1.547192232 1 0.945362683  
 0.907219642 0.989153944 1.012642344 0.956771706 1 0.972358619  
 0.863002467 0.93527239 0.938846433 1 1.123714752  
 0.765295387  
 YGR173W YGR173W::YGR173W::molecular\_function unknown 1 1.000933298  
 0.77330661 0.840426469 0.847927119 1 0.792844298 0.703330141  
 0.955283205 0.928285244 1 0.628105515 0.5041297 0.38450209  
 1.028744492 1 0.567923468 0.314085009 0.404011398 0.834484753 1  
 0.760540147 0.292867218 0.434962874 0.920560422 1 0.948869358  
 0.801234529 0.852890668 0.886884999 0.855760433 1 0.946713321  
 0.870947198 0.655066903 0.84610043 1.244466255 1 0.878763263  
 0.787344069 0.980994967 1.065851786 0.664091813 0.933415171  
 YDR458C YDR458C::YDR458C::molecular\_function unknown 1 0.895233346  
 1.013072009 1.128077139 1.378499335 1 1.040647613 1.026626551  
 1.191124809 1.038200624 1 0.81089347 0.920060684 0.97147698  
 0.940782973 1 1.294519663 0.919942626 1.39399964 1.055886032 1  
 1.1790077 1.458327377 1.269429597 0.768617576 1 0.859514338  
 1.122461481 0.918639869 0.824447708 0.978086701 1 1.21786086  
 1.272658365 0.977321341 0.989658231 1 0.932813757 1.155397752  
 1.046205303 1.00413835 0.983119769 0.835345293  
 YGR175C "YGR175C::ERG1::squalene epoxidase; an essential enzyme in the  
 ergosterol-biosynthesis pathway; catalyzes the epoxidation of squalene to 2,3-  
 oxidosqualene and is the specific target of the antifungal drug terbinafine." 1  
 1.025375246 0.62666156 0.897429557 0.644568511 1 0.958376083  
 0.879950822 0.64332495 0.784803067 1 0.607550607 0.510446765  
 0.467658992 0.877207304 1 0.621477397 0.42832468 0.573608753  
 0.699788966 1 0.510371263 0.157189129 0.255290112 0.820674391 1

|             |                                                                            |             |             |             |             |
|-------------|----------------------------------------------------------------------------|-------------|-------------|-------------|-------------|
| 0.483531265 | 0.322338161                                                                | 0.424453352 | 1.564984928 | 0.846308471 | 1           |
| 0.303569934 | 0.222153293                                                                | 0.201874042 | 0.774045972 | 0.943592802 | 1           |
| 0.465228436 | 0.328059528                                                                | 0.860506934 | 1.312911639 | 0.853995269 | 0.750409762 |
| YDR460W     | YDR460W::TFB3::Transcription/repair factor TFIIH subunit                   |             |             |             | 1           |
| 0.842651499 | 1.082453195                                                                | 1           | 0.954161588 | 1.018642752 |             |
| 1.281371349 | 1                                                                          | 0.91949566  | 1.293923937 | 1.285742997 | 1.155802662 |
| 1.314899136 | 1.145122607                                                                | 1.156811601 | 1.594117269 | 1           | 1.26870884  |
| 1.556473917 | 2.085088351                                                                | 1.205286288 |             | 0.975778177 | 1.060301906 |
| 0.951727064 | 0.759161558                                                                | 1.069782925 | 1           |             | 1.213909159 |
| 1.14756112  | 1.245430681                                                                | 1           | 1.485287424 | 1.200533056 | 1.177161219 |
| 1.543803555 | 1.409243253                                                                | 0.919405158 |             |             |             |
| YGR189C     | YGR189C::CRH1::congo red hypersensitive                                    |             |             |             | 1           |
| 0.638824849 | 0.845737085                                                                | 0.527823733 | 1           | 0.822144812 | 0.843913996 |
| 0.64359396  | 0.733359824                                                                | 1           | 0.764444408 | 0.655043261 | 0.554474561 |
| 1.095583484 | 1                                                                          | 0.468955727 | 0.414923436 | 0.389642981 | 0.841059288 |
| 0.43508919  | 0.333690535                                                                | 0.328798739 | 1.36766602  | 1           | 0.997672755 |
| 0.7716805   | 1.360421908                                                                |             | 1.164633593 | 1           | 0.644071456 |
| 0.713681323 | 0.53461941                                                                 | 0.518003372 | 1           | 0.708523876 | 0.697701574 |
| 1.060850019 | 0.744454697                                                                | 0.641095565 | 0.939544512 |             |             |
| YDR474C     | YDR474C::YDR474C::molecular_function unknown                               |             |             |             | 1           |
| 1.149268755 | 1.025627917                                                                | 0.880916748 | 1           | 1.057833486 | 1.225365613 |
| 1.180733622 | 1.026212176                                                                | 1           | 1.146703799 | 1.314066963 | 1.380549141 |
| 0.994603692 | 1                                                                          | 1.429699358 | 1.270031536 | 1.626126501 | 1.387878527 |
| 1.179551161 | 1.577308142                                                                | 1.628713046 | 0.574147996 | 1           | 1.179869498 |
| 1.218920034 | 1.074795699                                                                | 0.878062738 | 1.005070591 | 1           | 1.138426153 |
| 1.051401792 | 0.839244928                                                                | 0.87499317  | 0.748795565 | 1           | 1.116007976 |
| 0.978020859 | 0.974935867                                                                | 1.04465591  | 0.941687474 | 1.374729726 |             |
| YGR191W     | YGR191W::HIP1::histidine permease                                          |             |             |             | 1           |
| 0.786350184 | 0.499127357                                                                | 1           | 0.731410457 | 0.775139992 | 0.568492522 |
| 0.700728584 | 1                                                                          | 0.976274682 | 0.627969662 | 0.335446705 | 0.607593645 |
| 0.98421418  | 0.63815998                                                                 | 0.741376548 | 0.400473753 | 1           | 0.975839461 |
| 0.610740922 | 0.563363349                                                                | 0.985128749 | 1           | 1.100934918 | 0.855129289 |
| 1.120420962 | 1.574478965                                                                | 0.906037566 | 1           | 0.679570523 | 0.531337258 |
| 0.588937925 | 0.661584646                                                                | 0.486357773 | 1           | 0.754520554 | 0.613945821 |
| 0.704484496 | 0.682396348                                                                | 0.692393061 | 0.647961768 |             |             |
| YDR476C     | YDR476C::YDR476C::molecular_function unknown                               |             |             |             | 1           |
| 1.150310311 | 0.712894166                                                                | 0.533242542 | 1           | 1.053653872 | 1.018920975 |
| 0.828173755 | 0.846851061                                                                | 1           | 1.916019856 | 2.125376997 | 0.825419117 |
| 1.45936982  | 1.550490899                                                                | 1.802665494 | 1.441702588 | 1           | 1.003507721 |
| 1.306784551 | 1.200598                                                                   | 0.729654725 | 1           | 1.474062238 | 1.521883974 |
| 2.334521565 | 1.70592674                                                                 | 1.27067723  | 1           | 1.222237201 | 1.887588461 |
| 1.92606716  | 1.524631406                                                                | 0.645027732 | 1           | 1.239589213 | 1.252335278 |
| 1.271161995 | 0.728931521                                                                | 0.854929549 | 0.772300393 |             |             |
| YGR193C     | YGR193C::PDX1::Plays a structural role in pyruvate dehydrogenase complex   |             |             |             | 1           |
| 0.713997191 | 0.624553442                                                                | 0.805083999 | 0.715225665 | 0.772833358 | 1           |
| 0.880155942 | 0.783650892                                                                | 0.699881483 | 0.637444451 | 1           | 0.715353859 |
| 0.851650177 | 1                                                                          | 1.526522301 | 1.225146028 | 1.398368301 | 1.325238477 |
| 0.962753549 | 1.338714466                                                                | 1.123290021 | 0.875330145 | 0.866308644 | 1           |
| 1.318908799 |                                                                            | 1.159659433 | 1.195592879 | 1.203219103 | 1           |
| 1.447480288 | 1.146298209                                                                | 1.179283197 | 1.274205209 | 0.90364392  |             |
| YGR195W     | YGR195W::SKI6::superkiller; ExtraCellular Mutant; Ribosomal RNA Processing |             |             |             | 1           |
| 0.825386305 | 1.188009162                                                                | 1.244518139 | 1           | 0.778576605 | 0.812892643 |
| 0.916794055 | 1.154705653                                                                | 1           |             | 0.713485068 | 1.115501306 |
|             | 1.04299025                                                                 | 1.733859564 | 1           | 1.162229476 | 1.127307224 |
| 1.014054346 | 0.977274476                                                                | 1           | 1.069959081 | 1.298707965 | 1.02657963  |

1.087147806 1.426130129 1 0.988073349 1.124052423 1.133368147  
1.274094609 1.020392872 1.01484825  
YDR478W YDR478W::SNM1::Has roles in both mitochondrial DNA replication and  
nuclear 5.8S rRNA processing. 1 1.151644676 1.432871458 1.118925021  
1.405472681 1 1.083952663 1.15483736 1.552190627 1.57879227 1  
1.161430357 1.268733416 2.050313284 1.317984072 1 0.710936029  
0.570956465 0.598408856 1.187129177 1 1.331214193 2.87992936  
1.452761527 0.77081472 1 0.87997005 0.985387382 0.586768632  
0.626808091 0.847479242 1 0.797349293 1.1161179 0.852496191  
1.348877073 1.343807685 1 0.801382995 0.872988696 0.942656463  
1.20574485 0.894776418 1.230251695  
YGR197C YGR197C::SNG1::Involved in nitrosoguanidine resistance 1  
1.072597316 0.92139865 0.804045489 0.549144001 1 0.999679195  
0.95106308 0.804593251 0.685277391 1 1.41683515 1.337273647  
1.296699141 0.748459194 1 0.979510533 1.577437527 0.95060933 1  
1.508697173 1.428481704 1.338684345 1.082884842 1 1.318964803  
1.466293744 1.567229583 1.35585638 0.905441615 1 1.205340616  
1.077540454 1.234635963 0.955269098 0.815125697 1 1.146850559  
1.041830623 0.934118967 0.666239726 0.648722938 0.818708442  
YDR480W "YDR480W::DIG2::Down-regulator of Invasive Growth, Regulator of  
Sterile Twelve" 1 0.883240203 1.096254815 0.872378027 1.072537528 1  
0.854766449 0.828656978 1.163480809 1.096942606 1 1.077318614  
1.016004651 1.027336167 1.225926434 1 1.408651145 1.11157426  
1.032588094 1.597655765 1 1.38006346 2.218510264 1.716900001  
1.103872682 1 0.948950252 1.020097976 0.917939742 0.785531968  
1.09544957 1 1.928453379 1.960631866 1.574524451 2.019420731  
2.09356261 1 1.180850987 1.184838134 1.290679889 1.165133963  
1.061256299  
YGR199W YGR199W::PMT6::Transfers mannose residues from dolichyl phosphate-D-  
mannose to specific serine/threonine residues of proteins in the secretory  
pathway 1 1.165338028 0.785490842 1.132930024 0.723248489 1  
1.04354686 1.071643549 0.947076871 0.764105368 1 1.157411883  
1.058457496 0.573107957 0.936768936 1 0.901774816 0.885222702  
0.721503327 0.448718353 1 0.731811587 0.413046772 0.600131694  
0.55239943 1 0.967795918 1.052909458 1.298927945 1.160018005  
0.976129744 1 0.853585902 0.691014101 0.851642853 0.779150633  
0.544941811 1 1.01271781 0.937097949 1.064551693 0.71549724 1.014717  
1.142689274  
YDR482C YDR482C::CWC21::Complexed With Cef1p 1 1.046704627  
0.981960667 1.011775619 0.898748827 1 1.016945688 1.077458908  
0.939522815 0.820756689 1 1.03957191 1.031130695 1.07518047  
0.875925648 1 0.972604368 0.709833777 1.071496967 0.989787371 1  
0.967154295 1.132780749 0.899788604 1.036897669 1 0.950221408  
0.903473769 1.051961275 0.895688508 0.940138164 1 0.883889397  
0.879503534 0.631565222 0.882700779 0.984005763 1 0.885271337  
0.824121999 1.168014295 1.341574856 0.879668772 1.126928036  
YGR213c YGR213c::RTA1::involved in 7-amincholesterol resistance 1  
0.889854991 0.848208537 1.199769406 1.026507422 1 1.062395663  
1.132545008 1.4201601 1.304960414 1 0.787129106 1.149700499  
1.508179842 1.396807689 1 1.053701304 1.246107862 1.34530148 1  
0.912139036 1.745613675 1.360723294 1.415319571 1 1.026486468  
1.250912239 1.218678262 0.971537281 1.02395247 1 1.001250999  
1.369489754 1.763315791 1.487711031 1 1.545951685  
1.451184269 0.663122687 1.483216194 1.071763756  
YDR484W YDR484W::SAC2::May interact with actin as a component or controller  
of the assembly or stability of the actin cytoskeleton 1 0.998209582  
1.220232372 1.141030955 1.216566605 1 1.120193765 1.137052698

|             |                                                                          |             |             |             |             |             |   |
|-------------|--------------------------------------------------------------------------|-------------|-------------|-------------|-------------|-------------|---|
| 1.068157645 | 1.041010332                                                              | 1           | 0.989714045 | 0.924836777 | 1.005686065 | 1           |   |
| 0.888476565 | 0.501045941                                                              | 0.506561225 | 0.92758013  |             | 0.525562929 |             |   |
| 0.4155589   | 0.475077565                                                              | 1           | 1.054849948 | 0.9792647   | 1.116451731 |             |   |
| 1.150541355 | 1                                                                        | 1.23313868  | 1.658660258 | 1.159924046 | 1.625212714 |             |   |
| 1.162802443 | 1                                                                        | 1.178284644 | 1.062492627 | 1.367174613 | 1.286637484 |             |   |
| 1.415603279 | 0.958808305                                                              |             |             |             |             |             |   |
| YDR498C     | "YDR498C::SEC20::membrane glycoprotein, sorted by HDEL retrieval system" | 1           | 0.864613692 | 0.899533344 | 0.793690853 | 0.879260175 | 1 |
| 0.816022315 | 0.873455715                                                              | 1.035467233 | 0.841707686 | 1           | 0.751919352 |             |   |
| 0.796763812 | 0.843735689                                                              | 0.848675072 | 1           | 0.879771354 | 0.413440426 |             |   |
| 1.040128037 | 1.173393942                                                              | 1           | 1.037845243 | 1.572133472 | 1.168610802 |             |   |
| 1.105808121 | 1                                                                        | 1.179937977 | 1.130617549 | 1.545746186 | 1.173278741 |             |   |
| 1.351543841 | 1                                                                        | 0.963848179 |             | 0.860160681 | 0.786407317 | 1.002863972 | 1 |
| 1.070901435 | 0.850718815                                                              | 1.085974843 | 1.142723911 | 0.936966977 | 0.759165994 |             |   |
| YDR500C     | YDR500C::RPL37B::Homology to rat L37                                     | 1           | 0.8070097   |             |             |             |   |
| 1.252572765 | 0.651670341                                                              | 1.553180625 | 1           | 0.849367465 | 0.922508092 |             |   |
| 1.289626644 | 1.152475688                                                              | 1           | 0.715670579 | 0.754478561 | 0.917246892 |             |   |
| 0.8279957   | 1                                                                        | 0.610382317 | 0.232939435 | 0.241269962 | 0.626999887 | 1           |   |
| 1.319393585 | 1.173770443                                                              | 0.686542714 | 0.830544833 | 1           | 0.92240223  |             |   |
| 0.898271735 | 0.88224155                                                               | 1.008242708 | 1.229773906 | 1           | 1.102397828 |             |   |
| 1.958486539 | 1.002826586                                                              | 0.904763561 | 2.031152265 | 1           | 0.928409979 |             |   |
| 1.204122599 | 0.956240936                                                              | 2.014846559 | 0.969150538 | 1.232878585 |             |             |   |
| YDR502C     | YDR502C::SAM2::methionine biosynthesis regulation                        | 1           |             |             |             |             |   |
| 1.24728522  | 1.028079163                                                              | 0.841046836 | 0.651721545 | 1           | 1.131378014 |             |   |
| 1.108696573 | 0.586136633                                                              | 0.580249689 | 1           | 0.879924424 | 0.931240482 |             |   |
| 0.660070697 | 0.334331515                                                              | 1           | 1.33606012  | 1.018479677 | 1.075228031 | 1           |   |
| 1.288191921 | 0.547689689                                                              | 0.625149483 | 1.116213022 | 1           | 0.771104535 |             |   |
| 0.425916623 | 0.845065077                                                              | 1.814661607 | 0.997844759 | 1           | 0.711528706 |             |   |
| 0.432834686 | 0.187575812                                                              | 0.923590001 | 1.166176229 | 1           | 0.76317725  |             |   |
| 0.382758033 | 0.975345928                                                              | 1.017174486 | 0.747492949 | 1.015723811 |             |             |   |
| YDR504C     | YDR504C::YDR504C::molecular_function unknown                             | 1           | 2.078548721 |             |             |             |   |
| 1.738944118 | 1.398506026                                                              | 1.959091669 | 1           | 1.547746427 | 1.284448253 |             |   |
| 1.880872173 | 1.698009446                                                              | 1           | 1.389513966 | 1.423564946 | 2.489149239 |             |   |
| 1.286055763 | 1                                                                        | 1.967203133 | 2.600332783 | 2.291666303 | 2.929369643 | 1           |   |
| 1.197480009 | 2.974968711                                                              | 1.786939465 | 1.167521222 | 1           | 0.87158405  |             |   |
| 1.005231799 | 1.021166494                                                              | 0.829937594 | 0.768862497 | 1           | 0.997697874 |             |   |
| 1.196130204 | 0.934886137                                                              | 0.801851746 | 1.203931755 | 1           | 1.282686674 |             |   |
| 1.584848737 | 1.133391196                                                              | 1.855352338 | 1.95420247  | 1.392242189 |             |             |   |
| YDR506C     | YDR506C::YDR506C::molecular_function unknown                             | 1           | 0.861592637 |             |             |             |   |
| 0.9755527   | 1.129279499                                                              | 0.672816056 | 1           | 0.95081385  | 1.075050289 |             |   |
| 1.149198821 | 0.801844326                                                              | 1           | 1.170349717 | 1.266247288 | 0.518747001 |             |   |
| 1.204286756 | 1                                                                        | 1.084783662 | 0.661909392 | 1.13776565  | 1.239743618 | 1           |   |
| 1.314731971 | 1.584831777                                                              | 1.816064962 | 0.785928743 | 1           | 0.956112659 |             |   |
| 1.142925176 | 1.033319174                                                              |             | 0.926766039 | 1           | 0.951985421 | 1.048211419 |   |
| 1.259302543 | 1.725400069                                                              | 0.472947921 | 1           | 0.946572836 | 0.839853066 |             |   |
| 1.169625896 | 0.658792148                                                              | 0.766925629 | 1.14969428  |             |             |             |   |
| YDR508C     | YDR508C::GNP1::high-affinity glutamine permease                          | 1           | 0.906367314 |             |             |             |   |
| 0.762090524 | 0.88039589                                                               | 0.554064677 | 1           | 1.01276532  | 0.978998696 |             |   |
| 0.643306696 | 0.605102455                                                              | 1           | 0.800793998 | 0.685981264 | 0.553221808 |             |   |
| 0.65931556  | 1                                                                        | 0.865396566 | 0.767644465 | 0.894771165 | 0.641985448 | 1           |   |
| 0.515880574 | 0.494187457                                                              | 0.436811429 | 0.515415032 | 1           | 0.651518748 |             |   |
| 0.653222109 | 0.760605982                                                              | 1.087761535 | 0.838361873 | 1           | 0.616149974 |             |   |
| 0.491419628 | 0.505301221                                                              |             | 0.439184883 | 1           | 0.545909844 | 0.414304365 |   |
| 0.99926309  | 0.5916934                                                                | 0.508755061 | 0.729394796 |             |             |             |   |
| YDR522C     | YDR522C::SPS2::Middle/late gene of meiosis                               |             |             |             |             |             |   |
| 0.962723708 |                                                                          |             | 0.900673232 |             | 0.96209431  |             |   |
| 0.978989    | 1                                                                        | 0.962798387 | 0.804226592 | 1.529912362 | 1.408803687 | 1           |   |

0.94369617 2.731355672 2.347932776 0.834562981 1 0.852889482  
 0.846099058 0.800856633 0.923345599 0.811823237 1 0.960197712  
 0.85848404 1.139932047 1 0.737942377 0.96785333 0.959223196  
 1.034198629 0.957234109 1.253017939  
 YDR524C YDR524C::AGE1::ADP-ribosylation factor (ARF) GTPase activating  
 protein (GAP) effector 1 0.733306765 0.780951283 0.882253576 0.780526731 1  
 0.837766386 0.797840595 0.784545374 0.745593552 1 0.673202779  
 0.642315451 0.604231637 0.7165085 1 0.669092868 0.517613939  
 0.872608996 0.879910788 1 0.614483104 1.103029424 0.941821808  
 0.585185527 1 0.8138433 0.761579711 0.729884723 0.95744696  
 0.86307234 1 0.73667193 0.614281849 0.529563567 0.762669433  
 0.543387005 1 0.82044936 0.621548672 0.879631678 0.764661031  
 0.799531182 0.801195979  
 YDR526C YDR526C::YDR526C::molecular\_function unknown 1 1.751742714  
 1.655943572 2.665924275 1.728957996 1 1.907810005 1.80190837  
 2.093043295 1.847851265 1 1.485755784 1.79746474 1.598302746  
 1.947999301 1.011688304  
 0.845674397 0.98298823 0.992824367 1  
 1.379493719 1 1.031608284 1.185513347  
 0.974801599 1.021853256  
 YDR528W YDR528W::HLR1::LRE1 homolog 1 0.820172829 1.06463289  
 1.161214343 1.18768875 1 1.065620408 1.042644647 1.246298339  
 1.199936243 1 0.560075706 0.620293607 0.821014699 1.070257223 1  
 0.549498069 1.906900852 1 0.332948051 0.471937549  
 0.735103362 0.962978667 1 0.749343936 0.803636301 0.82511406  
 0.714585003 1.047125695 1 0.794744722 1.028781469 0.779228628  
 1.088917482 0.842608705 1 0.971850194 1.033419673 1.104521826  
 1.232662304 1.137100559 0.57440936  
 YDR530C "YDR530C::APA2::5',5'''-P-1,P-4-tetraphosphate phosphorylase II" 1  
 1.343800937 1.390601828 1.430376481 1.526740387 1 1.417035811  
 1.292096544 1.505575696 1 1.269065441 1.613279768 1.421700005  
 1.446491991 1 1.408443632  
 1 1.004021256 0.995077957 1.352370275 1.343121789 1  
 1.058859561 1.398925349 1.281947233 1 0.905042517 0.538848816  
 1.071242368 1.1142266  
 YDR532C YDR532C::KRE28::Killer toxin REsistant 1 0.872470749  
 0.855151363 0.988623161 0.886286372 1 0.893016248 1.016778749  
 0.940937306 0.842991681 1 0.822161583 0.883791543 0.806960551  
 0.938485236 1 0.907128808 0.775193084 0.917876743 1.06132064  
 0.523875136 0.788344376 0.52580921 0.488123167 1 0.968708198  
 1.084616444 1.003400317 1.030792823 1.15851571 1 0.835213284  
 0.584068592 0.626451191 0.591665068 1 1.191914891 0.835757469  
 1.018833204 1.049582595 1.34716466 0.782807851  
 YEL001c YEL001c::YEL001C::molecular\_function unknown 1 1.512287181  
 1.314792363 1.12765291 1.500310624 1 1.189629099 1.112217648  
 1.242797143 1 1.048061323 1.097022538 1.170527984 1.132937985 1  
 1.170219387 0.866414479 1.101928016 1 0.878151974 0.645941179  
 1 1.529131806 1.34065804 1.477004092 1.337655714 1.299847488 1  
 1.396336325 1.610354319 1.591285365 0.993473376 0.845680284 1  
 1.009482051 1.197017206 1.347741466 0.770238514 1.214490457  
 YEL003w "YEL003w::GIM4::Prefoldin subunit 2; putative homolog of subunit 2  
 of bovine prefoldin, a chaperone comprised of six subunits" 0.882832788  
 1.040879623 0.764811881 1.375451417 0.756705 0.674406573  
 1.105033309 1.087864854 0.740258075 0.859923946 1.353199419  
 0.924165622 1 1.095455151 0.532722989 0.807654164 1.269231843 1  
 1.31914285 2.10439884 1.845006059 0.759120855 1 0.729211916  
 0.875650332 0.555578414 0.507255991 0.913188529 1 1.287309025

1.915107124 1.651739025 1.555011582 2.284868465 1 1.645804496  
2.034870014 1.15857357 2.478105323 1.868982117 1.809039171  
YEL005c YEL005c::VAB2::Vac8p binding protein of 31 kDa 1 0.918915015  
1.174344765 0.93316557 1.555278448 1 1.053716153 0.953485371  
1.101341162 1.161400413 1 0.895727748 1.139163641 1.527491121  
1.277498065 1 1.643377278 1.643419499 2.17495513 2.428383231  
0.36554845 0.655276362 0.768117632 1 0.944000921 1.294420712  
0.863080539 0.748443491 1.075801388 1 1.055021797 1.474719081  
1.395324633 1.17204227 1.471863274 1 1.323622146 1.356675878  
0.90362688 1.490405643 1.160450267 1.140938049  
YEL007w YEL007w::TOS9::molecular\_function unknown 1 0.822596098  
0.837062009 0.776952445 0.654027923 1 0.893330776 0.978406904  
0.579855692 0.515171014 1 1.066295308 1.134496425 0.919044351  
0.767187648 1 1.354173571 1.143322141 1.924957611 1.459261441 1  
0.724811812 1.029505624 1.124927994 0.955052753 1 1.091157856  
0.994293349 1.371605972 1.068302543 1 1.406568961 1.614359706  
1.589986412 1.297037621 1.398960769 1 1.079133068 1.21513178  
0.713994863 1.114514665 0.637654191  
YEL007w YEL007w::TOS9::molecular\_function unknown  
1 1.13606787 1.031641266  
1.182919069 1.085786062 1.09314552 1 0.781564617 0.660147459  
1.088309921 0.658234901 0.569996595 1 0.809947828 0.804998011  
0.930267088 0.995101582 0.800102743 0.797693476  
YEL009c YEL009c::GCN4::transcriptional activator of amino acid biosynthetic  
genes 1 1.259678195 0.903751295 0.844582615 1.156411026 1 0.979760897  
0.920352662 0.825757109 1.115742609 1 0.974589115 0.676660987  
0.707135529 1 0.974735441 0.760015187 0.981340439 1.369740472 1  
0.596651904 0.841016853 0.740827707 0.850479089 1 1.451054221  
0.892851398 1.431114029 1.307616431 1.121086442 1 0.835415412  
0.877682786 1.114233163 0.581140398 0.975082431 1 0.991275711  
1.115822679 1.079012996 1.471529748 1.100623432 1.485058286  
YEL011w YEL011w::GLC3::Glycogen branching enzyme 1 1.206726649  
1.493357725 1.186842216 0.837126803 1 1.651494203 1.863367916  
0.712963997 1 1.632105195 1.933809391 2.534299011 0.855098771 1  
4.764974272 3.101314334 4.267266569 1.960290521 1 2.721871324  
1.484518641 1.990608648 1.028852117 1 1.404877653 1.675154457  
1.557295551 0.972362719 1.120521016 1 1.113064316 0.7988485  
2.568696964 1.083271418 0.916811075 1 1.582567275 0.959486508  
1.283295763 1.026247889 2.51459531 0.792439695  
YEL024w "YEL024w::RIP1::oxidizes ubiquinol at center P in the protonmotive Q  
cycle mechanism, transferring one electron to cytochrome c1 and generating a  
low-potential ubisemiquinone anion which reduces the low-potential cytochrome b-  
566 heme group" 1 1.214188537 1.170768509 0.976515799 1.005522314 1  
1.471517271 1.190623079 0.816304086 1.113265183 1 0.859641499  
0.887264615 1.120752765 0.618655201 1 1.303561893 0.806737153  
1.370055925 1.447256742 1 1.105167605 0.528270494 1.206202063  
1.256782918 1 0.504769009 0.259107924 0.379013582 0.890203292  
0.903889463 1 0.293626936 0.09262303 0.147187233 0.241831436  
0.514205988 1 0.458585204 0.189918389 0.585979126 1.296199811  
1.655323465 0.875624  
YEL026w "YEL026w::SNU13::part of small (ribosomal) subunit (SSU)  
processosome (contains U3 snoRNA); RNA binding protein (putative), similar to  
Nhp2p" 1 1.624781889 1.533094981 0.702374686 1.943717772 1  
1.097798277 0.995931264 1.238965287 1 1.038318083 0.583417965  
0.72107751 0.945259355 1 0.437183217 0.131228591 0.138980328  
0.563918346 1 0.749872509 0.60747599 0.257158894 0.53918372 1

|                                                       |                                                                      |             |             |             |             |
|-------------------------------------------------------|----------------------------------------------------------------------|-------------|-------------|-------------|-------------|
| 1.041451417                                           | 0.62713642                                                           | 0.415596816 | 0.691235115 | 0.722157851 | 1           |
| 0.813092041                                           | 1.024888729                                                          | 0.538599773 | 0.501893309 | 1.689465796 | 1           |
| 0.815067943                                           | 0.762814241                                                          | 0.645877218 | 2.138278067 | 0.555991953 | 1.267903512 |
| YEL028w                                               | YEL028w::YEL028W::molecular_function unknown                         |             | 1           |             | 1.955347511 |
| 1.874389549                                           | 1.893903218                                                          | 1.86324044  | 1           | 1.973423142 | 1.801261754 |
| 1.853929744                                           | 1                                                                    | 1.734209775 | 1.624844437 | 1.734513886 | 1.644528849 |
| 1.034956181                                           |                                                                      |             | 0.480800957 |             | 1           |
| 1.169607986                                           | 0.933801202                                                          | 0.873409145 | 1.089313368 | 1.057359153 | 1           |
| 0.813569584                                           | 0.68911956                                                           | 0.918173975 | 0.677164779 | 0.653870072 | 1           |
| 0.928372703                                           | 0.805417011                                                          | 0.818883546 | 0.952123271 | 0.840620631 | 0.934290836 |
| YEL030w                                               | YEL030w::ECM10::ExtraCellular Mutant                                 |             | 1           |             | 0.807204609 |
| 1.125251954                                           | 0.659583726                                                          | 1           | 1.102480709 | 1.221815091 | 0.651406279 |
| 0.888826829                                           | 1                                                                    | 1.071038568 | 0.945062518 | 0.728375853 | 0.686382879 |
| 1.349582756                                           | 2.143218029                                                          | 1.673578232 | 0.994800452 | 1           | 0.987405952 |
| 0.567776522                                           | 0.955955719                                                          | 1           | 1.170741267 | 0.940502301 | 1.213866246 |
| 1.069420576                                           | 1.241309359                                                          | 1           | 1.267131602 | 0.676966856 | 0.8463802   |
| 0.606924285                                           | 0.438571623                                                          | 1           | 1.368049047 | 0.816573348 | 0.927382531 |
| 0.929860021                                           | 1.007147797                                                          | 0.682111082 |             |             |             |
| YLR091W                                               | YLR091W::YLR091W::molecular_function unknown                         |             | 1           |             | 0.967300836 |
| 0.902600694                                           | 0.892066202                                                          | 0.816026543 | 1           | 0.97754113  | 1.067838918 |
| 0.93924166                                            | 1.010111926                                                          | 1           | 0.95029984  | 0.737797101 | 0.733606594 |
| 0.962862752                                           | 1.084284104                                                          | 0.61020895  | 0.800474083 |             |             |
| 0.458681791                                           | 0.552400172                                                          | 0.562155472 | 0.414198067 | 1           | 1.156478133 |
| 0.988706003                                           | 1.089272811                                                          | 1.036339737 | 1           | 0.820506231 | 0.545136834 |
| 0.700619674                                           | 0.760546988                                                          | 0.433683423 | 1.243085923 | 1.084233466 |             |
| 1.125063585                                           | 1.174615417                                                          | 1.011728957 | 0.732897299 |             |             |
| YLR105c                                               | YLR105c::SEN2::tRNA splicing endonuclease subunit                    |             | 1           |             |             |
| 0.802445767                                           | 0.934175651                                                          | 0.830936043 | 1.028857884 | 1           | 0.866225535 |
| 0.759129715                                           | 1.073534758                                                          | 1           | 0.755389125 | 0.737234864 | 0.745887385 |
| 0.974684178                                           | 1                                                                    | 0.948992523 | 0.862503914 | 0.792514393 | 1.353444944 |
| 1.082784297                                           | 1.664077369                                                          | 1.687710163 | 1.424783121 | 1           | 1.016138832 |
| 0.972208872                                           | 0.806122023                                                          | 0.91424451  | 1.098358589 | 1           | 0.875792189 |
| 0.970729327                                           | 1.074212168                                                          | 0.981519478 | 1.143681466 | 1           | 0.93132008  |
| 1.113614957                                           | 1.07679347                                                           | 1.305720886 | 1.083363219 | 1.150569945 |             |
| YLR107W                                               | YLR107W::REX3::RNA EXonuclease; member of 3'->5' exonuclease family. |             |             |             |             |
| See Moser et al. 1997 Nucleic acids Res. 25:5110-5118 | 1                                                                    |             |             |             | 0.999916509 |
| 1.042468725                                           | 0.942260922                                                          | 1.341874459 | 1           | 0.945003687 | 0.786922564 |
| 1.302864355                                           | 1.313157934                                                          | 1           | 0.712688888 | 0.737553898 | 0.922155062 |
| 1.100303329                                           | 1                                                                    | 0.755535895 | 0.551006642 | 0.834422922 | 1.236462005 |
| 1.307818772                                           | 2.049160869                                                          | 1.759608724 | 1.075574409 | 1           | 1.173480346 |
| 1.074894322                                           | 1.070561085                                                          | 1.171126777 | 1.20966169  | 1           | 0.882520748 |
| 1.01473297                                            | 1.015116125                                                          | 0.921236059 | 0.927602025 | 1           | 1.213335254 |
| 1.521625861                                           | 1.149155053                                                          | 1.764951729 | 1.452134251 | 1.384361518 |             |
| YLR109W                                               | YLR109W::AHP1::thioredoxin peroxidase                                |             | 1           |             | 0.95675643  |
| 1.489967461                                           | 0.620070684                                                          | 0.993672436 | 1           |             | 1.028600315 |
| 1.608076845                                           | 2.316969102                                                          | 3.346221047 | 0.532064485 | 1           | 1.181810083 |
| 1.897743398                                           | 2.691861405                                                          | 2.140877663 | 1           | 2.474645978 | 6.586632696 |
| 6.438375226                                           | 2.575479627                                                          | 1           | 1.84923281  | 3.000520197 | 2.560727584 |
| 1.007651598                                           | 0.653913179                                                          | 1           | 1.997216464 | 4.350989321 | 3.025247533 |
| 1.810317276                                           | 1.268930277                                                          | 1           | 1.514751974 | 2.658774541 | 2.285595425 |
| 0.71204924                                            | 1.157671213                                                          | 2.119885707 |             |             |             |
| YLR111W                                               | YLR111W::YLR111W::molecular_function unknown                         |             |             |             | 1.04043755  |
| 1.054349634                                           | 1.171984698                                                          |             |             | 1.065562378 |             |
| 1.040793557                                           | 0.989775405                                                          | 0.94668237  | 1           |             | 1           |
|                                                       | 1                                                                    | 1.026486468 | 0.878670137 | 0.890499455 | 0.921224321 |
| 0.971726443                                           | 1                                                                    | 0.678638818 | 0.855918925 | 0.643505662 | 0.87482762  |

0.814133698 1 1.089624005 0.948340591 1.319710454 0.966453994  
0.72238979

YLR113w YLR113w::HOG1::Osmoregulation. Hog1p is activated under stress  
conditions when the cAMP cellular content is low. 1 0.793015605  
0.793969006 0.818093064 0.484304113 1 0.989279118 0.92902773  
0.658332641 0.737504947 1 0.763507584 0.754893813 0.772756857  
0.656530164 1 1.123898879 0.995433226 1.299225056 0.983243211 1  
0.776878819 0.743761899 1.15821999 0.934284766 1 1.014967289  
0.848482335 1.228244137 0.998180347 1.300619803 1 0.852498803  
0.533763499 0.857788968 0.703515611 0.318928944 0.98060616  
0.670512808 1.0531179 0.940308922 0.822323872 0.671603625

YLR115W "YLR115W::CFT2::cleaves pre-mRNAs prior to polyadenylation;  
homologous to both the 73- and 100-kDa subunits of mammalian cleavage and  
polyadenylation specificity factor (CPSF), as well as to YSH1/BRR5" 1  
0.677282957 0.711618857 1.076334825 0.754029203 1 0.892854037  
1.109744949 0.757141808 0.648875403 1 0.853875796 0.84784322  
0.484584801 0.948659302 1 0.900332571 0.839341003 0.880332235  
0.542501811 0.70335976 0.483405245 0.504430161 1 1.200029187  
1.122643611 1.02203692 0.956744029 1.152681225 1 1.391527361  
0.80042962 1.103109203 0.905888384 0.448804728 1 0.932018657  
0.764481612 0.748992181 0.857708258 1.026231372

YLR129w YLR129w::DIP2::part of small (ribosomal) subunit (SSU) processosome  
(contains U3 snoRNA); DOM34 Interacting Protein 1 0.630612305 0.544899089  
0.788877104 0.633838124 1 0.760691215 0.656301425 0.724760907  
0.727388011 1 0.405347851 0.356845432 0.206960585 0.879432856 1  
0.181347306 0.152793898 0.223239582 1 0.291233408 0.24732276  
0.333003237 0.673486514 1 0.900629266 0.73937386 1.130532697  
1.008398186 1.228519286 1 0.774571891 0.483843351 0.628511461  
0.925082753 0.494671604 1 0.529872458 0.537405957 0.861145776  
0.384493417 0.962310756

YLR131c YLR131c::ACE2::involved in transcriptional regulation of CUP1 1  
0.804085119 0.953259973 0.96370954 1 1.110860613 1.184519284  
0.642999369 1 0.919413007 0.970470787 0.791130122 0.749089163 1  
1.074609981 0.875639202 0.688888788 1 0.758814319 1.01180545  
1 1.053062158 0.911782726 0.894015179 0.969883672 0.91541766 1  
0.798348543 0.678600568 0.595491963 0.769888721 0.967027254 1  
0.66430325 0.887967965 0.921228845 1.088400659

YLR133w YLR133w::CKI1::choline kinase 1 0.759242107 0.894146551  
1.019685643 0.878116059 1 1.084092328 1.027611766 0.718931951  
0.771820202 1 0.937111242 1.097019894 0.493261569 0.798724133 1  
1.446999691 0.973120243 1.117107817 0.796798261 1 0.982431574  
0.700197127 0.701953844 0.771366472 1 1.1238739 1.512135814  
1.117814029 1.012793721 0.839054712 1 1.172502303 1.076792935  
1.237987499 1.173829436 0.635048513 1 1.401505862 0.865973099  
1.039457829 0.739102116 0.732021686

YEL032w YEL032w::MCM3::Member of complex that acts at ARS's to initiate  
replication 1 1.201253559 1.01588466 1.400106305 0.877899475 1  
1.269536354 1.318482699 0.812187807 1 1.027245349 1.126520021  
0.599598572 0.988521125 1 0.628039534 0.777647107 1  
0.567775445 1 1.193030353 1.146833299 1.440341561  
1.761783124 1.207045869 1 0.917668669 0.859632152 0.929146163  
0.789068422 0.558159661 1 0.892747222 1.160849823 0.786100037  
1.082947005 0.790211359 0.772300393

YEL034w YEL034w::HYP2::Translation initiation factor eIF-5A 1  
1.762388736 1.541886549 1.115503749 1.763272366 1 1.335793811  
1.186202375 1.297430617 1.502498581 1 1.088726057 0.977245801  
1.510377502 0.912927087 1 0.872851061 0.781014674 1.030507966



1.445484233 1 0.51542492 0.518790011 0.633858357 0.599276348 1  
0.748521109 0.531609669 0.572417031 1.024418196 0.801267441 1  
0.706517813 0.447640516 0.325580038 0.355972487 0.572736255 1  
1.038525835 0.459614805 0.454342617 1.625631493 0.835275966 1.125176811  
YEL048c YEL048c::YEL048C::molecular\_function unknown 1 1.17240453  
0.790115699 1.119922076 1.492452225 1 0.994548395 0.961056235  
0.95200934 1.322621587 1 0.606876156 0.558551619 0.542508127  
1.075272898 1 0.394363485 0.476164207 1 0.519823325  
0.481667411 1 0.946515975 0.978003924 1.016497701 1.21884006  
1.091813287 1 0.572090559 0.780959226 0.592678305 0.693760514  
0.738101553 1 0.832646821 0.923327625 1.384306323 0.739413368  
0.73902664  
YEL050c YEL050c::RML2::mitochondrial ribosomal protein L2 of the large  
subunit 1 0.920490157 1.066567157 1.167948933 1.018506937 1  
1.112543994 1.180377939 1.253300022 1.298072361 1 0.993945625  
0.990611506 1.049534452 0.990065893 1.247483712  
1.384926051 1 1.18032051 0.969287546 1 0.986845683  
0.98684337 0.945659192 0.969533695 0.899125059 1 0.889307221  
0.831485648 0.779597036 0.674611551 0.821677757 1 1.121584531  
0.730966547 1.289076631 1.275015393 0.827464674  
YEL052w YEL052w::AFG1::ATPase family gene 1 1.029525535 0.931948973  
1.015486711 0.823777722 1 0.980026834 1.084492037 0.901614164  
0.87508636 1 1.314786377 1.007648176 0.877295011 0.80289491 1  
1.937815268 1.225567711 1.795598176 1.409304768 1 1.424683769  
1.298130241 1.239668719 0.752052522 1 1.038231154 1.043795665  
1.035565748 1.028698097 1.086140955 1 1.143490824 0.962121704  
1.079929077 0.775934449 0.623942115 1 1.018201922 0.73926113  
0.716187654 0.812534566 0.844299984 1.003465128  
YEL054c YEL054c::RPL12A::Homology to rat L12(a) and E. coli L11 1  
1.492199455 1.33700673 0.869423737 1.872310689 1 1.078969529  
1.034746777 1.245080544 1.390133051 1 0.92175374 0.826192109  
0.753732717 0.955871163 1 0.864333181 0.359987151 0.248954615  
1.014630055 1 1.226289915 0.673410612 0.554103428 0.809926639 1  
1.288229089 1.185772363 0.932898136 1.193991191 1.312907124 1  
1.233451383 1.435002924 0.874718555 0.567282201 1.128142386 1  
1.304458508 1.433403037 2.039721961 0.932634286 1.457038366  
YEL056w "YEL056w::HAT2::subunit of histone acetyltransferase; may regulate  
activity of Hat1p, the catalytic subunit of histone acetyltransferase" 1  
0.962781731 1.002052677 1.104889914 1.151883526 1 1.008840658  
0.994144885 1.027795491 1 0.973095372 0.931678363 0.741458233  
0.876033963 1 1.452742004 1.022721832 0.912348452 0.806153849 1  
1.026666443 0.65371179 0.622454351 0.619271349 1 0.973023681  
0.982195312 0.958345079 0.970014314 1 1.132376781 0.965342341  
1.070336001 0.938782177 0.856831431 1 0.829749979 0.784018981  
0.877363927 0.702379505 0.93253961  
YEL058w YEL058w::PCM1::Phosphoacetylglucosamine Mutase 1 1.079244486  
0.94565732 1.091661797 0.800939276 1 1.085161584 1.195424395  
1.166517574 1 1.11918672 1.045609764 0.833937162 1.004650927 1  
1.439115625 0.876051953 1.068787017 1.11193752 1 1.072949782  
0.713746728 0.729361979 0.769584898 1 1.265493473 1.127553181  
1.701249948 1.254670288 0.98921606 1 1.125492433 1.006561724  
1.547387351 0.98932582 0.676864641 1 1.166706116 1.083870752  
2.056855589 0.939684234 0.78378235 0.596299939  
YEL072w YEL072w::RMD6::Required for Meiotic nuclear Division  
1.019505647 1.094404127 0.853145411 0.928062626 0.957685858  
0.839163846 0.988742721 1.07060123 1.233298031 0.990943956  
0.929060562 1 0.721535382 0.838577959 0.664447407 1.386960094

|             |                                                                                                                                                                         |             |             |             |             |             |   |
|-------------|-------------------------------------------------------------------------------------------------------------------------------------------------------------------------|-------------|-------------|-------------|-------------|-------------|---|
| 0.37136928  | 0.608311169                                                                                                                                                             | 0.626367238 | 0.388106831 | 1           | 0.924277438 |             |   |
| 0.528302559 | 0.773079507                                                                                                                                                             | 1.085476676 | 1           | 0.775607291 | 0.698780564 |             |   |
| 1.109779574 | 1.653616585                                                                                                                                                             | 1           | 1.089231674 | 0.562218159 | 1.370948274 |             |   |
| 0.667687431 | 1.446547475                                                                                                                                                             | 1.531466335 |             |             |             |             |   |
| YEL074w     | YEL074w::YEL074W::molecular_function                                                                                                                                    | unknown     | 1           | 1.267610822 |             |             |   |
| 1.010577654 | 1.021659132                                                                                                                                                             | 0.875942651 | 1           | 1.215857716 | 1.217501664 |             |   |
| 0.935878869 | 0.782563312                                                                                                                                                             | 1           | 1.275465225 | 0.964217858 | 1.11816248  |             |   |
| 0.720348713 | 0.517478091                                                                                                                                                             | 0.399834485 | 0.434666039 | 0.358953049 | 1           |             |   |
| 0.82965258  | 1.2536117                                                                                                                                                               | 0.845525231 | 1           | 1.010680101 | 1.082038193 |             |   |
| 1.168823811 | 1.037927476                                                                                                                                                             | 0.976796544 | 1           | 0.685818796 | 0.607452689 |             |   |
| 0.770682912 | 0.783843168                                                                                                                                                             | 0.712151798 | 1           | 0.631373627 | 0.674235126 |             |   |
| 0.895163055 | 0.814175487                                                                                                                                                             | 0.767181562 | 1.189972988 |             |             |             |   |
| YLR135W     | YLR135W::SLX4                                                                                                                                                           | 1           | 1.034512012 | 1.118445827 | 1.096874112 |             |   |
| 1.43051358  | 1                                                                                                                                                                       | 0.988370977 | 1.194712579 | 1.226708607 | 1           |             |   |
| 0.90344816  | 1.077225072                                                                                                                                                             | 0.971200375 | 1.353847159 | 1           | 1.145744647 |             |   |
| 0.672046768 | 0.846775036                                                                                                                                                             | 0.931084226 | 1           | 0.995994975 | 1.224624881 |             |   |
| 1.155624528 | 0.759768301                                                                                                                                                             | 1           | 0.907350224 | 0.882741259 | 0.798543037 |             |   |
| 0.96409644  | 1                                                                                                                                                                       | 0.925369684 | 0.972521876 | 0.863911381 | 1.053452133 |             |   |
| 1.132258137 | 1                                                                                                                                                                       | 1.094453541 | 1.177064572 | 1.191665931 | 1.275606307 |             |   |
| 1.276926734 | 1.129554927                                                                                                                                                             |             |             |             |             |             |   |
| YLR137W     | YLR137W::YLR137W::molecular_function                                                                                                                                    | unknown     | 1           | 1.080778604 |             |             |   |
| 1.150008381 | 0.95600793                                                                                                                                                              | 1.004192081 | 1           | 1.069624571 | 1.120429361 |             |   |
| 1.08608768  | 1.228631431                                                                                                                                                             | 1           | 1.625135305 | 1.445019802 | 1.859873767 |             |   |
| 0.985265168 | 1                                                                                                                                                                       | 1.128411939 | 0.911192734 | 1.557361809 | 1.246697373 | 1           |   |
| 1.43379834  | 1.640578962                                                                                                                                                             | 2.128240008 | 1.064204415 | 1           | 1.249139257 |             |   |
| 1.047919481 | 0.920849122                                                                                                                                                             | 0.750796035 | 0.992752853 | 1           | 1.087583789 |             |   |
| 0.750932629 | 0.811992943                                                                                                                                                             | 0.659451494 | 1.076140569 | 1           | 0.859294773 |             |   |
| 0.704674892 | 0.723967625                                                                                                                                                             | 1.006402696 | 1.408878988 |             |             |             |   |
| YLR139c     | "YLR139c::SLS1::Protein involved in mitochondrial gene expression, may facilitate translation by delivering mRNAs to membrane-bound translational activation complexes" | 1           | 0.934900949 | 0.899965443 | 0.777948848 | 0.681894124 | 1 |
| 0.973140419 | 1.250109386                                                                                                                                                             | 0.662976748 | 0.638665618 | 1           | 1.072460286 |             |   |
| 0.956005033 | 0.961526892                                                                                                                                                             | 0.615039103 | 1           | 0.704082527 | 0.710447539 |             |   |
| 1.00776735  | 0.830737707                                                                                                                                                             | 1           | 0.57334534  | 1.410996527 | 0.66523954  |             |   |
| 0.440630002 | 1                                                                                                                                                                       | 1.040037472 | 1.03548049  | 0.791005668 | 1.030341301 |             |   |
| 0.774719004 | 1                                                                                                                                                                       | 0.626881997 | 0.616731049 | 0.567180313 | 0.735333878 | 1           |   |
| 0.753979193 | 0.732665536                                                                                                                                                             | 0.882659438 | 1.20003437  | 0.609434286 |             |             |   |
| YLR153c     | YLR153c::ACS2::one of 2 acetyl-coA synthetases in yeast                                                                                                                 | 1           |             |             |             |             |   |
| 0.962675633 | 0.611573595                                                                                                                                                             | 1.027867167 | 0.579850037 | 1           | 1.280302652 |             |   |
| 1.250846919 | 0.525289239                                                                                                                                                             | 0.633096914 | 1           | 0.825504304 | 0.734249822 |             |   |
| 0.394986729 | 0.624704557                                                                                                                                                             | 1           | 0.951543248 | 0.83569631  | 1.133182773 |             |   |
| 0.596381288 | 1                                                                                                                                                                       | 0.476034334 | 0.279388084 | 0.36316788  | 0.547443254 | 1           |   |
| 0.753287217 | 0.565439687                                                                                                                                                             | 0.857843557 | 1.056823735 | 0.747964552 | 1           |             |   |
| 0.638908408 | 0.438641867                                                                                                                                                             | 0.557472806 | 0.667878454 | 0.520190367 | 1           |             |   |
| 0.581630035 | 0.438340815                                                                                                                                                             | 0.883289266 | 0.594868593 | 0.64530842  | 0.592797436 |             |   |
| YLR155C     | YLR155C::ASP3-1::nitrogen catabolite-regulated cell-wall L-asparaginase II                                                                                              | 1           | 1.33861877  | 1.352838996 | 1.021413305 | 1.493922401 | 1 |
| 1.115617078 | 1.125684457                                                                                                                                                             | 1.326294716 | 1.393028605 | 1           | 1.424217195 |             |   |
| 1.510319968 | 1.749165633                                                                                                                                                             | 1.182442315 | 1           | 1.131500356 | 0.816486132 |             |   |
| 0.896310108 | 1.33759496                                                                                                                                                              | 1           | 2.019232613 | 2.35000365  | 1.928267273 |             |   |
| 1.611458568 | 1                                                                                                                                                                       | 1.236927819 | 1.289843189 | 1.075352421 | 1.084598046 |             |   |
| 1.018458024 | 1                                                                                                                                                                       | 0.964066262 | 1.530910465 | 1.443878944 | 1.031894465 |             |   |
| 1.480636875 | 1                                                                                                                                                                       | 1.113399264 | 1.337251012 | 0.987101217 | 1.595168463 |             |   |
| 1.092971998 | 1.385237183                                                                                                                                                             |             |             |             |             |             |   |
| YLR157C     | YLR157C::ASP3-2::nitrogen catabolite-regulated cell-wall L-asparaginase II                                                                                              | 1           | 1.195264014 | 1.158443395 | 0.851514283 | 1.287331323 | 1 |
| 0.983665935 | 0.972631589                                                                                                                                                             | 1.129288763 | 1.160261176 | 1           | 1.206391196 |             |   |

|             |                                                              |                                                          |             |             |             |
|-------------|--------------------------------------------------------------|----------------------------------------------------------|-------------|-------------|-------------|
| 1.21409644  | 1.525007671                                                  | 0.985023644                                              | 1           | 1.206455966 | 0.987005394 |
| 0.98505417  | 1.34600482                                                   | 1                                                        | 1.618154691 | 2.124622381 | 2.196164299 |
| 1.24383216  | 1                                                            | 1.234318264                                              | 1.232558699 | 1.223966402 | 1.191799779 |
| 1.018956589 | 1                                                            | 1.086865991                                              | 1.44067844  | 1.504048294 | 0.999079961 |
| 1.381437795 | 1                                                            | 1.040590244                                              | 1.167626225 | 0.930877454 | 1.364894067 |
| 0.955466179 | 1.338829134                                                  |                                                          |             |             |             |
| YLR159W     | YLR159W::YLR159W::molecular_function                         | unknown                                                  | 1           | 1.18015368  |             |
| 1.098321383 | 1.346645849                                                  | 0.973369387                                              | 1           | 1.241376455 | 1.221892646 |
| 1.31898273  | 1.508496558                                                  | 1                                                        | 1.280762214 | 1.636119385 | 1.155680681 |
| 0.629786164 | 0.493459882                                                  | 1.449474781                                              | 0.720073631 | 1           | 0.478302285 |
| 1.000988207 | 0.266983829                                                  | 0.369503829                                              | 1           | 0.984318565 | 0.99496022  |
| 1.044173981 | 0.970307643                                                  | 1                                                        | 0.805024596 | 0.759315178 | 0.951978123 |
| 1.09427269  | 1.074364927                                                  | 1                                                        | 0.874917931 | 0.872639824 | 1.090315834 |
| 1.210168045 | 1.12247555                                                   | 0.922032049                                              |             |             |             |
| YLR161W     | YLR161W::YLR161W::molecular_function                         | unknown                                                  | 1           | 1.097570195 |             |
| 0.992451755 | 1.275796794                                                  | 1                                                        | 1.138919712 | 1.08046407  | 1.057421265 |
| 1.326661869 | 1                                                            | 1.121482423                                              | 1.30113261  | 1.294110125 | 1.076979368 |
| 0.556568159 | 0.52039999                                                   | 1.045780635                                              | 0.510235918 | 1           | 0.673618017 |
| 1.515170443 | 0.557294001                                                  | 0.405032377                                              | 1           | 1.04976002  | 1.026400554 |
| 0.943419868 | 1.045833969                                                  | 1.058855637                                              | 1           | 0.878635196 | 0.804052535 |
| 0.911889245 | 1.165276453                                                  | 1.228044177                                              | 1           | 0.883761926 | 0.996362286 |
| 0.949998421 | 1.167932793                                                  | 1.185132168                                              | 0.92991272  |             |             |
| YLR163C     | YLR163C::MAS1::mitochondrial                                 | processing protease subunit                              |             |             |             |
| 0.913614934 | 0.895110963                                                  | 1.189707356                                              | 0.905546337 | 0.937103459 |             |
| 1.171973629 | 1.052034159                                                  | 1.102733122                                              | 1.001880156 | 0.961464731 |             |
| 0.899795798 | 0.985841893                                                  | 1                                                        | 1.574474905 | 1.354415347 | 1.414965655 |
| 1.040273447 | 1                                                            | 1.052246528                                              | 0.726532384 | 0.590723148 | 0.970117807 |
| 1.44166583  | 1.534478757                                                  | 1.257099385                                              | 1.168501937 | 1.08274214  | 1           |
| 1.453039129 | 1.256233138                                                  | 1.168843004                                              | 0.836607315 | 0.889080577 | 1           |
| 1.269268777 | 1.230024187                                                  | 0.953979239                                              | 0.841387876 | 1.018903542 | 1.034111939 |
| YKR062W     | YKR062W::TFA2::Small subunit of TFIIE                        | transcription factor                                     | 1           |             |             |
| 0.945322286 | 1.02487581                                                   | 1.09154939                                               | 1.260306889 | 1           | 0.941849837 |
| 0.967263837 | 1.141212154                                                  | 1.079779037                                              | 1           | 0.91949566  | 1.045464774 |
| 1.005303677 | 1.064214503                                                  | 1                                                        | 1.177807222 | 0.720174408 | 0.857020341 |
| 1.046387737 | 1                                                            | 1.367015111                                              | 0.879313635 | 1.102517828 | 1.029520731 |
| 1.017504675 | 1.105163611                                                  | 1.034804173                                              | 1.071529713 | 1.151107555 | 1           |
| 1.308699218 | 1.314883933                                                  | 0.789650783                                              | 0.917844334 | 1.163105007 | 1           |
| 1.324624825 | 1.130075341                                                  | 0.982716825                                              | 1.402668534 | 0.953007712 | 1.080519988 |
| YEL076c     | YEL076c::YEL076C::molecular_function                         | unknown                                                  | 1           | 0.899794695 |             |
| 0.608387731 | 1.059191176                                                  | 0.38265944                                               | 1           | 1.076217447 | 1.046962044 |
| 0.573713131 | 0.454098348                                                  | 1                                                        | 0.994184106 | 0.801871333 | 0.271989181 |
| 0.844906169 | 1.816757652                                                  | 1.892139865                                              | 1.608479475 | 1.118118119 |             |
|             | 1                                                            | 0.896751201                                              | 0.816526739 | 1.137645213 | 1.141631541 |
| 0.995874251 | 1                                                            | 0.61280554                                               | 0.369859871 | 0.727037801 | 0.872460119 |
| 0.26220802  | 1                                                            | 0.445381549                                              | 0.878398164 | 0.524612378 | 0.659436001 |
| 0.555145619 |                                                              |                                                          |             |             |             |
| YER001w     | "YER001w::MNN1::Adds the terminal mannose to the outer chain | branches of N-linked mannan, masking mannosylphosphate." | 1           | 0.687146736 |             |
| 0.606989011 | 0.947765494                                                  | 0.741907266                                              | 1           | 0.756949987 | 0.801310907 |
| 0.879819481 | 0.81372478                                                   | 1                                                        | 0.657227586 | 0.558629375 | 0.339303857 |
| 1.461674274 | 1                                                            | 0.712240063                                              | 1           | 0.552086179 |             |
| 0.251901522 | 0.272453868                                                  | 0.726252224                                              | 1           | 0.739970075 | 0.667426461 |
| 0.986280187 | 1.135574248                                                  | 1.177301492                                              | 1           | 0.808258151 | 0.560217617 |
| 0.511100215 | 0.569525907                                                  | 0.449564801                                              | 1           | 0.570090183 | 1.059599977 |
| 0.778825887 | 0.671448998                                                  | 0.908897701                                              |             |             |             |
| YER003c     | YER003c::PMI40::catalyzes the                                | interconversion of fructose-6-P and                      |             |             |             |
| mannose-6-P | 1                                                            | 0.97264023                                               | 0.804952554 | 0.835366407 | 0.742291048 |

|             |                                                                                                                                                                                                                        |             |             |             |             |
|-------------|------------------------------------------------------------------------------------------------------------------------------------------------------------------------------------------------------------------------|-------------|-------------|-------------|-------------|
| 1.039384687 | 1.019163494                                                                                                                                                                                                            | 0.779880502 | 0.818458816 | 1           | 0.796399865 |
| 0.720441364 | 0.641760931                                                                                                                                                                                                            | 0.997290514 | 1           | 1.279969339 | 0.756643845 |
| 0.783821603 | 1.120528988                                                                                                                                                                                                            | 1           | 0.700570021 | 0.333333259 | 0.239204688 |
| 0.887560206 | 1                                                                                                                                                                                                                      | 0.905348293 | 0.608452296 | 0.657551575 | 1.140162942 |
| 1.034373029 | 1                                                                                                                                                                                                                      | 0.920448051 | 0.52925671  | 0.355912462 | 0.484767438 |
| 0.527502175 | 1                                                                                                                                                                                                                      | 0.773815963 | 0.437444516 | 0.611036007 | 0.763371894 |
| 0.758431979 | 0.737275415                                                                                                                                                                                                            |             |             |             |             |
| YER005w     | YER005w::YND1::Yeast Nucleoside Diphosphatase                                                                                                                                                                          | 1           | 1.32081563  |             |             |
| 0.871863815 | 1.260415811                                                                                                                                                                                                            | 0.913980165 | 1           | 1.243523951 | 1.332250206 |
| 1.00554049  | 1.038200624                                                                                                                                                                                                            | 1           | 1.084006833 | 1.020456394 | 0.798412836 |
| 1.197240426 | 1                                                                                                                                                                                                                      | 0.998235039 |             | 0.627712455 | 0.807931905 |
|             | 1                                                                                                                                                                                                                      | 0.942837919 | 1.04941742  | 1.141074022 | 0.974858891 |
| 0.937274855 | 0.764881173                                                                                                                                                                                                            | 0.637004005 | 0.784530102 | 1           | 0.84837926  |
| 0.710919159 | 0.877264786                                                                                                                                                                                                            | 0.770790765 | 0.63542983  | 0.656718    |             |
| YER020w     | YER020w::GPA2::homologous to mammalian G proteins; potential role in regulation of cAMP levels                                                                                                                         | 1           | 0.716747679 | 0.987174809 | 0.877282292 |
| 0.696409698 | 1                                                                                                                                                                                                                      | 0.982752284 | 1.106011701 | 0.946144707 | 0.874686859 |
| 1.24343063  | 1.513462004                                                                                                                                                                                                            | 1.443919208 | 1.122950442 | 1           | 1.822656502 |
| 1.063764762 | 1.585840454                                                                                                                                                                                                            | 1.483128508 | 1           | 2.319344656 | 2.162943348 |
| 1.72627437  | 1.346131447                                                                                                                                                                                                            | 1           | 1.40882914  | 1.588841243 | 1.755297829 |
| 1.294909544 | 1                                                                                                                                                                                                                      | 1.06924301  | 1.18278269  | 1.297705412 | 1.01345594  |
| 0.896709927 | 1                                                                                                                                                                                                                      | 1.132867147 |             | 1.221880332 | 1.352560125 |
| 0.741653531 |                                                                                                                                                                                                                        |             |             |             |             |
| YER022w     | YER022w::SRB4::subunit of RNA polymerase II holoenzyme/mediator complex                                                                                                                                                | 1           | 0.662052586 | 0.860549676 | 0.987172798 |
| 0.916942242 | 0.958545499                                                                                                                                                                                                            | 0.877615528 | 0.904747734 | 1           | 0.830261147 |
| 0.897940405 | 0.919697788                                                                                                                                                                                                            | 1.007953335 | 1           | 0.902404064 | 0.670688946 |
| 0.792552377 | 0.977872899                                                                                                                                                                                                            | 1           | 1.137776525 | 1.747573211 | 1.689173621 |
| 1.025339827 | 1                                                                                                                                                                                                                      | 1.066801682 | 1.197989069 | 1.183256917 | 1.078863791 |
| 1.307862561 | 1                                                                                                                                                                                                                      | 1.042555195 | 0.732852826 | 1.326857519 | 0.796785121 |
| 0.720695023 | 1                                                                                                                                                                                                                      | 1.185513523 | 0.976341292 | 0.9561158   | 0.925669639 |
| 0.782751178 | 2.126015049                                                                                                                                                                                                            |             |             |             |             |
| YER024w     | "YER024w::YAT2::The Yat2p protein shows significant homology with the known carnitine acetyltransferase associated with the outer-mitochondrial membrane, Yat1p, and also functions as a carnitine acetyltransferase." | 1           |             |             |             |
| 1.164947181 | 1.096809796                                                                                                                                                                                                            |             | 0.972622387 | 1           | 1.105436056 |
| 0.936047121 | 0.950668236                                                                                                                                                                                                            | 1           | 1.568696973 | 1.226791514 | 0.866301488 |
| 0.883344765 | 1                                                                                                                                                                                                                      | 0.781678851 | 0.716810639 | 0.975480746 | 0.787636541 |
| 0.391160107 | 0.680995401                                                                                                                                                                                                            | 0.478559103 | 0.423982244 | 1           | 1.289202005 |
| 1.165307526 | 0.972257754                                                                                                                                                                                                            | 1.186124183 | 1.183097743 |             | 0.870524396 |
| 1.022301808 | 0.8404303                                                                                                                                                                                                              | 0.807321678 | 1.048875322 | 1           | 0.911065803 |
| 1.080245756 | 0.856906399                                                                                                                                                                                                            | 1.259815831 | 0.935765809 | 3.586556074 |             |
| YER026c     | YER026c::CHO1::phosphatidylserine synthase                                                                                                                                                                             | 1           | 2.333245676 |             |             |
| 1.126543592 | 1.040755497                                                                                                                                                                                                            | 1.427087713 | 1           | 1.281061269 | 1.134681413 |
| 1.121283694 | 1.149390267                                                                                                                                                                                                            | 1           | 1.055509279 | 1.20525089  | 1.341316527 |
| 0.864238319 | 1                                                                                                                                                                                                                      | 1.541238921 | 1.308723032 | 1.256122303 | 1.15282708  |
| 1.639096594 | 0.990715498                                                                                                                                                                                                            | 1.431707082 | 1.226983232 | 1           | 1.344170459 |
| 1.516629982 | 2.169337754                                                                                                                                                                                                            | 1.348081402 | 1.132352107 | 1           | 0.946651756 |
| 1.443548173 | 1.840251212                                                                                                                                                                                                            | 1.007523028 | 0.499173415 | 1           | 1.327168589 |
| 1.268125939 | 1.222254177                                                                                                                                                                                                            | 1.086119412 | 1.400086572 | 1.36597339  |             |
| YER028c     | YER028c::YER028C::molecular_function unknown                                                                                                                                                                           | 1           |             |             |             |
| 1.335097517 | 0.960030067                                                                                                                                                                                                            | 1.263182082 | 1           | 1.083692428 | 1.001835249 |
| 1.094109395 | 1.05176203                                                                                                                                                                                                             | 1           | 1.093793219 | 1.264458648 | 1.612986533 |
| 0.942941236 |                                                                                                                                                                                                                        | 0.526785242 | 0.52719395  | 1           | 1.010472913 |
| 1.268646451 | 1.788536814                                                                                                                                                                                                            | 1.082303154 |             | 0.808012793 | 0.662688746 |
| 0.916365687 | 0.836725941                                                                                                                                                                                                            | 0.867882909 | 1           | 0.871333684 | 0.754082853 |

|         |                                                                                                                                           |             |             |             |             |             |              |
|---------|-------------------------------------------------------------------------------------------------------------------------------------------|-------------|-------------|-------------|-------------|-------------|--------------|
|         | 1.01643971                                                                                                                                | 1.054788702 | 0.571893902 | 1           | 0.799460828 | 0.716099741 |              |
|         | 0.795190818                                                                                                                               | 0.616405306 | 0.727473192 | 1.534093225 |             |             |              |
| YKR064W | YKR064W::YKR064W::molecular_function unknown                                                                                              |             |             |             |             | 0.922233979 |              |
|         | 0.95319068                                                                                                                                | 1.053293501 | 1.028896418 |             | 1.027908044 | 1.019298467 |              |
|         | 0.871035289                                                                                                                               |             | 0.906635233 | 0.978388238 |             | 0.940808454 |              |
|         | 1.365360379                                                                                                                               |             | 0.866438363 | 1           |             | 1.038972943 |              |
|         | 0.830837991                                                                                                                               | 0.952615004 | 0.859787437 | 1.22066969  |             | 1.113799041 | 1            |
|         | 1.266932738                                                                                                                               |             | 0.754086297 | 1.166462491 | 0.622020117 | 1           | 0.8944445434 |
|         | 0.661826453                                                                                                                               | 0.737322687 | 0.65402436  |             |             | 0.746031646 |              |
| YKR066C | YKR066C::CCP1::Cytochrome-c peroxidase                                                                                                    |             |             |             |             | 1           | 1.097430385  |
|         | 1.196338817                                                                                                                               | 0.907075275 | 0.719281599 | 1           | 1.066183018 | 1.070813702 |              |
|         | 0.999436362                                                                                                                               | 1.107634452 | 1           | 1.09065069  | 0.984126999 | 1.511358969 |              |
|         | 1.020599658                                                                                                                               | 1           | 2.376614374 | 1.40111348  | 2.912203441 | 3.18175601  | 1            |
|         | 1.143471402                                                                                                                               | 0.698424405 | 1.032162299 | 1.388566761 | 1           | 0.646808487 |              |
|         | 0.239493398                                                                                                                               | 0.114640285 | 0.881264414 | 0.733307124 | 1           | 0.337958224 |              |
|         | 0.14462395                                                                                                                                | 0.07626047  | 0.117632939 | 1.125198394 | 1           | 0.497780691 |              |
|         | 0.231127172                                                                                                                               | 0.324217392 | 1.080699434 | 1.194840141 | 1.168082408 |             |              |
| YKR068C | YKR068C::BET3::Hydrophilic protein that acts in conjunction with SNARE proteins in targeting and fusion of ER to Golgi transport vesicles |             |             |             |             |             | 1            |
|         | 1.171887932                                                                                                                               | 1.187829435 | 0.948381033 | 1.47592778  | 1           | 0.973512342 |              |
|         | 0.980057342                                                                                                                               | 1.146913288 | 1.165275399 | 1           | 0.954576853 | 0.988249702 |              |
|         | 1.420202915                                                                                                                               | 1.016101596 | 1           | 1.190462018 | 0.841757161 | 0.889705684 |              |
|         | 1.296114882                                                                                                                               | 1           | 1.608730018 | 1.170266643 | 1.585735809 | 1.103926128 | 1            |
|         | 1.196198916                                                                                                                               | 1.405116957 | 0.99353316  | 1.235983545 | 1.265716278 | 1           |              |
|         | 1.126055406                                                                                                                               | 1.749113314 | 1.383542023 | 1.045122562 | 1.658544695 | 1           |              |
|         | 1.158733619                                                                                                                               |             | 0.788028697 | 1.994868449 | 1.189936596 | 2.755588793 |              |
| YKR070W | YKR070W::YKR070W::molecular_function unknown                                                                                              |             |             |             |             | 1           | 1.148990173  |
|         | 1.046225675                                                                                                                               | 1.202484381 | 1.147232051 | 1           | 1.015948934 | 1.071317015 |              |
|         | 1.253992849                                                                                                                               | 1.16517477  | 1           | 1.280580051 | 1.249716876 | 1.113003205 |              |
|         | 1.2818101                                                                                                                                 | 1           | 1.023786863 | 0.962093273 | 1.146158774 | 0.937886654 | 1            |
|         | 1.157848191                                                                                                                               | 1.064315169 | 1.063738813 | 1.09285946  | 1           | 1.212674957 |              |
|         | 1.207181365                                                                                                                               | 1.309943842 | 1.123881331 | 1.124584804 | 1           | 1.427077654 |              |
|         | 1.215718667                                                                                                                               | 1.24588162  | 1.270330185 | 1.049957161 | 1           | 1.424804134 |              |
|         | 0.984669799                                                                                                                               | 1.042777721 | 1.087508245 | 0.78301956  | 0.935166396 |             |              |
| YKR072C | YKR072C::SIS2::Involved in cell cycle control and ion homeostasis                                                                         |             |             |             |             |             | 1            |
|         | 1.249457826                                                                                                                               | 1.205633675 | 1.193038294 | 0.935321692 | 1           | 1.349299521 |              |
|         | 1.428762776                                                                                                                               | 1.034740373 | 0.949968357 | 1           | 1.204822432 | 1.063283512 |              |
|         | 0.954196638                                                                                                                               | 1.109627877 | 1           | 1.119211256 |             |             |              |
|         | 1.082435986                                                                                                                               |             | 0.782736511 | 1           | 0.965127403 | 1.068045032 | 1.243689404  |
|         | 1.21956496                                                                                                                                | 1.243267396 | 1           | 0.922442571 | 0.796794046 | 0.814360984 |              |
|         | 1.427188698                                                                                                                               | 1.029972831 | 1           | 0.651066192 | 0.805827715 | 0.843359149 |              |
|         | 0.850196192                                                                                                                               | 0.765399215 | 1.404500872 |             |             |             |              |
| YKR086W | YKR086W::PRP16::putative ATP-binding protein                                                                                              |             |             |             |             | 1           | 1.182318841  |
|         | 1.429750903                                                                                                                               | 1.439953895 | 1.262097388 | 1           | 1.637480959 | 1.340379301 |              |
|         | 1.229441504                                                                                                                               | 0.977232423 | 1           | 1.291589026 | 1.335366315 | 0.883873486 |              |
|         | 1.346081188                                                                                                                               |             | 2.635787728 |             | 1.397601921 | 1.2473962   | 1            |
|         |                                                                                                                                           | 0.926432123 | 1           | 1.12717719  | 1.166191343 | 1.346984582 | 0.94570938   |
|         | 1.262820824                                                                                                                               | 1           | 1.287582134 | 1.105665399 | 1.20455549  | 1.383738771 |              |
|         | 1.008435673                                                                                                                               | 1           | 0.837530764 | 0.780134721 | 0.842361148 | 0.973892108 |              |
|         | 0.909806619                                                                                                                               | 1.358968488 |             |             |             |             |              |
| YKR088C | YKR088C::YKR088C::molecular_function unknown                                                                                              |             |             |             |             | 1           | 1.641625418  |
|         | 1.068901004                                                                                                                               | 1.07279158  | 1.171525667 | 1           | 1.209259988 | 1.072897313 |              |
|         | 1.05041813                                                                                                                                | 0.97653956  | 1           | 1.423237059 | 1.112745051 | 0.918301612 |              |
|         | 0.937013065                                                                                                                               | 1           | 1.352898508 | 0.784586103 | 0.813614645 | 0.721080342 | 1            |
|         | 1.097799265                                                                                                                               | 0.971746831 | 1.064491663 | 1           | 1.51537245  | 1.303494086 |              |
|         | 1.540202377                                                                                                                               | 1.64654607  | 1.38286075  | 1           | 1.457511931 | 1.516523985 |              |

1.457602702 0.945394953 1.297300588 1 1.215956315 1.00031595  
0.697497137 1.239604842 0.780638816 1.788899817  
YKR090W YKR090W::PXL1::Paxillin-like protein 1 1 1.177233087  
1.293398515 1.177418462 0.963759294 1 1.400825058 1.3850724  
1.100827548 0.912269426 1 1.114233363 1.046284002 0.963969545  
1.173195606 1 1.001601194 0.9035872 0.76793846 0.479424292 1  
0.971213124 1.078710019 0.989109126 0.880355933  
0.998974396 1 1.592169844 1.08739903 0.986112811 1.002093341  
0.686367044 1 1.09374543 0.981703428 0.88284214 0.960469538  
0.968574806 0.707504217  
YKR092C YKR092C::SRP40::Suppressor of mutant AC40 subunit of RNA polymerase  
I and III (high serine) 1 0.801545273 0.643902279 0.822835066 0.552877198 1  
0.770629314 0.733101062 0.646249158 0.813107619 1 0.645968943  
0.524944387 0.500733574 0.753938844 1 0.737596929 0.646686311  
0.68790931 0.847313711 1 0.667201793 1.128103795 0.763312888  
0.390475005 1 0.687851712 0.690511477 1.03220979 0.950508446  
0.799339583 1 0.474387605 0.757646615 0.445875724 0.831295538  
0.506647371 1 0.718592855 1.008992653 1.007301407 0.628717575  
0.579070402  
YKR094C YKR094C::RPL40B::Homology to rat L40 1 1.03313511  
1.176058167 0.835102873 1.553707735 1 0.955880529 0.893767475  
1.395796043 1.262406269 1 0.839301775 0.960643285 0.876800333  
0.930889669 1 0.845018533 0.382566123 0.23810471 0.558777907 1  
1.78888753 1.331282062 0.842323971 0.879571401 1 0.858959715  
0.740184937 0.981327932 1.27047025 1 1.204807135 1.705251643  
0.858959738 0.76629714 1.76741138 1 1.378004815 1.453038694  
1.00778165 2.263109972 1.156832344 1.112918128  
YKR096W YKR096W::YKR096W::molecular\_function\_unknown 1 1.03621469  
1.097092444 1.455756155 1.030137285 1 1.187011382 1.285550729  
1.287729412 1.0759259 1 1.148243341 1.342300152 1.253838378  
1.280544003 1 1.118933071 3.120900074 2.448251358 0.727941796 1  
0.66557797 0.286266824 1 1.187362711 1.181242463 1.034133229  
1.222907931 1.197851432 1 0.800412354 0.784959604 0.726199547  
0.967519689 0.781055848 1 0.745706712 0.643875788 0.732213271  
0.705010305 0.795104551 0.801195979  
YLL004w YLL004w::ORC3::Third subunit of the origin recognition complex 1  
1.029067199 0.879512834 1.077630698 1.169893674 1 1.106952387  
1.064490098 1.164380118 0.964900184 1 0.676937696 0.783884595  
0.783077468 1.1088418  
1 1.022842112 0.878781814 0.957112653 0.876176614 1.151935059 1  
1.028773494 1.293374443 0.697549894 1 1.06556434  
0.976629416 1.263347784 0.750930251 1.087524994  
YLL006w YLL006w::MMM1::Involved in mechanism by which mitochondrial shape is  
established or maintained 1.130321445 1.016964482 1.312703432  
0.997569463 1.351009881 1.001684857 0.753327784  
1.286409382 1.204739725 0.653228412 1.061224068 1 1.340748844  
0.942375932 1.330707598 0.68613791 1 1.257636615  
0.619445919 1 1.006235228 0.929914177 0.958021063 1.23764242  
1.003904445 1 1.046813145 0.853818598 0.804432777 0.786145302  
0.508744881 1 0.938814176 0.782794074 0.832273291 0.741313603  
0.824170437 0.971942653  
YLL008w YLL008w::DRS1::nucleolar DEAD-box protein required for synthesis of  
60S ribosomal subunits 1 0.75770364 0.796268038 0.814611138 1  
0.773948291 0.59868977 0.837581572 0.96786828 1 0.496943861  
0.28246298 0.260054304 0.874619768 1 0.261340226 0.114427906  
1 0.349214864 1 0.64570558 0.469668793  
0.551795719 0.861549901 0.714934379 1 0.570651627 0.497024735

0.357720927 0.826135736 0.837895674 1 0.518154832 0.539536393  
 0.808390161 0.960792769 0.463738551 0.645334878  
 YLL010C YLL010C::PSR1::Plasma membrane Sodium Response 1 1  
 0.79262818 0.881325077 0.723728141 0.604717554 1 0.962529697  
 0.953581167 0.67862492 0.622397348 1 0.987317579 0.982273761  
 0.821311398 0.638479047 1 0.804381653 0.581332328 1.068596925  
 0.777820497 1 0.626164348 1.062239243 0.685329867 1  
 0.973831071 0.920358143 1.016387697 0.826724273 1 0.937989547  
 0.718082851 0.526156105 0.779837849 0.723847703 1 0.862805148  
 0.665439416 1.025496459 0.686969179 1.028352056 0.910648927  
 YLL012W YLL012W::YLL012W::molecular\_function unknown 1 1.11518371  
 1.00232605 1.269927438 0.838789236 1 1.136927641 0.966736468  
 1.086663765 1.087769902 1 0.738237122 0.82398063 0.768784243  
 1.17606956 1.000519744 1  
 0.534110142 0.582613848 1.137627123 1.399067825 1.004715554 1  
 0.461100732 0.473402024 0.440514162 1.885120412 1.117996373 1  
 0.421420772 0.464820618 1.53962001 0.838858486 0.737042185 0.61556368  
 YLL014W YLL014W::YLL014W::molecular\_function unknown 1 1.556398952  
 1.57307726 1.006853863 1.835775735 1 1.094954187 0.971880979  
 1.647204743 1.527430419 1 1.145334036 1.228109423 1.745129912  
 0.992538349 1 1.289011239 0.956438973 1.100683283 1.310463915 1  
 1.255806918 1.818902673 1.444722516 0.970731871 1 0.734940038  
 0.814542209 0.478556383 0.975986825 0.729689854 1 0.691739605  
 1.212932574 0.721266026 0.843203108 1.191523449 1 0.976008722  
 1.139013805 0.670260556 1.546661845 1.205583691 0.865116491  
 YLL028W YLL028W::TPO1::Polyamine transport protein 1 0.891176  
 0.928036013 1.003199643 0.581222391 1 1.156967697 1.149711869  
 0.856993599 0.779472702 1 1.889227284 1.268117981 0.99467041  
 0.534458316 1 0.814386628 0.57733979 0.853513838 0.462006307 1  
 0.548171469 0.672989674 0.377800647 0.478845874 1 0.847566096  
 0.665691761 0.876060919 1.270072618 0.730733009 1 0.664876974  
 0.41282592 0.413785848 0.708181717 0.638139598 1 0.651324978  
 0.473655212 0.669645265 0.773847992 1.163216996 0.550767503  
 YLL030C YLL030C::YLL030C::molecular\_function unknown 1.039206206  
 0.921352305 0.810586341 0.833091694  
 1 0.462320149 0.782226464 0.86624756 1  
 0.68381519 0.551241708 1 0.759380763 0.64144898  
 0.92483246 0.890723225 1 0.929351262 1.166606573 0.920623854  
 0.985151274 0.89306598 0.965531865 1.063628096  
 YLL032C YLL032C::YLL032C::molecular\_function unknown 1.098308028  
 0.925824898 0.850637186 0.916879252  
 0.864438153 0.808095786 0.704645281 0.856615375 1 1.303408515  
 0.587704062 0.439577923 1 0.706959734 1  
 1.135356235 1.195765997 1.002803963 1.180121523 1 0.786309217  
 0.808952653 0.56261625 0.931327001 1 1.239745579 0.915333574  
 1.059532161 0.945522423 1.047278638 2.042830744  
 YLL034C YLL034C::YLL034C::helicase 1 0.941194213 1.006830302  
 0.961152851 1.107259228 1 1.085241011 0.863412951 1.211379376  
 1.154983624 1 0.729539672 0.634053188 0.959335471 1.074063383 1  
 0.706222251 0.556772282 0.474759387 0.85707898 1 1.001658121  
 1.005528188 0.570195876 0.637358378 1 1.65691534 1.138875409  
 1.077458993 1.182759725 1 0.84576829 1.235482711 1.212394731  
 0.854387082 1.013816486 1 1.061112225 1.575811682 0.856988336  
 1.107324254 0.728747656  
 YLL034C YLL034C::YLL034C::helicase  
 1 0.664573937 0.614743982 0.591163785

|         |                                                                                                   |             |             |             |             |             |   |
|---------|---------------------------------------------------------------------------------------------------|-------------|-------------|-------------|-------------|-------------|---|
|         | 0.813549286                                                                                       | 0.890850898 | 1           | 0.831742203 | 0.593150033 | 0.511605327 |   |
|         | 1.06184734                                                                                        | 1.119209153 | 1           | 0.78729062  | 0.793925147 | 0.95013506  |   |
|         | 1.248426586                                                                                       | 0.770670536 | 1.075266311 |             |             |             |   |
| YLL036c | "YLL036c::PRP19::Required for error prone repair, induced mitotic recombination, and sporulation" |             |             |             |             |             |   |
|         | 1                                                                                                 | 0.988086157 | 1.045622762 | 1.245721696 |             |             |   |
|         | 0.996800641                                                                                       | 1           | 1.172214572 | 1.173335116 | 1.060511428 | 1.036909269 | 1 |
|         | 0.914725831                                                                                       | 0.869743677 | 0.751420787 | 1.012125305 | 1           | 0.714088367 |   |
|         | 0.590561404                                                                                       | 0.684674294 | 1           | 0.814985247 | 0.651758759 | 0.527055844 |   |
|         | 0.655450824                                                                                       | 1           | 1.044778177 | 1.026553751 | 1.034454088 | 1.032929715 |   |
|         | 0.875977523                                                                                       | 1           | 1.147425142 | 0.920204084 | 0.864869429 | 0.982904791 |   |
|         | 1.053041564                                                                                       | 1           | 0.92092137  | 0.769111719 | 0.97197526  | 0.787957475 |   |
|         | 0.918465067                                                                                       | 0.796817863 |             |             |             |             |   |
| YLL038C | YLL038C::ENT4::epsin N-terminal homology-containing protein 1                                     |             |             |             |             |             |   |
|         | 0.683746281                                                                                       | 1.048491031 | 0.509328329 | 1           | 0.910273511 | 1.005694451 |   |
|         | 0.771099875                                                                                       | 1           | 0.827461393 | 0.841964787 | 0.368520595 | 0.991085137 | 1 |
|         | 0.546205558                                                                                       | 0.493404152 | 1           | 1.403023355 | 2.039759614 |             |   |
|         | 0.85066302                                                                                        | 1           | 0.963318069 | 1.153029691 | 1.1193558   | 1.064346554 |   |
|         | 1.115744016                                                                                       | 1           | 0.95174779  | 0.521963379 | 0.825184703 | 1.044170761 |   |
|         | 0.671861511                                                                                       | 1           | 0.833746939 | 0.703273146 | 1.102881723 | 0.83143408  |   |
|         | 0.960037121                                                                                       | 0.687364863 |             |             |             |             |   |
| YJL038C | YJL038C::YJL038C::molecular_function unknown                                                      |             |             |             |             |             |   |
|         | 1                                                                                                 | 1.613023984 |             |             |             |             |   |
|         | 1.256257094                                                                                       | 1.440271508 | 1           | 1.026945473 | 1.122503815 |             |   |
|         | 1.580671195                                                                                       | 1           | 1.229352796 | 1.141401356 | 1.490782772 | 1.245575029 | 1 |
|         | 0.527869798                                                                                       | 0.92391936  | 1.338488192 | 1           | 1.45226686  | 5.050988358 |   |
|         | 4.781052948                                                                                       | 1.817090909 | 1           | 0.791421096 | 0.947874442 | 0.989595373 |   |
|         | 0.899369947                                                                                       | 1           |             |             | 1           | 1.006925781 |   |
|         | 1.383206041                                                                                       | 1.319409393 | 1.068703072 | 1.851984492 | 1.09453     |             |   |
| YLR273C | YLR273C::PIG1::Putative type 1 phosphatase regulatory subunit; interacts with Gsy2p               |             |             |             |             |             |   |
|         | 1                                                                                                 | 1.068505863 | 1.248641958 | 1.64431907  | 1.444735849 | 1           |   |
|         | 1.417139334                                                                                       | 1.926319617 | 1.480297294 | 1.395534808 | 1           | 1.097928183 |   |
|         | 1.468886895                                                                                       | 1.7230198   | 1.311226292 | 1           | 1.051863249 | 0.907392687 |   |
|         | 2.015650593                                                                                       | 1.855742865 | 1           | 1.154457292 | 2.006377578 | 2.130606215 |   |
|         | 1.264207844                                                                                       | 1           | 1.024132172 | 1.313907925 | 1.122351831 | 0.838046751 |   |
|         | 1.070866611                                                                                       | 1           | 0.884294866 | 0.938840914 | 1.846057098 | 1           |   |
|         | 1.336003964                                                                                       | 1.177220328 |             | 1.758778673 | 0.971066988 |             |   |
| YJL041W | YJL041W::NSP1::Nucleoskeletal protein found in nuclear pores and spindle pole body                |             |             |             |             |             |   |
|         | 1                                                                                                 | 1.146351086 | 1.142128946 | 1.017295381 | 1.002582165 | 1           |   |
|         | 0.921744113                                                                                       | 0.904819253 | 1.014971653 | 1.017757858 | 1           | 1.020165088 |   |
|         | 1.154281461                                                                                       | 1.060413408 |             | 0.620787568 | 0.762817345 |             | 1 |
|         |                                                                                                   | 1           | 0.9294624   | 0.84144621  | 1.289634584 |             |   |
|         | 1.021372018                                                                                       | 1.134159944 | 1           | 1.258948148 | 1.94526979  | 1.486754803 |   |
|         | 1.243390807                                                                                       | 1.052158724 | 1           | 1.089642602 | 1.272001027 | 0.940915644 |   |
|         | 1.042232723                                                                                       | 0.785900694 | 1.056002518 |             |             |             |   |
| YLR275W | YLR275W::SMD2::U1 snRNP protein of the Sm class                                                   |             |             |             |             |             |   |
|         | 1                                                                                                 | 0.925936099 |             |             |             |             |   |
|         | 1.430011795                                                                                       | 0.947440385 | 1.729300671 | 1           | 0.911900419 | 0.884159023 |   |
|         | 1.557300849                                                                                       | 1           | 0.923669567 | 1.061791814 | 1.202815975 | 1           |   |
|         | 0.359222768                                                                                       | 0.421363409 | 0.710806869 | 1.195530959 | 1           | 1.993765819 |   |
|         | 3.36183432                                                                                        | 2.283296954 | 1.243935541 | 1           | 0.714560498 | 0.580138261 |   |
|         | 0.599975773                                                                                       | 0.891683258 | 1           | 1.332122657 | 0.942647777 |             | 1 |
|         |                                                                                                   | 1.359024522 | 1.36288782  | 1.197853659 |             |             |   |
| YJL043W | YJL043W::YJL043W::molecular_function unknown                                                      |             |             |             |             |             |   |
|         | 1.173416522                                                                                       |             |             |             |             |             |   |
|         | 0.912193217                                                                                       | 0.814502225 | 0.983111108 | 1.084103021 |             |             |   |
|         | 0.956066155                                                                                       | 1           | 0.619435279 |             |             | 1           |   |
|         | 0.625240428                                                                                       | 1.060988217 | 0.67312193  | 1           | 0.89182654  | 0.842127434 |   |
|         | 0.927542094                                                                                       | 1.280476462 | 1.109226759 | 1           | 0.799358642 | 0.861339888 |   |
|         | 1.297773134                                                                                       | 1.66977508  | 1.016497816 | 1           | 1.074954808 | 0.902857763 |   |
|         | 1.03630818                                                                                        | 1.354717702 | 0.710131055 |             |             |             |   |



YLR277C YLR277C::YSH1::subunit of Polyadenylation factor I (PF I) 1  
0.923385788 0.926561873 1.008118632 0.867051332 1 1.143329366  
1.209343408 0.883737448 0.846133506 1 0.958698053 0.948318339  
0.61785058 0.946639241 1 1.01051625 0.64915632 0.844550801  
0.994681778 1 0.988140059 1.118025685 0.852690268 0.715873822 1  
0.949781966 1.13986917 1.004584275 0.95062879 0.992101697 1  
0.942878426 0.778003528 0.660440883 0.733902076 0.792400323 1  
1.127493822 1.00456917 0.919673 0.816094519 1.011936374 0.715384783  
YJL045W YJL045W::YJL045W::not yet annotated 1 1.111397185 0.704430019  
0.995176696 0.467329295 1 1.321786958 1.502842713 0.738299146 1  
0.922065745 0.804495773 1.681367801 0.902589251 1 1.133267693  
2.155252444 1.194217431 1 0.641879698 1.009064296 0.726169167 1  
0.78586665 0.833573536 1.011553645 1.451959204 1 0.732050319  
0.543154064 0.836885101 0.832995557 1.327993908 1 0.503887868  
0.947297131 0.326378837 1.330338534 0.892260903  
YLR279W YLR279W::YLR279W::molecular\_function unknown 0.847125485  
1.034046735 0.8386095 1.072949981 0.772162556 1.018909612  
0.747491846 0.79328775 0.891858992 1 0.682272326  
0.502679701 1 2.027870625 1 0.7928907  
1.084047857 1.282133355 1.300701878 1.22660943 1 0.924474479  
1.225299073 1.205248942 2.367357658 1 0.865505014 0.725290467  
0.995101365 0.756190659 1.518315965 0.45182196  
YJL047C YJL047C::RTT101::Regulator of Ty1 Transposition 1 0.832165957  
0.789305233 1.085354279 0.827889833 1 0.896549687 0.997995599  
0.910337093 0.826715298 1 1.07881435 0.960135316 0.765599132  
1.164639449 1 1.099590893 0.823660941 0.804953712  
0.516116891 1.054779571 0.887142846 0.997060677 1  
0.991842846 0.827878111 1.241900239 1.034240874 0.710302494 1  
1.430025607 1.255821928 1.257749293 1.297713907 1.072639421  
YLR281C YLR281C::YLR281C::molecular\_function unknown 1  
1.001010891 1 1.353459847 1  
0.860557146 0.982823332 1.700198979 1.367185449 1 0.34786925  
0.768903702 0.867157985 0.5041671 1 0.571469501 1.0928387  
0.476651249 1 1.075870691 1.153093804 1.299062719 1.785052461  
1.326944895 1 0.912799622 0.456537903 0.698099172 1.389244364  
0.496431436 1 0.800149123 0.490052344 0.741411293 0.532157264  
0.861426569 0.402787047  
YJL049W YJL049W::YJL049W::molecular\_function unknown 1 0.796135603  
0.884199066 0.815620676 0.964954022 1 0.762159598 0.789945916  
1.096642183 0.85722987 1 0.863989722 1.081422747 1.263626772  
0.874664205 1 0.819978213 0.821596481 0.820292312 0.871854481 1  
2.466542517 2.668659742 1.574090288 0.964365578 1.063983573  
0.733496687 0.69904917 1.339620777 1 0.981814633 1.222558957  
1.237993465 1.24004238 1.63232161 1 1.291876185 1.279998549  
1.171192947 0.612347109 1.60019877 1.063883189  
YLR283W YLR283W::YLR283W::molecular\_function unknown 1 1.041668301  
1.406805807 1.212564626 1.918856252 1 1.0732057 1.235521671  
1.742086203 1.597360207 1 1.154768367 1.127084477 1.708022138  
1.420378271 1 1.157502814 0.7622828 0.822937646 1.380157687 1  
1.785626783 2.298755837 2.855938034 1.784100216 1 1.324899802  
1.514174694 0.995555315 0.902564488 1.292699314 1 1.294167196  
1.885764556 1.350545801 1.219233417 1.774109491 1 1.597628537  
1.942756888 1.139891927 1.67057815 2.41050308 1.31080911  
YJL063C YJL063C::MRPL8::Mitochondrial ribosomal protein MRPL8 (YmL8) (E.  
coli L17) 1 0.824868244 1.163046354 0.957529929 1.194340743 1  
0.792492199 1.056492836 1.349097282 0.94681863 1 0.933650006  
0.926367182 1.370585957 1.000819865 1 0.66531528 0.540972559

|             |                                                   |                         |             |             |             |             |
|-------------|---------------------------------------------------|-------------------------|-------------|-------------|-------------|-------------|
| 0.599596964 | 1.069360829                                       | 1                       | 1.662493333 | 2.164750568 | 2.192753602 |             |
| 1.434181551 | 1                                                 | 1.073243778             | 1.162831675 | 0.84422336  | 0.98844499  |             |
| 0.891638782 | 1                                                 | 1.122886089             | 1.622932025 | 1.256340447 | 0.841399717 |             |
| 1.342484868 | 1                                                 | 0.980587367             | 1.228437195 | 0.810536986 | 1.144011708 |             |
| 1.324175735 | 1.203983                                          |                         |             |             |             |             |
| YLR297W     | YLR297W::YLR297W::molecular_function              | unknown                 | 1           | 1.426696349 |             |             |
| 1.374664814 | 1.131716972                                       | 1.294061915             | 1           | 1.022107781 | 1.44182414  |             |
| 1           | 2.498875523                                       | 2.092846392             | 1.530141079 | 1.237235102 | 1           | 3.977284968 |
| 7.454031646 | 2.588234827                                       | 2.26044157              |             |             |             | 0.721856949 |
| 2.113969737 | 2.172898999                                       | 1.646186095             | 1.336943846 | 1           | 2.046291457 |             |
| 2.624970151 | 3.92241516                                        | 4.555870973             | 2.92539227  | 1           | 3.159717685 |             |
| 2.722109137 | 1.859544712                                       | 1.586274072             | 1.799752714 | 1.373854061 |             |             |
| YJL065C     | YJL065C::YJL065C::molecular_function              | unknown                 | 1           | 1.156495827 |             |             |
| 1.407425813 | 1.018444072                                       | 1.651477964             | 1           | 0.917229961 | 1.064242621 |             |
| 1.36894753  | 1.384267529                                       | 1                       | 1.174119136 | 1.054907059 | 1.608827983 |             |
| 1.34056778  | 1                                                 | 0.63326856              | 0.422826047 | 0.393512011 | 0.744142566 | 1           |
| 1.745775887 | 2.165578541                                       | 2.00214121              | 1.20264914  | 1           | 1.0331846   |             |
| 0.613719143 | 0.682132674                                       | 0.881700932             | 1           | 0.922437746 | 1.12245078  |             |
| 0.947361752 | 0.870840106                                       | 1.379913738             | 1           | 1.039803541 | 1.009997806 |             |
| 0.898289663 | 1.224756046                                       | 1.253547409             | 2.059467646 |             |             |             |
| YJL067W     | YJL067W::YJL067W::molecular_function              | unknown                 | 1           | 1.066395481 |             |             |
| 1.536397929 | 1.073907206                                       | 1.29317014              | 1           | 1.086100252 | 1.269931901 |             |
| 1.390110992 | 1.44824615                                        | 1                       | 1.298853212 | 1.651904351 | 3.177747589 |             |
| 1.227020139 | 1                                                 | 2.138264281             | 1.64341963  | 2.420863952 | 2.951194194 | 1           |
| 1.881641738 | 4.343235263                                       | 4.710703537             | 1.519561765 | 1           | 1.446477479 |             |
| 1.964536312 | 1.306992932                                       | 1.001464986             | 1.122056374 | 1           | 1.103386516 |             |
| 2.090524907 | 1.352092775                                       | 1.153284757             | 2.193524633 | 1           | 1.690100337 |             |
| 1.896834082 | 1.353100528                                       | 0.998902197             | 2.646460855 | 1.444779579 |             |             |
| YJL069C     | YJL069C::UTP18::U3                                | protein                 | 1           | 0.645275634 | 0.518357982 |             |
| 0.772969919 | 0.616229691                                       | 1                       | 0.702229056 | 0.68234155  | 0.787220577 |             |
| 0.888635584 | 1                                                 | 0.4060755               | 0.345667418 | 0.341983864 | 0.894675437 | 1           |
| 0.222590237 | 0.216284306                                       | 0.31148526              | 0.558581519 | 1           | 0.475210551 |             |
| 0.639728151 | 0.398386645                                       | 0.495314402             | 1           | 0.630544836 | 0.575777947 |             |
| 0.629962602 | 0.87800792                                        | 0.858027145             | 1           | 0.670249132 | 0.475754261 |             |
| 0.376853866 | 0.950052064                                       | 0.650367909             | 1           | 0.633959585 | 0.566240115 |             |
| 1.031696578 | 0.802951834                                       | 0.578697259             | 0.698747933 |             |             |             |
| YLR299W     | YLR299W::ECM38::ExtraCellular                     | Mutant; cik1 suppressor | 1           |             |             |             |
| 0.71059956  | 0.921660407                                       | 0.97265898              | 0.57733578  | 1           | 1.03893477  |             |
| 1.349111379 | 0.828208437                                       | 0.792201276             | 1           | 1.317544999 | 1.484249999 |             |
| 0.922438387 | 1                                                 | 2.111057657             | 0.912568012 | 2.546059585 | 1.240643157 | 1           |
| 1.946021213 | 1.903324477                                       | 2.06401757              | 1.22697737  | 1           | 1.125873977 |             |
| 1.754615689 | 1.985159966                                       | 1.130628823             | 1.031206898 | 1           | 1.126174556 |             |
| 1.162548004 | 2.365262082                                       | 1.467830362             | 0.654556532 | 1           | 1.274397703 |             |
| 1.815671851 | 0.573227272                                       | 1.413376255             | 0.945673958 |             |             |             |
| YLR301W     | YLR301W::YLR301W::molecular_function              | unknown                 | 1           | 1.271407504 |             |             |
| 1.03272147  | 0.935561218                                       | 1.458301306             | 1           | 1.078901227 | 1.027926308 |             |
| 1.302469315 | 1.382769304                                       | 1                       | 0.953367019 | 1.104970943 | 0.935360133 |             |
| 1.171873222 | 1                                                 | 0.980523208             | 0.659366843 | 1.143866854 | 1           |             |
| 1.855674368 | 2.179036347                                       | 1.866981386             | 1.540095341 | 1           | 0.953322038 |             |
| 1.198603629 | 1.071128821                                       | 0.91565105              | 1.076716994 | 1           | 1.357346137 |             |
| 1.868488685 | 1.77052082                                        | 1.228050188             | 1.689893806 | 1           | 1.18184236  |             |
| 1.560759549 | 1.200701441                                       | 1.1987853               | 1.557700699 | 1.507824531 |             |             |
| YLR303W     | YLR303W::MET17::O-Acetylhomoserine-O-Acetylserine | Sulphydralase           | 1           |             |             |             |
| 1.618256347 | 1.262755164                                       | 1.275868635             | 0.424936205 | 1           | 1.094965547 |             |
| 1.157077967 | 0.876702462                                       | 0.80984637              | 1           | 2.073863411 | 2.536333852 |             |
| 1.454618903 | 0.499877198                                       | 1                       | 0.959565389 | 1.265550272 | 0.962859943 | 1           |
| 1.399369471 | 3.239085756                                       | 1.955115295             | 0.443583549 | 1           | 1.226016962 |             |

0.843650608 1.229323737 1.669630203 0.654667466 1 2.61318515  
2.650925261 1.652354057 1.266887997 1.05797594 1 2.50485906  
2.291771939 1.496201011 0.874386231 0.82767262 1.378232177  
YJL071W YJL071W::ARG2::First step in ornithine biosynthesis pathway 1  
0.94459761 0.819338071 1.103139822 0.647519008 1 0.943263256  
1.049586242 0.940634778 0.799828147 1 1.683059754 1.03931736  
0.583409036 0.982972602 1 0.645247411 0.645557921 0.769449201 1  
0.728497947 0.777977535 0.581086506 0.509586065 1.055666439  
1.018883901 1.111358624 0.939648298 1 1.130110161 0.791591159  
0.918617832 0.922911664 0.616802379 1 1.174219519 0.938924841  
1.327384354 0.825314336 0.869152563 0.739902305  
YLR305C "YLR305C::STT4::functions in the PKC1 protein kinase pathway, in a  
pathway with STT1 and MSS4" 1 1.005640526 0.651966536 0.902972851  
0.458176271 1 1.089699864 1.042859578 0.604215682 0.481927991 1  
1.238305798 0.871345705 0.403378022 0.825839916 1 1.070200675  
0.830936199 0.645017086 1 0.559468722 0.444110225 0.392179619  
0.363413104 1 0.638086162 0.944182689 0.671961135 0.588957669 1  
0.879335802 1 1.437800337 2.860748462  
0.895452669 1.389270681  
YLR305C "YLR305C::STT4::functions in the PKC1 protein kinase pathway, in a  
pathway with STT1 and MSS4"  
1 1.009930251 0.854542379 0.998614129 1.147728485  
0.83843105 1 0.834695953 0.788460527 0.797998922 0.812933576  
0.440429436 1 0.759014911 0.921284846 0.977224508 0.544795296  
0.706382101 1.077017537  
YJL073W YJL073W::JEM1::DnaJ-like protein of the endoplasmic reticulum  
membrane 1 0.829701636 0.809335834 0.840507552 1.025982676 1  
0.801659314 0.810020621 0.962710706 0.889886187 1 0.72360356  
0.611806787 0.751244383 0.9588053 1 0.666301208 0.307636195  
0.800287941 1 1.202168961 1.762469141 1.39532643 1.052281749 1  
0.958681835 1.203782706 0.958740562 0.840846861 0.949863493 1  
0.92868073 1.031547011 0.955804188 1.230974363 1.077755012 1  
1.115577287 1.172022265 1.227545287 1.030897153 0.965222084 1.057753744  
YLR307W YLR307W::CDA1::Required for proper formation of the ascospore wall  
1.234069886  
0.221510413 0.579000884 1  
1 0.86943529 0.897753286 1.026619315 1.087659275  
1.043935605 1 0.730587237 0.790848073  
0.943635325 0.978788948 0.79331536  
YJL087C YJL087C::TRL1::tRNA ligase 1 0.811217339 0.809043299  
0.915488652 0.883782609 1 0.854776378 0.896878468 1.061400497  
0.924062469 1 0.75966358 0.710114339 0.592491486 1.003564677 1  
0.587548674 0.297861724 0.711042933 1 0.874737982 1.109680398  
0.610269024 0.689506962 1 0.800659416 0.789757406 0.78331608  
0.864200186 0.943262644 1 0.870322935 0.841071583 0.674986292  
0.868637151 1.05500344 1 1.002345831 0.908605163 1.1118918  
1.008093874 1.014800353 0.918529598  
YLR321C "YLR321C::SFH1::Involved in chromatin modeling, cell cycle  
progression" 1 0.6551576 0.717338406 0.784297608 0.657378887 1  
0.794447586 0.780054991 0.797851824 0.711728127 1 0.682865981  
0.673201285 0.561226426 0.82316946 1 0.626765809 0.543257294  
0.576674822 0.76426556 1 1.096682679 0.902154596 1.187308809  
0.815164688 1 1.091379299 1.024806311 1.017347854 0.881069823  
1.004081302 1 0.85838399 0.915103012 0.886215772 0.991384578  
1.090754848 1 0.989452569 0.918970586 1.238550779 0.499062867  
0.990270022 1.006967579

YJL089W YJL089W::SIP4::Possibly involved in Snf1p regulated transcriptional activation 1 1.508007467 1.260968665 1 1.099641798  
1.407833319 1.09679666 1 1.526293679 1.74818818 1.407101124  
1.166955108 1 1.298310574 0.400473462  
1 0.957446169 1.143971582 2.111192017 1  
0.80338867 1 1.363562054 1.816568673  
1.784791752 1.808225486  
YLR323C YLR323C::CWC24::Complexed with Cef1p 1 1.030349493  
0.903679157 0.941877038 1.012601952 1 0.733844112 0.961703015  
1.153709027 1 1.019585543 0.84636691 0.935066369 1.498290338 1  
0.984775206 1.021868084 0.425251255  
0.493558832 1 0.893251823 0.998824832 1.000001605 0.902560505  
1.100571605 1 1.074860947 1.034769196 0.939587342 1.365084863  
1.49720904 1 1.007070742 1.192473612 0.272502627 1.124722818  
0.772300393  
YJL091C YJL091C::YJL091C::molecular\_function unknown 1 1.459318817  
0.971479921 0.992225024 1.035745358 1 1.049935321 1.061177749  
1.068756817 0.775523379 1 1.155057918 0.821142637 0.811641942  
0.967571959 1.151295681 0.815662365 0.88116702 1.112616912 1  
0.970620943 0.516905587 1.040711407 1 1.169312035 1.062891479  
1.017683454 1.034817905 1.074827809 1 0.860989225 0.816809519  
0.930748392 0.685114324 0.738395429 1 0.928563237 0.860041806  
0.943879485 0.949940425  
YLR325C YLR325C::RPL38::Homology to rat L38 1 1.096407331 0.969708724  
0.657358573 1.143978242 1 0.807204416 0.799960594 0.858619948 1  
0.809267501 0.847953189 0.749455125 0.716552995 1 0.635871382  
0.299913487 0.213002123 0.612884235 1 1.474360146 0.774656725  
0.691474592 0.964937961 1 1.305036439 0.977919437 0.848907599  
1.176157951 1.487736447 1 0.971790874 1.881282627 0.94498086  
0.678372731 1.618736259 1 1.119605066 1.592110189 0.937787715  
1.469877996 1.328127844 1.767884903  
YJL093C YJL093C::TOK1::Target Of K1 Killer Toxin 1 1.011929627  
0.744215849 0.937768815 0.636758297 1 0.954268381 1.033820788  
0.847622251 0.790739077 1 1.160598884 0.87332856 0.737724019  
0.931933478 1 1.082465774 0.706772189 0.988477856 0.640425465 1  
1.034278443 0.777683466 0.753700941 0.645714437 1 1.088733327  
0.94623583 0.783952398 1.239226962 1.030996907 1 0.886455205  
0.656574127 0.959722559 0.67111722 0.592099266 1 0.955108316  
0.556709638 0.868270398 0.691495598 0.975537955 0.698747933  
YLR327C YLR327C::YLR327C::molecular\_function unknown 1 1.112355878  
1.855821922 1.35044731 1.589674172 1 1.02848224 1.715875852  
1.689580619 1.30789406 1 1.783559478 3.027609668 5.904228105  
1.416215516 1 11.97613645 5.872970774 6.718601829 7.87842326 1  
9.196597164 9.281915819 11.60126734 4.658414024 1 1.990355031  
2.934406005 1.122833913 1.33127494 1 4.631280344 5.097433264  
10.60204497 4.322736796 4.140248486 1 3.934903367 3.335329214  
2.071559648 1.523754103 4.731905076 1.630411878  
YLR329W "YLR329W::REC102::Dispensable for mitotic recombination, DNA damage repair, axial elements & meiotic chromosome condensation; required for wild-type level of chromosome pairing seen by in situ hybridization, tripartite synaptonemal complexes"  
1.122557578 0.907840921 1  
1.667900851 1 1.684855928 1 0.871408363  
0.891466727 0.693376498 0.946846225 0.833185527  
1.020803215 1 1.263037127 0.501732564  
YJL095W YJL095W::BCK1::bypass requirement for protein kinase C homolog 1  
0.932229121 0.944010717 1.262602145 0.981423816 1 1.233087608

|             |                                                                                                                                                                         |             |             |             |             |
|-------------|-------------------------------------------------------------------------------------------------------------------------------------------------------------------------|-------------|-------------|-------------|-------------|
| 1.32574618  | 1.003165745                                                                                                                                                             | 0.934380569 | 1           | 1.183399742 | 1.024496112 |
| 0.7530215   | 1.228513836                                                                                                                                                             | 1           | 0.959875434 | 0.63245007  | 1.009464457 |
| 0.85394187  | 1                                                                                                                                                                       | 0.833548377 | 1.064764032 | 0.800879121 | 1.007711398 |
| 0.984909646 | 0.965686813                                                                                                                                                             | 1.12138106  | 0.922283662 | 0.894725955 | 1           |
| 0.989081483 | 0.87942071                                                                                                                                                              | 0.937251333 | 1.045672399 | 0.675040538 | 1           |
| 0.725764991 | 0.872052082                                                                                                                                                             | 1.084857827 | 0.679899144 | 1.010853151 | 1.134808707 |
| YJL097W     | YJL097W::YJL097W::molecular_function                                                                                                                                    | unknown     | 1           | 1.411002546 |             |
| 1.217336458 | 0.943339336                                                                                                                                                             | 1.352529571 | 1           | 0.965782684 | 0.898890442 |
| 1.437654982 | 1.284577516                                                                                                                                                             | 1           | 1.011605058 | 0.8729056   | 1.195409216 |
| 1.220902321 | 1                                                                                                                                                                       | 0.767260105 | 0.740839228 | 0.702169738 | 0.910849225 |
| 1.121246331 | 1.190525892                                                                                                                                                             | 1.170291568 | 1.066982593 | 1           | 1.258403861 |
| 1.245822882 | 1.328265652                                                                                                                                                             | 1.196711085 | 0.925738761 | 1           | 0.919746509 |
| 1.37577563  | 1.495074258                                                                                                                                                             | 0.984878006 | 1.272945202 | 1           | 0.908017011 |
| 1.132611181 | 1.007839371                                                                                                                                                             | 1.124830896 | 0.952352875 | 1.165455518 |             |
| YJL111W     | YJL111W::CCT7::Required for assembly of microtubules and actin in vivo                                                                                                  | 1           | 0.873497531 | 0.842195961 | 0.889019911 |
| 0.851252714 | 0.88587279                                                                                                                                                              | 0.772016609 | 1           | 0.848035491 | 0.776555785 |
| 0.555275009 | 0.771826416                                                                                                                                                             | 1           | 0.679036099 | 0.535651848 | 0.680186135 |
| 0.785752516 | 1                                                                                                                                                                       | 0.999315534 | 0.610605282 | 0.75083902  | 0.896723996 |
| 0.915660377 | 1.001388931                                                                                                                                                             | 1.070650445 | 0.949746915 | 0.936420848 | 1           |
| 0.961924403 | 1.026148511                                                                                                                                                             | 0.837717217 | 0.632753109 | 0.722453841 | 1           |
| 0.919437724 | 0.923501717                                                                                                                                                             | 0.936655411 | 0.859119245 | 0.780886599 | 0.860738375 |
| YJL113W     | YJL113W                                                                                                                                                                 | 1           | 1.327951276 | 1.18503258  | 1.105213045 |
| 1.251251186 | 1.267925672                                                                                                                                                             | 1.140059168 | 1.047011353 | 1           | 1.211691483 |
| 1.039215114 | 1.112116332                                                                                                                                                             | 1.097615878 | 1           | 1.057293411 | 0.891938529 |
| 0.917747802 | 0.931077404                                                                                                                                                             | 1           | 1.456647734 | 1.117867351 | 1.245489261 |
| 1.16980722  | 1.066296966                                                                                                                                                             | 1.282494445 | 1.038779944 | 1.066328944 | 1           |
| 0.834497729 | 0.802749419                                                                                                                                                             | 0.765971439 | 0.769435614 | 0.757369114 | 1           |
| 0.923414492 | 0.875500092                                                                                                                                                             | 1.021968754 | 0.999138078 | 0.92591565  |             |
| YLR331C     | YLR331C::JIP3::Jumonji Interacting Protein                                                                                                                              | 1           | 0.810866813 |             |             |
| 0.49671454  | 0.714155796                                                                                                                                                             | 0.538439729 | 1           | 0.637060786 | 0.644101436 |
| 0.46829305  | 0.542062092                                                                                                                                                             | 1           | 0.793173704 | 0.518046041 | 0.453229354 |
| 0.670633582 | 1                                                                                                                                                                       | 0.626850128 | 0.61439323  | 0.618634116 | 0.614415202 |
| 0.74205826  | 0.772041548                                                                                                                                                             | 0.57451633  | 1           | 0.966104839 | 0.948809865 |
| 1.165656279 | 0.813345774                                                                                                                                                             | 1           | 0.622610498 | 0.472632565 | 0.555301459 |
| 0.694548359 | 0.362866393                                                                                                                                                             | 1           | 0.674588581 | 0.703517125 | 0.773207732 |
| 0.253007452 | 0.598403046                                                                                                                                                             | 0.956181415 |             |             |             |
| YLR345W     | YLR345W::YLR345W::molecular_function                                                                                                                                    | unknown     | 0.699371039 |             |             |
| 1.05226786  | 0.950424127                                                                                                                                                             | 0.751848199 | 0.981900395 | 1.059938601 |             |
| 0.972535356 | 0.672791097                                                                                                                                                             | 1.021170307 | 1.486092355 | 1.305288203 |             |
| 0.93689249  | 1                                                                                                                                                                       | 2.545995096 | 2.416016774 | 2.506871055 | 1.773830532 |
| 2.811996734 | 1.689717118                                                                                                                                                             | 2.644777383 | 1.602678238 | 1           | 1.595239545 |
| 1.724869775 | 1.129665751                                                                                                                                                             | 1.374980155 | 1           | 1.225287948 | 1.064122269 |
| 2.174744828 | 1.61794008                                                                                                                                                              | 0.878039286 | 1           | 1.340707707 | 1.128163864 |
| 1.232665108 | 0.61917454                                                                                                                                                              | 1.224306844 | 0.651464271 |             |             |
| YLR347C     | YLR347C::KAP95::protein involved in nuclear import; required for the docking of import substrate to the nuclear membrane/pore; identified as an rnal-1 synthetic lethal | 1           | 0.741028142 | 0.477117332 | 0.87809974  |
| 0.790857285 | 0.80346114                                                                                                                                                              | 0.524316966 | 0.578967352 | 1           | 0.842095123 |
| 0.650153405 | 0.368793469                                                                                                                                                             | 0.787977821 | 1           | 0.4137354   | 0.374863425 |
| 0.431444303 | 0.433891066                                                                                                                                                             | 1           | 0.482936718 | 0.350095014 | 0.539939244 |
| 0.872618917 | 0.718196213                                                                                                                                                             | 1.071057345 | 1.297329046 | 0.920727032 | 1           |
| 0.960345534 | 0.484790449                                                                                                                                                             | 0.666200429 | 0.731597415 | 0.289315502 | 1           |
| 0.792513505 | 0.619946779                                                                                                                                                             | 0.860816087 | 0.481423596 | 0.522058777 | 0.586668095 |
| YJL115W     | YJL115W::ASF1::anti-silencing protein that causes depression of silent loci when overexpressed                                                                          | 1           | 0.795763013 | 1.160700251 | 0.913805508 |
| 0.931567635 | 1                                                                                                                                                                       | 0.972408424 | 1.030753701 | 1.123913981 | 1.147607393 |

|             |                                                                            |             |             |             |             |
|-------------|----------------------------------------------------------------------------|-------------|-------------|-------------|-------------|
| 0.783712629 | 0.932977314                                                                | 1.26566437  | 1.180806815 | 1           | 0.531184362 |
| 0.326172374 | 0.526949113                                                                | 1.336033474 | 1           | 1.055389915 | 2.175407784 |
| 1.397885086 | 0.792216185                                                                | 1           | 0.915456123 | 1.042039939 | 0.896191937 |
| 0.784196408 | 0.985675973                                                                | 1           | 0.937403609 | 0.993409881 | 1.005532984 |
| 1.472502711 | 1                                                                          | 0.925579986 | 1.088457893 | 1.226056242 | 0.887261385 |
| 1.595825916 | 0.944798293                                                                |             |             |             |             |
| YLR349W     | YLR349W::YLR349W::molecular_function                                       | unknown     | 1           | 1.023269154 |             |
| 0.952002498 | 0.970883157                                                                | 0.559335313 | 1           | 0.889902836 | 1.055983564 |
| 1.170555983 | 1                                                                          | 1.012582288 | 1.265668217 | 1.144072328 | 1.312498031 |
| 0.501216706 | 0.282628206                                                                | 0.570697762 | 1.412776009 | 1           | 1.328871609 |
| 1.353314556 | 1                                                                          | 0.807495781 | 1.000950523 | 0.971737941 |             |
| 0.904776611 | 1                                                                          | 1.126800068 | 1.172548914 | 1.330412457 | 1.206490888 |
| 1.455687727 | 1                                                                          | 0.759363714 | 1.164777554 | 0.805448616 | 0.777976657 |
| 0.610982665 |                                                                            |             |             |             |             |
| YJL117W     | YJL117W::PHO86::May collaborate with Pho87p and Pho84p in phosphate uptake |             |             |             |             |
| 1           | 0.962637836                                                                | 0.788325599 | 0.730509038 | 0.995692217 | 1           |
| 0.759223622 | 0.737474796                                                                | 0.963951674 | 0.908145258 | 1           | 0.790938411 |
| 0.78865412  | 0.809975495                                                                | 0.877006658 | 1           | 1.124204967 | 0.773899601 |
| 0.951845781 | 1.343536337                                                                | 1           | 1.254131764 | 0.891189341 | 1.257681019 |
| 1.080759686 | 1                                                                          | 1.163997004 | 1.122267203 | 1.042455442 | 1.030004639 |
| 0.877691594 | 1                                                                          | 0.959761127 | 1.043530121 | 0.990507249 | 0.860190863 |
| 1.021433303 | 1                                                                          | 1.249580105 | 1.254310248 | 1.131206931 | 1.028259573 |
| 0.850138814 | 1.296799097                                                                |             |             |             |             |
| YLR351C     | "YLR351C::NIT3::Nit protein, nitrilase superfamily member"                 |             |             |             | 1           |
| 0.976374904 | 0.943266445                                                                | 0.860332842 | 0.998391678 | 1           | 0.857716341 |
| 0.792232086 | 1.172610968                                                                | 1.125711768 | 1           | 0.943129339 | 1.114922883 |
| 1.225514455 | 1.254039107                                                                | 1           | 0.936532311 | 1.39824269  | 1           |
| 1.640738625 | 1.676361885                                                                | 1.746660309 | 1.512652655 | 1           | 1.262179134 |
| 0.914049441 | 1.062642959                                                                | 1.082128132 | 1.089569466 | 1           | 1.094148068 |
| 1.489100136 | 1.582879128                                                                | 1.241570667 | 1.325117011 | 1           | 1.100608648 |
| 1.640335476 | 1.119499306                                                                | 1.204882198 | 0.964891131 | 1.239007927 |             |
| YJL119C     | YJL119C::YJL119C::molecular_function                                       | unknown     | 1           | 1.185568397 |             |
| 1.091749699 | 0.887602029                                                                | 0.950842673 | 1           | 1.151788609 | 1.217910317 |
| 1.177407971 | 1                                                                          | 1.165929753 | 1.115067509 | 1.119041186 | 1.209907805 |
| 0.522507796 | 0.438183273                                                                | 0.885581591 | 0.734762998 | 1           | 1.375481298 |
| 3.474918545 | 1.660227111                                                                | 0.463346073 | 1           | 1.499378401 |             |
| 1.135479973 | 1.046665136                                                                | 1           | 0.867732948 | 0.96656373  | 1           |
| 1.138320274 | 0.916838696                                                                | 1.375921262 | 1.310576007 | 1.320441006 |             |
| YLR353W     | YLR353W::BUD8::involved in bud site selection                              |             |             |             | 1           |
| 0.836468684 | 0.854355196                                                                | 1           | 0.908008882 | 1.022260242 | 0.765759293 |
| 0.735242466 | 1                                                                          | 1.244422283 | 1.050858822 | 0.636962896 | 1.105102153 |
| 0.711690135 | 0.262894225                                                                | 0.7831136   | 1           | 0.793831919 | 0.500455187 |
| 0.600117921 | 1                                                                          | 0.937454441 | 0.665649271 | 0.851228921 | 0.971711315 |
| 0.936166752 | 1                                                                          | 0.91252658  | 0.892021855 | 0.693837091 | 0.916996088 |
| 0.664441757 | 1                                                                          | 0.627971603 | 0.763483593 | 0.899936457 | 0.663200584 |
| 0.741720136 | 0.619066183                                                                |             |             |             |             |
| YJL121C     | YJL121C::RPE1::D-ribulose-5-Phosphate 3-epimerase                          |             |             |             | 1           |
| 1.111192001 | 0.926329078                                                                | 0.34683166  | 0.390254247 | 1           | 0.800303212 |
| 0.751643237 | 0.494136334                                                                | 0.507252108 | 1           | 0.98283812  | 0.850246094 |
| 0.853448502 | 0.428878863                                                                | 1           | 1.052347363 | 0.496045256 | 0.542722961 |
| 0.821169659 | 1                                                                          | 1.077728949 | 0.871500461 | 0.74607298  | 0.626787078 |
| 1.030232833 | 0.879955497                                                                | 0.776059623 | 1.150531339 | 0.847291803 | 1           |
| 0.791357368 | 0.651803097                                                                | 0.453531493 | 0.739243118 | 1.052389343 | 1           |
| 0.722890898 | 0.605071728                                                                | 0.620131483 | 0.763063851 | 0.740661809 | 0.86161404  |
| YLR355C     | YLR355C::ILV5::branched-chain amino acid biosynthesis                      |             |             |             | 1           |
| 1.138413243 | 0.615275421                                                                | 0.86108391  | 0.491291508 | 1           | 1.113018826 |
| 0.798687324 | 0.60303473                                                                 | 0.651676311 | 1           | 1.213716613 | 0.638407651 |

|             |                                                                                                                                                |             |             |             |             |             |
|-------------|------------------------------------------------------------------------------------------------------------------------------------------------|-------------|-------------|-------------|-------------|-------------|
| 0.495744314 | 0.779000634                                                                                                                                    | 1           | 0.88507369  | 1.10185369  | 0.744185043 | 1           |
| 0.499495305 | 0.20257417                                                                                                                                     |             | 0.744236793 | 1           | 1.459661452 | 1.159530663 |
| 1.387046446 | 1.335966802                                                                                                                                    | 1.105020799 | 1           | 0.949187237 | 0.635312523 |             |
| 0.466527119 | 0.376919413                                                                                                                                    | 0.516152342 | 1           | 1.005790756 | 0.439276748 |             |
| 1.061176181 | 0.653043474                                                                                                                                    | 0.596579707 | 0.986828225 |             |             |             |
| YJL135W     | YJL135W::YJL135W::molecular_function                                                                                                           | unknown     | 1           |             |             |             |
| 1           | 1.462427402                                                                                                                                    |             | 1           | 1.333989607 |             |             |
| 0.248501162 | 0.418288404                                                                                                                                    | 0.344289912 | 0.679397689 | 1           | 1.783688681 |             |
| 4.553124526 | 2.195320372                                                                                                                                    | 0.692124345 | 1           | 0.994853633 |             |             |
| 1.297995386 | 1.026404066                                                                                                                                    | 1           | 0.802592579 |             | 1           |             |
| 0.854935768 | 0.663612537                                                                                                                                    | 1.264693507 | 0.969967794 |             |             |             |
| YLR369W     | YLR369W::SSQ1::Stress                                                                                                                          | seventy Q   | 1           | 1.303485072 | 1.221110031 |             |
| 0.842969344 | 1                                                                                                                                              | 1.158002389 | 1.298969222 | 1           | 1.348601556 |             |
| 1.384900675 | 1.028517122                                                                                                                                    | 1           | 1.414718794 | 0.740222396 | 1.113394608 |             |
|             |                                                                                                                                                | 1           | 0.867164862 | 0.873726987 | 0.807974399 |             |
| 0.762800817 | 0.865411866                                                                                                                                    | 1           | 0.998528861 | 1.008195891 | 0.928348887 |             |
| 0.978540323 | 0.507706138                                                                                                                                    | 1           | 0.875345111 | 0.948053806 | 1.010683578 |             |
| 0.765028601 | 0.802951899                                                                                                                                    | 0.603304945 |             |             |             |             |
| YLR371W     | YLR371W::ROM2::Gdp-GTP Exchange Protein (GEP) for the Rho1p Small GTP-binding Protein; high copy suppressor of cik1 and kar3 deletion mutants. |             |             |             |             |             |
| 1.067525809 | 0.857529978                                                                                                                                    | 1.165108194 | 0.841913354 | 1.040015385 |             |             |
| 0.975363229 | 0.895686479                                                                                                                                    | 0.795454716 | 1.080246305 | 1.146565219 |             |             |
| 0.904470071 | 1.162059978                                                                                                                                    | 1           | 1.216826617 | 1.672442327 | 0.907168085 | 1           |
| 1.173006106 | 1.20249678                                                                                                                                     | 1.470341677 | 1           | 1.124987664 | 0.908322224 |             |
| 1.366521152 | 1.281647269                                                                                                                                    | 0.986694629 | 1           | 1.075046024 | 0.92044832  |             |
| 0.859718662 | 0.779025399                                                                                                                                    | 0.583198053 | 1           | 0.76416191  | 0.761933313 |             |
| 0.974078315 | 0.856323073                                                                                                                                    | 0.727073578 | 0.866867768 |             |             |             |
| YJL137C     | YJL137C::GLG2::self-glucosylating initiator of glycogen synthesis; similar to mammalian glycogenin                                             | 1           | 1.07265714  | 1.250855252 | 1.107937114 |             |
| 1.313990275 | 1                                                                                                                                              | 1.100371961 | 1.126092915 | 1.151342284 | 1.296377537 | 1           |
| 1.190615516 | 1.214530222                                                                                                                                    | 1.444133018 | 1.176213531 | 1           | 1.197200383 |             |
| 0.607802623 | 1.395305455                                                                                                                                    | 1.501851382 | 1           | 2.13200263  | 2.781352479 |             |
| 2.324418309 | 1.16652705                                                                                                                                     | 1           | 1.198523283 | 1.311591319 | 1.146306296 |             |
| 1.0415866   | 0.80486777                                                                                                                                     | 1           | 1.011048541 | 1.113097253 | 1.007899017 |             |
| 1.379349017 | 1                                                                                                                                              | 1.26028237  | 1.311897183 | 1.358134238 | 1.797514024 |             |
| 0.915902707 |                                                                                                                                                |             |             |             |             |             |
| YLR373C     | YLR373C::VID22::Vacuole import and degradation                                                                                                 | 1           | 0.855303424 |             |             |             |
| 0.853402939 | 0.861312188                                                                                                                                    | 0.940856525 | 1           | 0.806913647 | 0.857581269 |             |
| 0.92358601  | 0.819789562                                                                                                                                    | 1           | 0.859802315 | 0.714301515 | 0.84277453  |             |
| 0.852619405 | 1                                                                                                                                              | 0.998105859 | 0.909870592 | 0.892211057 | 1           |             |
| 1.32909097  | 1.554771704                                                                                                                                    | 1.417865217 | 0.933776721 | 1           | 1.132454602 |             |
| 1.169681497 | 1.056781821                                                                                                                                    | 0.971835291 | 1.083294496 | 1           | 0.818019868 |             |
| 1.116508914 | 0.727930591                                                                                                                                    | 0.81517347  | 1.043949838 | 1           | 0.729343995 |             |
| 1.376284451 | 1.088067843                                                                                                                                    | 1.210838915 | 1.046696949 | 1.242510482 |             |             |
| YJL139C     | YJL139C::YUR1::Probable glycosyltransferase of KRE2/KTR1/YUR1 family; located in the Golgi                                                     | 1           | 0.795722273 | 0.835771538 | 0.894784204 |             |
| 0.803455599 | 1                                                                                                                                              | 0.791361097 | 0.855577085 | 0.976735678 | 0.846392287 | 1           |
| 0.888755898 | 0.849025629                                                                                                                                    | 0.672874094 | 1.036815694 | 1           | 0.691261054 |             |
| 0.622847818 | 0.722778355                                                                                                                                    | 0.74314203  | 1           | 1.008615344 | 1.350056522 |             |
| 0.883008023 | 1                                                                                                                                              | 0.817211997 | 0.936281642 | 0.94895784  | 0.970194305 |             |
| 0.886047565 | 1                                                                                                                                              | 1.053621637 | 1.010659354 | 1.174987386 | 1.155016951 |             |
| 0.867638287 | 1                                                                                                                                              | 0.925358582 | 0.827350151 | 0.994345089 | 0.71462913  |             |
| 1.111513543 | 1.360719714                                                                                                                                    |             |             |             |             |             |
| YJL141C     | YJL141C::YAK1::Serine-threonine protein kinase                                                                                                 | 1           | 0.938861571 |             |             |             |
| 0.913462776 | 0.814262744                                                                                                                                    | 0.680098707 | 1           | 1.067980478 | 1.033305024 |             |
| 0.772109545 | 0.609706925                                                                                                                                    | 1           | 1.323387152 | 1.284298478 | 0.965808828 |             |
| 0.807633673 | 1                                                                                                                                              | 1.210393272 | 1.247644516 | 1.286595405 | 0.866445697 | 1           |

|         |                                                                                          |             |             |             |             |             |
|---------|------------------------------------------------------------------------------------------|-------------|-------------|-------------|-------------|-------------|
|         | 1.551618702                                                                              | 1.422715021 | 1.435342938 | 1.301802679 | 1           | 1.086935155 |
|         | 1.140576777                                                                              | 0.877419069 | 1.022234756 | 1.049025945 | 1           | 1.073256224 |
|         | 0.826114018                                                                              | 1.402391567 | 0.985014365 | 1.095258241 | 1           | 1.115577287 |
|         | 0.792524786                                                                              | 0.973570416 | 0.759175068 | 1.343518756 | 0.584041204 |             |
| YJL143W | YJL143W::TIM17::Mitochondrial inner membrane protein involved in protein import          |             |             |             |             |             |
|         | 1                                                                                        | 1.328034385 | 1.126218783 | 1.092702317 | 1.251426058 | 1           |
|         | 0.951968369                                                                              | 1.103353018 | 1.259973911 | 1.144435104 | 1           | 1.242804533 |
|         | 0.899676027                                                                              | 1.274047804 | 0.900434686 | 1           | 0.959668844 | 0.658545714 |
|         | 0.69587421                                                                               | 0.861896707 | 1           | 1.692801207 | 1.179793328 | 1.195787097 |
|         | 1.065341696                                                                              | 1           | 1.243334532 | 1.191664815 | 1.185579728 | 1.328439243 |
|         | 0.913631803                                                                              | 1           | 0.98657882  | 1.186250672 | 0.848805971 | 0.545208834 |
|         | 0.903958096                                                                              | 1           | 1.116916959 | 1.102971971 | 0.696747967 | 1.011395492 |
|         | 1.055747954                                                                              | 1.31080911  |             |             |             |             |
| YJL145W | YJL145W::SFH5::putative phosphatidylinositol transfer protein                            |             |             |             |             |             |
|         | 0.814151025                                                                              | 1.071792921 | 0.734140632 | 1.118004074 | 1           | 0.916530793 |
|         | 0.759980444                                                                              | 1.078185383 | 1.139600904 | 1           | 1.112250207 | 1.076125353 |
|         | 0.790066631                                                                              | 1.066131493 | 1           | 0.649989181 | 0.484548431 | 0.324246882 |
|         | 0.673197797                                                                              | 1           | 1.405739521 | 1.339430153 | 1.023894003 | 1.117241834 |
|         | 1.111263251                                                                              | 1.562359292 | 1.361050617 | 0.844797053 | 0.924036557 | 1           |
|         | 1.475436693                                                                              | 1.941610304 | 2.066074471 | 1.709823732 | 1.058630355 | 1           |
|         | 1.100490063                                                                              | 1.329293345 | 1.195294418 | 0.825439169 | 0.726609648 | 1.774014244 |
| YLR375W | YLR375W::STP3::Involved in pre-tRNA splicing and in uptake of branched-chain amino acids |             |             |             |             |             |
|         | 1                                                                                        | 1.184793301 | 0.984162436 | 0.767387355 |             |             |
|         | 0.715407631                                                                              | 1           | 0.882324214 | 0.853740887 | 0.879875111 | 0.938012406 |
|         | 1.260032245                                                                              | 1.069093827 | 1.220112571 | 0.853954896 | 1           | 1.342650306 |
|         | 1.282130936                                                                              | 0.992387391 | 1.124975783 | 1           | 1.383979402 | 1.419481596 |
|         | 1.260539552                                                                              | 1.266513524 | 1           | 0.976209563 |             | 1.020356214 |
|         | 1.187333526                                                                              | 1           | 0.75109421  | 0.81776685  | 0.745112158 | 0.626267468 |
|         | 0.932064567                                                                              | 1           | 0.81504526  | 0.937136312 | 0.949236207 | 0.442281308 |
|         | 1.025305603                                                                              |             |             |             |             |             |
| YLR377C | "YLR377C::FBP1::fructose-1,6-bisphosphatase"                                             |             |             |             |             |             |
|         | 0.966856456                                                                              | 1.158399271 | 0.916314974 |             | 1.357600088 |             |
|         | 1.294782117                                                                              |             | 1.484132928 | 1.28775973  | 1.073950936 | 1           |
|         | 1.038915085                                                                              |             | 1.762376462 |             | 0.238654233 |             |
|         | 0.300048976                                                                              |             | 0.910726253 | 0.757490036 | 0.840591249 | 0.744618246 |
|         | 0.694463281                                                                              | 0.979705939 | 0.909461692 | 0.765754757 | 1           | 0.507079541 |
|         | 0.637901846                                                                              | 0.852012563 | 0.278408443 | 0.630204359 |             |             |
| YLR379W | YLR379W::YLR379W::molecular_function unknown                                             |             |             |             |             |             |
|         | 1.167288423                                                                              | 1.336184529 | 0.392566562 | 1.566682068 |             | 0.720789159 |
|         | 0.769435136                                                                              |             | 2.297934614 | 1.732540458 | 0.854221753 | 1.035770331 |
|         | 0.498126915                                                                              | 0.322454272 | 0.56551314  | 0.396167084 | 1           | 0.281514023 |
|         | 0.265348796                                                                              | 0.170214679 | 0.246507011 | 1           | 1.027426518 | 0.544311028 |
|         | 0.957816849                                                                              | 1.534070883 | 0.643116435 | 1           | 0.551806849 | 0.322019301 |
|         | 0.481001213                                                                              | 0.637191038 | 0.100374884 | 1           | 0.586187819 | 0.373804735 |
|         | 0.680890413                                                                              | 0.249885051 | 0.539135422 | 0.50348379  |             |             |
| YJL159W | "YJL159W::HSP150::Heat shock protein, secretory glycoprotein"                            |             |             |             |             |             |
|         | 1.034774455                                                                              | 0.79676714  | 0.582330496 | 0.343680712 | 1           | 1.145811529 |
|         | 1.399627301                                                                              | 0.397135077 | 0.526281572 | 1           | 1.446450316 | 1.823352269 |
|         | 1.579042288                                                                              | 0.408534487 | 1           | 1.122761269 | 1.585177857 | 2.103010539 |
|         | 0.712795044                                                                              | 1           | 0.490090867 |             | 1           | 1.152640772 |
|         | 0.999144778                                                                              | 1.336351949 | 1.128533485 | 0.960988941 | 1           | 0.753265835 |
|         | 0.709538334                                                                              | 0.563884699 | 0.587068788 | 0.765208431 | 1           | 0.645295214 |
|         | 0.643250718                                                                              | 0.532499346 | 0.565173496 | 0.58122099  | 1.042868171 |             |
| YLR393W | YLR393W::ATP10::essential for assembly of a functional mitochondrial ATPase complex      |             |             |             |             |             |
|         | 1                                                                                        | 0.824061579 | 1.355004052 | 0.789000046 | 1           |             |
|         | 1.527891791                                                                              |             | 0.775349855 | 1           | 1.369927312 | 1.342225591 |
|         | 1.277409561                                                                              | 1           | 0.74929708  |             | 1.076986443 | 0.629579319 |



|             |                                                                                                        |             |             |             |             |
|-------------|--------------------------------------------------------------------------------------------------------|-------------|-------------|-------------|-------------|
| 1.001927055 | 1.128722521                                                                                            | 0.928612281 | 1           | 0.871424228 | 1.015935948 |
| 1.244525773 | 1.060393687                                                                                            | 1.369934364 | 1           | 1.084651471 | 0.661138933 |
| 1.05353934  | 0.973397311                                                                                            | 1           | 0.818892014 | 0.57504323  | 0.645414698 |
| 0.288521643 | 0.75073656                                                                                             |             |             |             |             |
| YJL161W     | YJL161W::YJL161W::molecular_function                                                                   | unknown     | 1           | 1.519230161 |             |
| 2.729880163 | 1.997375542                                                                                            | 3.019765472 | 1           | 1.664802922 | 2.619465285 |
| 3.428270728 | 2.954878717                                                                                            | 1           | 1.642993926 | 3.775612458 | 8.184781957 |
| 2.533049051 | 1                                                                                                      | 2.433653235 | 3.165844261 | 4.035743854 | 3.753132212 |
| 3.179740801 | 6.889094351                                                                                            | 9.631809188 | 4.546106685 |             | 1.679731869 |
| 1.275031376 | 1.059257298                                                                                            | 1           | 0.788441957 |             | 2.356751205 |
| 1           |                                                                                                        | 1.035701613 | 5.241372898 | 1.734611097 |             |
| YLR395C     | YLR395C::COX8::Cytochrome-c oxidase chain VIII                                                         |             |             | 0.965328983 |             |
| 0.999882228 | 0.684305339                                                                                            | 0.945684074 |             | 0.789394668 | 0.913853843 |
| 1.075883729 | 1.205572286                                                                                            |             | 0.693238386 | 0.698093248 | 1.277242702 |
| 0.607952161 | 1                                                                                                      | 0.917279623 | 0.584252135 | 0.68485664  | 1.835456606 |
| 1.947897442 | 1.761704652                                                                                            |             | 2.674135035 | 1           | 0.837571607 |
| 0.338401599 | 0.83944865                                                                                             | 0.928700468 | 1           | 0.548121463 | 0.360434062 |
| 0.177224896 | 0.309401432                                                                                            | 1.340084294 | 1           | 0.583792051 | 0.5016549   |
| 0.596994637 | 1.137204164                                                                                            | 1.986127296 | 1.320441006 |             |             |
| YJL163C     | YJL163C::YJL163C::molecular_function                                                                   | unknown     | 1           | 0.895411991 |             |
| 0.854350303 | 0.95786051                                                                                             | 0.546029336 | 1           | 1.042325861 | 1.133605089 |
| 0.840565099 | 0.821908788                                                                                            | 1           | 1.263800596 | 1.446507755 | 1.470731685 |
| 0.879500327 | 1                                                                                                      | 0.919106972 | 1.294344535 | 1.877111274 | 0.933346064 |
| 0.896710765 |                                                                                                        | 0.863669106 | 0.625897052 | 1           | 1.287247122 |
| 1.211015162 | 2.54230306                                                                                             | 1.768131804 | 1           | 0.666421331 | 0.387939627 |
| 0.637536638 | 1.034093768                                                                                            | 0.211537201 | 1           | 0.492917623 | 0.317922333 |
| 0.463385273 | 0.23446629                                                                                             | 0.428621752 | 0.407165163 |             |             |
| YLR397C     | YLR397C::AFG2::ATPase family gene                                                                      |             |             | 1.210355097 | 0.883722794 |
| 0.656888203 |                                                                                                        | 1.225256693 | 1.195039681 |             | 0.985025691 |
| 1.100742001 | 0.804922613                                                                                            | 0.502483388 | 1.375479517 | 1           | 0.664785526 |
| 0.544812442 | 0.40674398                                                                                             | 1           |             | 0.226078323 | 0.446124371 |
| 0.688156528 | 0.566903436                                                                                            |             | 0.98925195  | 0.772511467 | 1           |
| 0.436325972 | 0.653764358                                                                                            | 0.948033228 | 0.417579927 | 1           | 0.536961357 |
| 0.693201359 | 0.395149924                                                                                            | 0.329759318 | 1.068261305 |             |             |
| YJL165C     | "YJL165C::HAL5::Protein kinase homolog, mutant is salt and pH sensitive"                               |             |             | 1           |             |
| 0.939532099 | 1.046109402                                                                                            | 0.823677529 | 0.749227796 | 1           | 0.898767951 |
| 0.979571312 | 0.836449287                                                                                            | 1.022067969 | 1           | 0.988885924 | 0.957908433 |
| 0.766082789 |                                                                                                        | 0.733425204 | 0.672049631 | 0.802040805 | 0.502255921 |
| 1.149664892 | 1.128869955                                                                                            | 1.162059264 | 1.329742064 | 1.165255934 | 1           |
| 1.093602715 | 0.72051194                                                                                             | 0.833476194 | 0.977745752 | 0.514533314 | 1           |
| 0.855285206 | 0.662738744                                                                                            | 0.908515165 | 0.738368542 | 0.658317598 | 0.695245482 |
| YLR399C     | "YLR399C::BDF1::Required for sporulation, possible component of chromatin; affects synthesis of snRNA" |             |             | 1           |             |
| 0.430610135 | 1                                                                                                      | 0.748946888 | 0.738677843 | 0.617325675 | 0.526231817 |
| 0.625999903 | 0.800406464                                                                                            | 0.50621843  | 0.693379528 | 1           |             |
| 1.380274754 | 0.867432431                                                                                            | 1           | 0.830293821 | 0.525575296 | 0.625265428 |
| 0.772013565 | 1                                                                                                      | 0.943335292 | 0.907615639 | 1.265353574 | 1.16435536  |
| 1.393132791 | 1                                                                                                      | 0.768994108 | 0.512464502 | 0.710182164 | 0.723760956 |
| 0.489890204 | 1                                                                                                      | 1.01719422  | 0.973463699 | 1.604432764 | 0.858844898 |
| 1.179810512 | 0.689116088                                                                                            |             |             |             |             |
| YLR401C     | YLR401C::YLR401C::molecular_function                                                                   | unknown     | 1           | 0.648062802 |             |
| 0.604873811 | 0.610036122                                                                                            | 0.511727165 | 1           | 0.664188225 | 0.698358074 |
| 0.616879055 | 0.630522426                                                                                            | 1           | 0.482265476 | 0.436458887 | 0.260781569 |
| 0.784389533 | 1                                                                                                      | 0.30035106  |             | 0.149757348 | 0.299110013 |
| 0.782772041 | 0.565240963                                                                                            | 0.384781007 | 0.976708309 | 1           | 0.943722677 |
| 0.862511815 | 0.775503969                                                                                            | 0.773429531 | 1.037275373 | 1           | 0.665653737 |

0.617205989 0.565538409 1.259012958 0.58667709 1 0.501094273  
 0.783327189 0.989211994 0.684934565 0.465430188 0.934290836  
 YJL167W YJL167W::ERG20::May be rate-limiting step in sterol biosynthesis  
 pathway 1 1.049179944 0.977842024 1.187000747 1.314820951 1  
 1.085820558 1.104902525 1.205632679 1.290991628 1 0.83395702  
 1.002833681 1.005934904 1.077726585 1 1.439397997 1.350897059  
 1.372818557 1.520400475 1 1.350841524 0.565927299 0.862041007  
 1.370412606 1 0.972024666 0.964378711 1.18018231 1.159714052  
 0.989687667 1 0.8699201 1.144134733 0.768039328 0.983686287  
 1.041418406 1 0.842899362 0.768041117 1.072661807 1.124259833  
 1.039771118 0.95705708  
 YLR403W YLR403W::SFP1::Inhibits nuclear protein localization when present in  
 multiple copies 1.119239858 0.775535051 1.147217822 0.6921311  
 1.107816146 1.124743221 0.687659439 1.241800926 1.056659297  
 0.628688494 1.028917438 1 1.389071501 0.553594327 1.258919041  
 0.502887269 1 0.713127331 0.708783664 1 1.06524891  
 1.047822871 1.503517505 1.367226002 1.16999051 1 0.766780897  
 0.598731296 0.663075842 0.72253577 0.383169813 1 0.781584406  
 0.847996349 0.96723873 0.850330273 0.903235348 0.813454714  
 YJL169W YJL169W::YJL169W::molecular\_function unknown 1 1.167177978  
 1.292223216 1.011294217 1.727001737 1 1.000549796 0.976557438  
 1.213617813 1.50737223 1 0.791209924 1.025647874 1.26468743  
 1.088321433 1 0.761334502 0.792412436 1.084840618 1  
 1.270503299 1.936543264 1.34461581 1.168838602 1 0.690132231  
 0.79912325 0.580775611 0.628132441 0.799665773 1 0.853704932  
 0.986368817 0.822074902 0.835269222 2.007956631 1 1.037289586  
 1.504608705 1.197741177 1.830925592 1.497735861 1.377356512  
 YLR417W YLR417W::VPS36::Defective in vacuolar protein sorting 1  
 0.952268309 0.895041469 0.811657467 0.780815081 1 0.941793201  
 0.879010622 0.818121499 0.80058039 1 0.848152002 0.882487204  
 0.910043779 0.933487911 1 0.940659899 0.625418631 1  
 1.462984027 1.100801696 0.78082688 1.137088466 1 1.381380234  
 1.395131618 1.458177577 1.138395306 1.138181233 1 1.154570559  
 1.083378372 1.342023318 1.218180774 0.832043571 1 0.929529817  
 0.774653509 0.763078174 0.768383108 1.177714305  
 YJL183W "YJL183W::MNN11::member of a cis Golgi complex that is involved in  
 mannan synthesis, other complex members include Mnn10p, Hoc1p, Anp1p, Mnn9p" 1  
 0.853770365 0.667708456 0.859046515 0.811497813 1 0.743414847  
 0.802738376 0.763960374 0.943565713 1 0.771883374 0.582140249  
 0.551270291 0.826175884 1 0.926061648 0.581661529 0.640352566  
 0.771501086 1 1.219246397 0.87224375 0.552484047 0.793440178 1  
 1.096826442 0.885527013 1.22323551 1.538492344 0.935609861 1  
 0.764925675 0.661871226 0.564805858 0.651330524 0.551534802 1  
 0.848179203 0.651341945 0.895276437 0.893735004 0.682077586 0.769673503  
 YJL185C YJL185C::YJL185C::molecular\_function unknown 1 1.734958314  
 1.837105691 1.547508443 1.919278895 1 1.424186868 1.567352718  
 1.83851014 1.774701968 1 1.444095521 1.662719647 2.345383666  
 2.089339893 1 2.432331113 0.491278463  
 0.593774309 0.461597517 0.547915545 1 1.032221024 1.216320649  
 1.051880772 1.168252879 0.90679846 1 0.777841202 1.145745859  
 1.334898665 1.587747651 1.227116518 1 1.193882719 1.21433895  
 1.279616136 1.381156863 1.210112341  
 YJL187C YJL187C::SWE1::Protein kinase that inhibits G2/M transition. <br>S.  
 pombe wee1+ homolog 1 0.834326482 0.8262505 1.043170561 0.808159941 1  
 0.914440928 1.009301865 0.94708361 0.969601541 1 0.900629308  
 0.757794519 0.593869819 1.215096089 1 0.642952046 0.409137097  
 0.688736069 0.593797771 0.629814357 0.880038354 0.685981535 1

1.031730344 1.074180584 1.147794991 1.148253076 1.052993892 1  
0.796943685 0.787529418 1.549066141 1.633925764 0.349049901 1  
0.85388096 1.173261512 0.921705472 0.651915849 0.796672725 1.065634415  
YJL189W YJL189W::RPL39::Homology to rat L39 1 0.949388918 1.761040942  
0.847834916 1 0.907700951 0.917227566 1.879273773 1.332563109 1  
0.797541524 1.170670463 1.226860473 0.923372451 1 0.614086172  
0.283072757 0.1590268 0.461045777 1 1.904381131 1.719189843  
1.120084344 0.795585744 1 0.665484112 0.674180612 0.33491875  
0.391879726 1.082298225 1 1.687215777 2.308760997 1.126699145  
1.42556182 3.332772511 1 0.986069934 1.467379963 1.372028766  
2.494167328 1.674090476 2.004303366  
YLR419W YLR419W::YLR419W::helicase 1.071219696 0.862085259  
1.174053247 0.969179319 0.851141795 0.941313367 0.754566868  
0.972945002 0.882135969 0.868244504 1.136606242 1 1.056586049  
0.271385112 0.852383176 0.625257748 0.41793595 1  
1.154797303 1.304128328 1.456440626 1.281194719 1.283593204 1  
0.608779337 0.94410765 1 0.893710258 0.976140948 0.526983499  
1.168036119 0.504542439 2.994634147  
YLR419W YLR419W::YLR419W::helicase  
1 1.018559955 0.935446245 1.026841195  
1.207624567 1.062232727 1 0.869025906 0.687008863 0.771788725  
0.733000441 0.521151967 1 0.790007986 0.637901846 0.868467747  
0.759541449 0.626078626 0.850230918  
YLR421C YLR421C::RPN13::Proteasome subunit 1 0.914939294 0.998276258  
0.761885487 1.193483409 1 0.745816838 0.822249137 1.119983068  
1.014242117 1 0.829267828 0.944714742 1.200817265 0.842847271 1  
1.381421503 0.580830301 1.309814828 1.426736197 1 3.316121514  
3.143782609 3.720566757 2.159624725 1 1.071820252 1.472872641  
1.076894558 1.041690114 1.074217753 1 1.095031896 1.612414083  
1.187401765 0.940135237 1.710678613 1 1.721242647 2.516126425  
1.451326683 1.958518063 1.847132063 1.530590775  
YLR423C YLR423C::APG17::required for activation of Apg1 protein kinase 1  
0.820290802 0.79360997 1.144283046 1 0.758166241 0.813438505  
1.098502756 1 0.806806255 0.904296086 1.128926193 0.98469118 1  
0.90871439 0.63787446 0.720381072 1.346635098 1 1.34583169  
1.631368306 3.176007245 2.131212204 1 0.842434069 1.050913098  
0.630330931 0.63437961 1.074037843 1 1.007664876 1.300159113  
1.391680563 1.263523504 1.652226511 1 1.295889536 1.306576896  
1.412822294 2.354430057 1.23375425  
YJL191W "YJL191W::RPS14B::Homology to human S14 and rat S14, E. coli S11" 1  
1.481685516 1.374870792 0.982153546 1.385045507 1 1.106140881  
1.095248304 1.340222289 1.237108159 1 1.076308332 0.981533044  
1.198785894 0.955752075 1 0.71764826 0.43821116 0.268702326  
0.474857873 1 1.030654132 1.174708076 0.453330006 0.627822011 1  
1.241889066 0.87930972 1.092346538 1.301295279 1.22184278 1  
0.86534988 0.999853879 0.676498429 0.54011581 0.886788968 1  
0.928760515 0.993871145 0.758484466 1.247809337 0.505850736 0.971942653  
YLR425W YLR425W::TUS1::TOR Unique function Suppressor; exchange factor for  
RHO1 1 1.117996172 0.990201112 0.952362936 1.055078488 1  
1.201119923 1.014762113 0.908578391 1 1.017358641 1.028250451  
0.697753176 0.945918412 1 1.10941338 0.594878932 0.708762737  
0.671962287 1 0.856265949 0.831596197 0.654324506 1  
1.008519978 1.057739313 1.024297467 1.248545708 1.29548079 1  
0.98380032 0.536719534 0.764150753 0.740661913 0.491378513 1  
0.767703078 0.764245358 0.805483372 0.496488975 0.856197388 0.422050762

YJL193W YJL193W::YJL193W::molecular\_function unknown 1 1.217238005  
1.117182848 1.038725286 1.3445189 1 1.032862928 0.975121389  
1.315606987 1.288013437 1 1.04550504 0.91379583 1.091897514  
0.969941109 1 0.742543233 0.58579469 0.699603429 1.016374186 1  
0.697309743 1.330052834 0.895930307 0.810103241 1 0.842663755  
0.839614701 0.70264157 0.969834787 0.875045154 1 0.760552305  
0.837409111 0.586827877 0.70443372 0.851571639 1 0.780793793  
0.836572836 0.753418985 0.834312567 0.887882787  
YLR427W YLR427W::YLR427W::molecular\_function unknown 1 0.719161194  
0.799588947 0.994715476 0.746271623 1 0.84821019 0.872046924  
0.792286154 0.786776386 1 0.850221346 0.772025537 0.59687349  
0.910953405 1 0.728599475 0.613043923 0.73042623 1  
1.172836502 1.545490985 1 0.93814525 1.165478121  
0.91466979 0.90467904 1.024879474 1 1.021203461 0.861092245  
0.950185414 0.846439027 0.593439915 1 0.889712836 0.942475609  
0.992002204 0.685053215 1.028314071 0.888758347  
YJL207C YJL207C::YJL207C::not yet annotated 1 1.886630325 1.736665679  
2.0323498 1.626353947 1 1.723091297 1.716926921 1.486361054 1  
1.61065327 1.547623492 1.520779416 1.685108029 0.959568213  
1 0.91632065 0.855014477 0.889214  
0.995368623 0.935621238 1 0.973771144 1.098474506 0.909591568  
1.372915586 0.786859942 1 0.83030987 0.808055959 0.94031175  
0.907387109 0.742529106 1.018350701  
YLR441C YLR441C::RPS1A::Homologous to rat S3A 1 1.080114572  
0.962969095 0.981936535 1.424722031 1 0.993595877 0.878231237  
1.030195381 0.963364626 1 0.754774767 0.6794128 0.504144664  
0.820311269 1 0.659568658 0.260500692 0.15365536 0.42752384 1  
1.562789543 0.750991393 0.438565414 0.75986337 1 1.209243643  
1.152094871 1.061520793 1.112702922 1.356935608 1 1.195326435  
1.276614878 0.782423913 0.515812075 1.164346293 1 1.52333477  
1.318786024 1.052692859 1.868128656 1.259454778 1.382610293  
YLR443W YLR443W::ECM7::Involved in cell wall maintenance 1  
0.970891826 0.853397884 0.880635964 1.05296987 1 0.719960139  
0.843571306 0.910160499 0.972374799 1 0.902342633 0.744316442  
0.8059835 1.038391819 1 0.488261989 0.692430951 0.786768126 1  
0.991595743 1.269245918 1.30016372 1.427725219 1 0.978469933  
1.011993162 1.040020749 1.07238408 1.031516851 1 0.882666941  
0.80075784 0.895126991 0.745828434 0.683154138 1 0.974614578  
0.873846441 0.95017953 0.984754393 0.860957014 0.819584055  
YJL209W YJL209W::CBP1::Protein required for COB mRNA stability or 5'  
processing 1 1.202707996 1.140816894 2.362347322 1.040261744 1  
1.700261277 1.221995246 1.842101658 1.577600917 1 0.936851347  
1.364902362 1.376660257 1.687977593 2.140646756 6.996488371  
6.792194796 1.379424926 1 0.289053452 1  
0.935378174 1.067045541 0.855845094 1.131771118 1.140731362 1  
0.974111433 0.745313314 0.683997333 0.947290221 0.698992472 1  
0.899343333 0.654642302 0.797174564 0.695483641 1.092349442 0.582289979  
YLR445W YLR445W::YLR445W::molecular\_function unknown  
1.116024646 0.917485925  
2.033360058 0.108267534  
1.047485954  
1.348759653  
YJL211C YJL211C::YJL211C::molecular\_function unknown 1 1.550768106  
1.367834767 1.115303795 0.82283409 1 1.298734677 1.258005234  
1.09991118 1.152306228 1 1.46685081 1.360972904 1.104966438  
1.179673611 1 1.300225327 1.205568286 0.976502217  
1.058227779 0.577000974 0.754471002 1 1.166226585 1.172886316

1.655549131 1.494940403 1.350989568 1 0.956950883 0.855576788  
0.803212536 0.811716409 0.483454253 1 0.979339893 0.698324524  
0.800183669 0.856843018 0.679638537 0.913275817  
YLR447C YLR447C::VMA6::vacuolar ATPase V0 domain subunit d (36 kDa) 1  
0.963152558 0.776070613 0.860813734 0.920668097 1 0.852898646  
0.816473203 1.051666845 0.859691461 1 0.660691899 0.745109882  
0.716811959 0.862711294 1 1.397876869 1.057460541 0.981977494  
1.241234067 1 1.080377626 0.53910381 0.695785432 0.793599959 1  
0.975106294 0.899902177 0.945305392 1.044750234 1.01984565 1  
1.05380251 1.318197934 0.922844544 0.696118094 1.006072009 1  
1.424863738 1.391633635 1.125828878 1.679810262 1.263509528 1.125176811  
YJL213W YJL213W::YJL213W::molecular\_function unknown 1 1.320129929  
0.727689735 1.188233228 0.654212298 1 1.234486441 1.159663238  
0.675490219 0.87281412 1 1.240711252 0.97736598 0.700407041  
0.838015853 1 1.316487408 0.875406456 1.187382958 0.537998379 1  
0.689518701 0.72231848  
1  
YJL213W YJL213W::YJL213W::molecular\_function unknown  
1 0.872750016  
0.546487529 1.09925728 1.520057174 0.781319383 1 0.58754397  
0.597866245 0.811414795 0.702713859 0.218929045 1 1.017773276  
0.625030338 0.84156861 0.549289336 0.722727272 0.570031244  
YLR449W "YLR449W::FPR4::Homolog of homolog of the nucleolar FKBP, Fpr3" 1  
0.980660038 0.871373954 0.816190573 0.929054443 1 0.944393825  
0.836996722 0.97546197 0.929630633 1 0.707436451 0.483274331  
0.407755209 0.922180003 1 0.456775137 0.177077411 0.203254379  
0.301054431 1 0.667709308 0.289819741 0.257304003 0.501605555 1  
0.885651775 0.862140692 0.767307254 0.951544757 0.874113479 1  
0.955935135 0.751149347 0.483186695 0.722047809 0.949458229 1  
0.879652117 0.737402479 0.824377509 0.99143565 0.372783836 0.592797436  
YJL215C YJL215C::YJL215C::molecular\_function unknown 1 1.415485721  
1.672827693 1.589497996 1 1.691985492 1.687843865 1  
1.517150065 0.484105245  
0.225848405 1 1.323734418 1.561476753  
1.591347899 1 0.779187134 0.635857569 1  
0.924393425 0.632337278 1.098357522 0.705401301 1.442090294 0.39665768  
YJL217W YJL217W::YJL217W::molecular\_function unknown 1 1.778620256  
1.779446104 1.422524599 2.088862669 1 1.337411214 1.428491074  
1.801375756 1.877534764 1 1.19518895 1.350638989 2.082441073  
1.818549264 1 1.306828608 0.885125148 1.221454421 2.481667595 1  
1.556837619 1.361914744 2.166792409 6.202385292 1 1.266113343  
1.628264082 2.547122373 1.549185728 1.343683181 1 1.208456357  
1.661561143 2.661774128 1.972941372 2.126564416 1 1.32890753  
1.729705211 2.461289614 2.128883509 2.22158437 3.829979439  
YJR007W YJR007W::SUI2::eIF2 is a heterotrimeric GTP-binding protein <br>  
SUI3 encodes the beta subunit<br> GCD11 encodes the gamma subunit 1  
1.006203686 0.869287929 0.794198436 0.995550273 1 0.932206236  
0.863911618 0.84117774 0.942698437 1 0.863332747 0.725854411  
0.599506094 0.782987462 1 0.979397081 0.728707732 0.682739573  
0.906714008 1 0.913399158 0.457513085 0.518189382 0.877628767 1  
0.958342452 0.911581271 1.069588526 1.09350676 1.022974937 1  
0.840885649 0.817091031 0.580901941 0.535709798 0.629456618 1  
0.830695563 0.673289276 0.67662928 0.863331033 0.620220022 1.018350701  
YJR009C YJR009C::TDH2::glyceraldehyde 3-phosphate dehydrogenase 1  
1.914011048 1.426416313 1.145295697 1.223370311 1 1.434277943  
1.396397176 1.144678127 1.133070743 1 1.649444255 1.989543178

|             |                                                                                                                                                                                                          |             |             |             |             |             |             |
|-------------|----------------------------------------------------------------------------------------------------------------------------------------------------------------------------------------------------------|-------------|-------------|-------------|-------------|-------------|-------------|
| 2.663993224 | 1.395943512                                                                                                                                                                                              | 1           | 0.776017585 | 1.457340511 | 1.776230693 |             |             |
| 0.816006925 | 1                                                                                                                                                                                                        | 1.079532211 | 0.704423175 | 0.720501925 | 1.080582695 | 1           |             |
| 1.025508933 | 0.947677414                                                                                                                                                                                              | 2.224198863 | 1.136985322 | 1.034408694 | 1           |             |             |
| 1.387563957 | 1.709040305                                                                                                                                                                                              | 1.28385219  | 1.060203013 | 0.652762809 | 1           |             |             |
| 2.080492388 | 1.994128127                                                                                                                                                                                              | 2.653748851 | 1.952020095 | 2.178433578 | 1.065634415 |             |             |
| YLR451W     | "YLR451W::LEU3::Regulates genes involved in branched chain amino acid biosynthesis and in ammonia assimilation. Positively regulated by alpha-isopropylmalate, an intermediate in leucine biosynthesis." |             |             |             |             | 1           | 0.834104472 |
| 0.995676899 | 0.964039937                                                                                                                                                                                              | 0.943612719 | 1           | 0.896998327 | 0.911128635 |             |             |
| 1.080551051 | 0.950335121                                                                                                                                                                                              | 1           | 0.890972858 | 0.962273751 | 0.93118427  |             |             |
| 0.99204678  | 1                                                                                                                                                                                                        | 0.873926973 | 0.749553314 | 0.869901589 | 1.068594889 | 1           |             |
| 1.073978706 |                                                                                                                                                                                                          | 1.052945421 | 0.890149804 | 1           | 0.988715279 | 1.132453674 |             |
| 1.054271812 | 1.344880106                                                                                                                                                                                              | 1.291893062 | 1           | 0.754556995 | 0.571157421 |             |             |
| 0.562524796 | 0.803442828                                                                                                                                                                                              | 0.588970646 | 1           | 0.732527221 | 0.571420869 |             |             |
| 0.879952069 | 0.613236721                                                                                                                                                                                              | 0.790413313 | 0.528876872 |             |             |             |             |
| YLR465C     | YLR465C::YLR465C::molecular_function unknown                                                                                                                                                             |             |             |             |             | 1           | 1.070607913 |
| 0.711429428 | 1.176292153                                                                                                                                                                                              | 0.732681904 | 1           | 1.407537525 | 1.296203538 |             |             |
| 0.716122855 | 0.514208265                                                                                                                                                                                              | 1           | 0.97002204  |             | 0.272729671 | 0.931976727 | 1           |
| 0.742023847 | 0.474835925                                                                                                                                                                                              | 0.650949471 | 0.555409529 | 1           | 0.707387369 |             |             |
| 0.769321822 | 0.59060813                                                                                                                                                                                               | 0.383535437 | 1           | 0.735506522 | 0.745283534 |             |             |
| 1.292177151 | 1.264993948                                                                                                                                                                                              | 1.017988332 | 1           | 0.725471301 | 0.328654037 |             |             |
| 0.614408791 | 0.974235762                                                                                                                                                                                              | 1           | 0.664582204 | 0.399060698 | 0.922001069 |             |             |
| 0.440991574 | 0.637073703                                                                                                                                                                                              | 0.568279966 |             |             |             |             |             |
| YLR467W     | YLR467W::YRF1-5::Y'-helicase protein 1                                                                                                                                                                   |             |             |             |             | 1           | 0.946690129 |
| 0.730780737 | 1.107346708                                                                                                                                                                                              | 0.471566311 | 1           | 1.165388162 | 1.161771836 |             |             |
| 0.708534211 | 0.625007183                                                                                                                                                                                              | 1           | 0.962500344 | 0.971789053 | 0.477279499 |             |             |
| 0.874723863 | 1                                                                                                                                                                                                        | 0.889679788 | 0.702050284 | 0.841683631 | 0.558583402 | 1           |             |
| 0.628039497 | 0.393866911                                                                                                                                                                                              | 0.31771319  | 0.787081691 | 1           | 0.797798246 |             |             |
| 0.847207562 | 1.126885969                                                                                                                                                                                              | 1.121332184 | 0.946442582 | 1           | 0.730759592 |             |             |
| 0.599079487 | 0.767072769                                                                                                                                                                                              | 1.005728894 | 0.492003725 | 1           | 0.871790129 |             |             |
| 0.742298033 | 1.09218914                                                                                                                                                                                               | 0.792846252 | 0.831233464 | 0.712757945 |             |             |             |
| YJR010W     | YJR010W::MET3::one of three genes essential for the assimilatory reduction of sulfate to sulfide (with sulfite as an intermediate product)                                                               |             |             |             |             | 1           |             |
| 1.187368696 | 1.688065358                                                                                                                                                                                              | 1.423507703 | 0.833436707 | 1           | 1.025324944 |             |             |
| 1.180853026 | 1.209535207                                                                                                                                                                                              | 0.970280924 | 1           | 1.451262818 | 3.27414326  |             |             |
| 1.453707629 | 0.800597507                                                                                                                                                                                              | 1           | 1.932178109 | 1.162969463 | 1.136932306 |             |             |
| 0.907419145 | 1                                                                                                                                                                                                        | 1.33788825  | 0.896228354 | 0.784248386 | 0.9008343   | 1           |             |
| 0.994206974 | 0.919472845                                                                                                                                                                                              | 1.179620519 | 1.193445205 | 1.144273829 | 1           |             |             |
| 1.16034958  | 1.127257092                                                                                                                                                                                              | 0.770786357 | 0.855575412 | 1.034947781 | 1           |             |             |
| 0.745493309 | 1.305895994                                                                                                                                                                                              | 1.007706825 | 0.987124154 | 0.928977608 | 0.830967177 |             |             |
| YML002W     | YML002W::YML002W::molecular_function unknown                                                                                                                                                             |             |             |             |             | 1           | 0.984315554 |
| 0.850696004 | 1.072458862                                                                                                                                                                                              | 0.812275999 | 1           | 1.220758766 | 1.159662377 |             |             |
| 0.870748889 | 1                                                                                                                                                                                                        | 1.072432111 | 1.120193981 | 0.822188987 | 1.03841941  | 1           |             |
| 0.795462673 | 0.66199145                                                                                                                                                                                               | 1.395024162 | 1.154633859 | 1           | 1.587696596 |             |             |
| 1.379644026 |                                                                                                                                                                                                          | 1.371365535 | 1           | 0.86279775  | 1.149774954 | 0.988185597 |             |
| 0.903449525 | 0.987258095                                                                                                                                                                                              | 1           | 1.002714914 | 0.865675175 | 1.238006375 |             |             |
| 1.185524534 | 1.033904932                                                                                                                                                                                              | 1           | 1.142374392 | 1.220365047 | 1.182847149 |             |             |
| 0.839297131 | 1.221782097                                                                                                                                                                                              | 0.933415171 |             |             |             |             |             |
| YJR012C     | YJR012C::YJR012C::molecular_function unknown                                                                                                                                                             |             |             |             |             | 1           | 1.287295849 |
| 1.578224095 | 1.153649047                                                                                                                                                                                              | 1.579328402 | 1           | 1.230691845 | 1.176844372 |             |             |
| 1.28818214  | 1.433435436                                                                                                                                                                                              | 1           | 1.348798988 | 1.485203013 | 1.640852651 |             |             |
| 1.17443468  | 1                                                                                                                                                                                                        | 1.003820724 | 0.750827206 | 0.738703189 | 0.803165846 | 1           |             |
| 1.23926434  | 1.366494775                                                                                                                                                                                              | 1.165145286 | 0.986016142 | 1           | 1.051556704 |             |             |
| 1.079446822 | 0.967903303                                                                                                                                                                                              | 0.919378294 | 1.288042365 | 1           | 1.233919341 |             |             |
| 1.650154533 | 1.279987515                                                                                                                                                                                              | 1.313006583 | 1.749134583 | 1           | 1.036290666 |             |             |
| 1.179065872 | 0.893991618                                                                                                                                                                                              | 1.323244818 | 0.965013254 | 2.041955183 |             |             |             |

YML004C YML004C::GLO1::Regulated by HOG (high osmolarity glycerol)-MAP  
(mitogen-activated protein) kinase pathway in osmotic stress response 1  
0.890533835 1.06723618 1.100873089 1.150570983 1 0.951751116  
1.006332954 1.444750666 1.356491056 1 0.778932241 1.15449475  
2.1129264 1.208879786 1 1.327093391 1.62903035 2.624345741  
2.605105078 1 1.875144983 1.627906846 3.926967797 2.822002532 1  
1.079622201 1.045023603 1.394082392 1.031069225 1.181609673 1  
1.102313505 0.937210435 1.129419799 0.814399253 0.730552656 1  
1.007747715 0.78554799 0.940516554 0.766523318 1.243240039 1.570869482  
YML006C YML006C::GIS4::GIG3 suppressor 1 0.700581658 0.76777501  
0.811825789 0.818843878 1 0.786655189 0.747023605 0.8883746  
0.674692701 1 0.746722611 0.770302378 0.490879085 0.861653158 1  
0.75938439 0.662539008 0.611700476 0.659221116 1 0.950045204  
0.831341099 1.036427051 1.279252937 1 1.007879517 0.827004292  
0.882180744 0.830773422 0.986313845 1 0.96247162 0.847023367  
0.823258148 0.889997477 0.783437922 1 0.856383824 0.79909199  
0.919771237 0.911553431 0.903434709 0.908897701  
YJR014W YJR014W::YJR014W::molecular\_function unknown 1 1.036823527  
1.6533768 0.977110882 1.585090537 1 1.223748589 1.242324236  
1.397854936 2.324815554 1 0.951873194 1.33965571 1.358868683  
1.176320957 1 0.548612242 1 1.339388922  
1.280040669 1.133944378 1 1.122508232 1.58587138 0.947031647  
0.767494684 1.103298828 1 1.395295216 1.525248624 1.403724702  
1.421039875 1.977211809 1 0.906177387 1.201810014 0.946579239  
1.084778486 0.727753466 1.347585366  
YML008C YML008C::ERG6::ergosterol synthesis 1 0.890149938 0.949275029  
0.954443856 0.915796564 1 0.924851393 0.910785596 0.905951153  
0.856893259 1 0.708833664 0.87706591 0.904858759 0.815194947 1  
0.788345046 0.570416327 0.932837685 1 0.96840601 0.574547636  
0.745539992 1.375012139 1 0.90056481 1.041824604 1.488986014 1.357263  
1.068967152 1 0.881720324 0.955770565 1.204921972 2.126627781  
1.191764793 1 0.732997343 0.77201348 1.334932066 0.928272306  
0.938434596 1.14881872  
YJR016C YJR016C::ILV3::catalyzes third step in common pathway leading to  
biosynthesis of branched-chain amino acids 1 1.565103133 0.885909591  
1.370121971 0.68888808 1 1.487260879 1.230859989 0.739699526  
0.941184276 1 1.217412218 0.706656749 0.362432178 0.789450026  
1 0.664631514  
0.375748547 0.350056034 1.179461463 0.710915454 1 0.495675217  
0.165973311 0.101148809 0.191037533 0.475262055 1 0.545288194  
0.200068624 0.498526689 0.882952781 0.6418271 0.587543707  
YML027W YML027W::YOX1::Homeodomain protein that binds leu-tRNA gene 1  
0.936289164 0.947838995 1.322479406 1.174362619 1 1.130081168  
1.2448201 1.354293427 1.671419487 1 0.654069578 0.730645393  
1.077602117 1.686806344 1 0.813180611 1  
0.464819501 0.886703241 1 0.588731934 0.650029939  
0.864167387 0.828615847 0.794334943 1 0.503513756 0.549844849  
0.536190586 0.843043337 0.849280595 1 0.560574023 0.557104054  
0.959980295 0.785118976 0.722618021 0.960559531  
YJR030C YJR030C::YJR030C::molecular\_function unknown 1 1.422030774  
0.933322953 1.018981803 1 0.994597357 1.03181408 1.014182888  
1.02862097 1 1.070809137 0.795299769 0.682137525 0.92627996 1  
0.681147693 2.45555445 0.46017203 0.496722814 1 0.959246504  
1.309673649 0.675866483 0.953015948 1 1.177297296 0.846474112  
0.844118456 0.944374929 0.954455105 1 1.042138424 1.115766975  
1.094216027 0.869081674 1.268091909 1 0.823962001 1.408563203  
0.888523768 1.176215984 0.908504665 1.56211325

YML029W "YML029W::USA1::Identified by its interaction with the U1 snRNP-specific protein, Snplp." 1 0.764016961 0.740977672 0.980387465  
0.518898411 1 0.994314727 1.130395318 0.836872588 0.658706855 1  
1.138409992 1.178347964 0.586013059 0.933725539 1 0.752443209  
0.793981697 0.999736476 0.589815549 1 1.510968601 1.66922226  
1.305590482 0.917326244 1 1.056128335 1.287354417 1.41410343  
1.066044475 0.94716552 1 0.949826507 0.655684532 0.944352473  
0.965710967 0.381307934 1 0.782286312 0.827544075 1.061332442  
0.35505937 0.787017092 0.795942198  
YJR032W YJR032W::CPR7::a cyclophilin related to the mammalian CyP-40; physically interacts with RPD3 gene product 1 0.840919284  
0.753713263 0.860576792 1 0.848728933 0.657394766 0.842579914  
0.877835727 1 0.685505896 0.567376686 0.765843776 0.77929571 1  
0.671284323 0.498633602 0.34450892 0.613014571 1 1.116519305  
1.367279134 1 0.972289706 0.72905684 0.637159046 0.930983283  
1.05694361 1 0.799922334 0.659484538 0.603351028 0.595357527  
0.886388158 1 0.901954075 0.642084292 0.736927098 0.921430262  
0.800422924 1.261774171  
YML031W "YML031W::NDC1::dispensable for mitotic spindle pole body duplication, but required for insertion of nascent spindle pole bodies into the nuclear envelope. ndc1 parental spindle pole bodies form monopolar spindles in mitosis. Required for meiosis II." 1 0.772569167 0.626244641 0.933374329  
0.709527638 1 0.882289514 0.866469851 0.865952871 0.786248229 1  
0.789859794 0.708018744 0.501138108 0.917911986 1 1.005539119  
0.634462801 0.849736614 0.77572747 1 0.956277513 0.975304378  
0.949676982 0.764955997 1 0.961230493 1.006604212 1.183811007  
1.214356312 0.82937666 1 0.862373703 0.676764443 0.73440467  
0.700617155 0.528149277 1 1.022013278 0.928520201 1.09807286  
0.798444926 0.712508675 0.684737973  
YJR034W YJR034W::PET191::Required for assembly of active cytochrome c oxidase 1 0.963690732 1.371930826 1.12395265 1.816366392 1  
0.977328513 1.002948455 1.614344872 1 1.091628785 1.469015134  
2.035435403 1.556488059 1 1.067063367 1.237271726 1.207554472  
1.419098962 1 1.524250019 1.967066328 1.713011655 0.809304461 1  
1.10601164 1.342893237 0.799326434 0.88763947 1.075032065 1  
1.539227413 2.094676526 1.500745485 1.511691411 2.477223568 1  
0.84370201 1.254052482 0.871502536 0.926564358 1.30796343 1.194351103  
YJR036C YJR036C::HUL4::ubiquitin-protein ligase (E3) 0.980104457  
0.999882228 1.013232882 0.892306522 1.163186555 0.936760883  
0.832625461 1.432290772 1.648980819 1.145417088 1  
1.640070597 1.236705389 0.930255522 1.269352848 1 1.944917305  
2.523706354 2.682805223 0.960946562 1 1.020823084 1.105306358  
0.992697527 1.024807454 1.236949074 0.729240791 0.93832708  
0.739622488 0.835956619 1 0.784865281 1.118099108 0.892379009  
0.708766532 0.933076638  
YJR038C YJR038C::YJR038C::molecular\_function unknown 1 1.187059597  
1.213125015 1.459934435 0.970604169 1 1.747885693 1.014024643  
0.964464766 1 2.036930537 1.496135948 1 1.194820153  
1.456031712 0.998507454 1 0.843391905  
0.6433603 0.948696125 0.68935363 0.738705198 1  
1.274978239 1 0.790823478 1.159221791 0.713413752  
0.729826673 3.244186853  
YJR040W "YJR040W::GEF1::Integral membrane protein highly homologous to voltage-gated chloride channels from humans, mice and fish" 1 0.781603042  
0.681813652 0.468365958 1 0.961904135 1.067139412  
0.538142272 1 1.038415214 0.957661731 0.508320468 0.730691955 1  
0.694105351 0.568145265 0.700196512 0.510499669 1 1.208811418



|             |                                      |             |             |             |             |
|-------------|--------------------------------------|-------------|-------------|-------------|-------------|
| 1.100237198 | 0.790056486                          | 0.864825067 | 1           | 1.262321287 | 1.304545845 |
| 1.480181938 | 1.245783753                          | 1.232022326 | 1           | 0.874365871 | 0.946134899 |
| 1.015828209 | 1.010358037                          | 0.585707082 | 1           | 0.991426699 | 1.007926009 |
| 1.015441995 | 0.574296776                          | 0.749407487 | 0.799444701 |             |             |
| YMR085W     | YMR085W::YMR085W::molecular_function | unknown     | 1           | 1.268403743 |             |
| 1.369607413 | 3.440859945                          | 0.644976665 | 1           | 2.140373402 | 1.640393268 |
| 3.239238773 | 2.801106145                          | 1           | 1.188493284 | 2.361672262 | 2.286628962 |
| 2.467367731 | 1                                    | 0.502092573 | 1.324970024 | 1.589840878 | 0.240739413 |
| 0.543974429 | 0.267988065                          | 0.155167967 | 0.222026703 | 1           | 1.545629062 |
| 1.671138414 | 1.946696349                          | 3.59469475  | 2.589342919 | 1           | 0.849654266 |
| 0.220543623 | 0.509827015                          | 0.980023927 | 0.121865163 | 1           | 0.429271551 |
| 0.280126227 | 0.424428749                          | 0.219229509 | 0.548063419 | 0.217154748 |             |
| YCLX02C     | YCLX02C                              | 1.10077057  | 0.883722794 | 1.383146589 | 1.042602041 |
| 1.165931063 | 1.018200099                          | 1.324518801 | 0.546151307 | 0.543666536 |             |
| 0.394975307 | 1.699524847                          | 1           | 0.338129234 |             |             |
|             | 1                                    | 0.505003737 | 0.834822821 | 0.778318983 | 1           |
| 0.549170011 | 0.416760669                          | 0.751353237 | 1           | 0.505149278 |             |
| 0.545362667 | 1.196674605                          | 0.67658722  | 0.630449305 |             |             |
| YCLX04W     | YCLX04W                              | 1           | 1.282472907 | 0.944407334 | 0.62621697  |
|             |                                      |             | 0.441827007 | 1           |             |
| 1.211954155 | 1.099494377                          | 0.721473359 | 0.520704103 | 1           | 1.629251573 |
| 1.281498891 | 1.047732551                          | 0.713020273 | 0.775286432 | 1.088816834 |             |
| 1           |                                      | 1           | 1.027555775 | 1.013239145 | 1.191747553 |
| 1.154556098 | 0.968221335                          | 1           | 0.729376238 | 0.860075133 | 0.729174152 |
| 0.900009997 | 0.608736193                          | 1           | 0.660686446 | 0.661730929 | 0.904837406 |
| 0.371580712 | 1.060423549                          | 0.977196433 |             |             |             |
| YCLX06C     | YCLX06C                              | 1           | 1.138489593 | 0.928058632 | 0.789610206 |
|             |                                      |             |             |             | 1           |
| 1.124539854 | 1.102816642                          | 0.823669177 | 0.955351681 | 1           | 1.075719715 |
| 1.216699387 | 1.484613181                          | 1.001352523 | 1.763706802 | 1.592340901 |             |
| 1.197885418 | 1.481984593                          | 1           | 0.885544043 |             |             |
| 0.99011707  | 0.908719362                          | 0.962416364 | 0.787806181 | 1           | 1.0317609   |
| 1.107057056 | 0.955329911                          | 0.774026515 | 0.891234235 | 1           | 0.805066425 |
| 0.842735582 | 0.74059341                           | 0.815736779 | 0.945202252 | 0.791564082 |             |
| YCLX08C     | YCLX08C                              | 1           | 1.857088707 | 1.48436498  | 0.936913249 |
|             |                                      |             |             |             | 1.11195475  |
| 1.487917509 | 1.533921104                          | 1.134894497 | 1.084342794 | 1           | 101.3811037 |
| 126.7772464 | 31.3549099                           | 13.30727152 | 1           | 58.44147995 | 29.34426919 |
| 2.797011208 | 1                                    | 66.26207593 | 83.22588843 | 39.09361318 | 7.188372656 |
| 75.95999899 | 219.6530031                          | 251.7152521 | 33.28318928 | 2.940523927 | 1           |
| 49.12906774 | 195.0418355                          | 324.2794057 | 153.8536106 | 34.36200909 |             |
| 1.835085751 | 4.389718832                          | 3.594155905 | 0.174188367 | 0.010587861 | 6.188910292 |
| YJR054W     | YJR054W::YJR054W::molecular_function | unknown     | 1           | 0.900686998 |             |
| 0.743427257 | 1.041903609                          | 0.857063312 | 1           | 0.906219361 | 0.900708013 |
| 0.914719457 | 0.937372216                          | 1           | 0.623166211 | 0.545766155 | 0.452483166 |
| 1.124973298 | 1                                    | 0.634631404 | 0.587441016 | 0.740653371 | 1           |
| 0.813681171 | 0.576950293                          | 0.643272244 | 0.86582613  | 0.688180366 |             |
| 0.557763012 | 0.861808063                          | 0.726196707 | 0.928165867 | 1           | 0.876935685 |
| 1.227133849 | 0.893926645                          | 1.02204608  | 0.89785601  | 1           | 1.234766669 |
| 1.207212998 | 0.475666338                          | 0.920824588 | 1.385237183 |             |             |
| YCLX10C     | YCLX10C                              | 1           | 1.682462648 | 1.525763898 | 1.133896811 |
|             |                                      |             |             |             | 1.29855817  |
| 1.093354201 | 1.063446366                          | 1.333836773 | 1.333519209 | 1           | 1.918702743 |
| 1.745937938 | 1.057009532                          | 1.62612942  | 0.687799145 |             |             |
|             |                                      | 1           | 1.373203205 | 1.648788745 | 3.781542458 |
| 1.160796837 | 1.046803098                          | 1           | 0.652462277 | 0.894725414 | 0.74873864  |
| 0.891966254 | 1.32919803                           | 1           | 0.77244356  | 0.819087402 | 0.777420159 |
| 0.570050291 | 1.030749567                          | 1.337077805 |             |             |             |
| YCLX12W     | YCLX12W                              | 1           | 1.18612249  | 0.869846557 | 0.850870166 |
|             |                                      |             |             |             | 0.884467159 |
| 0.77179396  | 0.680351389                          | 0.791757599 | 0.849864885 | 1           | 0.924316185 |
| 0.813929466 | 0.751578196                          | 0.892855754 | 1           | 0.825084708 | 0.433045065 |

|         |                                                                                                                                                                                                |             |             |             |             |             |             |
|---------|------------------------------------------------------------------------------------------------------------------------------------------------------------------------------------------------|-------------|-------------|-------------|-------------|-------------|-------------|
|         | 0.681283148                                                                                                                                                                                    | 0.846531251 | 1           | 1.193389119 | 0.930293009 | 1.065411126 |             |
|         | 0.617076911                                                                                                                                                                                    | 1           | 1.19204885  | 0.887692755 | 1.134130275 | 1.373549364 | 1           |
|         | 0.740502578                                                                                                                                                                                    | 0.87550213  | 0.788249452 | 0.687456458 | 0.761209897 | 1           |             |
|         | 1.193102931                                                                                                                                                                                    | 1.070209636 | 1.07242175  | 0.521504437 | 1.060889505 | 0.911524592 |             |
| YJR056C | YJR056C::YJR056C::molecular_function unknown                                                                                                                                                   |             |             |             |             | 0.765860488 |             |
|         | 0.880306316                                                                                                                                                                                    | 0.960368595 |             | 0.716750985 | 0.735915958 |             |             |
|         | 1.117601464                                                                                                                                                                                    | 0.693238386 | 0.820788416 | 1.018989527 | 1.040665272 | 1           |             |
|         | 0.91635254                                                                                                                                                                                     | 1.033412626 | 1.941483494 | 1           | 2.383907556 |             |             |
|         | 1.60666157                                                                                                                                                                                     | 0.952604047 | 1           | 1.01535322  | 0.973293215 | 0.823958153 |             |
|         | 0.821920043                                                                                                                                                                                    | 1.004392459 | 1           | 1.313043312 | 1.647324462 | 1.20755009  |             |
|         | 1.424886158                                                                                                                                                                                    | 2.0295463   | 1           | 0.918457607 | 0.942588196 | 1.159225708 |             |
|         | 0.80655479                                                                                                                                                                                     | 1.169833634 |             |             |             |             |             |
| YCR014c | YCR014c::POL4::Probable homolog of mammalian DNA polymerase beta; may function in double-stranded DNA break repair                                                                             |             |             |             |             | 1           | 0.790950924 |
|         | 0.731550929                                                                                                                                                                                    | 0.889085412 | 0.927972226 | 1           | 0.745376784 | 0.839811354 |             |
|         | 0.908824231                                                                                                                                                                                    | 0.836617459 | 1           | 0.775391613 | 0.699651246 | 0.653369053 |             |
|         | 0.617663707                                                                                                                                                                                    | 1           | 0.638335302 | 0.822171474 | 0.841219576 | 1           |             |
|         | 0.856870477                                                                                                                                                                                    | 1.316482066 | 1.39604962  | 1.161413671 | 1           | 0.682007885 |             |
|         | 0.90149472                                                                                                                                                                                     | 0.827866133 | 0.739638873 | 1.046253227 | 1           | 0.7890806   |             |
|         | 0.920739188                                                                                                                                                                                    | 1.109840924 | 1.06702051  | 1.38608247  | 1           | 0.838987488 |             |
|         | 1.196867841                                                                                                                                                                                    | 0.992325098 | 0.76503667  | 1.339362494 | 0.971942653 |             |             |
| YJR058C | YJR058C::APS2::Related to the sigma subunit of the mammalian plasma membrane clathrin-associated protein (AP-2) complex                                                                        |             |             |             |             | 1           | 1.335479001 |
|         | 1.566008754                                                                                                                                                                                    | 0.974455072 | 1.840660833 | 1           | 1.047021402 | 1.615045492 |             |
|         | 1.566344487                                                                                                                                                                                    | 1           | 1.420290767 | 1.429780743 | 1.281097396 | 1.753522516 | 1           |
|         | 1.382220509                                                                                                                                                                                    | 0.993531488 | 1.632236363 | 1           | 2.91415115  | 4.460451722 |             |
|         | 3.327911906                                                                                                                                                                                    | 1.641102445 | 1           | 1.152201008 | 1.104665562 | 0.672587799 |             |
|         | 0.835829323                                                                                                                                                                                    | 1.062282317 | 1           | 0.95236422  | 1.902705148 | 1.722628643 |             |
|         | 1.233720728                                                                                                                                                                                    | 1.952027321 | 1           | 0.98645615  | 1.674937123 | 0.88981201  |             |
|         | 1.650444241                                                                                                                                                                                    | 1.198773037 | 1.242510482 |             |             |             |             |
| YCR016W | YCR016W::YCR016W::molecular_function unknown                                                                                                                                                   |             |             |             |             | 1           | 0.892124751 |
|         | 0.913463705                                                                                                                                                                                    | 0.828258032 | 1.066466331 | 1           | 0.68320641  | 0.634790532 |             |
|         | 0.958880216                                                                                                                                                                                    | 1.045593742 | 1           | 0.843733455 | 0.733907375 | 0.760020221 |             |
|         | 0.914609494                                                                                                                                                                                    | 1           | 0.929097819 | 0.627464314 | 0.531156686 | 0.695818908 | 1           |
|         | 1.480088152                                                                                                                                                                                    | 0.89023056  | 0.702935108 | 1           | 0.547551777 |             |             |
|         | 0.944141698                                                                                                                                                                                    | 1           | 0.947786532 | 0.955109325 | 0.760192222 | 1.252519649 |             |
|         | 1.3498089                                                                                                                                                                                      | 1           | 0.916181738 | 0.963999208 | 0.909773366 |             |             |
| YJR060W | "YJR060W::CBF1::centromere binding factor; binds in vivo to CDE I sites in centromeres (and some promoters), and induces DNA bending, required for mitotic segregation and normal growth rate" |             |             |             |             | 1           | 0.757599025 |
|         | 0.878111216                                                                                                                                                                                    | 0.743070152 | 1           | 0.983715016 | 0.776908582 | 0.834989836 |             |
|         | 0.747156983                                                                                                                                                                                    | 1           | 0.886583628 | 0.915017961 | 1.131770888 | 0.925853435 |             |
|         | 1.610138698                                                                                                                                                                                    |             | 1.149749999 | 1.153689493 |             |             | 1           |
|         | 0.935116307                                                                                                                                                                                    | 1.029328435 | 1.138742958 | 1.110982712 | 1.325076151 | 1           |             |
|         | 0.792122908                                                                                                                                                                                    | 0.891206166 | 1.254825403 | 1.143163142 | 0.854345293 | 1           |             |
|         | 0.747542157                                                                                                                                                                                    | 0.865836775 | 0.79974905  | 0.541440997 | 0.694313722 | 0.592797436 |             |
| YCR018c | YCR018c::SRD1::involved in the processing of pre-rRNA to mature rRNA                                                                                                                           |             |             |             |             |             |             |
|         | 1.066294538                                                                                                                                                                                    | 0.936108426 | 0.769284474 | 0.947641987 | 0.79423759  |             |             |
|         | 0.649143785                                                                                                                                                                                    | 0.895815786 |             | 0.834538686 | 1.008358642 | 1           |             |
|         | 1.028414725                                                                                                                                                                                    | 0.863895021 | 0.823570514 | 0.846836952 | 1           | 1.01458941  |             |
|         | 1.115891315                                                                                                                                                                                    | 1           | 1.0055378   | 1.113991099 | 1.09649046  |             |             |
|         | 1.189056137                                                                                                                                                                                    | 1.025304659 | 0.628168676 | 0.999178322 | 0.72756934  |             |             |
|         | 1                                                                                                                                                                                              | 1.174800117 | 1.240249361 | 1.094253421 | 0.585174804 | 1.266613166 |             |
|         | 1.006092019                                                                                                                                                                                    |             |             |             |             |             |             |
| YJR062C | "YJR062C::NTA1::Removes amide group from N-terminal asparagine and glutamine, to generate aspartate and glutamate, which are destabilizing terminal residues"                                  |             |             |             |             | 1           | 1.159134131 |
|         |                                                                                                                                                                                                | 1.001145491 | 1.033525436 | 0.868489297 | 1           |             |             |

|             |                                                                                                                                 |             |                                               |             |             |
|-------------|---------------------------------------------------------------------------------------------------------------------------------|-------------|-----------------------------------------------|-------------|-------------|
| 1.115679359 | 0.889243284                                                                                                                     | 1           | 1.390565579                                   | 1.281597352 | 0.900499427 |
| 1.280629882 | 2.137854588                                                                                                                     | 0.396143716 | 1.321212616                                   |             |             |
| 1.048914494 | 0.909112073                                                                                                                     | 0.926238166 | 1                                             | 0.856556716 | 1.01502075  |
| 0.97109452  | 0.967117224                                                                                                                     | 1.095782674 | 1                                             | 0.932125886 | 0.820435095 |
| 1.117757017 | 0.945354628                                                                                                                     | 0.682761246 | 1                                             | 1.027669029 | 0.917969294 |
| 0.844796867 | 0.681101406                                                                                                                     | 0.912144777 | 0.743404756                                   |             |             |
| YCR020c     | YCR020c::PET18::Transcription regulator                                                                                         |             |                                               | 0.730153185 |             |
| 0.731121178 | 0.617216577                                                                                                                     | 0.913378105 | 0.510927205                                   | 0.52502658  |             |
| 1.323783996 | 1.85100475                                                                                                                      | 2.728601655 | 1.275622641                                   | 1           | 0.965802891 |
| 1.130416374 | 1.583710021                                                                                                                     | 2.583951935 | 1                                             | 1.286705512 | 2.844950506 |
| 2.532858105 | 1.507622952                                                                                                                     | 1           | 0.900959457                                   | 0.748304343 | 0.730147162 |
| 1.040577837 | 1                                                                                                                               | 1.237411003 | 1.014679272                                   | 1.136649732 | 1.834956514 |
| 0.601089986 | 0.957264038                                                                                                                     | 0.943635325 | 1.094457867                                   | 0.896438927 | 1.564740036 |
| YJR064W     | YJR064W::CCT5::Required for assembly of microtubules and actin in vivo                                                          |             |                                               |             |             |
| 1           | 1.140317677                                                                                                                     | 0.956418239 | 1.020527941                                   | 0.885054608 | 1           |
| 1.153778402 | 1.01933794                                                                                                                      | 0.898086512 | 0.862395484                                   | 1           | 0.874983956 |
| 0.873096131 | 0.762938939                                                                                                                     | 0.750856997 | 1                                             | 0.579810963 | 0.863638909 |
| 0.445895577 | 0.553069162                                                                                                                     | 1           | 0.946821068                                   | 0.705439321 | 0.676430378 |
| 1.106407183 | 1                                                                                                                               | 0.963318011 | 0.965204435                                   | 0.98760818  | 0.91996334  |
| 1.061142094 | 1                                                                                                                               | 0.859352589 | 0.803592895                                   | 1.061143128 | 0.655850022 |
| 0.531525529 | 1                                                                                                                               | 0.956908982 | 0.788399366                                   | 0.858673477 | 0.674802787 |
| 0.636437206 | 0.78018096                                                                                                                      | YJR078W     | YJR078W::BNA2::Biosynthesis of Nicotinic Acid | 1           | 1.41351883  |
| 1           | 1                                                                                                                               | 1.231403076 | 1.453188429                                   | 1.400560902 | 1           |
| 1.395697625 | 1.387726058                                                                                                                     | 0.618417506 | 1.820065656                                   | 1           | 2.694807602 |
| 0.166475889 |                                                                                                                                 |             | 0.456596266                                   | 1           | 0.870185643 |
| 0.813534084 | 0.889092613                                                                                                                     | 0.785408799 | 0.820676172                                   | 1           | 1.010178854 |
| 1.251091905 | 1.11291799                                                                                                                      | 0.942741439 | 1.208039864                                   | 1           | 0.6732962   |
| 0.796032182 | 0.58643201                                                                                                                      | 0.877927691 | 2.626872                                      |             |             |
| YJR080C     | YJR080C::YJR080C::molecular_function unknown                                                                                    | 1           | 1.38820318                                    |             |             |
| 1.318860895 | 1.719578532                                                                                                                     | 1.575565621 | 1                                             | 1.610617117 | 1.259155291 |
| 1.37371669  | 1                                                                                                                               | 1.388024759 | 1.403274665                                   | 1.512525078 | 1.590603508 |
| 0.902794547 | 1.133069465                                                                                                                     | 1.167358051 | 1.06310613                                    | 1           | 0.900828078 |
| 1.312128702 | 0.827453002                                                                                                                     | 1.633073124 | 1                                             | 1.164747877 | 1.167983528 |
| 1.457660034 | 1.20900351                                                                                                                      | 1.281008661 | 1                                             | 0.945044118 | 0.839668734 |
| 1.241699194 | 0.842852823                                                                                                                     | 0.598690182 | 1                                             | 0.940147528 | 0.783713835 |
| 0.899614179 | 0.754601235                                                                                                                     | 1.003106186 | 0.684737973                                   |             |             |
| YJR083C     | YJR083C::YJR083C::molecular_function unknown                                                                                    | 1           | 0.941157854                                   |             |             |
| 1.299733424 | 1.114603677                                                                                                                     | 1.447729845 | 1                                             | 1.033570502 | 1.009791287 |
| 1.248118942 | 1                                                                                                                               | 1.193895448 | 1.154384993                                   | 1.415025747 | 1.427187311 |
| 1           | 1.259274049                                                                                                                     | 1.058704416 | 0.906642135                                   | 1           | 2.405827272 |
| 2.459849468 | 1.876859689                                                                                                                     | 1.808758948 | 1                                             | 1.164100234 | 1.143797974 |
| 0.998223827 | 0.855347287                                                                                                                     | 1.288018298 | 1                                             | 0.985879254 | 1.609658108 |
| 1.398830999 | 1.544403706                                                                                                                     | 1.698669824 | 1                                             | 1.01570718  | 1.303547658 |
| 0.960038276 | 0.94260106                                                                                                                      | 0.962364643 | 1.17683864                                    |             |             |
| YJR085C     | YJR085C::YJR085C::molecular_function unknown                                                                                    | 1           | 1.166689492                                   |             |             |
| 1.397149918 | 1.082991034                                                                                                                     | 1.423019789 | 1                                             | 0.950856373 | 0.928599542 |
| 1.532027928 | 1.451248058                                                                                                                     | 1           | 1.169536952                                   | 1.41995194  | 1.555357085 |
| 1           | 1.274379221                                                                                                                     | 1.244377628 | 1.454171244                                   | 1.998539906 | 1           |
| 1.884709932 | 2.71119481                                                                                                                      | 3.420842273 | 2.254911184                                   | 1           | 1.132980692 |
| 1.04374381  | 1.387957441                                                                                                                     | 1.134668445 | 1.235156418                                   | 1           | 0.927434944 |
| 1.565457806 | 1.821569582                                                                                                                     | 1.822132592 | 1.58622374                                    | 1           | 1.123294891 |
| 1.824020275 | 1.38686637                                                                                                                      | 1.392733654 | 1.446335679                                   | 1.261774171 |             |
| YCR021c     | "YCR021c::HSP30::Protein induced by heat shock, ethanol treatment, and entry into stationary phase; located in plasma membrane" |             |                                               |             |             |
| 1.140171761 | 0.797172586                                                                                                                     | 0.778280371 | 0.727647541                                   | 0.670013036 |             |
| 0.848732813 | 2.625866464                                                                                                                     | 2.181012492 | 1.302951101                                   | 1.061224068 |             |
| 2.96246911  | 2.718874647                                                                                                                     | 2.2755412   | 1.556838426                                   | 1           | 17.86821264 |

|         |                                                                                                                                                                                                                                 |             |             |             |             |               |
|---------|---------------------------------------------------------------------------------------------------------------------------------------------------------------------------------------------------------------------------------|-------------|-------------|-------------|-------------|---------------|
|         | 8.744724817                                                                                                                                                                                                                     | 9.575593604 | 3.162607674 | 1           | 3.179737626 | 1.899763124   |
|         | 1.263813897                                                                                                                                                                                                                     | 1.153954182 | 1.225993158 | 1           | 11.52692145 | 2.44907432    |
|         | 2.29387618                                                                                                                                                                                                                      | 1.034659673 | 1.034988868 | 1           | 16.43848151 | 3.380961527   |
|         | 0.679451829                                                                                                                                                                                                                     | 0.303029205 | 1.447546171 | 1.554232579 |             |               |
| YCR023C | YCR023C::YCR023C::not yet annotated                                                                                                                                                                                             |             |             | 1           | 1.030752736 | 0.67981426    |
|         | 0.922916384                                                                                                                                                                                                                     | 0.742937175 | 1           | 0.980388764 | 1.003708603 | 0.699720353   |
|         | 0.741571874                                                                                                                                                                                                                     | 1           | 1.347902269 | 0.862280629 | 0.565920349 | 0.99953892 1  |
|         | 0.566517144                                                                                                                                                                                                                     | 0.710171223 | 0.584773332 | 1           | 1.17036153  | 0.940603938   |
|         | 0.95522826                                                                                                                                                                                                                      | 0.862350596 | 1           | 1.059447041 | 0.940811273 | 1.146320349   |
|         | 1.162064767                                                                                                                                                                                                                     | 1.144889575 | 1           | 0.824213962 | 0.672748512 | 0.866080408   |
|         | 0.596228824                                                                                                                                                                                                                     | 0.407511898 | 1           | 0.865478667 | 0.657399963 | 0.900695134   |
|         | 0.557768978                                                                                                                                                                                                                     | 0.755412256 | 0.767922225 |             |             |               |
| YCR035C | YCR035C::RRP43::Ribosomal RNA Processing                                                                                                                                                                                        |             |             | 1           | 1.294334578 |               |
|         | 1.077996002                                                                                                                                                                                                                     | 0.619446677 | 1           | 0.933330133 | 0.923699423 | 0.999873465   |
|         | 1.11748143                                                                                                                                                                                                                      | 1           | 1.152262177 | 1.104357084 | 0.931686582 | 1.31448671    |
|         | 0.514283052                                                                                                                                                                                                                     | 1           | 1.675645436 |             |             | 1             |
|         | 0.981477843                                                                                                                                                                                                                     | 0.906289324 | 1.472973676 | 1.065700162 | 1.102886652 | 1             |
|         | 1.194005986                                                                                                                                                                                                                     | 0.936724902 | 0.929829792 | 0.958551627 | 1           | 1.75809192    |
|         | 1.331760259                                                                                                                                                                                                                     | 0.816590927 | 0.857858928 | 0.716735692 | 1.098032451 |               |
| YCR037c | YCR037c::PHO87::May collaborate with Pho86p and Pho84p in inorganic phosphate uptake; protein contains 12 predicted transmembrane domains                                                                                       |             |             | 1           |             |               |
|         | 0.848780601                                                                                                                                                                                                                     | 0.708626092 | 1.116436161 | 0.878942774 | 1           | 0.966134181   |
|         | 1.019494484                                                                                                                                                                                                                     | 0.811764519 | 0.70961853  | 1           | 1.068964095 | 0.800945924   |
|         | 0.434975225                                                                                                                                                                                                                     | 0.909458507 |             | 0.546235447 | 1.557911839 | 1.193759492 1 |
|         | 0.459229552                                                                                                                                                                                                                     | 0.334306119 | 0.536902725 | 1           | 0.826250055 | 0.929875812   |
|         | 1.016830667                                                                                                                                                                                                                     | 0.989817236 | 1.141064351 | 1           | 0.940247209 | 0.552927651   |
|         | 0.962810452                                                                                                                                                                                                                     | 0.951837847 | 0.543952824 | 1           | 0.640544365 | 0.458352553   |
|         | 0.735311782                                                                                                                                                                                                                     | 0.728197105 | 0.774927232 |             |             |               |
| YCR039c | "YCR039c::MATALPHA2::Homeobox-domain containing protein which, in haploid cells, acts with MCM1 to repress a-specific genes. In diploid cells alpha2 acts together with a1 to repress transcription of haploid-specific genes." |             |             | 1           |             |               |
|         | 0.64707378                                                                                                                                                                                                                      | 1.026813598 | 0.879670459 | 1.201803027 | 1           |               |
|         | 0.717226172                                                                                                                                                                                                                     | 0.758545053 | 0.916516283 | 1           | 0.886775995 | 1.189072269   |
|         | 0.966952032                                                                                                                                                                                                                     | 0.933845625 | 1           | 1.264082028 | 1.418598991 | 1             |
|         | 1.098008351                                                                                                                                                                                                                     | 0.91188521  | 1.096983387 | 0.6257283   | 1           | 0.982870953   |
|         | 1.243393003                                                                                                                                                                                                                     | 0.700396345 | 0.679887716 | 0.982253477 | 1           | 1.251734134   |
|         | 1.346423312                                                                                                                                                                                                                     | 1.49473337  | 1.705165831 | 1           | 0.892024952 | 0.991964291   |
|         | 1.102393924                                                                                                                                                                                                                     | 1.057689556 | 1.321751372 | 1.369475945 |             |               |
| YJR087W | YJR087W::YJR087W::molecular_function unknown                                                                                                                                                                                    |             |             | 1           | 1.043357375 |               |
|         | 1.096898812                                                                                                                                                                                                                     | 0.893305166 | 1.266886493 | 1           | 0.835630076 | 0.750301627   |
|         | 1.265247054                                                                                                                                                                                                                     | 1.265169779 | 1           | 0.901930604 | 1.183788486 | 1.491528838   |
|         | 1.167410486                                                                                                                                                                                                                     | 1           | 1.293116613 | 1.079025009 | 1.069318094 | 1.34151312 1  |
|         | 1.53309268                                                                                                                                                                                                                      | 2.124478525 | 1.927609933 | 1.1147614   | 1           | 0.862705754   |
|         | 1.027502119                                                                                                                                                                                                                     | 0.705564149 | 0.646351491 | 0.919720398 | 1           | 1.019325617   |
|         | 1.526036278                                                                                                                                                                                                                     | 1.021593278 | 0.878739208 | 1.343534963 | 1           | 1.200741184   |
|         | 1.886797636                                                                                                                                                                                                                     | 1.152616785 | 1.207001308 | 1.261750169 | 1.483307061 |               |
| YCR041W | YCR041W::YCR041W::molecular_function unknown                                                                                                                                                                                    |             |             | 1           | 1.387207751 |               |
|         | 1.458386253                                                                                                                                                                                                                     | 0.892434952 | 1.391862718 | 1           | 0.980310422 | 0.909077262   |
|         | 1.300643983                                                                                                                                                                                                                     | 1.279864492 | 1           | 1.007125186 | 1.108866371 | 1.39451723 1  |
|         | 1.002366742                                                                                                                                                                                                                     | 1.444375575 | 1.446729742 | 1           | 1.03146412  | 2.026885472   |
|         | 1.756288003                                                                                                                                                                                                                     | 0.874978879 | 1           | 0.837773121 | 0.822649588 | 0.595476958   |
|         | 0.770026235                                                                                                                                                                                                                     | 0.868432459 | 1           | 0.884386903 | 0.684385959 | 0.774722642   |
|         | 1.182013168                                                                                                                                                                                                                     | 0.936221812 | 1           | 0.5201538   | 0.433663309 | 0.611988335   |
|         | 0.319486684                                                                                                                                                                                                                     | 0.868581452 | 1.211863567 |             |             |               |
| YJR089W | YJR089W::BIR1::baculoviral IAP repeat-containing protein                                                                                                                                                                        |             |             | 1           |             |               |
|         | 0.811896416                                                                                                                                                                                                                     | 0.881696443 | 0.949953809 | 0.934468259 | 1           | 0.867855383   |
|         | 1.113488744                                                                                                                                                                                                                     | 0.914817039 | 1           | 0.807959029 | 0.964089136 | 0.766345496   |

|             |                                                              |             |             |             |             |                       |
|-------------|--------------------------------------------------------------|-------------|-------------|-------------|-------------|-----------------------|
| 1.132978039 | 1                                                            | 0.943839228 | 1.161234138 | 1.305934597 | 0.982720718 | 1                     |
| 2.401189661 | 5.647260171                                                  | 4.579537326 | 2.420339864 | 1           | 0.832560698 |                       |
| 0.863866436 | 0.741536533                                                  | 0.710749795 | 0.962794384 | 1           | 0.97216815  |                       |
| 1.075449476 | 0.93853195                                                   | 0.928564138 | 1.137263047 | 1           | 1.309187039 |                       |
| 1.527329758 | 1.355075362                                                  | 0.867072173 | 1.183703772 | 0.865116491 |             |                       |
| YCR043C     | YCR043C::YCR043C::molecular_function unknown                 |             |             |             | 1           | 1.479207272           |
| 1.700249457 | 0.96826916                                                   | 1.520894139 | 1           | 1.013131189 | 1.034934718 |                       |
| 1.251415974 | 1.448199649                                                  | 1           | 1.103532666 | 0.885092343 | 1.617516318 |                       |
| 1.111318606 | 1.087076272                                                  |             | 0.648771302 | 1.034224813 | 1           |                       |
| 1.287414919 | 1.006882407                                                  | 0.885558754 | 1           | 0.995803455 | 0.996554951 |                       |
| 0.667546568 | 0.996852685                                                  | 0.939377381 | 1           | 0.928483243 | 1.132284221 |                       |
| 0.899852391 | 0.773451871                                                  | 1.441709186 | 1           | 0.815104885 | 0.967563641 |                       |
| 0.76837117  | 1.098603774                                                  | 1.17489611  | 0.985077    |             |             |                       |
| YJR103W     | YJR103W::URA8::Last step in pyrimidine biosynthesis pathway  |             |             |             | 1           |                       |
| 1.206216128 | 1.276978022                                                  | 0.794976803 | 1           | 1.363924424 | 1.432795973 |                       |
| 1.00468318  | 1.089469818                                                  | 1           | 1.051376303 | 1.209059338 | 1.164113642 |                       |
| 0.971208022 | 1.468127749                                                  | 1.278962345 | 1.60541506  | 1.446280576 | 1           |                       |
| 1.1906622   | 1.29563538                                                   | 1.234023114 | 0.703680435 | 1           | 1.09560517  |                       |
| 1.014042196 | 1.29407886                                                   | 1.434257601 | 1.062854774 | 1           | 1.152923503 |                       |
| 1.066211785 | 1.014547478                                                  | 1.223452301 | 0.609271776 | 1           | 0.848790398 |                       |
| 0.690694565 | 0.905307934                                                  | 0.789438595 | 0.884769367 | 1.077017537 |             |                       |
| YCR045C     | YCR045C::YCR045C::molecular_function unknown                 |             |             |             | 1           | 0.764599221           |
| 0.635880097 | 0.71469143                                                   | 0.562304375 | 1           | 0.798546713 | 0.695661863 |                       |
| 0.78516199  | 0.828034871                                                  | 1           | 0.818883192 | 0.726887189 | 0.732456659 |                       |
| 0.816035073 | 1.146502151                                                  |             | 1.091128265 | 0.868468573 |             |                       |
| 0.724605914 | 0.661501937                                                  | 0.428330789 |             |             |             | 1                     |
| 0.85879073  | 0.874076791                                                  | 0.760990498 | 0.780201304 | 0.928758889 |             |                       |
|             | 0.886131457                                                  |             |             |             |             |                       |
| YJR105W     | YJR105W::ADO1::adenosine kinase                              |             |             |             | 1           | 1.14097917 0.84333953 |
| 0.832421506 | 0.55121945                                                   | 1           | 0.979310098 | 0.869461548 | 0.760611937 |                       |
| 0.862085944 | 1.024420988                                                  | 0.81401424  | 0.741482756 | 0.625804463 | 1           |                       |
| 0.896307869 | 0.747484366                                                  | 0.746331398 | 0.900730843 | 1           | 1.056110244 |                       |
| 0.856049809 | 0.669660475                                                  | 0.904107572 | 1           | 1.271670083 | 0.949884873 |                       |
| 1.421756307 | 1.45706869                                                   | 0.960967297 | 1           | 1.1219542   | 0.806663371 |                       |
| 0.816251664 | 0.651723323                                                  | 0.515365165 | 1           | 0.919827231 | 0.598659056 |                       |
| 0.889660354 | 0.628138672                                                  | 0.538678162 | 0.830091564 |             |             |                       |
| YCR059C     | YCR059C::YIH1::piecemeal microautophagy of the nucleus (PMN) |             |             |             |             |                       |
| 1.184498109 | 0.982799906                                                  | 0.75027597  | 0.735205706 | 0.937103459 |             |                       |
| 0.769965755 | 0.814040088                                                  | 1.240595381 | 0.956176151 | 0.918492892 |             |                       |
| 0.825287722 | 1.0737034771                                                 | 0.627498082 | 0.604526621 | 1           |             |                       |
| 0.915229645 | 0.836683442                                                  | 0.735422497 | 0.992149095 | 1           | 0.955694252 |                       |
| 0.954133004 | 1.096211531                                                  | 1.128635944 | 0.898781143 | 1.067331771 |             |                       |
| 1.072726493 | 1.321827574                                                  | 1.008043187 | 1           | 0.853598237 | 0.630488286 |                       |
| 0.91907731  | 0.457932611                                                  | 0.839717661 | 0.907146476 |             |             |                       |
| YJR107W     | YJR107W::YJR107W::molecular_function unknown                 |             |             |             | 1           | 1.011682685           |
| 1.024644191 | 0.905986033                                                  | 1.033730376 | 1           | 0.865763193 | 0.932862363 |                       |
| 1.003512194 | 1.045256326                                                  | 1           | 1.075932555 | 0.942209043 | 1.154079114 |                       |
| 0.937384882 | 1.0891772248                                                 | 0.891960416 | 1.160731624 | 1.068787989 | 1           |                       |
| 0.913699503 | 1.249170042                                                  | 1.213959128 | 0.955628695 | 1           | 1.345051263 |                       |
| 1.534044484 | 1.644414232                                                  | 1.685263444 | 1.215478153 | 1           | 0.902627615 |                       |
| 1.163443641 | 1.1702583                                                    | 1.048399732 | 1.050447988 | 1           | 0.946004249 |                       |
| 1.196759288 | 0.922758227                                                  | 1.107790078 | 1.041113367 | 1.469297049 |             |                       |
| YCR061W     | YCR061W::YCR061W::molecular_function unknown                 |             |             |             |             | 1.037974935           |
| 0.95319068  | 1.347365978                                                  | 0.543327802 | 1.115080493 | 1.345517976 |             |                       |
| 0.816518109 | 1.809653688                                                  | 2.039278348 | 1.789074567 | 0.969199119 | 1           |                       |
| 1.130098287 | 1.533548947                                                  | 0.831680087 |             |             |             | 1                     |
| 0.707774652 | 0.816662562                                                  | 0.954454071 | 0.680112028 | 1           | 0.634547205 |                       |

0.449517762 0.793871413 1.023536726 0.562843044 1 0.799219764  
 0.655736626 0.950855272 0.148767013 1.398025985 0.575284973  
 YJR109C YJR109C::CPA2::carbaryl phosphate synthetase 1 1.690667516  
 1.320135905 1.084329662 0.471334736 1 1.379847372 1.419145172  
 0.700035691 0.626792474 1 5.772849518 3.793025276 0.465615028  
 0.529664883 1 1.279765931 0.988101529 0.314756249 0.154332827 1  
 1.6570511 1.18101454 0.376458398 0.466609664 1 0.977114096  
 0.857469743 1.051024455 1.11591016 0.782663609 1 2.056404001  
 0.82539031 1.399357897 1.294787662 0.557649483 1 1.923892246  
 0.831982036 1.888775265 0.920172613 0.668274111 2.538433914  
 YJR111C YJR111C::YJR111C::molecular\_function unknown 1 1.301610686  
 1.309613327 1.085418783 1.164902736 1 1.303409455 1.422039704  
 1.085900998 1.311129641 1 2.313349837 1.025616393 0.979161011  
 0.895365499 1 0.57066104 0.376077174 0.326995391 0.5085393 1  
 1.104361153 1.332040149 0.515431427 1 0.942348182 0.842313785  
 0.916664406 0.956870772 0.913314245 1 1.239130358 1.041739253  
 1.012063183 0.96255278 0.954075955 1 1.089730359 1.11156071  
 1.036247605 1.302169637 0.752938492 2.164542426  
 YJR113C YJR113C::RSM7::mitochondrial ribosome small subunit component 1  
 1.243799724 1.513206745 1.083170198 1.05864897 1 1.348471028  
 1.384085179 1.449982036 1.481080574 1 1.322497177 1.356129797  
 1.866005468 1.176582409 1 0.871537395 0.603816459 0.662617833  
 1.299415279 1 1.493933454 1.494036679 0.99193915 1.187337933 1  
 1.091045403 1.020479501 1.475954602 1.356063116 0.98107683 1  
 1.372705971 1.128380008 0.932220611 0.892192733 0.911999443 1  
 1.382002246 1.01046297 0.879332912 1.100093487 0.791169524 0.992957567  
 YJR127C YJR127C::ZMS1::Product of gene unknown 1 1.241826655  
 1.266505245 0.972442275 1.061083195 1 1.265261876 1.202146022  
 1.069681036 1.014870226 1 1.406077582 1.381698651 1.450863479  
 0.940131983 1 1.207608406 1.537552085 1.318779976 1  
 0.848378697 1.391164418 1.067573871 0.789085128 1 0.838034064  
 0.847366441 0.692490711 0.744148159 0.907424678 1 1.052439583  
 1.302692355 0.870099519 0.90404879 1.640963232 1 1.079659072  
 1.224586165 1.086448008 1.436000832 1.259361915 0.605056171  
 YJR129C YJR129C::YJR129C::molecular\_function unknown 1 0.980942551  
 0.900699808 0.923638715 1 0.89167213 0.835201889  
 1.0811183 1 0.813345792 0.601029595 1.047188705 1  
 0.685020103 0.327267411 0.895758127 1 0.929235903  
 0.639563313 1 1.236657207 1.265093529 1.375213201 1.518968949  
 1.036855422 1 1.008177619 0.999925627 0.744295387 1.323719049  
 0.905753909 1 0.579358027 0.603788321 0.72622913 0.86507662  
 0.586501466 2.02531828  
 YCR063W YCR063W::BUD31 1 0.939141737 0.869739282 1.191328909  
 0.551059716 1 1.129472709 1.370206302 0.672425464 0.587128807 1  
 1.59583635 1.639668086 0.660095532 1.032410623 1  
 2.720785375 0.88051703 1 1.2945043 1.824404618 1.723917715  
 1.166055874 1 0.931591423 1.535280025 1.401497273 0.934969786  
 0.894601009 1 1.136433027 0.705113806 1.918576928 1.168336364  
 0.599459772 1 1.522234837 0.888749165 1.32213261 0.465282134  
 2.052726058 0.648837381  
 YCR065w YCR065w::HCM1::Dosage-dependent suppressor of cmd1-1 mutation; shows  
 homology to fork head family of DNA-binding proteins 0.935778108  
 0.793756176 0.815481181 0.944367805 1.014904995  
 0.942898758 0.900607079 0.911752042 0.82267046 1.490021214 1  
 0.507206168 1 1 0.722412258  
 0.662574992 1.071737037 1.061380203 0.720499949 1 0.918471731

0.836171812 1.20053643 1.355697013 0.487051837 0.896521735  
 0.810321891 1.18032618 0.881732321 0.907026792 0.689991701  
 YCR067c "YCR067c::SED4::Sed4p is an integral ER membrane protein, which,  
 along along with its close homolog, Sec12p, is involved in vesicle formation at  
 the ER" 1 1.122708575 1.085004966 1.028428983 1 1.069549762  
 1.066460191 0.939592704 1 1.479004837 1.444261611 1.814835843  
 1.04069342 1 2.050831402 2.756057594 2.428709251 1.25259409 1  
 0.794755899 2.383865072 1.233182076 0.608201691 1 0.90533468  
 1.004597404 0.850218112 0.826200608 0.804311625 1 1.052388459  
 1.706153484 1.227395756 0.809818272 0.994766775 1 1.142593207  
 1.729294222 1.213418574 1.308718417 1.365256776 0.811703436  
 YCR069w YCR069w::CPR4::cyclophilin homolog 1 1.075560496 0.984648503  
 1.015300366 0.837724378 1 1.075116045 1.096356346 0.788803817  
 0.798297664 1 1.515999596 1.377086459 1.35496122 0.996792574 1  
 1.421474636 1.192382219 1.33108548 0.809878332 1 0.825171316  
 0.422015713 0.416811131 0.52694811 1.204030295 1.078710019  
 1.203298251 1.042990512 1 0.957062976 0.842670674 1.201566004  
 1.375402132 0.508231051 1 1.115379298 0.722619463 0.986180729  
 0.459057969 1.155821308 0.818708442  
 YCR084c YCR084c::TUP1::general repressor of transcription (with Cyc8p);  
 mediates glucose repression 1 1.243154088 0.993110882 0.640032288 1  
 1.237426367 1.208957086 0.715204908 1 1.466688658 1.280180407  
 0.554857894 1.083621109 1 0.771019927 0.352748996 0.703324676  
 0.663357626 1 0.607185379 0.656012276 0.550142468 0.778449186 1  
 0.780004924 0.70873668 0.93910207 0.883534587 0.783035206 1  
 0.711693003 0.602991752 0.682946949 0.670870082 0.413480863 1  
 0.642620097 0.568783489 0.993695711 0.556460802 0.695527916 0.880877781  
 YJR131W YJR131W::MNS1::specific alpha-mannosidase 1 0.906198442  
 0.818794871 0.804795484 0.800637667 1 0.910702744 1.016204985  
 0.788923384 0.686073575 1 0.979493679 0.93692321 0.632619189  
 0.882307155 1 0.897735231 0.452531183 0.953897584 0.926532862 1  
 0.873988692 1.278094259 1.169735179 0.968583189 1 1.088697708  
 1.128869864 1.515514691 1.127961453 1 1.034185768 0.869705061  
 0.993185311 0.998236067 0.492988184 1 0.973007421 0.75839329  
 1.252725757 0.900973227 0.875327778 0.984201335  
 YCR086W YCR086W::CSM1::Chromosome segregation in meiosis  
 0.699371039 0.958884765 0.641815805 0.670743336 0.696374192  
 1.221631548 1.173357655 0.742669308 0.863097056 1.152206078  
 1.10234166 1 1.045982786 1.03584205 1.308630214 1  
 1.310119874 1.899742929 1.629114308 1.286303438 1.277071011  
 1.237018927 0.931520563 1.080308439 1 1.011095657 1.348204893  
 1.202026378 1.361948224 1.502355237 1 0.898065843 1.17218304  
 1.352152506 1.507859269 1.160201842  
 YJR133W YJR133W::XPT1::Xanthine Phosphoribosyl Transferase 1  
 0.962248875 1.089874034 0.952100136 1.263171758 1 1.063822319  
 1.023634173 1.342788382 1.339822481 1 0.806159982 0.829919405  
 1.115901689 0.988055756 1 1.081399127 0.585134956 0.712671202  
 1.290315507 1 1.447584201 1.21848116 1.063781292 1.296068009 1  
 1.075731507 1.054654984 0.979440603 1.058916217 0.971661994 1  
 1.028730842 1.03949419 0.667509189 0.831295538 1.37821532 1  
 1.035165714 0.962830447 0.885453997 1.238740249 1.211227723 1.016599476  
 YCR088w YCR088w::ABP1::Actin binding protein 1 0.739340415  
 0.841560301 0.291912617 1 0.917005739 0.993800947 0.400511989  
 0.43455627 1 0.865432117 1.070318742 1.004676563 0.583837161 1  
 1.366217562 1.547777709 1.824399226 1.065528069 1 0.74411135  
 0.903139112 0.8683858 1.039792523 1 1.083576943 1.015690003  
 1.253406041 0.961290542 0.880745124 1 0.669028046 0.917555292

0.923796544 1.189086235 0.669786107 1 0.909698242 0.790718506  
 1.235888381 0.460353326 1.247522243 0.912400256  
 YJR135C YJR135C::MCM22::Required for maintenance of chromosomes and  
 minichromosomes 1 1.183684916 1.266295164 1.052128205 1.512002254 1  
 1.037795117 0.89547829 1.461293357 1.478734411 1 0.771316022  
 0.935383423 1.05987562 1.13624192 1 0.82965449 0.890393708  
 0.762696224 1.593751418 1 1.176689458 1.732288477 2.362997174  
 1.101588685 1 0.894269292 1.244665106 0.939577561 1.067085254  
 0.915061086 1 0.922145099 1.297195245 0.907868132 1.228028222  
 1.658869218 1 0.975600605 1.079026219 1.216445261 1.125493105  
 1.537474131 1.055126958  
 YCR090C YCR090C::YCR090C::molecular\_function unknown 0.860669614  
 0.93724723 0.696604987 1.122877399 0.673164761 0.684292014  
 1.209706724 0.973874453 0.743874924 0.836654156 1.030675246  
 0.886964052 1 0.901781256 0.580724166 0.691630443 1.052794174 1  
 1.773822705 1.737034436 1.984843488 1.374990931 1 0.961188307  
 0.980907181 0.627394027 0.772195739 0.896409951 1 0.921214039  
 1.537690546 0.986112811 0.804268201 1.563559121 1 1.215185824  
 1.440753881 0.835729312 1.494982472 1.411688811 1.507824531  
 YJR137C YJR137C::ECM17::ExtraCellular Mutant 1 1.14083979  
 1.145769737 1.430143971 0.952409252 1 1.152274423 1.224555733  
 0.998133119 1.056918165 1 1.183850668 1.368831943 0.809690847  
 1.271876784 1 1.12548307 0.516746137 0.933995055 0.854047119 1  
 0.763504441 0.458053728 0.580196894 0.615918771 1 0.731685744  
 0.600221457 0.693091017 1.018211176 1 0.57332008  
 0.37927416 0.750973371 0.409353683 1 0.590369373 0.501564642  
 0.679953921 0.846795269 0.774671301 1.634789994  
 YCR092c "YCR092c::MSH3::acts in mismatch repair in mitosis and meiosis but  
 to a lesser extent than MSH2, required for microsatellite stability"  
 0.928390408 1.003298638 0.922470437 0.91729393 0.839034527  
 0.86662337 0.77191323 0.871671924 0.923386968 1.271399877  
 0.957451228 1 1.280497804 1.131316861 0.87116211 1  
 1.786692249 1.946696344 1.41388847 1 0.890485117 0.900088854  
 1.122181957 1 0.81731766 0.700176219 0.914548636  
 0.830926111 1 0.889526814 0.67419773 1.071213038 0.595454754  
 0.995894099 1.108540012  
 YJR151C YJR151C::DAN4::Delayed Anaerobic Gene 1 0.783631628  
 0.838597469 0.89578919 0.739673973 1 0.983512537 0.934403877 0.817836  
 0.787566346 1 1.207828956 1.030045441 0.840882543 0.912674587 1  
 0.906390463 0.780895761 0.802942336 1.009501356 1 0.895015969  
 1.256362758 1.218975504 0.786386227 0.621484729  
 0.978117274 1  
 YJR151C YJR151C::DAN4::Delayed Anaerobic Gene  
 1 1.083912331 0.988002477  
 1.233867187 1.299942025 1.279927891 1 0.929577787 0.757548877  
 0.773866006 1.025297957 0.567923849 1 0.602439237 0.606677817  
 0.706657465 0.648228414 0.650644665 0.627822415  
 YCR094W YCR094W::CDC50::cell division cycle mutant 1 0.882910805  
 0.866559291 0.926903501 0.667803894 1 0.887678115 0.895770617  
 0.768667799 1 0.920637821 0.92226017 0.603606764 0.982445497 1  
 1.135866413 1.48990189 0.76384985 0.755049714 1 0.659919358  
 0.978009786 1.379385117 1 0.828899901 0.813263357 1.220158452  
 1.053213706 0.945493067 1 0.870163075 0.92454753 0.980124289  
 1.105589445 0.668318082 1 1.052493292 1.106036654 1.320646658  
 0.812735806 1.109421204 0.844977137



YJR153W YJR153W::PGU1::Endo-polygalacturonase 1 1.078170261  
0.832332453 1.125276935 1 1.033610527 1.142008242  
0.90883326 1 1.073688507 0.915976083 0.689001258 1.044501035 1  
0.809189709 0.7421863 1.056996577 0.660151688 1 0.453940051  
1.023088275 0.501745653 0.430829321 1 0.867312091 0.918809131  
1.151710232 1.297957574 0.972030589 1 0.633033427 0.718346068  
1.029827444 0.508427459 1 0.818876671 0.619913156 0.795031548  
0.870774547 0.587393072 1.543725122  
YJR155W YJR155W::AAD10::high degree of similarity with the AAD of P.  
chrysosporium 1 1.020331511 0.996352613 0.896852108 0.88704946 1  
0.864764566 0.938124987 1.019873723 1.182832637 1 2.615422636  
2.718736438 1.838121427 1.029632072 1 2.878718138 3.235682219  
4.247314913 2.53270194 1 2.96624303 2.692035355 2.897430743  
2.049371734 1 1.216576489 1.871914188 1.771382732 1.082836226  
1.070349007 1 0.76946811 1.440245572 1.384457833 1.269252043  
0.502806342 1 2.45301302 3.408214881 2.430452874 1.550414244  
1.217395144  
YJR157W YJR157W::YJR157W::molecular\_function unknown 1  
1 2.628034526 1 1  
1.640977647 2.996318601 1.933138168 1.839177522 1 0.678646358  
2.060722329 1.256845088 0.797286141 1 0.874129441  
0.944412204 1 0.965862401 1.366343156  
0.618190518  
YJR159W YJR159W::SOR1::sorbitol-induced sorbitol dehydrogenase 1  
1.818823226 1.951029075 1.660491784 1.690653989 1 1.713238608  
2.249113508 1.900930655 1 1.690812943 2.251064919 1.748456873  
0.585420372 0.81768855 0.635388155 1  
0.780261016 0.8790262 1.136383545 0.77164214 0.894589663 1  
1.825445472 1.369355427 1.262475719 0.889151854 1 0.977410382  
1.212484176 1.067437818 1.134206483 1.398371531  
YJR161C "YJR161C::COS5::Protein with similarity to members of the  
Ybr302p/Ycr007p/Cos8p/Cos9p family, coded from subtelomeric region" 1  
1.38528151 1.076194376 1.242199574 1.17514097 1 1.308007168  
1.340457359 1.114900765 1.207345662 1 1.171967762 1.171331885  
1.111182739 1.114102514 1 1.395513753 1.063607807 1.458606681  
2.452514342 1 1.773487195 1.127965937 1.328807116 1.892512486 1  
1.150401644 0.937226049 1.443870592 1.294558409 1.305703575 1  
0.954447582 0.894488359 0.714494391 0.712200661 1 1.25877103  
1.045816102 1.051309419 1.299705641 1.053898841 1.435147787  
YCR107W YCR107W::AAD3::high degree of similarity with the AAD of P.  
chrysosporium 0.869288586 0.761869276 0.896753077 0.666677883  
0.822084336 0.716145075 0.830147441 2.131557384 2.190532012  
1.153374629 0.878153147 1 3.565633203 3.385048948 1  
2.207917441 2.69893436 1.338068544 1.020287327 1.311571381  
0.797943778 0.702344074 1 1.414435619 2.245899809 3.214077574  
0.943914196 1 1.376040001 1.795774861 1.681766276 0.468222901  
1.057966343 0.856360259  
YCRX02C YCRX02C 1 1.050139542 1.01217034 1.01833549 0.75193664 1  
1.065213787 1.18331065 0.721644925 0.75269551 1 1.324108763  
1.306206182 0.993149054 0.812498823 1 1.503834402 0.623772954  
2.055298722 0.875213144 1 0.839961969 0.882000765 0.782332741  
1.024569523 1 1.174964546 1.188013428 0.909754337 0.993221647  
0.841036512 1 0.955299366 0.89342369 1.119061034 0.760341119  
0.864321609 1 1.089599663 1.086368526 0.907435043 1.03409661  
1.0605592 1.127803701  
YCRX04W YCRX04W 1.129090174 0.912193217 1.024221746 1.164973166  
0.868091985 0.705161265 0.997709968 1.077952626 0.851176156

|             |                                                                                                                                                 |             |             |             |             |             |   |
|-------------|-------------------------------------------------------------------------------------------------------------------------------------------------|-------------|-------------|-------------|-------------|-------------|---|
| 0.745690467 | 0.746713672                                                                                                                                     | 0.995631774 | 1           | 0.581266228 | 0.629484778 |             |   |
| 1.02292256  | 1                                                                                                                                               | 1.034489665 | 1.762763837 | 1.499315398 | 0.76136851  | 1           |   |
| 0.929768681 | 0.824158678                                                                                                                                     | 0.703550717 | 0.969718109 | 0.961623003 | 1           |             |   |
| 0.783556284 | 0.806017969                                                                                                                                     | 0.635971313 | 0.686053074 | 1.133551283 | 1           |             |   |
| 0.744545657 | 0.963032799                                                                                                                                     | 0.91893088  | 0.926559667 | 1.016599476 |             |             |   |
| YCRX06W     | YCRX06W                                                                                                                                         | 1.095845412 | 0.888278007 | 0.63045603  |             |             |   |
| 0.922574765 |                                                                                                                                                 | 0.856166947 | 1.133294077 | 1.020696877 |             |             |   |
| 0.938358467 | 0.970178096                                                                                                                                     | 1           | 4.528392664 | 0.831314915 | 0.840268131 | 1           |   |
| 0.928255912 | 1.187126986                                                                                                                                     |             | 0.68355986  | 0.98604953  | 0.847689325 |             |   |
| 1.144699374 | 1.228426146                                                                                                                                     | 1.074567281 | 1           | 0.744272994 | 0.558463907 |             |   |
| 0.684258838 | 0.761246608                                                                                                                                     | 0.539119754 | 1           | 0.681129993 | 0.768047001 |             |   |
| 0.533611555 | 0.776914565                                                                                                                                     | 0.875624    |             |             |             |             |   |
| YCRX08W     | YCRX08W                                                                                                                                         | 1.546496524 | 0.986216384 | 0.605002814 |             |             |   |
| 1.153823795 | 1.14671084                                                                                                                                      |             | 0.807844964 | 1.661360921 | 1.376089816 |             |   |
| 1.34034515  | 0.988778881                                                                                                                                     | 1           | 0.522221388 | 0.637681049 | 1           |             |   |
| 0.638469358 |                                                                                                                                                 | 0.639131691 | 1           | 0.854090832 | 0.771497689 |             |   |
| 1.152108476 | 1.204212042                                                                                                                                     | 0.872922521 | 1           | 0.753159027 | 0.839175841 |             |   |
| 0.937521801 | 0.861013398                                                                                                                                     | 0.6424074   | 1           | 0.904285866 | 0.828085964 |             |   |
| 0.972413485 | 0.587653644                                                                                                                                     | 1.133877677 | 0.827464674 |             |             |             |   |
| YKL012W     | YKL012W::PRP40::Splicing component that associates with the yeast U1 small nuclear ribonucleoprotein particle                                   | 1           | 0.882044529 | 1.188089396 |             |             |   |
| 1.225904864 | 1.162276532                                                                                                                                     | 1           | 1.147373057 | 1.112200831 | 1.305684707 |             |   |
| 1.115700158 | 1                                                                                                                                               | 1.153926495 | 1.37061151  | 1.034325043 | 1.291701481 | 1           |   |
| 1.016655997 |                                                                                                                                                 | 1.048897611 | 1.502290684 | 1           | 1.132259516 | 1.448771495 |   |
| 1.668592788 | 1.086279654                                                                                                                                     | 1           | 0.822292923 | 1.045034163 | 0.882337177 |             |   |
| 0.746398608 | 1.1271623                                                                                                                                       | 1           | 1.144654198 | 1.136251582 | 0.928854701 |             |   |
| 1.197065671 | 1.041659914                                                                                                                                     | 1           | 1.11449333  | 1.232223597 | 1.194684477 |             |   |
| 1.362492211 | 1.427903771                                                                                                                                     | 1.047246286 |             |             |             |             |   |
| YCRX10W     | YCRX10W                                                                                                                                         | 1           | 1.319989583 | 1.392371858 | 1.093065457 | 1.222399687 | 1 |
| 1.039354166 | 1.018102535                                                                                                                                     | 1.322471393 | 1.24346577  | 1           | 1.584657614 |             |   |
| 1.423549082 | 2.567897827                                                                                                                                     | 1.097769521 | 1           | 1.102198051 | 1.171373573 |             |   |
| 1.771053105 | 1.527715324                                                                                                                                     | 1           | 1.080638453 | 2.342746855 | 2.065296402 |             |   |
| 0.778069509 | 1                                                                                                                                               | 1.416887859 | 1.330873843 | 0.950431065 | 1.017866531 |             |   |
| 0.776928457 | 1                                                                                                                                               | 1.115022401 | 1.821587113 | 1.211472769 | 0.957582118 |             |   |
| 1.635291405 | 1                                                                                                                                               | 1.2068912   | 1.838652936 | 1.037798657 | 0.900396259 |             |   |
| 1.545258179 | 1.074390646                                                                                                                                     |             |             |             |             |             |   |
| YKL014C     | YKL014C::YKL014C::molecular_function unknown                                                                                                    | 1           | 1.400186046 |             |             |             |   |
| 1.085505084 | 1.153791335                                                                                                                                     | 0.989561656 | 1           | 1.390226068 | 1.286789451 |             |   |
| 0.979149553 | 1                                                                                                                                               | 1.377693216 | 1.007028456 | 0.727894812 | 1.076387282 |             |   |
| 0.946538135 |                                                                                                                                                 | 0.977837624 | 0.505248461 |             |             | 1           |   |
| 1.18171124  | 1.090323146                                                                                                                                     | 1.276639897 | 1.399531661 | 1.139125009 | 1           |             |   |
| 1.092052498 |                                                                                                                                                 | 0.800753284 | 1.368825032 | 1.167052193 | 1           | 0.966311779 |   |
| 1.14740338  | 0.729122056                                                                                                                                     | 1.128195281 | 0.698168542 |             |             |             |   |
| YDL003W     | YDL003W::MCD1::Mitotic Chromosome Determinant; similar to S. pombe RAD21; may function in chromosome morphogenesis from S phase through mitosis | 1           |             |             |             |             |   |
| 0.691041996 | 0.942706992                                                                                                                                     | 1.116750296 | 1.005273656 | 1           | 0.874231031 |             |   |
| 0.848701011 |                                                                                                                                                 | 0.93229026  | 1           | 0.572231549 | 0.6554894   | 0.475780231 |   |
| 1.793673835 | 1                                                                                                                                               | 0.624720092 | 0.332811687 | 0.974651575 | 1           |             |   |
| 0.470933511 | 0.527364258                                                                                                                                     | 1.583831642 | 1           | 0.780272492 | 0.976522673 |             |   |
| 1.002434388 | 0.658836303                                                                                                                                     | 1.135886823 | 1           | 1.076642089 | 1.090966504 |             |   |
| 1.299758603 | 1.261088433                                                                                                                                     | 0.682393374 | 1           | 1.22912367  | 1.221950665 |             |   |
| 1.587072738 | 1.159964245                                                                                                                                     | 1.363095394 | 1.01222136  |             |             |             |   |
| YKL016C     | YKL016C::ATP7::ATP synthase d subunit                                                                                                           | 1           | 0.874502141 |             |             |             |   |
| 1.245049002 | 0.919067284                                                                                                                                     | 1.665142004 | 1           | 1.006207654 | 0.985466029 |             |   |
| 1.388156294 | 1.299516426                                                                                                                                     | 1           | 0.754571936 | 0.904366083 | 1.328195222 |             |   |
| 1.072543041 | 1                                                                                                                                               | 1.431056572 | 1.03076924  | 1.087181444 | 2.545167435 | 1           |   |
| 1.810148356 | 1.753674728                                                                                                                                     | 2.029789033 | 1.993930468 | 1           | 1.023924504 |             |   |

0.982799316 0.731813911 0.834322697 0.92508184 1 0.871414117  
 0.919357944 0.641015018 0.657728348 1.458970678 1 1.061726747  
 0.830329794 0.764165576 1.898492419 1.692573026 1.61202375  
 YDL005c YDL005c::MED2::RNA Polymerase II transcriptional regulation mediator  
 1 1.003132789 1.012143367 1.112429926 1.031320131 1 1.005120583  
 0.876641967 1.07800007 0.976566001 1 0.882275881 0.900309535  
 0.948011406 1 0.769276531 1.089969148 0.897862513 1  
 0.888180126 0.844264547 0.942152165 0.94262225 1 0.977521419  
 0.908252388 0.57691463 0.564978584 0.912145247 1 1.229742454  
 1.473294941 1.302155141 1.325717825 1.394292307 1 1.119062304  
 0.877726147 1.045867739 0.548703313 1.036859601 0.892260903  
 YKL018W YKL018W::SWD2::member of Set1p complex 1 0.940774442  
 0.959068675 0.817307313 0.910884254 1 0.889091415 0.847619616  
 1.030358881 0.84570753 1 0.866925737 0.858442245 0.823407935  
 0.862698174 1 0.942426976 1.109592979 1.114957513 1  
 1.047830139 0.973777603 0.720819727 0.89280776 1 1.074177207  
 1.237178159 1.115794826 1.099707345 1.020583334 1 0.882130523  
 0.941401913 0.672983069 0.72626072 1.027114741 1 0.981526618  
 0.946059651 0.995338822 1.212244937 0.920660374 0.837096518  
 YDL007W YDL007W::RPT2::Probable 26S protease subunit and member of  
 CDC48/PAS1/SEC18 family of ATPases 1 0.631451608 0.806365528 0.957803156  
 0.722444449 1 0.740791999 0.771577667 0.851542232 0.813662248 1  
 0.724159379 1.049306666 1.065397036 0.904445764 1 0.941103705  
 1.118487385 1.082645886 1.273919528 1 1.454878828 1.205626159  
 2.083440273 1.468247607 1 0.923059341 1.315751154 1.052460483  
 0.691592204 0.952020197 1 1.3324931 1.689920048 1.592472646  
 0.991886719 0.978702981 1 1.24182321 1.325954986 1.042633736  
 0.877744706 1.055711612 1.092778775  
 YKL020C YKL020C::SPT23::Dosage dependent suppressor of Ty-induced promoter  
 mutations 1 1.678652694 1.621025663 1.929503689 1.526285658 1  
 1.835643483 1.721889262 1 1.47806662  
 1.437225703 1  
 1.03933212 0.815594607 1.154766215 0.879985377 1.086816452 1  
 1.092404668 0.965279461 0.994042132 1.135405778 1 0.748198851  
 1.129962199 0.902921952 1.00201405 1.469297049  
 YDL009c YDL009c::YDL009C::molecular\_function unknown 0.586092626  
 0.9805223 0.606035127 1.226648178 0.572674332 0.541502327  
 0.874752319 0.711322848 0.781652887 1.352030798 0.882069111  
 0.458842989 0.408844275 1 1.578035086 2.622604009  
 2.734540858 1.662102251 1 0.866492729 1.160603018 0.467143363  
 1.003257647 1 1.105854915 2.307950256 2.466107956 2.07615023  
 2.294765994 1 1.271604275 2.133212556 1.487164015 1.182732071  
 1.595129902 1.700461836  
 YKL022C "YKL022C::CDC16::a component of anaphase-promoting complex required  
 for the G2/M transition in mitosis and degradation of mitotic cyclins, required  
 for sporulation" 1 1.029473088 0.990537034 0.999034659 0.992378047 1  
 1.021105471 1.021391388 1.012474997 0.965977961 1 0.963002418  
 1.01825727 0.907852514 1.005772948 1 0.928630872 0.374437498  
 0.679121209 1.028253415 1 1.00178319 1.347577382 1.026039116  
 0.783106795 1 1.008982438 0.823804631 1.038220224 1.047308122  
 1.011594021 1 1.283288178 1.097872191 1.143031302 1.054563269 1  
 0.710376269 1.034010382 1.003420957 0.727396951 0.849355305  
 YKL036C YKL036C::YKL036C::molecular\_function unknown 1 1.052446001  
 1.17546368 1.649372829 0.86593688 1 1.651092945 1.937434756  
 1.14625792 1.026968113 1 1.266287123 1.683518654 1.151687002  
 1.172778851 1 1.295708564 0.867946811 1.780686328 1.24872552 1  
 1.108911639 0.966316615 0.768225593 0.812871976 1 1.012799977

|         |                                                                                                             |             |             |             |             |             |
|---------|-------------------------------------------------------------------------------------------------------------|-------------|-------------|-------------|-------------|-------------|
|         | 1.078028972                                                                                                 | 1.31528711  | 1.443078941 | 1.620555384 | 1           | 0.984660981 |
|         | 0.471334131                                                                                                 | 0.760082459 | 0.672508787 | 0.370308949 | 1           | 1.141676128 |
|         | 0.569538806                                                                                                 | 1.266953681 | 0.906573595 | 1.338046552 | 0.506986293 |             |
| YKL038W | YKL038W::RGT1::transcriptional repressor and activator                                                      |             |             |             |             | 1           |
|         | 0.988593039                                                                                                 | 0.941272217 | 1.004464992 | 0.56229175  | 1           | 1.156538891 |
|         | 1.243485847                                                                                                 | 0.701865074 | 0.624873065 | 1           | 1.365959972 | 1.411378137 |
|         | 0.870706391                                                                                                 | 0.798024842 | 1           | 1.027855369 | 0.61125142  | 0.623654527 |
|         | 0.750111941                                                                                                 | 1           | 0.944878058 | 0.631363532 | 0.428689936 | 0.71853386  |
|         | 0.859013081                                                                                                 | 0.802111584 | 1.171955403 | 0.959156675 | 0.847268243 | 1           |
|         | 0.674874279                                                                                                 | 0.692974458 | 1.311326064 | 0.435533959 | 1           | 0.798767261 |
|         | 0.614514162                                                                                                 | 0.677430552 | 0.65197489  | 0.624448919 | 1.306430994 |             |
| YKL040C | YKL040C::NFU1::Nifu-like protein                                                                            |             |             |             |             | 1           |
|         | 0.974768325                                                                                                 | 1.27601359  | 1           | 0.913479498 | 0.909728079 | 1.272030313 |
|         | 1.092133053                                                                                                 | 1           | 2.322192279 | 2.491300106 | 1.574004762 | 1.515149167 |
|         | 3.473025986                                                                                                 | 2.204442573 | 2.212542326 | 1.856944206 | 1           | 3.436725525 |
|         | 1.845960807                                                                                                 | 2.312725464 | 1.43805469  | 1           | 2.407443146 | 1.782233928 |
|         | 1.165318186                                                                                                 | 1.599801424 | 1.390028322 | 1           | 1.964151383 | 1.492077199 |
|         | 0.784040518                                                                                                 | 1.347788994 | 2.671313563 | 1           | 2.116277693 | 1.521970993 |
|         | 1.943682194                                                                                                 | 2.115455815 | 1.126282486 | 2.001676476 |             |             |
| YKL042W | "YKL042W::SPC42::involved in SPB duplication, may facilitate attachment of the SPB to the nuclear membrane" |             |             |             |             | 1           |
|         | 1.787402693                                                                                                 | 2.142740057 | 1           | 1.654659626 | 1.620746783 | 1.83175145  |
|         | 1.802159601                                                                                                 | 1           | 1.247419532 | 1.37679785  | 1.473873382 | 1.740366832 |
|         | 0.668848009                                                                                                 | 1           | 0.953495536 |             | 0.797800825 | 1           |
|         | 0.881925557                                                                                                 | 0.887388592 | 0.923450405 | 0.700642912 | 0.846689527 | 1           |
|         | 0.924384806                                                                                                 | 1.369450769 | 0.852783027 | 1.070557349 | 1.006915442 | 1           |
|         | 1.331955425                                                                                                 | 1.341367547 | 1.233703752 | 1.390125741 | 1.498517041 | 1.988542024 |
| YDL011c | YDL011c::YDL011C::molecular_function unknown                                                                |             |             |             |             | 0.614412229 |
|         | 1.019242088                                                                                                 | 0.798356229 |             | 0.734911888 | 0.76447385  | 0.95001067  |
|         | 0.80288885                                                                                                  | 0.852381845 | 1.009062014 | 1.168566    | 1.097446719 | 1           |
|         | 0.555121654                                                                                                 | 0.811775311 | 0.927749517 | 1           | 1.960892812 | 1.80643669  |
|         | 2.215045126                                                                                                 | 0.989388783 |             | 0.897031161 | 1.1035608   | 0.864839062 |
|         | 0.664145177                                                                                                 | 0.929122727 | 1           | 0.992079634 | 1.363592125 | 1.747595289 |
|         | 1.346984627                                                                                                 | 1.426382389 | 1           | 0.989747709 | 1.072274384 | 1.13833419  |
|         | 0.65434472                                                                                                  | 1.290448253 | 0.914151482 |             |             |             |
| YDL013W | YDL013W::HEX3::Protein involved in hexose metabolism                                                        |             |             |             |             | 1           |
|         | 0.818257495                                                                                                 | 0.880448494 | 0.836075104 | 0.880295096 | 1           | 0.769612537 |
|         | 0.877075876                                                                                                 | 0.849198699 | 0.806042863 | 1           | 0.843432787 | 0.952031939 |
|         | 0.766344406                                                                                                 | 0.946315154 | 1           | 1.216826617 | 1.183202747 | 1.142500653 |
|         | 0.959320357                                                                                                 | 1.019005771 | 0.977221342 | 1.212450665 | 1           | 0.812039416 |
|         | 0.915464226                                                                                                 | 0.8479693   | 0.821037456 | 0.95573515  | 1           | 0.847369724 |
|         | 0.821935117                                                                                                 | 0.877902242 | 0.887941356 | 0.84449071  | 1           | 0.867960246 |
|         | 0.915497159                                                                                                 | 1.121936815 | 0.71575768  | 1.154080249 | 0.979823219 |             |
| YDL027c | YDL027c::YDL027C::molecular_function unknown                                                                |             |             |             |             | 1           |
|         | 1.07351397                                                                                                  | 1.219643411 | 1.343335894 | 1           | 1.189975435 | 1.201571583 |
|         | 1.40460018                                                                                                  | 1.026402885 | 1           | 1.173487015 | 1.185062178 | 1.448960556 |
|         | 1.19732304                                                                                                  | 1           | 1.344518267 | 1.274848115 | 1.863376156 | 1.465101055 |
|         | 1.749147452                                                                                                 | 2.717397121 | 3.225146    | 2.144733301 | 1           | 1.244762258 |
|         | 1.551958312                                                                                                 | 1.319209837 | 1.027413583 | 0.927909653 | 1           | 1.182909815 |
|         | 1.26037664                                                                                                  | 1.670377481 | 0.94034923  | 1.4985304   | 1           | 1.66883135  |
|         | 1.381346806                                                                                                 | 1.122381162 | 0.988349475 | 2.068151616 | 1.592760061 |             |
| YDL029W | YDL029W::ARP2::Involved in endocytosis and membrane growth and polarity                                     |             |             |             |             | 1           |
|         | 0.90797842                                                                                                  | 1.016980077 | 0.900180701 | 0.921645835 | 1           | 0.788643057 |
|         | 1.061323384                                                                                                 | 1.009696148 | 0.915815273 | 1           | 1.73699022  | 1.525450719 |
|         | 1.61166309                                                                                                  | 1.77550847  | 1           | 2.754934226 | 2.121572843 | 2.654670776 |
|         | 1.578708038                                                                                                 | 1           | 1.034362301 | 1.261870667 | 1.433963754 | 0.922230472 |

1.055440964 1 1.141938607 1.283109992 1.368589314 0.988123064  
0.958973964 1 1.471666516 1.414681661 1.174363351 1.136326056  
1.167924298 1.188221762  
YDL031w YDL031w::DBP10::Dead box protein 10 1 0.738550767 0.663966529  
0.978724413 0.825524052 1 0.693881042 0.683977891 0.892829519  
1.010779984 1 0.598955113 0.468161797 0.486013427 1.022774174 1  
0.662268074 0.391531361 0.50477848 0.574266659 1 0.93323404  
1.303584276 0.688412709 0.707625887 1 0.812131938 0.776706815  
0.647685281 0.750645811 0.78470223 1 0.801994734 0.899236074  
0.542823775 1.070909342 1.172243737 1 0.834165809 0.968915254  
1.048727516 1.115658899 0.823388492 1.113793689  
YDL033c YDL033c::YDL033C::not yet annotated 1 0.87879156 0.977484983  
1.107174658 0.646242183 1 0.921794773 0.967071026 1.110222919  
1.050848716 1 0.850225104 0.944764123 1.056698583 1.003528021 1  
0.660234019 0.842317501 1 1.722988112 0.928648085  
0.825609192 1 0.977918694 0.91464451 1.077215896 1.09842443  
1.143486139 1 0.766481109 1.116173811 0.976701339 0.720221015  
0.890180321 1 0.876244468 1.088101486 0.87352776 0.717285423  
0.730622993  
YDL035c YDL035c::GPR1::G-protein-coupled receptor at plasma membrane;  
interactions in two-hybrid system with Gpa2p 0.998573744 1.026075044  
1.017148825 0.935435841 1.040781808  
0.841942736 1.06514009 1 1.146579338  
0.649605219 1 0.985526318 1.123136812 0.952671888  
1.021783653 1.043800546 1 1.160768001 0.97528016 0.91132333  
1.053130014 1 1.271823902 1.586464786 1.230568732 0.804579698  
1.246834878 0.95530575  
YDL037c YDL037c::YDL037C::not yet annotated 1 0.929966698 0.987627809  
1.04719678 1.123011877 1 0.856345107 0.95451206 0.935977966  
1.043705394 1 1.890813251 0.787594487 0.931397056 1.010818269 1  
0.451937862 0.944144995 0.754398153 0.614774169 1 1.34112497  
2.900795717 2.078195655 1.322721544 0.870699328 1.102265626  
1.305020987 0.872667264 1 0.852825315 1.20039937 1  
0.658625068 0.682572893 0.742594008 0.299848828 0.958718824 0.984201335  
YDL051W YDL051W::LHP1::Protein homologous to human La (SS-B) autoantigen 1  
0.854909861 0.783011128 0.733852435 1.027021962 1 0.67803062  
0.573364847 1.110222919 1.158556555 1 0.699617541 0.476196159  
0.436279411 1.079966261 1 0.693625245 0.28609743 0.289604293  
0.798306555 1 1.252733609 0.595954449 0.550406683 0.809734601 1  
0.946600868 0.820217664 0.653973749 0.842858657 0.807346203 1  
0.894827396 0.929229456 0.625062607 1.028801926 1.416088325 1  
1.078706009 0.936352463 0.996897065 1.417333695 0.658756418 0.929037055  
YDL053c YDL053c::YDL053C::molecular\_function unknown 1 1.099482889  
1.360999602 1.01478008 1.461355783 1 1.060726005 1.091839285  
1.285834635 1.336022235 1 1.052198877 1.081117587 1.430677676  
1.050130371 1 0.941183941 0.89673152 0.992249153 1.521613416 1  
1.478597339 2.055609378 2.076436667 1.620978049 1 0.947526003  
0.696710472 0.660486572 0.87955634 1 0.91239365 1.241040315  
1.071244885 0.92000692 1.666063875 1 1.094285892 1.393736577  
1.059506598 1.609210017 1.491278117 1.253017939  
YDL055C YDL055C::PSA1::synthesizes GDP-mannose from GTP and mannose-1-  
phosphate. 1 1.076987574 0.805479847 1.108933096 0.912175077 1  
1.013317806 1.087206442 0.93458716 1.154488689 1 0.841071692  
0.654986614 0.555159417 1.167948997 1 0.795659693 0.522602157  
0.443915541 0.600711855 1 0.751849064 0.182009731 0.205906592  
0.83048302 1 1.086081093 0.974965592 1.540731552 1.334937083  
1.176753467 1 1.088479335 0.892287422 1.116914263 0.558367849

|         |                                                                                                                                   |             |             |             |             |             |             |
|---------|-----------------------------------------------------------------------------------------------------------------------------------|-------------|-------------|-------------|-------------|-------------|-------------|
|         | 0.298159143                                                                                                                       | 1           | 1.360821299 | 0.761818876 | 1.419566134 | 0.73844472  |             |
|         | 1.37963319                                                                                                                        |             | 0.899265805 |             |             |             |             |
| YDL057w | YDL057w::YDL057W::molecular_function unknown                                                                                      |             |             |             |             | 1           |             |
|         | 1                                                                                                                                 |             |             | 1           | 1.133249952 | 1.405573398 |             |
|         | 1.570102445                                                                                                                       | 1           | 0.992587595 |             | 1.6239367   | 1.598292097 | 1           |
|         | 1.483232869                                                                                                                       | 2.595797906 | 1.918250412 | 1.931950259 | 1           | 0.98428342  |             |
|         | 0.922259752                                                                                                                       | 0.865332215 | 1.053629048 | 1.151706692 | 1           | 0.866721925 |             |
|         | 0.960661337                                                                                                                       | 1.327999278 | 1.089395067 | 0.915110471 | 1           | 0.896401048 |             |
|         | 0.920154645                                                                                                                       | 1.231699651 | 0.54579602  | 0.878141562 | 2.787111269 |             |             |
| YDL059C | YDL059C::RAD59::Involved in mitotic recombination                                                                                 |             |             |             |             | 1           |             |
|         | 0.973164619                                                                                                                       | 1.717995978 | 1.08909291  | 1.383745382 | 1           | 0.923165418 |             |
|         | 1.006804648                                                                                                                       | 1.65555759  | 1.353114784 | 1           | 1.862282838 | 5.444284056 |             |
|         | 4.556643848                                                                                                                       | 1.924761753 | 1           | 1.097464838 | 0.663979975 | 0.933294541 |             |
|         | 1.168506008                                                                                                                       | 1           | 2.381286003 | 2.230236471 | 2.637908022 | 1.692058417 | 1           |
|         |                                                                                                                                   | 1.017852072 | 0.82746108  | 1.084755683 | 1           | 1.707005253 |             |
|         | 1.793262926                                                                                                                       | 3.256844145 | 1           | 1.192514119 | 1.252859854 | 1.188932061 |             |
|         | 0.468979898                                                                                                                       |             | 2.182055098 |             |             |             |             |
| YDL061C | YDL061C::RPS29B::Homology to rat S29                                                                                              |             |             |             |             | 1           | 1.516838478 |
|         | 1.866980939                                                                                                                       | 0.764919566 | 1.961573875 | 1           | 1.055330268 | 1.035952529 |             |
|         | 1.668016149                                                                                                                       | 1.312379272 | 1           | 1.122465825 | 1.040414192 | 1.16206387  |             |
|         | 1.017133124                                                                                                                       | 1           | 0.731438001 | 0.286801388 | 0.249525106 | 0.558594209 | 1           |
|         | 1.764506631                                                                                                                       | 1.385263695 | 0.823545098 | 0.723543256 | 1           | 0.942744509 |             |
|         | 0.862650283                                                                                                                       | 0.548747259 | 0.736363977 | 0.973559578 | 1           | 1.149984028 |             |
|         | 2.059154507                                                                                                                       | 0.904131945 | 0.899418336 | 2.210768374 | 1           | 1.041731478 |             |
|         | 1.52831972                                                                                                                        | 1.034712488 | 2.152002465 | 1.159467438 | 1.354590372 |             |             |
| YDL075W | YDL075W::RPL31A::Homology to rat L31                                                                                              |             |             |             |             | 1           | 1.004732708 |
|         | 1.591369854                                                                                                                       | 0.90376093  | 2.174411592 | 1           | 0.96454516  | 1.001060572 |             |
|         | 1.503071076                                                                                                                       | 1.36084148  | 1           | 0.952714443 | 0.973543168 | 0.998744249 |             |
|         | 1.104265211                                                                                                                       | 1           | 0.809413932 | 0.321895012 | 0.235931021 | 0.479792215 | 1           |
|         | 2.00159327                                                                                                                        | 1.336454263 | 0.763003617 | 1.064084054 | 1           | 0.890185628 |             |
|         | 0.98097283                                                                                                                        | 0.622456137 | 0.662820825 | 1.066343849 | 1           | 1.366015635 |             |
|         | 1.7928119                                                                                                                         | 1.151383116 | 0.933465935 | 2.763405166 | 1           | 0.819760879 |             |
|         | 1.422437026                                                                                                                       | 1.104894747 | 1.975375079 | 1.311202414 | 0.896639019 |             |             |
| YDL077c | YDL077c::VAM6::Required for the vacuolar morphogenesis in yeast                                                                   |             |             |             |             | 1           |             |
|         | 0.751369521                                                                                                                       | 0.824588366 | 0.918193666 | 0.83340604  | 1           | 0.888818192 |             |
|         | 0.903802804                                                                                                                       | 0.863999597 | 0.667933231 | 1           | 0.935537633 | 0.932319167 |             |
|         | 0.588866033                                                                                                                       | 0.962902755 | 1           | 1.075478055 |             | 0.584224188 | 1           |
|         | 1.224743675                                                                                                                       | 2.011522868 |             | 1.236706675 | 1           | 1.024250143 |             |
|         | 0.680054676                                                                                                                       | 0.778954119 | 1.003143872 | 1           | 0.864932591 | 1.134773211 |             |
|         |                                                                                                                                   | 1           | 0.868371664 | 1.197341709 | 1.228885039 | 1.051576368 |             |
|         | 1.061256299                                                                                                                       |             |             |             |             |             |             |
| YDL079C | YDL079C::MRK1::putative protein kinase with similarity to mammalian glycogen synthase kinase-3 and Drosophila Zeste-White3/Shaggy |             |             |             |             | 1           |             |
|         | 0.763547858                                                                                                                       | 0.837886624 | 0.699585547 | 0.75981915  | 1           | 0.821755493 |             |
|         | 0.744633184                                                                                                                       | 0.913992611 | 0.792879167 | 1           | 0.867948288 | 1.001372648 |             |
|         | 0.752856597                                                                                                                       | 1           | 1.082821645 | 0.932495627 | 1.338987656 | 1.445290886 | 1           |
|         | 1.745680138                                                                                                                       | 1.489022873 | 1.491800689 | 1.102835523 | 1           | 0.865839524 |             |
|         | 0.971685479                                                                                                                       | 0.857479695 | 0.969388923 | 1.100313267 | 1           | 0.850350812 |             |
|         | 0.844675982                                                                                                                       | 0.71757315  | 1.080869687 | 0.904834122 | 1           | 0.805270636 |             |
|         | 0.694263382                                                                                                                       | 1.037034927 | 0.979775801 | 1.035083778 | 0.795942198 |             |             |
| YDL081C | "YDL081C::RPP1A::Homology to rat P1, human P1, and E.coli L12eIIA"                                                                |             |             |             |             |             |             |
|         | 1                                                                                                                                 | 1.483008524 | 1.466443232 | 0.689084596 | 1.214035866 | 1           | 0.955583483 |
|         | 0.875225706                                                                                                                       | 1.226259168 | 1.110539793 | 1           | 1.110589433 | 1.009786064 |             |
|         | 1.233111209                                                                                                                       | 0.817135912 | 1           | 0.867626946 | 0.346190235 | 0.279466764 |             |
|         | 0.652944601                                                                                                                       | 1           | 1.69996277  | 1.760104093 | 0.770735814 | 0.753442053 | 1           |
|         | 1.01200485                                                                                                                        | 1.002336536 | 0.858947194 | 1.065274303 | 1.046339621 | 1           |             |

|         |                                                                                                                                                                        |             |             |             |             |               |                         |
|---------|------------------------------------------------------------------------------------------------------------------------------------------------------------------------|-------------|-------------|-------------|-------------|---------------|-------------------------|
|         | 0.965282042                                                                                                                                                            | 1.096699026 | 0.687700928 | 0.580276874 | 1.10856556  | 1             |                         |
|         | 0.954046901                                                                                                                                                            | 1.052315632 | 0.813863299 | 1.245380285 | 0.791671671 | 1.315187225   |                         |
| YDL083C | YDL083C::RPS16B::Homology to rat S16                                                                                                                                   |             |             |             |             | 1             | 1.185548025             |
|         | 1.08581631                                                                                                                                                             | 0.643865231 | 1.306769594 | 1           | 0.847303233 | 0.771775561   |                         |
|         | 1.046746051                                                                                                                                                            | 1.039364511 | 1           | 0.859592359 | 0.750157465 | 0.630087902   |                         |
|         | 0.729267722                                                                                                                                                            | 1           | 0.801844433 | 0.358184947 | 0.217695738 | 0.6119511 1   |                         |
|         | 1.292315091                                                                                                                                                            | 0.669457289 | 0.467793037 | 0.804907181 | 1           | 1.044416346   |                         |
|         | 1.001358584                                                                                                                                                            | 0.685706168 | 1.000761506 | 0.816293674 | 1           | 1.097496018   |                         |
|         | 1.557674602                                                                                                                                                            | 0.714597294 | 0.583830852 | 1.415955822 | 1           | 1.099391841   |                         |
|         | 1.195485672                                                                                                                                                            | 0.929325144 | 1.478704989 | 1.010689257 | 1.065634415 |               |                         |
| YDL085w | YDL085w::NDE2::Hypothetical ORF                                                                                                                                        |             |             |             |             | 1             | 1.038329531             |
|         | 1.897849963                                                                                                                                                            | 1           | 1.315801236 | 1.81317341  | 2.39124943  | 2.225032606 1 |                         |
|         | 1.232553778                                                                                                                                                            | 2.236528299 | 4.686582688 | 2.508259476 | 1           | 0.778283668   |                         |
|         | 1.015020969                                                                                                                                                            | 2.184113665 | 1.933830794 | 1           | 1.451295217 | 2.683000783   |                         |
|         | 4.14313061                                                                                                                                                             | 2.631623467 | 1           | 0.933381073 | 0.876644713 | 1.076657214   |                         |
|         | 0.960044447                                                                                                                                                            | 1.007984416 | 1           | 0.881942701 | 0.834233091 | 1.028513198   |                         |
|         | 1.071288733                                                                                                                                                            | 0.833749133 | 1           | 0.857649394 | 0.915202528 | 1.09136929    |                         |
|         | 0.925092191                                                                                                                                                            | 1.174972657 | 1.078768762 |             |             |               |                         |
| YNL163C | YNL163C::RIA1::Ribosome Assembly; Elongation Factor Like                                                                                                               |             |             |             |             | 1             |                         |
|         | 1.330669939                                                                                                                                                            | 1.047404088 | 1.60381847  | 1.060569744 | 1           | 1.535313725   |                         |
|         | 1.288493745                                                                                                                                                            | 1.106726199 | 0.987516784 | 1           | 1.080218724 | 1.179378904   |                         |
|         | 0.846550279                                                                                                                                                            | 1.399050508 | 1           | 0.797093395 | 0.562218875 | 0.551754068   |                         |
|         | 0.549347263                                                                                                                                                            | 1           | 0.847899405 | 0.710101315 | 0.516754325 | 1             |                         |
|         | 0.710772999                                                                                                                                                            | 0.779339699 | 0.779324855 | 0.871339119 | 0.800417285 |               |                         |
|         | 1.141136798                                                                                                                                                            | 0.777679612 | 0.740718211 | 1.13708573  | 0.515505634 | 1             |                         |
|         | 0.916645909                                                                                                                                                            | 0.814031334 | 1.043632368 | 0.63429584  | 0.630008074 | 0.80732532    |                         |
| YNL165W | YNL165W::YNL165W::molecular_function unknown                                                                                                                           |             |             |             |             | 1             | 1.194447253             |
|         | 1.053571372                                                                                                                                                            | 1.284191838 | 1.226560258 | 1           | 1.056092953 | 0.955192495   |                         |
|         | 1.350129175                                                                                                                                                            | 1.37389638  | 1           | 0.885933572 | 0.935205877 | 1.025493506   |                         |
|         | 1.40513881                                                                                                                                                             | 1           | 0.676250344 | 0.673917386 | 0.74554476  | 1             |                         |
|         | 0.671187819                                                                                                                                                            | 1.100092376 | 0.63464945  | 1           | 0.960171163 | 0.92500916    |                         |
|         | 0.866549492                                                                                                                                                            | 0.805395234 | 0.859858077 | 1           | 1.087439795 | 1.513383584   |                         |
|         | 1.01653273                                                                                                                                                             | 1.063160754 | 1.6501922   | 1           | 0.867196479 | 1.285234765   |                         |
|         | 1.166890657                                                                                                                                                            | 1.072118814 | 1.015905663 | 0.940420177 |             |               |                         |
| YNL167C | "YNL167C::SKO1::Suppressor of PKA overexpression; bZIP protein that binds to CRE motifs, interacts with Mig1p"                                                         |             |             |             |             | 1             | 1.244128084 1.311293115 |
|         | 1.642659954                                                                                                                                                            | 1.167445304 | 1           | 1.438850754 | 1.457225049 | 1.31884326    |                         |
|         | 1.143377875                                                                                                                                                            | 1           | 1.49717135  | 1.561124994 | 1.26714956  | 1.227786183 1 |                         |
|         | 1.036713619                                                                                                                                                            | 1.947765678 | 1.318119036 | 0.649655422 | 1           | 0.639701731   |                         |
|         | 0.799819481                                                                                                                                                            | 0.48442375  | 0.201070946 | 1           | 1.197382574 | 1.118699924   |                         |
|         | 1.146460035                                                                                                                                                            | 1.144504873 | 0.990900372 | 1           | 0.83655201  | 0.772303857   |                         |
|         | 0.69623901                                                                                                                                                             | 0.712539019 | 0.674074161 | 1           | 1.04000016  | 1.044597068   |                         |
|         | 1.062041546                                                                                                                                                            | 1.019932777 | 0.966068227 | 0.867743381 |             |               |                         |
| YNL169C | YNL169C::PSD1::Converts phosphatidylserine to phosphatidylethanolamine. Mitochondrial Psd1p provides ~90% of total cellular phosphatidylserine decarboxylase activity. |             |             |             |             | 1             | 1.523991984 1.337291753 |
|         | 1.227356371                                                                                                                                                            | 1.03474297  | 1           | 1.486951454 | 1.460731103 | 1.024577213   |                         |
|         | 1.078245521                                                                                                                                                            | 1           | 1.027537312 | 1.153428561 | 0.759549173 | 0.821483127 1 |                         |
|         | 1.187537633                                                                                                                                                            | 0.747913175 | 0.772579823 | 0.916744626 | 1           | 1.182527566   |                         |
|         | 0.613975595                                                                                                                                                            | 0.574936751 | 0.649492635 | 1           | 1.02443762  | 1.197969166   |                         |
|         | 1.052917384                                                                                                                                                            | 1.213209445 | 0.937085296 | 1           | 0.843658881 | 0.818049059   |                         |
|         | 0.829927243                                                                                                                                                            | 0.698339903 | 0.856800774 | 1           | 0.828795435 | 0.977825325   |                         |
|         | 0.989841898                                                                                                                                                            | 1.152607149 | 1.189026951 | 0.900141469 |             |               |                         |
| YNL171C | YNL171C::YNL171C::molecular_function unknown                                                                                                                           |             |             |             |             | 1             | 2.069853487             |
|         | 1.975780564                                                                                                                                                            | 1.448133578 | 2.294101778 | 1           | 1.658542598 | 1.451178474   |                         |
|         | 2.008536049                                                                                                                                                            | 1.882546414 | 1           | 1.538383723 | 1.498583428 | 2.090366674   |                         |
|         | 1.320667163                                                                                                                                                            | 1           | 0.944489224 | 0.980390528 | 0.897576282 | 1.247238607 1 |                         |

|             |                                                                       |             |             |             |             |
|-------------|-----------------------------------------------------------------------|-------------|-------------|-------------|-------------|
| 1.062512822 | 1.44729906                                                            | 0.932375463 | 0.843548209 | 1           | 0.937996272 |
| 1.111515263 | 0.858778966                                                           | 0.735791043 | 0.969148678 |             | 0.875958376 |
| 1.332643505 | 0.953291195                                                           | 0.715874453 | 1.365324347 | 1           | 1.062175862 |
| 1.633032247 | 1.020139668                                                           | 1.550583931 | 1.155033223 | 1.571745042 |             |
| YNL185C     | YNL185C::MRPL19::mitochondrial ribosomal protein of the large subunit |             |             |             |             |
| 1           | 1.350083748                                                           | 1.708489498 | 1.323428612 | 1.445667484 | 1           |
| 1.207007858 | 1.629601245                                                           | 1.716631747 | 1.598417824 | 1           | 1.431977458 |
| 1.229967761 | 2.192609689                                                           | 1.017943972 | 1           | 1.253025069 | 0.956974386 |
| 0.968882031 | 1.625265484                                                           | 1           | 1.650034697 | 1.705546337 | 1.568449386 |
| 1.52063055  | 1                                                                     | 1.043001659 | 1.406709769 | 1.149394944 | 1.207700919 |
| 1.078996841 | 1                                                                     | 0.863000461 | 1.22222732  | 0.85303875  | 0.76873263  |
| 1.064901074 | 1                                                                     | 0.951951517 | 1.129727729 | 0.944816147 | 1.228215519 |
| 1.291147127 | 1.236381036                                                           |             |             |             |             |
| YNL187W     | YNL187W::YNL187W::molecular_function unknown 1 1.282502426            |             |             |             |             |
| 1.218484283 | 1.408252732                                                           | 1.014641273 | 1           | 1.251723691 | 1.250263763 |
| 1.06410605  | 1.346466389                                                           | 1           |             | 1.272151008 | 0.973135482 |
| 1.186662878 |                                                                       | 0.957208076 |             |             | 1           |
| 0.75483493  | 1.018186772                                                           | 0.906748196 | 0.918393968 | 1.128541359 |             |
| 0.794717975 | 1.131543547                                                           |             |             | 0.946517913 | 0.796055674 |
| 1.12193549  | 0.648967296                                                           | 1.137606852 | 0.840599021 |             |             |
| YNL189W     | YNL189W::SRP1::karyopherin alpha homolog of 60 kDa 1                  |             |             |             |             |
| 1.179302898 | 1.070133577                                                           | 1.293471336 | 0.921032457 | 1           | 1.380033996 |
| 1.217200581 | 0.93342633                                                            | 0.886883961 | 1           | 1.082475174 | 1.109941547 |
| 0.603882013 | 1.204451705                                                           | 1           | 1.468231414 | 1.267129634 | 1.077433562 |
| 0.994681692 | 1                                                                     | 0.795544657 | 0.521035247 | 0.340757326 | 1.032607076 |
| 1.103957174 | 1.134155393                                                           | 1.329740314 | 1.09691656  | 0.922888768 | 1           |
| 0.942784612 | 0.885769846                                                           | 0.7735029   | 0.788056987 | 0.715788703 | 1           |
| 0.912082848 | 1.080646293                                                           | 0.978380438 | 1.002676921 | 0.915007163 | 0.899265805 |
| YNL191W     | YNL191W::YNL191W::molecular_function unknown 1 1.272191089            |             |             |             |             |
| 1.170910445 | 1.246869458                                                           | 0.976952223 | 1           | 1.131956372 | 1.300949583 |
| 1.183392578 | 1                                                                     | 1.098328528 | 1.331417267 | 0.778911493 | 1.142267985 |
| 1.100569296 | 1.006563839                                                           | 1.227458262 | 1.254073798 | 1           | 0.49143471  |
| 0.428226547 | 0.336872252                                                           | 0.810660772 | 1           | 0.92214581  | 0.740657211 |
| 0.733965658 | 1.009404311                                                           | 0.848030981 | 1           | 1.392357714 | 0.799927799 |
| 0.369254024 | 0.913880538                                                           | 0.878809686 | 1           | 1.195579643 | 0.676771981 |
| 0.94575065  | 0.688850139                                                           | 0.722159547 | 0.610309951 |             |             |
| YNL193W     | YNL193W::YNL193W::molecular_function unknown 1 1.114121438            |             |             |             |             |
| 1.187458152 | 1.436799868                                                           | 1.0745072   | 1           | 1.354813197 | 1.28202479  |
| 1.205992985 | 1.142684114                                                           | 1           | 1.182892481 | 1.455422684 | 1.135576548 |
| 1.095495617 | 1                                                                     | 1.43059338  |             | 0.931429983 | 0.801845815 |
| 1.061086212 | 1.242246336                                                           | 0.896260582 |             | 1           | 1.092387072 |
| 1.095605068 | 0.844530186                                                           | 0.894354996 | 1           | 0.912589968 | 1.193795655 |
| 0.897403951 | 0.821730441                                                           | 0.706304148 | 1           | 1.24621025  | 1.545776392 |
| 1.147332712 | 0.975077469                                                           | 1.274685867 | 1.157574951 |             |             |
| YDL099w     | YDL099w::YDL099W::molecular_function unknown 1 0.535447544            |             |             |             |             |
| 1.004563507 | 0.876626648                                                           | 1.081611945 | 1           | 0.709500374 | 1.181661231 |
| 1.096243521 | 1                                                                     | 0.745942448 | 1.059234025 | 1.3561586   | 0.991642114 |
| 0.943183222 |                                                                       | 1           | 1.636633108 |             | 1.752448876 |
| 0.959910096 |                                                                       | 0.722936556 | 1.073771583 | 1           | 2.025283849 |
|             |                                                                       | 0.906748223 | 0.854547144 |             | 0.722958828 |
| 0.997335787 |                                                                       |             |             |             |             |
| YDL101C     | YDL101C::DUN1::DNA damage response 1 0.882175118 1.047513797          |             |             |             |             |
| 1.092714558 | 1                                                                     | 0.972313859 | 0.951375818 | 1.002942993 | 0.967043064 |
| 0.752556572 | 0.819558942                                                           | 0.808632998 | 1.318949933 | 1           | 0.595201306 |
| 0.534404629 | 0.694924507                                                           | 0.940037779 | 1           | 1.33380213  |             |
| 1.291367098 | 1                                                                     | 0.883226816 | 1.000639072 | 1.107225961 | 0.97470484  |
| 1.218893506 | 1                                                                     | 1.289535044 | 0.93228117  | 1.480636584 | 1.509197312 |



|         |                                                                                                                                                 |             |             |             |             |             |             |             |
|---------|-------------------------------------------------------------------------------------------------------------------------------------------------|-------------|-------------|-------------|-------------|-------------|-------------|-------------|
|         | 0.786069385                                                                                                                                     | 1           | 0.814277473 | 0.637774273 | 0.831612851 | 0.635323596 |             |             |
|         | 0.97060169                                                                                                                                      |             | 0.633076143 |             |             |             |             |             |
| YDL103C | YDL103C::QRI1::UDP-N-acetylglucosamine pyrophosphorylase                                                                                        |             |             |             |             |             | 1           |             |
|         | 0.76491259                                                                                                                                      |             | 0.856798932 | 0.980587335 | 0.823025756 | 1           | 0.881626037 |             |
|         | 0.995942114                                                                                                                                     | 1.06463108  | 0.888404761 | 1           | 0.785975182 | 0.950216755 |             |             |
|         | 0.892221032                                                                                                                                     | 1.237295183 | 1           | 0.821801011 | 0.89792291  | 0.957682368 |             |             |
|         | 1.225268325                                                                                                                                     | 1           | 1.845885866 | 1.473869795 | 1.60335677  | 2.384931976 | 1           |             |
|         | 1.039975189                                                                                                                                     | 1.126991008 | 1.120077277 | 0.859443482 | 1.044983511 | 1           |             |             |
|         | 1.160200029                                                                                                                                     | 1.162717798 | 1.26661999  | 0.882489687 | 1           | 1.216472781 |             |             |
|         | 1.195018474                                                                                                                                     | 1.267131637 | 1.1351293   |             |             |             |             |             |
| YDL105W | YDL105W::QRI2::Product of gene unknown                                                                                                          |             |             |             |             |             | 1           | 0.724228581 |
|         | 1.302083193                                                                                                                                     | 1           | 0.857221251 | 1.143407566 | 1.125472904 | 1           |             |             |
|         | 0.760972993                                                                                                                                     | 0.773075065 | 0.740784489 | 1.253750815 |             | 0.473650088 |             |             |
|         | 0.58421694                                                                                                                                      |             | 0.154834213 | 0.374603374 | 0.364674141 | 1           |             |             |
|         | 1.05820728                                                                                                                                      | 1.040141054 | 1.025115212 | 1.325536311 | 1           |             |             |             |
|         | 0.802223693                                                                                                                                     | 1.187872011 | 1           | 0.795899645 | 0.824592052 |             |             |             |
|         | 0.882426129                                                                                                                                     | 0.646727758 | 0.890751597 |             |             |             |             |             |
| YDL107W | YDL107W::MSS2::cox1 pre-mRNA splicing factor                                                                                                    |             |             |             |             |             | 1           | 0.938268022 |
|         | 1.352513796                                                                                                                                     | 0.979343839 | 1.551230144 | 1           | 0.838164362 | 0.891063634 |             |             |
|         | 1.341236287                                                                                                                                     | 1.16146313  | 1           | 0.911299374 | 1.012115243 | 1.182903231 |             |             |
|         | 1.192814923                                                                                                                                     | 1           | 0.546631821 | 0.683503806 | 0.60240613  | 1.454736732 | 1           |             |
|         | 1.607586411                                                                                                                                     |             | 2.957284279 |             | 1.020287327 | 1.081471131 |             |             |
|         | 0.854735812                                                                                                                                     | 0.758192015 | 1.054472942 | 1           | 0.915443588 | 1.150094417 |             |             |
|         | 0.897718509                                                                                                                                     | 0.843876215 | 1.364912736 | 1           | 1.319692126 | 1.442343143 |             |             |
|         | 1.947916452                                                                                                                                     |             |             |             |             |             |             |             |
| YDL109c | YDL109c::YDL109C::molecular_function unknown                                                                                                    |             |             |             |             |             | 1           | 0.880636177 |
|         | 0.856788728                                                                                                                                     | 0.931497527 | 0.550814357 | 1           | 0.945097428 | 1.048918289 |             |             |
|         | 0.812879979                                                                                                                                     | 0.740143045 | 1           | 1.260340923 | 1.159505425 | 0.60843819  |             |             |
|         | 0.950707541                                                                                                                                     | 1           | 1.382042366 | 1.60671996  | 2.158479278 | 1.218740759 | 1           |             |
|         | 1.416066712                                                                                                                                     | 1.660660106 | 1.787695061 | 1.044063707 | 1           | 1.246549313 |             |             |
|         | 1.118669006                                                                                                                                     | 1.238020189 | 1.253193037 | 1.03919743  | 1           | 0.976721893 |             |             |
|         | 1.154023028                                                                                                                                     | 0.794858506 | 0.926202736 | 0.79136277  | 1           | 1.056400427 |             |             |
|         | 1.096225704                                                                                                                                     | 1.317441632 | 0.975564096 | 0.759022827 | 0.880877781 |             |             |             |
| YDL123w | YDL123w::SNA4::Homology to PMP3/SNA1 (Sensitivity to Na+)                                                                                       |             |             |             |             |             | 1           |             |
|         | 1.087684175                                                                                                                                     | 0.960094839 | 0.667442788 | 0.517196947 | 1           | 0.899229984 |             |             |
|         | 0.914700564                                                                                                                                     | 0.798860516 | 0.637584852 | 1           | 1.373153626 | 1.292678832 |             |             |
|         | 1.28784224                                                                                                                                      | 0.669179197 | 1           | 1.084065989 | 0.96460706  | 1.316192865 |             |             |
|         | 1.103012043                                                                                                                                     | 1           | 0.839469601 | 0.744406288 | 0.762246624 | 0.658686986 | 1           |             |
|         | 1.048037074                                                                                                                                     | 1.107747808 | 1.165771519 | 1.080184074 | 1.061298987 | 1           |             |             |
|         | 0.760810049                                                                                                                                     | 0.770267645 | 0.655479857 | 0.887737294 | 0.919253401 | 1           |             |             |
|         | 0.787531529                                                                                                                                     | 0.722228761 | 1.018919127 |             | 0.973368646 | 1.062131964 |             |             |
| YDL125c | "YDL125c::HNT1::Hint homolog, member of the histidine triad superfamily of nucleotide-binding proteins"                                         |             |             |             |             |             | 1           | 1.055543123 |
|         | 0.853608005                                                                                                                                     | 1.00973896  | 1           | 0.880942145 | 0.825766779 | 1.176887558 |             |             |
|         | 1.05977986                                                                                                                                      | 1           | 1.035883018 | 1.079704467 | 1.217732603 | 0.870515108 | 1           |             |
|         | 0.614263431                                                                                                                                     | 2.657041115 | 2.200594754 | 0.845442698 | 1           | 0.689844186 |             |             |
|         | 0.40505069                                                                                                                                      | 0.328335324 | 0.341312912 | 1           | 1.307924864 | 1.250994296 |             |             |
|         | 1.039088233                                                                                                                                     | 1.2501526   | 0.933809389 | 1           | 1.1032186   | 1.196058809 |             |             |
|         | 0.698316526                                                                                                                                     | 0.709624725 | 1.289245989 | 1           | 1.041113957 | 0.954364187 |             |             |
|         | 0.687574451                                                                                                                                     | 1.131518351 | 0.876817922 | 0.645334878 |             |             |             |             |
| YDL127w | YDL127w::PCL2::Interacts with cyclin-dependent kinase PHO85 to form kinase complex with G1-periodic activity involved in cell cycle progression |             |             |             |             |             | 1           |             |
|         | 0.808728778                                                                                                                                     | 0.93252507  | 0.995046383 | 0.956020564 | 1           | 0.802569039 |             |             |
|         | 0.960326554                                                                                                                                     | 1.135481369 | 1.215349602 | 1           | 0.644576262 | 0.720387928 |             |             |
|         | 0.917393885                                                                                                                                     | 1.222407981 | 1           | 0.504952638 | 0.682103705 | 0.840911766 | 1           |             |
|         | 1.097164719                                                                                                                                     | 1.869611542 | 1.347243982 | 1           | 0.871219618 | 0.87914305  |             |             |
|         | 0.986036841                                                                                                                                     | 0.90868929  | 0.984493866 | 1           | 0.944689549 | 0.994461969 |             |             |

|         |                                              |             |             |             |             |             |             |
|---------|----------------------------------------------|-------------|-------------|-------------|-------------|-------------|-------------|
|         | 0.896373487                                  | 1.00322847  | 1.498667106 | 1           | 1.039784598 | 1.069049888 |             |
|         | 0.862673806                                  | 1.040940153 | 1.102410567 |             |             |             |             |
| YDL129w | YDL129w::YDL129W::molecular_function unknown |             |             |             |             | 1           | 1.16008623  |
|         | 1.030089732                                  | 0.990882921 | 0.934644374 | 1           | 0.989945198 | 0.979730313 |             |
|         | 1.061618704                                  | 1.180534606 | 1           | 0.875212975 | 0.765793901 | 0.773853071 |             |
|         | 0.956399774                                  | 1           | 0.619089374 | 0.752825573 | 0.814671915 | 1           |             |
|         | 1.314847225                                  | 2.593037738 | 1.895693148 | 1.64800291  | 1           | 0.826458179 |             |
|         | 0.916759642                                  | 0.896626089 | 1.093376515 | 0.942451045 | 1           | 0.781913914 |             |
|         | 0.630761106                                  | 0.683112198 | 1.120375323 | 0.779648968 | 1           | 0.701657365 |             |
|         | 0.487662419                                  | 0.821756924 | 0.759165994 |             |             |             |             |
| YNL195C | YNL195C::YNL195C::molecular_function unknown |             |             |             |             | 1           | 1.520856333 |
|         | 2.265832286                                  | 2.038066389 | 1.960863551 | 1           | 1.713718971 | 2.511719555 |             |
|         | 2.468145227                                  | 2.341121783 | 1           | 2.064711173 | 5.035193633 | 15.04241035 |             |
|         | 2.77794675                                   | 1           | 0.957054642 | 2.914451036 | 1.430381581 |             |             |
|         | 0.424920966                                  | 0.555754853 | 1.115830187 | 1           | 1.237378846 | 1.346755292 |             |
|         | 1.998420623                                  | 1.864758043 | 1.625655521 | 1           | 0.903951178 | 1.046358151 |             |
|         | 1.442112046                                  | 2.557747663 | 1           | 0.681546045 | 0.714529671 | 1.482578376 |             |
|         | 0.051627197                                  |             |             |             |             |             |             |
| YNL209W | YNL209W::SSB2::stress-seventy subfamily B    |             |             |             |             | 1           | 1.608634729 |
|         | 0.772475702                                  | 1.334623401 | 0.860472215 | 1           | 1.759828234 | 1.187067102 |             |
|         | 0.676707311                                  | 0.8234979   | 1           | 1.105056146 | 0.868191474 | 0.347702076 |             |
|         | 0.784597032                                  | 1           | 1.250434262 | 0.84482096  | 0.659450637 | 0.473494004 |             |
|         | 0.492204028                                  | 0.110552678 | 0.081306976 | 0.391125598 | 1           | 1.158252695 |             |
|         | 0.577405853                                  | 1.310056818 | 1.657988402 | 1.002793724 | 1           | 0.88797395  |             |
|         | 0.840971803                                  | 0.623397468 | 0.592658632 | 0.605688494 | 1           | 1.048435797 |             |
|         | 0.763094151                                  | 0.669276806 | 0.89574589  | 0.61711022  | 0.95530575  |             |             |
| YNL211C | YNL211C::YNL211C::molecular_function unknown |             |             |             |             | 1           | 1.304000134 |
|         | 1.536711914                                  | 1.227911512 | 1.964583316 | 1           | 1.178410387 | 1.067410889 |             |
|         | 1.650385311                                  | 1.498587703 | 1           | 1.164382026 | 1.285661224 | 1.773740463 |             |
|         | 1.132530309                                  | 1           | 0.984077862 | 0.955356402 | 1.239078619 | 1.230899321 |             |
|         | 0.890371014                                  | 1.244642113 |             | 0.960845795 | 1           | 0.763065648 |             |
|         | 0.464334284                                  | 0.669384839 | 0.981821484 | 1           | 1.442207437 | 1.721134318 |             |
|         | 1.601165195                                  | 1           | 1.181491256 | 1.311337029 | 1.763920326 |             |             |
|         | 2.653553118                                  | 1.709218067 |             |             |             |             |             |
| YNL213C | YNL213C::YNL213C::molecular_function unknown |             |             |             |             | 1           | 1.108397527 |
|         | 1.542571922                                  | 1.123662801 | 1.956513152 | 1           | 0.999066272 | 1.077372304 |             |
|         | 1.640954463                                  | 1.601143826 | 1           | 1.034109549 | 1.226118776 | 1.622562407 |             |
|         | 1.265108394                                  | 1           | 1.130173723 | 1.172221153 | 1.212702209 | 1.528366636 |             |
|         | 1.232818884                                  | 1.73228838  | 1.691974855 | 1.357361001 | 1           | 0.761586733 |             |
|         | 0.743816594                                  | 0.497614983 | 0.525561928 | 0.824752891 | 1           | 1.039125777 |             |
|         | 1.671390644                                  | 0.755829797 | 0.978333935 | 1.628923766 | 1           | 1.323609868 |             |
|         | 1.184024399                                  | 1.082874268 | 1.607688969 | 2.03915714  | 1.604143183 |             |             |
| YNL215W | YNL215W::IES2::Hypothetical ORF              |             |             |             |             | 1           | 0.82508378  |
|         | 1.159987858                                  | 1.270652244 | 1           | 1.05001064  | 1.16655343  | 1.42431964  |             |
|         | 1.283937234                                  | 1           | 1.030027451 | 1.313281424 | 1.461884653 | 1.200595598 |             |
|         | 1.317076552                                  |             | 1.256127247 | 1.355369793 | 1           | 2.596857711 |             |
|         | 1.64350097                                   | 1.075795958 | 1           | 1.014119187 | 1.409047334 | 1.072945717 |             |
|         | 0.681974498                                  | 1.171716286 | 1           | 1.294625971 | 1.511754979 | 1.343918615 |             |
|         | 1.843569753                                  | 2.026686816 | 1           | 1.181232346 | 1.464228826 | 1.403120158 |             |
|         | 1.532161904                                  | 1.444690985 | 1.145316164 |             |             |             |             |
| YNL217W | YNL217W::YNL217W::molecular_function unknown |             |             |             |             | 1           | 1.59619991  |
|         | 1.4548168                                    |             | 1.674207617 | 1           | 1.457288802 | 1.37487102  |             |
|         | 1.559428337                                  | 1           | 1.153057556 | 1.418409291 | 1.001232278 | 1.570021987 |             |
|         | 1.428044388                                  |             | 1.256156316 | 1.407447911 | 1           | 0.928255978 |             |
|         | 1                                            | 1.314313832 | 1.768186109 | 1.222026033 | 1.067916494 | 1.700351129 |             |
|         | 1.27609976                                   | 1.848843013 | 1.092236178 | 0.89562791  | 1.167784738 | 1           |             |
|         | 1.484096052                                  | 2.029873612 | 1.358820959 | 1.871626549 | 1.340824434 | 1.542849457 |             |

YNL219C YNL219C::ALG9::catalyzes the transfer of mannose from Dol-P-Man to lipid-linked oligosaccharides 1 1.490979287 0.991537681 1.313805226  
 0.948562521 1 1.362460453 1.305670577 0.887618348 0.970121911 1  
 1.345260437 1.039393806 0.582804552 0.962029638 1 1.076380893  
 0.548870014 0.795090586 0.580766258 1 0.582820963 0.516703155  
 0.474428408 0.449944215 1 1.090846424 1.107596127 1.163663005  
 1.429010683 0.813996396 1 0.889373967 0.779079504 0.826956499  
 0.633499755 0.727030245 1 0.909346126 0.83285202 0.894261693  
 0.877091918 1.002431323 0.729394796  
 YNL233W YNL233W::BNI4::bud neck involved 1 0.998434823 1.047918282  
 1.339010731 1.27933729 1 1.373046432 1.357939753 1.116451392  
 1.014903034 1 1.020137275 1.024254859 0.725100997 1.484153586 1  
 0.659648123 0.761626612 0.697938343 1 0.684546606 0.902642644  
 0.554773242 1 0.943895581 1.034581149 1.07868883 0.928545017  
 1.000034392 1 1.199450191 1.021812274 1.10775313 1.239476617  
 0.731640069 1 1.118612031 1.024778643 1.343950439 1.084692672  
 1.062624031 0.862489653  
 YNL235C YNL235C::YNL235C::molecular\_function unknown 1 1.345871713  
 1.664132424 1.207613086 1.695937661 1 1.188251214 1.214929206  
 1.859335231 1.674053542 1 1.176258669 1.298751066 2.059964934  
 1.277301231 1 0.925008453 0.705972683 1.206154104 1.423817788 1  
 0.961107815 2.342866588 1.378680829 0.567615211 1 1.058070637  
 1.240483276 0.990737052 0.869365382 0.840338828 1 1.225004902  
 1.508703621 1.149651247 0.900227191 1.429746141 1 1.070167295  
 1.824518725 1.271657139 1.8777581 1.509649718 1.72410364  
 YNL237W YNL237W::YTP1::Yeast putative Transmembrane Protein 1  
 0.8796132 0.911765241 2.004134355 0.849957483 1 1.217669298  
 1.219883335 1.700077067 1.529143956 1 1.060800466 1.731879958  
 1.880697401 1.658877069 1 1.028605164 2.923726858 3.080867834  
 0.618653284 1 0.668208281 0.407531958 0.240021467 0.24452317 1  
 1.110258471 1.382732527 1.285457116 0.989713464 1.01890922 1  
 1.037164944 1.035705999 0.977175288 1.160297764 1.02923151 1  
 1.295924567 1.063275502 1.124703349 0.767540474 1.603156899 0.927285829  
 YDL131w "YDL131w::LYS21::homocitrate synthase, highly homologous to YDL182W"  
 1 1.0138986 0.762759972 0.721176661 0.456019002 1 0.798409759  
 0.784116284 0.579762801 0.607893817 1 1.632467837 1.330147093  
 0.459786954 0.740034123 1 5.287617893 4.822583309 2.049732733 1  
 1.361530313 1.362960098 2.278350144 2.208452618 1 1.150675982  
 0.914698833 1.305675986 1.243649643 0.877227371 1 1.176554657  
 1.106330666 1.023239197 0.804578075 0.817233432 1 1.696869816  
 1.35574888 1.756093089 1.000955644 0.675009502 1.175087415  
 YDL133w YDL133w::YDL133W::molecular\_function unknown 1 0.823746189  
 0.876864258 1.073018834 0.907127471 1 0.941372902 0.916206921  
 1.146480179 0.957529624 1 0.901006326 0.952150834 0.886537683  
 1.042940731 1 0.612198158 1.11315964 0.892555084 0.836120462 1  
 1.049659306 0.96735656 1.280587659 0.948744071 1 0.857095974  
 0.868739099 0.97965694 1.00130483 0.858089807 1 0.889579873  
 0.851757457 0.984214526 1.150532159 1.122924274 1 0.811089761  
 0.714288375 0.92065896 0.517575706 1.002926043 0.907146476  
 YDL147w "YDL147w::RPN5::Regulatory Particle Non-ATPase, homolog of mammalian proteasomal subunit p55"  
 1 0.64722555 0.899904527 0.957280897  
 0.996071866 1 0.862210809 0.867951625 0.995292986 0.849046064 1  
 0.86171908 1.231248553 1.006528814 0.864468799 1 1.48300747  
 1.487579899 1.248610597 1.446222346 1 1.56866703 1.422355962  
 2.370760002 1.583119607 1 1.013339339 1.328618724 0.876488909  
 0.606567797 0.967479384 1 1.301275639 1.752967915 1.544221045

0.97889918 1.134185203 1 1.310390427 1.509851118 1.042990152  
 0.944777704 1.251627758 1.492063293  
 YDL149w YDL149w::APG9::Integral membrane protein 1 0.961131079  
 1.058689105 1.072589374 0.954048358 1 1.144047807 1.22993546  
 1.010214243 0.960069236 1 1.186460446 1.386515964 1.022704128  
 1.021413841 1 1.33228235 1.150609879 1.41264778 1  
 0.9459839 1.161138649 0.916524865 0.777068831 1 1.242363183  
 1.347891615 1.09552629 1 1.290520622 0.912928103 1.249002332  
 0.973429317 0.685906764 1 1.534340109 1.432453049 1.326046682  
 1.071546572 1.42563041  
 YDL151c YDL151c::BUD30::Function required for yeast viability on toxin  
 exposure; random budding in diploid null mutants 1 0.840094861  
 0.981251474 1.031347298 1.007020642 1 1.054809564 1.025981731  
 1.205159225 1 0.511402022 0.637357877 0.49013495 1.146391915 1  
 0.479172108 0.510773372 0.702546802 1 0.65690088  
 0.710216606 1 0.763525601 0.716500137 0.746596476 0.792263694  
 0.819695684 1 0.887541881 0.900234764 1.341446676 1.240766901 1  
 0.554203844 0.497157536 0.950104304 0.620847307 0.743488004 0.882629006  
 YDL153c YDL153c::SAS10::part of small (ribosomal) subunit (SSU) processosome  
 (contains U3 snoRNA); Something About Silencing 10 1 0.620295475  
 0.624204096 0.852849726 0.931009105 1 0.675288828 0.625331615  
 0.9896345 1 0.577157455 0.412554604 0.382203183 0.956191023 1  
 0.431582084 0.199892272 0.389057918 1 0.60841009 0.486267393  
 0.351233148 0.599668212 1 0.751252739 0.641650201 0.483318873  
 0.641418879 0.781827843 1.12918212 0.977271846 0.848100426  
 1.177728953 1.477612622 1 0.889858521 0.903518147 1.155499092  
 0.714436955 0.852857756  
 YDL155W YDL155W::CLB3::Involved in mitotic induction and perhaps in DNA  
 replication and spindle assembly 1 0.777897482 0.843984498 0.964908751  
 0.92732501 1 0.978113192 0.919436043 0.80281065 0.866545983 1  
 0.765713997 0.748570153 0.51103624 0.978817643 0.889764468  
 0.75414935 0.82091629 1.006718859 1 1.148141428 0.878207454  
 0.7063057 1.203521812 1 1.021469433 0.944366508 0.88828872  
 0.903588947 0.904388326 1 0.916628372 0.926593922 1.158957286  
 1.078915513 1.260037867 1 0.90818082 0.947503683 1.130511082  
 1.018543412 1.06651008  
 YDL157c YDL157c::YDL157C::molecular\_function unknown 1 1.162423226  
 1.418456906 1.073018834 2.007781642 1 1.065899135 1.043169987  
 1.640954463 1.666031365 1 1.011925662 1.139287368 1.075092273  
 1.522841308 1 1.004930981 0.586530801 0.534769313 1.360959489 1  
 1.924685442 1.133086937 0.822349805 1.482840224 1 1.032902003  
 1.203469396 1.174519802 1.202337075 1.179078287 1 1.107225135  
 1.583563764 1.985581646 1.495581383 1.568281369 1 0.993087198  
 1.28979428 1.147702419 1.37624182 0.968415208 1.55948636  
 YDL171c YDL171c::GLT1::Glutamate synthase (NADH) 1 1.717963334  
 1.077128486 2.000167806 1.067625726 1 1.24198078 1.660818126  
 1.135455233 1.008312948 1 1.169405245 1.048763204 0.620135301  
 1.399500744 0.563872585 0.298026766  
 1 0.837878129 0.903431191 0.874313527 1.216789472 0.945938515 1  
 1.043184898 1.360698349 1.666281267 1.333836452 0.963325212 1  
 0.744849261 0.849099852 0.99912943 0.906431718 1.094797187 0.80732532  
 YDL173w YDL173w::YDL173W::molecular\_function unknown 1 0.984564597  
 1.125560755 1.049057392 0.977391169 1 1.046502501 0.991457144  
 0.979750541 1.091296836 1 0.721114052 0.845774147 1.033499649  
 1.039001431 1 1.177856333 0.991353864 1.05268857 1.184616465 1  
 1.133847482 1.560663492 1.031983176 1.797448146 1 0.652799223  
 0.781950309 0.672520361 0.777984923 0.800686324 1 0.885128693

0.868284293 1.18690503 1.183373593 1.025716099 1 0.809718924  
 0.750665692 0.807374716 1.073786863 1.12254992  
 YNL239W YNL239W::LAP3::aminopeptidase of cysteine protease family; bleomycin  
 hydrolase 1 1.279508076 0.952845694 1.313315122 0.917010497 1  
 1.353065811 1.068424868 1 1.38666199 1.473261083 1.205779125  
 0.989866175 1 1.622767116 1.97012495 1.709142086 1.04532609 1  
 1.258203538 0.721609728 0.674853005 0.869211817 1 1.330295443  
 1.257396111 1.970799352 1.282812019 1.022146819 1 1.206075204  
 1.278044386 2.557612267 2.127481187 0.687543999 1 1.10042322  
 1.206803622 1.723364116 0.74992355 0.943907568 0.884380232  
 YNL241C YNL241C::ZWF1::Glucose-6-phosphate dehydrogenase 1  
 1.194797251 1.039078767 0.889604783 0.468225163 1 1.315161129  
 1.262832943 0.65984429 1 1.800873724 1.80758066 1.427360871  
 0.533067256 1 1.364819015 1.70807586 1.915926021 1.045841809 1  
 0.868569757 0.821216693 0.653985036 0.691487737 1 1.239800933  
 1.512507199 1.944177855 1.312329784 1.121114118 1 1.294500684  
 1.108896187 1.455743396 1.301485264 0.36762621 1 1.321584313  
 0.882257677 1.074449359 0.423813908 0.833593594 0.553394393  
 YNL243W "YNL243W::SLA2::Protein involved in membrane cytoskeleton assembly,  
 required for cell polarization and endocytosis" 1 1.031715986 1.185795585  
 1.370391782 0.992009501 1 1.508207374 1.502015517 0.998056888 1  
 1.372551269 1.559850712 0.923022469 1.251248181 1 1.224417053  
 0.927716248 0.935516291 0.731655696 1 1.132664617 0.977811196  
 0.705579619 0.974113251 1 1.128268925 1.081952722 1.156987626  
 0.942879545 0.859733295 1 1.231977554 0.896359619 1.339689952  
 1.093555208 0.517356716 1 1.136301042 0.98799527 0.825687398  
 0.708780155 1.031763159 0.767922225  
 YNL257C YNL257C::SIP3::Interacts with SNF1 protein kinase 1  
 1.036953134 0.938492199 1.253180963 1.18984346 1 1.273261311  
 1.180807856 0.943339695 1 0.932016995 1.044864233 0.566621102  
 1.080562311 1 1.096769705 0.79348152 0.937525334 0.920290951  
 1.038436987 0.934831112 0.766906106 0.977333454 1 1.072973618  
 1.15005643 1.107814576 1.060974762 1.201948096 1 1.194018924  
 0.757474601 1.206145041 1.088647586 0.603685917 1 1.160618029  
 1.047847154 1.246219852 0.890822275 1.004330733 0.815205939  
 YNL259C "YNL259C::ATX1::antioxidant protein and metal homeostasis factor,  
 protects against oxygen toxicity" 1 1.565457073 2.203645908 1.416612762  
 2.848062642 1 1.496033418 1.305673657 2.306189665 1  
 1.462797402 2.214515185 2.997538246 2.032184495 1 0.936619189  
 0.624175834 0.763309709 1.872838644 1 2.560005062 3.778478872  
 3.432345389 1.799795111 1 0.879341042 1.367071939 0.9212247  
 0.733040874 0.990921644 1 1.511362099 3.218103189 3.382824056  
 3.449968158 2.831569763 1 1.286351376 2.227105535 1.666710098  
 1.858152401 1.628126668 1.769636024  
 YNL261W YNL261W::ORC5::May be subunit of origin recognition complex (ORC)  
 that mediates the ATP-dependent binding to origins; the ORC binds to origins of  
 replication and thereby directs DNA replication and is also involved in  
 transcriptional silencing 1 1.039541875 1.084522052 1.00087448  
 1.165627032 1 1.21328294 0.823779623 1.102513891 1  
 1.029376342 0.923253737 0.872703526 1.064019434 1 1.030187704  
 1.20633986 1.347189493 1.672126082 1 1.234984004 1.295450497  
 1.316186584 1 1.170947487 1.283189933 0.949247056 0.924769206  
 0.841875952 1 0.995888341 1.237311624 1.146765708 1.147597653  
 1.019109839 1 1.182029083 1.34688447 1.22481777 1.234673267  
 1.11581656 1.165455518  
 YNL263C "YNL263C::YIF1::Yip1-Interacting Factor, shows similarity to NADH  
 dehydrogenases" 1 1.296548141 1.048265049 0.996182682 0.762414823 1

|             |                                                                                                                                                           |             |             |             |             |
|-------------|-----------------------------------------------------------------------------------------------------------------------------------------------------------|-------------|-------------|-------------|-------------|
| 1.216893401 | 1.164436378                                                                                                                                               | 0.802277826 | 0.899268654 | 1           | 1.306402643 |
| 1.24424053  | 1.170943094                                                                                                                                               | 0.986968172 | 1           | 0.706177116 | 0.542006102 |
| 0.599087819 | 0.734940058                                                                                                                                               | 1           | 0.796785332 | 0.471794528 | 0.481934037 |
| 0.619256722 | 1                                                                                                                                                         | 1.132523944 | 1.0341362   | 0.930977665 | 1.185020293 |
| 1.124607728 | 1                                                                                                                                                         | 1.371914543 | 0.79145791  | 1.278294316 | 0.764477461 |
| 0.496801655 | 1                                                                                                                                                         | 1.1025618   | 0.858539586 | 0.728834152 | 1.071248671 |
| 0.79754187  | 1.190848653                                                                                                                                               |             |             |             |             |
| YNL265C     | YNL265C::IST1::Similar to Nuf1p (spindle pole body component)                                                                                             |             |             |             | 1           |
| 1.058411864 | 1.311527993                                                                                                                                               | 1.20786228  | 1.734230007 | 1           | 1.158092749 |
| 1.004403137 | 1.363698429                                                                                                                                               | 1.404810268 | 1           | 1.011756837 | 1.238362095 |
| 1.652799879 | 1.304756826                                                                                                                                               | 1           | 1.547756864 | 1.402225983 | 1.888547877 |
| 1.760910206 | 2.130552723                                                                                                                                               | 1.501049174 | 1.256016991 | 1           | 1.407790615 |
| 1.856783085 | 1.360742964                                                                                                                                               | 0.854114495 | 1.202463915 | 1           | 1.302713999 |
| 1.759205617 | 2.069311175                                                                                                                                               | 1.210113675 | 1.086970465 | 1           | 1.708983164 |
| 1.881649206 | 1.261495776                                                                                                                                               | 1.552009229 | 1.355057873 | 1.685576158 |             |
| YNL267W     | "YNL267W::PIK1::catalyzes first step in the biosynthesis of phosphatidylinositol-4,5-biphosphate; may control cytokineses through the actin cytoskeleton" |             |             |             | 1           |
| 0.877767884 | 0.925490262                                                                                                                                               | 0.621512397 | 0.61596596  | 1           | 0.80479192  |
| 0.801467405 | 0.421648316                                                                                                                                               | 0.875260424 | 1           | 0.92601761  | 0.613587361 |
| 1.046787657 | 0.857115126                                                                                                                                               | 1           | 0.791899032 | 0.906520816 | 0.747921482 |
| 0.585014664 | 1                                                                                                                                                         | 0.849175542 | 0.803876244 | 0.623630958 | 0.819937402 |
| 0.915285078 | 1                                                                                                                                                         | 1.170074829 | 0.628895434 | 0.71981688  | 0.76923562  |
| 0.622328775 | 1                                                                                                                                                         | 0.867976295 | 0.721447861 | 0.885295892 | 0.820564753 |
| 0.911173031 | 0.839723408                                                                                                                                               |             |             |             |             |
| YNL281W     | YNL281W::HCH1::high copy Hsp90 supressor                                                                                                                  |             |             |             | 1           |
| 1.226495483 | 0.994010416                                                                                                                                               | 1.3815486   | 1           | 0.994817721 | 0.945847172 |
| 1.347029445 | 1.28409025                                                                                                                                                | 1           | 0.807335896 | 1.024989969 | 1.669455882 |
| 1.083901585 | 1                                                                                                                                                         | 1.114586383 | 1.18972362  | 1.596527617 | 2.679780908 |
| 0.562190632 | 1.468189937                                                                                                                                               | 1.988400466 | 1.507712798 | 1           | 1.224961226 |
| 1.491858981 | 1.4770121                                                                                                                                                 | 1.607098714 | 1.496371545 | 1           | 1.584180704 |
| 1.40186152  | 0.985204854                                                                                                                                               | 0.718772139 | 0.807859537 | 1           | 1.683512626 |
| 1.513332563 | 1.117749126                                                                                                                                               | 1.675484946 | 1.306520256 | 1.323943457 |             |
| YDL175c     | YDL175c::AIR2::<u>a</u>rginine methyltransferase-<u>i</u>nteracting <u>R</u>ING finger protein                                                            |             |             |             | 1           |
| 0.979320924 | 1                                                                                                                                                         | 1.068014435 | 1.025374494 | 0.978085954 | 1.121001898 |
| 1.008979716 | 0.938476768                                                                                                                                               | 0.98276531  | 1.162526988 | 1           | 0.992951574 |
| 0.797263578 | 1.041285879                                                                                                                                               | 1.404992043 | 1           | 1.653983302 | 1.604914195 |
| 1.447289591 | 1                                                                                                                                                         | 1.064966774 |             |             | 1           |
| 0.898917281 | 0.969702036                                                                                                                                               | 1.040263554 | 1.043524158 | 1.202553788 | 1           |
| 0.80133436  |                                                                                                                                                           | 0.853507836 | 0.965875746 | 1.203983    |             |
| YDL177c     | YDL177c::YDL177C::not yet annotated                                                                                                                       |             |             |             | 1           |
| 1.484015886 | 1.996848384                                                                                                                                               | 1           | 1.273665438 | 1.419157039 | 1.742320739 |
| 1.724019403 | 1                                                                                                                                                         | 1.172444224 | 1.398962012 | 1.724252532 | 1.416084809 |
| 0.885834502 |                                                                                                                                                           | 1.026234754 | 1.651065827 | 0.488950125 | 0.521090044 |
| 0.362251052 | 0.215252531                                                                                                                                               | 1           |             | 0.726457065 | 0.822867726 |
| 0.727305414 | 1.207161006                                                                                                                                               | 1.000642947 |             | 2.732112986 | 1           |
| 1.162397372 |                                                                                                                                                           | 1.284895504 |             |             |             |
| YDL179w     | YDL179w::PCL9::PHO85 cyclin                                                                                                                               |             |             |             | 1           |
| 0.803974521 | 1                                                                                                                                                         | 0.938004236 | 0.922280135 | 0.892828507 | 0.989280222 |
| 0.706624546 | 0.783266268                                                                                                                                               | 0.774101122 | 0.665697618 | 1           | 1.149877615 |
| 0.980612293 | 1                                                                                                                                                         | 0.834283262 | 0.809044092 | 1           | 0.770943999 |
| 0.880752726 | 0.639695635                                                                                                                                               | 0.694558508 | 0.951120646 | 1           | 0.725056476 |
| 0.692131227 |                                                                                                                                                           | 0.428857559 | 1.00151276  |             | 1.035147451 |
| 1.429361274 | 0.988579451                                                                                                                                               |             |             |             |             |
| YDL181W     | YDL181W::INH1::ATPase inhibitor                                                                                                                           |             |             |             | 1           |
| 1.507984226 | 2.396431892                                                                                                                                               | 1           | 1.572458452 | 1.840705325 | 2.550869337 |

|             |                                                                                                |             |             |             |             |               |
|-------------|------------------------------------------------------------------------------------------------|-------------|-------------|-------------|-------------|---------------|
| 2.538647673 | 1                                                                                              | 1.173778587 | 1.323087592 | 3.385099651 | 1.613278832 | 1             |
| 1.170549123 | 0.904979856                                                                                    | 0.904724123 | 1.751819206 | 1           | 1.587409538 |               |
| 2.227962965 | 1.518212129                                                                                    | 1.057168659 | 1           | 0.834107027 | 0.73822081  |               |
| 0.423618154 | 0.616570196                                                                                    | 0.747674706 | 1           | 0.730950844 | 0.590444298 |               |
| 0.508165709 | 0.412268516                                                                                    | 1.366666786 | 1           | 1.088963594 | 0.816781398 |               |
| 2.171481731 | 2.009966325                                                                                    | 1.597138177 |             |             |             |               |
| YDL195W     | YDL195W::SEC31::involved in protein transport from endoplasmic reticulum to Golgi              | 1           | 0.803431649 | 0.739363969 | 0.945703652 | 0.458569612 1 |
| 1.185818132 | 1.123276346                                                                                    | 0.46960953  | 0.502459877 | 1           | 1.162660408 |               |
| 0.948643916 | 0.599439435                                                                                    | 0.66830677  | 1           | 0.793409818 | 0.758120717 |               |
| 1.064174132 | 0.446909927                                                                                    | 1           | 0.386513116 | 0.33988408  | 0.410173541 |               |
| 0.404656726 | 1                                                                                              | 1.053967241 | 0.736580235 | 0.913012554 | 1.05881815  |               |
| 0.65869543  | 1                                                                                              | 0.888910035 | 0.419479943 | 0.661433479 | 0.74533841  |               |
| 0.378875671 | 1                                                                                              | 0.771038916 | 0.617493288 | 0.765412676 | 0.54415256  |               |
| 0.686760189 | 0.421175149                                                                                    |             |             |             |             |               |
| YDL197C     | YDL197C::ASF2::anti-silencing protein that causes depression of silent loci when overexpressed | 1           | 0.661078521 | 0.93719474  | 0.898531266 |               |
| 0.922831286 | 1                                                                                              | 0.856774542 | 0.98512541  | 0.923630806 | 1.050196615 | 1             |
| 0.852107141 | 0.980306206                                                                                    | 1.303148039 | 1.117587955 | 1           | 1.054855264 |               |
| 0.771841617 | 1.296509033                                                                                    | 1.291237629 | 1           | 1.141717884 | 2.108767958 |               |
| 1.934062908 | 0.836027868                                                                                    | 1           | 1.090106591 | 1.084378913 | 1.209820654 |               |
| 0.928175735 | 1.303784173                                                                                    | 1           | 0.895194738 | 0.686354602 | 0.986983103 |               |
| 0.980239006 | 0.660830374                                                                                    |             | 1.022648373 | 0.938717923 | 1.18553963  |               |
| 0.724500298 | 1.034081101                                                                                    | 0.935166396 |             |             |             |               |
| YDL199c     | YDL199c::YDL199C::molecular_function unknown                                                   | 1           |             |             | 1.370777544 |               |
| 1.20660663  | 1.441292187                                                                                    | 0.902452347 | 1           | 1.527290578 | 1.71972001  |               |
| 0.886093395 | 0.909847188                                                                                    | 1           | 2.265483774 | 2.997258929 | 2.926756654 |               |
| 1.440358731 | 1                                                                                              | 1.649476164 | 0.941838741 | 1.803637175 | 0.954979466 | 1             |
| 1.009392451 | 1.344693607                                                                                    | 1.436881181 | 0.909211732 | 1           | 1.100457219 |               |
| 0.974682847 | 1.055806941                                                                                    | 1.10988006  | 0.819612803 | 1           | 1.229146358 |               |
| 0.958518668 | 1.406102529                                                                                    | 1.160127718 | 0.726257741 | 1           | 0.922854918 |               |
| 0.903342562 | 1.000720558                                                                                    | 0.671153585 | 1.280521599 | 0.777554122 |             |               |
| YDL201w     | YDL201w::TRM8::Transfer RNA methyltransferase                                                  | 1           |             |             | 0.90447101  |               |
| 0.907583222 | 0.813032537                                                                                    | 1.390854973 | 1           | 0.846534932 | 0.78332237  |               |
| 1.328896777 | 1                                                                                              | 0.60388661  | 0.49927042  | 0.693028449 | 1.087368152 | 1             |
| 0.411593268 | 0.280380636                                                                                    | 0.301315038 | 0.54138865  | 1           | 0.666073987 |               |
| 0.533353465 | 0.526038924                                                                                    | 0.869637135 | 1           | 0.937082776 | 0.656261844 |               |
| 0.58627056  | 0.781327392                                                                                    | 0.792622687 |             | 1.284594099 | 1.169562017 |               |
| 1.109981594 | 1.241464879                                                                                    | 1.519720745 | 1           | 0.888590594 |             | 0.837604784   |
| 1.172656861 | 0.686862435                                                                                    | 1.507824531 |             |             |             |               |
| YDL203c     | YDL203c::YDL203C::molecular_function unknown                                                   | 1           |             |             | 0.790347092 |               |
| 0.816596611 | 0.824846293                                                                                    | 0.732276994 | 1           | 0.883328412 | 0.892021692 |               |
| 0.778230153 | 0.793488468                                                                                    | 1           | 0.797868866 | 0.832494044 | 0.765588535 |               |
| 0.790730997 | 1                                                                                              | 1.004087489 | 0.733585087 | 0.973011666 | 0.991676724 | 1             |
| 1.115206184 | 1.399971848                                                                                    | 0.800538135 | 0.964080253 | 1           | 0.818471387 |               |
| 0.869145572 | 0.974421049                                                                                    | 1.009693752 | 0.956170518 | 1           | 0.922704856 |               |
| 0.686879229 | 1.039272479                                                                                    | 1.042667167 | 0.720165916 | 1           | 0.6362395   |               |
| 0.619138565 | 0.910051368                                                                                    | 0.631892144 | 0.804056706 | 0.838847796 |             |               |
| YDL205C     | YDL205C::HEM3::catalyzes the third step in heme biosynthesis                                   |             |             |             |             | 1             |
| 0.90222941  | 0.962927088                                                                                    | 1.15312399  | 0.622693217 | 1           | 1.100741434 |               |
| 1.085233647 | 0.94616167                                                                                     | 1.066572515 | 1           | 1.009196757 | 0.898837383 |               |
| 0.972223665 | 1.013765231                                                                                    | 1           | 1.074863563 | 0.39228388  | 0.911977731 |               |
| 0.704247415 | 1                                                                                              | 0.916126186 | 0.579589433 | 0.445578662 | 0.822187346 | 1             |
| 0.775447776 | 0.6564327                                                                                      | 0.636717129 | 1.137653858 | 0.83029599  | 1           |               |
| 0.901614569 | 0.311457419                                                                                    | 0.594724371 | 0.943890137 | 0.46738561  | 1           |               |
| 0.509550808 | 0.368220999                                                                                    | 0.810910081 | 0.515401367 | 0.670409263 | 0.682111082 |               |

YNL283C YNL283C::WSC2::cell wall integrity and stress response component 2  
 1 0.908936234 0.568642483 0.929424547 0.64035422 1 0.904571153  
 0.938334649 0.717335745 1 1.126851994 0.885491638 0.759154132  
 0.832696046 1 1.424990329 0.892590847 1.271657953 0.697724534 1  
 0.509007393 0.715068894 0.343035259 0.514064394 1 1.19818635  
 0.930382145 1.038536512 1.382977686 0.737692446 1 0.621705183  
 0.60637041 0.801799937 0.807038452 0.46730748 1 0.895584382  
 0.751062038 0.855043919 0.795164064 0.796045151 0.631324918  
 YNL285W YNL285W::YNL285W::molecular\_function unknown 1 1.234313708  
 1.399185569 1.513348645 1 1.223748589 1.029701442 1.49562568 1  
 1.198593403 1.336730648 1.974479778 1.433514254 1 1.262268293  
 1.378197416 1.284078258 1.264623644 1 0.559947952 0.85240694 0.565076  
 0.426239573 0.495307257 0.628422751 0.585611193 0.798988099 1  
 0.575333669 0.870428528 1.157765078 1.362206976 1.102852164 1  
 1.144523192 1.315442141 1.288875038 1.166439948 1.243921302 1.730232981  
 YNL287W YNL287W::SEC21::non-clathrin coat protein involved in transport  
 between ER and Golgi 1 1.270656284 0.992286912 1.612295444 1.109662226 1  
 1.555565363 1.069355837 0.987245985 1 1.250378665 1.110567064  
 0.75839923 1.054326431 1 1.252258306 1.008963138 0.854287883 1  
 1.131987166 0.48303816 1 1.05015808 0.944117136  
 1.236391737 1.18009936 0.974310759 1 1.103483645 0.630486004  
 0.940627946 0.724699523 0.331579261 1 1.028054284 0.767471724  
 0.879640492 0.701376015 0.850684492 0.584916817  
 YNL289W YNL289W::PCL1::G(sub)1 cyclin that associates with PHO85 1  
 0.781603031 1.238770085 0.972118495 1.155372348 1 1.039082985  
 1.029679393 1.695098502 1 0.68450009 0.707948733 1.094286613  
 1.617753253 1 0.411168456 0.404509678 0.309328726 1.885946481 1  
 0.641640716 0.88441356 0.584282856 2.1375865 1 0.638327641  
 0.66291084 0.871808083 0.679759344 1.010462558 1 0.701858559  
 1.035252691 1.03391175 1.134381122 0.993457388 1 0.854793447  
 0.929465918 1.328809671 1.062549519 1.596232057 1.003465128  
 YNL291C YNL291C::MID1::N-glycosylated integral plasma membrane protein 1  
 0.864062162 0.778068284 0.81439384 0.857365554 1 0.877923404  
 0.89734393 0.854519013 1 0.869371372 0.705614292 0.536655567  
 0.897609873 1 0.748150515 0.623602523 0.66615708 0.864320213 1  
 0.670902758 0.863756898 0.754785321 1.0783674 1 1.130238909  
 1.008538074 0.964415046 1.162731503 0.937451044 1 1.028224556  
 1.069523842 1.045111008 0.950305854 0.922601788 1 1.006165541  
 1.06193751 1.007232675 1.015692269 1.020675977 0.851106531  
 YNL305C YNL305C::YNL305C::molecular\_function unknown 1 1.317822126  
 1.180096974 1.003835624 0.90186446 1 1.27592629 1.435956374  
 1.099271244 1 1.600221311 1.62980956 2.631666728 1.122470761 1  
 2.508322169 2.37246842 2.688618501 2.729810032 1 1.590291676  
 2.119110139 2.053612438 1.150279264 1 1.076269872 1.431987624  
 1.368325717 1.107683042 0.926232706 1 1.084282685 1.26129201  
 1.571756769 1.251645172 0.710570809 1 1.276540779 1.055074001  
 0.979437012 0.648510035 1.18893229 1.042868171  
 YNL307C "YNL307C::MCK1::Disp. for mitosis, required for chr. segregation,  
 benomyl resist., basal IME1 transcript. in mitosis, IME1 induction in meiosis &  
 ascus mat. independ. of IME1; maybe in mitotic chr. segregation specific to  
 CDEIII" 1 1.144177934 0.954234664 0.929808784 0.842842926 1  
 1.161614243 0.691805767 1 1.179706303 0.895519631  
 0.671026954 0.665579608 1 1.191165633 0.855106197 0.634427541  
 0.607921778 1 0.546728516 0.260243039 0.332998217 0.557253731 1  
 0.986307188 0.97365472 1.004418639 1.129680923 0.668139886 1  
 0.769853363 0.795854112 0.853649893 0.709180616 0.403228691 1  
 0.944365201 0.651692764 0.773514202 0.708789923 0.883316178 0.610309951



YNL309W YNL309W::STB1::binds Sin3p in two-hybrid assay and is present in a large protein complex with Sin3p and Stb2p 1 0.723616818 0.936520862  
0.669223762 0.543552702 1 0.818796842 0.925552461 0.742836823  
0.653588766 1 0.795782092 0.738923324 0.732592632 0.703786018 1  
0.543905184 0.479304655 0.574591119 0.755554189 1 0.605508486  
1.086403469 0.802548604 1.139774495 1 1.067846719 1.079524903  
1.315923255 1.083938342 1.175894243 1 0.79618417 0.663949673  
0.91509831 1.205643723 0.815460877 1 0.735481654 0.682572865  
1.118625075 0.570837308 0.714794893 0.650588607  
YNL311C YNL311C::YNL311C::molecular\_function unknown 1 1.079254583  
0.923337943 1.186601206 0.986805157 1 1.139563325 1.123219996  
0.868269041 0.925718173 1 1.440474521 0.954708813 0.598714905  
1.036881637 1 1.001599294 0.909044436 0.823316179 1  
0.766042961 0.789930847 0.551489604 0.839381979 1 1.1194438  
0.987344344 0.929730257 1.030832058 0.968428555 1 0.921782284  
0.800785089 0.829823296 0.827374336 0.615339534 1 0.938969251  
0.844646783 1.025852028 0.893172991 0.826899276 0.723265402  
YNL313C YNL313C::YNL313C::molecular\_function unknown 1 0.821621065  
0.653217006 0.961613624 0.67487863 1 0.958231227 0.80489023  
0.697421822 0.841886324 1 0.601539595 0.461670674 0.325793563  
1.100708516 1 0.313014427 0.229864313 0.293443542 0.67478004 1  
0.422281736 0.39458353 0.291445174 0.717730602 1 0.729881323  
0.633972203 0.759411346 0.992274427 1.065439566 1 1.137123967  
0.564854829 0.603362801 0.97469955 0.565402433 1 0.500319742  
0.490295363 0.716694688 0.619153974 0.399335862 0.716260448  
YDL219w YDL219w::DTD1::D-Tyr-tRNA(Tyr) deacylase 1 0.836004048  
1.02015956 0.880961754 1.166086133 1 0.813729702 0.843836242  
1.400128978 1.287417462 1 0.705024237 0.975529363 0.950497073  
1.11135846 1 0.664886035 0.377465393 0.493928547 1.195045215  
0.413279273 0.693295785 0.445847457 0.289177647 1 1.092371368  
1.155147478 1.196849942 0.853018085 1.154518569 1 1.010805881  
1.351898978 1.126396685 1.068684335 1.018615495 1 1.007168342  
1.059949393 1.145988644 0.950949213 0.893308181 1.20660989  
YDL221w YDL221w::YDL221W::molecular\_function unknown 1 1.197231839  
1.186414724 1.073442006 1.116390092 1 1.284386791 1.300551829  
1.368483271 1.39768444 1 1.257371748 1.100739271 1.169053169 1  
0.754798494 1.256818315 1.059018692 1 0.611919295 1.834788445  
1.009734089 0.241956225 1 1.152681234 1.141845483 1.362397853  
1.009327672 1.121285104 1 1.01485298 1.24792625 0.918481204  
1.082339494 0.863799214 1 0.777799416 1.091742516 0.936662774  
1.025471721 0.773980177 0.800320314  
YDL223c YDL223c::HBT1::Hub1 target 1 1.022545227 1.388941542  
2.804493738 1.509341957 1 1.3887231 2.155670556 2.240183176  
2.498602774 1 1.254916847 2.759281381 5.341867267 3.312234759 1  
1.277357588 6.186386516 0.449368471 0.630675528  
0.53378279 1 1.008519978 0.949550408 1.225763836 0.890364708  
0.914870583 1 0.881742409 1.200368698 0.881525099 1.299424129 1  
0.809839468 0.953948728 1.153981831 1.264776985 1.348348031 1.596262512  
YDL225w YDL225w::SHS1::Interacts with Spa2p and plays a role in cytokinesis  
1 0.676582397 0.837625729 0.865246364 0.933544125 1 0.792096547  
0.781269521 0.906198722 0.795114431 1 0.69735282 0.803603501  
0.748985076 0.964937048 1 1.136301301 0.916581735 1.096358981  
1.290716237 1 1.480966021 1.838263602 1.74437541 1.442410341 1  
1.1387373 1.212853481 1.126620424 0.968559927 1.188342404 1  
1.063720445 1.246919695 0.773719242 0.846052249 0.811315773 1  
1.114044822 1.080177168 1.067239302 1.119441192 1.057186183 1.28366475

YDL227C YDL227C::HO::Homothallic switching 1.158641048 0.904221526  
0.995149924 0.991695608 0.879803981 0.973860319  
1.105564539 0.794345453 1.036749366  
1 0.903197288 0.858002102 1.226341925  
0.917945893 1.123130885 1 1.243025293 1.531723669 1  
0.43563959 0.925065809 0.608501352 0.74238354 0.725801733 0.944798293  
YDL229W "YDL229W::SSB1::Stress-Seventy Subfamily B; involved in translation,  
perhaps by guiding the nascent chain through the ribosome" 1 1.751257486  
1.371145915 0.849196803 0.991699319 1 1.123233691 0.99278208  
0.903845032 0.959314288 1 2.368600958 0.925962894 0.588559462  
0.766885321 1 1.037554848 0.520073498 0.36404159 0.765414098 1  
1.373954068 1.033693336 0.44630968 0.768749982 1 0.884902167  
0.727034429 1.136878472 1.177453641 0.960801995 1 1.262088823  
0.702035099 0.578963782 0.713667658 0.588117456 1 0.721904451  
0.507663561 0.576323472 0.676734886 0.391344439 1.003465128  
YDL243c YDL243c::AAD4::high degree of similarity with the AAD of P.  
chryso sporium 0.999805015 1.30934897 0.999527376  
0.943157093 0.856737929 0.922186053 1.24782908 0.8271347  
1.072971901 1.220168666  
1 0.74751102 0.692268699 0.847504788 0.780893745 0.698708655 1  
1.89318657 1 0.509005834 0.68196017 0.699057899  
0.523687019  
YDL245C YDL245C::HXT15::High-affinity hexose transporter 1  
0.881857801 0.917984429 1.244681437 0.957774019 1 1.042826986  
1.163037902 0.976251907 1.001080595 1 1.082458387 1.11601808  
0.891638255 1.176848854 1 0.786599879 0.756189954 1.097674366  
0.914629532 1 1.188601848 1.482828882 0.923811007 1  
1.045685075 1.150921875 1.272433771 1.338518493 1.148236999 1  
0.733550387 0.824901954 0.782053729 0.7858886 0.804565086 1  
0.673355895 0.595788582 0.704132357 0.644813125 1.132970156 1.162828628  
YDL247w "YDL247w::MPH2::Maltose Permease Homologue. Maltose transporter  
family member, able to transport hexoses. Capable of transporting maltose,  
maltotriose, alpha-methylglucoside and turanose." 1 1.059413058  
0.822489901 1.285448587 0.773105946 1 1.097165792 1.181545755  
0.856883483 0.725645483 1 0.902707882 0.84294204 0.785769695  
1.011428879 1 0.592558859 0.615613166 0.713081578 1  
0.770141501 1.273522048 0.851770965 0.874298727 1 0.811796506  
0.789962996 1.133565882 0.692102117 0.728852966 1 0.735412426  
1 0.767943547 0.887038616 0.770466391 0.787141106  
0.682885954 1.063883189  
YDR001C YDR001C::NTH1::hydrolyzes trehalose; may be involved in growth  
transition from glucose to glycerol; shows significant sequence similarity to  
Nth2p 1 0.969041598 1.349602867 1.516281726 1.04133957 1 1.564399288  
1.773327411 1.1932302 1.081863282 1 1.359547372 2.01138342  
2.043731693 1.32374215 1 2.717579405 3.085102538 3.803814191  
1.942923629 1 1.812815843 1.567509668 1.744392211 2.197845029 1  
1.151176261 1.467544016 0.827359154 1.019180308 1 1.358251409  
0.897412602 1.407596487 1.370296767 0.898302004 1 1.079493316  
1.164835124 1.08530685 1.658481511 1.270864601 1.029733823  
YNL315C YNL315C::ATP11::essential for assembly of a functional F1-ATPase;  
binds the beta subunit of F1-ATPase. 1 0.774411544 0.899938027  
1.097980687 1.070553835 1 0.989925374 1.162140242 1.19782716 1  
0.809643042 0.933489787 0.949525414 0.958353967 1 1.542762349  
1.411142941 1.100856043 1.54958632 1 1.442553121 1.32297399  
1.352585557 1.466003668 1 0.962626756 1.034797515 1.104491833  
0.834876045 1 1.242670275 1.230826192 1.2982559 0.782128038

0.797426747 1 1.559645752 1.195312343 0.936370986 0.878537374  
 1.38770489 0.999087012  
 YNL329C YNL329C::PEX6::Required for peroxisome assembly 1 0.723966966  
 0.619047104 1.014798456 0.590986432 1 0.931808775 1.040366025  
 0.684049314 0.681980194 1 0.852140891 0.772153236 0.462049081  
 0.933296297 1 1.084638956 0.76141165 1.206277762 0.708882726 1  
 0.49077275 1.086597951 0.583019603 0.504416364 1 0.822722886  
 1.001887105 1.21809134 1.145668986 0.943306748 1 0.977160723  
 0.710553397 1.000735459 0.886766623 0.664103036 1 0.843571749  
 0.781735474 0.87982891 0.869057784 0.956560569 0.657593613  
 YNL331C YNL331C::AAD14::aryl-alcohol dehydrogenase located on chromosome 14  
 1 0.845155707 0.735362866 0.832306421 0.864096615 1 0.835968719  
 0.914768004 0.978181858 1.002921966 1 2.474056184 2.786830562  
 1.575688683 0.954706917 1 3.544570624 4.006239803 3.748459911  
 2.467363167 1 2.595331541 2.607682585 2.331041489 1.642438513 1  
 1.736495846 3.455613253 3.547172597 1.241441935 1.315188861 1  
 1.993182412 4.202673546 7.91878431 4.972029007 1.161394139 1  
 2.941107981 3.745723812 2.804501891 1.061225719 0.985016629 1.240759256  
 YLR286C YLR286C::CTS1::Endochitinase 1 0.942847898 0.625458188  
 0.83545917 0.637932091 1 0.830566299 0.818426819 0.479973337  
 0.662608773 1 1.040053446 0.744503302 0.394395455 0.717351775 1  
 1.103248733 1.124937049 0.47212801 1 0.370637677 0.194502562  
 0.184393226 0.45986539 1 1.014372163 0.739908676 1.211864148  
 1.268621445 0.839649874 1 0.717530965 0.689963187 1.106803328  
 0.335151536 0.319122451 1 0.802917898 0.688820646 1.126759208  
 0.550532558 1.056695214 0.459702579  
 YNL333W YNL333W::SNZ2::Snooze: stationary phase-induced gene family 1  
 1.319549772 1.401964351 1.26958542 1 1.19827359 1.470563579  
 1.826236282 2.145990897 1 1.088913926 1.530115407 1.864308419  
 2.287063593 1 0.876231578 0.754202886 0.967492029 2.030366105 1  
 0.904348017 1.646929253 1.490607289 1.349747134 1 1.044089636  
 0.983113033 1.240845098 0.921586197 0.83850241 1 0.75328338  
 0.870449321 1.063963852 0.835670808 1.270230579 1 0.793164464  
 0.952727958 0.9977584 0.869510656 0.97879541 1.346709701  
 YLR288C YLR288C::MEC3::Involved in checkpoint control and DNA repair 1  
 0.975630311 1.043505669 1.28384908 1 1.118374969  
 1 0.798213671 0.748915833 1.223725973 1 0.686120667  
 0.750281044 0.882076231 1 1.666427149 0.889743002 0.868412407 1  
 0.990245016 1.016100205 0.930422941 0.872048627 1.051001009 1  
 0.972908646 0.798876197 1.35669427 1 1.063970396  
 0.967275967 1.103106352 1.214545584 0.985952665  
 YNL335W YNL335W::YNL335W::molecular\_function unknown 1 0.71588462  
 0.331061032 0.611861759 1.037923677 1 0.579708179 0.974277314  
 0.88988626 1 7.463252249 53.06820443 209.7402964 110.2565333 1  
 1.690036912 5.004076363 13.17338202 12.9290407 1 1.03651994  
 1.595528791 1.286142822 2.109598314 1 1.751811965 3.227419244  
 5.915865108 4.408703741 1 0.335541309 0.869132863 1.998960717  
 2.351725613 3.471378037 1 17.28131532  
 YLR290C YLR290C::YLR290C::molecular\_function unknown 1 0.909905986  
 1.39809625 1.036868415 1.631254215 1 1.039021741 1.044724602  
 1.286305439 1 1.024589336 1.261970252 1.729897502 1.23221719 1  
 1.831204804 1.135378769 1.595122021 2.608976731 1 2.447826893  
 3.095217869 3.75880919 1.798311614 1 0.972460936 1.095375645  
 0.802995835 0.774617574 1.072821431 1 1.055184081 1.003644045  
 0.963356428 1.111857848 1.478493976 1 1.204277444 1.092798575  
 1.341800182 1.82236135 1.328321573

YNL337W YNL337W::YNL337W::molecular\_function unknown 1 1.05875963  
 1.186852796 0.876744479 0.833195566 1 1.070332695 1.057840168  
 0.952477606 1 1.012867217 1.145309126 1.82742501 0.888043352 1  
 1.374685229 1.334581458 2.630814323 1.244075979 1 0.786773956  
 2.203947097 1.24530977 0.67604774 1 1.168683748 0.966706846  
 0.8833739 1.023641299 1 0.583529546 0.573895344 0.654395029  
 0.719909006 0.86166354 1 0.872500444 0.870696595 1.124303447  
 0.956991946 1.112004837 0.907146476  
 YLR292C YLR292C::SEC72::protein involved in membrane protein insertion into  
 the ER 1 0.888651408 1.201063371 0.911928919 1.31247127 1  
 0.895455851 0.895809948 1.465494268 1.133715089 1 0.89707469  
 1.120256392 1.186743118 1.129842047 1 1.299148941 0.931746648  
 0.730089685 1.689737652 1 1.477234505 1.205836989 1.625302902  
 1.256170647 1 1.00230542 1.410932362 1.08532569 0.981953456  
 1.131302213 1 1.135054917 1.463307433 1.011164193 1.03192003  
 1.405595187 1 1.170397564 1.251598264 1.138793773 1.271197987  
 1.064313636 1.130430592  
 YNL339C YNL339C::YRF1-6::Y'-helicase protein 1 1 1.613868963  
 1.352790461 1.480623962 1 1.544142327 1.365744264 1.366599655  
 1.607334772 1 1.434186788 1.518063837 1.531659474  
 1 0.892313762 0.839394108  
 1.022885925 0.918528372 1.027745312 1 1.035270696 1.095267322  
 0.951056094 1.045792694 1.181267582 1 0.855214873 1.458078204  
 1.021960728 1.392883975 1.066715988  
 YLR294C YLR294C::YLR294C::molecular\_function unknown 1 0.946309111  
 1.772601526 0.932259766 2.209634453 1 1.118625636 0.988922012  
 1.615705298 1.760128375 1 0.90986642 0.814378726 1.864296673  
 1.134039609 1 1.177045839 0.739269833 0.903501709 2.105826723 1  
 3.555336427 3.223281704 2.411237212 1 0.602477568 0.619467397  
 0.401178953 0.402827022 0.701226934 1 0.991689316 1.334761719  
 0.810315511 0.900763135 2.544591299 1 1.142441807 1.078657346  
 0.954194355 2.295696268 2.132551099 1.521834543  
 YNR014W YNR014W::YNR014W::molecular\_function unknown 1 1.227677084  
 1.369536804 0.695319221 0.639726528 1 1.083397908 0.819749502  
 0.690827802 1 1.526129871 1.743572314 3.173959467 0.840948011 1  
 0.940879581 1.421679295 1.762155002 0.8106092 1 0.760838371  
 1.185534886 1.169127158 0.484188252 1 0.913760861 0.759654979  
 0.622949036 0.79514579 0.857061098 1 0.897869189 0.786796321  
 1.345578217 0.774245827 1.148344805 1 0.821764226 0.916261123  
 0.756865335 1.068196129 1.041265894  
 YLR308W YLR308W::CDA2::Required for proper formation of the ascospore wall  
 1 2.211898459 1.89683233 2.008721107 1  
 2.112131349 1 1.948983972 2.10400205 1.910725013 1  
 1 1.23654379  
 1.076958279 0.92586519 1.209666898 1 0.880930394 0.980239236  
 1 1.094533343 0.725708556 1.203758855 0.876828162 1.15018825  
 1.063883189  
 YNR018W YNR018W::YNR018W::molecular\_function unknown 1 1.124198046  
 1.230840526 0.842022141 1.038976075 1 1.040471465 1.004995101  
 1.28599741 1.263002996 1 1.007867111 0.94096184 1.211697423  
 1.144042878 1 0.926660299 0.623275627 0.753368934 1.044268658 1  
 0.851895527 1.089471348 1.040233782 0.995543454 1 0.93454821  
 0.616101035 0.866765597 1.117639488 0.764484601 1 0.774728328  
 0.812880952 0.774488015 1.051198615 1.114972609 1 0.80463524  
 0.686873783 0.888319397 0.986760202 0.73652119 1.302928543  
 YLR310C YLR310C::CDC25::cell division cycle blocked at 36 degree C 1  
 1.382680955 1.222875559 1.508402964 1.105352933 1 1.383394489



|         |                                                  |             |             |             |             |             |             |
|---------|--------------------------------------------------|-------------|-------------|-------------|-------------|-------------|-------------|
|         | 0.954199805                                      | 1.34424163  | 1.37380191  | 1           | 0.702157609 | 0.846582651 |             |
|         | 1.324855725                                      | 1.07991121  |             |             |             |             |             |
| YNR038W | YNR038W::DBP6::Dead Box Protein 6                |             |             | 1           | 0.723996215 | 0.610330707 |             |
|         | 0.87714329                                       | 0.786313746 | 1           | 0.769902365 | 0.7838629   | 0.765290369 |             |
|         | 0.867890933                                      | 1           | 0.591735712 | 0.473612085 | 0.391015405 | 0.865166721 | 1           |
|         | 0.461171721                                      | 0.324995684 | 0.626247986 | 0.554202308 | 1           | 0.370764826 |             |
|         | 0.856470633                                      | 0.251347804 | 0.403530123 | 1           | 0.928441656 | 0.741891323 |             |
|         | 0.862679601                                      | 0.993005578 | 0.822755786 | 1           | 0.666898916 | 0.667657082 |             |
|         | 0.604991455                                      | 0.82607136  | 0.814576083 | 1           | 0.594180894 | 0.686801927 |             |
|         | 0.989227453                                      | 0.992879968 | 0.715754336 | 0.723265402 |             |             |             |
| YLR318W | YLR318W::EST2::ever shorter telomeres            |             |             | 1           | 1.431089989 |             |             |
|         | 1.582705391                                      | 1           | 1.732404066 | 1.653294779 |             | 1           |             |
|         | 1.509890333                                      | 1.62469665  | 1.387582974 |             | 1.207138699 | 1.30614987  |             |
|         |                                                  |             | 1           | 1.251743201 | 1.402725401 | 1.494338466 |             |
|         | 1.681115911                                      | 2.440873849 | 1           | 1.428439303 | 0.71120476  |             |             |
|         | 1.360175326                                      | 1           | 1.180046503 | 0.721834855 | 0.846198063 | 0.911369292 |             |
|         | 0.946918432                                      | 0.956181415 |             |             |             |             |             |
| YNR040W | YNR040W::YNR040W::molecular_function unknown     |             |             | 1           | 1.488093555 |             |             |
|         | 1.654406899                                      | 1.822757806 | 1.7970812   | 1           | 1.775887863 | 1.503049712 |             |
|         | 1.629257932                                      | 1           |             | 2.02524927  | 1.461556928 | 1.549476888 | 1           |
|         |                                                  | 0.908580659 |             | 0.295698427 |             | 1           |             |
|         | 0.938743544                                      | 0.87217118  | 0.924628932 | 1.002272195 | 0.889004182 | 1           |             |
|         | 1.028461881                                      | 0.980097295 | 0.88864216  | 0.920456574 | 0.993783191 | 1           |             |
|         | 0.877017558                                      | 1.000606756 | 0.956093747 | 1.194638678 | 1.055220267 | 1.084898103 |             |
| YLR332W | YLR332W::MID2::Protein required for mating       |             |             | 1           | 1.051018419 |             |             |
|         | 0.736429918                                      | 0.919384486 | 0.83640883  | 1           | 0.93951765  | 0.853198766 |             |
|         | 0.642869975                                      | 0.673033721 | 1           | 1.012109235 | 0.693933905 | 0.613693068 |             |
|         | 0.712113033                                      | 1           | 1.059123026 | 0.711841203 | 1.155979904 | 0.891094813 | 1           |
|         | 0.714021784                                      | 0.82390895  | 0.81299611  | 0.755775541 | 1           | 1.042983579 |             |
|         | 0.87292555                                       | 1.02961153  | 1.141449328 | 0.846809395 | 1           | 0.584158983 |             |
|         | 0.549778456                                      | 0.406160045 | 0.577348885 | 0.333559692 | 1           | 0.679100482 |             |
|         | 0.693017394                                      | 0.733051413 | 0.755492857 | 0.595255735 | 0.661971729 |             |             |
| YNR042W | YNR042W::YNR042W::molecular_function unknown     |             |             | 1           | 0.913750301 |             |             |
|         | 0.826347542                                      | 0.960621412 | 0.521236776 | 1           | 0.985965574 | 1.027310192 |             |
|         | 0.878627116                                      | 1           | 0.860627211 | 0.838102353 | 0.684586771 | 0.656556495 | 1           |
|         | 0.631653335                                      |             | 0.679903456 | 0.511598202 | 1           | 0.953618786 | 1.380500655 |
|         | 0.386055608                                      | 0.86149886  | 1           | 0.833857606 | 0.812442859 | 0.793497142 |             |
|         | 1.005472803                                      | 0.771157714 | 1           | 0.653223928 | 0.379613431 | 0.609856385 |             |
|         | 0.76765804                                       | 0.514990075 | 1           | 0.548113108 | 0.402000137 | 0.752587328 |             |
|         | 0.599096378                                      | 0.677747621 | 0.625195524 |             |             |             |             |
| YLR334C | YLR334C::YLR334C::molecular_function unknown     |             |             |             | 0.87051993  |             |             |
|         | 1.210563493                                      | 0.806183284 | 1.266785915 |             | 0.817241414 | 0.8237865   |             |
|         | 1.331604894                                      | 1.185747903 |             | 0.869260691 | 0.953003041 | 1.667543735 |             |
|         | 0.958430204                                      | 1           | 1.499080123 |             | 1.326890833 | 2.062229114 | 1           |
|         | 0.893379619                                      | 2.692518549 | 1.196273178 | 0.817315686 | 1           | 0.641554021 |             |
|         | 0.833651418                                      | 0.864049136 | 0.925939235 | 0.958551112 | 1           | 0.973566882 |             |
|         | 1.978789406                                      | 2.020170889 | 1           | 1.178782769 | 2.420424899 | 1.460211503 |             |
|         | 1.655348195                                      | 1.193634593 |             |             |             |             |             |
| YNR044W | YNR044W::AGA1::anchorage subunit of a-agglutinin |             |             | 1           |             |             |             |
|         | 0.709673711                                      | 0.56720244  | 0.664118444 | 0.52565601  | 1           | 0.596568723 |             |
|         | 0.868864435                                      | 0.399482628 | 0.472569415 | 1           | 0.782229571 | 0.685696956 |             |
|         | 0.564589363                                      | 0.475081754 | 1           | 0.792687343 | 0.741630272 | 1.022260398 |             |
|         | 0.877742215                                      | 1           | 0.638893041 | 0.914614524 | 0.813534159 | 0.577973139 | 1           |
|         | 1.068004029                                      | 0.931750637 | 1.18374322  | 1.205300108 | 0.854639457 | 1           |             |
|         | 1.307366244                                      | 1.223231964 | 1.302015777 | 1.006744828 | 1.015621525 | 1           |             |
|         | 0.756206998                                      | 0.930941312 | 0.651868824 | 1.113593095 | 0.57109783  | 10.90151863 |             |

|         |                                                                 |             |             |             |             |             |             |             |             |
|---------|-----------------------------------------------------------------|-------------|-------------|-------------|-------------|-------------|-------------|-------------|-------------|
| YNR044W | YNR044W::AGA1::anchorage subunit of a-agglutinin                | 1           |             |             |             |             |             |             |             |
|         | 1.428836827                                                     | 1.336297579 | 1.453393393 | 1           | 1.408903778 |             |             |             |             |
|         | 1.438780167                                                     | 1           | 1.576879828 | 1.599416042 |             |             |             |             |             |
|         | 1.229475817                                                     | 0.815536765 |             |             |             |             |             | 1           |             |
|         | 0.974825222                                                     | 0.743906868 | 0.808634286 | 0.900671639 | 0.616447524 | 1           |             |             |             |
|         | 0.791995879                                                     | 0.829019394 | 0.662218817 | 0.661657151 | 0.890667417 | 1           |             |             |             |
|         | 0.692015962                                                     | 0.754422669 | 0.894175366 | 1.055640337 | 0.835708849 | 0.553394393 |             |             |             |
| YLR336C | YLR336C::SGD1::Suppressor of Glycerol Defect                    | 1           |             |             |             |             |             |             | 0.719782441 |
|         | 0.694269347                                                     | 0.91646328  | 0.863398141 | 1           | 0.74056896  | 0.821397998 |             |             |             |
|         | 0.924437822                                                     | 0.887967856 | 1           | 0.463051157 | 0.487919037 | 0.367284317 |             |             |             |
|         | 0.941666918                                                     | 1           | 0.266180819 |             | 0.655549459 | 1           |             | 0.447916726 |             |
|         | 0.48898143                                                      |             | 1           | 0.692906374 | 0.816101965 | 0.795748775 | 0.89011724  |             |             |
|         | 1.033332443                                                     | 1           | 0.863000456 | 0.692595529 | 0.566680229 | 1.497084273 |             |             |             |
|         | 0.63003082                                                      | 1           | 0.65996247  | 0.69296557  | 0.943557706 | 0.798056531 |             |             |             |
|         | 0.638545014                                                     |             |             |             |             |             |             |             |             |
| YNR046W | YNR046W::YNR046W::molecular_function unknown                    | 1           |             |             |             |             |             |             | 0.941330592 |
|         | 1.035793227                                                     | 0.654638095 | 1.070940071 | 1           | 0.783627917 | 0.912138277 |             |             |             |
|         | 1.021562809                                                     | 1           | 0.865593824 | 0.656187197 | 0.844212528 | 0.924602944 | 1           |             |             |
|         | 0.560265525                                                     | 0.328344311 | 0.461714957 | 0.931378761 | 1           | 0.656280347 |             |             |             |
|         | 0.897412979                                                     | 0.626071616 | 0.784510112 | 1           | 1.110596608 | 0.774540679 |             |             |             |
|         | 0.607079268                                                     | 0.931108756 | 0.766373638 | 1           | 0.90332214  | 1.047292028 |             |             |             |
|         | 0.72235295                                                      | 1.048997375 | 1.934955694 | 1           | 0.743687243 | 0.84496612  |             |             |             |
|         | 0.87526011                                                      | 1.241417293 | 0.603541983 |             |             |             |             |             |             |
| YLR338W | YLR338W::KRE21::Killer toxin REsistant                          | 1           |             |             |             |             |             |             | 1.123118027 |
|         | 0.832240572                                                     | 1           | 1.319821005 | 1.371593579 | 0.863067268 | 1           |             |             |             |
|         | 1.382921498                                                     | 1.537005328 |             | 0.978599467 | 1           | 0.981268347 |             |             |             |
|         | 1.848561293                                                     | 1.676748001 |             | 0.695007702 | 0.695532195 | 0.460944811 | 1           |             |             |
|         | 1.020504618                                                     | 1.056506532 | 1.125837612 | 1.218632084 | 0.986025916 | 1           |             |             |             |
|         | 0.859416446                                                     | 1.06055388  | 0.70267273  | 0.829478468 | 0.9211859   | 1           |             |             |             |
|         | 0.773988614                                                     | 0.708890744 | 0.792919828 | 0.786921847 | 0.771133602 | 3.429819256 |             |             |             |
| YNR048W | YNR048W::YNR048W::molecular_function unknown                    | 1           |             |             |             |             |             |             | 1.45440137  |
|         | 1.282121505                                                     | 1.395051455 | 1.801395632 | 1           | 1.378722158 | 1.340092821 |             |             |             |
|         | 1.452108793                                                     | 1           | 1.764545905 | 1.817457146 | 2.154585618 | 2.132086482 | 1           |             |             |
|         | 0.792047222                                                     | 0.992279624 | 0.817629507 |             | 1           | 0.918317906 | 0.975656649 |             |             |
|         | 0.929800535                                                     |             | 1           | 1.001878918 | 0.999359166 | 0.786571338 | 0.839944109 |             |             |
|         | 0.859167451                                                     | 1           | 0.921173599 | 0.903197312 | 0.923689931 | 0.843384494 |             |             |             |
|         | 0.855610171                                                     | 1           | 1.072834102 | 0.952836181 | 0.934947346 | 1.110246207 |             |             |             |
|         | 1.008109664                                                     | 1.302052878 |             |             |             |             |             |             |             |
| YLR340W | "YLR340W::RPP0::Homology to rat P0, human P0, and E. coli L10e" | 1           |             |             |             |             |             |             |             |
|         | 1.131943835                                                     | 0.737068462 | 0.376802072 | 0.426865198 | 1           | 1.042056873 |             |             |             |
|         | 0.870333469                                                     | 0.451028053 | 0.457739261 | 1           | 0.945707963 | 0.677955125 |             |             |             |
|         | 0.519514107                                                     | 0.366688049 | 1           | 0.787782563 | 0.457515568 | 0.33759584  |             |             |             |
|         | 0.50346196                                                      | 1           | 0.922832379 | 0.639561306 | 0.279606186 | 0.53763137  | 1           |             |             |
|         | 1.108004697                                                     | 0.757770141 | 1.434770078 | 1.635660627 | 1.069281398 | 1           |             |             |             |
|         | 0.701327251                                                     | 0.80416636  | 0.503976803 | 0.391712355 | 0.396770307 | 1           |             |             |             |
|         | 0.801749039                                                     | 0.562976161 | 0.813615401 | 0.894740125 | 0.774491621 | 0.771424729 |             |             |             |
| YNR062C | YNR062C::YNR062C::molecular_function unknown                    | 1           |             |             |             |             |             |             | 0.989795299 |
|         |                                                                 | 1           | 1.017924346 |             | 0.937427238 | 1           | 1.041004707 |             |             |
|         | 0.968304599                                                     | 0.81559912  | 1.081403581 | 1           | 0.588181039 | 0.871086278 |             |             |             |
|         | 0.771819492                                                     | 1.165974892 | 1           | 0.96786156  | 2.612146677 | 1.811951636 |             |             |             |
|         | 1.051179755                                                     | 1           | 1.096193149 |             | 0.995440355 | 1           |             |             |             |
|         | 0.783510225                                                     | 0.748251976 | 0.688770121 |             | 1.785050927 | 1           | 0.666554329 |             |             |
|         | 0.942881664                                                     | 0.477160446 |             |             |             |             |             |             |             |
| YLR342W | YLR342W::FKS1::Required for viability of calcineurin mutants    | 1           |             |             |             |             |             |             |             |
|         | 1.322978298                                                     | 0.963812948 | 1.416537664 | 0.90366199  | 1           | 1.37471575  |             |             |             |
|         | 1.297962812                                                     | 1.02107075  | 0.841502684 | 1           | 1.168660143 | 0.960784056 |             |             |             |
|         | 0.547937046                                                     | 1.306116758 | 1           | 0.886907608 | 0.714181466 | 0.789020611 |             |             |             |

|             |                                                                |             |             |             |             |   |
|-------------|----------------------------------------------------------------|-------------|-------------|-------------|-------------|---|
| 0.400669506 | 1                                                              | 0.332409694 | 0.222841847 | 0.227955983 | 0.313816961 | 1 |
| 1.035445864 | 0.740099539                                                    | 1.230510241 | 1.539676913 | 1.106385335 | 1           |   |
| 1.078934002 | 0.607917804                                                    | 0.643315818 | 0.971931836 | 0.435120223 | 1           |   |
| 0.659336344 | 0.466147298                                                    | 0.636165376 | 0.53060079  | 0.50369226  |             |   |
| YNR064C     | YNR064C::YNR064C::molecular_function                           | unknown     | 1           | 1.49025652  |             |   |
| 1.113273807 | 1.197166983                                                    | 1.959592594 | 1           | 1.127210308 | 2.454273893 |   |
| 6.106226286 | 1.268911922                                                    | 1           | 181.3904897 | 280.1625842 | 245.7150372 |   |
| 218.8863986 | 1                                                              | 59.1096923  | 157.4428228 | 152.5132481 | 152.6292    | 1 |
| 0.715375973 | 0.727561105                                                    | 0.700694321 | 1.218189594 | 1           | 1.049640345 |   |
| 1.876640111 | 5.84518339                                                     | 7.812375066 | 2.879588679 | 1           | 0.933833011 |   |
| 2.198790486 | 6.010828605                                                    | 6.391367552 | 3.015126296 | 1           | 0.685784945 |   |
| 0.962124794 | 1.027384662                                                    | 1.046640019 | 21.45629024 |             |             |   |
| YLR356W     | YLR356W::YLR356W::molecular_function                           | unknown     | 1           | 1.056087158 |             |   |
| 1.323656229 | 0.963963182                                                    | 0.962392735 | 1           | 1.013157843 | 1.263371204 |   |
| 1.144473057 | 1                                                              | 1.386731348 | 1.610887218 | 3.134085988 | 1.112049223 | 1 |
| 2.692481078 | 2.11942594                                                     | 3.959601686 | 1           | 1.326206108 | 2.001784022 |   |
| 1.346988471 | 0.945917305                                                    | 1           | 1.290730506 | 1.447691806 | 1.599256106 |   |
| 1.253030238 | 0.967156083                                                    | 1           | 0.867710081 | 1.373930424 | 1.360268447 |   |
| 1.240506284 | 1.19915655                                                     | 1           | 1.009030838 | 1.278499478 | 1.123655245 |   |
| 1.235280881 | 1.507660106                                                    | 1.154072396 |             |             |             |   |
| YLR358C     | YLR358C::YLR358C::molecular_function                           | unknown     | 1           | 1.030169206 |             |   |
| 1.373411188 | 1.087212667                                                    | 1.415530745 | 1           | 1.044908695 | 1.292909188 |   |
| 1.26668609  | 1.470913926                                                    | 1           | 1.055656427 | 1.100208158 | 1.379927067 |   |
| 1.314711178 | 1                                                              | 0.740440403 | 0.798829114 | 0.863814916 | 0.852779956 | 1 |
| 0.796677929 | 1.151775638                                                    | 1.135226773 | 0.713440248 | 1           | 2.270788391 |   |
| 2.065556675 | 1.921608973                                                    | 2.229041341 | 2.344722293 | 1           | 0.820489742 |   |
| 1.209661963 | 0.749445773                                                    | 0.758326264 | 1.296353766 | 1           | 1.173221635 |   |
| 1.381999418 | 1.233032469                                                    | 1.243787602 | 1.200782267 |             |             |   |
| YLR360W     | YLR360W::VPS38::involved in vacuolar protein targeting         |             | 1           |             |             |   |
| 0.974042401 | 1.11900313                                                     | 0.900833339 | 1.335908181 | 1           | 0.927533028 |   |
| 0.975230808 | 1.295030216                                                    | 1.109133595 | 1           | 1.013984051 | 1.137299333 |   |
| 1.374474444 | 1.039400586                                                    | 1           | 1.422780244 | 1.019020021 | 1.293068999 |   |
| 1.627763639 | 1                                                              | 1.293103798 | 2.200815651 | 1.743549861 | 0.995999379 | 1 |
| 1.127545411 | 1.196885243                                                    | 0.83433304  | 0.937645224 | 1.035815951 | 1           |   |
| 1.091255934 | 1.738777521                                                    | 0.994891237 | 1.253110181 | 2.105866557 | 1           |   |
| 1.014823179 | 1.465256287                                                    | 0.877271515 | 1.172468223 | 0.862489653 |             |   |
| YGR215W     | YGR215W::RSM27::mitochondrial ribosome small subunit component |             | 1           |             |             |   |
| 0.997380006 | 1.34288497                                                     | 1.05569788  | 1.527489759 | 1           | 0.938925093 |   |
| 0.993280785 | 1.655657337                                                    | 1.503827846 | 1           | 1.133494835 | 1.120840674 |   |
| 1.692970926 | 1.253217234                                                    | 1           | 0.893017162 | 0.823420526 | 0.830896702 |   |
| 1.184414449 | 1                                                              | 1.79200601  | 2.432911002 | 2.240700042 | 1.533560201 |   |
| 1.232561929 | 1.481845623                                                    | 0.895148813 | 0.947255233 | 1.029594248 | 1           |   |
| 1.189022901 | 1.55833995                                                     | 1.169800507 | 1.399754965 | 1.787252337 | 1           |   |
| 0.928163231 | 1.326322374                                                    | 1.041709113 | 1.279907575 | 1.622308669 | 1.313436    |   |
| YGR217W     | YGR217W::CCH1::calcium channel                                 |             | 1.055212951 |             |             |   |
| 0.872261352 |                                                                | 0.826430337 | 1.060956154 |             |             |   |
| 1.053486123 | 0.775359284                                                    |             |             |             |             |   |
|             | 1                                                              | 0.87077674  | 0.919605318 | 1.000969766 | 0.975839711 |   |
| 1.001235937 | 1                                                              | 0.966409698 | 1.015635265 | 0.875630585 | 0.940285433 |   |
| 0.892396706 | 1                                                              | 0.927160669 | 1.021639535 | 0.898117829 | 0.945799079 |   |
| 0.774132361 | 2.874673585                                                    |             |             |             |             |   |
| YGR219W     | YGR219W::YGR219W::molecular_function                           | unknown     | 1           | 1.247473984 |             |   |
| 1.585553369 | 1.193406587                                                    | 2.025784304 | 1           | 1.04920563  | 1.149565927 |   |
| 1.768758109 | 1.727044689                                                    | 1           | 1.188832121 | 1.267075265 | 2.110966697 |   |
| 1.288169313 | 0.52306237                                                     | 0.358005671 | 0.31846818  | 0.444221596 |             |   |
| 1.137228678 | 0.832329326                                                    | 1           | 0.931814753 | 1.035681151 | 0.621591978 |   |
| 0.568954012 | 0.768035819                                                    | 1           | 1.176432603 | 1.458644479 | 1.030042794 |   |



|         |                                                           |             |             |             |             |             |
|---------|-----------------------------------------------------------|-------------|-------------|-------------|-------------|-------------|
|         | 0.856633994                                               | 1.618183475 | 1           | 1.364212404 | 1.667298053 | 0.983124729 |
|         | 1.803510143                                               | 1.715617622 | 1.867705902 |             |             |             |
| YGR221C | YGR221C::TOS2::Target of SBF                              |             |             | 1           | 0.75322203  | 0.791987285 |
|         | 0.887412543                                               | 0.855753894 | 1           | 0.786448419 | 0.864654066 | 0.778542503 |
|         | 1.004292016                                               | 1           | 0.651159561 | 0.605325868 | 0.747774268 | 1.020464025 |
|         | 0.654070833                                               |             | 0.684913053 | 0.89903925  | 0.358563434 | 0.430514304 |
|         | 0.735405986                                               | 0.759906667 | 1           | 1.103270862 | 1.146153505 | 1.328495148 |
|         | 1.216519198                                               | 1.164463249 | 1           | 1.138665128 | 1.160128421 | 1.155994999 |
|         | 1.161352344                                               | 0.88869216  | 1           | 0.936466695 | 1.092800326 | 1.199808791 |
|         | 1.025648903                                               | 1.140580212 | 1.03761439  |             |             |             |
| YNR066C | YNR066C::molecular_function unknown                       |             |             | 1           | 0.871728207 |             |
|         | 0.998816137                                               | 0.990930084 | 0.918142763 | 1           | 1.072978662 | 0.994344765 |
|         | 0.791550562                                               | 1           | 1.211057966 | 1.080978145 | 1.032693617 | 0.997257138 |
|         | 0.966625228                                               | 0.995795188 | 1.431937482 | 1.086928345 | 1           | 0.81647948  |
|         | 1.437799372                                               | 1.175596687 | 0.831349318 | 1           | 0.90923054  | 0.96888295  |
|         | 0.778525298                                               | 0.920167512 | 0.997277315 | 1           | 0.807135377 | 0.563084146 |
|         | 0.725673921                                               | 0.745950907 | 0.604770913 | 1           | 0.789597985 | 0.7990066   |
|         | 0.925533592                                               | 0.708791477 | 0.900877149 | 0.773176006 |             |             |
| YGR223C | YGR223C::molecular_function unknown                       |             |             | 1           | 0.740168621 |             |
|         | 0.882118346                                               | 0.937939428 | 0.936195988 | 1           | 0.877816588 | 0.902207696 |
|         | 1.044558084                                               | 0.980206942 | 1           | 1.043413766 | 1.052274043 | 1.202233908 |
|         | 1.015281208                                               | 1           | 1.360522194 | 1.002252214 | 1.314757711 | 1.538305833 |
|         | 3.172117993                                               | 2.491999656 | 2.577500892 | 2.247889404 | 1           | 1.135462767 |
|         | 1.457221679                                               | 1.232372814 | 0.840192964 | 0.999168962 | 1           | 1.307737441 |
|         | 1.686558479                                               | 1.446758603 | 1.184741578 | 1.495257407 | 1           | 1.483126091 |
|         | 1.542938404                                               | 1.224324619 | 1.342715264 | 1.367343321 | 1.419386549 |             |
| YNR068C | YNR068C::molecular_function unknown                       |             |             | 1           | 0.932753138 |             |
|         | 0.977380393                                               | 0.950342006 | 1.04549114  | 1           | 0.904875214 | 0.979206494 |
|         | 0.890540328                                               | 1           | 2.234288656 | 1.738357195 | 1.098992183 | 0.764237092 |
|         | 0.427198636                                               | 0.441663337 | 0.663833985 | 0.620259856 | 1           | 0.914332046 |
|         | 1.87239978                                                | 1.183387573 | 0.89717232  | 1           | 1.265362998 | 1.620448821 |
|         | 1.254322764                                               | 0.997289704 | 1.009422248 | 1           | 2.355174744 | 1.151515025 |
|         | 1.405316328                                               | 0.920235919 | 1.212232805 | 1           | 2.310765319 | 1.17830588  |
|         | 1.118673207                                               | 1.036919128 | 1.189097427 |             |             |             |
| YGR237C | YGR237C::molecular_function unknown                       |             |             | 1           | 0.653420113 |             |
|         | 0.924193909                                               | 0.885730014 | 0.749658001 | 1           | 0.821924133 | 0.95955287  |
|         | 0.766876163                                               | 0.672907774 | 1           | 0.889554099 | 1.070099536 | 1.009079811 |
|         | 0.863605414                                               | 1           | 1.632782769 | 1.78694228  | 2.083061173 | 1.142146823 |
|         | 0.53900932                                                | 0.938185726 | 0.632424942 | 0.597923713 | 1           | 1.154959459 |
|         | 1.502876462                                               | 1.272896433 | 1.048442748 | 1.191405885 | 1           | 1.241236492 |
|         | 1.353513361                                               | 1.44155742  | 1.192176976 | 1.079858155 | 1           | 1.343055146 |
|         | 1.41349461                                                | 1.295007323 | 1.189576625 | 1.454541217 | 0.909773366 |             |
| YNR070W | YNR070W::PDR18::pleiotropic drug resistance               |             |             | 1           | 1.145118468 |             |
|         | 0.922312839                                               | 1.226830184 | 0.862436266 | 1           | 1.169632128 | 1.394273793 |
|         | 0.925325742                                               | 1           | 1.716286474 | 1.311946663 | 0.705417045 | 1           |
|         | 0.829943581                                               |             | 1.225304312 | 0.628074447 | 1           | 0.891451406 |
|         | 1                                                         | 0.888398495 | 0.825501613 | 0.892477021 | 0.959827743 | 0.827446124 |
|         | 1.063028586                                               | 0.910646269 | 0.846404974 | 0.911244277 | 0.970214753 | 1           |
|         | 0.849756856                                               | 0.811668151 | 1.040054728 | 1.087057089 | 0.888350422 | 0.839723408 |
| YLR362W | YLR362W::STE11::involved in the mating signalling pathway |             |             | 1           |             |             |
|         | 0.860713359                                               | 0.981649165 | 1.093238029 | 0.964412592 | 1           | 0.970770962 |
|         | 1.017981312                                               | 1.039070548 | 0.969369707 | 1           | 1.037009632 | 1.085079506 |
|         | 0.989980524                                               | 1.141184392 | 1           | 1.028508246 | 0.633018676 | 0.922990501 |
|         | 0.949405623                                               | 1           | 0.924782619 | 0.948992732 | 1.003959151 | 0.899313736 |
|         | 1.226590205                                               | 1.18632137  | 1.125081153 | 1.158838453 | 1.394699695 | 1           |
|         | 1.167818474                                               | 1.188555109 | 0.978335904 | 1.18531727  | 0.787902193 | 1           |
|         | 0.904084066                                               | 0.93881438  | 0.87587008  | 0.962777435 | 0.618696892 | 1.319565341 |

YGR239C YGR239C::PEX21::Peroxin; Pex18p and Pex21p are partially functionally redundant. 1 0.977235958 0.964732347 0.861671636 0.945730087 1 0.814716384 0.803916455 1.107780216 1.164977602 1 1.4147515 0.835578574 0.745411889 0.989066156 1 1.039782577 1.593594465 0.708197581 1.27069749 1 1.60630702 2.092680416 1.798971758 1.405188953 1 1.038107152 0.934051161 0.703828885 0.817751318 0.94102185 1 1.012689078 1.256407266 0.858485394 1.153146659 1.877493034 1 0.888560386 1.083015638 1.552818099 0.955389807 1.407127762

YNR072W YNR072W::HXT17::Hexose transporter 1 0.762075925 0.858071458 1.117448054 0.965640131 1 1.100996117 1.228156148 1.026703397 1 0.971063419 0.894130655 0.79048544 1.083755608 1 0.921715846 1.122176609 1.336550614 1.10214443 1 0.9263017 2.229985931 0.809432013 0.916105735 1 0.851102373 0.948459605 0.895321103 0.811376344 1 0.792059797 0.732460031 0.939448568 1.144515857 0.906372149 0.857888375 0.878799763 1.115679425 0.843195016 1.351716978 0.922032049

YLR364W YLR364W::YLR364W::molecular\_function unknown 1 1.484427468 1.965974895 1.099240976 1.958819981 1 1.178794413 1.133541631 1.770920497 1.788989757 1 1.350763859 1.670744008 1.753638541 1.509310887 1 1.42385626 1.156075789 0.825429689 1.916701888 1 2.551908132 3.672451307 1.942549758 2.383048218 1 1.025559156 0.876446369 0.55081364 0.892530365 0.969484626 1 1.185059098 1.744565507 0.753009365 0.935207426 3.432243271 1 1.182077933 1.395767982 0.972301979 1.771590769 1.389817965

YGR241C "YGR241C::YAP1802::Yeast Assembly Polypeptide, member of AP180 protein family, binds Pan1p and clathrin" 1 1.183696865 1.235368973 1.311147742 1.085205549 1 1.211351945 1.248863869 1.097642557 0.93967454 1 1.204822432 1.247820337 1.02215536 1.150294899 1 0.687525864 0.673583554 0.565785164 1 0.982832698 1.650646522 1.459692589 0.741718127 0.790576756 1 1.349647396 3.254713424 2.865755699 1.629746919 1 1.172845774 1.795965314 0.894871475 1.127234299 2.201318683

YOL009C YOL009C::MDM12::Required for normal mitochondrial morphology and distribution 1 0.922902152 1.199005752 1.039388124 1.290254838 1 1.132053748 1.122878145 1.243218383 1.208530395 1 0.876049494 1.241713457 1.274949222 1.139677269 1 1.444213419 1.053347316 1.707397704 1.907052999 1 1.511843968 2.587375522 1.97669266 1.268474717 1 1.011222774 1.265863733 1.083256577 1.080605511 1.145388598 1 0.988243649 1.168707171 1.151414935 1.099424427 1.411202858 1 1.069155853 1.175858675 1.3100185 1.146191829

YLR366W YLR366W::YLR366W::molecular\_function unknown 1 1.184201417 1 0.798400527 0.105939195 0.098929192 1 0.842417527 0.905854126 1.063344379 1.138000608 1.048765565 1 0.761414121 0.920608301 0.803976931 1 0.949537298 1.039645105 0.961195633 0.892965516 1.244907001

YGR243W YGR243W::YGR243W::molecular\_function unknown 1 1.028556101 1.477383284 0.911087146 1.174541153 1 0.986524764 1.161363856 1.27684135 1.035020877 1 1.22835238 1.613760308 3.150409436 1.172052742 1 2.538224054 2.104811737 3.412223417 4.305554785 1 4.698036194 4.772454459 7.704508672 3.090384283 1 0.990626674 1.117038924 1.045622507 0.873000633 0.871915874 1 0.640130399 0.954568534 1.722148316 0.962940353 1.204299628 1 0.652386376 0.938953895 1.367659078 1.090107367 1.70095549 1.451784585

YOL011W YOL011W::PLB3::Phospholipase B 1 0.744912931 0.636634419  
0.853147178 0.563297655 1 0.851378293 0.954926441 0.584722957  
0.671593357 1 0.677780467 0.699833971 0.451694137 0.749435382 1  
0.79985801 0.722081567 0.994155791 0.749446211 1 1.046244921  
1.243945318 0.679186659 0.847507961 1 1.040329141 1.009893618  
1.328200865 1.063826969 0.862426726 1 0.685671596 0.628388648  
0.823217437 0.731486456 0.60332054 1 0.636910512 0.678887797  
1.024079728 0.775358131 0.902106056 0.808200933  
YLR380W "YLR380W::CSR1::chs5 spa2 rescue; isolated as a multicopy suppressor  
of the lethality of chs5 spa2 double mutant at 37 degrees. Also Sec14p homolog,  
putative phosphatidylinositol transfer protein." 1 1.23631259  
1.200004822 0.786236739 0.654648591 1 1.317486618 1.219717595  
0.738358649 0.719333683 1 1.171463373 1.145625144 0.991000915  
0.836181835 1 1.016495472 0.759547391 0.754787478 0.738235514 1  
0.427243738 0.397402142 0.275215361 0.547386171 1 1.101686945  
1.014834259 1.155038897 1.418276896 1.153826618 1 0.879953882  
0.957929724 0.778998176 1.114474555 0.799161584 1 0.830838065  
0.81700321 1.080524105 0.818415885 0.659685418 1.089276219  
YGR245C YGR245C::SDA1::Severe Depolymerization of Actin 1 0.966841375  
0.714224298 0.916958681 0.716301799 1 0.816941682 0.745803042  
0.896285443 0.837088755 1 0.722316979 0.401791694 0.223439372  
1.032460781 1 0.676367647 1  
1 0.789850955 0.547593767 0.596376598 0.933626325 0.921413317 1  
0.854033544 0.563007718 0.435302464 0.817615004 0.871541442 1  
0.599305059 0.527963821 0.85608197 1.059644797 0.350572822 0.72501668  
YOL013C YOL013C::HRD1::Ubiquitin-protein ligase for endoplasmic reticulum-  
associated degradation. 1 0.851592049 0.860585631 0.927234402 0.993166543 1  
0.97571229 1.067723212 0.906070387 0.903062953 1 1.11562435  
1.250678582 0.879019566 0.96606905 1 1.793446421 0.693430534  
1.759146932 1.238581343 1 1.641655539 1.773370403 1.280048006  
1.153265088 1 1.794450308 2.132755774 1.688198538 1.400445463  
1.156446664 1 1.460068955 1.456061234 1.804650899 1.111654056  
1.101810632 1 1.514015435 1.576846491 1.445133514 1.360371089  
1.524967477 1.077017537  
YLR382C YLR382C::NAM2::mitochondrial leucyl tRNA synthetase 1  
0.651876038 0.774293269 0.943031878 0.648869674 1 0.926704827  
0.673771018 1 0.762818599 0.771966911 0.583500035 0.708481045 1  
1.397322531 0.970433352 1.274189835 1.06086628 1 1.794972605  
2.170739131 1.363174122 1 1.263152564 1.013056859 1.136829022  
1.330082425 1.389001992 1 1.518578027 0.798266934 0.757072872  
1.129953151 0.518988791 1 0.73057366 0.787697957 1.045373822  
0.605863646 0.842712717  
YOL015W YOL015W::YOL015W::molecular\_function unknown 1 1.425487525  
1.292987955 1.513443303 1 1.451089276 1.458092687 1  
1.210579302 1.324986743 1.672067805 1 0.733355339 0.899967835  
0.902181356 1 0.708822293 2.174188101 1  
1.053499214 0.837740313 1.159949801 1.102567713 1 1.082768962  
1.075249383 0.798738301 1.18132601 1 1.229965791  
1.223650939 1.521969733 1.576026606 0.641832375  
YLR384C YLR384C::IKI3::RNA polymerase II Elongator subunit  
1.204198668 0.840447656 1.354074768 0.866387556 1.251892799  
1.296090702 0.885086617 0.851210833 0.940392926 0.799634033  
0.420683777 1.120942386 0.99400465 0.744036771  
0.529696 1 0.687132196 0.975354226  
1.650042762 0.932277189  
1.85667492 1.098499683 1.19283856

YLR384C YLR384C::IKI3::RNA polymerase II Elongator subunit

1 0.956092851

0.603296454 0.746879862 1.821751438 1.073819373 1 0.600866872

0.188912382 0.187284994 0.529494453 0.319726493 1 0.543655316

0.218762474 0.531724687 0.60743268 0.432813008 0.713633558

YOL017W YOL017W::ESC8::Establishes Silent Chromatin 8 1 1.49116797

1.686510098 2.013525153 2.105368144 1 2.067591373 2.160851217

1 1.108630177 0.91799453 1.201078136 2.206523137 1 0.409550326

0.358065565 0.386455782 1.292964627 1 0.798496964

1.832908114 1 0.74859792 0.719898886 0.930809793 0.638859942

1.156397367 1 1.110824256 1.307646005 1.229226458 1.1801633

1.175383425 1 1.213713037 1.249773955 1.124433711 1.328684592

1.450969039 0.992082006

YLR386W YLR386W::VAC14::VACuole morphology and inheritance mutant 1

0.68728401 0.663434204 0.905348003 0.560262422 1 0.875251146

0.691603792 1 0.70622523 0.689478768 0.464089346 0.841038885 1

1.191093127 0.865087649 1 0.814528003

0.87194246 1 1.021354026 0.973744364 1.276750631 1.253569856

1.119909267 1 0.925787484 1.001352392 0.90045935 1.214543177

0.85166776 1 0.940948768 1.203645136 1.226030885 1.073776949

0.930930812 0.762668497

YOL019W YOL019W::TOS7::molecular\_function unknown 1 1.356546676

1.081881094 1.737798325 1.513463561 1 1.330586321 1.526914613

1.213457429 1.260067395 1 1.12722675 0.876158183 0.630943923

1.501450674 1 0.640459846 0.562223875 0.419226664 1

0.562317472 0.632577168 0.763536685 1 0.857788095 0.835524465

0.974531862 1.046134495 0.875025112 1 0.793830638 0.731128993

0.693360602 0.475541463 0.58314385 1 0.802708557 0.734978076

1.105848991 0.794156098 1.174484277 0.624319912

YLR388W YLR388W::RPS29A::Homology to rat S29 1 1.47262027

1.942723951 0.868046146 2.317857904 1 1.130678683 1.205111351

1.689057126 1.524469055 1 1.134553958 1.075654593 1.161603029

1.03064755 1 0.742702717 0.324226492 0.250282213 0.619608112 1

1.690978121 1.53501616 0.725007701 0.764900606 1 0.985258713

1.073475105 0.71133357 0.95067597 1.283907271 1 1.209863553

1.863431744 0.867361267 0.972247383 1.674946168 1 0.98430221

1.629552746 1.073377951 2.246753459 1.512037534 1.305555433

YLR390W YLR390W::ECM19::ExtraCellular Mutant 1 1.139712962

1.90209355 1.21235316 2.258093465 1 1.256249487 1.522988864

1.997906789 1.865986375 1 1.397207425 1.713340651 2.629995874

1.395808034 1 1.369491254 1.095053893 1.271694099 1.254010448 1

1.795294321 3.28398696 2.437790797 1.359233818 1 1.468341488

1.728399523 1.24267037 1.269130768 1.621735054 1 1.262787634

2.078350964 0.982125883 1.462514631 1 0.911865058 1.245459088

1.142447229 1.207018085 1.177654221

YLR404W YLR404W::YLR404W::molecular\_function unknown 1 1.366901133

1.426059161 1.343750376 1.389690747 1 1.458227871 1.338959987

1.291447981 1.439660177 1 1.147903673 1.136290912 0.893814158

1.14141574 0.437893748 1 0.985585033

1 0.991126267 1.087847904 0.90135384 0.854377952 0.966150376 1

0.945600255 1.286143768 0.928828254 0.875274866 1.405650237 1

1.109091922 1.352354303 1.005334258 1.427879786 1.004430466 1.488560842
